# Supplementary material for: Genome-wide comparison of microRNAs and their targeted transcripts among leaf, flower and fruit of sweet orange
Source: PubMed Central journal article supplement (PMC4158063; doi:10.1186/1471-2164-15-695), 2014-08-20

**Additional file 1: Predicted secondary structures of known and novel miRNAs.**

The mature miRNA sequences are highlighted in yellow. For novel miRNAs, the miRNA\* sequences are highlighted in gray.

# Secondary structure for miR1092.2

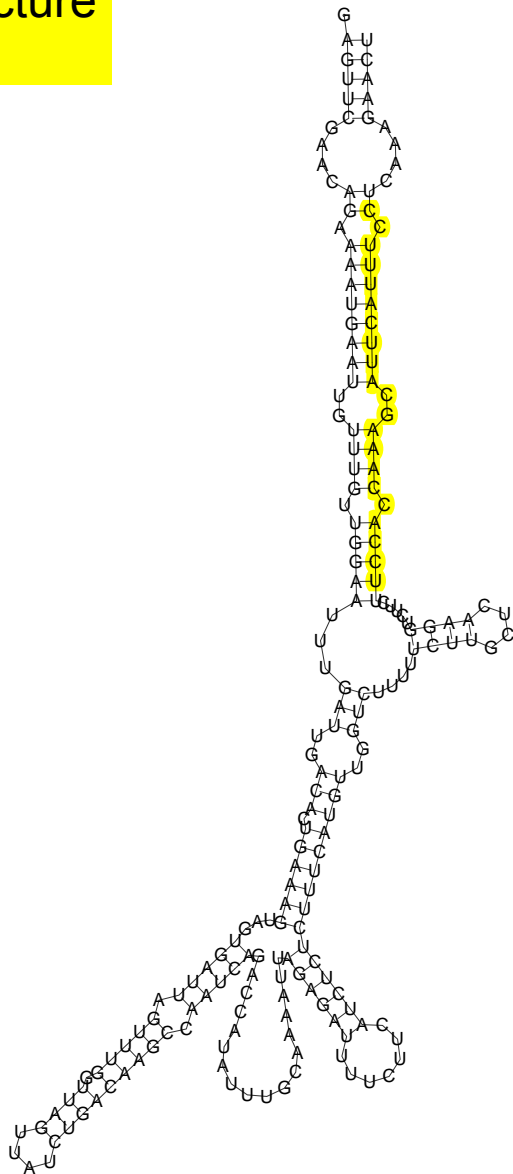







# Secondary structure for miR1515

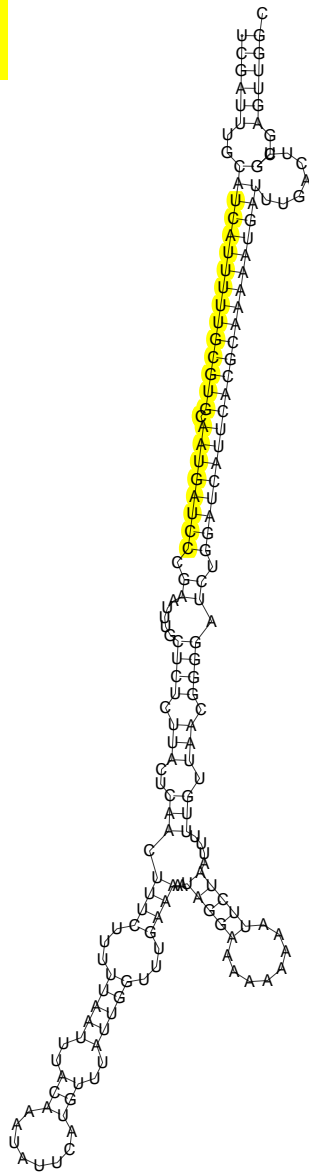

# Secondary structure for miR156a.1

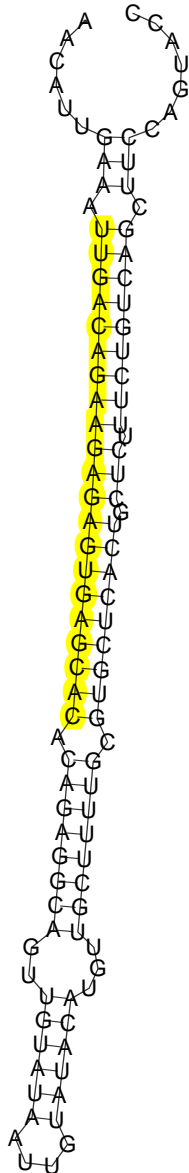

Secondary structure  
for miR156a.2

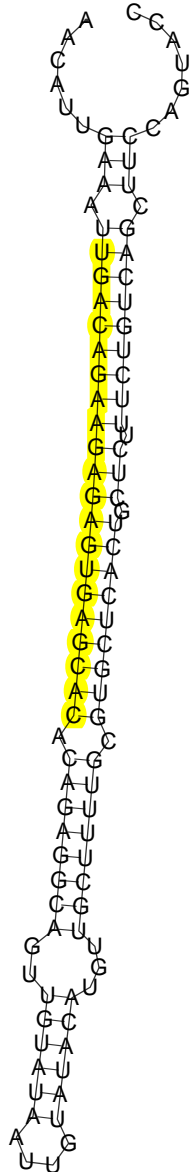





Secondary structure for miR156c.1

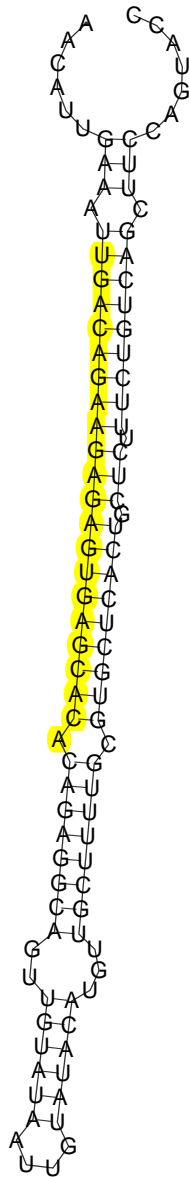





Secondary structure for miR156f.2

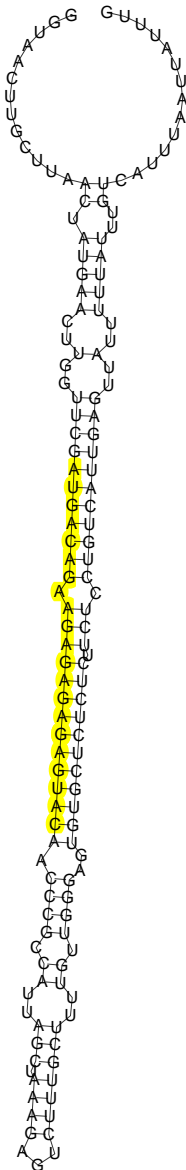

# Secondary structure for miR156g.1

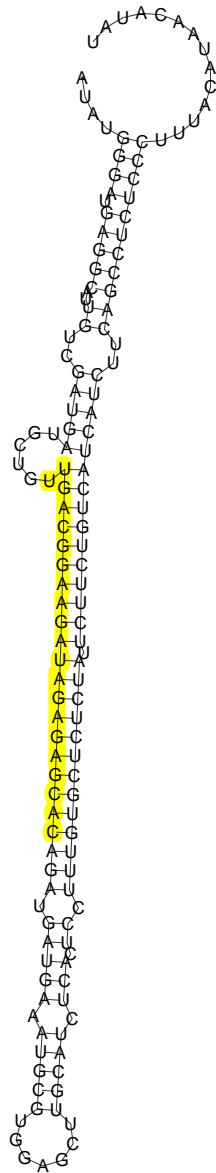



Secondary structure  
for miR156h

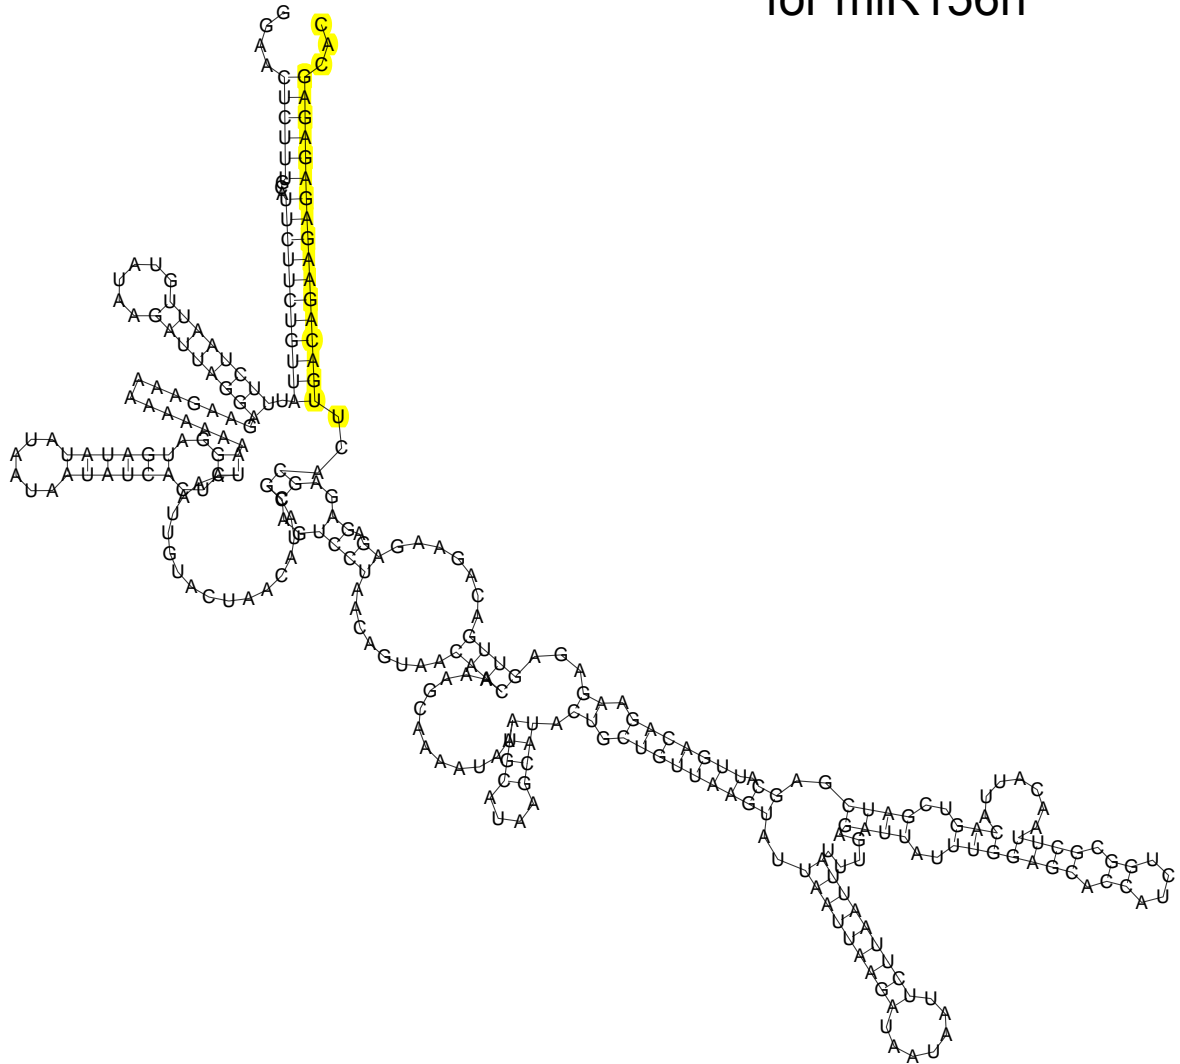



# Secondary structure for miR159

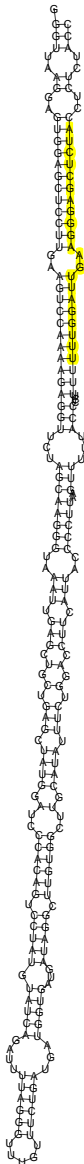











# Secondary structure for miR160c.1

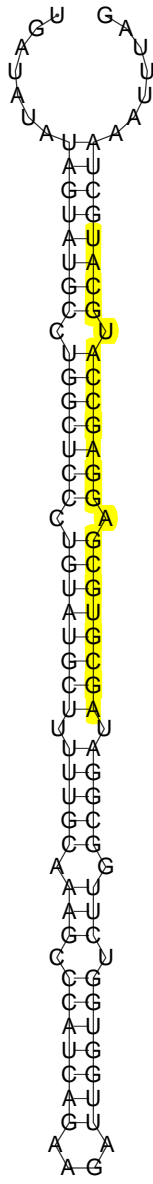

# Secondary structure for miR160c.2

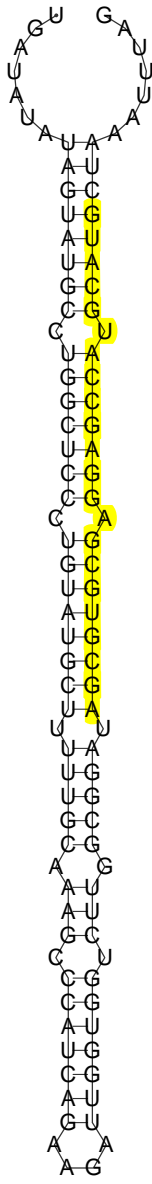



# Secondary structure for miR162-3p.1

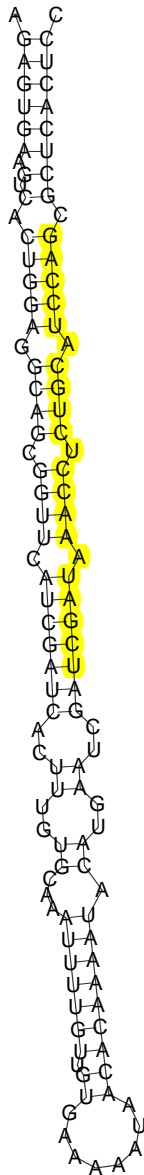

# Secondary structure for miR162-3p.2

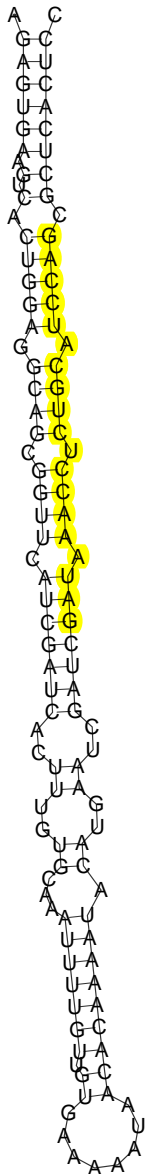



# Secondary structure II for miR164

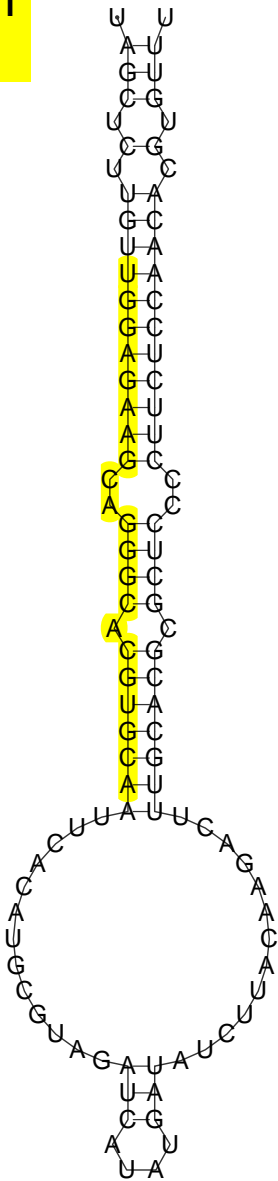

# Secondary structure I for miR166a.1

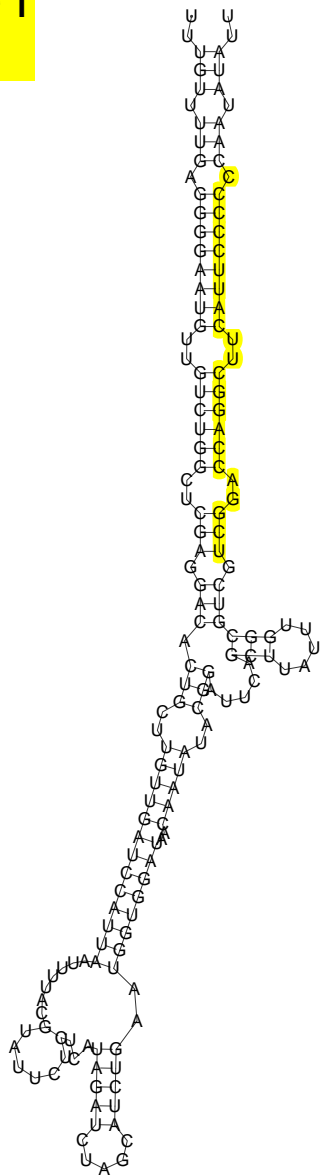

# Secondary structure II for miR166a.1

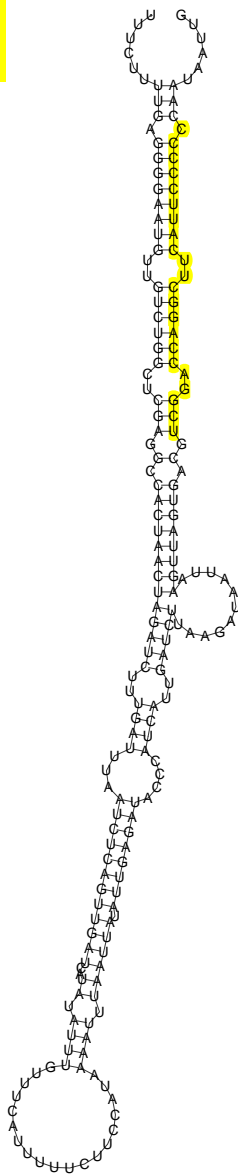



# Secondary structure I for miR166a.2

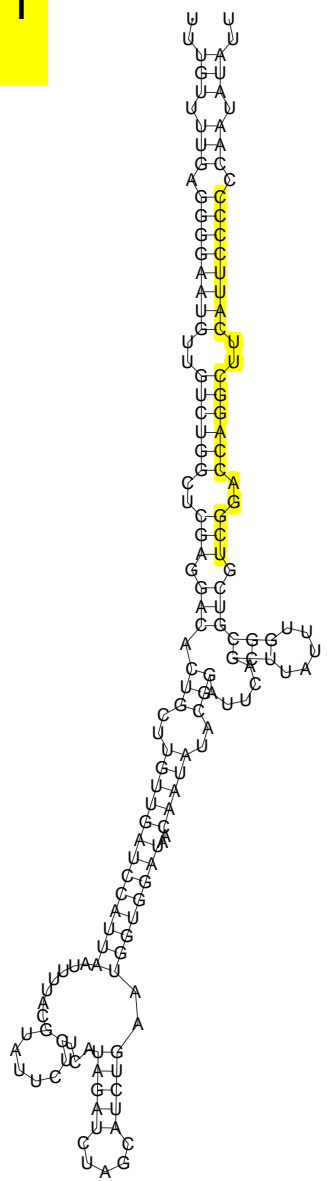



# Secondary structure II for miR166a.2

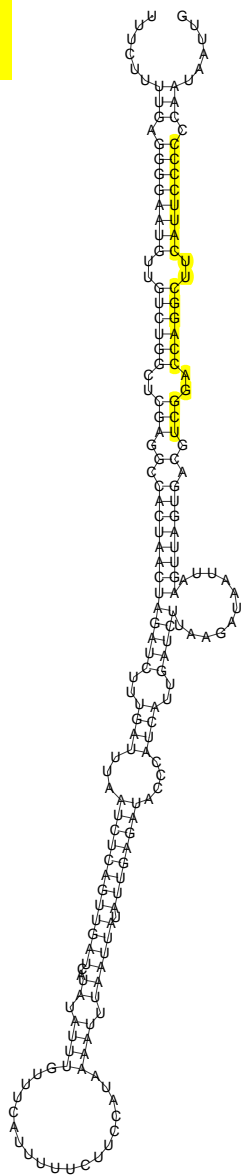

Secondary structure III  
for miR166a.2

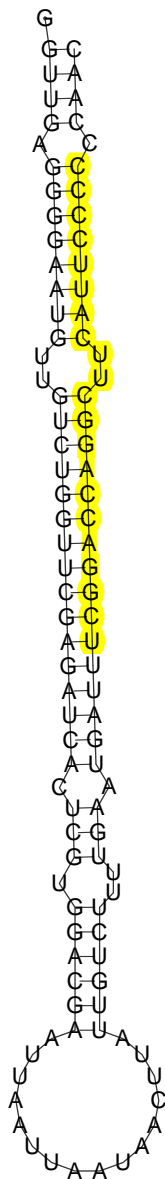

Secondary structure for miR166b

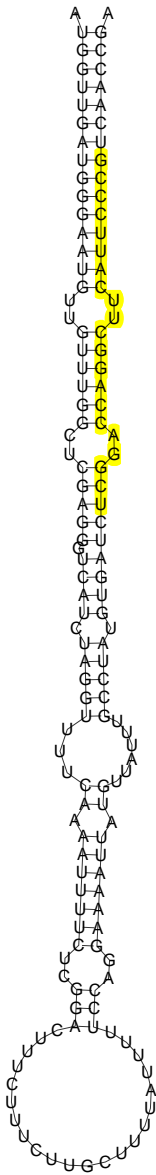

**Secondary structure I  
for miR166c.1**

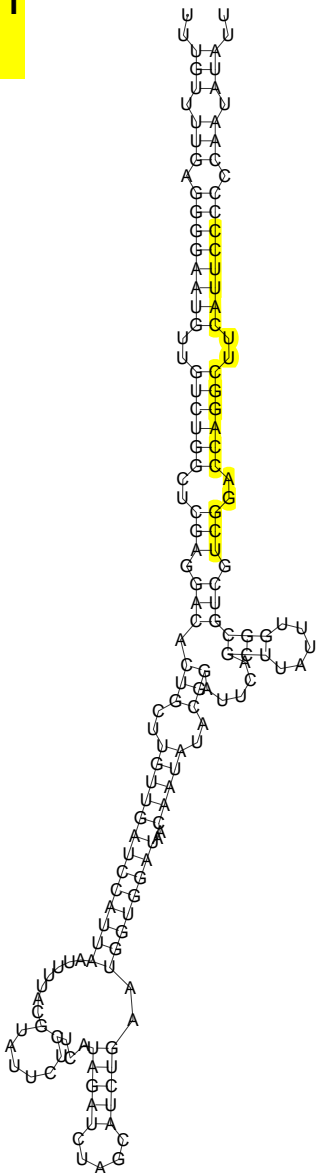

Secondary structure II  
for miR166c.1

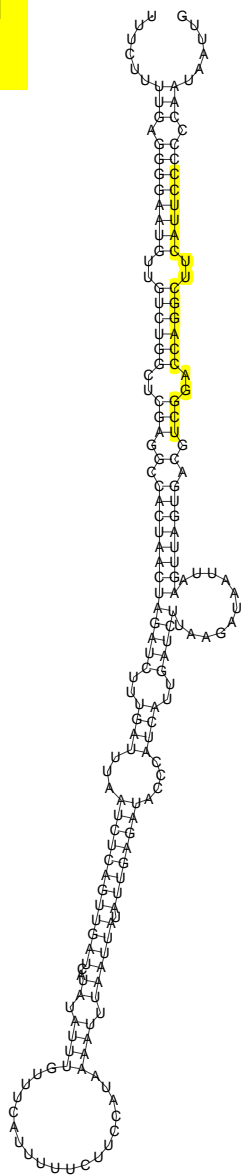

# Secondary structure III for miR166c.1

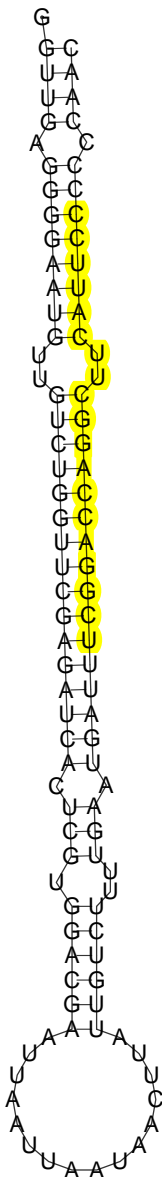



# Secondary structure I for miR166c.2

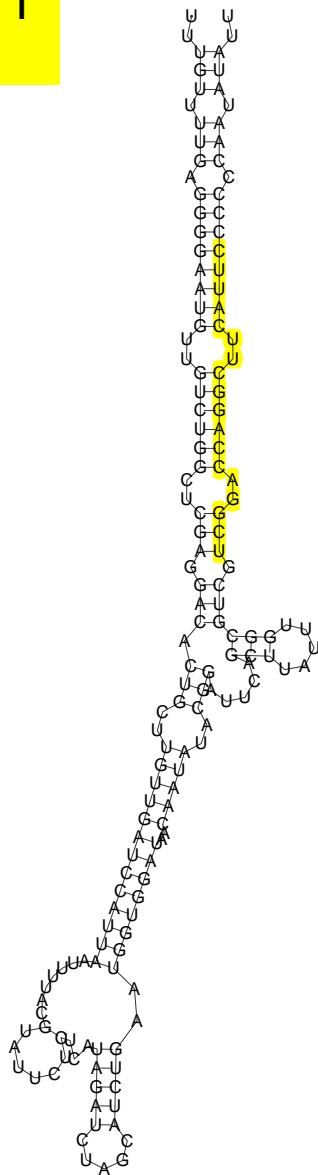



# Secondary structure II for miR166c.2

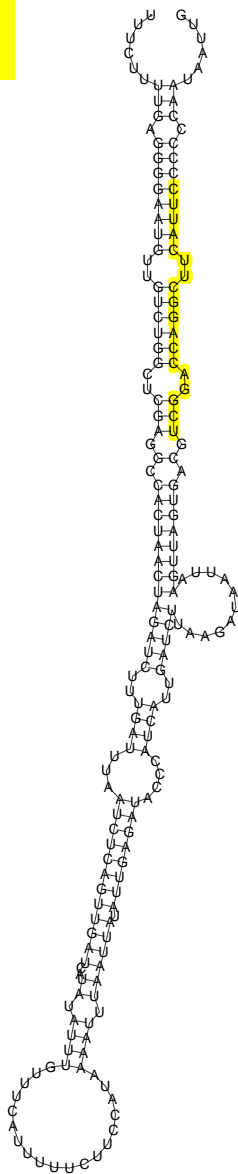

# Secondary structure III for miR166c.2

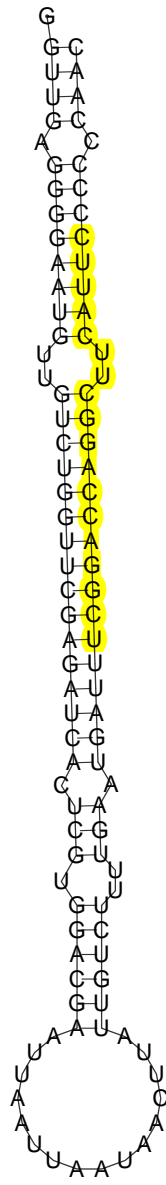



# Secondary structure I for miR166c.3

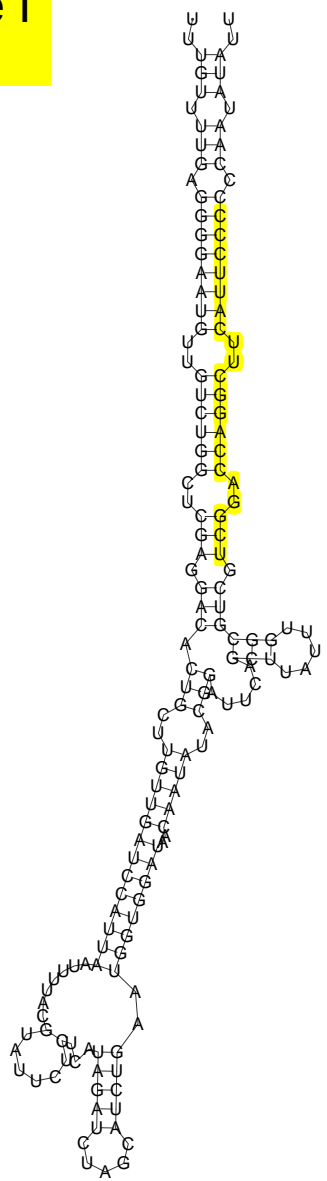

# Secondary structure II for miR166c.3

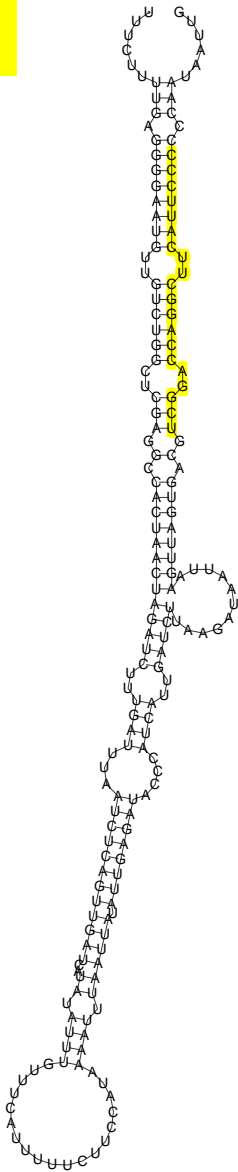



# Secondary structure IV for miR166c.3

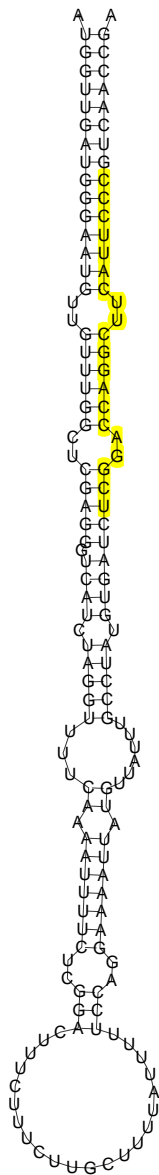

# Secondary structure for miR166c.4

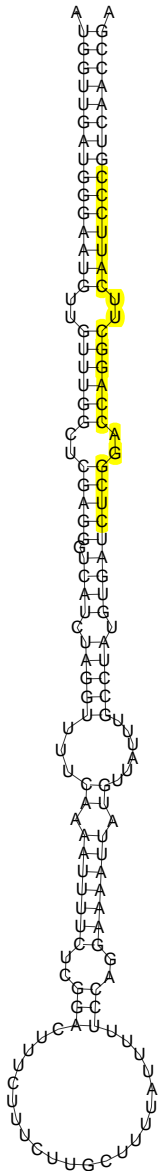













# Secondary structure for miR166j.1

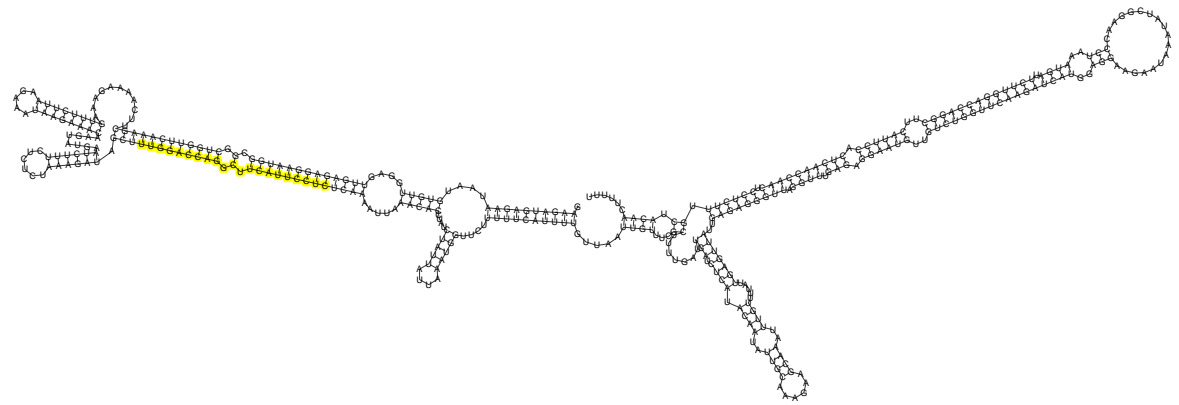

# Secondary structure for miR166j.2

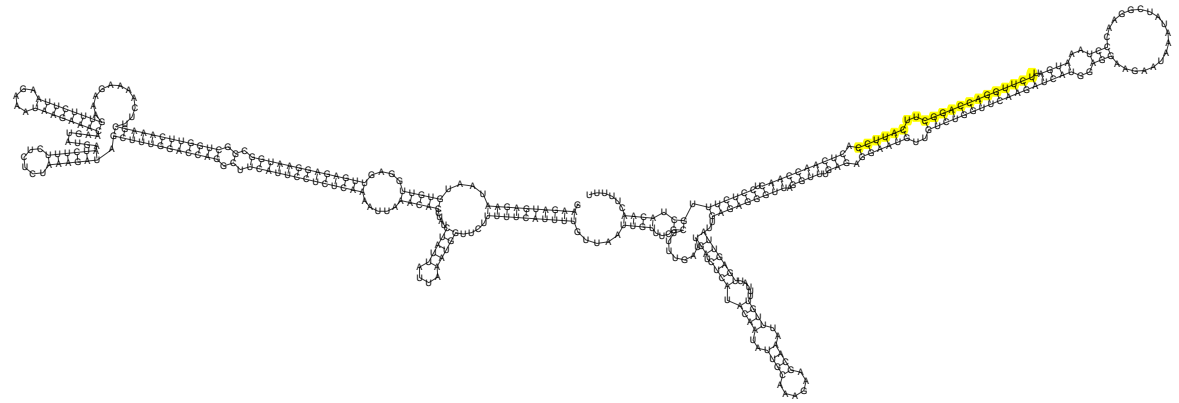

# Secondary structure for miR166j.3

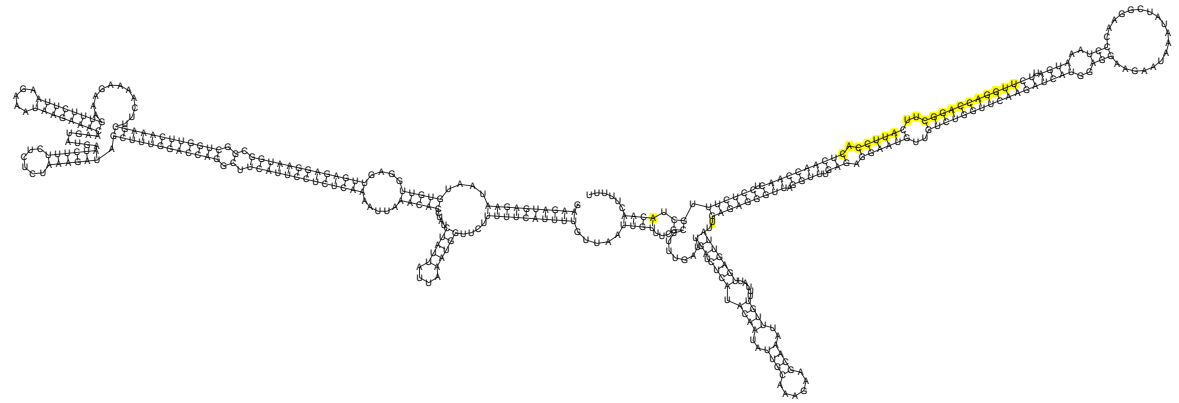







# Secondary structure for miR167b.1

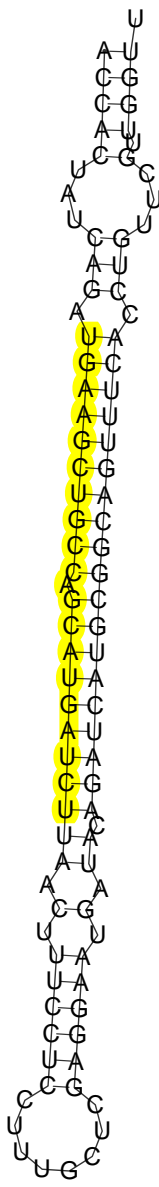







Secondary structure  
for miR167d.1

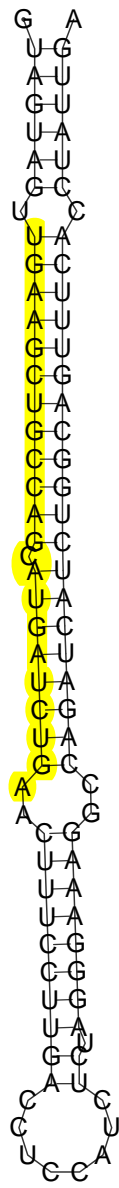

# Secondary structure for miR167d.2

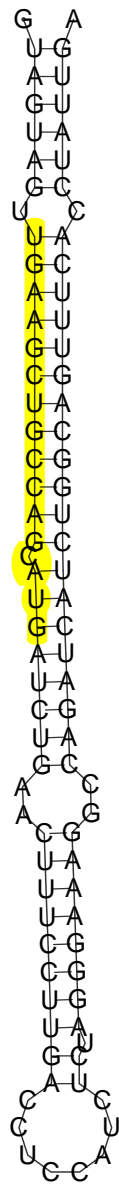











# Secondary structure I for miR169b.1-3p

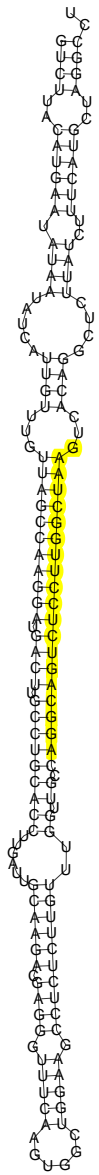



Secondary structure III  
for miR169b.1-3p

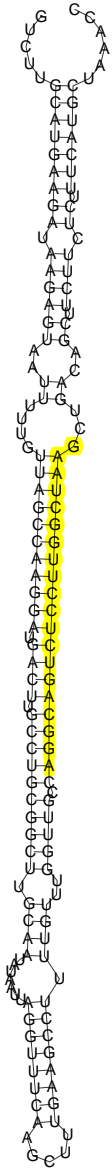

# Secondary structure I for miR169i.1

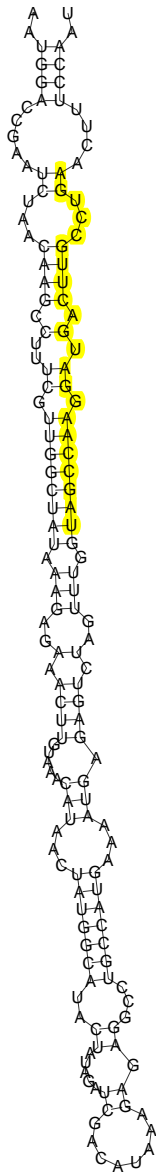



# Secondary structure II for miR169i.1

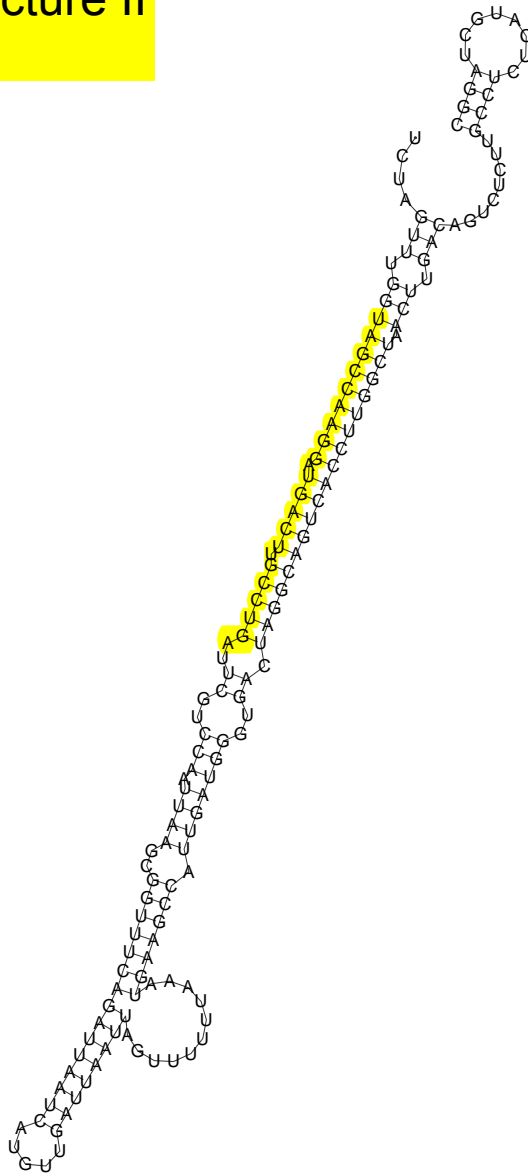





Secondary structure I  
for miR169m.1

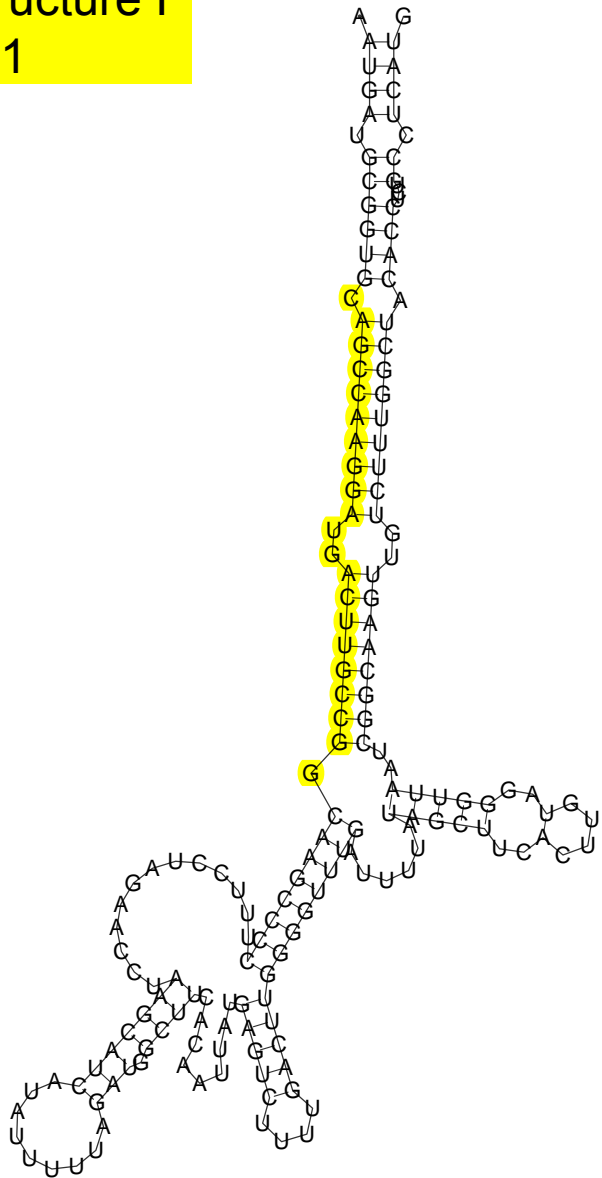

# Secondary structure II for miR169m.1

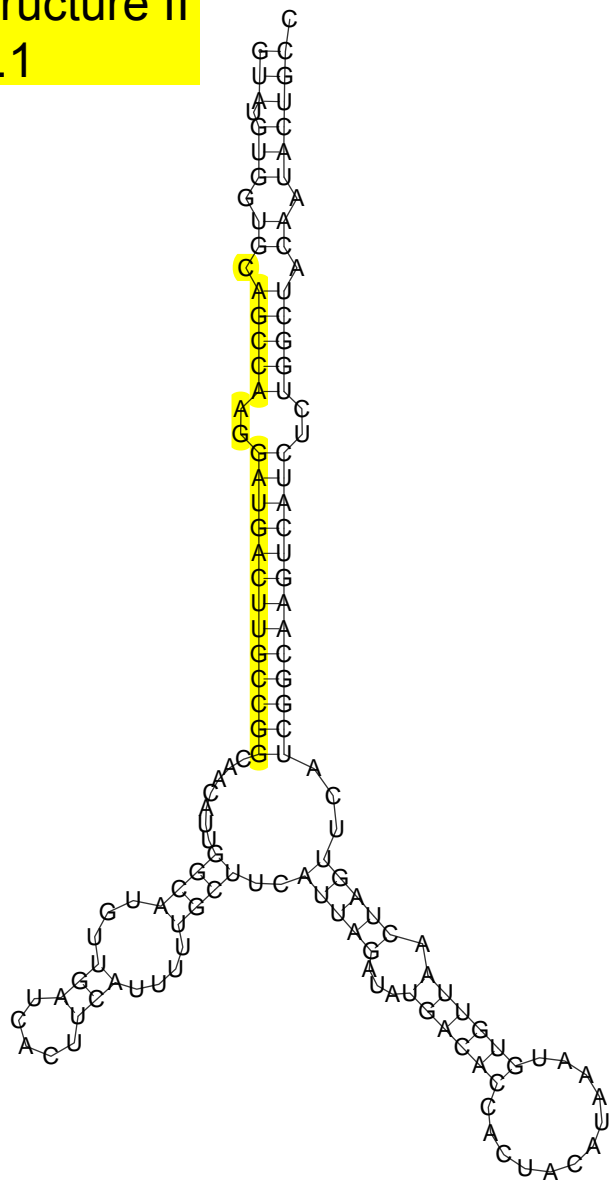

# Secondary structure I for miR169m.2

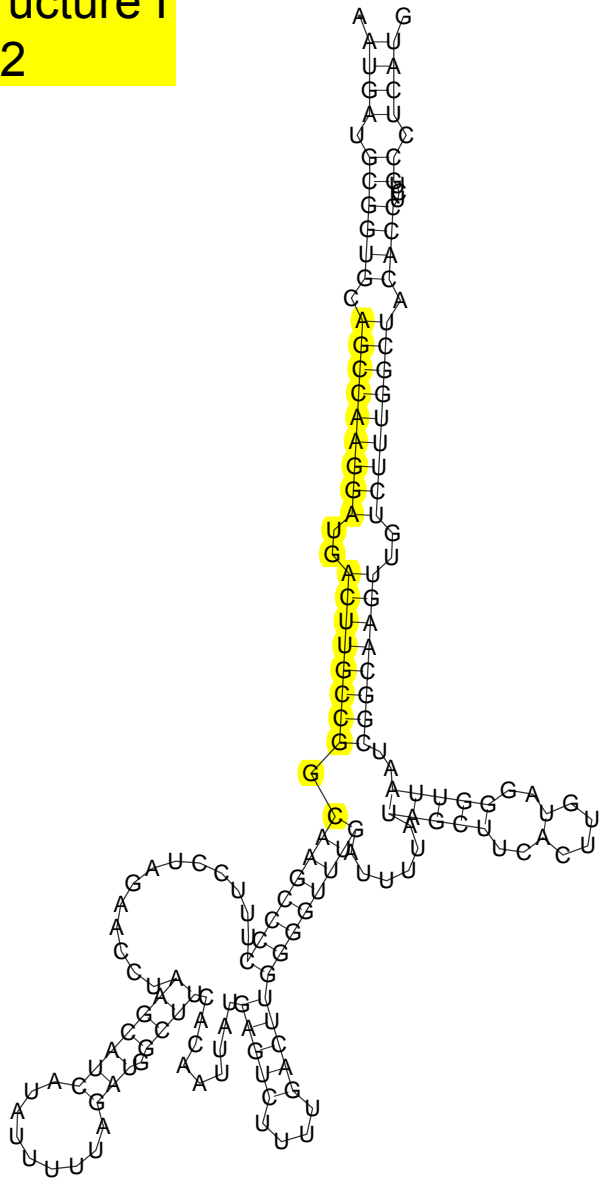

Secondary structure II  
for miR169m.2

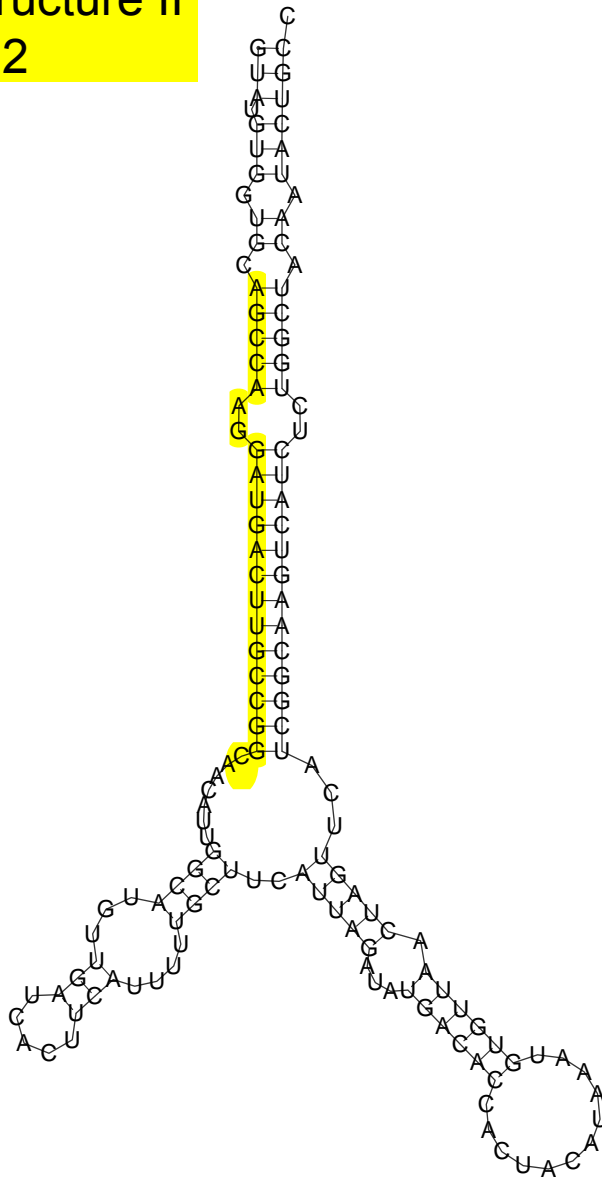













# Secondary structure I for miR171g.1

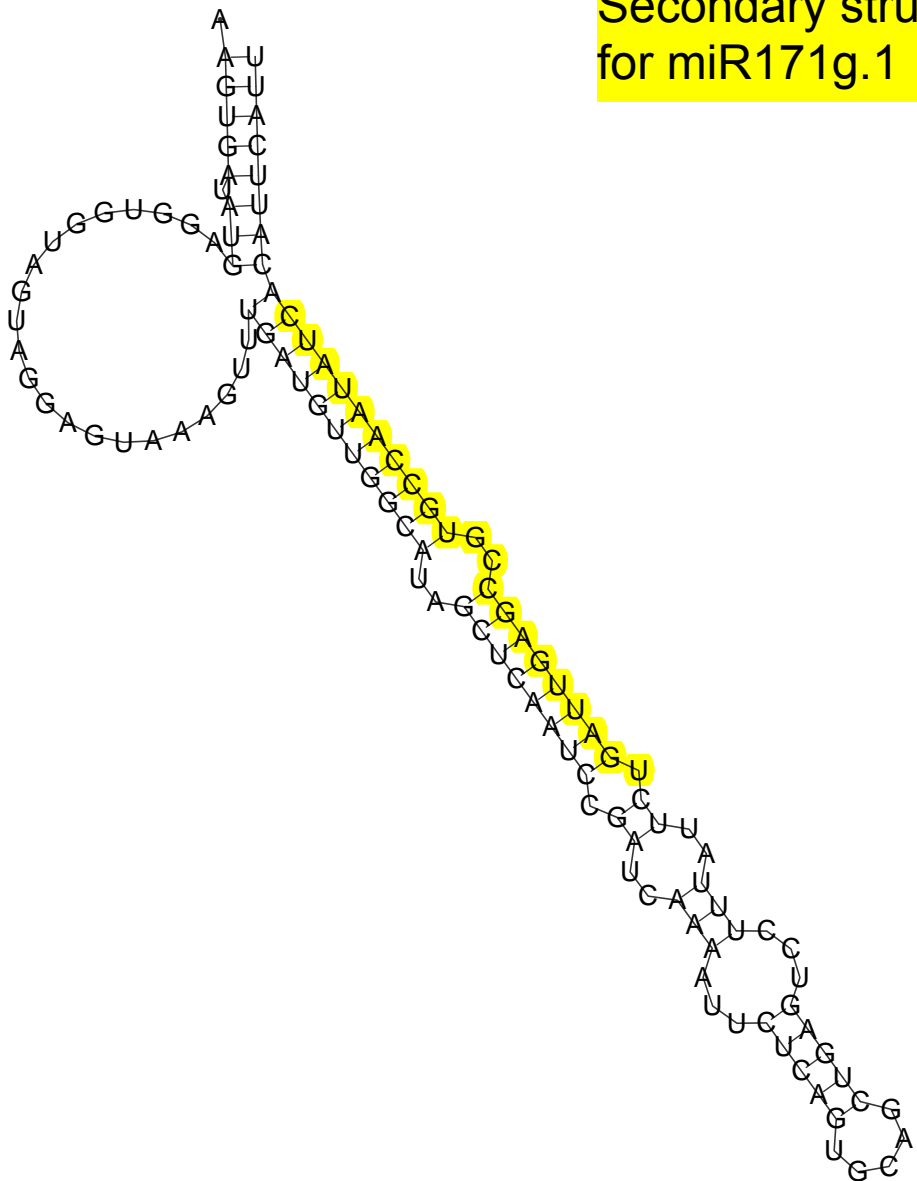

# Secondary structure II for miR171g.1

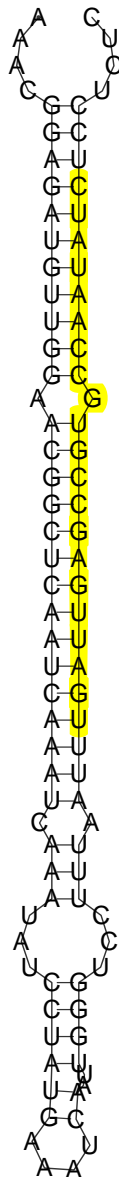







Secondary structure I  
for miR172a-3p.1

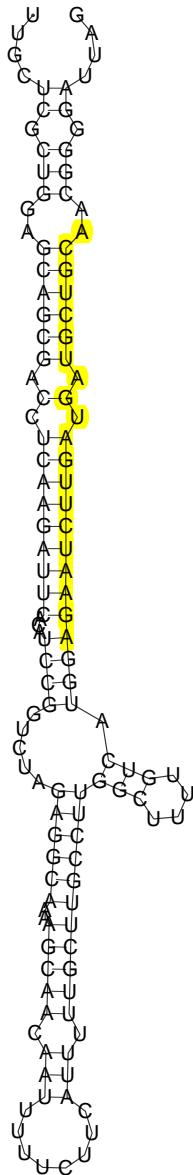

Secondary structure II  
for miR172a-3p.1

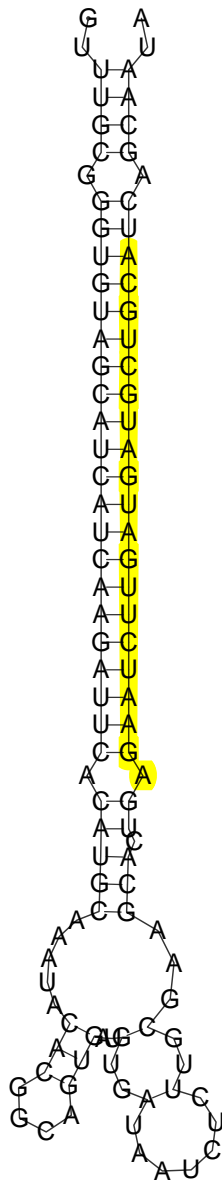



# Secondary structure for miR172a-3p.3

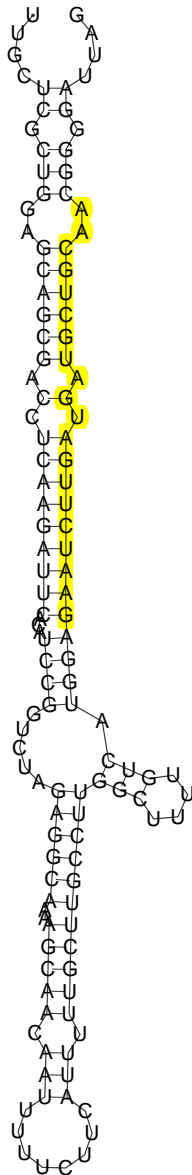

# Secondary structure for miR172c.1

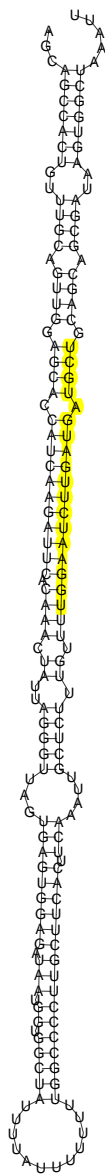













Secondary structure  
for miR172k

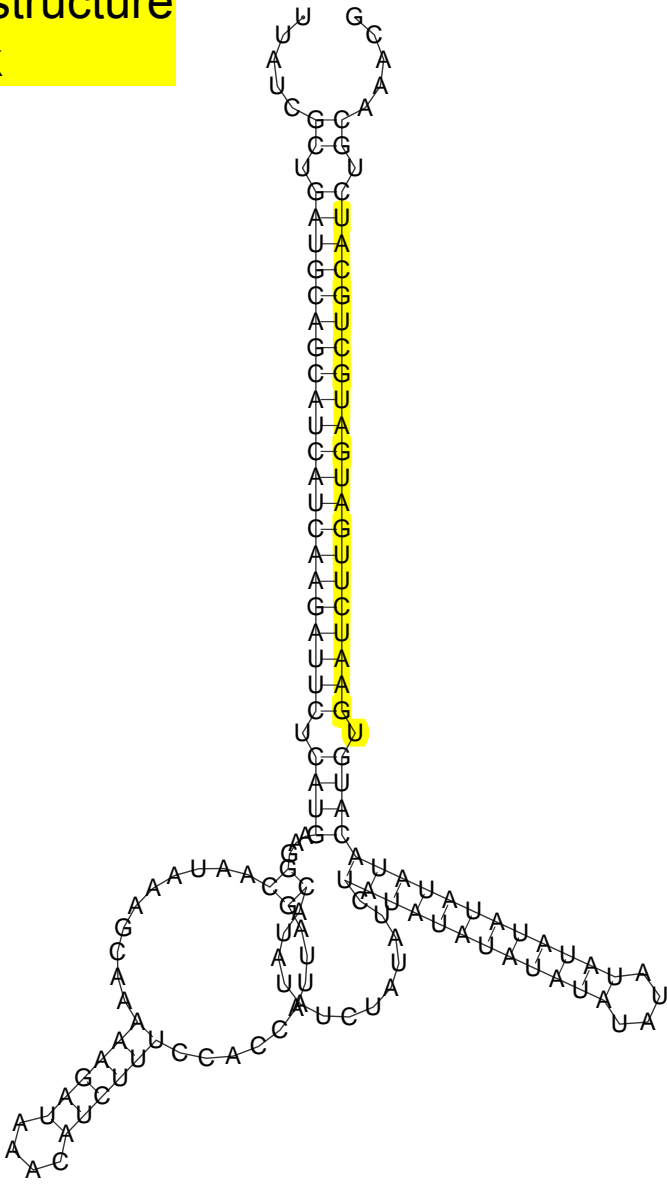



# Secondary structure for miR2118.1

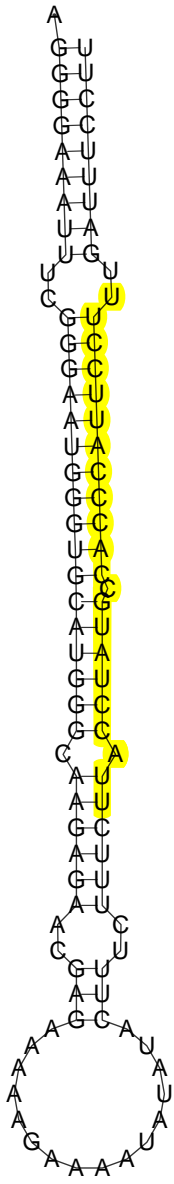



# Secondary structure for miR2275a

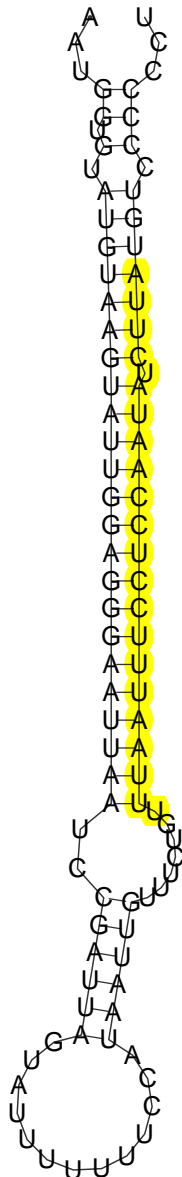





# Secondary structure for miR2275c.1

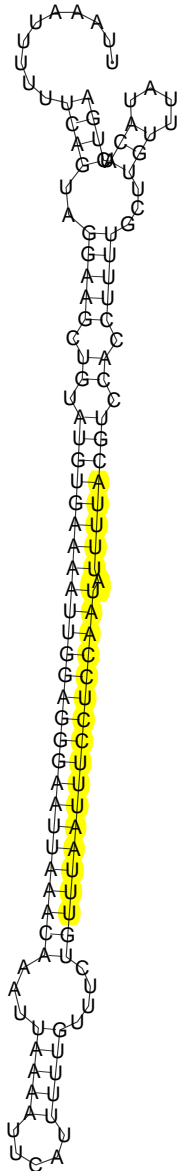

Secondary structure I  
for miR2275d

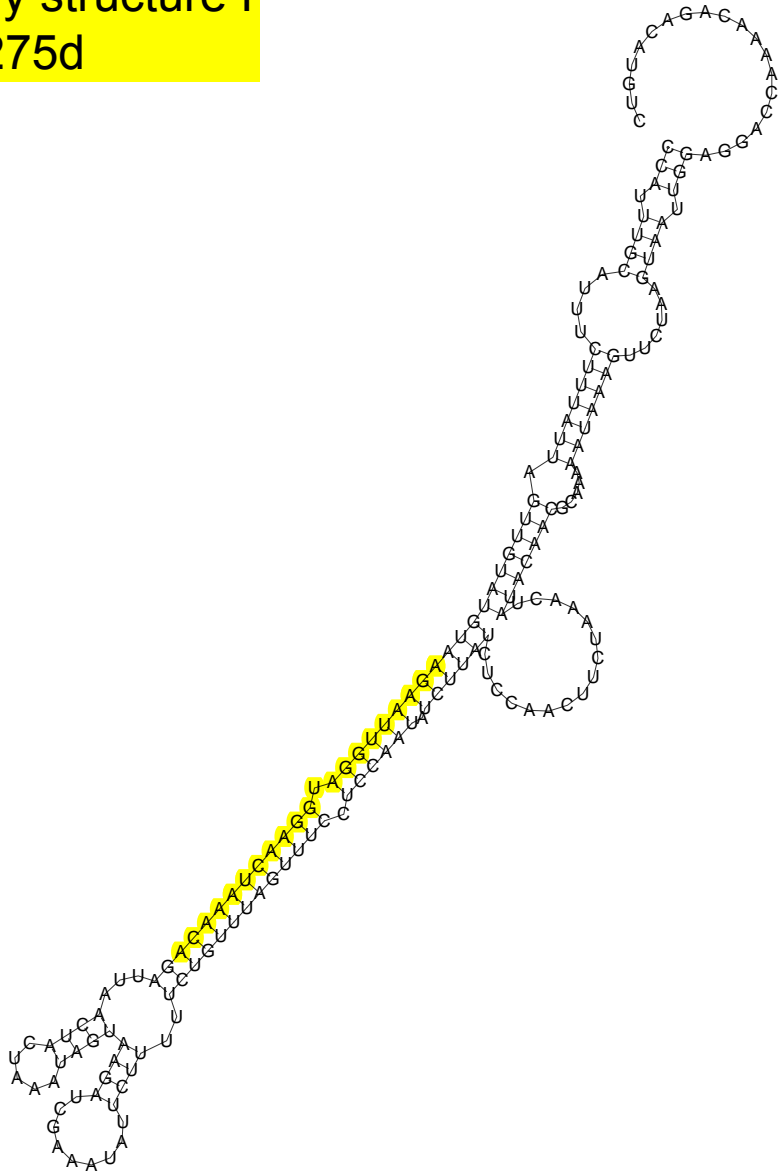









# Secondary structure for miR2275f

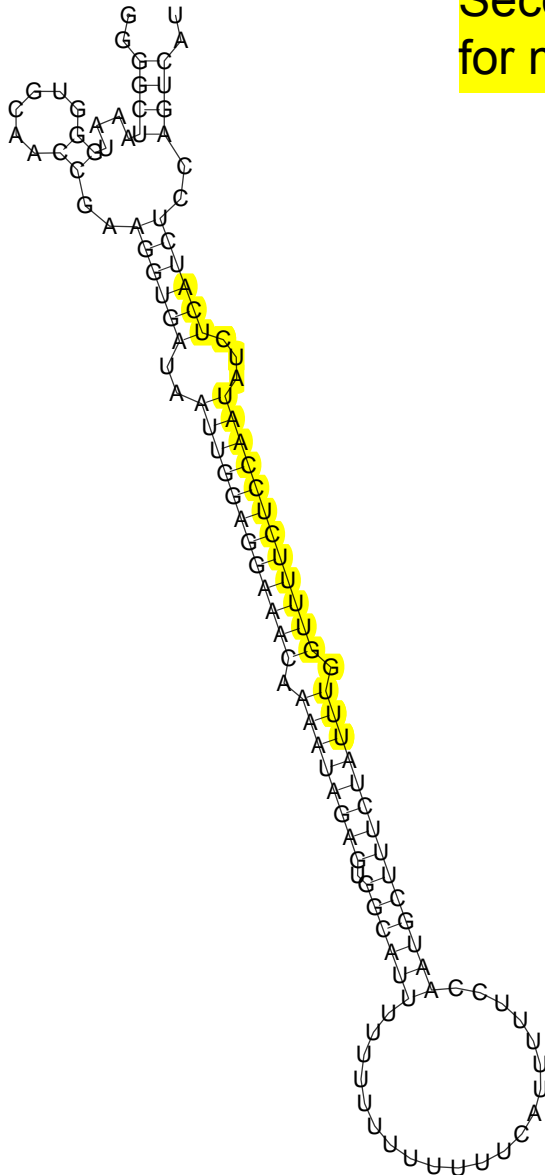

# Secondary structure for miR2911

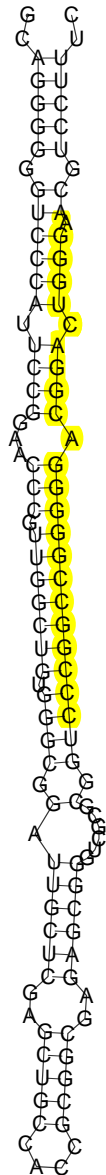





# Secondary structure for miR319a

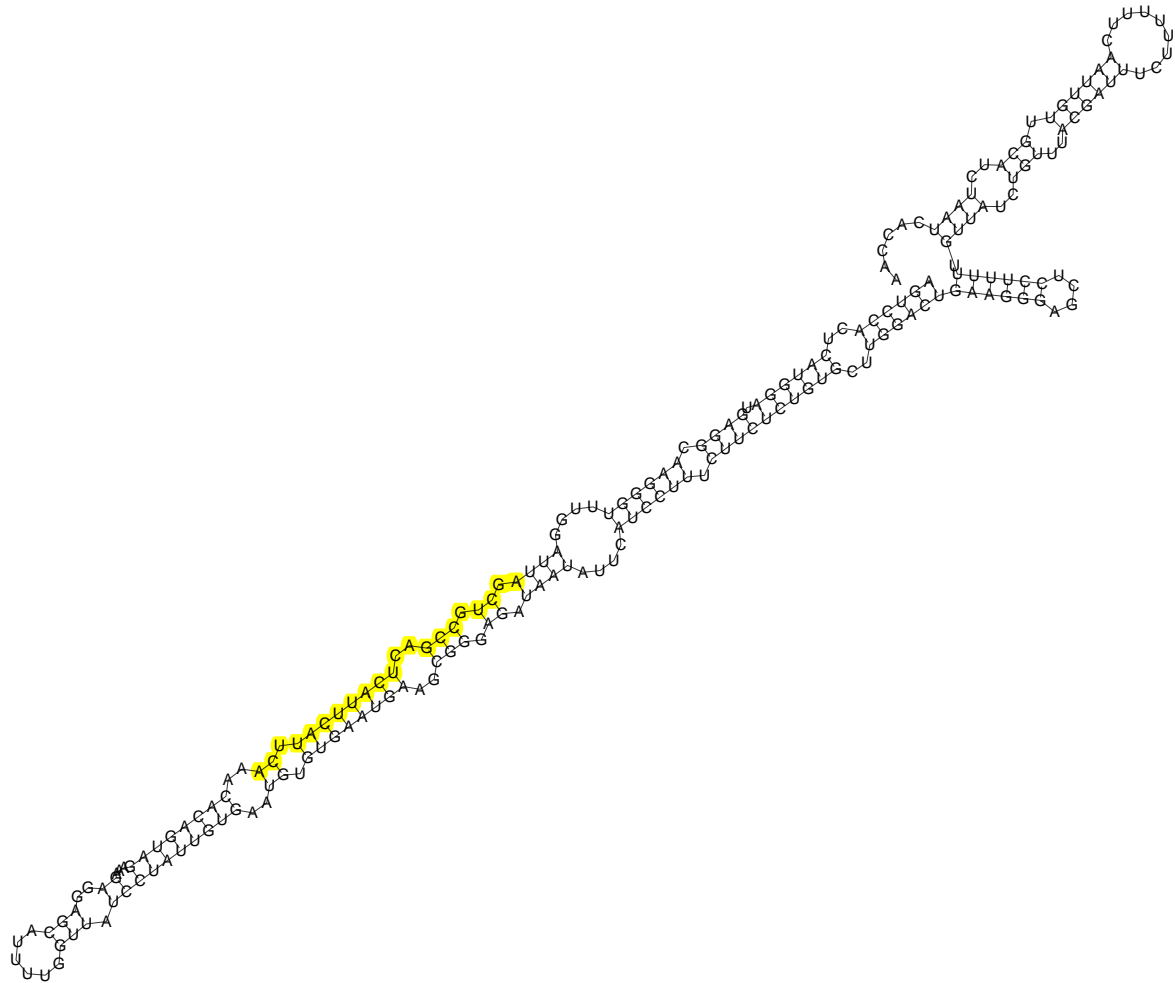





# Secondary structure II for miR390.1

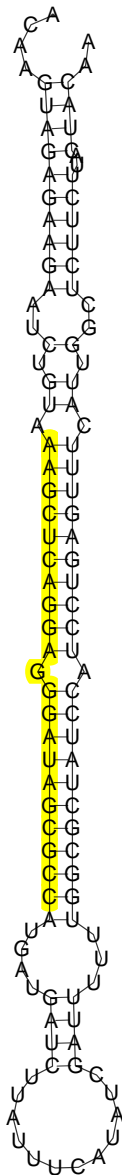



# Secondary structure I for miR390.2

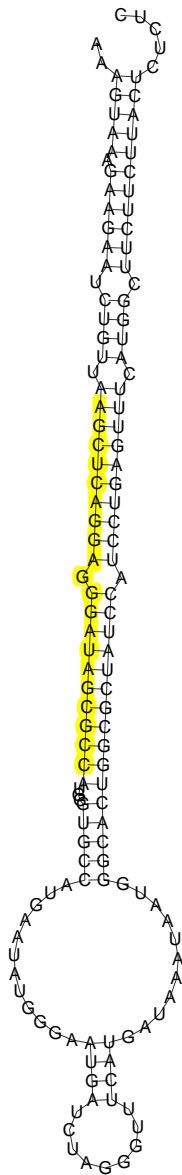

# Secondary structure II for miR390.2

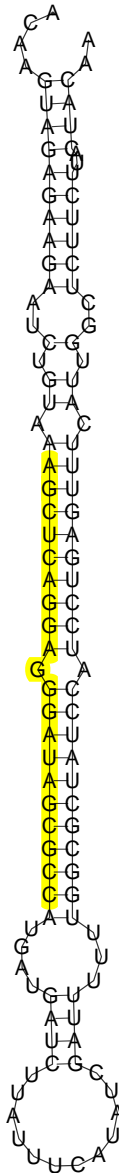



# Secondary structure III for miR390.2

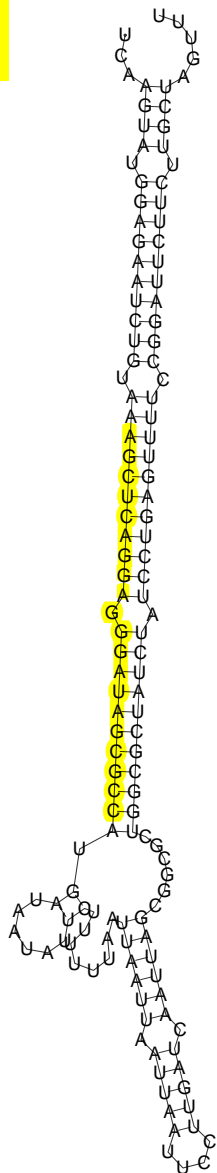



Secondary structure II  
for miR390-3p.1

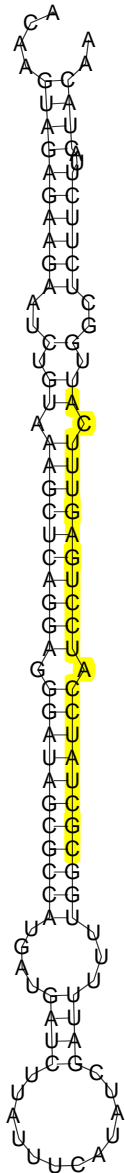



# Secondary structure II for miR390-3p.2

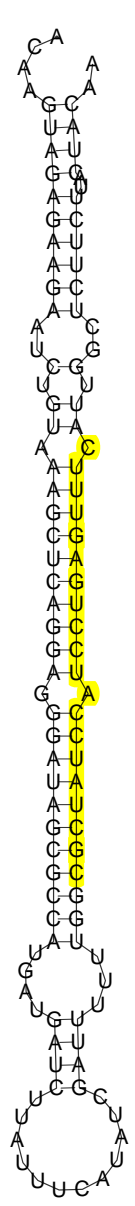











# Secondary structure for miR391b

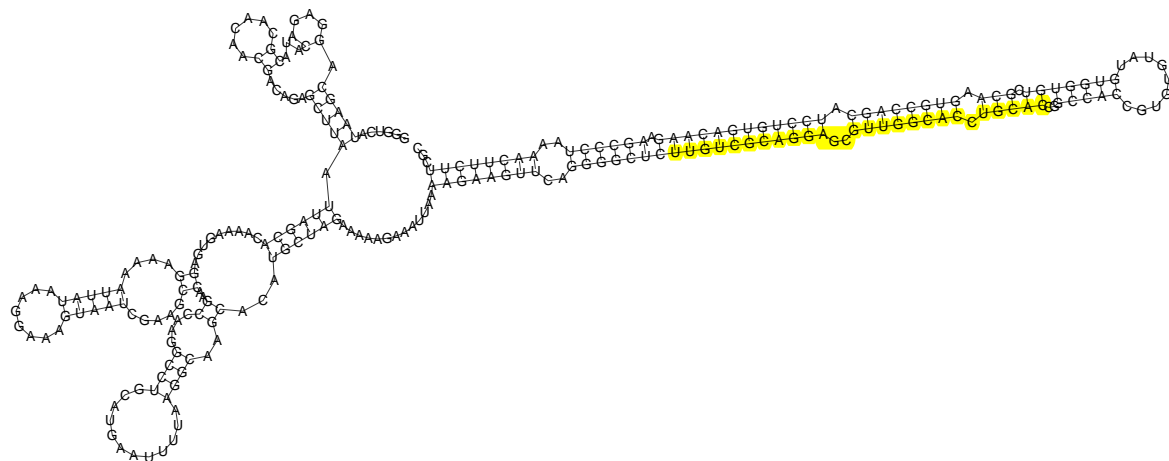

# Secondary structure for miR393a.1

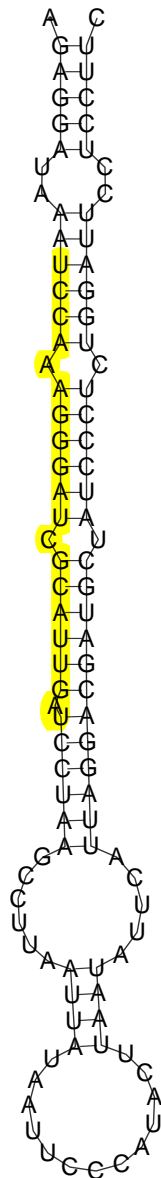

# Secondary structure for miR393a.2

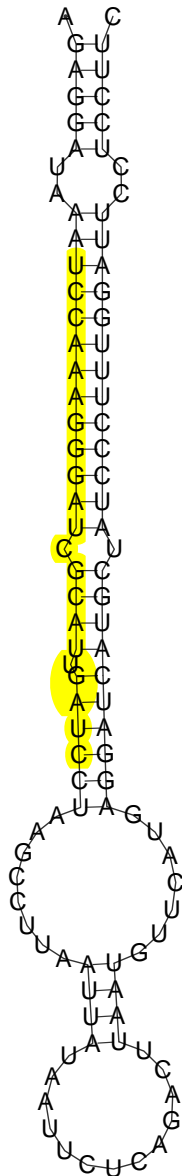

# Secondary structure for miR393a.2-3p

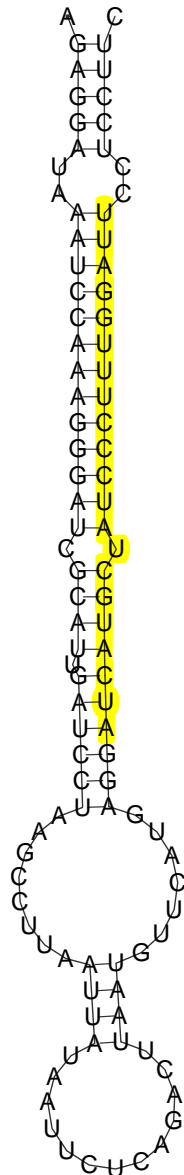

# Secondary structure for miR393a.3

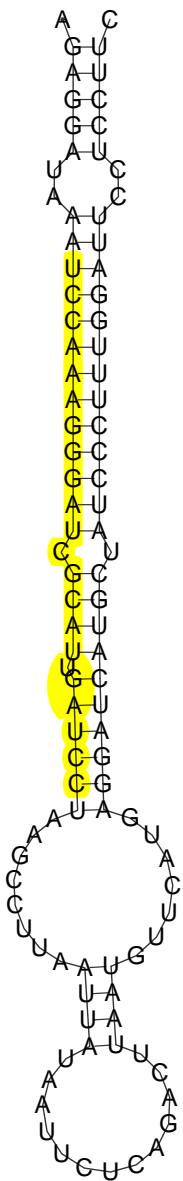

Secondary structure for miR393b

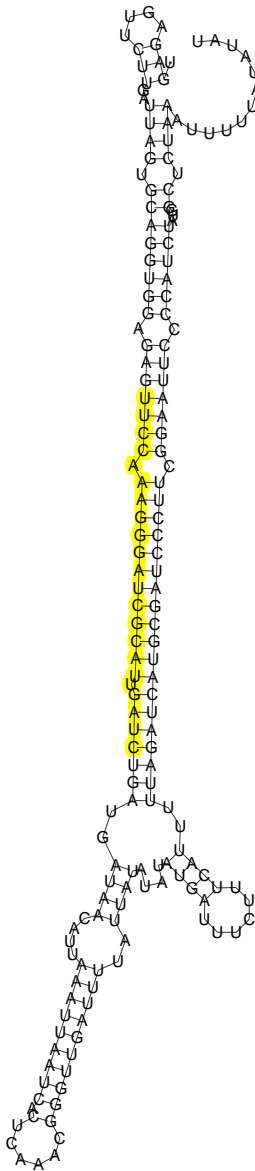

# Secondary structure for miR393b-3p

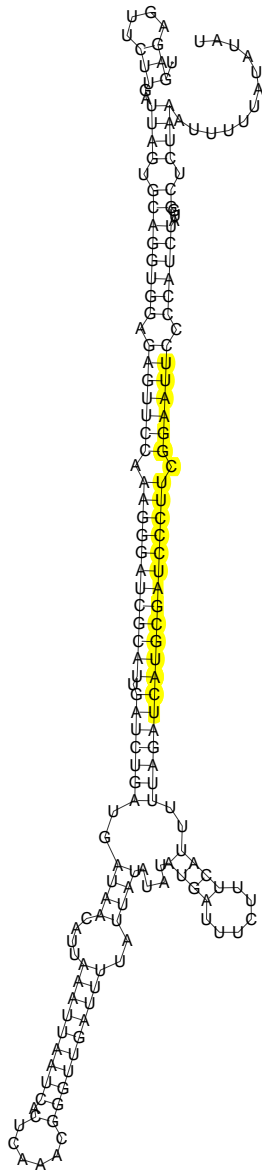





# Secondary structure for miR394-3p.1

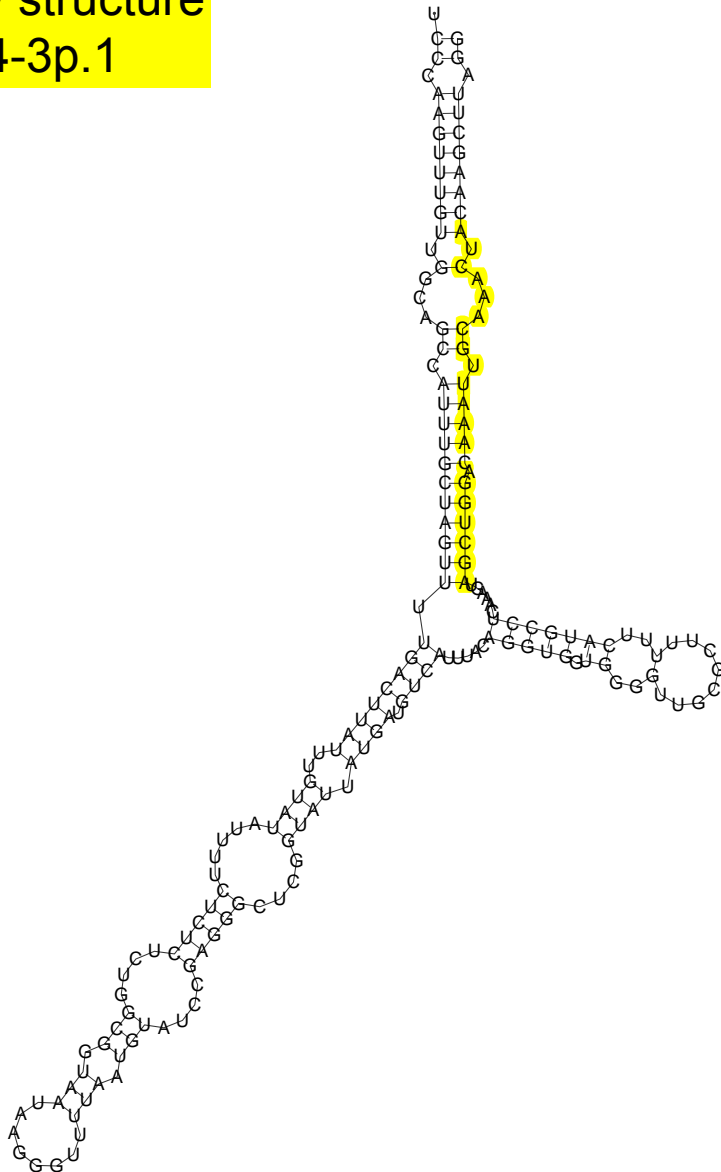

# Secondary structure for miR394-3p.2

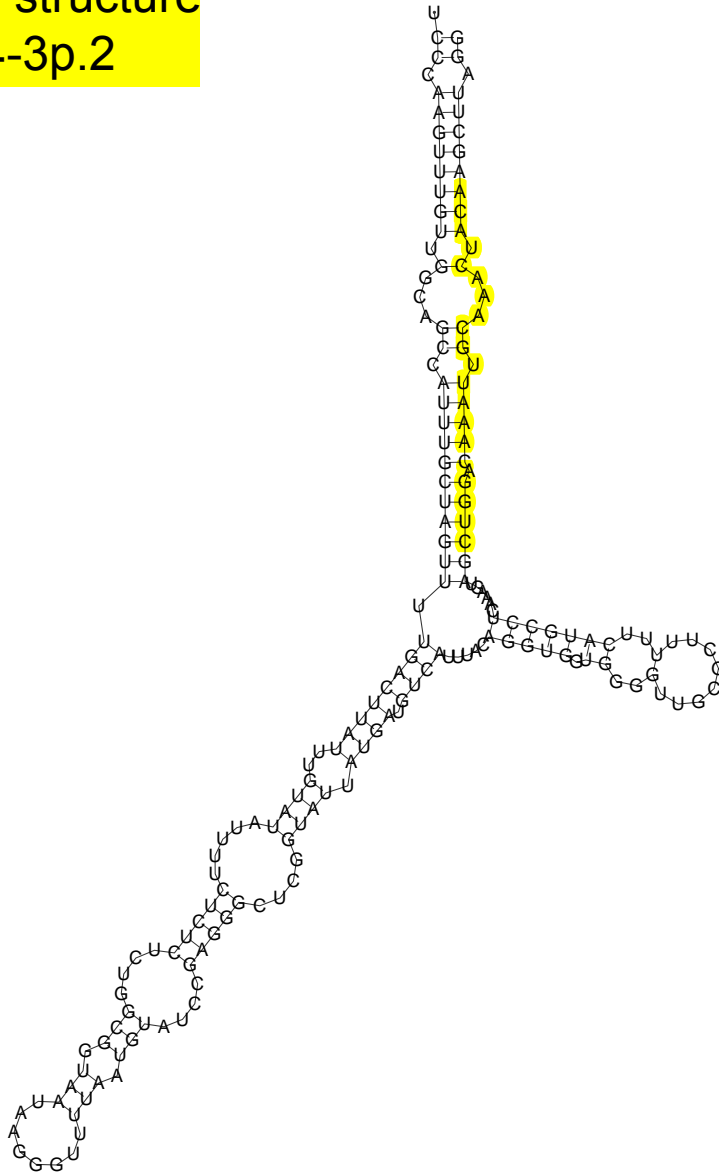

# Secondary structure for miR394-3p.3

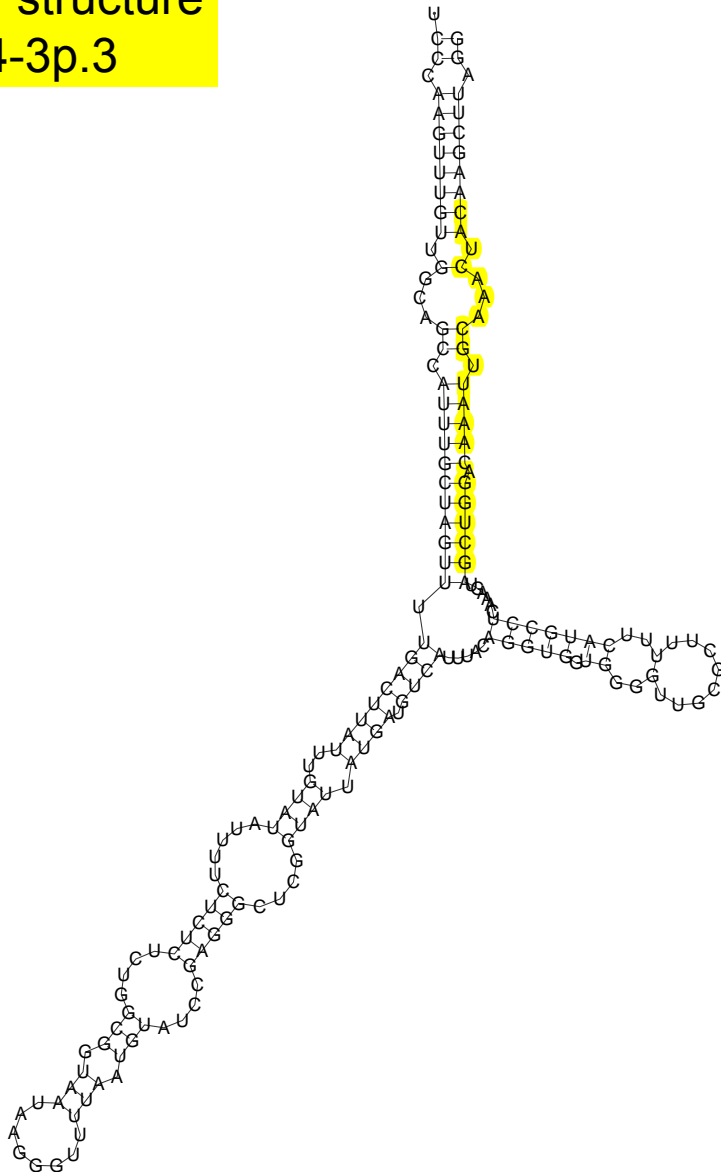

# Secondary structure I for miR395.1

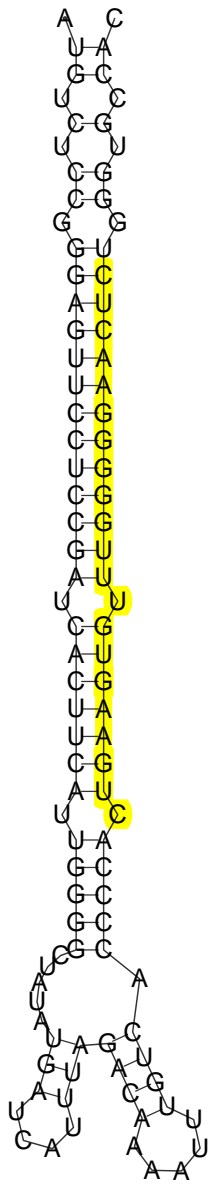

# Secondary structure II for miR395.1

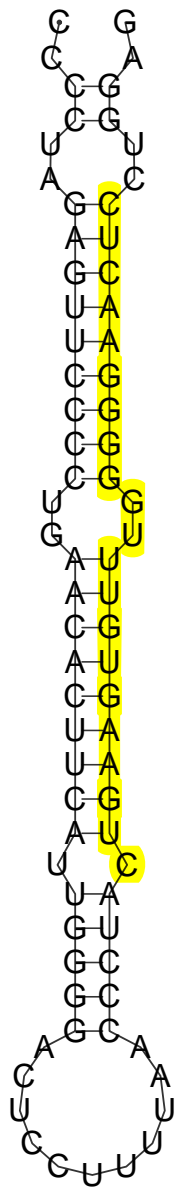



# Secondary structure IV for miR395.1

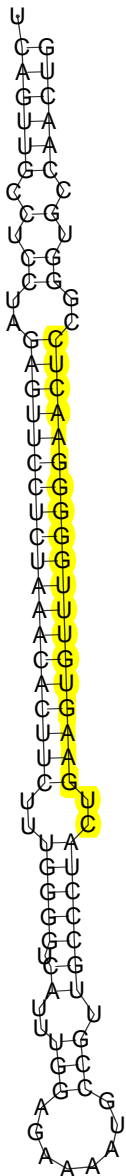



# Secondary structure V for miR395.1

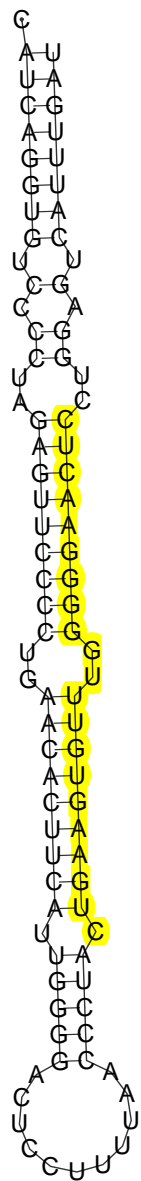



# Secondary structure II for miR395.2

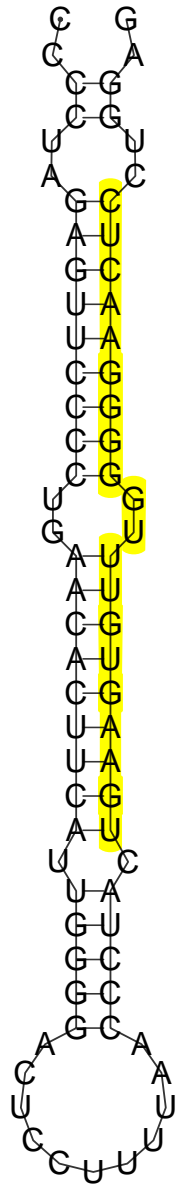



# Secondary structure IV for miR395.2

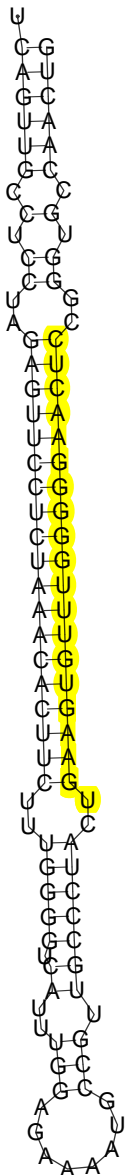

# Secondary structure V for miR395.2

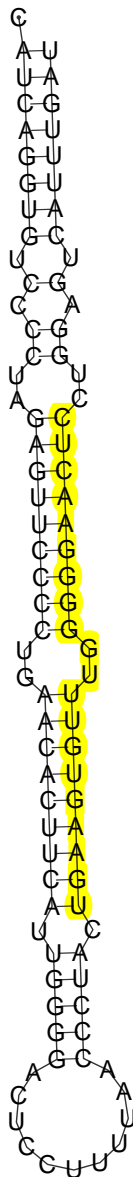







# Secondary structure for miR3952.1

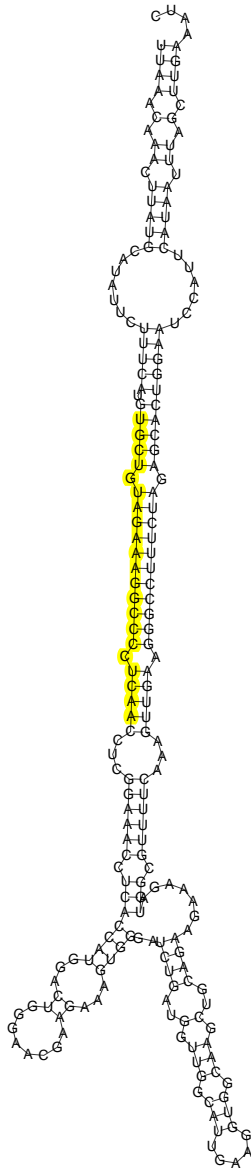

# Secondary structure for miR3952.2

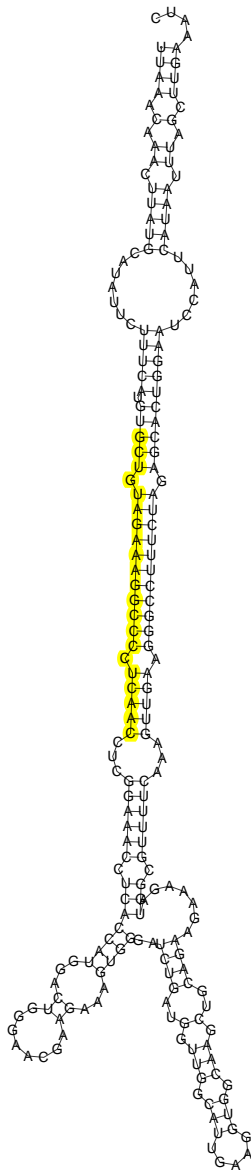

# Secondary structure II for miR3952-3p

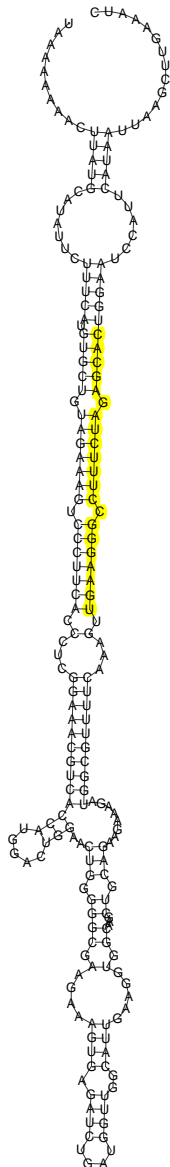

Secondary structure I  
for miR3952-3p

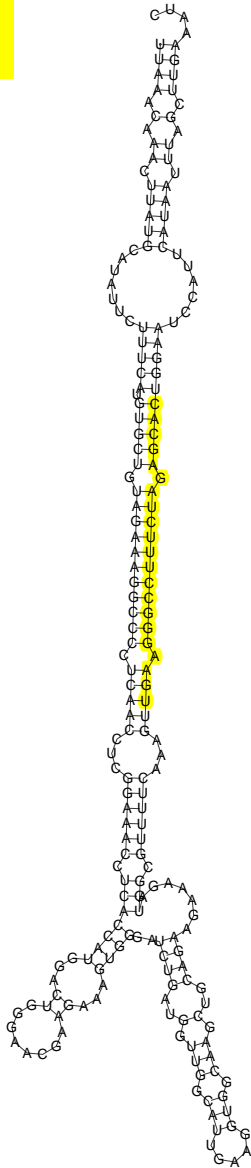

# Secondary structure for miR3954a

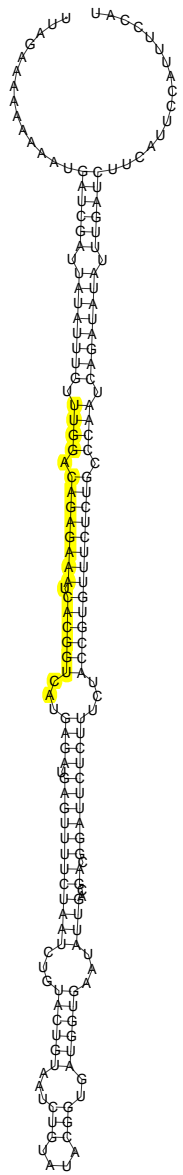





# Secondary structure II for miR396a

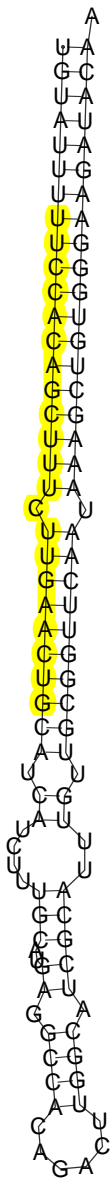











# Secondary structure II for miR396b.2

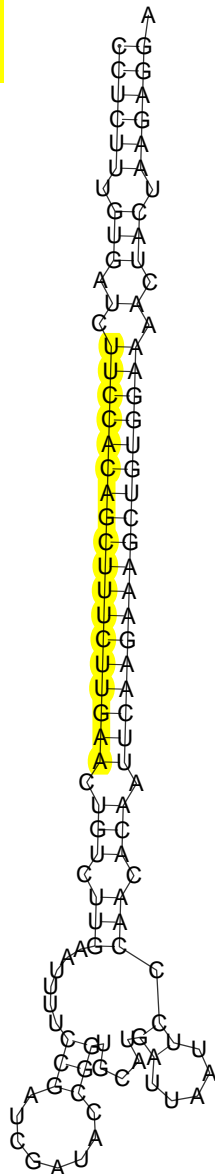



# Secondary structure I for miR396b.3

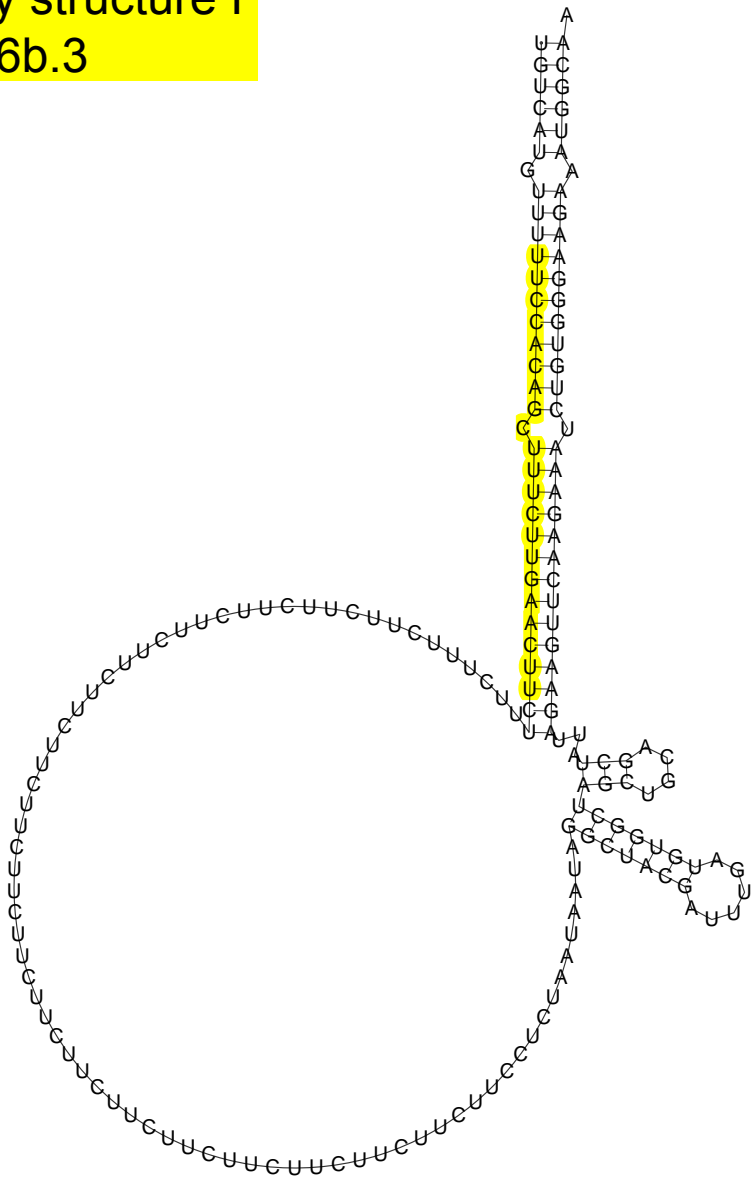











# Secondary structure II for miR396c

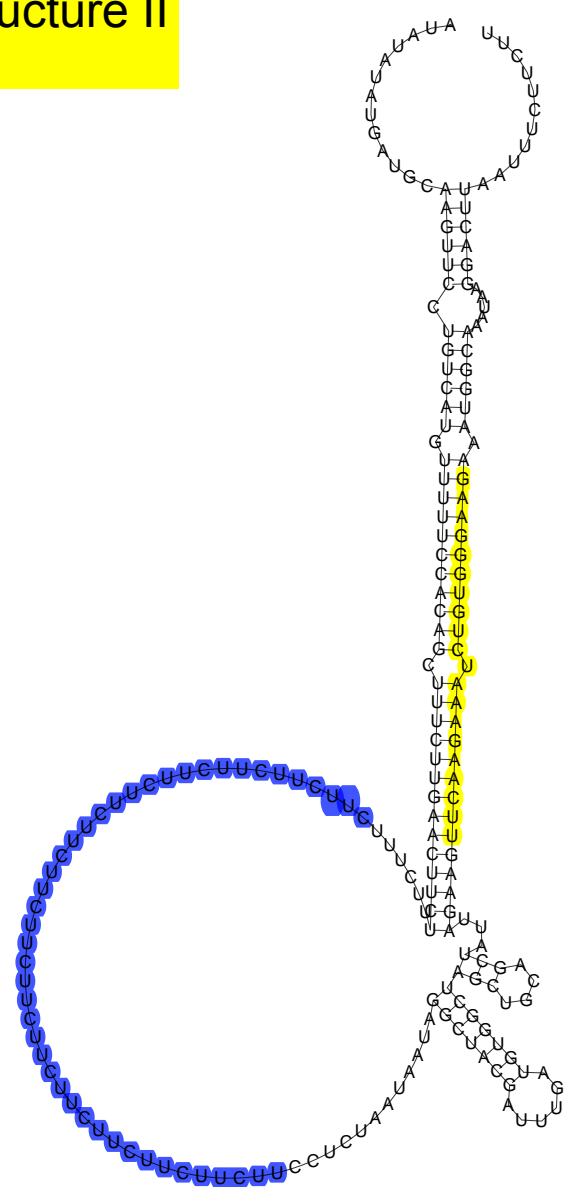

# Secondary structure III for miR396c

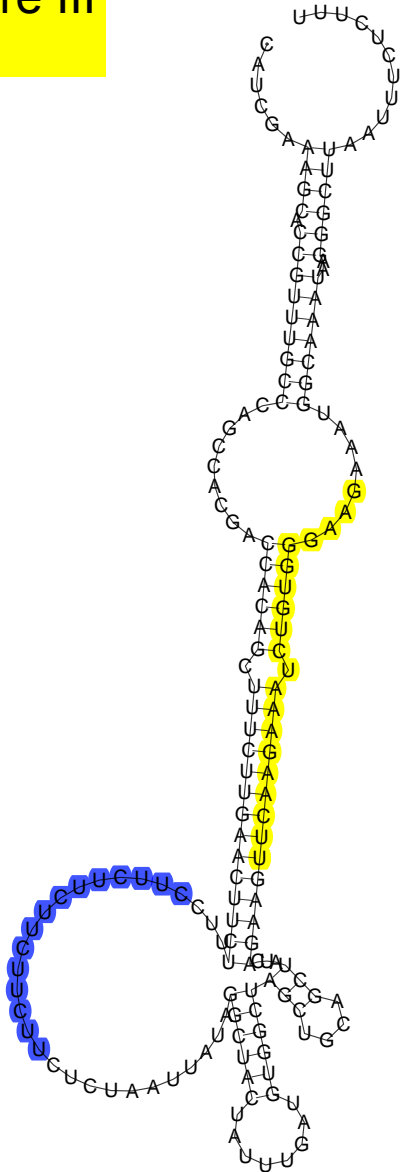

Secondary structure IV  
for miR396c

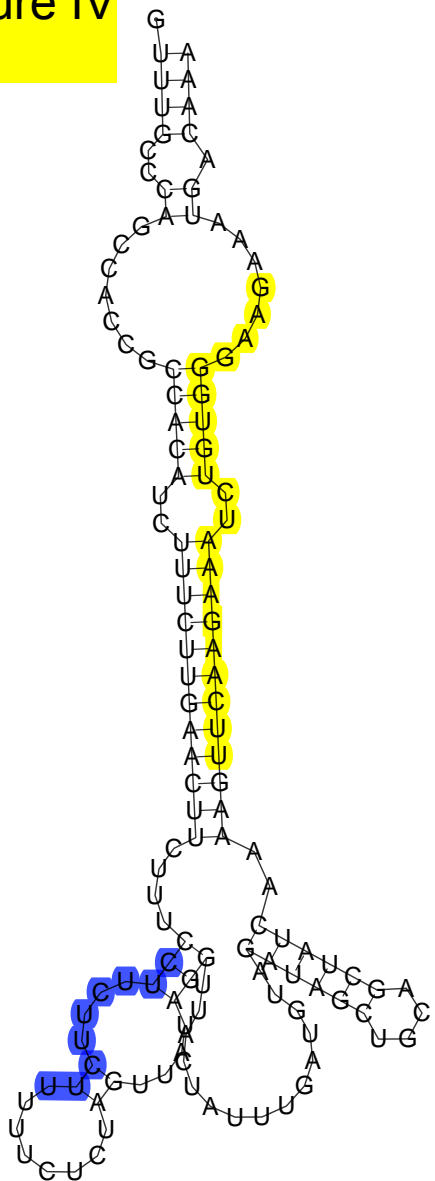









# Secondary structure for miR396d.4

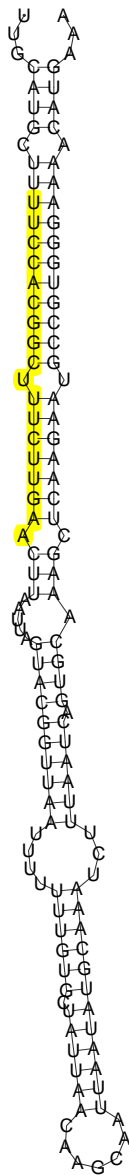







# Secondary structure for miR398b

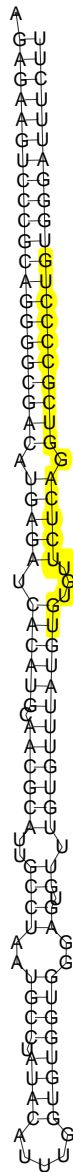

# Secondary structure I for miR399a

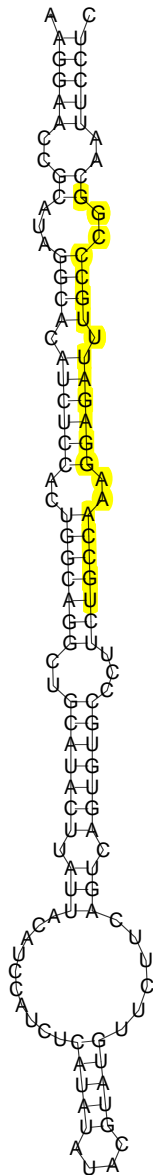

# Secondary structure II for miR399a

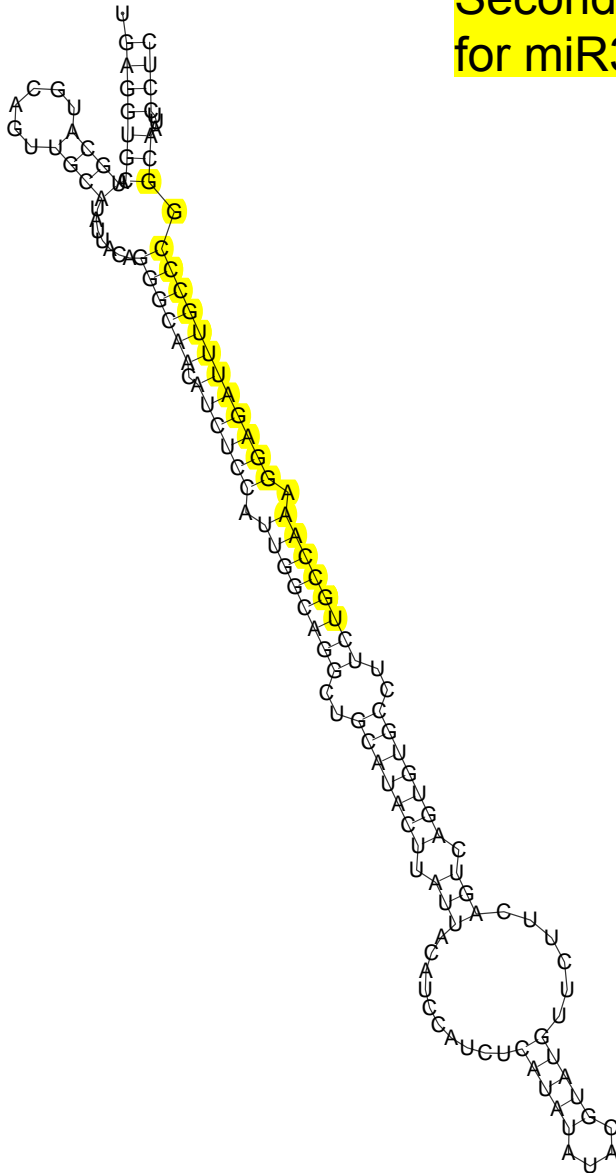



# Secondary structure for miR399b

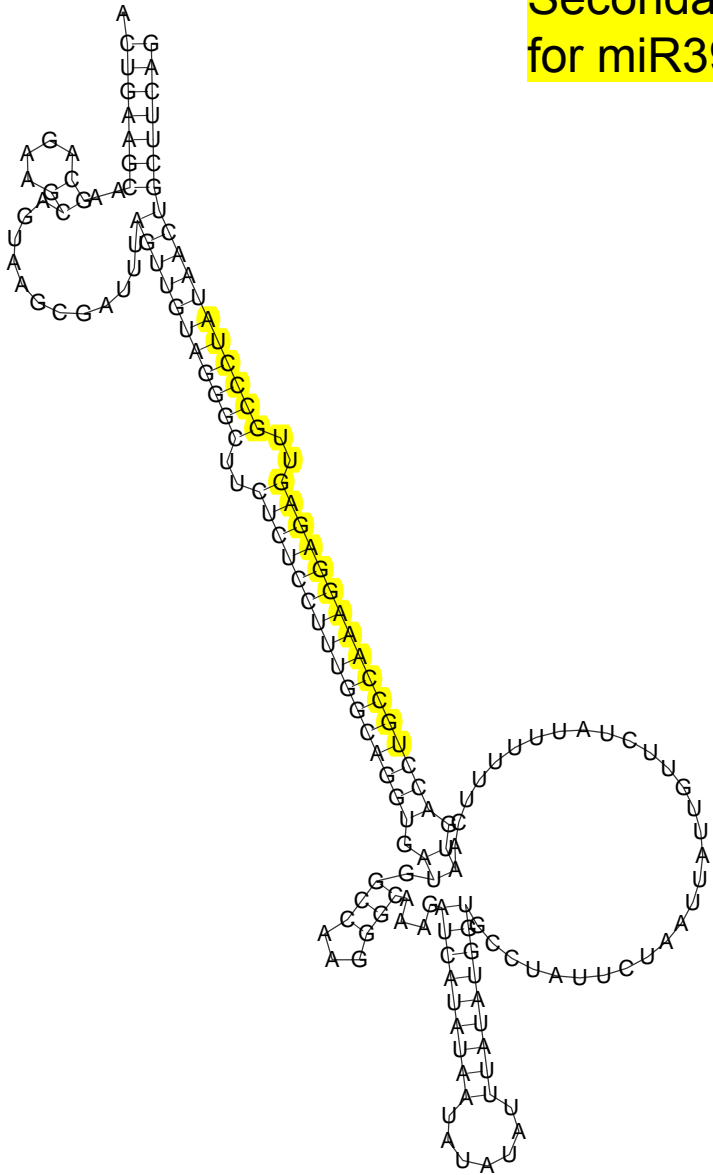





# Secondary structure for miR399e

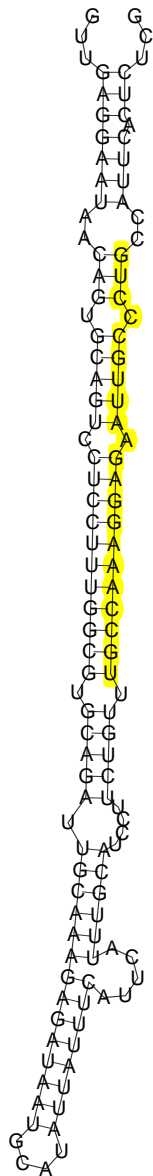





Secondary structure II  
for miR403.1

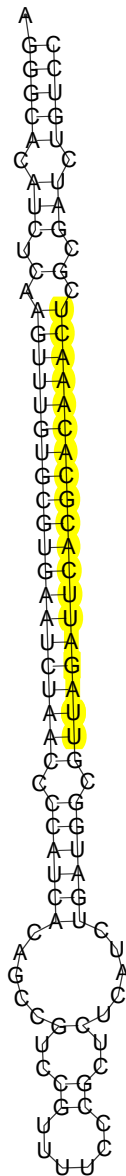





# Secondary structure II for miR403.2

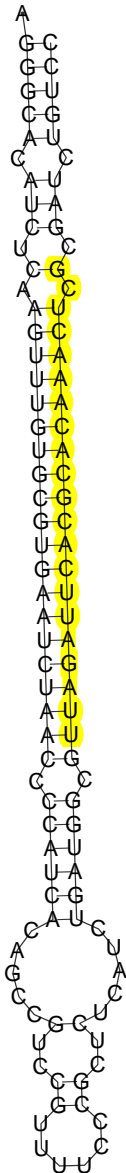



# Secondary structure II for miR403.3

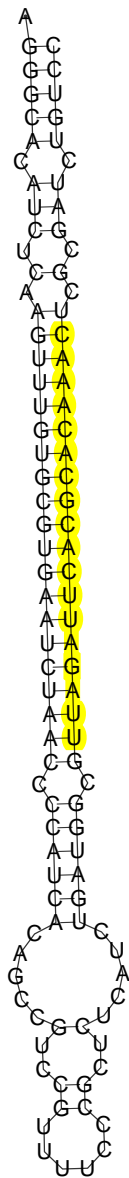



# Secondary structure for miR408.2

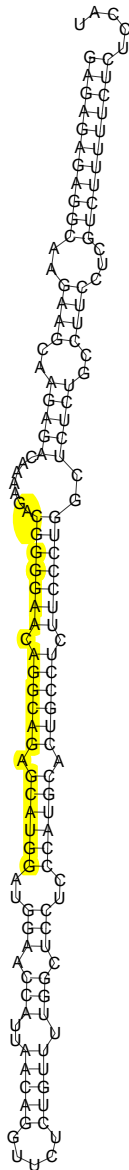









# Secondary structure for miR443b.1

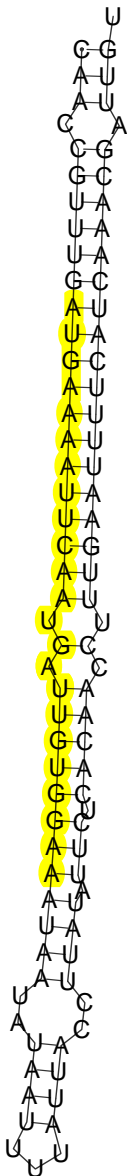

# Secondary structure for miR443b.2

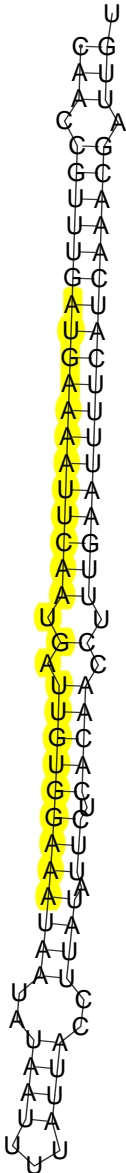

# Secondary structure for miR444a.1

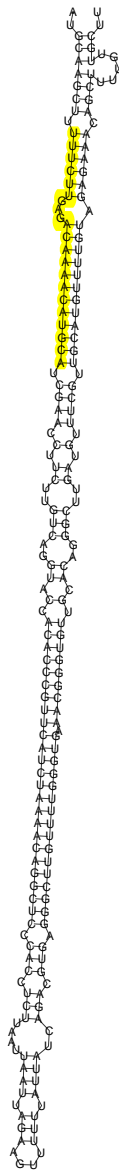

# Secondary structure for miR444a.2

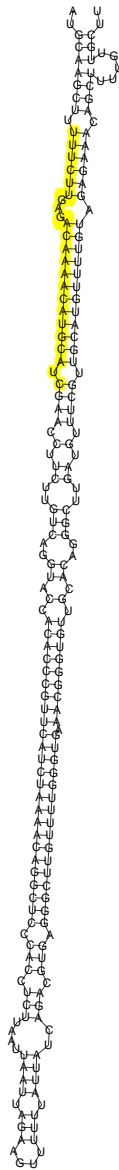











# Secondary structure for miR477a.2

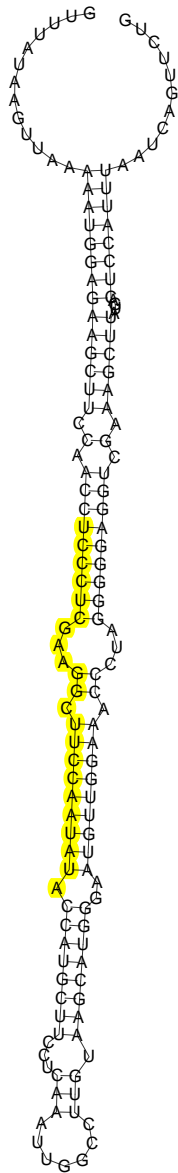



# Secondary structure for miR477b.2

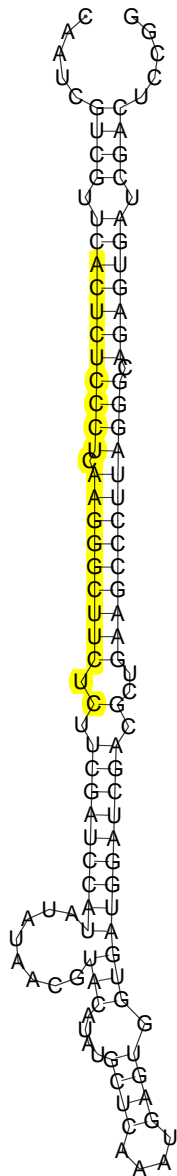

# Secondary structure for miR477d.1-3p

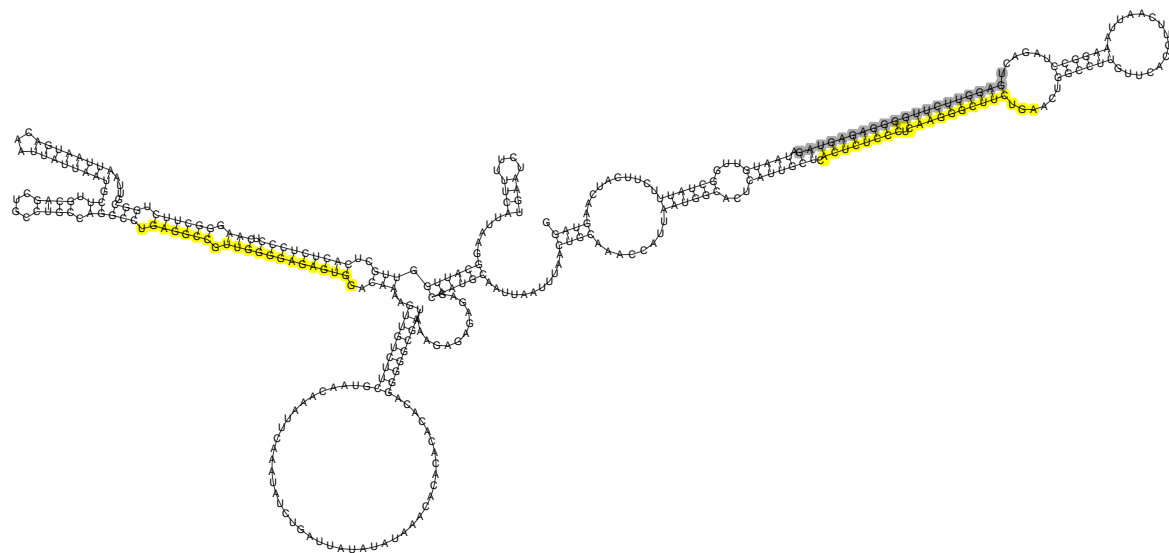

# Secondary structure for miR477d.2-5p

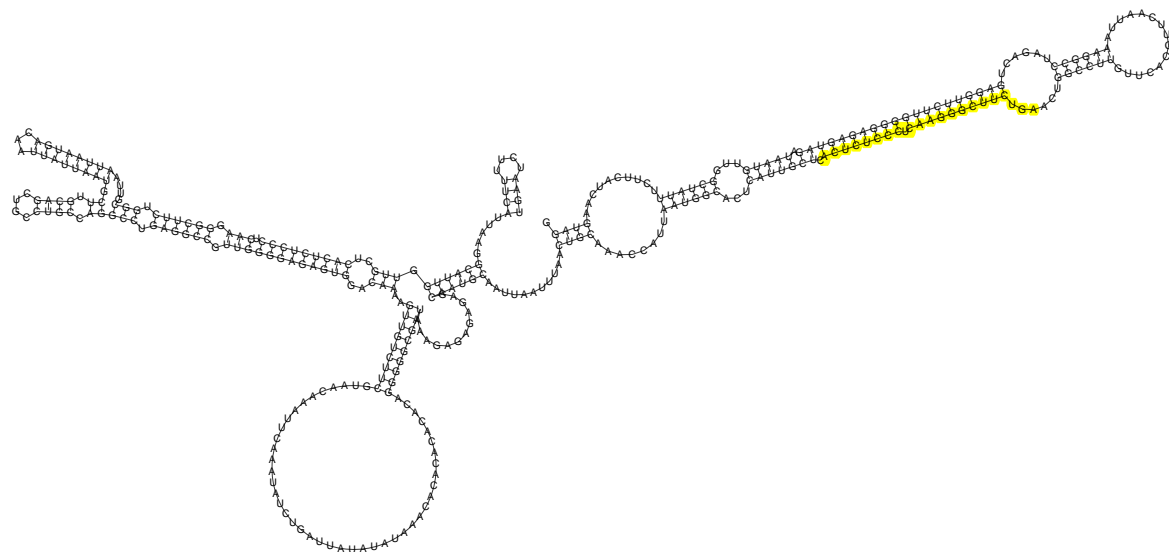



Secondary structure  
for miR479.2

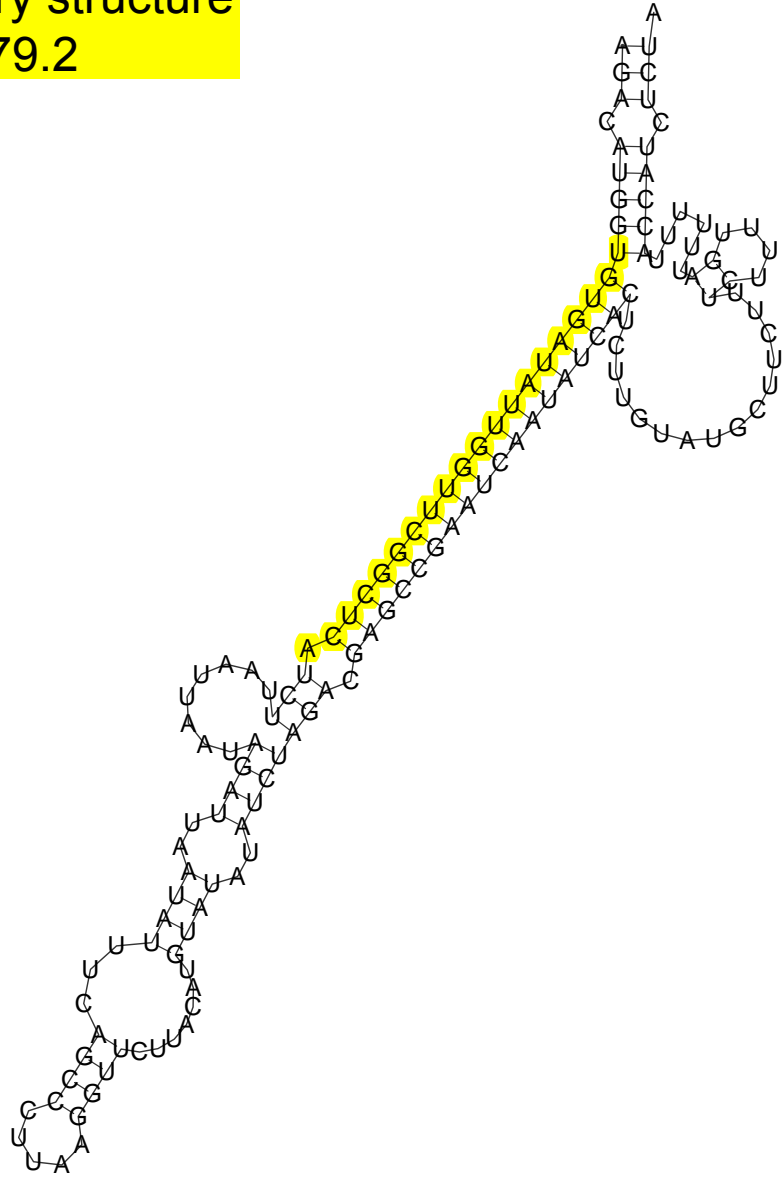

# Secondary structure for miR482a-3p

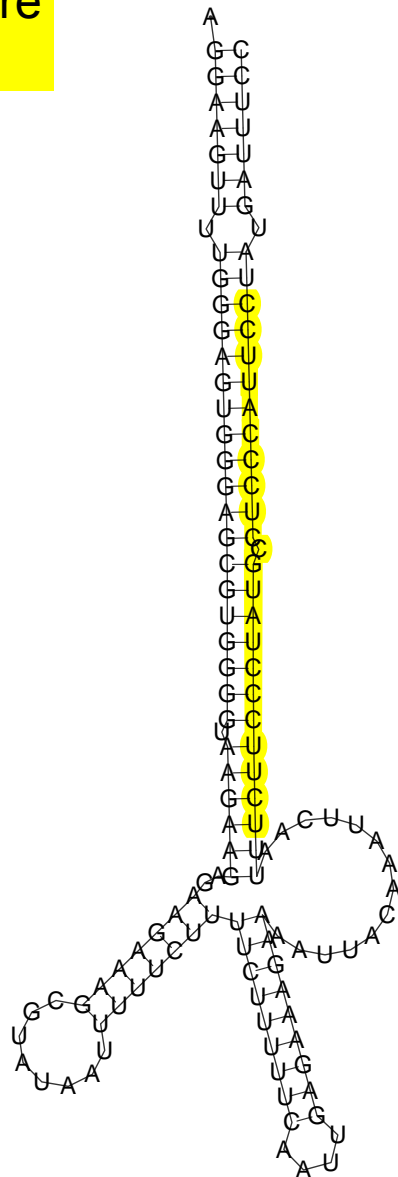



# Secondary structure for miR482a-5p

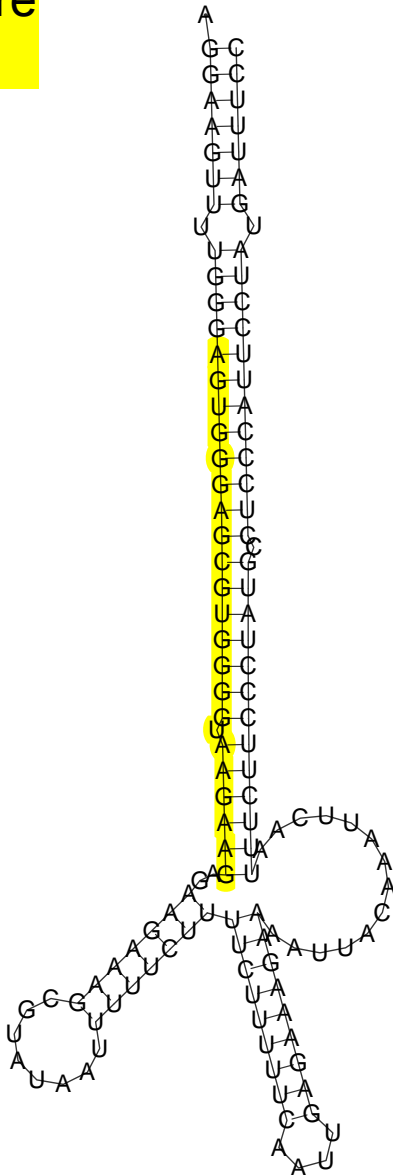



# Secondary structure for miR482c

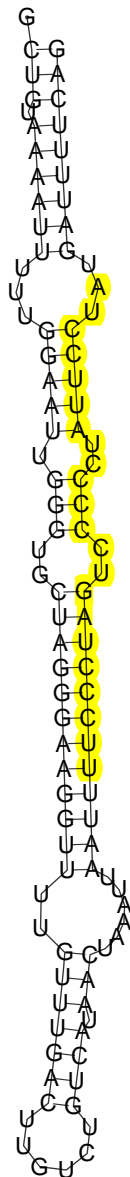





Secondary structure for miR482d-5p.2

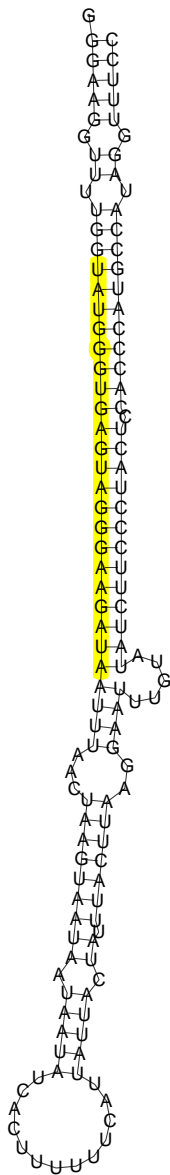

# Secondary structure for miR5054.1

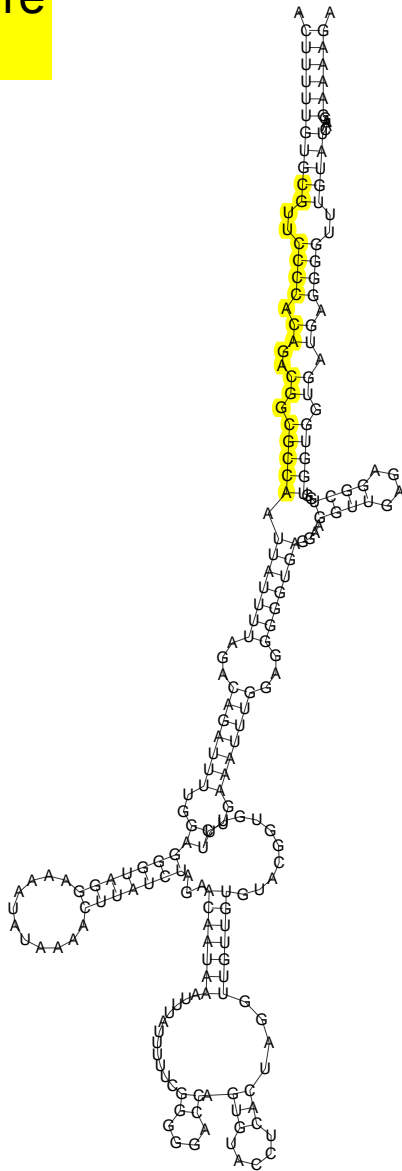

# Secondary structure for miR5054.2

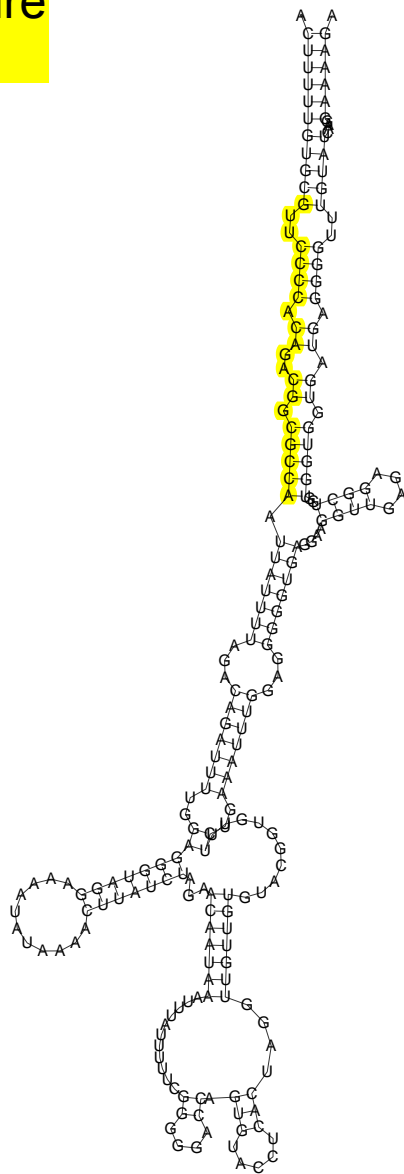







# Secondary structure for miR5225a

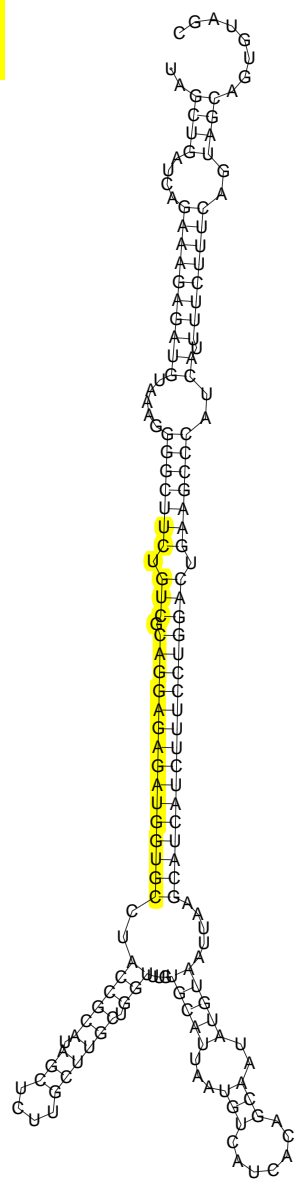

# Secondary structure for miR5291a

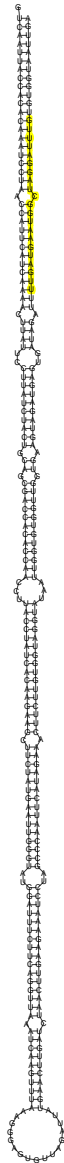







# Secondary structure for miR535.2

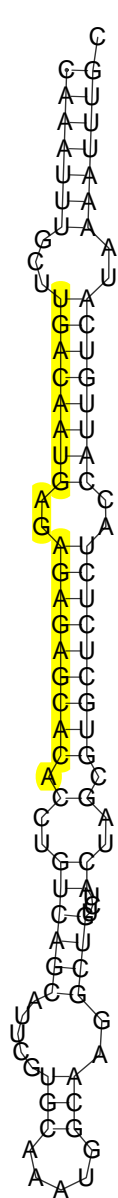



# Secondary structure for miR536-3p

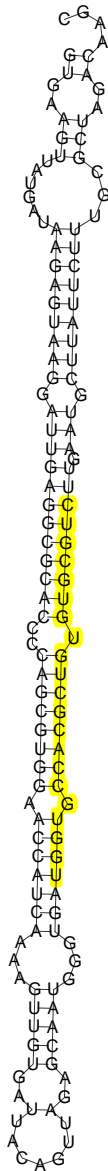

# Secondary structure for miR536-5p

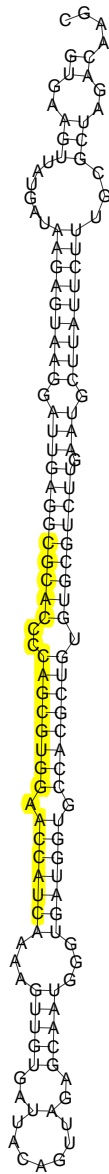















# Secondary structure for miR833.1

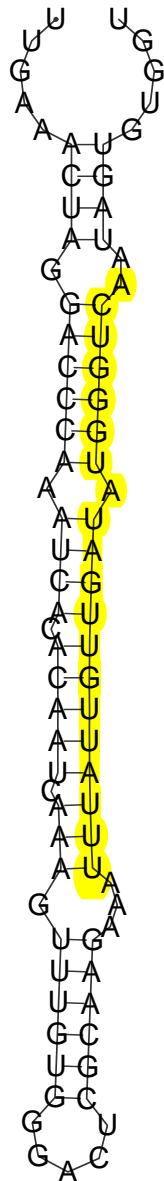





# Secondary structure for miRN01

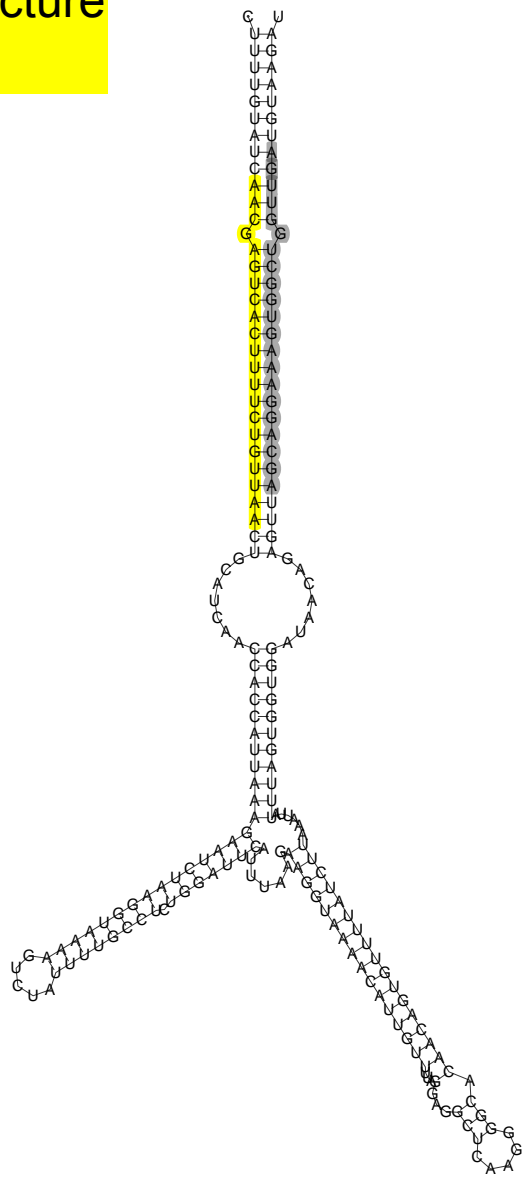







# Secondary structure for miRN05

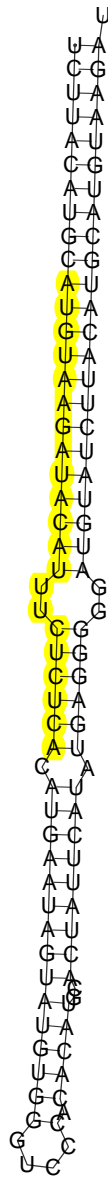







# Secondary structure for miRN08

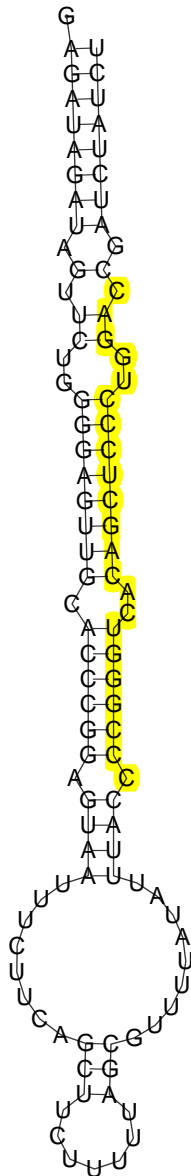







# Secondary structure for miRN12

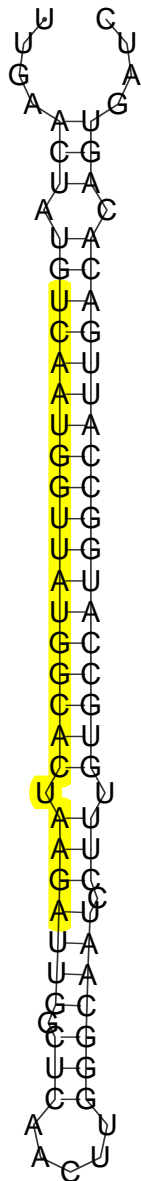













# Secondary structure for miRN18

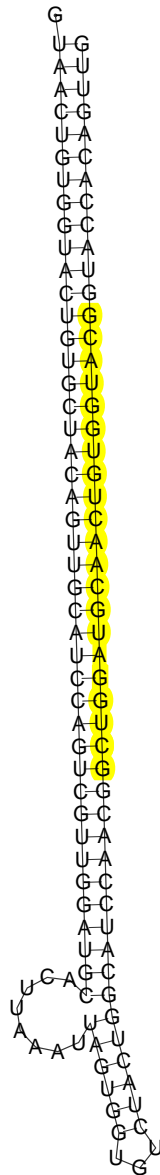

**Secondary structure  
for miRN19**

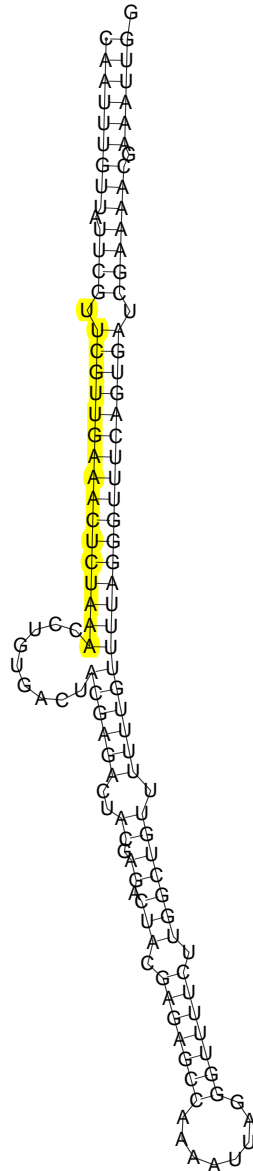

# Secondary structure for miRN20

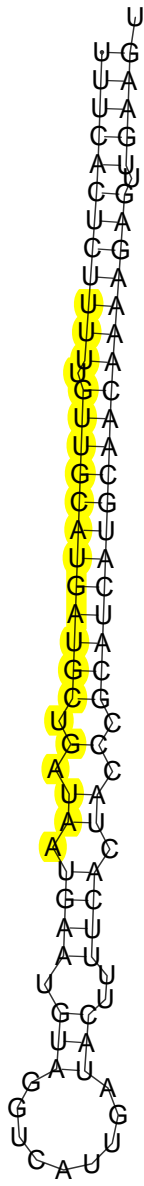













# Secondary structure for miRN26

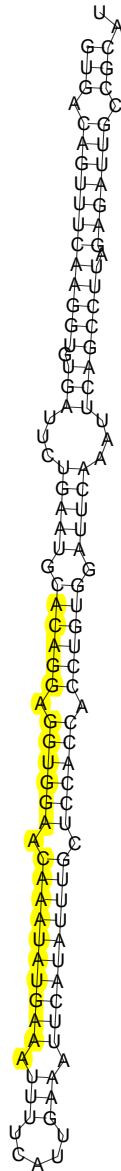

# Secondary structure I for miRN27

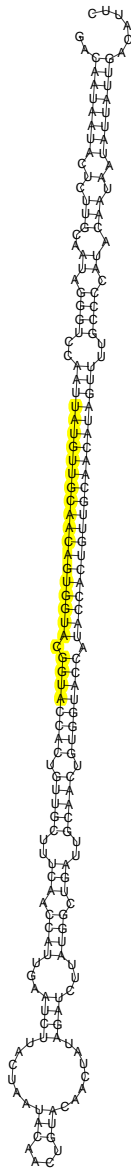



# Secondary structure for miRN28

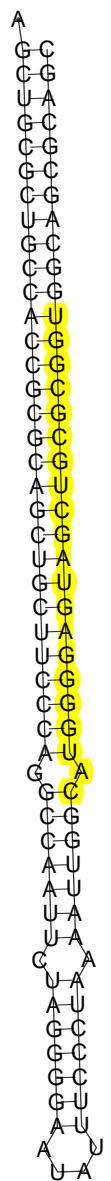





# Secondary structure for miRN30

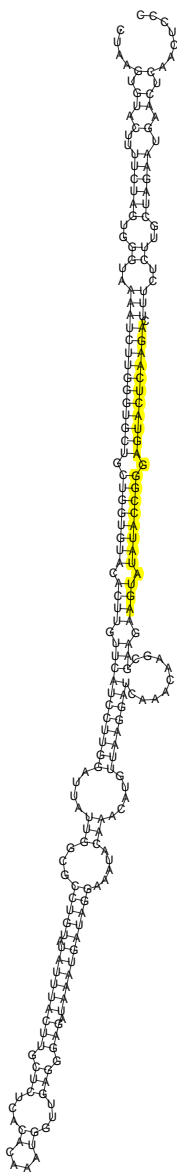

# Secondary structure for miRN31

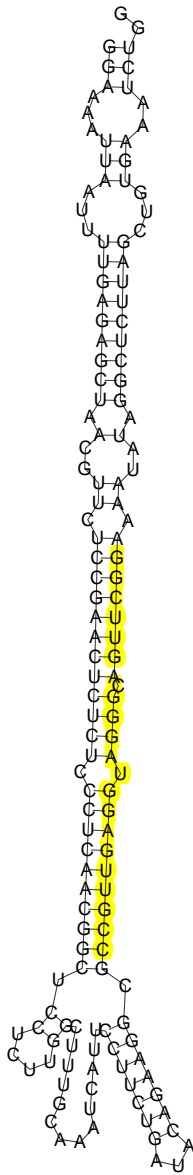

# Secondary structure for miRN32

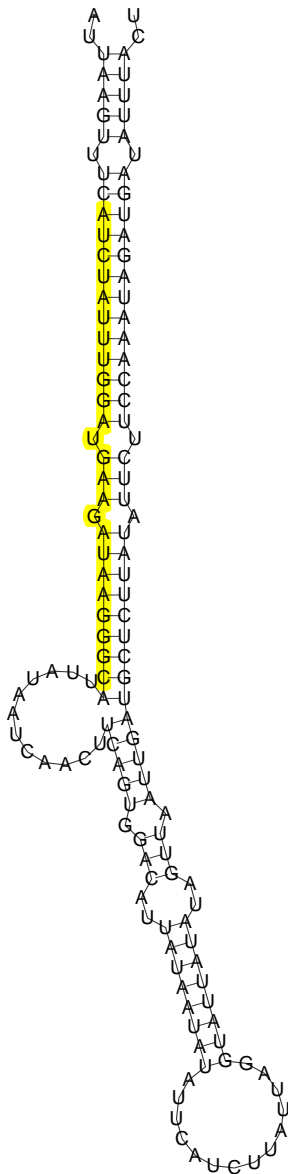

# Secondary structure for miRN33

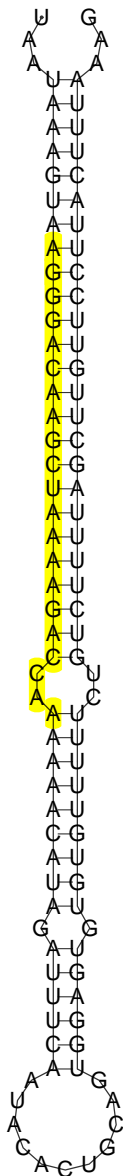









# Secondary structure for miRN37

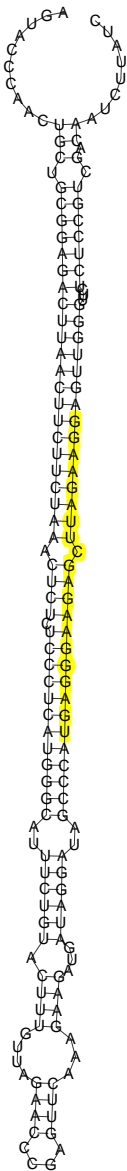

Supplement: 12864_2014_6413_MOESM1_ESM.pdf [file 12864_2014_6413_MOESM1_ESM.pdf]
