# Supplementary material for: Genome-wide comparison of microRNAs and their targeted transcripts among leaf, flower and fruit of sweet orange
Source: PubMed Central journal article supplement (PMC4158063; doi:10.1186/1471-2164-15-695), 2014-08-20

Additional file 5. T-plots of diverse targets of miRNAs in different tissues. Densities of the 5' positions of degradome tags matching each target gene are shown as T-plots. The miRNA-mediated degradome tag is highlighted in red. (a) miR168a targets AGO1 in all three tissues; additionally, miR168a targets CUC2 in leaf and a pantothenate kinase gene in fruit; (b) miR159 targets GAMYB in leaf and flower; but it targets DRT100 in fruit; (c) miRN10 targets different transcripts in flower and fruit.

# (a)miR168a

Conserved target: AGO 1

Tissue-specific target

Target=*Cs5g16710*,gene=*AGO1*

Target=*Orange1.It00591*,gene=*CUC2*

In leaf

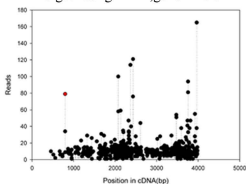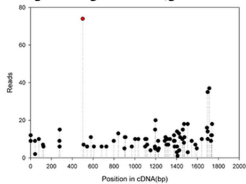

5' AUUCCCGAGCUACACCAAGCAACCCC 3' *Cs5g16710.1*  
3' -AAGGGCUGGACUGGGUUCGCU---- 5' *Csi-miR168a*

5' AUACCCGAGCUCCACCAAGCGGACAU 3' *Orange1.It00591.1*  
3' -AAGGGCUGGACUGGGUUCGCU---- 5' *Csi-miR168a*

Target=*Cs5g16710*,gene=*AGO1*

In flower

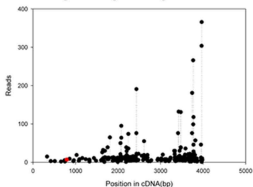

Not detected

5' AUUCCCGAGCUACACCAAGCAACCCC 3' *Cs5g16710.1*  
3' -AAGGGCUGGACUGGGUUCGCU---- 5' *Csi-miR168a*

Target=*Cs5g16710*,gene=*AGO1*

Target=*Cs5g05510*,gene=*Pantothenate kinase*

In fruit

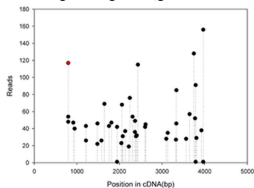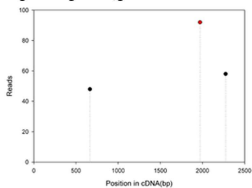

5' AUUCCCGAGCUACACCAAGCAACCCC 3' *Cs5g16710.1*  
3' -AAGGGCUGGACUGGGUUCGCU---- 5' *Csi-miR168a*

5' AUUCCUCCUCCUGGACUAAAGGAUUA 3' *Cs5g05510.1*  
3' -AAGGGCUGGACUGGGUUCGCU---- 5' *Csi-miR168a*

## (b)miR159

Target=*Cs3g06390*,gene=*GAMYB*

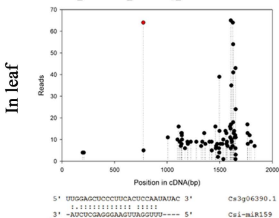

Target=*Cs3g06390*,gene=*GAMYB*

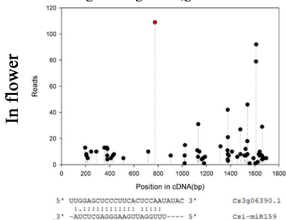

Target=*Cs8g05120*,gene=*DRT100*

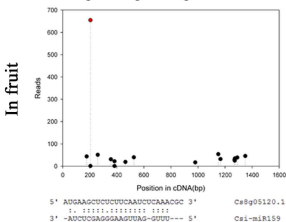

Supplement: 12864_2014_6413_MOESM5_ESM.pdf [file 12864_2014_6413_MOESM5_ESM.pdf]
