# Supplementary material for: Genome-wide comparison of microRNAs and their targeted transcripts among leaf, flower and fruit of sweet orange
Source: PubMed Central journal article supplement (PMC4158063; doi:10.1186/1471-2164-15-695), 2014-08-20

**Additional file 11: Confirmation of the expression levels of 80 selected miRNAs in different tissues by qRT-PCR. A total of 65 known miRNAs and 15 novel miRNAs were selected according to their differential expression in leaf (L), flower (F) and fruit (Fr), which was derived from high-throughput sequencing. The expression levels of these miRNAs were confirmed using stem-loop qRT-PCR. U4 was used as a loading control gene in qRT-PCR. The data are represented as the mean plus SD of n = 3 biological replicates.**

### Csi-miR1092.2

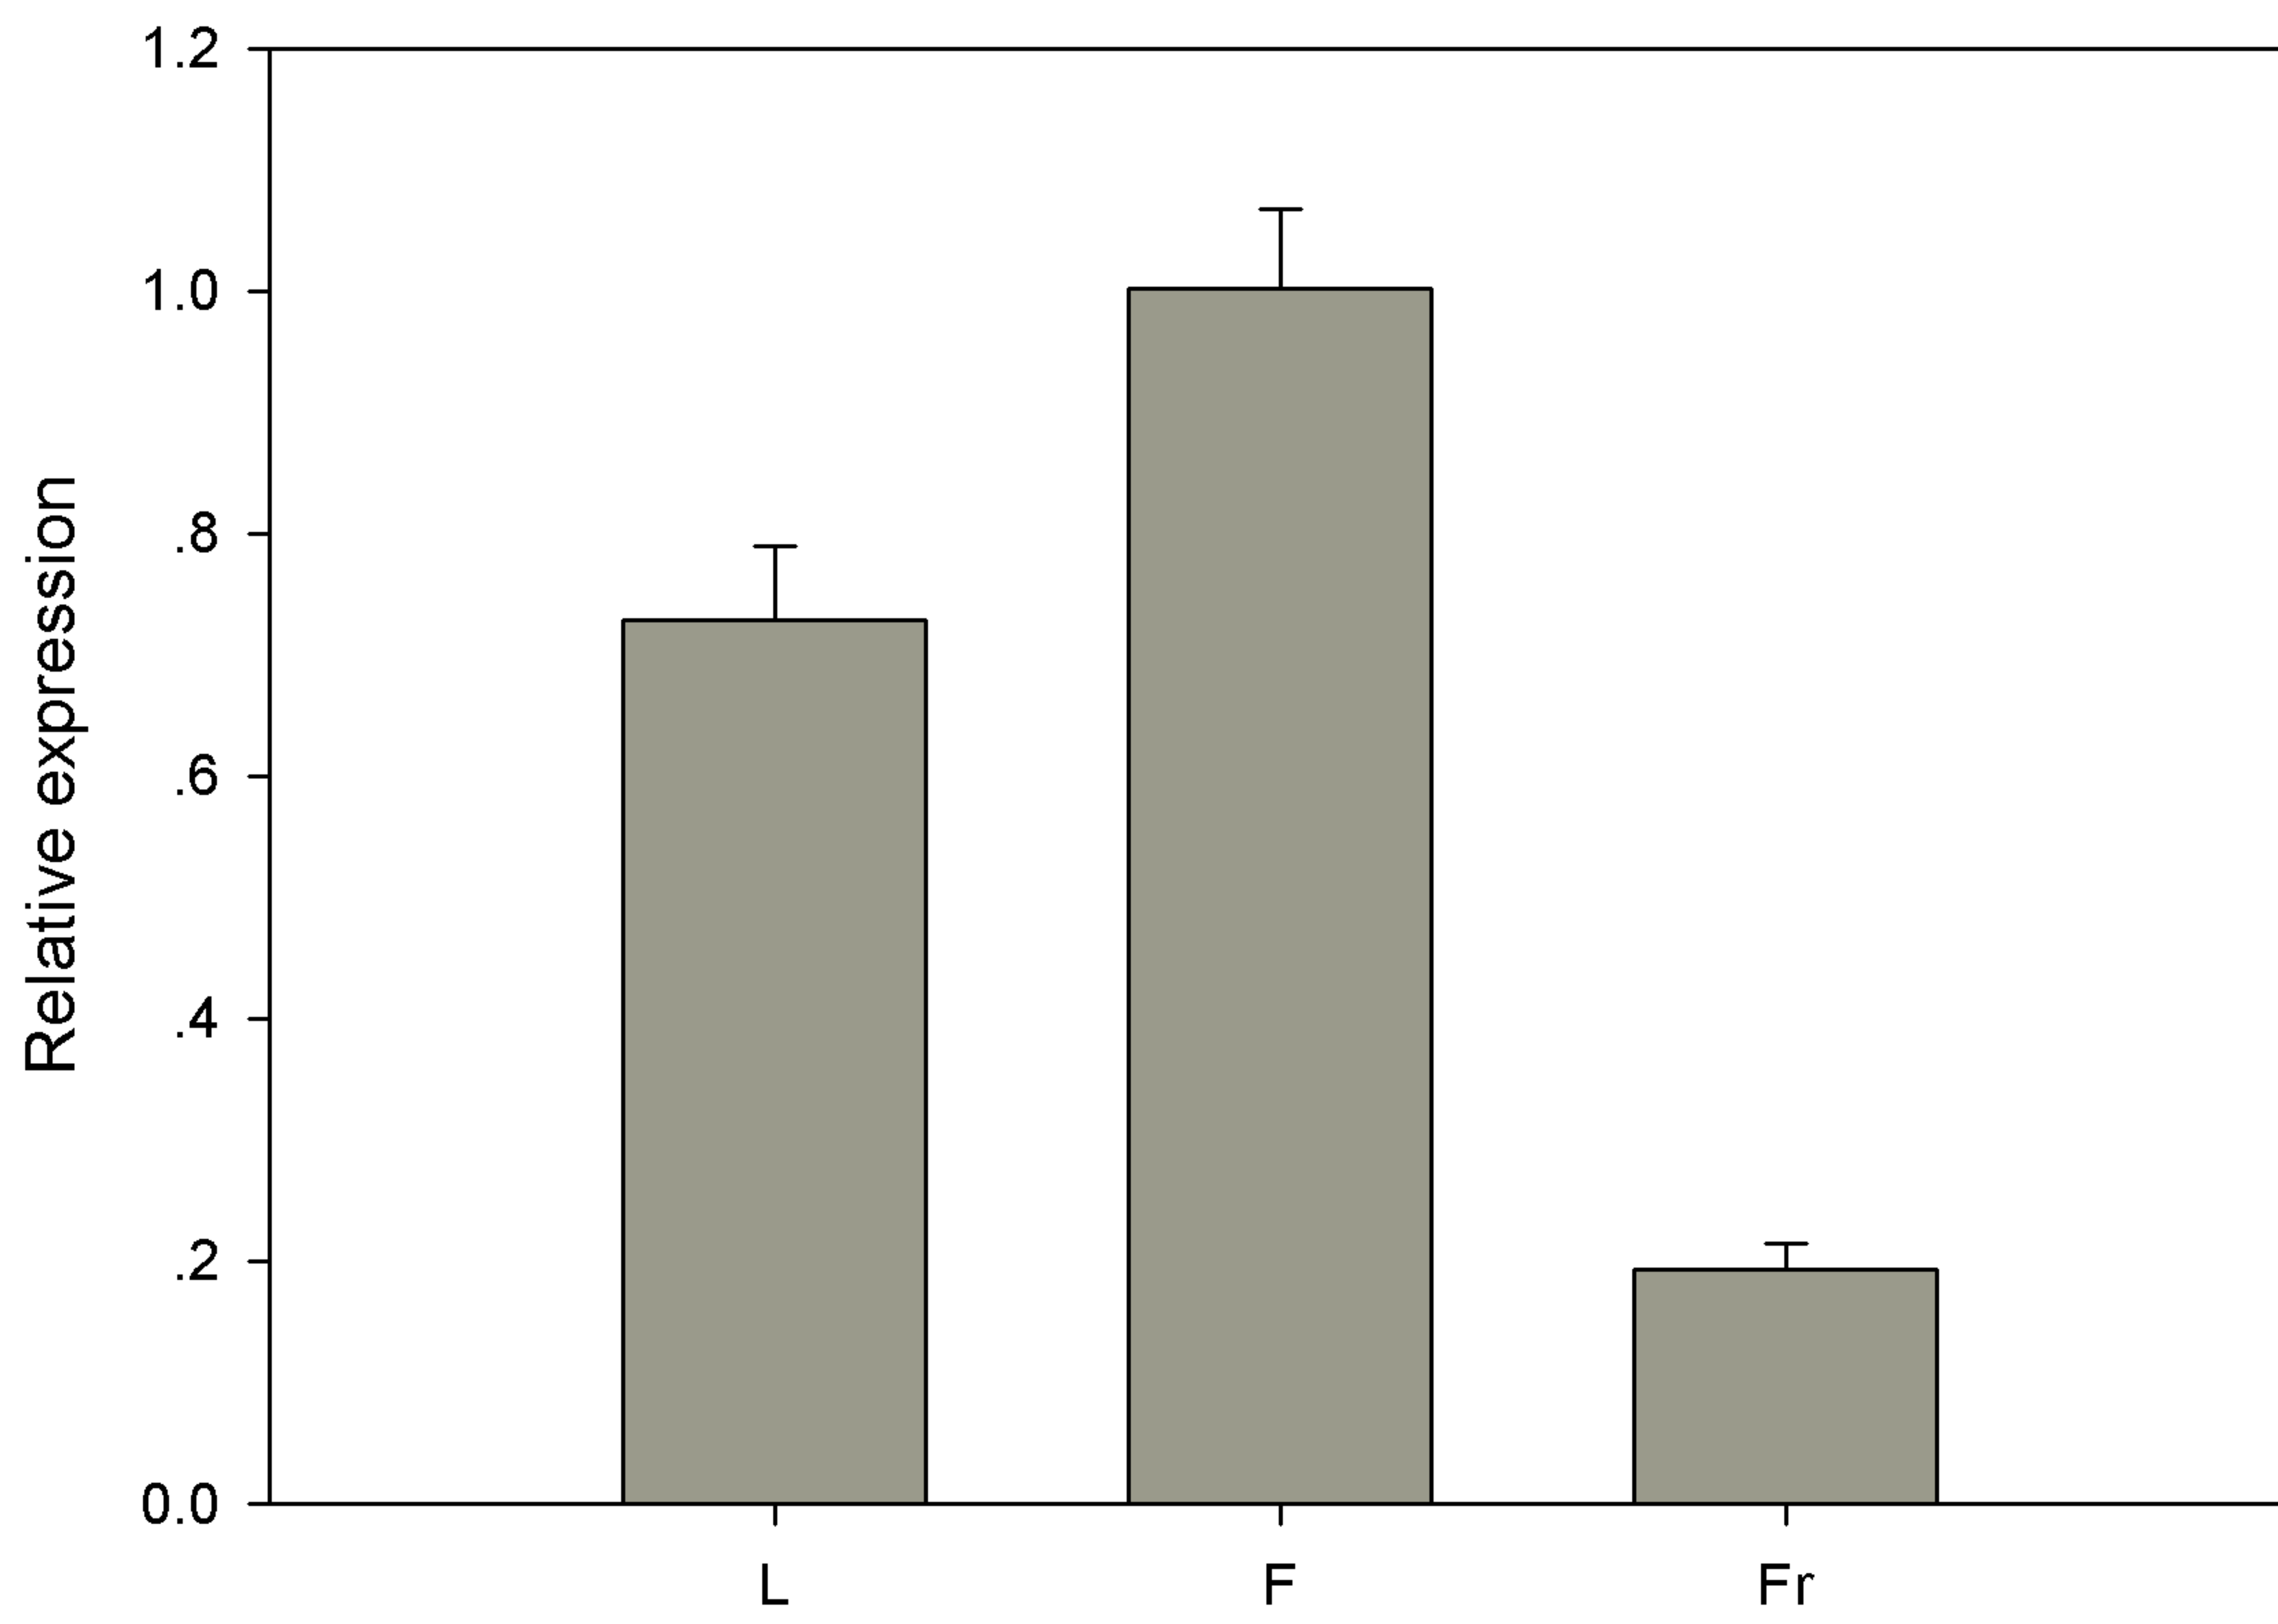

### Csi-miR1432a

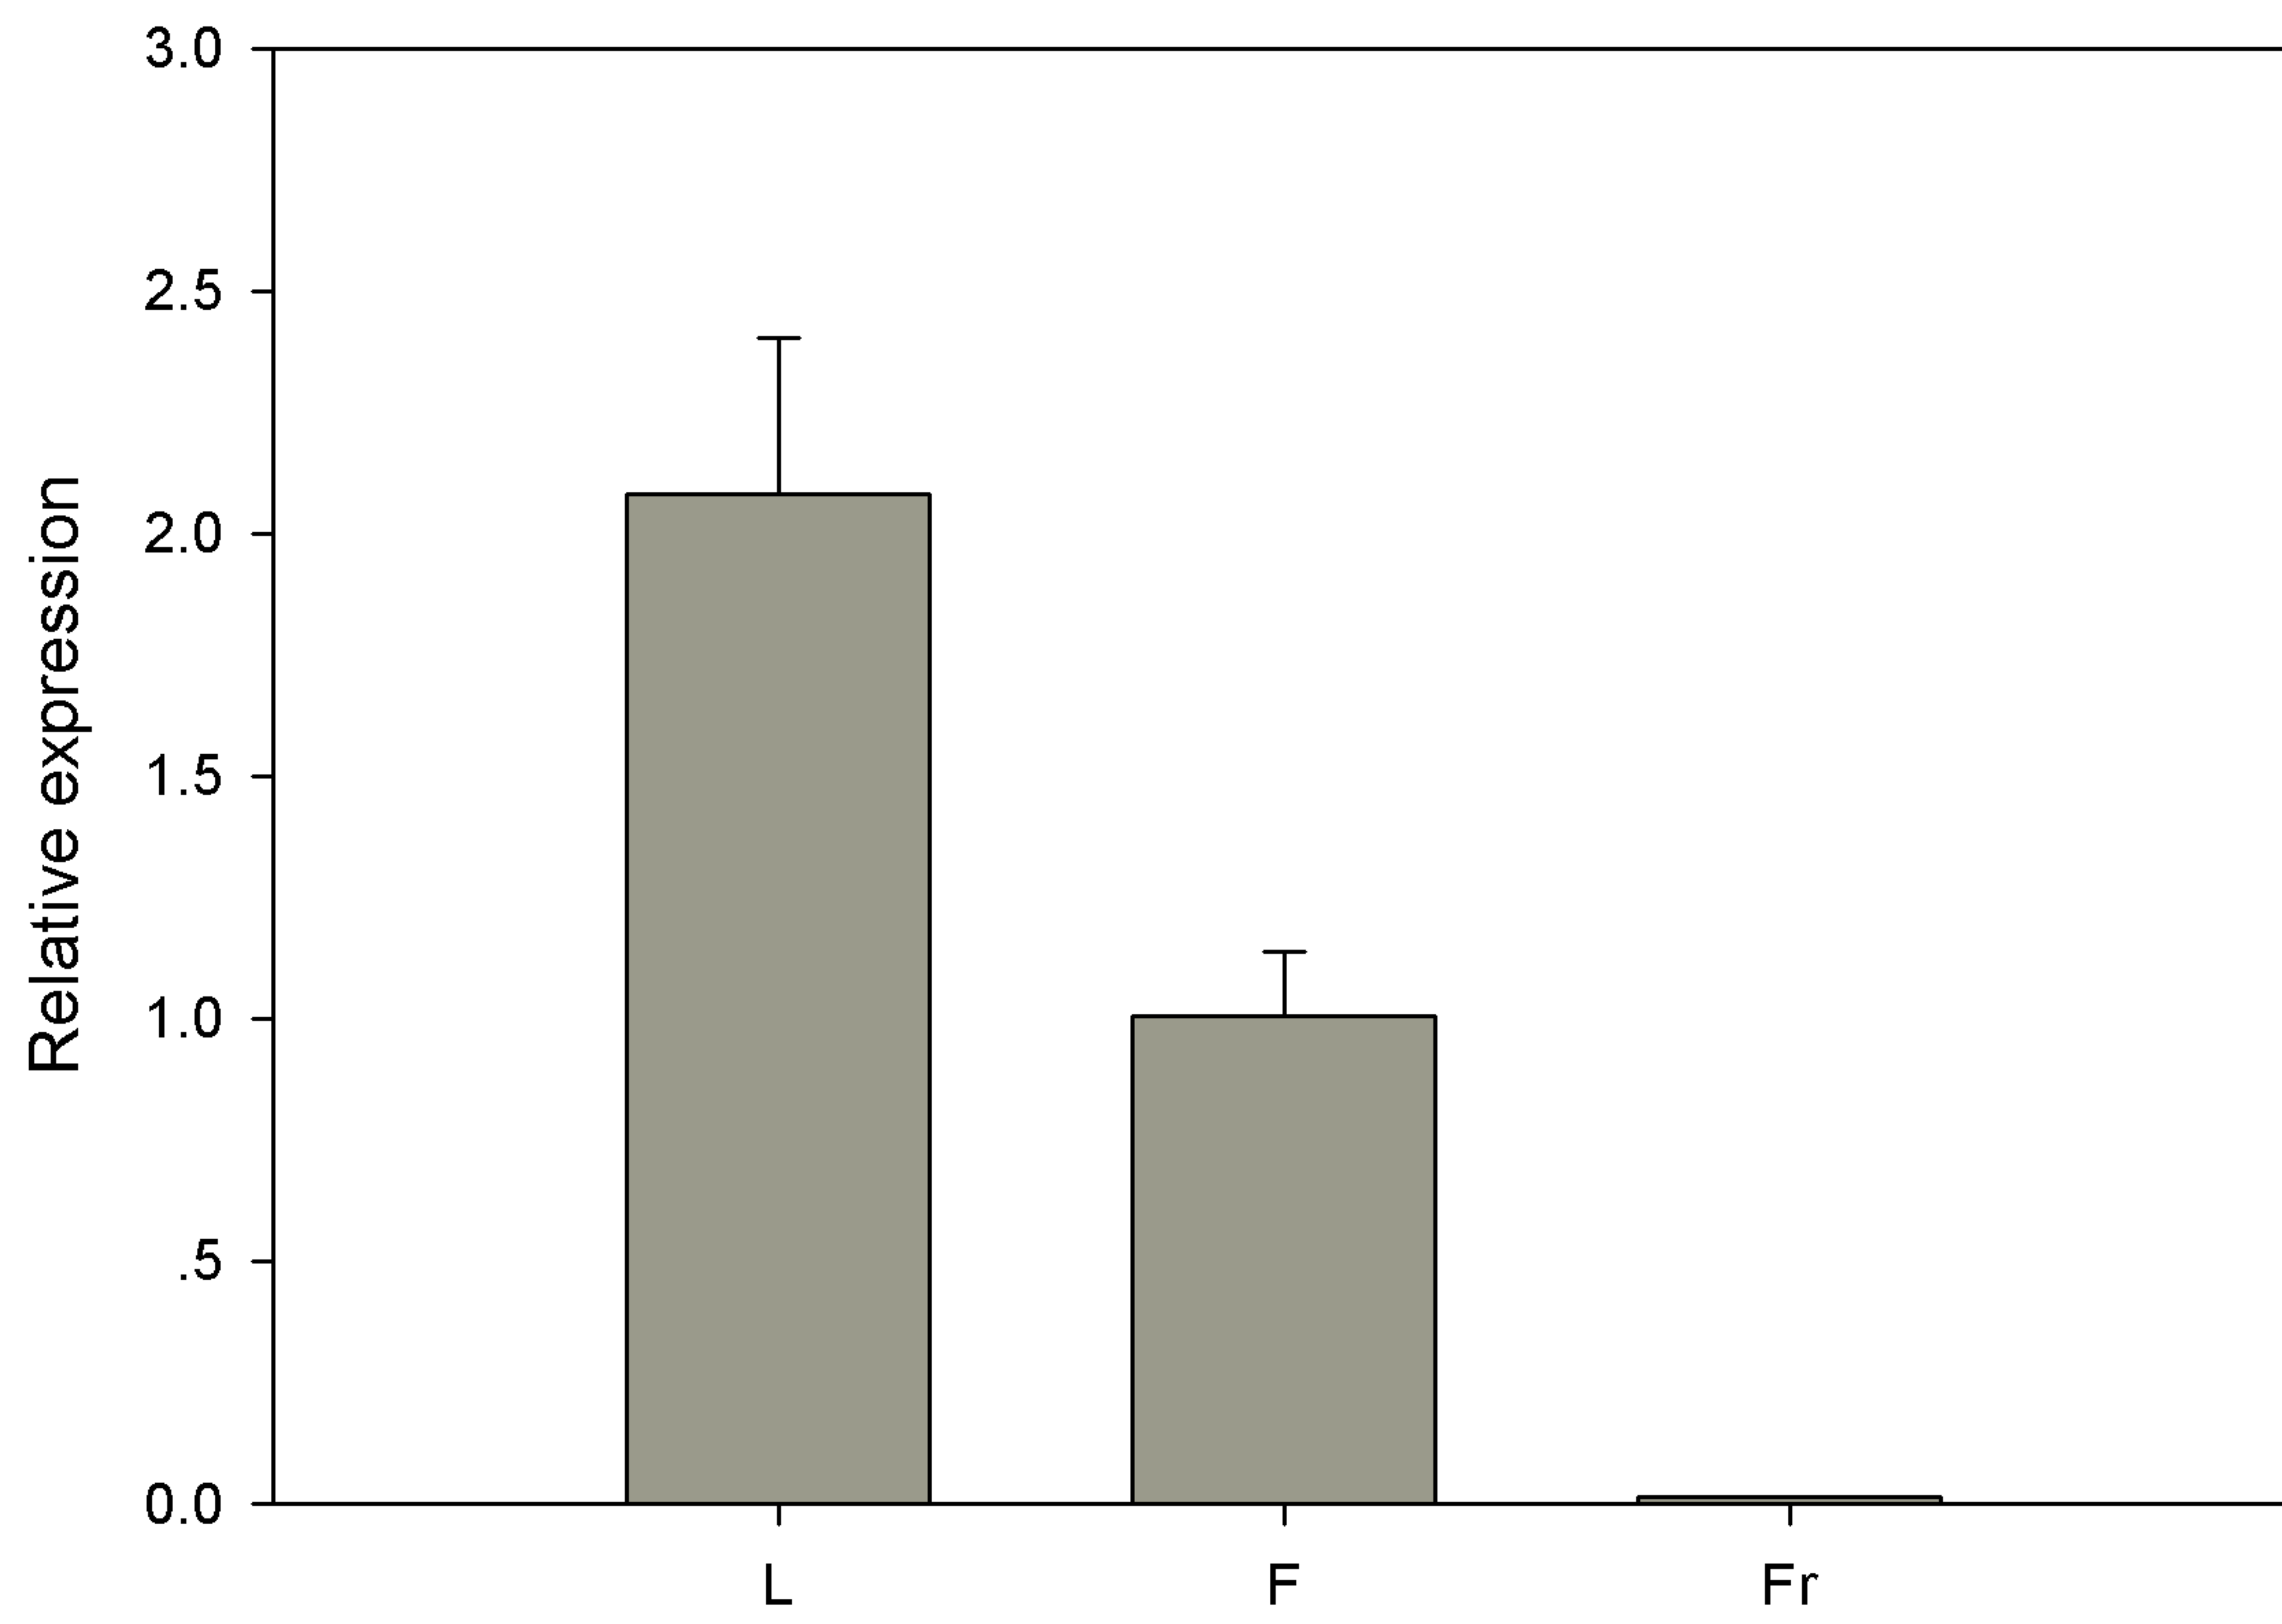

### Csi-miR1446

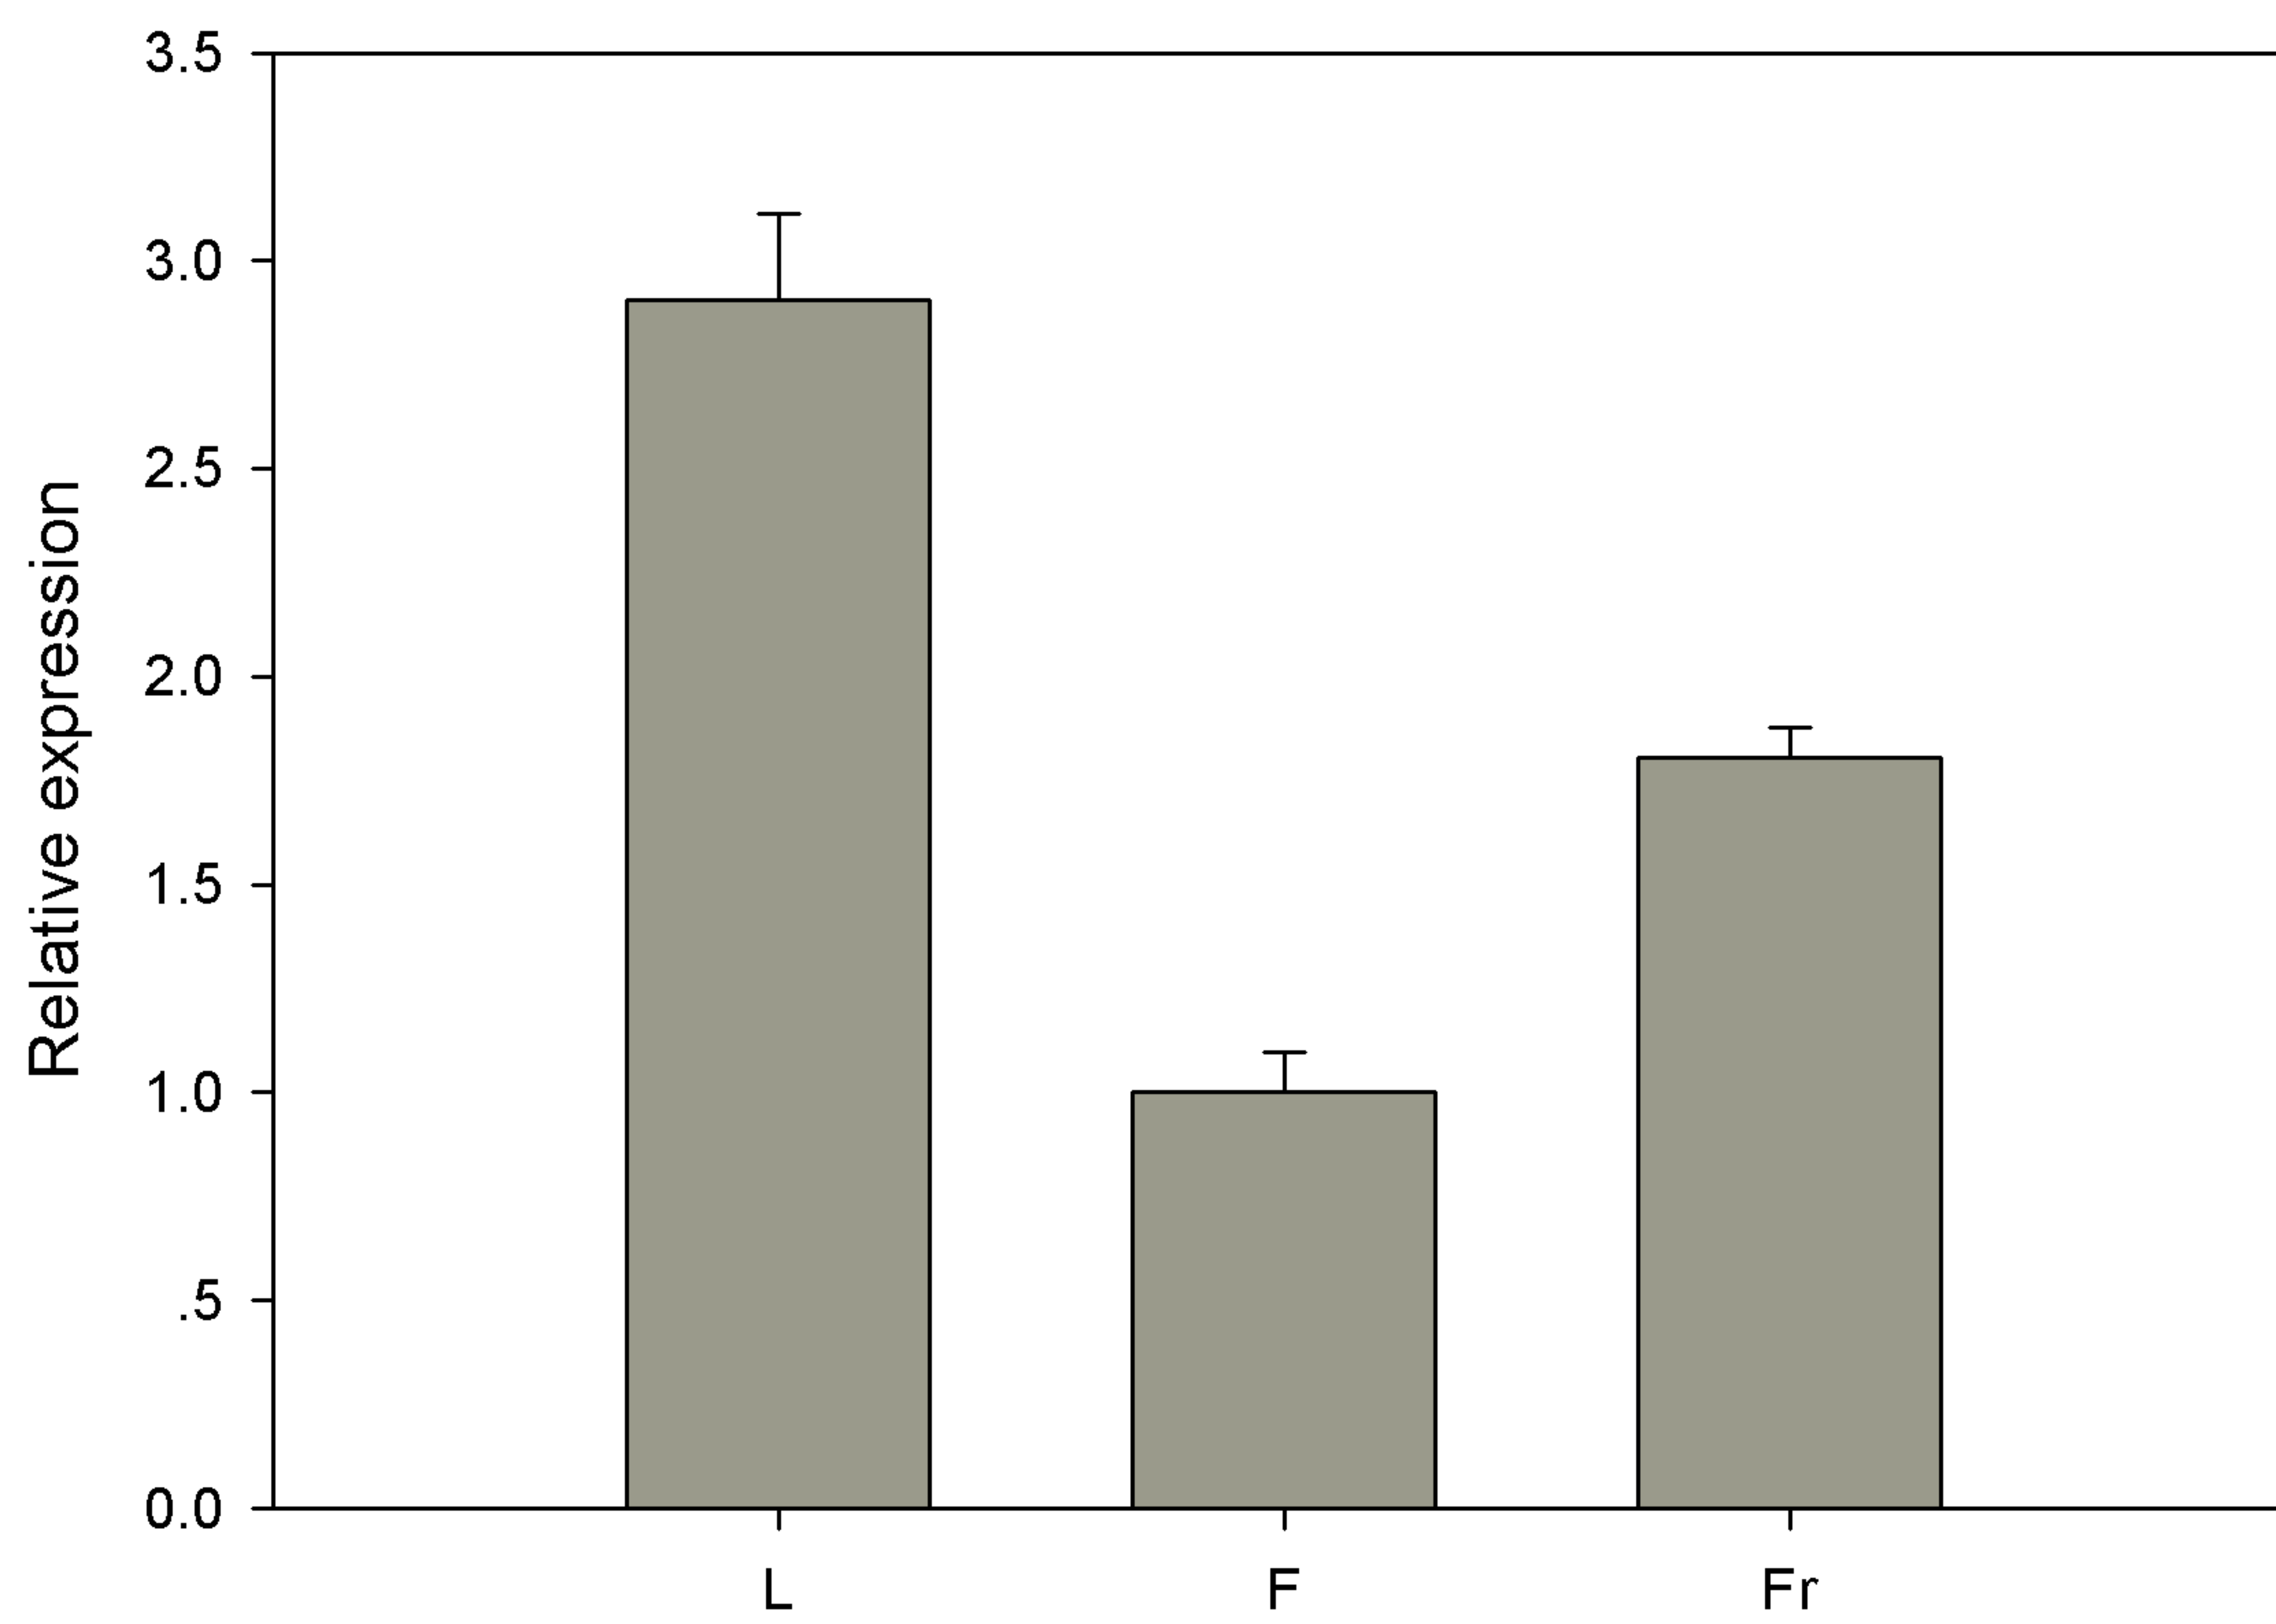

### Csi-miR156c.1

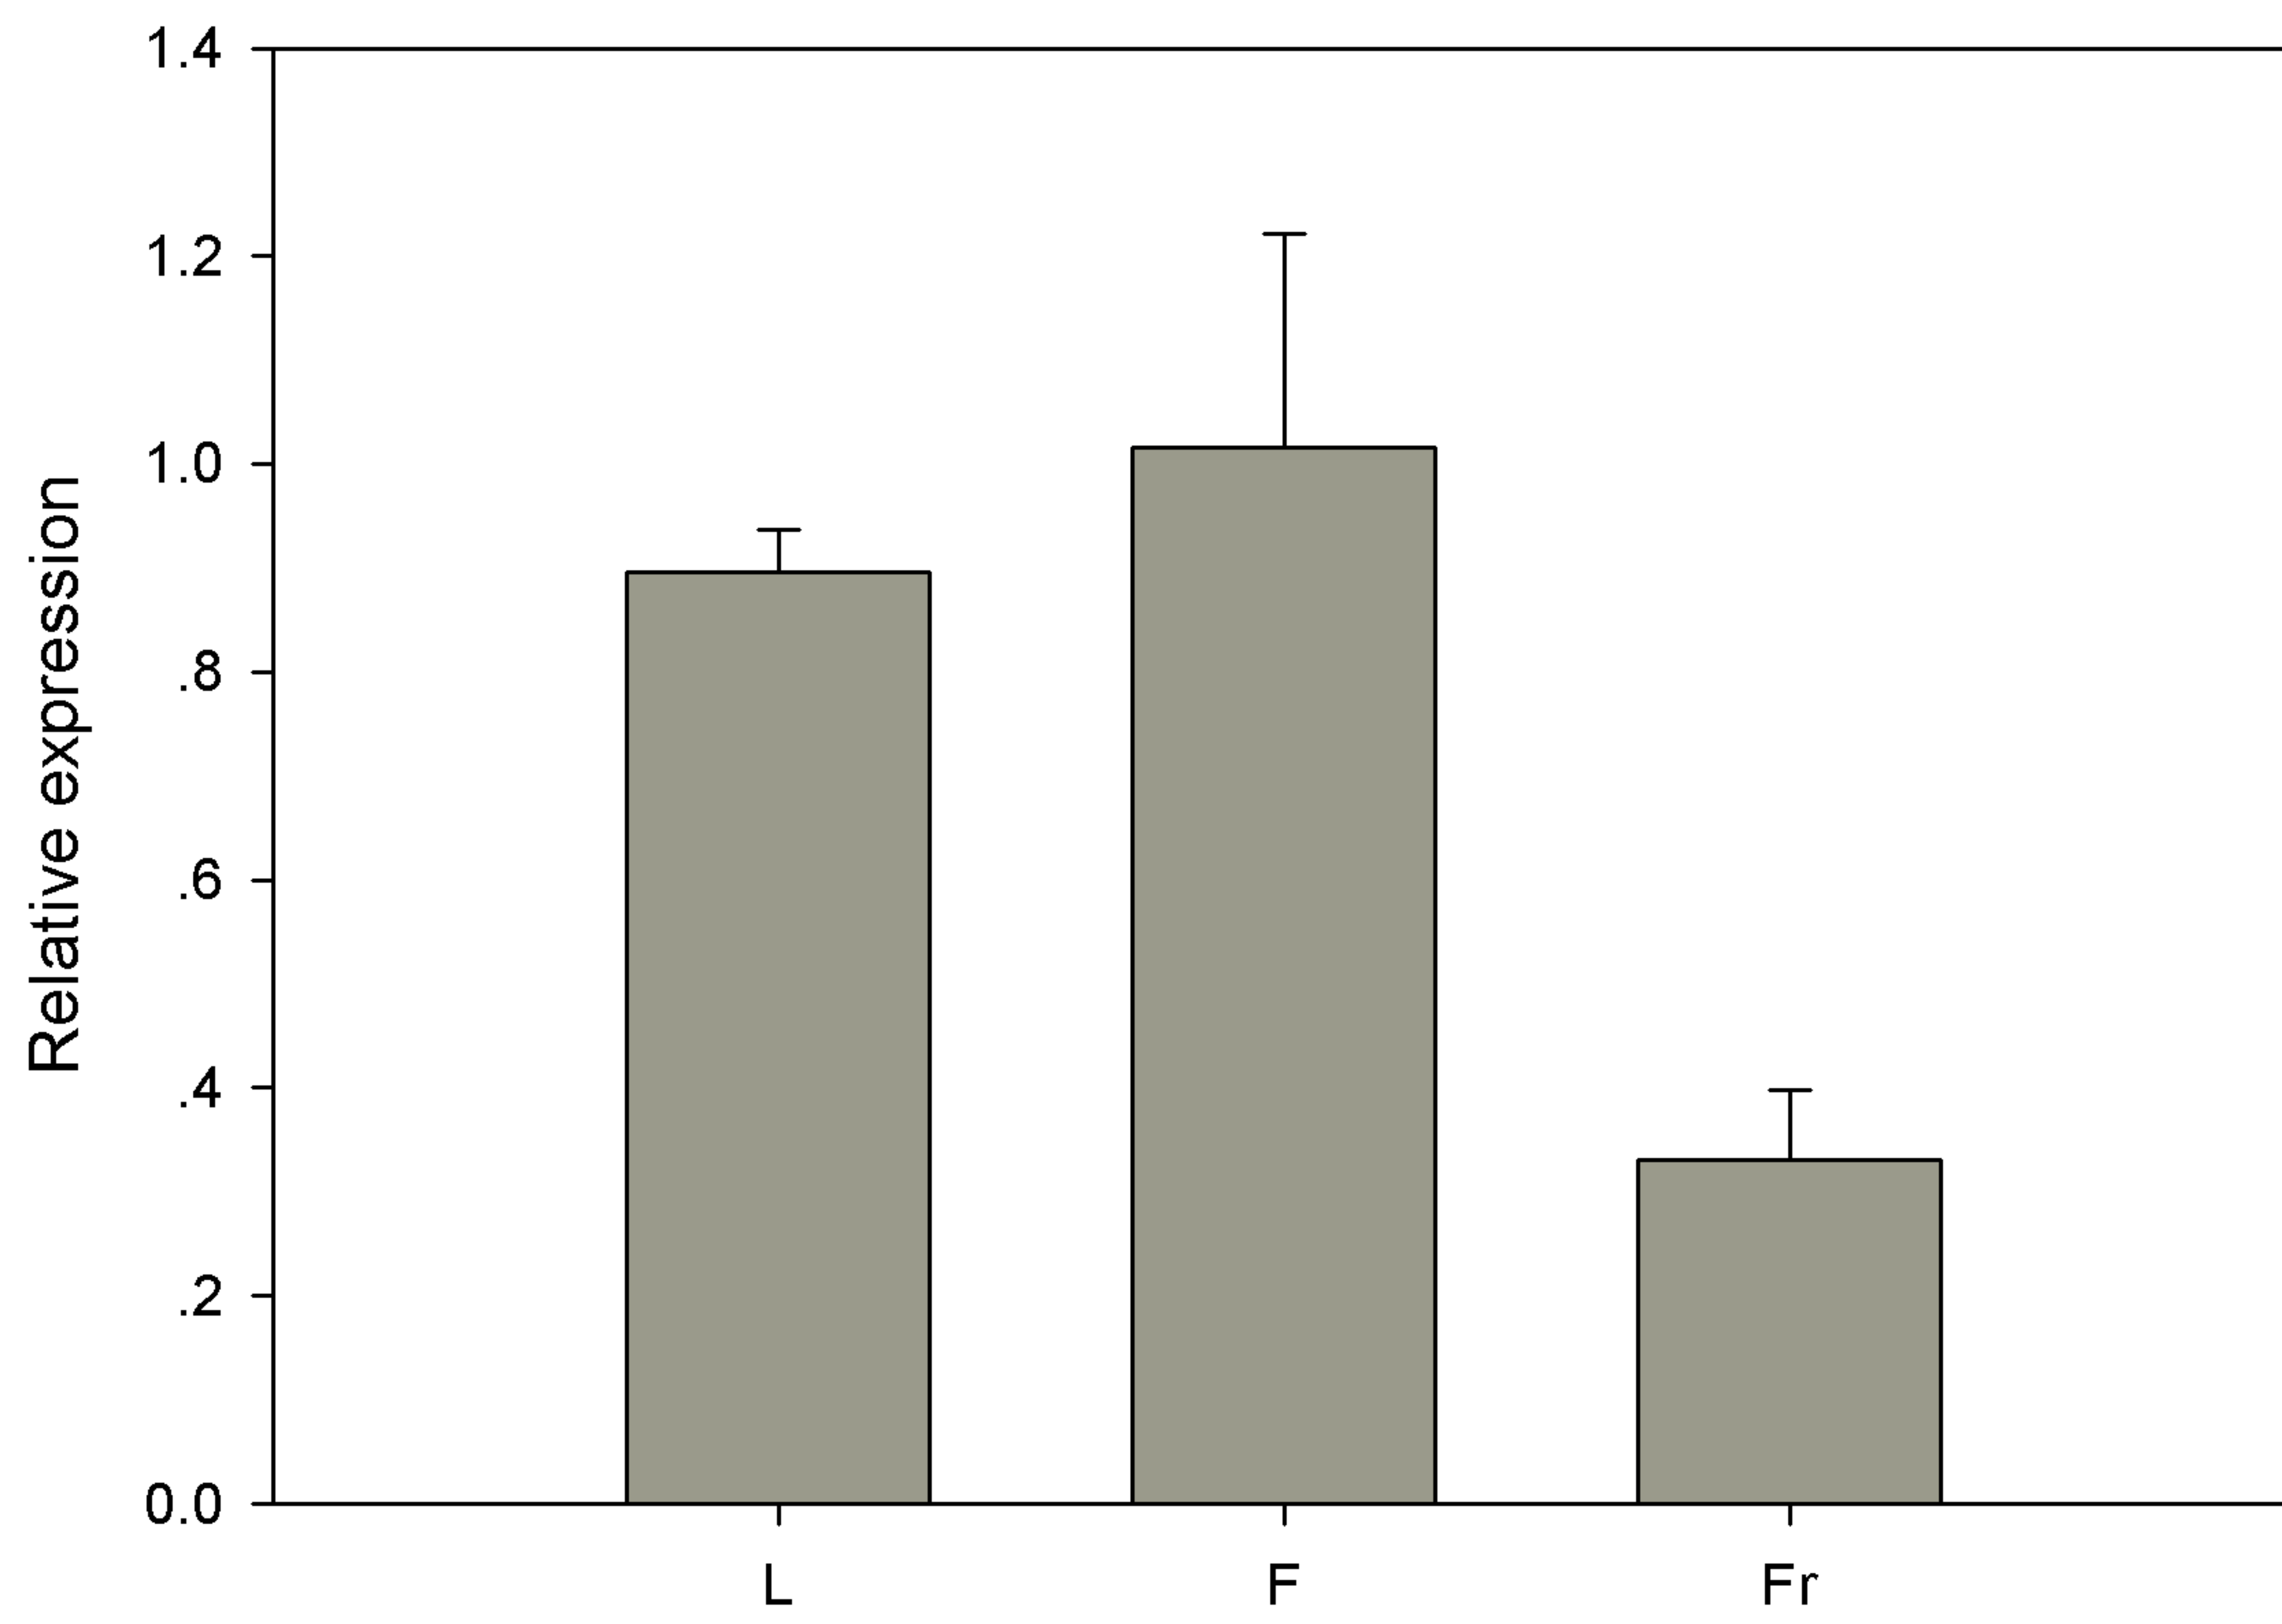

### Csi-miR156e

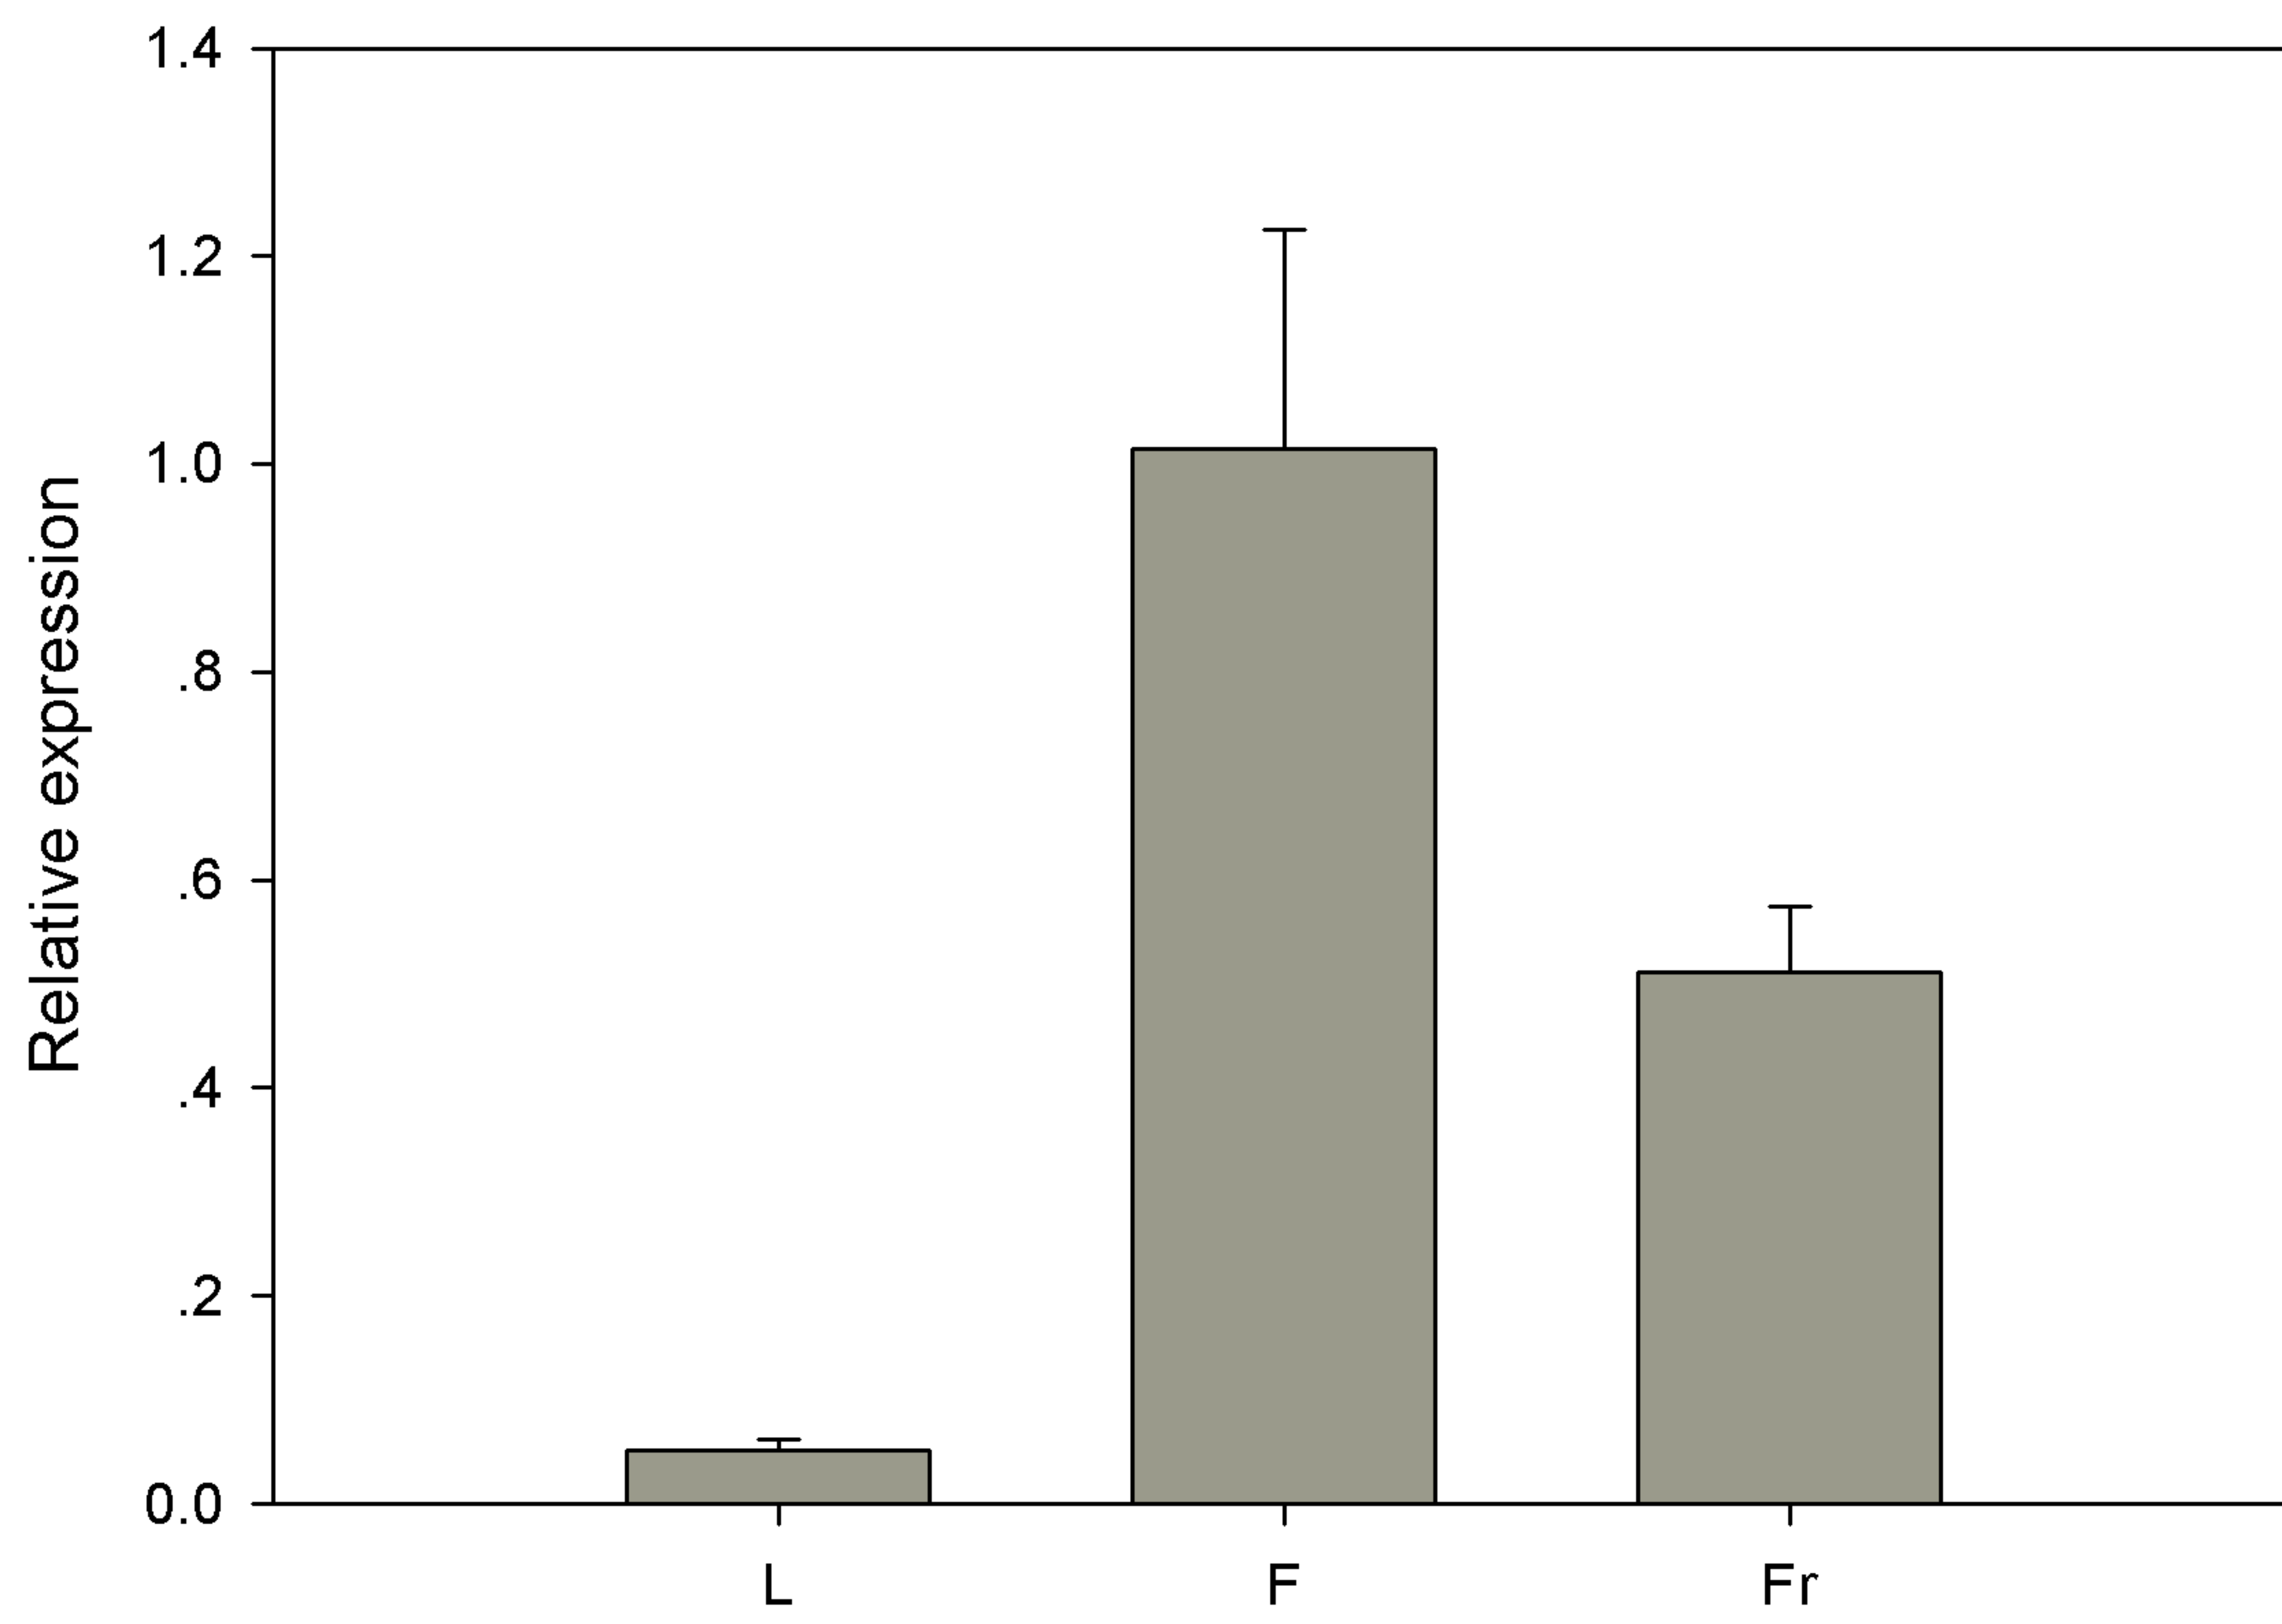

### Csi-miR156g.1

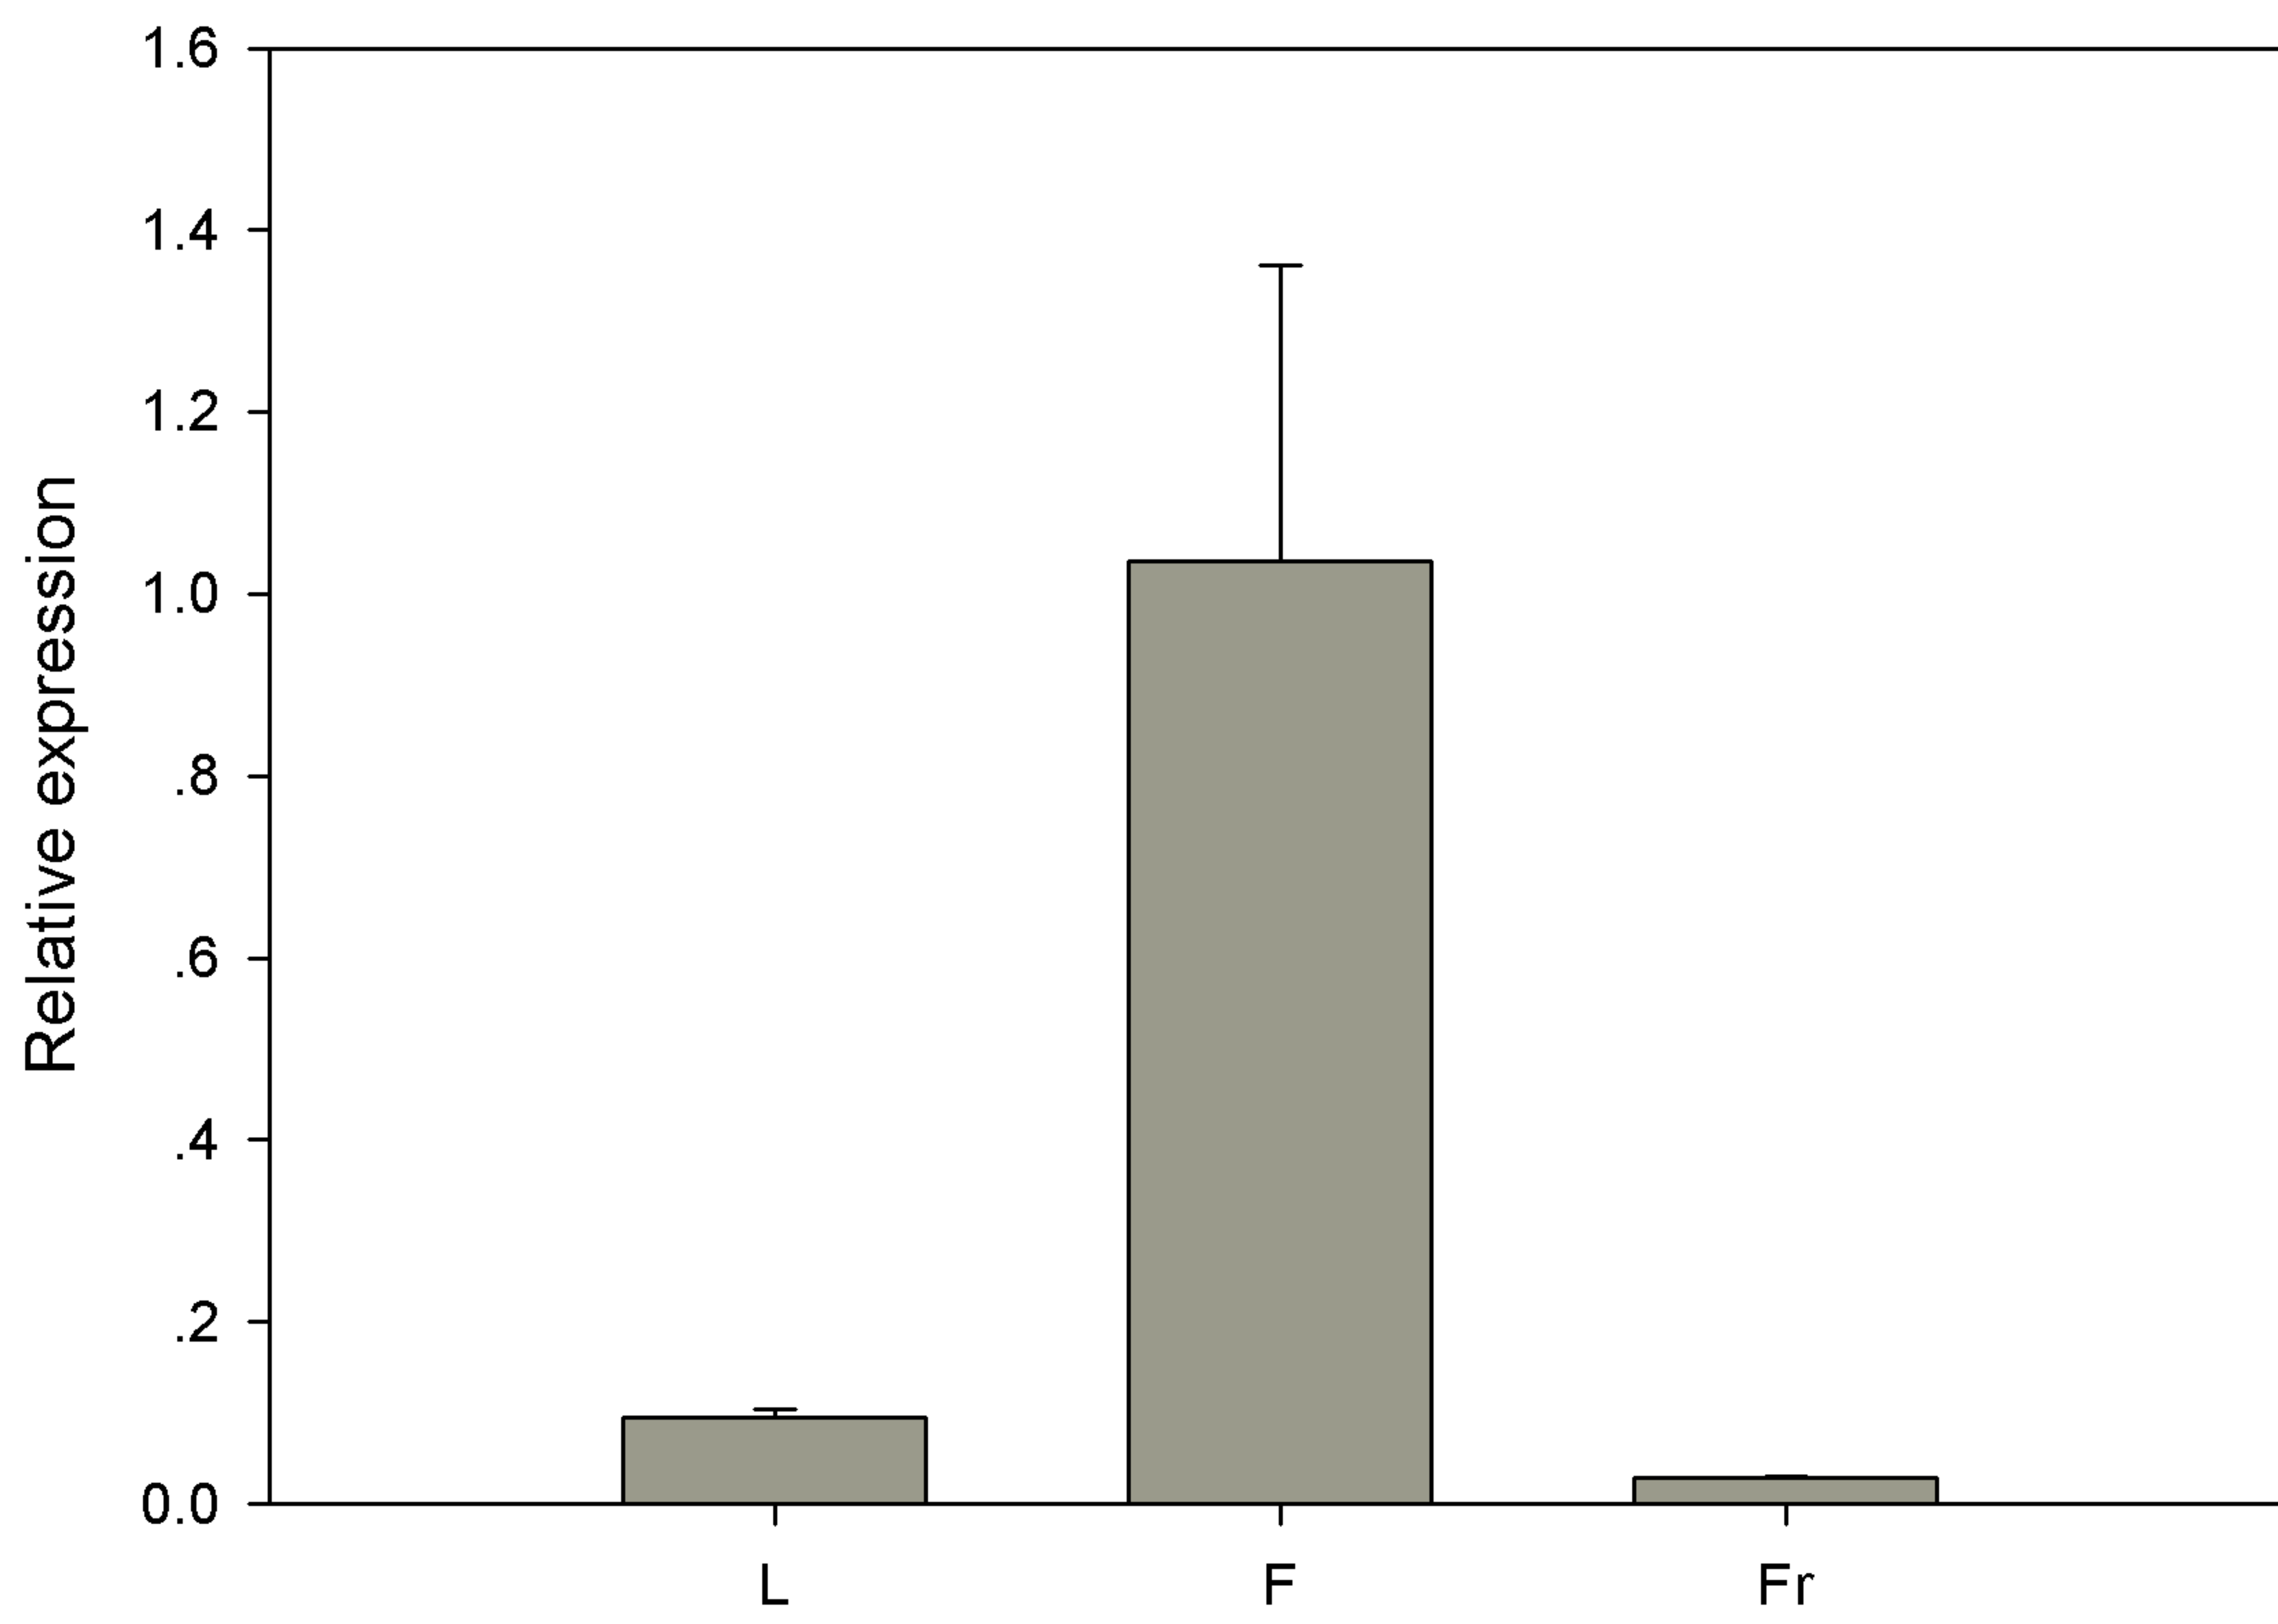

### Csi-miR159

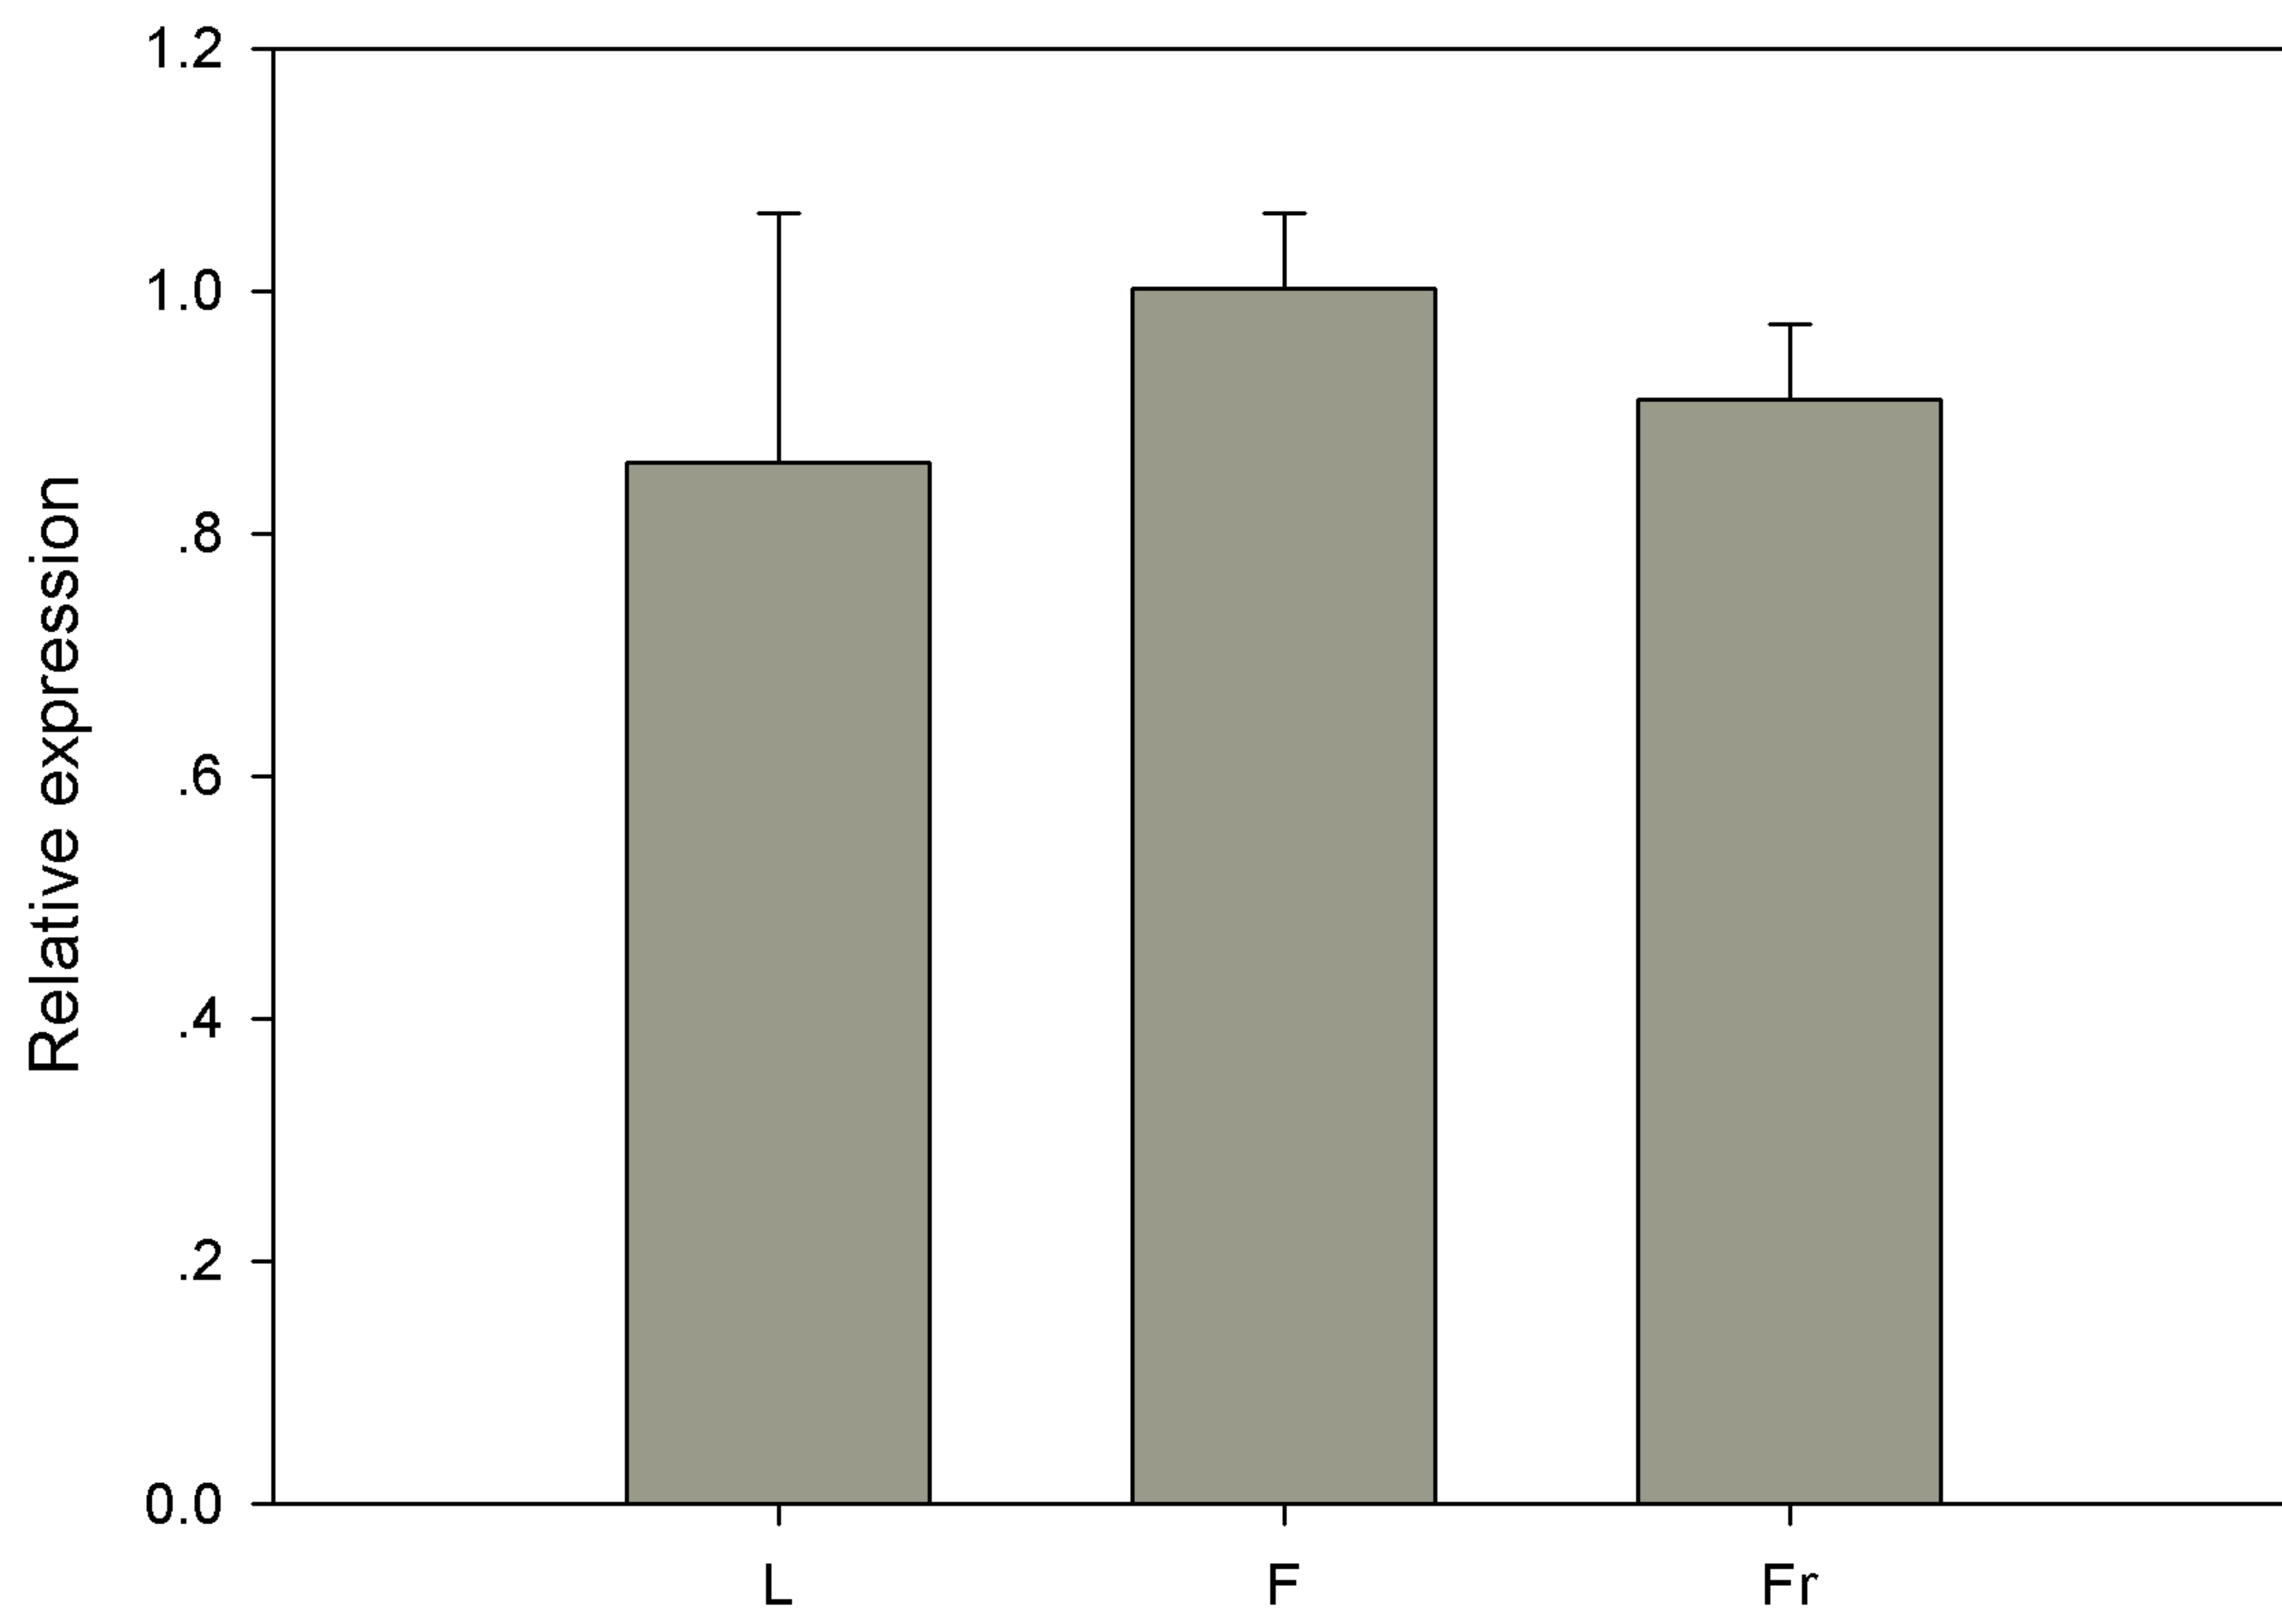



### Csi-miR160b-3p

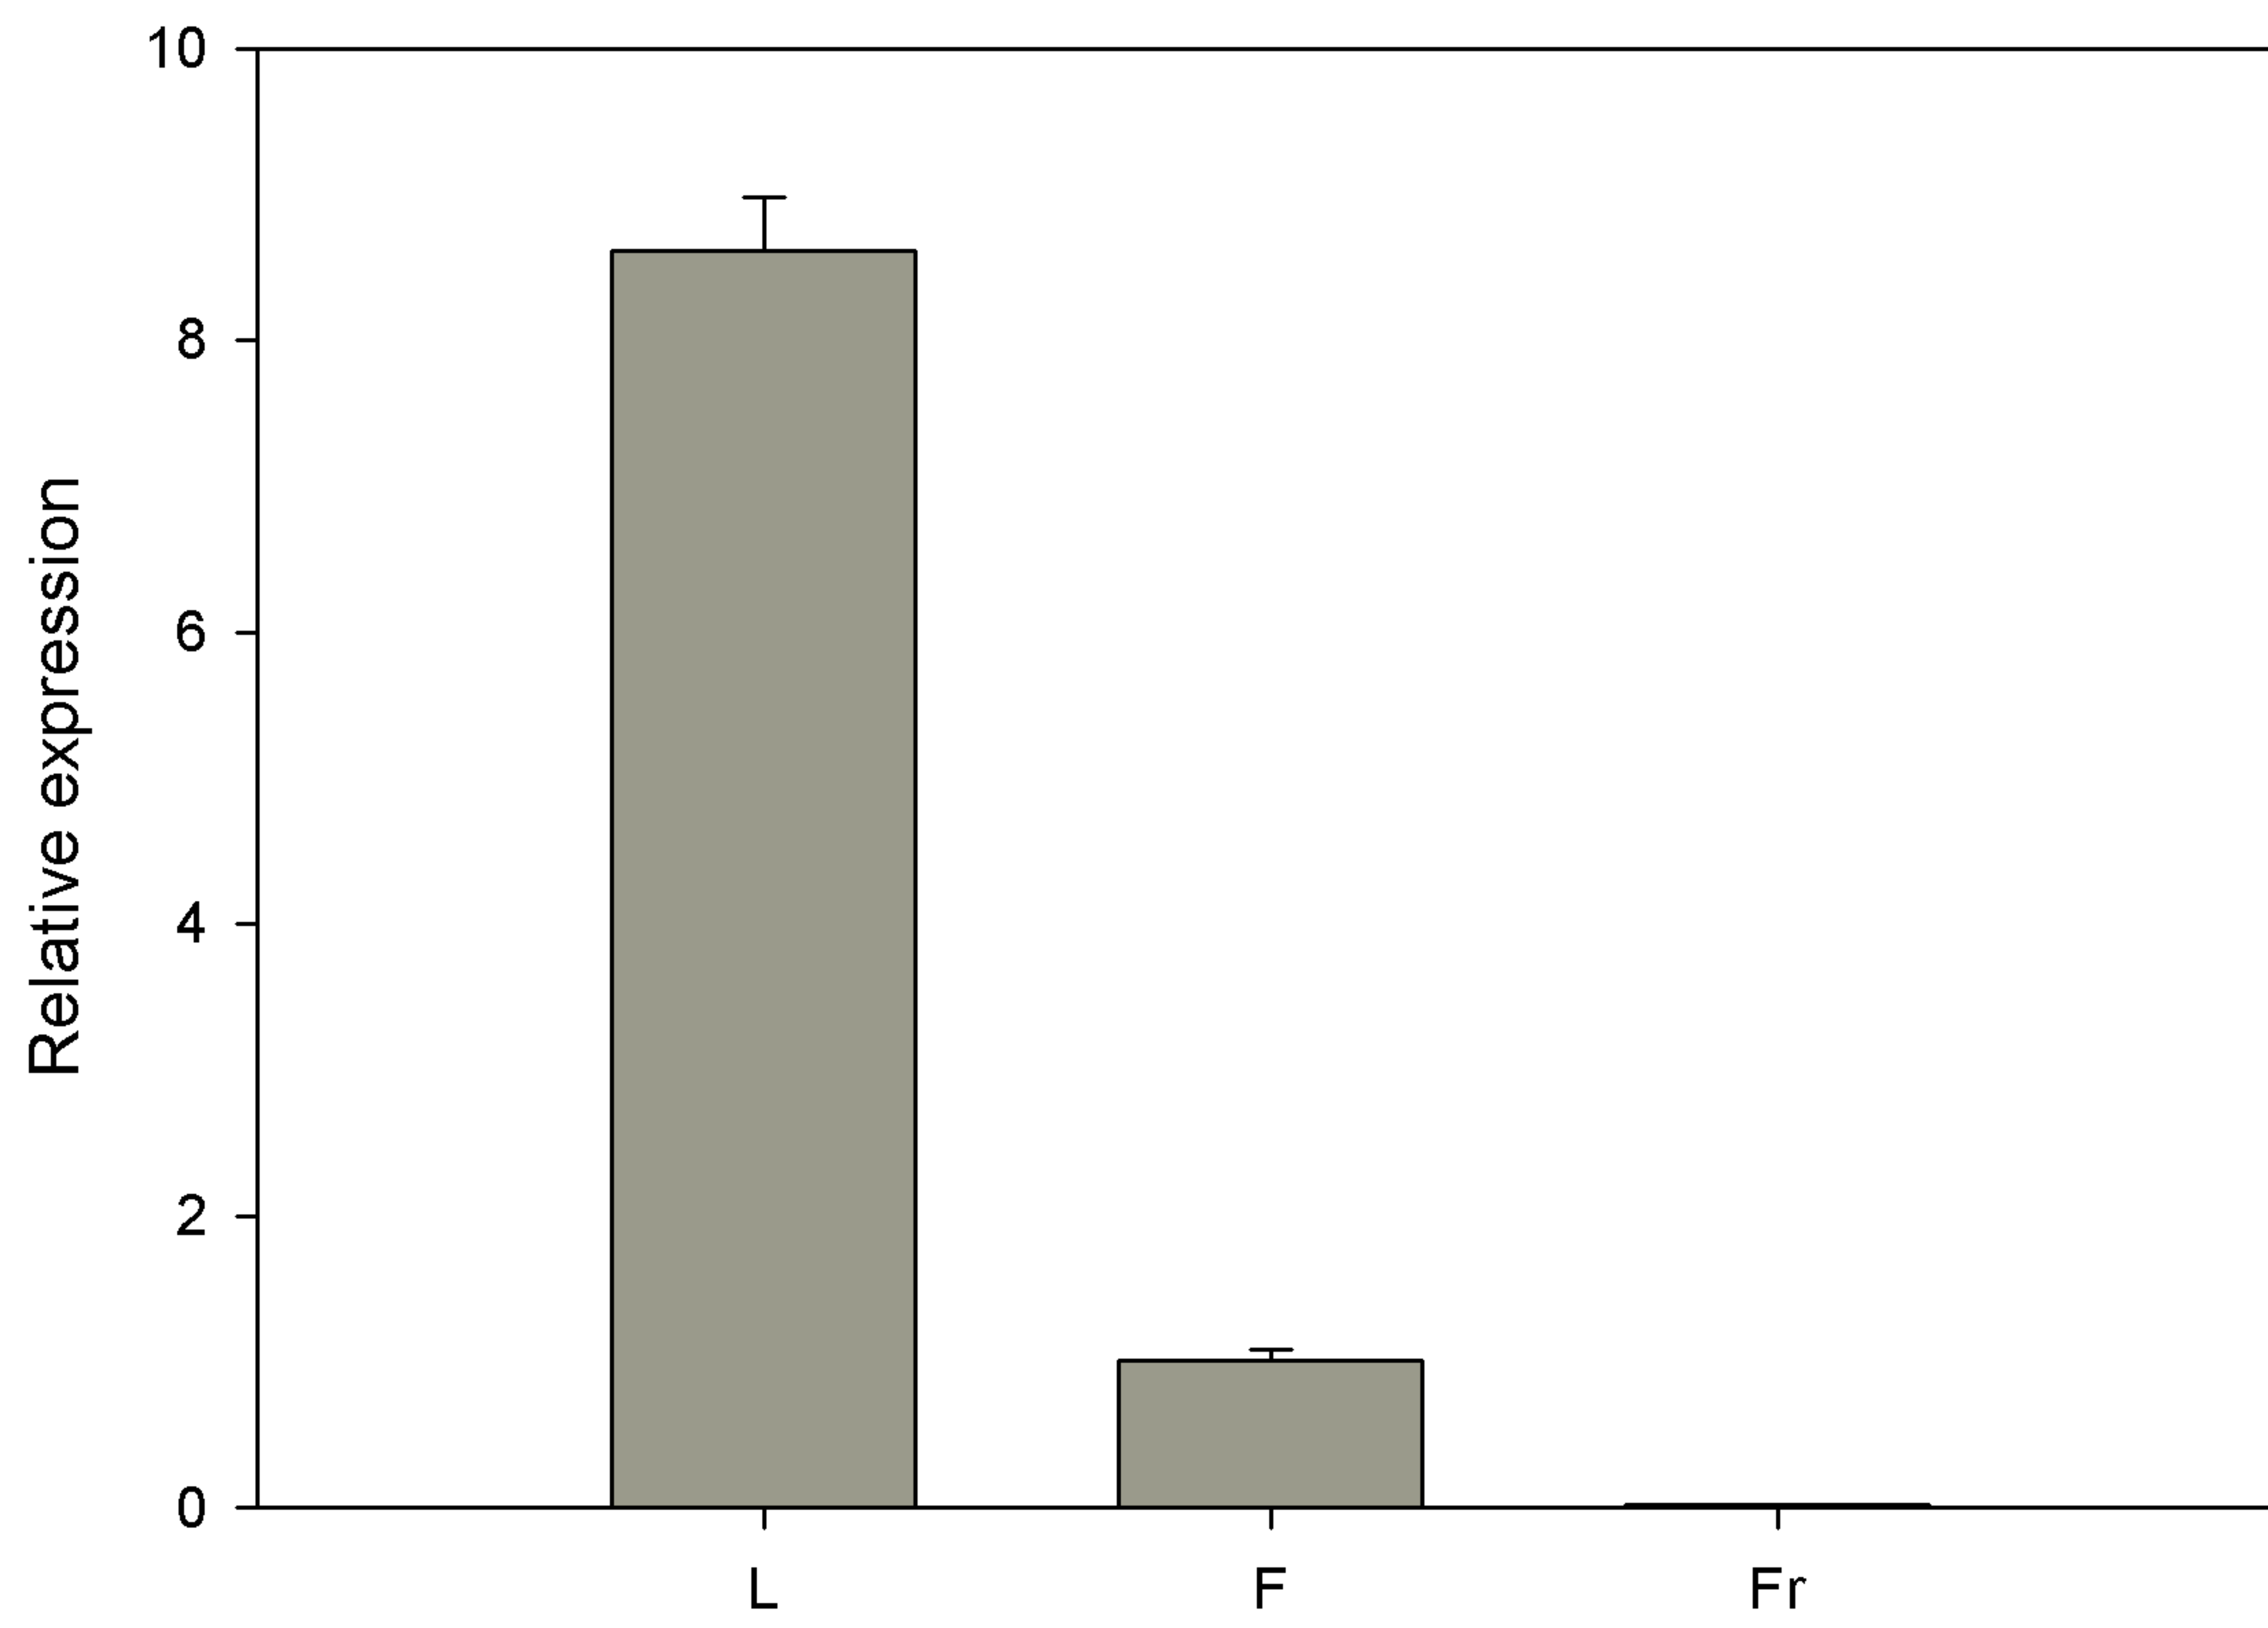

### Csi-miR162-3p.1

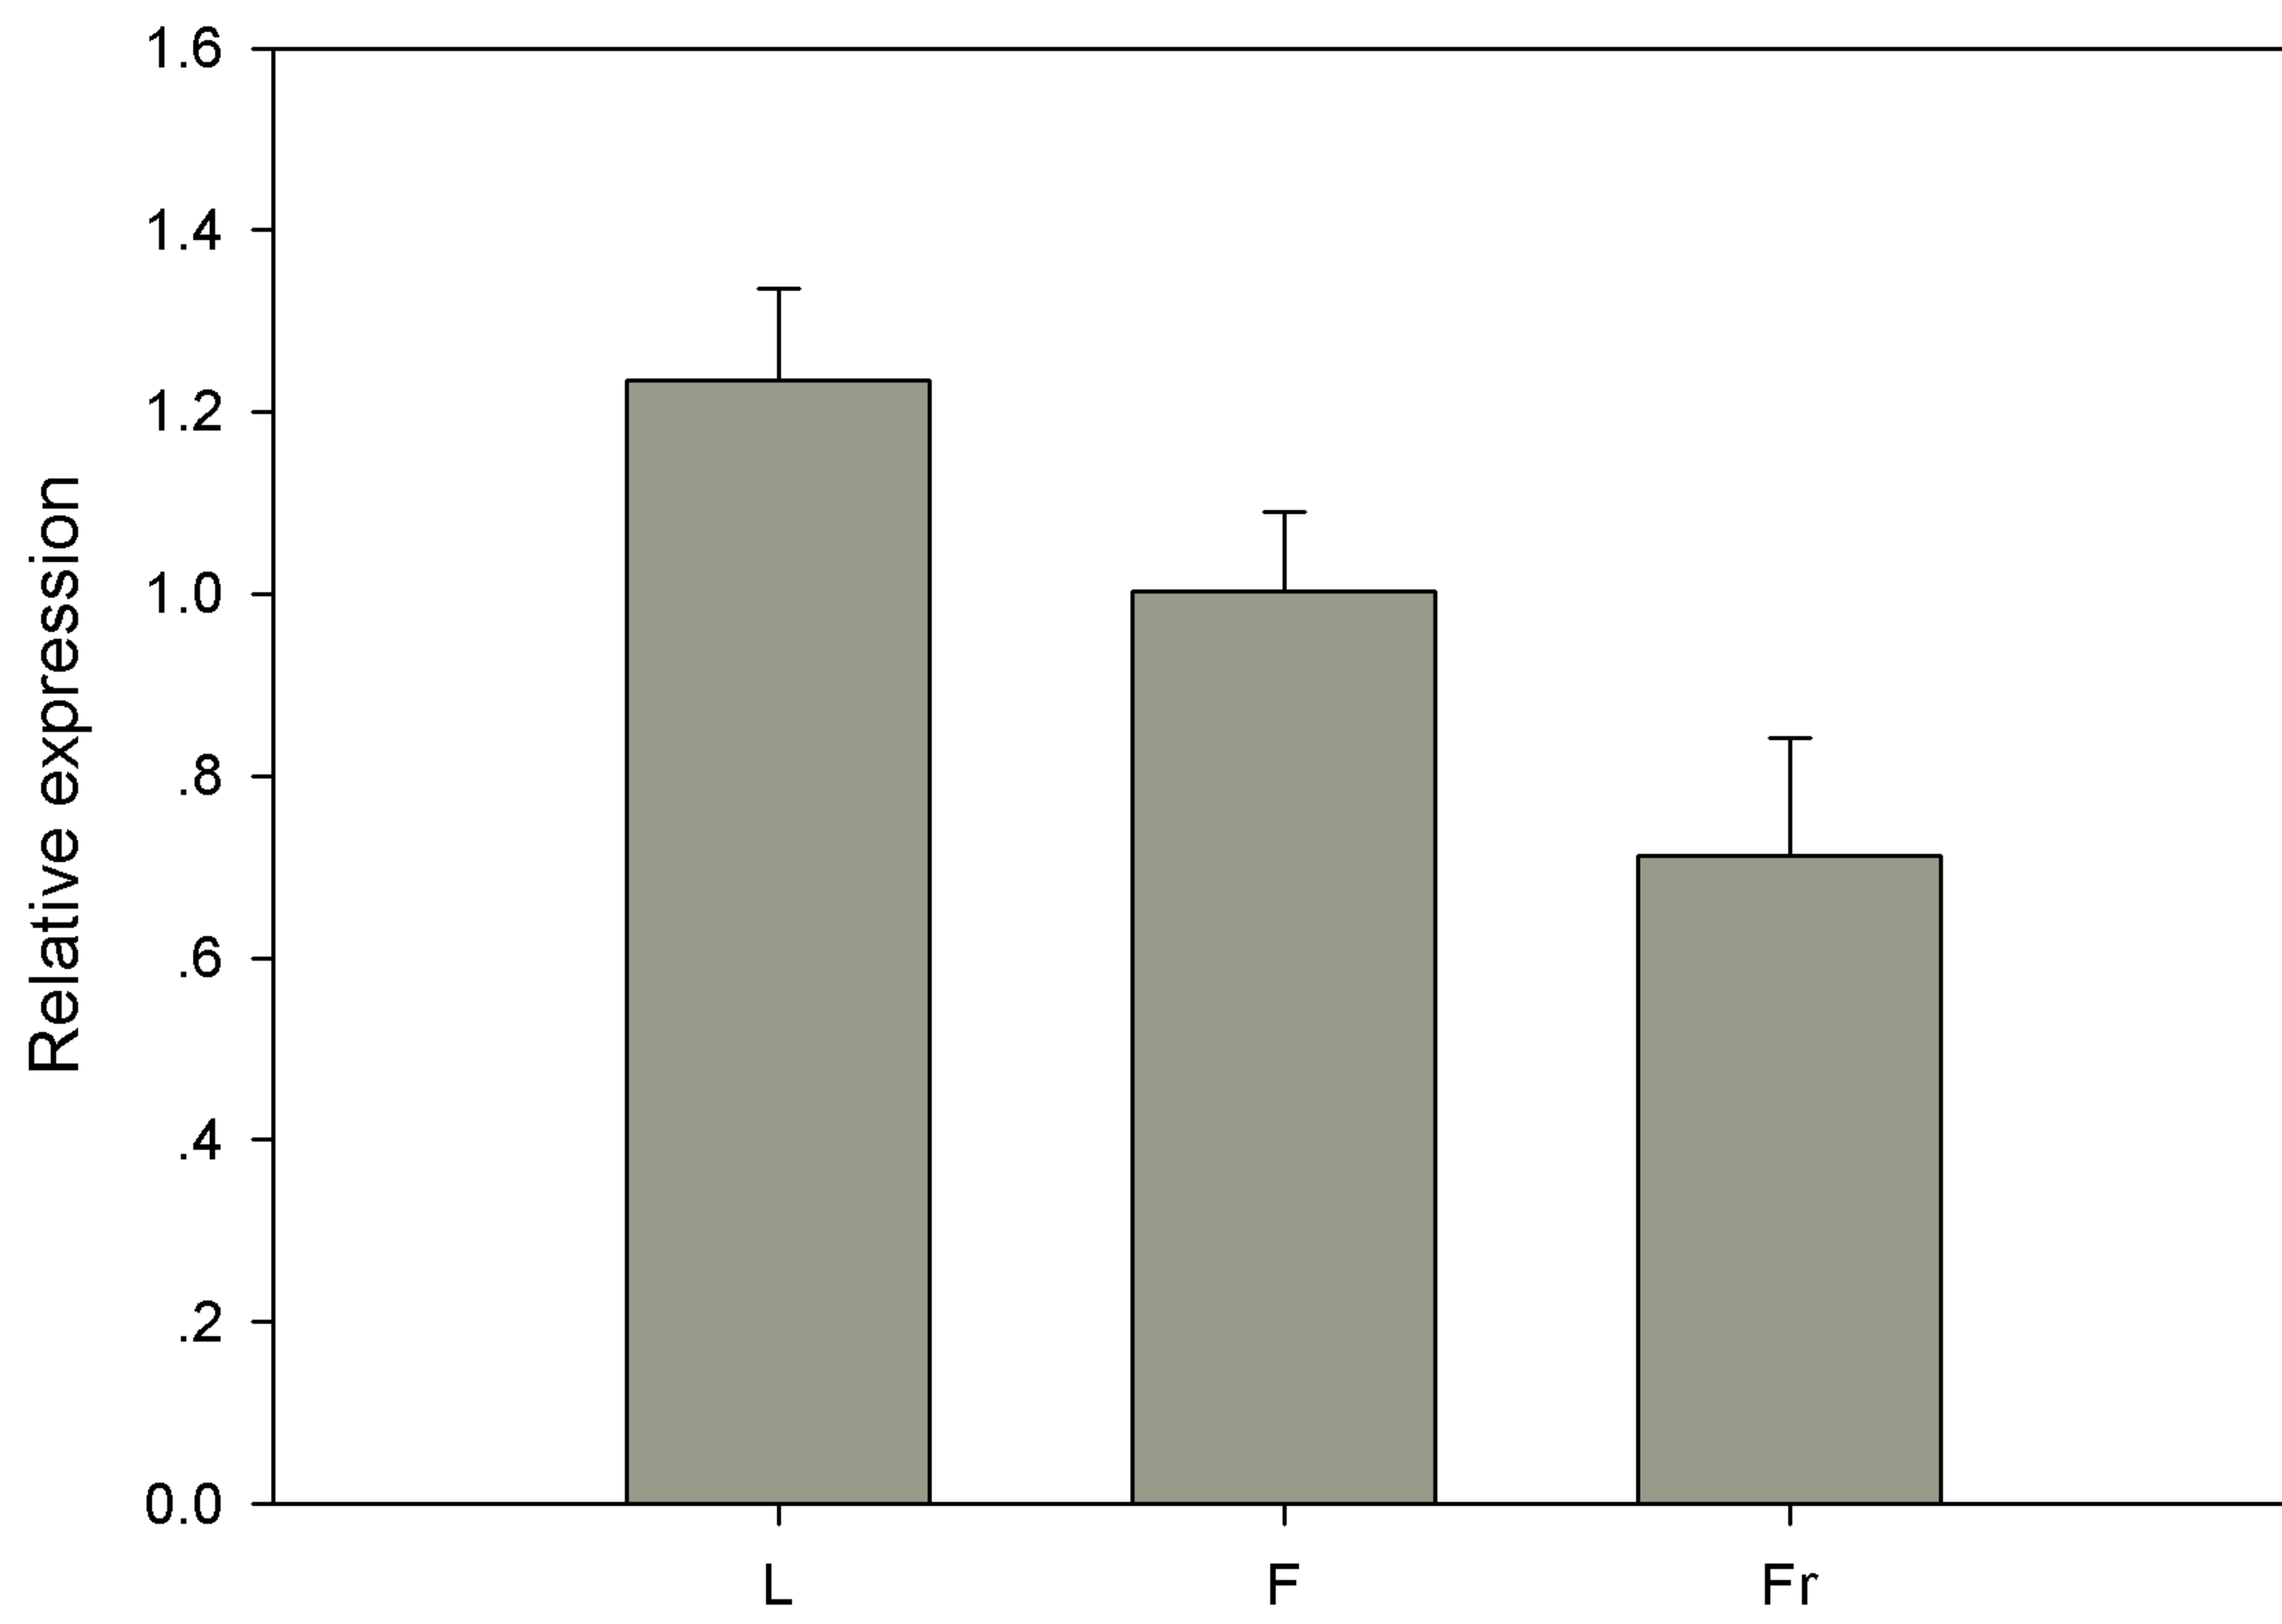

### Csi-miR164

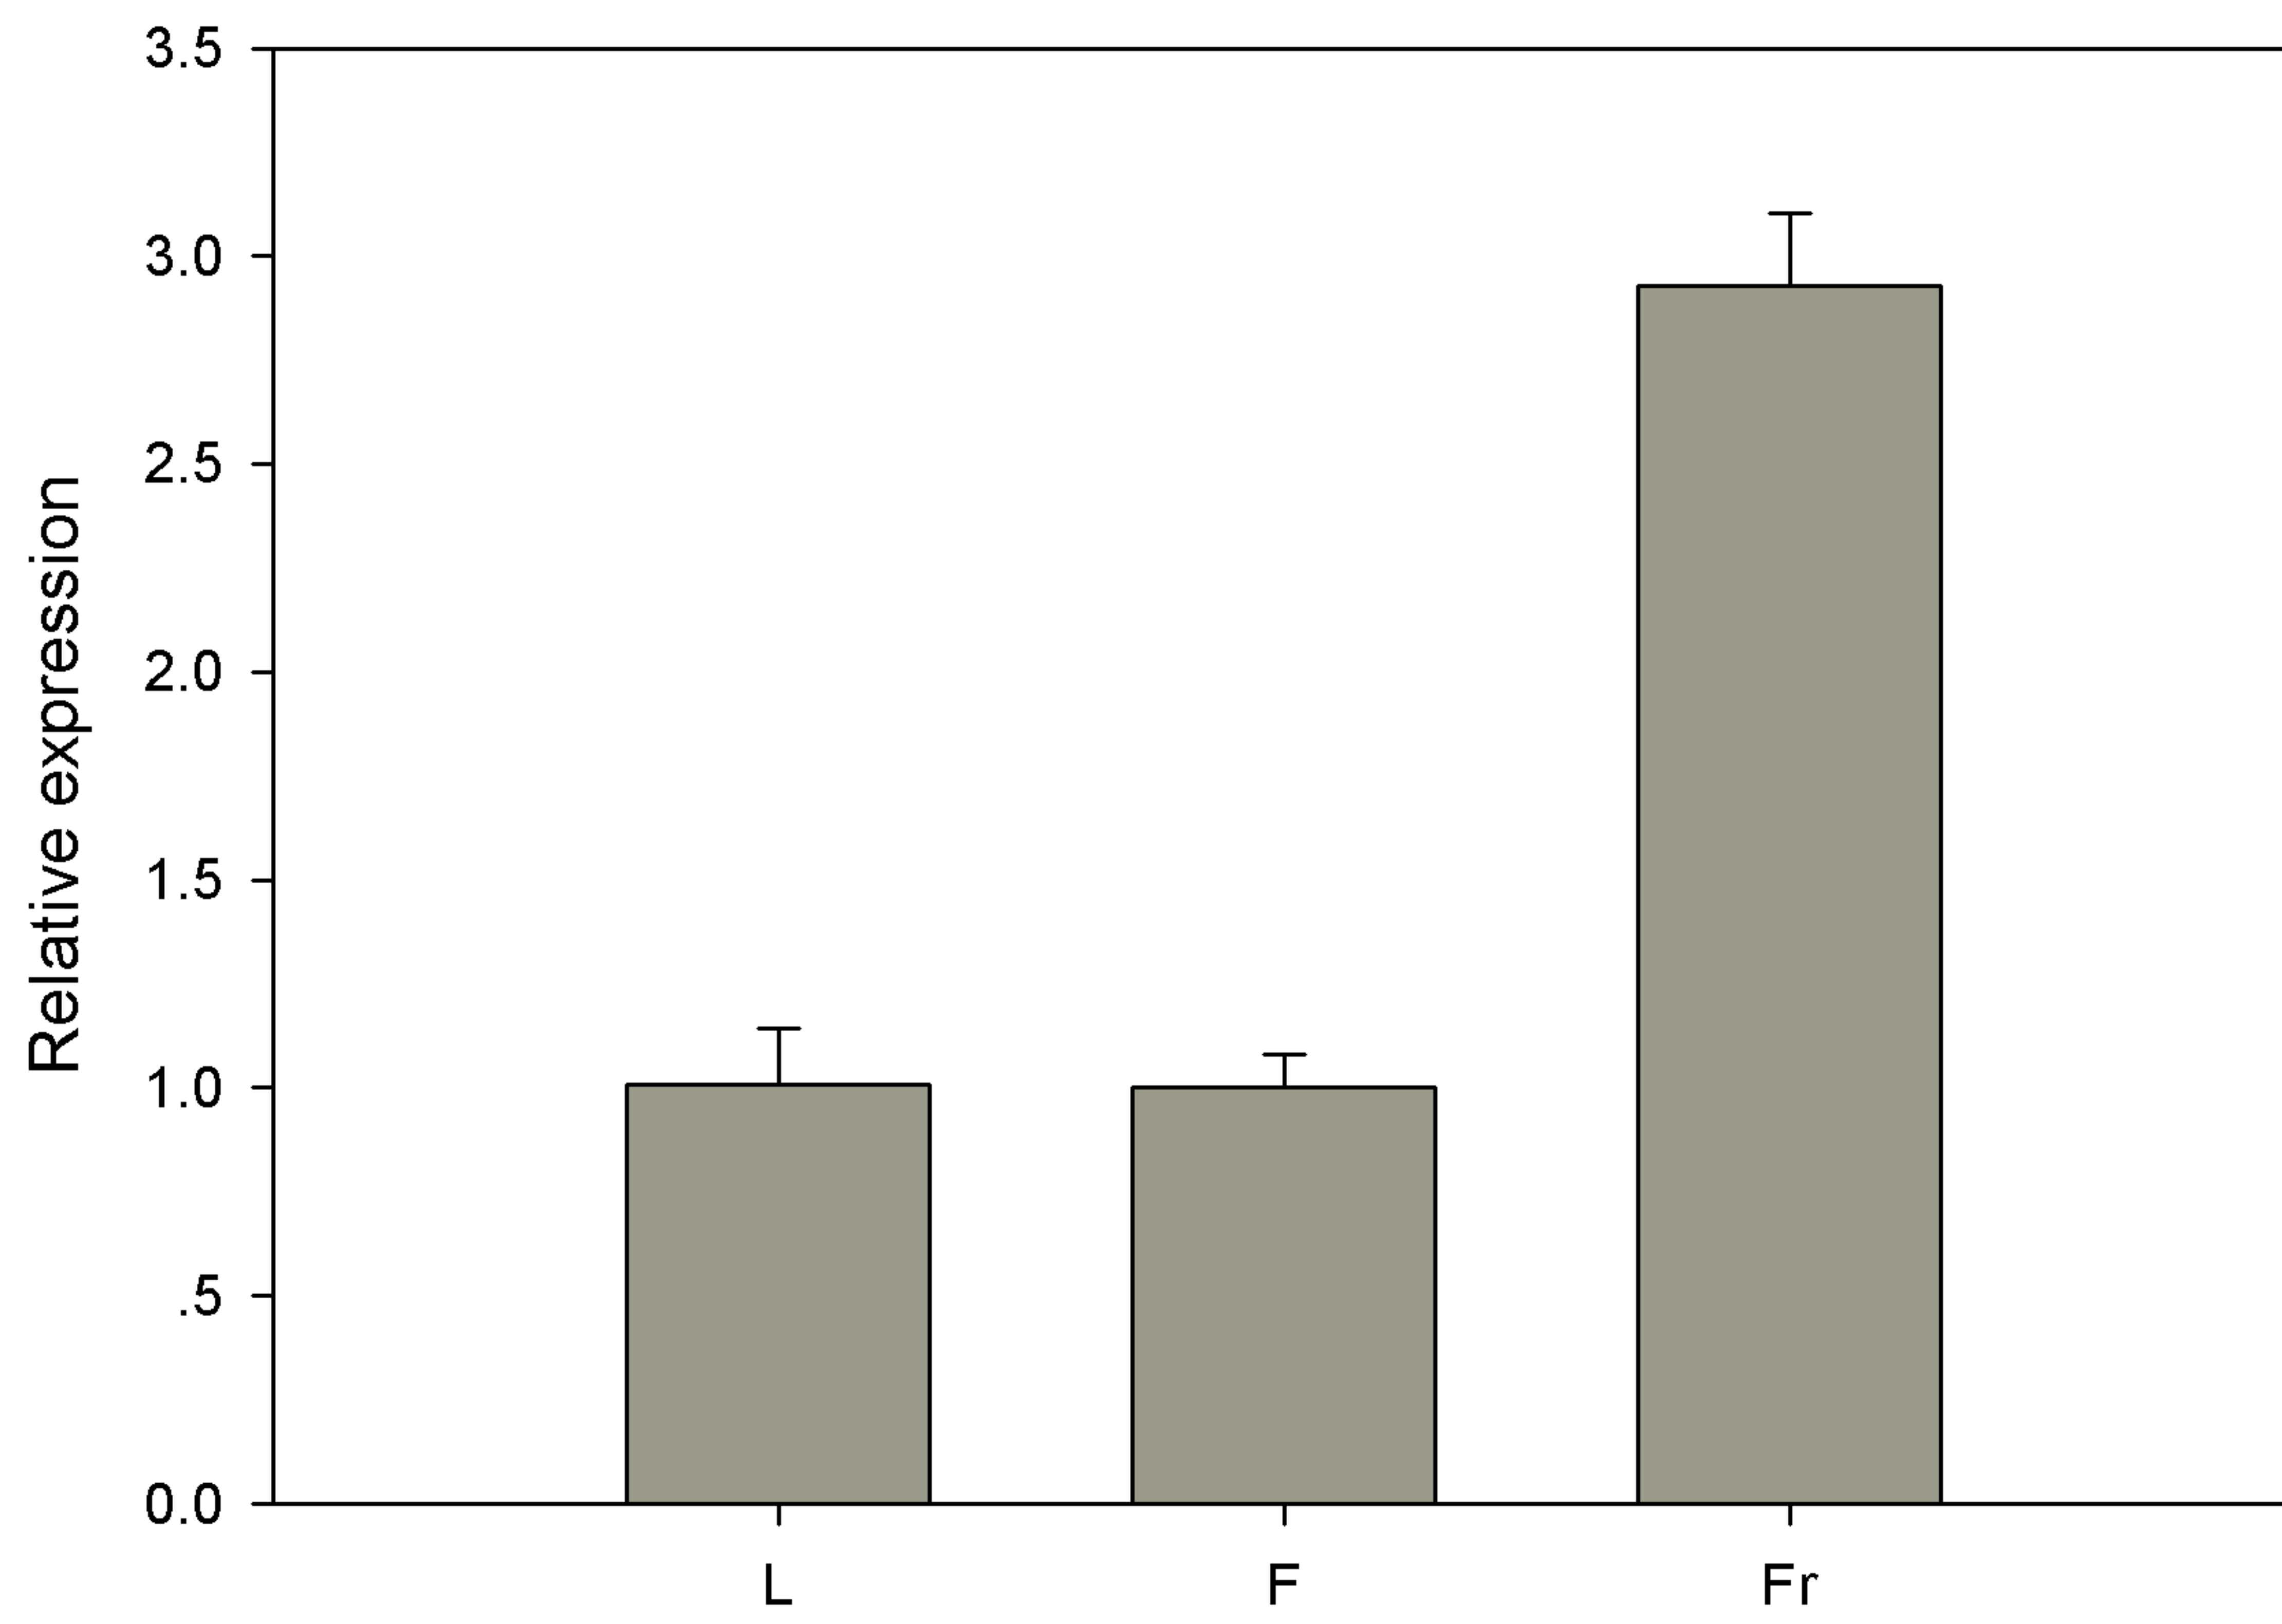

### Csi-miR166a.2

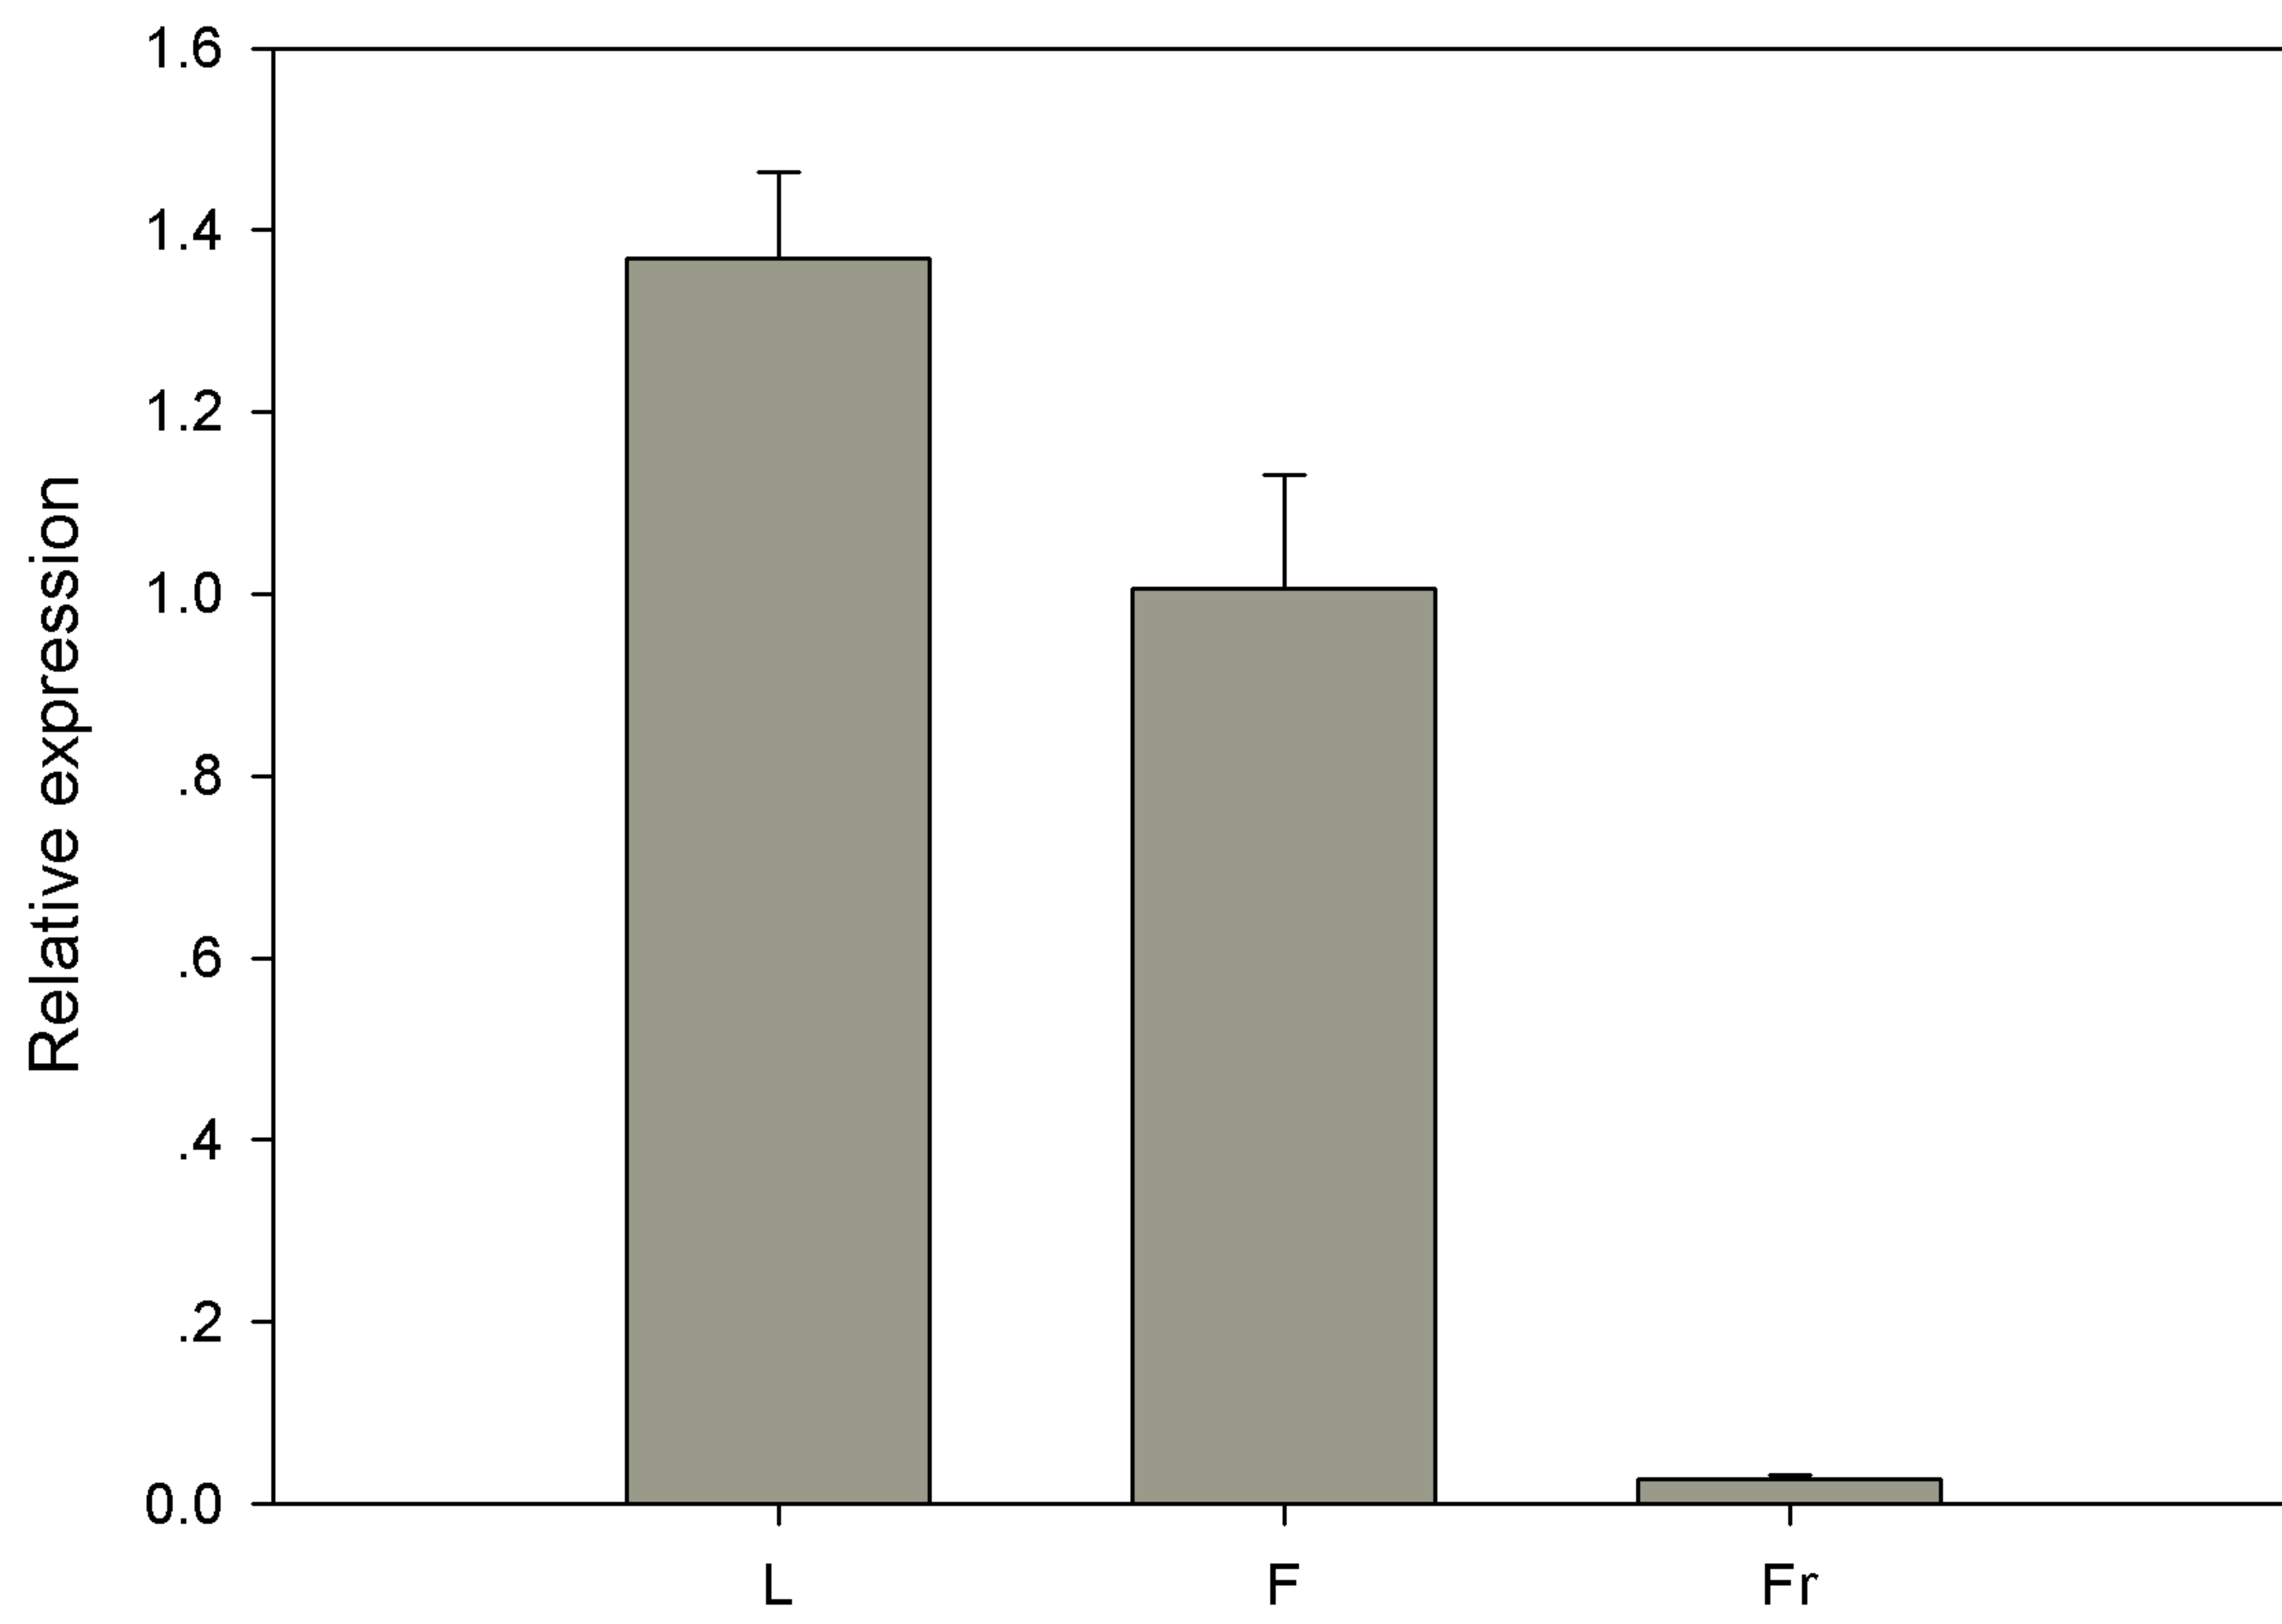

### Csi-miR166d.2

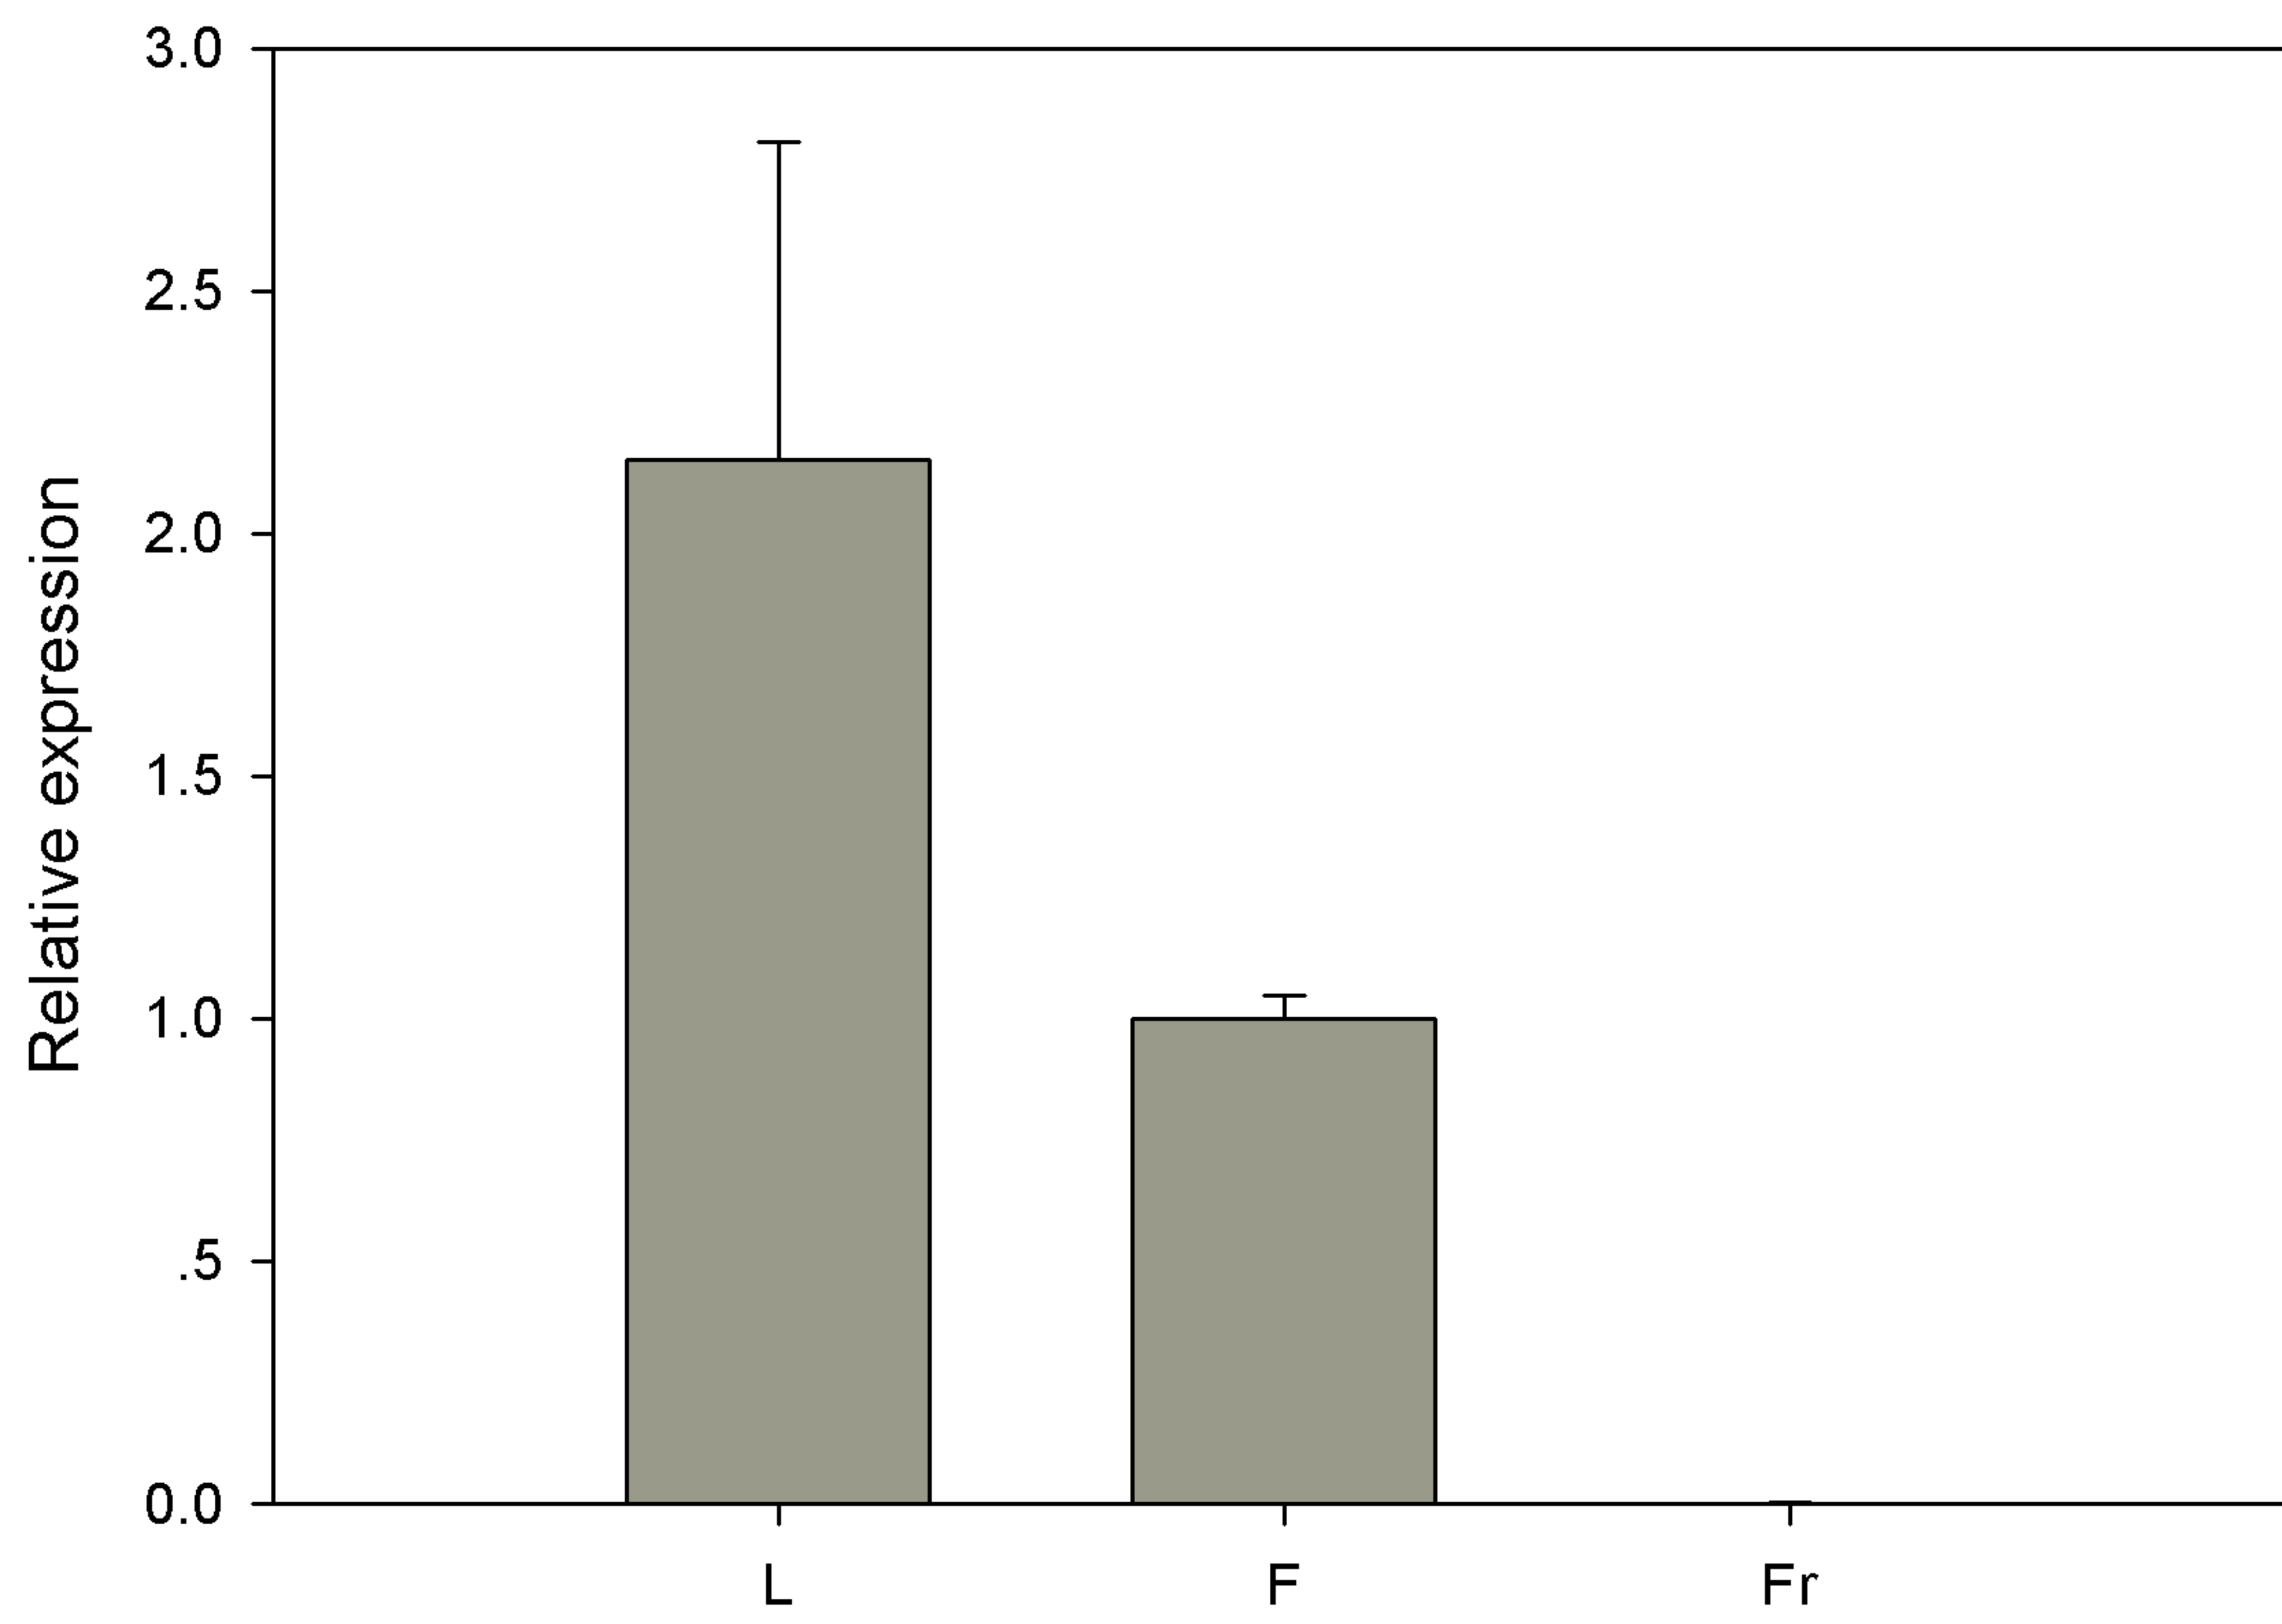

### Csi-miR166g.1

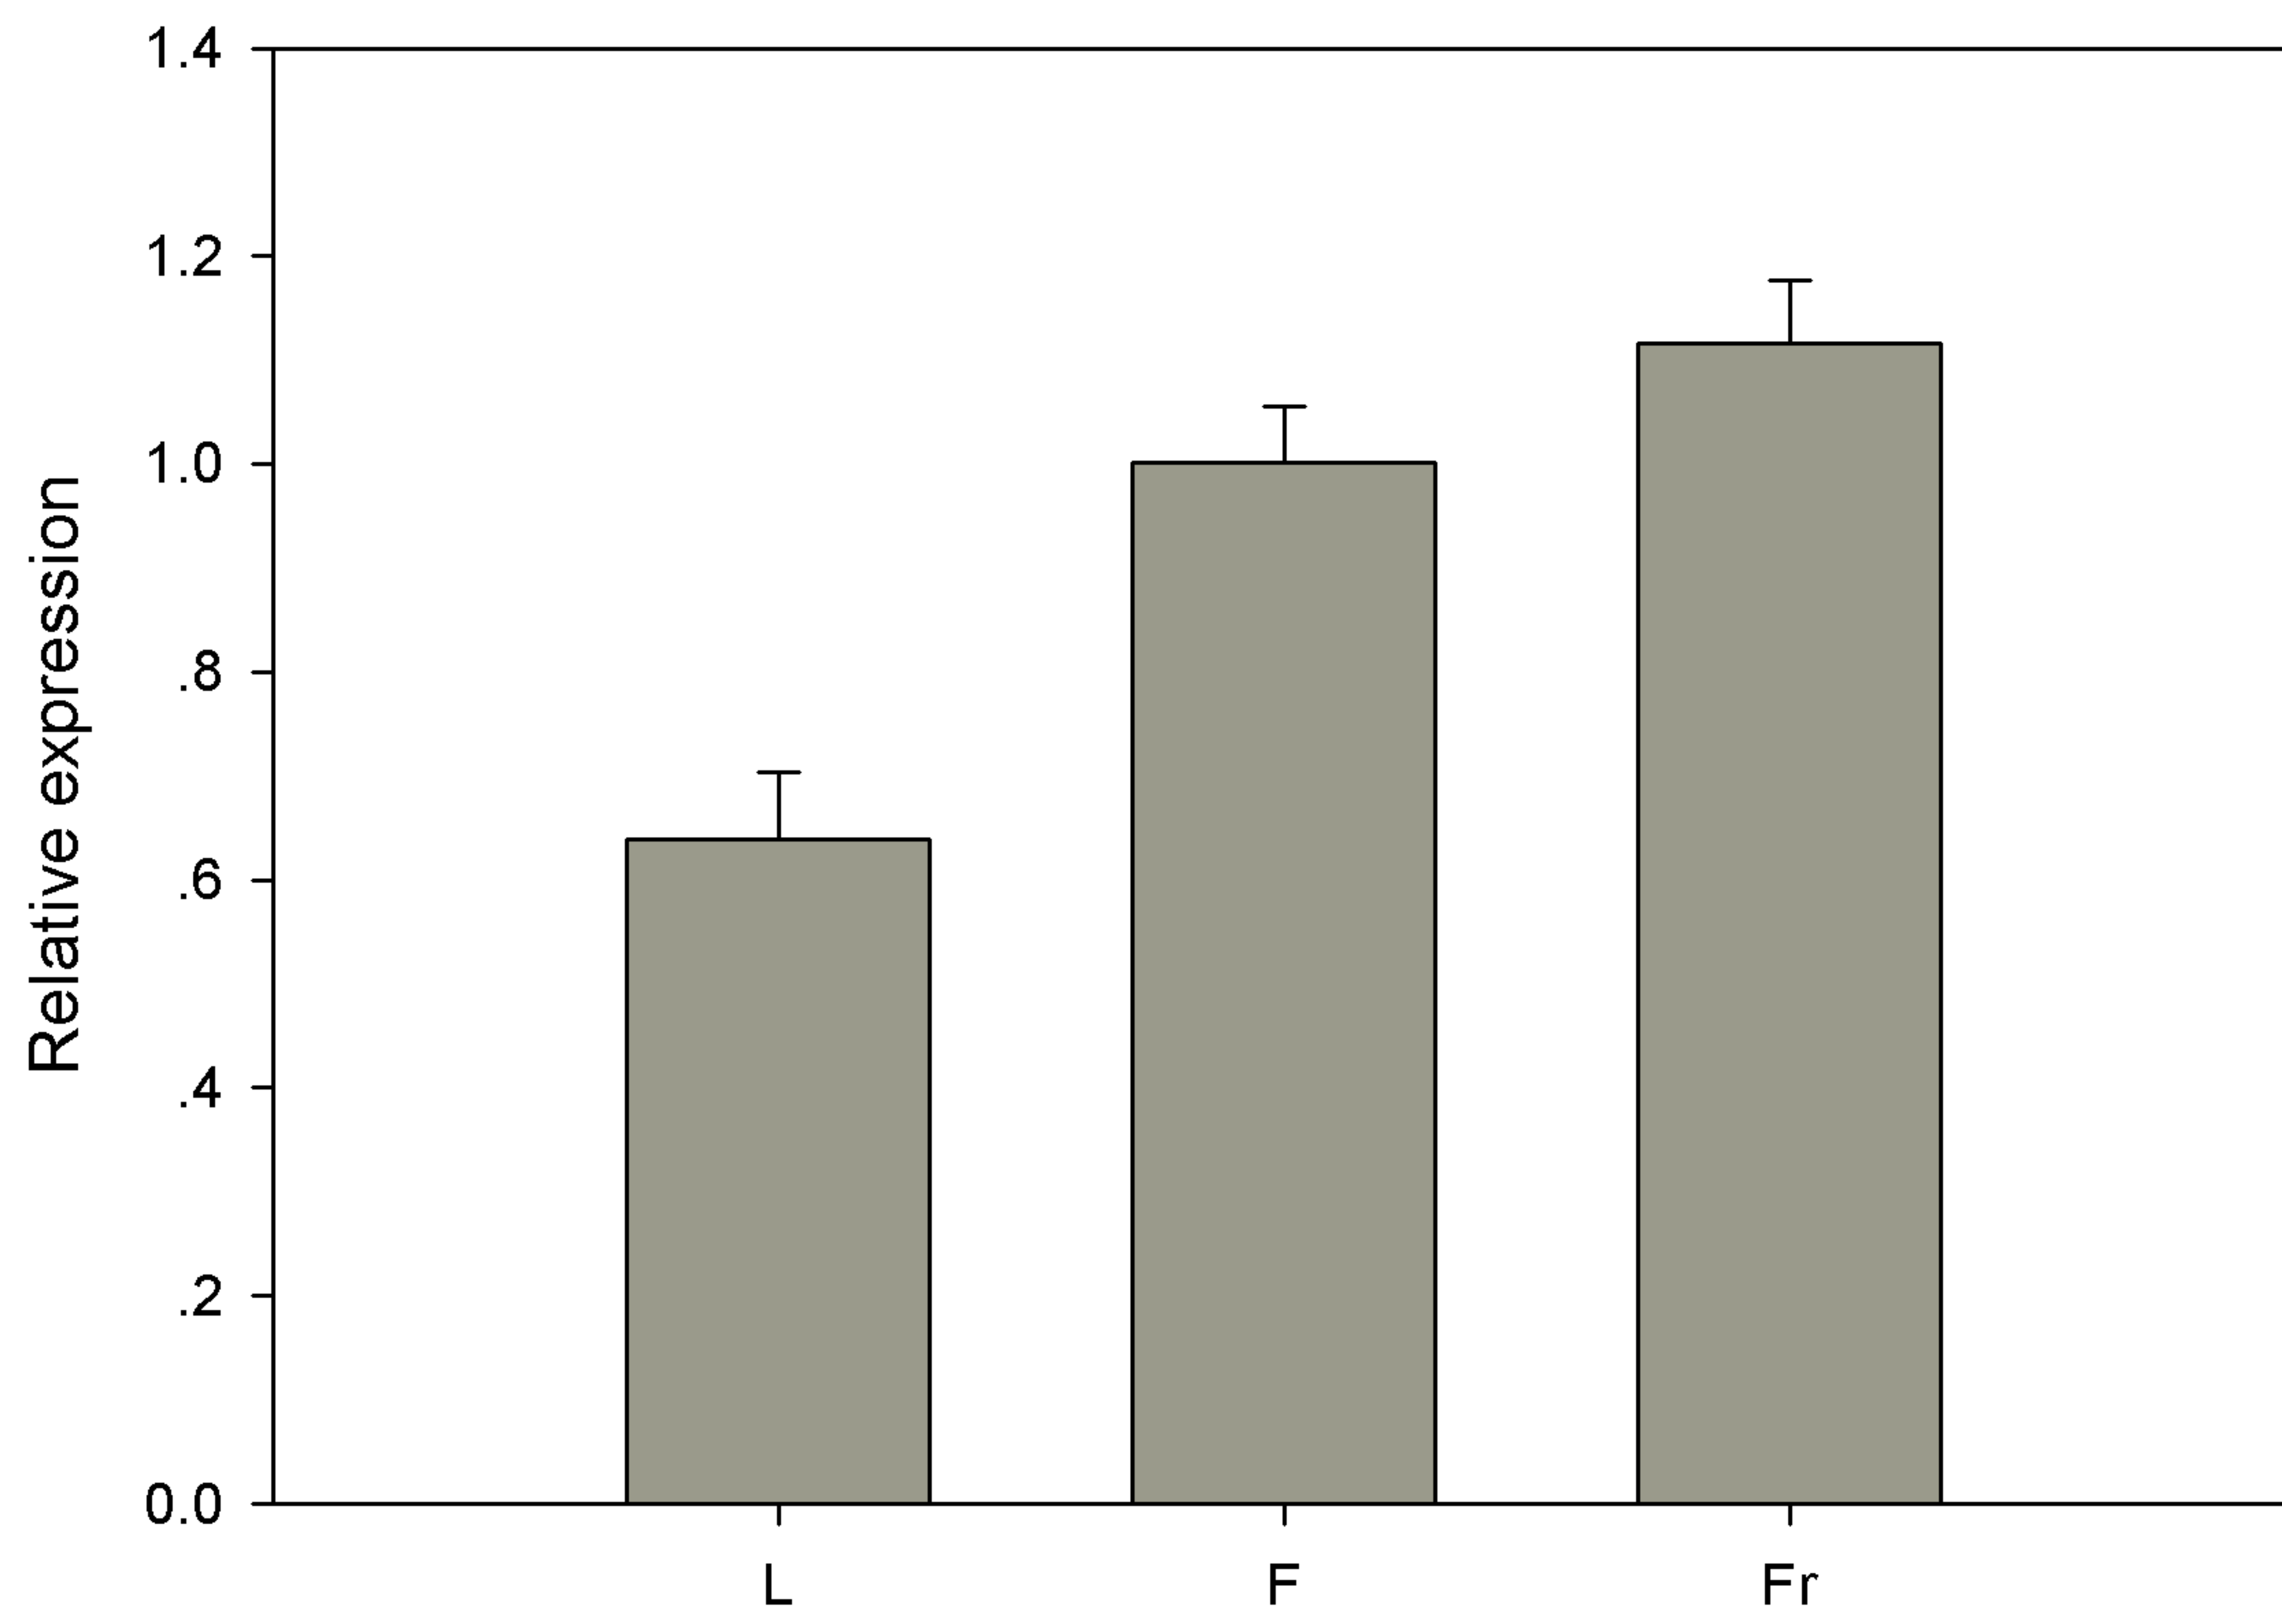

### Csi-miR166j.1

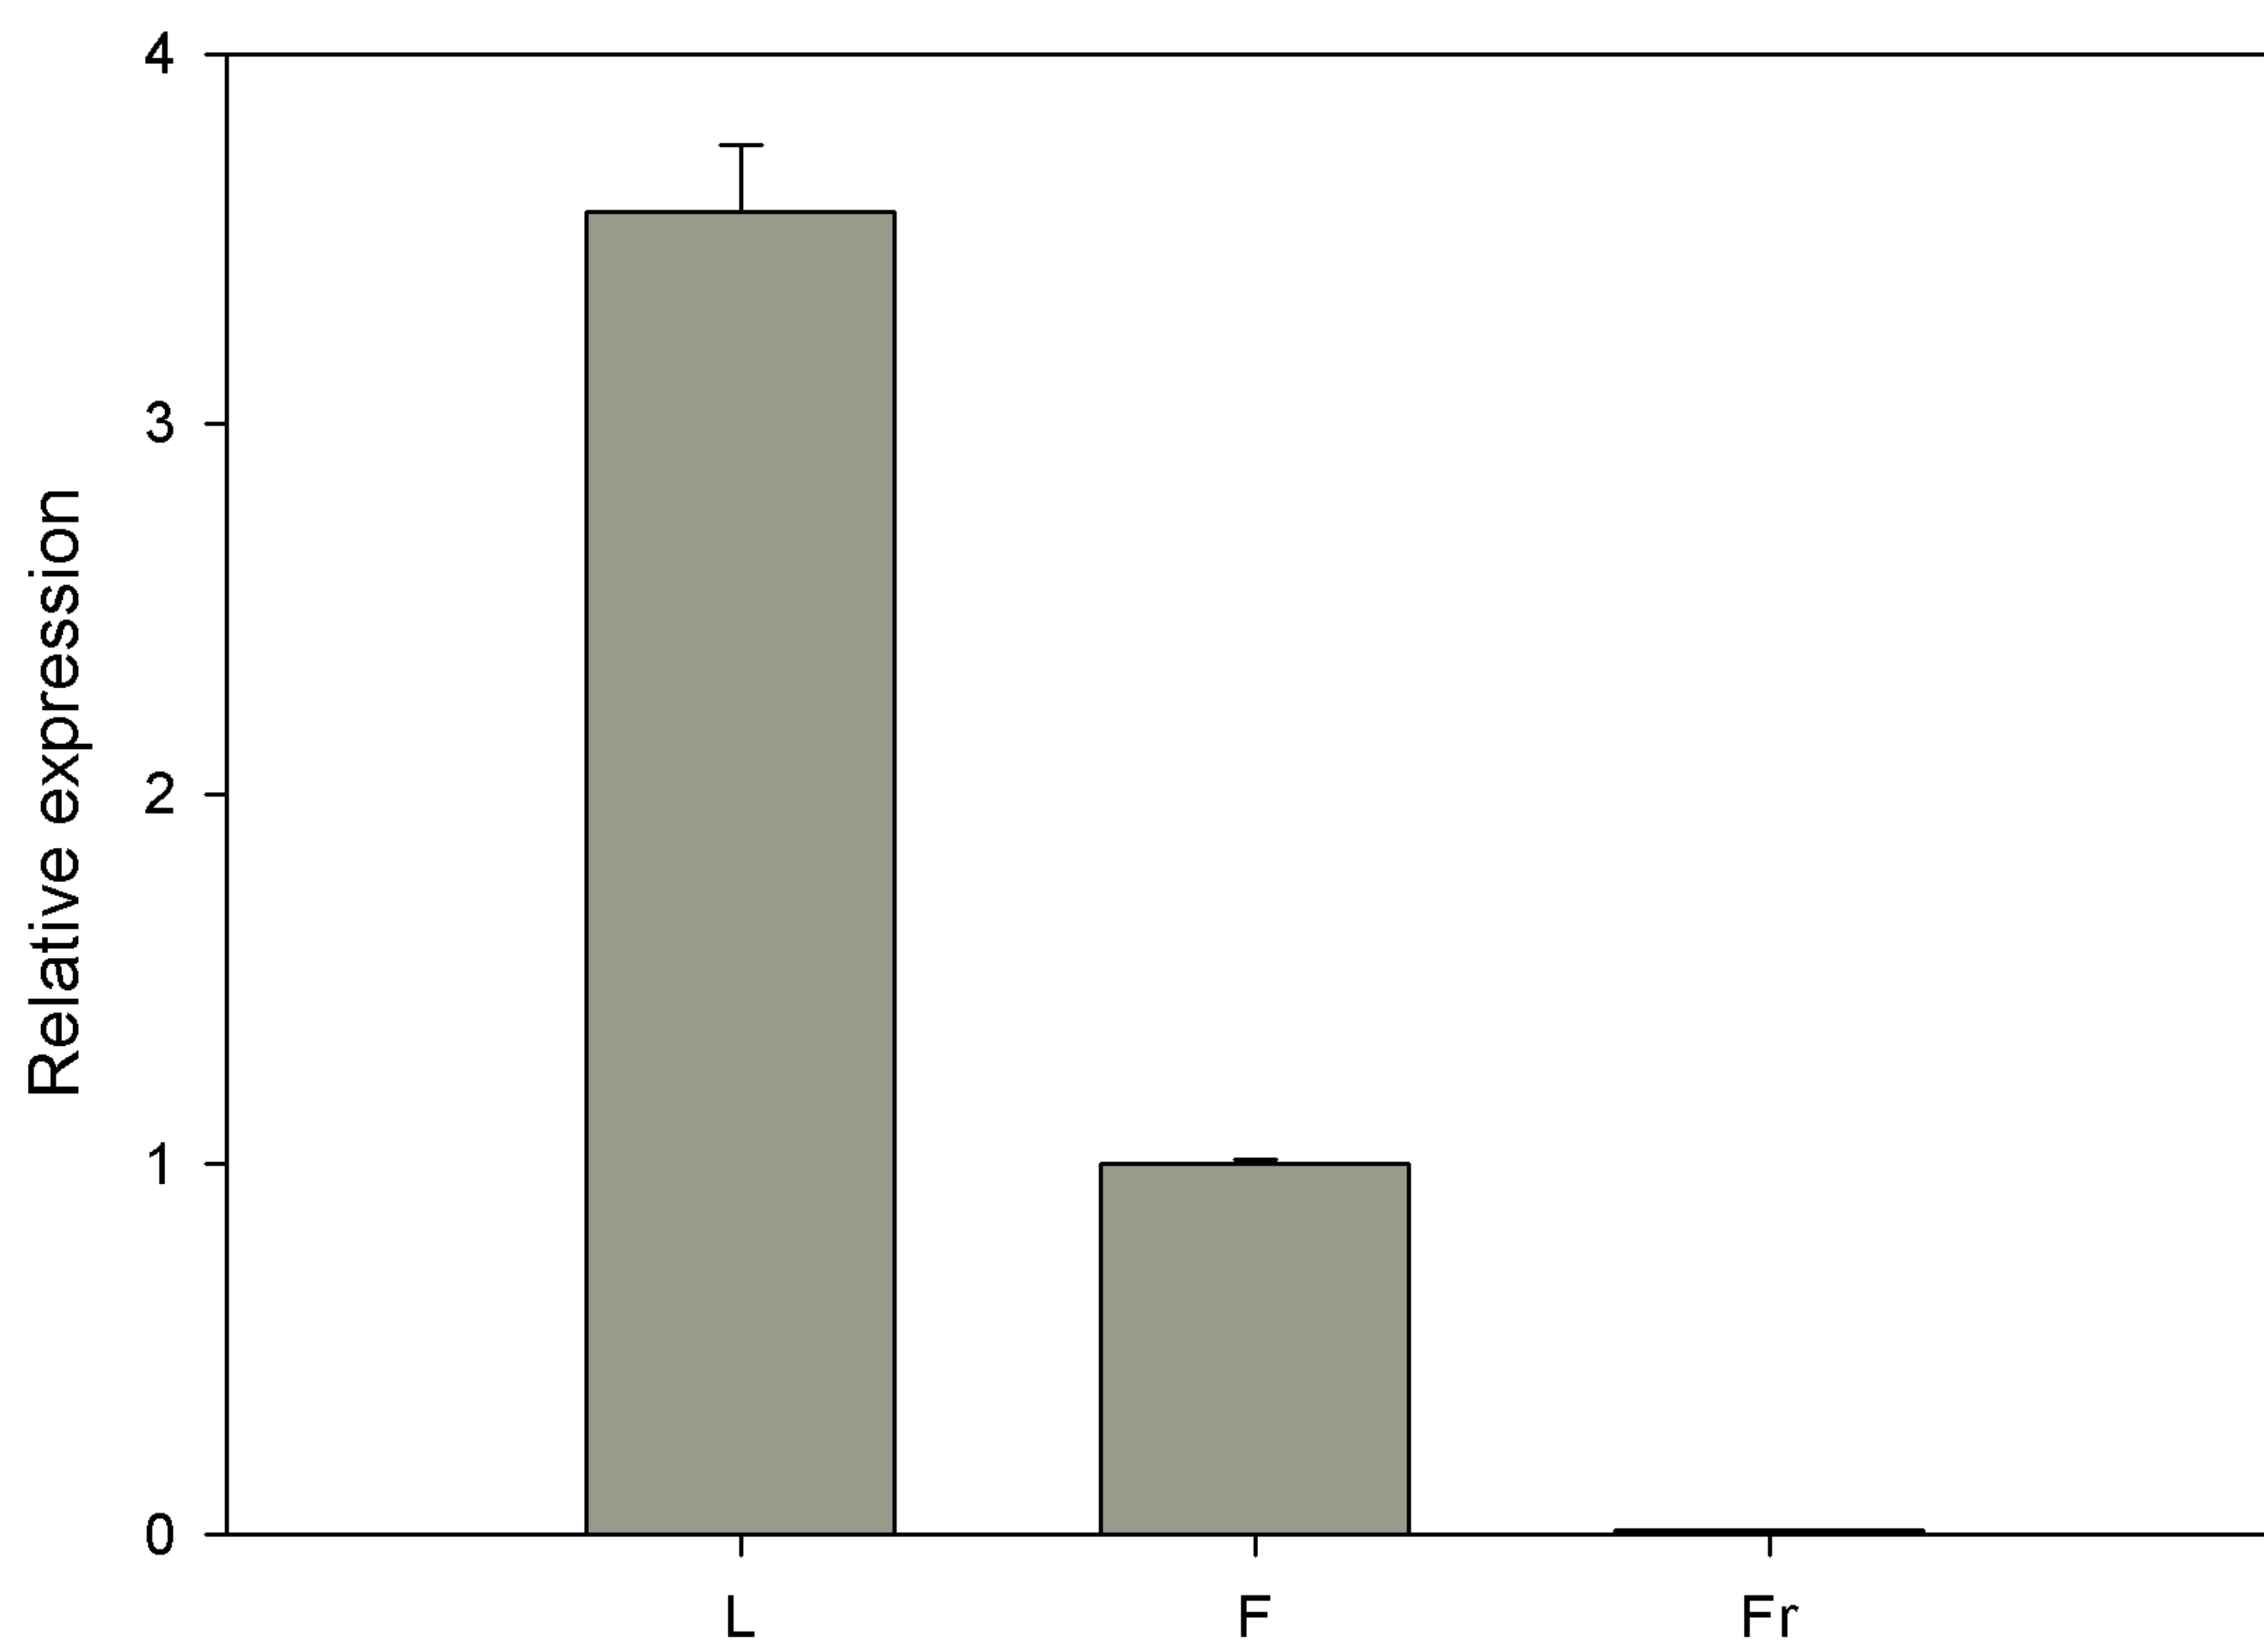

### Csi-miR166j.3

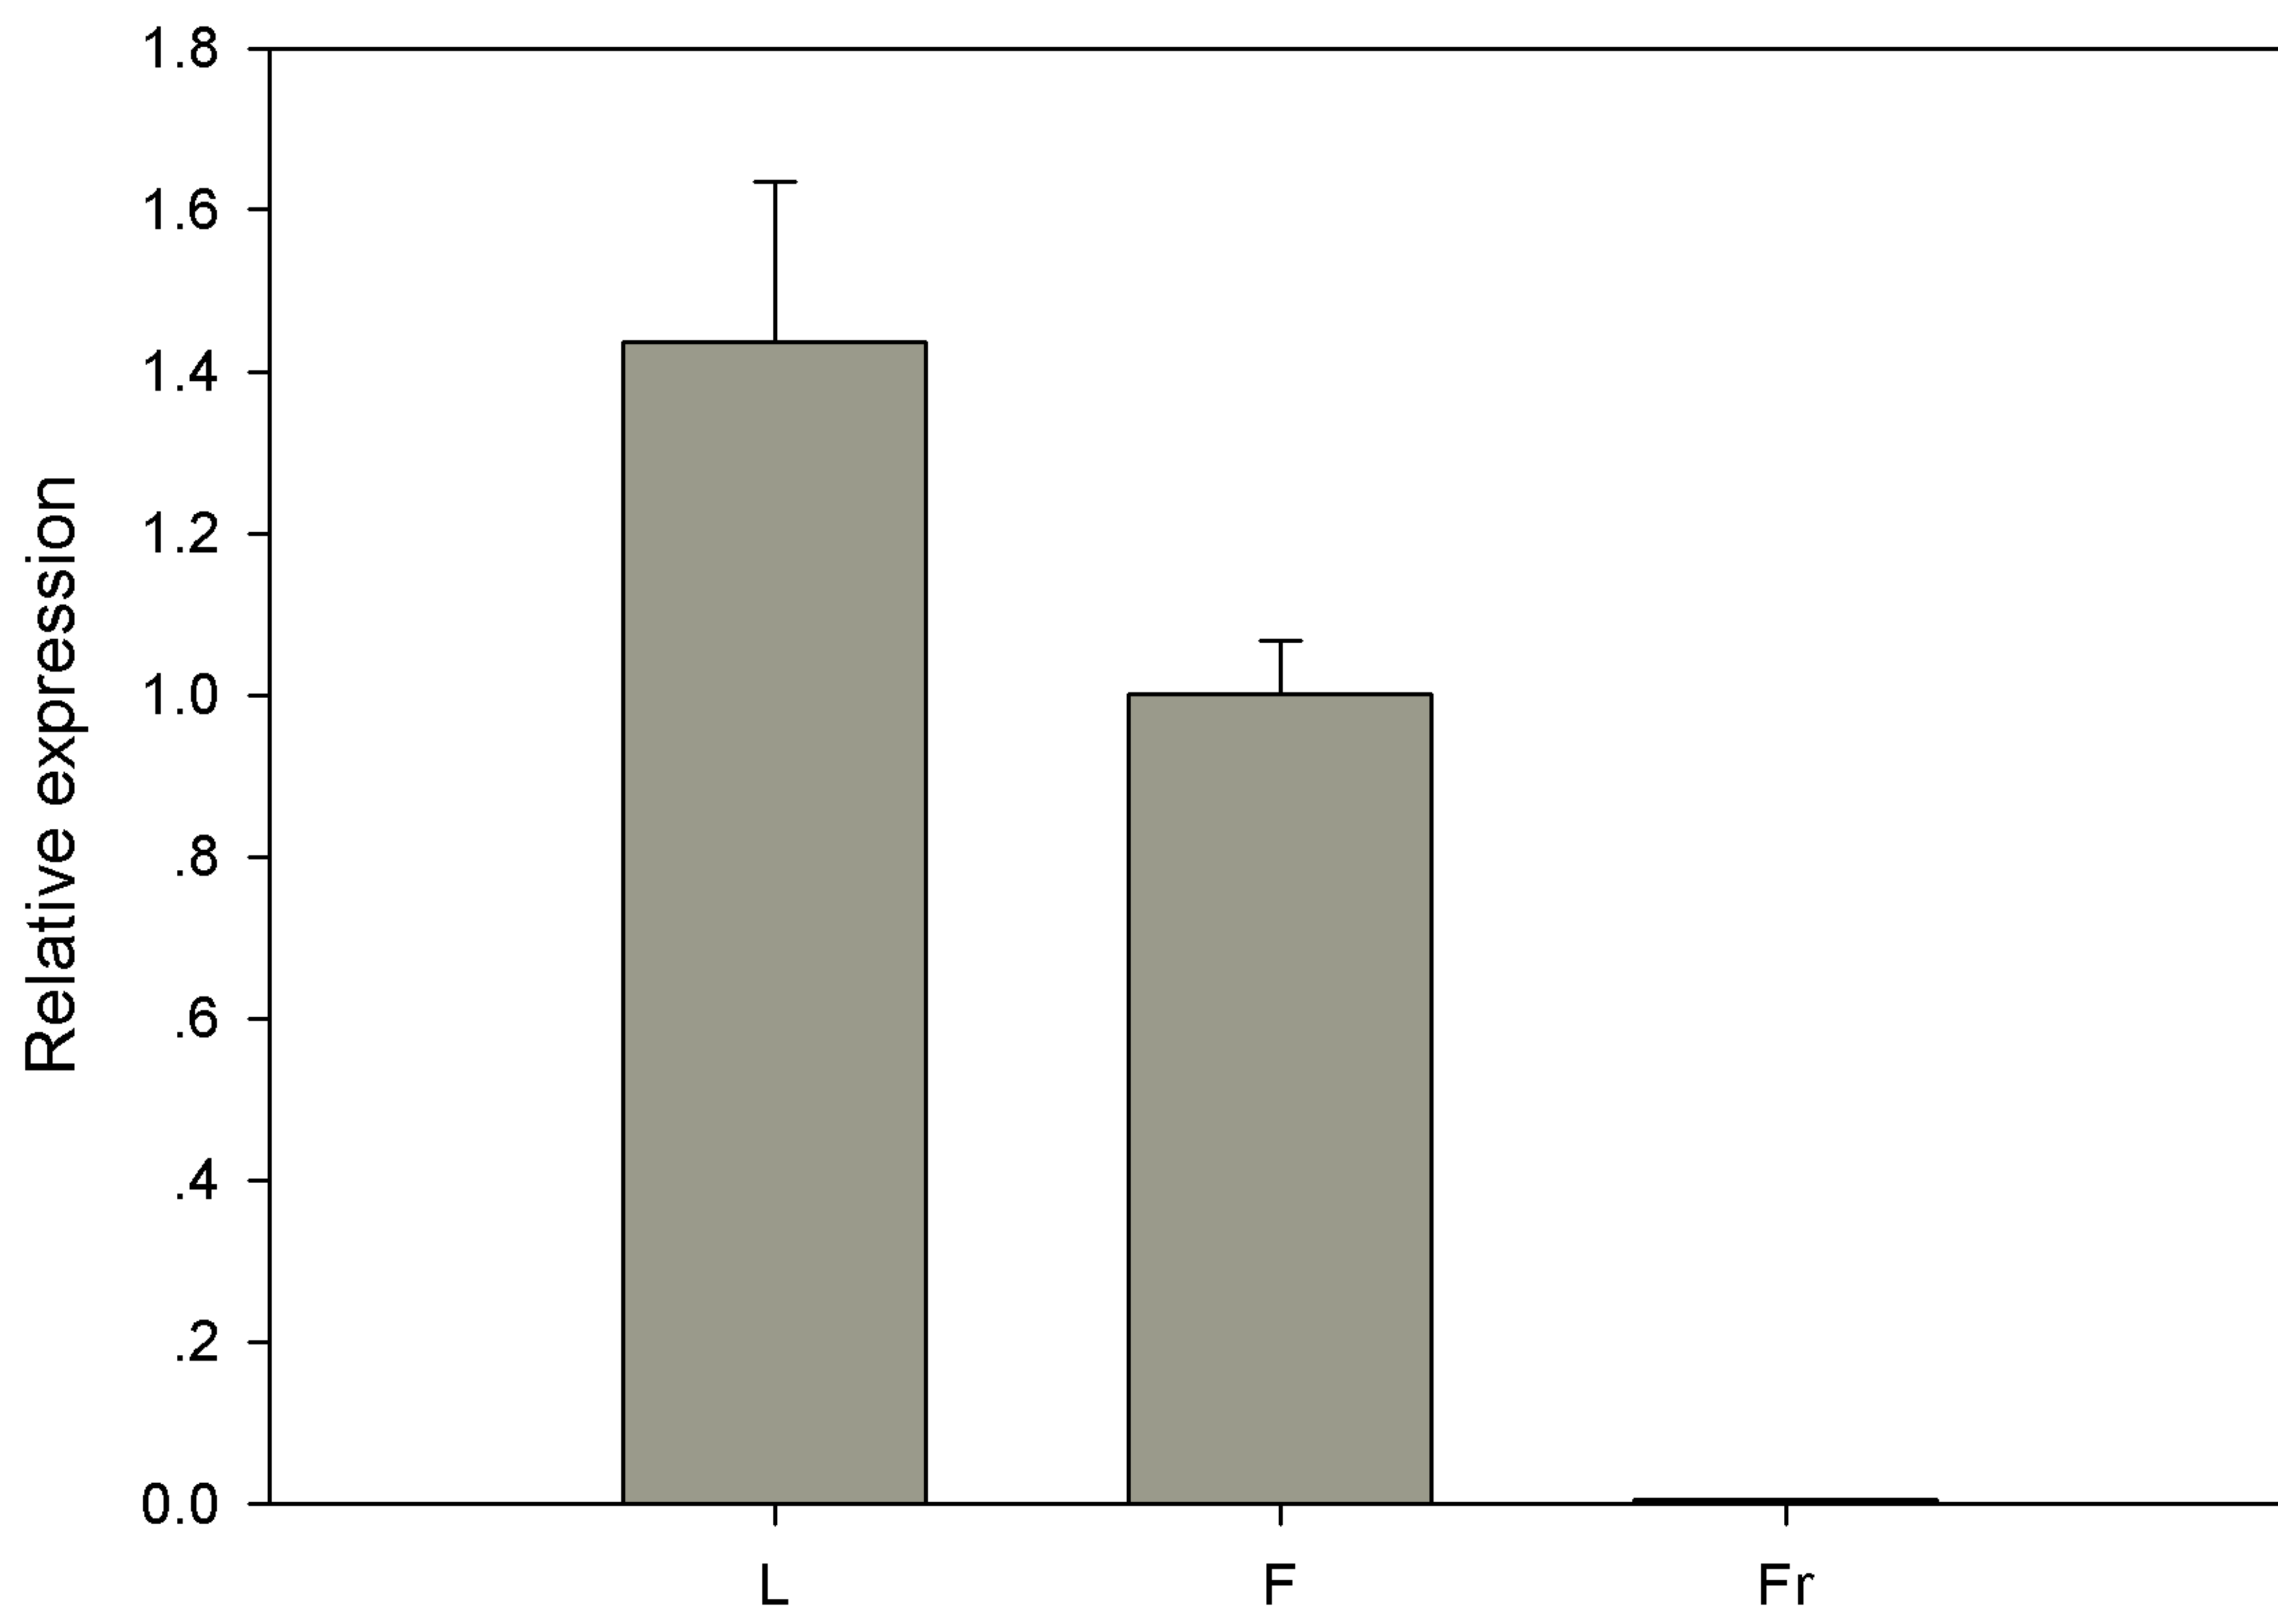



### Csi-miR167b.2

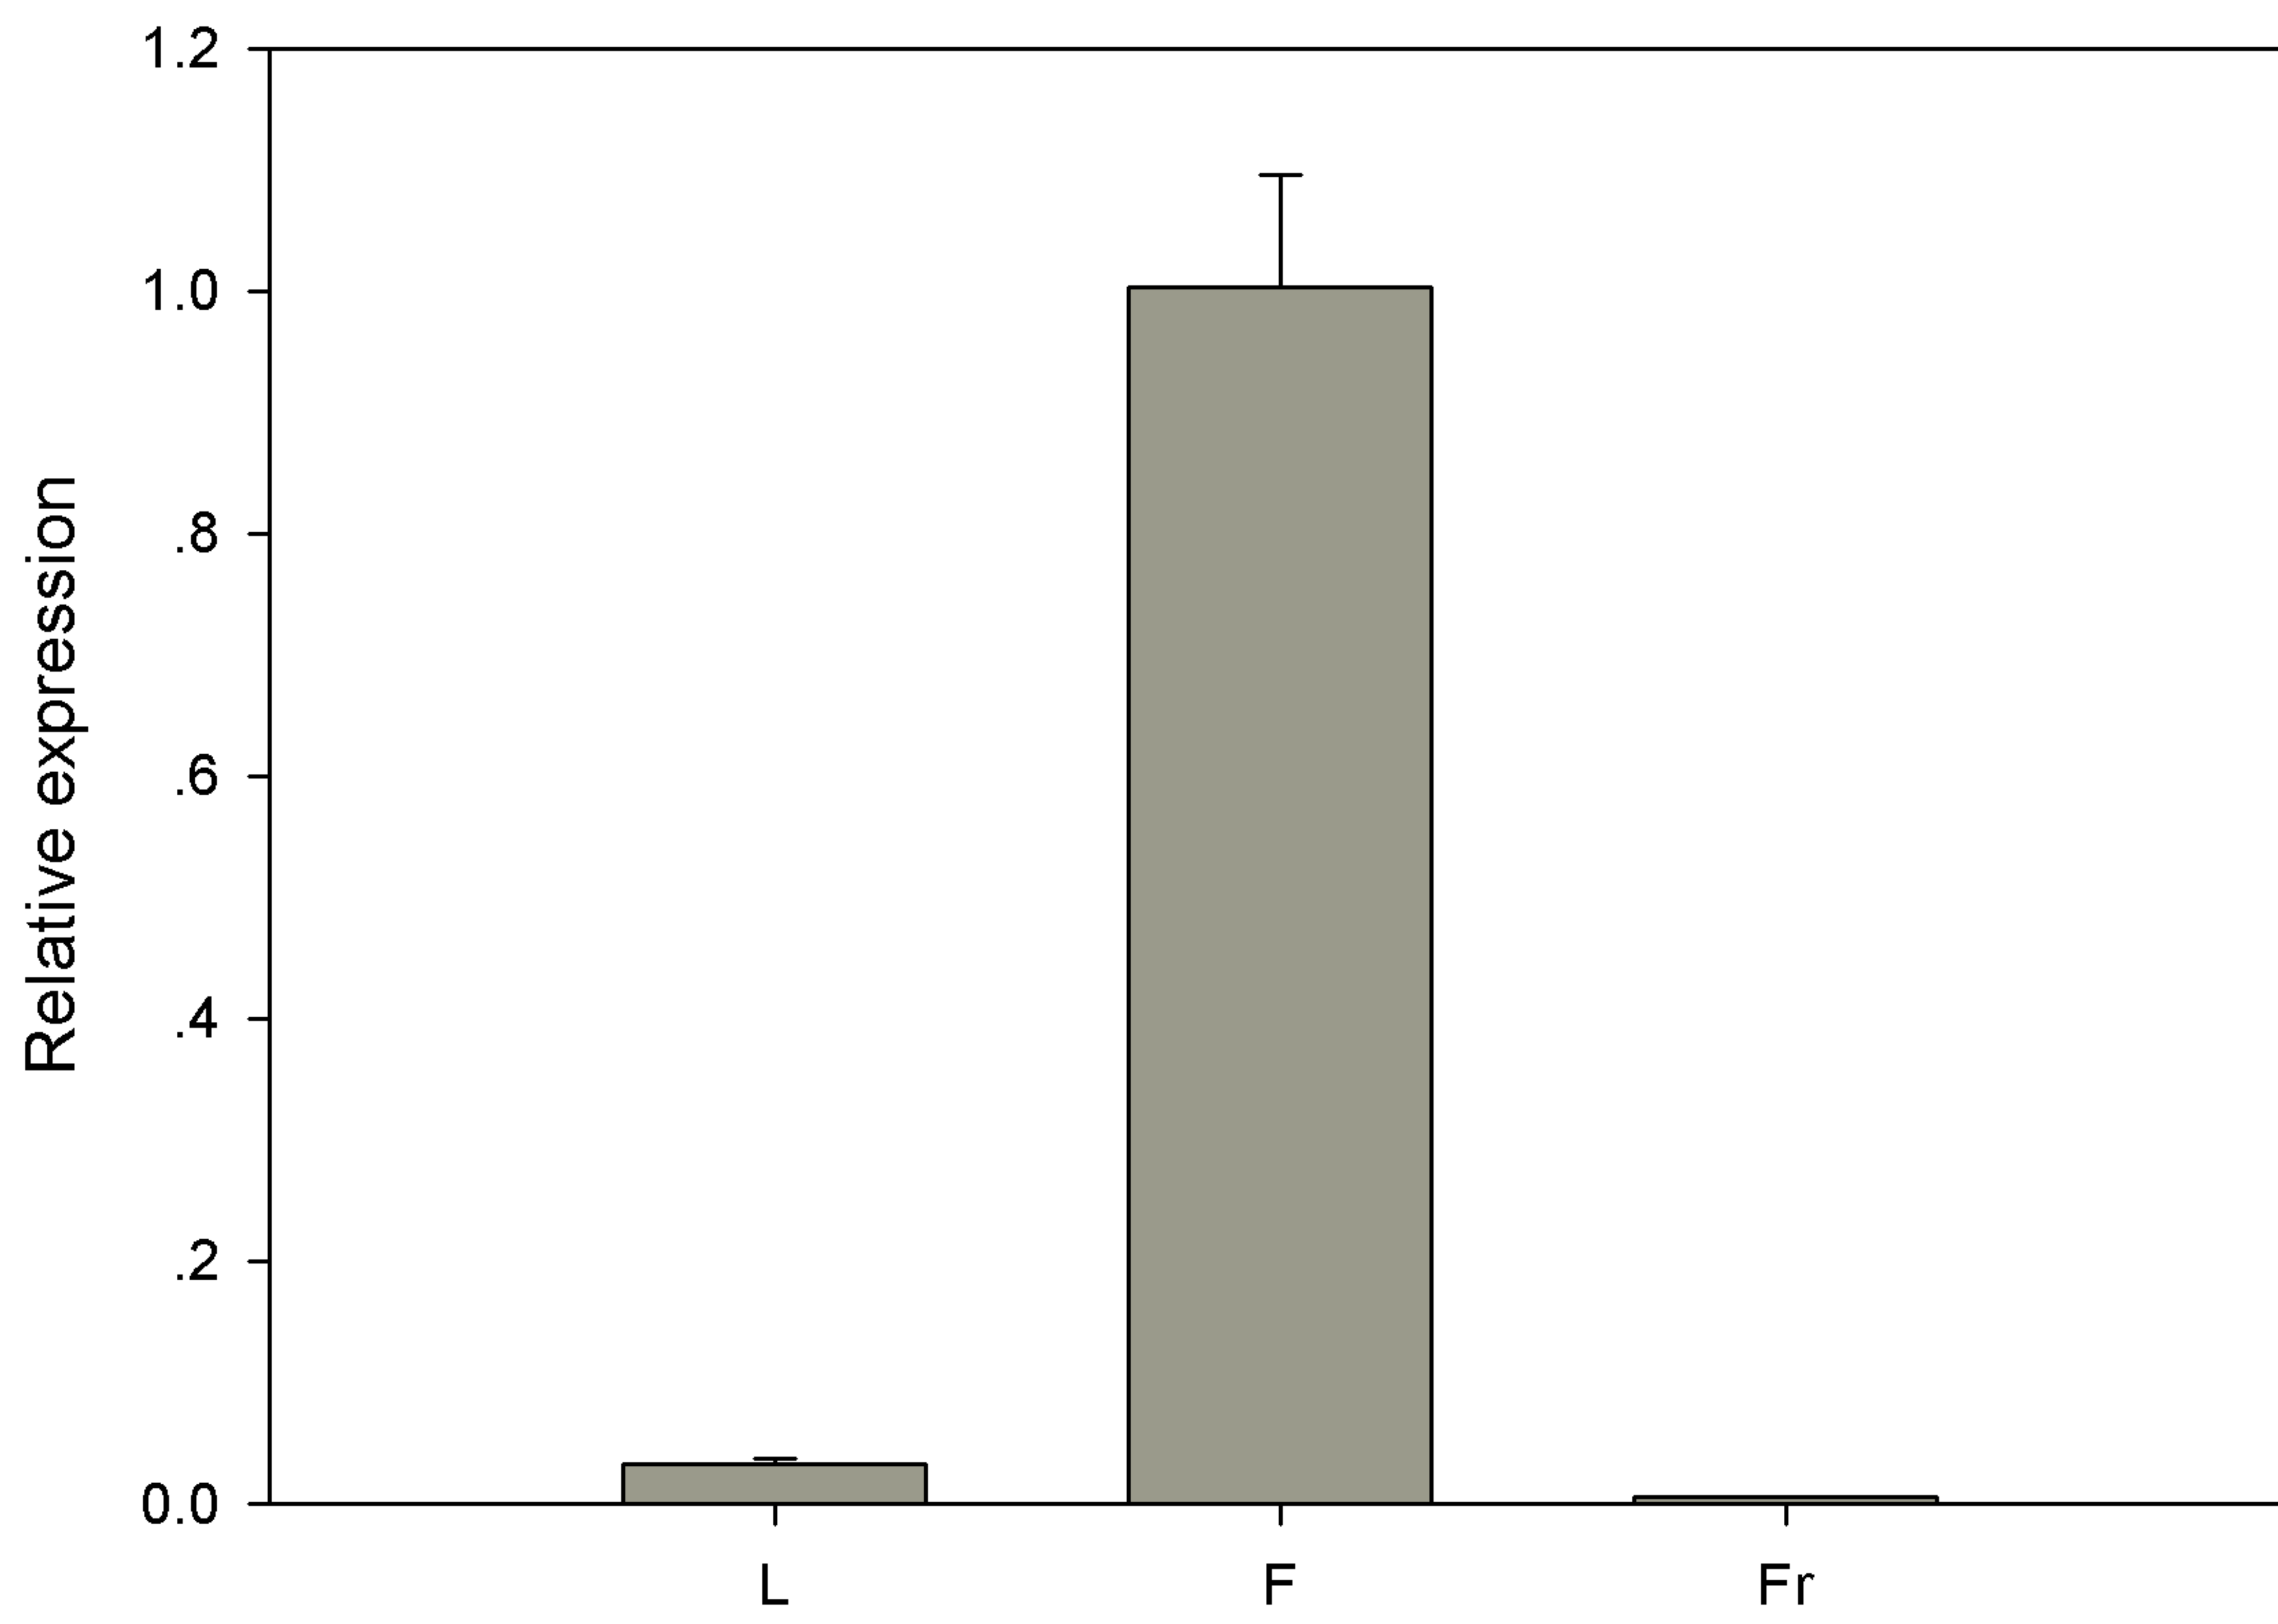

### Csi-miR167d.1

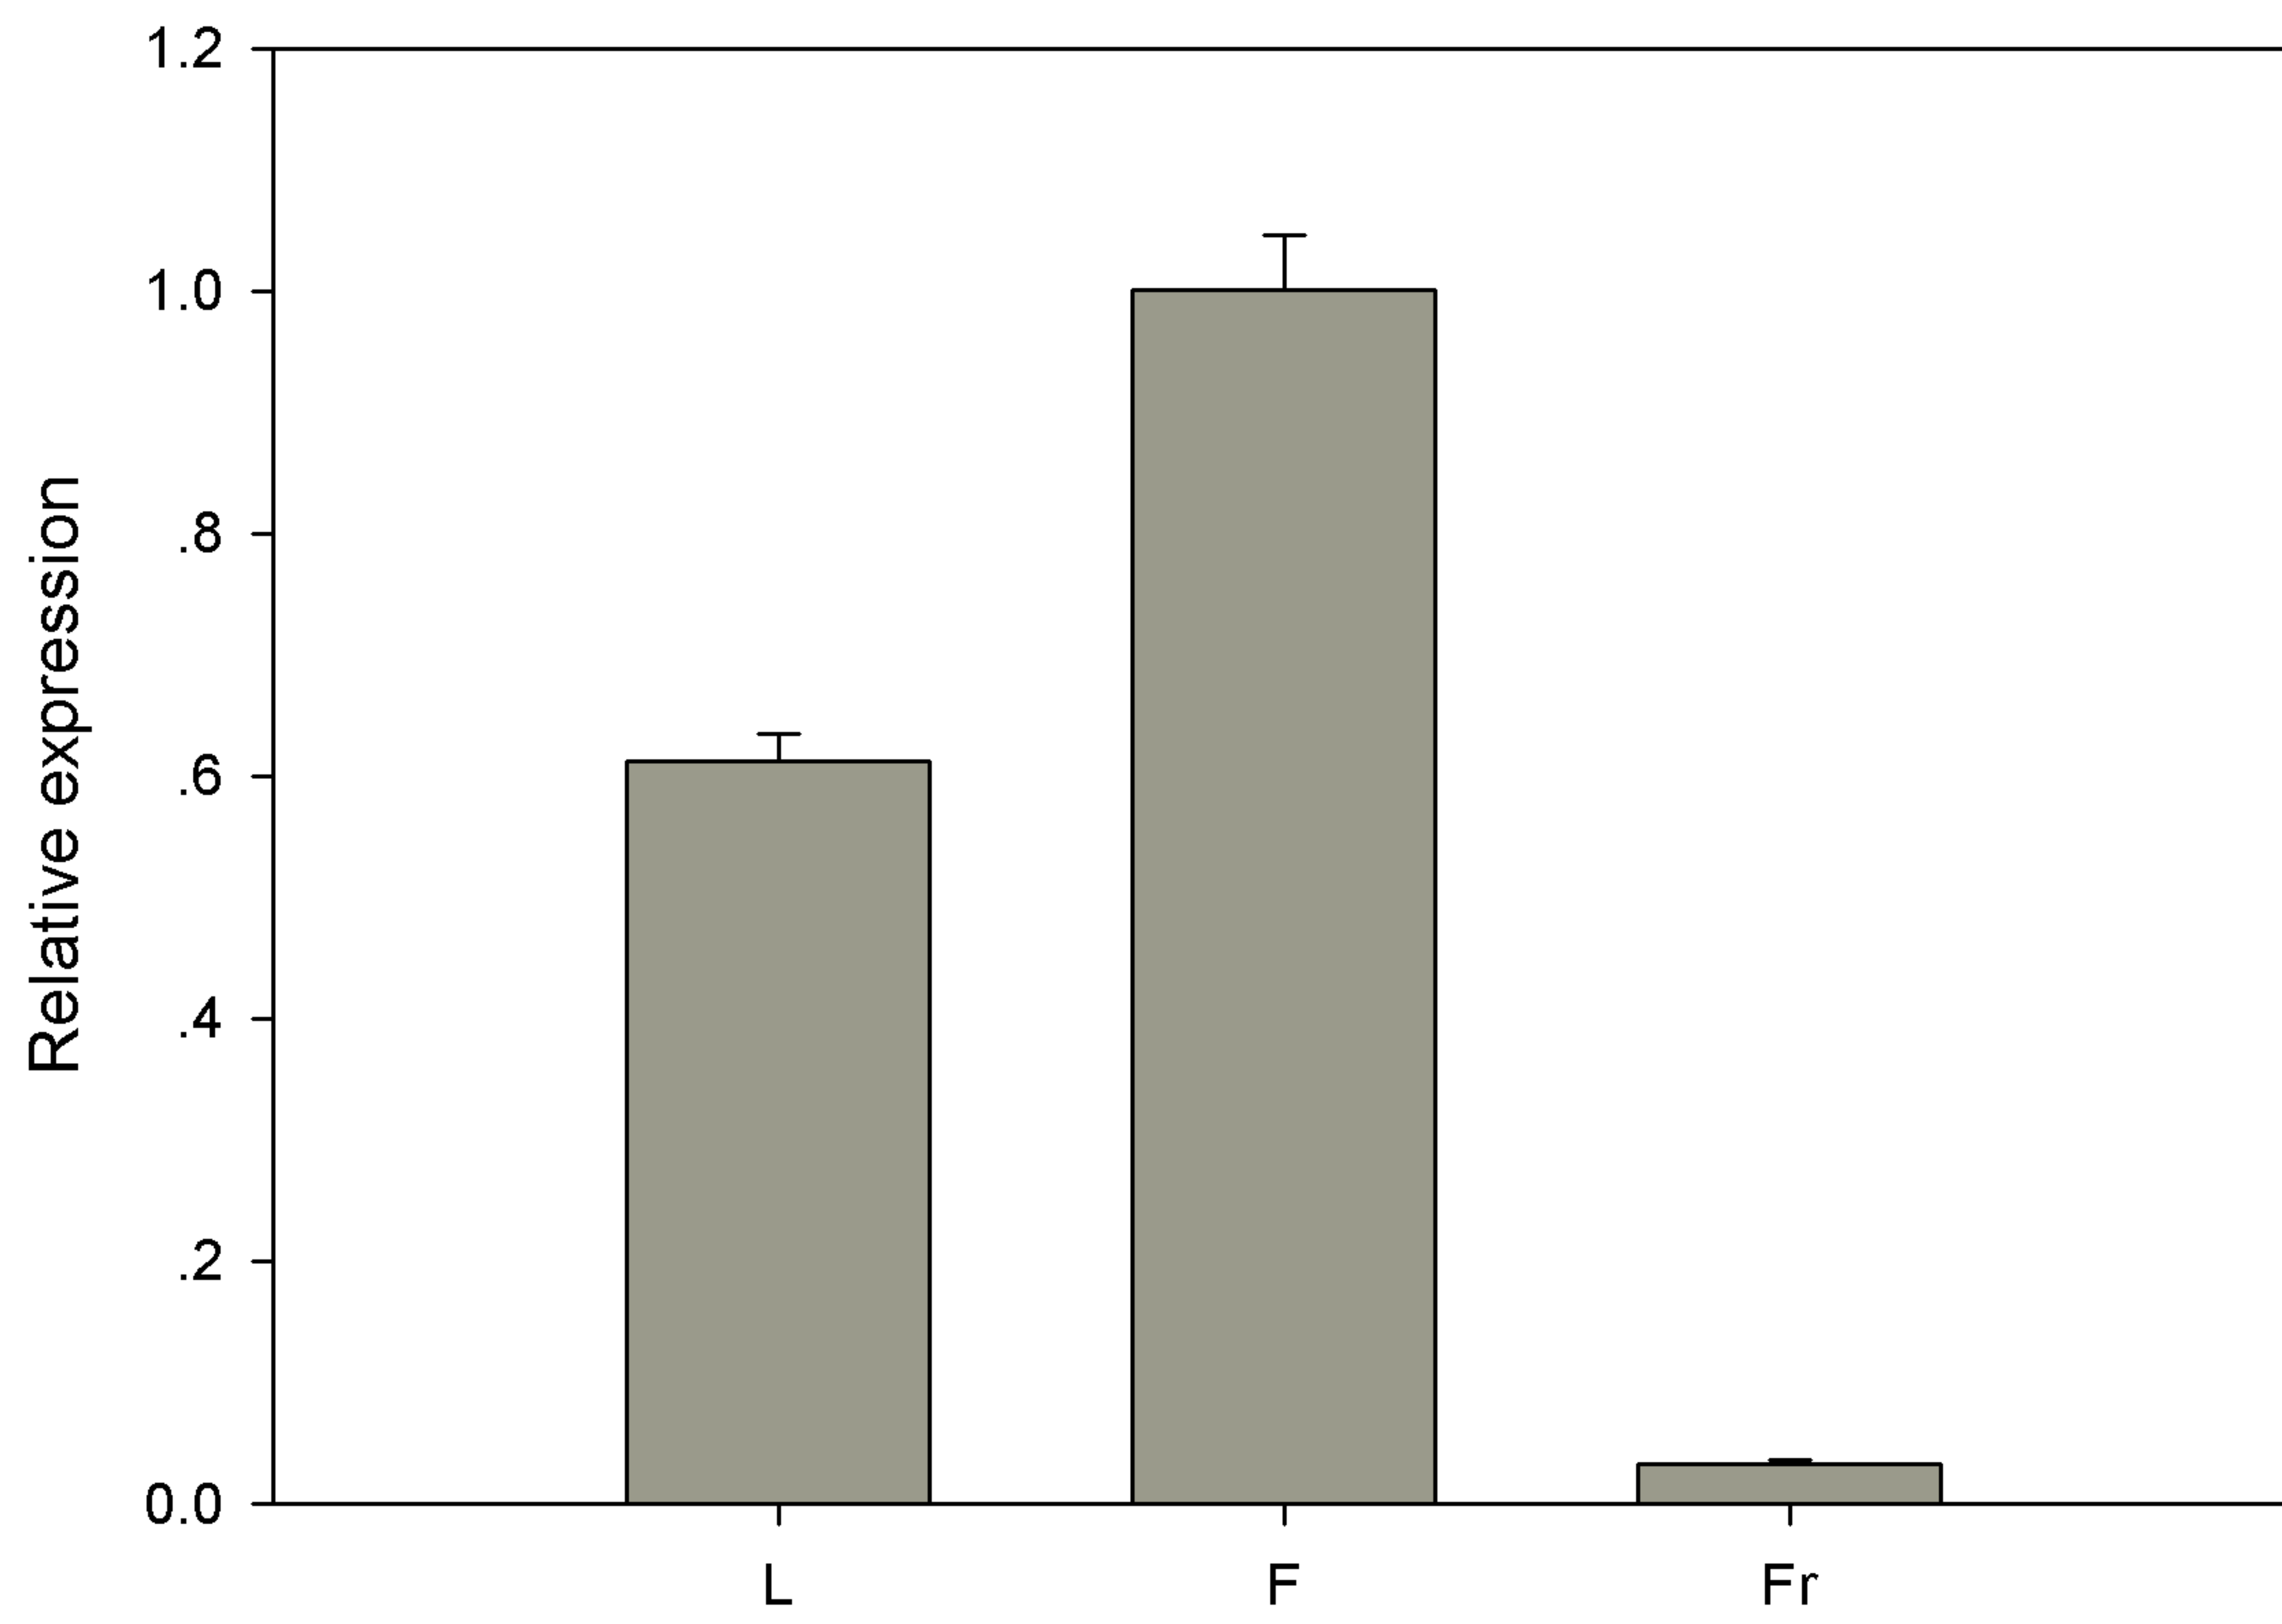

### Csi-miR168a

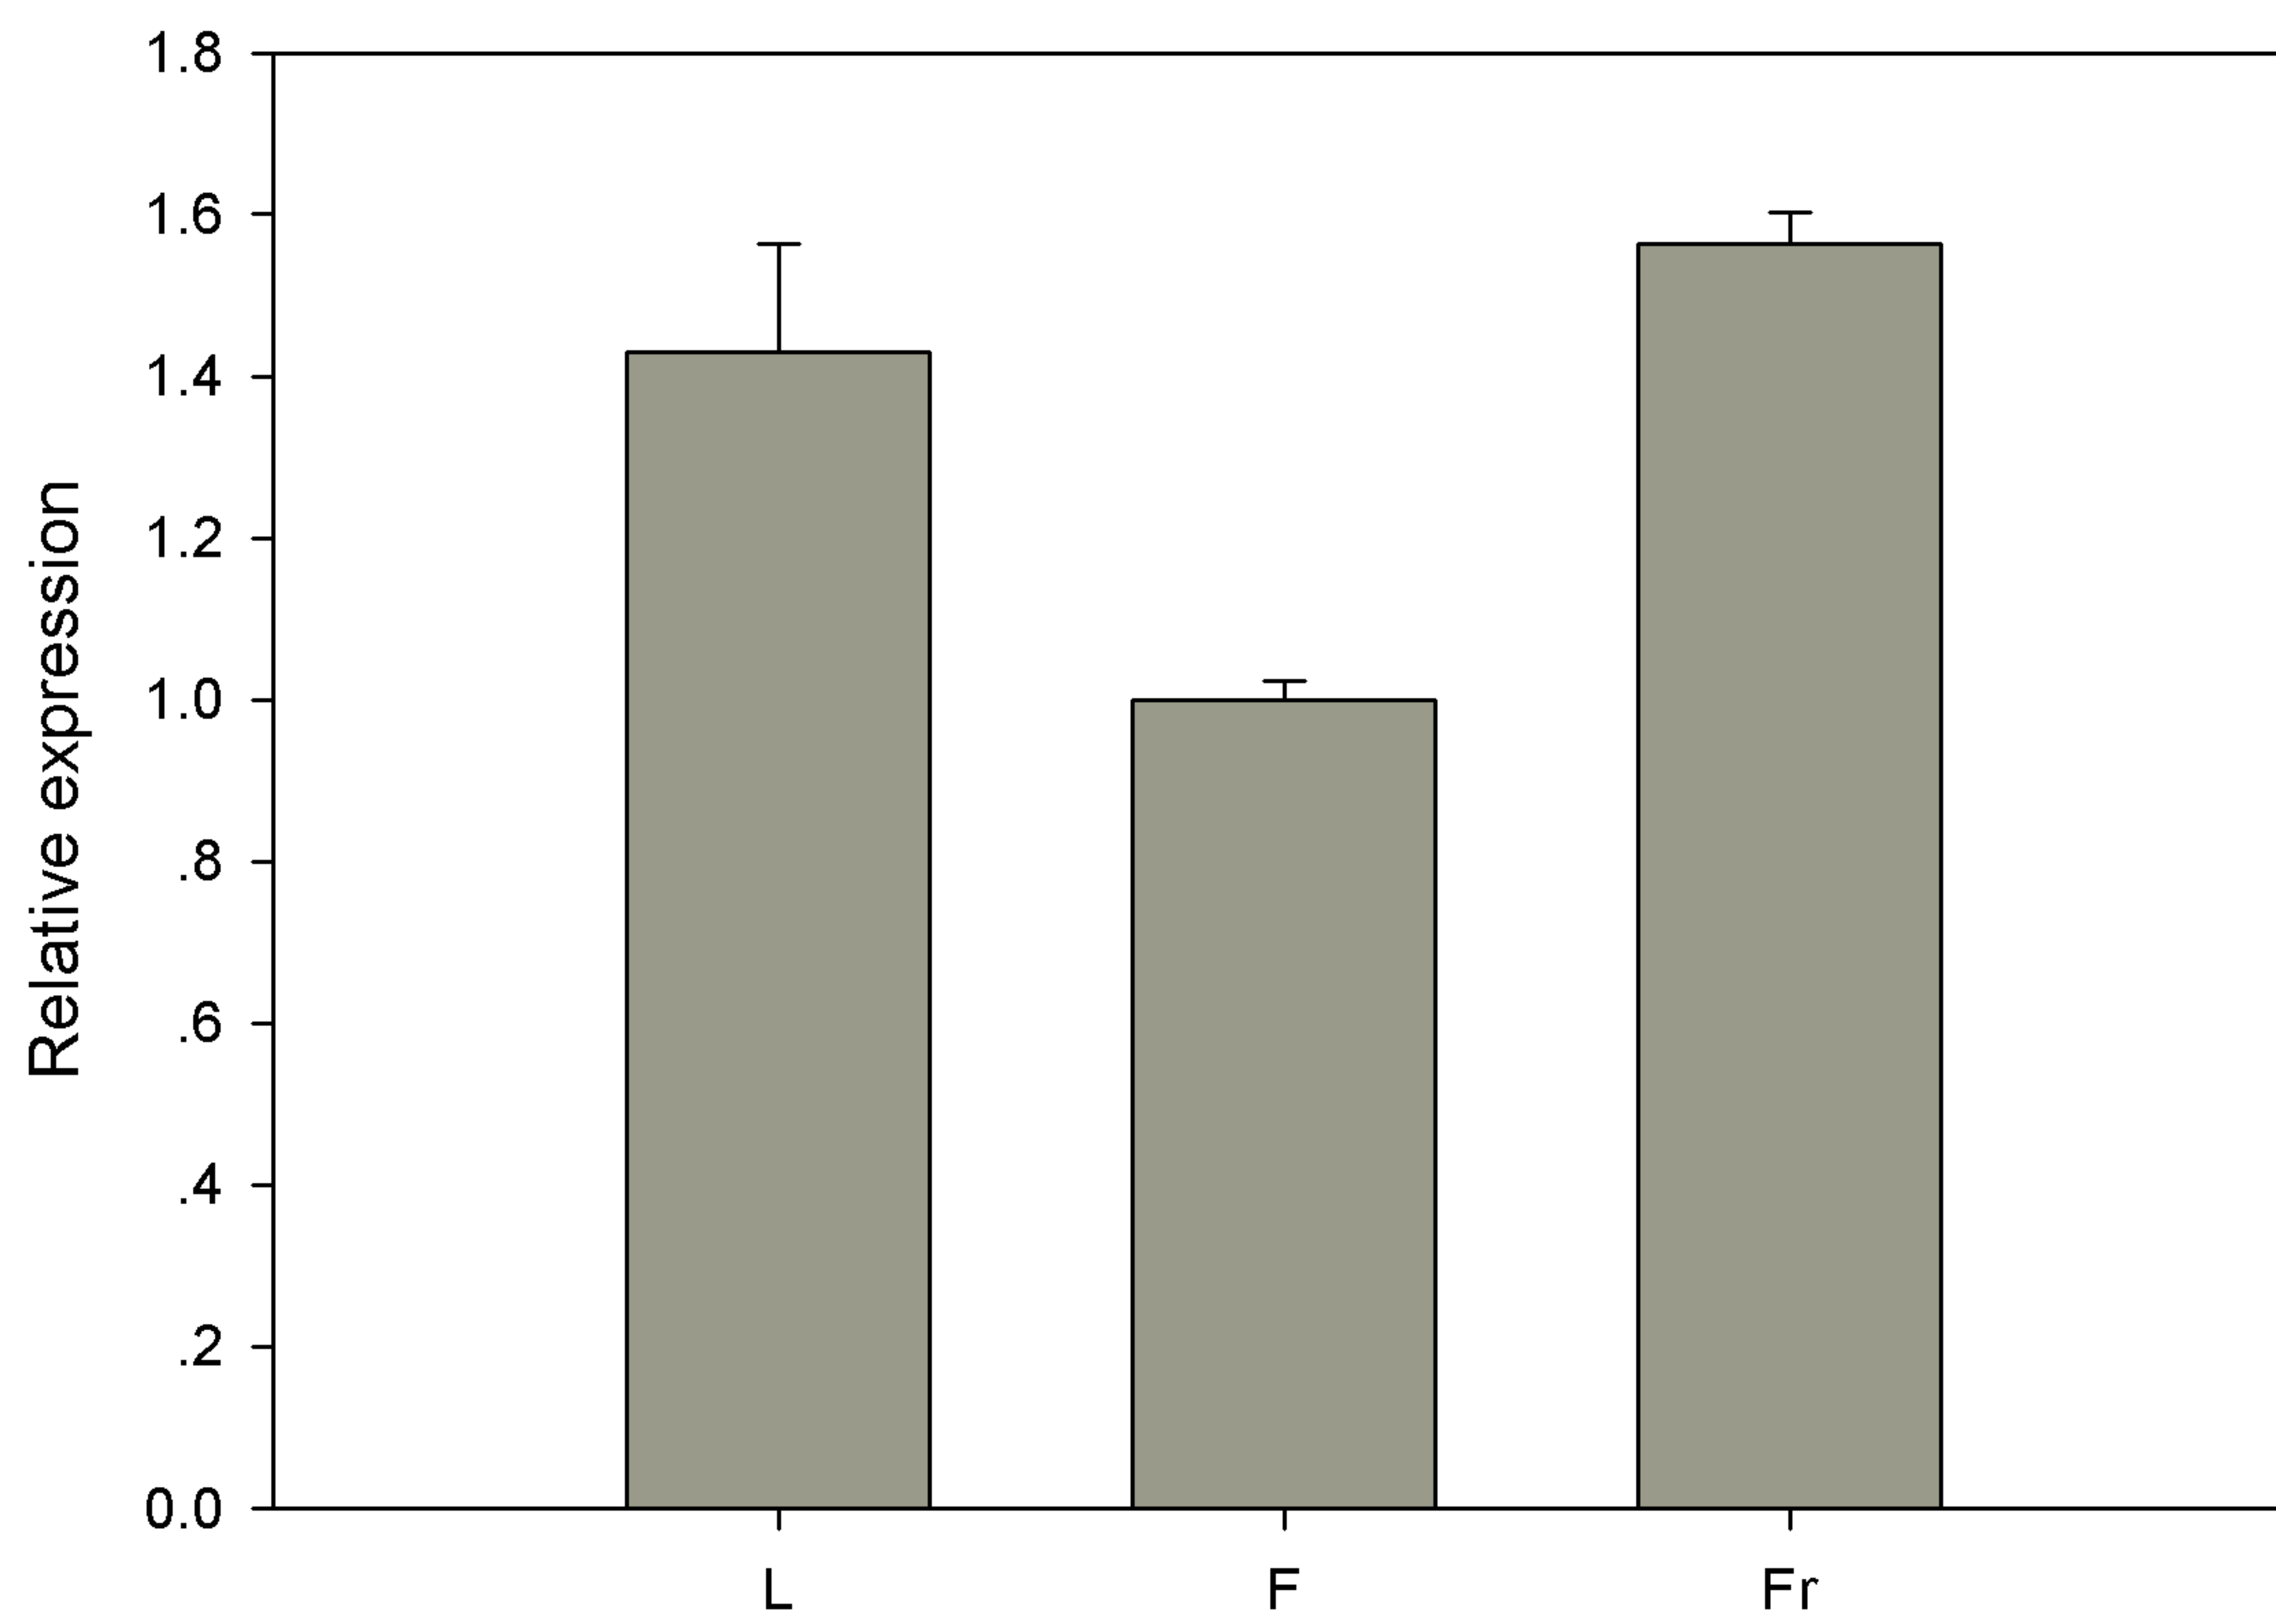

### Csi-miR169m.1

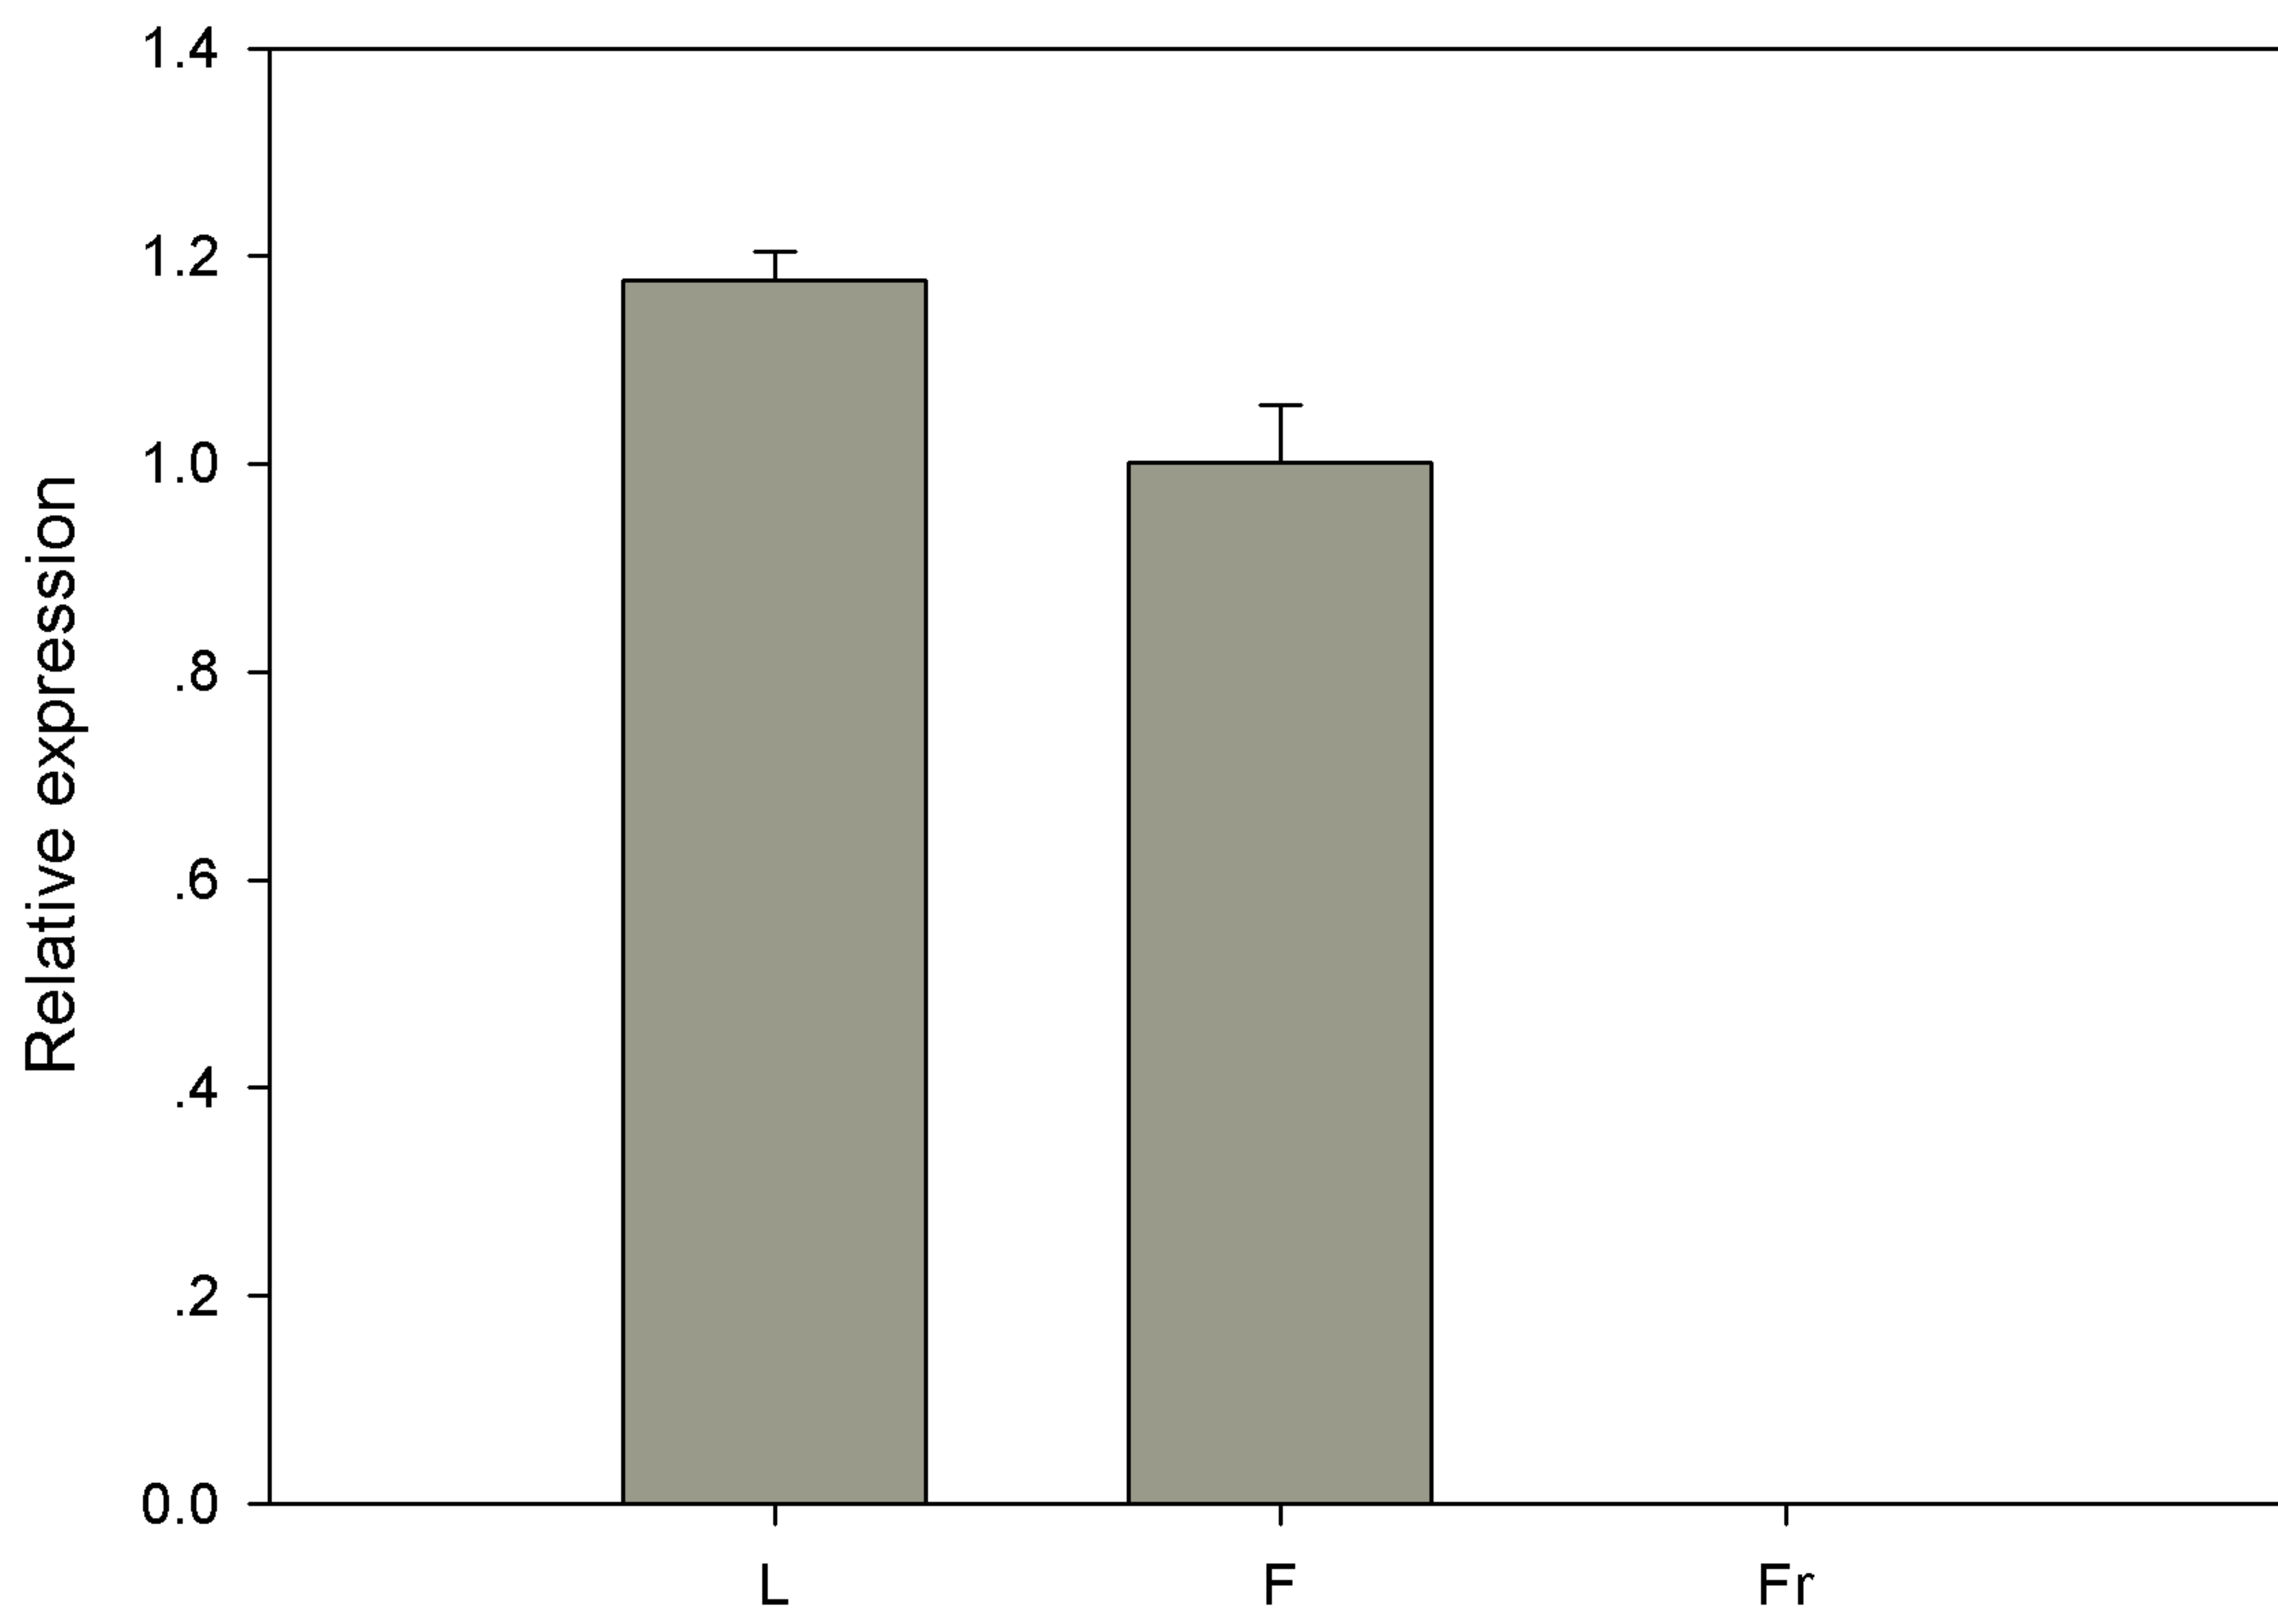

### Csi-miR171a.1

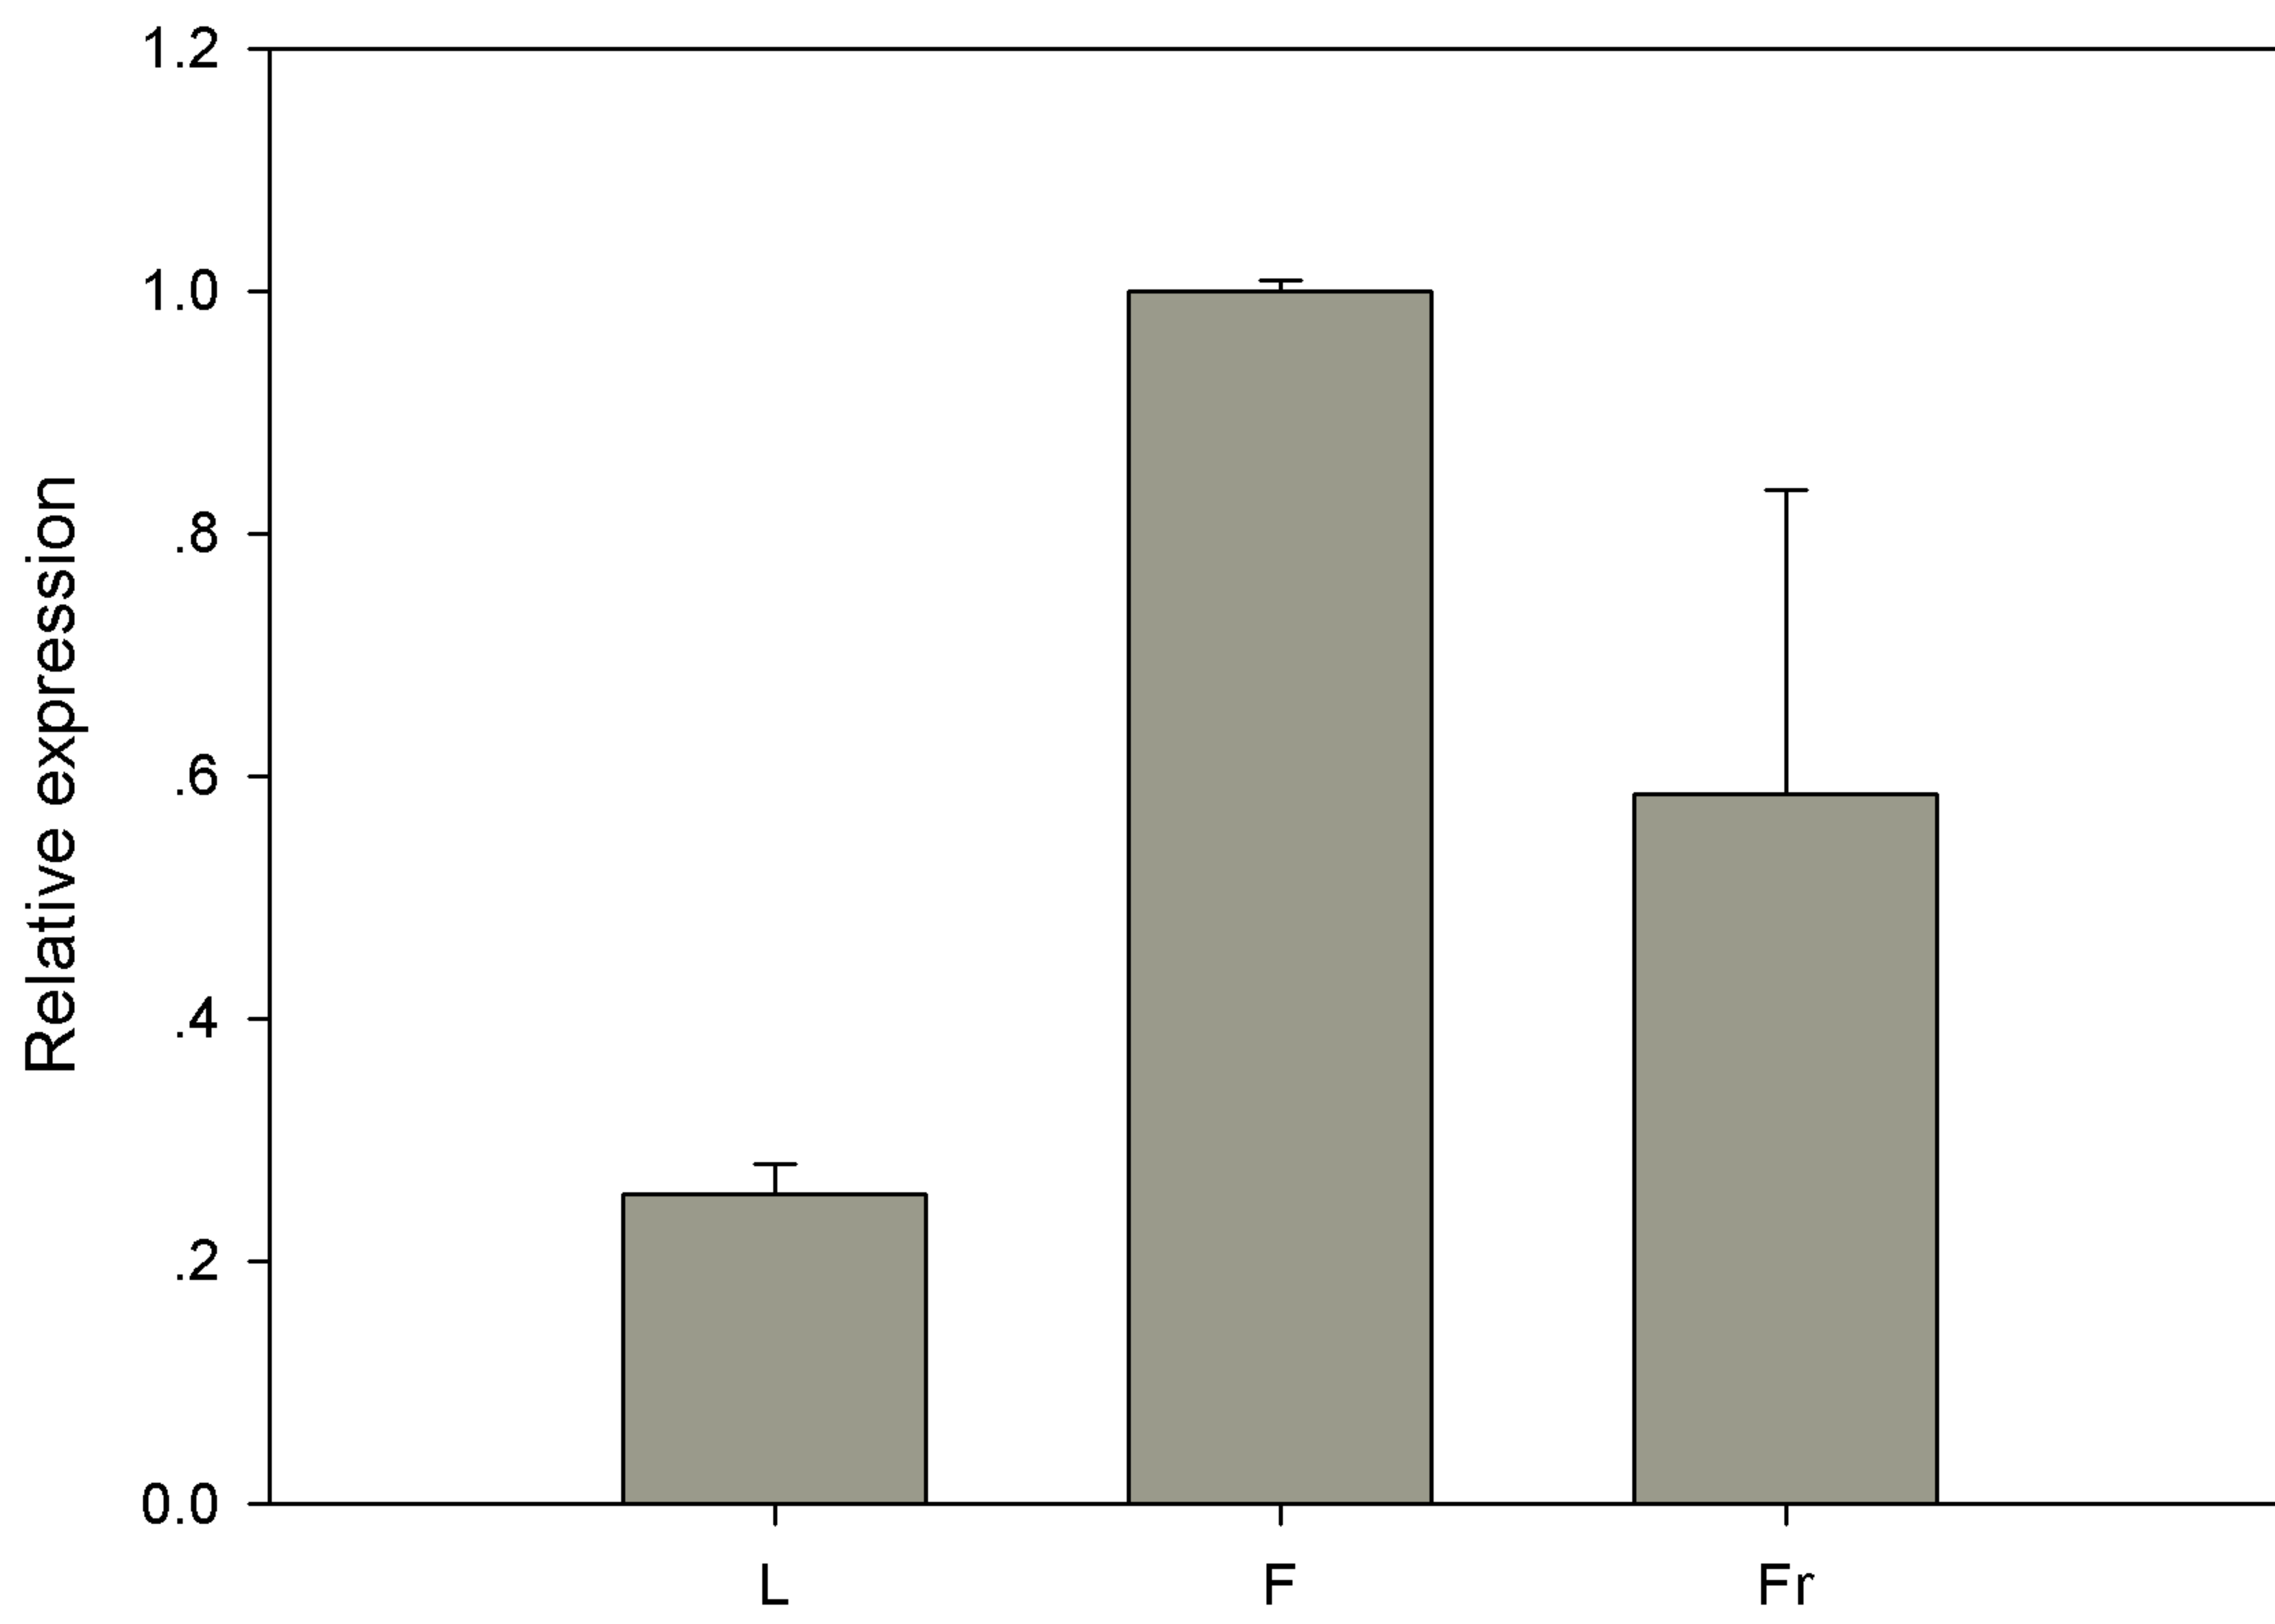

### Csi-miR171b

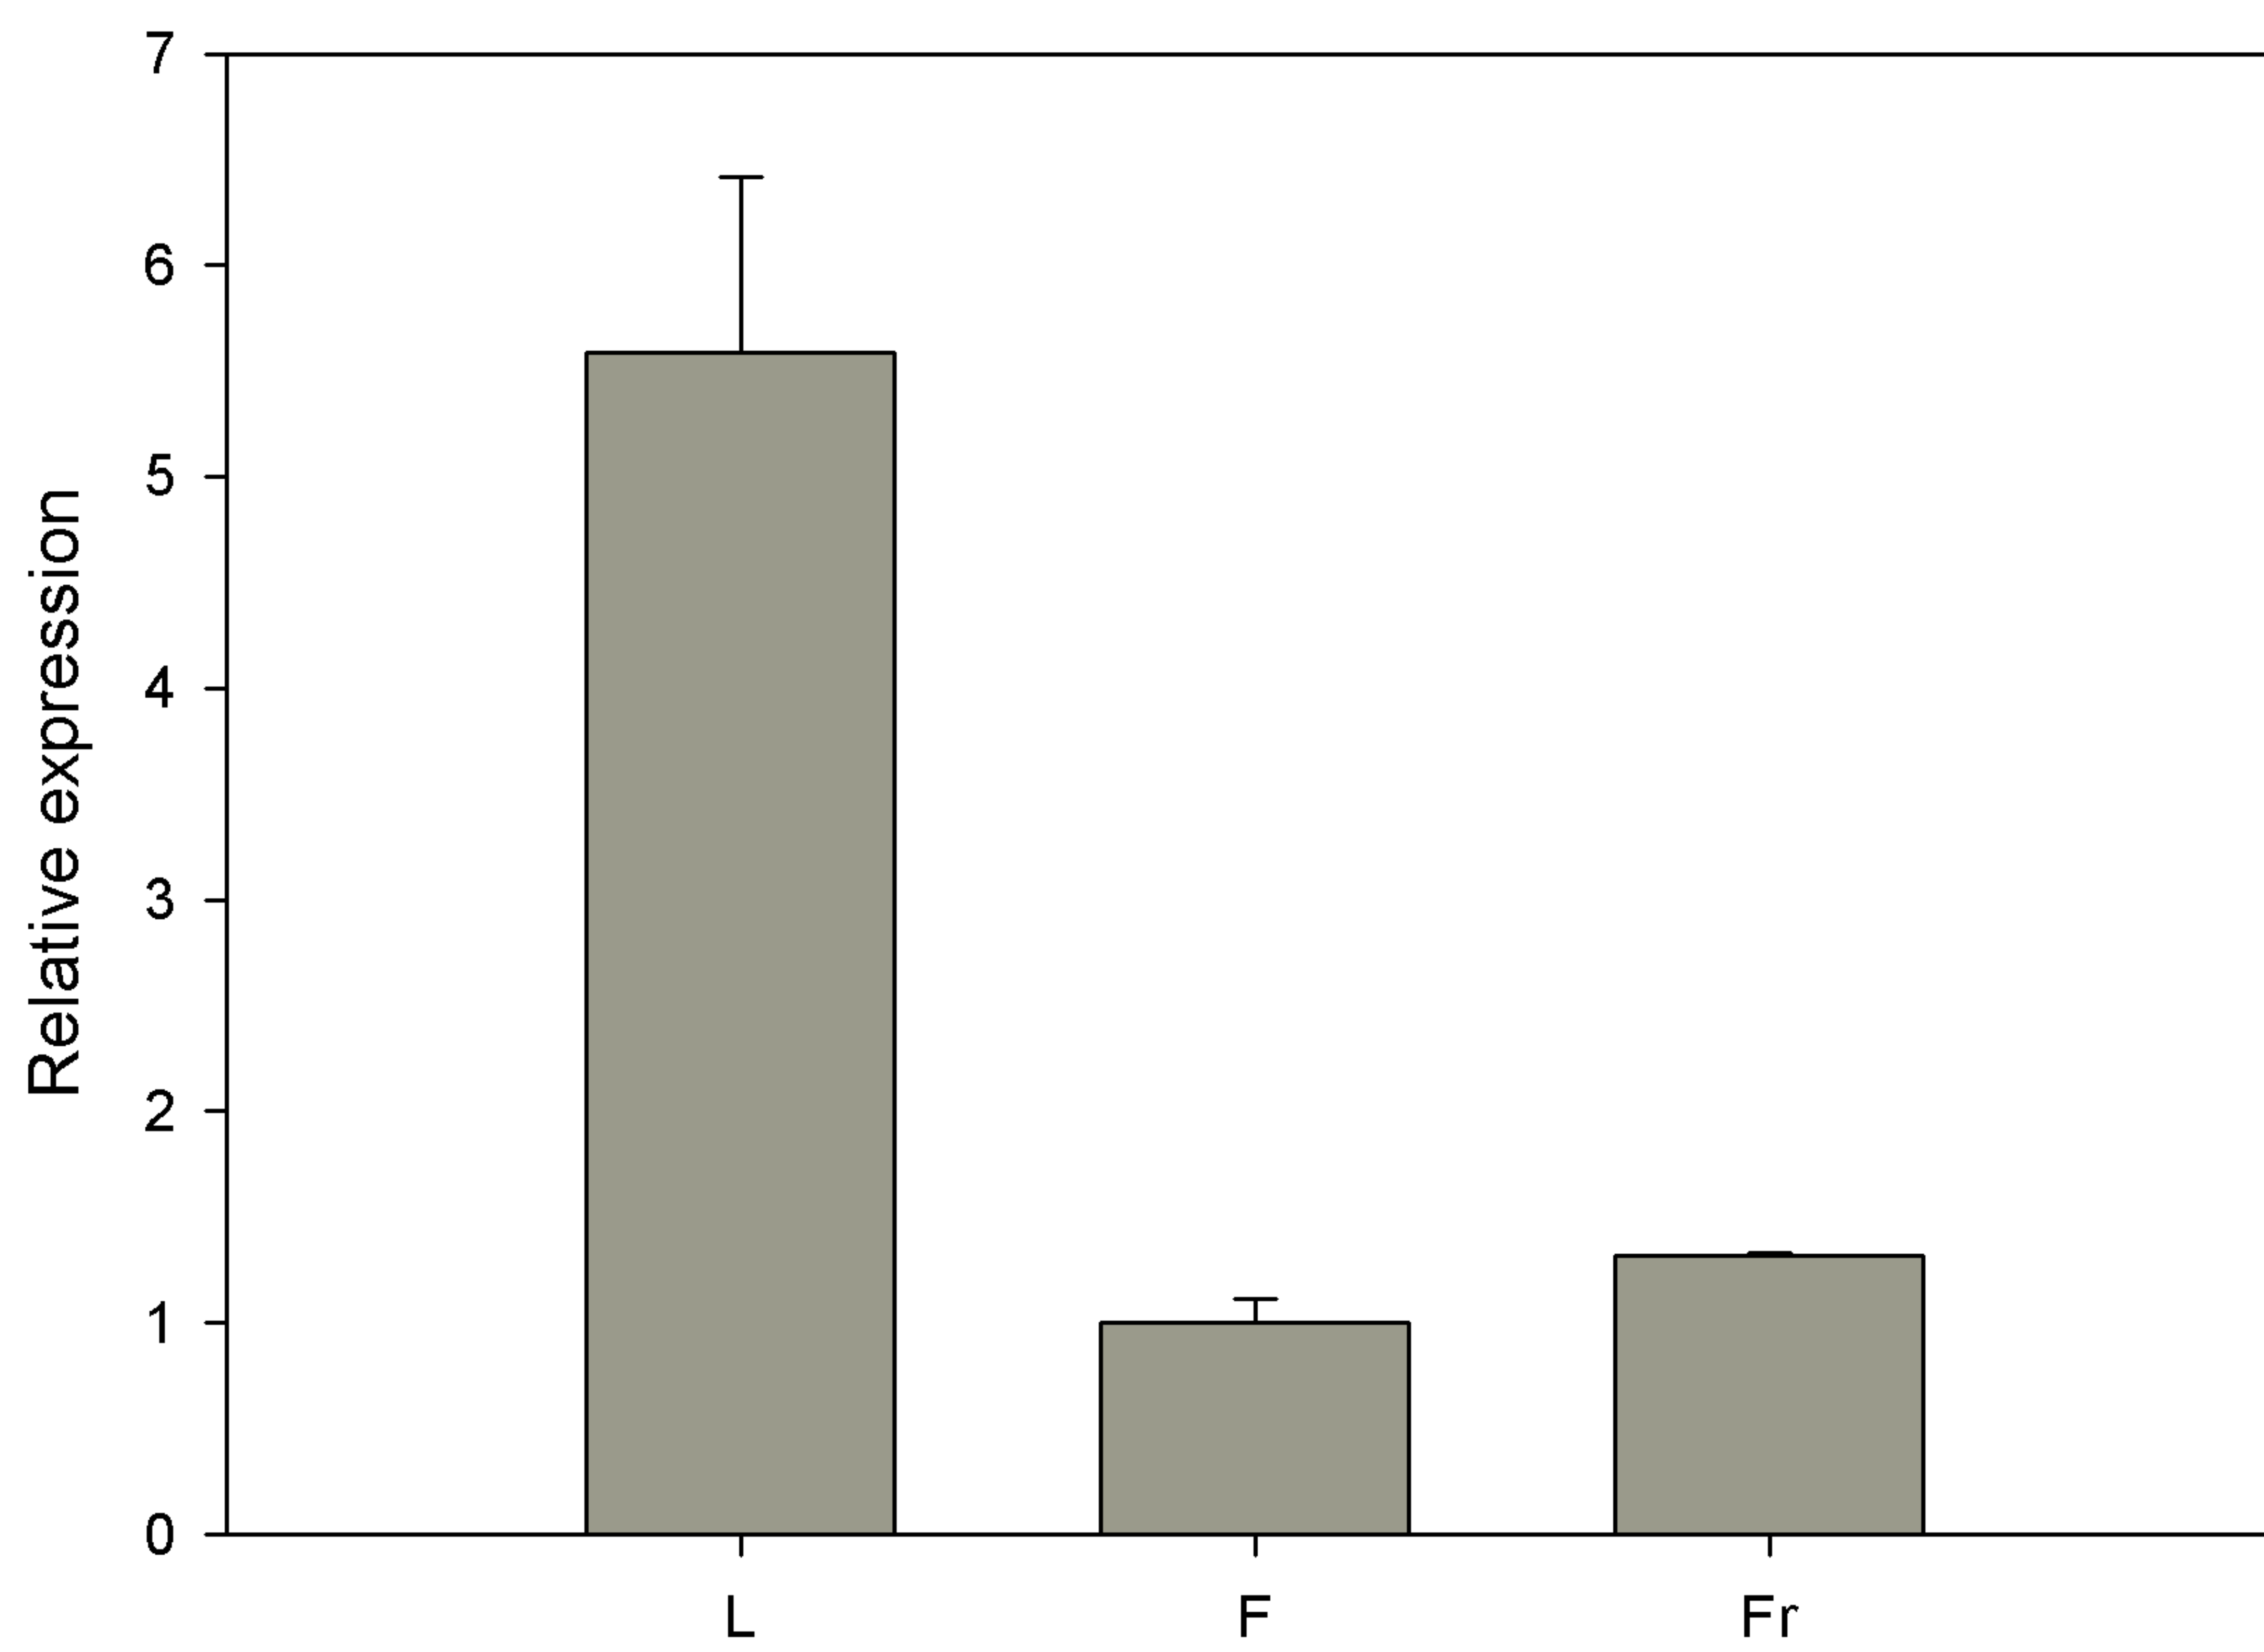

### Csi-miR171g.1

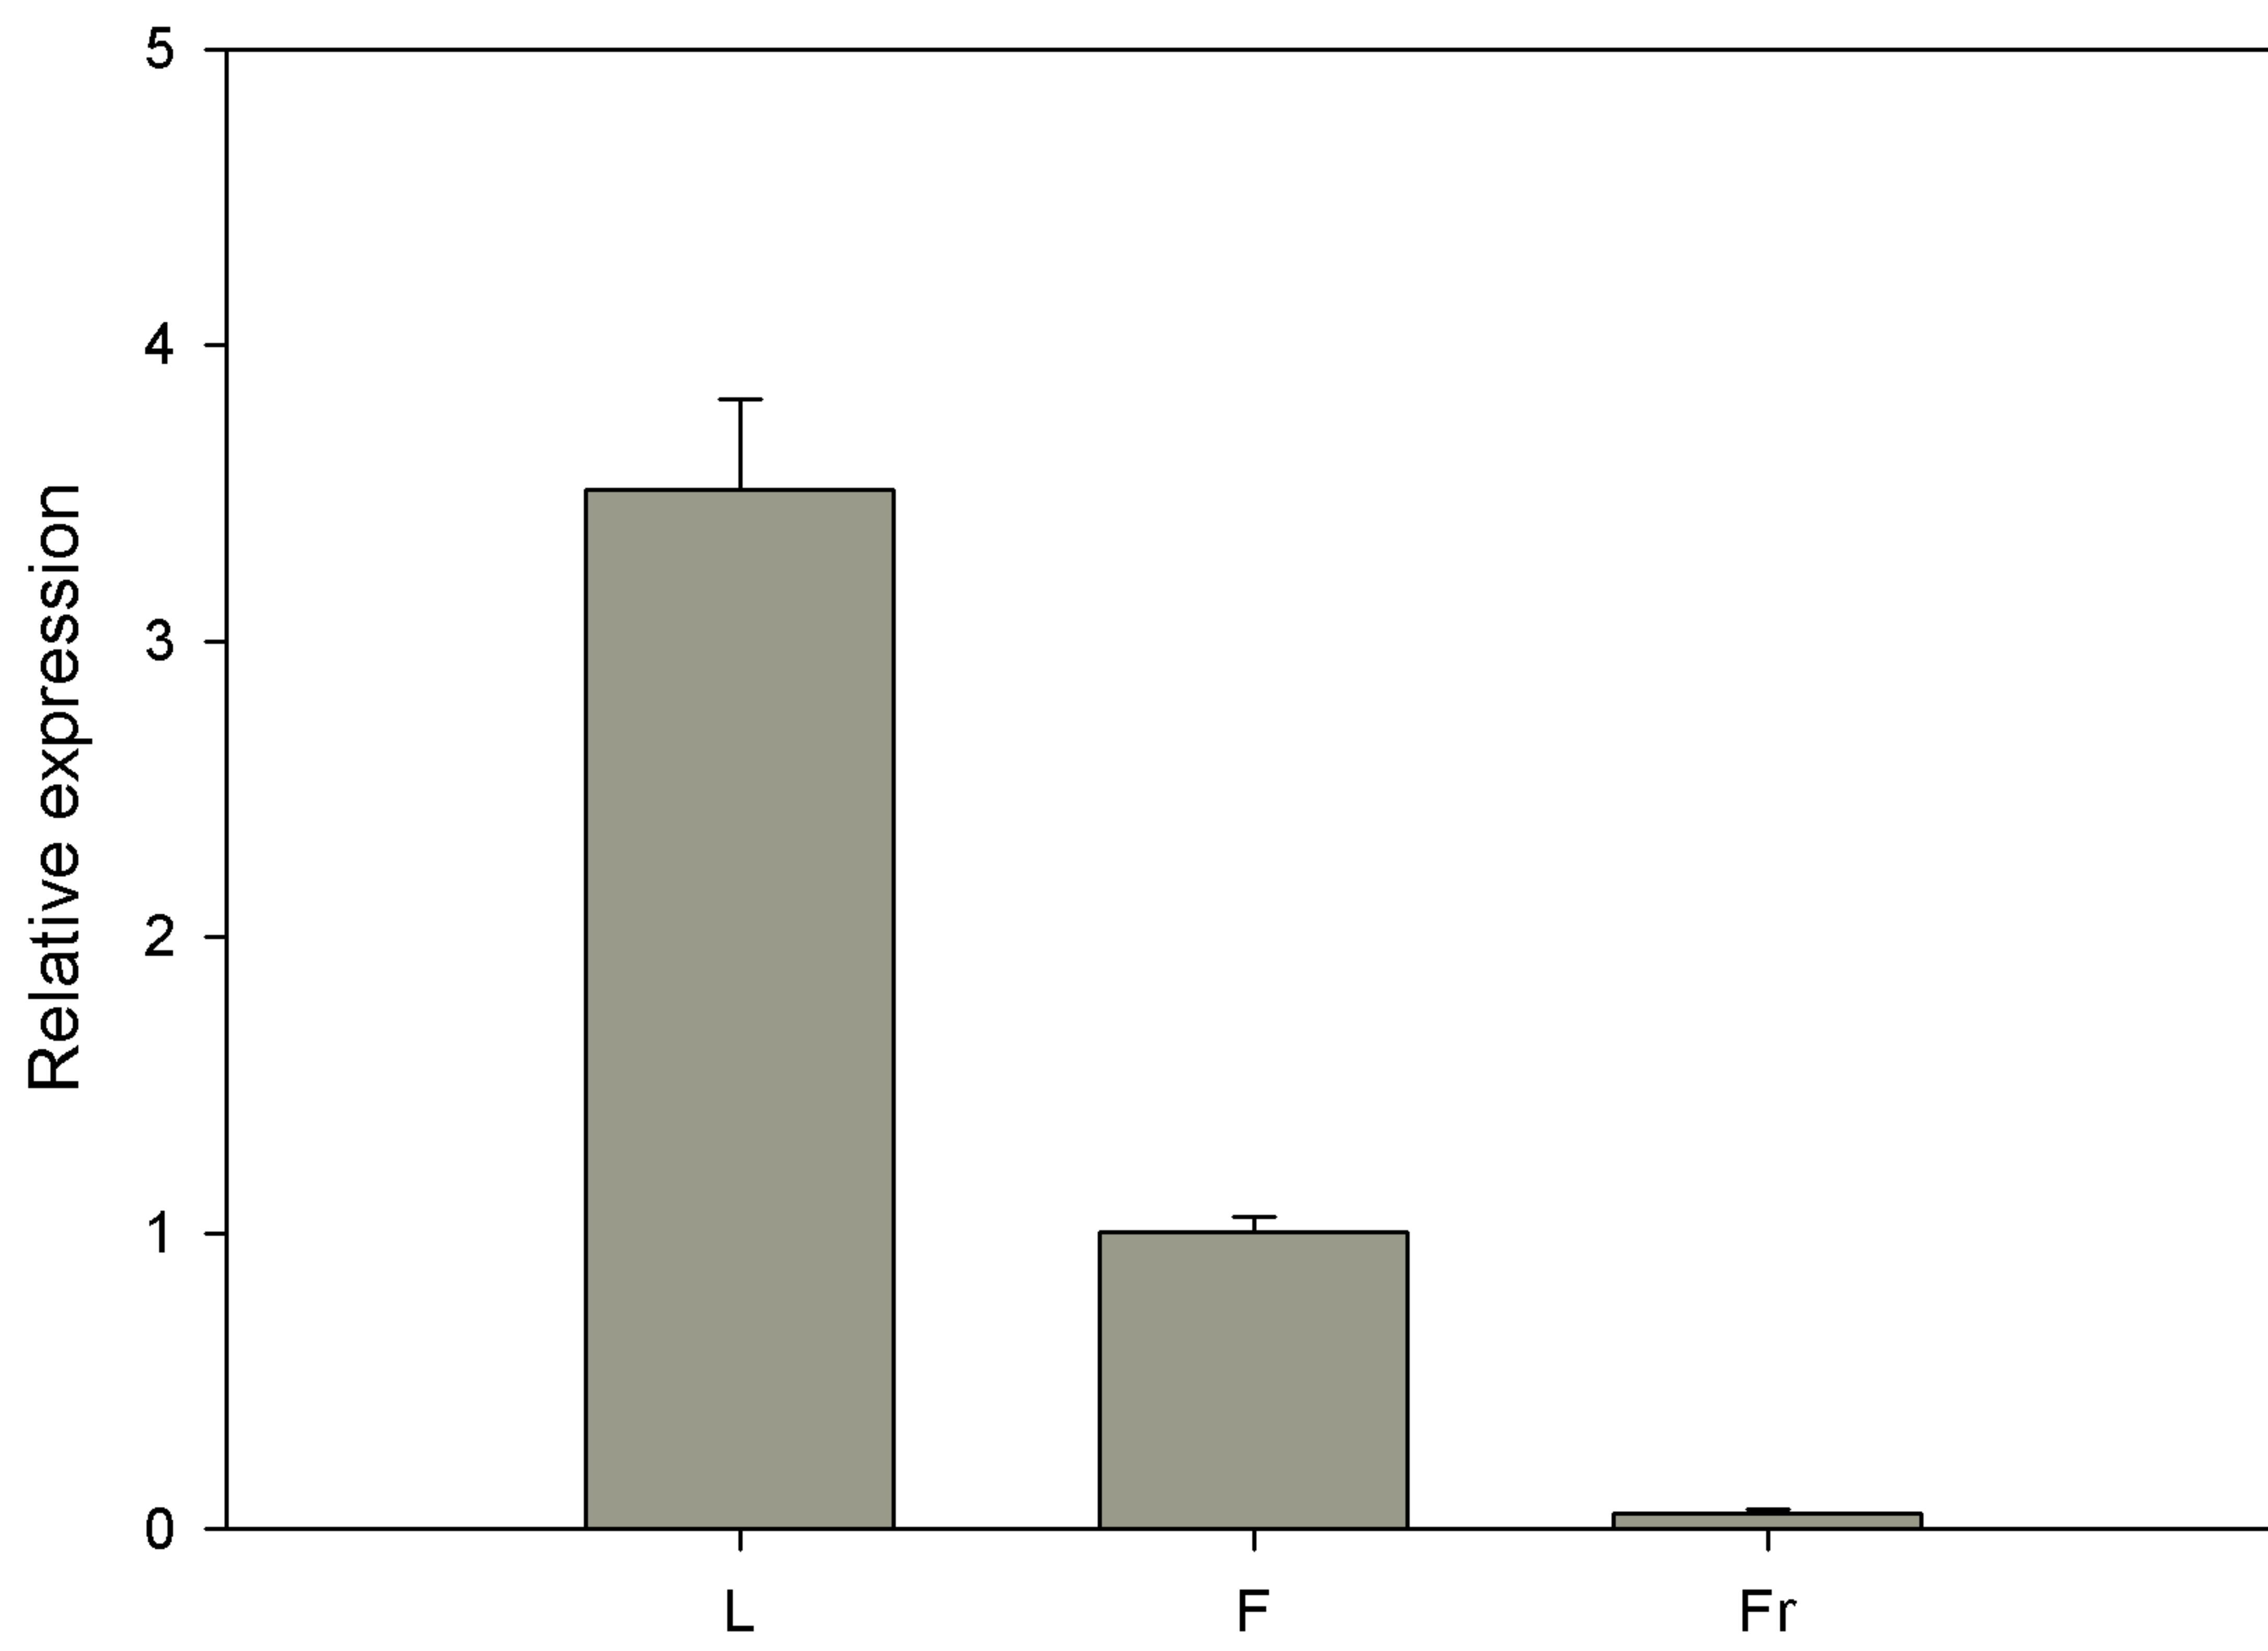

### Csi-miR172a-3p.2

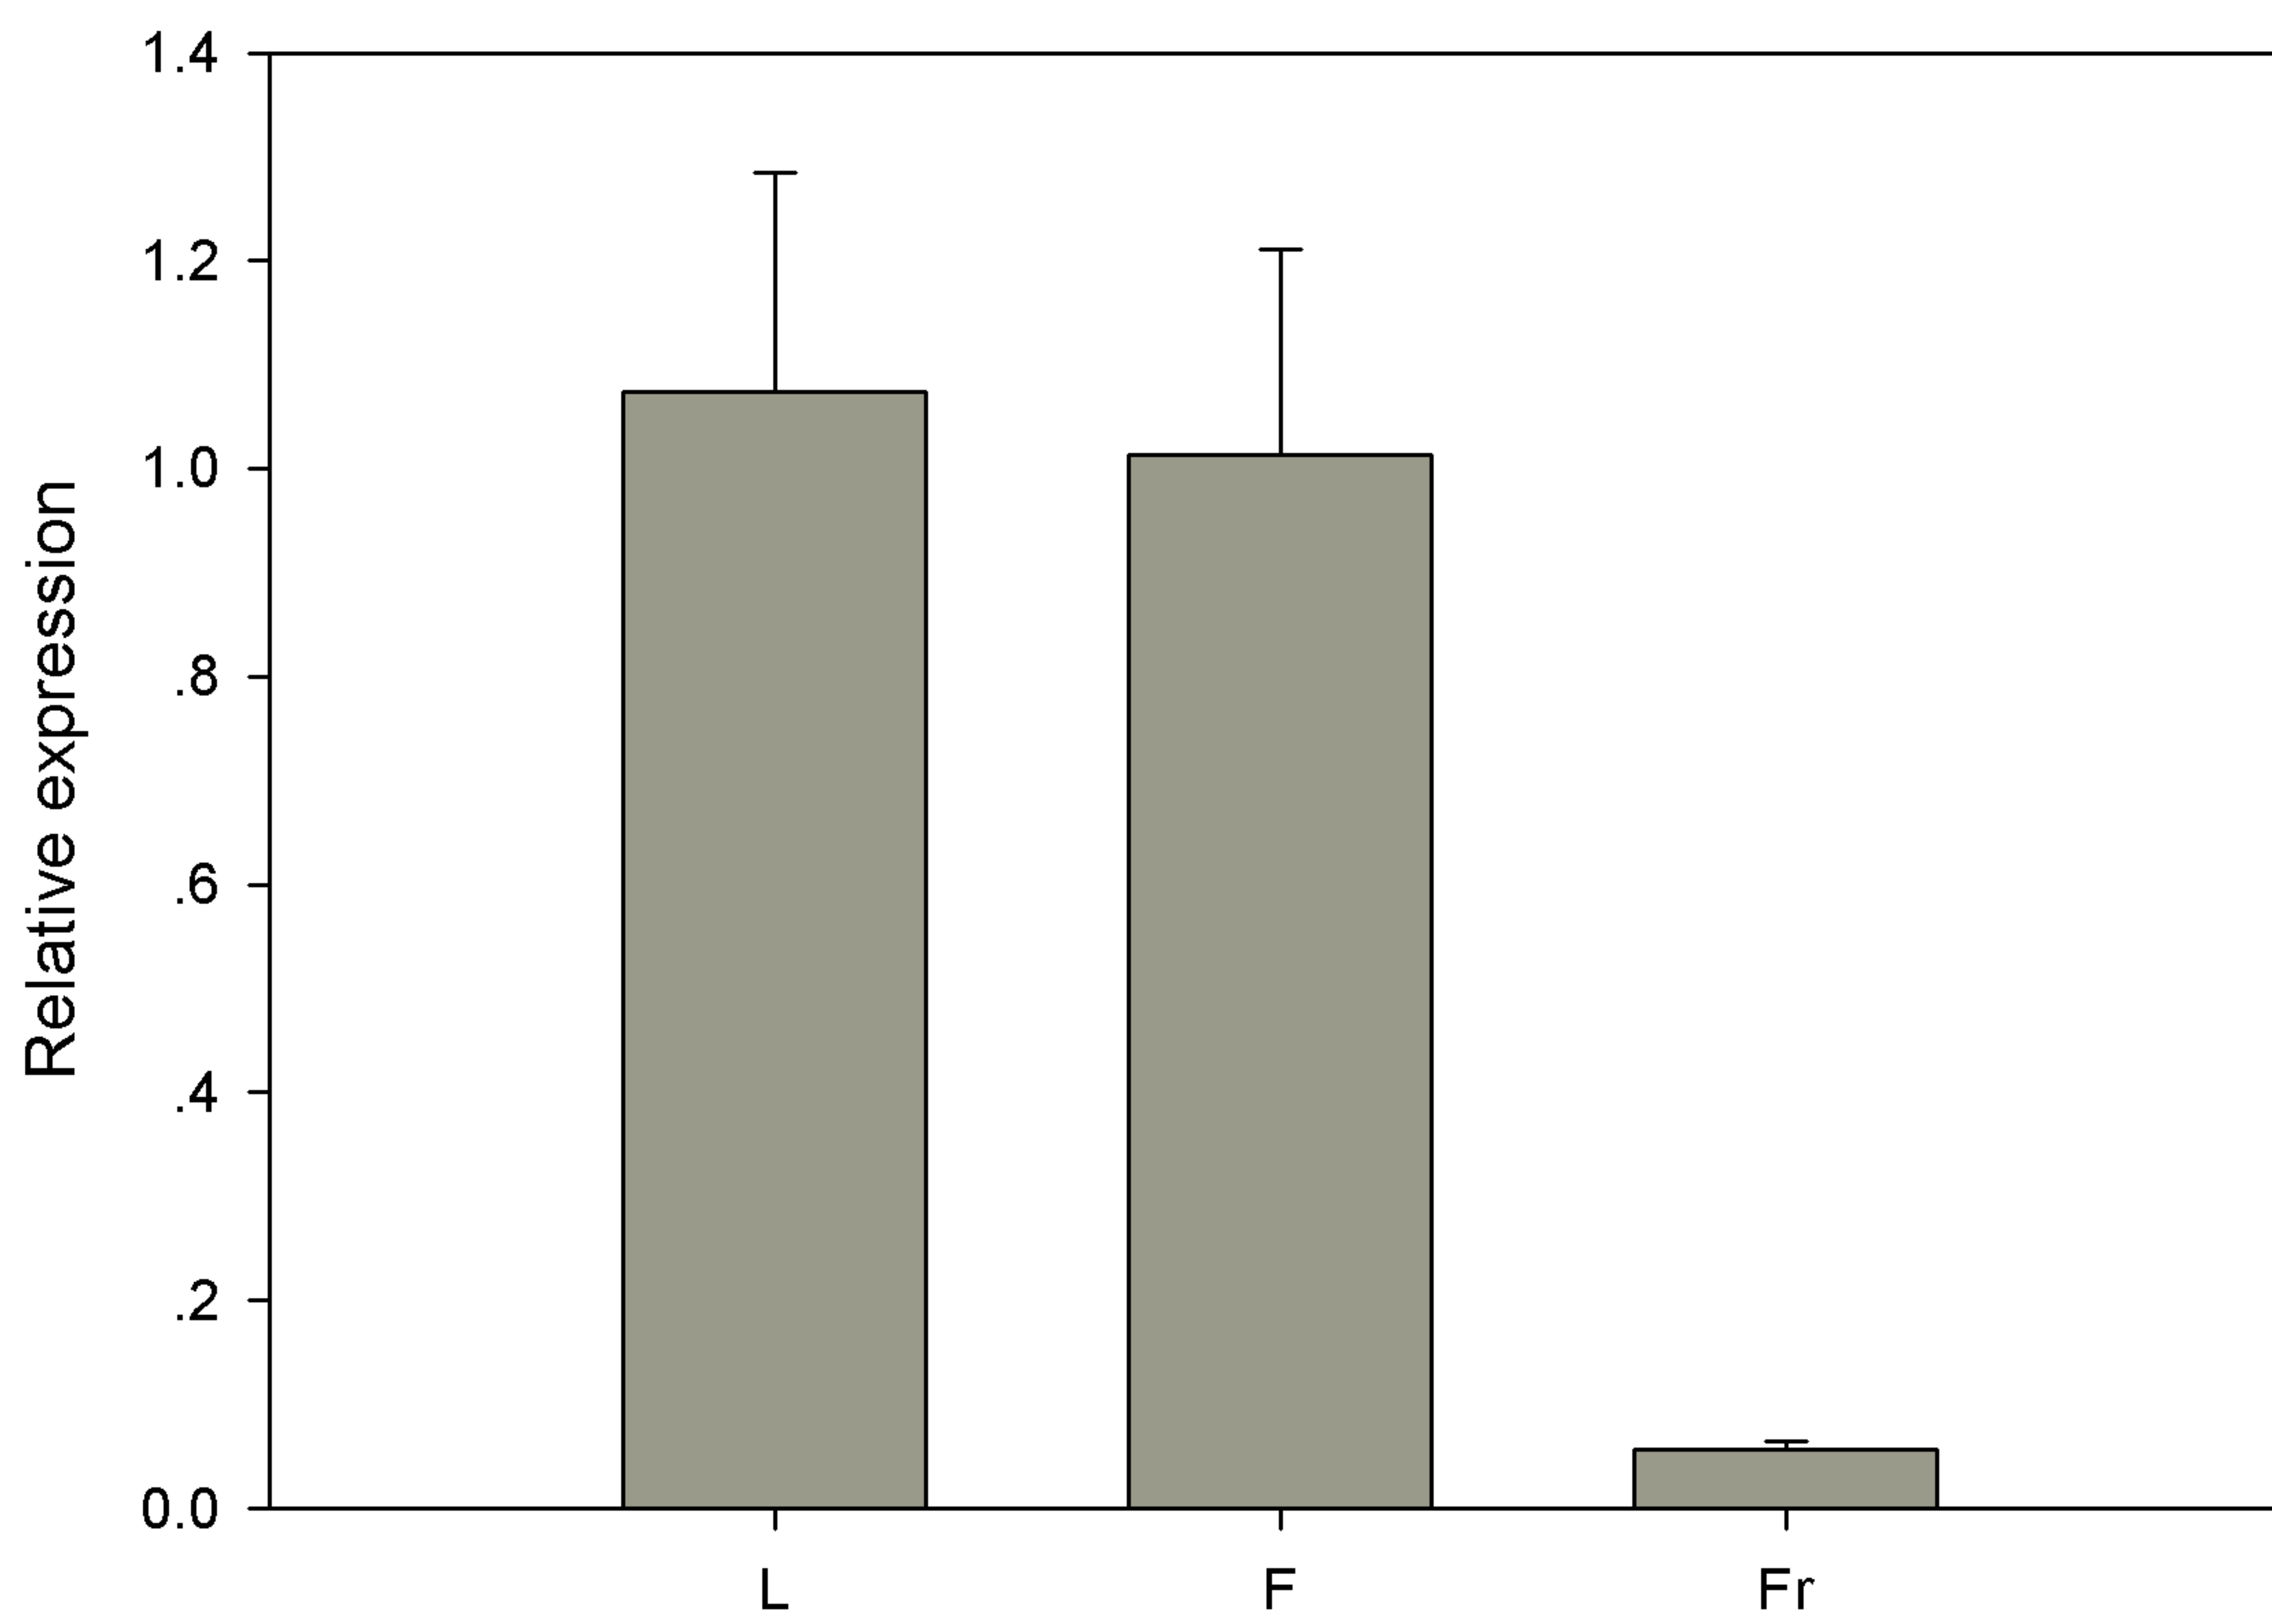



### Csi-miR172c.2

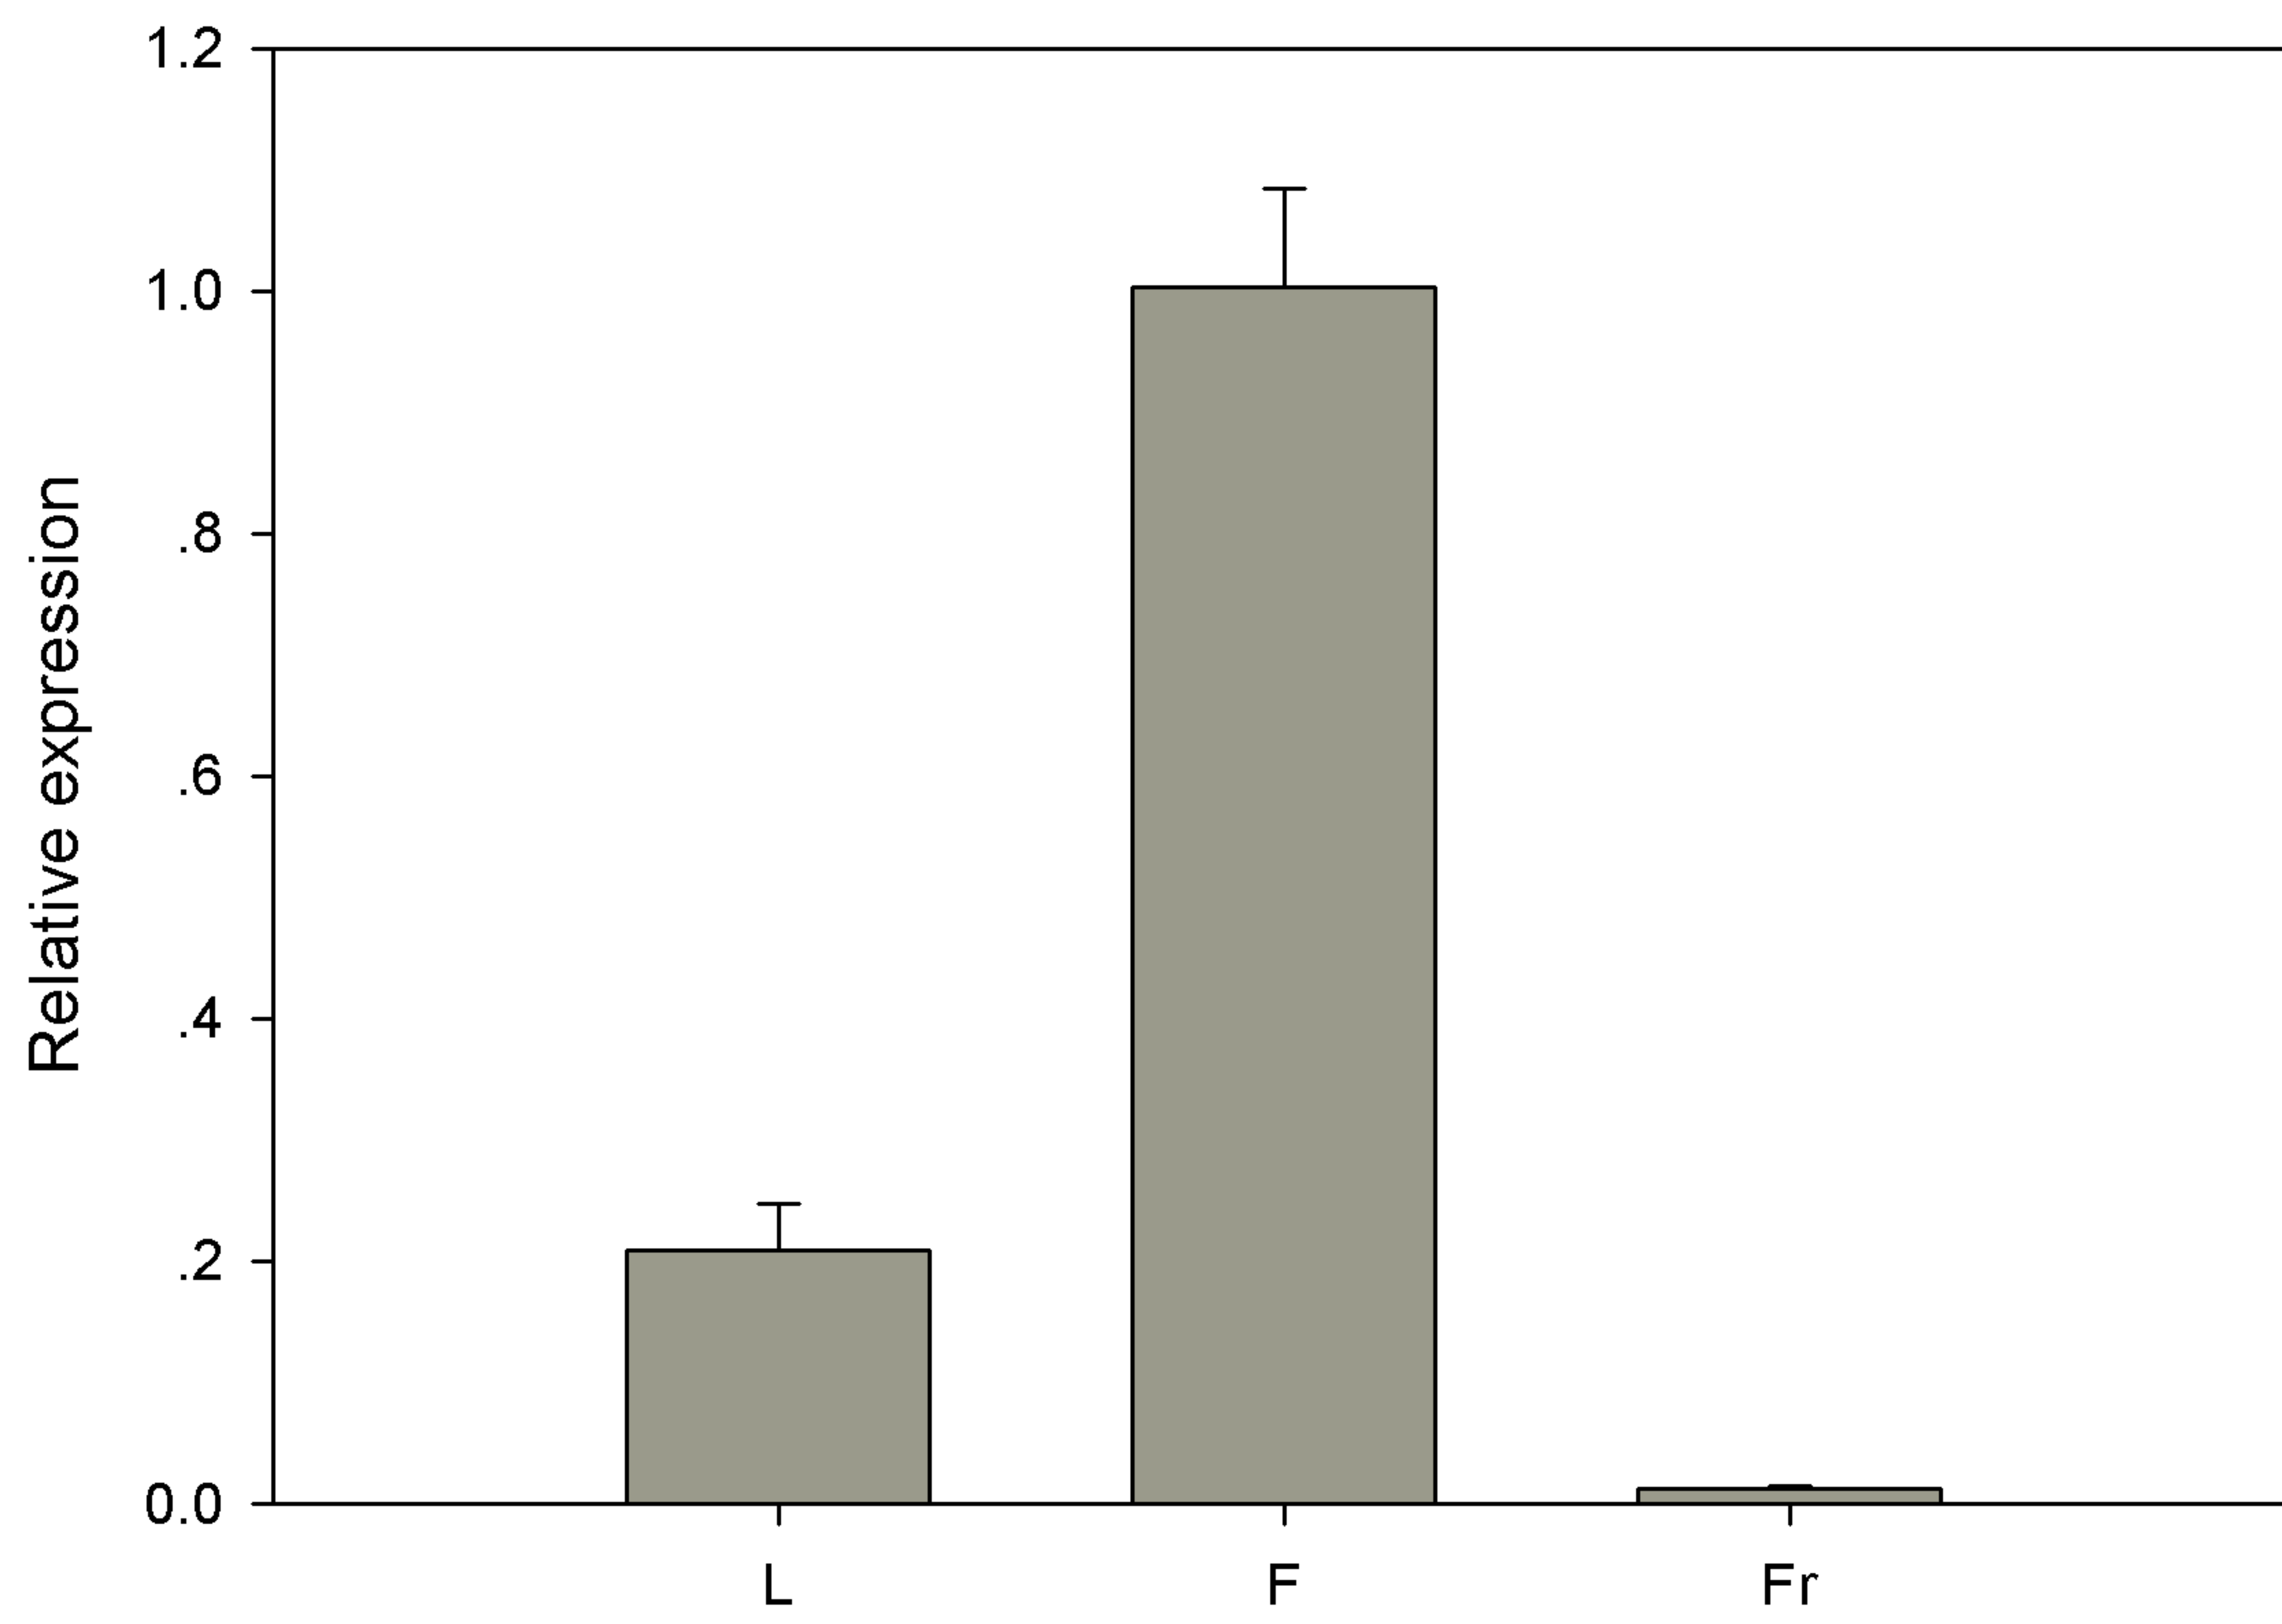

### Csi-miR172d

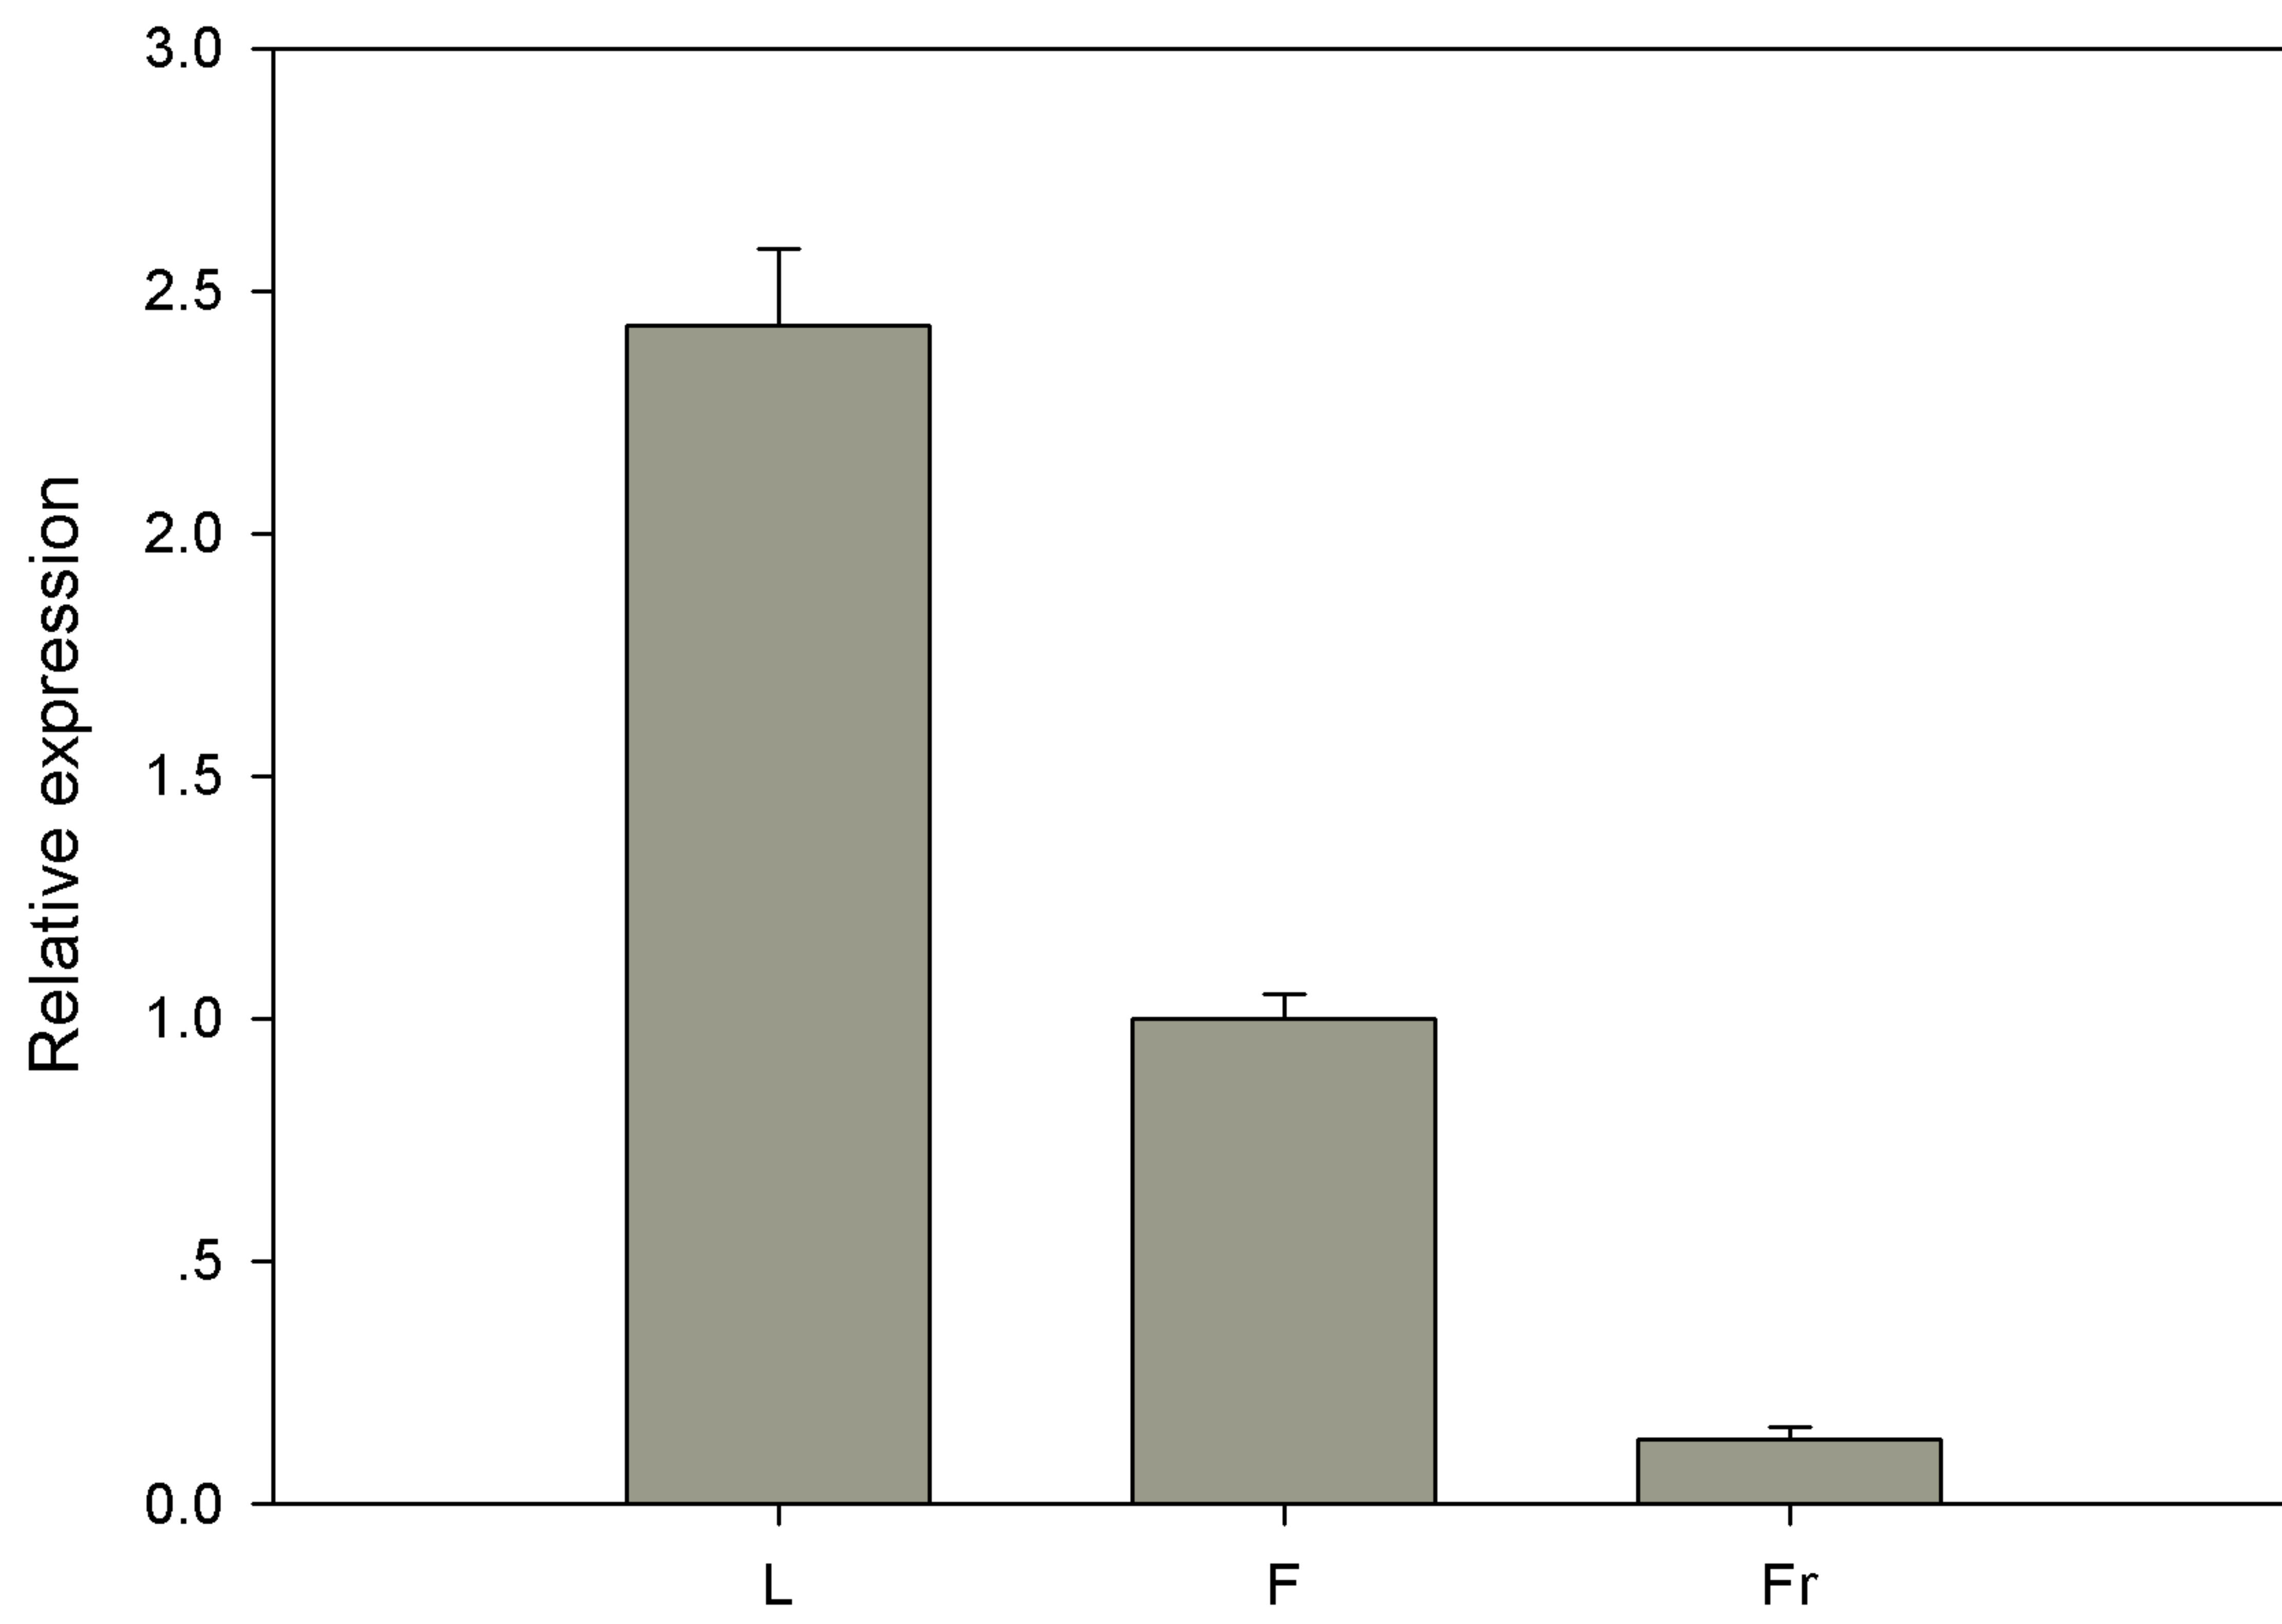

Csi-miR2275c.1

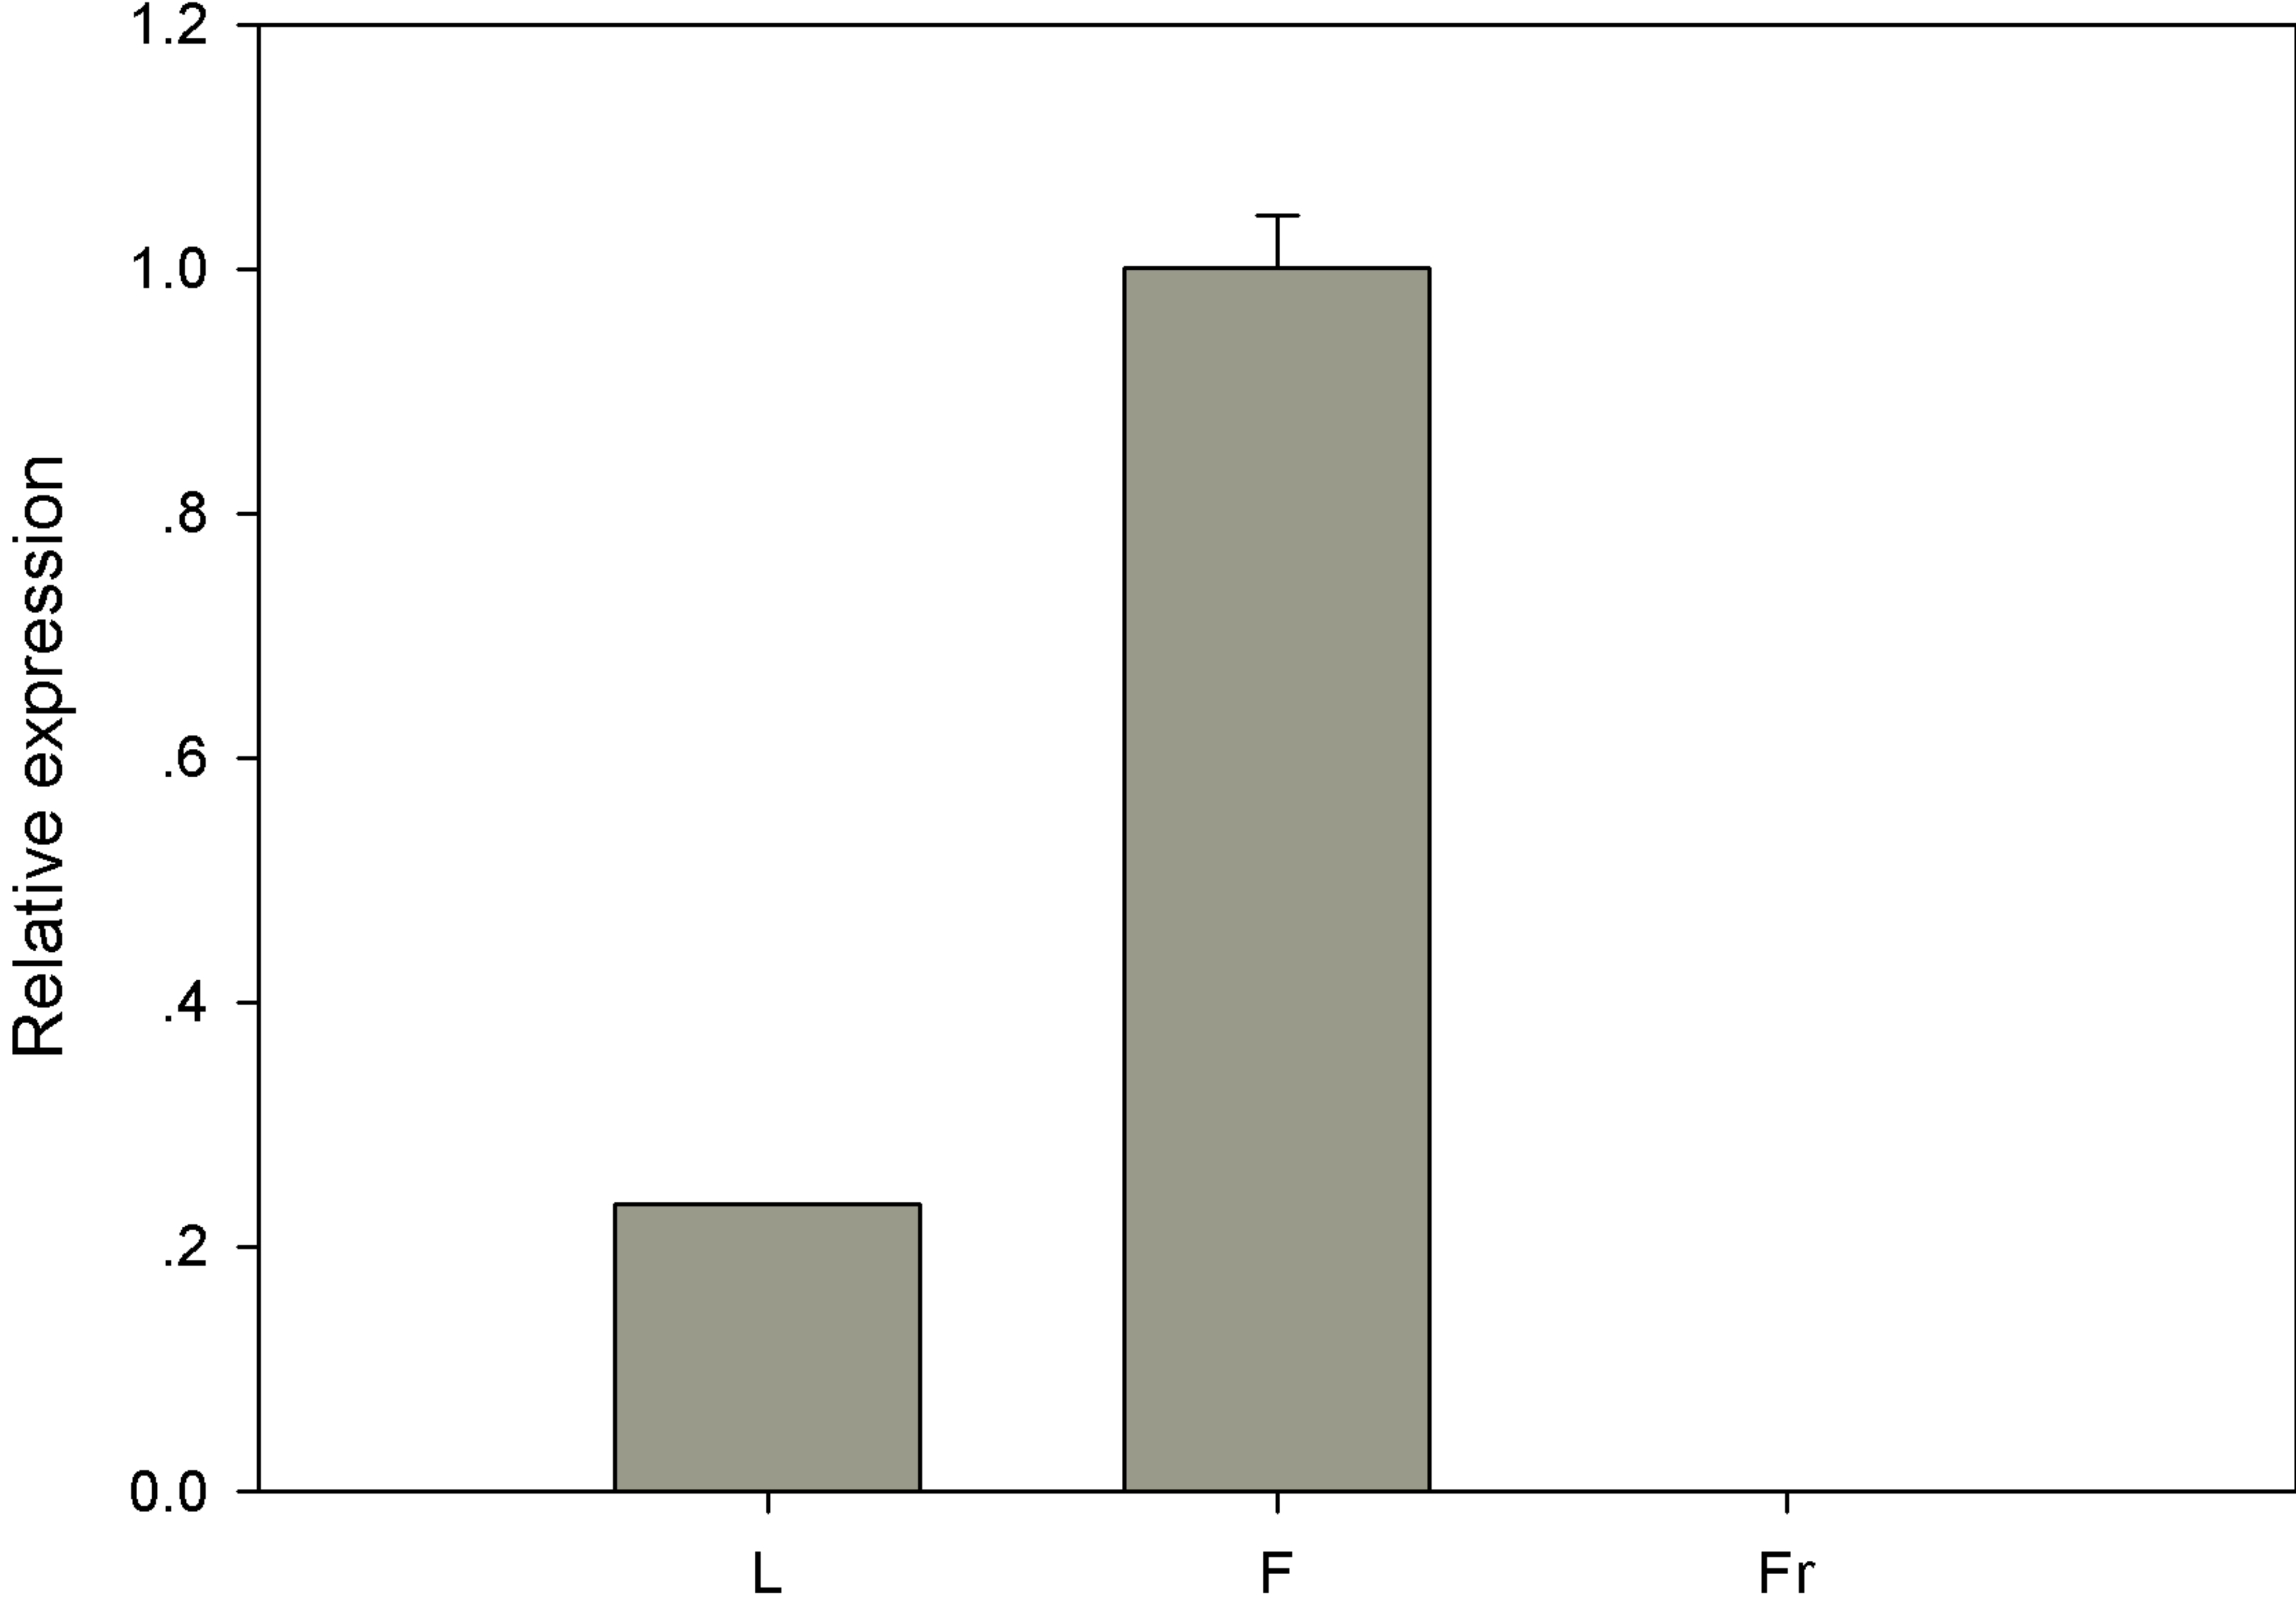

### Csi-miR2911

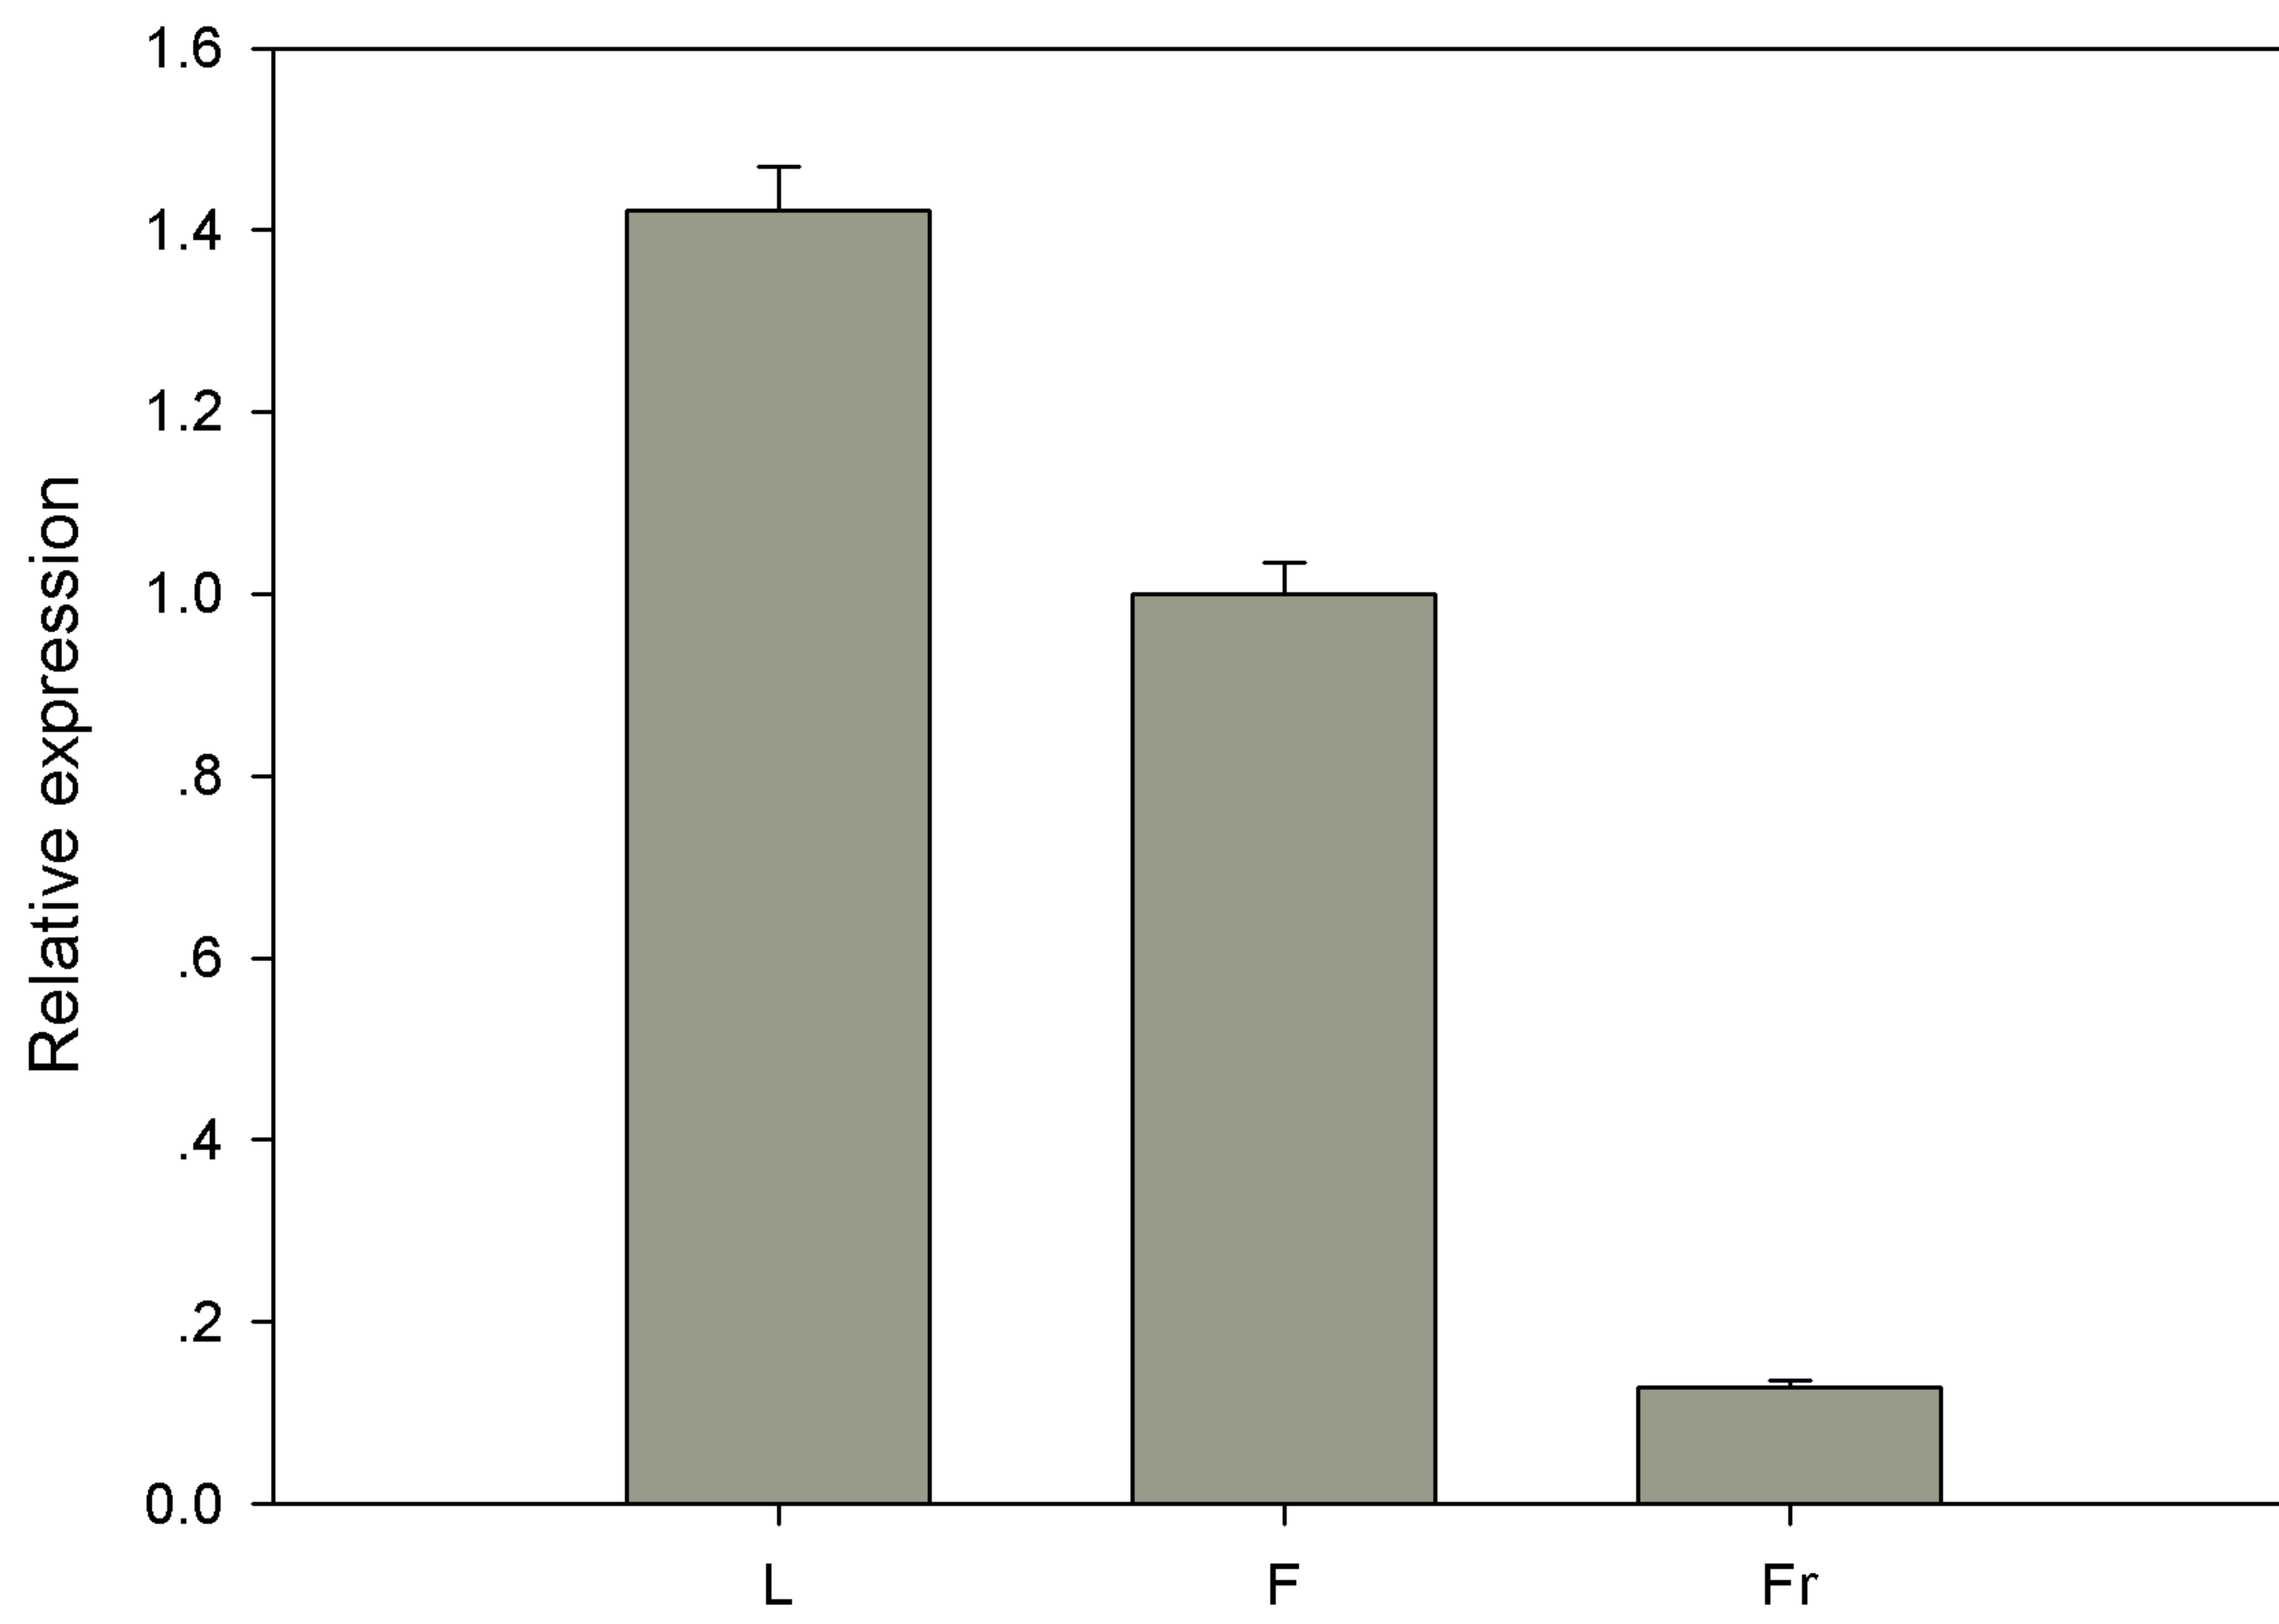

### Csi-miR390.1

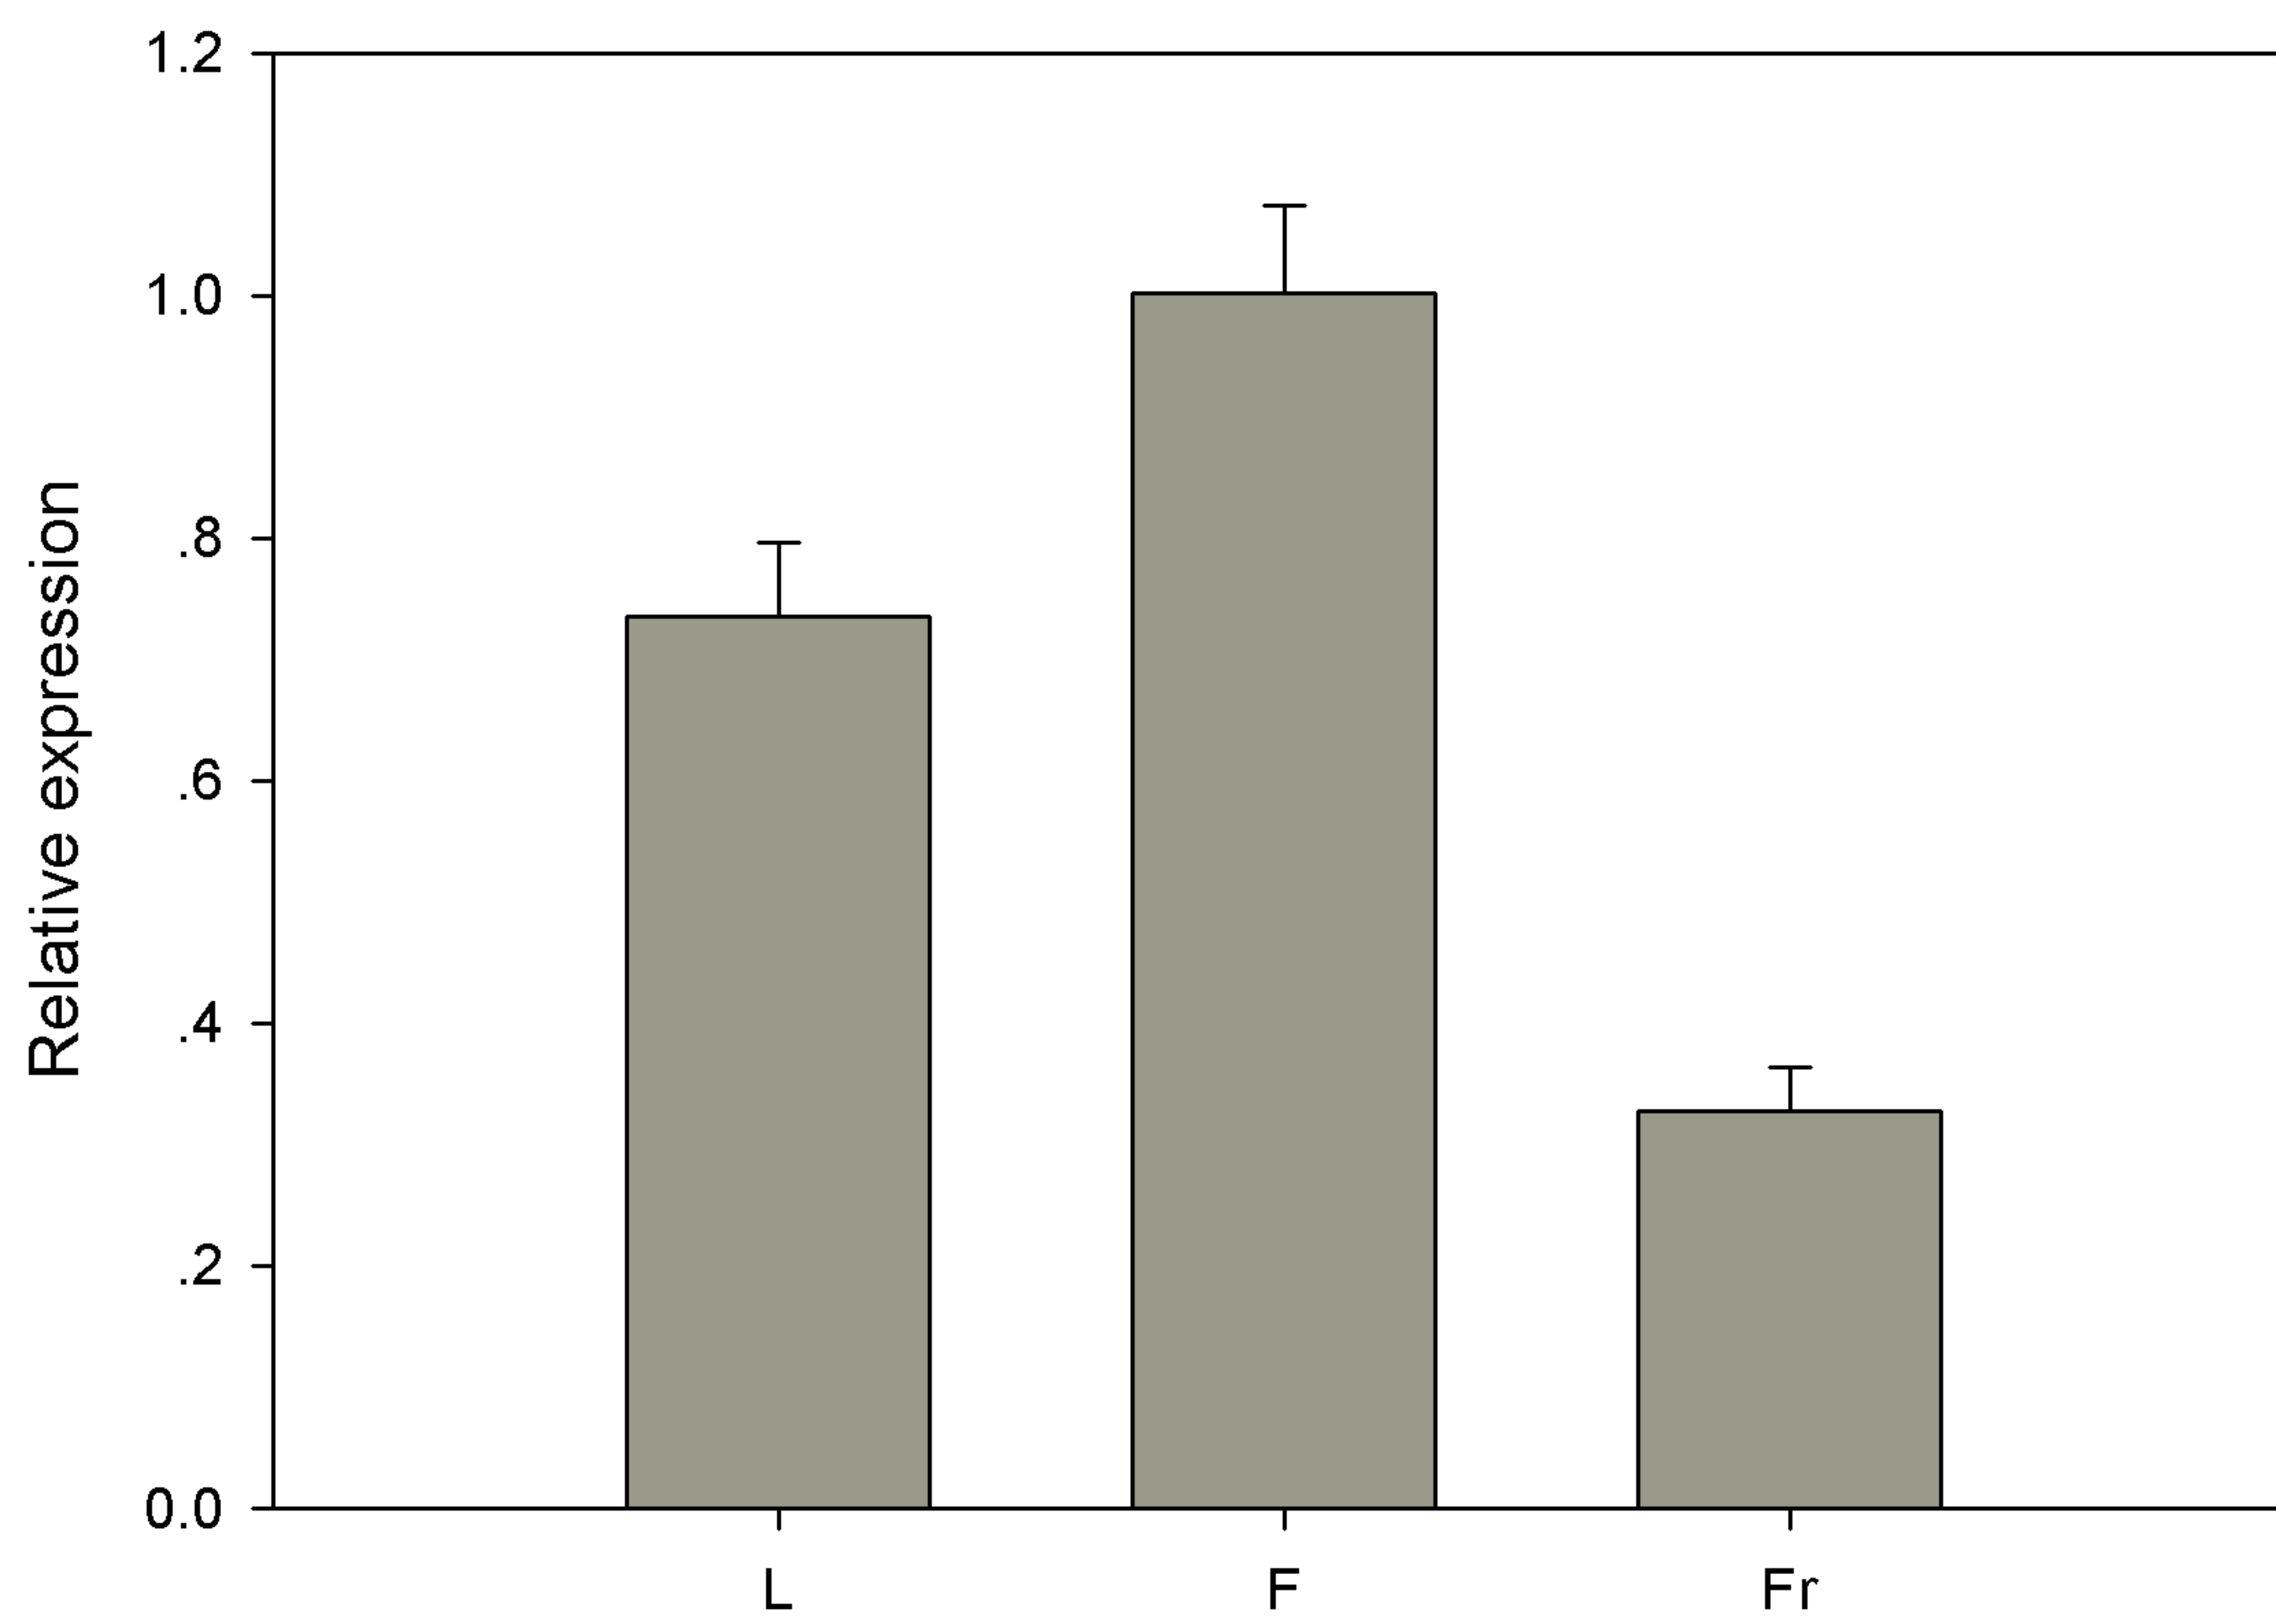

### Csi-miR390.2

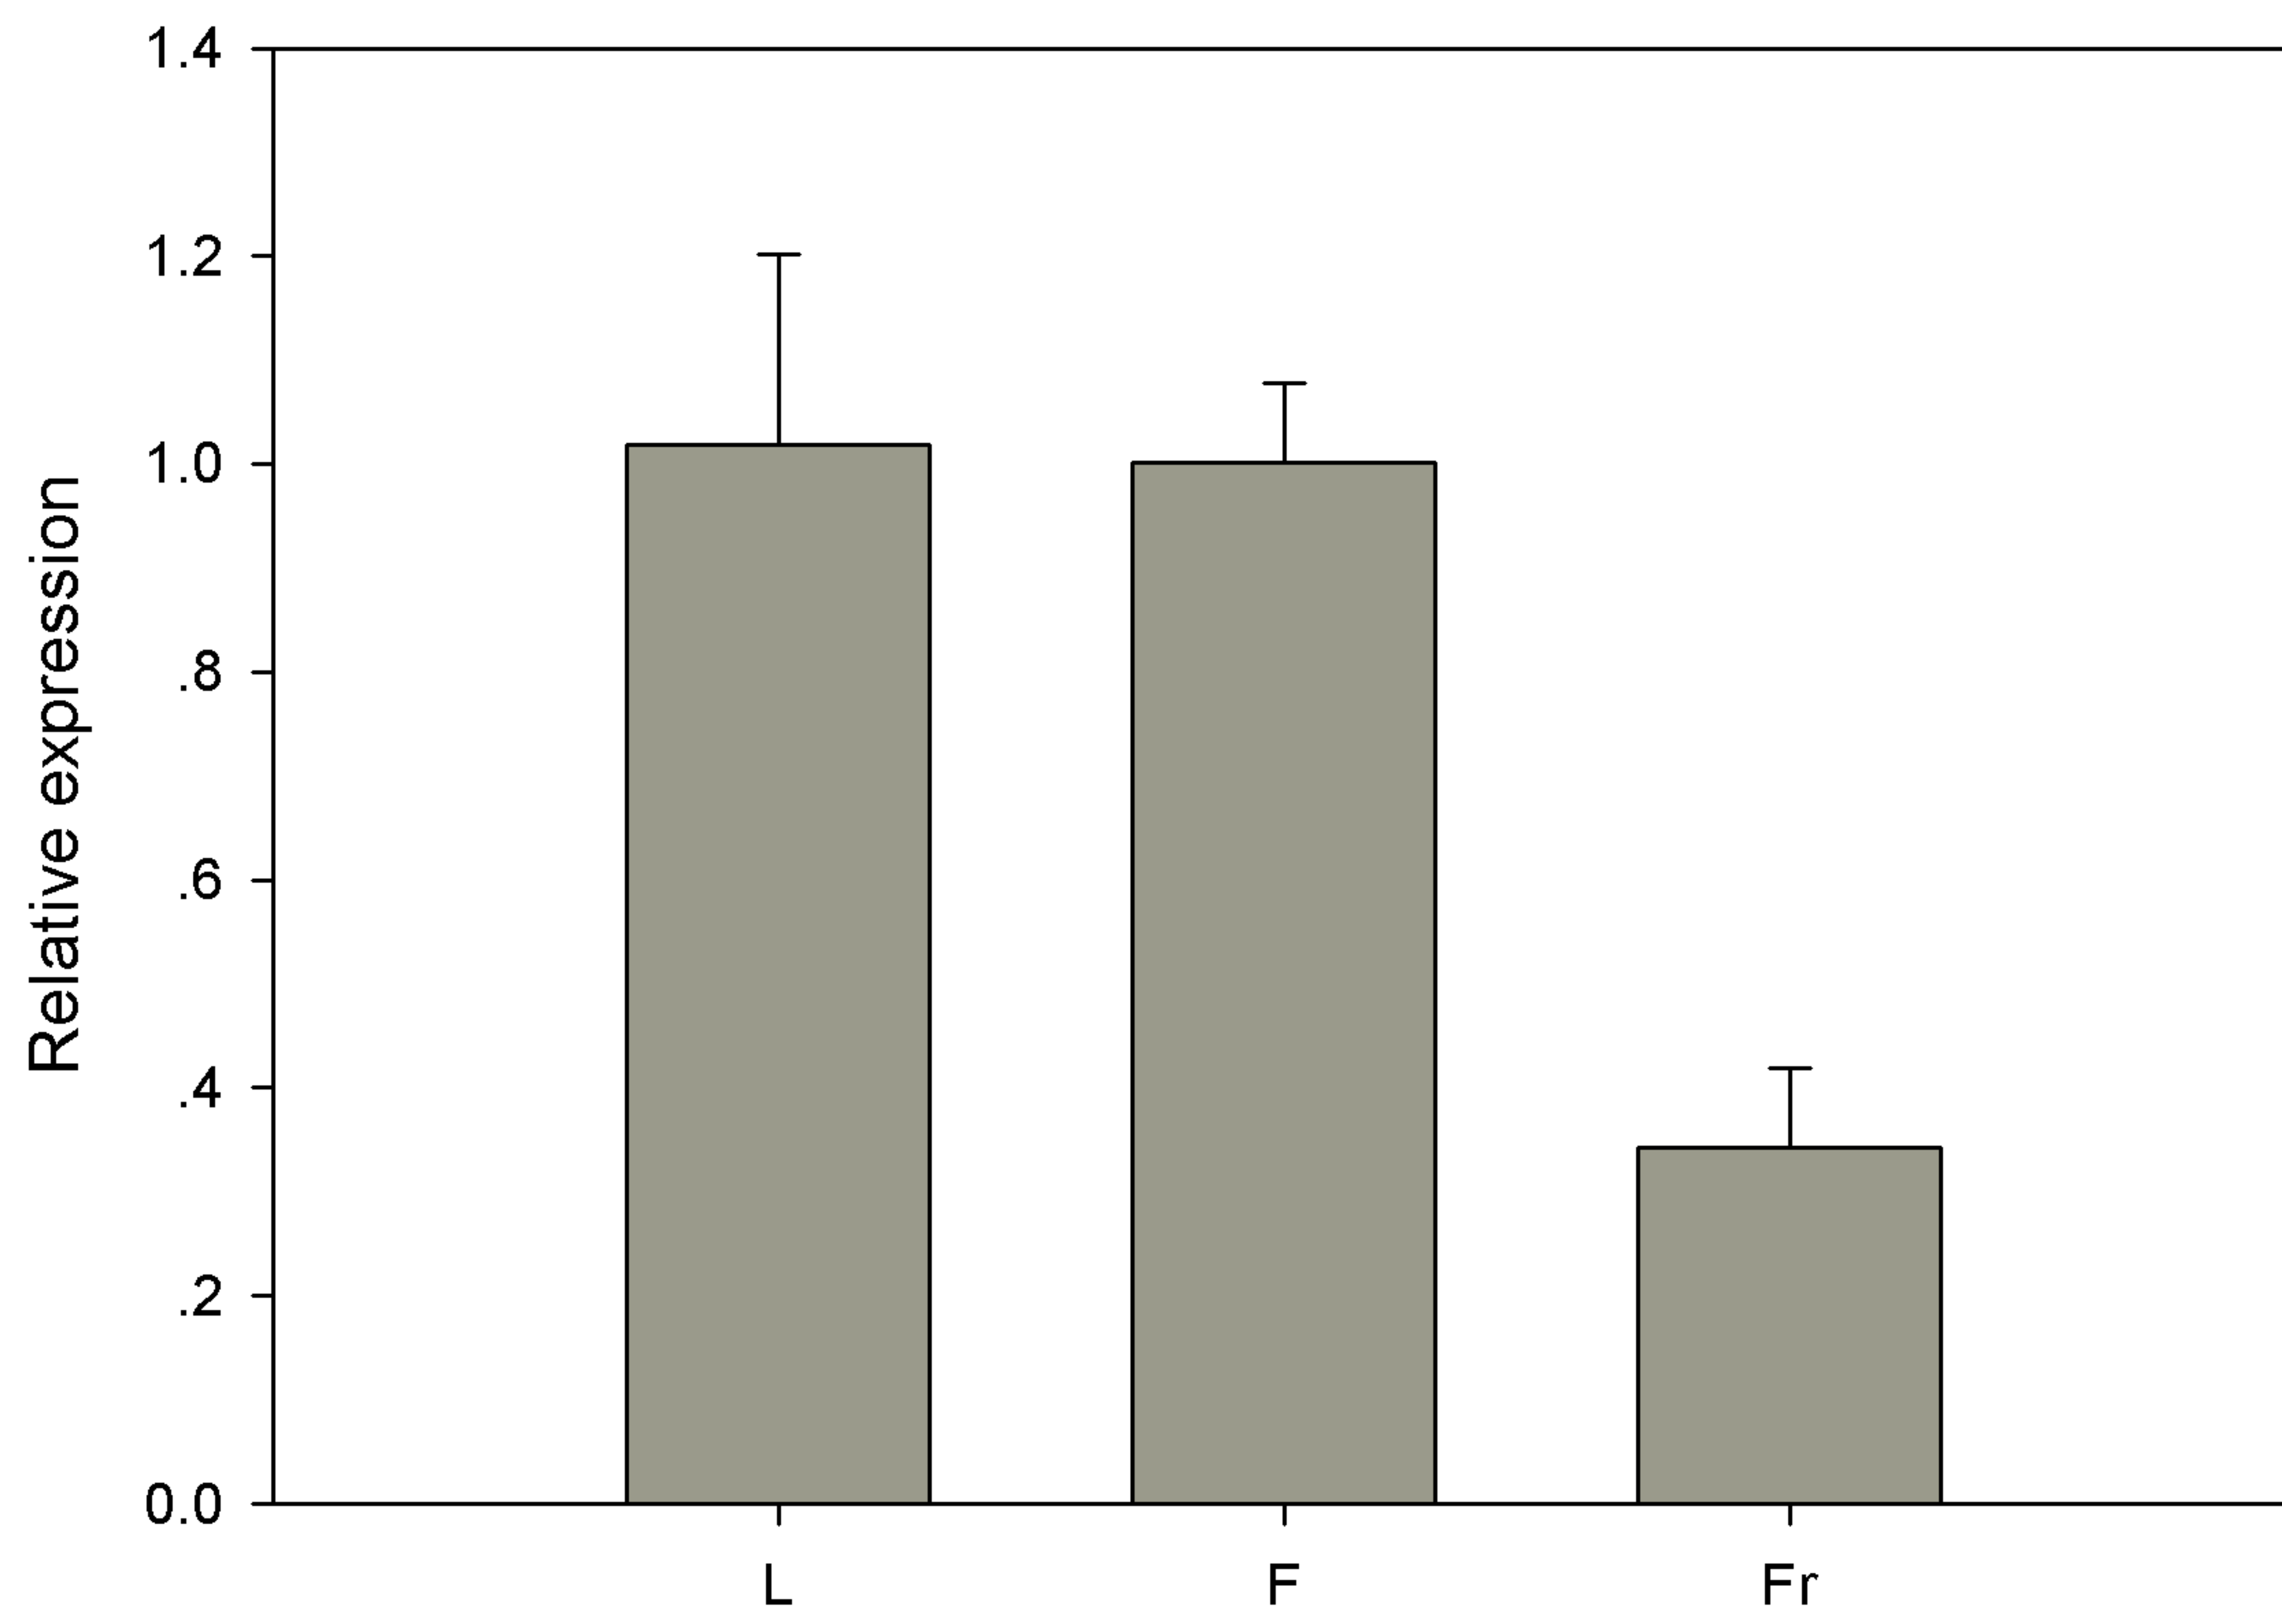

### Csi-miR390b

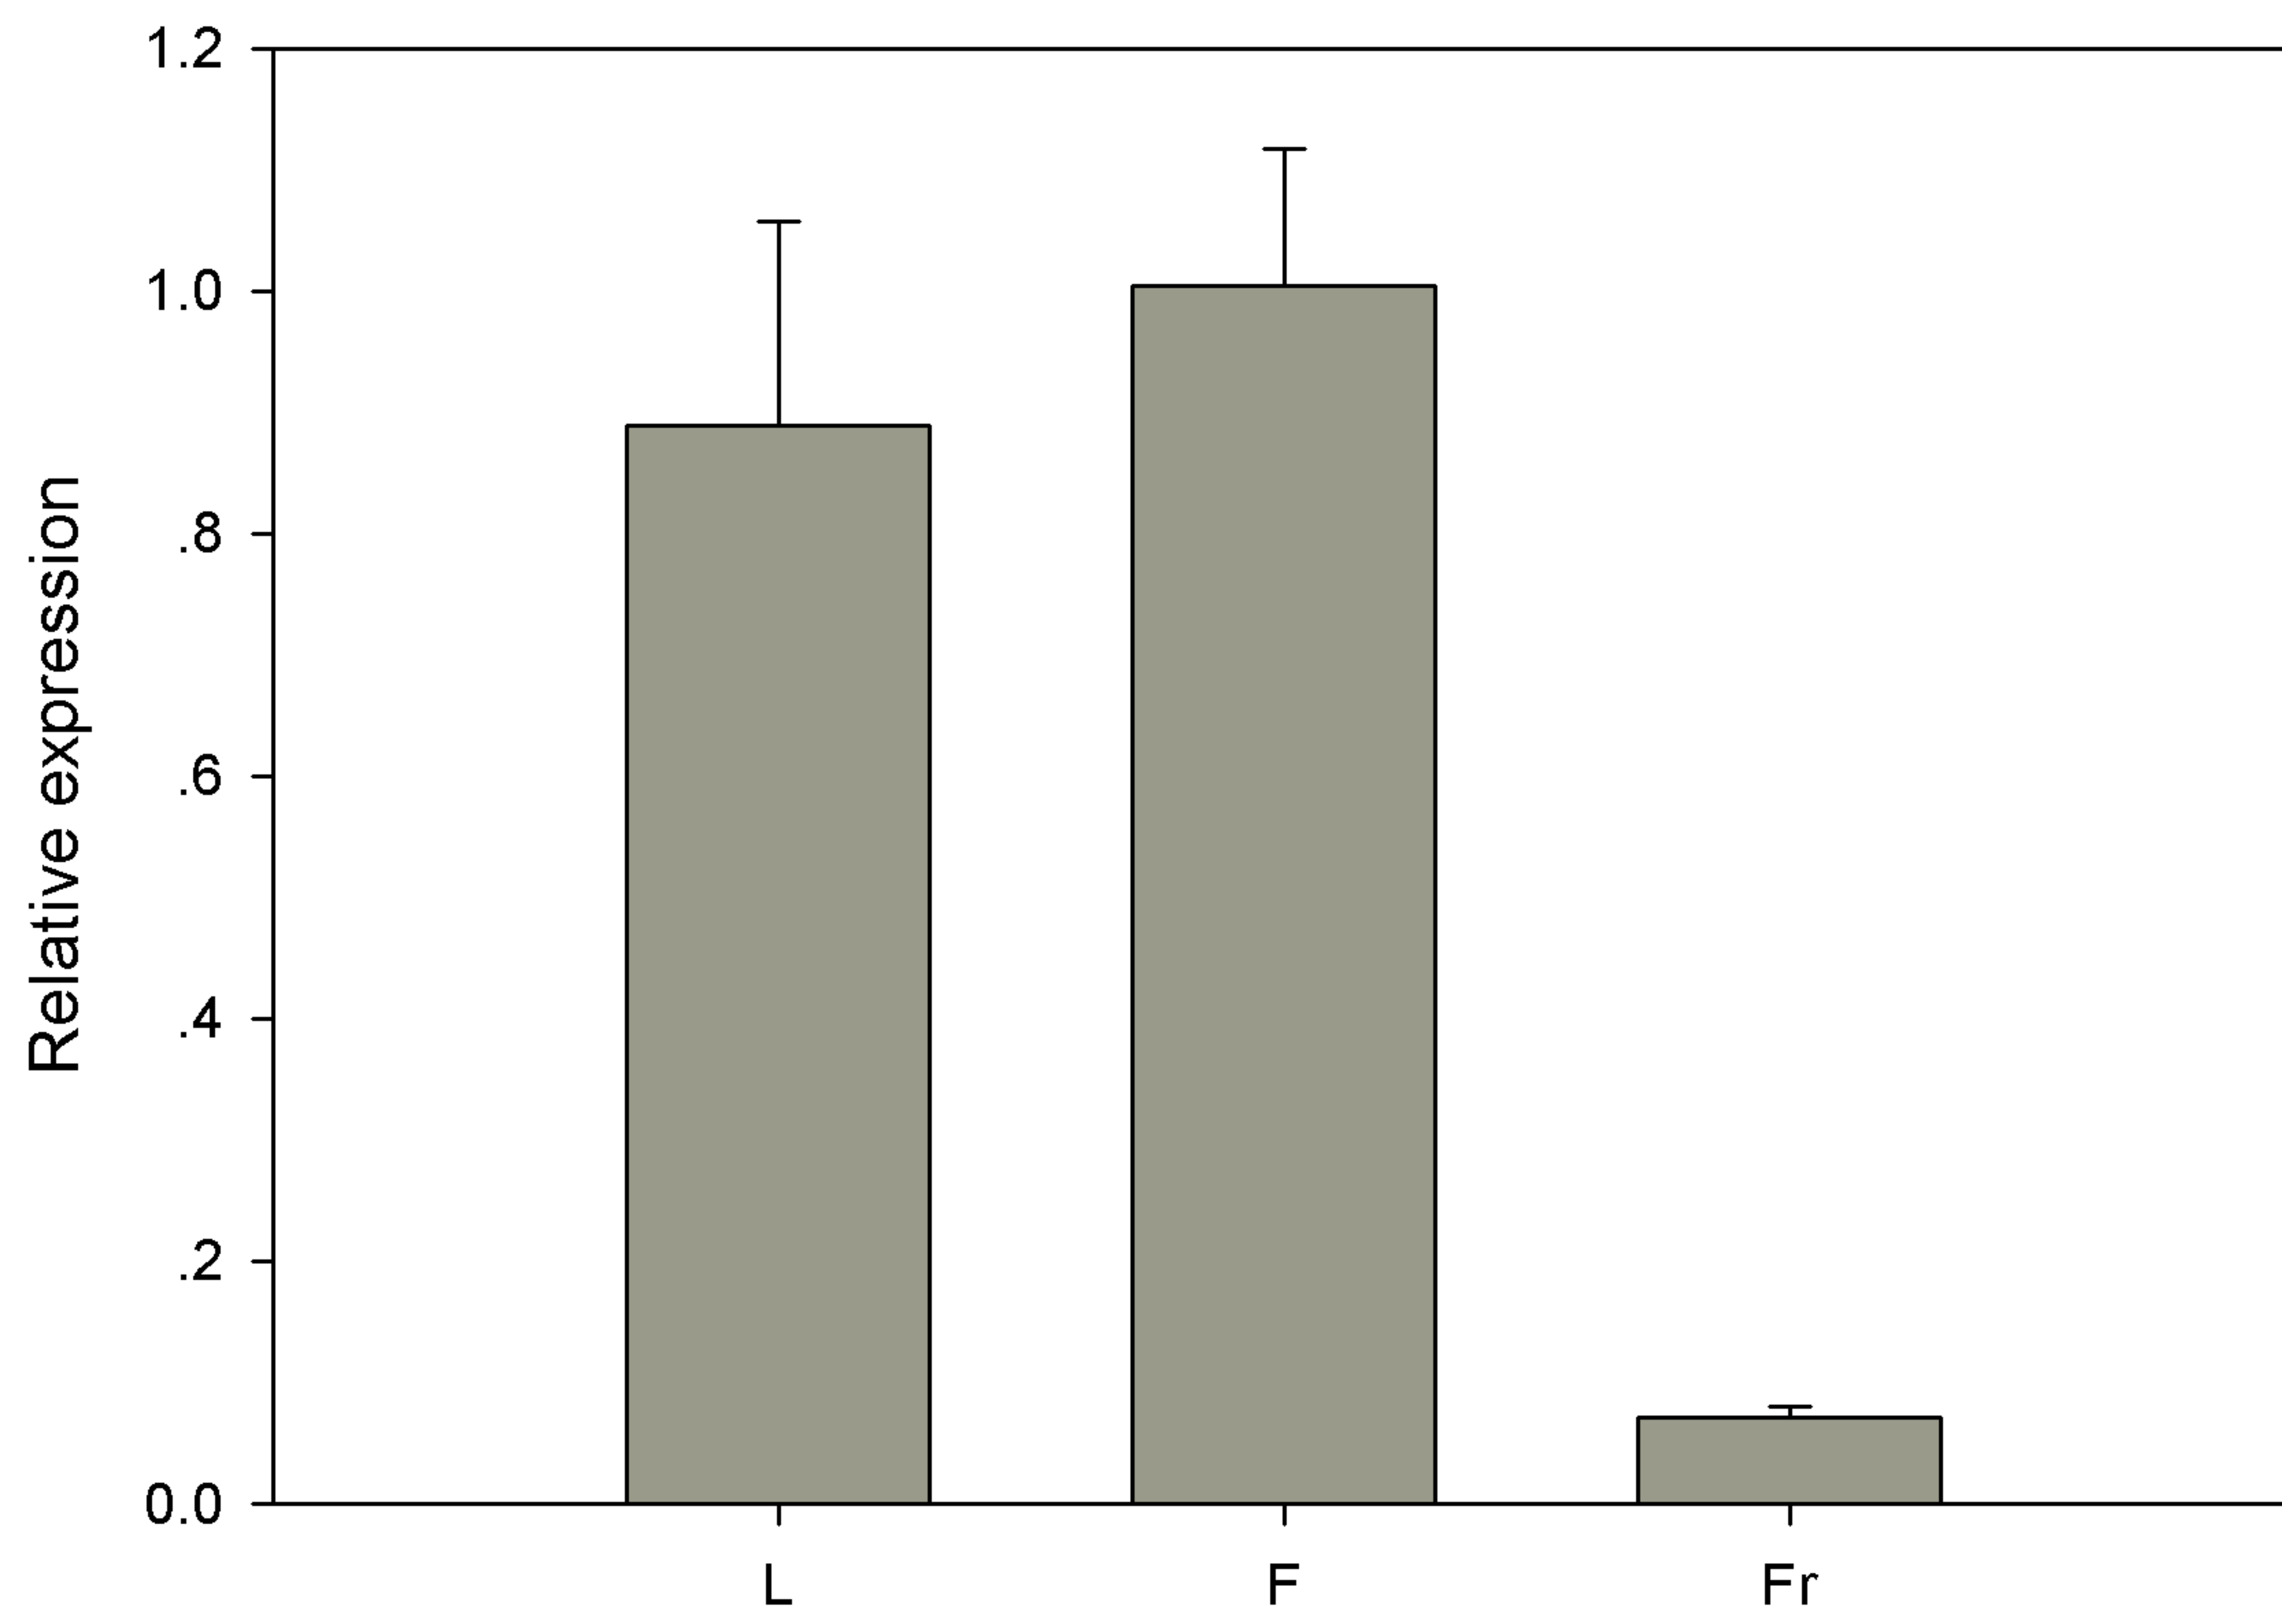

### Csi-miR391b

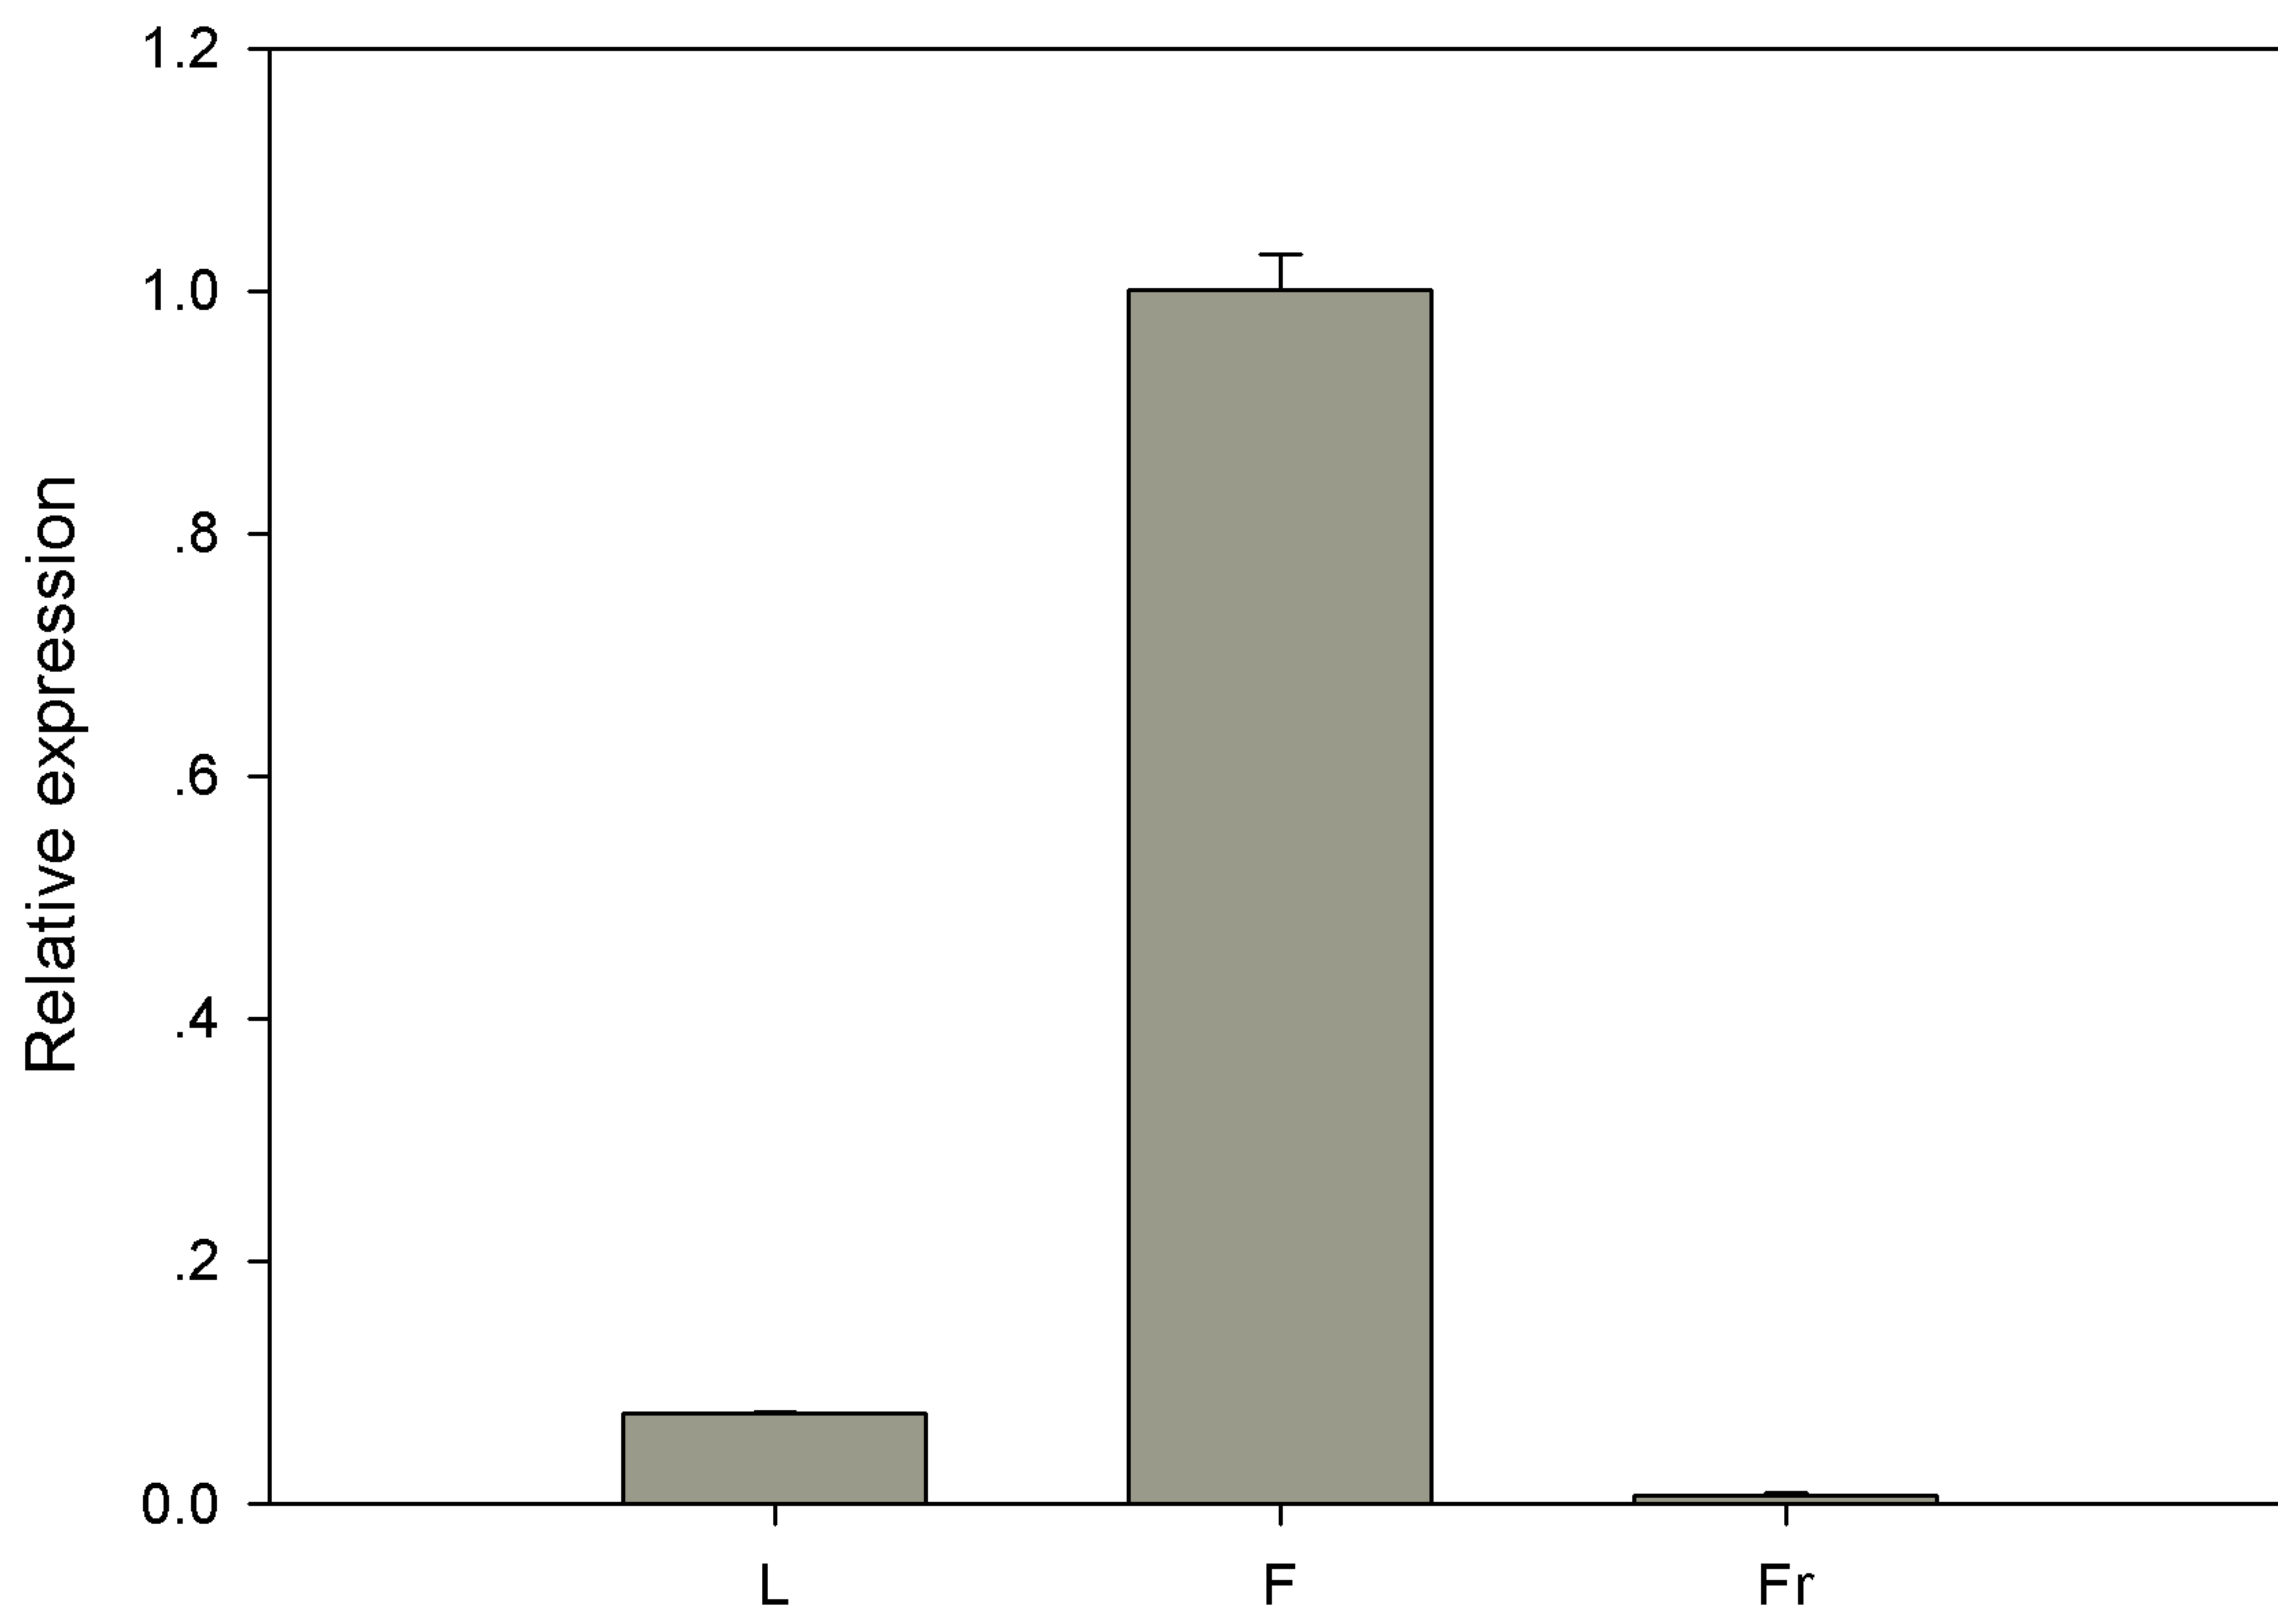



### Csi-miR393b

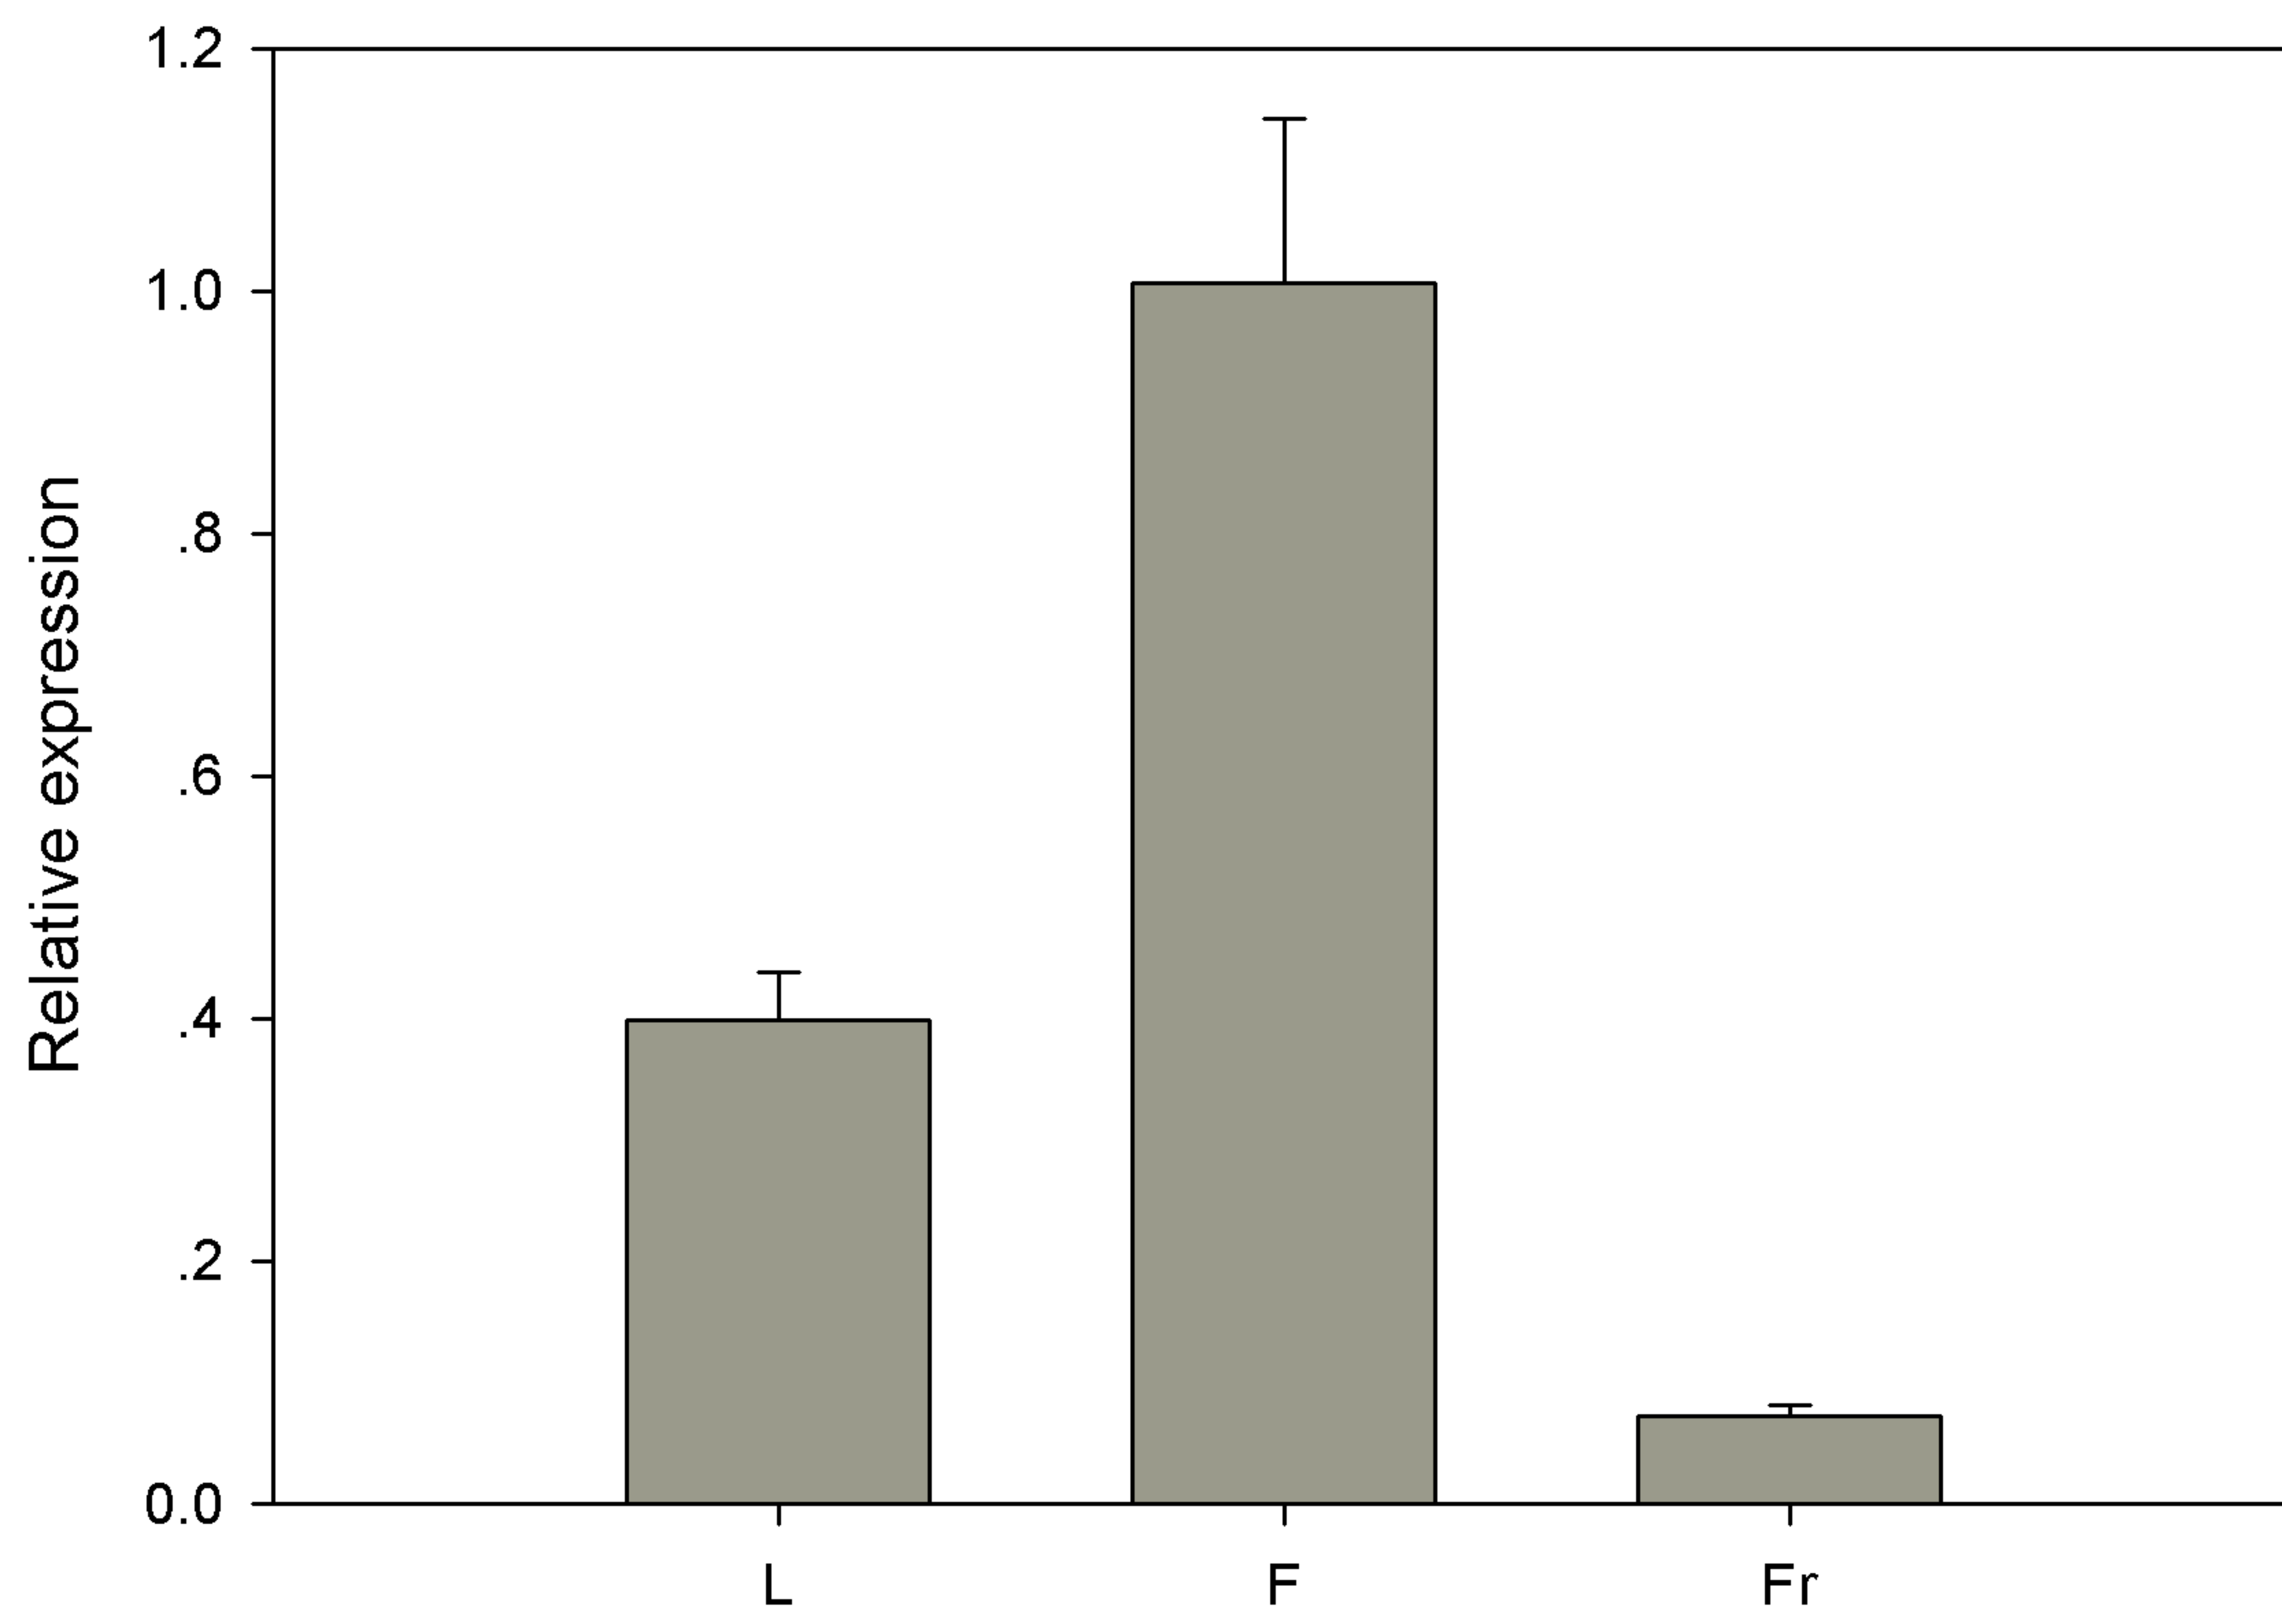

### Csi-miR394-3p.2

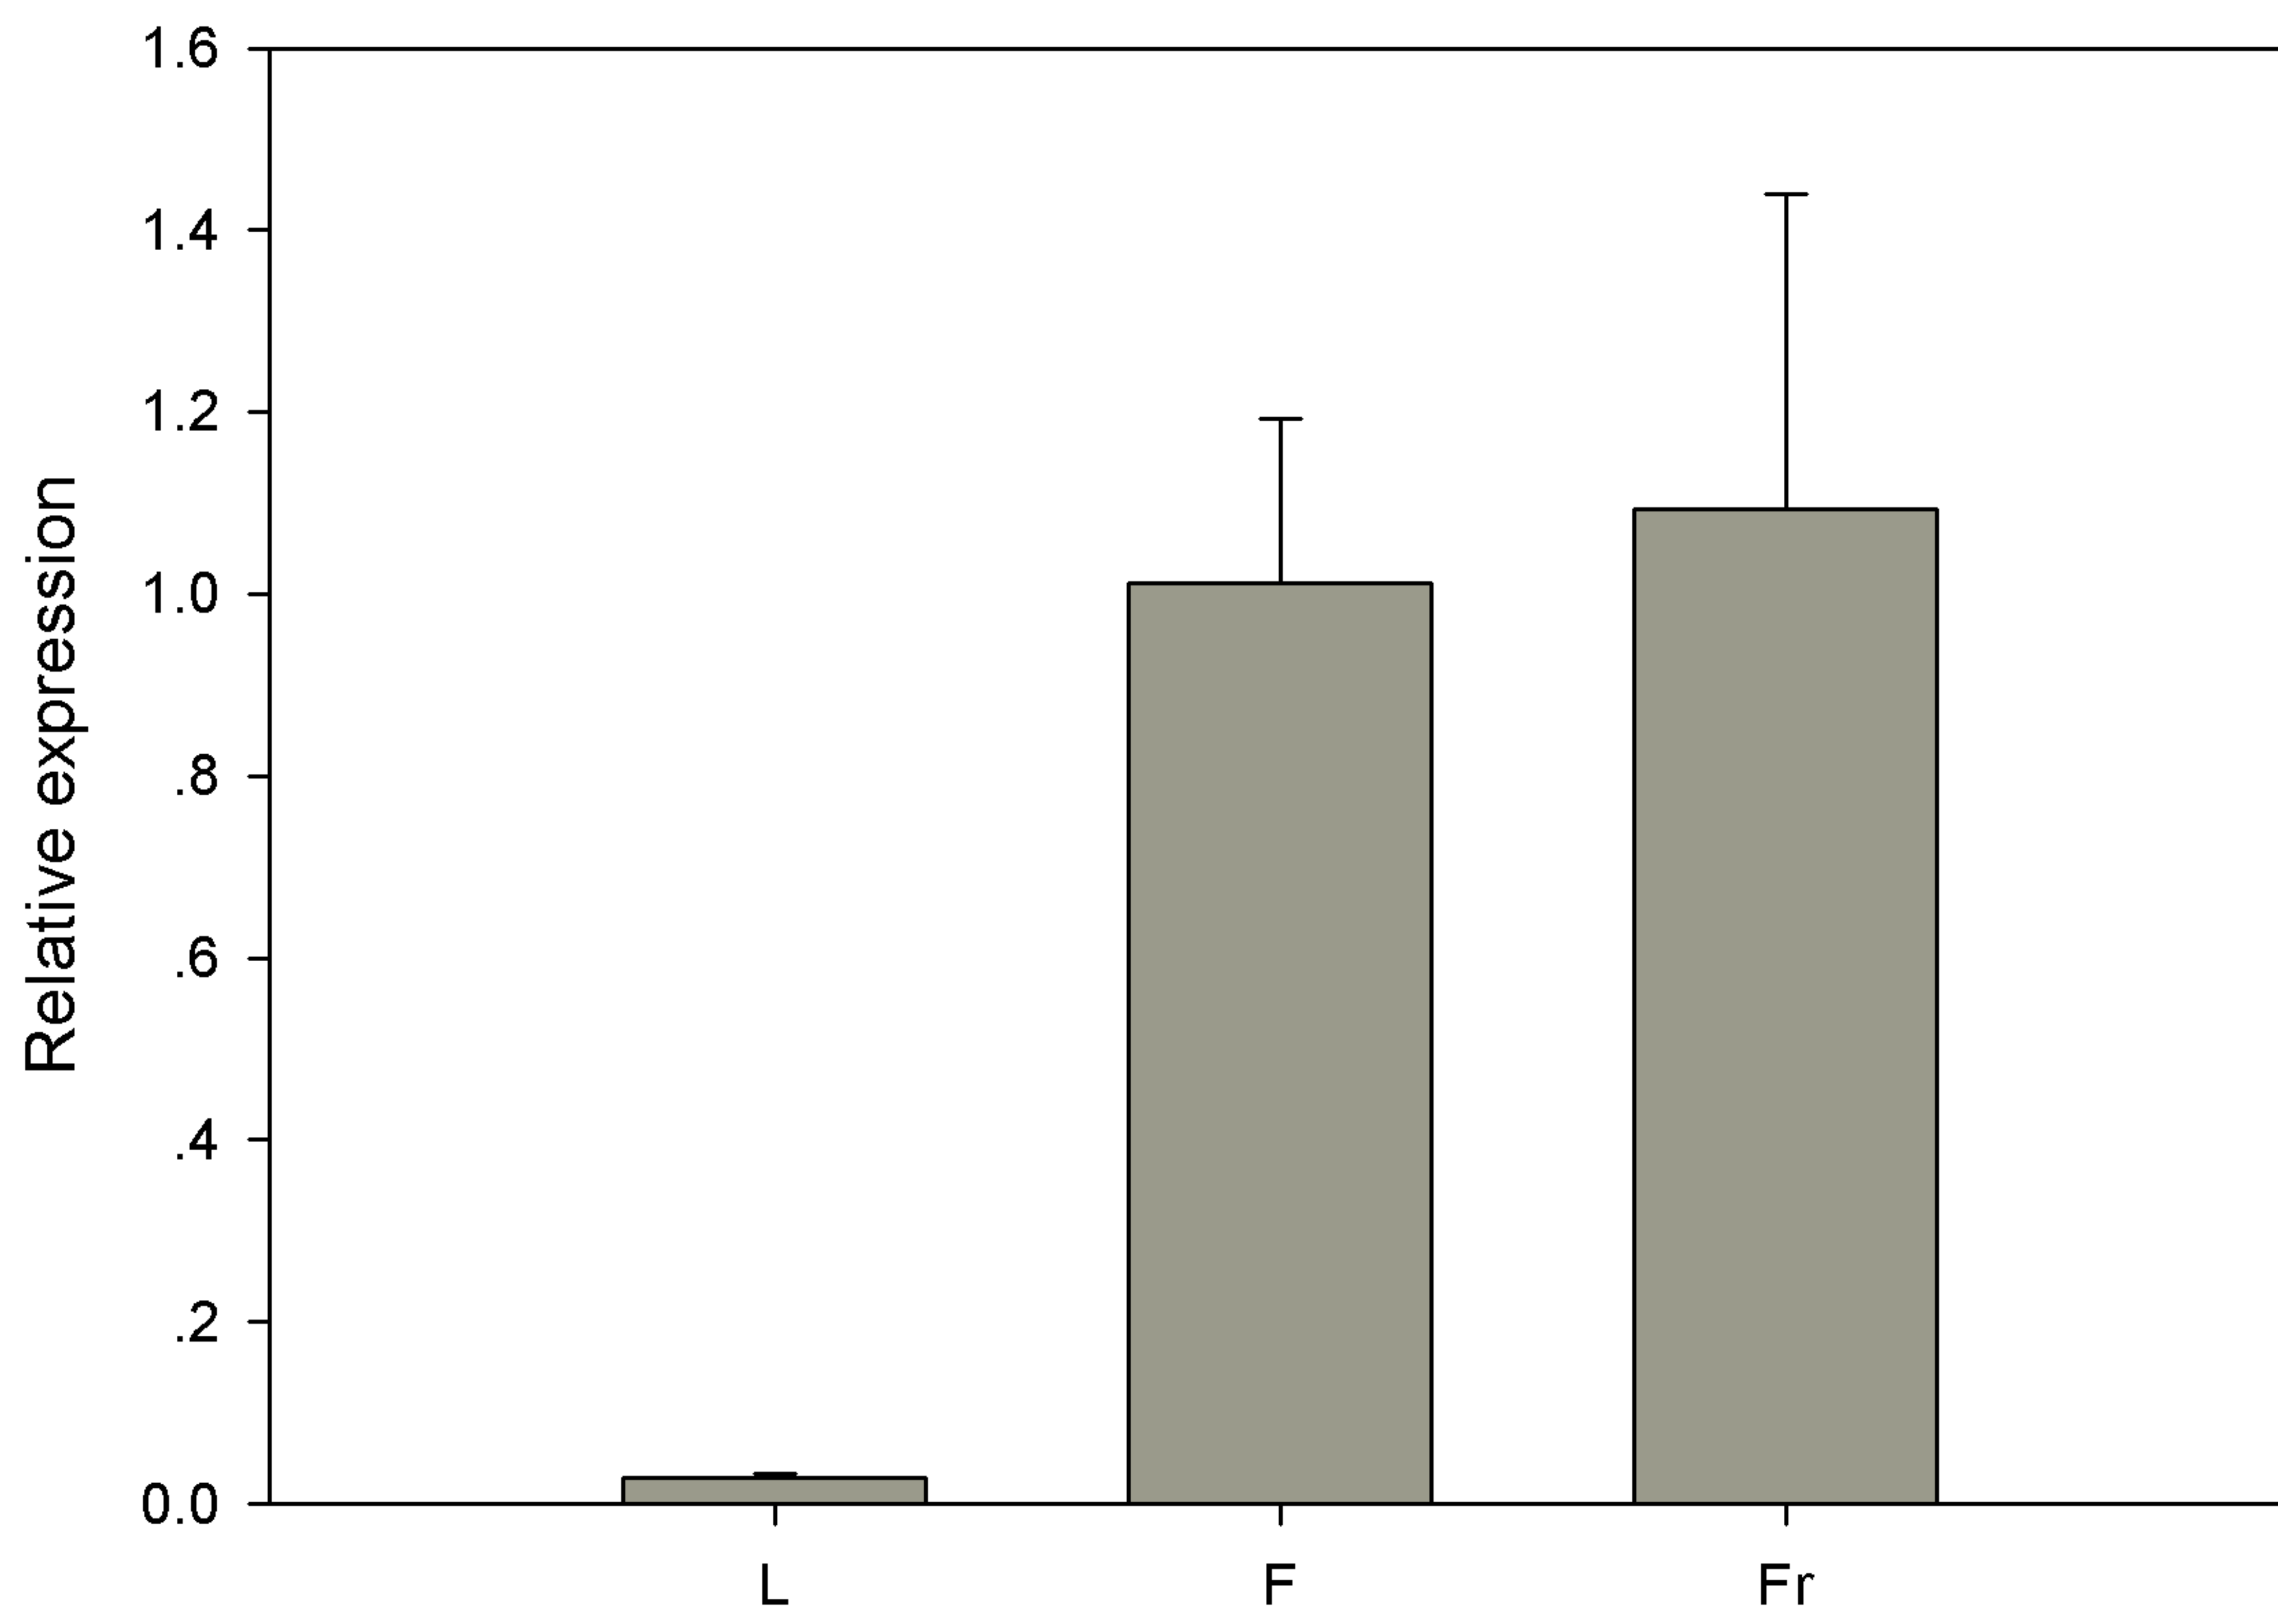

### Csi-miR395.1

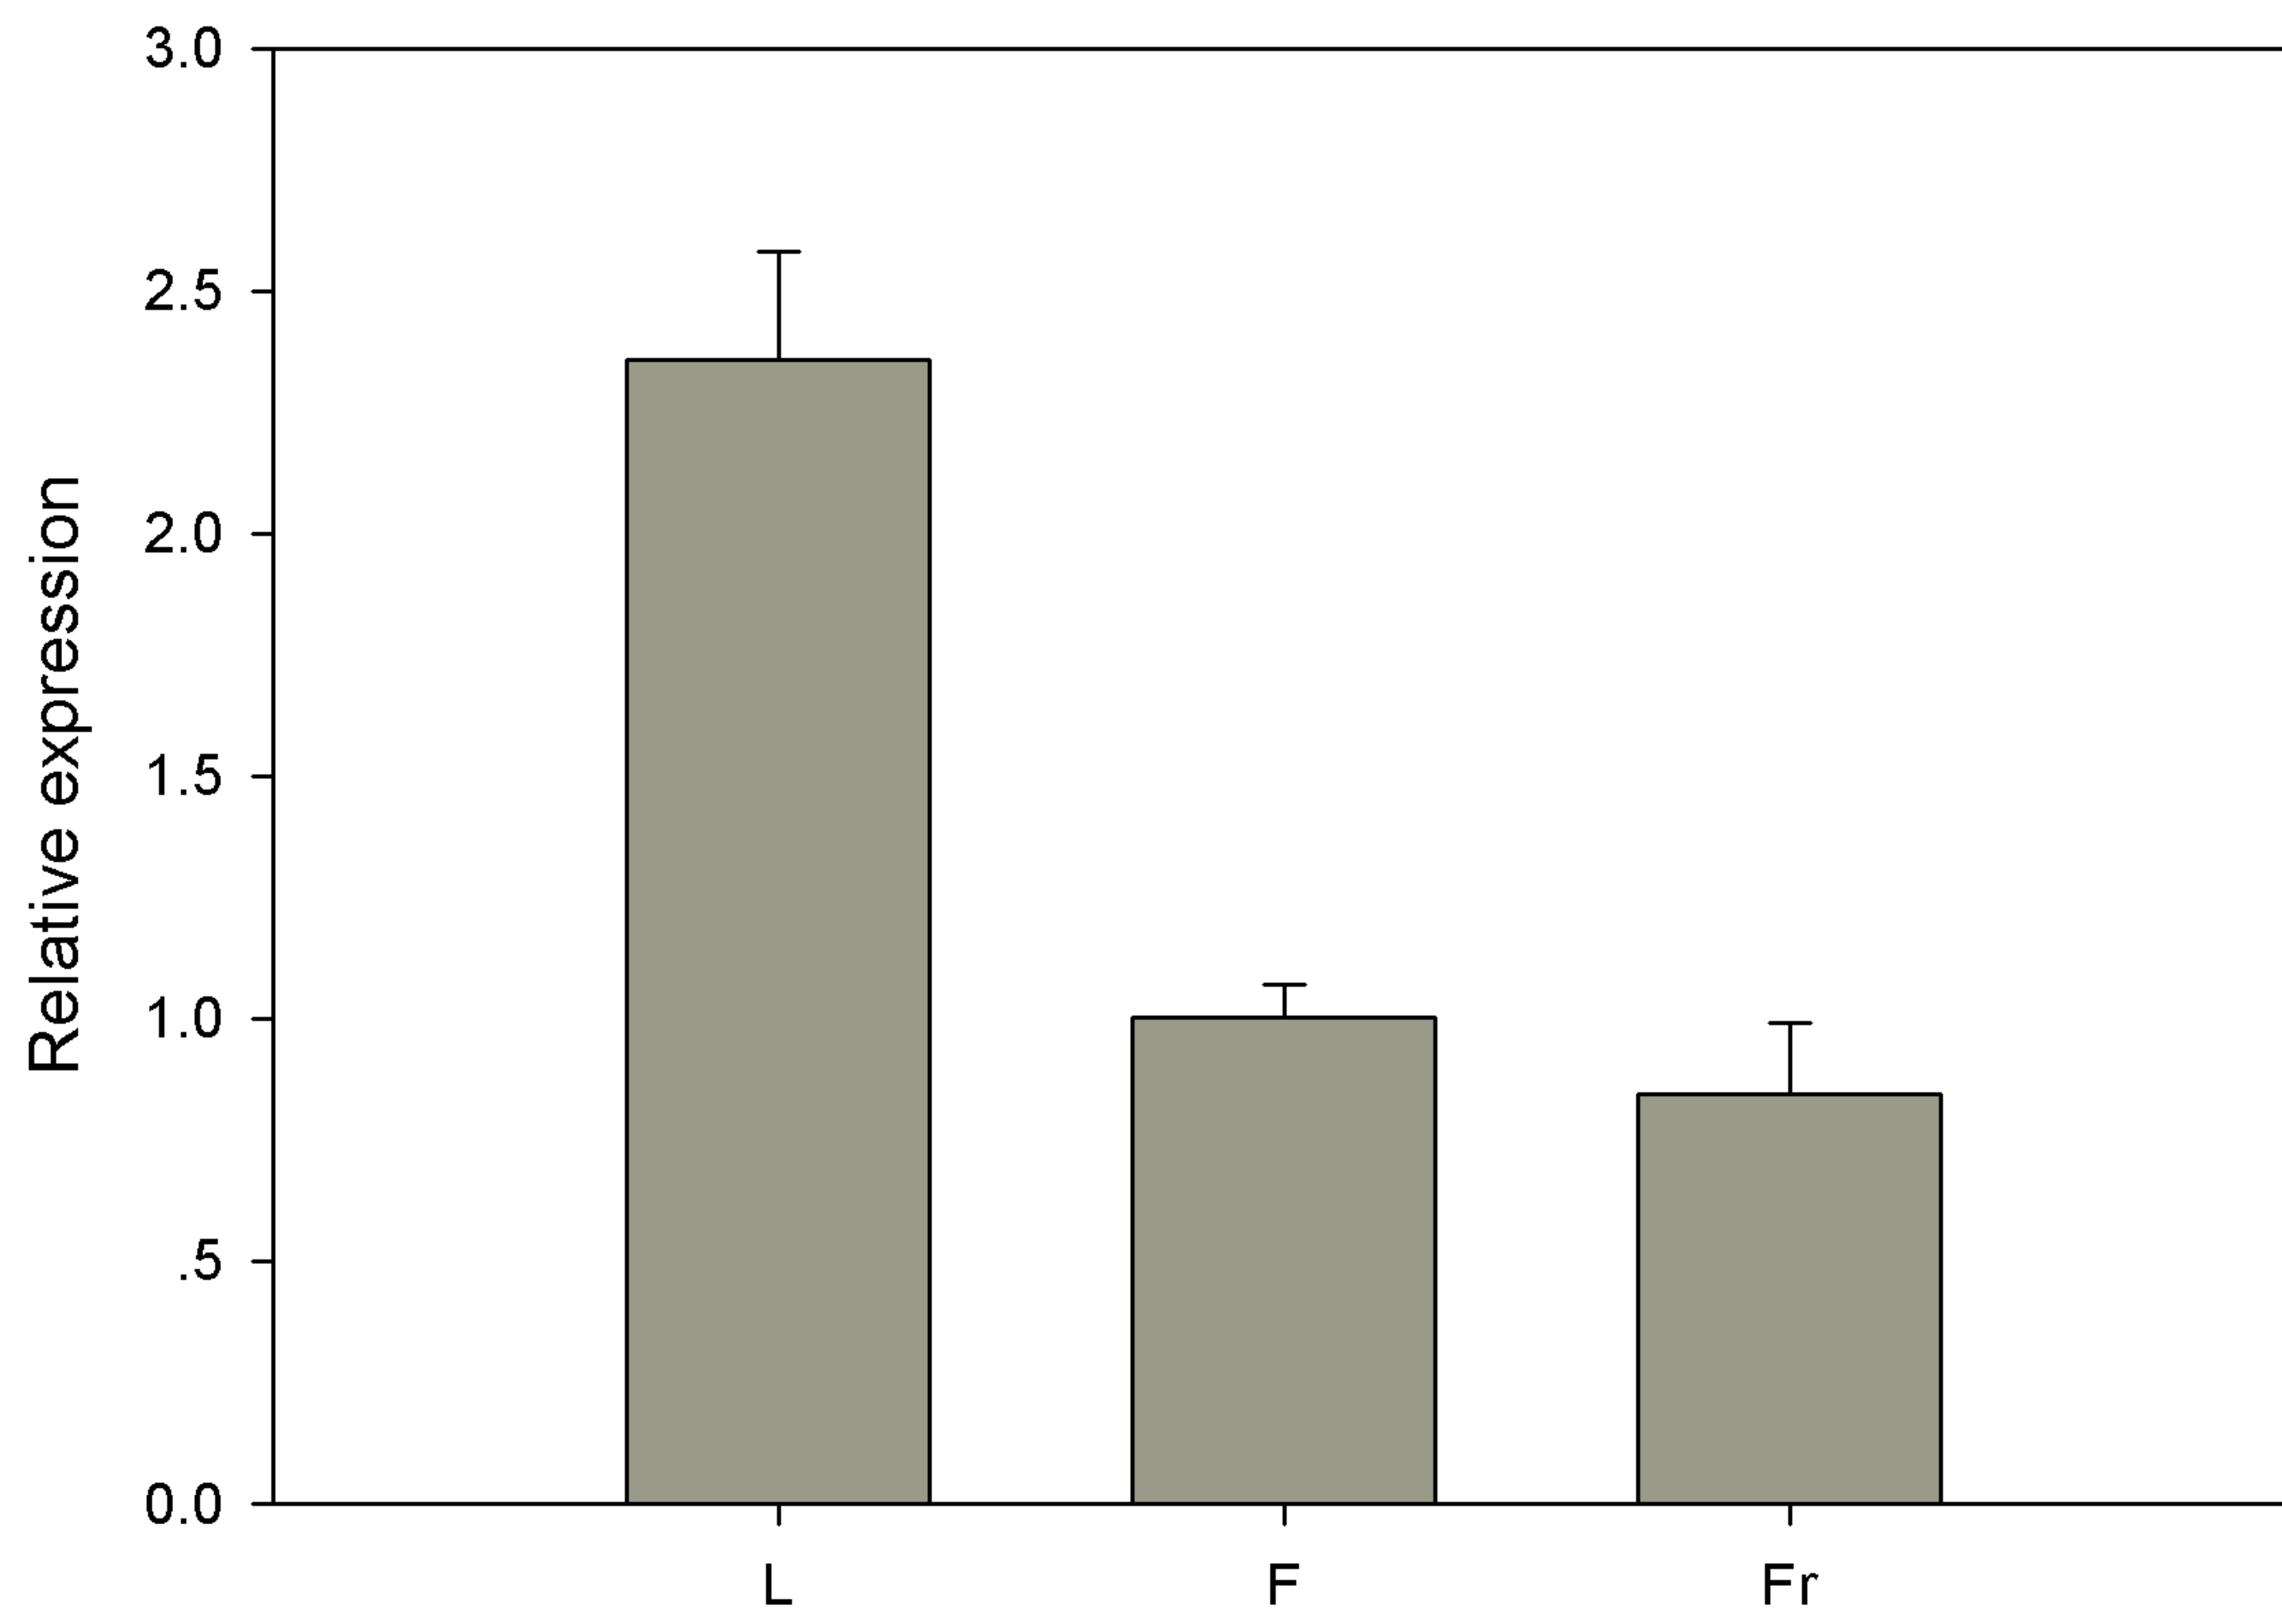

### Csi-miR3951

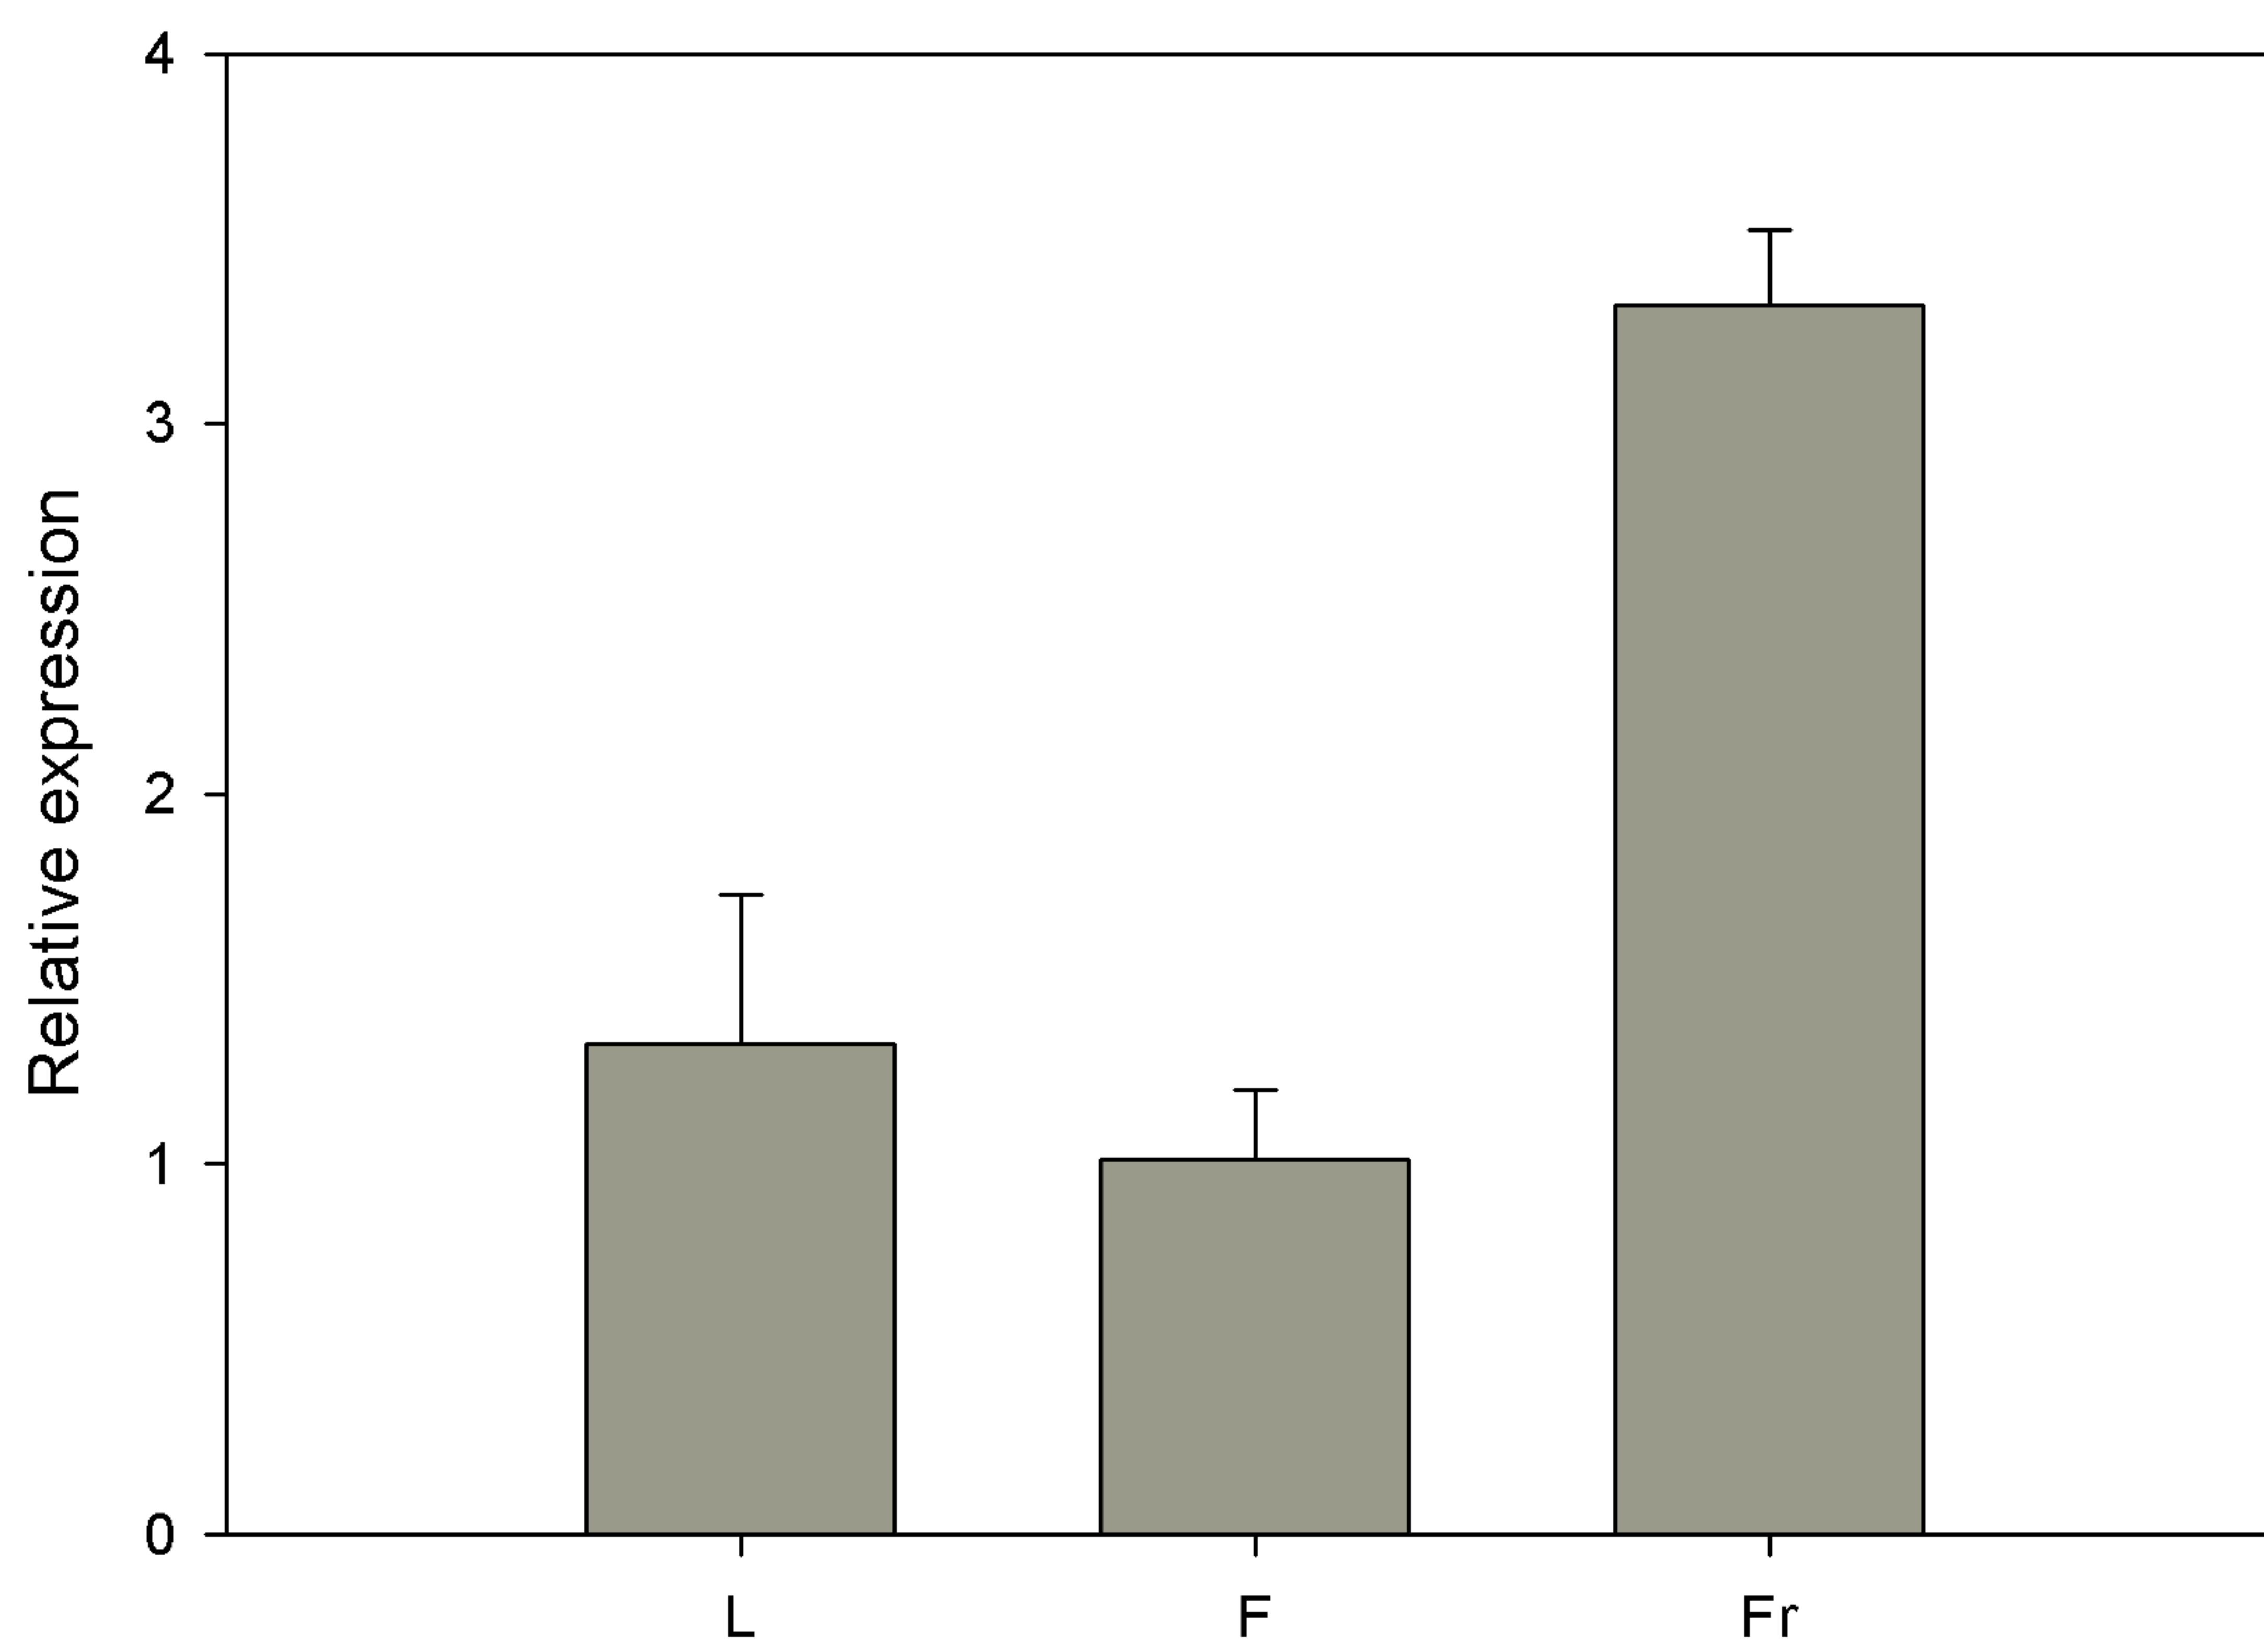

### Csi-miR3951-3p

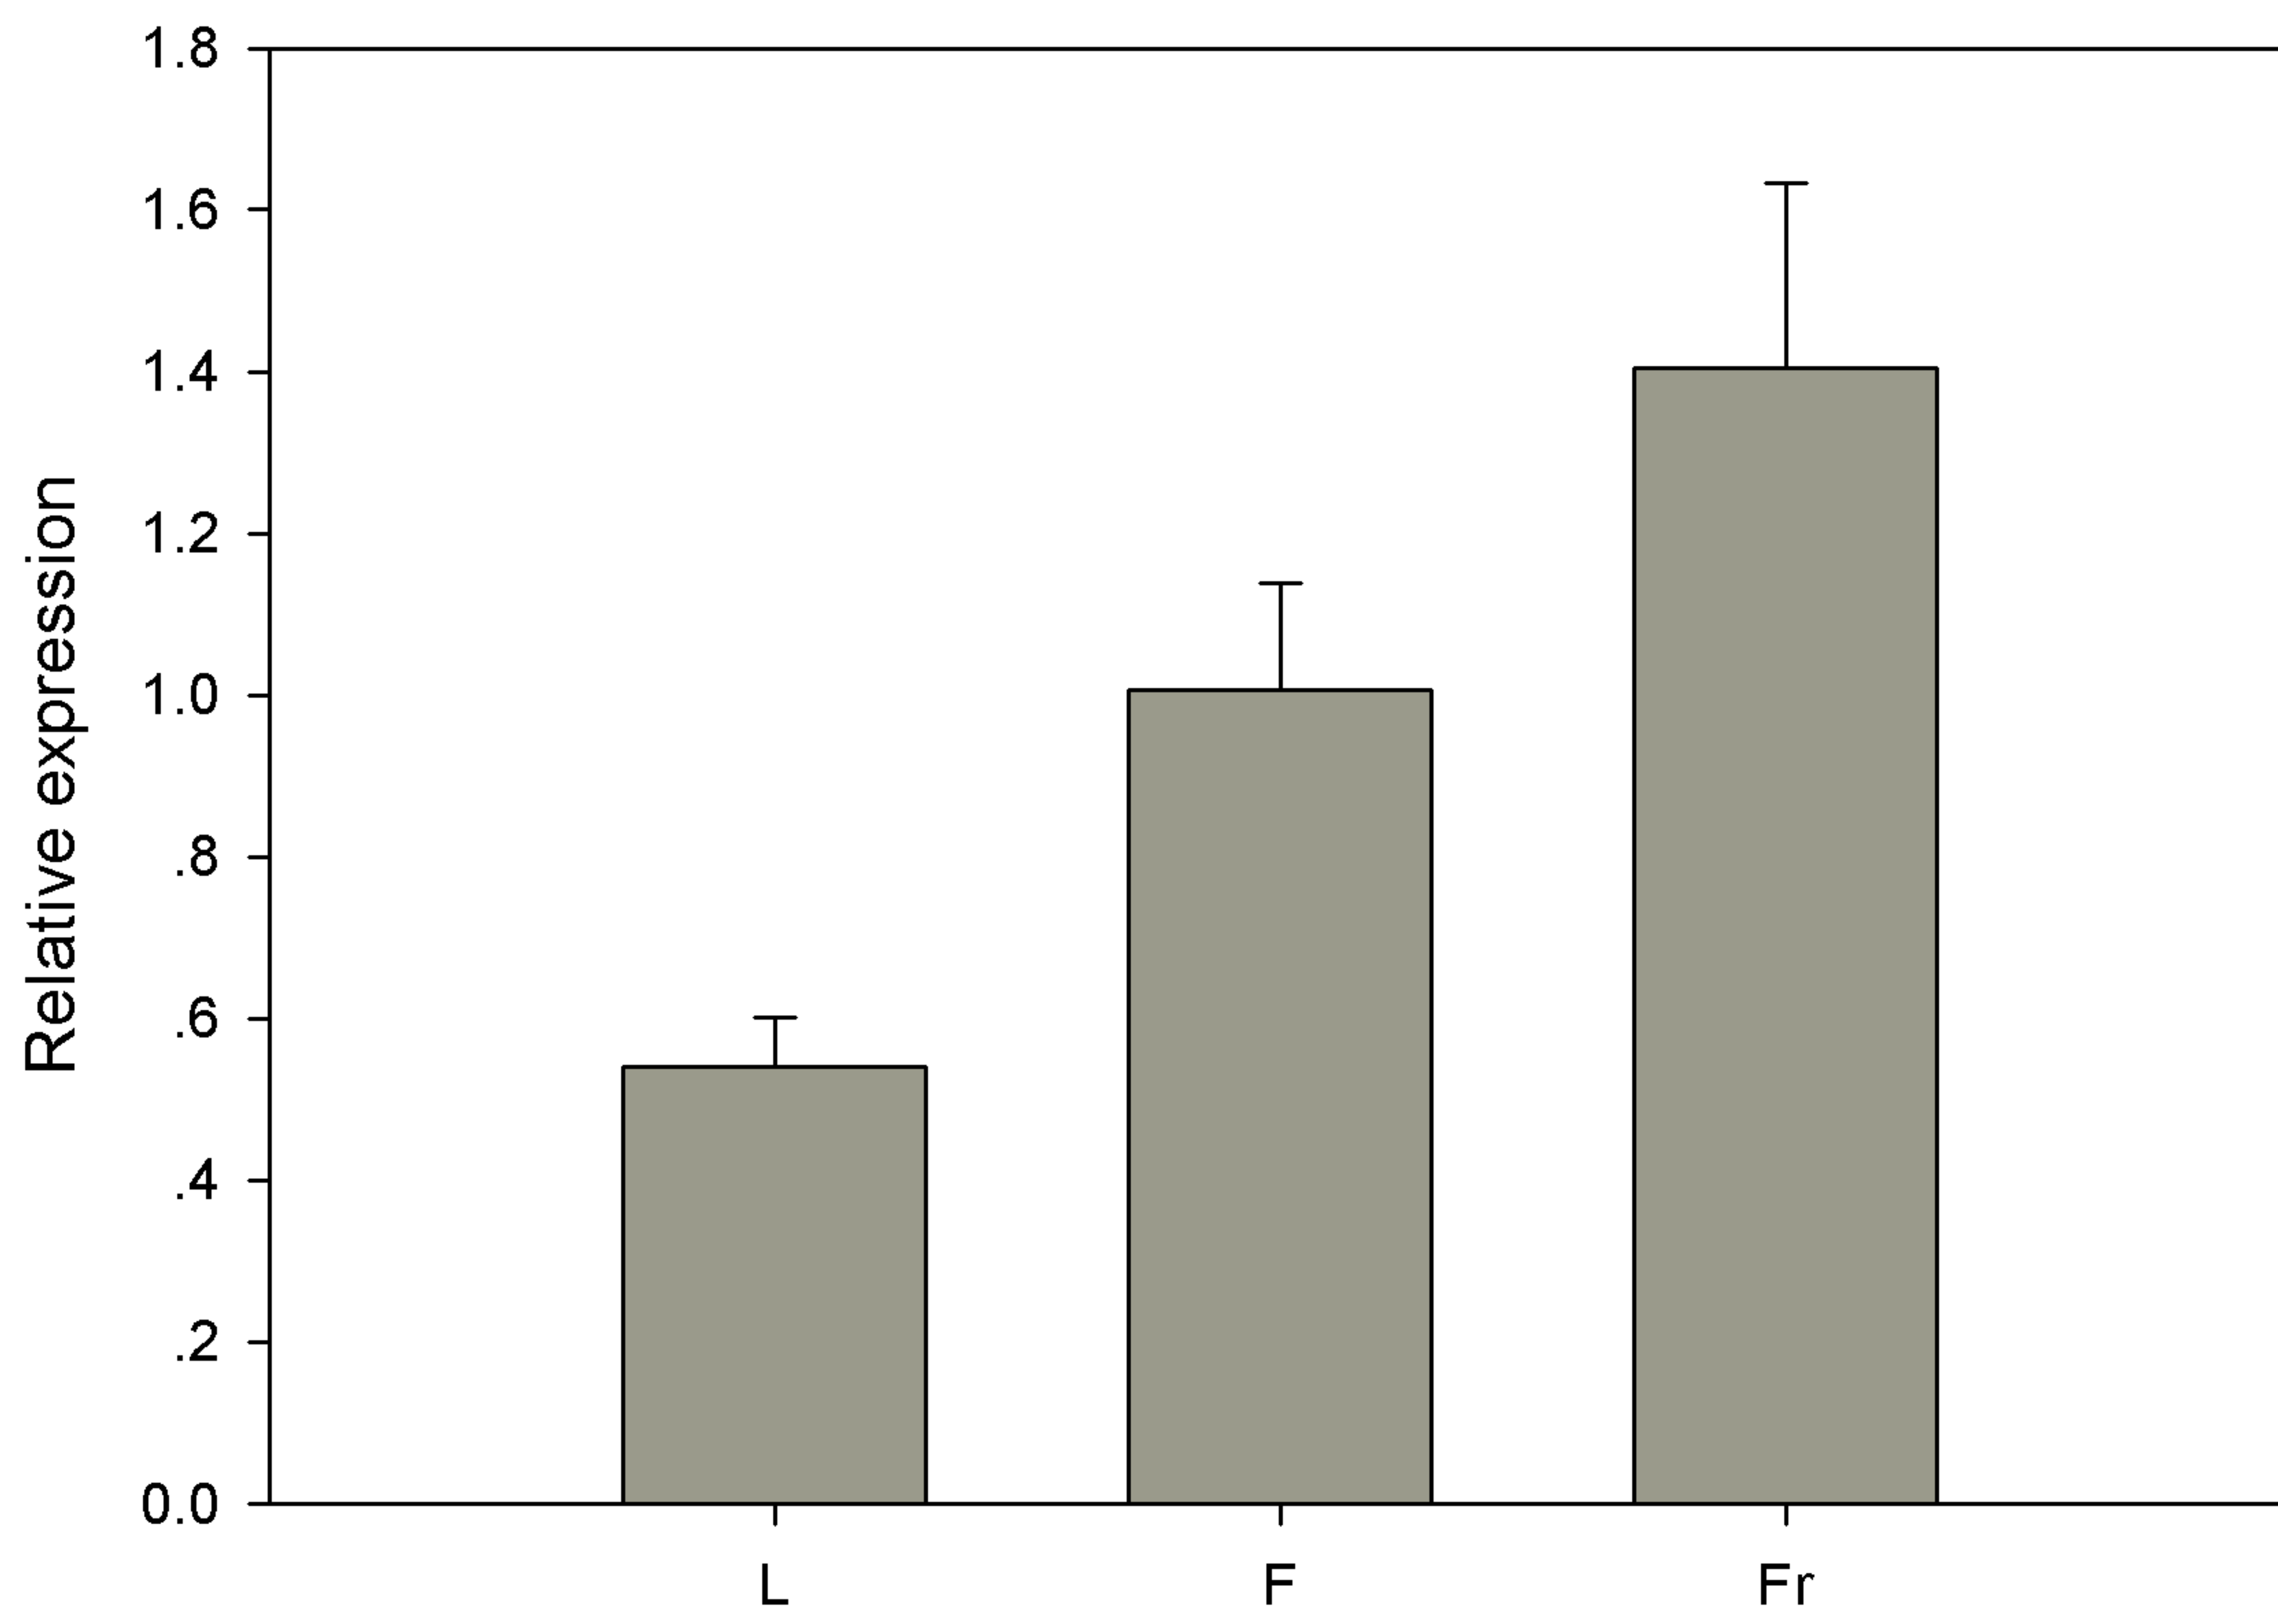

### Csi-miR3952.1

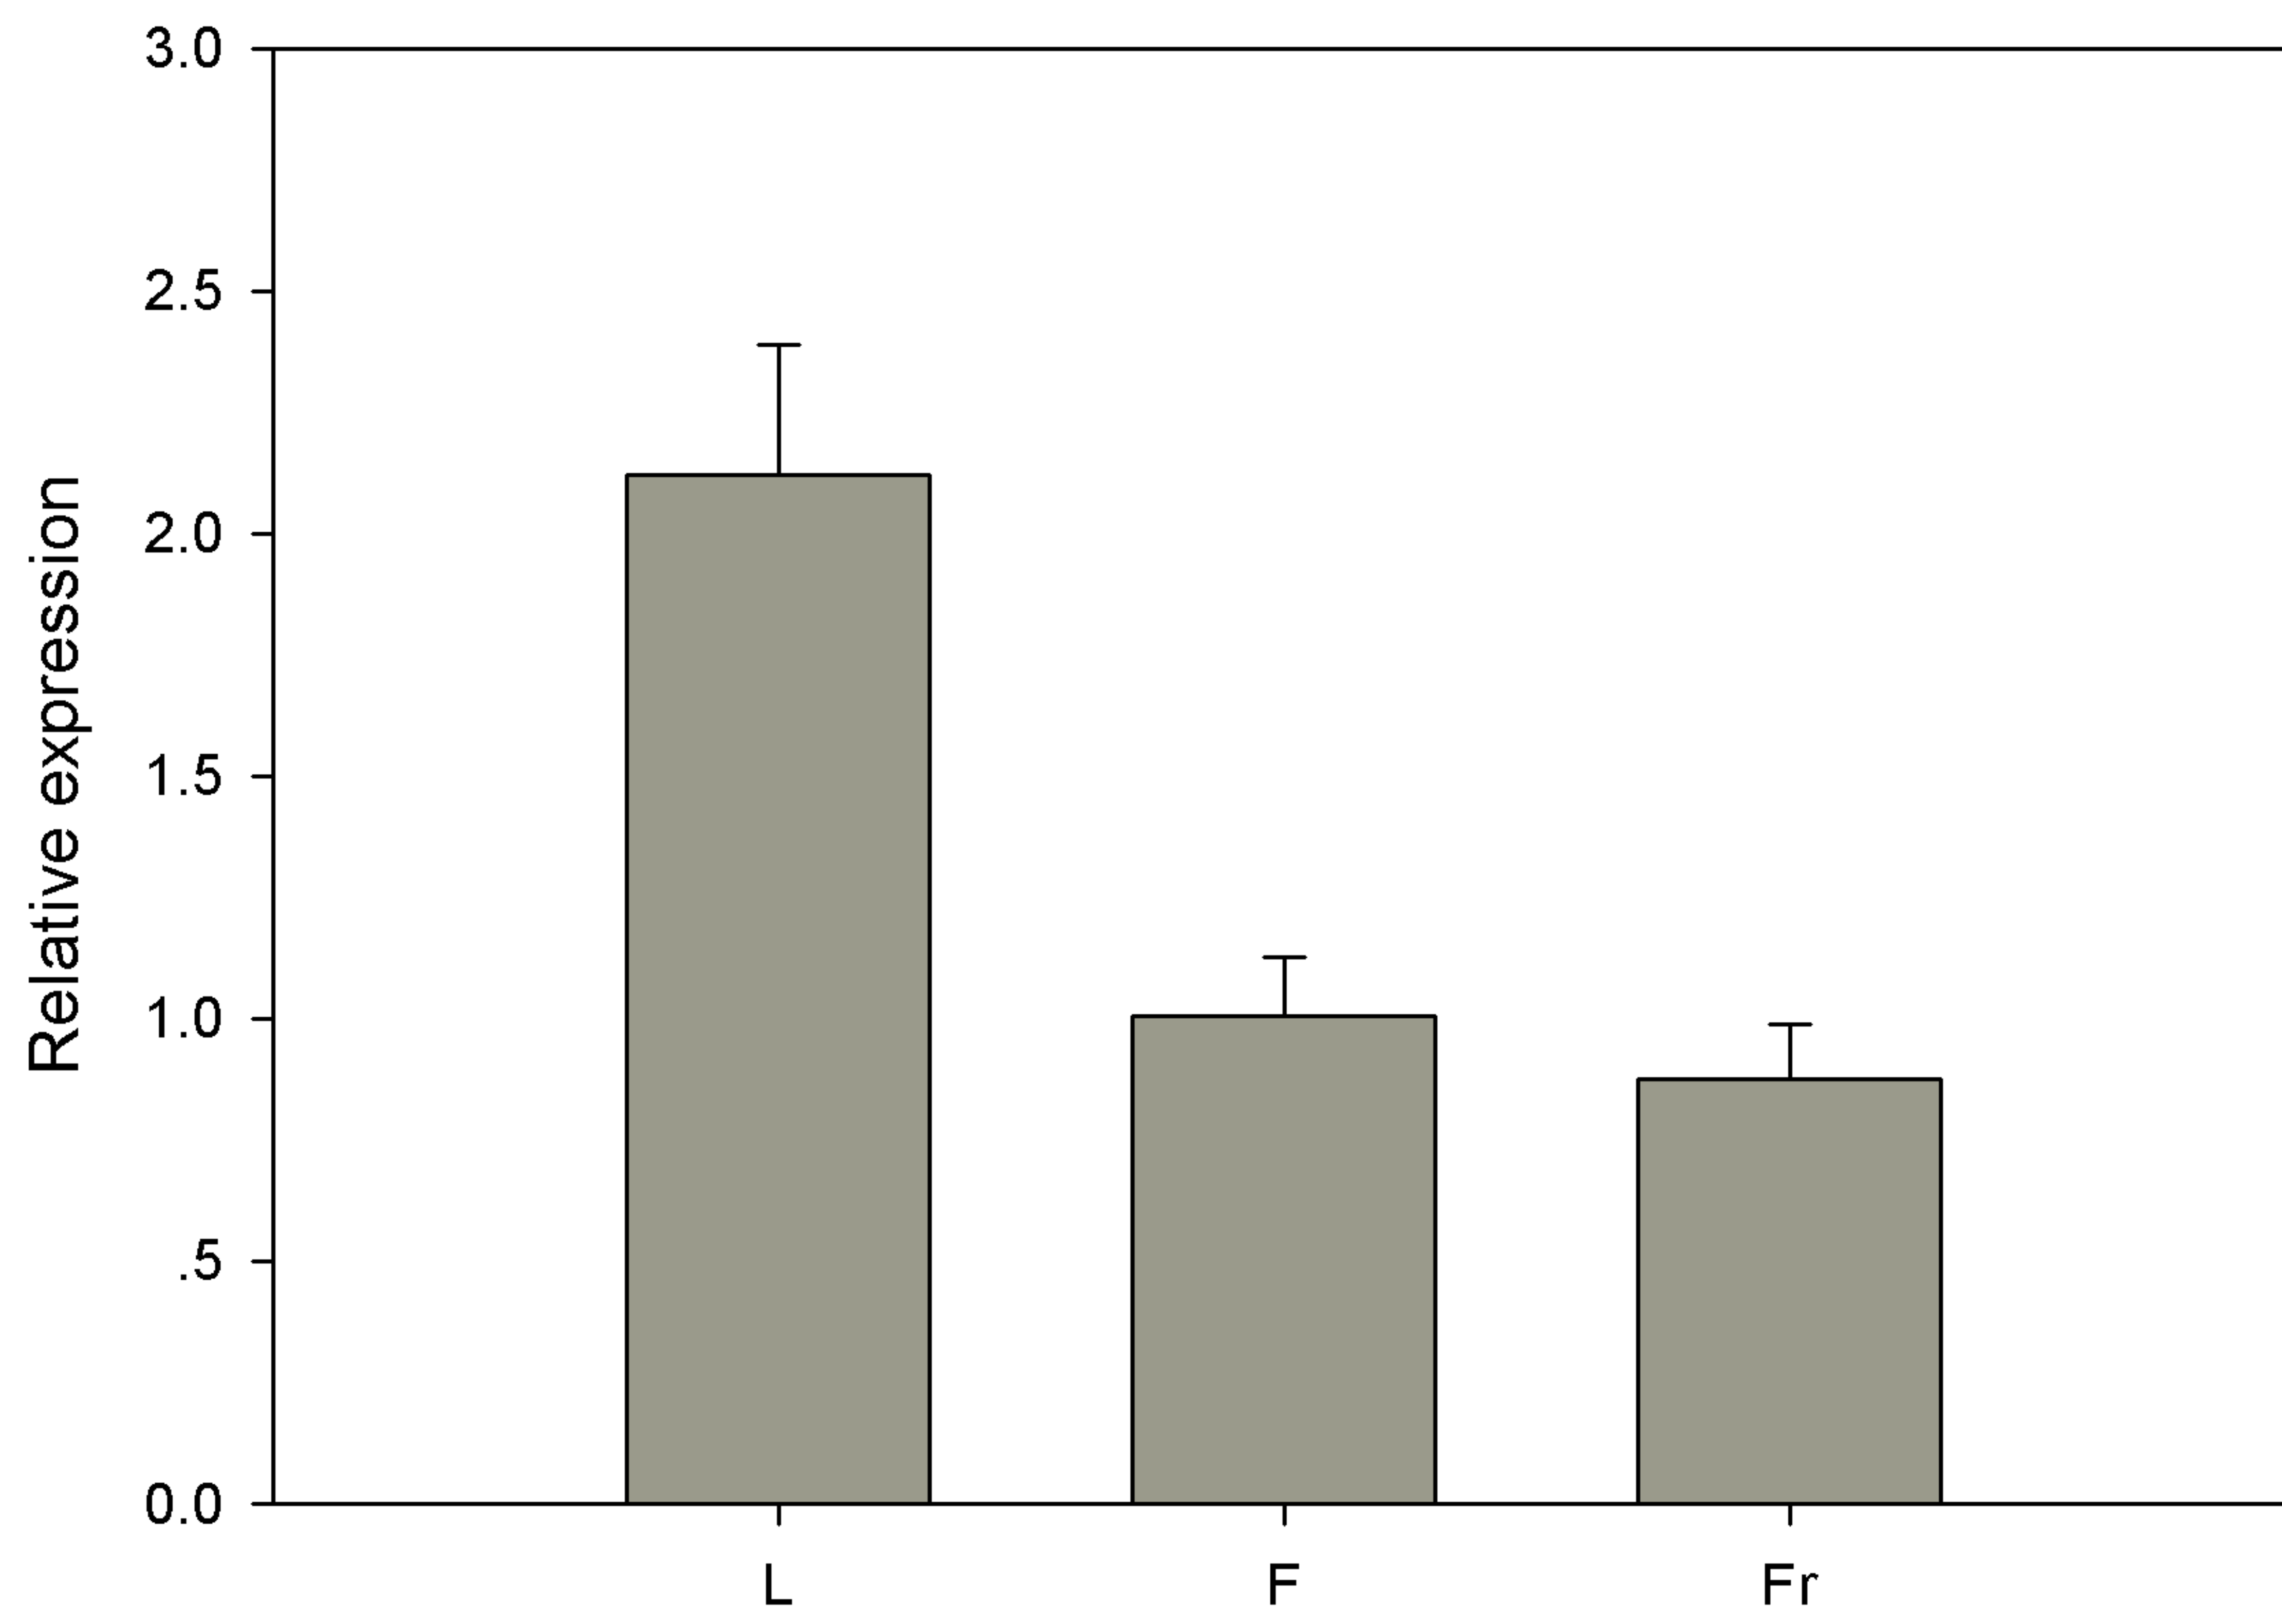

### Csi-miR3952-3p

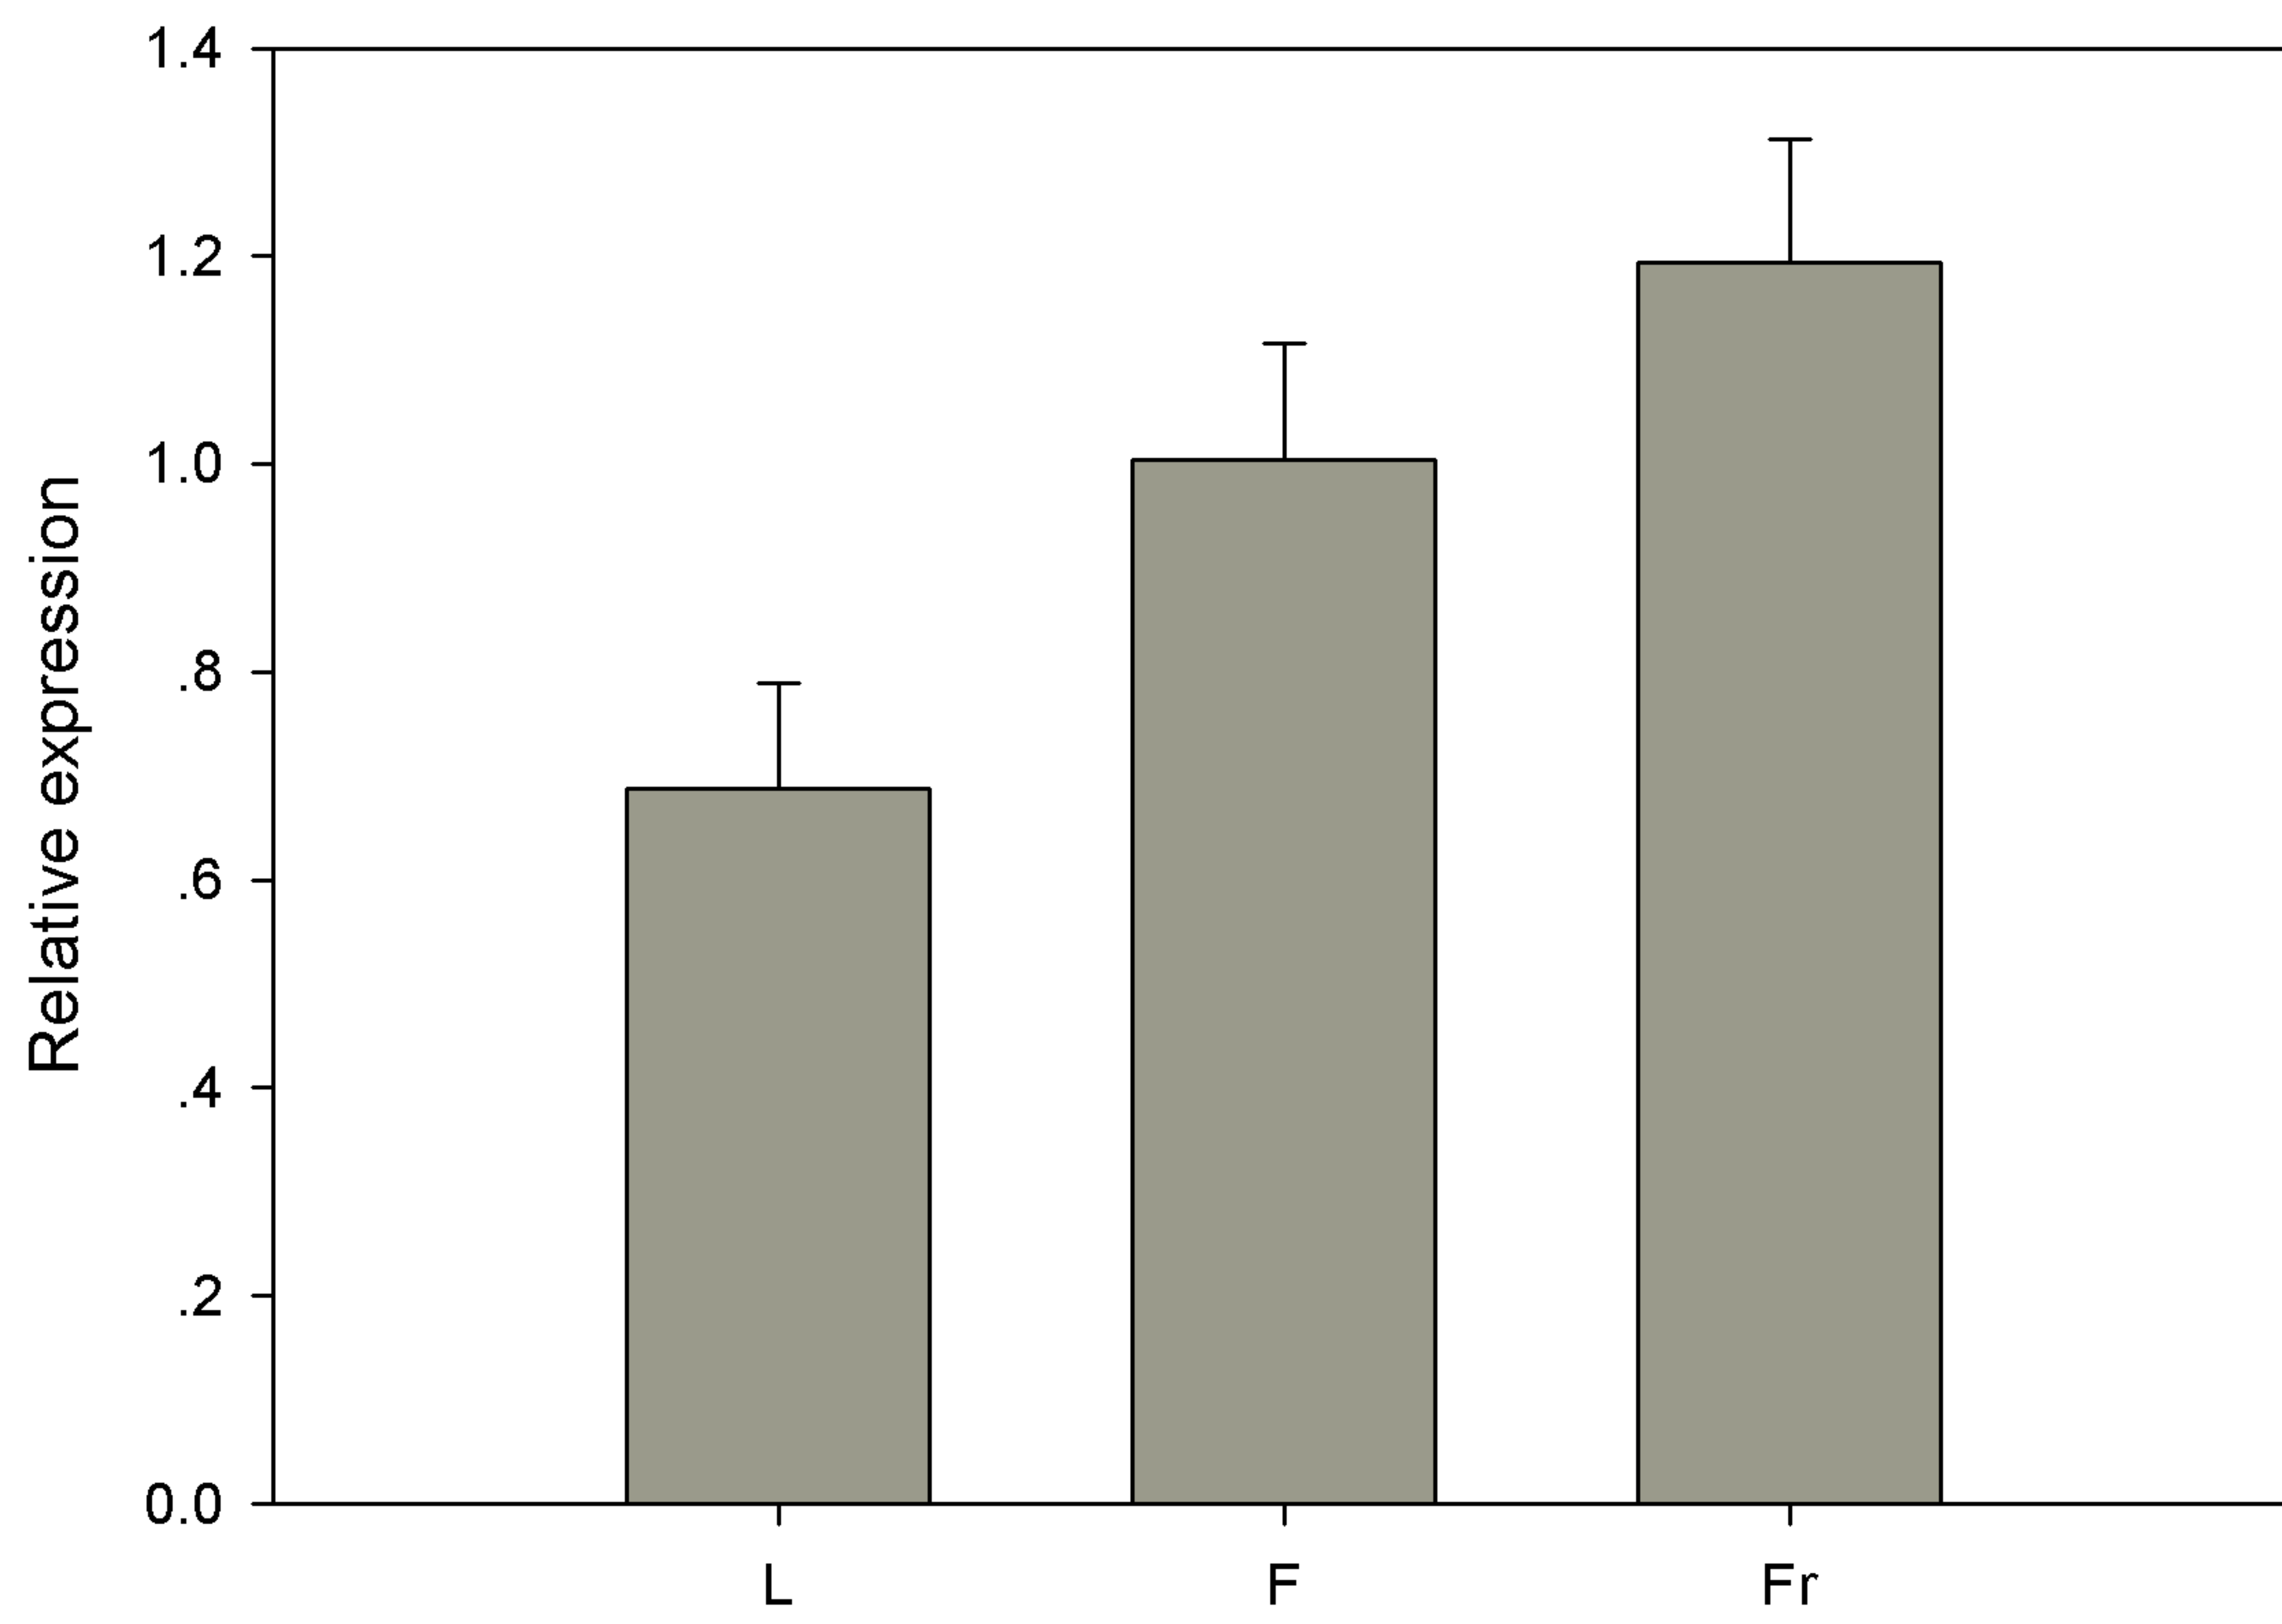

### Csi-miR3954a

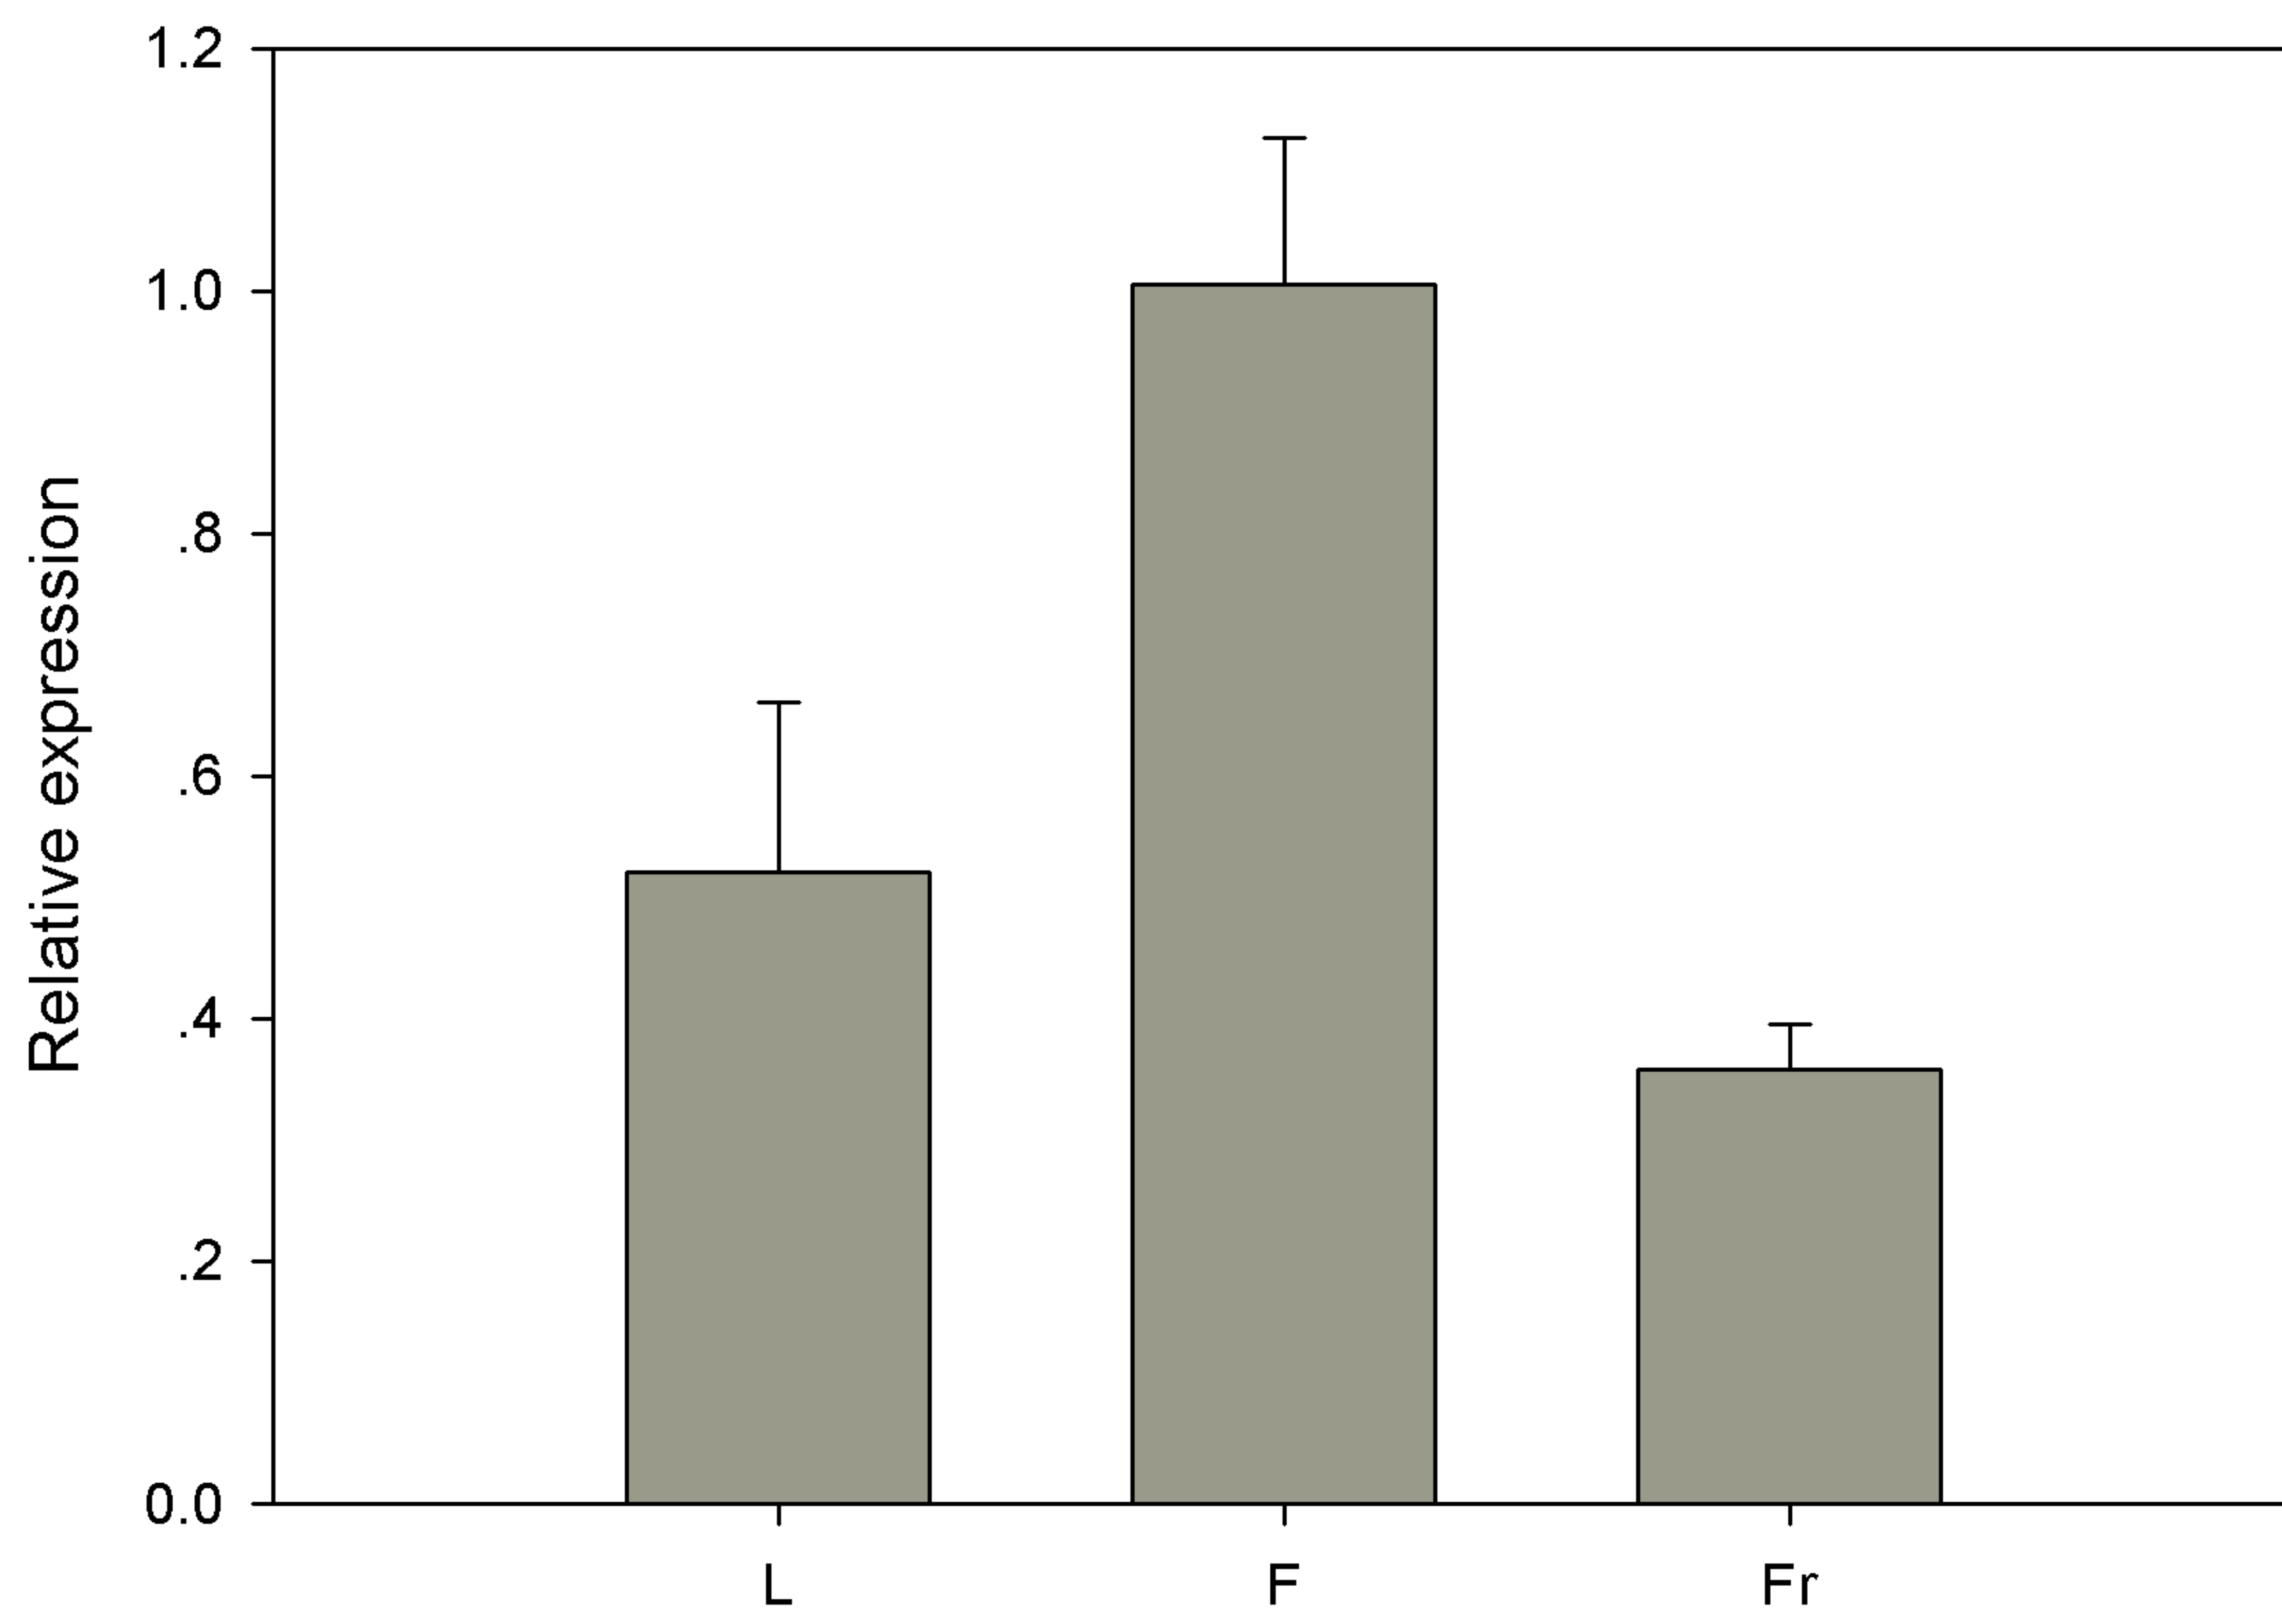



### Csi-miR396b.2

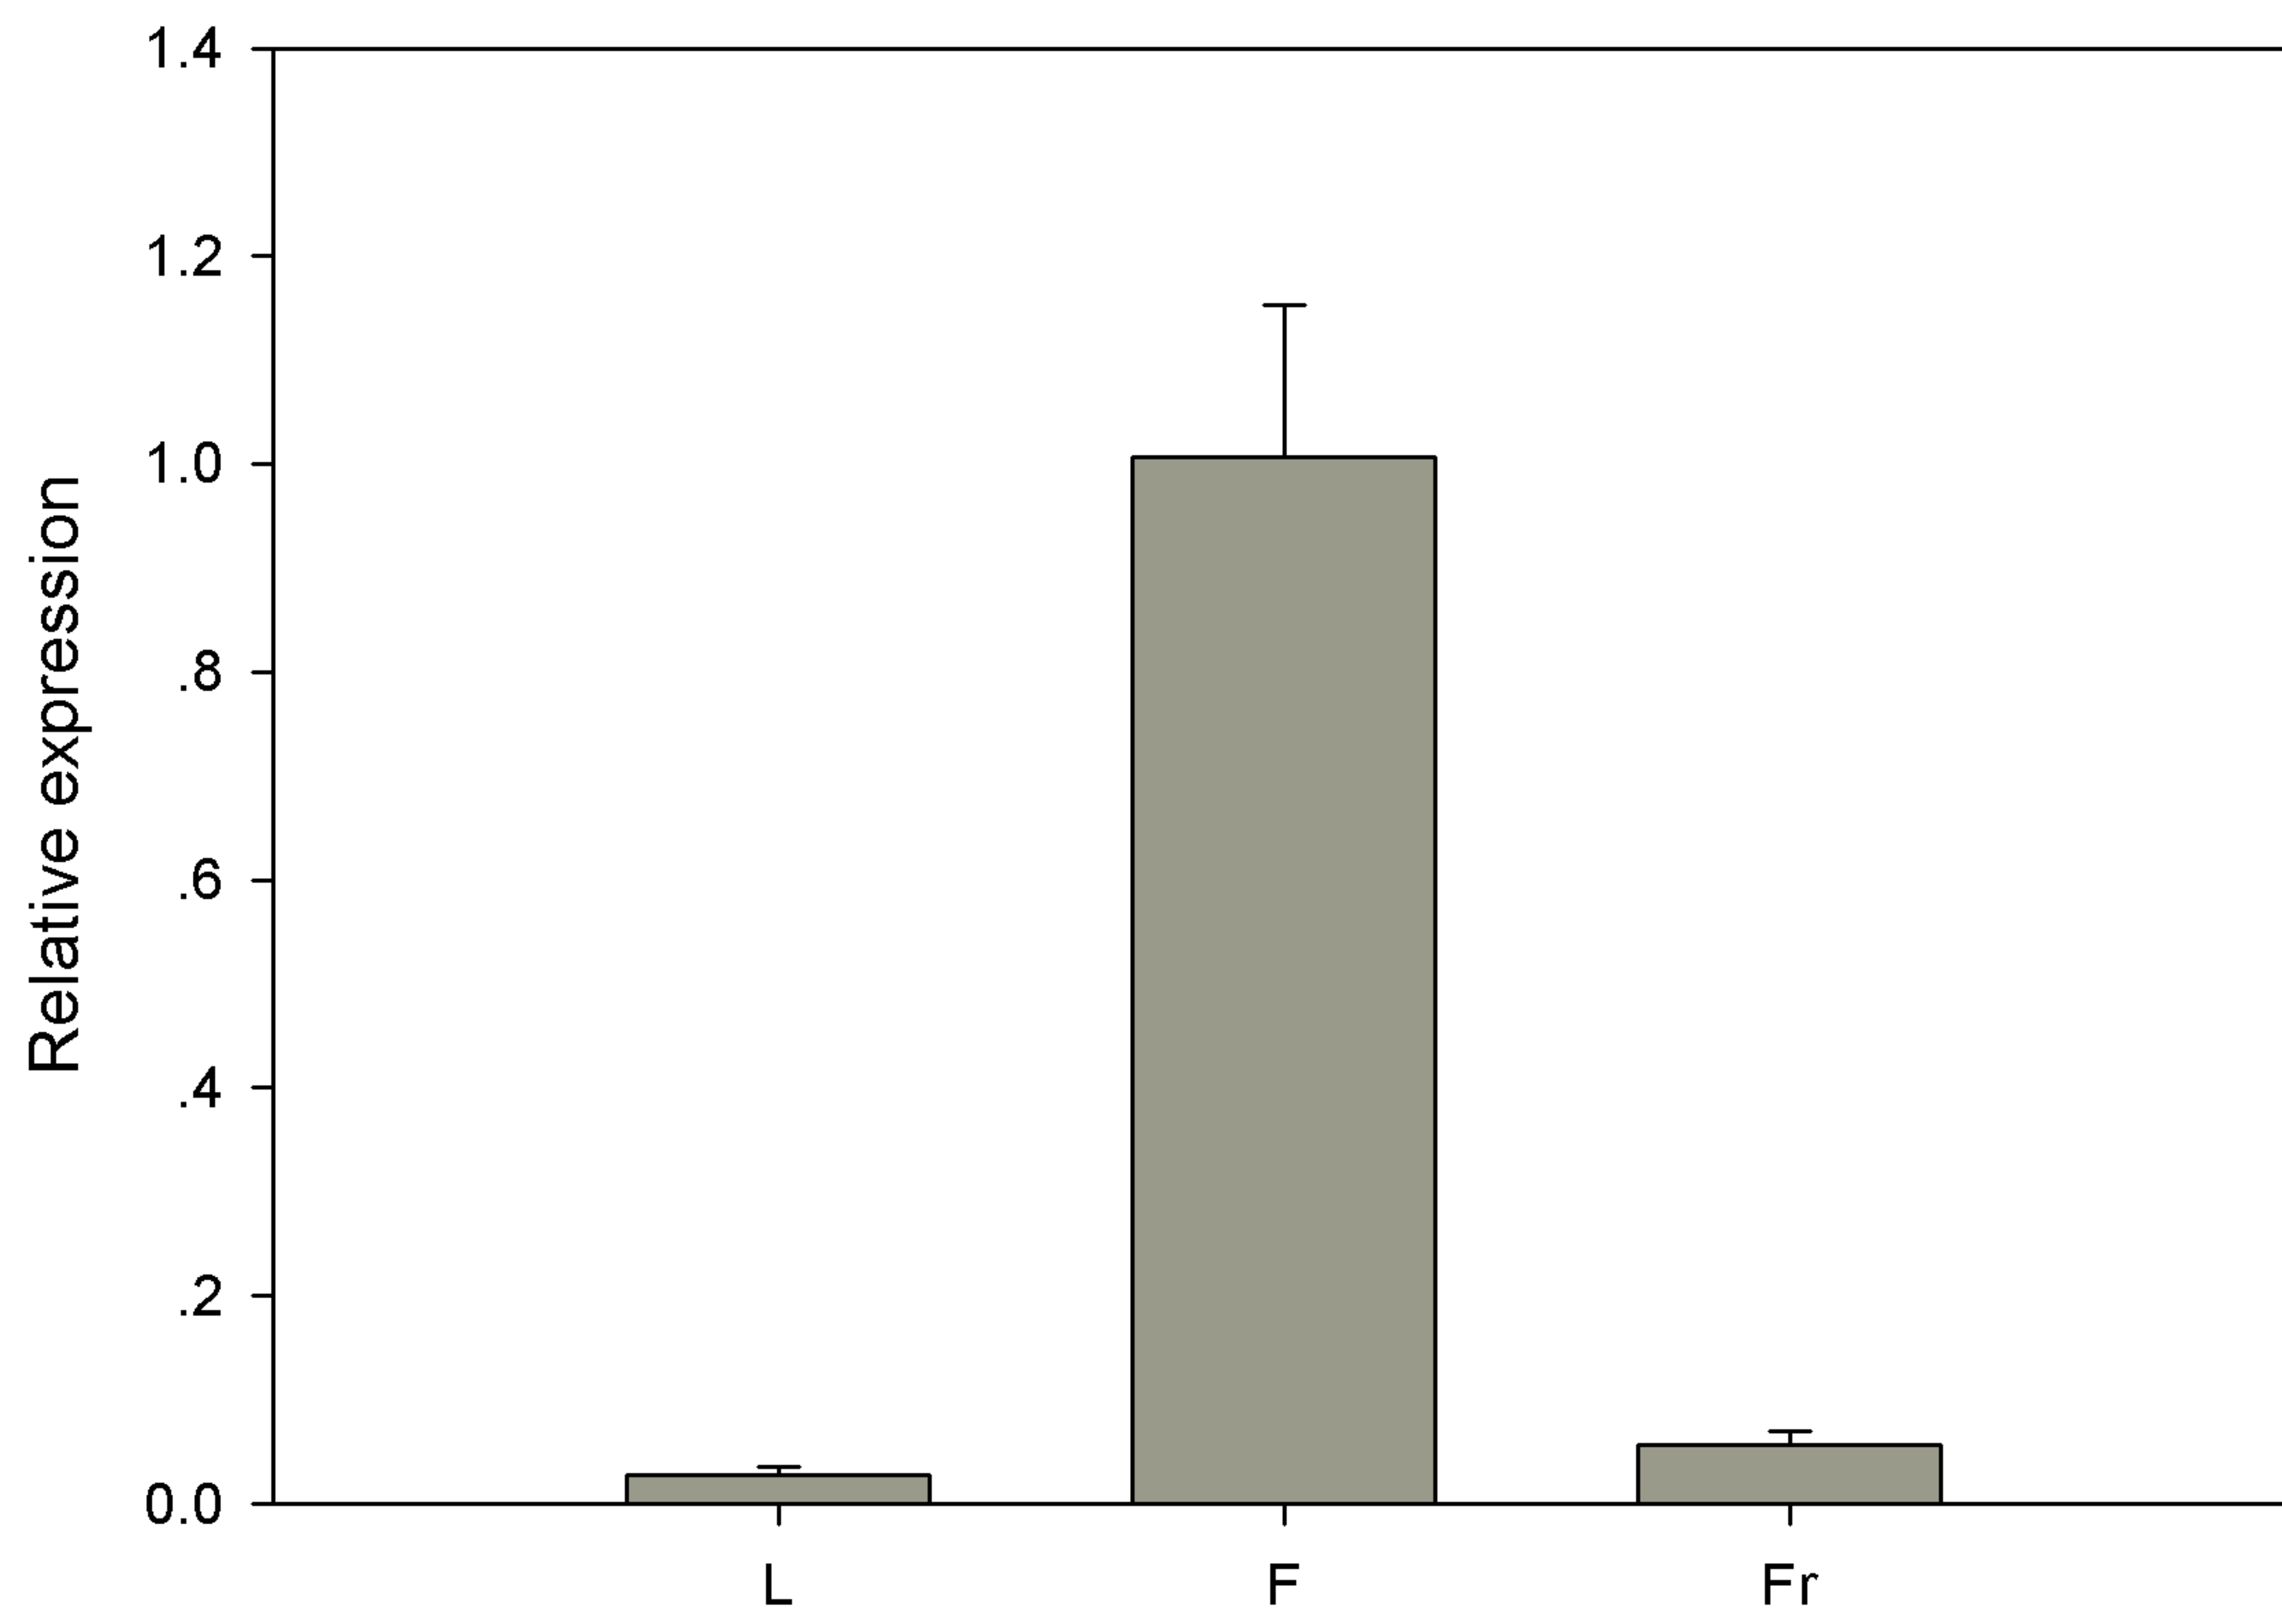

Csi-miR396b-3p.1

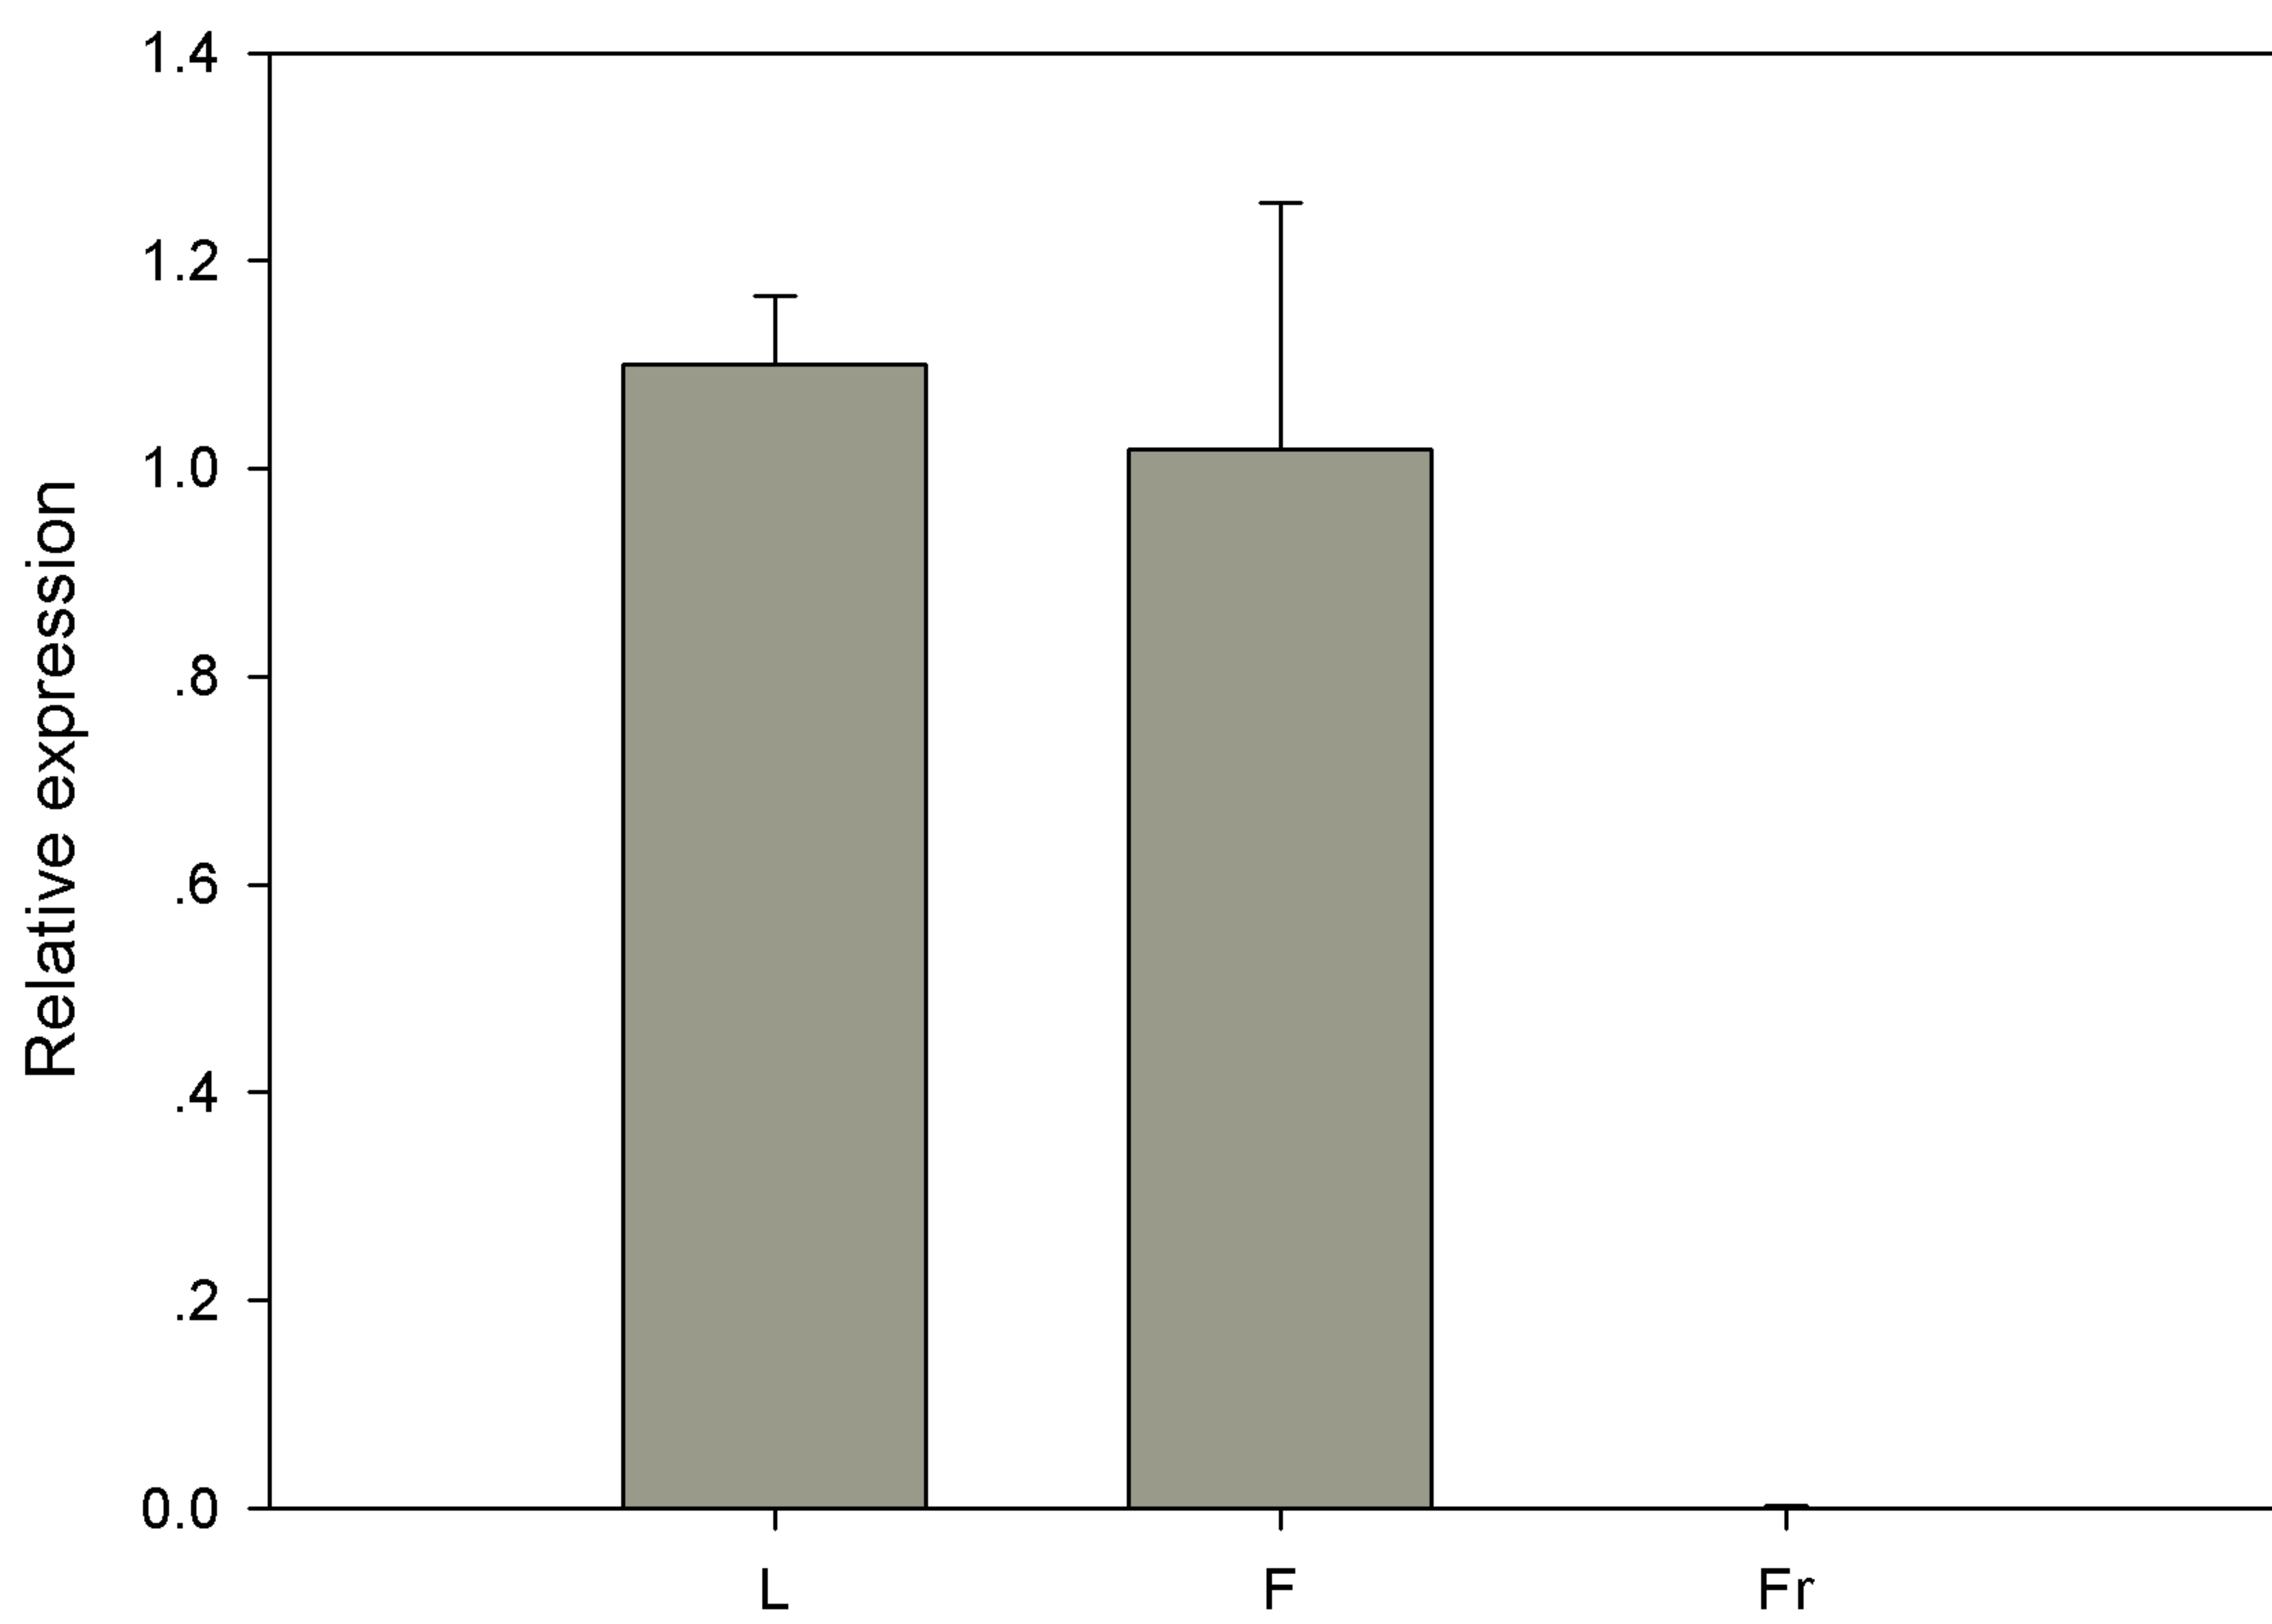

### Csi-miR396d.4

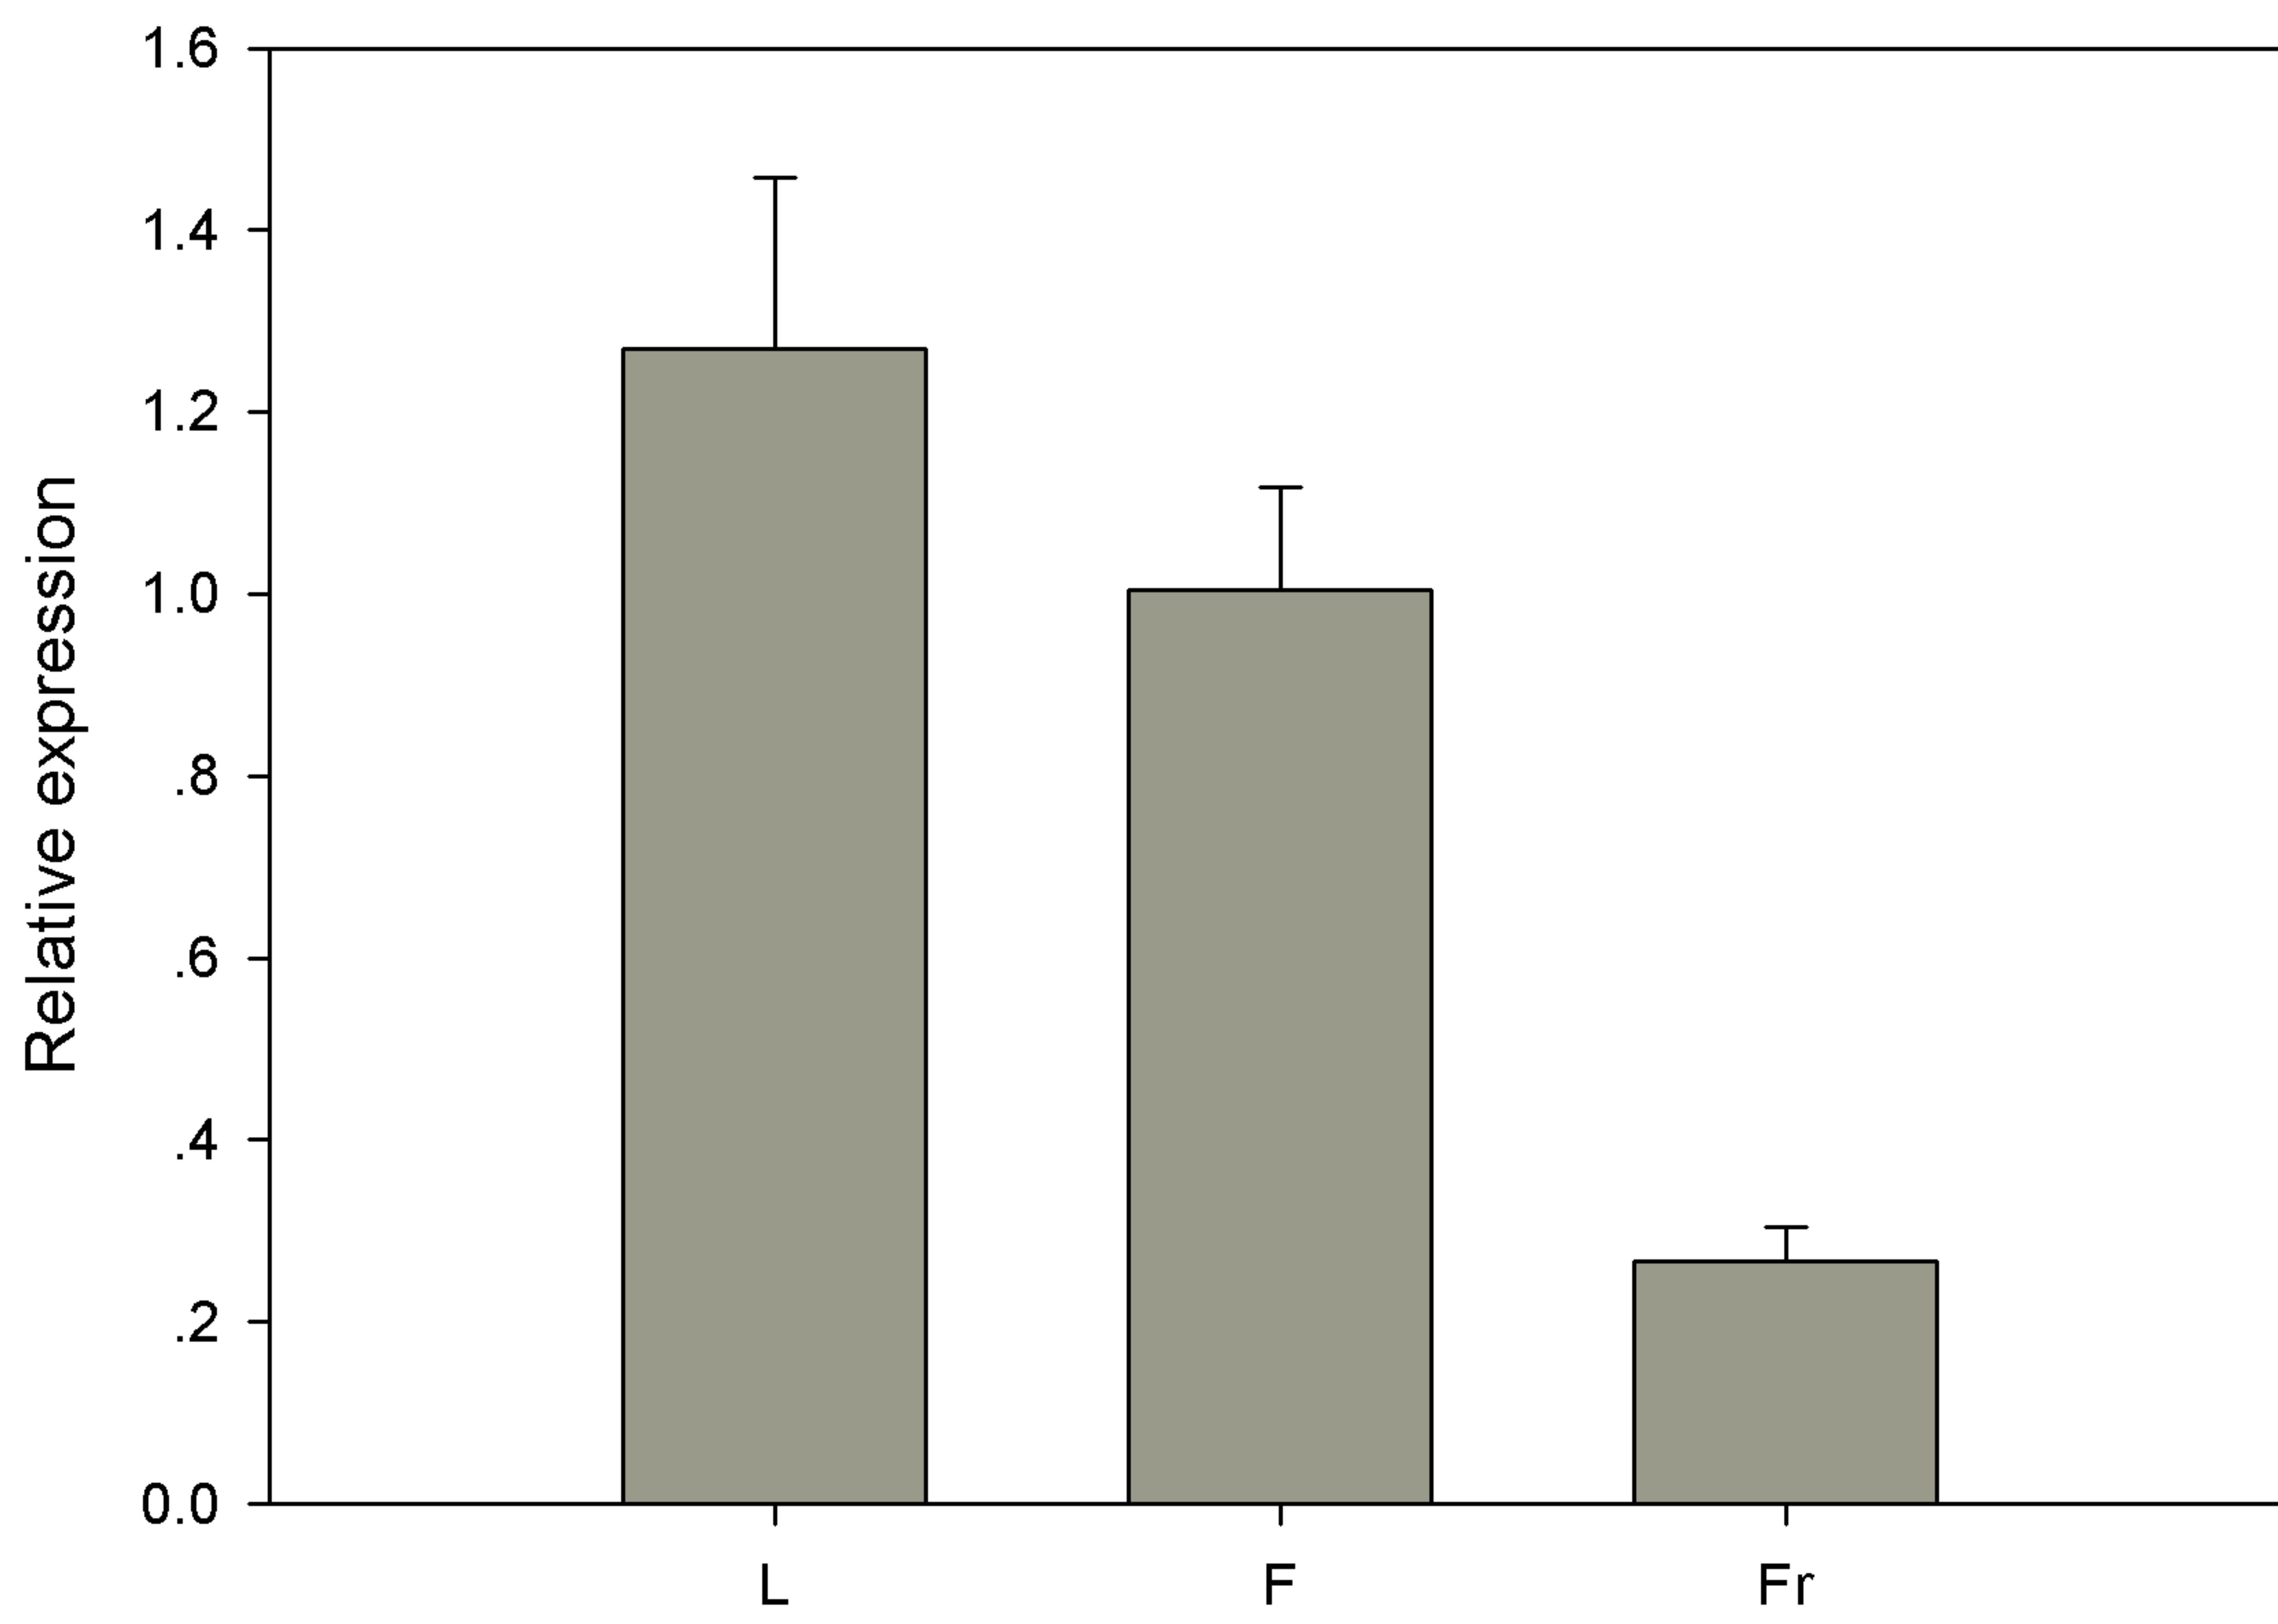

### Csi-miR397.1

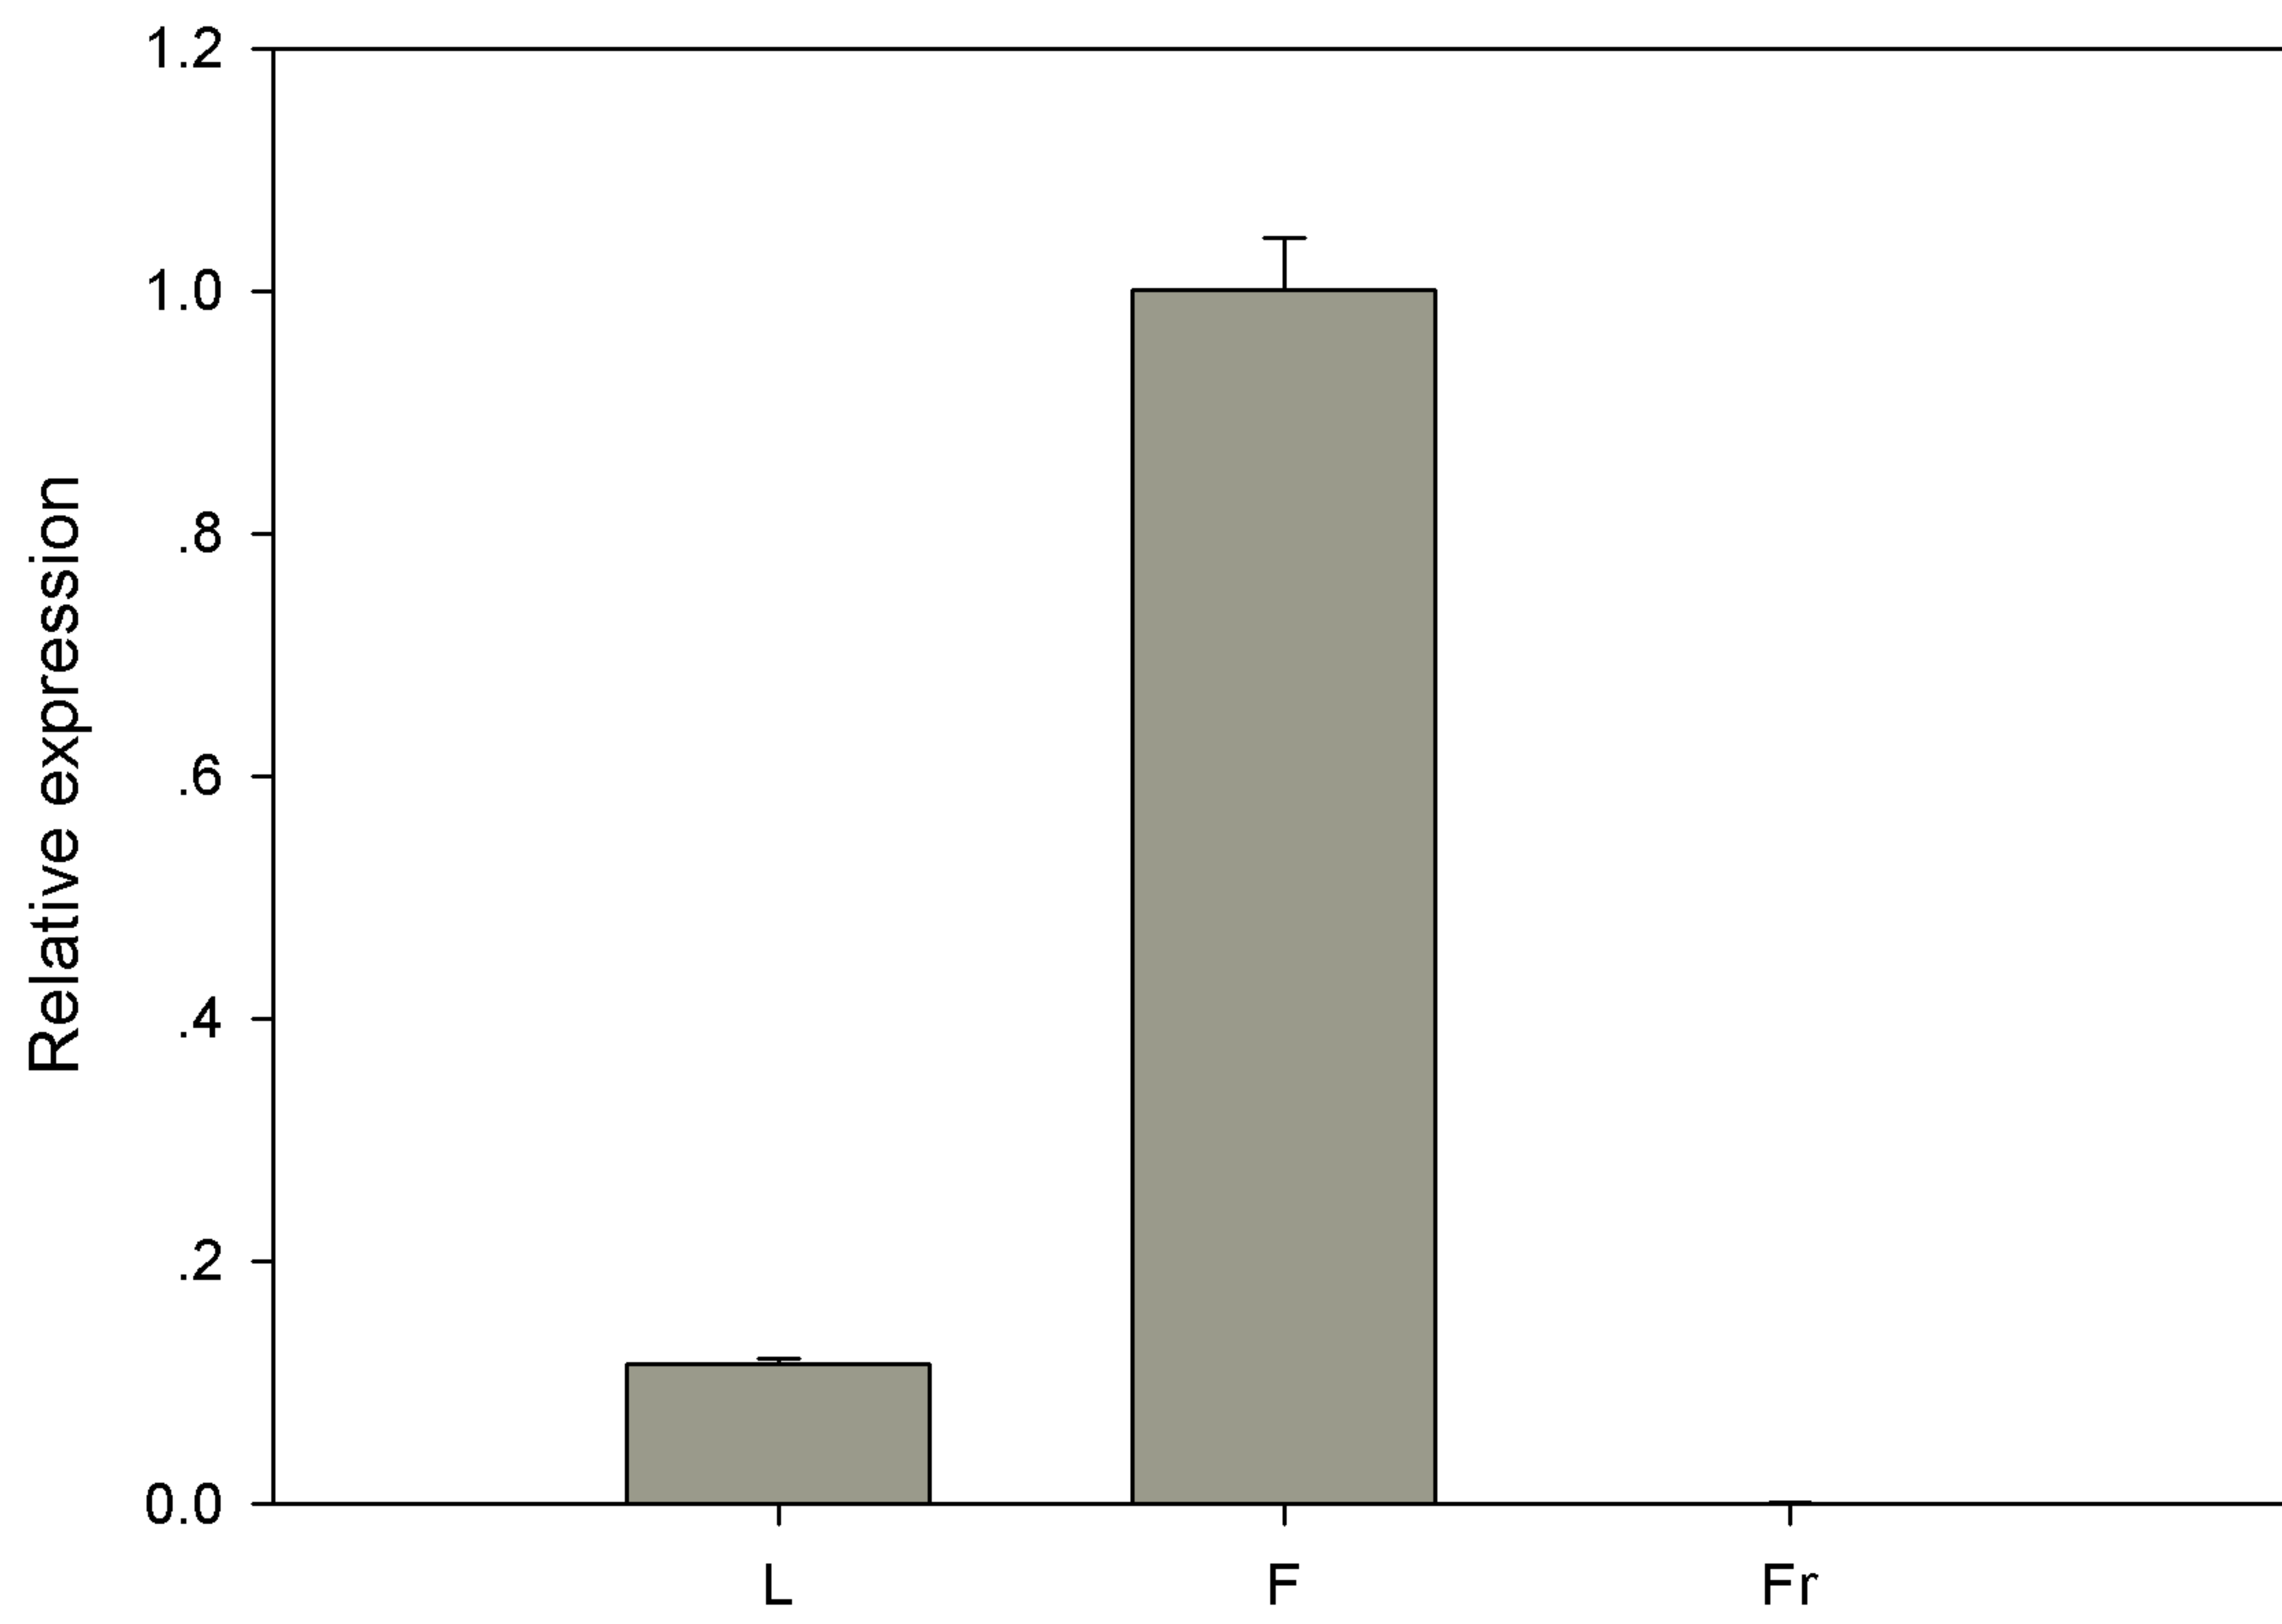

### Csi-miR398b

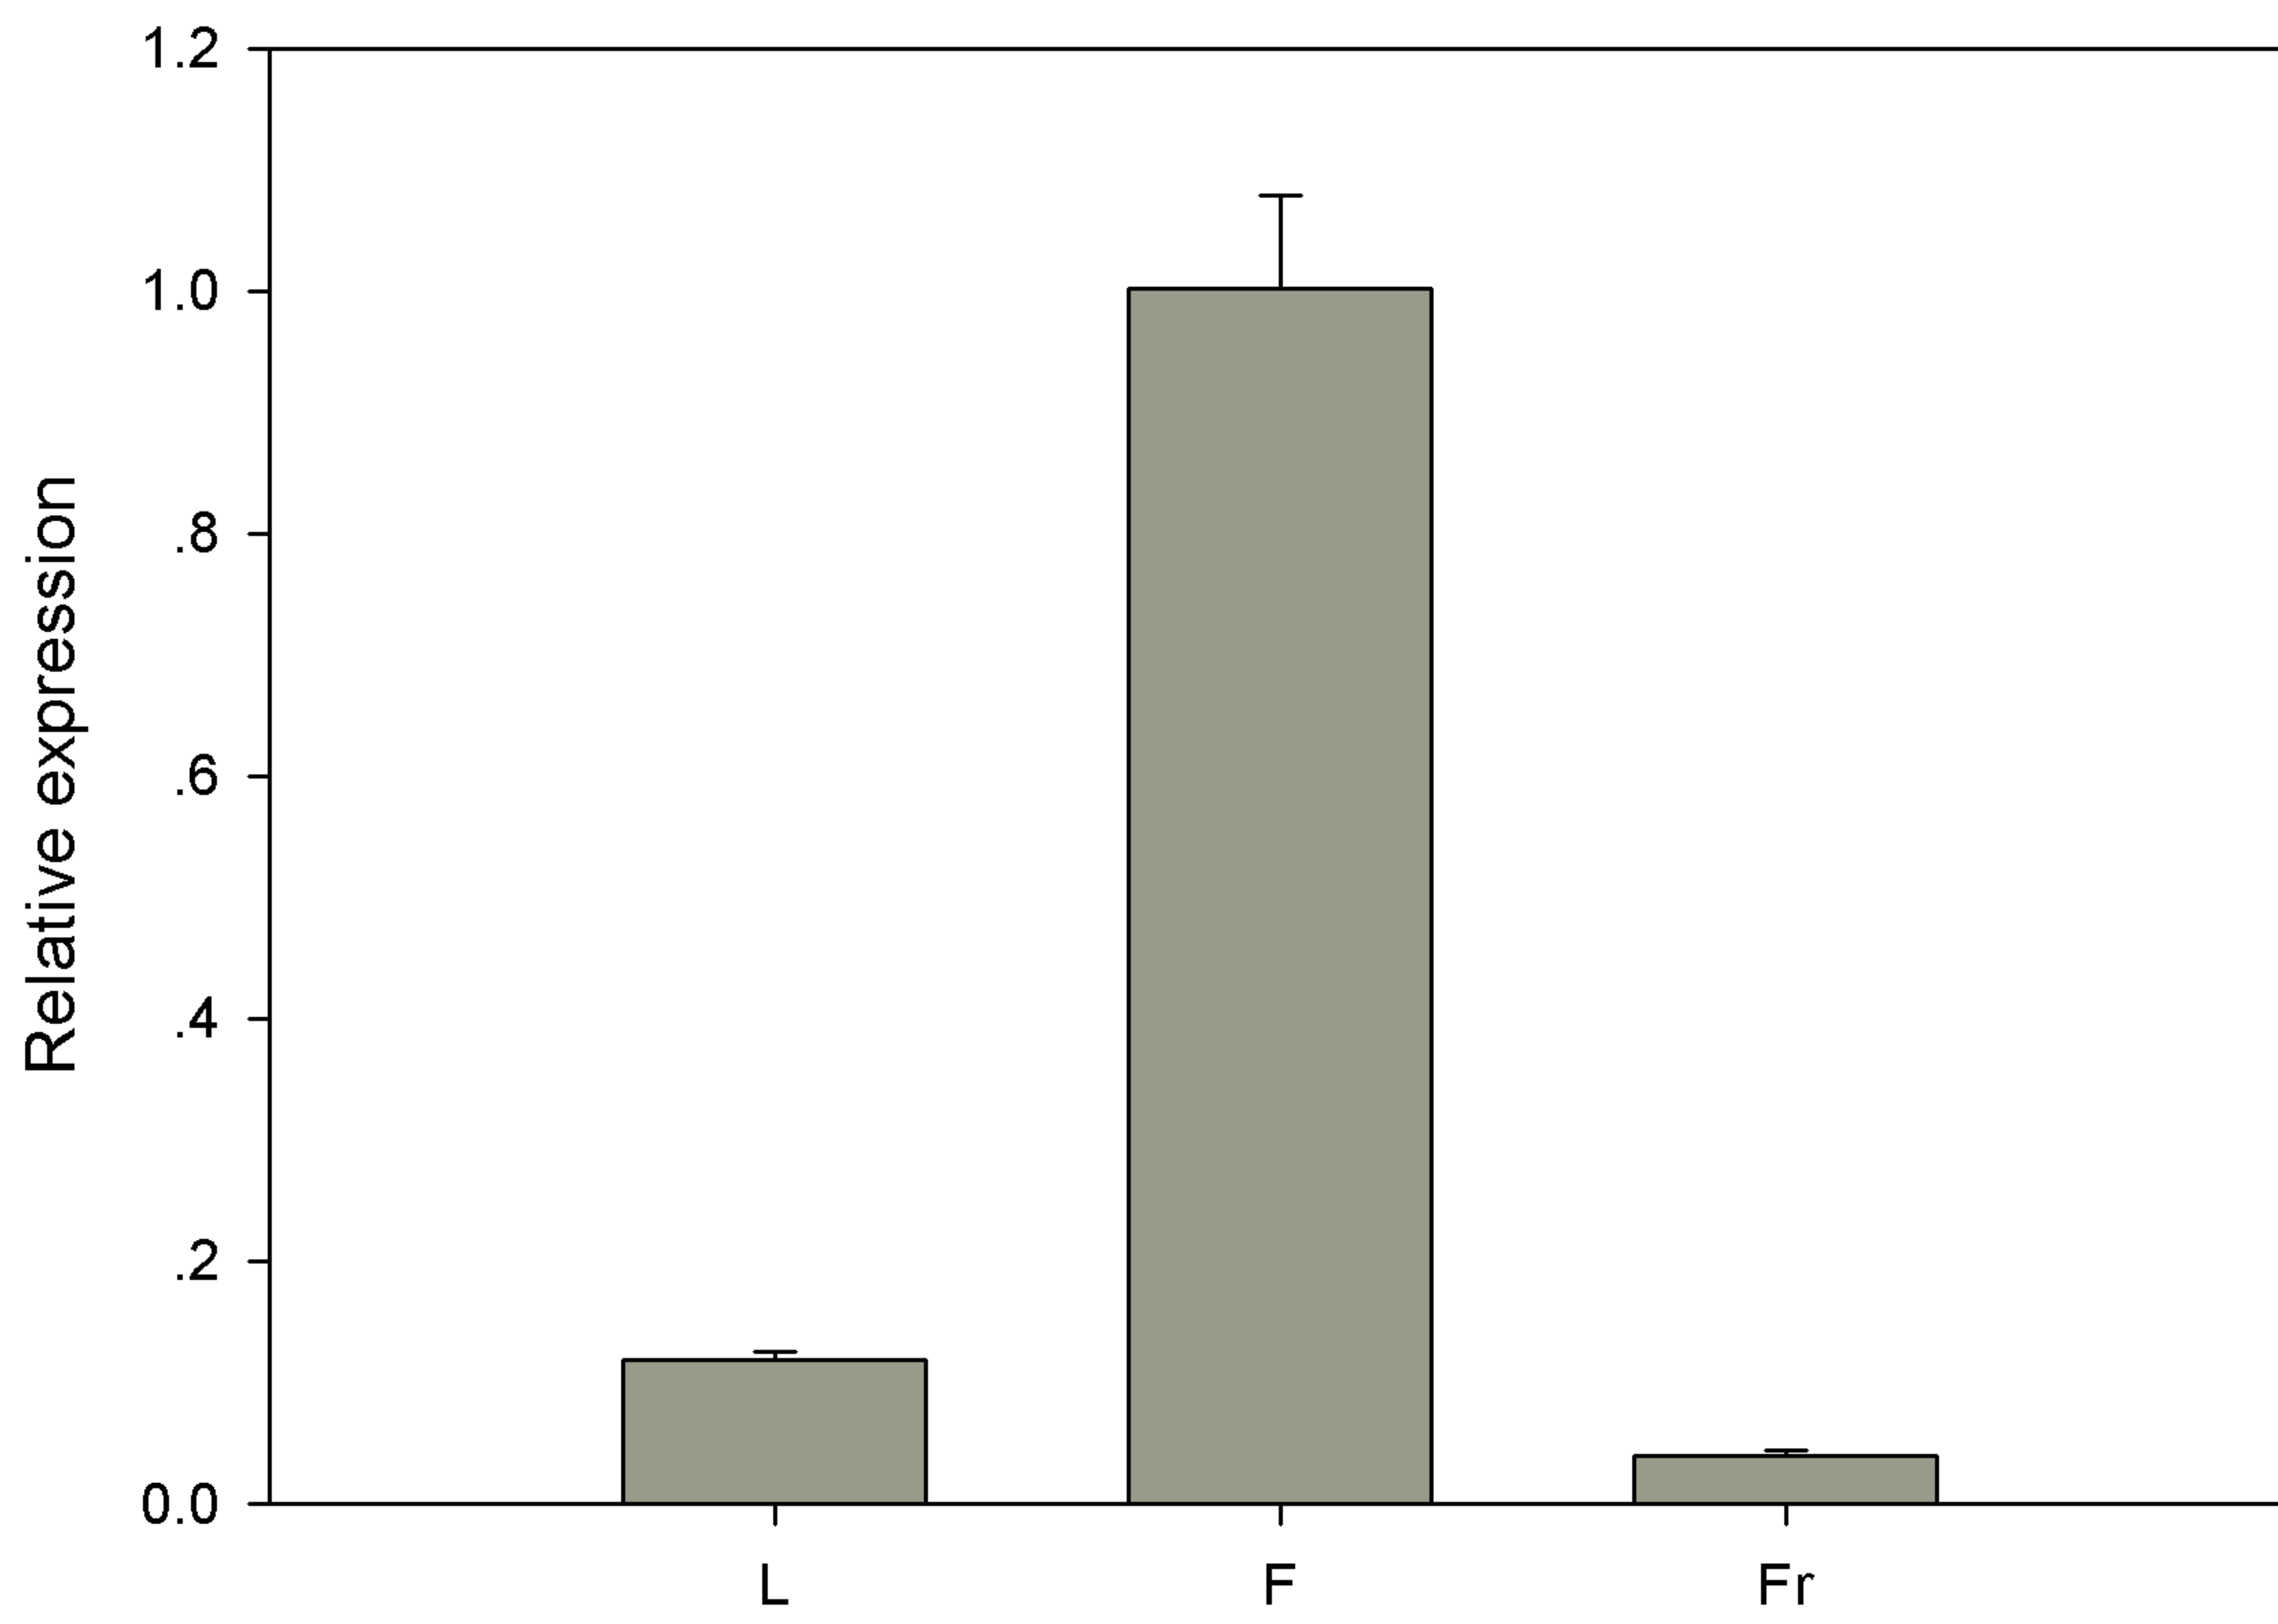

### Csi-miR399a

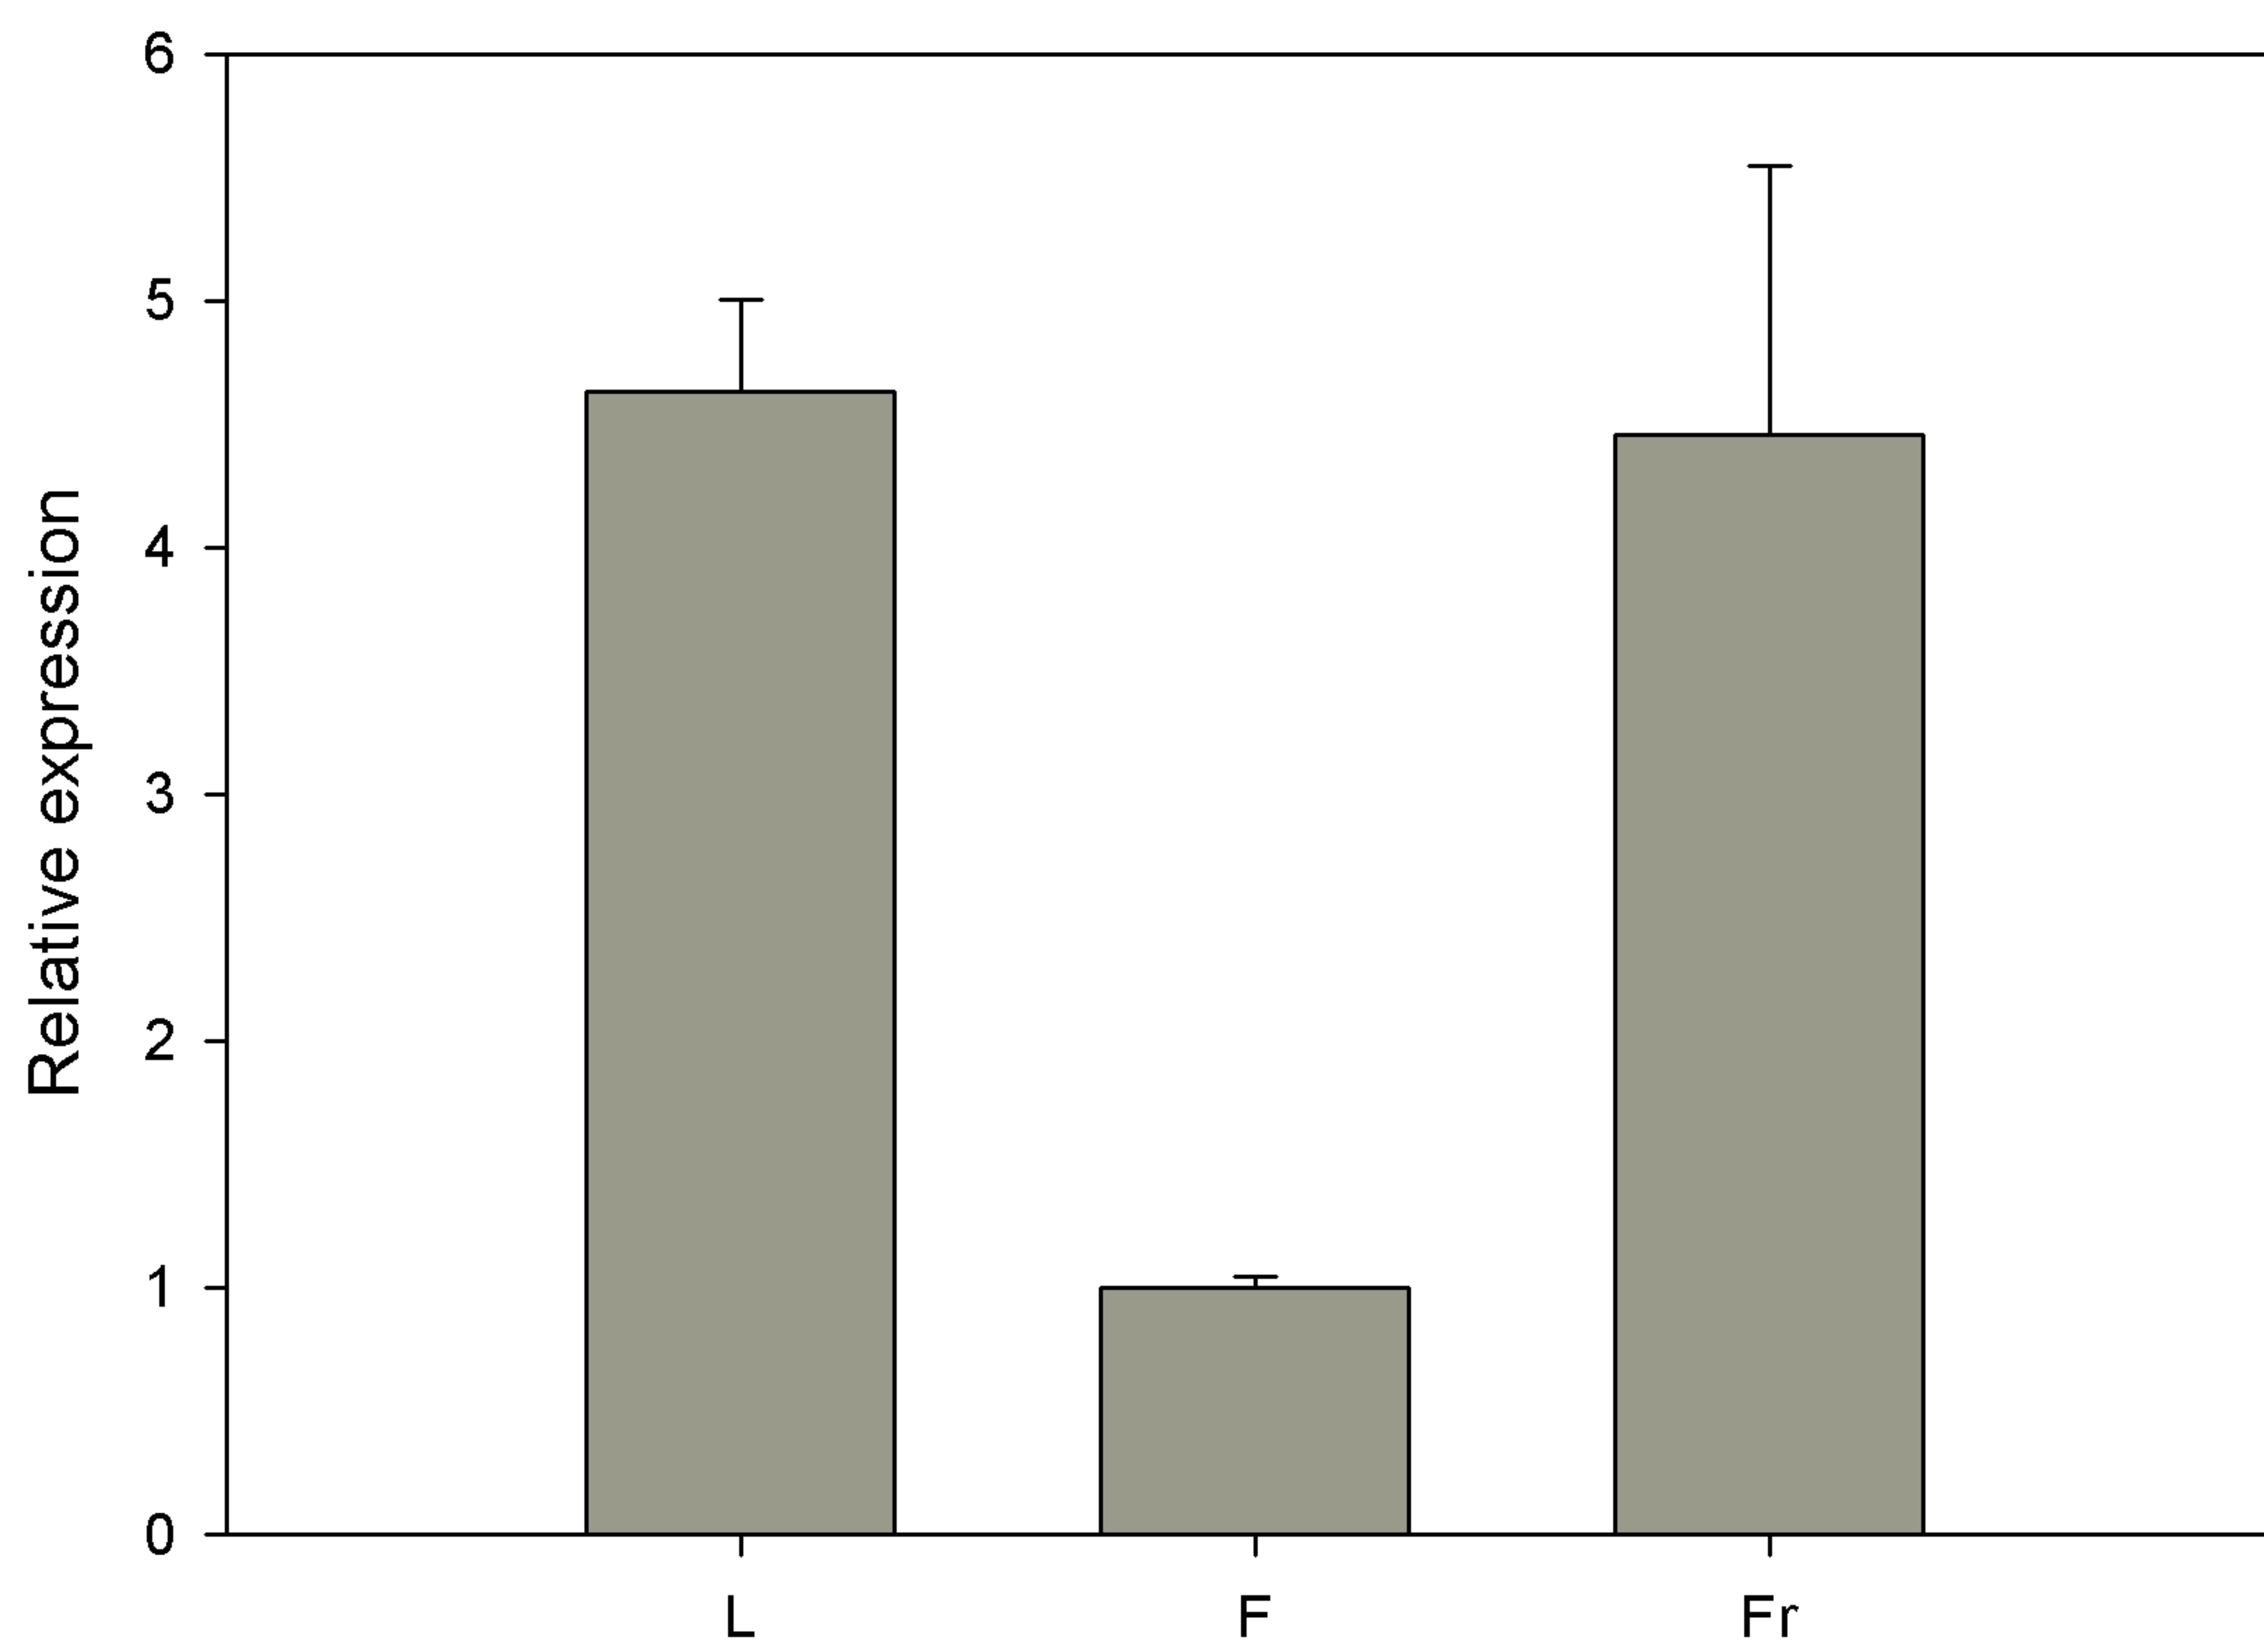

### Csi-miR399b

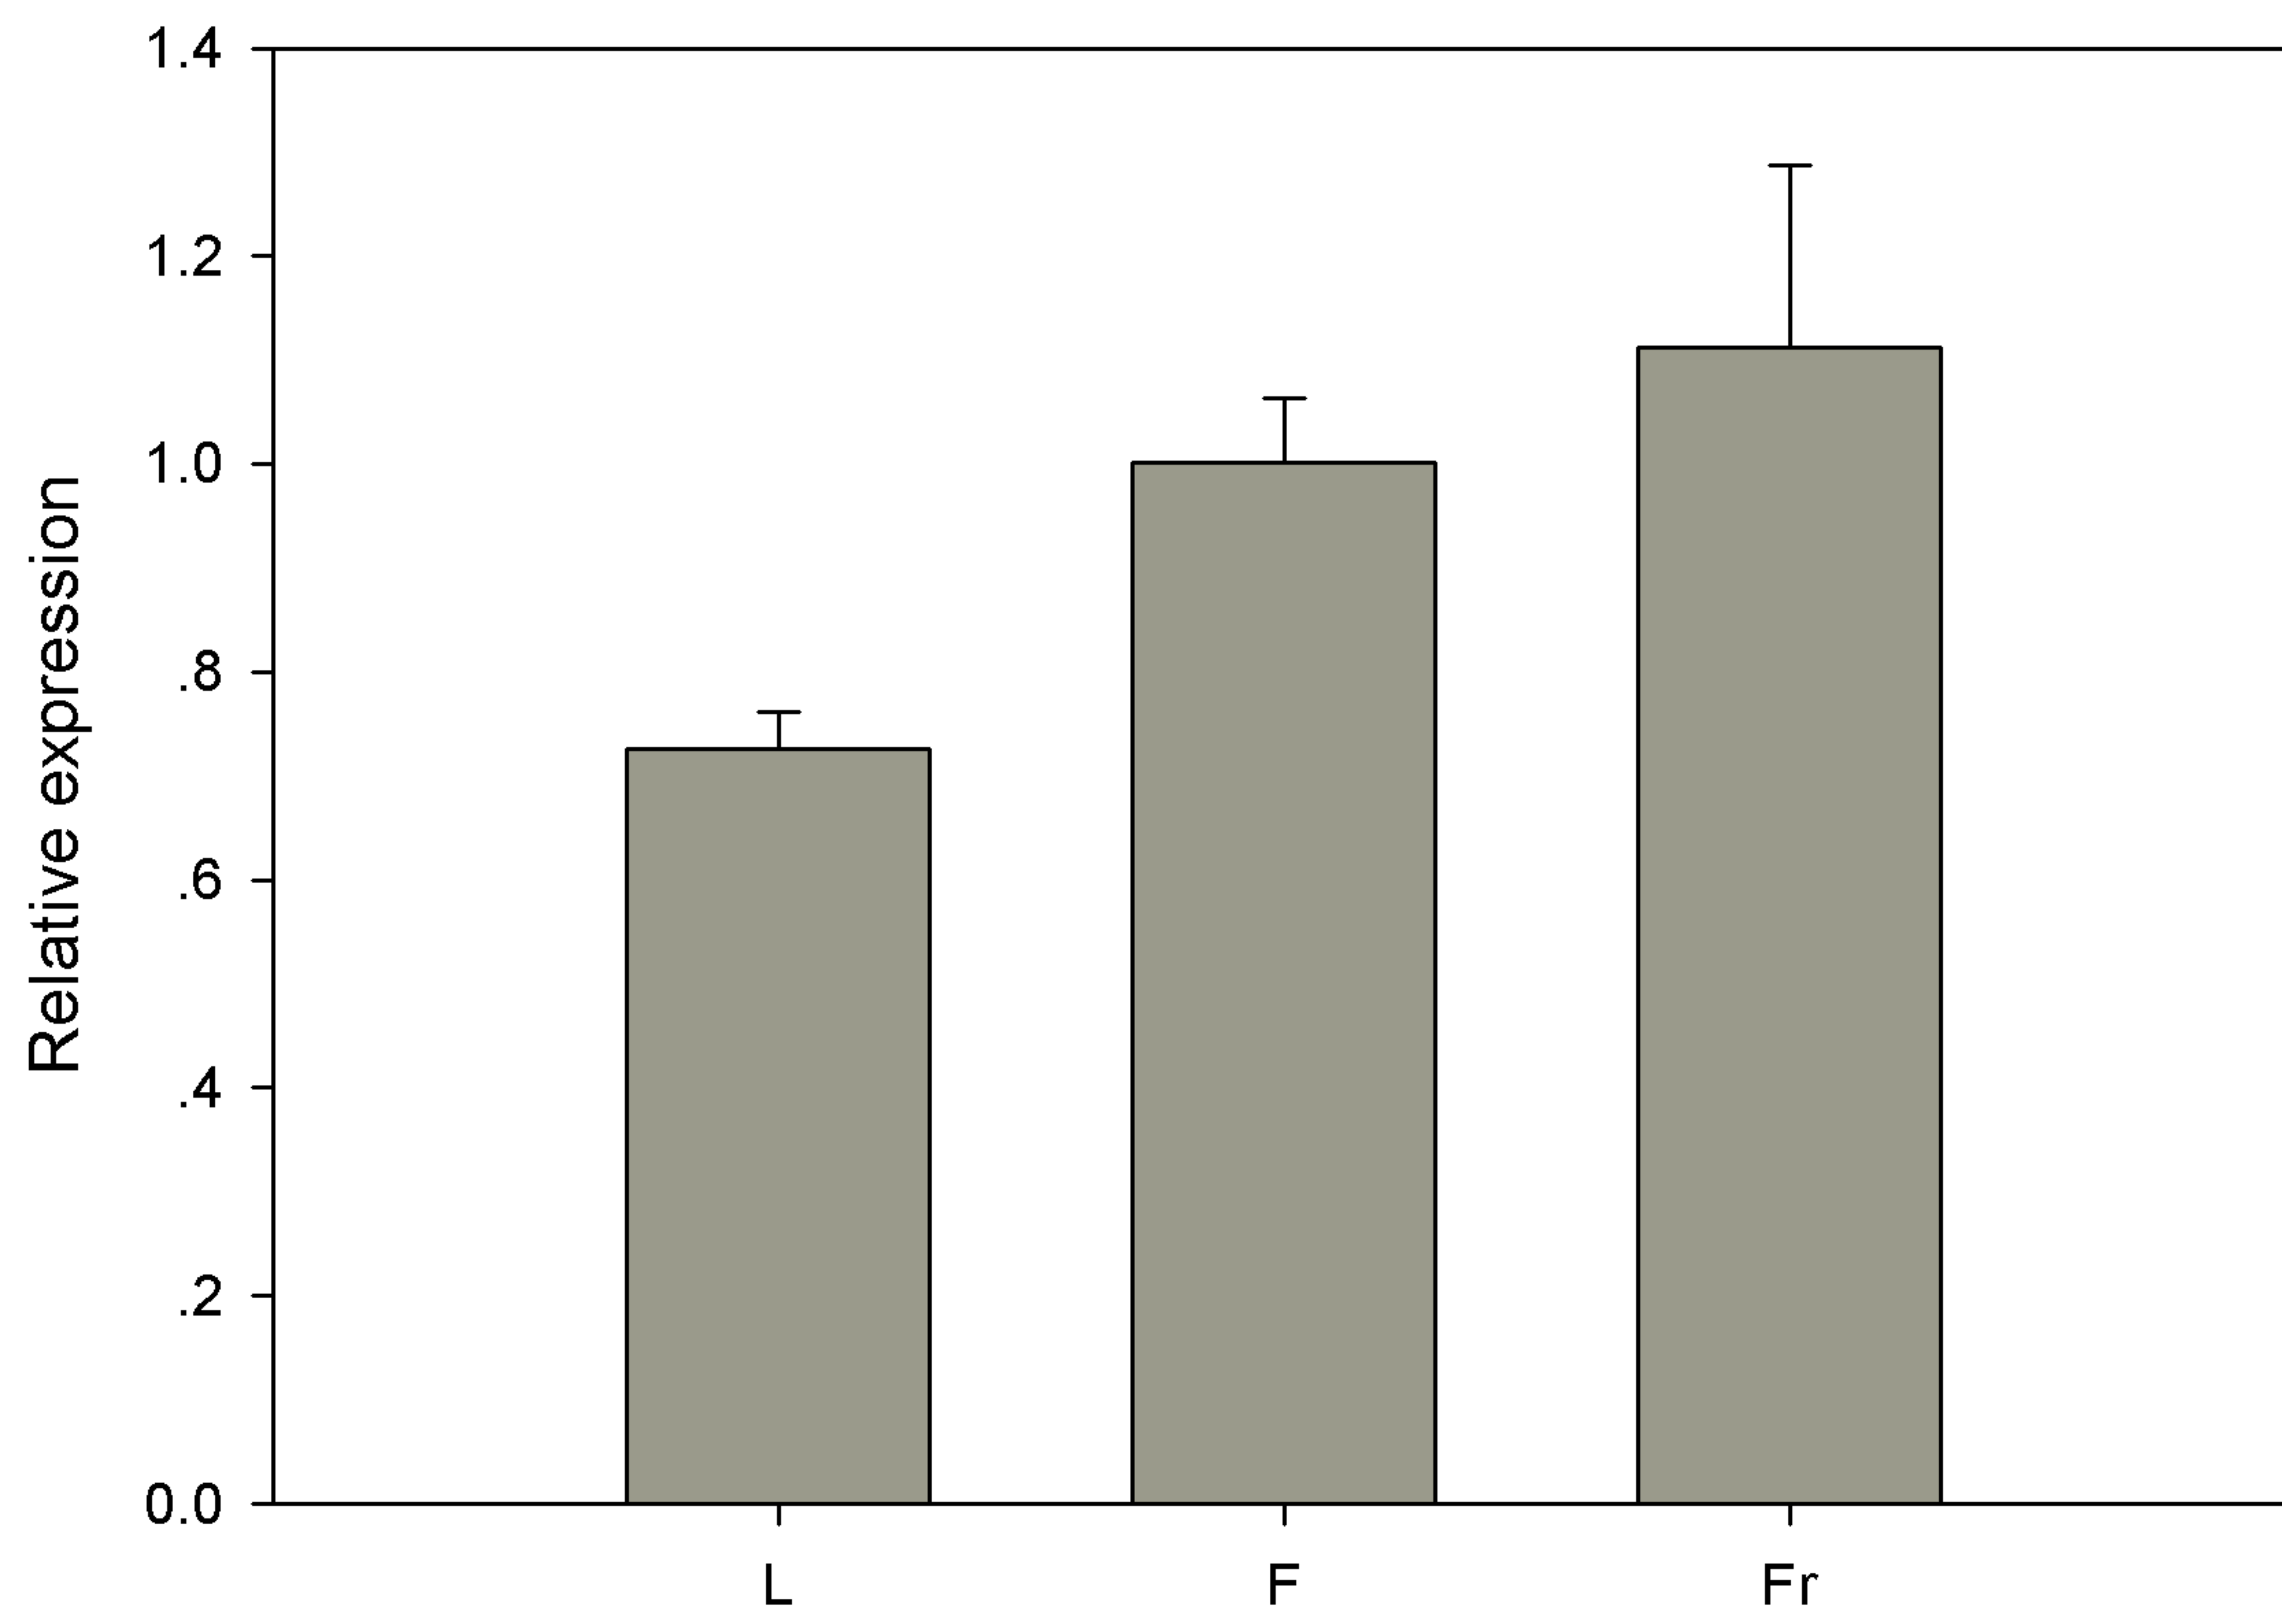

### Csi-miR399c

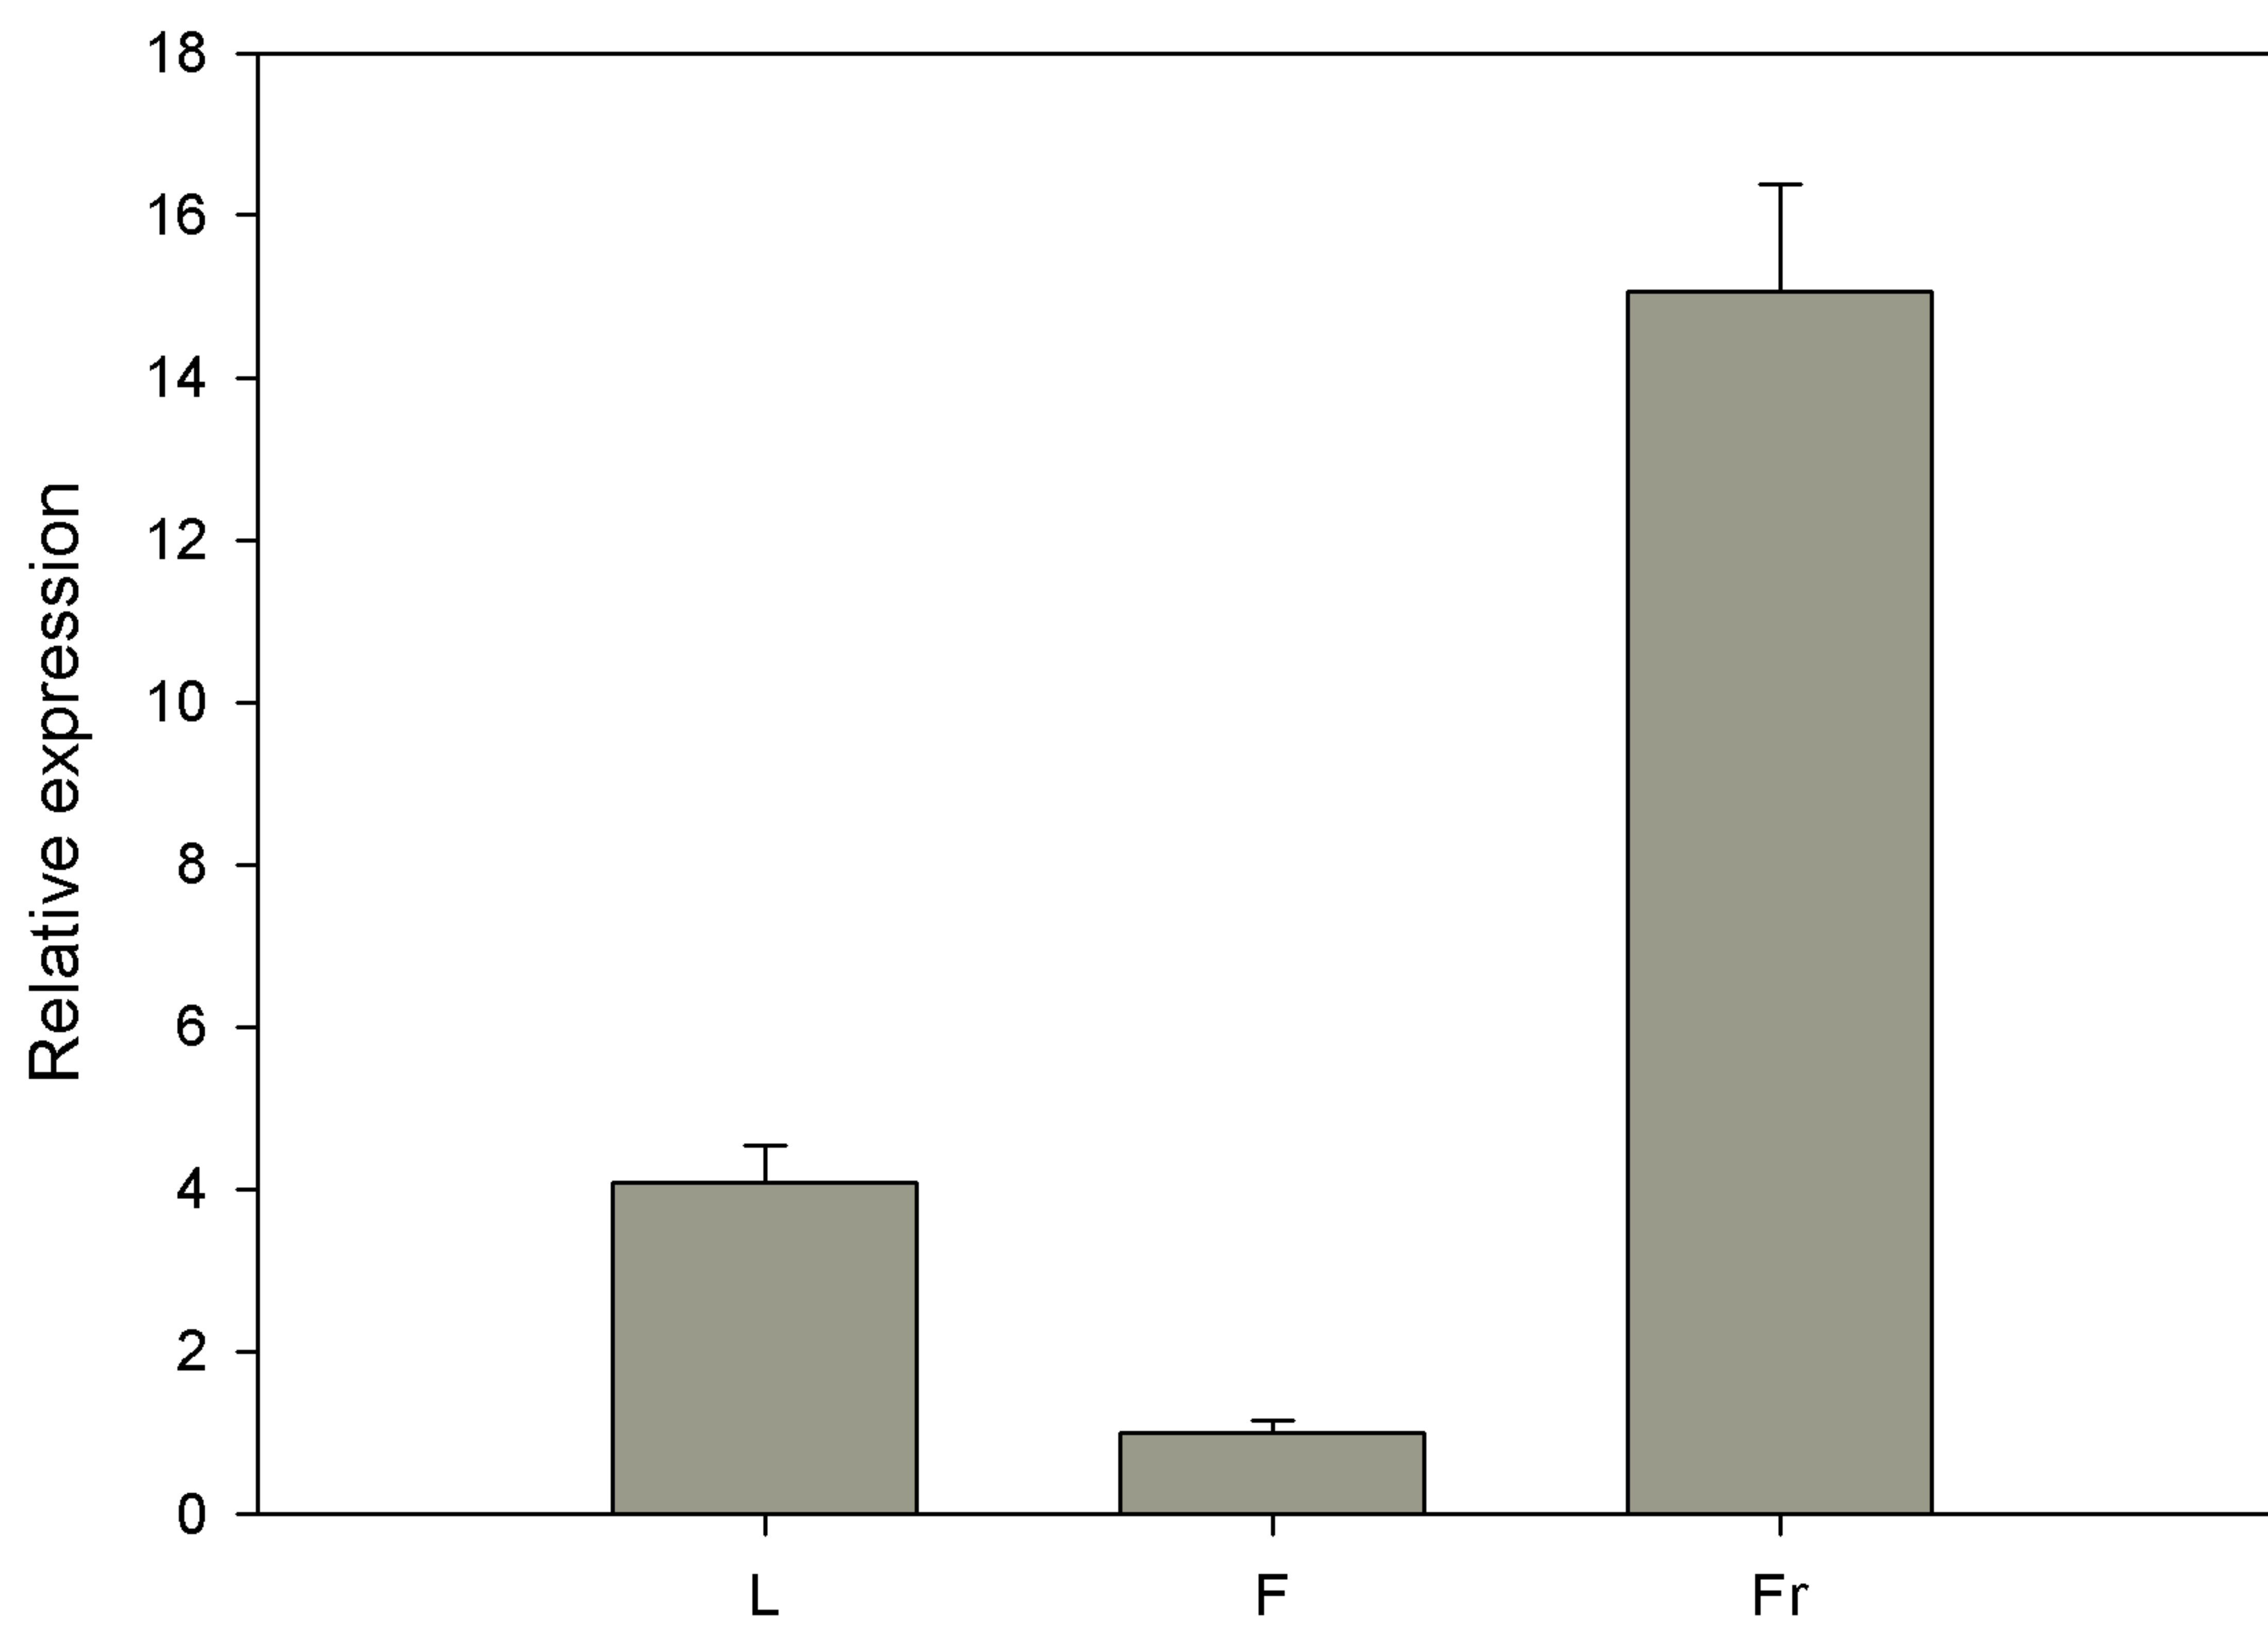



### Csi-miR403.1

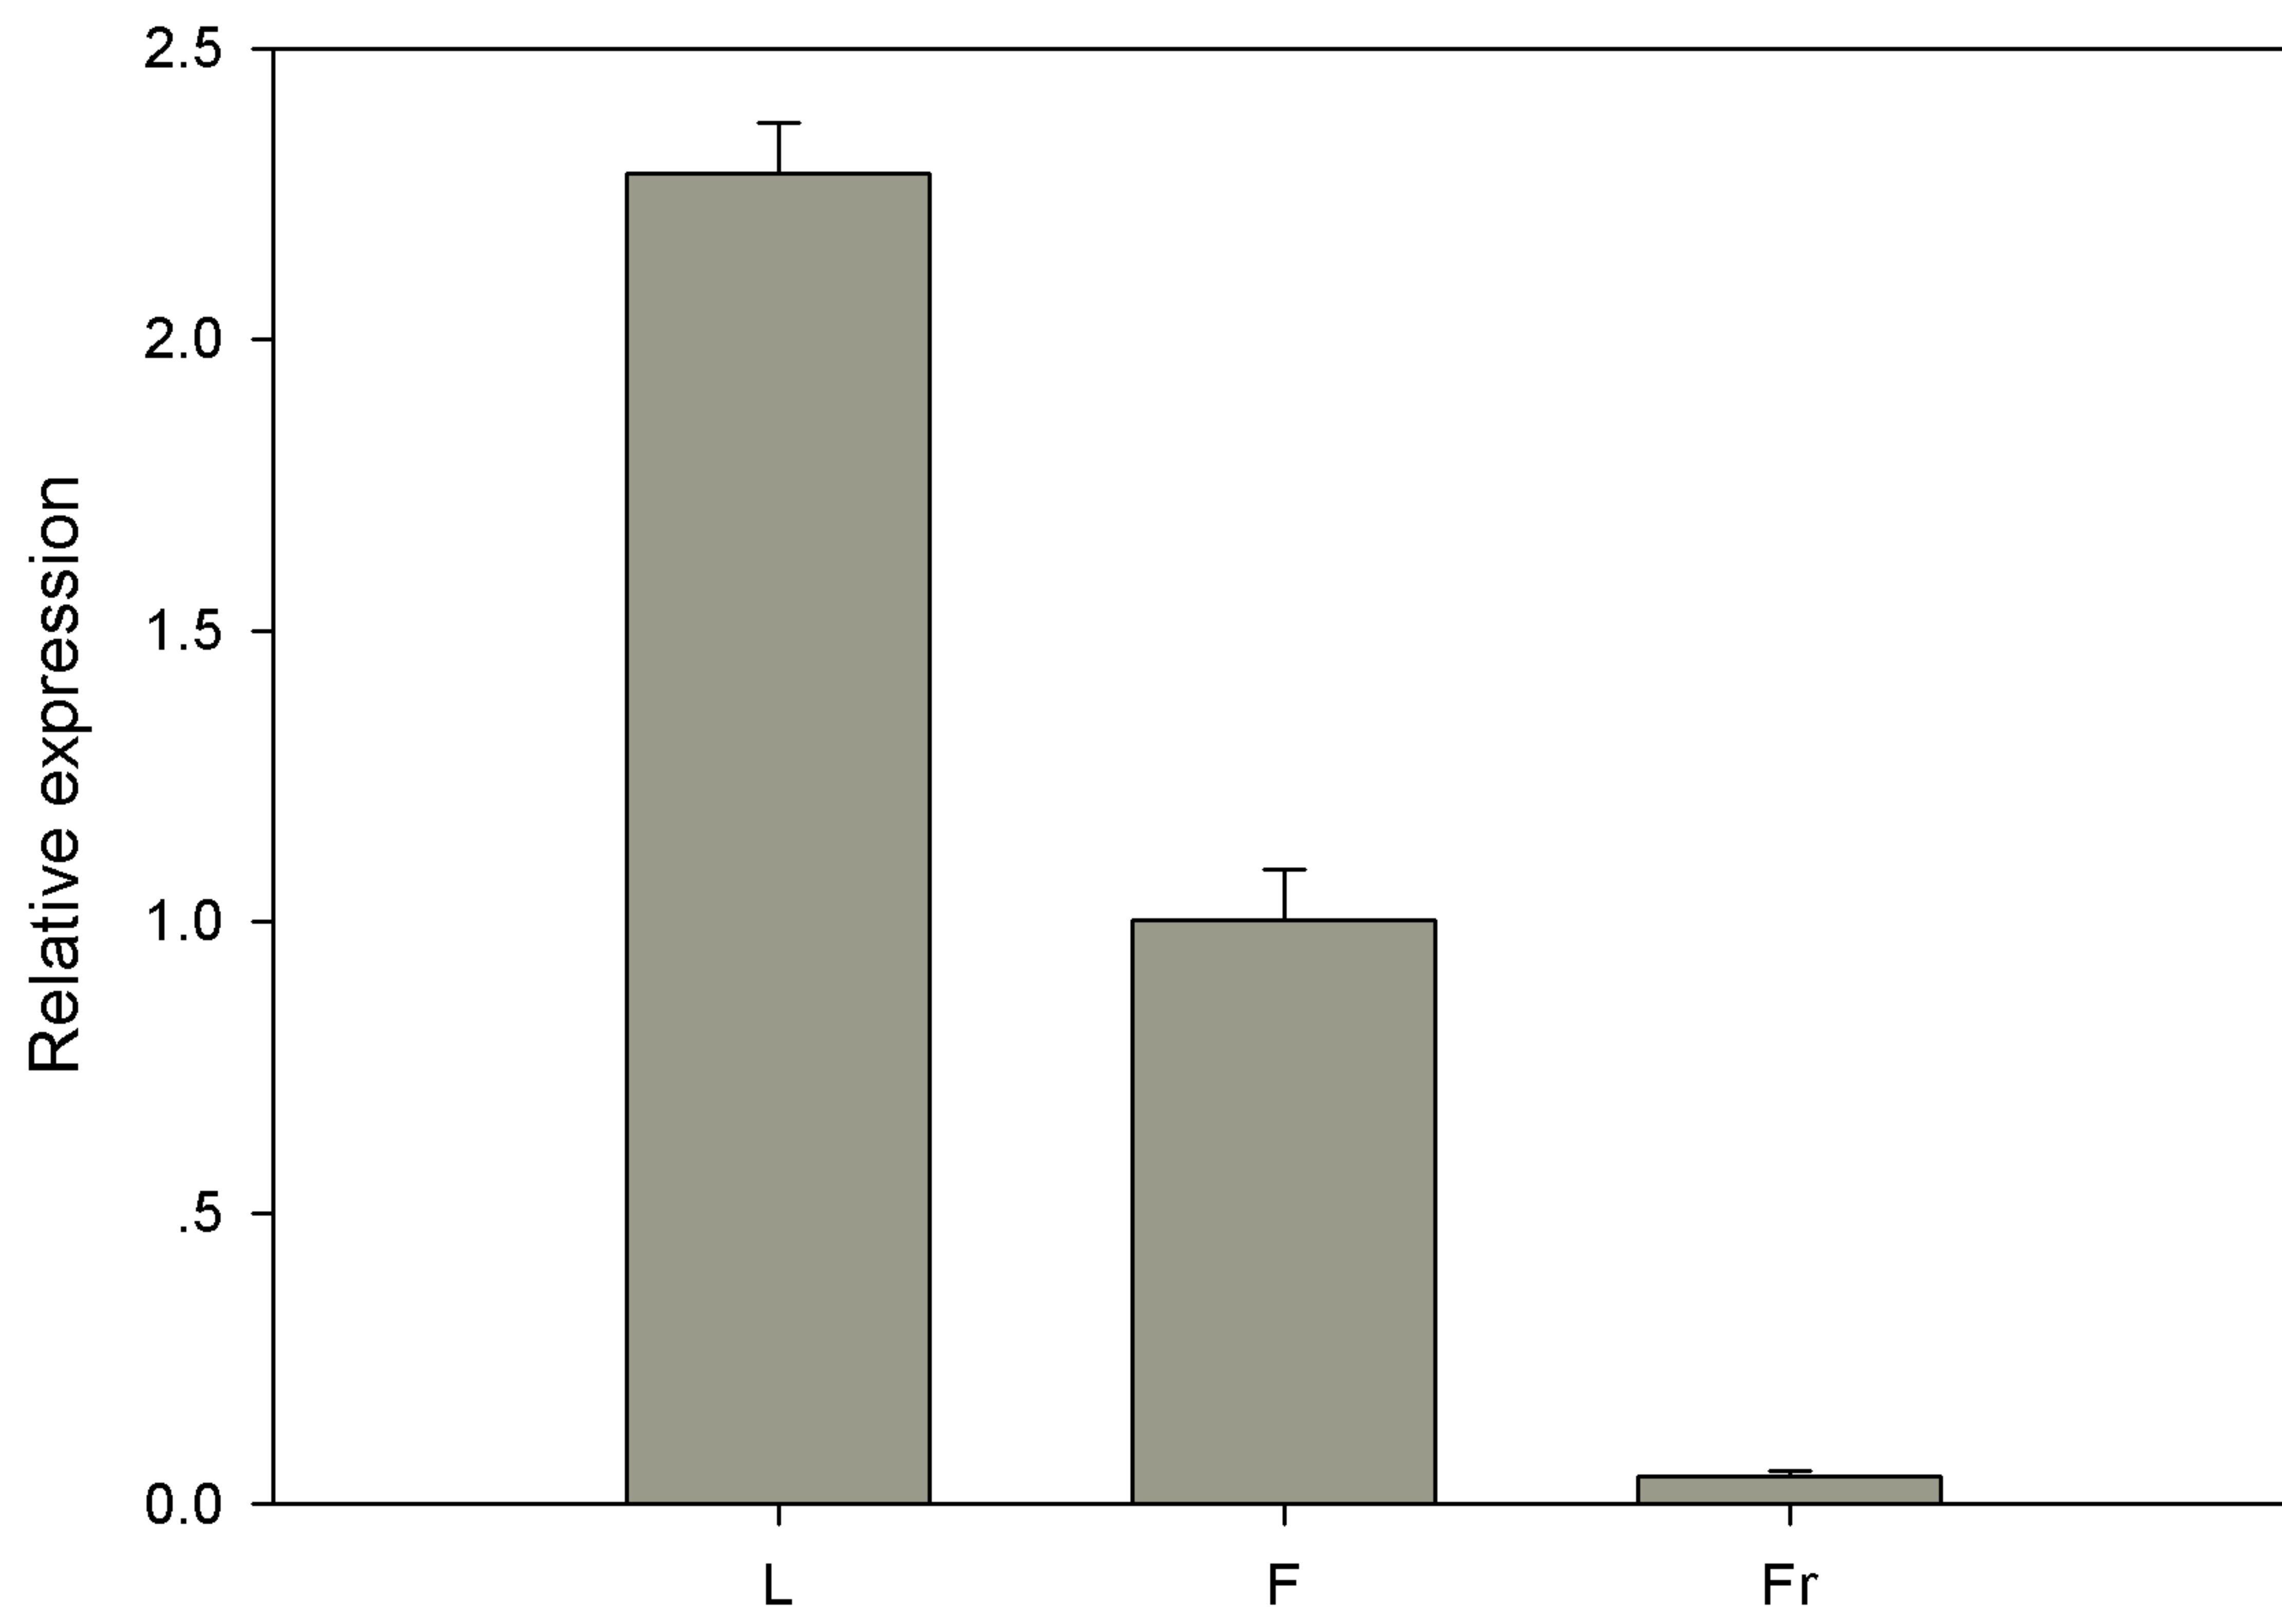

### Csi-miR408.1

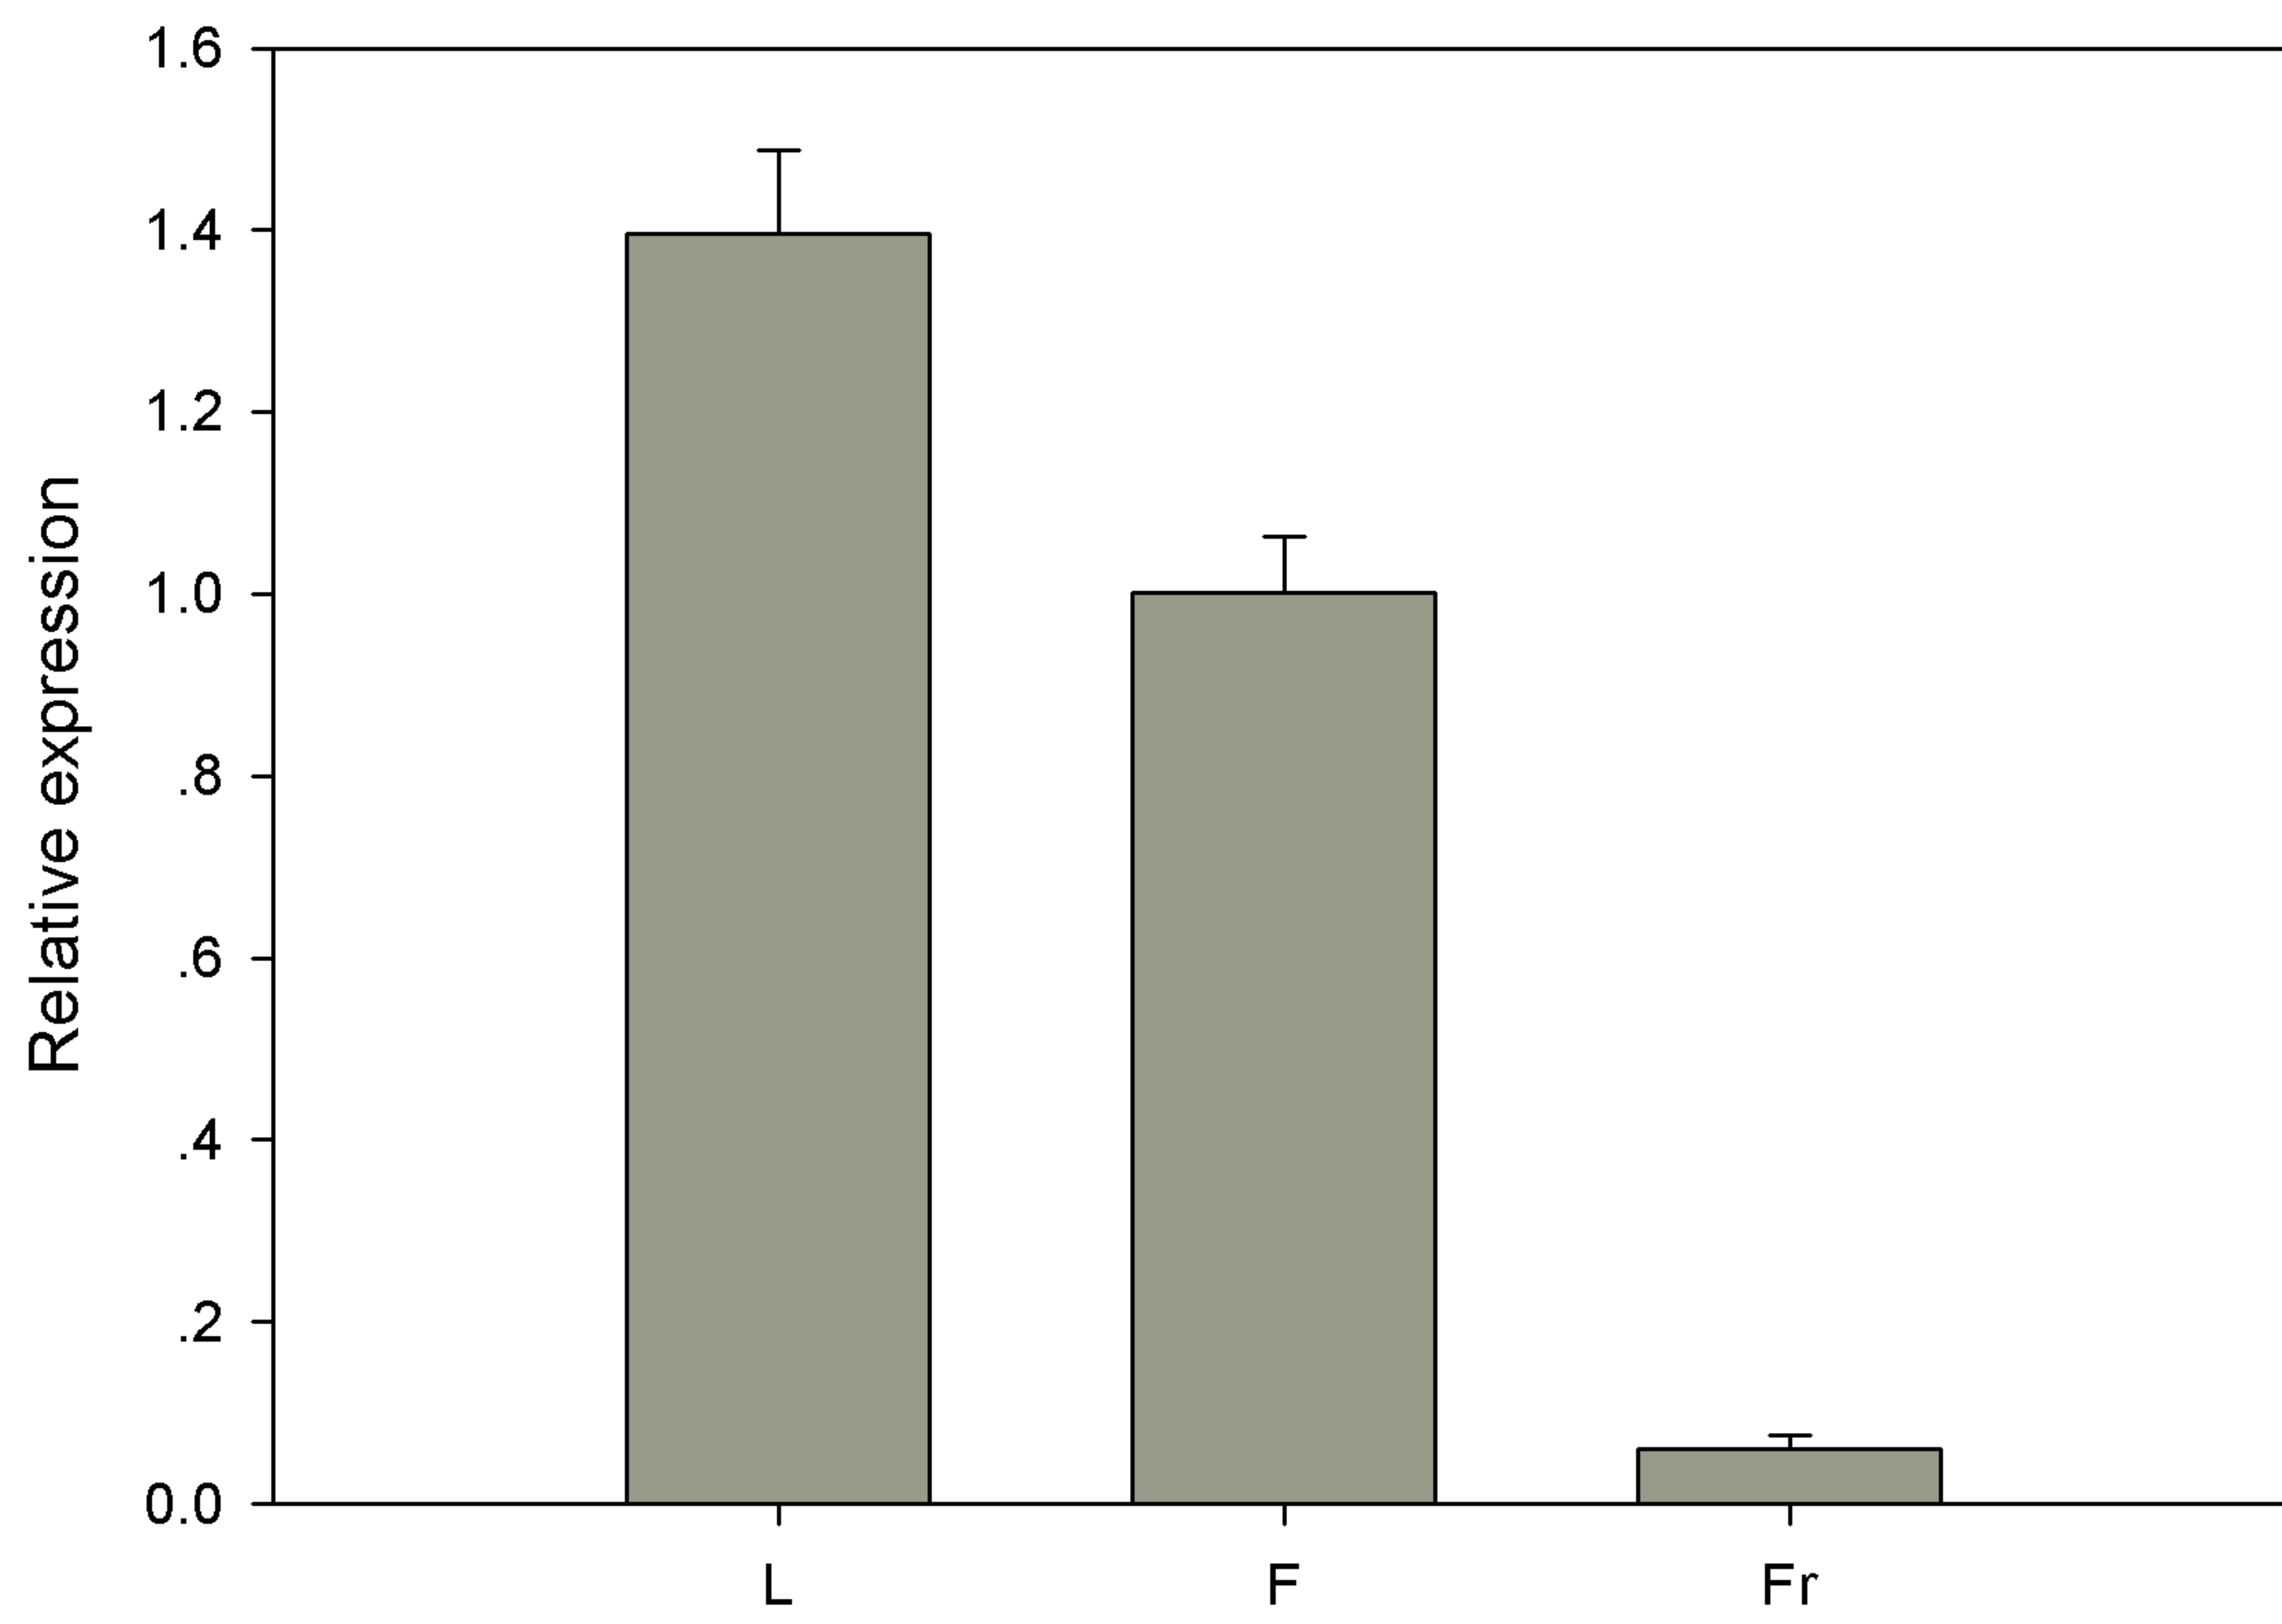

### Csi-miR4414.1

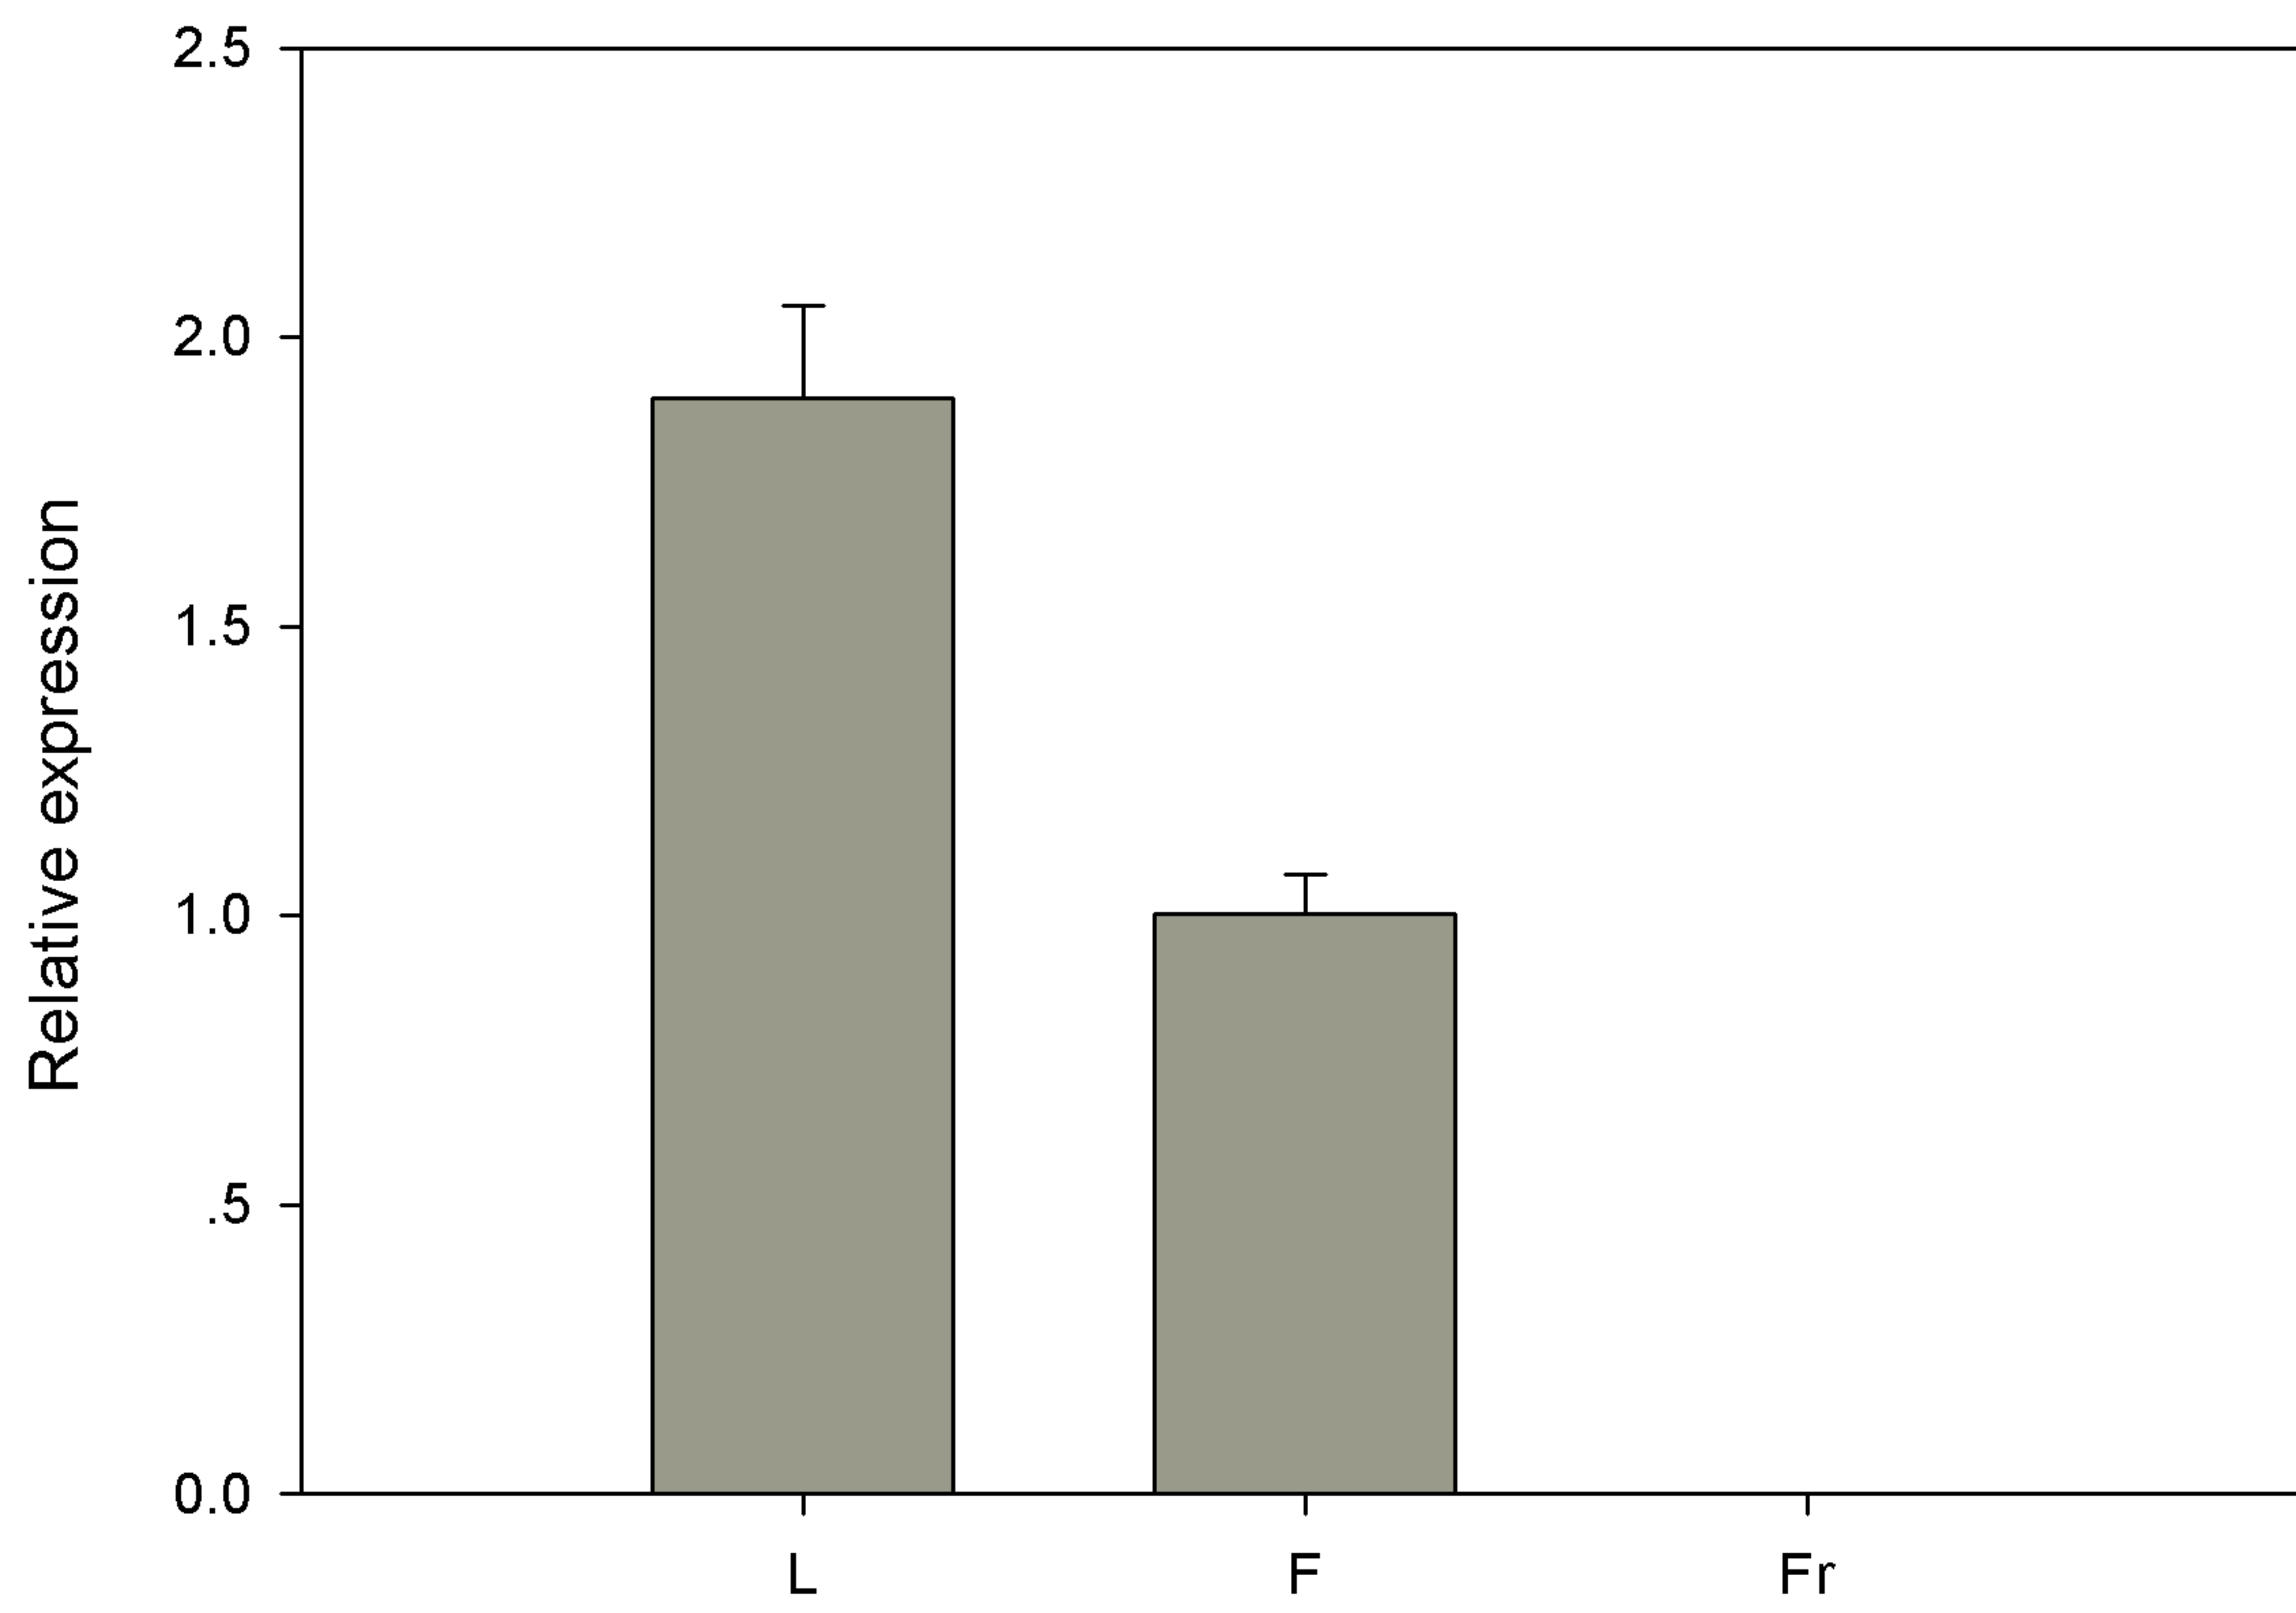

### Csi-miR444a.2

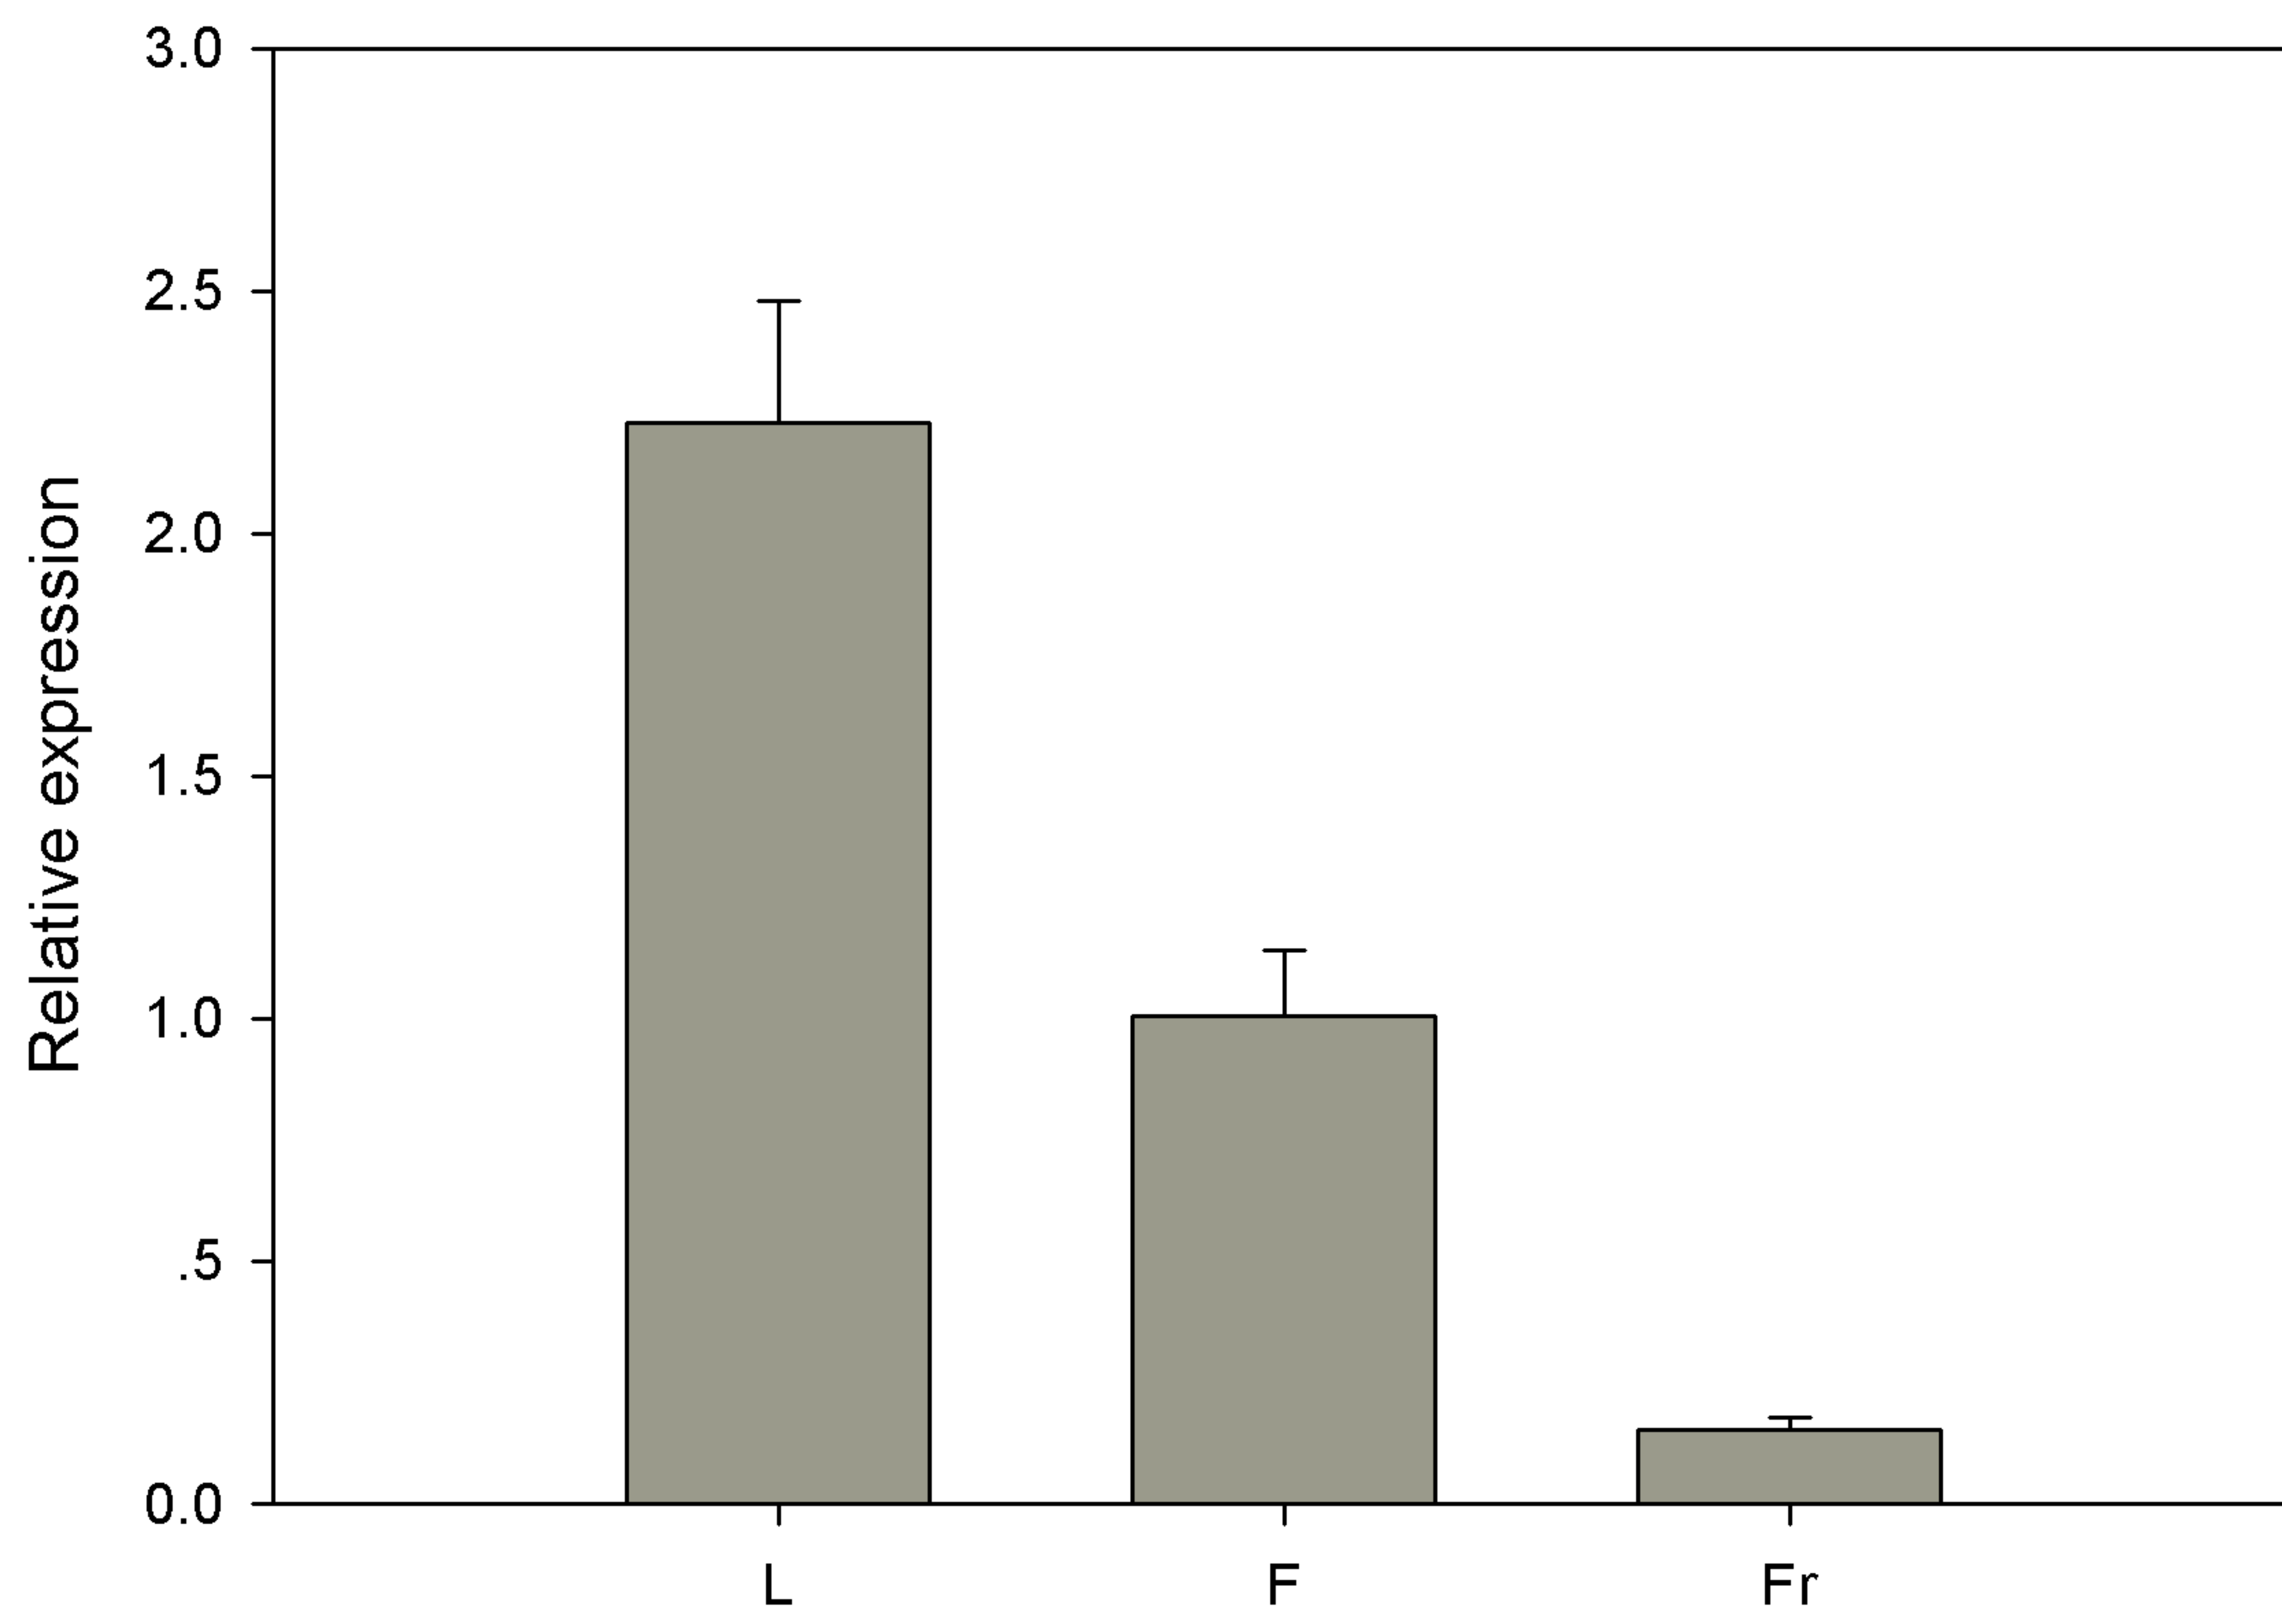

### Csi-miR473

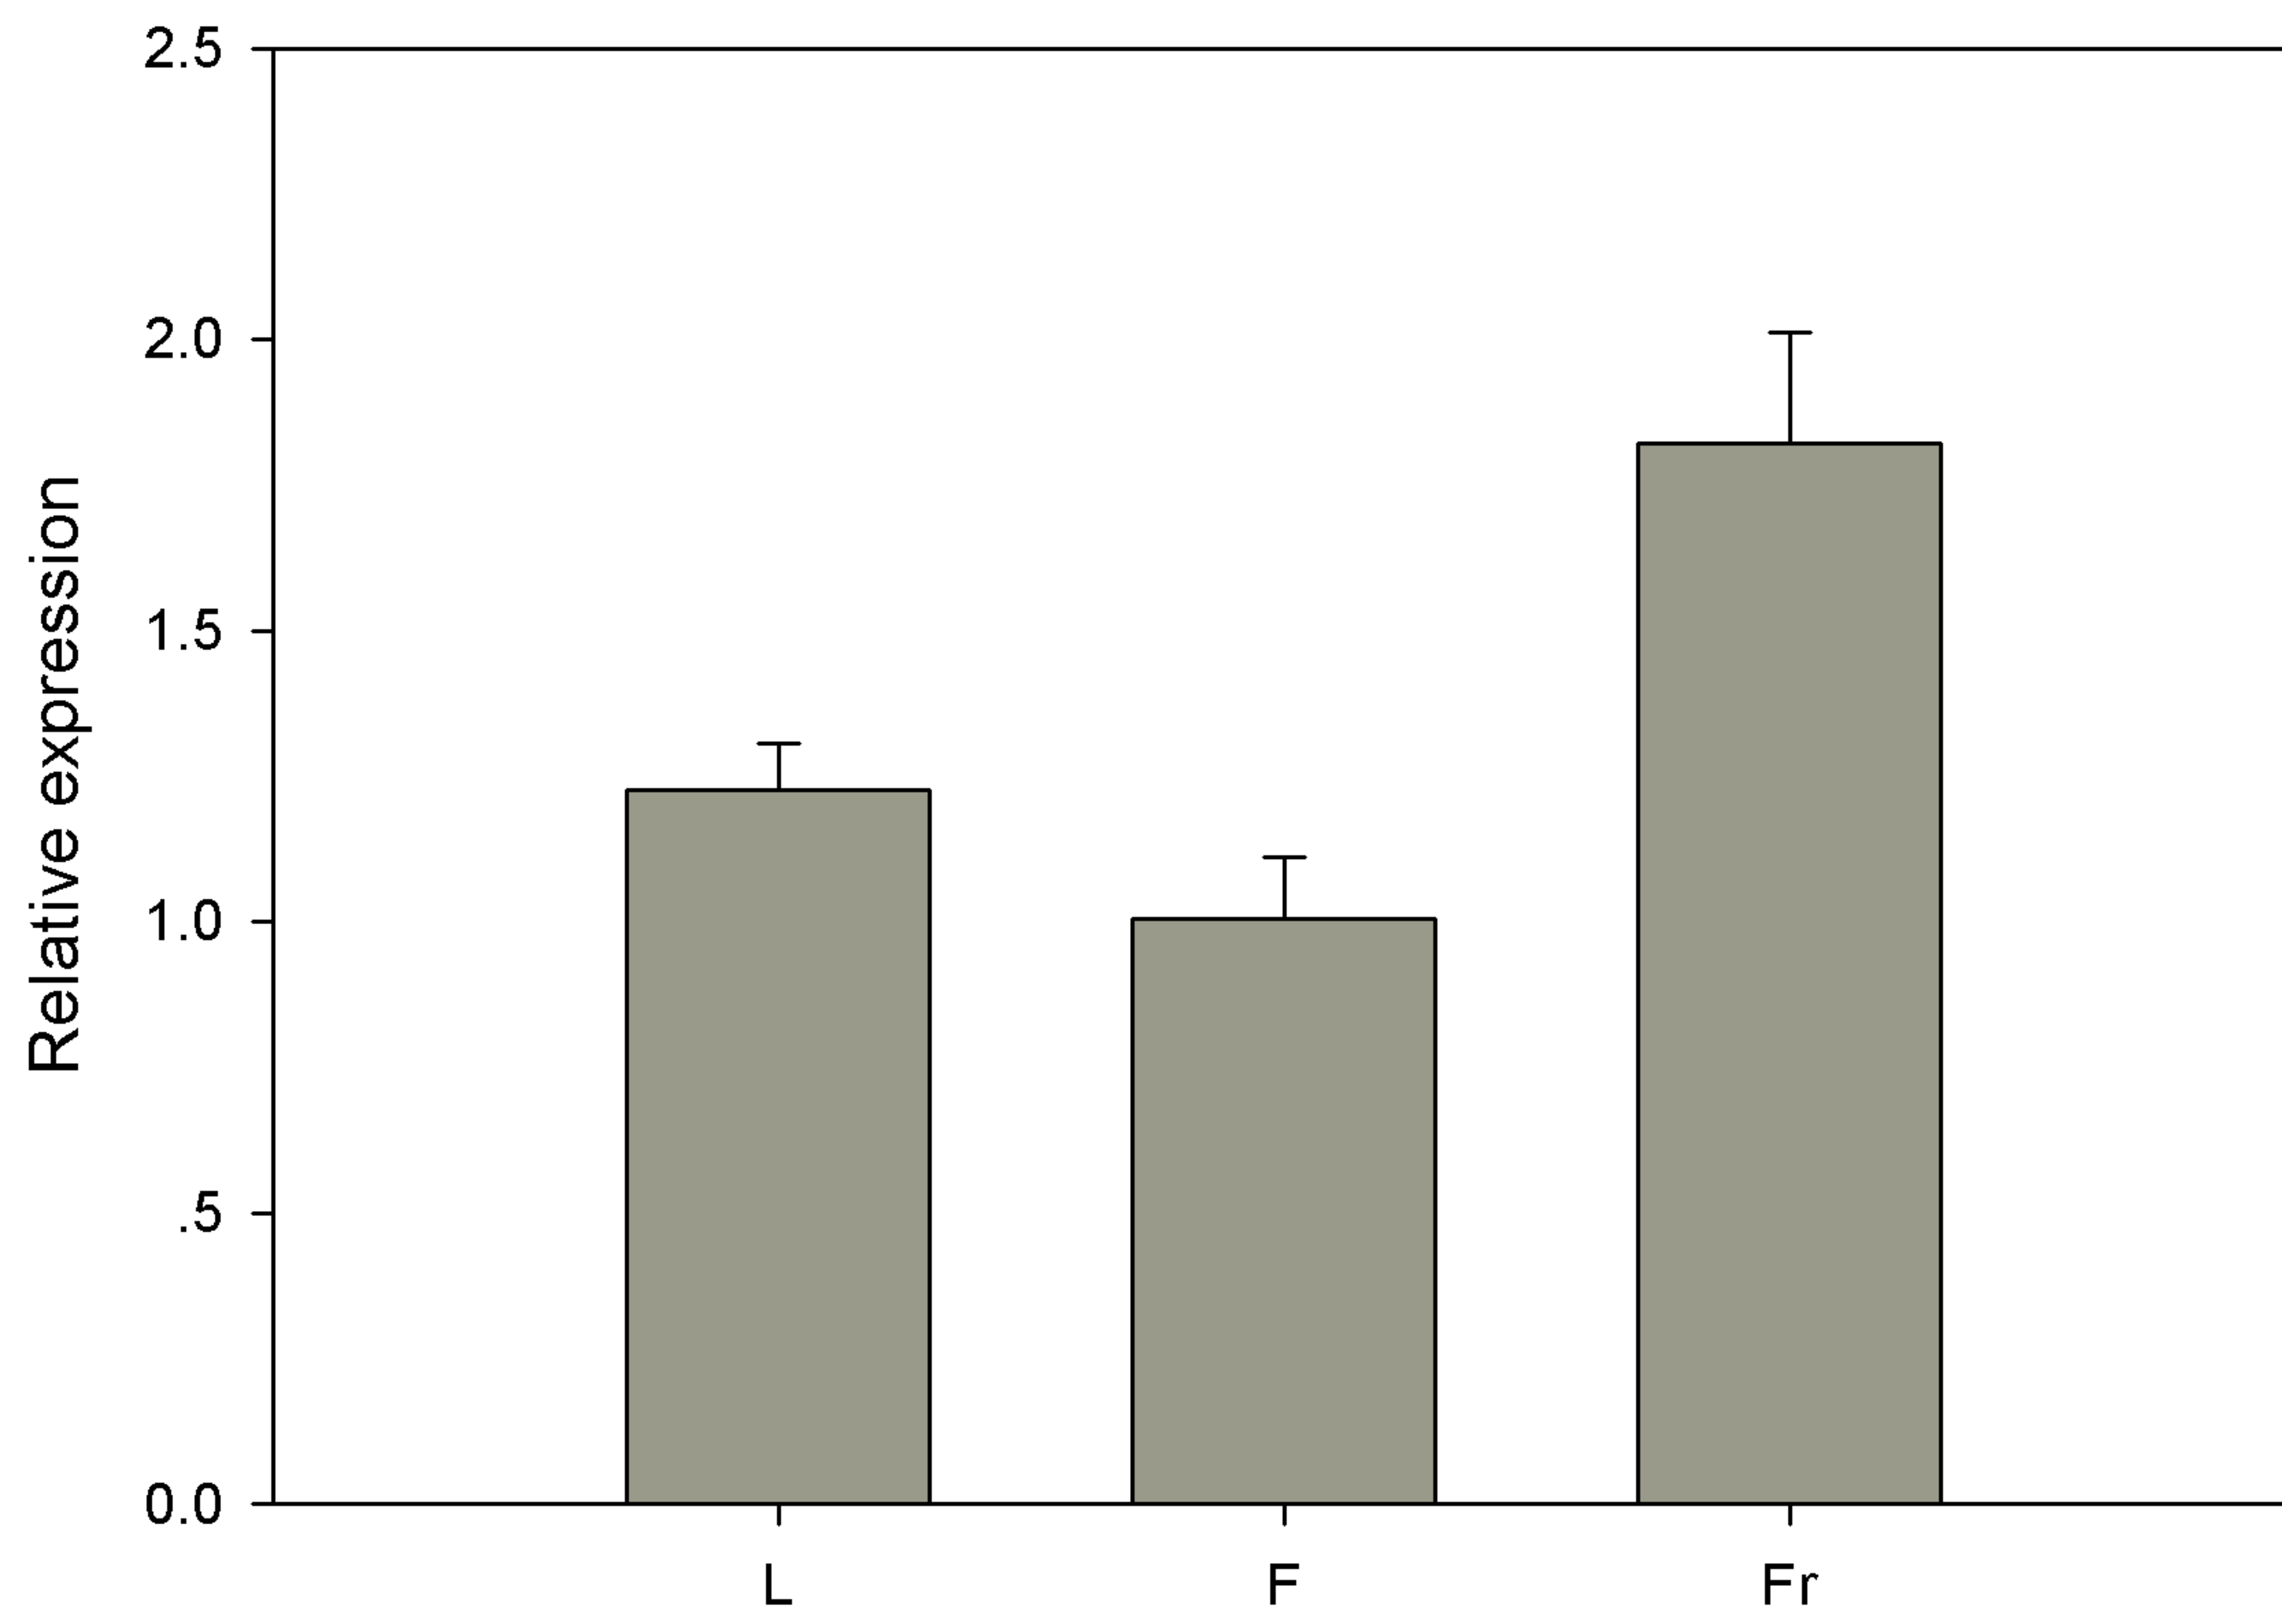

### Csi-miR477a-3p

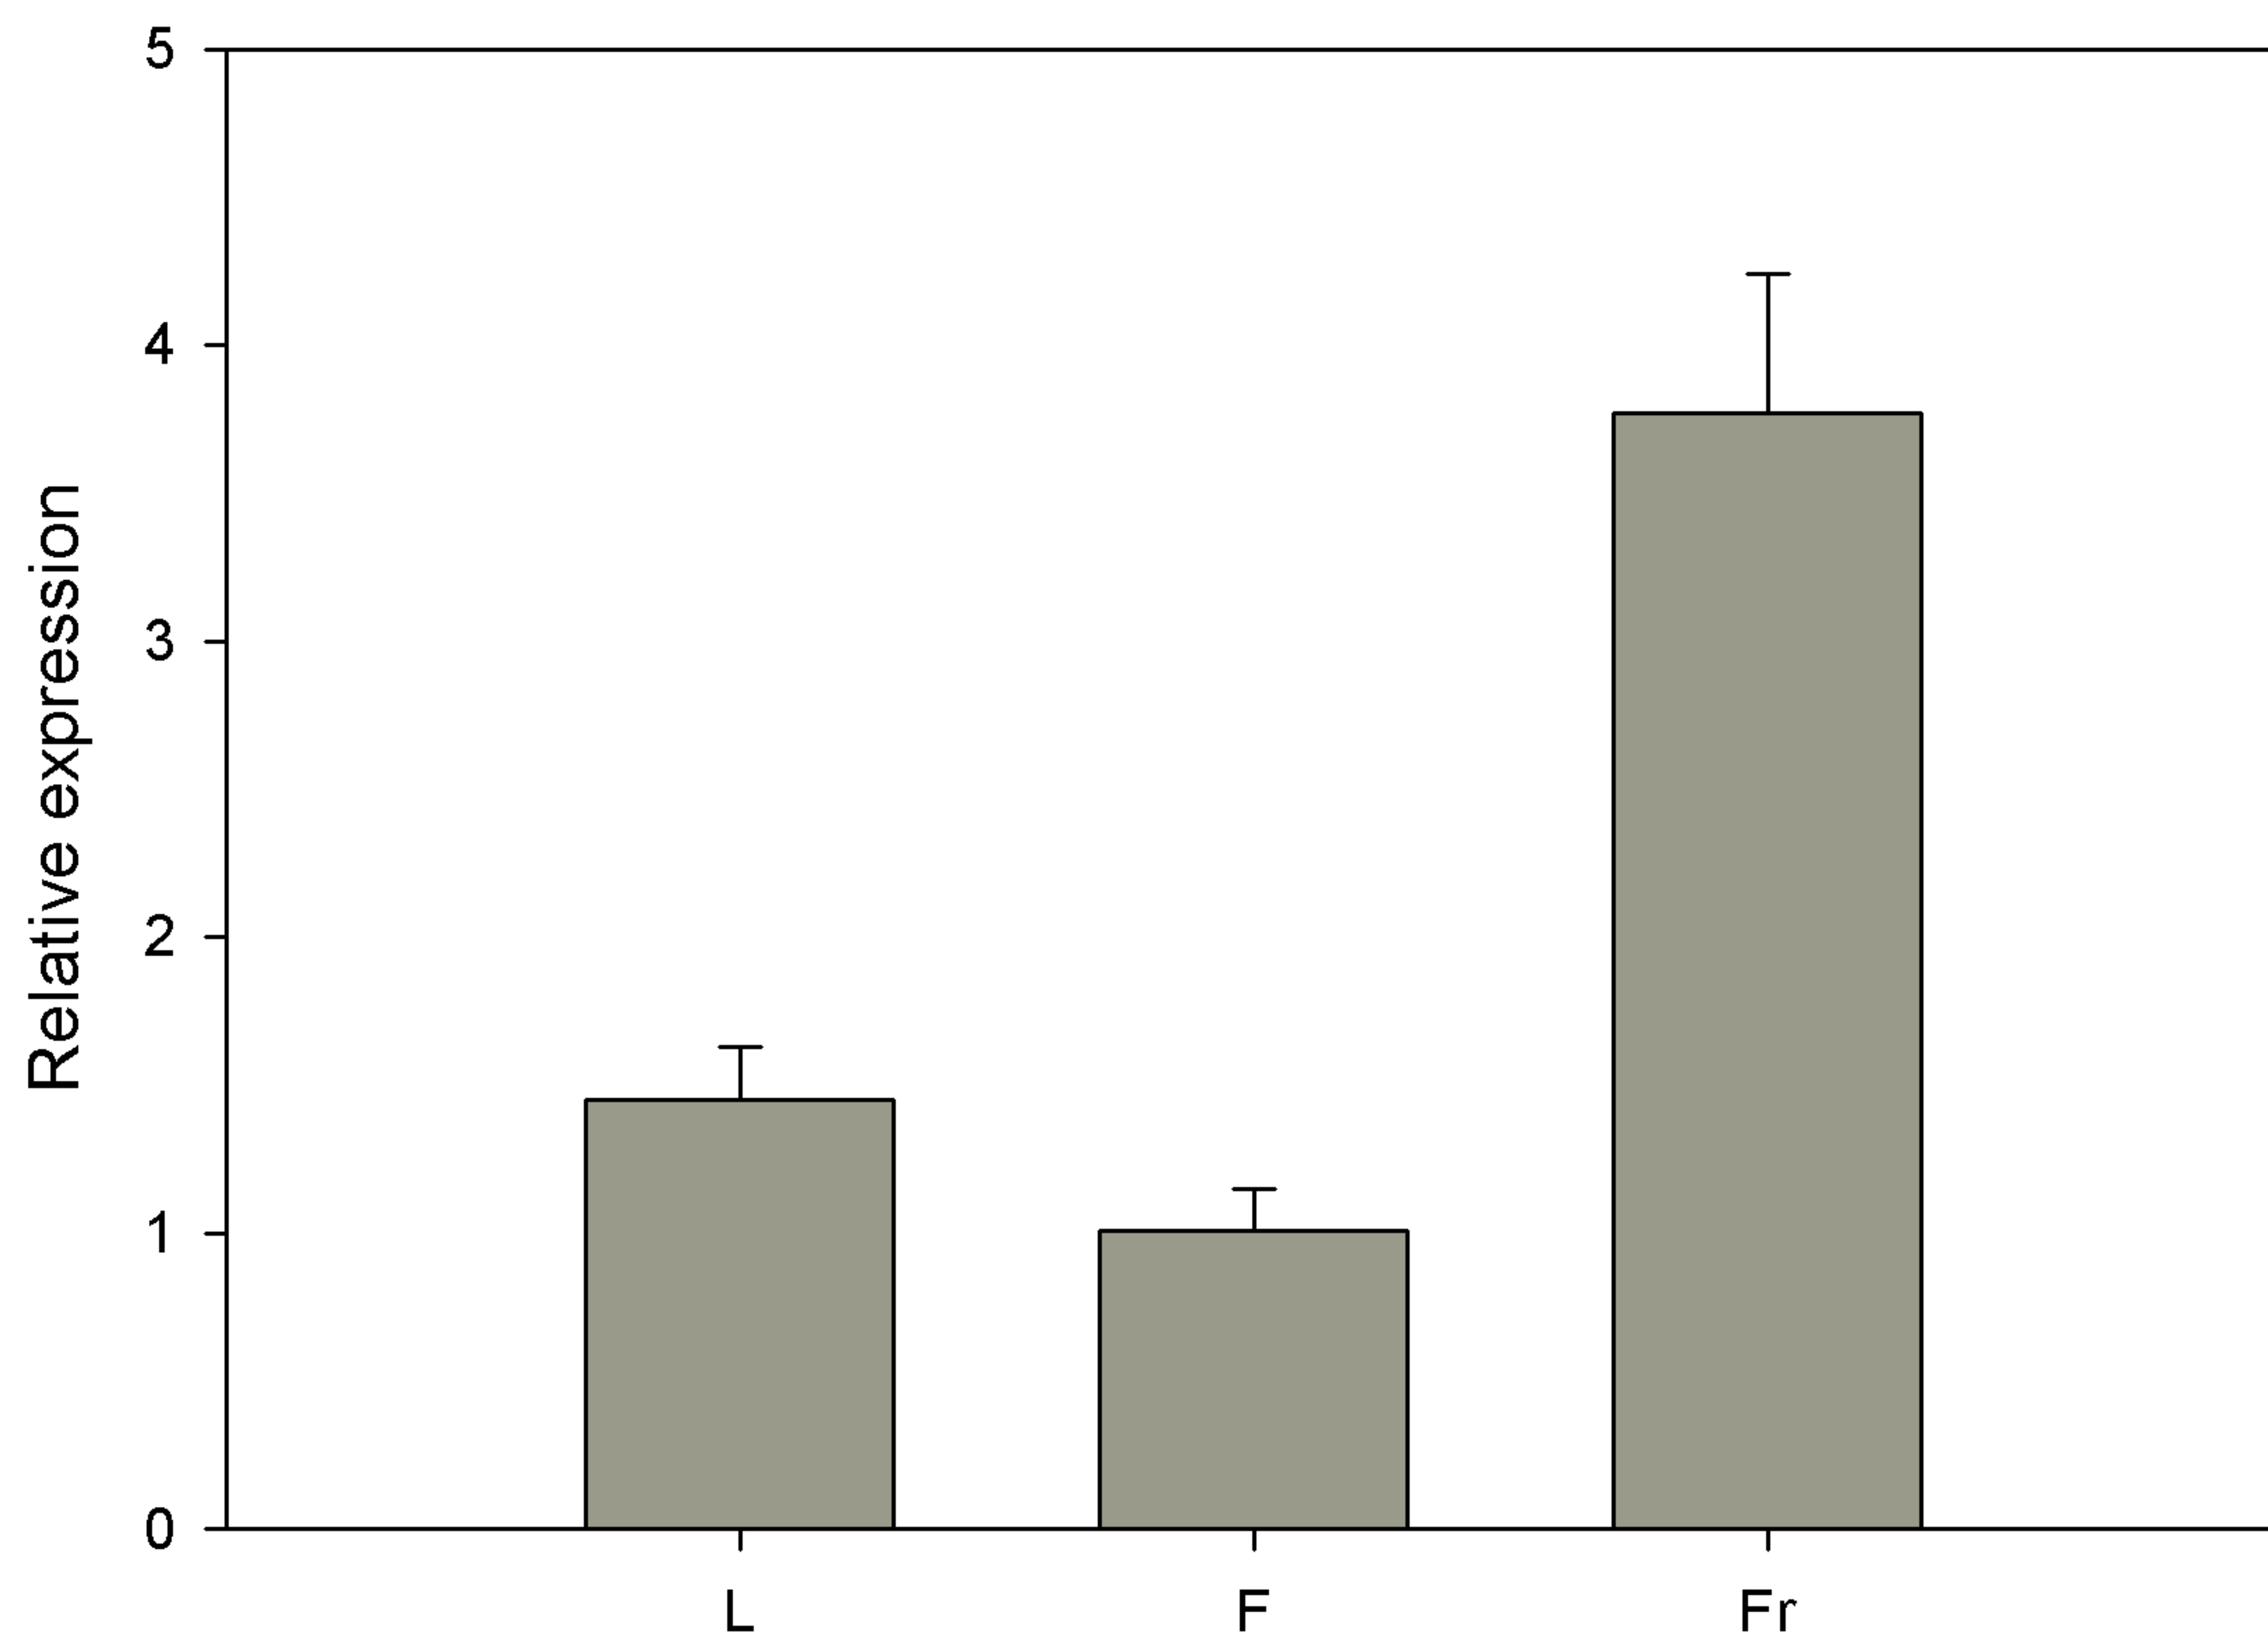

Csi-miR477d.1-3p

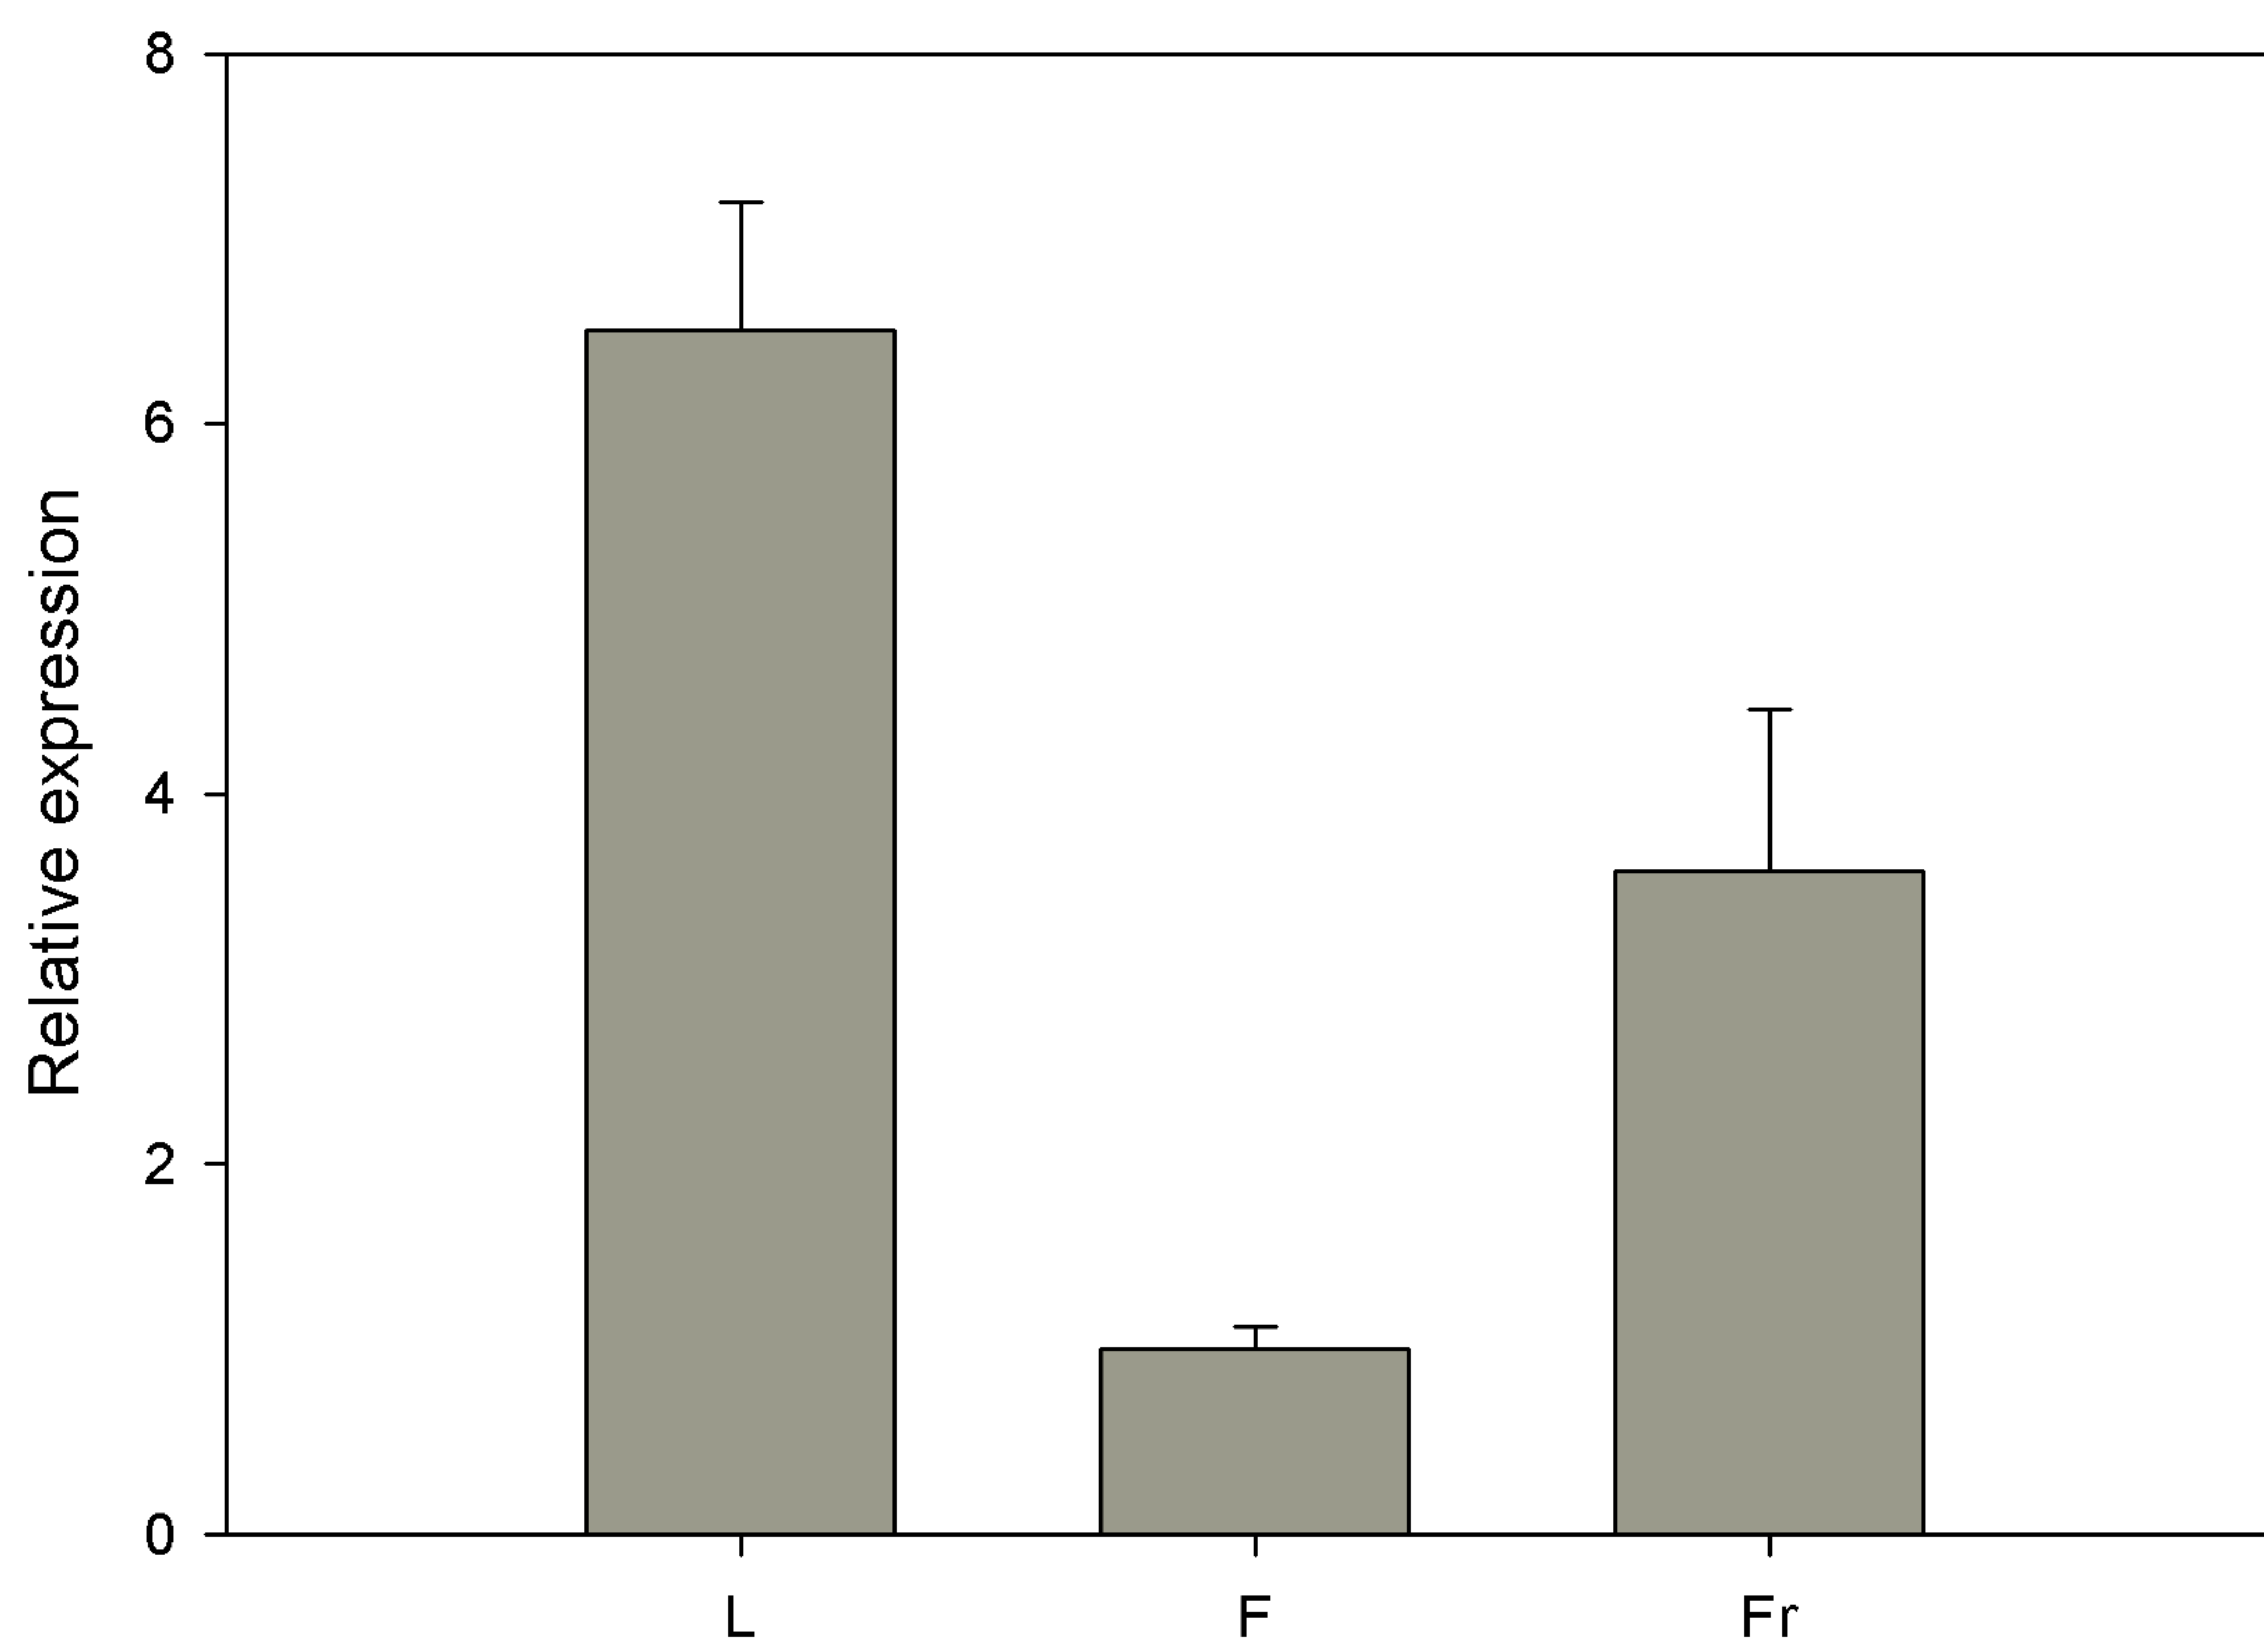

### Csi-miR479.1

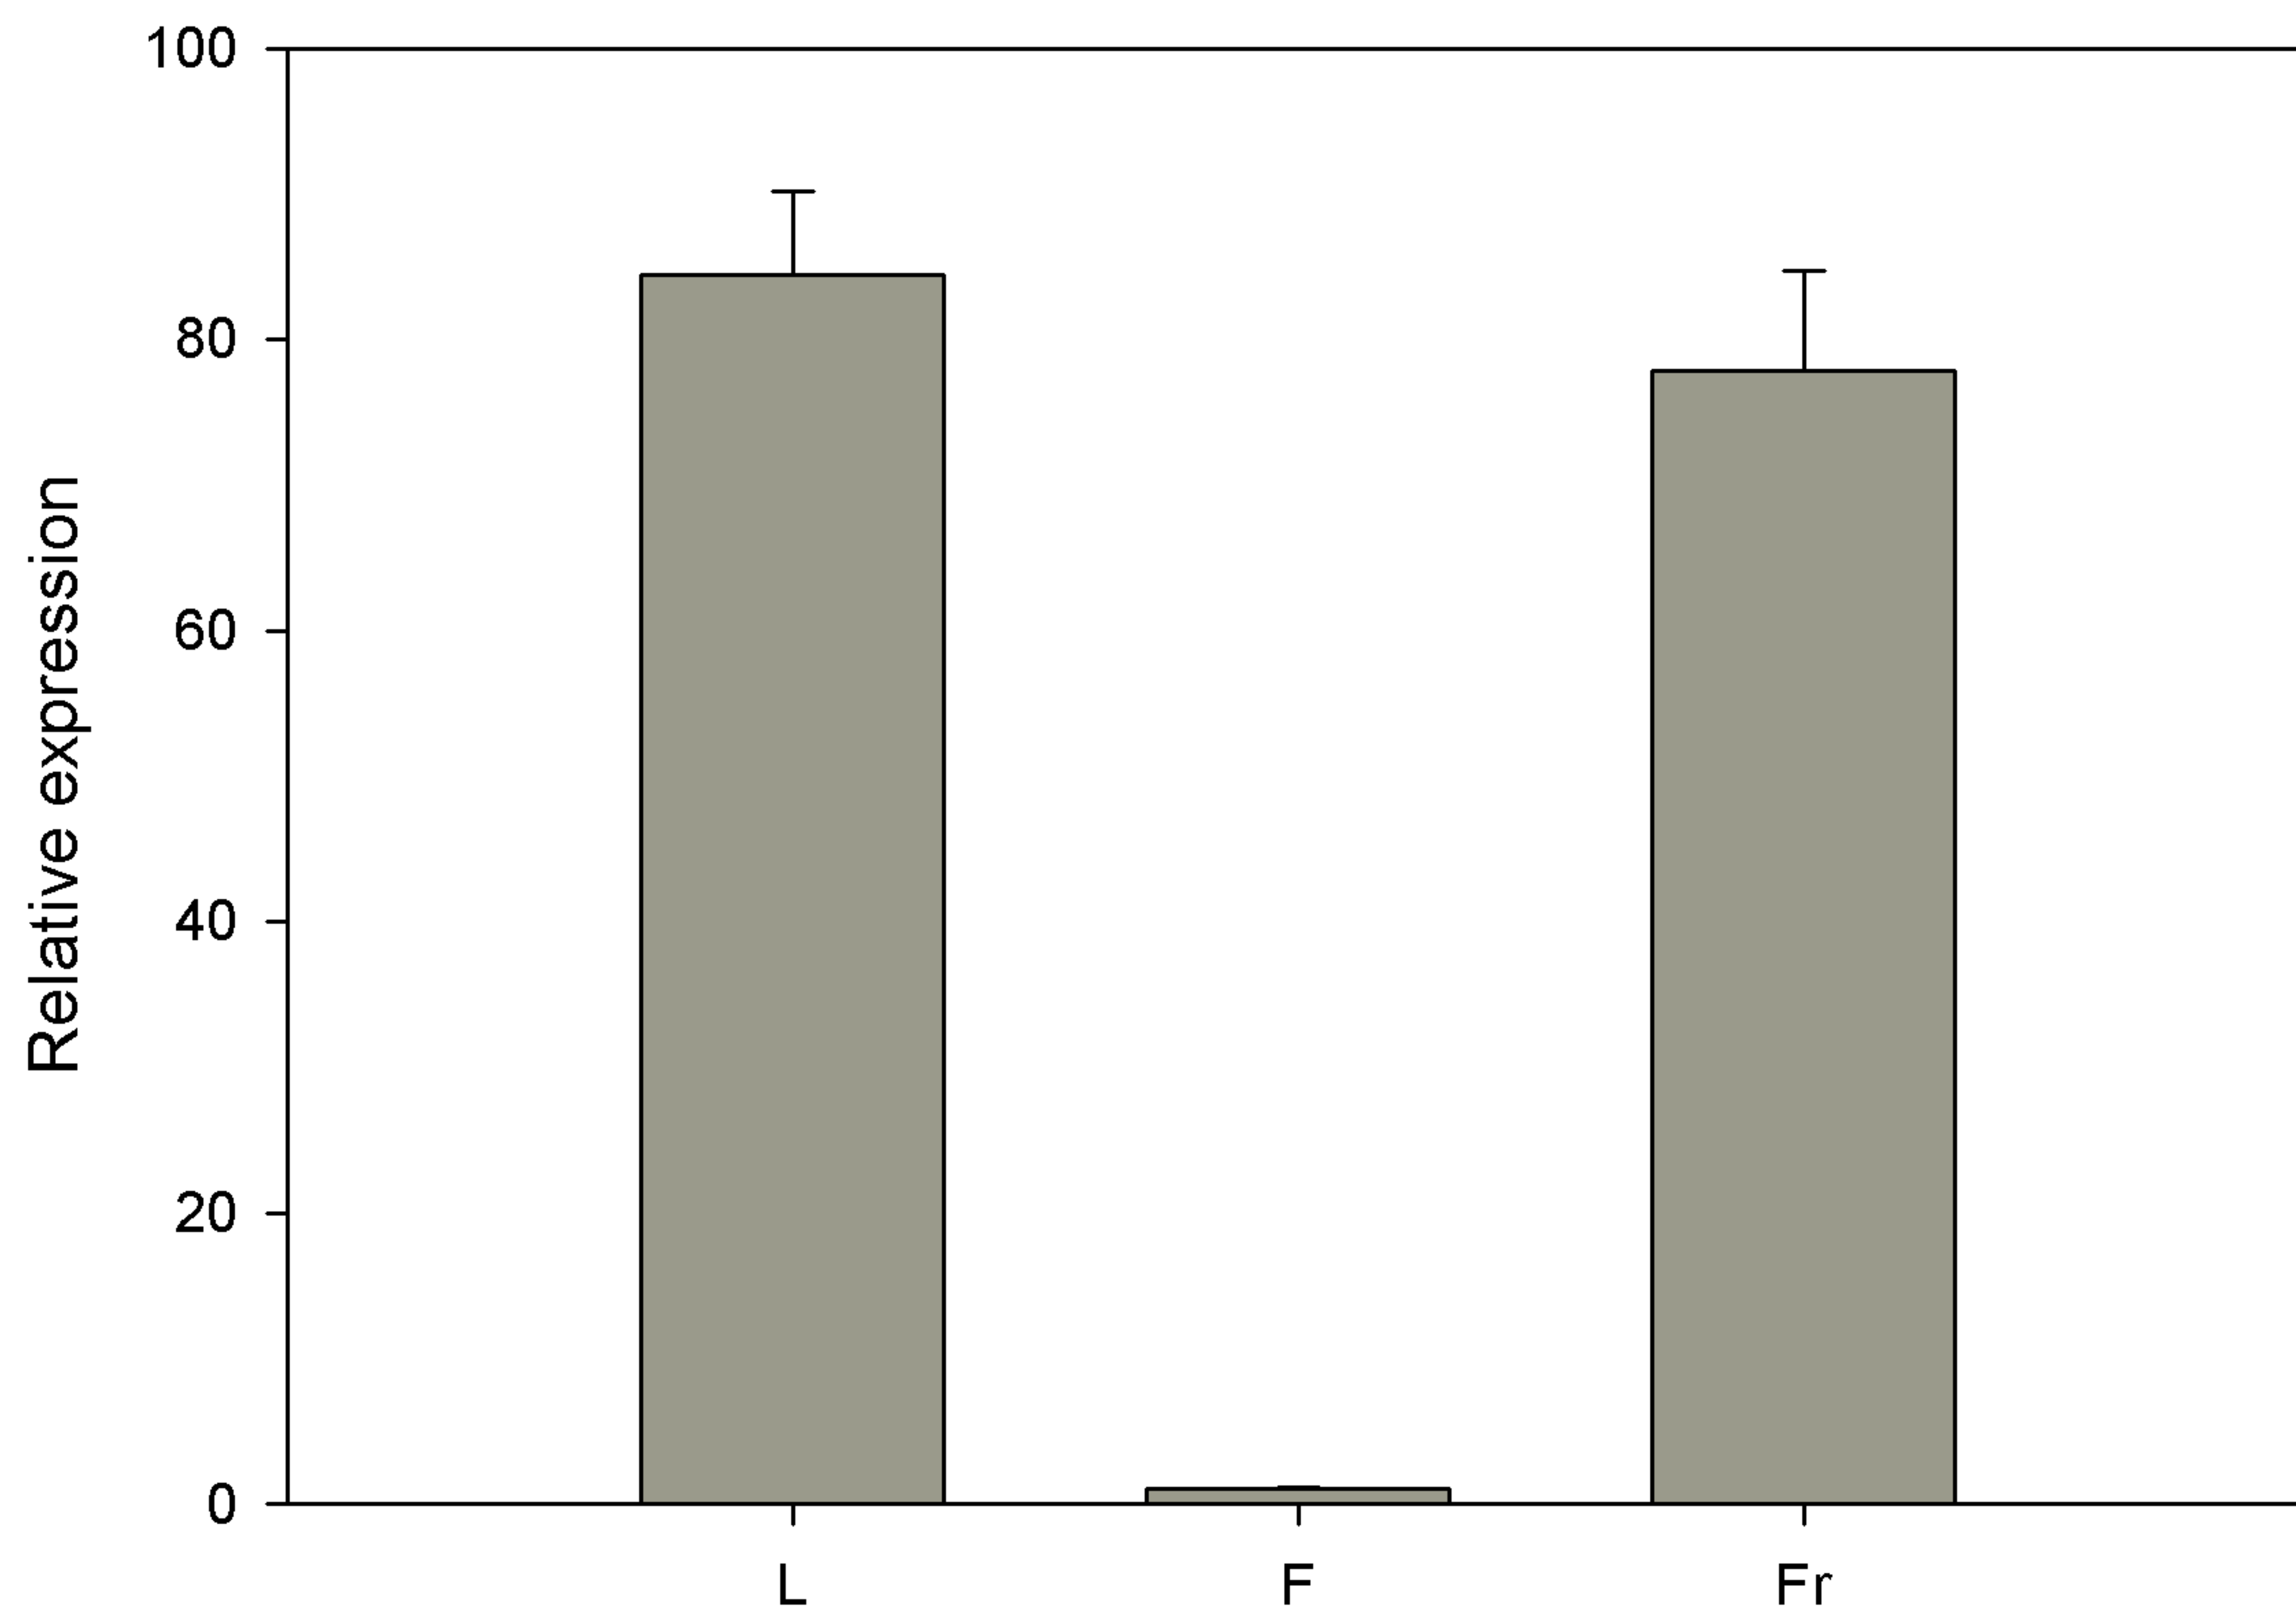



### Csi-miR482a-5p

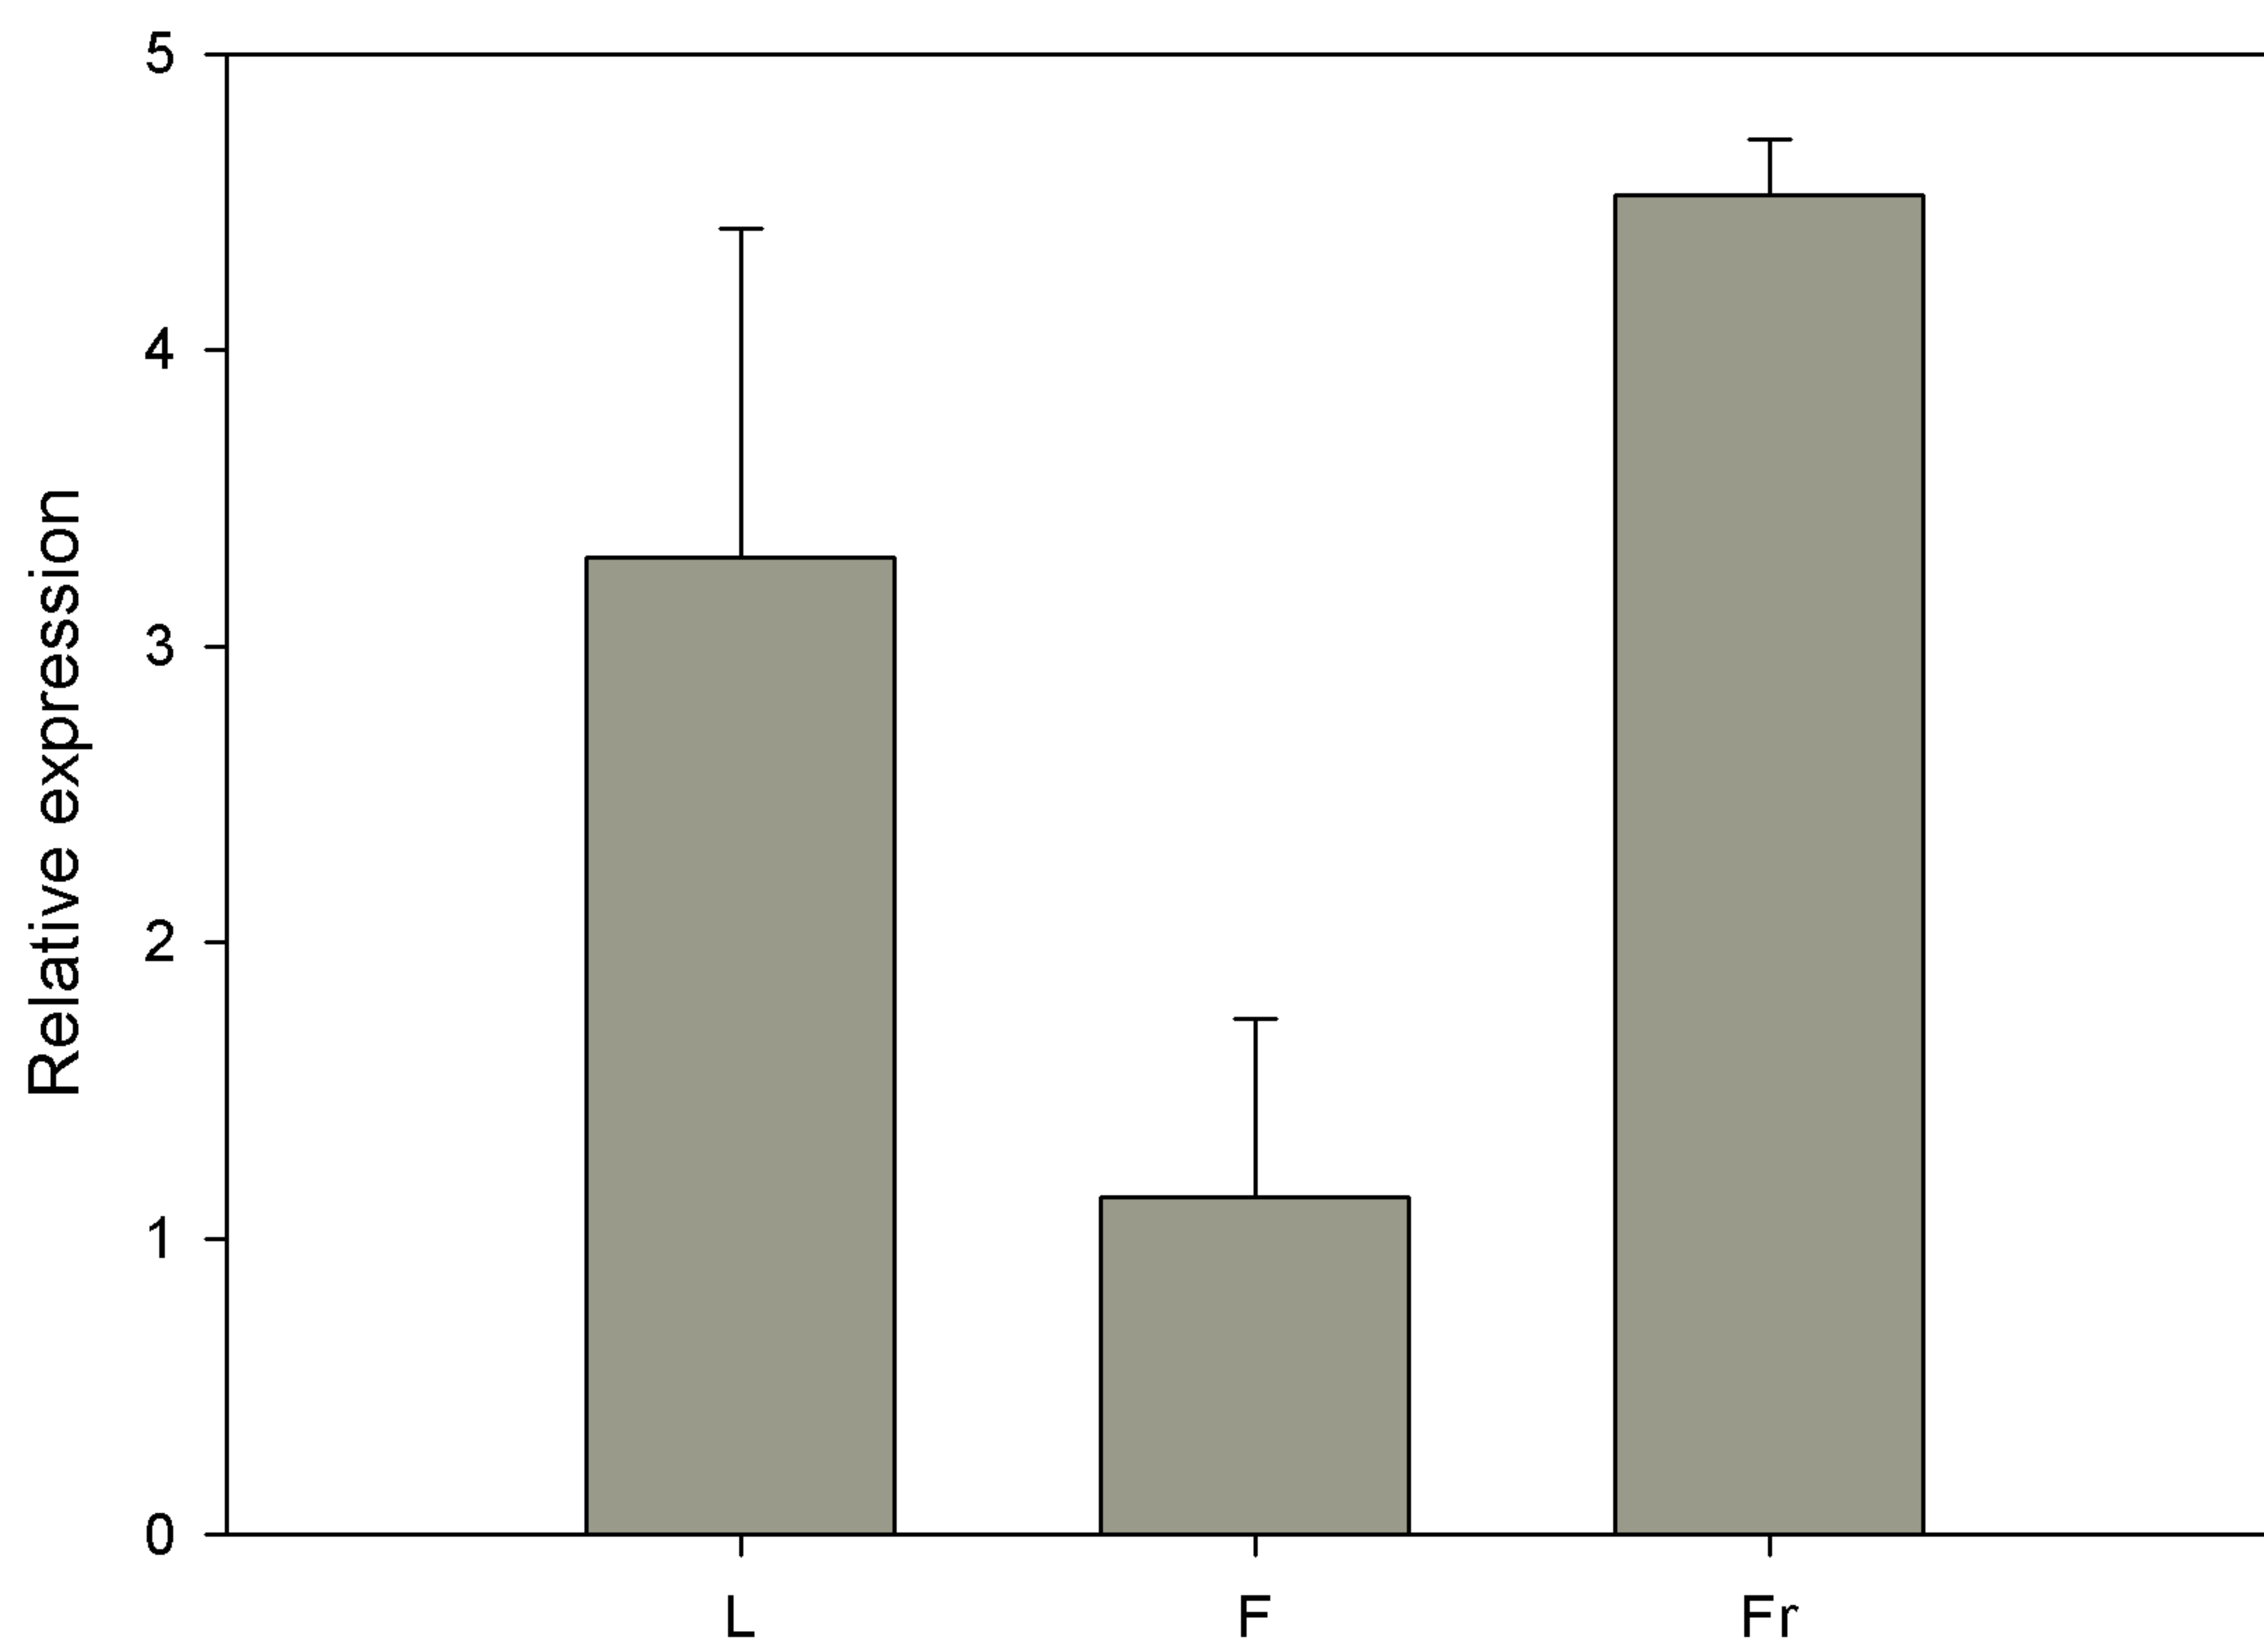

Csi-miR482d-5p.1

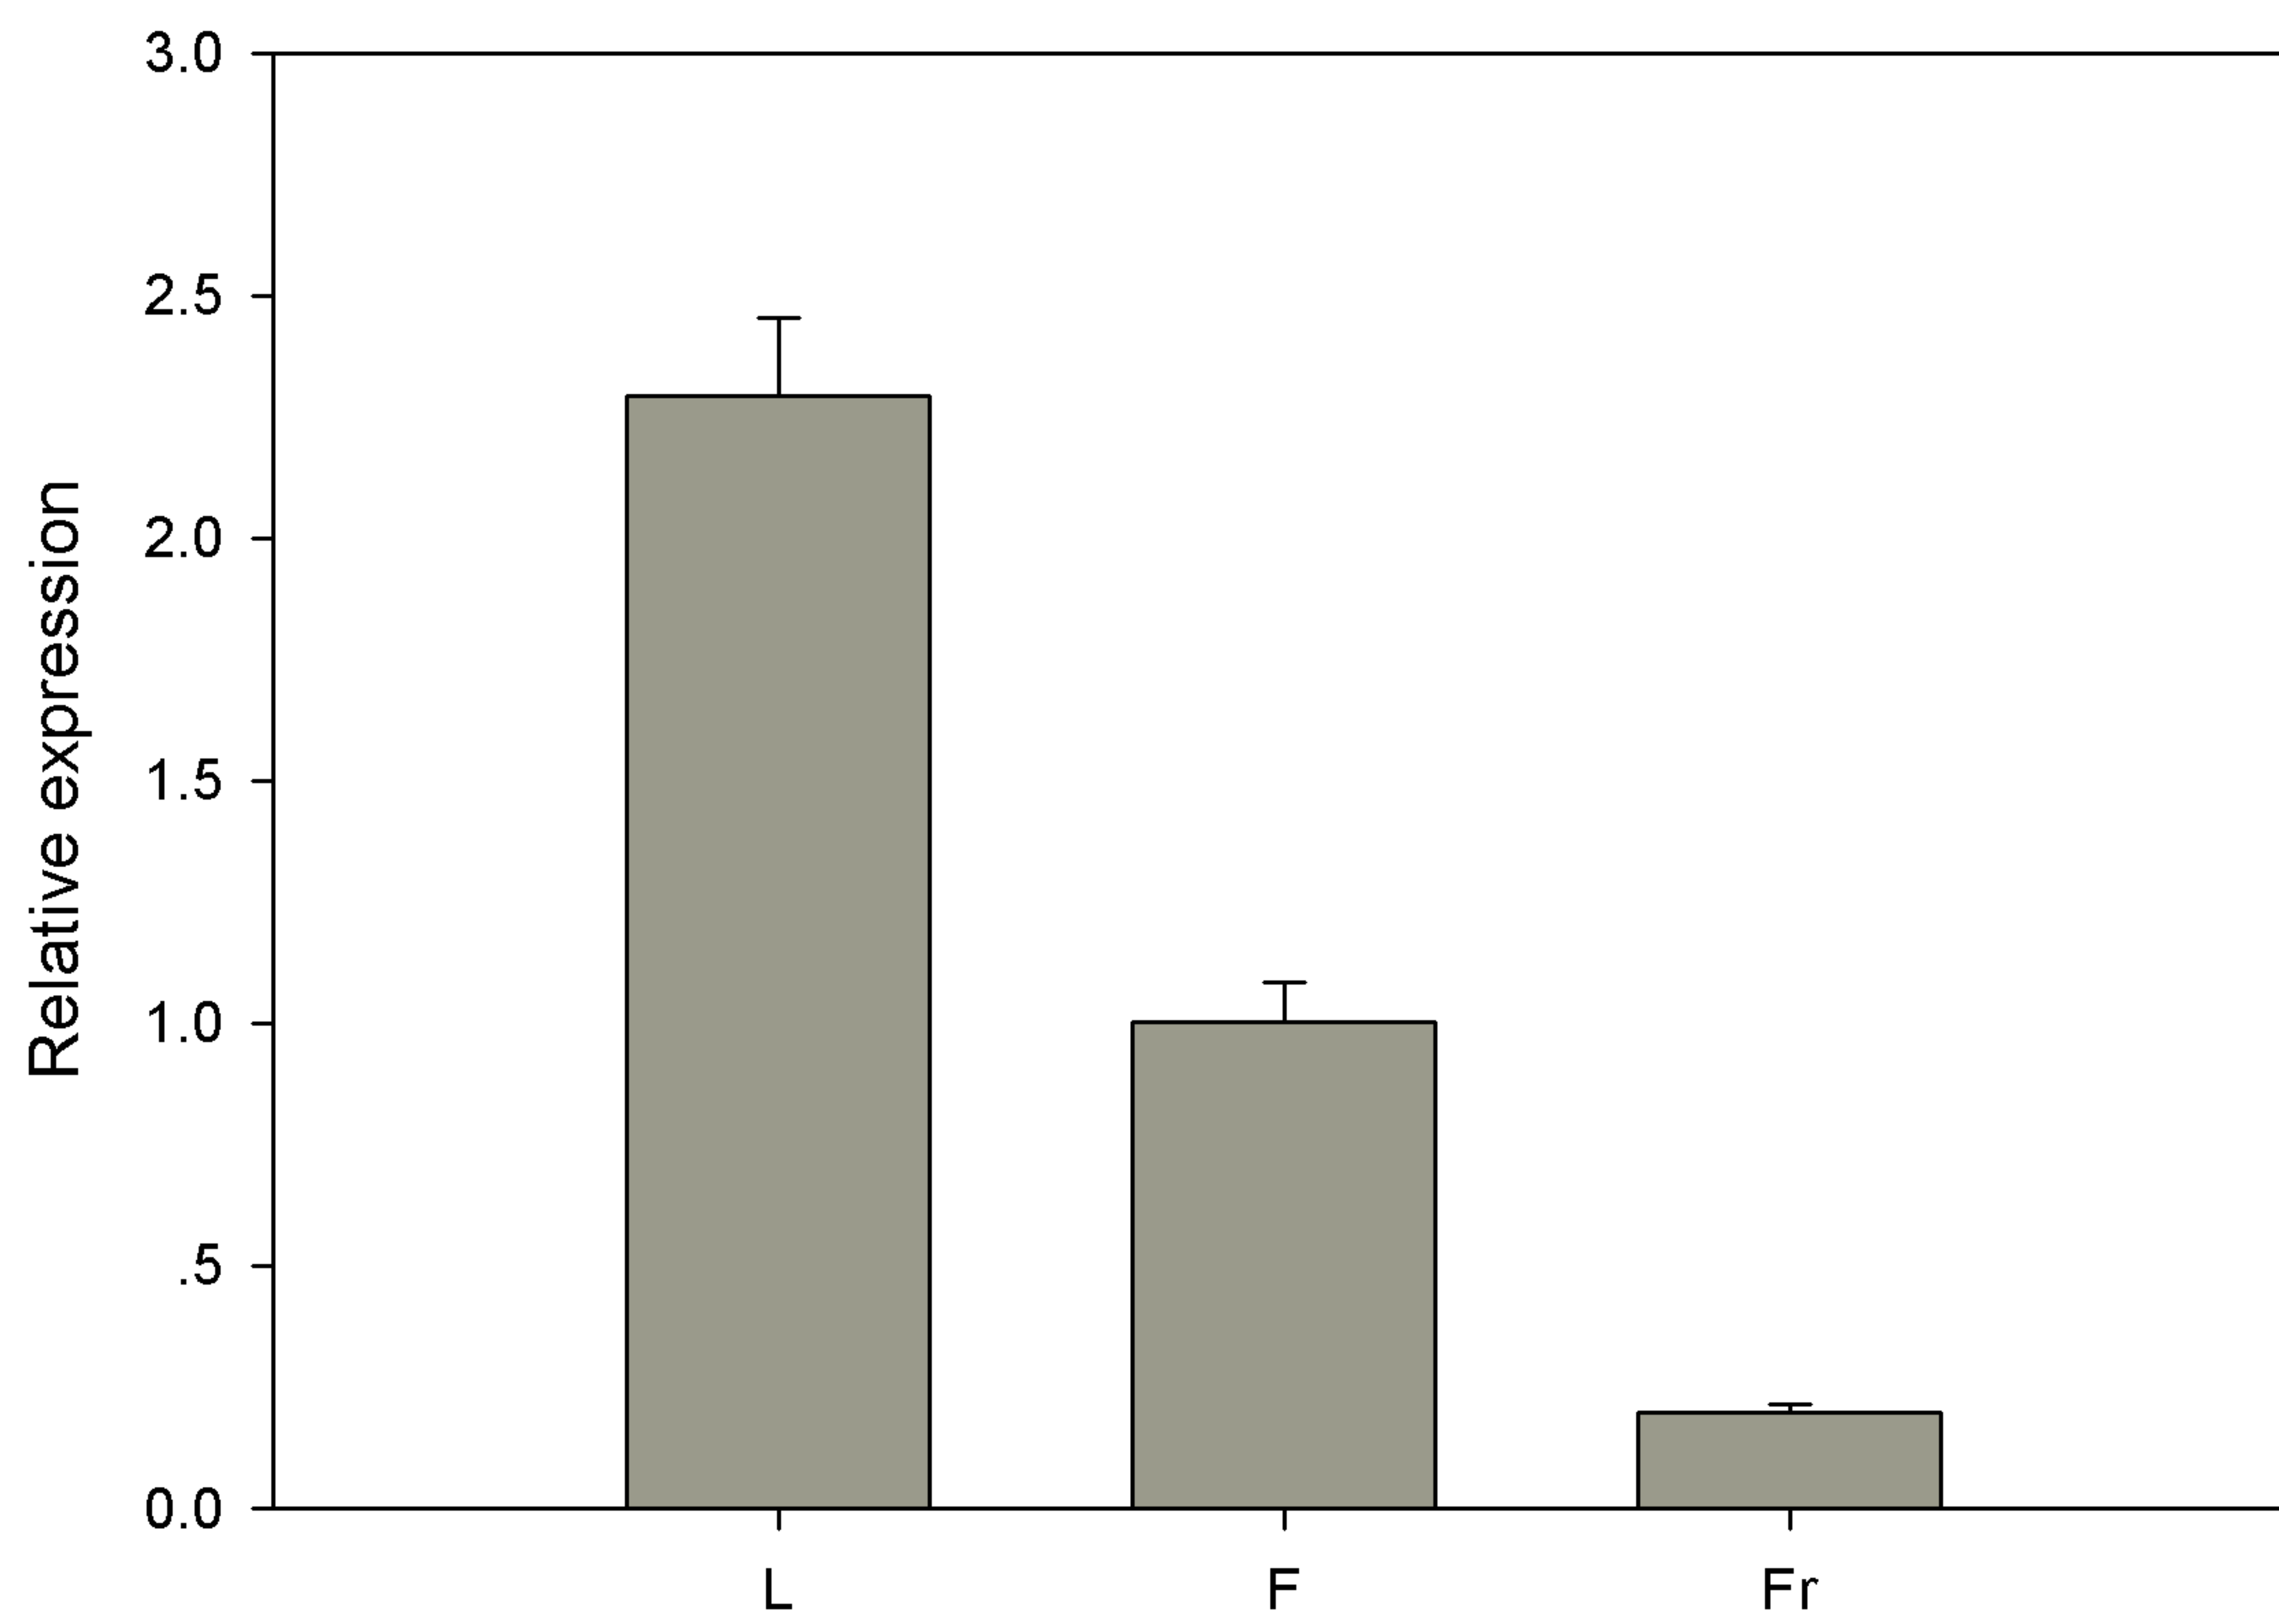

Csi-miR482d-5p.2

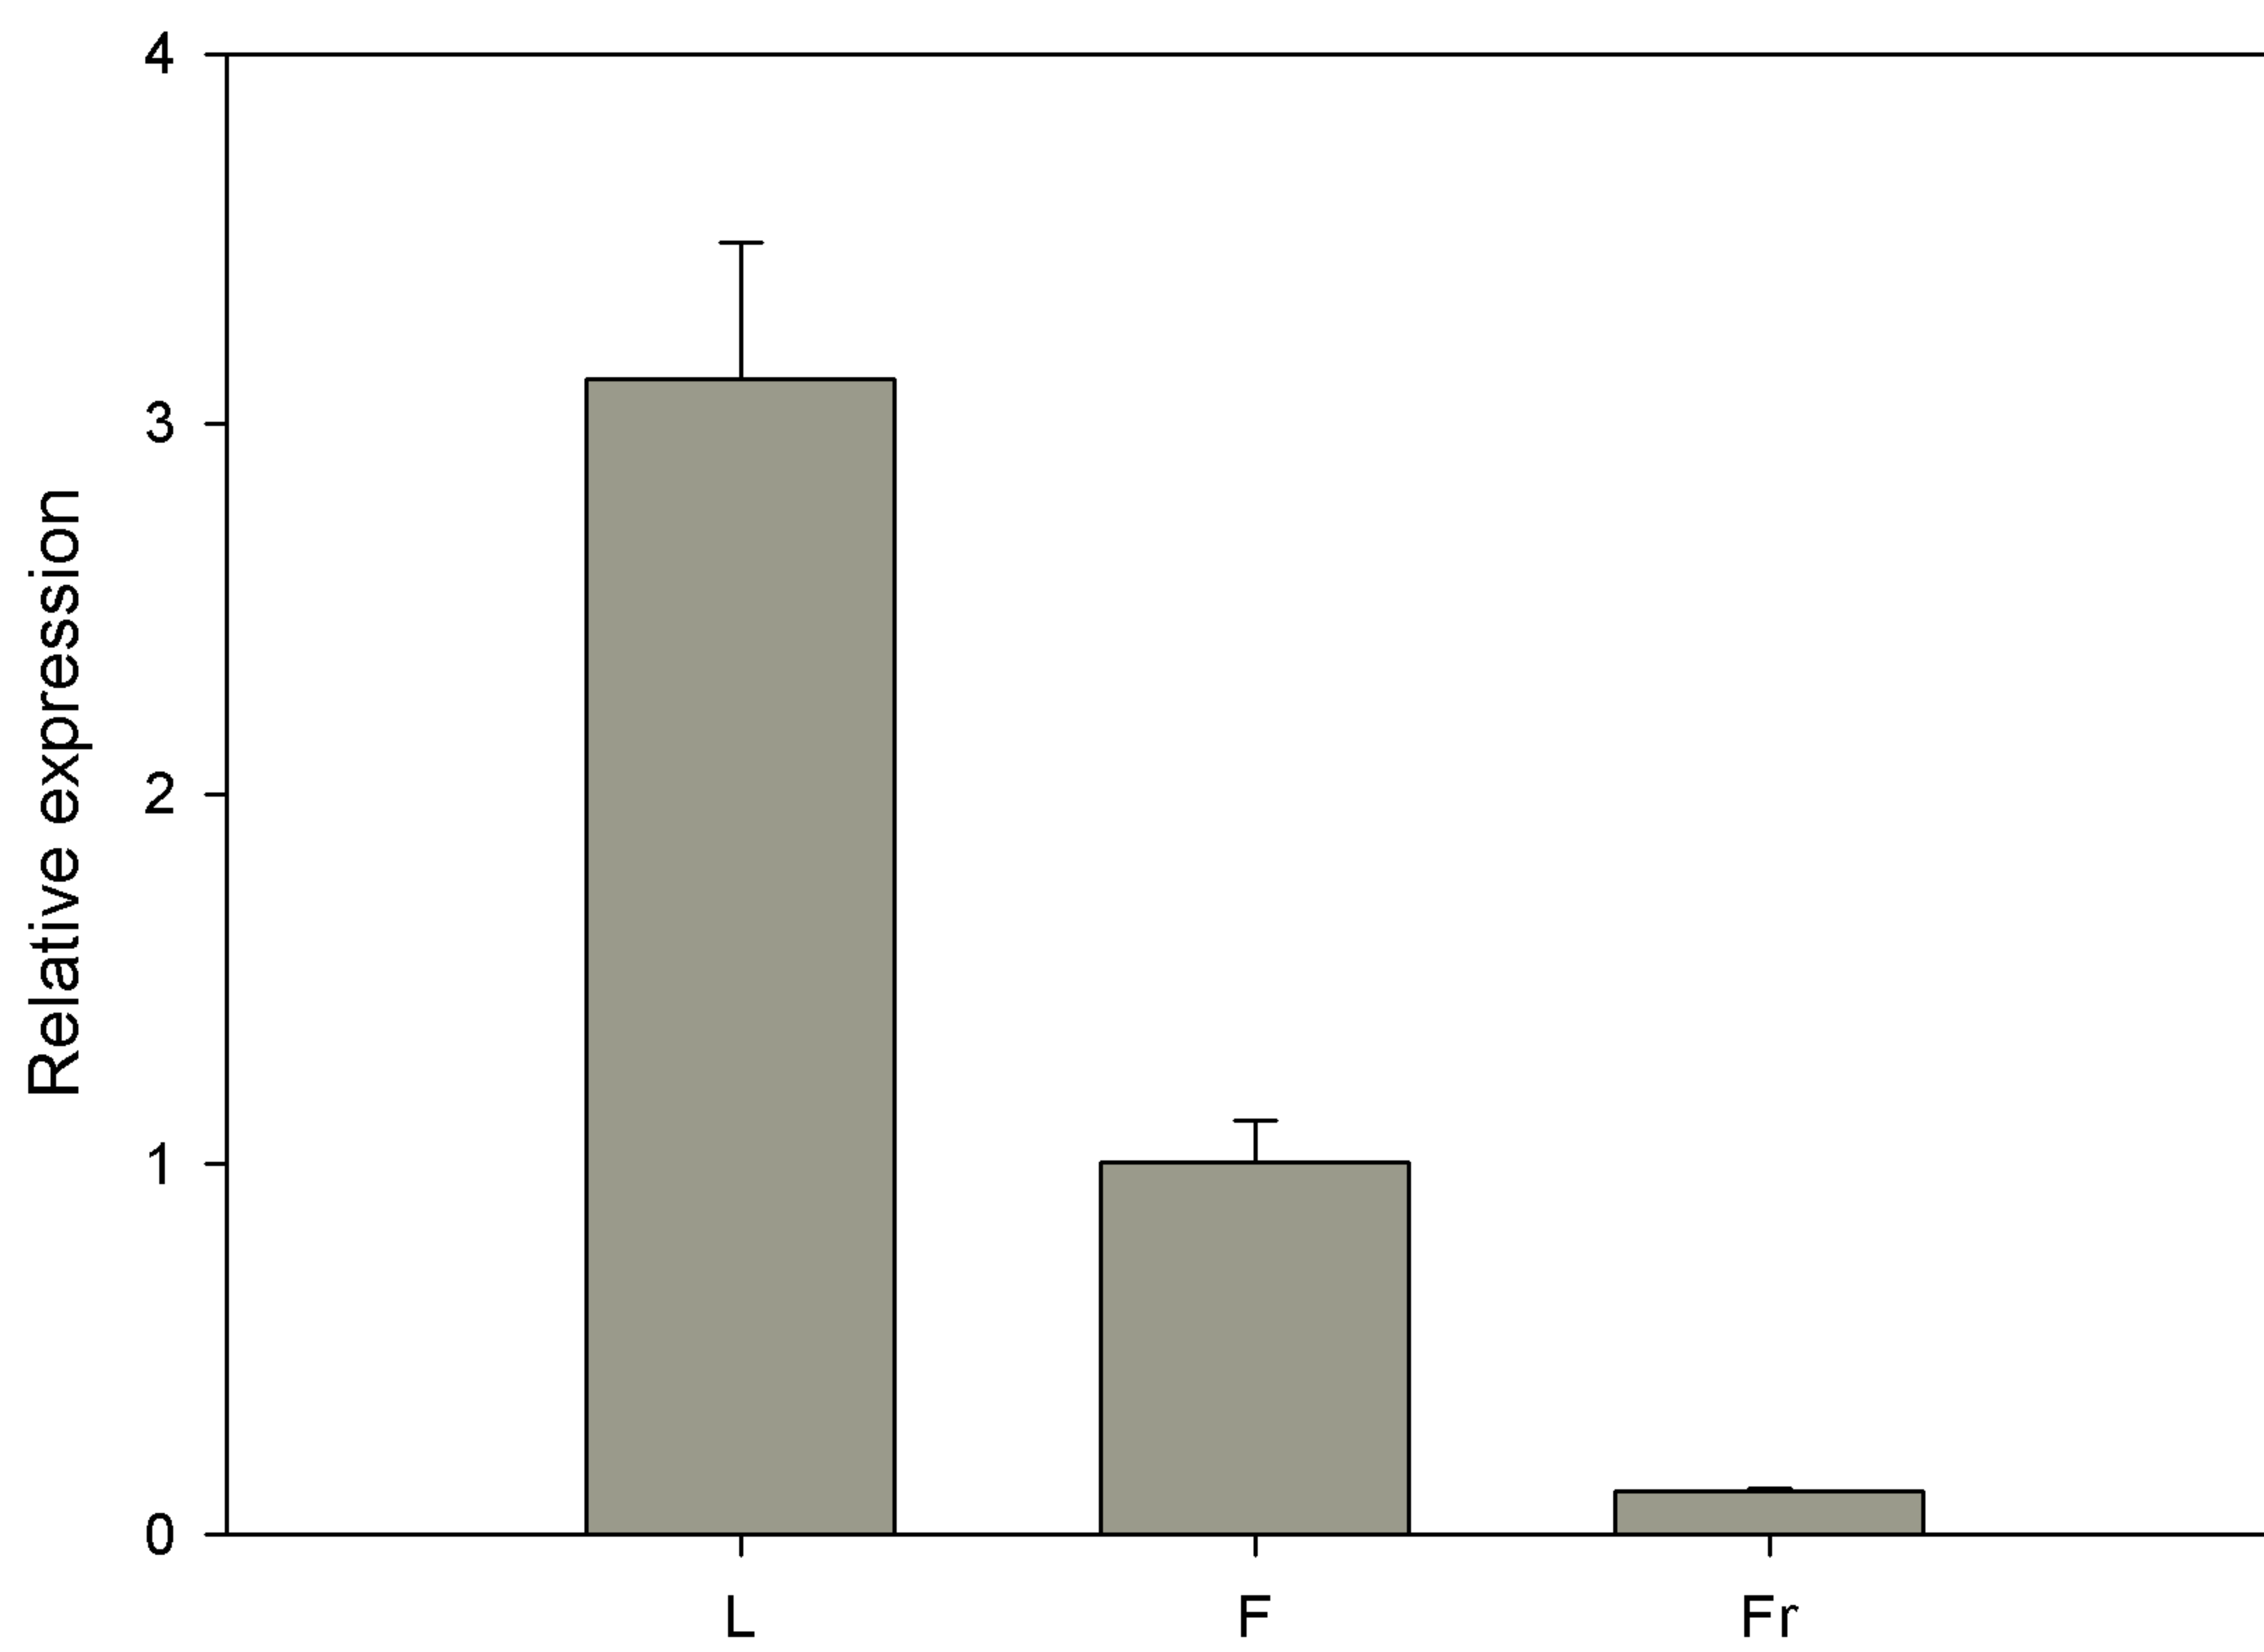

### Csi-miR5179

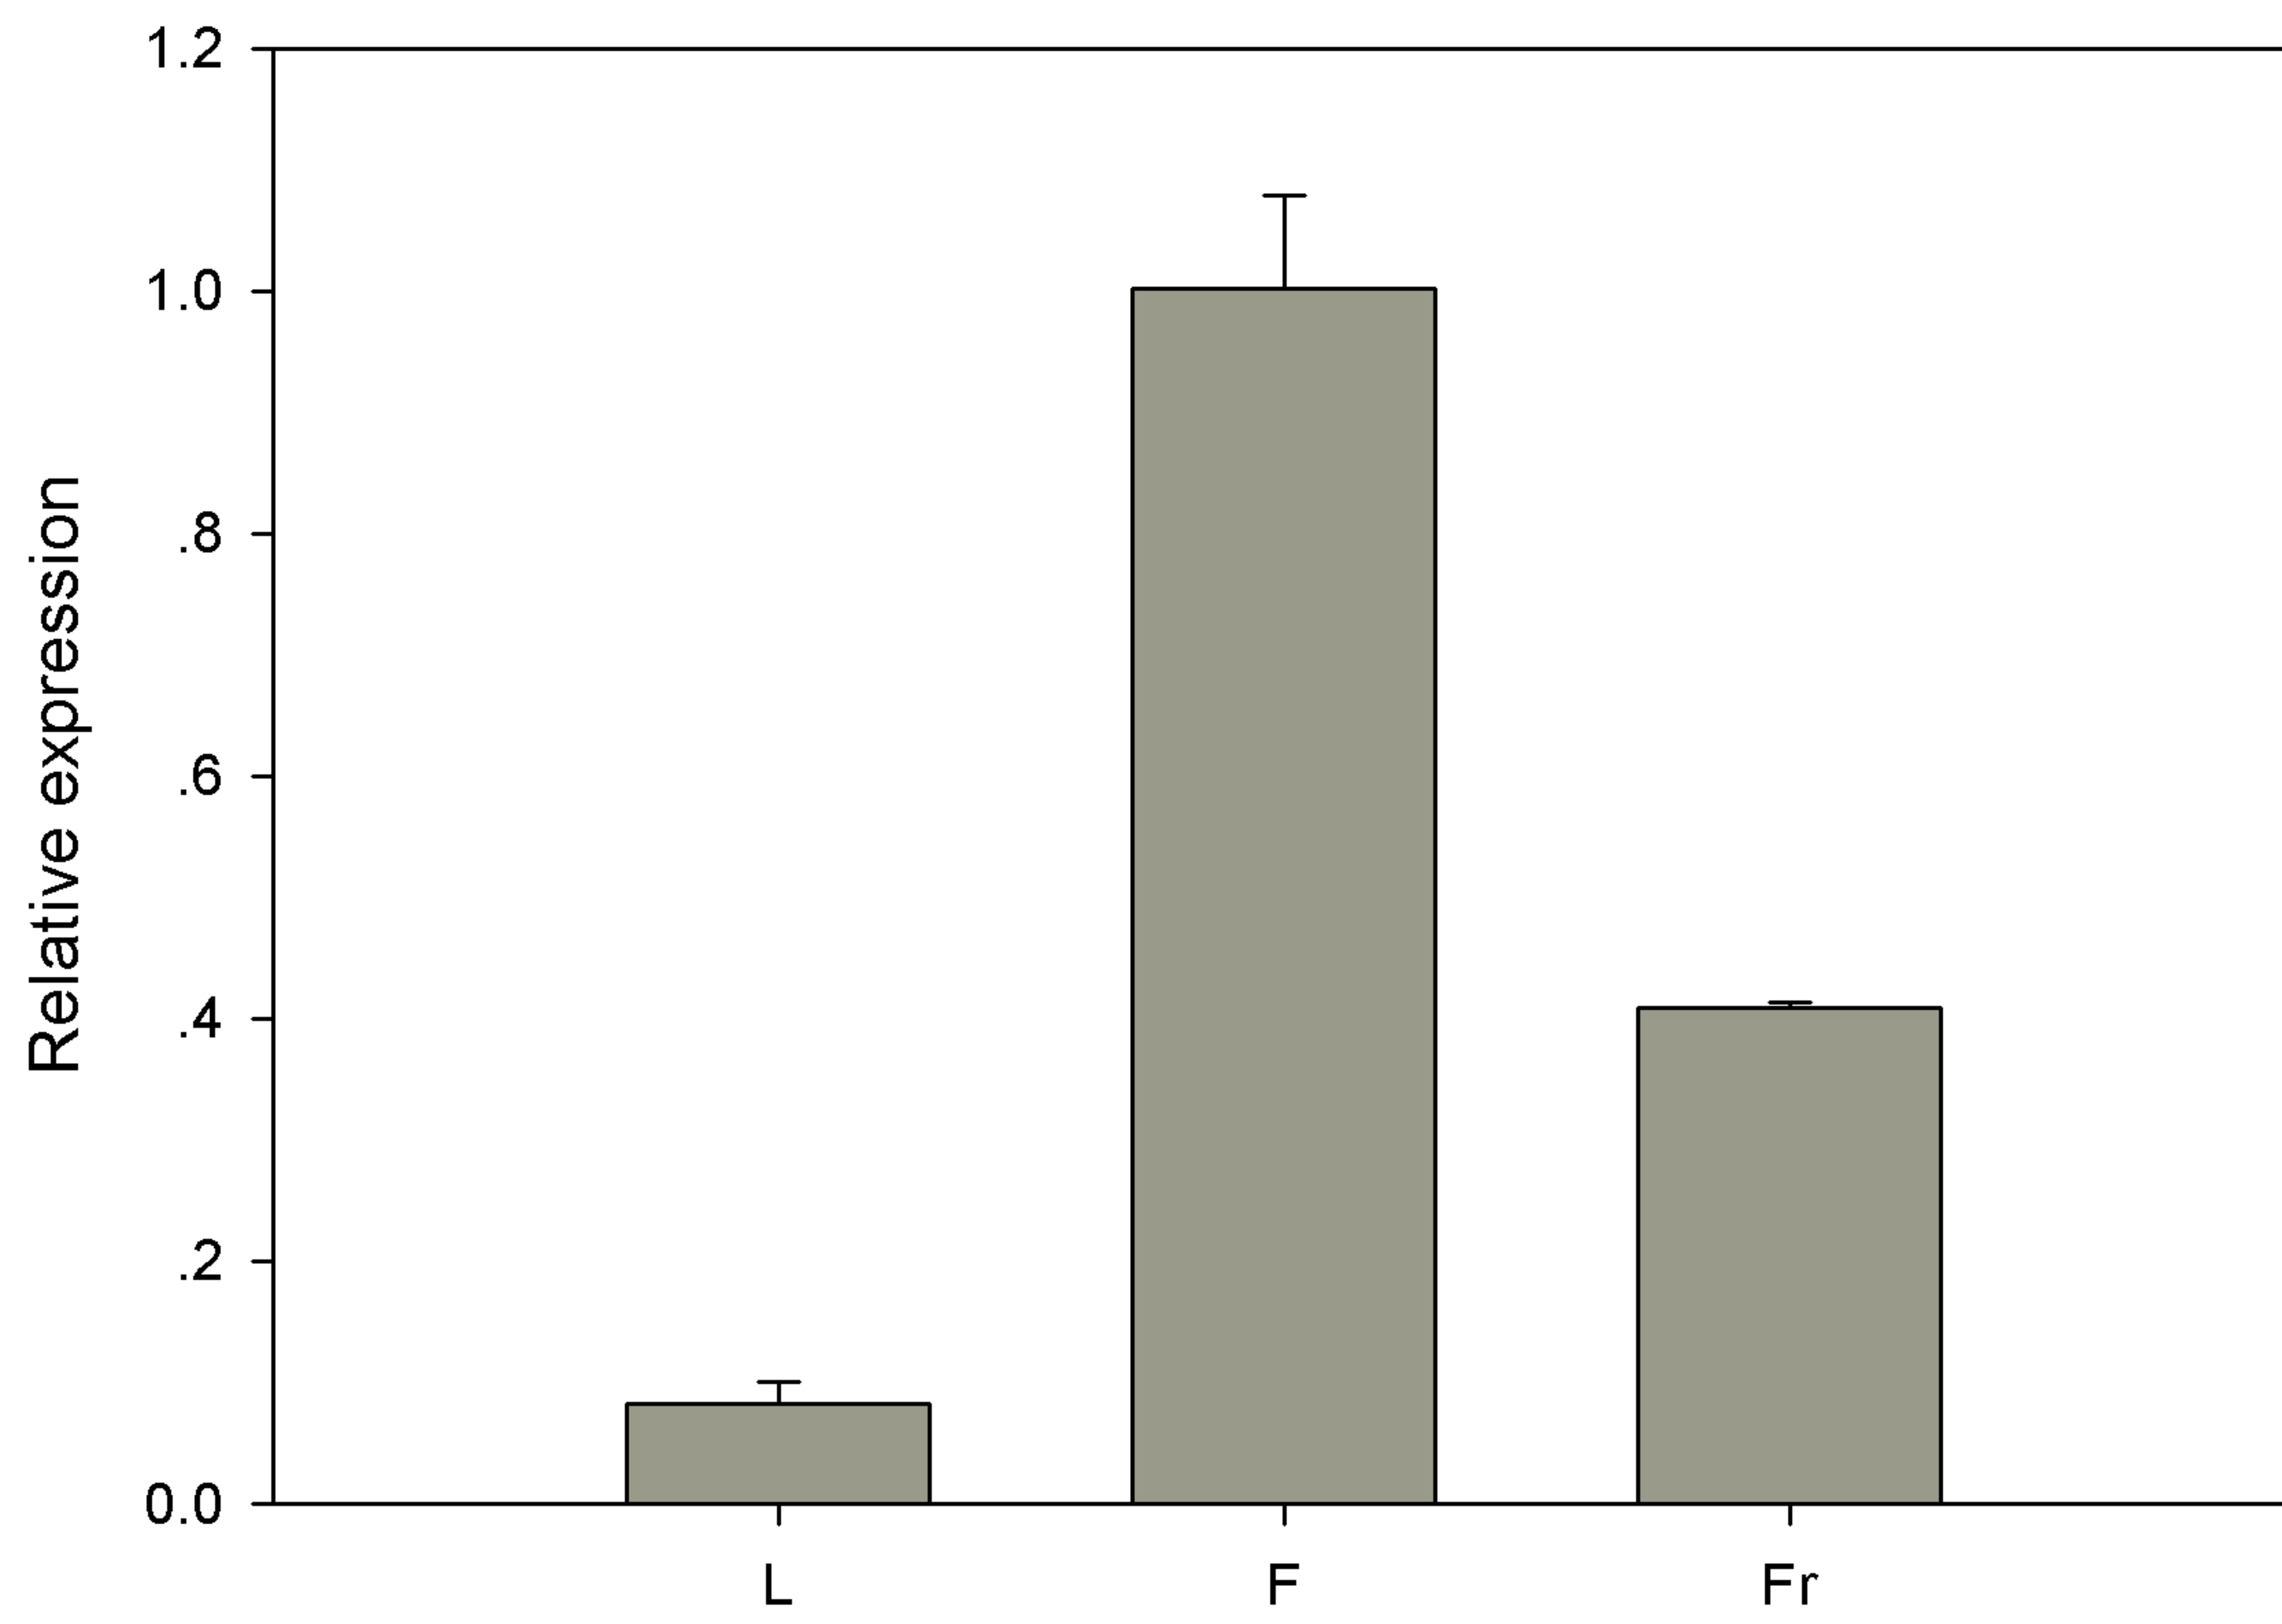

### Csi-miR530b

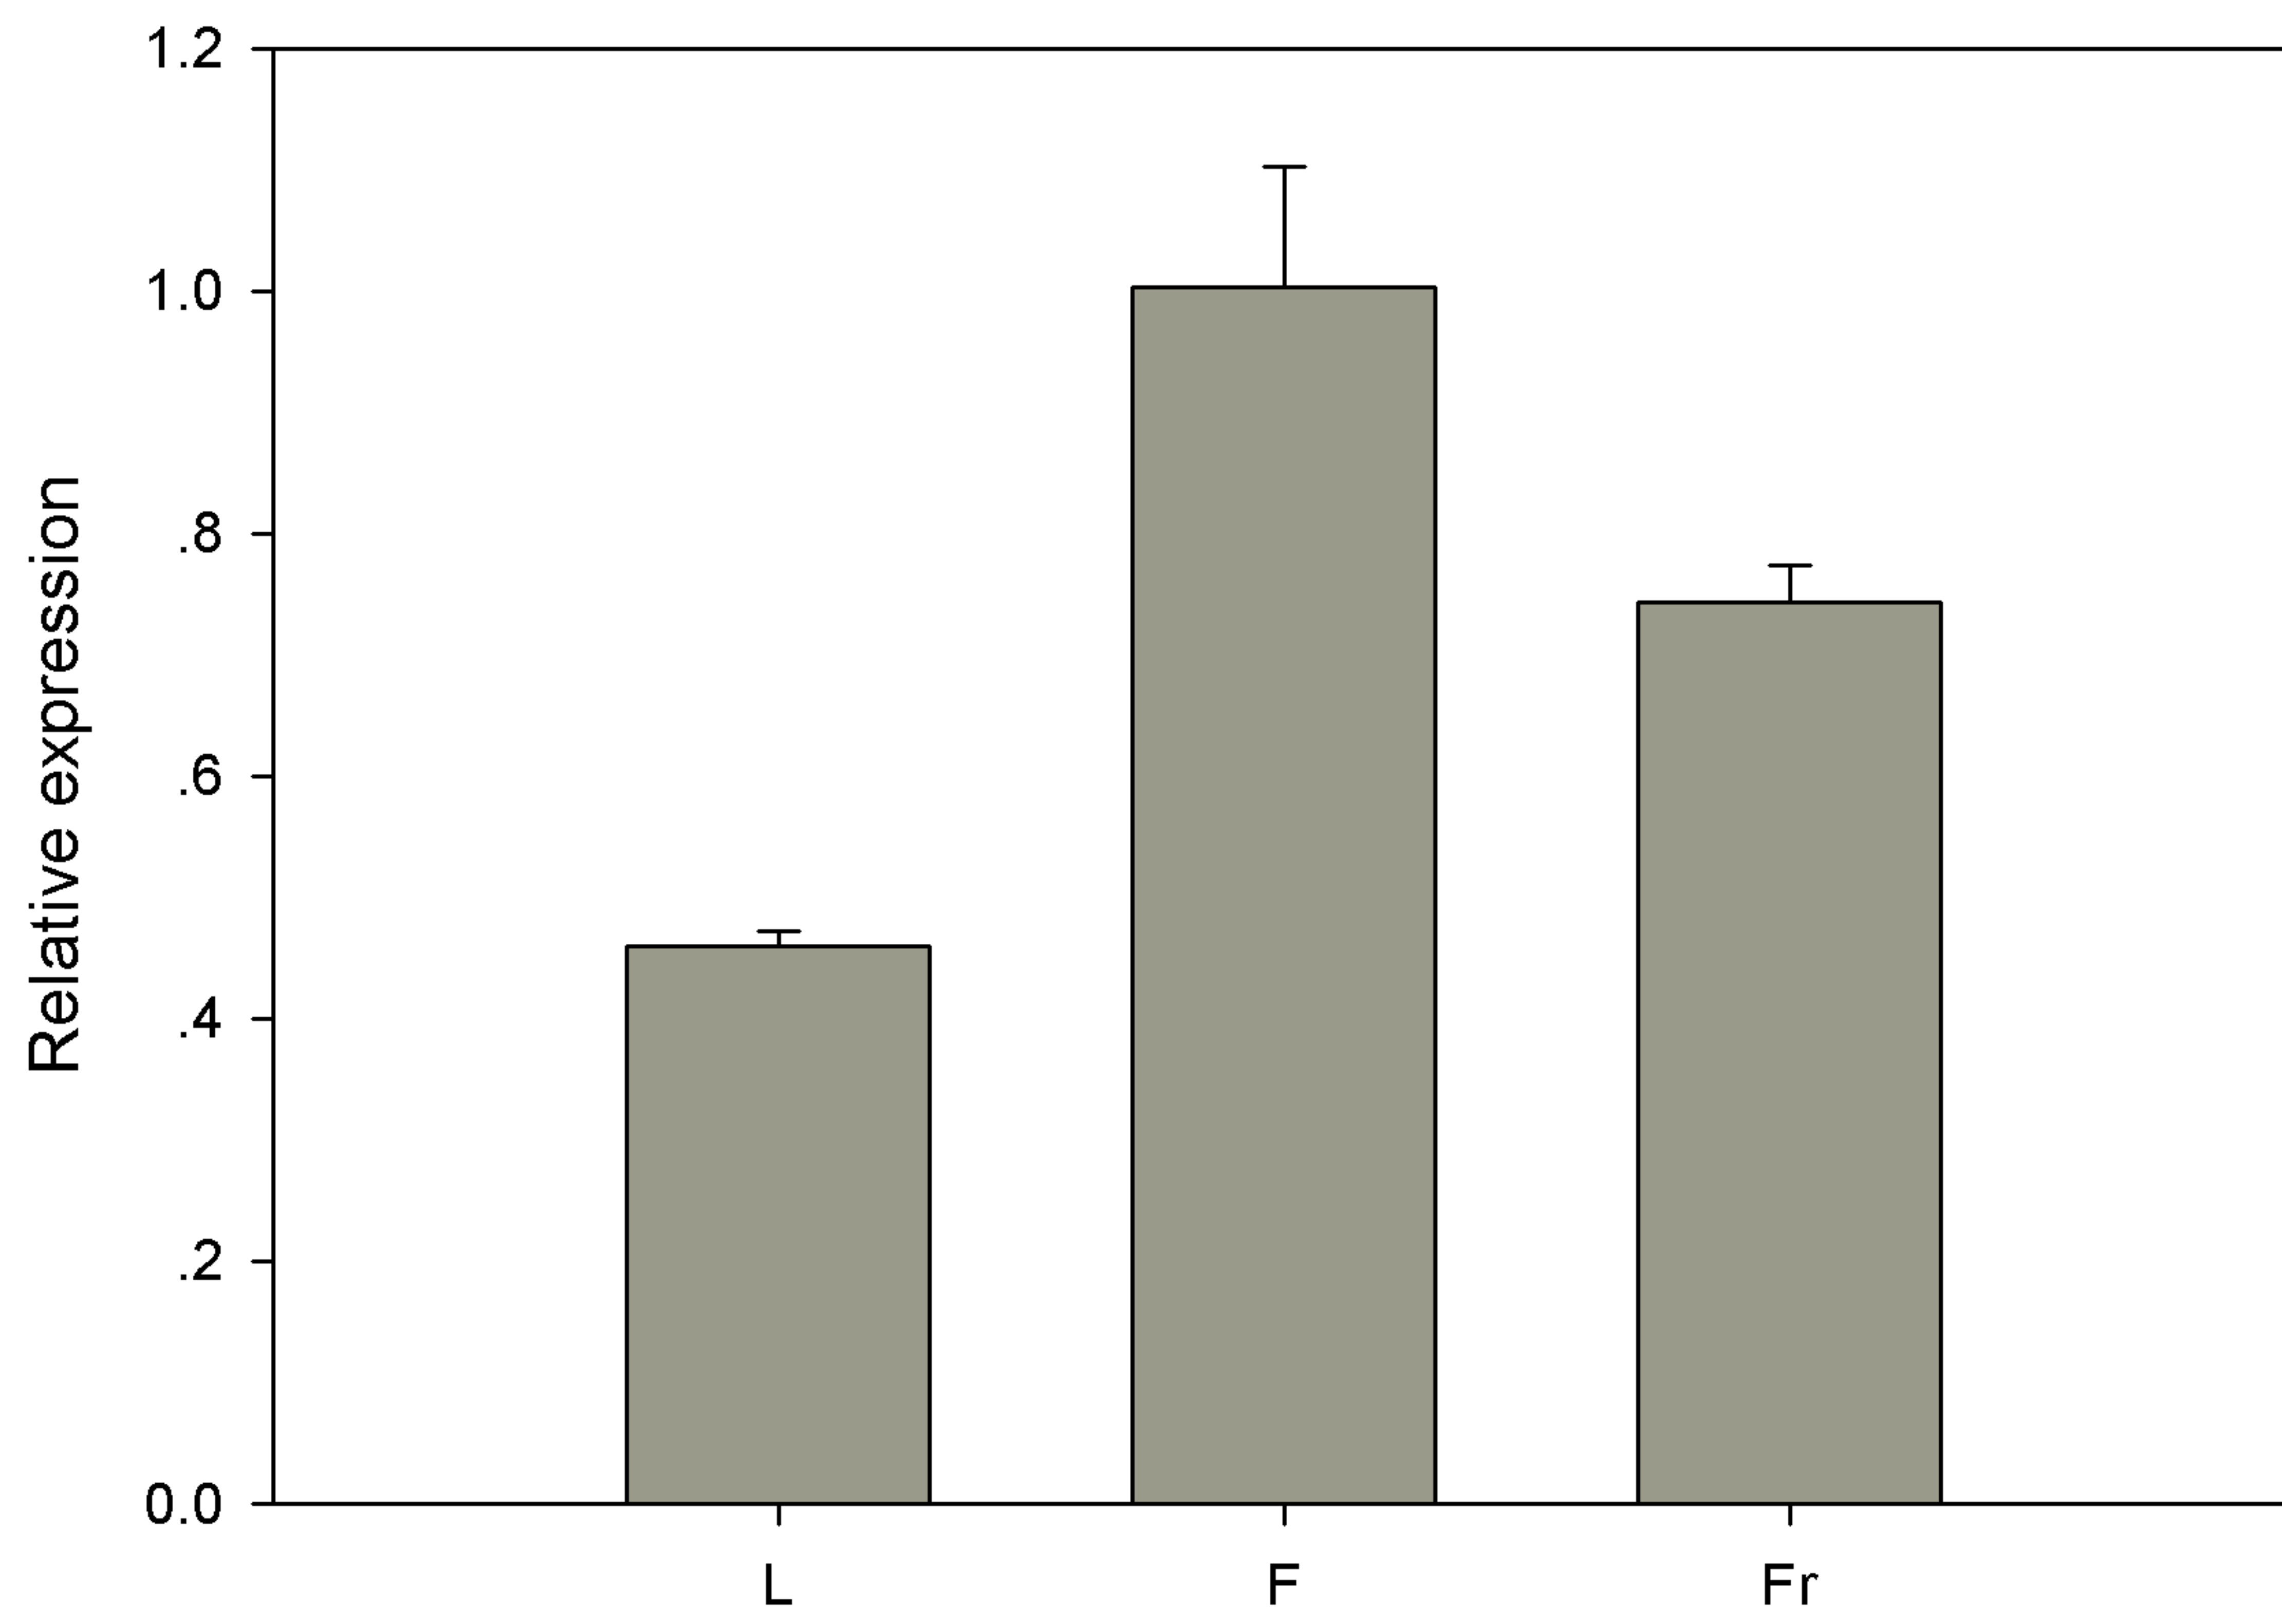

### Csi-miR535.1

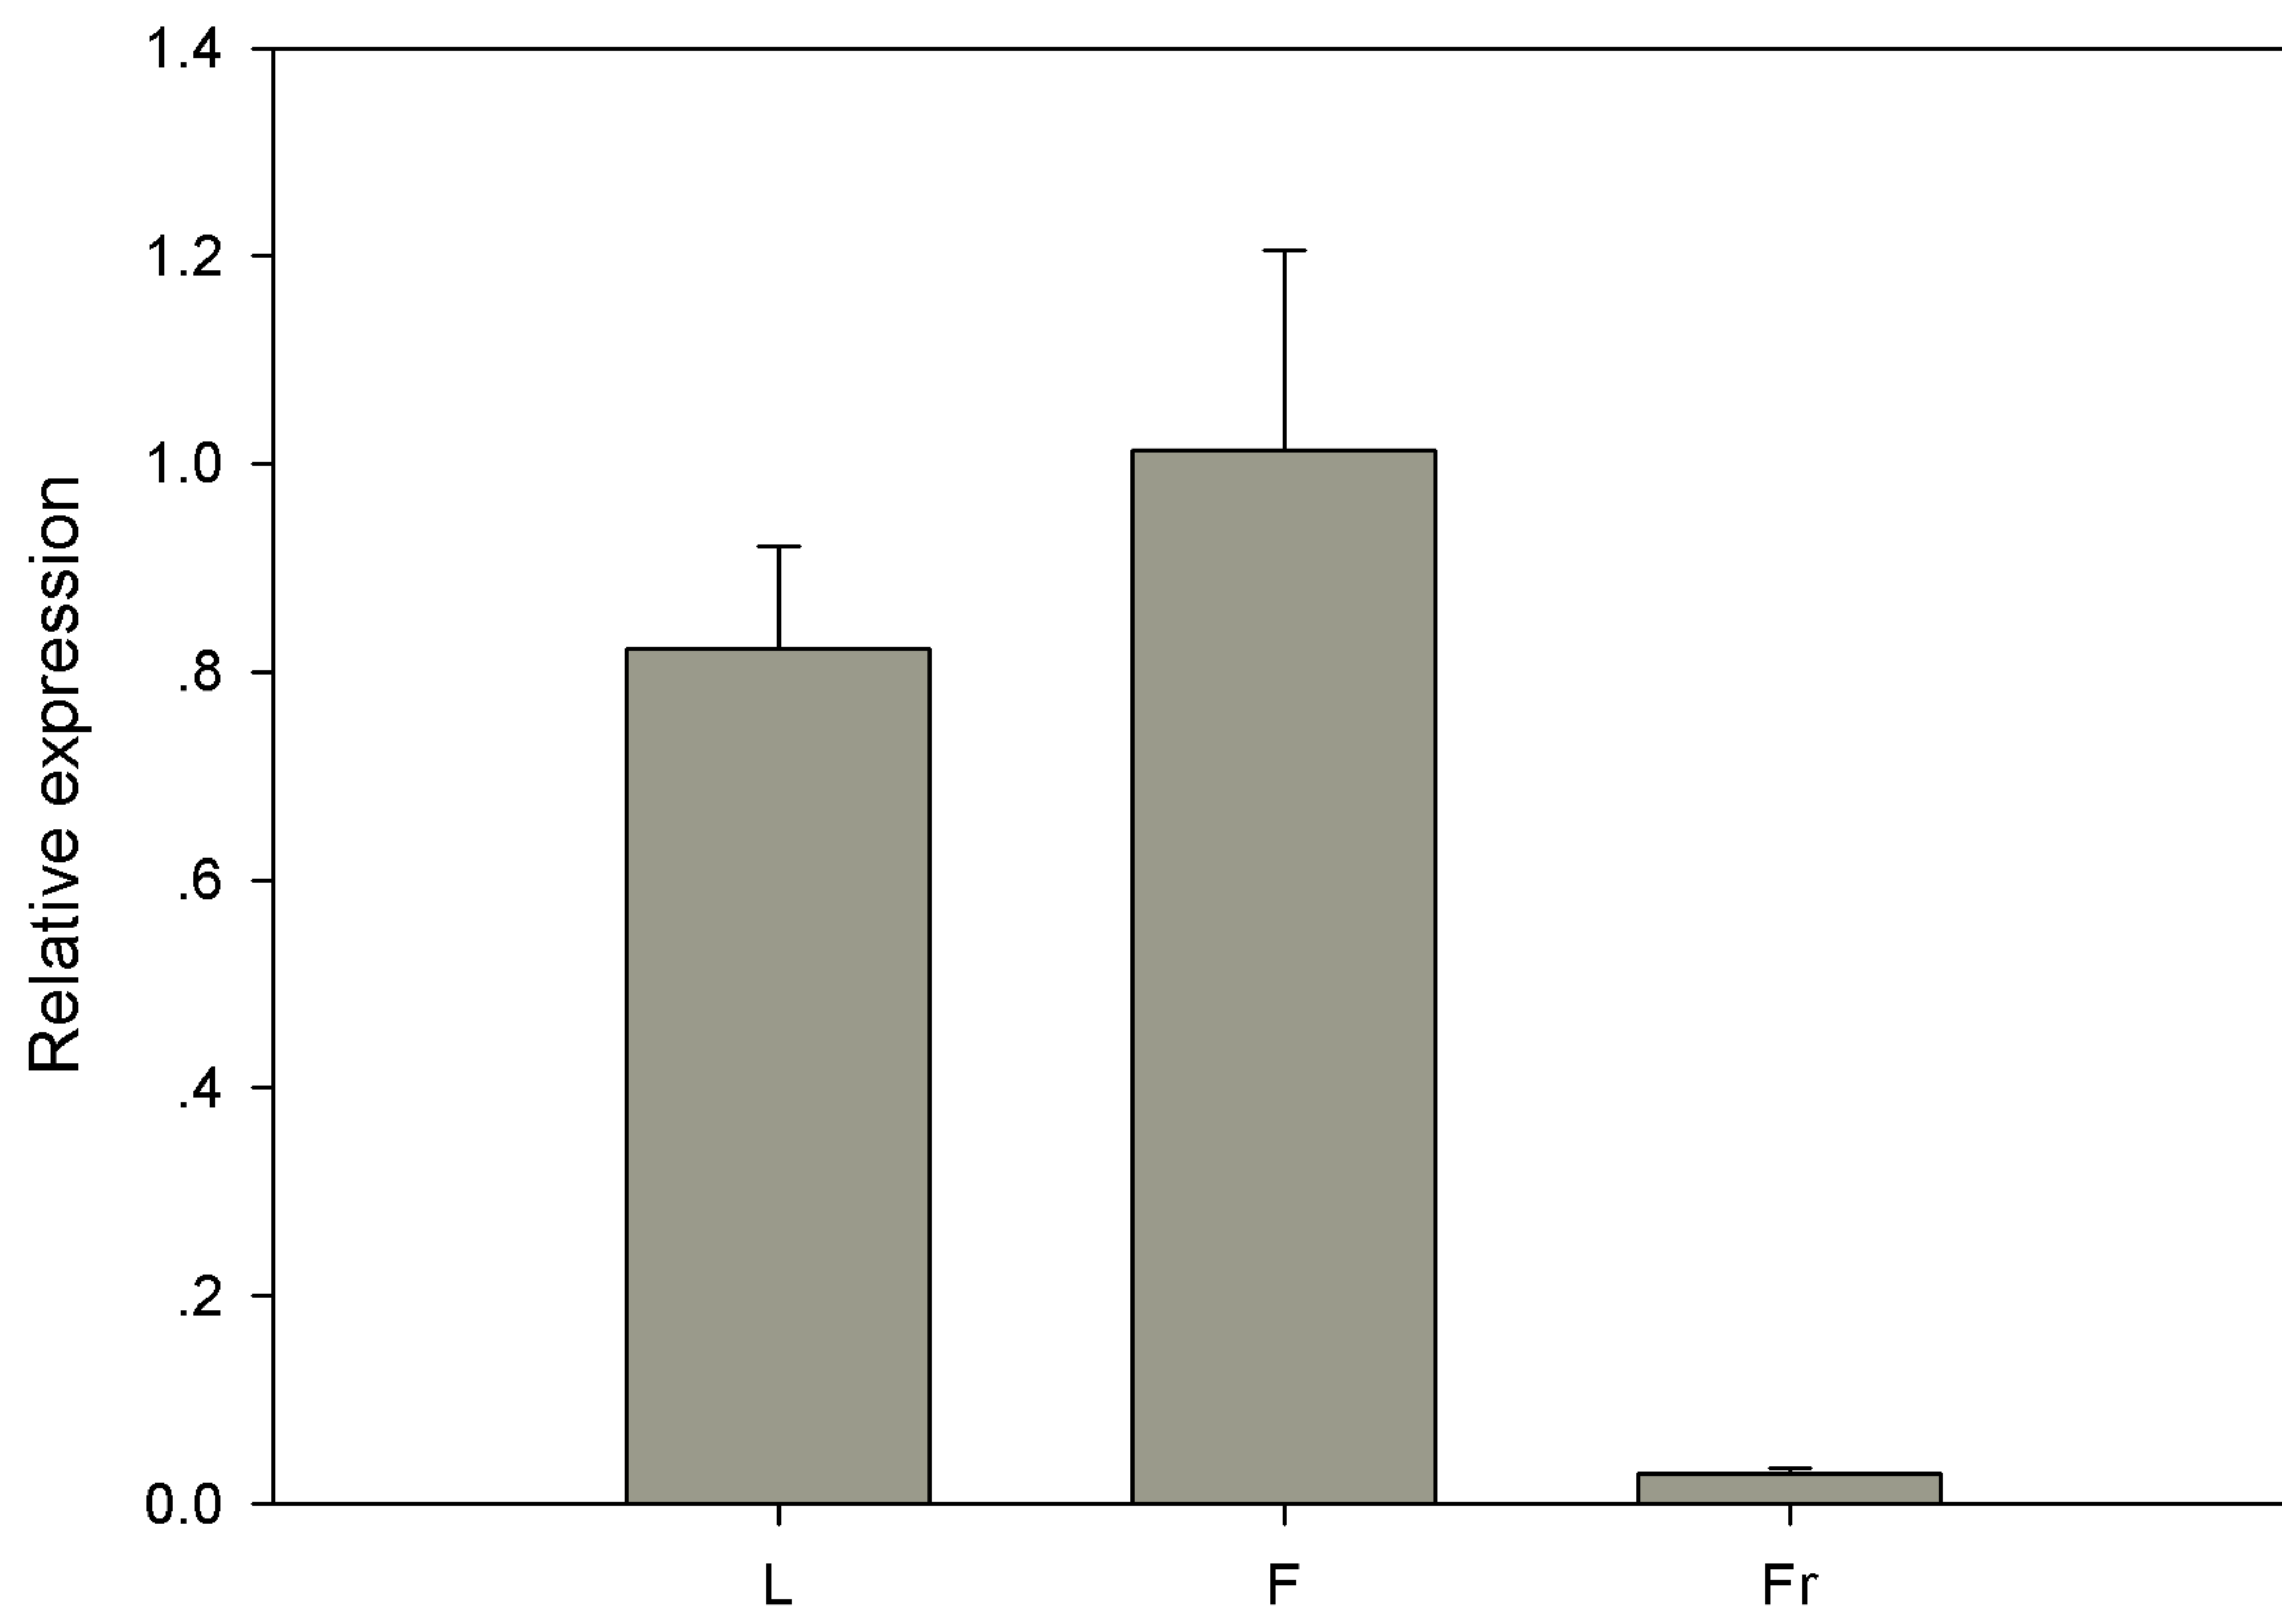

### Csi-miR536-3p

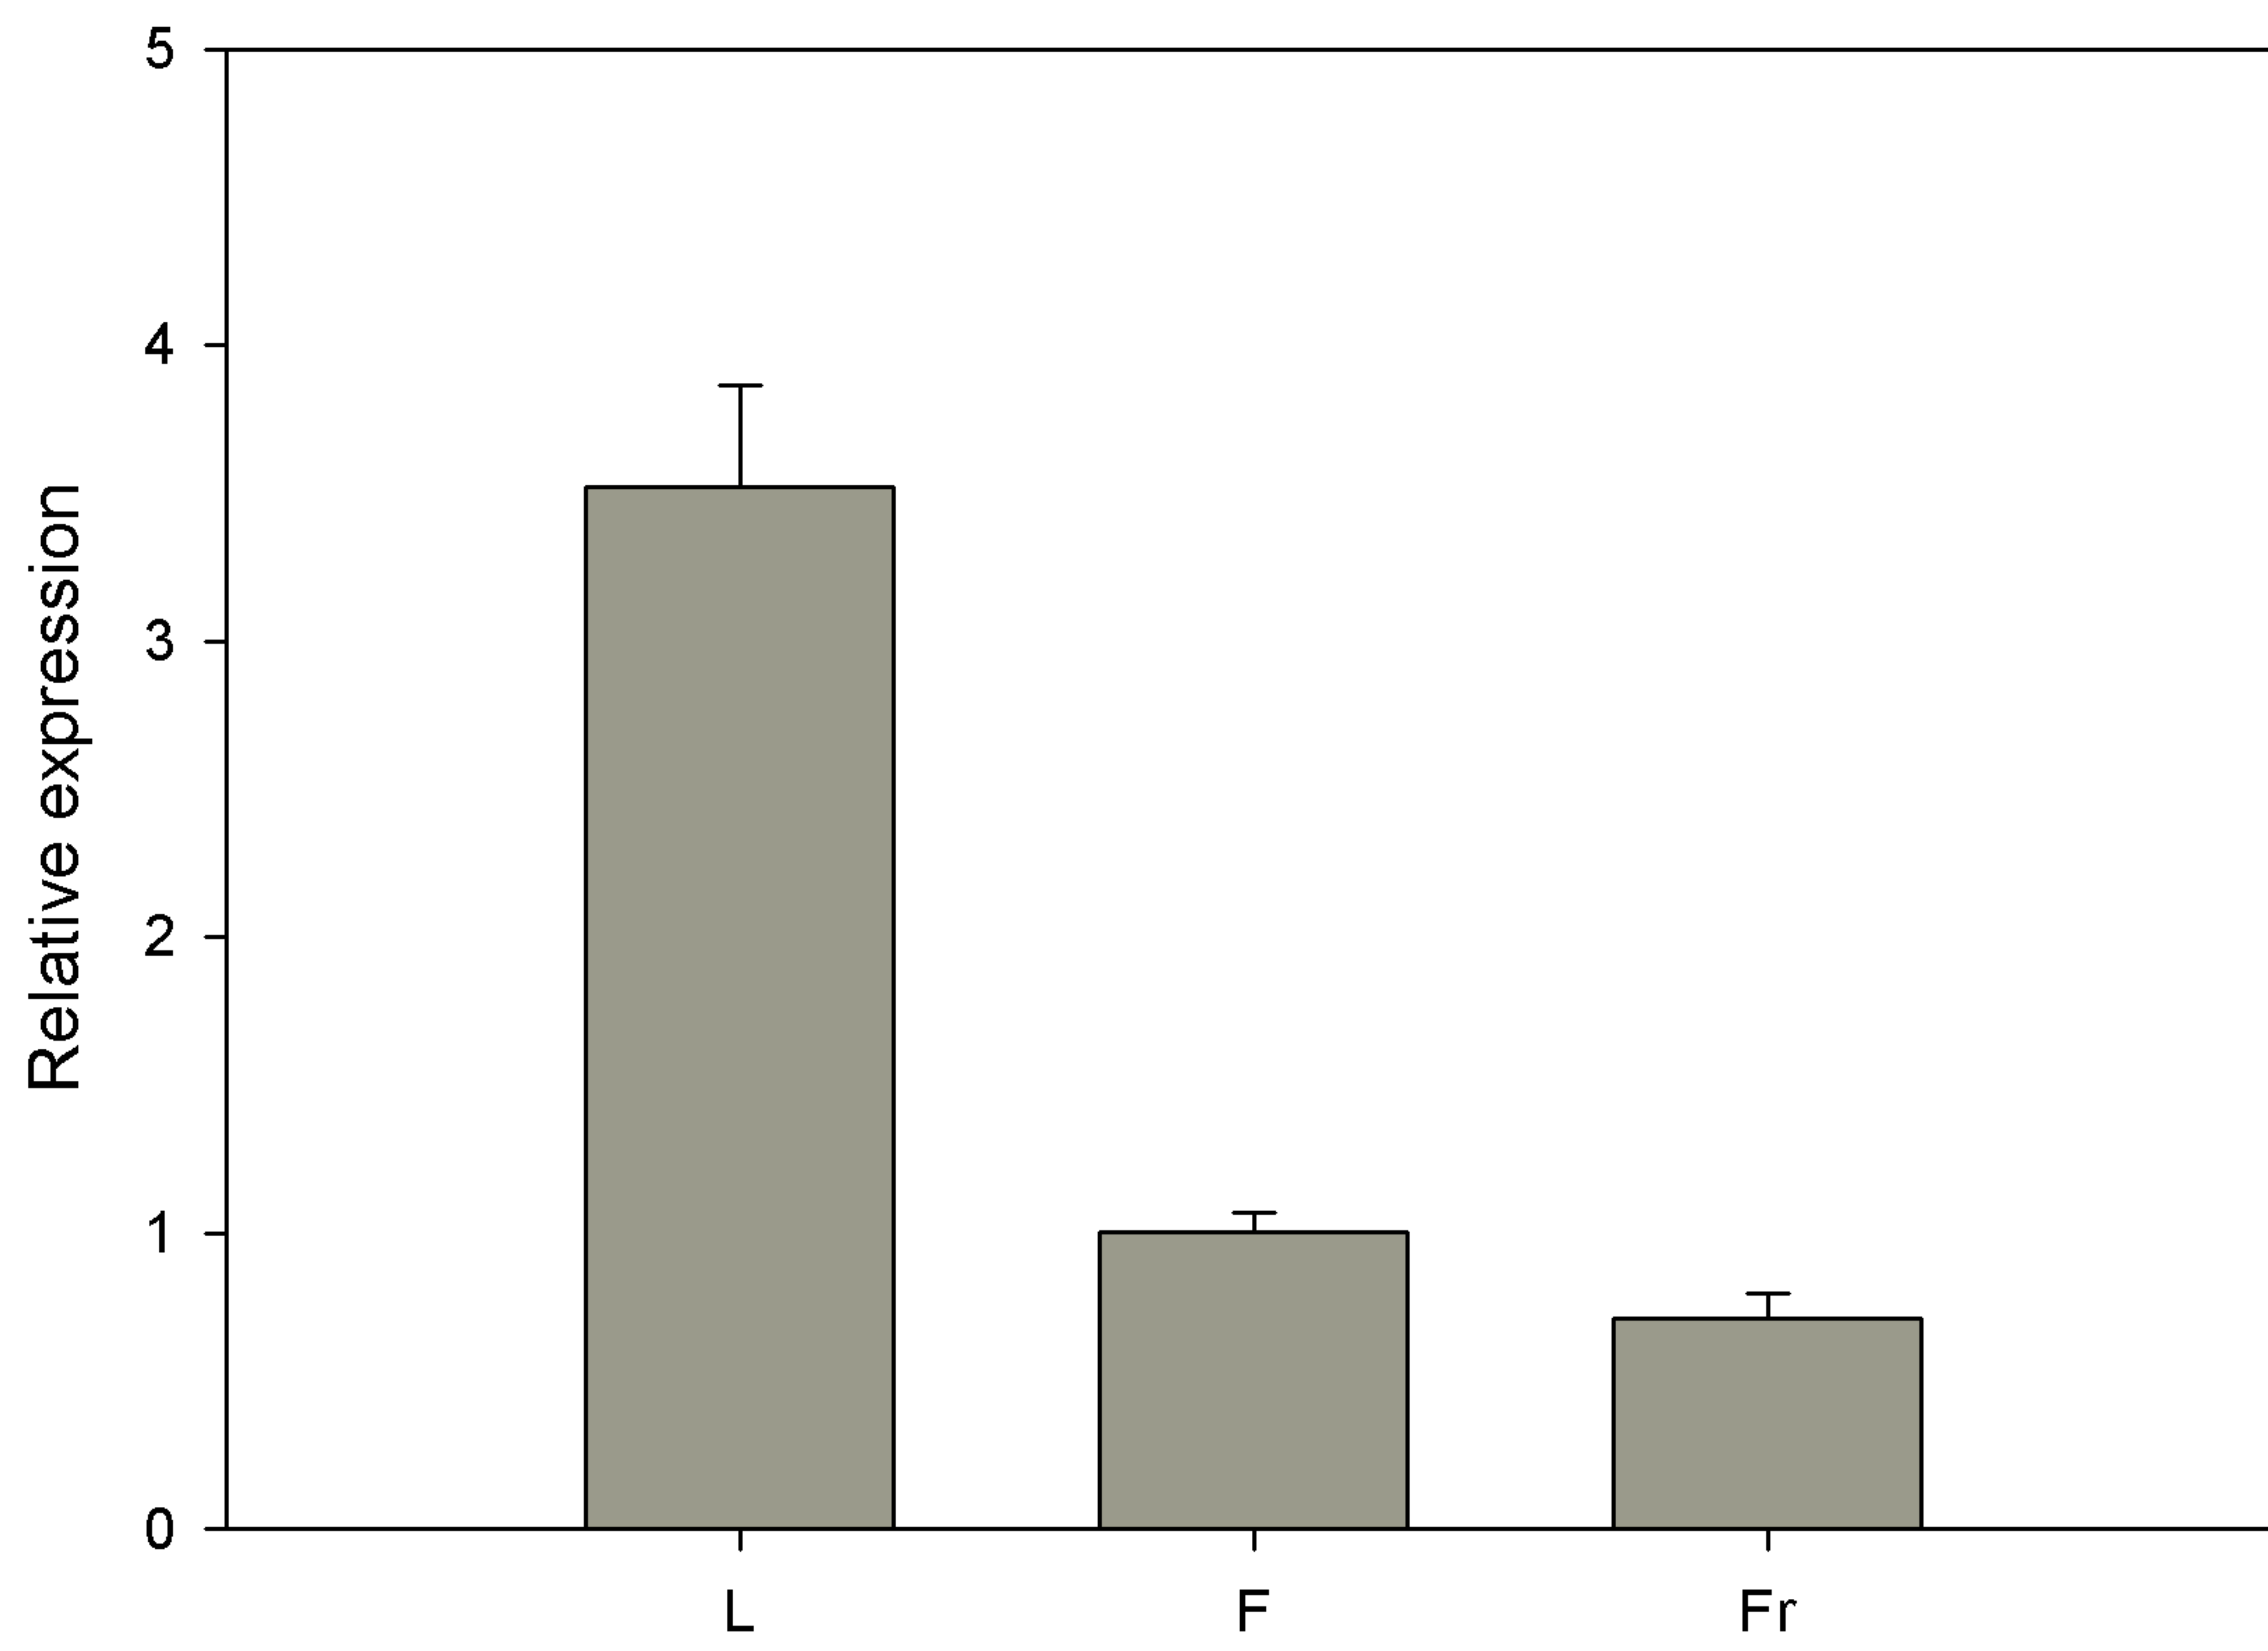

### Csi-miR814

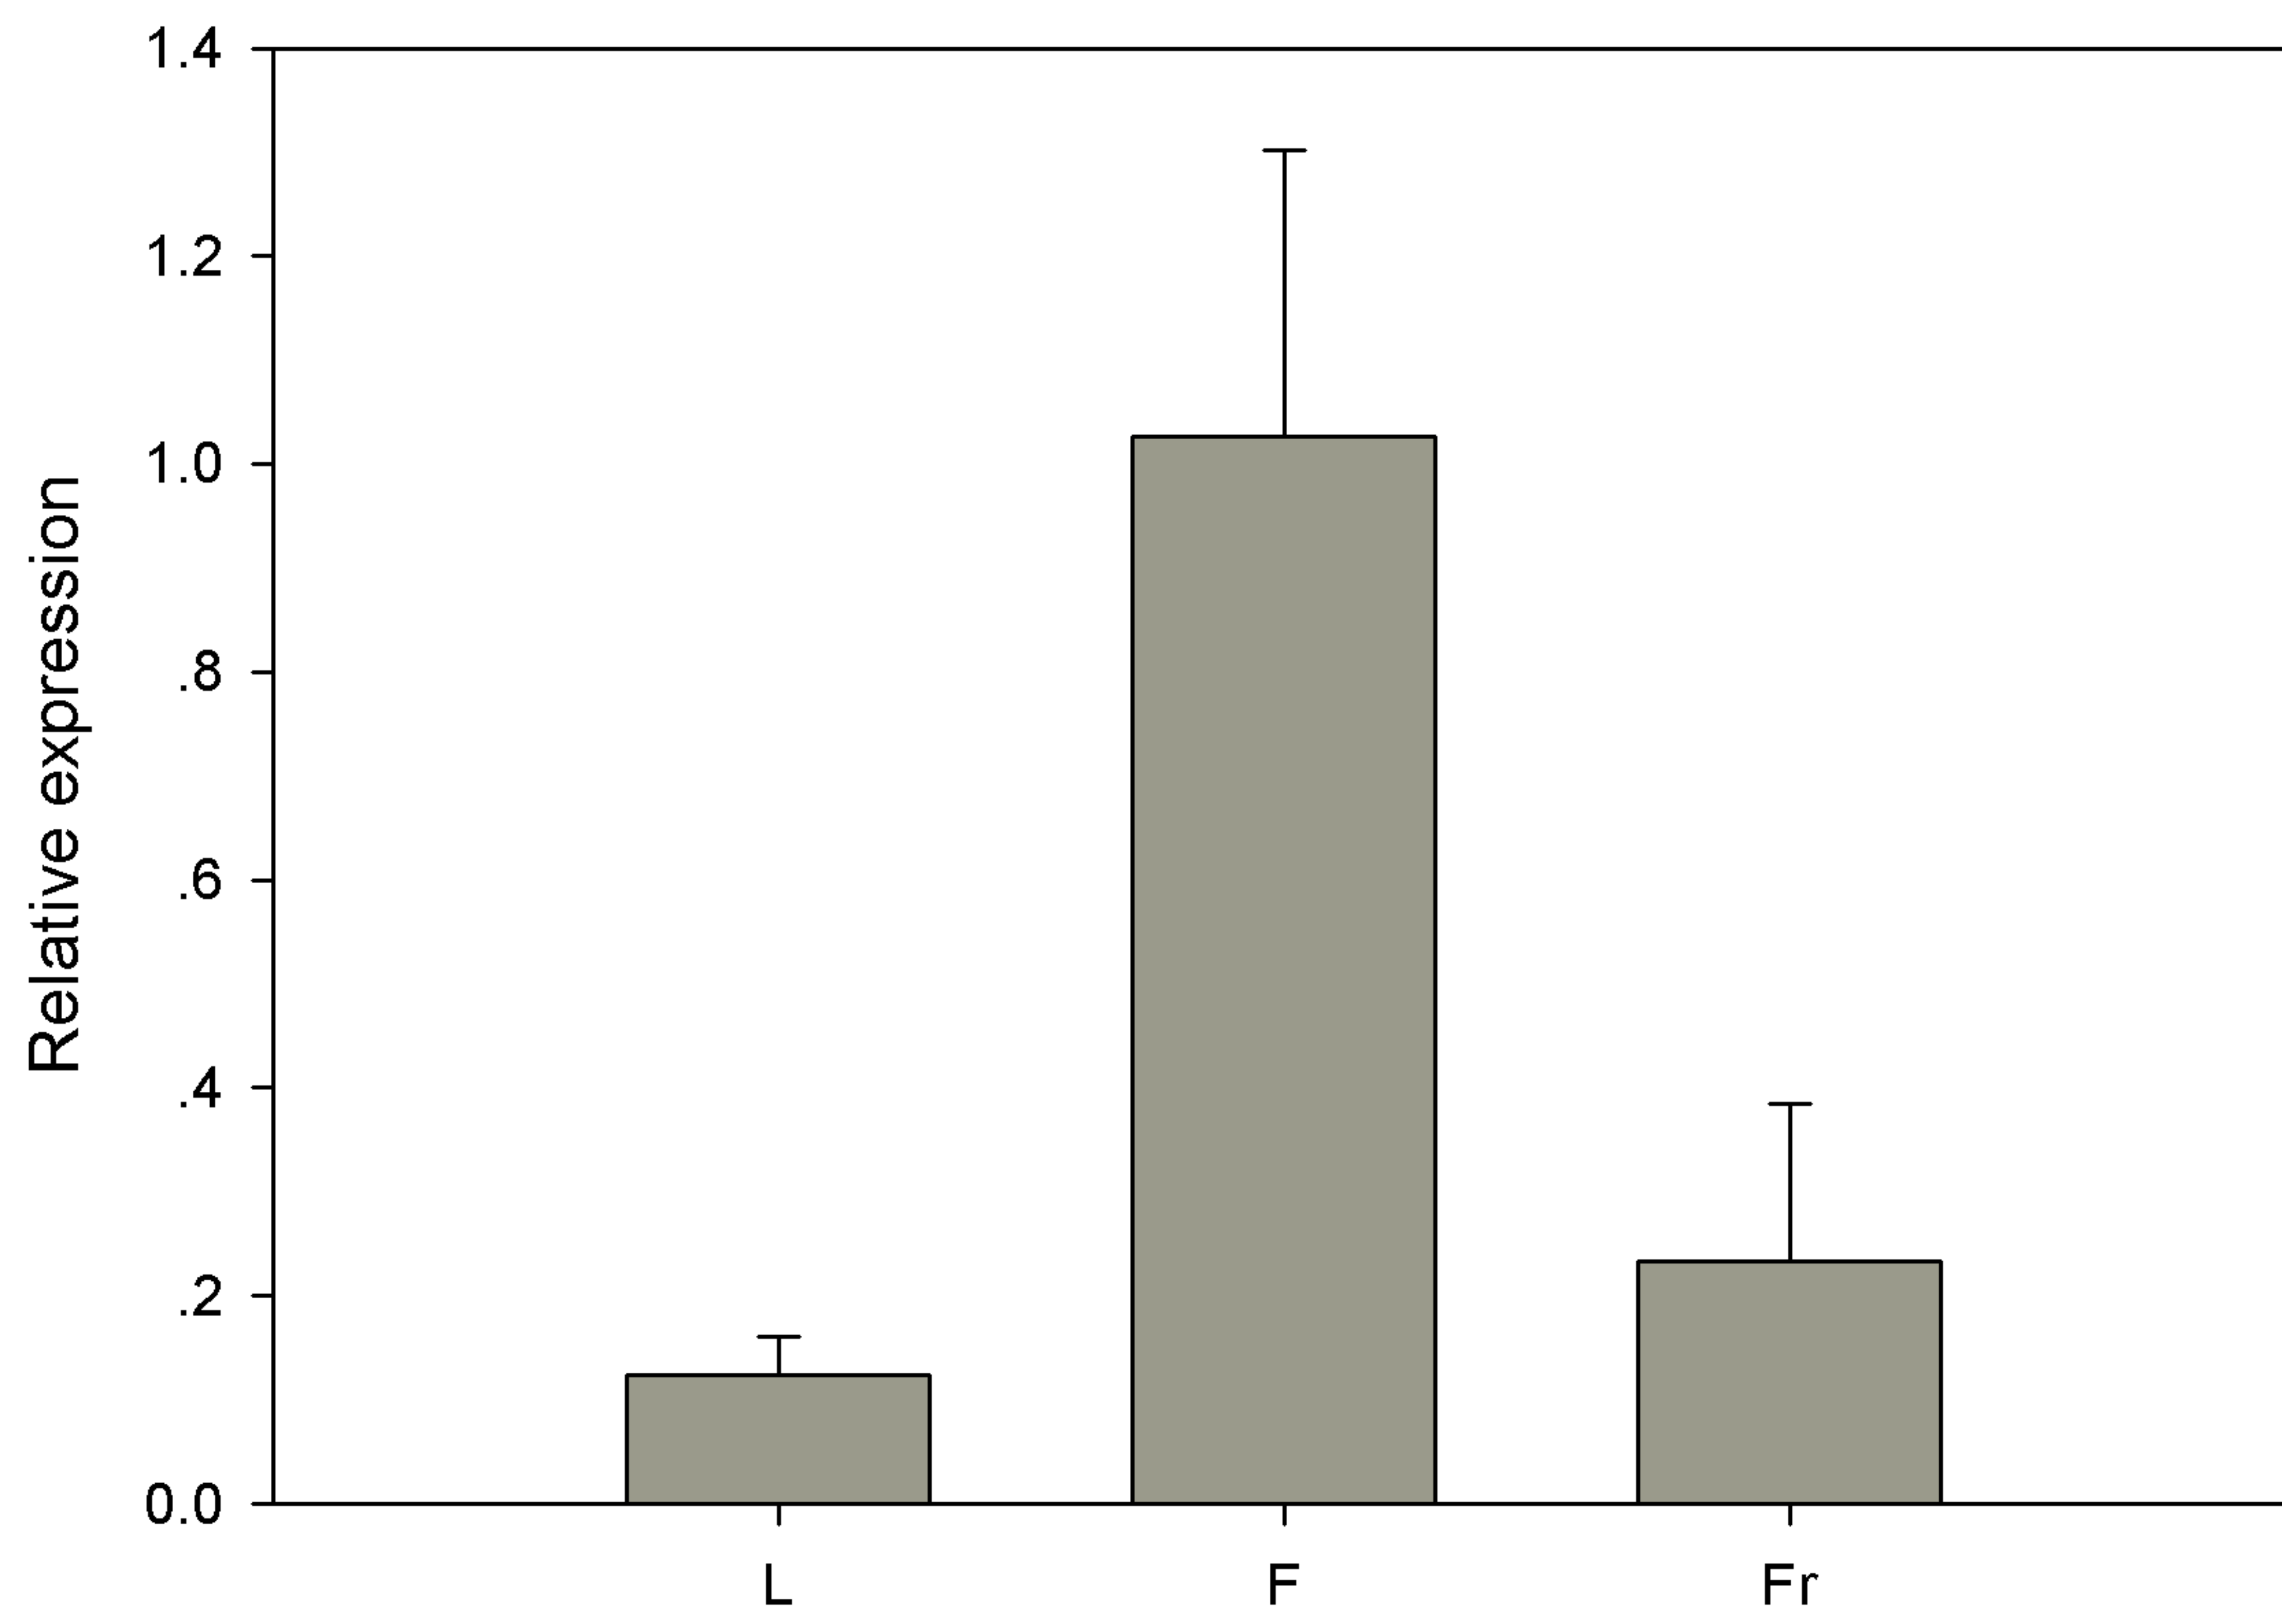



### Csi-miR827.1

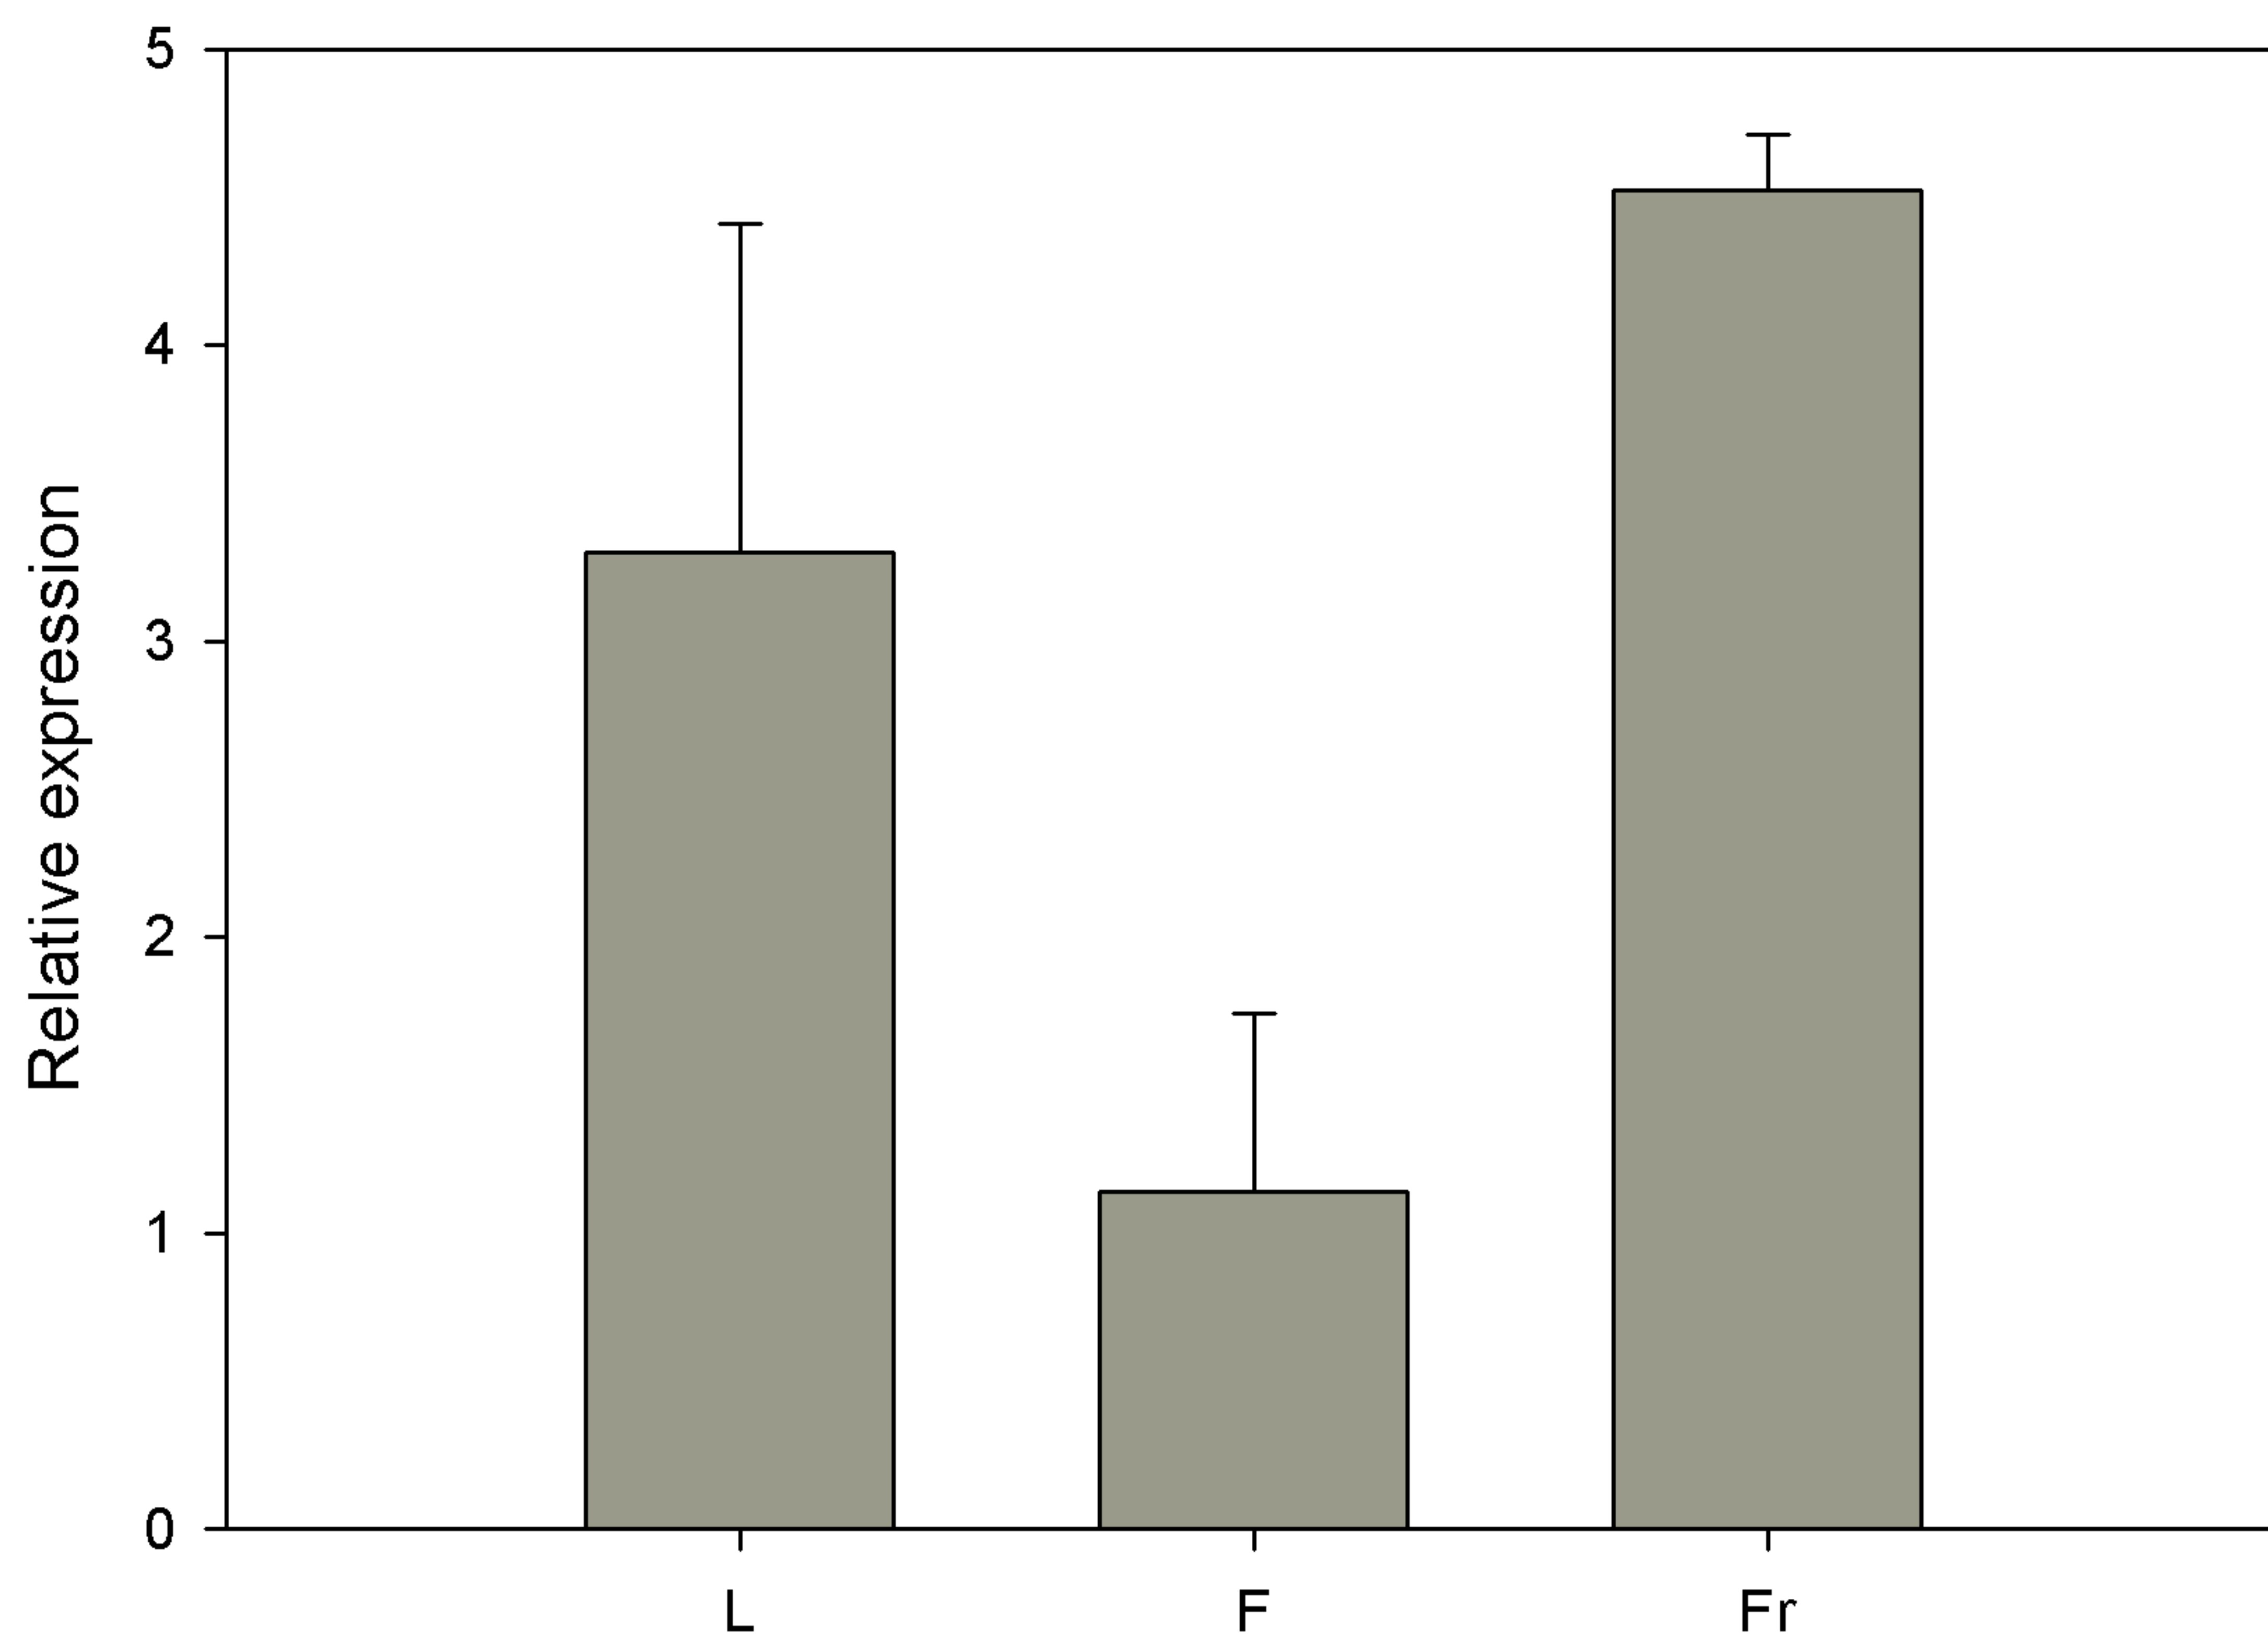

Csi-miR827-5p.2

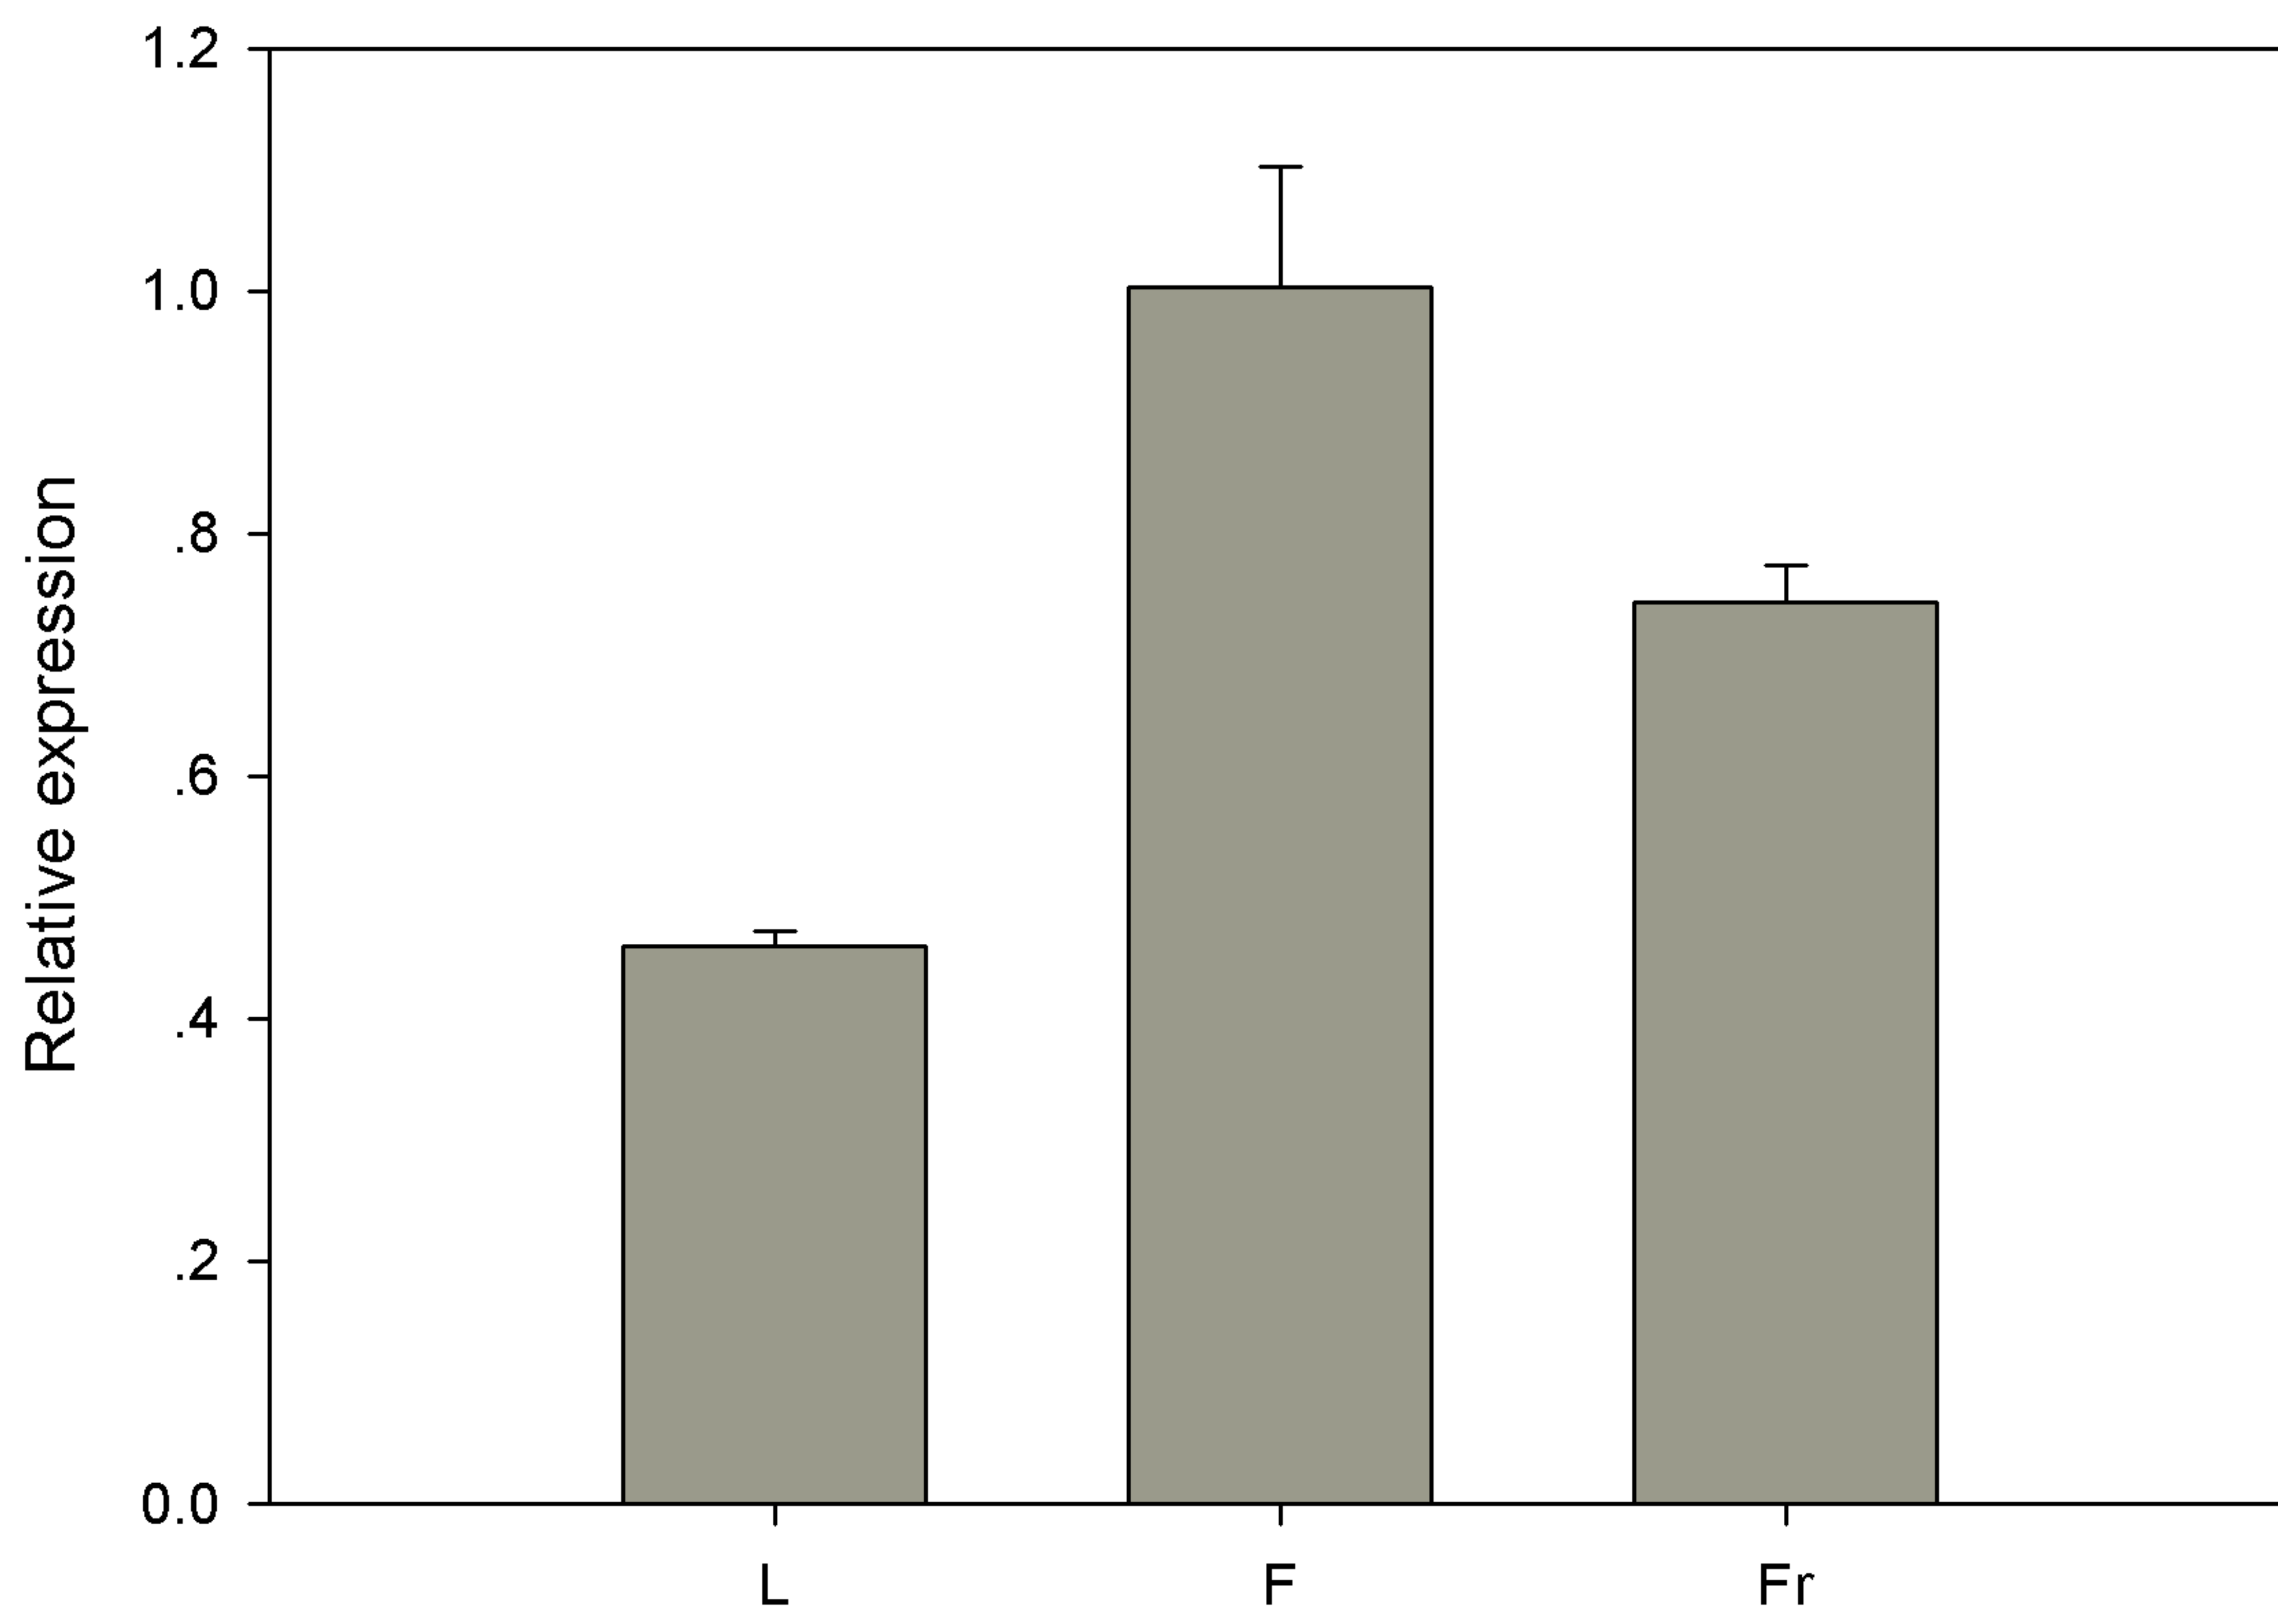

### Csi-miRN03

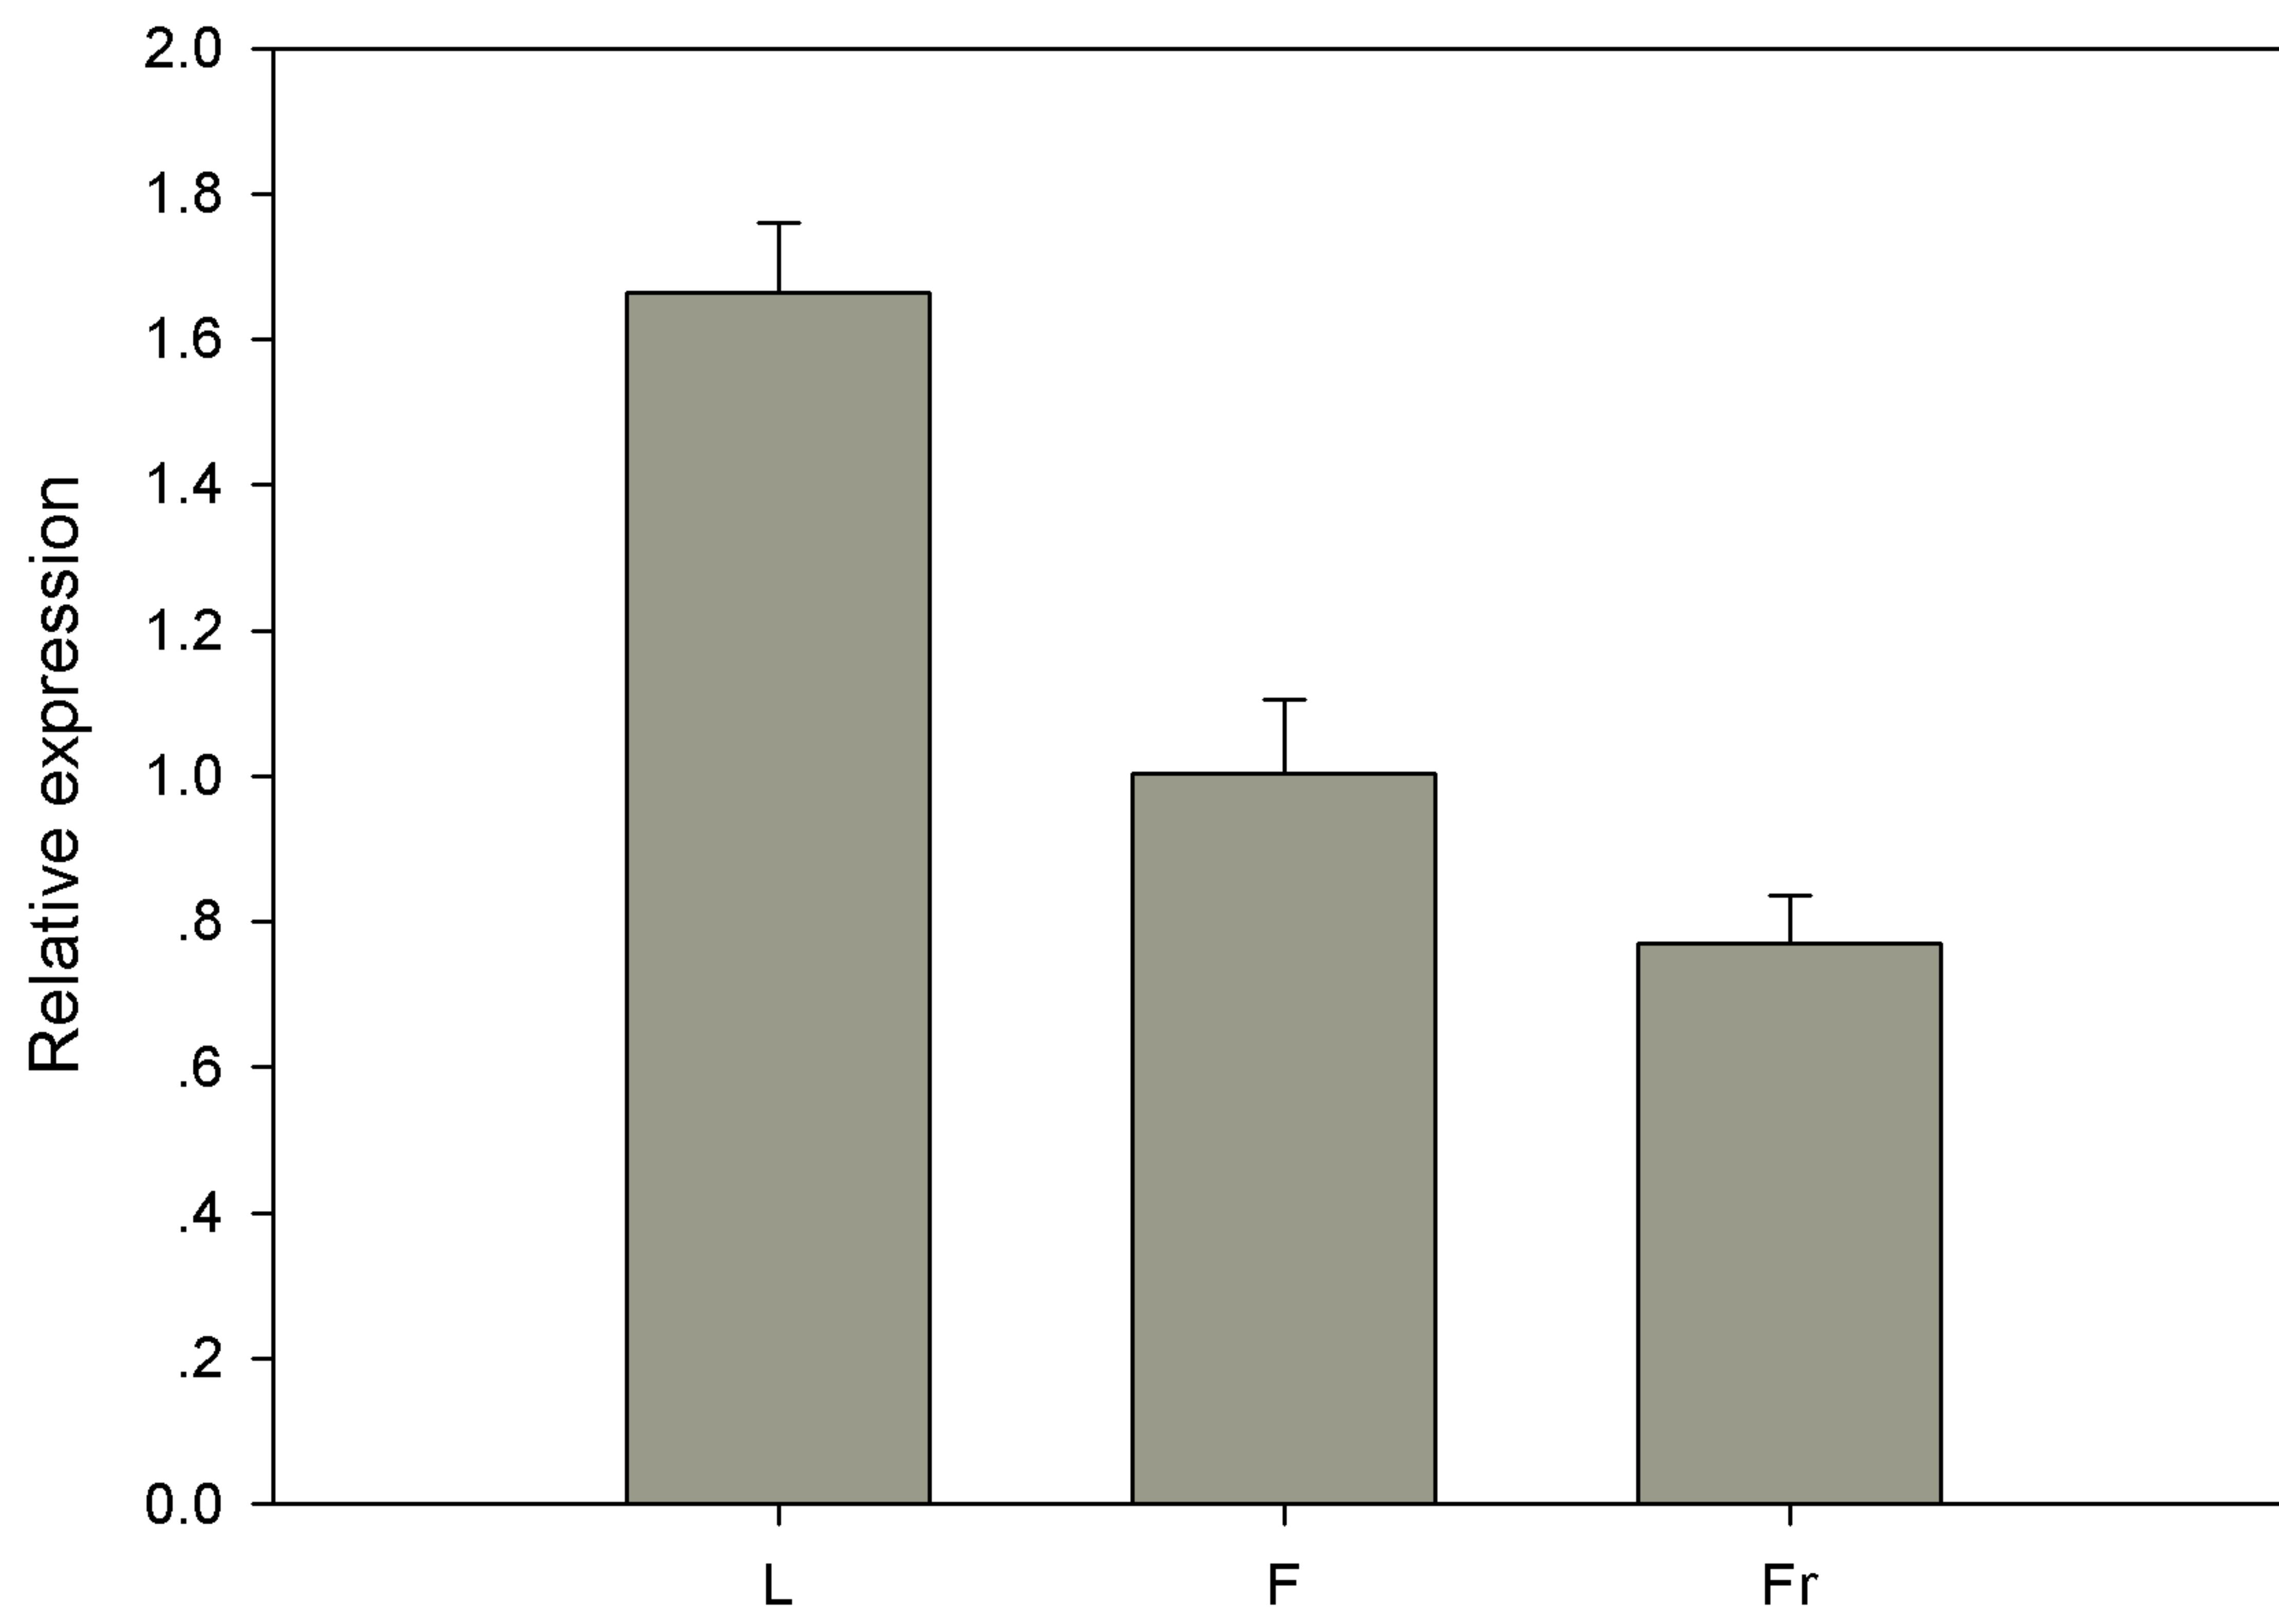

### Csi-miRN04

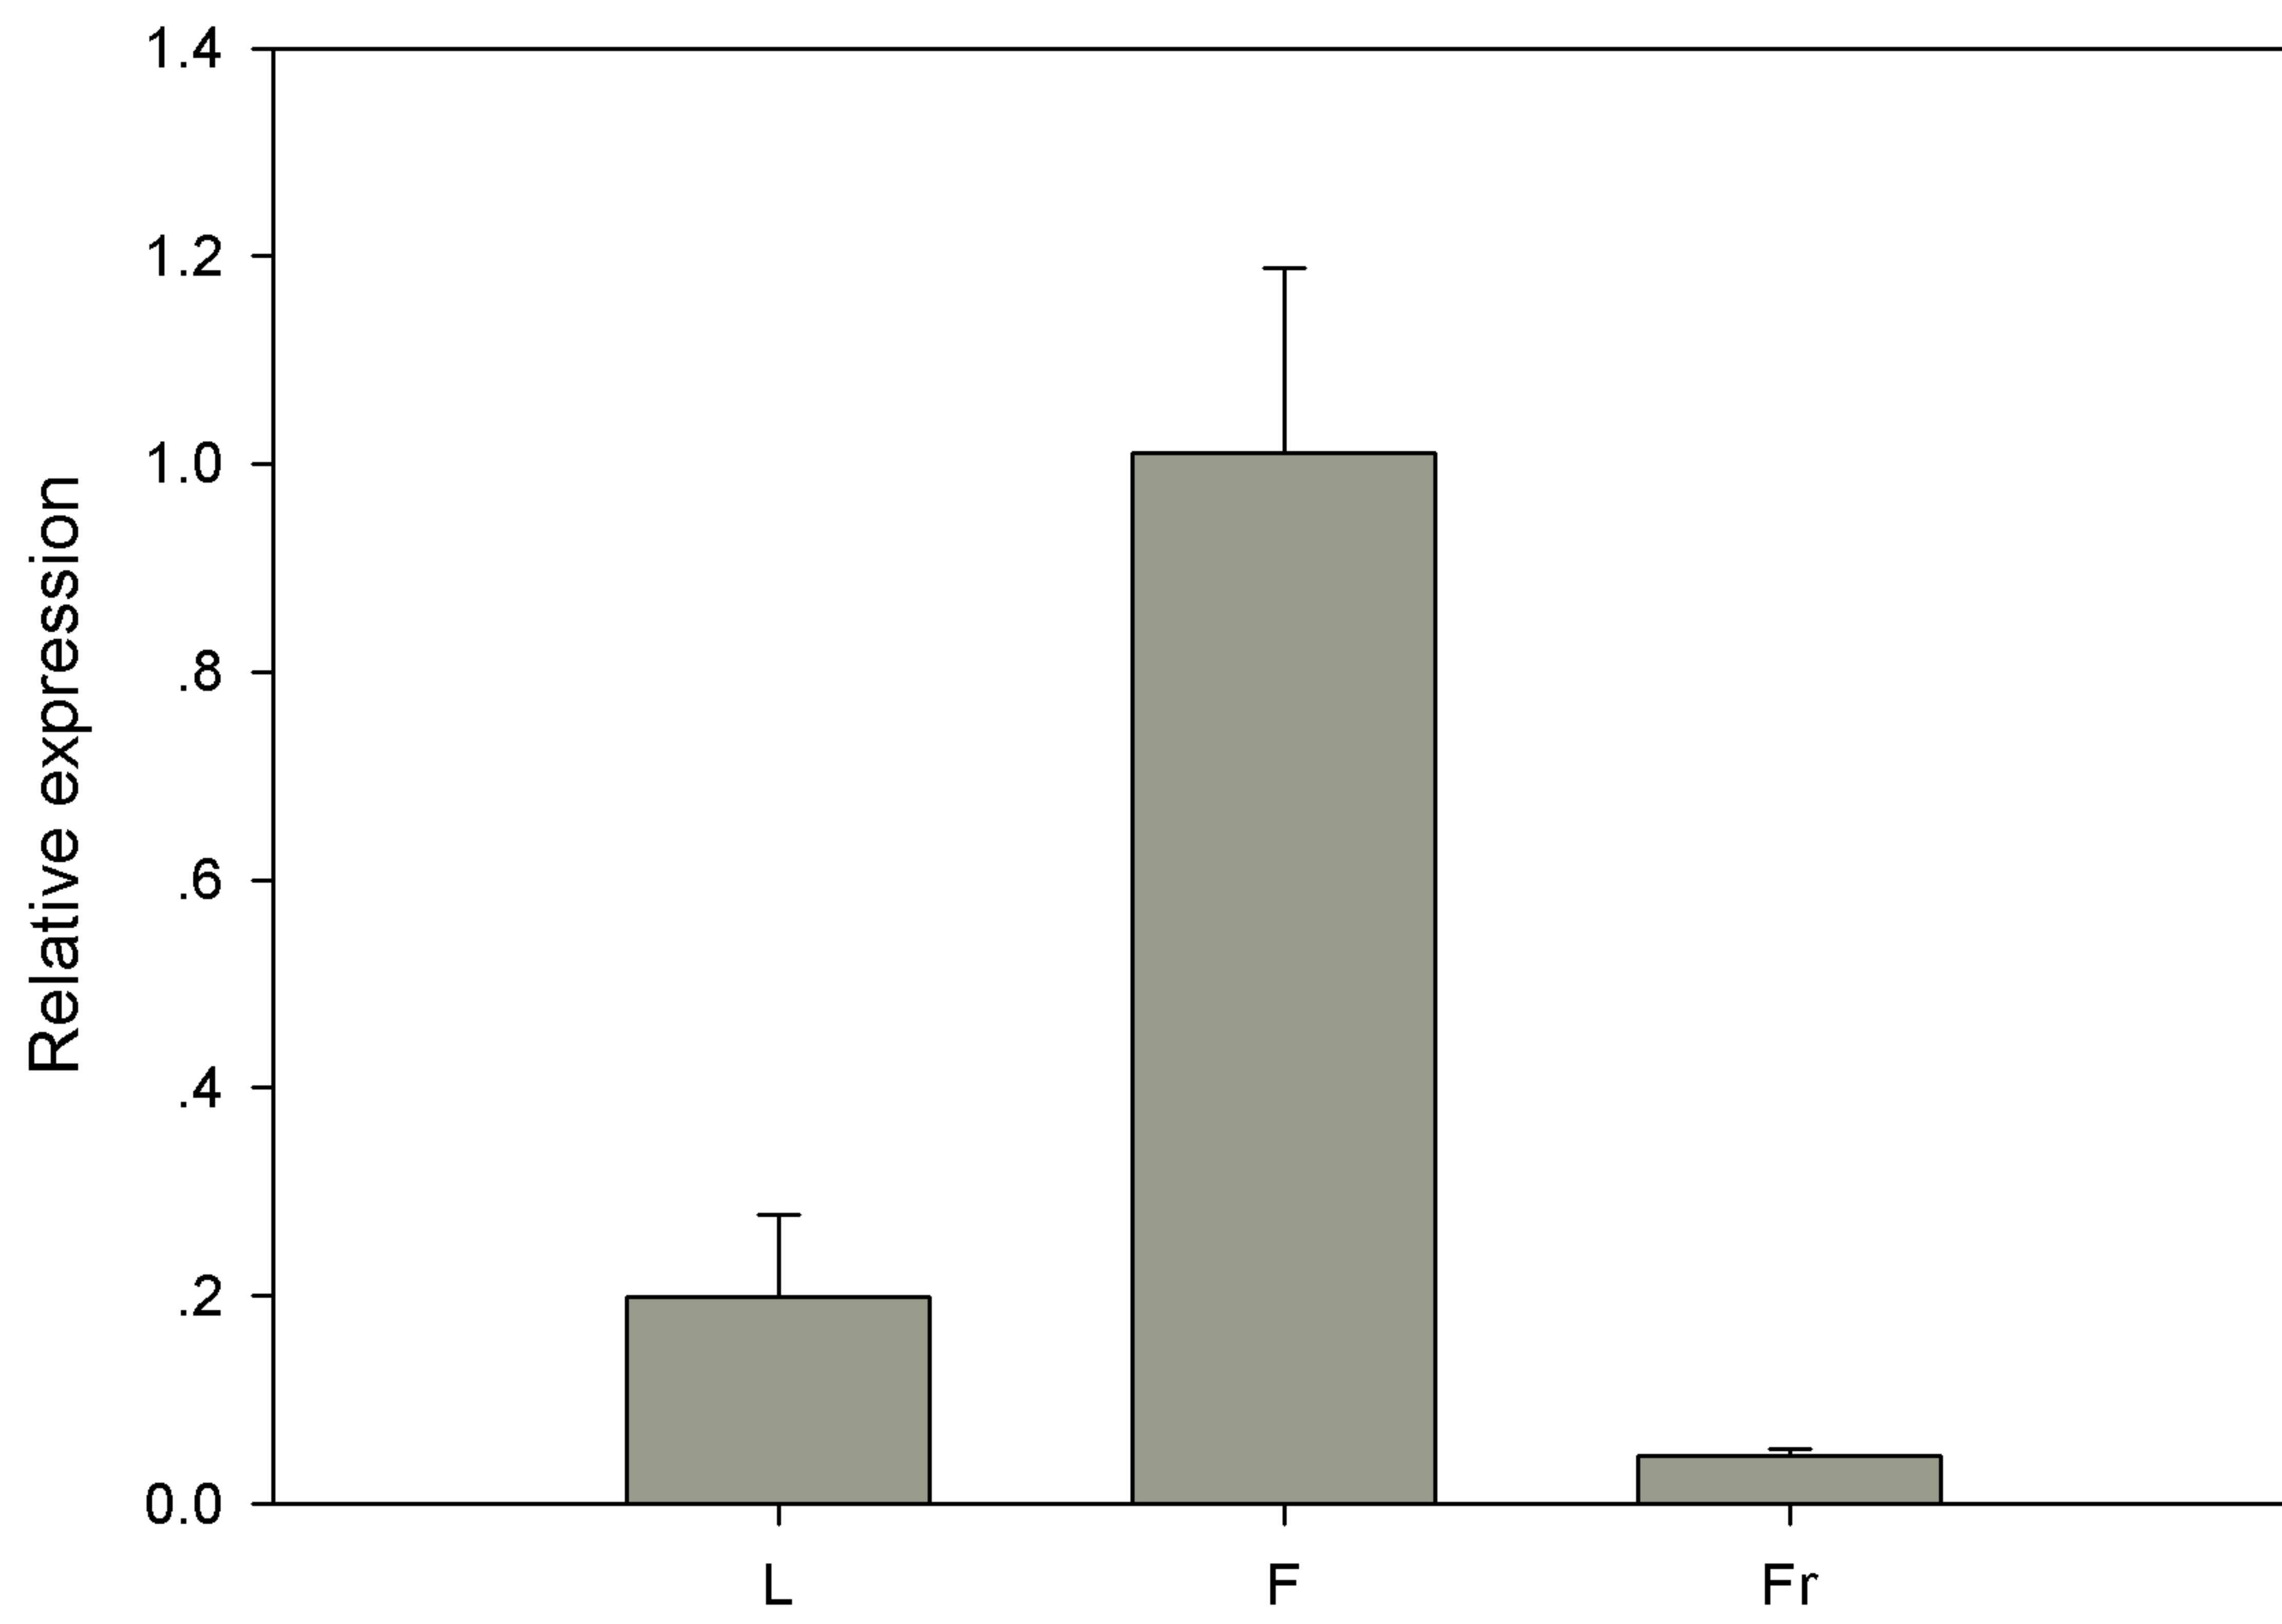

### Csi-miRN07

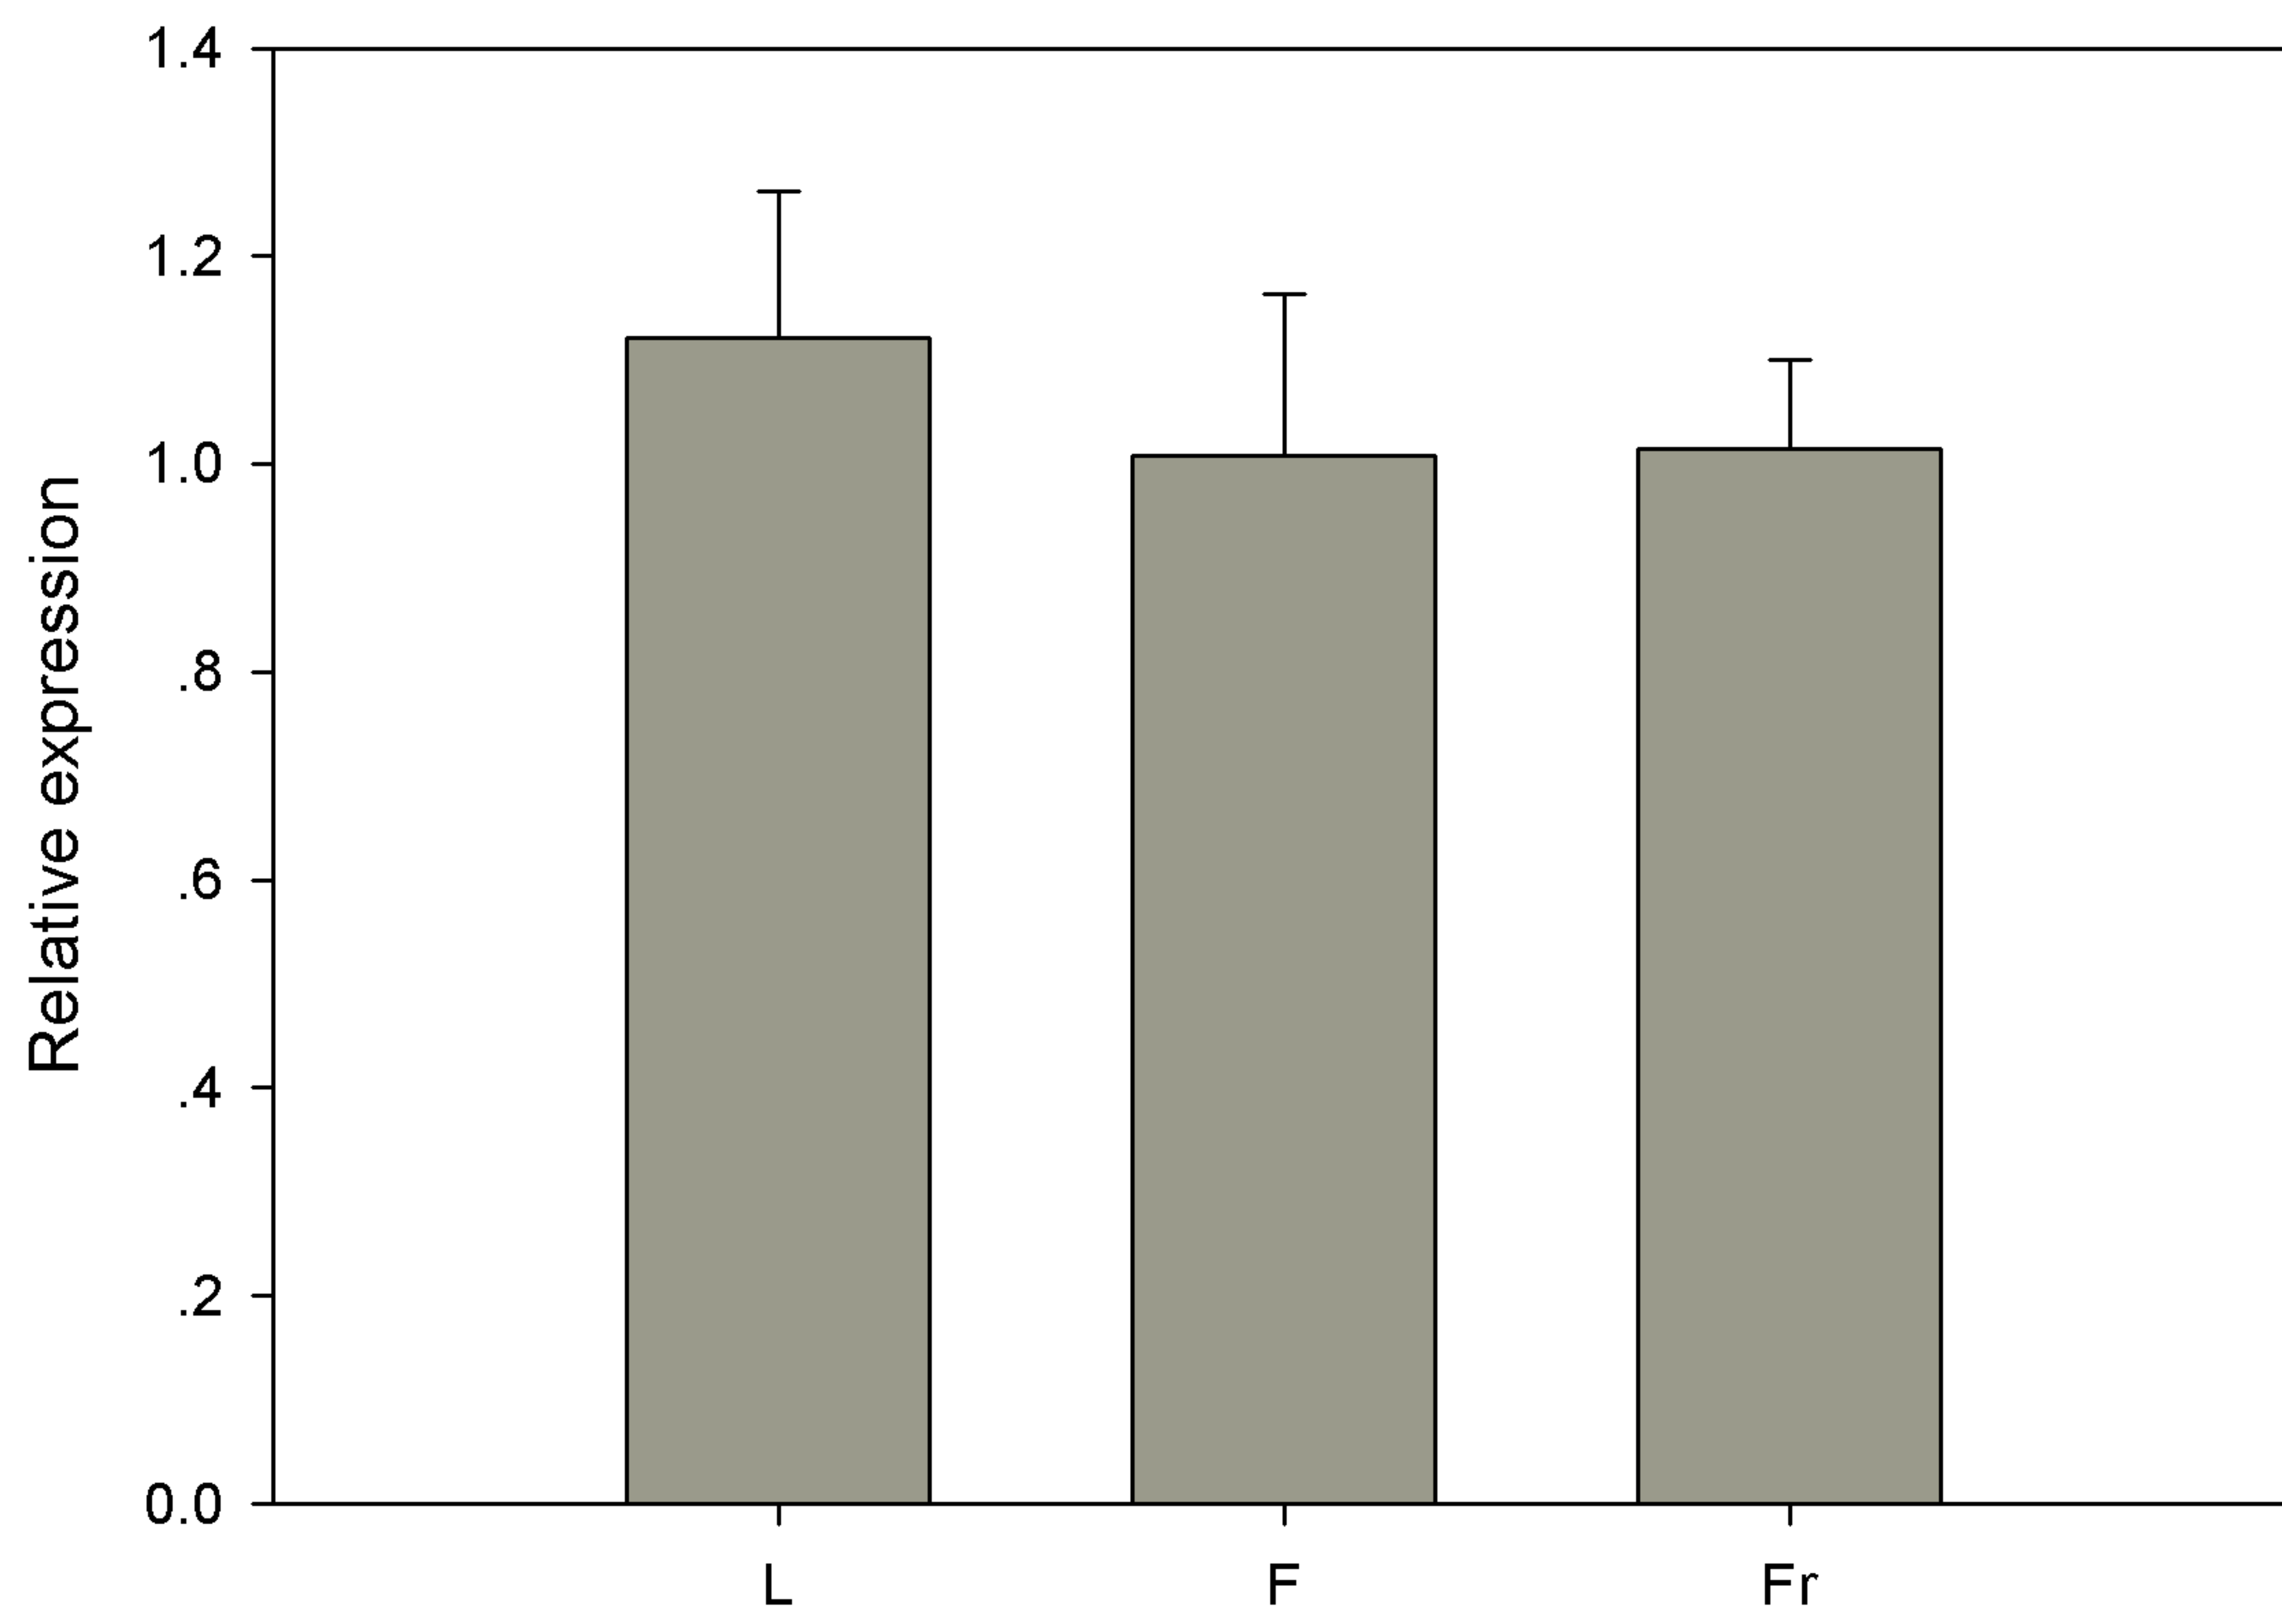

### Csi-miRN08

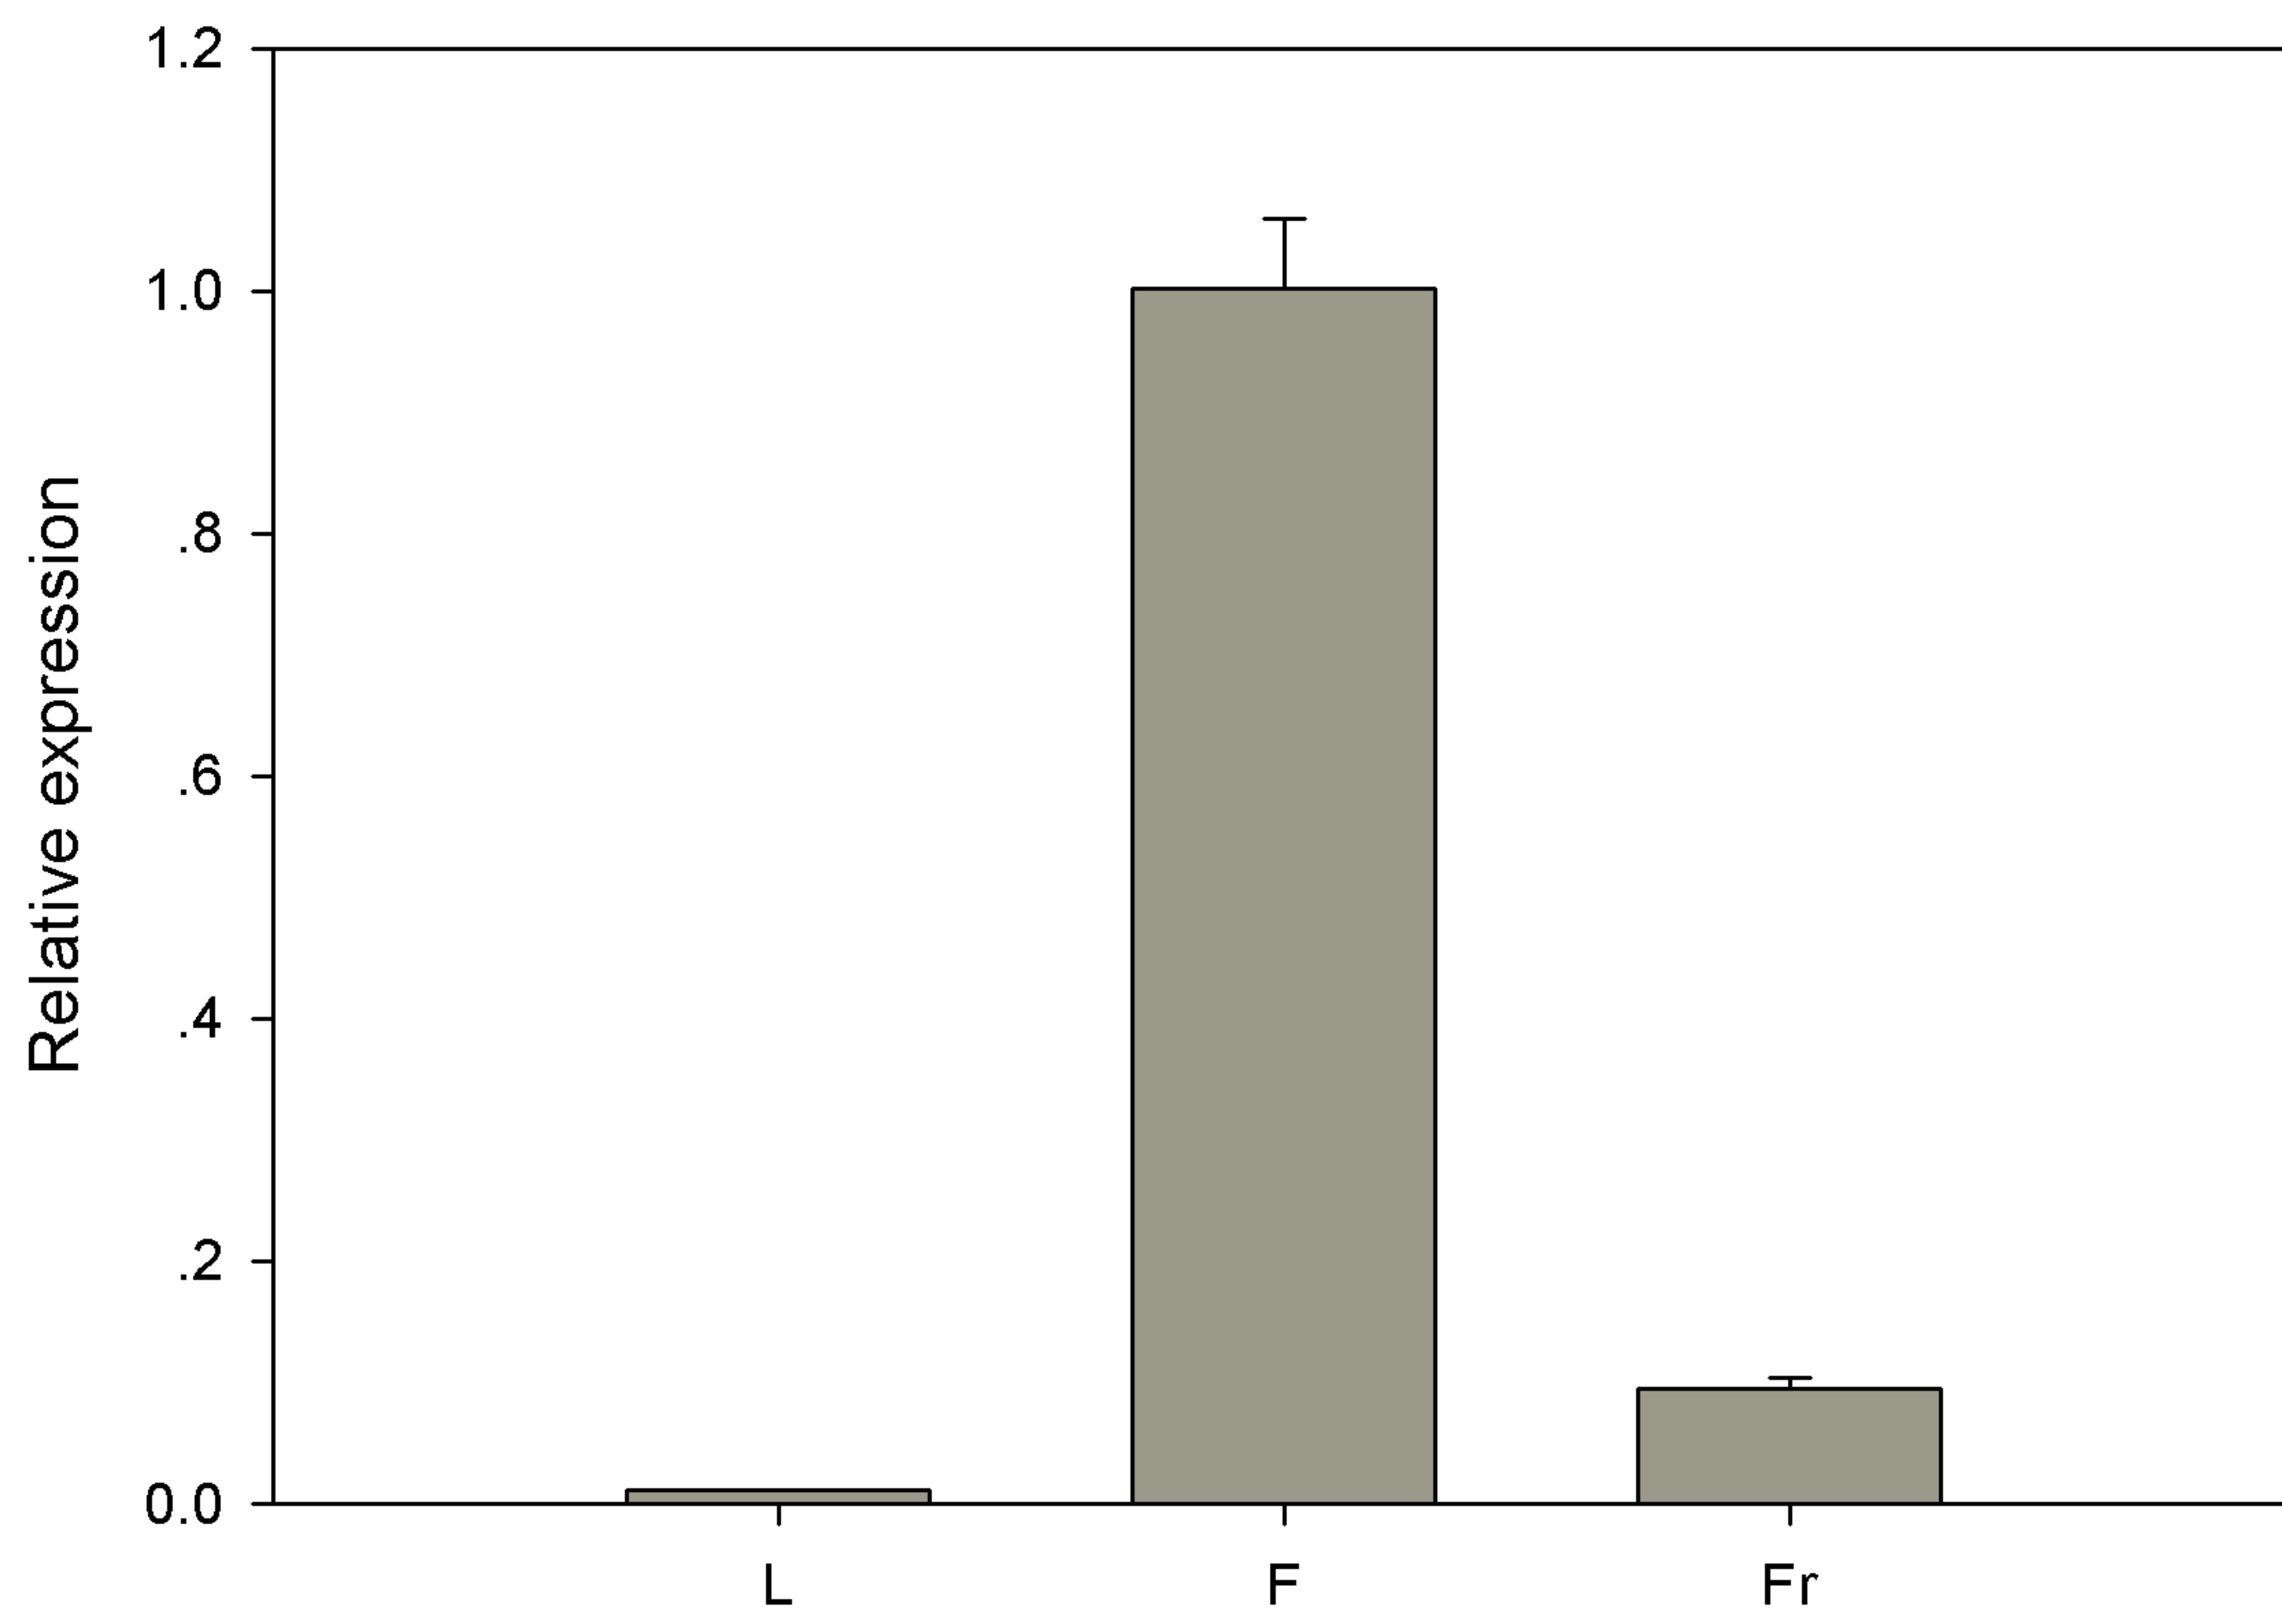

### Csi-miRN11

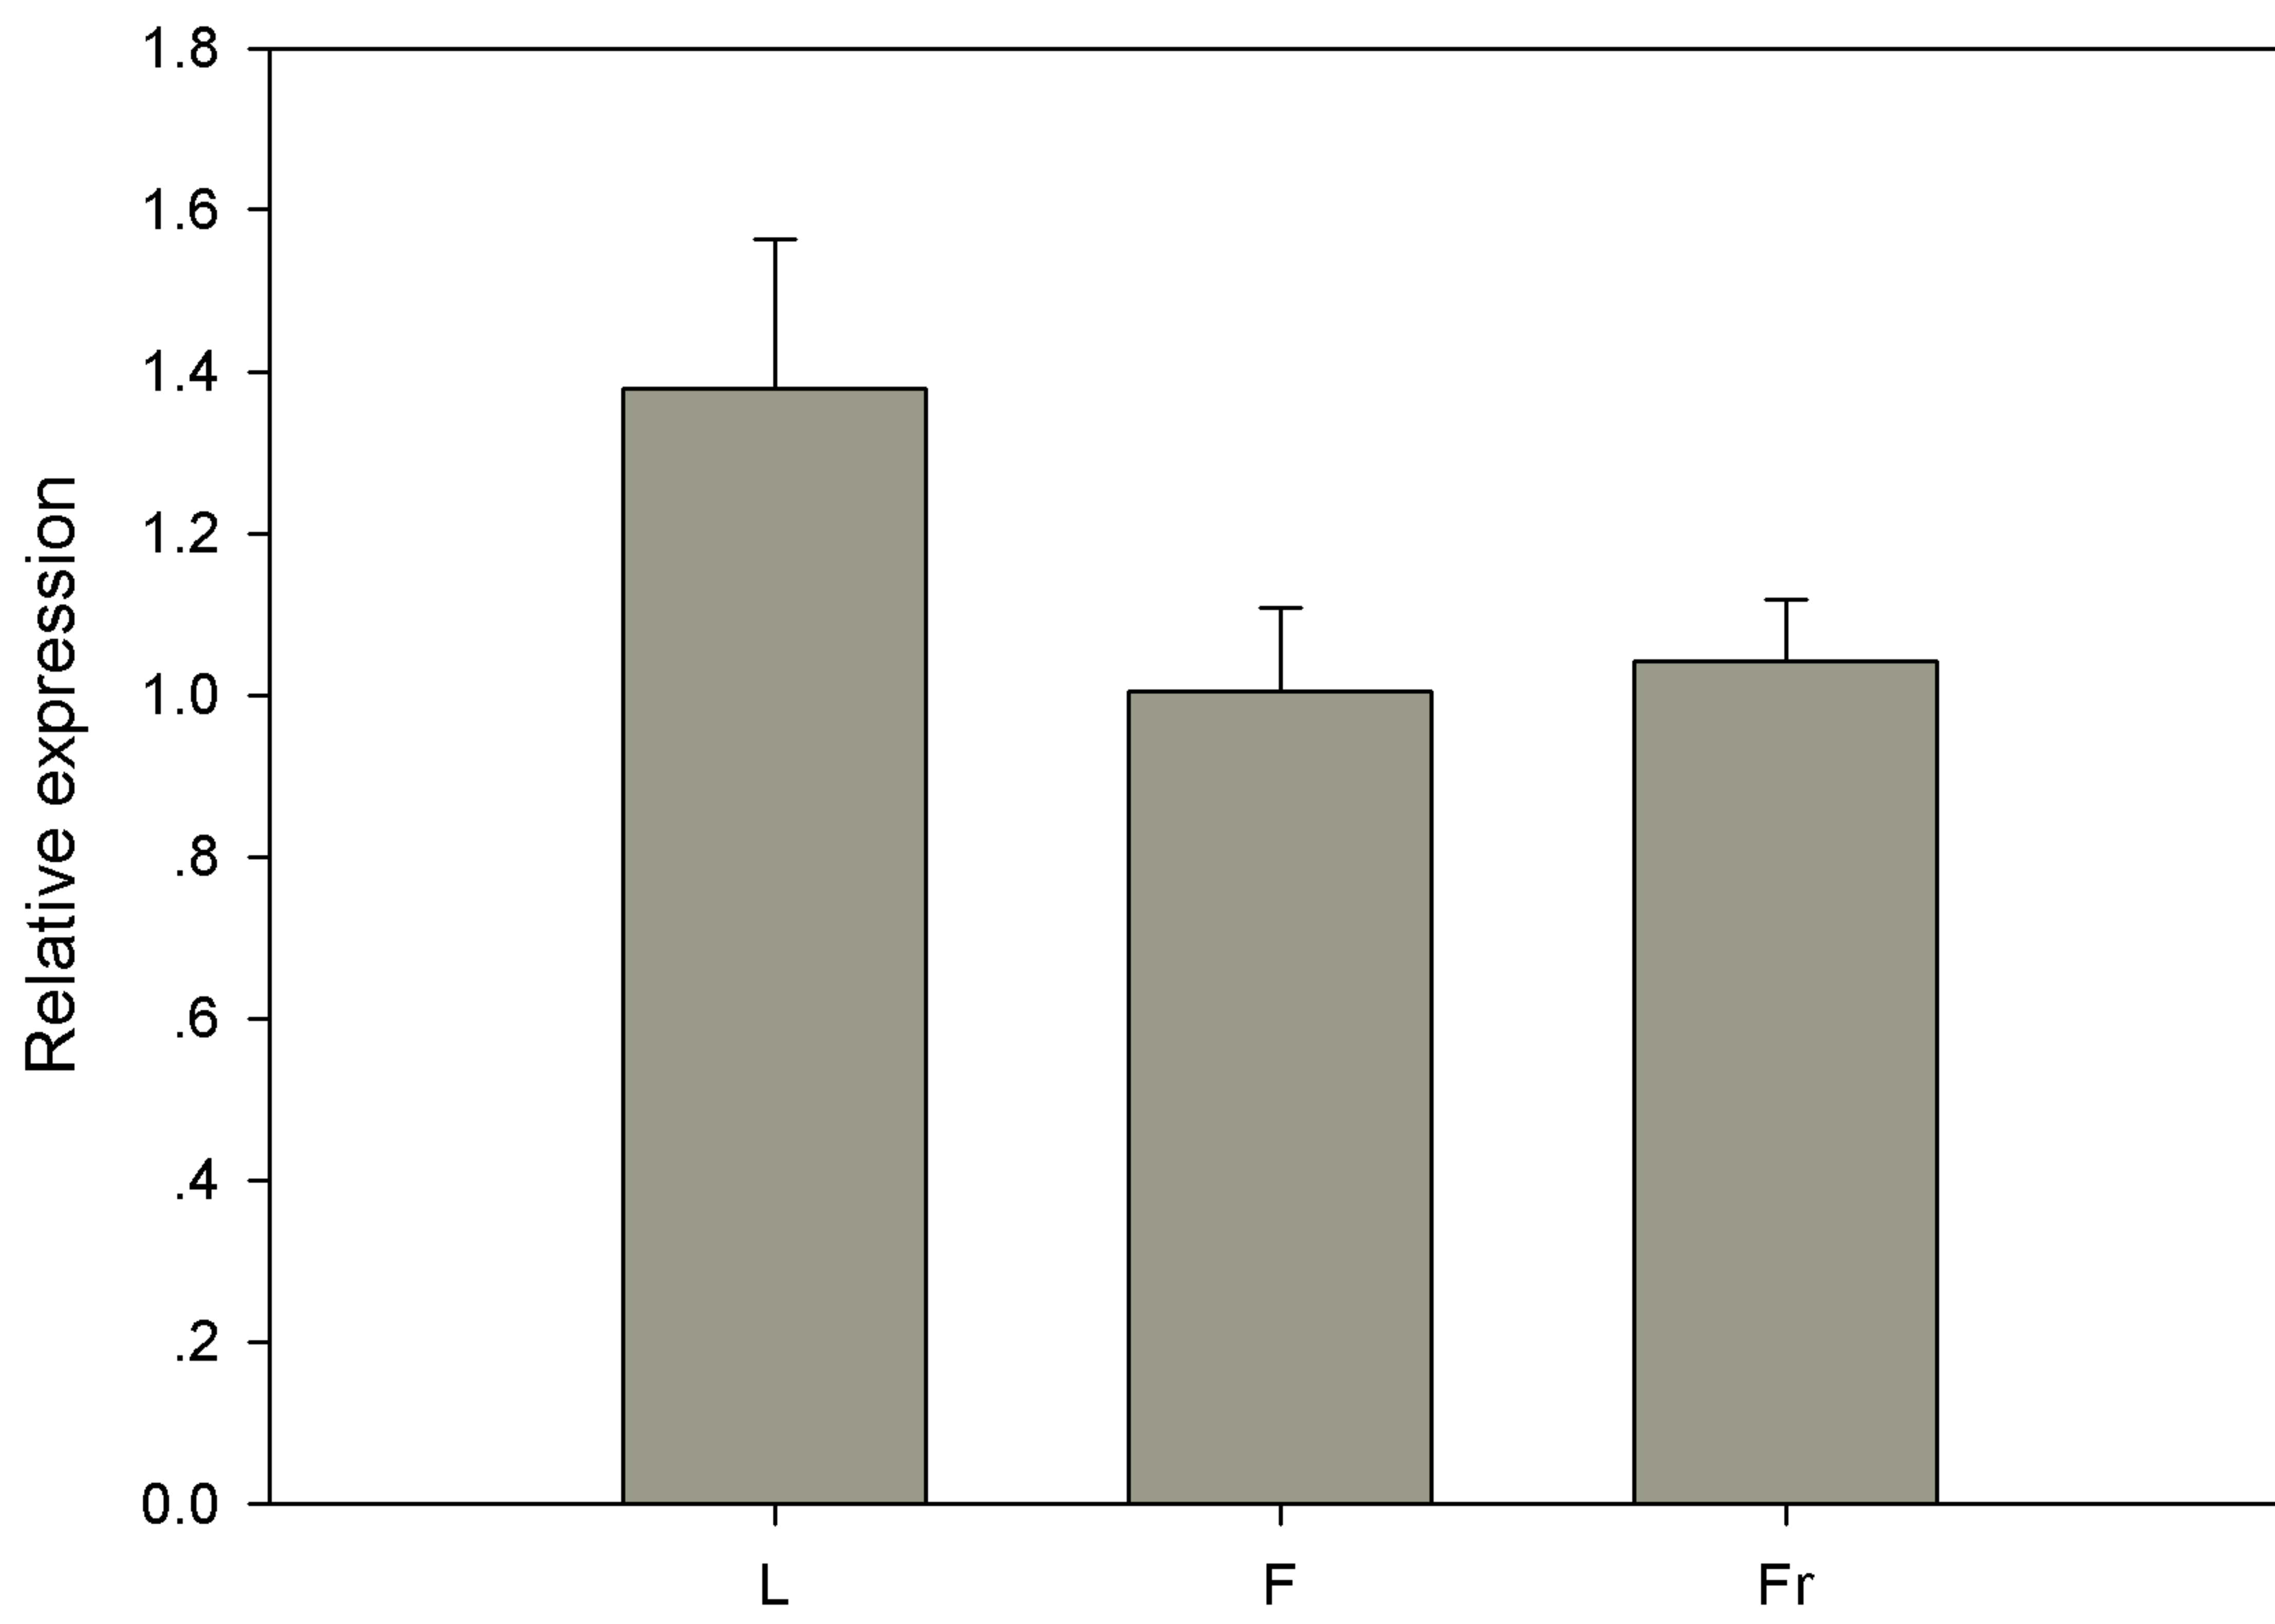

### Csi-miRN12

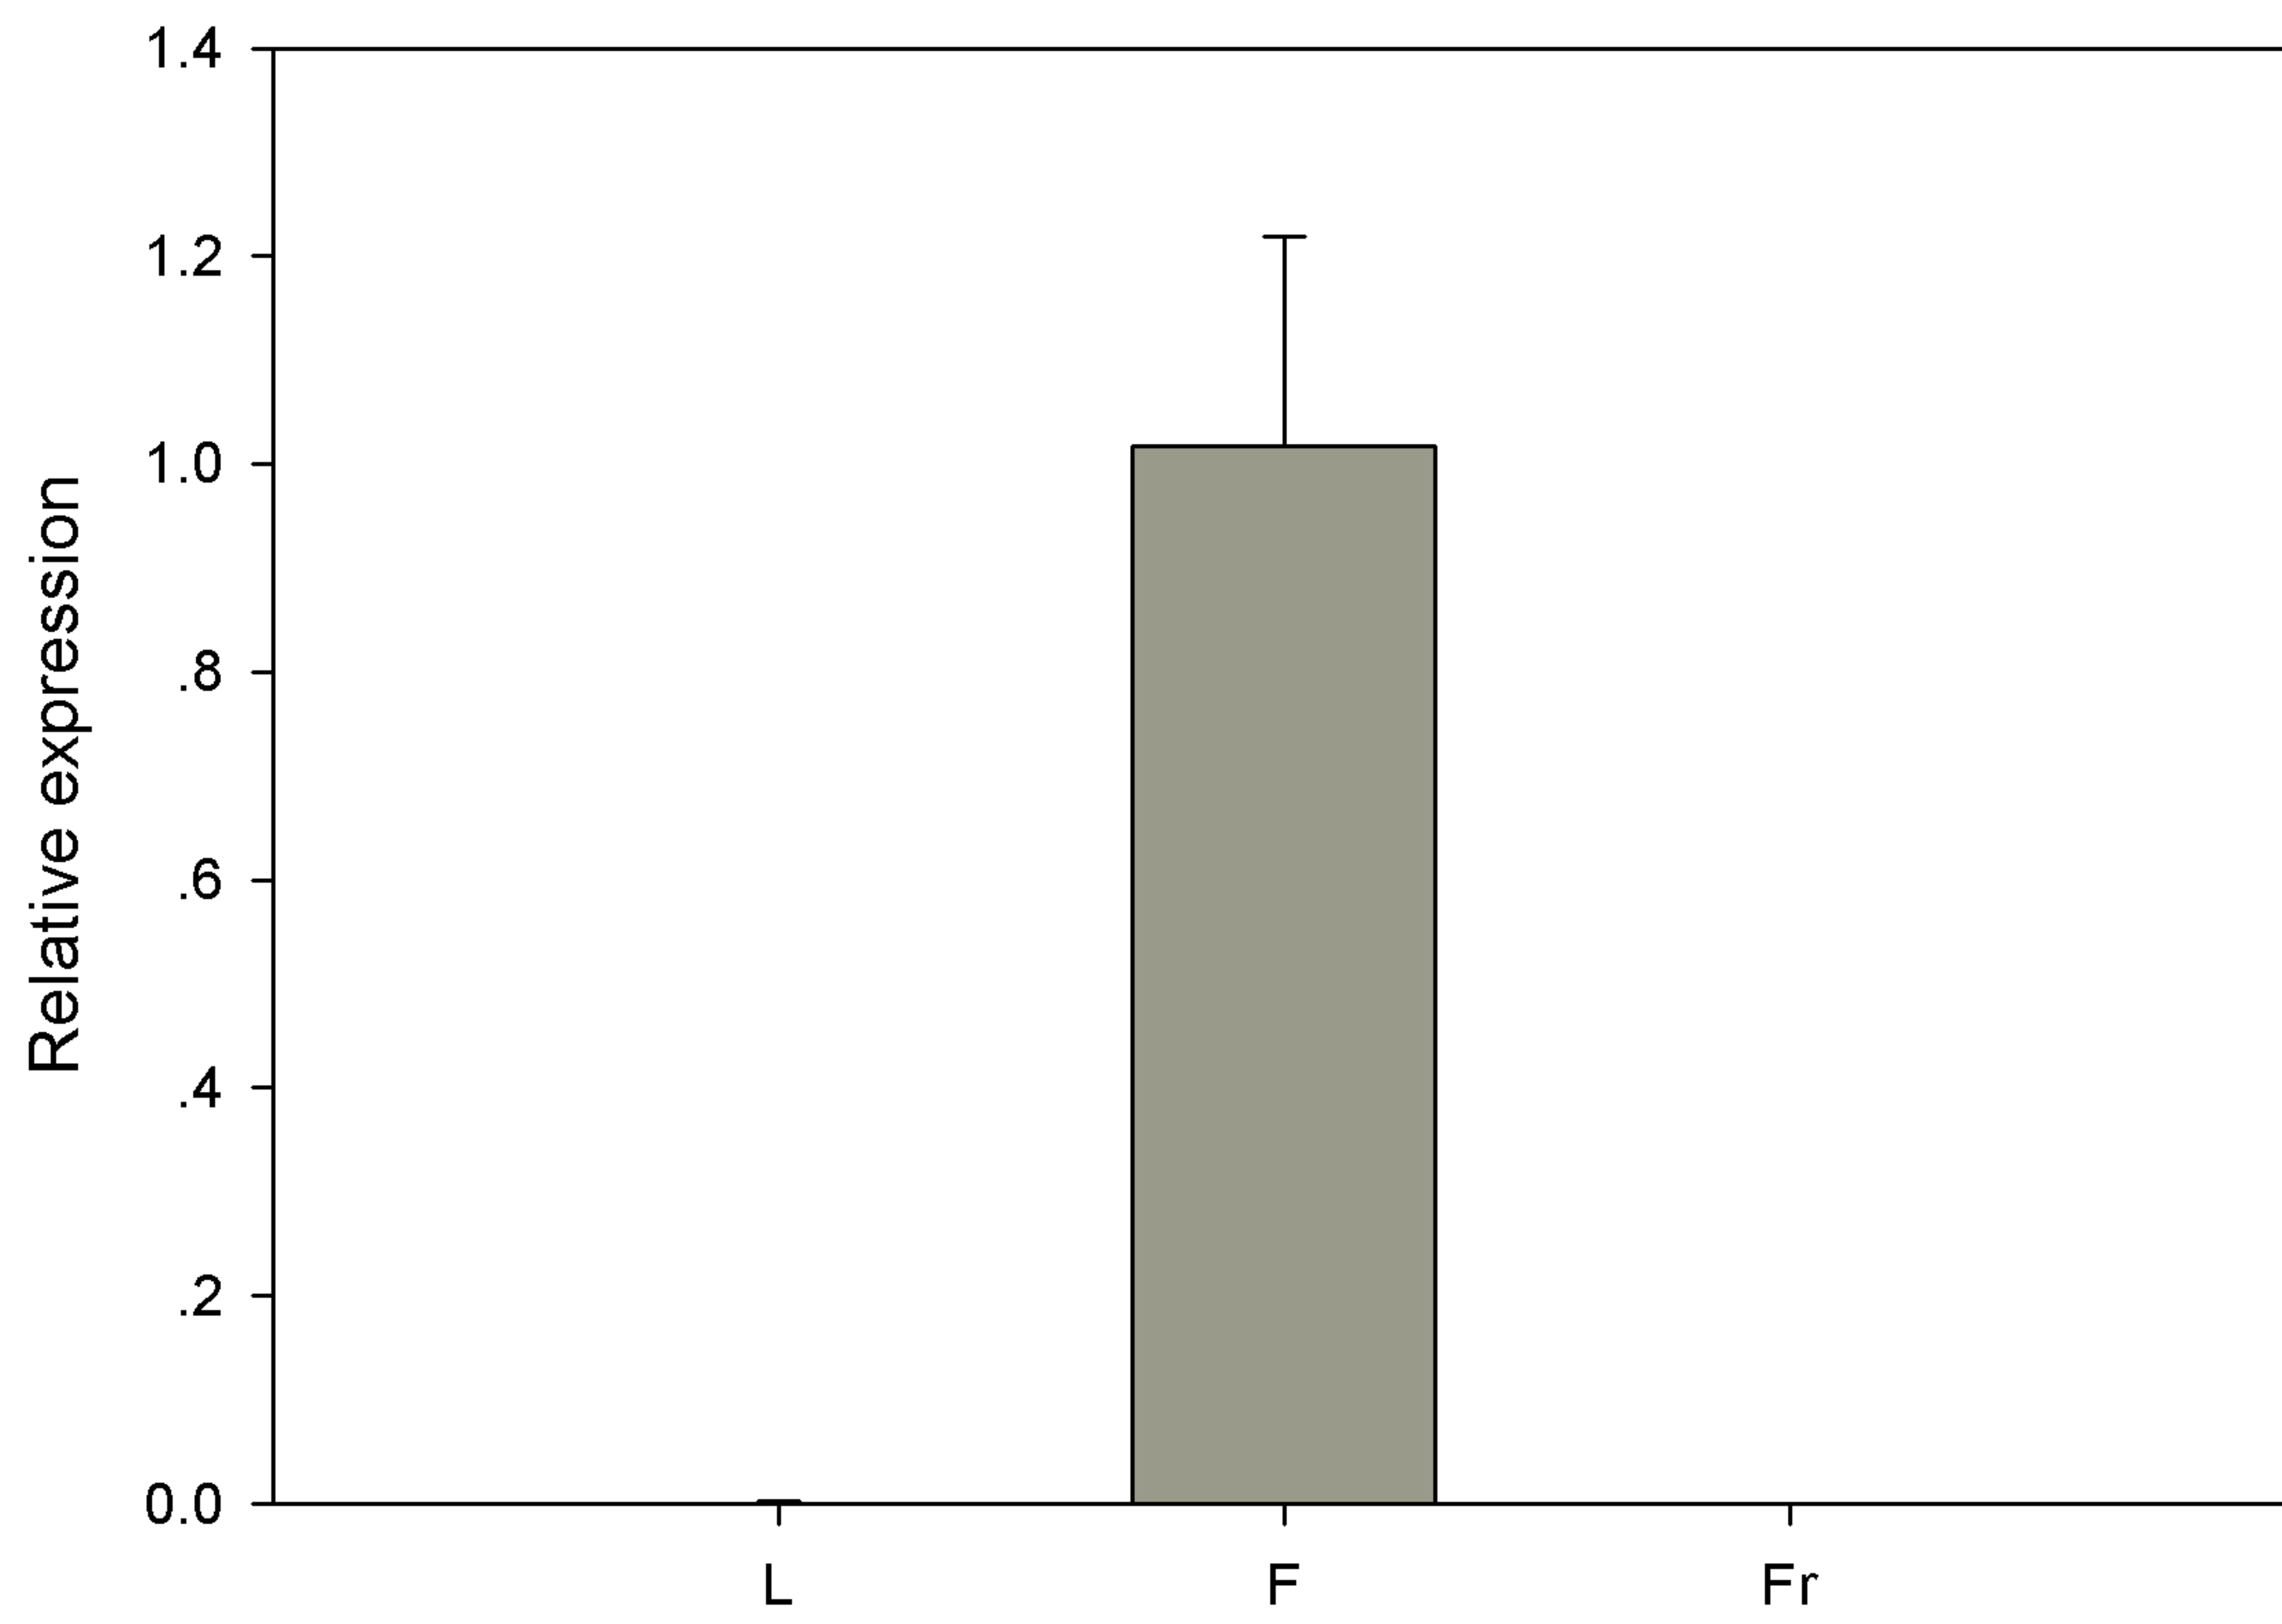



### Csi-miRN15

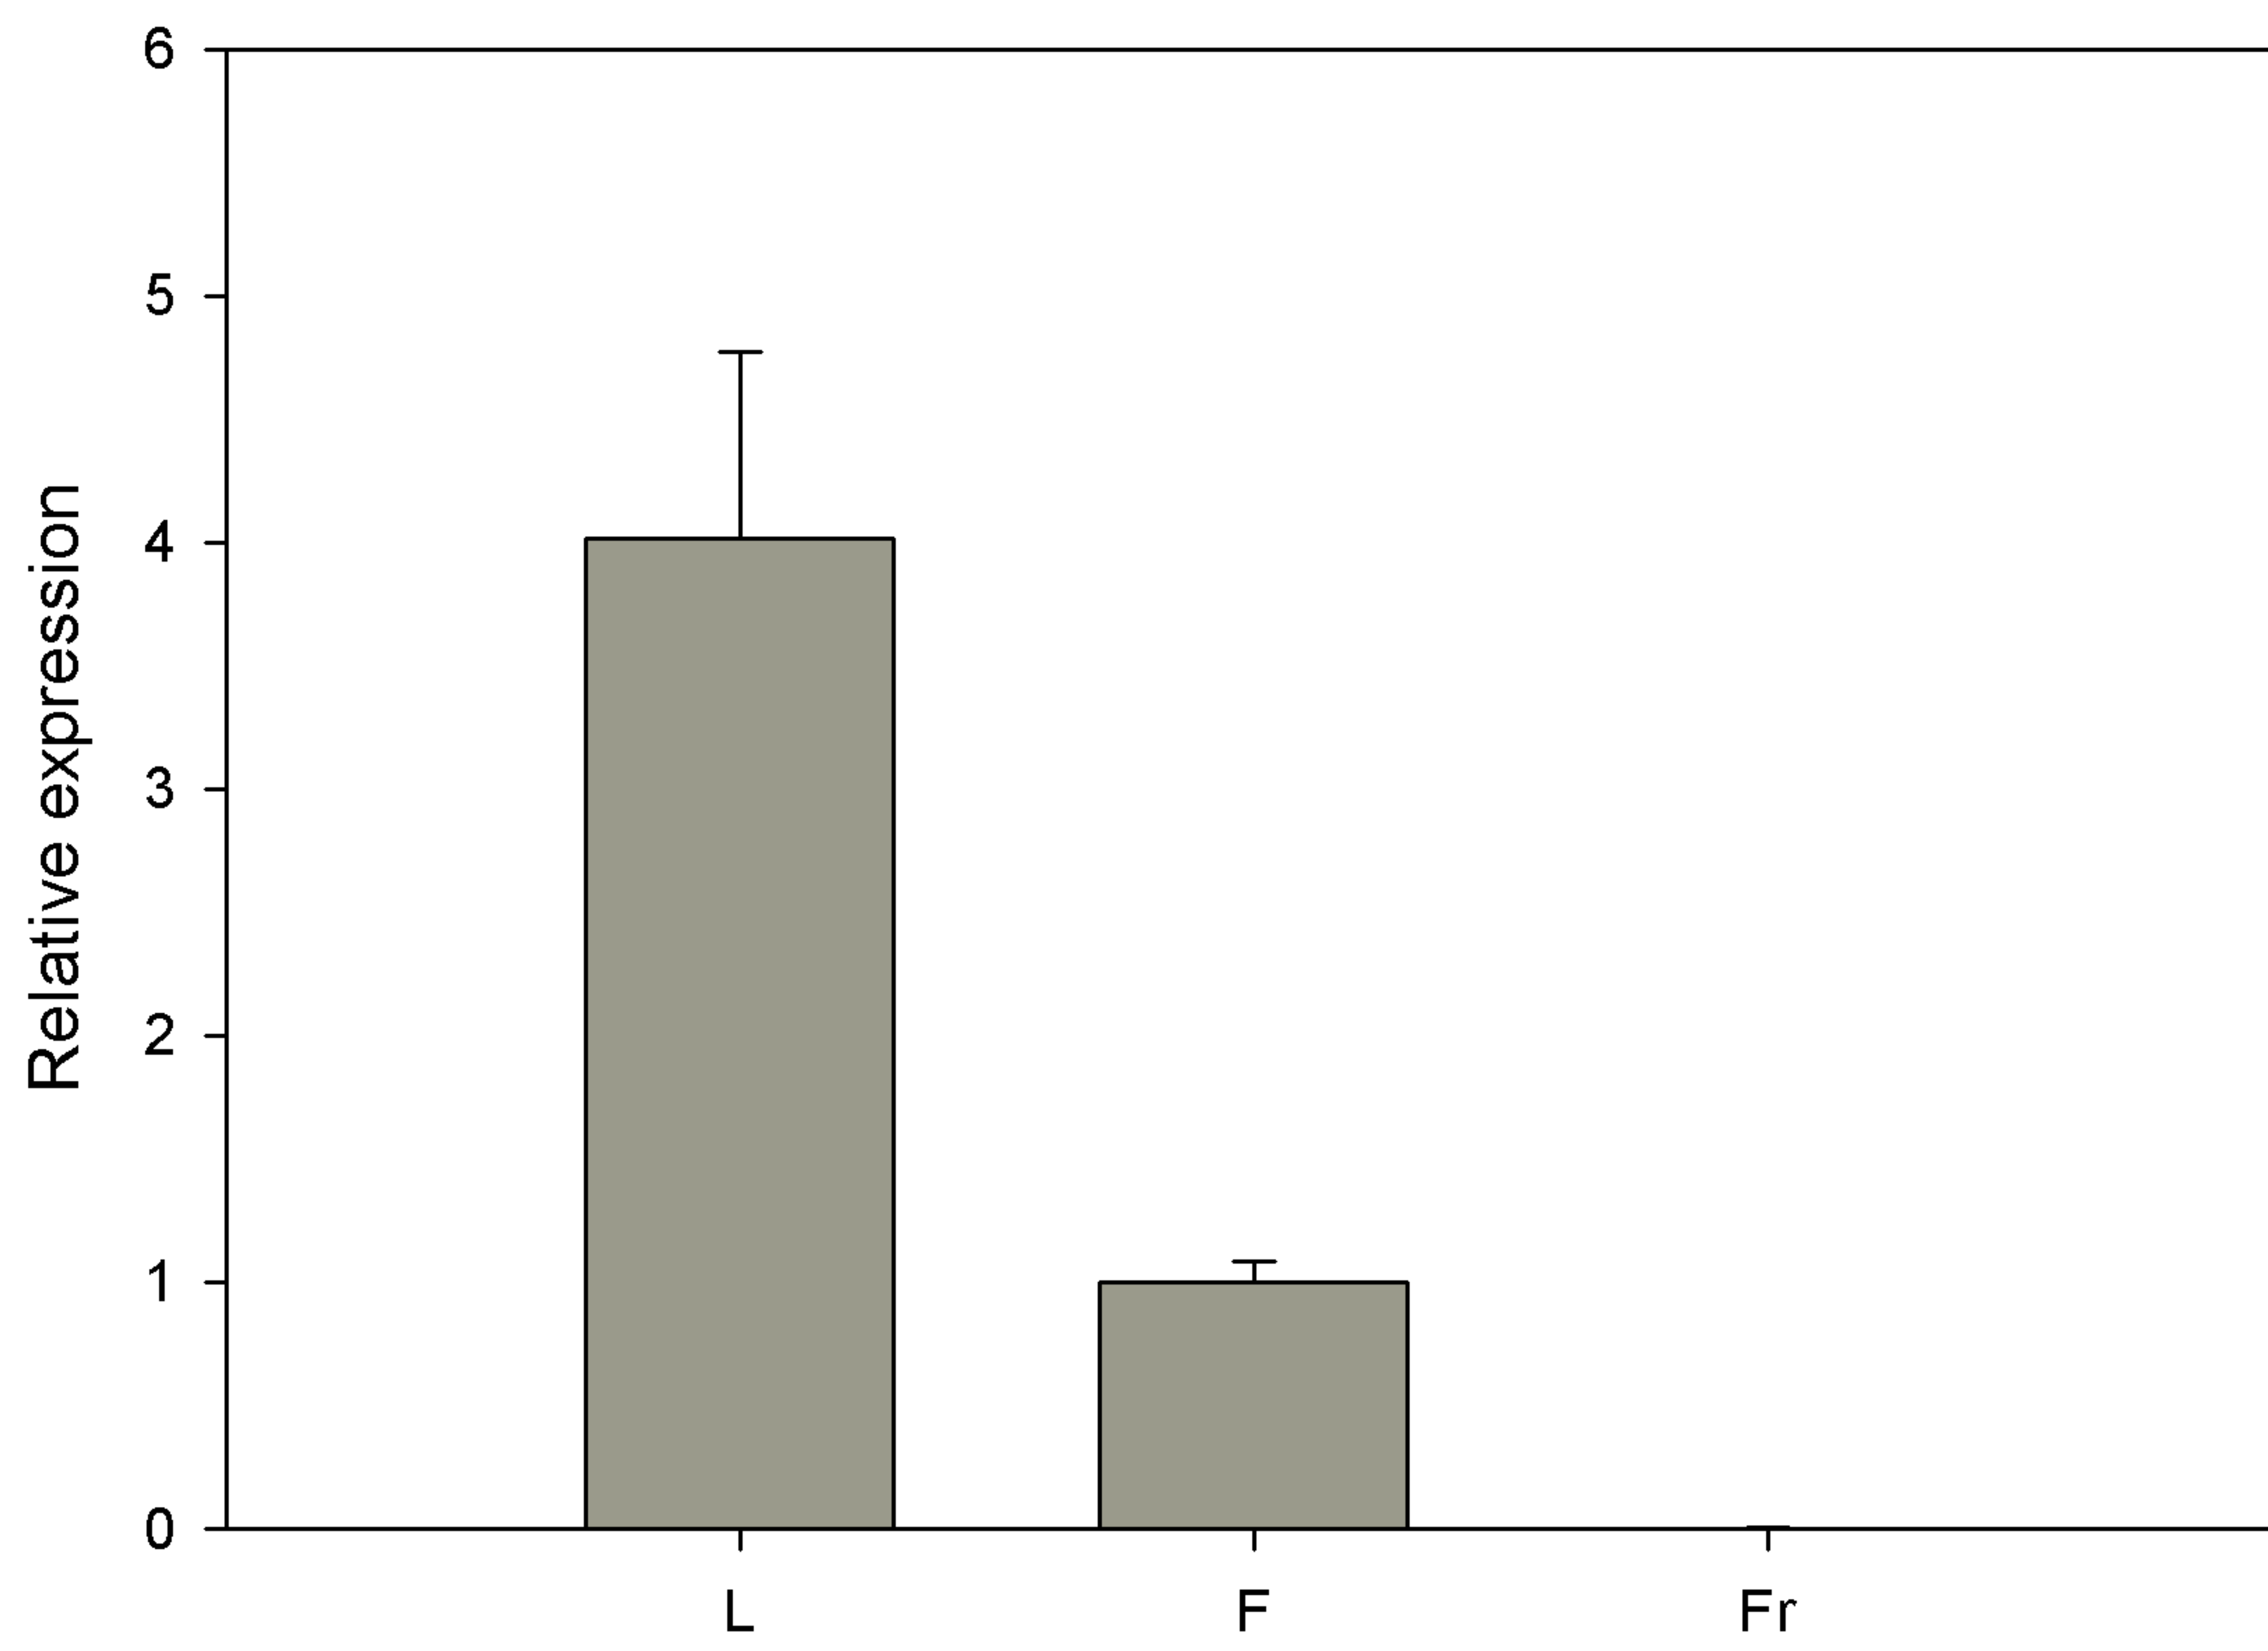

### Csi-miRN16

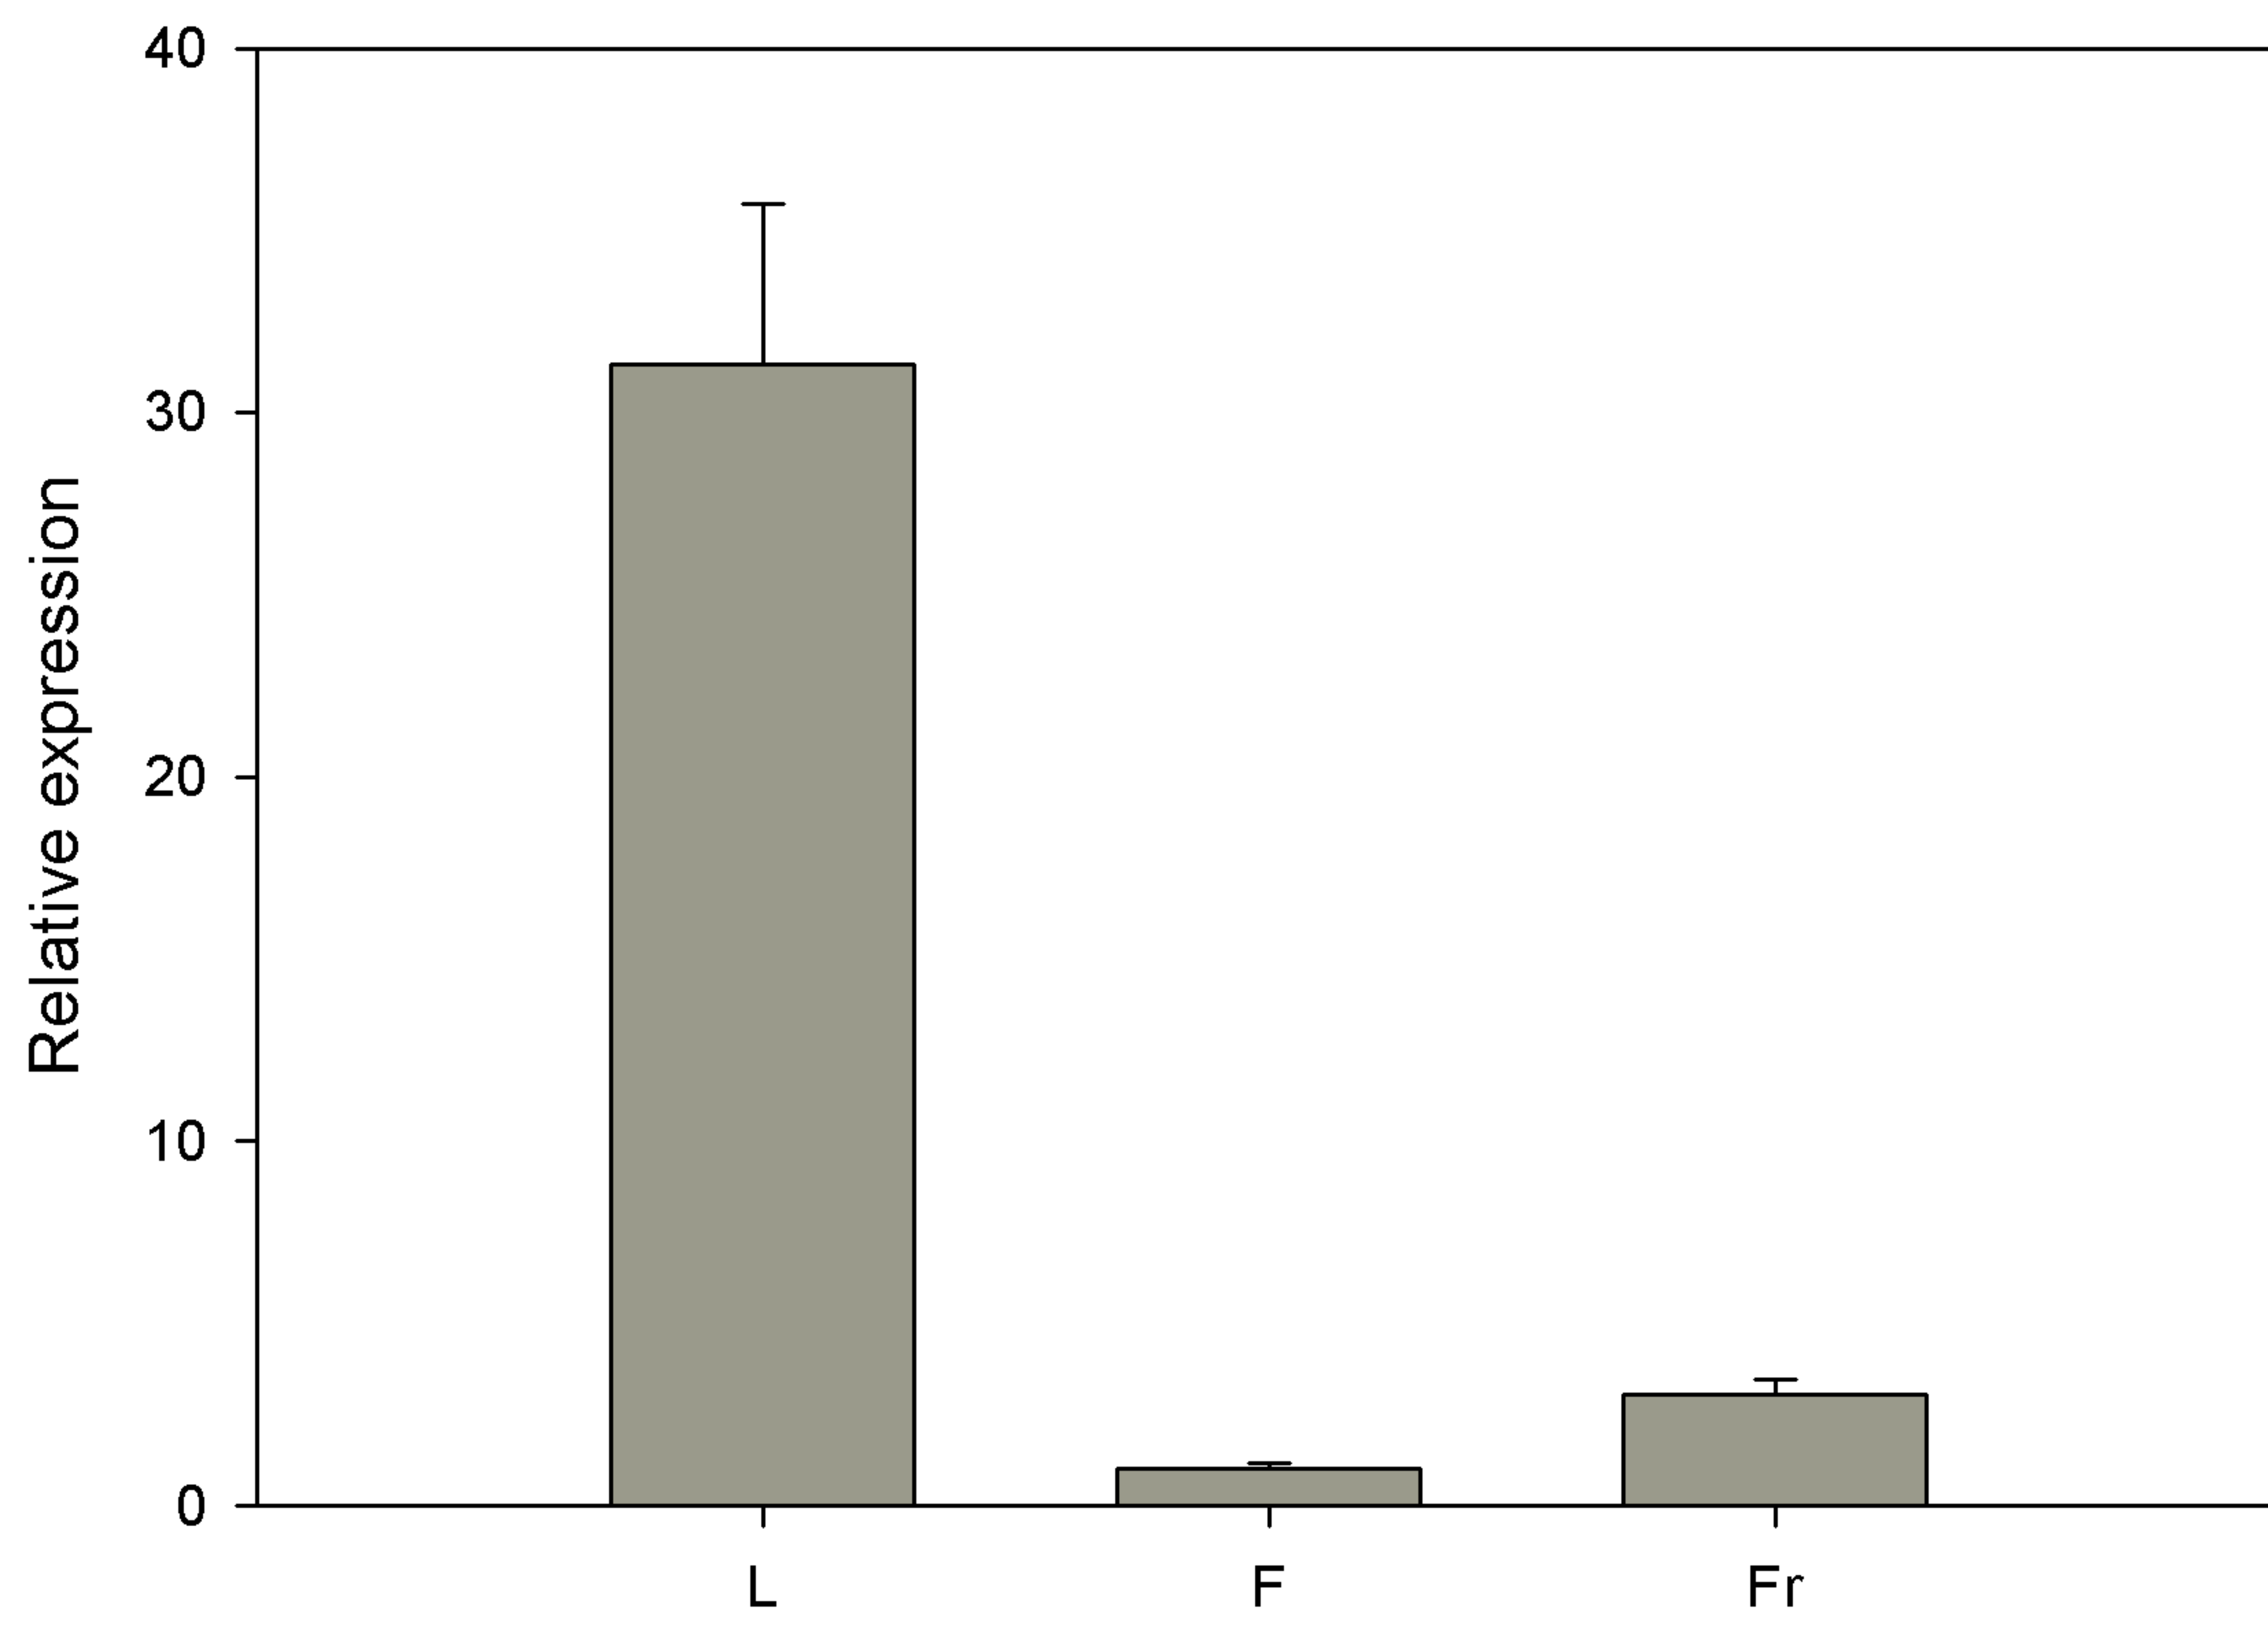

### Csi-miRN24

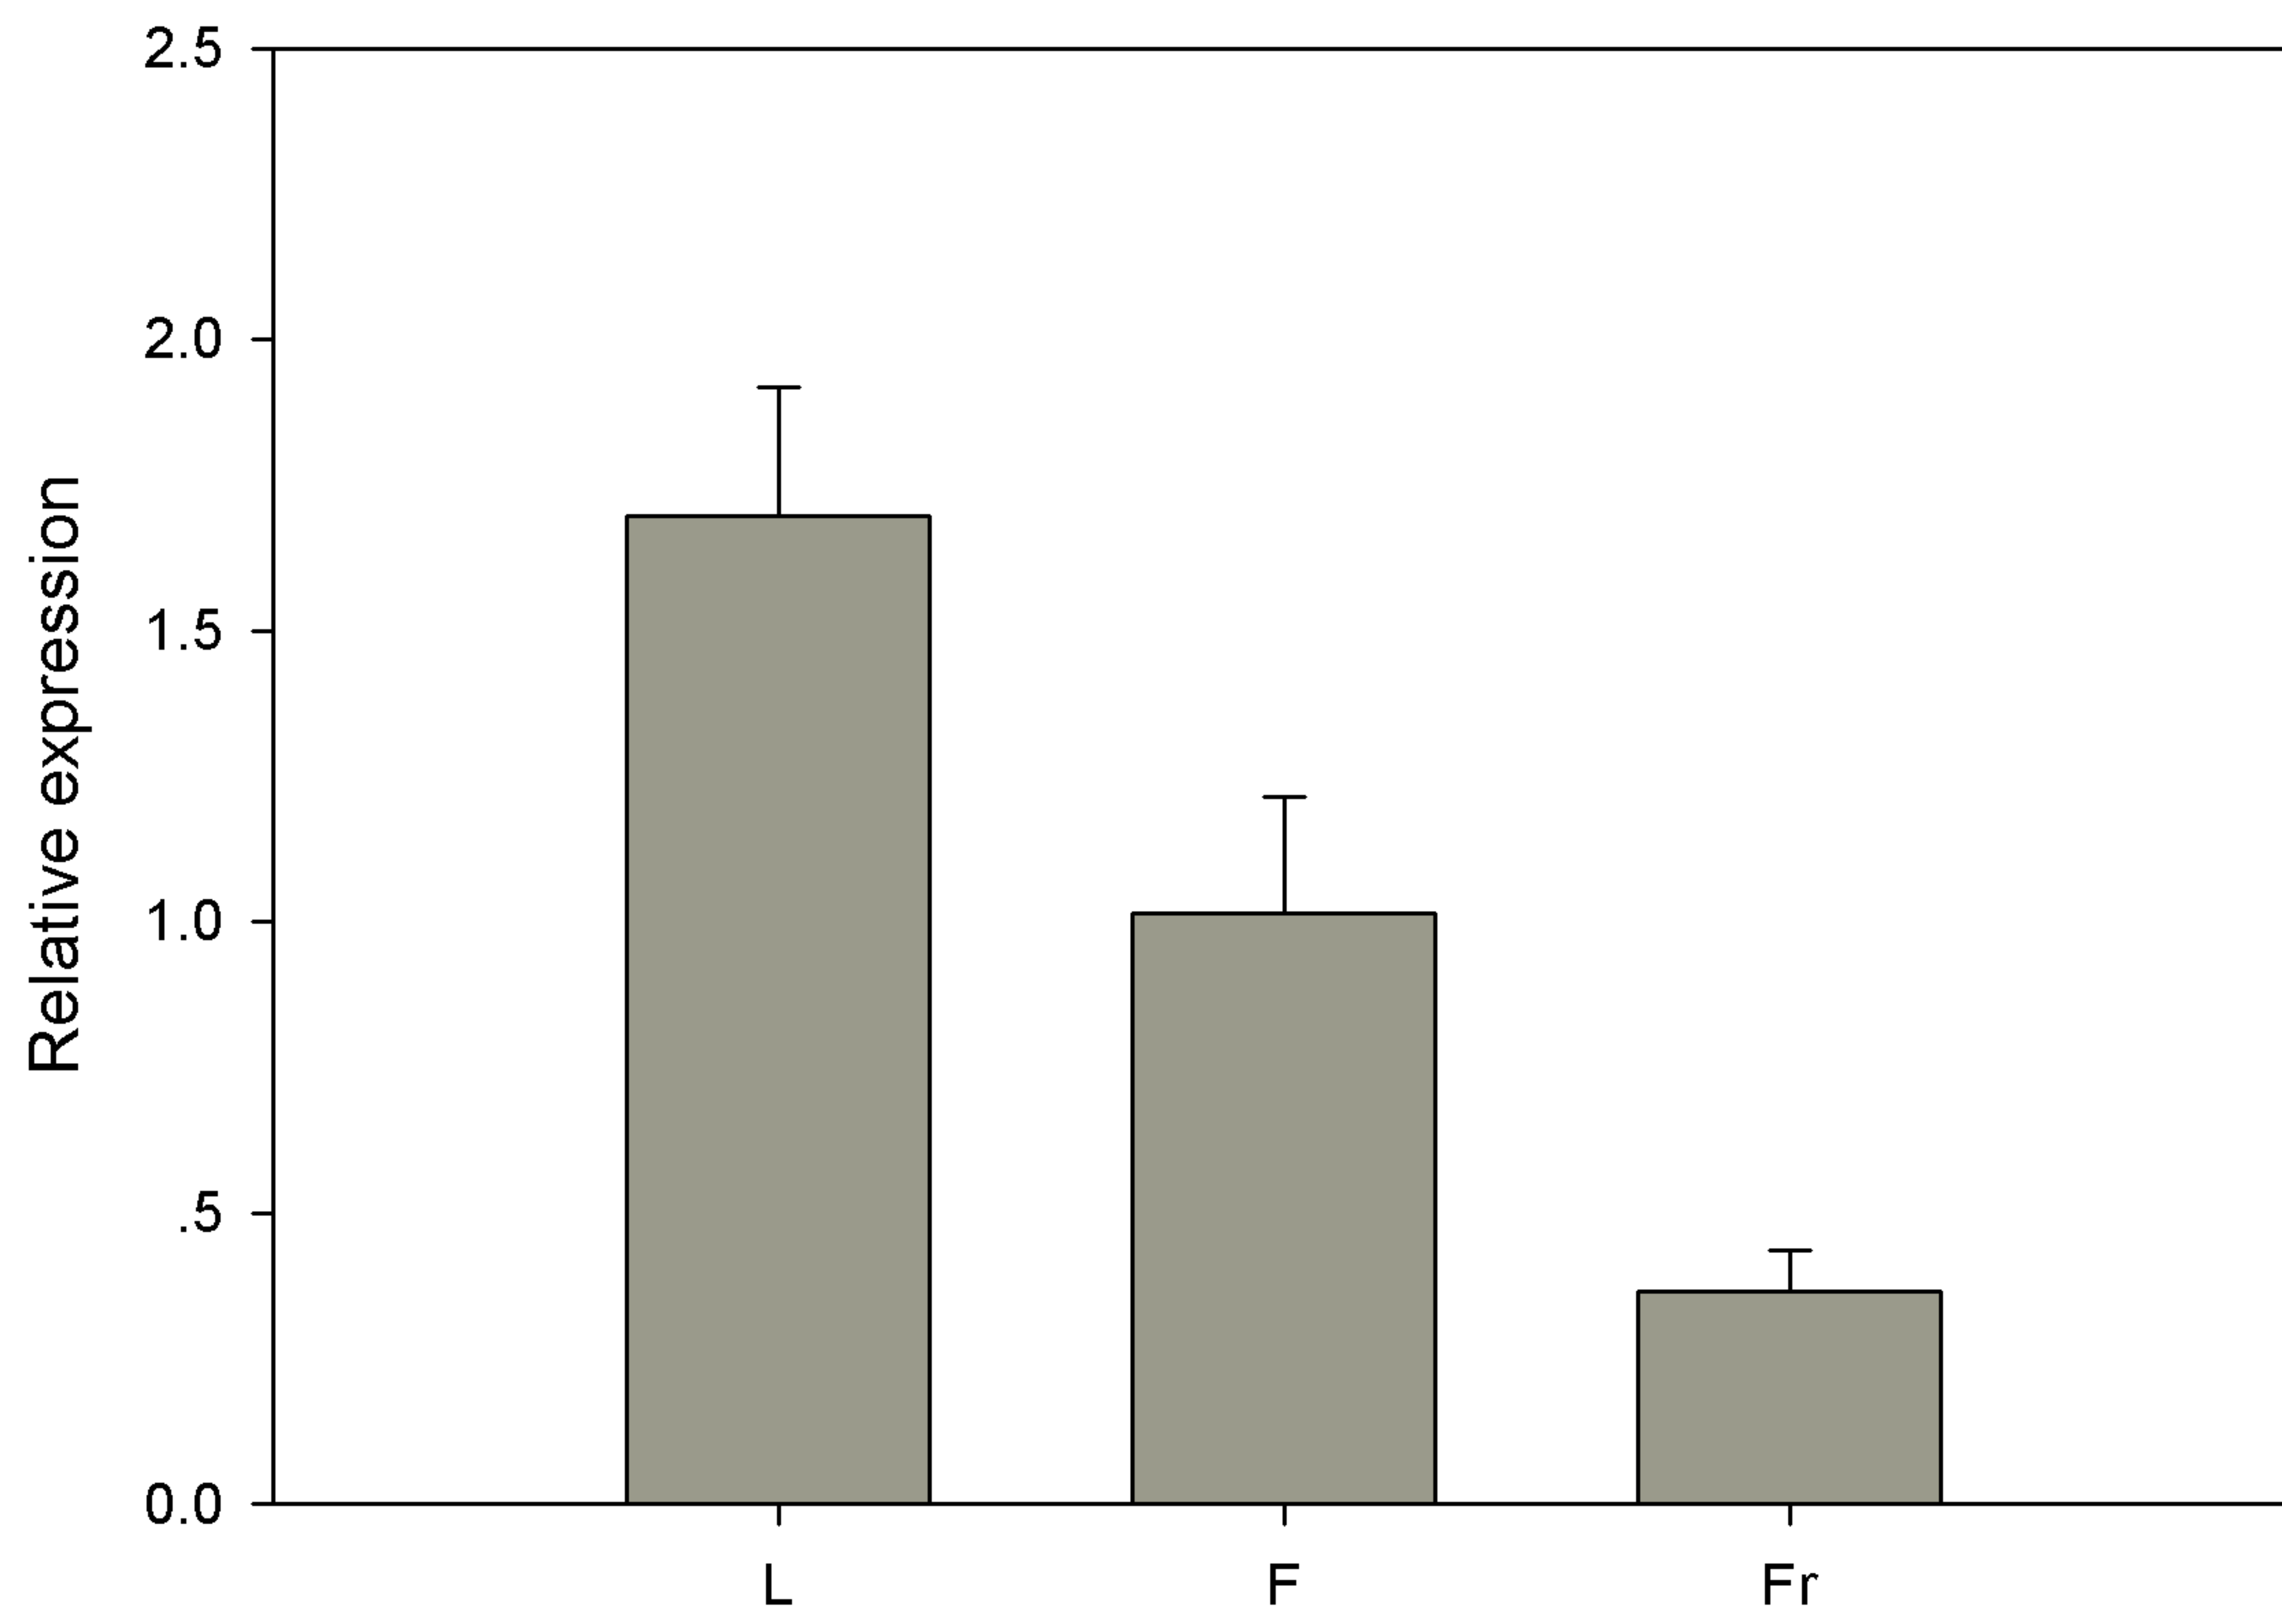

### Csi-miRN25

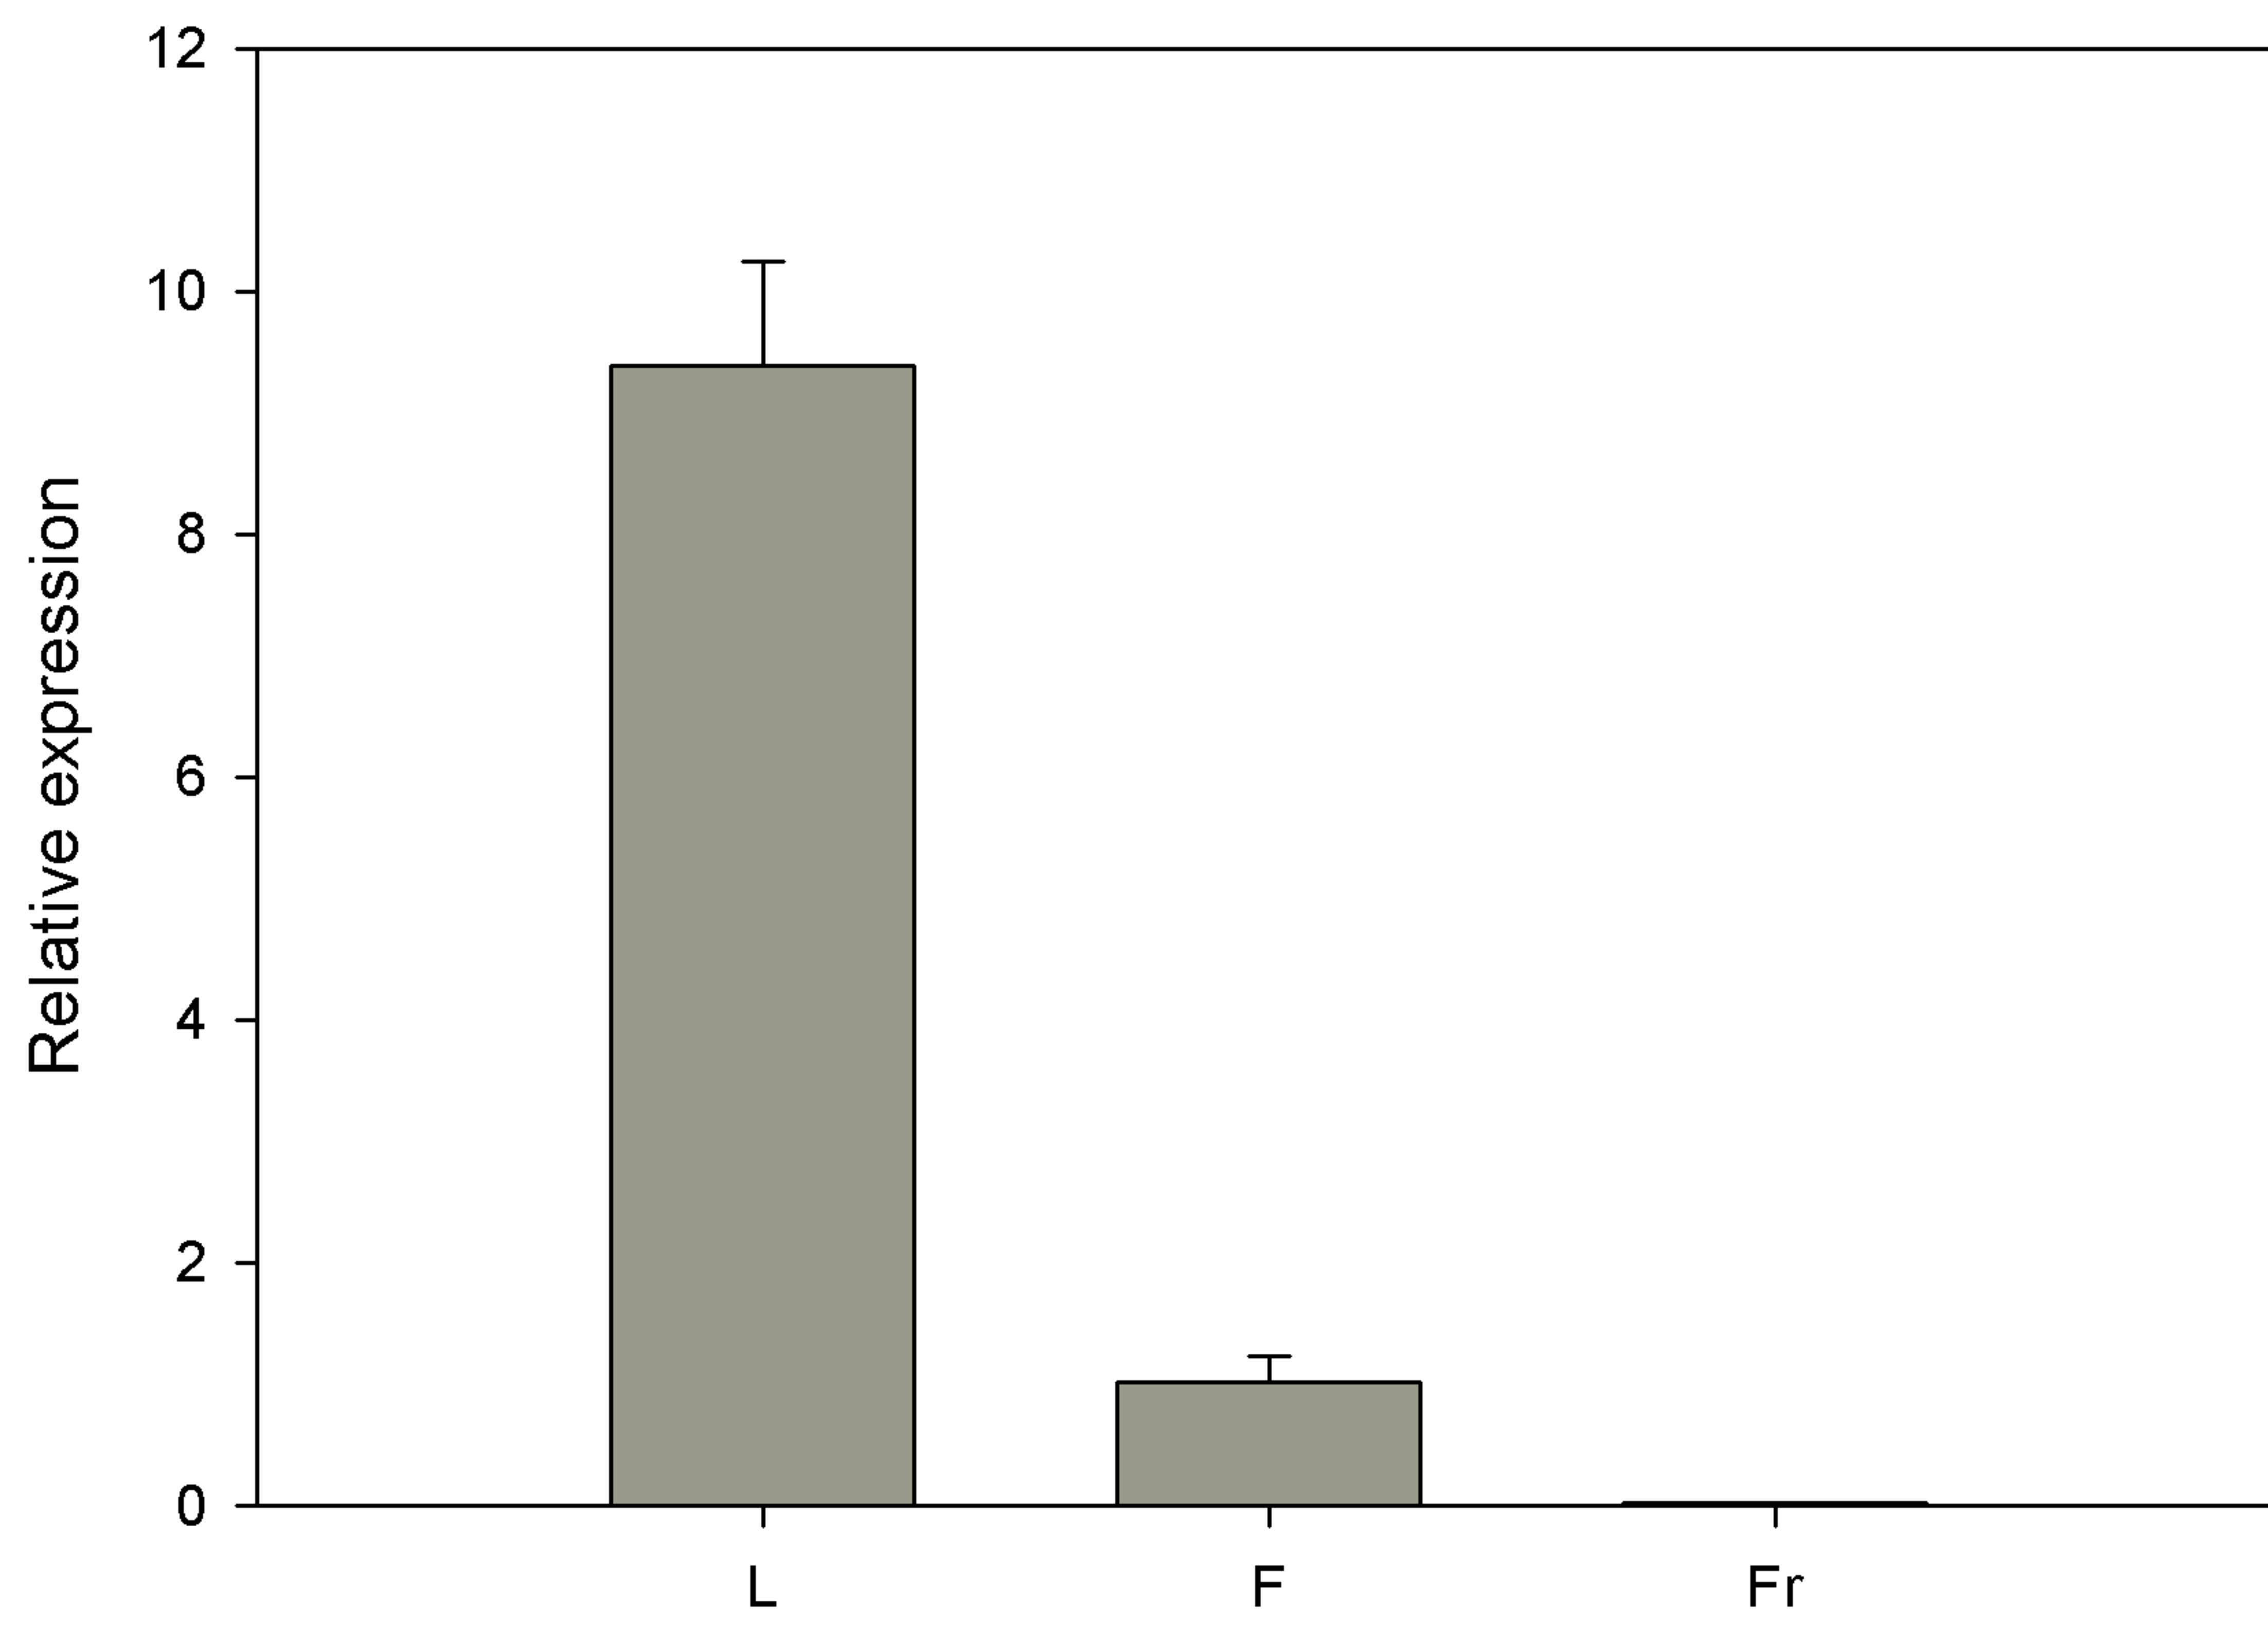

### Csi-miRN26

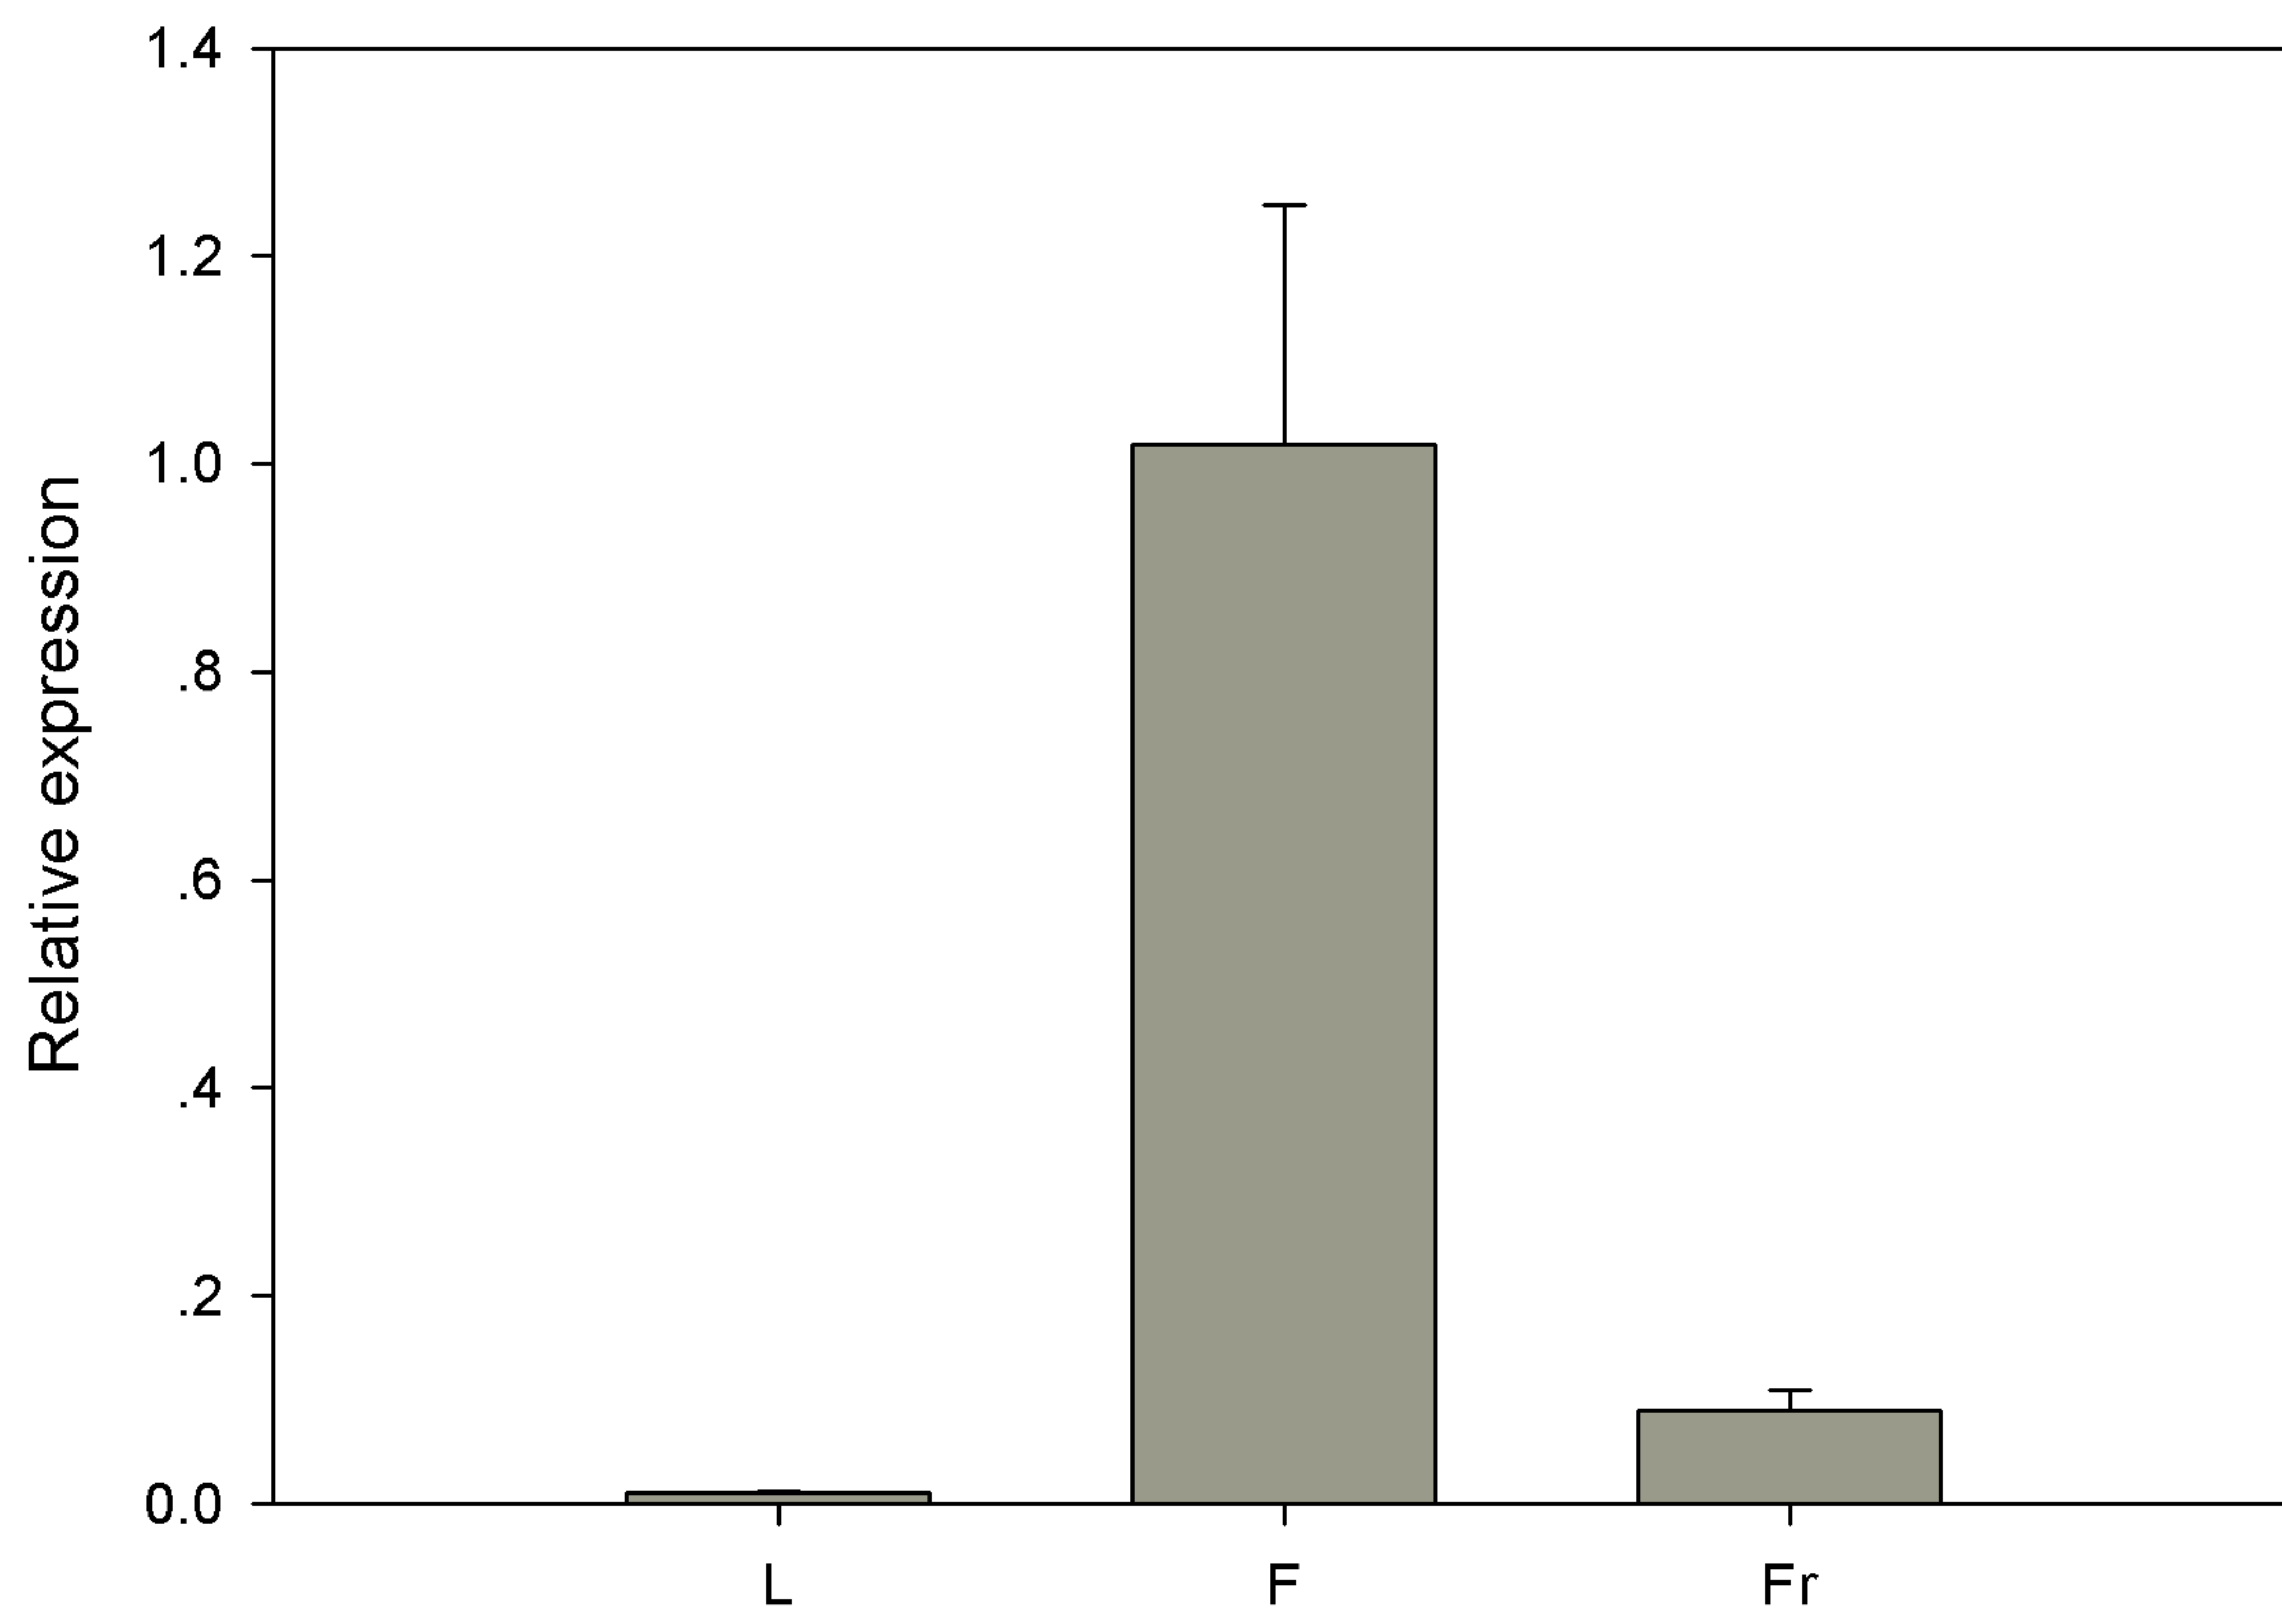

### Csi-miRN31

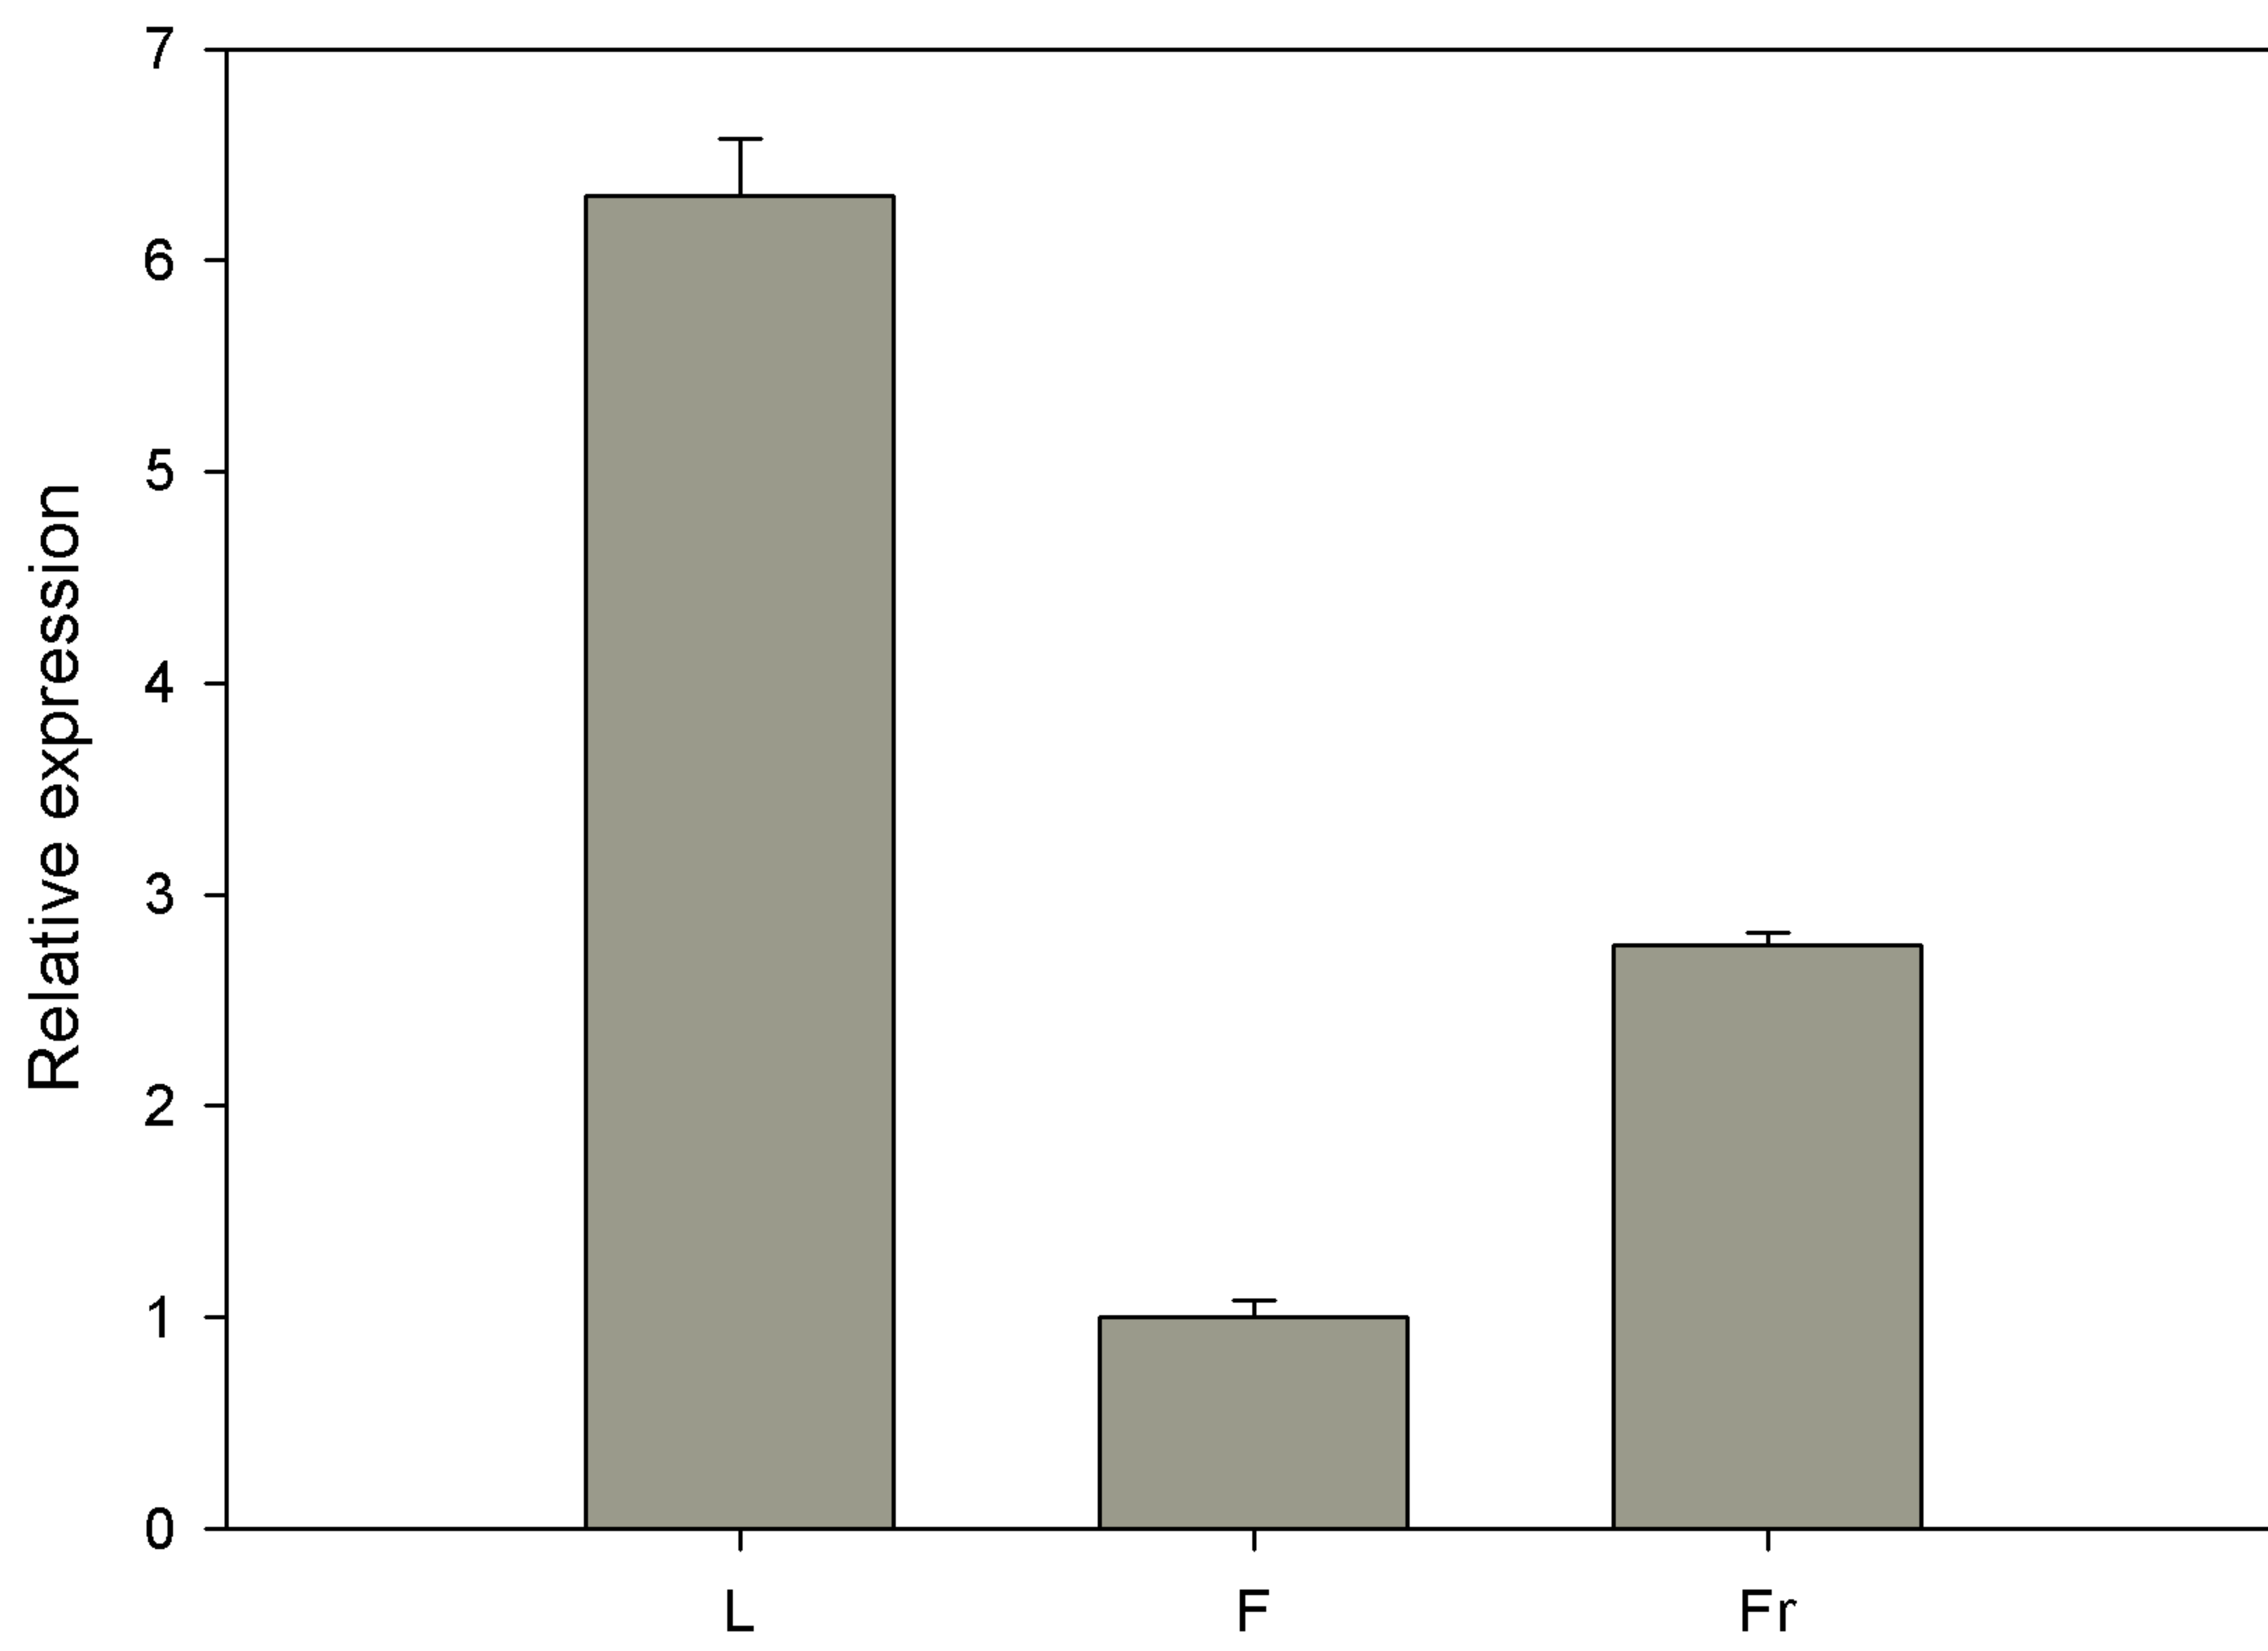

### Csi-miRN32

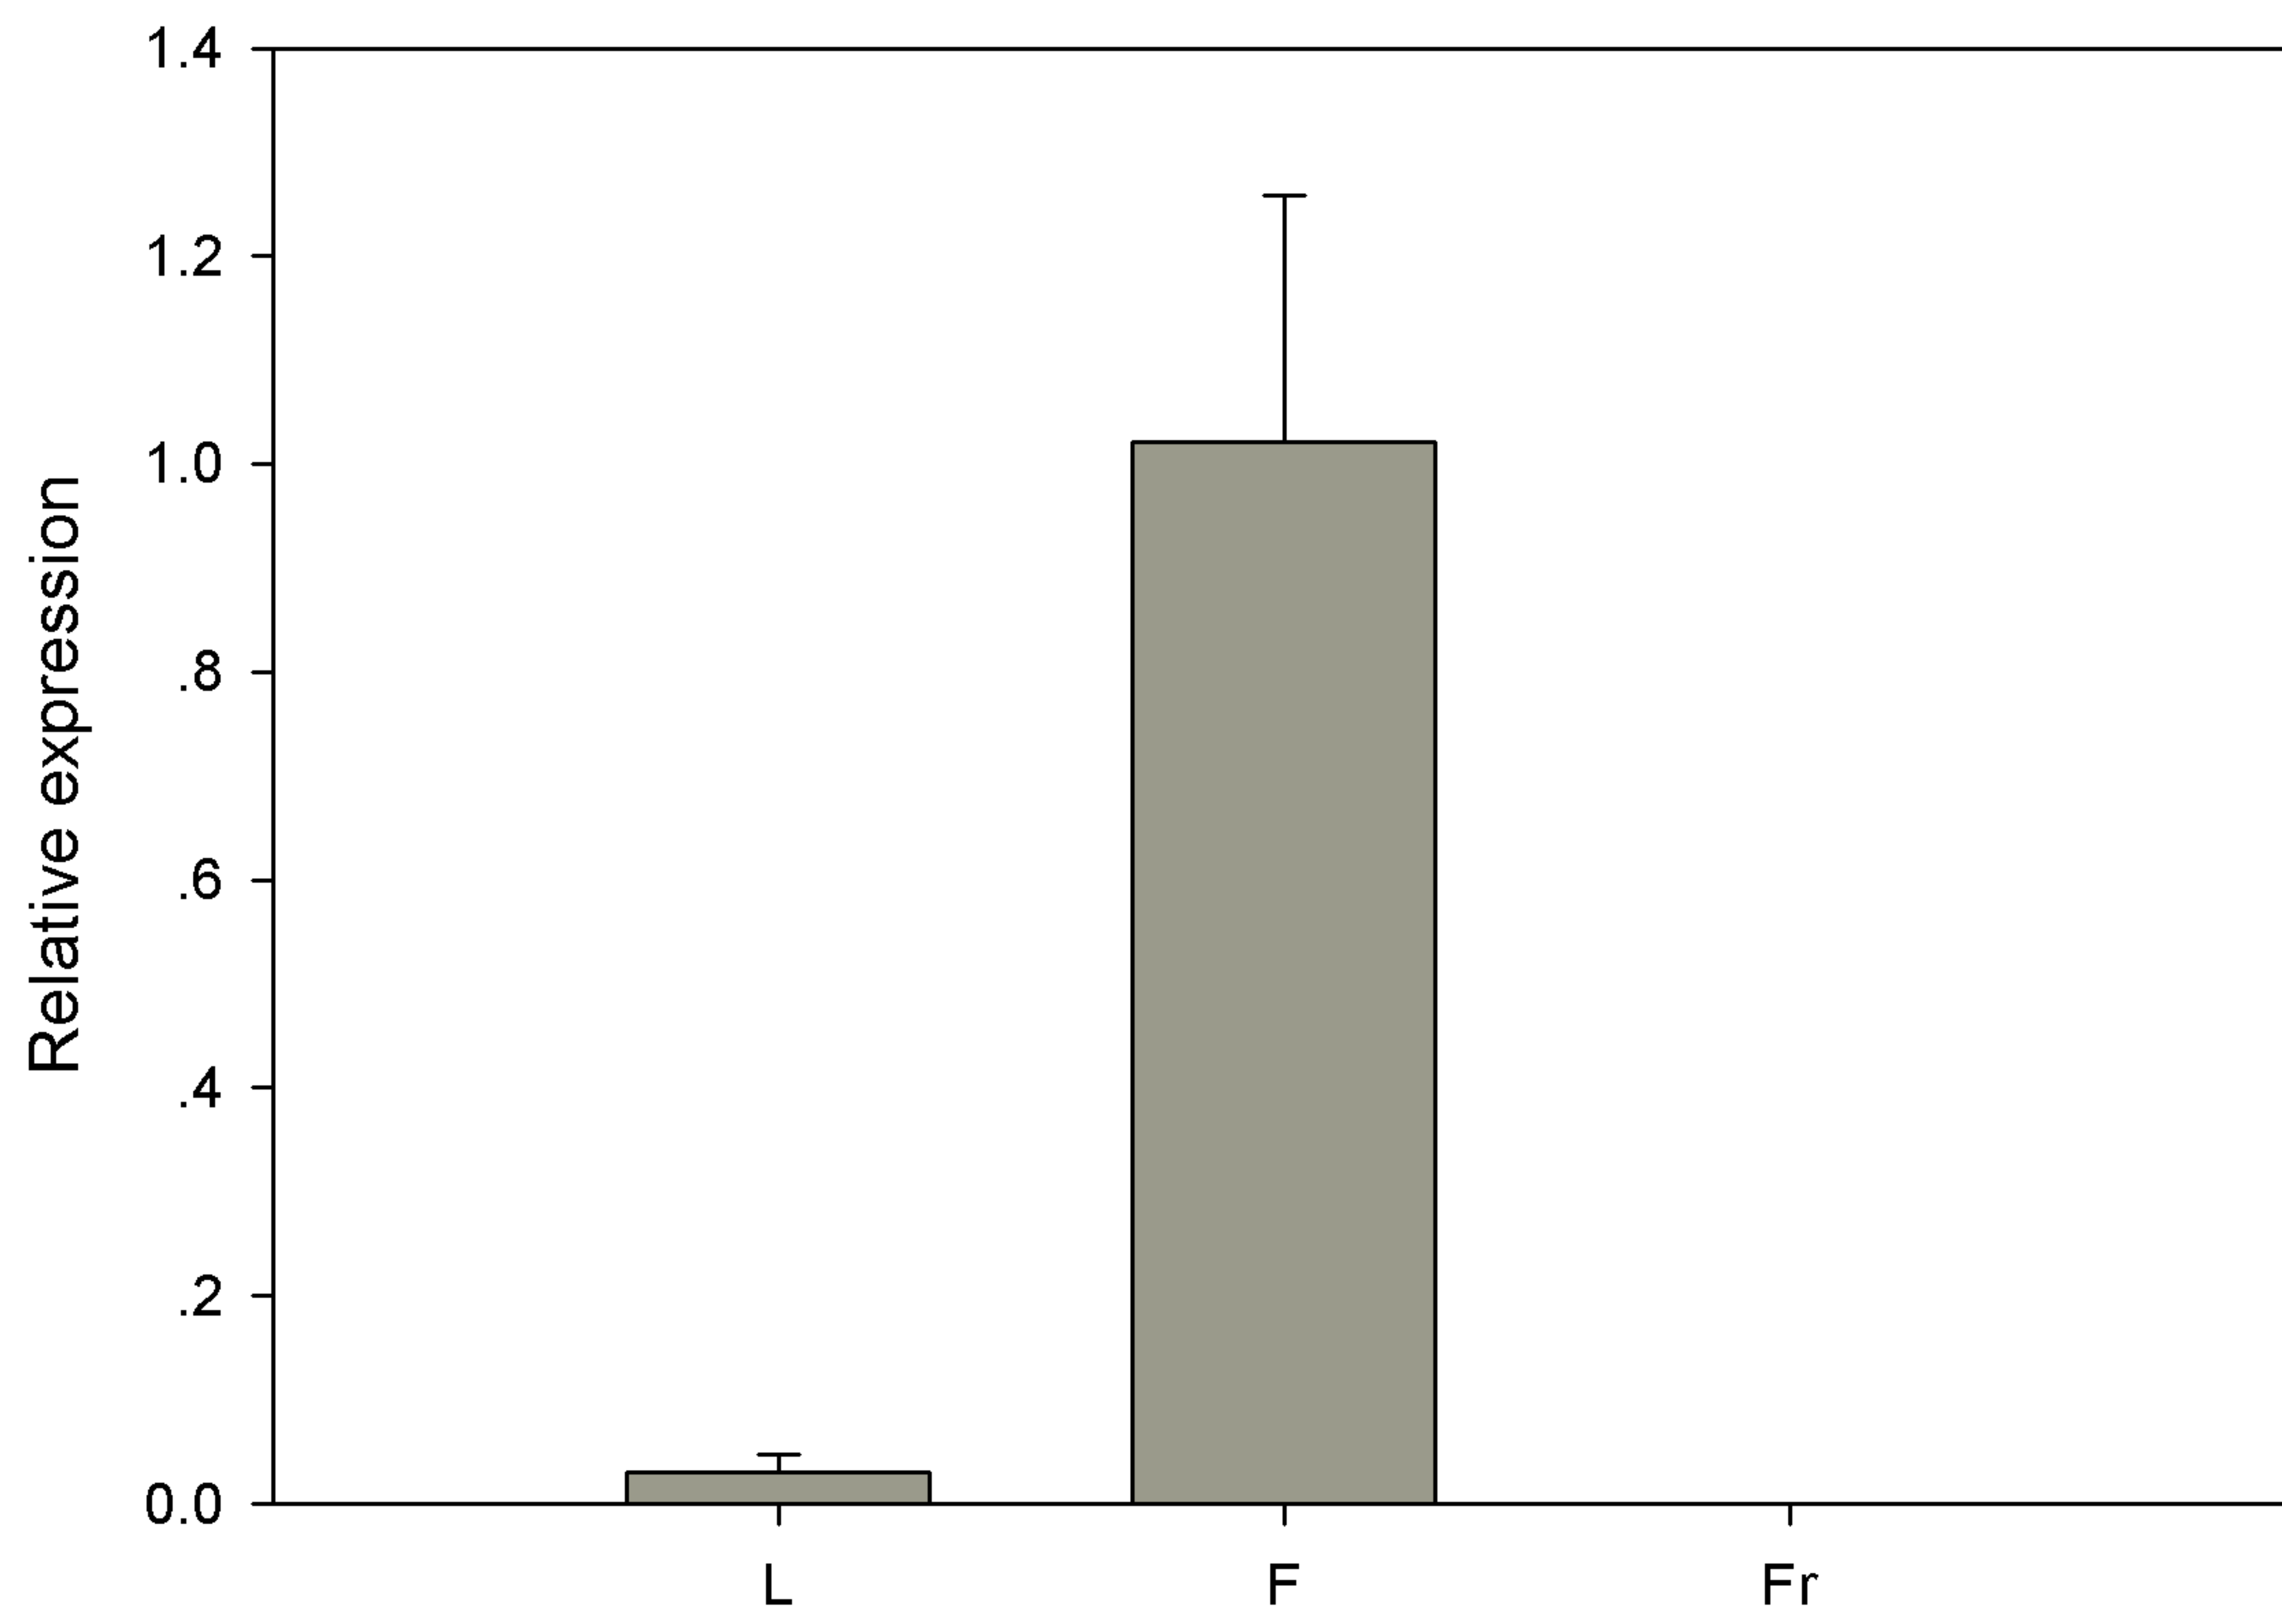

### Csi-miRN36

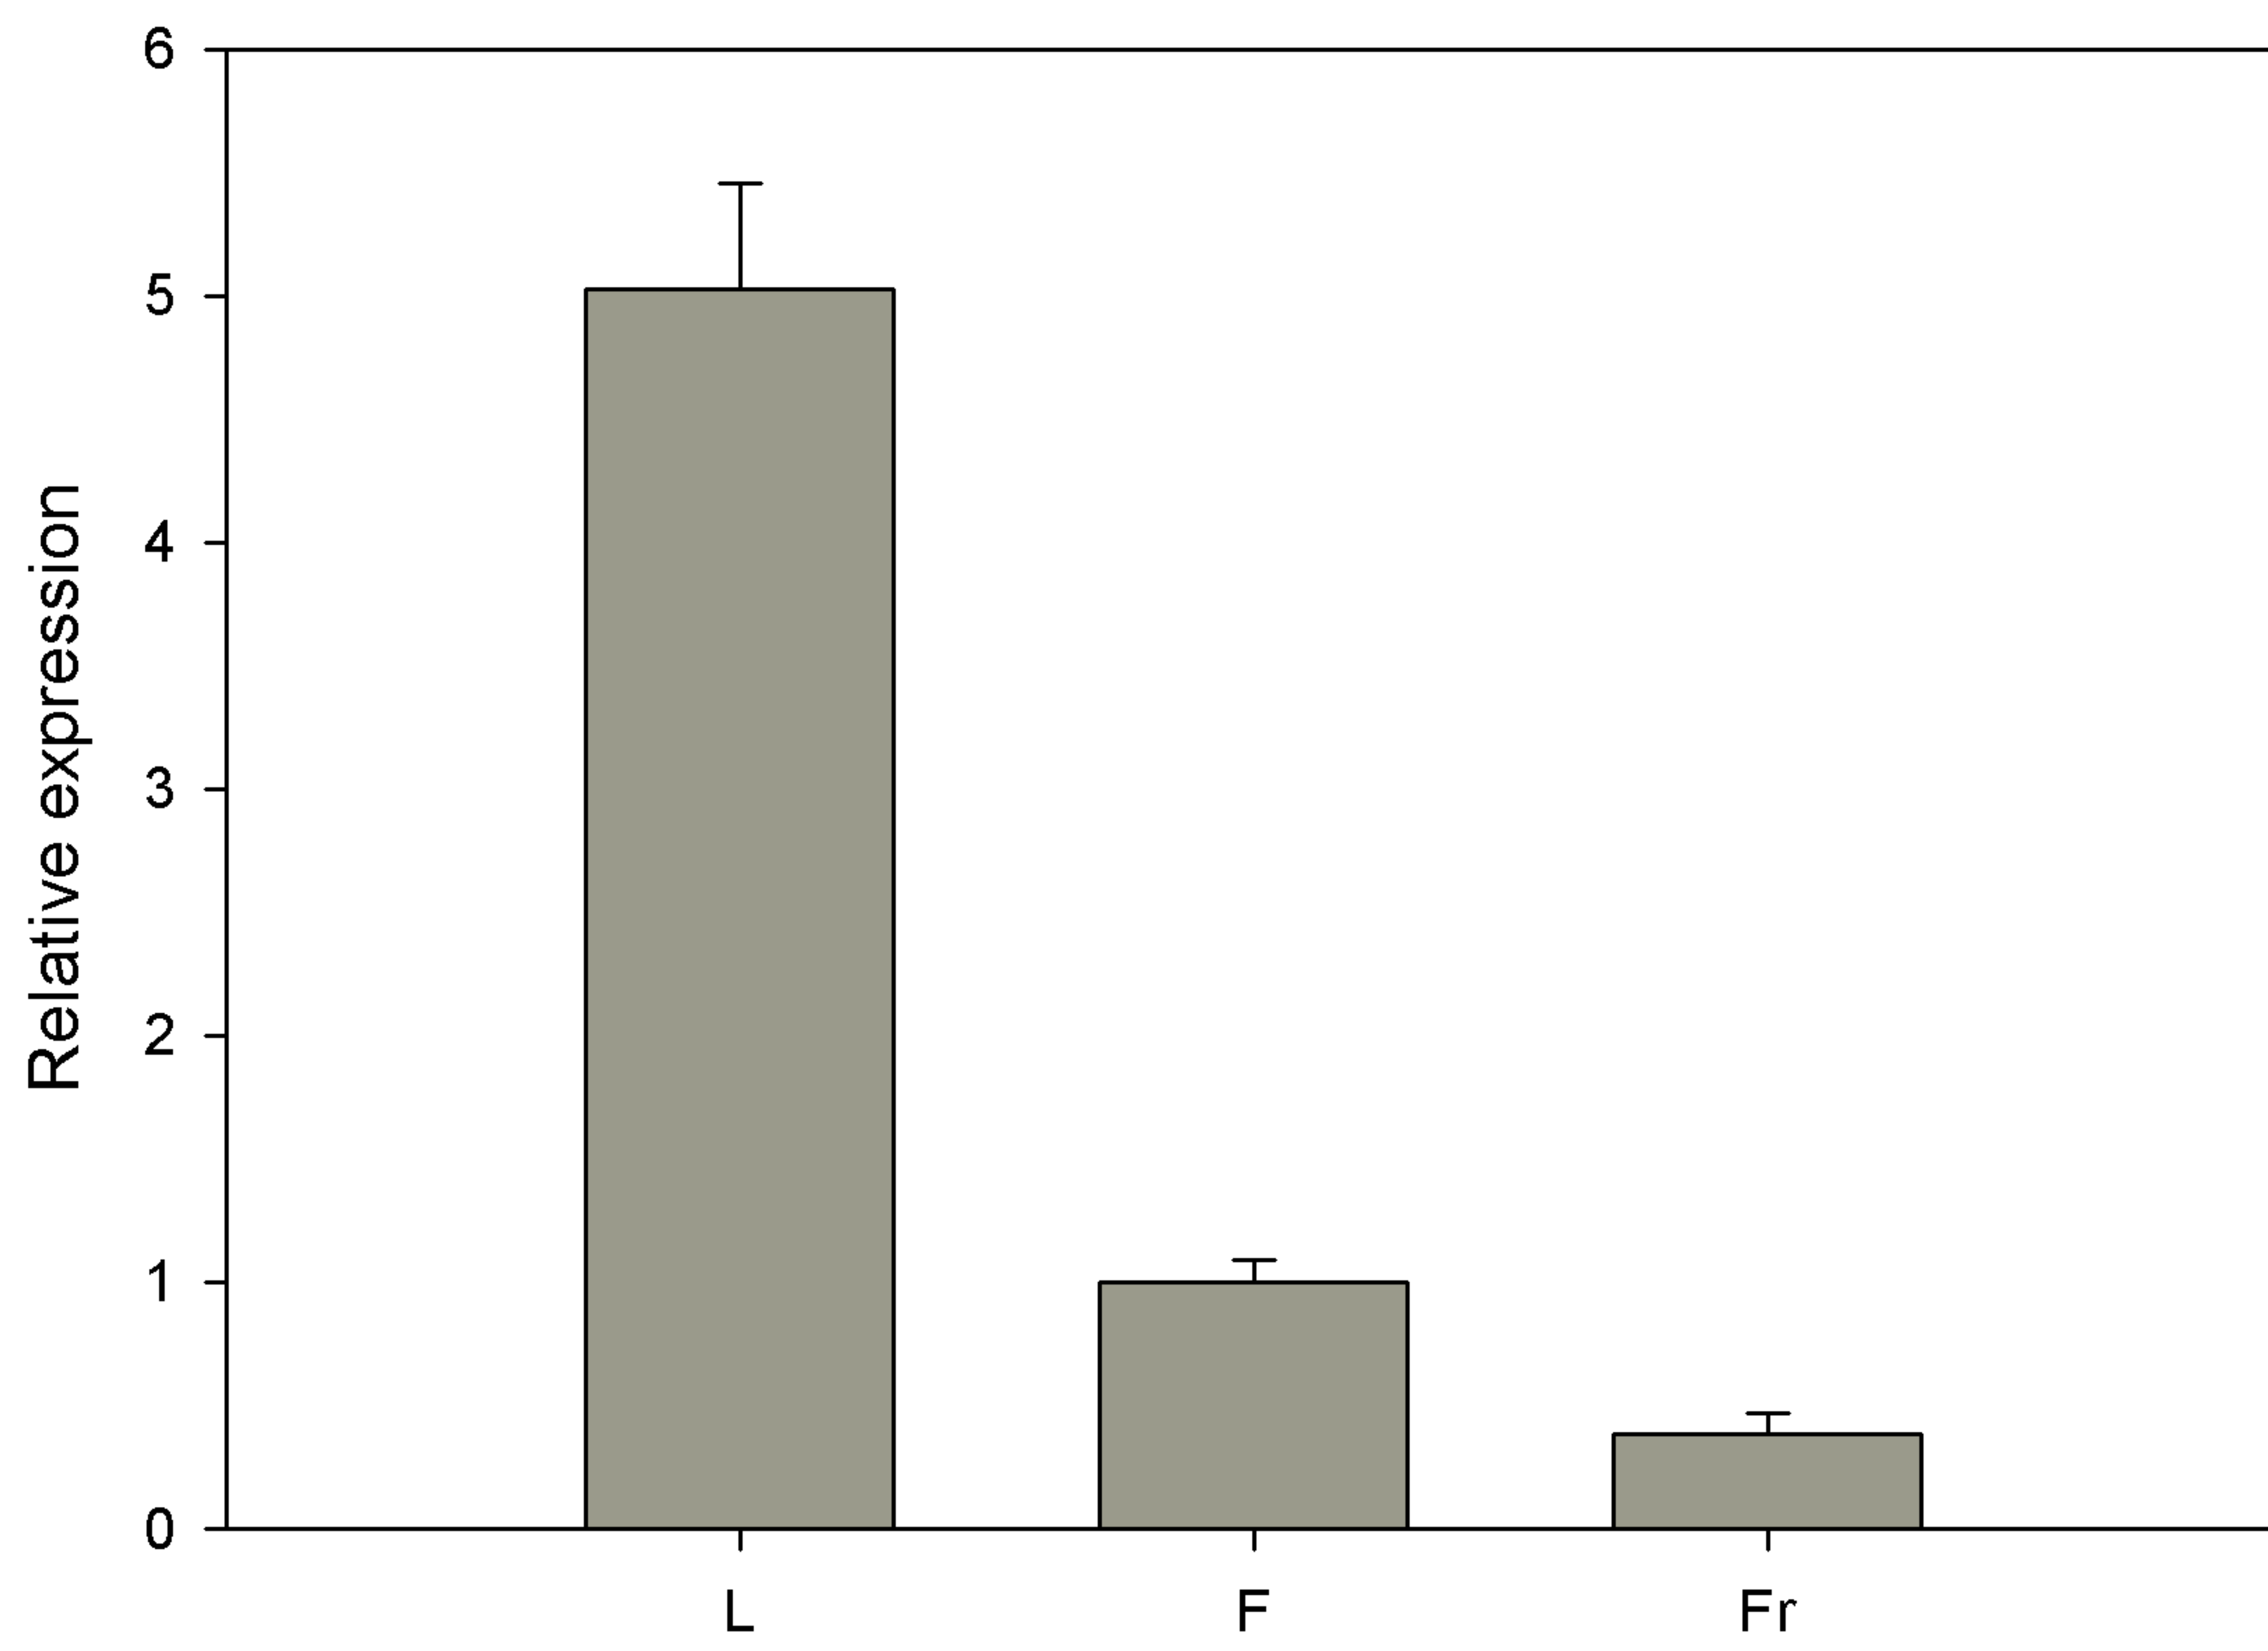



### Csi-miRN37

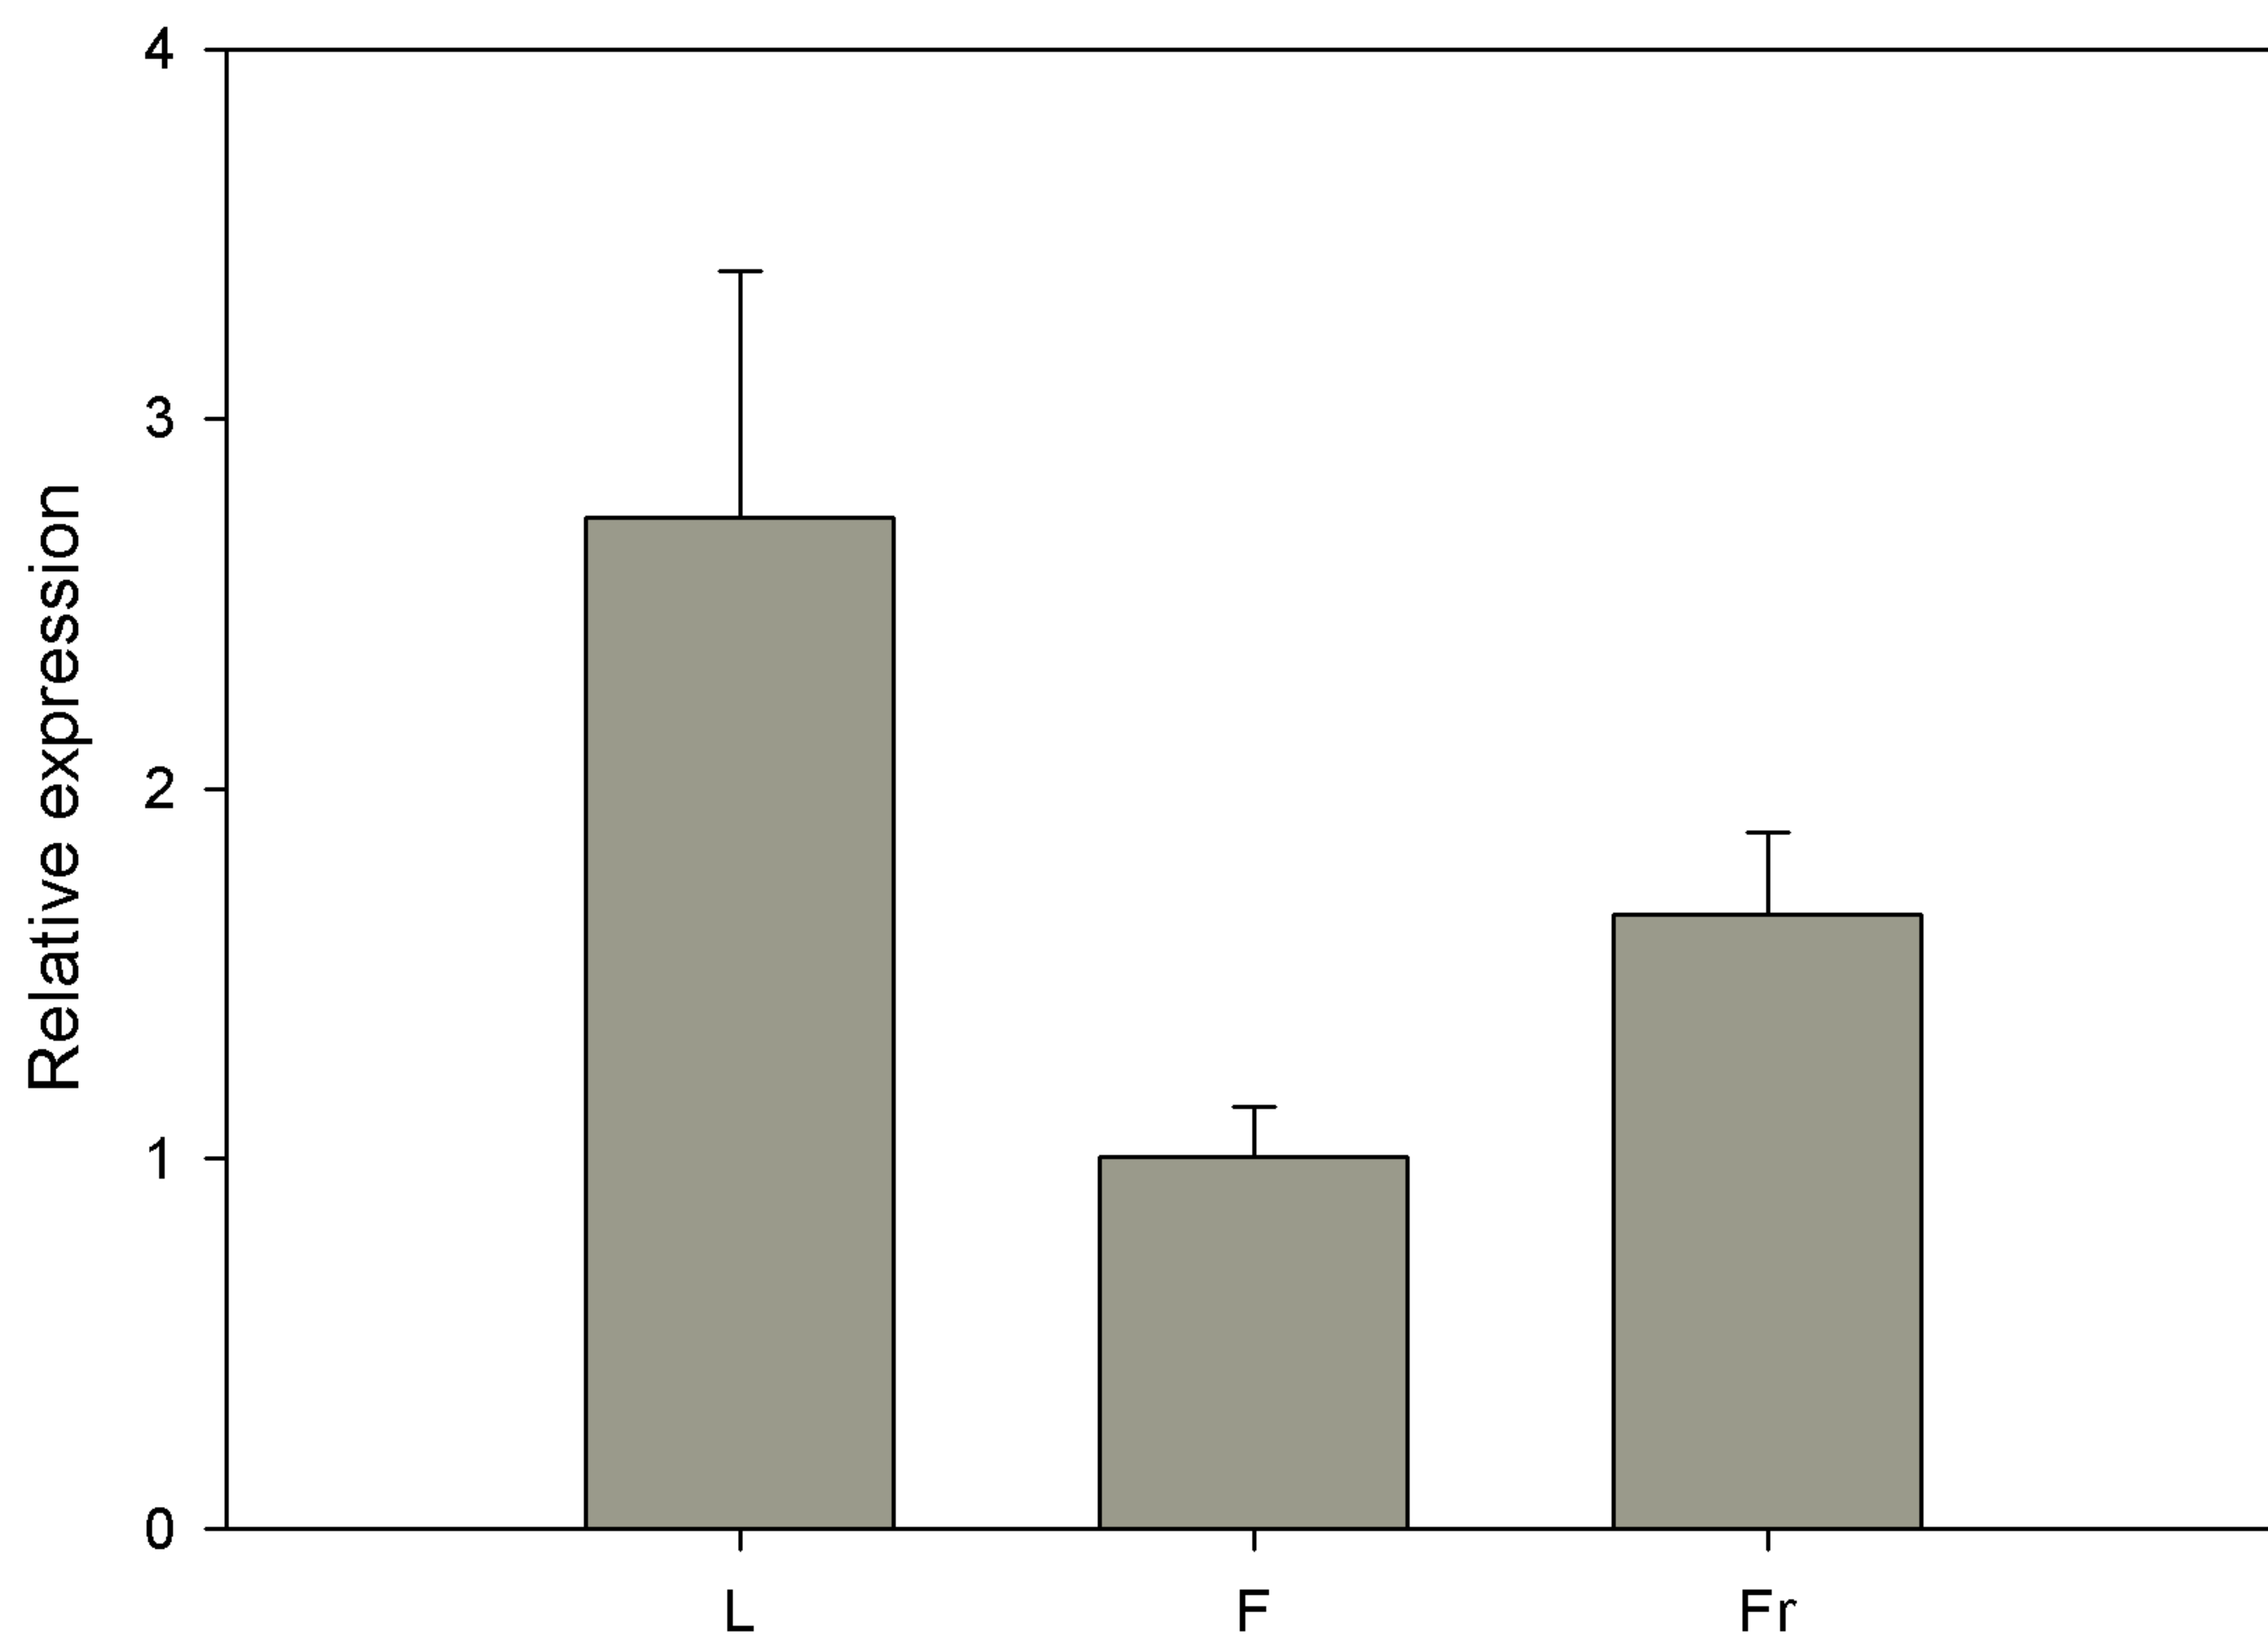

Supplement: 12864_2014_6413_MOESM11_ESM.pdf [file 12864_2014_6413_MOESM11_ESM.pdf]
