# Supplementary material for: Genome-wide comparison of microRNAs and their targeted transcripts among leaf, flower and fruit of sweet orange
Source: PubMed Central journal article supplement (PMC4158063; doi:10.1186/1471-2164-15-695), 2014-08-20
Supplement: 12864_2014_6413_MOESM2_ESM.pdf [file 12864_2014_6413_MOESM2_ESM.pdf]

Additional file 2: Normalized count<sup>a</sup> of all miRNAs in leaf, flower and fruit of sweet orange

| Name                       | Normalized count <sup>a</sup><br>in leaf | Normalized count <sup>a</sup><br>in flower | Normalized count <sup>a</sup><br>in fruit | sRNA sequence                 | Family        | Higher<br>expressed in |
|----------------------------|------------------------------------------|--------------------------------------------|-------------------------------------------|-------------------------------|---------------|------------------------|
| Csi-miR1092.2 <sup>b</sup> | 32.73                                    | 91.87                                      | 8.96                                      | TTCCACCAAAGCATTTCATTTCC       | miR1092       | Flower                 |
| Csi-miR1432a               | 50.22                                    | 8.86                                       | 0                                         | TGCAGGTGAGATGATACCGTCA        | miR1432       | Leaf                   |
| Csi-miR1446                | 59.36                                    | 120.83                                     | 592.03                                    | CGAACTCTCTCCCTCAACGGC         | miR1446       | Fruit                  |
| Csi-miR1507a.2             | 1.28                                     | 2.16                                       | 0                                         | ATGGCATTATGTATAGAATGAGGA      | miR1507       |                        |
| Csi-miR1515                | 19.56                                    | 7.67                                       | 19.6                                      | TCATTTTTGCGTGCAATGATCC        | miR1515       |                        |
| Csi-miR156a.1              | 1514.38                                  | 279.61                                     | 62.17                                     | TTGACAGAAGAGAGTGAGCAC         | miR156        | Leaf                   |
| <b>Csi-miR156a.2</b>       | <b>2718.97</b>                           | <b>487.01</b>                              | <b>283.97</b>                             | <b>TGACAGAAGAGAGTGAGCAC</b>   | <b>miR156</b> | <b>Leaf</b>            |
| Csi-miR156b.1              | 1628.79                                  | 378.5                                      | 407.19                                    | CTGACAGAAGAGAGTGAGCAC         | miR156        | Leaf                   |
| Csi-miR156c.1              | 329.16                                   | 93.71                                      | 54.89                                     | TGACAGAAGAGAGTGAGCACA         | miR156        | Leaf                   |
| Csi-miR156d                | 2.46                                     | 37.29                                      | 91.3                                      | TGACAGAAGATAGAGAGCGC          | miR156        | Flower                 |
| Csi-miR156e                | 54.65                                    | 2967.91                                    | 1224.38                                   | GTGACAGAAGATAGAGAGCGC         | miR156        | Flower                 |
| Csi-miR156f.2              | 22.41                                    | 3.57                                       | 1.12                                      | ATGACAGAAGAGAGAGAGTAC         | miR156        | Leaf                   |
| Csi-miR156g.1              | 27031.96                                 | 12066.94                                   | 497.37                                    | TTGACGGAAGATAGAGAGCAC         | miR156        | Leaf                   |
| <b>Csi-miR156g.2</b>       | <b>8893.56</b>                           | <b>846.28</b>                              | <b>586.98</b>                             | <b>TGACGGAAGATAGAGAGCAC</b>   | <b>miR156</b> | <b>Leaf</b>            |
| Csi-miR156h                | 0                                        | 1.19                                       | 0                                         | TTGACAGAAGAGAGAGAGCAC         | miR156        | Flower                 |
| Csi-miR159                 | 165.61                                   | 40.31                                      | 272.77                                    | TTTGGATTGAAGGGAGCTCTA         | miR159        |                        |
| Csi-miR159b                | 0                                        | 9.51                                       | 0                                         | ATTGGAGTGAAGGGAGCTCCA         | miR159        | Flower                 |
| Csi-miR160a-3p             | 87.87                                    | 135.43                                     | 5.6                                       | GCGTATGAGGAGCCATGCATA         | miR160        |                        |
| <b>Csi-miR160a-5p</b>      | <b>11.11</b>                             | <b>16.64</b>                               | <b>0</b>                                  | <b>TGCCTGGCTCCCTGTATGCCA</b>  | <b>miR160</b> |                        |
| Csi-miR160b-3p             | 647.21                                   | 87.98                                      | 0                                         | GCGTACGAGGAGCCAAGCATA         | miR160        | Leaf                   |
| <b>Csi-miR160b-5p</b>      | <b>4.52</b>                              | <b>1.51</b>                                | <b>0</b>                                  | <b>TGCCTGGCTCCCTGTATGCCG</b>  | <b>miR160</b> | <b>Leaf</b>            |
| Csi-miR160c.1              | 0.88                                     | 1.51                                       | 3.36                                      | AGCGTGCGAGGAGCCATGCAT         | miR160        | Fruit                  |
| <b>Csi-miR160c.2</b>       | <b>0.59</b>                              | <b>0.65</b>                                | <b>1.12</b>                               | <b>AGCGTGCGAGGAGCCATGCATG</b> | <b>miR160</b> |                        |
| Csi-miR162-3p.1            | 115.58                                   | 23.13                                      | 341.1                                     | TCGATAAACCTCTGCATCCAG         | miR162        | Fruit                  |
| <b>Csi-miR162-3p.2</b>     | <b>5.01</b>                              | <b>1.08</b>                                | <b>6.16</b>                               | <b>GATAAACCTCTGCATCCAG</b>    | <b>miR162</b> |                        |

|                         |                |               |              |                               |               |               |
|-------------------------|----------------|---------------|--------------|-------------------------------|---------------|---------------|
| Csi-miR164              | 423.51         | 246.32        | 1651.18      | TGGAGAAGCAGGGCACGTGCA         | miR164        | Fruit         |
| <b>Csi-miR166a.1</b>    | <b>0.79</b>    | <b>0</b>      | <b>0</b>     | <b>TCGGACCAGGCTTCATTCCCC</b>  | <b>miR166</b> | <b>Leaf</b>   |
| Csi-miR166a.2           | 6211.15        | 1848.08       | 101.38       | TCGGACCAGGCTTCATTCCCC         | miR166        | Leaf          |
| Csi-miR166b             | 1250.09        | 355.05        | 1.68         | TCGGACCAGGCTTCATTCCCG         | miR166        | Leaf          |
| Csi-miR166c.1           | 1468.68        | 376.01        | 2.24         | TCGGACCAGGCTTCATTCC           | miR166        | Leaf          |
| <b>Csi-miR166c.2</b>    | <b>1542.89</b> | <b>289.87</b> | <b>0</b>     | <b>TCGGACCAGGCTTCATTC</b>     | <b>miR166</b> | <b>Leaf</b>   |
| <b>Csi-miR166c.3</b>    | <b>589.52</b>  | <b>191.74</b> | <b>0</b>     | <b>TCGGACCAGGCTTCATTCCC</b>   | <b>miR166</b> | <b>Leaf</b>   |
| <b>Csi-miR166c.4</b>    | <b>20.05</b>   | <b>6.92</b>   | <b>0</b>     | <b>CTCGGACCAGGCTTCATTCCC</b>  | <b>miR166</b> | <b>Leaf</b>   |
| <b>Csi-miR166c.5</b>    | <b>24.37</b>   | <b>17.83</b>  | <b>9.52</b>  | <b>CTCGGACCAGGCTTCATTCC</b>   | <b>miR166</b> |               |
| <b>Csi-miR166d.1</b>    | <b>17.49</b>   | <b>7.24</b>   | <b>0</b>     | <b>TCGGACCAGGCTTCATTCCCTT</b> | <b>miR166</b> | <b>Leaf</b>   |
| Csi-miR166d.2           | 5560.5         | 1229.96       | 2.24         | TCGGACCAGGCTTCATTCCCT         | miR166        | Leaf          |
| Csi-miR166g.1           | 5454.16        | 3336.79       | 1349.28      | TCTCGGACCAGGCTTCATTCC         | miR166        |               |
| Csi-miR166i             | 67.23          | 89.28         | 2.8          | TTCGGACCAGGCTTCATTCCC         | miR166        |               |
| Csi-miR166j.1           | 581.56         | 431.35        | 0            | TTGGACCAGGCTTCATTCCCTC        | miR166        |               |
| <b>Csi-miR166j.2</b>    | <b>3.44</b>    | <b>2.81</b>   | <b>1.12</b>  | <b>TCTTGGACCAGGCTTCATTCC</b>  | <b>miR166</b> |               |
| <b>Csi-miR166j.3</b>    | <b>863.44</b>  | <b>600.5</b>  | <b>0</b>     | <b>TTGGACCAGGCTTCATTCCAC</b>  | <b>miR166</b> |               |
| Csi-miR167a.1           | 279.23         | 453.62        | 520.33       | TGAAGCTGCCAGCATGATCTA         | miR167        |               |
| <b>Csi-miR167b.1</b>    | <b>119.91</b>  | <b>249.45</b> | <b>5.04</b>  | <b>TGAAGCTGCCAGCATGATCT</b>   | <b>miR167</b> | <b>Flower</b> |
| Csi-miR167b.2           | 132.88         | 8029.68       | 55.45        | TGAAGCTGCCAGCATGATCTTA        | miR167        | Fruit         |
| <b>Csi-miR167b.3</b>    | <b>0</b>       | <b>14.27</b>  | <b>0</b>     | <b>AAGCTGCCAGCATGATCTTA</b>   | <b>miR167</b> | <b>Fruit</b>  |
| <b>Csi-miR167b.4</b>    | <b>9.14</b>    | <b>84.52</b>  | <b>6.72</b>  | <b>TGAAGCTGCCAGCATGATCTT</b>  | <b>miR167</b> | <b>Fruit</b>  |
| Csi-miR167d.1           | 14326.29       | 14164.04      | 938.17       | TGAAGCTGCCAGCATGATCTGA        | miR167        |               |
| <b>Csi-miR167d.2</b>    | <b>111.36</b>  | <b>73.5</b>   | <b>34.73</b> | <b>TGAAGCTGCCAGCATGATCTG</b>  | <b>miR167</b> |               |
| Csi-miR168a             | 1151.61        | 962.36        | 7139.6       | TCGCTTGGTGCAGGTCGGGAA         | miR168        | Fruit         |
| Csi-miR169b.1           | 2.06           | 4.76          | 0            | TAGCCAAGGATGACTTGCCTG         | miR169        | Flower        |
| <b>Csi-miR169b.1-3p</b> | <b>6.98</b>    | <b>2.38</b>   | <b>0</b>     | <b>AGGCAGTCTCCTTGGCTAAG</b>   | <b>miR169</b> | <b>Leaf</b>   |
| Csi-miR169i.1           | 3.54           | 6.38          | 0            | TAGCCAAGGATGACTTGCCTGA        | miR169        |               |
| <b>Csi-miR169i.1-3p</b> | <b>0</b>       | <b>1.62</b>   | <b>0</b>     | <b>GGCAGTCTCCTTGGCTAAC</b>    | <b>miR169</b> | <b>Flower</b> |
| Csi-miR169m.1           | 45.8           | 62.58         | 0            | CAGCCAAGGATGACTTGCCGG         | miR169        |               |

|                         |              |              |              |                               |                |               |
|-------------------------|--------------|--------------|--------------|-------------------------------|----------------|---------------|
| <b>Csi-miR169m.2</b>    | <b>0.69</b>  | <b>0.86</b>  | <b>0</b>     | <b>AGCCAAGGATGACTTGCCGGC</b>  | <b>miR169</b>  |               |
| <b>Csi-miR169m.3</b>    | <b>0</b>     | <b>0.43</b>  | <b>0</b>     | <b>GCAGCCAAGGATGACTTGCCG</b>  | <b>miR169</b>  | <b>Flower</b> |
| Csi-miR171a.1           | 113.03       | 4.86         | 7.84         | TGTTGGAACGGCTCAATCAAA         | miR171         | Leaf          |
| Csi-miR171b             | 175.44       | 27.45        | 20.72        | CGAGCCGAATCAATATCACTC         | miR171         | Leaf          |
| Csi-miR171d             | 16.02        | 4.32         | 1.68         | TTGAGCCGCGTCAATATCTCC         | miR171         | Leaf          |
| Csi-miR171g.1           | 71.65        | 55.55        | 0            | TGATTGAGCCGTGCCAATATC         | miR171         |               |
| <b>Csi-miR172a-3p.1</b> | <b>61.82</b> | <b>11.02</b> | <b>25.76</b> | <b>AGAATCTTGATGATGCTGCA</b>   | <b>miR172</b>  | <b>Leaf</b>   |
| Csi-miR172a-3p.2        | 1237.32      | 778.73       | 151.79       | AGAATCTTGATGATGCTGCAA         | miR172         |               |
| <b>Csi-miR172a-3p.3</b> | <b>28.21</b> | <b>29.07</b> | <b>0</b>     | <b>GAATCTTGATGATGCTGCAA</b>   | <b>miR172</b>  |               |
| Csi-miR172c.1           | 0.49         | 27.45        | 0            | TGGAATCTTGATGATGCT            | miR172         | Flower        |
| <b>Csi-miR172c.2</b>    | <b>1.57</b>  | <b>60.74</b> | <b>7.84</b>  | <b>TGGAATCTTGATGATGCTGCAG</b> | <b>miR172</b>  | <b>Flower</b> |
| Csi-miR172d             | 6368.41      | 879.13       | 4072.49      | AGAATCTTGATGATGCTGCAT         | miR172         |               |
| <b>Csi-miR172d-3p</b>   | <b>0.69</b>  | <b>0.54</b>  | <b>2.24</b>  | <b>GCAGCATCATCAAGATTCACA</b>  | <b>miR172</b>  | <b>Fruit</b>  |
| Csi-miR172e.2           | 247.29       | 45.72        | 30.25        | GAATCTTGATGATGCTGCAT          | miR172         | Leaf          |
| Csi-miR172k             | 13.56        | 0.76         | 11.2         | TGAATCTTGATGATGCTGCAT         | miR172         | Leaf          |
| Csi-miR2111             | 0.79         | 1.41         | 1.68         | TAATCTGCATCCTGAGGTTTG         | miR2111        |               |
| Csi-miR2118.1           | 15.53        | 7.24         | 19.04        | TTACCTATGCCACCCATTCTT         | miR2118        |               |
| <b>Csi-miR2118.2</b>    | <b>2.26</b>  | <b>1.84</b>  | <b>2.24</b>  | <b>TTACCTATGCCACCCATTCC</b>   | <b>miR2118</b> |               |
| Csi-miR2275a            | 0            | 2.27         | 0            | TTTAATTCCTCCAATATCTTA         | miR2275        | Flower        |
| Csi-miR2275b            | 0            | 5.62         | 0            | TTTAATTCCTCCAATATTCA          | miR2275        | Flower        |
| Csi-miR2275c.1          | 0            | 11.56        | 0            | TTTAATTCCTCCAATATTTTA         | miR2275        | Flower        |
| Csi-miR2275d            | 0.2          | 5.94         | 0            | AGAATTGGATGGAATAAACA          | miR2275        | Flower        |
| <b>Csi-miR2275d-3p</b>  | <b>0.88</b>  | <b>10.48</b> | <b>0</b>     | <b>TTTAGTTTCCTCCAATATCTTA</b> | <b>miR2275</b> | <b>Flower</b> |
| Csi-miR2275e            | 0            | 2.16         | 0            | TTTAGTTTCCTCTAATATCTTA        | miR2275        | Flower        |
| Csi-miR2275f            | 0            | 1.3          | 0            | TTTGGTTTTCTCCAATATCTCA        | miR2275        | Flower        |
| Csi-miR2911             | 0            | 0            | 34.17        | CCCGGCCGGGGACGGACTGGGA        | miR2911        | Fruit         |
| Csi-miR319              | 0            | 0            | 3.36         | TTTGGACTGAAGGGAGCTCCT         | miR319         | Fruit         |
| Csi-miR319a             | 4.32         | 4.97         | 1.68         | AGCTGCCGACTATTCAATCA          | miR319         |               |
| Csi-miR319b             | 0.79         | 0            | 0            | TTGGACTGAAGGGAGCTCCC          | miR319         | Leaf          |

|                         |                |              |               |                               |                 |               |
|-------------------------|----------------|--------------|---------------|-------------------------------|-----------------|---------------|
| Csi-miR390.1            | 200.5          | 109.38       | 58.81         | AAGCTCAGGAGGGATAGCGCC         | miR390          |               |
| Csi-miR390.2            | 14.05          | 6.81         | 660.36        | AGCTCAGGAGGGATAGCGCC          | miR390          | Fruit         |
| Csi-miR390-3p.1         | 5.31           | 4.11         | 7.84          | CGCTATCCATCCTGAGTTTCA         | miR390          |               |
| <b>Csi-miR390-3p.2</b>  | <b>1.47</b>    | <b>0</b>     | <b>8.96</b>   | <b>CGCTATCCATCCTGAGTTTC</b>   | <b>miR390</b>   | <b>Fruit</b>  |
| Csi-miR390b             | 80             | 49.5         | 5.6           | CAGCTCAGGAGGGATAGACAA         | miR390          |               |
| Csi-miR391a.1           | 2.06           | 0            | 0             | TTGTCGCCGGAGAGATAGCA          | miR391          | Leaf          |
| <b>Csi-miR391a.2</b>    | <b>2.95</b>    | <b>0.43</b>  | <b>0</b>      | <b>TTGTCGCCGGAGAGATAGCAC</b>  | <b>miR391</b>   | <b>Leaf</b>   |
| <b>Csi-miR391a.3</b>    | <b>2.36</b>    | <b>0.65</b>  | <b>0</b>      | <b>TTGTCGCCGGAGAGATAGCACC</b> | <b>miR391</b>   | <b>Leaf</b>   |
| Csi-miR391b             | 15.73          | 6.48         | 0             | TTGTCGCAGGAGCGTTGGCACC        | miR391          | Leaf          |
| Csi-miR393a.1           | 1.67           | 1.51         | 0             | TCCAAAGGGATCGCATTGAT          | miR393          |               |
| <b>Csi-miR393a.2</b>    | <b>1.38</b>    | <b>2.59</b>  | <b>1.68</b>   | <b>TCCAAAGGGATCGCATTGATC</b>  | <b>miR393</b>   |               |
| <b>Csi-miR393a.2-3p</b> | <b>1.38</b>    | <b>2.59</b>  | <b>1.68</b>   | <b>ATCATGCTATCCCTTTGGATT</b>  | <b>miR393</b>   |               |
| <b>Csi-miR393a.3</b>    | <b>0</b>       | <b>0.97</b>  | <b>0</b>      | <b>TCCAAAGGGATCGCATTGATCC</b> | <b>miR393</b>   | <b>Flower</b> |
| Csi-miR393b             | 10.22          | 73.93        | 3.92          | TTCCAAAGGGATCGCATTGATC        | miR393          | Flower        |
| <b>Csi-miR393b-3p</b>   | <b>27.62</b>   | <b>20.97</b> | <b>1.68</b>   | <b>TCATGCGATCCCTTCGGAATT</b>  | <b>miR393</b>   |               |
| Csi-miR394              | 23.49          | 37.94        | 10.64         | TTGGCATTCTGTCCACCTCC          | miR394          |               |
| <b>Csi-miR394-3p.1</b>  | <b>27.72</b>   | <b>2.49</b>  | <b>43.13</b>  | <b>AGCTGGACAAATTGCAAACATA</b> | <b>miR394</b>   |               |
| <b>Csi-miR394-3p.2</b>  | <b>27.91</b>   | <b>2.27</b>  | <b>7.28</b>   | <b>CTGGACAAATTGCAAACATA</b>   | <b>miR394</b>   | <b>Leaf</b>   |
| <b>Csi-miR394-3p.3</b>  | <b>16.71</b>   | <b>2.59</b>  | <b>2.8</b>    | <b>GCTGGACAAATTGCAAACATA</b>  | <b>miR394</b>   | <b>Leaf</b>   |
| Csi-miR395.1            | 30.17          | 0            | 8.4           | CTGAAGTGTTTGGGGGAACTC         | miR395          | Leaf          |
| <b>Csi-miR395.2</b>     | <b>5.31</b>    | <b>0</b>     | <b>5.6</b>    | <b>TGAAGTGTTTGGGGGAACTC</b>   | <b>miR395</b>   |               |
| Csi-miR395.1            | 291.22         | 312.25       | 210.6         | TAGATAAAGATGAGAGAAAAA         | miR395.1        |               |
| <b>Csi-miR395.1-3p</b>  | <b>1445.39</b> | <b>46.58</b> | <b>309.18</b> | <b>TTTCTCTTATCGTTATCTGT</b>   | <b>miR395.1</b> | <b>Leaf</b>   |
| Csi-miR3952.1           | 245.91         | 71.55        | 20.72         | TGCTGTAGAAAGGCCCTCAA          | miR3952         | Leaf          |
| <b>Csi-miR3952.2</b>    | <b>176.13</b>  | <b>37.94</b> | <b>94.1</b>   | <b>GCTGTAGAAAGGCCCTCAAC</b>   | <b>miR3952</b>  | <b>Leaf</b>   |
| <b>Csi-miR3952-3p</b>   | <b>379.87</b>  | <b>86.46</b> | <b>325.42</b> | <b>TGAAGGGCCTTTCTAGAGCAC</b>  | <b>miR3952</b>  |               |
| Csi-miR3954a            | 13410.18       | 41460.6      | 19926.12      | TTGGACAGAGAAATCACGGTCA        | miR3954         | Flower        |
| Csi-miR3954b            | 150.08         | 478.15       | 57.13         | GGACAGAGAAATCACGGTCA          | miR3954         | Flower        |
| Csi-miR396a             | 161.88         | 169.9        | 24.08         | TTCCACAGCTTTCTTGAAGTGA        | miR396          |               |

|                         |               |               |              |                              |                |               |
|-------------------------|---------------|---------------|--------------|------------------------------|----------------|---------------|
| Csi-miR396b.1           | 0             | 44.64         | 0            | TTCCACAGCTTTCTTGAAC          | miR396         | Flower        |
| <b>Csi-miR396b.2</b>    | <b>170.23</b> | <b>310.84</b> | <b>3.36</b>  | <b>TTCCACAGCTTTCTTGAA</b>    | <b>miR396</b>  |               |
| <b>Csi-miR396b.3</b>    | <b>0</b>      | <b>39.88</b>  | <b>0</b>     | <b>TTCCACAGCTTTCTTGAACCT</b> | <b>miR396</b>  | <b>Flower</b> |
| <b>Csi-miR396b-3p.1</b> | <b>142.32</b> | <b>36.96</b>  | <b>0</b>     | <b>GCTCAAGAAAGCTGTGGGAGA</b> | <b>miR396</b>  | <b>Leaf</b>   |
| <b>Csi-miR396b-3p.2</b> | <b>59.17</b>  | <b>14.59</b>  | <b>3.36</b>  | <b>CTCAAGAAAGCTGTGGGAGA</b>  | <b>miR396</b>  | <b>Leaf</b>   |
| Csi-miR396c             | 123.64        | 7.13          | 7.84         | TTCAAGAAATCTGTGGGAAG         | miR396         | Leaf          |
| Csi-miR396d.1           | 0.88          | 0             | 0            | TTTCCACGGCTTTCTTGAAC         | miR396         | Leaf          |
| <b>Csi-miR396d.2</b>    | <b>0</b>      | <b>0.97</b>   | <b>0</b>     | <b>TTCCACGGCTTTCTTGAACCT</b> | <b>miR396</b>  | <b>Flower</b> |
| <b>Csi-miR396d.3</b>    | <b>0</b>      | <b>1.73</b>   | <b>0</b>     | <b>TTCCACGGCTTTCTTGAAC</b>   | <b>miR396</b>  | <b>Flower</b> |
| <b>Csi-miR396d.4</b>    | <b>318.05</b> | <b>35.67</b>  | <b>1.12</b>  | <b>TTCCACGGCTTTCTTGAA</b>    | <b>miR396</b>  | <b>Leaf</b>   |
| <b>Csi-miR396d-3p</b>   | <b>11.7</b>   | <b>2.05</b>   | <b>1.12</b>  | <b>GCTCAAGAATGCCGTGGGAAA</b> | <b>miR396</b>  | <b>Leaf</b>   |
| Csi-miR397.1            | 22.7          | 169.58        | 0            | TCATTGAGTGCAGCGTTGATG        | miR397         | Flower        |
| <b>Csi-miR397.2</b>     | <b>2.26</b>   | <b>23.13</b>  | <b>0</b>     | <b>CATTGAGTGCAGCGTTGATGA</b> | <b>miR397</b>  | <b>Flower</b> |
| Csi-miR398b             | 27.81         | 11.89         | 0            | TGTGTTCTCAGGTCGCCCTG         | miR398         | Leaf          |
| Csi-miR399a             | 12.48         | 3.57          | 64.97        | TGCCAAAGGAGATTTGCCCGG        | miR399         | Fruit         |
| Csi-miR399b             | 15.53         | 11.24         | 43.13        | TGCCAAAGGAGAGTTGCCCTA        | miR399         | Fruit         |
| Csi-miR399c             | 3.15          | 0.65          | 29.69        | CGCCAAAGGAGAATTGCCCTG        | miR399         | Fruit         |
| Csi-miR399d             | 1.57          | 0.65          | 5.6          | TGCCAAAGGAGAGTTGCCCTG        | miR399         | Fruit         |
| Csi-miR399e             | 0             | 0             | 1.68         | TGCCAAAGGAGAATTGCCCTG        | miR399         | Fruit         |
| Csi-miR399e-5p          | 1.08          | 0.22          | 25.76        | GTGCAGTCCTCCTTTGGCGTG        | miR399         | Fruit         |
| Csi-miR403.1            | 819.41        | 373.42        | 5.04         | TTAGATTCACGCACAAACT          | miR403         | Leaf          |
| <b>Csi-miR403.2</b>     | <b>125.31</b> | <b>27.02</b>  | <b>27.44</b> | <b>TTAGATTCACGCACAAACTCG</b> | <b>miR403</b>  | <b>Leaf</b>   |
| <b>Csi-miR403.3</b>     | <b>189.3</b>  | <b>60.96</b>  | <b>2.24</b>  | <b>TTAGATTCACGCACAAAC</b>    | <b>miR403</b>  | <b>Leaf</b>   |
| Csi-miR408.1            | 125.31        | 220.59        | 16.8         | ACGGGGAACAGGCAGAGCATG        | miR408         |               |
| <b>Csi-miR408.2</b>     | <b>62.41</b>  | <b>249.99</b> | <b>14.56</b> | <b>CGGGGAACAGGCAGAGCATGG</b> | <b>miR408</b>  | <b>Flower</b> |
| Csi-miR4369             | 1.77          | 2.59          | 2.24         | AGAACATGTTGATCTGGAAGGCCA     | miR4369        |               |
| Csi-miR4414.1           | 257.31        | 153.58        | 0            | AGCTGCTGACTCGTTGGTTCA        | miR4414        |               |
| <b>Csi-miR4414.2</b>    | <b>101.43</b> | <b>45.29</b>  | <b>0</b>     | <b>AGCTGCTGACTCGTTGGTTC</b>  | <b>miR4414</b> | <b>Leaf</b>   |
| Csi-miR443b.1           | 2.06          | 1.19          | 0            | ATGAAAATTCAATGATTGTGGAA      | miR443         |               |

|                         |                |               |               |                                 |                |              |
|-------------------------|----------------|---------------|---------------|---------------------------------|----------------|--------------|
| <b>Csi-miR443b.2</b>    | <b>2.06</b>    | <b>2.05</b>   | <b>0.56</b>   | <b>ATGAAAATTCAATGATTGTGGAAA</b> | <b>miR443</b>  |              |
| Csi-miR444a.1           | 102.71         | 41.5          | 0.56          | TTTCTTGAGACAAAACATGCA           | miR444         | Leaf         |
| <b>Csi-miR444a.2</b>    | <b>262.23</b>  | <b>61.39</b>  | <b>15.68</b>  | <b>TTTCTTGAGACAAAACATGCATC</b>  | <b>miR444</b>  | <b>Leaf</b>  |
| Csi-miR472              | 1.08           | 0             | 2.8           | TTTTCCCACACCTCCCATCCC           | miR472         | Fruit        |
| Csi-miR473              | 39.81          | 15.56         | 69.45         | ACTCTCCCTCAAGGGCTTCGC           | miR473         | Fruit        |
| <b>Csi-miR473-3p</b>    | <b>5.31</b>    | <b>2.92</b>   | <b>40.89</b>  | <b>GAAGTCCTTGGGGTTGAGTGA</b>    | <b>miR473</b>  | <b>Fruit</b> |
| Csi-miR477a.1           | 77.15          | 97.06         | 208.36        | ACCTCCCTCGAAGGCTTCCAA           | miR477         | Fruit        |
| <b>Csi-miR477a.2</b>    | <b>1.47</b>    | <b>1.3</b>    | <b>1.68</b>   | <b>TCCCTCGAAGGCTTCCAATATA</b>   | <b>miR477</b>  |              |
| <b>Csi-miR477a-3p</b>   | <b>5.41</b>    | <b>10.38</b>  | <b>114.26</b> | <b>GGAAACCCTAGGGGGAGGTCG</b>    | <b>miR477</b>  | <b>Fruit</b> |
| Csi-miR477b.2           | 5.31           | 1.62          | 10.08         | ACTCTCCCTCAAGGGCTTCTC           | miR477         |              |
| Csi-miR477d.1-3p        | 2.85           | 1.95          | 19.04         | TGAGGCCGTTGGGGAGAGTGG           | miR477         | Fruit        |
| Csi-miR477d.2-5p        | 1.28           | 0.65          | 13.44         | ACTCTCCCTCAAGGGCTTCTGA          | miR477         | Fruit        |
| Csi-miR479.1            | 378.89         | 65.06         | 1141.48       | TGTGATATTGGTTCGGCTCATC          | miR479         | Fruit        |
| <b>Csi-miR479.2</b>     | <b>23.2</b>    | <b>3.57</b>   | <b>27.44</b>  | <b>TGTGATATTGGTTCGGCTCA</b>     | <b>miR479</b>  |              |
| <b>Csi-miR482a-3p</b>   | <b>9.63</b>    | <b>1.73</b>   | <b>82.33</b>  | <b>TCTTCCCTATGCCTCCCATTCC</b>   | <b>miR482</b>  | <b>Fruit</b> |
| Csi-miR482a-5p          | 361.99         | 29.18         | 236.36        | AGTGGGAGCGTGGGGTAAGAAG          | miR482         |              |
| Csi-miR482b             | 0.98           | 0             | 10.64         | TCTTGCCACCCCTCCCATTCC           | miR482         | Fruit        |
| Csi-miR482c             | 5.41           | 4.97          | 10.64         | TTCCCTAGTCCCCCTATTCCCTA         | miR482         |              |
| Csi-miR482d             | 4.03           | 0.32          | 6.16          | TCTTCCCTACTCCACCCATGCC          | miR482         |              |
| Csi-miR482d-5p.1        | 915.53         | 157.26        | 438.56        | TGGTATGGGTGAGTAGGGAAG           | miR482         | Leaf         |
| <b>Csi-miR482d-5p.2</b> | <b>1025.81</b> | <b>105.16</b> | <b>54.89</b>  | <b>TATGGGTGAGTAGGGAAGATA</b>    | <b>miR482</b>  | <b>Leaf</b>  |
| Csi-miR5054.1           | 5.5            | 6.05          | 0.56          | CGTCCCCACAGACGGCGCCA            | miR5054        |              |
| <b>Csi-miR5054.2</b>    | <b>3.64</b>    | <b>1.62</b>   | <b>0.56</b>   | <b>GTTCCCCACAGACGGCGCCA</b>     | <b>miR5054</b> | <b>Leaf</b>  |
| Csi-miR5177             | 5.41           | 6.48          | 0             | AAAGGCTGTAAAAAATACACTCAA        | miR5177        |              |
| Csi-miR5179             | 43.93          | 447.35        | 23.52         | TCTTGCTCAAGACCGCGCAAT           | miR5179        | Flower       |
| Csi-miR5225a            | 2.26           | 0.43          | 0             | TCTGTGCGCAGGAGAGATGGTGC         | miR5225        | Leaf         |
| Csi-miR5291a            | 0              | 0.86          | 0             | TTGATGAATGGCTAGGATTTG           | miR5291        | Flower       |
| Csi-miR530a             | 1.87           | 0.76          | 3.92          | TGCATTTGCACCTGCACCTTG           | miR530         | Fruit        |
| Csi-miR530b             | 17.1           | 0.32          | 2.24          | TGCATTTGCACCTGCATCTTG           | miR530         | Leaf         |

|                         |               |               |               |                               |               |              |
|-------------------------|---------------|---------------|---------------|-------------------------------|---------------|--------------|
| Csi-miR535.1            | 674.53        | 31.99         | 0             | TGACAATGAGAGAGAGCACAC         | miR535        | Leaf         |
| <b>Csi-miR535.2</b>     | <b>18.28</b>  | <b>0.65</b>   | <b>0</b>      | <b>TGACAATGAGAGAGAGACA</b>    | <b>miR535</b> | <b>Leaf</b>  |
| <b>Csi-miR536-3p</b>    | <b>6.49</b>   | <b>0</b>      | <b>0</b>      | <b>TGGTGCCACGCTGTGTGCGTC</b>  | <b>miR536</b> | <b>Leaf</b>  |
| Csi-miR536-5p           | 3.73          | 0.32          | 0             | CGCACCCAGCGTGAACCATC          | miR536        | Leaf         |
| Csi-miR814              | 0             | 10.16         | 0             | AAATTAGATTCGTTGTGTGATGAG      | miR814        | Flower       |
| Csi-miR827.1            | 7.96          | 14.16         | 81.21         | TTAGATGACCATCAACAAACA         | miR827        | Fruit        |
| <b>Csi-miR827.2</b>     | <b>1.28</b>   | <b>1.95</b>   | <b>24.08</b>  | <b>TTAGATGACCATCAACAAACAT</b> | <b>miR827</b> | <b>Fruit</b> |
| Csi-miR827-5p.1         | 93.08         | 169.26        | 44.81         | CTTGTTGATTGTCATCTAATC         | miR827        |              |
| <b>Csi-miR827-5p.2</b>  | <b>103.69</b> | <b>229.67</b> | <b>142.27</b> | <b>TGCTTGTTGATTGTCATCTAA</b>  | <b>miR827</b> |              |
| Csi-miR828              | 3.24          | 0.32          | 0             | GATACTCATTTAGGCAAGACG         | miR828        | Leaf         |
| Csi-miR833.1            | 2.26          | 9.73          | 2.24          | ATTTATTGTTGATATGGGTCA         | miR833        | Flower       |
| Csi-miR845a             | 1.87          | 3.67          | 0             | AACAAGTGGTATCAGAGCTAGACC      | miR845        |              |
| Csi-miR896              | 1.38          | 1.62          | 0             | GTCGCTTTGGCCGAGTGGTTAA        | miR896        |              |
| Csi-miRN01 <sup>c</sup> | 0             | 0             | 0             | AACGAGTCACTTTTCTGTAA          |               |              |
| Csi-miRN02              | 0             | 0             | 17.36         | AACTGTAGTACCGTGCCACAG         |               | Fruit        |
| Csi-miRN03              | 85.02         | 17.4          | 0             | TGTTTTGGGTGAAACGGGTGTT        |               | Leaf         |
| Csi-miRN04              | 0             | 22.91         | 11.2          | TTGTAGAGTGTGTATGTTACA         |               | Flower       |
| Csi-miRN05              | 0             | 0.54          | 0             | ATGTAAGATACATTTCTCTCA         |               | Flower       |
| Csi-miRN06              | 43.93         | 19.13         | 25.76         | CATGTTTCGGGTTTGTGCGTG         |               |              |
| Csi-miRN07              | 0             | 0             | 64.41         | GGAAGACAAGATCAAACGGTG         |               | Fruit        |
| Csi-miRN08              | 0             | 19.45         | 0             | CCCGGGTCACAGCTCCCTGGAC        |               | Flower       |
| Csi-miRN09 <sup>c</sup> | 0             | 0             | 0             | ATGAAGGAATGCTACCCCAGG         |               |              |
| Csi-miRN10              | 1.87          | 0.54          | 0             | TTATTGAGTGTGTATGTTACA         |               | Leaf         |
| Csi-miRN11              | 2121.89       | 1274.17       | 3892.14       | TCGCAGGAGCTTTCTACGGTT         |               |              |
| Csi-miRN12              | 0             | 43.88         | 0             | TCAATGGTTATGGCACTAAGA         |               | Flower       |
| Csi-miRN13 <sup>c</sup> | 0             | 0             | 0             | ATCCTTATTGTCGGGGCTACGCAA      |               |              |
| Csi-miRN14 <sup>c</sup> | 0             | 0             | 0             | GCATAGTCTTGATAATAAGAATTC      |               |              |
| Csi-miRN15              | 55.04         | 15.13         | 0             | TCGCAGGGGAGATGGGACCAAC        |               | Leaf         |
| Csi-miRN16              | 229.01        | 17.51         | 3.36          | CTGATGAGAGAGCGAATGATA         |               | Leaf         |

|            |         |         |         |                           |        |
|------------|---------|---------|---------|---------------------------|--------|
| Csi-miRN17 | 0       | 1.08    | 0       | TTGTGGAGTGTGTATGTTACA     | Flower |
| Csi-miRN18 | 1.08    | 0       | 0       | GCTGGATGCAACTGTGGTACG     | Leaf   |
| Csi-miRN19 | 0.88    | 0       | 0       | TTCGTTCGTTGAAACTCTAAA     | Leaf   |
| Csi-miRN20 | 79.71   | 121.7   | 54.89   | TTTTGTTGCATGATGCTGATAA    |        |
| Csi-miRN21 | 0.49    | 2.27    | 0       | TAATTGTAATTACACTGTCTGATA  | Flower |
| Csi-miRN22 | 7.27    | 4.76    | 0       | AAATATAGGACAAAAATAACATA   |        |
| Csi-miRN23 | 14.45   | 13.51   | 20.72   | CTTTCAGCAGCCTCCGGCGTC     |        |
| Csi-miRN24 | 2.95    | 33.4    | 2.24    | AGCAAGCATCCTGGGCTAAT      | Flower |
| Csi-miRN25 | 15.53   | 13.94   | 0       | AGGGATTTTCATGAAACATGGCATT |        |
| Csi-miRN26 | 848.2   | 8.32    | 23.52   | ACAGGAGGTGGAACAAATATGAAA  | Leaf   |
| Csi-miRN27 | 0.79    | 0.32    | 15.12   | TATGTTGCAACAGTGGTACGGTA   | Fruit  |
| Csi-miRN28 | 7.86    | 2.49    | 2.8     | CATGGGGAGTAGCTGCGCGGT     | Leaf   |
| Csi-miRN29 | 2.75    | 3.89    | 1.12    | CGATATGGGATTTTGGGTAAAAAC  |        |
| Csi-miRN30 | 1.18    | 0.43    | 0       | AGTATATAACGGGAGTACTCAAGA  | Leaf   |
| Csi-miRN31 | 24.96   | 85.6    | 435.76  | CCGTTGAGGTAGGGCAGTTCGG    | Fruit  |
| Csi-miRN32 | 139.86  | 129.59  | 15.12   | ATCTATTTGGATGAAGATAAGGGC  |        |
| Csi-miRN33 | 37.25   | 59.01   | 6.72    | AGGGACAAGCTAAAAGACCAA     |        |
| Csi-miRN34 | 98.58   | 44.64   | 21.84   | ATTCGGGACGAGTTTACAACGTTG  | Leaf   |
| Csi-miRN35 | 2.95    | 2.92    | 3.36    | GTTTAGGACAGCTGCTGCCAAA    |        |
| Csi-miRN36 | 4757.41 | 1220.13 | 4312.77 | GGTCATGGGAGGATTGGCGAAA    |        |
| Csi-miRN37 | 101.04  | 37.4    | 11.76   | TGAGGGAAGAGCTTAGAAGG      | Leaf   |
| Csi-miRN38 | 2.26    | 2.27    | 1.12    | ATGGTCGTATGATAACGTGATTGG  |        |

miRNA isoforms and miRNA\* species with high expression levels are indicated using bold text.

<sup>a</sup> The miRNA counts were normalized to the number of transcripts per million.

<sup>b</sup> The csi-miR1092.1 isoform was removed because its abundance was very low.

<sup>c</sup> These four novel miRNAs were not identified in our sequencing data; however, they were identified in other *C. sinensis* sequencing data (data not shown).
