# Supplementary material for: Genome-wide comparison of microRNAs and their targeted transcripts among leaf, flower and fruit of sweet orange
Source: PubMed Central journal article supplement (PMC4158063; doi:10.1186/1471-2164-15-695), 2014-08-20
Supplement: 12864_2014_6413_MOESM3_ESM.pdf [file 12864_2014_6413_MOESM3_ESM.pdf]

**Additional file 3: Targets of miRNAs identified using degradome sequencing in sweet orange.****a. Targets of miRNAs identified in leaf using degradome sequencing**

| miRNA          | Target          | Category |
|----------------|-----------------|----------|
| Csi-miR1092.2  | —               | —        |
| Csi-miR1432a   | —               | —        |
| Csi-miR1446    | —               | —        |
| Csi-miR1507a.2 | —               | —        |
| Csi-miR1515    | —               | —        |
| Csi-miR156a.1  | Cs2g05730       | 1        |
| Csi-miR156a.1  | Cs2g23550       | 1        |
| Csi-miR156a.1  | Cs7g10830       | 1        |
| Csi-miR156a.1  | orange1.1t02265 | 1        |
| Csi-miR156a.1  | Cs5g11880       | 3        |
| Csi-miR156a.1  | Cs8g17370       | 3        |
| Csi-miR156a.2  | Cs2g05730       | 1        |
| Csi-miR156a.2  | Cs2g23550       | 1        |
| Csi-miR156a.2  | Cs7g10830       | 1        |
| Csi-miR156a.2  | orange1.1t02265 | 1        |
| Csi-miR156a.2  | Cs8g17370       | 3        |
| Csi-miR156b.1  | Cs2g05730       | 1        |
| Csi-miR156b.1  | Cs2g23550       | 1        |
| Csi-miR156b.1  | Cs7g10830       | 1        |
| Csi-miR156b.1  | orange1.1t02265 | 1        |
| Csi-miR156c.1  | Cs2g05730       | 1        |
| Csi-miR156c.1  | Cs2g23550       | 1        |
| Csi-miR156c.1  | Cs7g10830       | 1        |
| Csi-miR156c.1  | orange1.1t02265 | 1        |
| Csi-miR156d    | Cs2g05730       | 1        |
| Csi-miR156d    | Cs2g23550       | 1        |
| Csi-miR156d    | Cs7g10830       | 1        |
| Csi-miR156d    | orange1.1t02265 | 1        |
| Csi-miR156e    | Cs2g05730       | 1        |
| Csi-miR156e    | Cs2g23550       | 1        |
| Csi-miR156e    | Cs7g10830       | 1        |
| Csi-miR156e    | orange1.1t02265 | 1        |
| Csi-miR156f.2  | Cs2g05730       | 1        |
| Csi-miR156f.2  | Cs2g23550       | 1        |
| Csi-miR156f.2  | Cs7g10830       | 1        |
| Csi-miR156f.2  | orange1.1t02265 | 1        |
| Csi-miR156f.2  | Cs8g19900       | 2        |
| Csi-miR156g.1  | Cs2g05730       | 1        |
| Csi-miR156g.1  | Cs2g23550       | 1        |
| Csi-miR156g.1  | Cs7g10830       | 1        |
| Csi-miR156g.1  | orange1.1t02265 | 1        |
| Csi-miR156g.2  | Cs2g05730       | 1        |

|                 |                 |   |
|-----------------|-----------------|---|
| Csi-miR156g.2   | Cs2g23550       | 1 |
| Csi-miR156g.2   | Cs7g10830       | 1 |
| Csi-miR156g.2   | orange1.1t02265 | 1 |
| Csi-miR156h     | Cs2g05730       | 1 |
| Csi-miR156h     | Cs2g23550       | 1 |
| Csi-miR156h     | Cs7g10830       | 1 |
| Csi-miR156h     | orange1.1t02265 | 1 |
| Csi-miR159      | Cs6g10950       | 1 |
| Csi-miR159      | Cs3g06390       | 2 |
| Csi-miR159b     | Cs3g06390       | 2 |
| Csi-miR160a-3p  | —               | — |
| Csi-miR160a-5p  | Cs3g18940       | 1 |
| Csi-miR160a-5p  | Cs6g11800       | 1 |
| Csi-miR160a-5p  | Cs7g25670       | 1 |
| Csi-miR160a-5p  | Cs8g16440       | 1 |
| Csi-miR160b-3p  | —               | — |
| Csi-miR160b-5p  | Cs3g18940       | 1 |
| Csi-miR160b-5p  | Cs6g11800       | 1 |
| Csi-miR160b-5p  | Cs7g25670       | 1 |
| Csi-miR160b-5p  | Cs8g16440       | 1 |
| Csi-miR160c.1   | —               | — |
| Csi-miR160c.2   | —               | — |
| Csi-miR162-3p.1 | —               | — |
| Csi-miR162-3p.2 | —               | — |
| Csi-miR164      | Cs5g10870       | 1 |
| Csi-miR164      | Cs7g01530       | 3 |
| Csi-miR166a.1   | Cs2g09770       | 1 |
| Csi-miR166a.1   | Cs4g19310       | 1 |
| Csi-miR166a.1   | Cs8g16510       | 1 |
| Csi-miR166a.1   | Cs1g15640       | 3 |
| Csi-miR166a.2   | Cs2g09770       | 1 |
| Csi-miR166a.2   | Cs4g19310       | 1 |
| Csi-miR166a.2   | Cs8g16510       | 1 |
| Csi-miR166a.2   | Cs1g15640       | 3 |
| Csi-miR166b     | Cs2g09770       | 1 |
| Csi-miR166b     | Cs4g19310       | 1 |
| Csi-miR166b     | Cs8g16510       | 1 |
| Csi-miR166b     | Cs1g15640       | 3 |
| Csi-miR166c.1   | Cs2g09770       | 1 |
| Csi-miR166c.1   | Cs4g19310       | 1 |
| Csi-miR166c.1   | Cs8g16510       | 1 |
| Csi-miR166c.1   | Cs1g15640       | 3 |
| Csi-miR166c.2   | Cs2g09770       | 1 |
| Csi-miR166c.2   | Cs4g19310       | 1 |
| Csi-miR166c.2   | Cs8g16510       | 1 |

|               |           |   |
|---------------|-----------|---|
| Csi-miR166c.2 | Cs1g15640 | 3 |
| Csi-miR166c.2 | Cs4g06030 | 3 |
| Csi-miR166c.3 | Cs2g09770 | 1 |
| Csi-miR166c.3 | Cs4g19310 | 1 |
| Csi-miR166c.3 | Cs8g16510 | 1 |
| Csi-miR166c.3 | Cs1g15640 | 3 |
| Csi-miR166c.4 | Cs2g09770 | 1 |
| Csi-miR166c.4 | Cs4g19310 | 1 |
| Csi-miR166c.4 | Cs8g16510 | 1 |
| Csi-miR166c.4 | Cs1g15640 | 3 |
| Csi-miR166c.5 | Cs2g09770 | 1 |
| Csi-miR166c.5 | Cs4g19310 | 1 |
| Csi-miR166c.5 | Cs8g16510 | 1 |
| Csi-miR166c.5 | Cs1g15640 | 3 |
| Csi-miR166d.1 | Cs2g09770 | 1 |
| Csi-miR166d.1 | Cs4g19310 | 1 |
| Csi-miR166d.1 | Cs8g16510 | 1 |
| Csi-miR166d.1 | Cs1g15640 | 3 |
| Csi-miR166d.2 | Cs2g09770 | 1 |
| Csi-miR166d.2 | Cs4g19310 | 1 |
| Csi-miR166d.2 | Cs8g16510 | 1 |
| Csi-miR166d.2 | Cs1g15640 | 3 |
| Csi-miR166g.1 | Cs2g09770 | 1 |
| Csi-miR166g.1 | Cs4g19310 | 1 |
| Csi-miR166g.1 | Cs8g16510 | 1 |
| Csi-miR166g.1 | Cs1g15640 | 3 |
| Csi-miR166i   | Cs2g09770 | 1 |
| Csi-miR166i   | Cs4g19310 | 1 |
| Csi-miR166i   | Cs8g16510 | 1 |
| Csi-miR166i   | Cs1g15640 | 3 |
| Csi-miR166j.1 | Cs2g09770 | 1 |
| Csi-miR166j.1 | Cs4g19310 | 1 |
| Csi-miR166j.1 | Cs8g16510 | 1 |
| Csi-miR166j.1 | Cs1g15640 | 3 |
| Csi-miR166j.2 | Cs1g15640 | 3 |
| Csi-miR166j.3 | Cs2g09770 | 1 |
| Csi-miR166j.3 | Cs4g19310 | 1 |
| Csi-miR166j.3 | Cs8g16510 | 1 |
| Csi-miR166j.3 | Cs1g15640 | 3 |
| Csi-miR167a.1 | Cs2g15130 | 1 |
| Csi-miR167a.1 | Cs6g16030 | 2 |
| Csi-miR167a.1 | Cs2g09440 | 3 |
| Csi-miR167b.1 | Cs2g15130 | 1 |
| Csi-miR167b.1 | Cs1g09030 | 2 |
| Csi-miR167b.1 | Cs2g09440 | 2 |

|                  |                 |   |
|------------------|-----------------|---|
| Csi-miR167b.1    | Cs6g16030       | 2 |
| Csi-miR167b.2    | Cs1g09030       | 2 |
| Csi-miR167b.2    | Cs6g16030       | 2 |
| Csi-miR167b.2    | Cs2g09440       | 3 |
| Csi-miR167b.3    | Cs2g15130       | 1 |
| Csi-miR167b.3    | Cs6g16030       | 2 |
| Csi-miR167b.3    | Cs2g09440       | 3 |
| Csi-miR167b.4    | Cs2g15130       | 1 |
| Csi-miR167b.4    | Cs1g09030       | 2 |
| Csi-miR167b.4    | Cs6g16030       | 2 |
| Csi-miR167b.4    | Cs2g09440       | 3 |
| Csi-miR167d.1    | Cs6g16030       | 2 |
| Csi-miR167d.1    | Cs2g09440       | 3 |
| Csi-miR167d.2    | Cs2g15130       | 1 |
| Csi-miR167d.2    | Cs6g16030       | 2 |
| Csi-miR167d.2    | Cs2g09440       | 3 |
| Csi-miR168a      | orange1.1t00591 | 1 |
| Csi-miR168a      | Cs5g16710       | 3 |
| Csi-miR169b.1    | Cs1g17780       | 1 |
| Csi-miR169b.1    | Cs2g30350       | 1 |
| Csi-miR169b.1    | Cs6g13560       | 1 |
| Csi-miR169b.1    | Cs7g01720       | 1 |
| Csi-miR169b.1-3p | —               | — |
| Csi-miR169i.1    | Cs1g17780       | 1 |
| Csi-miR169i.1    | Cs2g30350       | 1 |
| Csi-miR169i.1    | Cs6g13560       | 1 |
| Csi-miR169i.1    | Cs7g01720       | 1 |
| Csi-miR169i.1-3p | —               | — |
| Csi-miR169m.1    | Cs1g17780       | 1 |
| Csi-miR169m.1    | Cs2g30350       | 1 |
| Csi-miR169m.1    | Cs6g13560       | 1 |
| Csi-miR169m.1    | Cs7g01720       | 1 |
| Csi-miR169m.2    | Cs1g17780       | 1 |
| Csi-miR169m.2    | Cs2g30350       | 1 |
| Csi-miR169m.2    | Cs7g01720       | 1 |
| Csi-miR169m.3    | Cs1g17780       | 1 |
| Csi-miR169m.3    | Cs2g30350       | 1 |
| Csi-miR171a.1    | —               | — |
| Csi-miR171b      | —               | — |
| Csi-miR171d      | Cs5g08980       | 1 |
| Csi-miR171d      | orange1.1t00199 | 1 |
| Csi-miR171d      | orange1.1t00200 | 1 |
| Csi-miR171g.1    | Cs5g08980       | 1 |
| Csi-miR171g.1    | orange1.1t00199 | 1 |
| Csi-miR171g.1    | orange1.1t00200 | 1 |

|                  |                 |   |
|------------------|-----------------|---|
| Csi-miR172a-3p.1 | Cs7g27790       | 1 |
| Csi-miR172a-3p.1 | Cs8g17390       | 1 |
| Csi-miR172a-3p.1 | orange1.1t04055 | 1 |
| Csi-miR172a-3p.1 | Cs6g11940       | 3 |
| Csi-miR172a-3p.2 | Cs7g27790       | 1 |
| Csi-miR172a-3p.2 | Cs8g17390       | 1 |
| Csi-miR172a-3p.2 | orange1.1t04055 | 1 |
| Csi-miR172a-3p.3 | Cs7g27790       | 1 |
| Csi-miR172a-3p.3 | Cs8g17390       | 1 |
| Csi-miR172a-3p.3 | orange1.1t04055 | 1 |
| Csi-miR172a-3p.3 | Cs2g21180       | 3 |
| Csi-miR172c.1    | Cs3g06140       | 1 |
| Csi-miR172c.1    | Cs7g27790       | 1 |
| Csi-miR172c.1    | Cs8g17390       | 1 |
| Csi-miR172c.1    | orange1.1t04055 | 1 |
| Csi-miR172c.1    | Cs7g23640       | 2 |
| Csi-miR172c.1    | Cs2g21180       | 3 |
| Csi-miR172c.1    | Cs6g11940       | 3 |
| Csi-miR172c.1    | Cs7g31800       | 3 |
| Csi-miR172c.2    | Cs7g27790       | 1 |
| Csi-miR172c.2    | Cs8g17390       | 1 |
| Csi-miR172c.2    | orange1.1t04055 | 1 |
| Csi-miR172c.2    | Cs7g31800       | 3 |
| Csi-miR172d      | Cs7g27790       | 1 |
| Csi-miR172d      | Cs8g17390       | 1 |
| Csi-miR172d      | orange1.1t04055 | 1 |
| Csi-miR172d-3p   | Cs5g21000       | 3 |
| Csi-miR172d-3p   | Cs9g03090       | 3 |
| Csi-miR172e.2    | Cs7g27790       | 1 |
| Csi-miR172e.2    | Cs8g17390       | 1 |
| Csi-miR172e.2    | orange1.1t04055 | 1 |
| Csi-miR172e.2    | Cs9g07740       | 3 |
| Csi-miR172k      | Cs7g27790       | 1 |
| Csi-miR172k      | Cs8g17390       | 1 |
| Csi-miR172k      | orange1.1t04055 | 1 |
| Csi-miR2111      | —               | — |
| Csi-miR2118.1    | orange1.1t00557 | 1 |
| Csi-miR2118.1    | orange1.1t00149 | 2 |
| Csi-miR2118.1    | orange1.1t02171 | 3 |
| Csi-miR2118.1    | orange1.1t02175 | 3 |
| Csi-miR2118.2    | Cs2g09590       | 1 |
| Csi-miR2118.2    | Cs2g30960       | 1 |
| Csi-miR2118.2    | Cs2g30970       | 1 |
| Csi-miR2118.2    | Cs3g12720       | 1 |
| Csi-miR2118.2    | Cs3g12760       | 1 |

|                  |                 |   |
|------------------|-----------------|---|
| Csi-miR2118.2    | Cs3g12850       | 1 |
| Csi-miR2118.2    | Cs5g18480       | 1 |
| Csi-miR2118.2    | Cs5g19310       | 1 |
| Csi-miR2118.2    | Cs5g19850       | 1 |
| Csi-miR2118.2    | Cs5g19920       | 1 |
| Csi-miR2118.2    | orange1.1t00557 | 1 |
| Csi-miR2118.2    | Cs8g10560       | 2 |
| Csi-miR2118.2    | orange1.1t00149 | 2 |
| Csi-miR2118.2    | orange1.1t02171 | 3 |
| Csi-miR2118.2    | orange1.1t02175 | 3 |
| Csi-miR2275a     | —               | — |
| Csi-miR2275b     | —               | — |
| Csi-miR2275c.1   | —               | — |
| Csi-miR2275d     | Cs5g35220       | 1 |
| Csi-miR2275d     | Cs8g03105       | 1 |
| Csi-miR2275d-3p  | —               | — |
| Csi-miR2275e     | —               | — |
| Csi-miR2275f     | —               | — |
| Csi-miR2911      | —               | — |
| Csi-miR319       | Cs3g06390       | 2 |
| Csi-miR319a      | —               | — |
| Csi-miR319b      | Cs3g06390       | 2 |
| Csi-miR390.1     | Cs9g01780       | 2 |
| Csi-miR390.2     | Cs9g01780       | 2 |
| Csi-miR390-3p.1  | —               | — |
| Csi-miR390-3p.2  | —               | — |
| Csi-miR390b      | Cs9g01780       | 2 |
| Csi-miR391a.1    | —               | — |
| Csi-miR391a.2    | —               | — |
| Csi-miR391a.3    | —               | — |
| Csi-miR391b      | —               | — |
| Csi-miR393a.1    | Cs2g14270       | 1 |
| Csi-miR393a.1    | Cs7g31800       | 2 |
| Csi-miR393a.2    | Cs2g14270       | 1 |
| Csi-miR393a.2-3p | —               | — |
| Csi-miR393a.3    | Cs2g14270       | 1 |
| Csi-miR393b      | Cs2g14270       | 1 |
| Csi-miR393b-3p   | —               | — |
| Csi-miR394       | Cs7g10850       | 2 |
| Csi-miR394       | Cs2g02980       | 3 |
| Csi-miR394-3p.1  | —               | — |
| Csi-miR394-3p.2  | —               | — |
| Csi-miR394-3p.3  | —               | — |
| Csi-miR395.1     | —               | — |
| Csi-miR395.2     | Cs5g34330       | 1 |

|                |                 |   |
|----------------|-----------------|---|
| Csi-miR3951    | Cs1g06060       | 1 |
| Csi-miR3951    | orange1.1t05622 | 1 |
| Csi-miR3951-3p | —               | — |
| Csi-miR3952.1  | —               | — |
| Csi-miR3952.2  | —               | — |
| Csi-miR3952-3p | orange1.1t02252 | 2 |
| Csi-miR3954a   | Cs1g09600       | 2 |
| Csi-miR3954a   | Cs7g22460       | 2 |
| Csi-miR3954a   | Cs1g09635       | 3 |
| Csi-miR3954a   | Cs5g04670       | 3 |
| Csi-miR3954b   | Cs2g29120       | 1 |
| Csi-miR3954b   | Cs1g09600       | 2 |
| Csi-miR3954b   | Cs1g09635       | 2 |
| Csi-miR3954b   | Cs7g22460       | 2 |
| Csi-miR3954b   | Cs1g09665       | 3 |
| Csi-miR3954b   | Cs5g04670       | 3 |
| Csi-miR396a    | Cs1g21350       | 1 |
| Csi-miR396a    | Cs1g22520       | 1 |
| Csi-miR396a    | Cs3g23180       | 1 |
| Csi-miR396a    | Cs5g01380       | 1 |
| Csi-miR396a    | Cs7g15220       | 1 |
| Csi-miR396a    | Cs7g27670       | 1 |
| Csi-miR396a    | Cs7g27680       | 1 |
| Csi-miR396a    | orange1.1t00172 | 1 |
| Csi-miR396a    | orange1.1t03122 | 1 |
| Csi-miR396a    | Cs4g05000       | 3 |
| Csi-miR396a    | Cs5g09850       | 3 |
| Csi-miR396b.1  | Cs1g21350       | 1 |
| Csi-miR396b.1  | Cs1g22520       | 1 |
| Csi-miR396b.1  | Cs3g23180       | 1 |
| Csi-miR396b.1  | Cs5g01380       | 1 |
| Csi-miR396b.1  | Cs7g15220       | 1 |
| Csi-miR396b.1  | Cs7g27670       | 1 |
| Csi-miR396b.1  | Cs7g27680       | 1 |
| Csi-miR396b.1  | orange1.1t00172 | 1 |
| Csi-miR396b.1  | orange1.1t02555 | 1 |
| Csi-miR396b.1  | orange1.1t03122 | 1 |
| Csi-miR396b.1  | Cs6g19380       | 2 |
| Csi-miR396b.1  | Cs4g05000       | 3 |
| Csi-miR396b.1  | Cs5g06510       | 3 |
| Csi-miR396b.1  | Cs5g09850       | 3 |
| Csi-miR396b.1  | Cs5g24150       | 3 |
| Csi-miR396b.2  | Cs1g21350       | 1 |
| Csi-miR396b.2  | Cs3g23180       | 1 |
| Csi-miR396b.2  | Cs5g01380       | 1 |

|                  |                 |   |
|------------------|-----------------|---|
| Csi-miR396b.2    | Cs7g15220       | 1 |
| Csi-miR396b.2    | Cs7g27670       | 1 |
| Csi-miR396b.2    | Cs7g27680       | 1 |
| Csi-miR396b.2    | orange1.1t00172 | 1 |
| Csi-miR396b.2    | orange1.1t02555 | 1 |
| Csi-miR396b.2    | orange1.1t03122 | 1 |
| Csi-miR396b.2    | Cs6g19380       | 2 |
| Csi-miR396b.2    | Cs4g05000       | 3 |
| Csi-miR396b.2    | Cs4g06230       | 3 |
| Csi-miR396b.2    | Cs5g05620       | 3 |
| Csi-miR396b.2    | Cs5g06510       | 3 |
| Csi-miR396b.2    | Cs5g09850       | 3 |
| Csi-miR396b.2    | Cs5g24150       | 3 |
| Csi-miR396b.2    | Cs6g19000       | 3 |
| Csi-miR396b.2    | Cs8g03020       | 3 |
| Csi-miR396b.2    | Cs8g17370       | 3 |
| Csi-miR396b.3    | Cs1g21350       | 1 |
| Csi-miR396b.3    | Cs1g22520       | 1 |
| Csi-miR396b.3    | Cs3g23180       | 1 |
| Csi-miR396b.3    | Cs5g01380       | 1 |
| Csi-miR396b.3    | Cs7g15220       | 1 |
| Csi-miR396b.3    | orange1.1t00172 | 1 |
| Csi-miR396b.3    | orange1.1t02555 | 1 |
| Csi-miR396b.3    | orange1.1t03122 | 1 |
| Csi-miR396b.3    | Cs5g09850       | 3 |
| Csi-miR396b-3p.1 | —               | — |
| Csi-miR396b-3p.2 | Cs2g01990       | 3 |
| Csi-miR396c      | —               | — |
| Csi-miR396d.1    | Cs1g21350       | 1 |
| Csi-miR396d.1    | Cs1g22520       | 1 |
| Csi-miR396d.1    | Cs3g23180       | 1 |
| Csi-miR396d.1    | Cs5g01380       | 1 |
| Csi-miR396d.1    | Cs7g15220       | 1 |
| Csi-miR396d.1    | orange1.1t00172 | 1 |
| Csi-miR396d.1    | orange1.1t02555 | 1 |
| Csi-miR396d.1    | orange1.1t03122 | 1 |
| Csi-miR396d.1    | Cs4g12200       | 3 |
| Csi-miR396d.1    | Cs5g09850       | 3 |
| Csi-miR396d.1    | Cs8g17370       | 3 |
| Csi-miR396d.2    | Cs1g21350       | 1 |
| Csi-miR396d.2    | Cs1g22520       | 1 |
| Csi-miR396d.2    | Cs3g23180       | 1 |
| Csi-miR396d.2    | Cs5g01380       | 1 |
| Csi-miR396d.2    | Cs7g15220       | 1 |
| Csi-miR396d.2    | orange1.1t00172 | 1 |



|                |                 |   |
|----------------|-----------------|---|
| Csi-miR396d.2  | orange1.1t02555 | 1 |
| Csi-miR396d.2  | orange1.1t03122 | 1 |
| Csi-miR396d.2  | Cs2g09620       | 3 |
| Csi-miR396d.2  | Cs5g09850       | 3 |
| Csi-miR396d.2  | Cs8g17370       | 3 |
| Csi-miR396d.3  | Cs1g21350       | 1 |
| Csi-miR396d.3  | Cs1g22520       | 1 |
| Csi-miR396d.3  | Cs3g23180       | 1 |
| Csi-miR396d.3  | Cs5g01380       | 1 |
| Csi-miR396d.3  | Cs7g15220       | 1 |
| Csi-miR396d.3  | orange1.1t00172 | 1 |
| Csi-miR396d.3  | orange1.1t02555 | 1 |
| Csi-miR396d.3  | orange1.1t03122 | 1 |
| Csi-miR396d.3  | Cs1g15720       | 3 |
| Csi-miR396d.3  | Cs2g21180       | 3 |
| Csi-miR396d.3  | Cs4g05000       | 3 |
| Csi-miR396d.3  | Cs4g12200       | 3 |
| Csi-miR396d.3  | Cs5g09850       | 3 |
| Csi-miR396d.3  | Cs8g17370       | 3 |
| Csi-miR396d.4  | Cs1g21350       | 1 |
| Csi-miR396d.4  | Cs1g22520       | 1 |
| Csi-miR396d.4  | Cs3g23180       | 1 |
| Csi-miR396d.4  | Cs5g01380       | 1 |
| Csi-miR396d.4  | Cs7g15220       | 1 |
| Csi-miR396d.4  | Cs7g27670       | 1 |
| Csi-miR396d.4  | Cs7g27680       | 1 |
| Csi-miR396d.4  | orange1.1t00172 | 1 |
| Csi-miR396d.4  | orange1.1t02555 | 1 |
| Csi-miR396d.4  | orange1.1t03122 | 1 |
| Csi-miR396d.4  | Cs6g19380       | 2 |
| Csi-miR396d.4  | Cs1g15720       | 3 |
| Csi-miR396d.4  | Cs2g21180       | 3 |
| Csi-miR396d.4  | Cs4g05000       | 3 |
| Csi-miR396d.4  | Cs4g10880       | 3 |
| Csi-miR396d.4  | Cs4g12200       | 3 |
| Csi-miR396d.4  | Cs5g01840       | 3 |
| Csi-miR396d.4  | Cs5g06510       | 3 |
| Csi-miR396d.4  | Cs5g09850       | 3 |
| Csi-miR396d.4  | Cs6g17090       | 3 |
| Csi-miR396d.4  | Cs8g03230       | 3 |
| Csi-miR396d.4  | Cs8g17370       | 3 |
| Csi-miR396d-3p | —               | — |
| Csi-miR397.1   | orange1.1t03059 | 3 |
| Csi-miR397.2   | orange1.1t03059 | 3 |
| Csi-miR398b    | —               | — |

|                  |                 |   |
|------------------|-----------------|---|
| Csi-miR399a      | —               | — |
| Csi-miR399b      | —               | — |
| Csi-miR399c      | —               | — |
| Csi-miR399d      | —               | — |
| Csi-miR399e      | —               | — |
| Csi-miR399e-5p   | —               | — |
| Csi-miR403.1     | Cs2g10760       | 1 |
| Csi-miR403.1     | Cs4g01460       | 1 |
| Csi-miR403.1     | Cs4g19605       | 1 |
| Csi-miR403.1     | Cs3g01650       | 2 |
| Csi-miR403.1     | Cs2g10770       | 3 |
| Csi-miR403.2     | Cs2g10760       | 1 |
| Csi-miR403.2     | Cs2g10770       | 3 |
| Csi-miR403.3     | Cs2g10760       | 1 |
| Csi-miR403.3     | Cs4g01460       | 1 |
| Csi-miR403.3     | Cs4g19605       | 1 |
| Csi-miR403.3     | Cs3g01650       | 2 |
| Csi-miR403.3     | Cs2g10770       | 3 |
| Csi-miR408.1     | —               | — |
| Csi-miR408.2     | —               | — |
| Csi-miR4369      | —               | — |
| Csi-miR4414.1    | —               | — |
| Csi-miR4414.2    | —               | — |
| Csi-miR443b.1    | —               | — |
| Csi-miR443b.2    | —               | — |
| Csi-miR444a.1    | Cs9g07680       | 3 |
| Csi-miR444a.1    | orange1.1t02003 | 3 |
| Csi-miR444a.2    | —               | — |
| Csi-miR472       | Cs2g30590       | 1 |
| Csi-miR472       | Cs7g26730       | 1 |
| Csi-miR473       | —               | — |
| Csi-miR473-3p    | Cs1g08770       | 3 |
| Csi-miR477a.1    | —               | — |
| Csi-miR477a.2    | —               | — |
| Csi-miR477a-3p   | Cs7g09520       | 2 |
| Csi-miR477b.2    | —               | — |
| Csi-miR477d.1-3p | —               | — |
| Csi-miR477d.2-5p | —               | — |
| Csi-miR479.1     | —               | — |
| Csi-miR479.2     | —               | — |
| Csi-miR482a-3p   | Cs5g18480       | 1 |
| Csi-miR482a-3p   | Cs5g19920       | 1 |
| Csi-miR482a-5p   | —               | — |
| Csi-miR482b      | Cs1g11740       | 1 |
| Csi-miR482c      | Cs9g06846       | 1 |

|                  |                 |   |
|------------------|-----------------|---|
| Csi-miR482d      | Cs1g11740       | 1 |
| Csi-miR482d-5p.1 | —               | — |
| Csi-miR482d-5p.2 | —               | — |
| Csi-miR5054.1    | —               | — |
| Csi-miR5054.2    | —               | — |
| Csi-miR5177      | —               | — |
| Csi-miR5179      | —               | — |
| Csi-miR5225a     | —               | — |
| Csi-miR5291a     | —               | — |
| Csi-miR530a      | —               | — |
| Csi-miR530b      | Cs6g11650       | 3 |
| Csi-miR535.1     | orange1.1t02265 | 1 |
| Csi-miR535.1     | Cs2g05730       | 2 |
| Csi-miR535.1     | Cs4g05470       | 3 |
| Csi-miR535.2     | Cs2g05730       | 1 |
| Csi-miR535.2     | Cs7g10830       | 1 |
| Csi-miR535.2     | orange1.1t02265 | 1 |
| Csi-miR535.2     | Cs4g05470       | 3 |
| Csi-miR536-3p    | orange1.1t01470 | 1 |
| Csi-miR536-3p    | orange1.1t04955 | 1 |
| Csi-miR536-3p    | orange1.1t05081 | 1 |
| Csi-miR536-5p    | —               | — |
| Csi-miR814       | —               | — |
| Csi-miR827.1     | —               | — |
| Csi-miR827.2     | —               | — |
| Csi-miR827-5p.1  | —               | — |
| Csi-miR827-5p.2  | Cs4g14890       | 3 |
| Csi-miR828       | —               | — |
| Csi-miR833.1     | Cs8g03110       | 3 |
| Csi-miR845a      | —               | — |
| Csi-miR896       | —               | — |
| Csi-miRN01       | —               | — |
| Csi-miRN02       | Cs1g08400       | 1 |
| Csi-miRN02       | Cs3g18790       | 1 |
| Csi-miRN02       | Cs8g12570       | 1 |
| Csi-miRN02       | orange1.1t01714 | 3 |
| Csi-miRN03       | —               | — |
| Csi-miRN04       | —               | — |
| Csi-miRN05       | Cs4g19940       | 2 |
| Csi-miRN06       | —               | — |
| Csi-miRN07       | Cs8g09620       | 3 |
| Csi-miRN08       | —               | — |
| Csi-miRN09       | —               | — |
| Csi-miRN10       | —               | — |
| Csi-miRN11       | Cs8g13560       | 1 |

|            |                 |   |
|------------|-----------------|---|
| Csi-miRN12 | Cs4g06030       | 3 |
| Csi-miRN13 | —               | — |
| Csi-miRN14 | —               | — |
| Csi-miRN15 | —               | — |
| Csi-miRN16 | —               | — |
| Csi-miRN17 | —               | — |
| Csi-miRN18 | —               | — |
| Csi-miRN19 | —               | — |
| Csi-miRN20 | Cs3g05320       | 1 |
| Csi-miRN21 | —               | — |
| Csi-miRN22 | —               | — |
| Csi-miRN23 | —               | — |
| Csi-miRN24 | —               | — |
| Csi-miRN25 | —               | — |
| Csi-miRN26 | —               | — |
| Csi-miRN27 | —               | — |
| Csi-miRN28 | —               | — |
| Csi-miRN29 | —               | — |
| Csi-miRN30 | —               | — |
| Csi-miRN31 | —               | — |
| Csi-miRN32 | —               | — |
| Csi-miRN33 | —               | — |
| Csi-miRN34 | —               | — |
| Csi-miRN35 | —               | — |
| Csi-miRN36 | —               | — |
| Csi-miRN37 | orange1.1t02400 | 2 |
| Csi-miRN38 | —               | — |

**b. Targets of miRNAs identified in flower using degradome sequencing**

| miRNA          | Target    | Category |
|----------------|-----------|----------|
| Csi-miR1092.2  | Cs8g11330 | 3        |
| Csi-miR1432a   | Cs1g21570 | 3        |
| Csi-miR1446    | Cs7g23010 | 1        |
| Csi-miR1507a.2 | —         | —        |
| Csi-miR1515    | —         | —        |
| Csi-miR156a.1  | Cs2g23550 | 1        |
| Csi-miR156a.1  | Cs2g05730 | 1        |
| Csi-miR156a.2  | Cs2g23550 | 1        |
| Csi-miR156a.2  | Cs2g05730 | 1        |
| Csi-miR156b.1  | Cs2g23550 | 1        |
| Csi-miR156b.1  | Cs2g05730 | 1        |
| Csi-miR156c.1  | Cs2g23550 | 1        |
| Csi-miR156c.1  | Cs2g05730 | 1        |
| Csi-miR156d    | Cs2g23550 | 1        |

|                 |                 |   |
|-----------------|-----------------|---|
| Csi-miR156d     | Cs2g05730       | 1 |
| Csi-miR156e     | Cs2g23550       | 1 |
| Csi-miR156e     | Cs2g05730       | 1 |
| Csi-miR156f.2   | Cs2g23550       | 1 |
| Csi-miR156f.2   | Cs2g05730       | 1 |
| Csi-miR156f.2   | Cs8g19900       | 2 |
| Csi-miR156g.1   | Cs2g23550       | 1 |
| Csi-miR156g.1   | Cs2g05730       | 1 |
| Csi-miR156g.2   | Cs2g23550       | 1 |
| Csi-miR156g.2   | Cs2g05730       | 1 |
| Csi-miR156h     | Cs2g23550       | 1 |
| Csi-miR156h     | Cs2g05730       | 1 |
| Csi-miR159      | Cs3g06390       | 1 |
| Csi-miR159b     | Cs3g06390       | 1 |
| Csi-miR160a-3p  | Cs9g06430       | 3 |
| Csi-miR160a-5p  | —               | — |
| Csi-miR160b-3p  | —               | — |
| Csi-miR160b-5p  | —               | — |
| Csi-miR160c.1   | —               | — |
| Csi-miR160c.2   | —               | — |
| Csi-miR162-3p.1 | orange1.1t00584 | 2 |
| Csi-miR162-3p.2 | orange1.1t00584 | 2 |
| Csi-miR164      | Cs5g10870       | 1 |
| Csi-miR166a.1   | Cs8g16510       | 1 |
| Csi-miR166a.1   | Cs2g09770       | 3 |
| Csi-miR166a.2   | Cs8g16510       | 1 |
| Csi-miR166a.2   | Cs2g09770       | 3 |
| Csi-miR166b     | Cs8g16510       | 1 |
| Csi-miR166b     | Cs2g09770       | 3 |
| Csi-miR166c.1   | Cs8g16510       | 1 |
| Csi-miR166c.1   | Cs2g09770       | 2 |
| Csi-miR166c.2   | Cs8g16510       | 1 |
| Csi-miR166c.2   | Cs2g09770       | 2 |
| Csi-miR166c.3   | Cs8g16510       | 1 |
| Csi-miR166c.3   | Cs2g09770       | 2 |
| Csi-miR166c.4   | Cs8g16510       | 1 |
| Csi-miR166c.4   | Cs2g09770       | 2 |
| Csi-miR166c.5   | Cs8g16510       | 1 |
| Csi-miR166c.5   | Cs2g09770       | 2 |
| Csi-miR166d.1   | Cs8g16510       | 1 |
| Csi-miR166d.1   | Cs2g09770       | 3 |
| Csi-miR166d.2   | Cs8g16510       | 1 |
| Csi-miR166d.2   | Cs2g09770       | 3 |
| Csi-miR166g.1   | Cs8g16510       | 1 |
| Csi-miR166g.1   | Cs2g09770       | 2 |

|                  |                 |   |
|------------------|-----------------|---|
| Csi-miR166i      | Cs8g16510       | 1 |
| Csi-miR166i      | Cs2g09770       | 2 |
| Csi-miR166j.1    | Cs8g16510       | 1 |
| Csi-miR166j.1    | Cs2g09770       | 3 |
| Csi-miR166j.2    | Cs4g14480       | 3 |
| Csi-miR166j.3    | Cs8g16510       | 1 |
| Csi-miR166j.3    | Cs2g09770       | 3 |
| Csi-miR167a.1    | Cs2g15130       | 1 |
| Csi-miR167a.1    | Cs8g08320       | 3 |
| Csi-miR167b.1    | Cs2g15130       | 1 |
| Csi-miR167b.1    | Cs8g08320       | 3 |
| Csi-miR167b.2    | Cs1g09030       | 3 |
| Csi-miR167b.3    | Cs2g15130       | 1 |
| Csi-miR167b.4    | Cs2g15130       | 1 |
| Csi-miR167b.4    | Cs8g08320       | 3 |
| Csi-miR167d.1    | Cs8g08320       | 3 |
| Csi-miR167d.2    | Cs2g15130       | 1 |
| Csi-miR167d.2    | Cs8g08320       | 3 |
| Csi-miR168a      | Cs5g16710       | 3 |
| Csi-miR169b.1    | Cs6g13560       | 1 |
| Csi-miR169b.1-3p | Cs9g16380       | 3 |
| Csi-miR169b.1-3p | Cs2g28180       | 3 |
| Csi-miR169i.1    | Cs6g13560       | 1 |
| Csi-miR169i.1-3p | orange1.1t00423 | 3 |
| Csi-miR169m.1    | Cs6g13560       | 1 |
| Csi-miR169m.1    | Cs3g24090       | 1 |
| Csi-miR169m.2    | Cs3g24090       | 1 |
| Csi-miR169m.3    | Cs7g06000       | 3 |
| Csi-miR171a.1    | Cs2g24890       | 3 |
| Csi-miR171b      | Cs4g09320       | 3 |
| Csi-miR171d      | Cs9g19410       | 3 |
| Csi-miR171g.1    | orange1.1t00199 | 1 |
| Csi-miR171g.1    | orange1.1t00200 | 1 |
| Csi-miR172a-3p.1 | orange1.1t04055 | 3 |
| Csi-miR172a-3p.1 | Cs8g17390       | 3 |
| Csi-miR172a-3p.2 | orange1.1t04055 | 3 |
| Csi-miR172a-3p.2 | Cs8g17390       | 3 |
| Csi-miR172a-3p.3 | orange1.1t04055 | 3 |
| Csi-miR172a-3p.3 | Cs8g17390       | 3 |
| Csi-miR172c.1    | Cs3g06140       | 1 |
| Csi-miR172c.1    | orange1.1t04055 | 3 |
| Csi-miR172c.1    | Cs8g17390       | 3 |
| Csi-miR172c.1    | Cs1g21180       | 3 |
| Csi-miR172c.2    | orange1.1t04055 | 3 |
| Csi-miR172c.2    | Cs8g17390       | 3 |

|                  |                 |   |
|------------------|-----------------|---|
| Csi-miR172d      | orange1.1t04055 | 3 |
| Csi-miR172d      | Cs8g17390       | 3 |
| Csi-miR172d-3p   | Cs9g03090       | 1 |
| Csi-miR172e.2    | orange1.1t04055 | 2 |
| Csi-miR172e.2    | Cs8g17390       | 3 |
| Csi-miR172k      | orange1.1t04055 | 3 |
| Csi-miR172k      | Cs8g17390       | 3 |
| Csi-miR2111      | Cs5g29630       | 3 |
| Csi-miR2118.1    | Cs6g12050       | 3 |
| Csi-miR2118.2    | Cs3g12850       | 1 |
| Csi-miR2118.2    | Cs3g12760       | 1 |
| Csi-miR2118.2    | Cs3g12720       | 1 |
| Csi-miR2118.2    | orange1.1t00149 | 2 |
| Csi-miR2275a     | orange1.1t02313 | 3 |
| Csi-miR2275b     | Cs2g10790       | 3 |
| Csi-miR2275c.1   | Cs2g10790       | 3 |
| Csi-miR2275d     | Cs8g02270.1     | 3 |
| Csi-miR2275d     | Cs2g06980       | 3 |
| Csi-miR2275d-3p  | —               | — |
| Csi-miR2275e     | —               | — |
| Csi-miR2275f     | Cs4g12820       | 3 |
| Csi-miR2911      | —               | — |
| Csi-miR319       | Cs3g06390       | 1 |
| Csi-miR319a      | Cs1g06290       | 3 |
| Csi-miR319b      | Cs3g06390       | 1 |
| Csi-miR390.1     | Cs9g01780       | 1 |
| Csi-miR390.2     | Cs9g01780       | 1 |
| Csi-miR390-3p.1  | —               | — |
| Csi-miR390-3p.2  | Cs8g04530       | 3 |
| Csi-miR390b      | Cs9g01780       | 1 |
| Csi-miR391a.1    | Cs5g17560       | 3 |
| Csi-miR391a.2    | —               | — |
| Csi-miR391a.3    | —               | — |
| Csi-miR391b      | —               | — |
| Csi-miR393a.1    | Cs7g31800       | 3 |
| Csi-miR393a.2    | orange1.1t02367 | 3 |
| Csi-miR393a.2-3p | Cs9g05070       | 3 |
| Csi-miR393a.3    | orange1.1t02367 | 3 |
| Csi-miR393b      | orange1.1t02367 | 3 |
| Csi-miR393b-3p   | Cs5g31220       | 3 |
| Csi-miR394       | Cs5g08980       | 3 |
| Csi-miR394-3p.1  | Cs3g09210       | 3 |
| Csi-miR394-3p.2  | Cs8g14600       | 3 |
| Csi-miR394-3p.3  | —               | — |
| Csi-miR395.1     | orange1.1t01708 | 3 |

|                  |                 |   |
|------------------|-----------------|---|
| Csi-miR395.2     | Cs5g34330       | 3 |
| Csi-miR3951      | orange1.1t05622 | 1 |
| Csi-miR3951-3p   | Cs2g03130       | 3 |
| Csi-miR3952.1    | Cs8g13286       | 2 |
| Csi-miR3952.2    | Cs8g13286       | 2 |
| Csi-miR3952-3p   | Cs8g13286       | 3 |
| Csi-miR3954a     | Cs1g09600       | 1 |
| Csi-miR3954a     | Cs5g04670       | 3 |
| Csi-miR3954a     | Cs1g09635       | 3 |
| Csi-miR3954b     | Cs1g09600       | 1 |
| Csi-miR3954b     | Cs2g29120       | 1 |
| Csi-miR3954b     | Cs1g09635       | 3 |
| Csi-miR3954b     | Cs5g04670       | 3 |
| Csi-miR396a      | Cs6g15330       | 1 |
| Csi-miR396a      | Cs7g15220       | 1 |
| Csi-miR396a      | orange1.1t03122 | 1 |
| Csi-miR396a      | Cs1g22520       | 1 |
| Csi-miR396a      | Cs5g09850       | 2 |
| Csi-miR396a      | Cs3g23180       | 3 |
| Csi-miR396b.1    | Cs6g15330       | 1 |
| Csi-miR396b.1    | Cs7g15220       | 1 |
| Csi-miR396b.1    | orange1.1t03122 | 1 |
| Csi-miR396b.1    | Cs1g22520       | 1 |
| Csi-miR396b.1    | Cs5g09850       | 2 |
| Csi-miR396b.1    | Cs3g23180       | 3 |
| Csi-miR396b.2    | Cs6g15330       | 1 |
| Csi-miR396b.2    | Cs7g15220       | 1 |
| Csi-miR396b.2    | orange1.1t03122 | 1 |
| Csi-miR396b.2    | Cs1g22520       | 1 |
| Csi-miR396b.2    | orange1.1t02555 | 1 |
| Csi-miR396b.2    | Cs5g09850       | 2 |
| Csi-miR396b.2    | Cs3g23180       | 3 |
| Csi-miR396b.2    | Cs8g17370       | 3 |
| Csi-miR396b.3    | Cs6g15330       | 1 |
| Csi-miR396b.3    | Cs7g15220       | 1 |
| Csi-miR396b.3    | orange1.1t03122 | 1 |
| Csi-miR396b.3    | Cs1g22520       | 1 |
| Csi-miR396b.3    | Cs5g09850       | 2 |
| Csi-miR396b.3    | Cs3g23180       | 3 |
| Csi-miR396b-3p.1 | Cs9g04080       | 3 |
| Csi-miR396b-3p.2 | Cs9g04080       | 3 |
| Csi-miR396c      | Cs2g09460       | 3 |
| Csi-miR396d.1    | Cs6g15330       | 1 |
| Csi-miR396d.1    | Cs7g15220       | 1 |
| Csi-miR396d.1    | orange1.1t03122 | 1 |



|                |                 |   |
|----------------|-----------------|---|
| Csi-miR396d.1  | Cs1g22520       | 1 |
| Csi-miR396d.1  | Cs5g09850       | 2 |
| Csi-miR396d.1  | Cs3g23180       | 3 |
| Csi-miR396d.2  | Cs6g15330       | 1 |
| Csi-miR396d.2  | Cs7g15220       | 1 |
| Csi-miR396d.2  | orange1.1t03122 | 1 |
| Csi-miR396d.2  | Cs1g22520       | 1 |
| Csi-miR396d.2  | Cs5g09850       | 2 |
| Csi-miR396d.2  | Cs3g23180       | 3 |
| Csi-miR396d.3  | Cs6g15330       | 1 |
| Csi-miR396d.3  | Cs7g15220       | 1 |
| Csi-miR396d.3  | orange1.1t03122 | 1 |
| Csi-miR396d.3  | Cs1g22520       | 1 |
| Csi-miR396d.3  | Cs5g09850       | 2 |
| Csi-miR396d.3  | Cs3g23180       | 3 |
| Csi-miR396d.4  | orange1.1t03122 | 1 |
| Csi-miR396d.4  | Cs7g15220       | 1 |
| Csi-miR396d.4  | Cs6g15330       | 1 |
| Csi-miR396d.4  | Cs1g22520       | 1 |
| Csi-miR396d.4  | orange1.1t02555 | 1 |
| Csi-miR396d.4  | Cs5g09850       | 2 |
| Csi-miR396d.4  | Cs3g23180       | 3 |
| Csi-miR396d.4  | Cs8g17370       | 3 |
| Csi-miR396d-3p | Cs8g05290       | 3 |
| Csi-miR397.1   | Cs6g07450       | 2 |
| Csi-miR397.2   | Cs6g07410       | 1 |
| Csi-miR398b    | Cs1g13240       | 1 |
| Csi-miR399a    | Cs3g22510       | 3 |
| Csi-miR399b    | orange1.1t01536 | 3 |
| Csi-miR399c    | —               | — |
| Csi-miR399d    | Cs2g30260       | 3 |
| Csi-miR399e    | —               | — |
| Csi-miR399e-5p | Cs1g02320       | 3 |
| Csi-miR403.1   | Cs2g10760       | 1 |
| Csi-miR403.2   | Cs2g10760       | 1 |
| Csi-miR403.3   | Cs2g10760       | 1 |
| Csi-miR403.3   | Cs8g07240       | 3 |
| Csi-miR408.1   | Cs2g13550       | 3 |
| Csi-miR408.2   | Cs6g02740       | 3 |
| Csi-miR4369    | —               | — |
| Csi-miR4414.1  | —               | — |
| Csi-miR4414.2  | Cs3g26540       | 1 |
| Csi-miR4414.2  | orange1.1t02428 | 1 |
| Csi-miR443b.1  | —               | — |
| Csi-miR443b.2  | —               | — |

|                  |                 |   |
|------------------|-----------------|---|
| Csi-miR444a.1    | orange1.1t02003 | 2 |
| Csi-miR444a.2    | —               | — |
| Csi-miR472       | Cs7g26730       | 3 |
| Csi-miR473       | —               | — |
| Csi-miR473-3p    | orange1.1t02213 | 3 |
| Csi-miR477a.1    | —               | — |
| Csi-miR477a.2    | —               | — |
| Csi-miR477a-3p   | Cs7g09520       | 2 |
| Csi-miR477b.2    | Cs8g17030       | 3 |
| Csi-miR477d.1-3p | Cs2g02350       | 3 |
| Csi-miR477d.2-5p | Cs3g10900       | 3 |
| Csi-miR479.1     | Cs5g24810       | 3 |
| Csi-miR479.2     | Cs6g21570       | 3 |
| Csi-miR482a-3p   | —               | — |
| Csi-miR482a-5p   | —               | — |
| Csi-miR482b      | Cs1g13430       | 3 |
| Csi-miR482c      | Cs9g06846       | 3 |
| Csi-miR482d      | Cs6g10170       | 3 |
| Csi-miR482d-5p.1 | —               | — |
| Csi-miR482d-5p.2 | —               | — |
| Csi-miR5054.1    | —               | — |
| Csi-miR5054.2    | Cs7g07710       | 3 |
| Csi-miR5177      | —               | — |
| Csi-miR5179      | Cs1g24860       | 3 |
| Csi-miR5225a     | —               | — |
| Csi-miR5291a     | Cs1g02730       | 3 |
| Csi-miR530a      | Cs3g18550       | 3 |
| Csi-miR530b      | Cs4g05330       | 3 |
| Csi-miR530b      | Cs6g11650       | 3 |
| Csi-miR535.1     | Cs4g05470       | 3 |
| Csi-miR535.2     | Cs2g05730       | 1 |
| Csi-miR535.2     | Cs4g05470       | 3 |
| Csi-miR536-3p    | —               | — |
| Csi-miR536-5p    | Cs1g15460       | 3 |
| Csi-miR814       | —               | — |
| Csi-miR827.1     | —               | — |
| Csi-miR827.2     | —               | — |
| Csi-miR827-5p.1  | Cs1g24800       | 3 |
| Csi-miR827-5p.2  | Cs9g10630       | 3 |
| Csi-miR828       | orange1.1t00180 | 3 |
| Csi-miR833.1     | Cs9g02420       | 2 |
| Csi-miR845a      | —               | — |
| Csi-miR896       | —               | — |
| Csi-miRN01       | Cs5g31745       | 3 |
| Csi-miRN02       | Cs3g18790       | 2 |

|            |                 |   |
|------------|-----------------|---|
| Csi-miRN03 | Cs5g26760       | 3 |
| Csi-miRN04 | orange1.1t00471 | 3 |
| Csi-miRN05 | Cs4g19940       | 3 |
| Csi-miRN06 | —               | — |
| Csi-miRN07 | Cs8g09620       | 1 |
| Csi-miRN08 | —               | — |
| Csi-miRN09 | —               | — |
| Csi-miRN10 | Cs9g04330       | 3 |
| Csi-miRN11 | Cs8g13560       | 3 |
| Csi-miRN12 | Cs4g06030       | 2 |
| Csi-miRN13 | —               | — |
| Csi-miRN14 | Cs7g14990       | 3 |
| Csi-miRN15 | —               | — |
| Csi-miRN16 | Cs7g06555       | 3 |
| Csi-miRN17 | orange1.1t00471 | 3 |
| Csi-miRN18 | Cs7g24200       | 3 |
| Csi-miRN19 | Cs5g32800       | 3 |
| Csi-miRN20 | Cs3g05320       | 3 |
| Csi-miRN21 | —               | — |
| Csi-miRN22 | —               | — |
| Csi-miRN23 | Cs1g07330       | 3 |
| Csi-miRN24 | Cs4g01970       | 3 |
| Csi-miRN25 | —               | — |
| Csi-miRN26 | Cs9g18000       | 3 |
| Csi-miRN27 | —               | — |
| Csi-miRN28 | Cs3g17940       | 3 |
| Csi-miRN29 | —               | — |
| Csi-miRN30 | —               | — |
| Csi-miRN31 | —               | — |
| Csi-miRN32 | —               | — |
| Csi-miRN33 | Cs4g07210       | 3 |
| Csi-miRN34 | —               | — |
| Csi-miRN35 | —               | — |
| Csi-miRN36 | —               | — |
| Csi-miRN37 | orange1.1t02400 | 1 |
| Csi-miRN38 | —               | — |

**c. Targets of miRNAs identified in fruit using degradome sequencing**

| miRNA          | Target    | Category |
|----------------|-----------|----------|
| Csi-miR1092.2  | Cs8g11330 | 3        |
| Csi-miR1432a   | —         | —        |
| Csi-miR1446    | Cs2g01340 | 3        |
| Csi-miR1507a.2 | —         | —        |
| Csi-miR1515    | —         | —        |

|               |                 |   |
|---------------|-----------------|---|
| Csi-miR156a.1 | Cs2g23550       | 1 |
| Csi-miR156a.2 | Cs2g23550       | 1 |
| Csi-miR156a.2 | Cs7g11770       | 1 |
| Csi-miR156a.2 | Cs5g12260       | 1 |
| Csi-miR156a.2 | Cs3g10870       | 1 |
| Csi-miR156a.2 | Cs7g11770       | 1 |
| Csi-miR156a.2 | Cs5g12260       | 1 |
| Csi-miR156a.2 | Cs3g10870       | 1 |
| Csi-miR156a.2 | Cs2g17270       | 3 |
| Csi-miR156a.2 | orange1.1t01983 | 3 |
| Csi-miR156a.2 | orange1.1t01983 | 3 |
| Csi-miR156b.1 | Cs2g23550       | 1 |
| Csi-miR156b.1 | Cs7g11770       | 1 |
| Csi-miR156b.1 | Cs5g12260       | 1 |
| Csi-miR156b.1 | Cs3g10870       | 1 |
| Csi-miR156b.1 | orange1.1t01983 | 3 |
| Csi-miR156c.1 | Cs2g23550       | 1 |
| Csi-miR156c.1 | Cs7g11770       | 1 |
| Csi-miR156c.1 | Cs5g12260       | 1 |
| Csi-miR156c.1 | Cs3g10870       | 1 |
| Csi-miR156c.1 | Cs2g17270       | 3 |
| Csi-miR156d   | Cs2g23550       | 1 |
| Csi-miR156d   | Cs7g11770       | 1 |
| Csi-miR156e   | Cs2g23550       | 1 |
| Csi-miR156e   | Cs7g11770       | 1 |
| Csi-miR156e   | Cs4g07790       | 3 |
| Csi-miR156f.2 | Cs2g23550       | 1 |
| Csi-miR156f.2 | Cs7g11770       | 1 |
| Csi-miR156f.2 | Cs3g10870       | 1 |
| Csi-miR156f.2 | Cs5g12260       | 1 |
| Csi-miR156f.2 | Cs8g19900       | 2 |
| Csi-miR156f.2 | orange1.1t01983 | 3 |
| Csi-miR156g.1 | Cs2g23550       | 1 |
| Csi-miR156g.1 | Cs7g11770       | 1 |
| Csi-miR156g.2 | Cs2g23550       | 1 |
| Csi-miR156g.2 | Cs7g11770       | 1 |
| Csi-miR156h   | Cs2g23550       | 1 |
| Csi-miR156h   | Cs1g26030       | 1 |
| Csi-miR156h   | Cs7g11770       | 1 |
| Csi-miR156h   | Cs5g12260       | 1 |
| Csi-miR156h   | Cs3g10870       | 1 |
| Csi-miR156h   | orange1.1t01983 | 3 |
| Csi-miR159    | Cs8g05120       | 1 |
| Csi-miR159    | Cs3g10900       | 3 |
| Csi-miR159    | Cs6g10950       | 3 |

|                 |           |   |
|-----------------|-----------|---|
| Csi-miR159b     | —         | — |
| Csi-miR160a-3p  | —         | — |
| Csi-miR160a-5p  | —         | — |
| Csi-miR160b-3p  | —         | — |
| Csi-miR160b-5p  | —         | — |
| Csi-miR160c.1   | —         | — |
| Csi-miR160c.2   | —         | — |
| Csi-miR162-3p.1 | —         | — |
| Csi-miR162-3p.2 | Cs7g27400 | 3 |
| Csi-miR164      | Cs5g10870 | 1 |
| Csi-miR164      | Cs8g18140 | 3 |
| Csi-miR166a.1   | Cs8g16510 | 1 |
| Csi-miR166a.2   | Cs8g16510 | 1 |
| Csi-miR166b     | Cs8g16510 | 1 |
| Csi-miR166c.1   | Cs8g16510 | 1 |
| Csi-miR166c.2   | Cs8g16510 | 1 |
| Csi-miR166c.2   | Cs4g06030 | 2 |
| Csi-miR166c.3   | Cs8g16510 | 1 |
| Csi-miR166c.4   | Cs8g16510 | 1 |
| Csi-miR166c.5   | Cs8g16510 | 1 |
| Csi-miR166d.1   | Cs8g16510 | 1 |
| Csi-miR166d.2   | Cs8g16510 | 1 |
| Csi-miR166g.1   | Cs8g16510 | 1 |
| Csi-miR166i     | Cs8g16510 | 1 |
| Csi-miR166j.1   | Cs8g16510 | 1 |
| Csi-miR166j.2   | —         | — |
| Csi-miR166j.3   | Cs8g16510 | 1 |
| Csi-miR166j.3   | Cs4g04520 | 3 |
| Csi-miR167a.1   | Cs2g15130 | 2 |
| Csi-miR167a.1   | Cs8g08320 | 3 |
| Csi-miR167b.1   | Cs2g15130 | 2 |
| Csi-miR167b.1   | Cs8g08320 | 3 |
| Csi-miR167b.1   | Cs2g09440 | 3 |
| Csi-miR167b.2   | —         | — |
| Csi-miR167b.3   | Cs2g15130 | 2 |
| Csi-miR167b.3   | Cs8g07440 | 3 |
| Csi-miR167b.4   | Cs2g15130 | 2 |
| Csi-miR167b.4   | Cs8g08320 | 3 |
| Csi-miR167d.1   | Cs8g08320 | 3 |
| Csi-miR167d.2   | Cs2g15130 | 2 |
| Csi-miR167d.2   | Cs8g08320 | 3 |
| Csi-miR168a     | Cs5g05510 | 1 |
| Csi-miR168a     | Cs5g16710 | 2 |
| Csi-miR169b.1   | Cs7g27875 | 1 |
| Csi-miR169b.1   | Cs6g13560 | 2 |

|                  |                 |   |
|------------------|-----------------|---|
| Csi-miR169b.1-3p | Cs2g28180       | 2 |
| Csi-miR169b.1-3p | Cs9g16380       | 3 |
| Csi-miR169i.1    | Cs6g13560       | 2 |
| Csi-miR169i.1-3p | Cs4g06620       | 3 |
| Csi-miR169i.1-3p | Cs7g12040       | 3 |
| Csi-miR169m.1    | Cs6g13560       | 2 |
| Csi-miR169m.1    | Cs8g17280       | 3 |
| Csi-miR169m.2    | —               | — |
| Csi-miR169m.3    | —               | — |
| Csi-miR171a.1    | —               | — |
| Csi-miR171b      | —               | — |
| Csi-miR171d      | —               | — |
| Csi-miR171g.1    | orange1.1t00199 | 1 |
| Csi-miR171g.1    | orange1.1t00200 | 1 |
| Csi-miR172a-3p.1 | Cs2g04660       | 2 |
| Csi-miR172a-3p.1 | Cs7g02590       | 3 |
| Csi-miR172a-3p.1 | orange1.1t04055 | 3 |
| Csi-miR172a-3p.2 | Cs2g04660       | 2 |
| Csi-miR172a-3p.2 | orange1.1t04055 | 3 |
| Csi-miR172a-3p.3 | Cs2g04660       | 2 |
| Csi-miR172a-3p.3 | orange1.1t04055 | 3 |
| Csi-miR172a-3p.3 | Cs2g21180       | 3 |
| Csi-miR172c.1    | Cs2g21180       | 3 |
| Csi-miR172c.1    | Cs3g06140       | 1 |
| Csi-miR172c.1    | Cs2g04660       | 2 |
| Csi-miR172c.1    | Cs7g19400       | 3 |
| Csi-miR172c.1    | orange1.1t04055 | 3 |
| Csi-miR172c.1    | Cs1g21180       | 3 |
| Csi-miR172c.1    | Cs7g32470       | 3 |
| Csi-miR172c.1    | orange1.1t00903 | 3 |
| Csi-miR172c.2    | orange1.1t04055 | 3 |
| Csi-miR172d      | orange1.1t04055 | 3 |
| Csi-miR172d-3p   | Cs9g03090       | 2 |
| Csi-miR172d-3p   | Cs5g08980       | 3 |
| Csi-miR172d-3p   | Cs7g07030       | 3 |
| Csi-miR172d-3p   | Cs5g21000       | 3 |
| Csi-miR172e.2    | Cs6g08190       | 2 |
| Csi-miR172e.2    | orange1.1t04055 | 3 |
| Csi-miR172e.2    | Cs1g23980       | 3 |
| Csi-miR172k      | Cs4g17900       | 1 |
| Csi-miR172k      | orange1.1t04055 | 3 |
| Csi-miR172k      | orange1.1t00603 | 3 |
| Csi-miR2111      | —               | — |
| Csi-miR2118.1    | orange1.1t00557 | 2 |
| Csi-miR2118.2    | orange1.1t01829 | 1 |

|                  |                 |   |
|------------------|-----------------|---|
| Csi-miR2118.2    | Cs5g19440       | 1 |
| Csi-miR2118.2    | Cs3g12720       | 1 |
| Csi-miR2118.2    | Cs3g12760       | 1 |
| Csi-miR2118.2    | Cs3g12850       | 1 |
| Csi-miR2118.2    | Cs3g13390       | 1 |
| Csi-miR2118.2    | orange1.1t02518 | 1 |
| Csi-miR2118.2    | Cs3g13320       | 1 |
| Csi-miR2118.2    | orange1.1t00557 | 2 |
| Csi-miR2118.2    | Cs3g13340       | 2 |
| Csi-miR2118.2    | Cs3g13740       | 2 |
| Csi-miR2275a     | —               | — |
| Csi-miR2275b     | —               | — |
| Csi-miR2275c.1   | —               | — |
| Csi-miR2275d     | —               | — |
| Csi-miR2275d-3p  | —               | — |
| Csi-miR2275e     | —               | — |
| Csi-miR2275f     | —               | — |
| Csi-miR2911      | —               | — |
| Csi-miR319       | —               | — |
| Csi-miR319a      | —               | — |
| Csi-miR319b      | —               | — |
| Csi-miR390.1     | Cs9g01780       | 2 |
| Csi-miR390.2     | Cs9g01780       | 2 |
| Csi-miR390-3p.1  | —               | — |
| Csi-miR390-3p.2  | —               | — |
| Csi-miR390b      | Cs9g01780       | 2 |
| Csi-miR391a.1    | Cs5g17560       | 2 |
| Csi-miR391a.2    | —               | — |
| Csi-miR391a.3    | —               | — |
| Csi-miR391b      | —               | — |
| Csi-miR393a.1    | —               | — |
| Csi-miR393a.2    | —               | — |
| Csi-miR393a.2-3p | orange1.1t01772 | 3 |
| Csi-miR393a.3    | —               | — |
| Csi-miR393b      | —               | — |
| Csi-miR393b-3p   | —               | — |
| Csi-miR394       | orange1.1t03542 | 3 |
| Csi-miR394-3p.1  | Cs3g09210       | 3 |
| Csi-miR394-3p.2  | Cs8g14600       | 3 |
| Csi-miR394-3p.3  | —               | — |
| Csi-miR395.1     | —               | — |
| Csi-miR395.2     | —               | — |
| Csi-miR3951      | orange1.1t05622 | 2 |
| Csi-miR3951      | Cs1g06060       | 2 |
| Csi-miR3951-3p   | Cs6g09300       | 3 |

|                |                 |   |
|----------------|-----------------|---|
| Csi-miR3952.1  | Cs8g13286       | 3 |
| Csi-miR3952.2  | Cs8g13286       | 3 |
| Csi-miR3952-3p | Cs8g13286       | 3 |
| Csi-miR3954a   | Cs5g04670       | 2 |
| Csi-miR3954a   | Cs1g09600       | 3 |
| Csi-miR3954b   | Cs5g04670       | 2 |
| Csi-miR3954b   | Cs2g28990       | 3 |
| Csi-miR3954b   | Cs1g09600       | 3 |
| Csi-miR396a    | Cs5g01380       | 1 |
| Csi-miR396a    | Cs7g15220       | 1 |
| Csi-miR396a    | Cs7g12930       | 1 |
| Csi-miR396a    | orange1.1t03122 | 2 |
| Csi-miR396a    | Cs5g19200       | 2 |
| Csi-miR396a    | Cs3g23180       | 3 |
| Csi-miR396a    | orange1.1t02254 | 3 |
| Csi-miR396a    | Cs3g07260       | 3 |
| Csi-miR396b.1  | Cs5g01380       | 1 |
| Csi-miR396b.1  | Cs7g15220       | 1 |
| Csi-miR396b.1  | Cs7g12930       | 1 |
| Csi-miR396b.1  | orange1.1t02555 | 1 |
| Csi-miR396b.1  | orange1.1t03122 | 2 |
| Csi-miR396b.1  | Cs5g19200       | 2 |
| Csi-miR396b.1  | Cs3g23180       | 3 |
| Csi-miR396b.1  | orange1.1t02254 | 3 |
| Csi-miR396b.1  | Cs3g07260       | 3 |
| Csi-miR396b.2  | Cs5g01380       | 1 |
| Csi-miR396b.2  | orange1.1t02555 | 1 |
| Csi-miR396b.2  | Cs7g15220       | 1 |
| Csi-miR396b.2  | Cs7g12930       | 1 |
| Csi-miR396b.2  | Cs4g07730       | 1 |
| Csi-miR396b.2  | orange1.1t03122 | 2 |
| Csi-miR396b.2  | Cs5g19200       | 2 |
| Csi-miR396b.2  | Cs7g23200       | 2 |
| Csi-miR396b.2  | Cs9g05650       | 2 |
| Csi-miR396b.2  | Cs3g23180       | 3 |
| Csi-miR396b.2  | orange1.1t02254 | 3 |
| Csi-miR396b.2  | Cs3g07260       | 3 |
| Csi-miR396b.2  | Cs9g19220       | 3 |
| Csi-miR396b.2  | Cs6g06540       | 3 |
| Csi-miR396b.2  | Cs6g04030       | 3 |
| Csi-miR396b.2  | Cs8g04510       | 3 |
| Csi-miR396b.2  | Cs8g17370       | 3 |
| Csi-miR396b.2  | Cs1g21890       | 3 |
| Csi-miR396b.2  | Cs5g23130       | 3 |
| Csi-miR396b.2  | Cs7g11670       | 3 |



|                  |                 |   |
|------------------|-----------------|---|
| Csi-miR396b.2    | Cs5g05620       | 3 |
| Csi-miR396b.2    | orange1.1t01932 | 3 |
| Csi-miR396b.2    | Cs6g20570       | 3 |
| Csi-miR396b.2    | orange1.1t02489 | 3 |
| Csi-miR396b.2    | orange1.1t02492 | 3 |
| Csi-miR396b.2    | Cs2g08090       | 3 |
| Csi-miR396b.2    | Cs5g24150       | 3 |
| Csi-miR396b.2    | Cs9g17470       | 3 |
| Csi-miR396b.2    | Cs7g18780       | 3 |
| Csi-miR396b.3    | Cs5g01380       | 1 |
| Csi-miR396b.3    | orange1.1t02555 | 1 |
| Csi-miR396b.3    | Cs7g15220       | 1 |
| Csi-miR396b.3    | Cs7g12930       | 1 |
| Csi-miR396b.3    | Cs5g19200       | 2 |
| Csi-miR396b.3    | orange1.1t03122 | 2 |
| Csi-miR396b.3    | Cs3g23180       | 3 |
| Csi-miR396b.3    | Cs9g19220       | 3 |
| Csi-miR396b.3    | orange1.1t02254 | 3 |
| Csi-miR396b-3p.1 | —               | — |
| Csi-miR396b-3p.2 | Cs8g05290       | 2 |
| Csi-miR396c      | Cs5g07360       | 2 |
| Csi-miR396c      | Cs2g27200       | 3 |
| Csi-miR396d.1    | Cs5g01380       | 1 |
| Csi-miR396d.1    | orange1.1t02555 | 1 |
| Csi-miR396d.1    | Cs7g15220       | 1 |
| Csi-miR396d.1    | Cs7g12930       | 1 |
| Csi-miR396d.1    | Cs5g19200       | 2 |
| Csi-miR396d.1    | orange1.1t03122 | 2 |
| Csi-miR396d.1    | Cs4g12200       | 2 |
| Csi-miR396d.1    | Cs3g23180       | 3 |
| Csi-miR396d.1    | Cs9g19220       | 3 |
| Csi-miR396d.2    | Cs5g01380       | 1 |
| Csi-miR396d.2    | orange1.1t02555 | 1 |
| Csi-miR396d.2    | Cs7g15220       | 1 |
| Csi-miR396d.2    | Cs5g19200       | 2 |
| Csi-miR396d.2    | orange1.1t03122 | 2 |
| Csi-miR396d.2    | Cs3g23180       | 3 |
| Csi-miR396d.2    | Cs8g17370       | 3 |
| Csi-miR396d.2    | Cs9g19220       | 3 |
| Csi-miR396d.2    | Cs2g09620       | 3 |
| Csi-miR396d.3    | Cs5g01380       | 1 |
| Csi-miR396d.3    | orange1.1t02555 | 1 |
| Csi-miR396d.3    | Cs7g15220       | 1 |
| Csi-miR396d.3    | Cs7g12930       | 1 |
| Csi-miR396d.3    | orange1.1t03122 | 2 |

|                |                 |   |
|----------------|-----------------|---|
| Csi-miR396d.3  | Cs4g12200       | 2 |
| Csi-miR396d.3  | Cs9g19220       | 2 |
| Csi-miR396d.3  | Cs5g07120       | 2 |
| Csi-miR396d.3  | Cs1g15720       | 2 |
| Csi-miR396d.3  | Cs3g23180       | 3 |
| Csi-miR396d.3  | Cs5g19200       | 3 |
| Csi-miR396d.3  | Cs8g17370       | 3 |
| Csi-miR396d.3  | orange1.1t02254 | 3 |
| Csi-miR396d.3  | Cs8g15450       | 3 |
| Csi-miR396d.3  | Cs9g14020       | 3 |
| Csi-miR396d.4  | Cs5g01380       | 1 |
| Csi-miR396d.4  | orange1.1t02555 | 1 |
| Csi-miR396d.4  | Cs7g15220       | 1 |
| Csi-miR396d.4  | Cs7g12930       | 1 |
| Csi-miR396d.4  | orange1.1t03122 | 2 |
| Csi-miR396d.4  | Cs5g19200       | 2 |
| Csi-miR396d.4  | Cs1g15720       | 2 |
| Csi-miR396d.4  | Cs4g12200       | 2 |
| Csi-miR396d.4  | orange1.1t02739 | 2 |
| Csi-miR396d.4  | Cs5g07120       | 2 |
| Csi-miR396d.4  | Cs3g23180       | 3 |
| Csi-miR396d.4  | Cs8g17370       | 3 |
| Csi-miR396d.4  | Cs6g06560       | 3 |
| Csi-miR396d.4  | orange1.1t02254 | 3 |
| Csi-miR396d.4  | Cs9g14020       | 3 |
| Csi-miR396d.4  | Cs3g07260       | 3 |
| Csi-miR396d.4  | Cs9g19220       | 3 |
| Csi-miR396d.4  | Cs8g15450       | 3 |
| Csi-miR396d.4  | Cs6g06540       | 3 |
| Csi-miR396d.4  | Cs4g18150       | 3 |
| Csi-miR396d.4  | Cs6g04030       | 3 |
| Csi-miR396d.4  | Cs1g16550       | 3 |
| Csi-miR396d-3p | Cs8g05290       | 2 |
| Csi-miR397.1   | —               | — |
| Csi-miR397.2   | —               | — |
| Csi-miR398b    | Cs1g13240       | 1 |
| Csi-miR399a    | —               | — |
| Csi-miR399b    | —               | — |
| Csi-miR399c    | —               | — |
| Csi-miR399d    | Cs4g08850       | 3 |
| Csi-miR399e    | —               | — |
| Csi-miR399e-5p | orange1.1t03762 | 3 |
| Csi-miR403.1   | —               | — |
| Csi-miR403.2   | —               | — |
| Csi-miR403.3   | Cs9g07320       | 3 |

|                  |                 |   |
|------------------|-----------------|---|
| Csi-miR403.3     | Cs8g07240       | 3 |
| Csi-miR403.3     | Cs3g01650       | 3 |
| Csi-miR408.1     | —               | — |
| Csi-miR408.2     | —               | — |
| Csi-miR4369      | —               | — |
| Csi-miR4414.1    | —               | — |
| Csi-miR4414.2    | —               | — |
| Csi-miR443b.1    | —               | — |
| Csi-miR443b.2    | —               | — |
| Csi-miR444a.1    | orange1.1t01329 | 2 |
| Csi-miR444a.2    | Cs8g15380       | 3 |
| Csi-miR472       | Cs2g30590       | 1 |
| Csi-miR472       | Cs1g13430       | 1 |
| Csi-miR472       | orange1.1t01918 | 1 |
| Csi-miR473       | —               | — |
| Csi-miR473-3p    | —               | — |
| Csi-miR477a.1    | —               | — |
| Csi-miR477a.2    | —               | — |
| Csi-miR477a-3p   | Cs6g19680       | 3 |
| Csi-miR477b.2    | Cs3g10900       | 3 |
| Csi-miR477d.1-3p | —               | — |
| Csi-miR477d.2-5p | Cs3g10900       | 3 |
| Csi-miR479.1     | —               | — |
| Csi-miR479.2     | —               | — |
| Csi-miR482a-3p   | orange1.1t01829 | 1 |
| Csi-miR482a-3p   | Cs5g19440       | 1 |
| Csi-miR482a-3p   | Cs1g15550       | 1 |
| Csi-miR482a-3p   | orange1.1t01918 | 1 |
| Csi-miR482a-3p   | Cs3g13390       | 1 |
| Csi-miR482a-3p   | orange1.1t02518 | 1 |
| Csi-miR482a-3p   | Cs3g13320       | 1 |
| Csi-miR482a-3p   | Cs3g13340       | 2 |
| Csi-miR482a-3p   | Cs3g13740       | 2 |
| Csi-miR482a-5p   | —               | — |
| Csi-miR482b      | Cs1g13430       | 1 |
| Csi-miR482c      | —               | — |
| Csi-miR482d      | Cs5g21975       | 3 |
| Csi-miR482d-5p.1 | Cs1g02710       | 3 |
| Csi-miR482d-5p.2 | —               | — |
| Csi-miR5054.1    | —               | — |
| Csi-miR5054.2    | Cs2g09030       | 2 |
| Csi-miR5177      | —               | — |
| Csi-miR5179      | —               | — |
| Csi-miR5225a     | —               | — |
| Csi-miR5291a     | —               | — |

|                 |                 |   |
|-----------------|-----------------|---|
| Csi-miR530a     | —               | — |
| Csi-miR530b     | Cs4g14880       | 3 |
| Csi-miR530b     | Cs6g11650       | 3 |
| Csi-miR535.1    | —               | — |
| Csi-miR535.2    | Cs7g11770       | 1 |
| Csi-miR535.2    | orange1.1t04075 | 3 |
| Csi-miR536-3p   | —               | — |
| Csi-miR536-5p   | —               | — |
| Csi-miR814      | —               | — |
| Csi-miR827.1    | Cs5g10180       | 3 |
| Csi-miR827.2    | Cs5g10180       | 3 |
| Csi-miR827-5p.1 | Cs1g24800       | 3 |
| Csi-miR827-5p.2 | Cs8g15030       | 2 |
| Csi-miR828      | orange1.1t00180 | 3 |
| Csi-miR833.1    | Cs9g02420       | 2 |
| Csi-miR833.1    | Cs5g27500       | 2 |
| Csi-miR845a     | —               | — |
| Csi-miR896      | —               | — |
| Csi-miRN01      | Cs8g10430       | 2 |
| Csi-miRN02      | Cs3g18790       | 1 |
| Csi-miRN02      | Cs8g09160       | 3 |
| Csi-miRN03      | orange1.1t02280 | 3 |
| Csi-miRN04      | Cs2g04030       | 3 |
| Csi-miRN05      | —               | — |
| Csi-miRN06      | —               | — |
| Csi-miRN07      | Cs6g11600       | 3 |
| Csi-miRN07      | Cs1g18270       | 3 |
| Csi-miRN08      | —               | — |
| Csi-miRN09      | —               | — |
| Csi-miRN10      | Cs4g05310       | 3 |
| Csi-miRN11      | Cs8g13560       | 1 |
| Csi-miRN12      | —               | — |
| Csi-miRN13      | —               | — |
| Csi-miRN14      | Cs7g14990       | 3 |
| Csi-miRN15      | —               | — |
| Csi-miRN16      | —               | — |
| Csi-miRN17      | Cs5g04990       | 3 |
| Csi-miRN18      | —               | — |
| Csi-miRN19      | Cs5g32800       | 3 |
| Csi-miRN20      | Cs3g05320       | 1 |
| Csi-miRN20      | Cs1g12230       | 1 |
| Csi-miRN21      | —               | — |
| Csi-miRN22      | —               | — |
| Csi-miRN23      | Cs1g07330       | 3 |
| Csi-miRN24      | Cs1g01190       | 3 |

|            |           |   |
|------------|-----------|---|
| Csi-miRN25 | —         | — |
| Csi-miRN26 | —         | — |
| Csi-miRN27 | Cs4g18880 | 3 |
| Csi-miRN28 | Cs4g15010 | 2 |
| Csi-miRN29 | —         | — |
| Csi-miRN30 | —         | — |
| Csi-miRN31 | —         | — |
| Csi-miRN32 | —         | — |
| Csi-miRN33 | —         | — |
| Csi-miRN34 | —         | — |
| Csi-miRN35 | —         | — |
| Csi-miRN36 | —         | — |
| Csi-miRN37 | Cs3g18880 | 2 |
| Csi-miRN37 | Cs7g08960 | 3 |
| Csi-miRN38 | —         | — |

---
