# Supplementary material for: Genome-wide comparison of microRNAs and their targeted transcripts among leaf, flower and fruit of sweet orange
Source: PubMed Central journal article supplement (PMC4158063; doi:10.1186/1471-2164-15-695), 2014-08-20
Supplement: 12864_2014_6413_MOESM4_ESM.pdf [file 12864_2014_6413_MOESM4_ESM.pdf]

**Additional file 4: T-plots of the miRNA targets in different tissues.**

Densities of the 5' positions of degradome tags matching each target gene are shown as T-plots. The miRNA-mediated degradome tag is highlighted in red.

T-plots for targets of all  
miRNAs in leaves

Csi-miR156a.1, target=Cs2g05730.1 gene=Cs2g05730  
 Category:1  
 Score=1  
 Cleavage Site=818

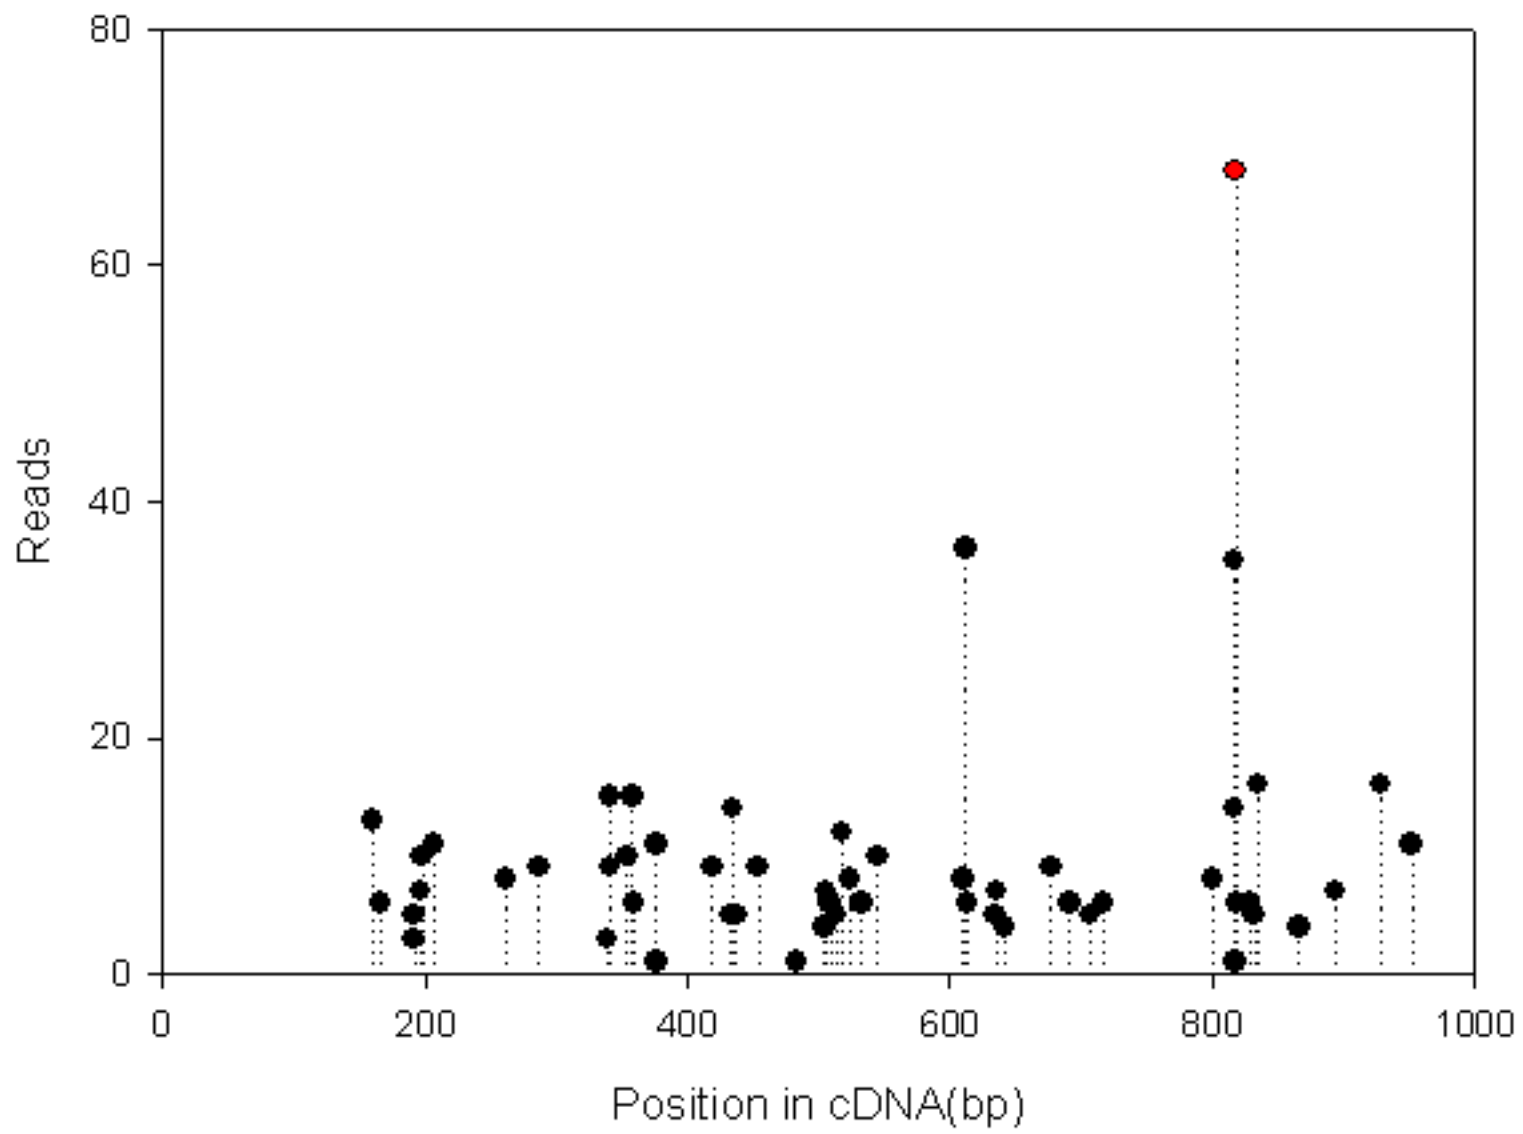

5' CGUGCUCUCUCUCUUCUGUCA AUGCU 3'  
 ::::: :::::::::::::::  
 3' -CACGAGUGAGAGAAGACAGUU---- 5'

Cs2g05730.1

Csi-miR156a.1

Csi-miR156a.1, target=Cs2g23550.1 gene=Cs2g23550  
 Category:1  
 Score=3  
 Cleavage Site=934

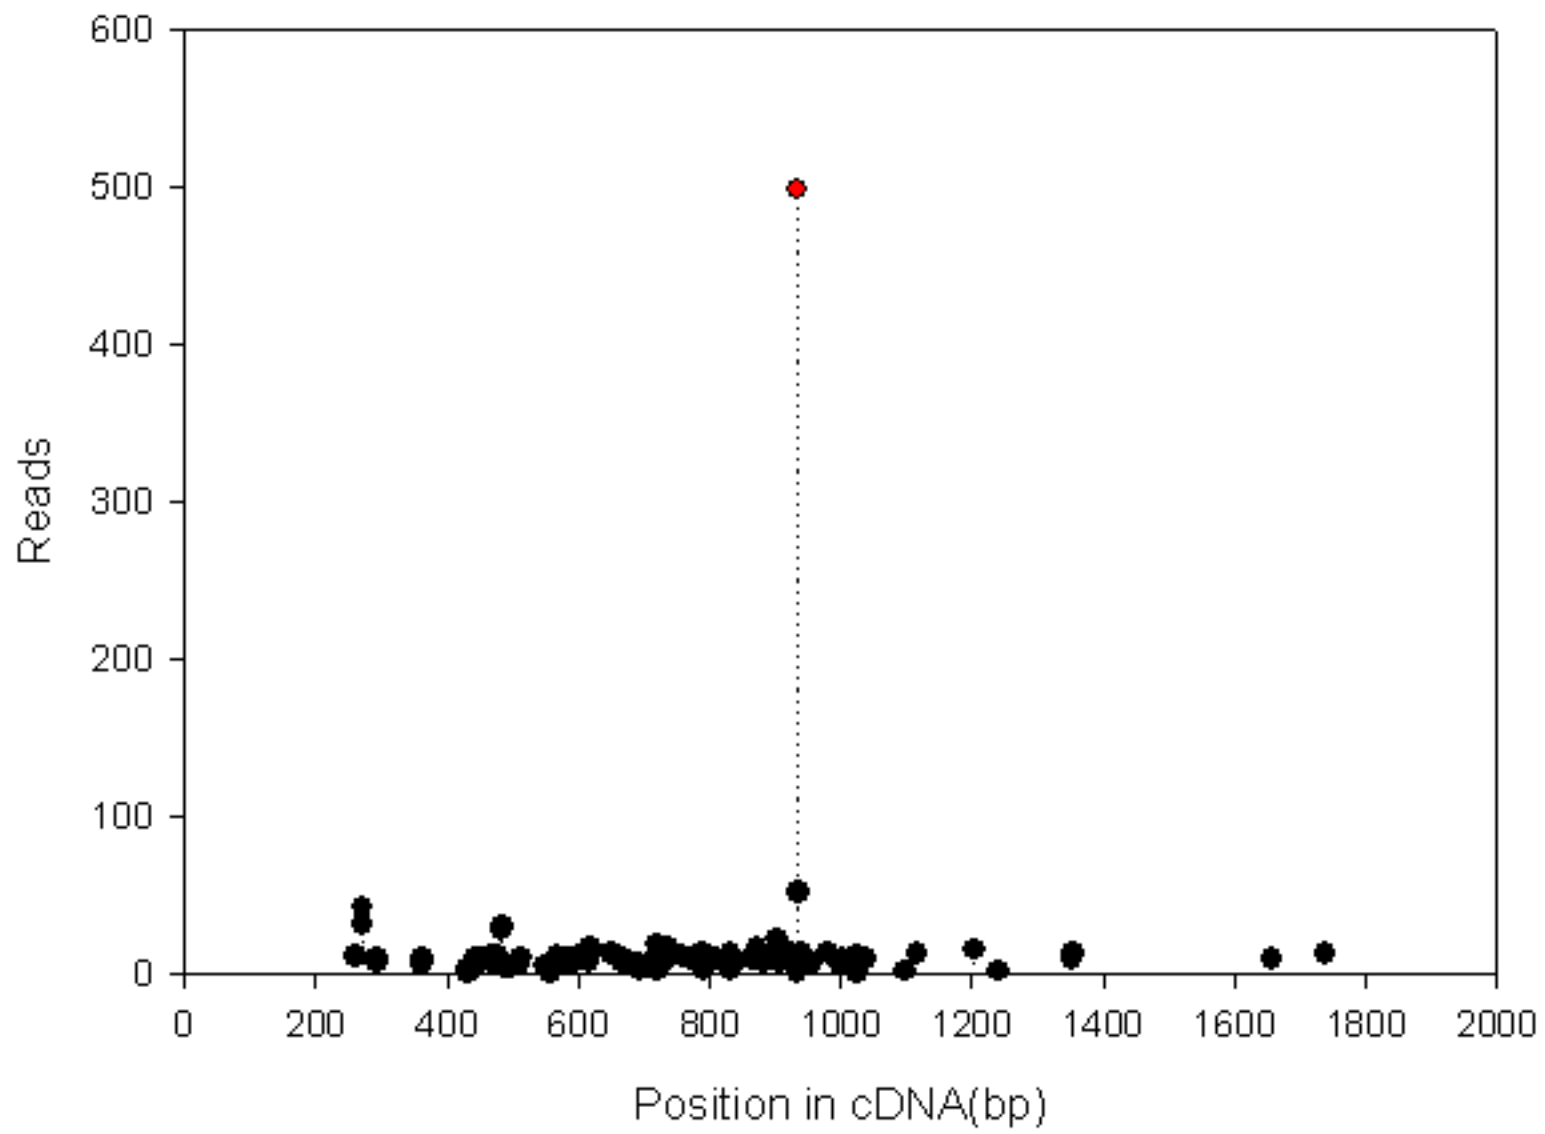

```

5' CAUGCUCUCUCUCUUCUGUCAUCCUA 3'           Cs2g23550.1
   : : : : : : : : : : : : : : : :
3' -CACGAGUGAGAGAAGACAGUU----- 5'       Csi-miR156a.1
  
```

Csi-miR156a.1, target=Cs5g11880.1 gene=Cs5g11880  
 Category:3  
 Score=5  
 Cleavage Site=554

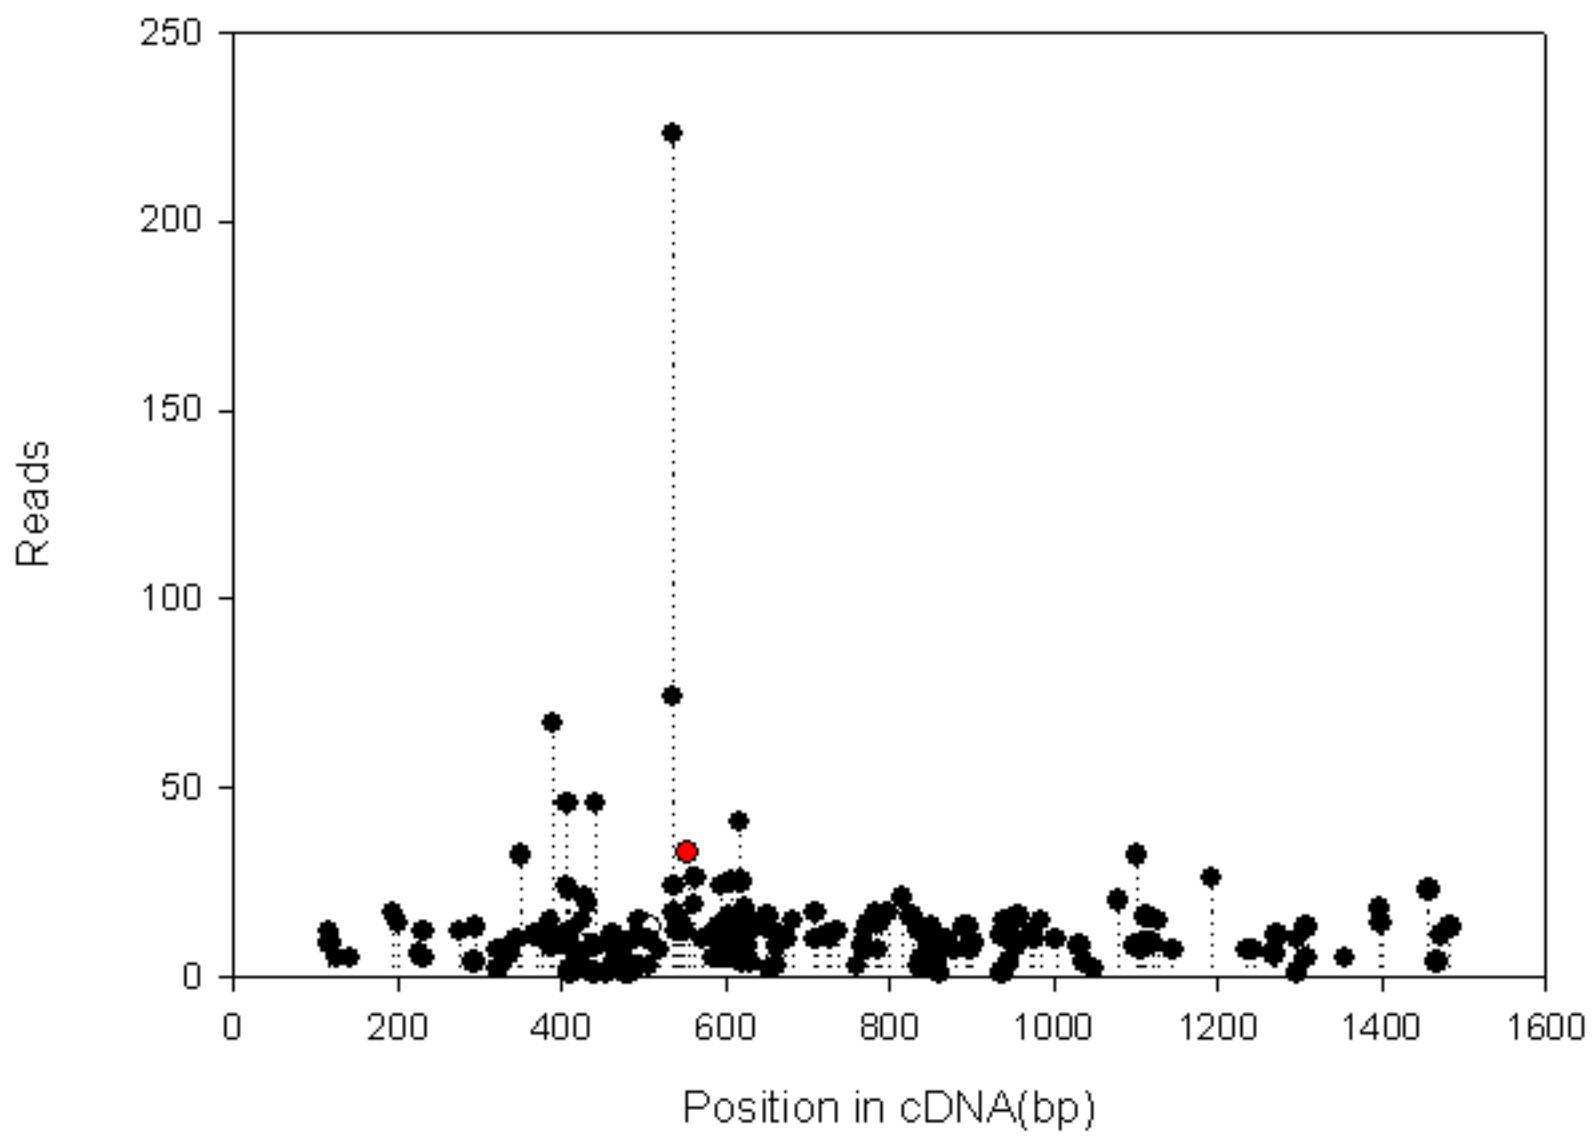

```

5' GUUAUUGUGACCA-UCUCUUCUGACAA 3'      Cs5g11880.1
   :::  ::  ::::::::::::::  :::
3' -----CACGAGUGAGAGAAGACAGUU 5'      Csi-miR156a.1
  
```

Csi-miR156a.1, target=Cs7g10830.1 gene=Cs7g10830  
 Category:1  
 Score=1  
 Cleavage Site=1183

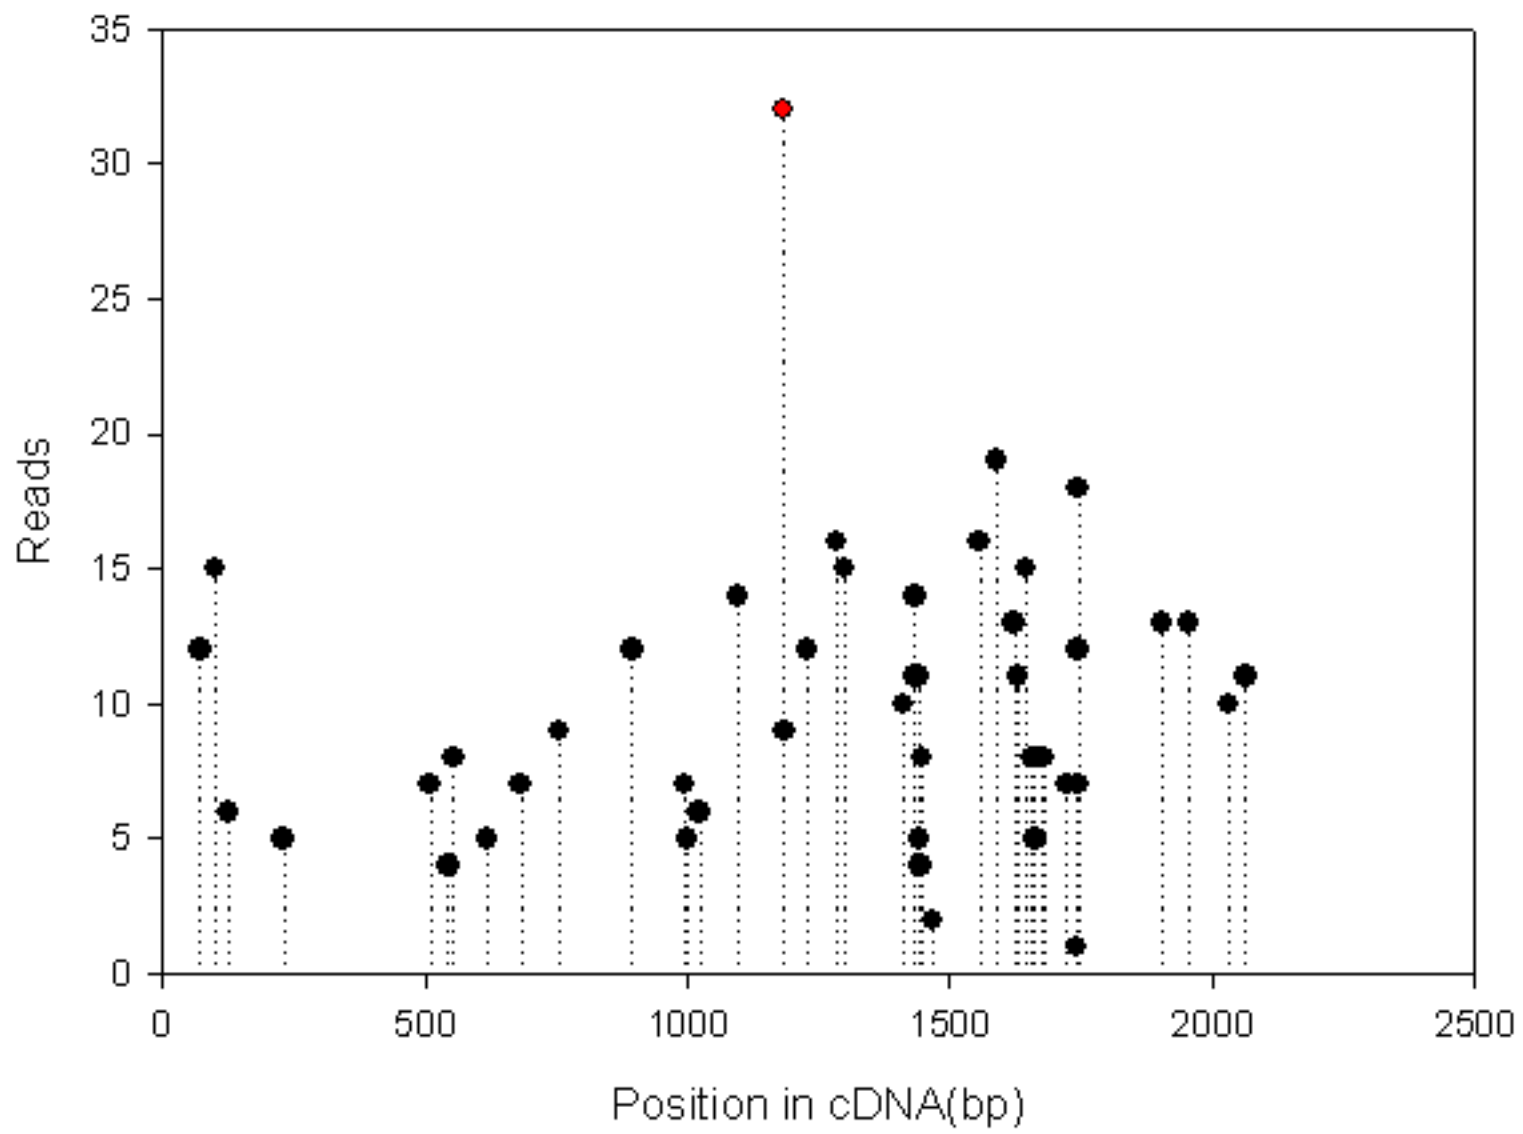

```

5' AGUGCUCUCUCUCUUCUGUCAAAAAC 3'      Cs7g10830.1
   : : : : : : : : : : : : : : : : :
3' -CACGAGUGAGAGAAGACAGUU----- 5'    Csi-miR156a.1

```

Csi-miR156a.1, target=Cs8g17370.1 gene=Cs8g17370  
 Category:3  
 Score=5  
 Cleavage Site=21

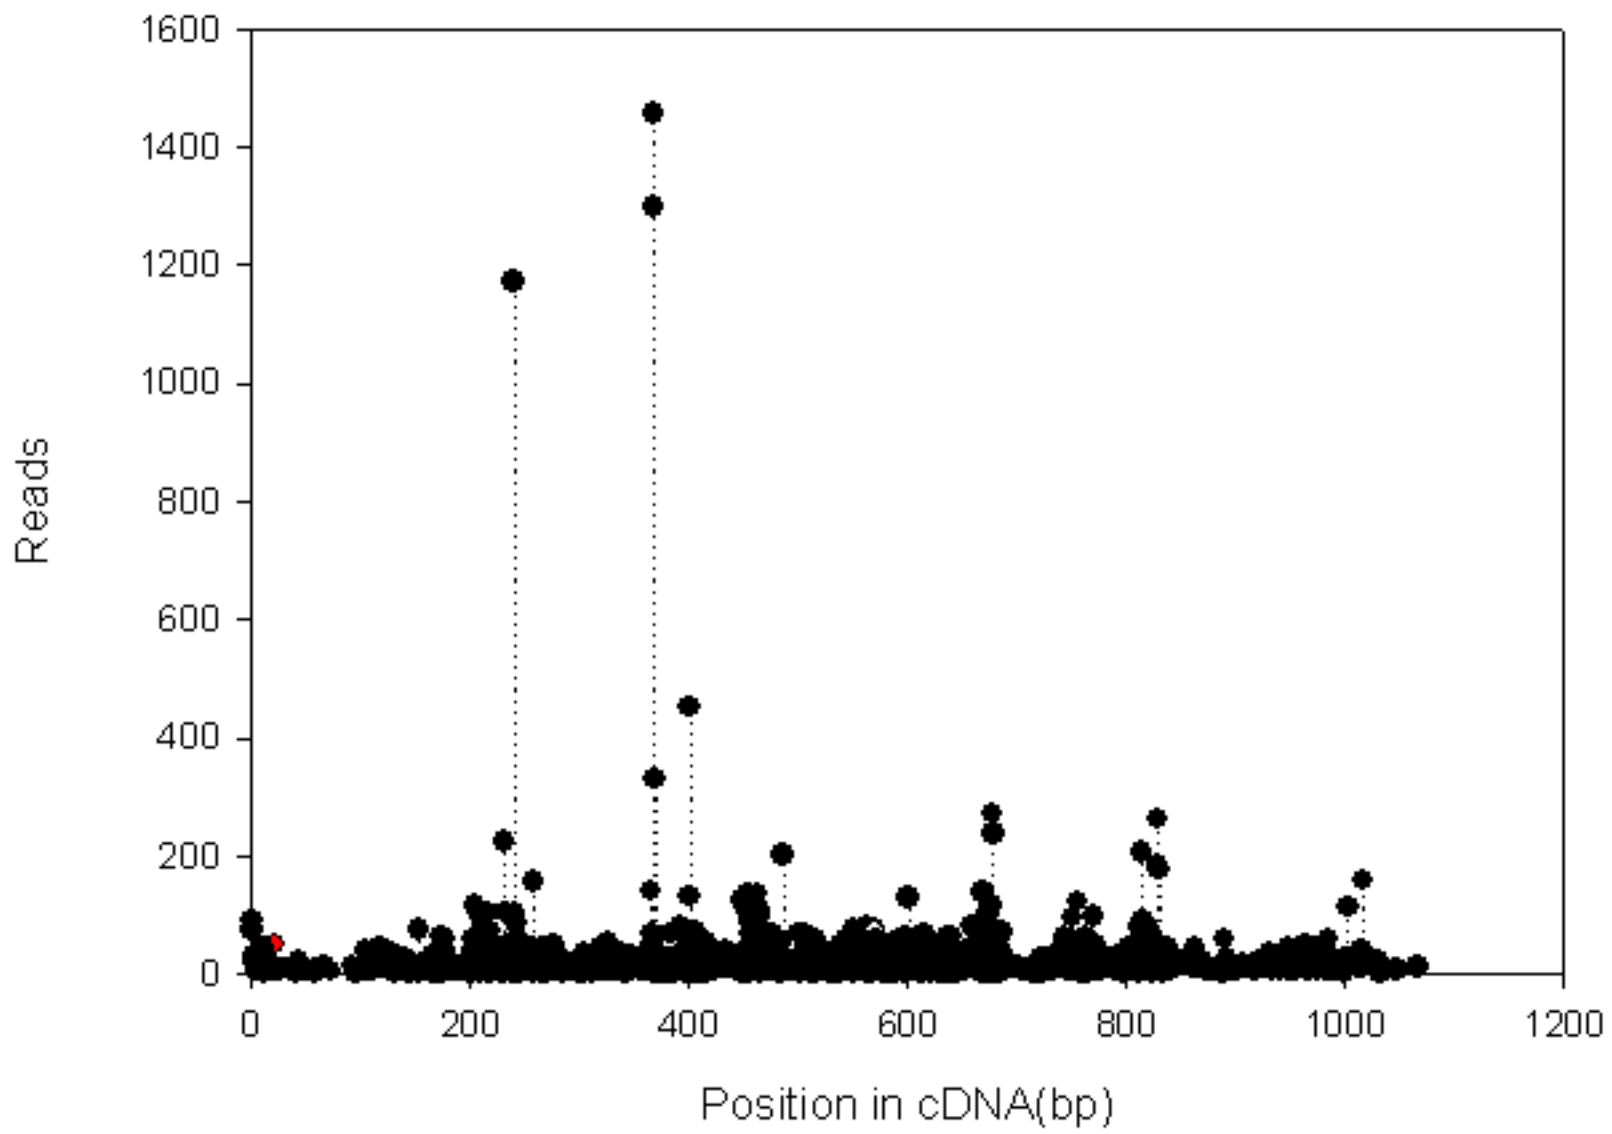

```

5' CUCGUGC-CACUCUCGUUUGUUAAGGA 3'      Cs8g17370.1
   :   :   :   :   :   :   :   :   :
3' ---CACGAGUGAGAGAAGACAGUU--- 5'      Csi-miR156a.1
  
```

Csi-miR156a.1, target=Orange1.1t02265.1 gene=Orange1.1t02265  
 Category:1  
 Score=1  
 Cleavage Site=982

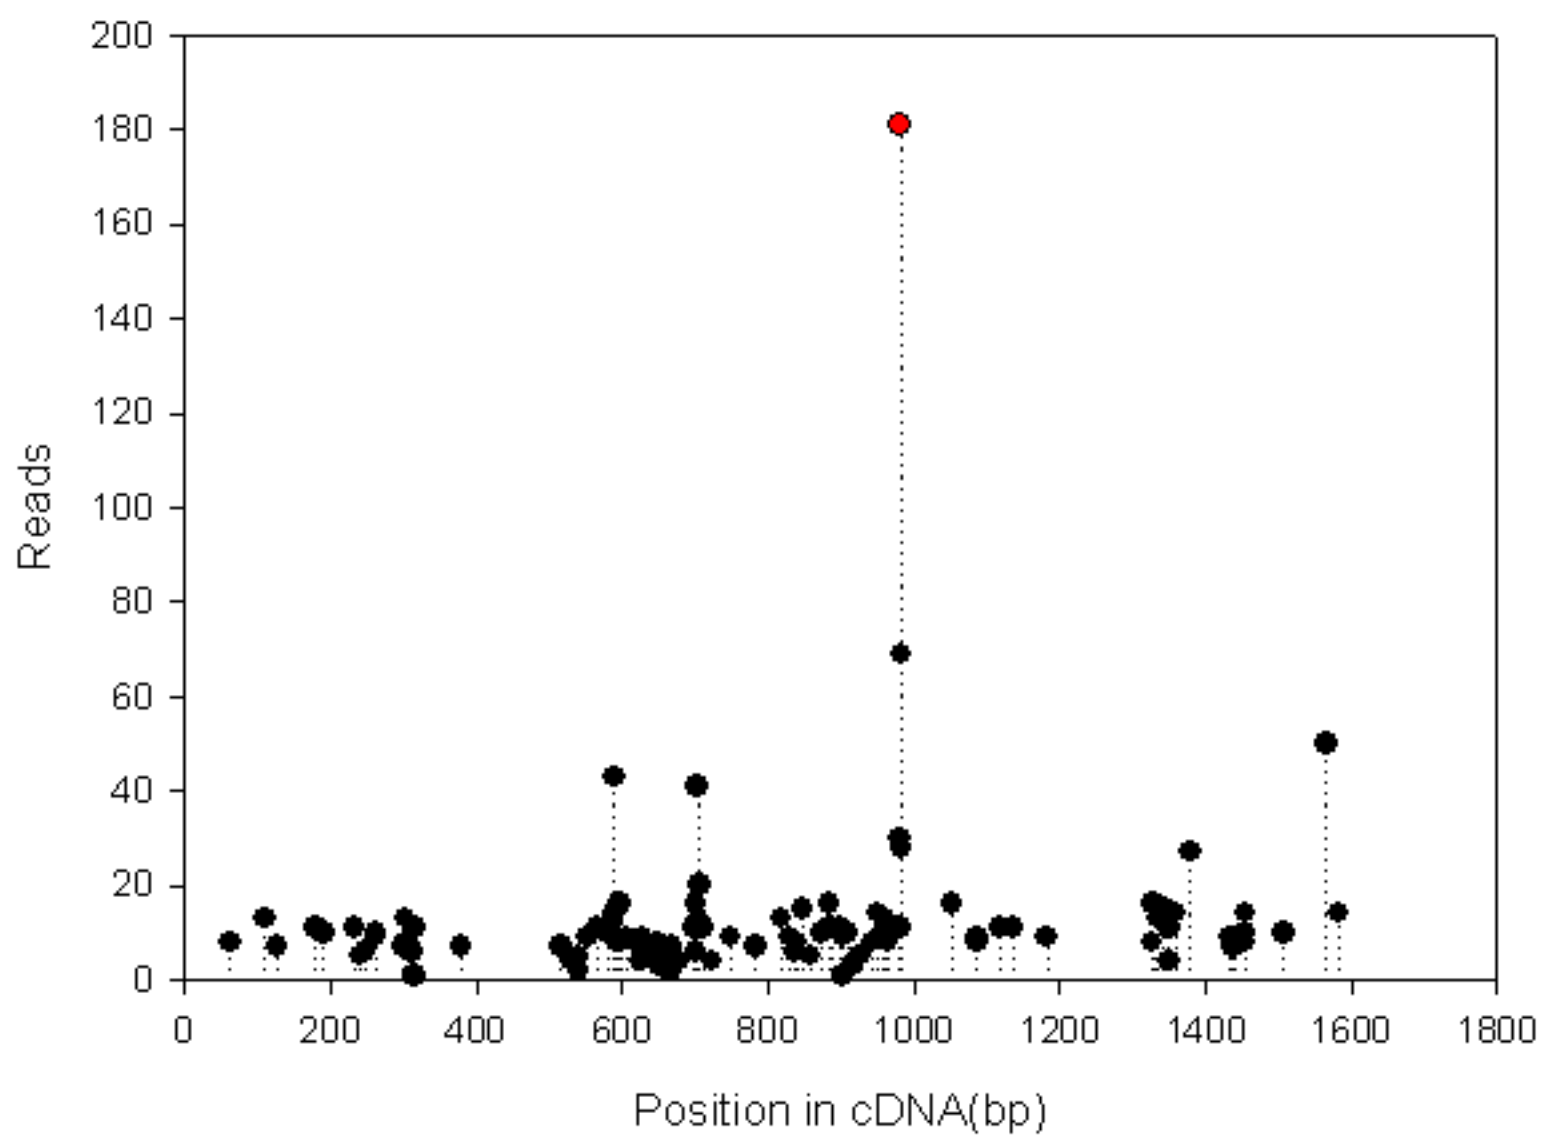

5' CUGUGCUCUCUCUCUUCUGUCAAAUC 3'  
 ::::: ::::::::::::::::::::  
 3' --CACGAGUGAGAGAAGACAGUU--- 5'

Orange1.1t02265.1  
 Csi-miR156a.1



Csi-miR156a.2, target=Cs2g05730.1 gene=Cs2g05730  
 Category:1  
 Score=1  
 Cleavage Site=818

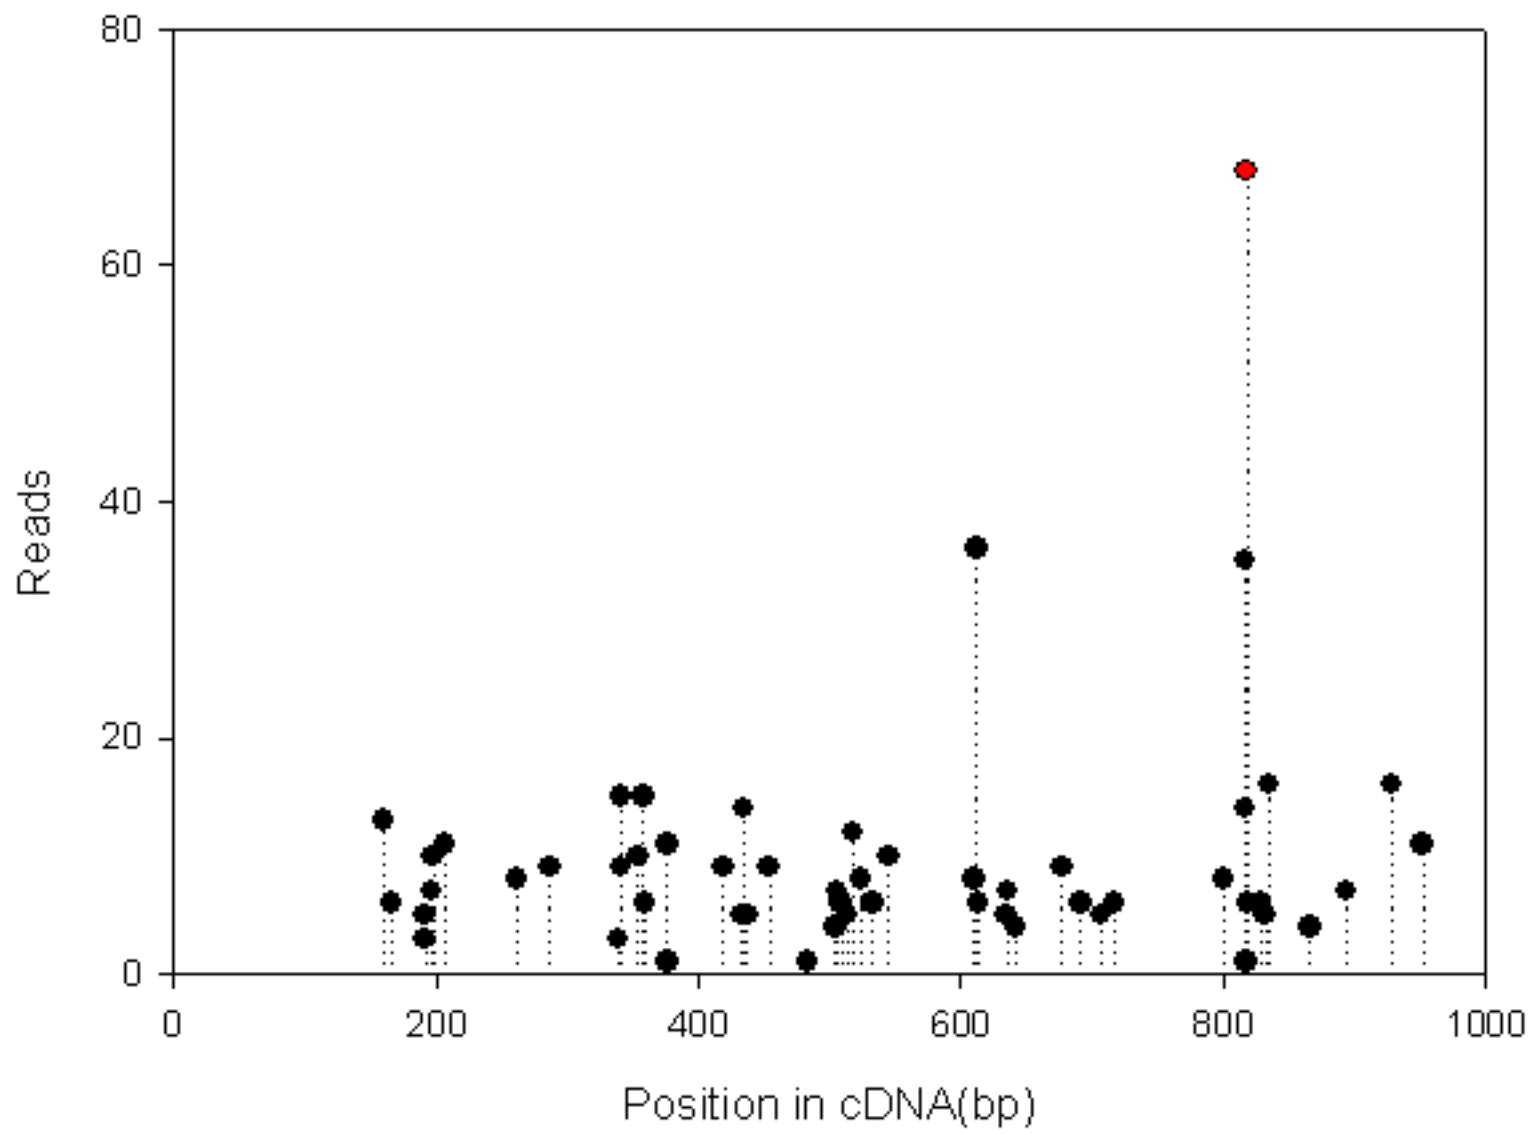

5' CGUGCUCUCUCUCUUCUGUCA AUGCU 3'  
 :::::::::::::::::::::::  
 3' -CACGAGUGAGAGAAGACAGU----- 5'

Cs2g05730.1

Csi-miR156a.2

Csi-miR156a.2, target=Cs2g23550.1 gene=Cs2g23550  
 Category:1  
 Score=2  
 Cleavage Site=934

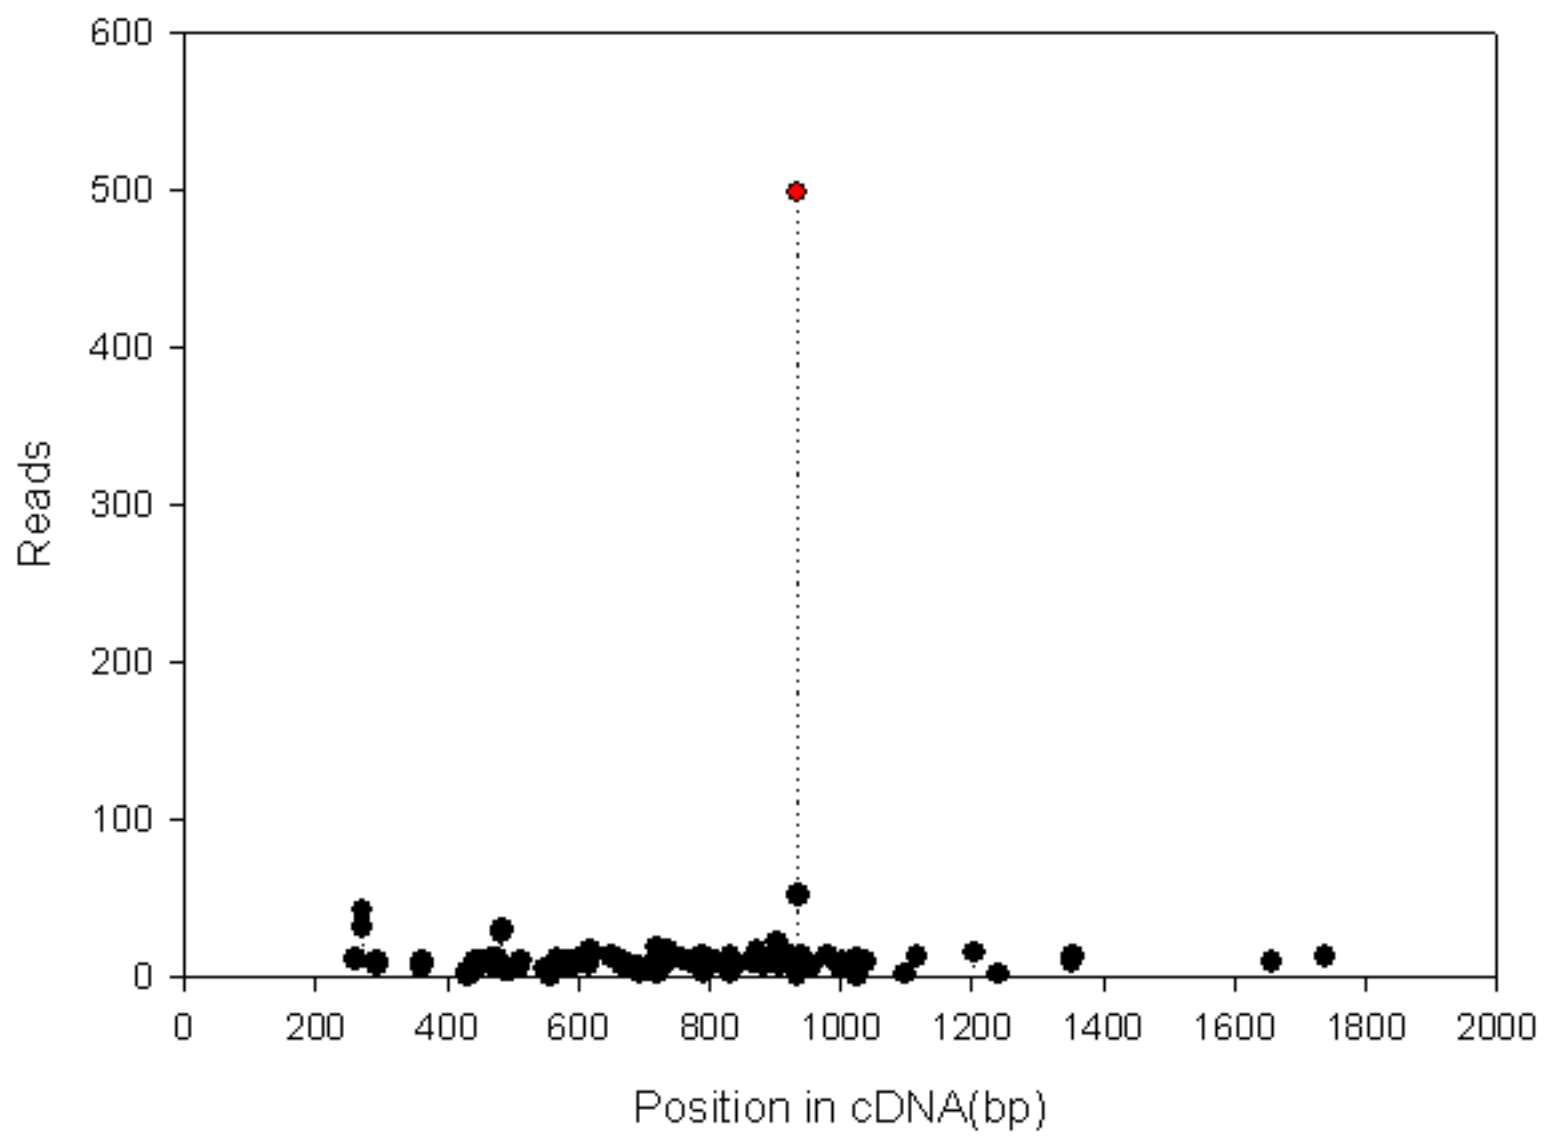

5' CAUGCUCUCUCUCUUCUGUCAUCCUA 3'  
 ::::: :::::::::::::::  
 3' -CACGAGUGAGAGAAGACAGU----- 5'

Cs2g23550.1

Csi-miR156a.2

Csi-miR156a.2, target=Cs7g10830.1 gene=Cs7g10830  
 Category:1  
 Score=1  
 Cleavage Site=1183

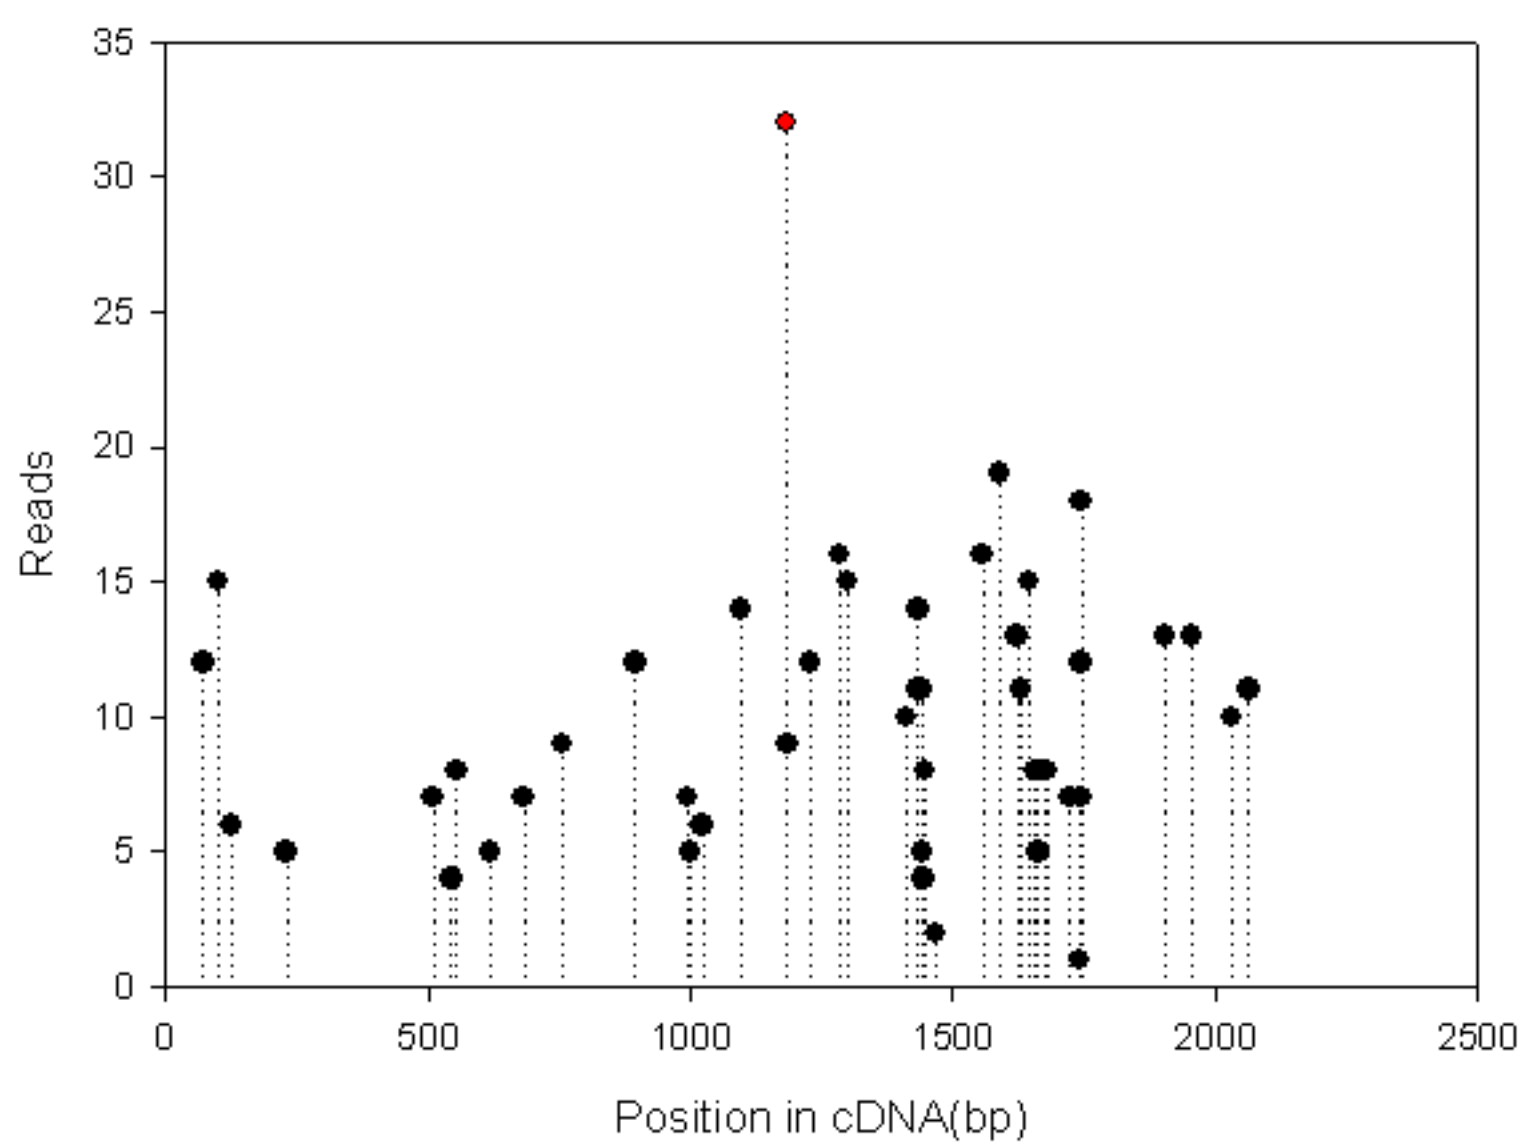

```

5' AGUGCUCUCUCUCUUCUGUCAAAAAC 3'          Cs7g10830.1
   ::::: ::::::::::::::::::::
3' -CACGAGUGAGAGAAGACAGU----- 5'        Csi-miR156a.2

```

Csi-miR156a.2, target=Cs8g17370.1 gene=Cs8g17370  
 Category:3  
 Score=5  
 Cleavage Site=21

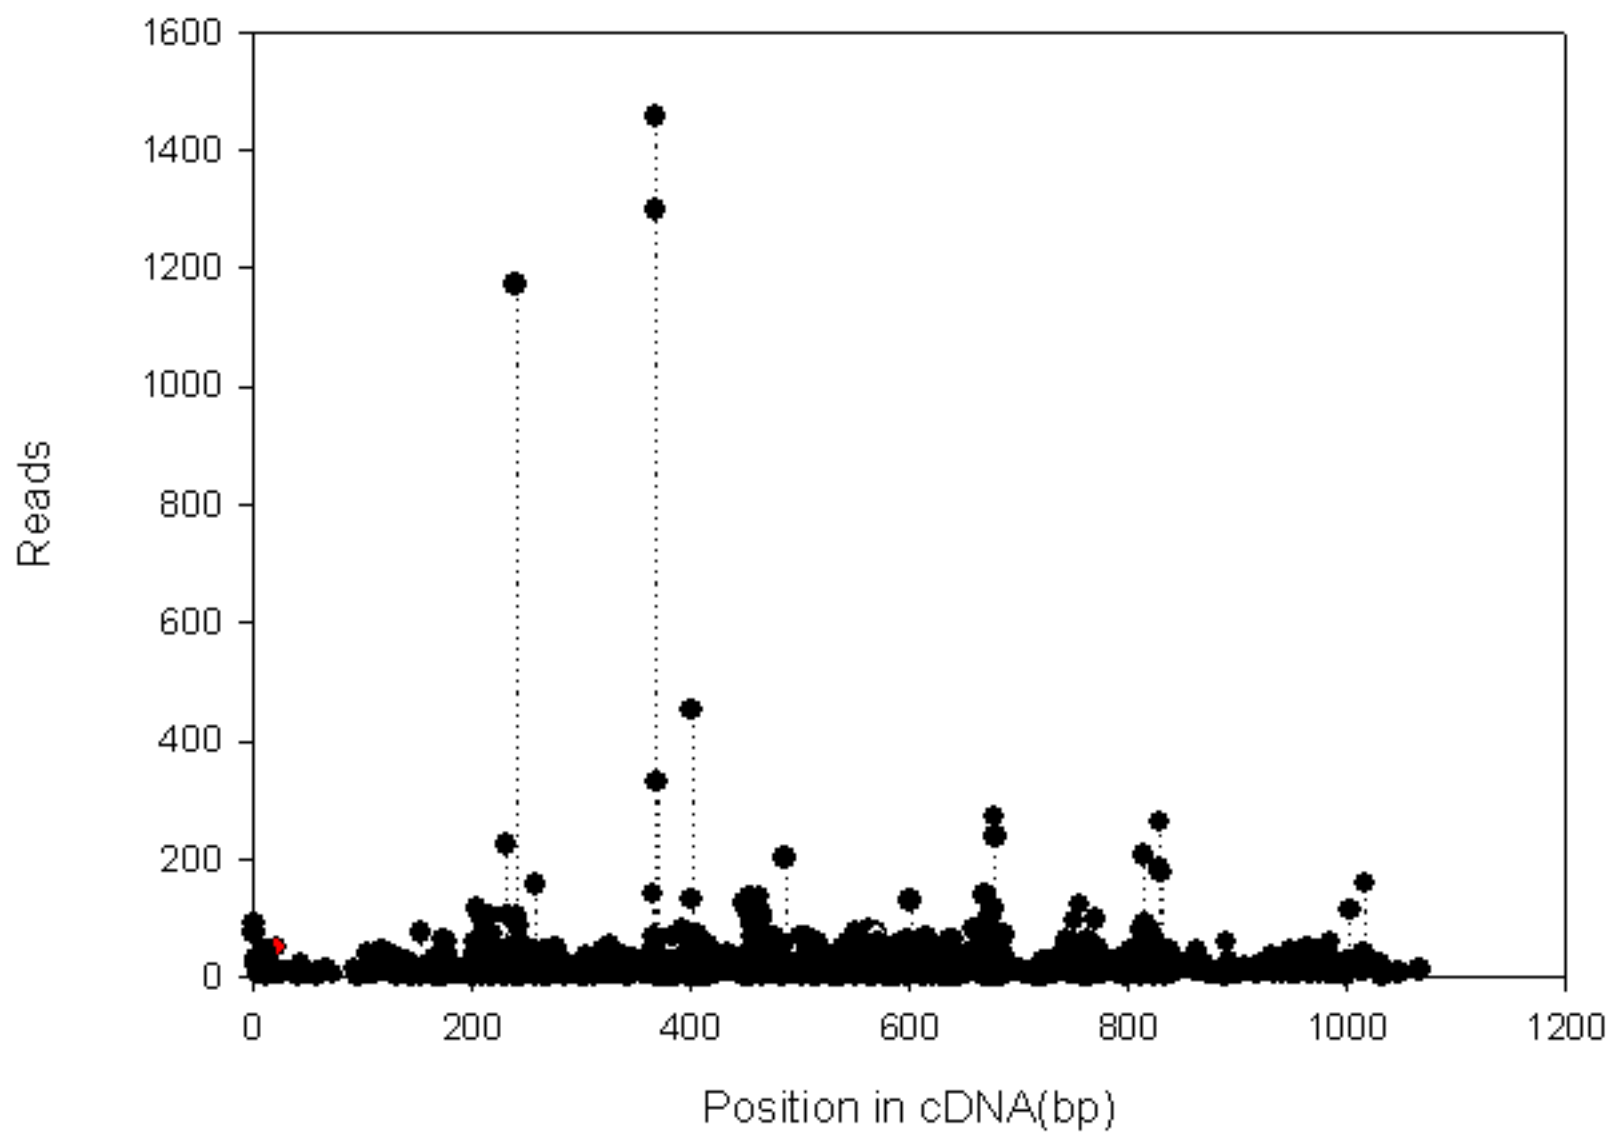

```

5' CUCGUGC-CACUCUCGUUUGUUAAGGA 3'      Cs8g17370.1
   :   : :   :   :   :   :   :   :
3' ---CACGAGUGAGAGAAGACAGU---- 5'      Csi-miR156a.2

```

Csi-miR156a.2, target=Orange1.1t02265.1 gene=Orange1.1t02265  
 Category:1  
 Score=1  
 Cleavage Site=982

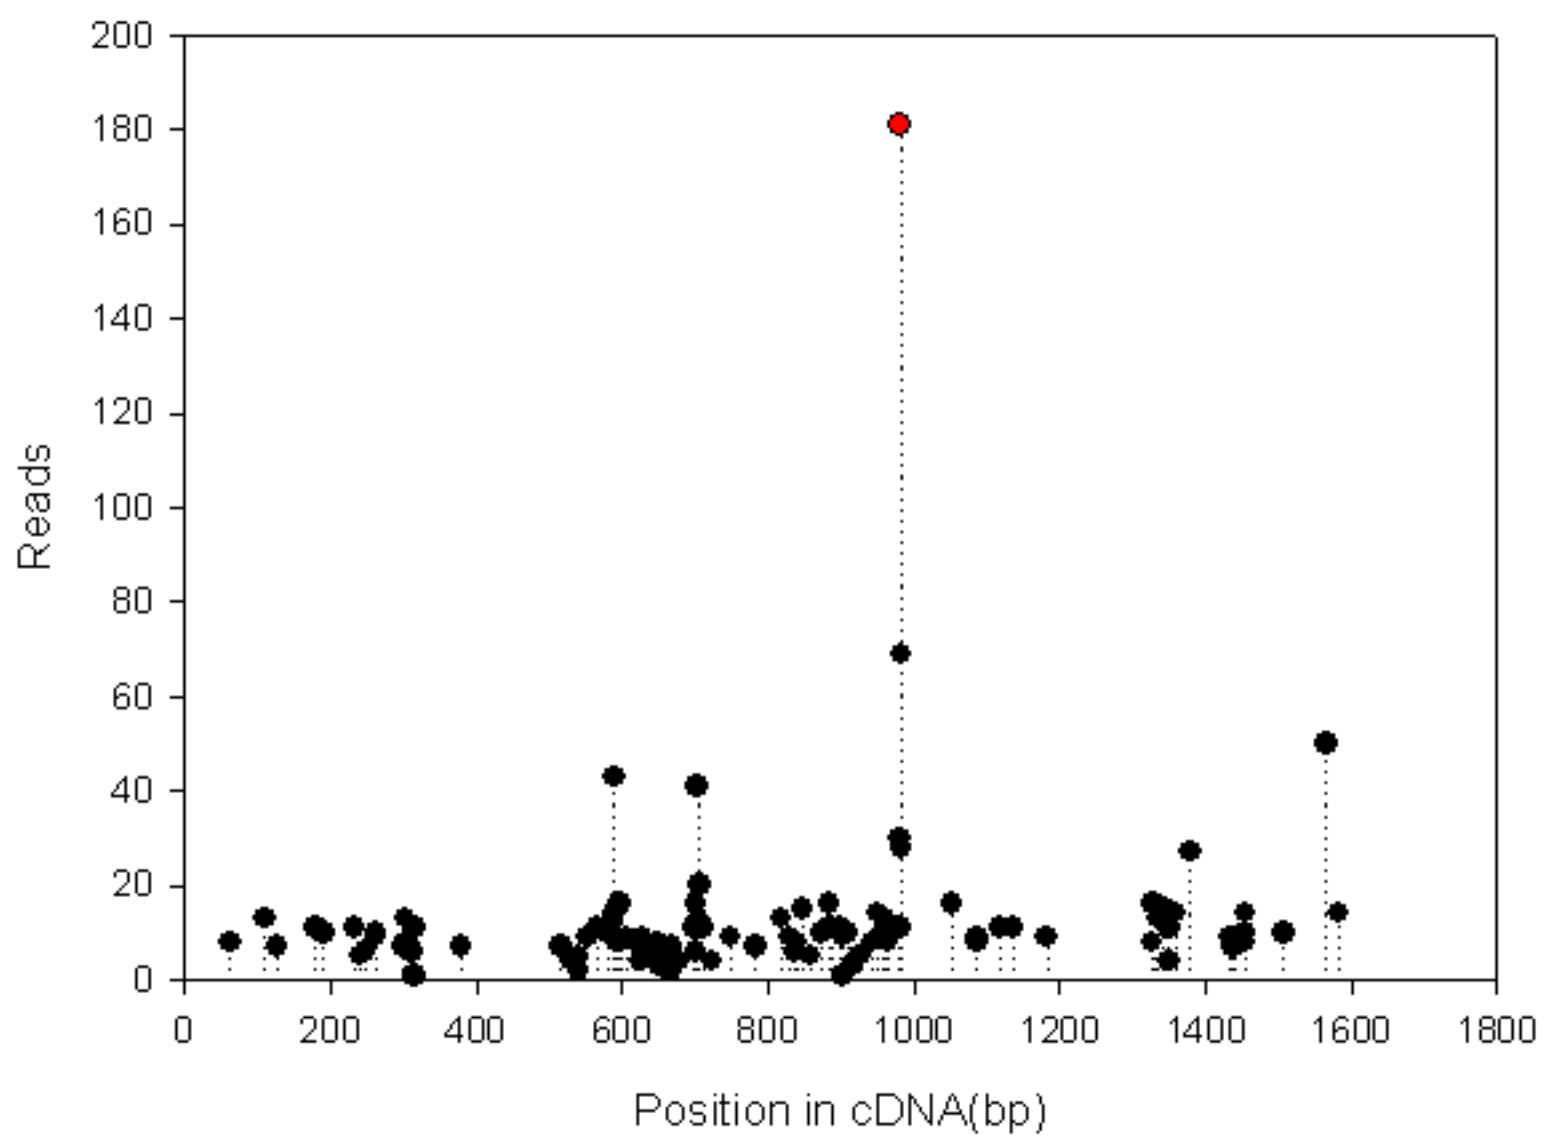

|                                            |                   |
|--------------------------------------------|-------------------|
| 5' CUGUGCUCUCUCUCUUCUGUCAAAUC 3'           | Orange1.1t02265.1 |
| :::          :::          :::          ::: |                   |
| 3' --CACGAGUGAGAGAAGACAGU---- 5'           | Csi-miR156a.2     |

Csi-miR156b.1, target=Cs2g05730.1 gene=Cs2g05730  
 Category:1  
 Score=2  
 Cleavage Site=818



5' CGUGCUCUCUCUCUUCUGUCA AUGCU 3'  
 ::::: :::::::::::::::  
 3' -CACGAGUGAGAGAAGACAGUC---- 5'

Cs2g05730.1

Csi-miR156b.1

Csi-miR156b.1, target=Cs2g23550.1 gene=Cs2g23550  
 Category:1  
 Score=3  
 Cleavage Site=934



|    |                            |    |               |
|----|----------------------------|----|---------------|
| 5' | CAUGCUCUCUCUCUUCUGUCAUCCUA | 3' | Cs2g23550.1   |
|    | .....                      |    |               |
| 3' | -CACGAGUGAGAGAAGACAGUC---- | 5' | Csi-miR156b.1 |

Csi-miR156b.1, target=Cs7g10830.1 gene=Cs7g10830  
 Category:1  
 Score=2  
 Cleavage Site=1183



```

5' AGUGCUCUCUCUCUUCUGUCAAAAAC 3'      Cs7g10830.1
   ::::: ::::::::::::::::::::
3' -CACGAGUGAGAGAAGACAGUC----- 5'    Csi-miR156b.1
  
```



Csi-miR156b.1, target=Orange1.1t02265.1 gene=Orange1.1t02265  
 Category:1  
 Score=2  
 Cleavage Site=982

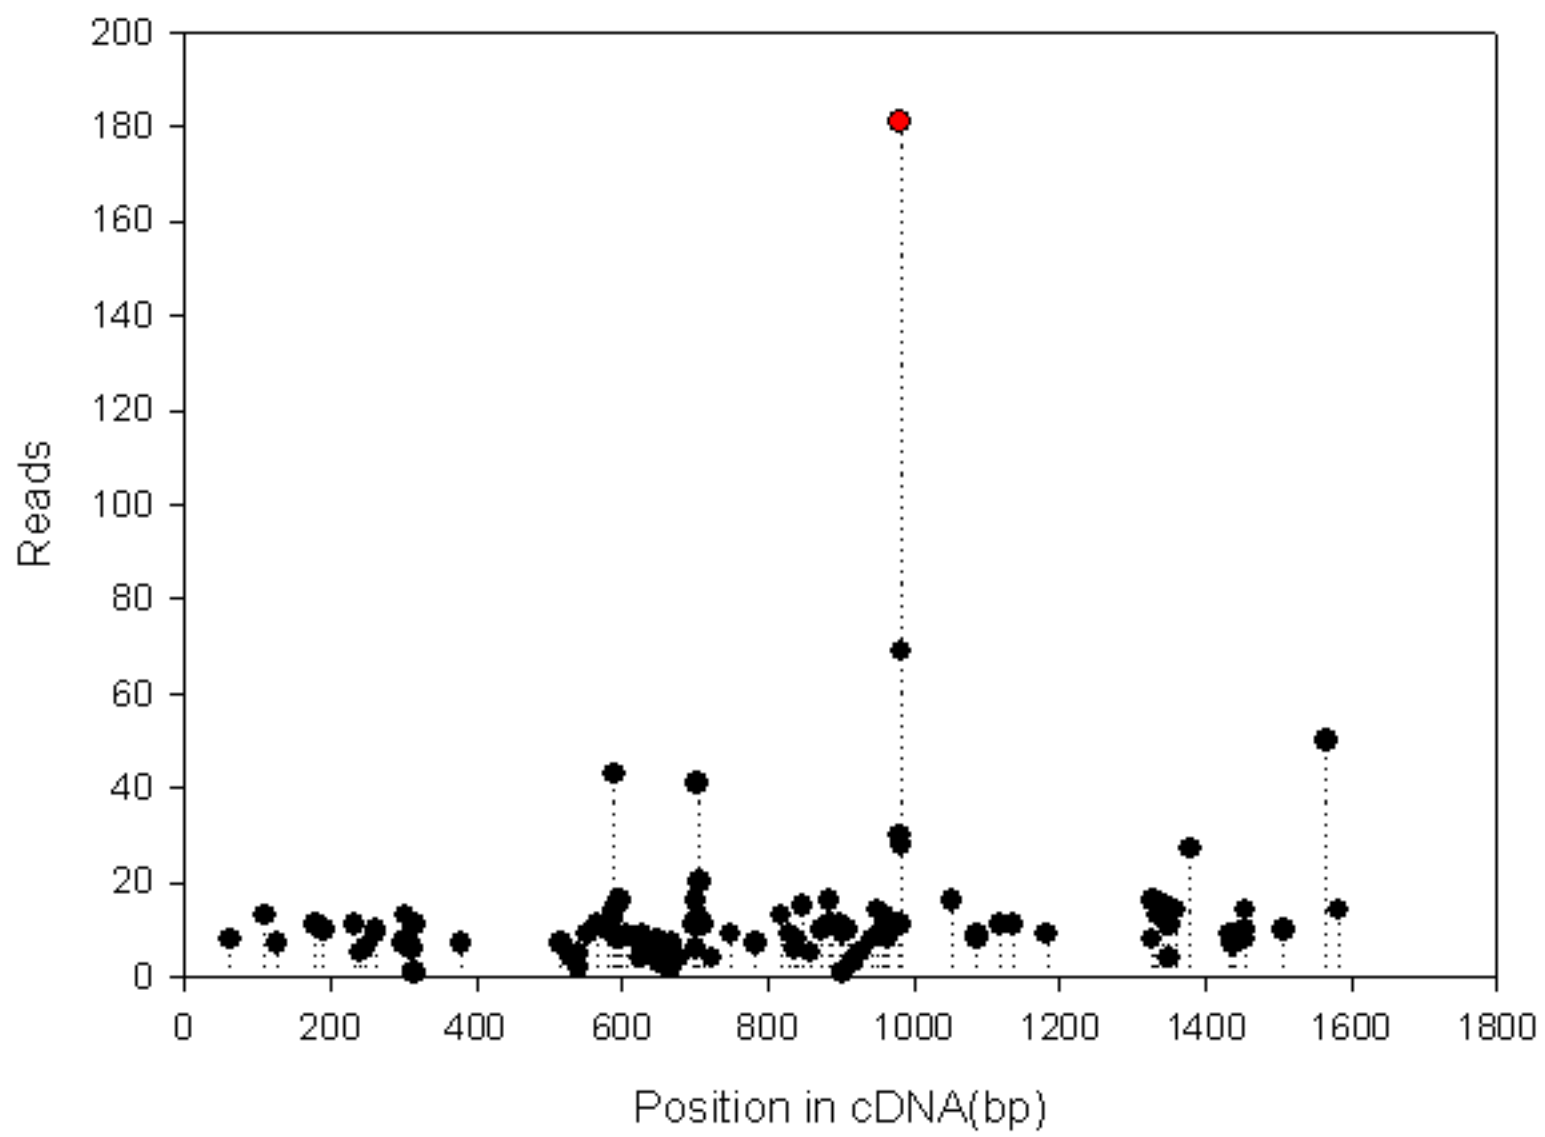

|                                  |                   |
|----------------------------------|-------------------|
| 5' CUGUGCUCUCUCUCUUCUGUCAAAUC 3' | Orange1.1t02265.1 |
| .....                            |                   |
| 3' --CACGAGUGAGAGAAGACAGUC---    | Csi-miR156b.1     |

Csi-miR156c.1, target=Cs2g05730.1 gene=Cs2g05730  
 Category:1  
 Score=2  
 Cleavage Site=818



```

5' CGUGCUCUCUCUCUCUUCUGUCA AUGCU 3'      Cs2g05730.1
   : : : : : : : : : : : : : : : : :
3' ACACGAGUGAGAGAAGACAGU----- 5'      Csi-miR156c.1
  
```

Csi-miR156c.1, target=Cs2g23550.1 gene=Cs2g23550  
 Category:1  
 Score=3  
 Cleavage Site=934

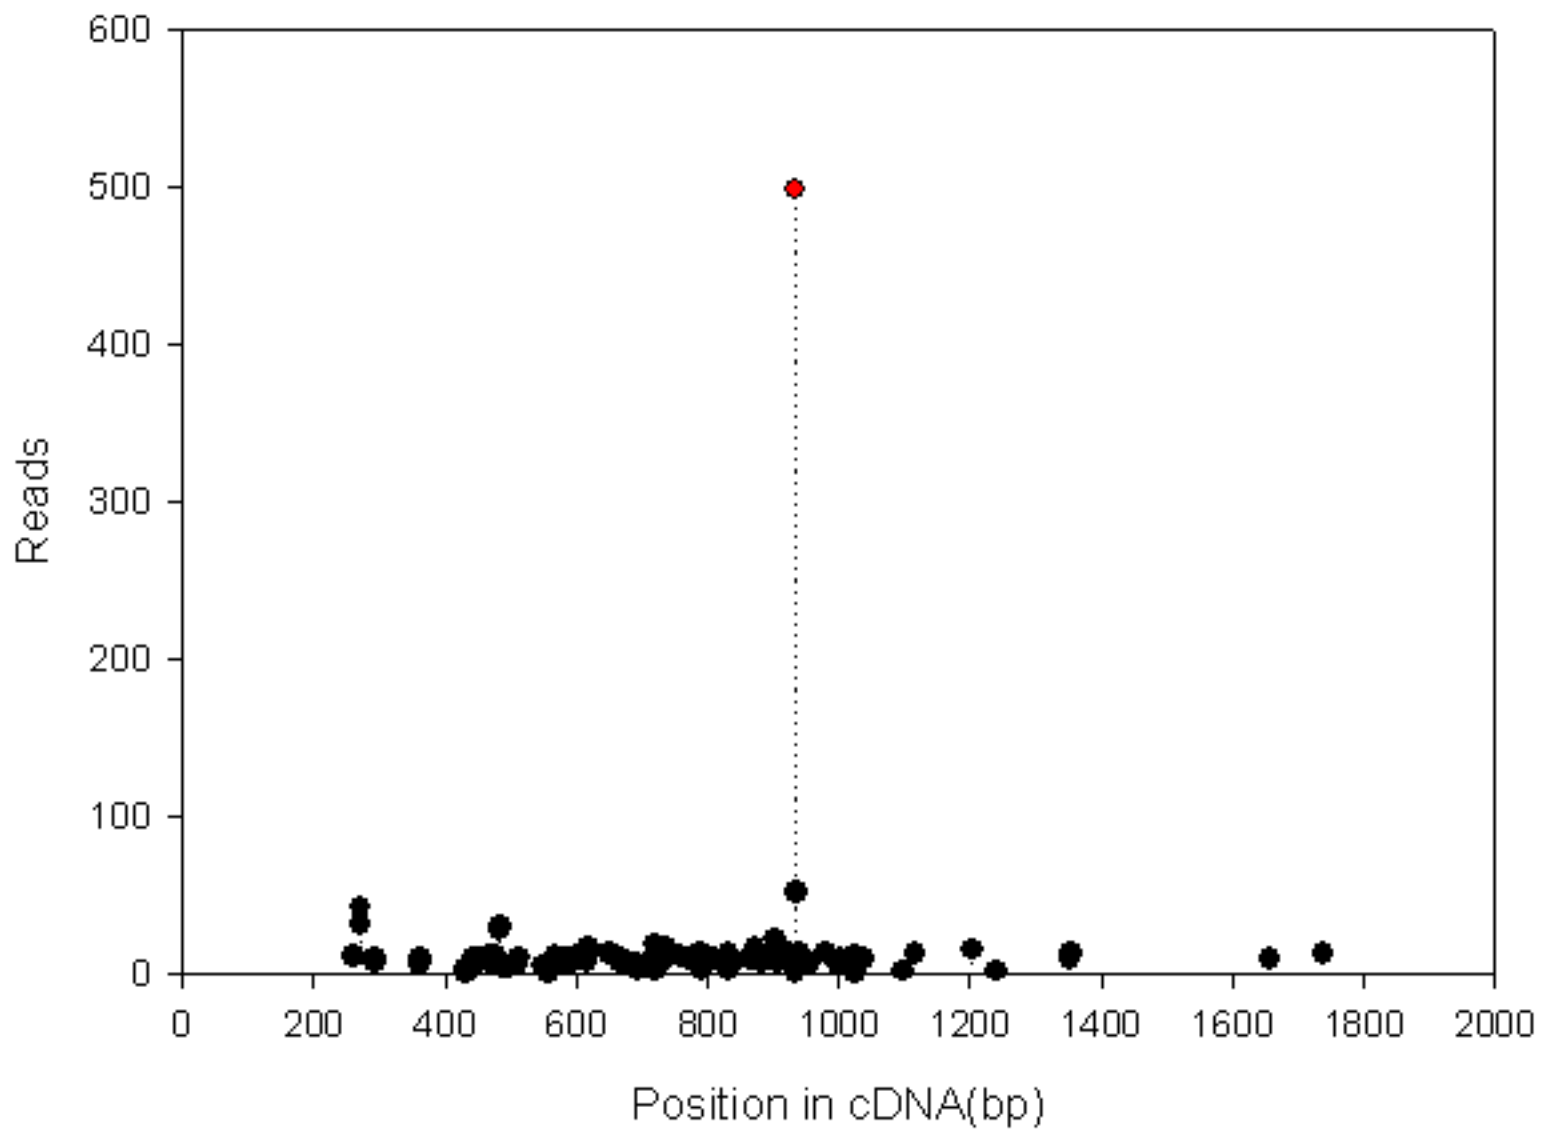

```

5' CAUGCUCUCUCUCUCUUCUGUCAUCCUA 3'          Cs2g23550.1
   ::::: ::::::::::::::::::::
3' ACACGAGUGAGAGAAGACAGU----- 5'          Csi-miR156c.1

```

Csi-miR156c.1, target=Cs7g10830.1 gene=Cs7g10830  
 Category:1  
 Score=2  
 Cleavage Site=1183



```

5' AGUGCUCUCUCUCUCUUCUGUCAAAAAC 3'          Cs7g10830.1
   : : : : : : : : : : : : : : : : : :
3' ACACGAGUGAGAGAAGACAGU----- 5'          Csi-miR156c.1
  
```

Csi-miR156c.1, target=Orange1.1t02265.1 gene=Orange1.1t02265  
 Category:1  
 Score=1  
 Cleavage Site=982



5' CUGUGCUCUCUCUCUUCUGUCAAAUC 3'  
 ::::: :::::::::::::::  
 3' -ACACGAGUGAGAGAAGACAGU---- 5'

Orange1.1t02265.1  
 Csi-miR156c.1

Csi-miR156d, target=Cs2g05730.1 gene=Cs2g05730  
 Category:1  
 Score=2.5  
 Cleavage Site=818



```

5' CGUGCUCUCUCUCUUCUGUCA AUGCU 3'      Cs2g05730.1
   : : : : : : : : : : : : : : : :
3' -CGCGAGAGAUAGAAGACAGU----- 5'      Csi-miR156d
  
```

Csi-miR156d, target=Cs2g23550.1 gene=Cs2g23550  
 Category:1  
 Score=5  
 Cleavage Site=934



```

5' CAUGCUCUCUCUCUUCUGUCAUCCUA 3'      Cs2g23550.1
   .:~::~:~:~:~:~:~:~:~:~:~:~:~:~:~:
3' -CGCGAGAGAUAGAAGACAGU----- 5'      Csi-miR156d
  
```

Csi-miR156d, target=Cs7g10830.1 gene=Cs7g10830  
 Category:1  
 Score=2.5  
 Cleavage Site=1183

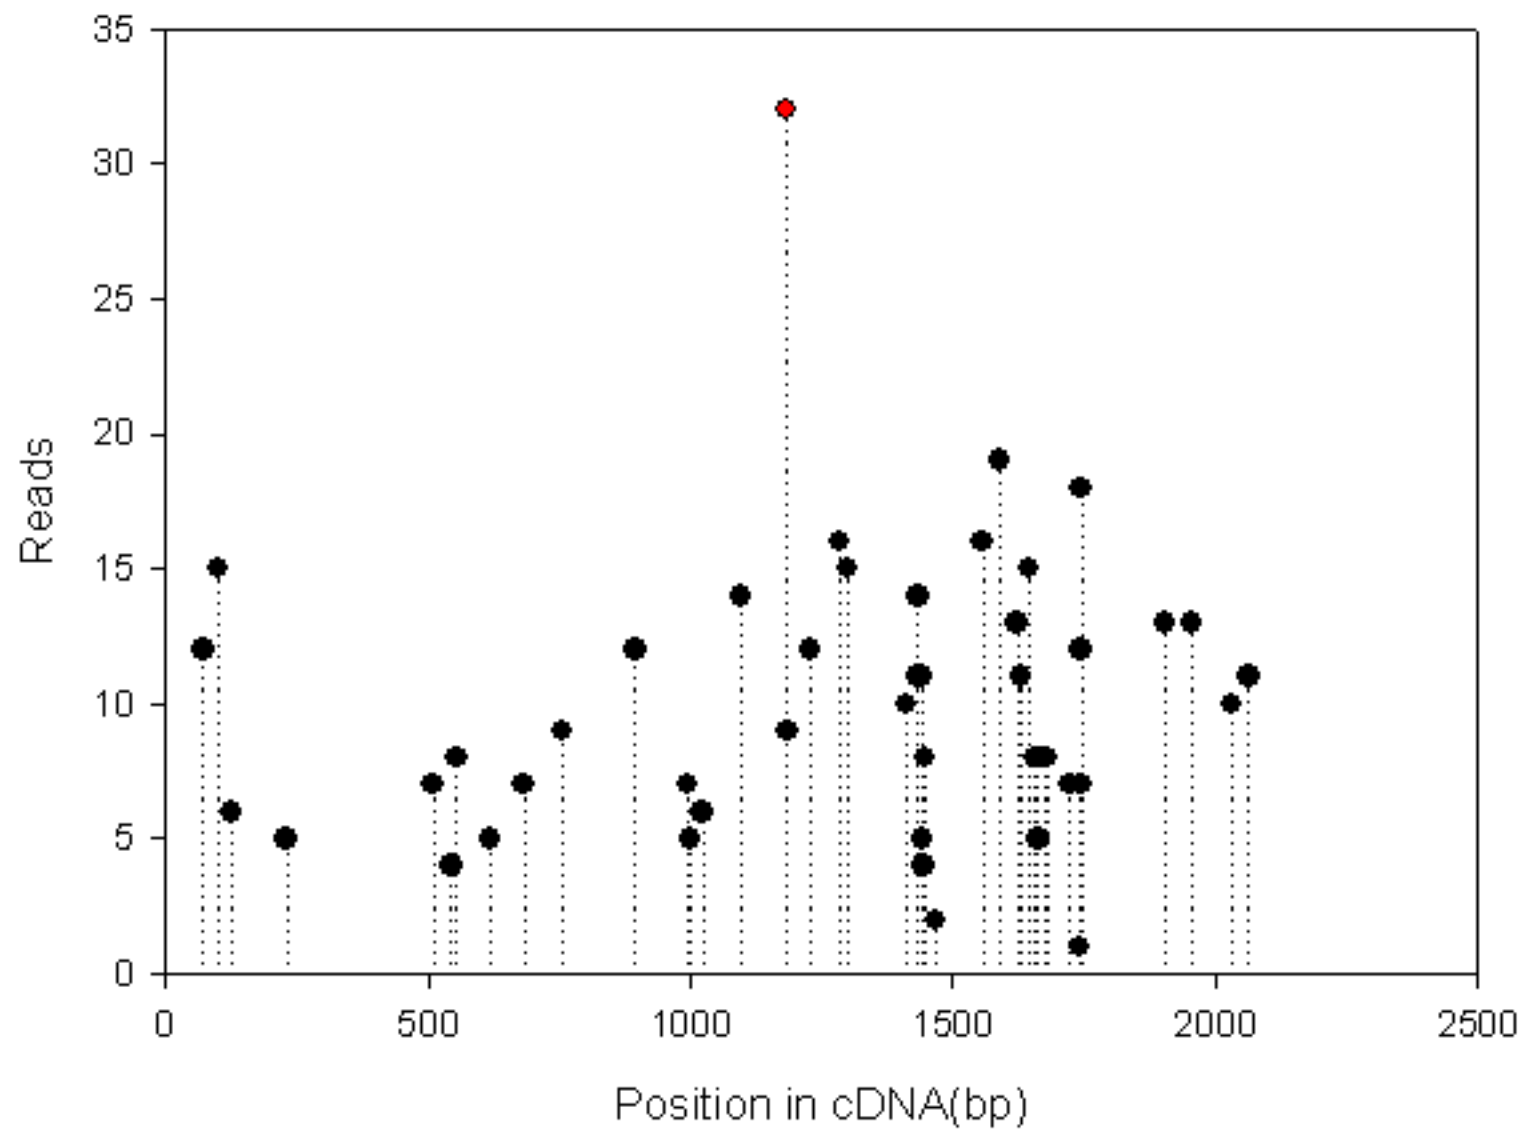

```

5' AGUGCUCUCUCUCUUCUGUCAAAAAC 3'      Cs7g10830.1
   :.:.:.:.:.:.:.:.:.:.:.:.:.:.:.:
3' -CGCGAGAGAUAGAAGACAGU----- 5'      Csi-miR156d

```



Csi-miR156d, target=Orange1.1t02265.1 gene=Orange1.1t02265  
 Category:1  
 Score=5  
 Cleavage Site=982

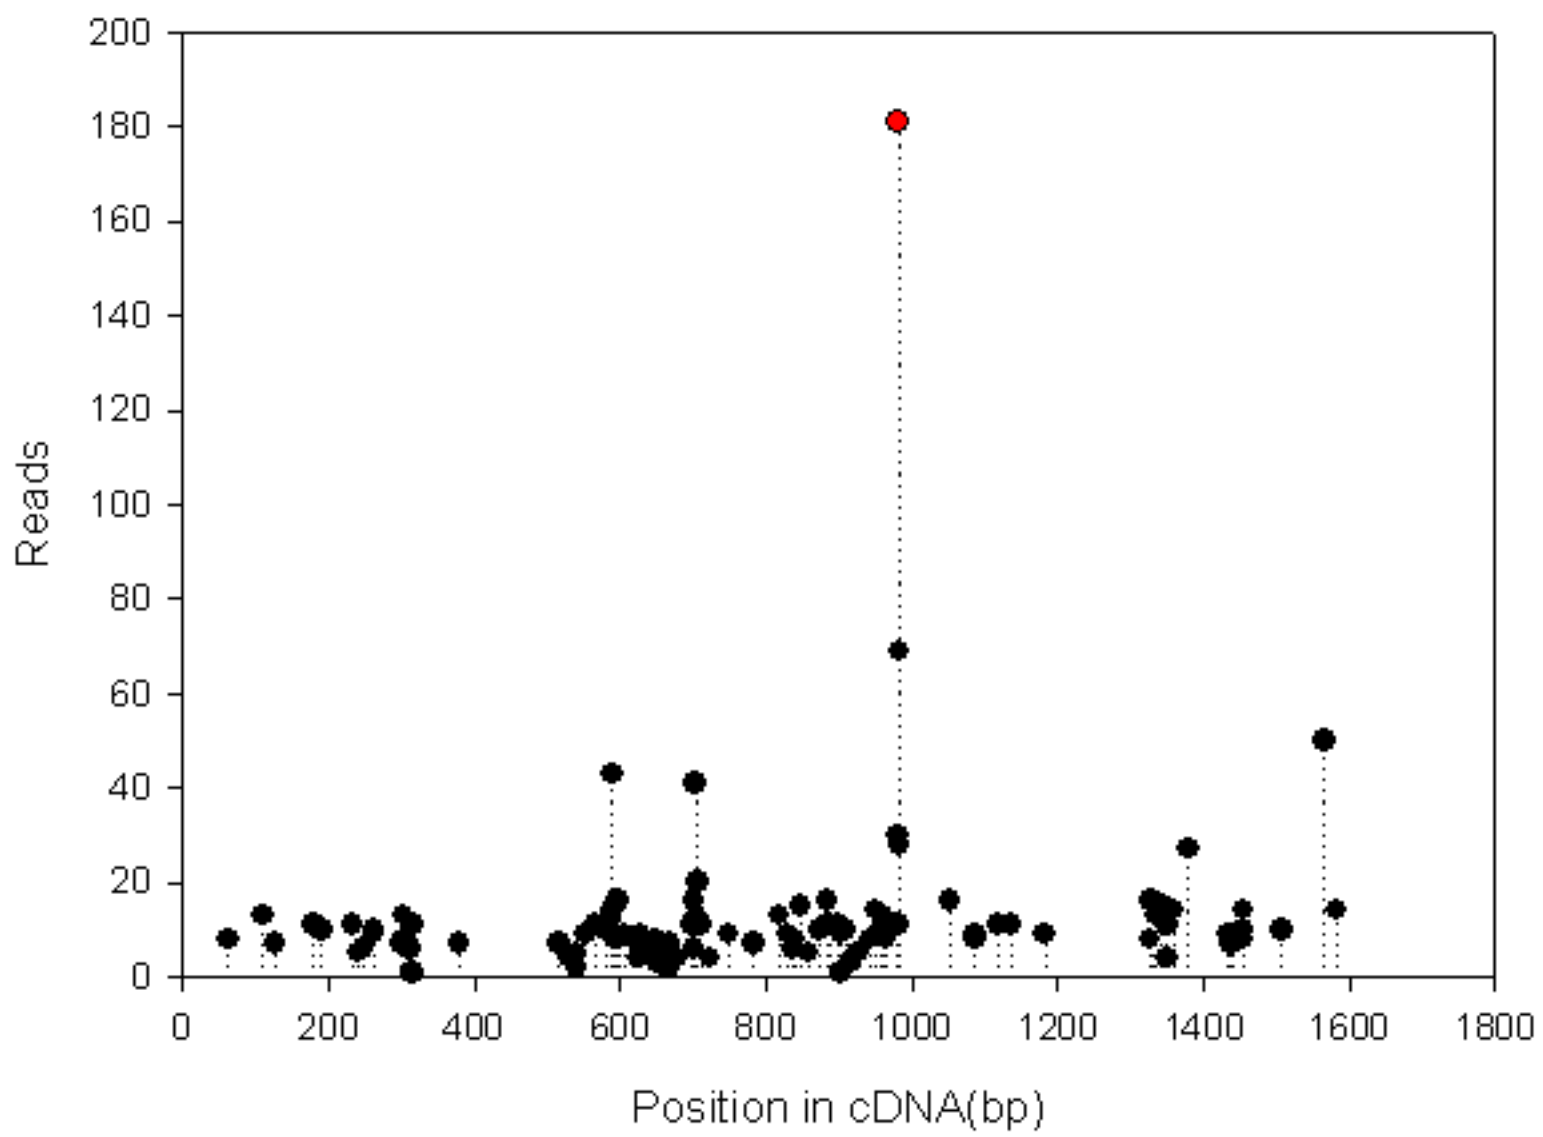

5' CUGUGCUCUCUCUCUUCUGUCAAAUC 3'  
 ::::::::::: :::::::::::  
 3' --CGCGAGAGAUAGAAGACAGU---- 5'

Orange1.1t02265.1  
 Csi-miR156d

Csi-miR156e, target=Cs2g05730.1 gene=Cs2g05730  
 Category:1  
 Score=2.5  
 Cleavage Site=818



```

5' CGUGCUCUCUCUCUUCUGUCAUGCU 3'      Cs2g05730.1
   : : : : : : : : : : : : : : : :
3' -CGCGAGAGAUAGAAGACAGUG---- 5'      Csi-miR156e
  
```

Csi-miR156e, target=Cs2g23550.1 gene=Cs2g23550  
 Category:1  
 Score=4  
 Cleavage Site=934

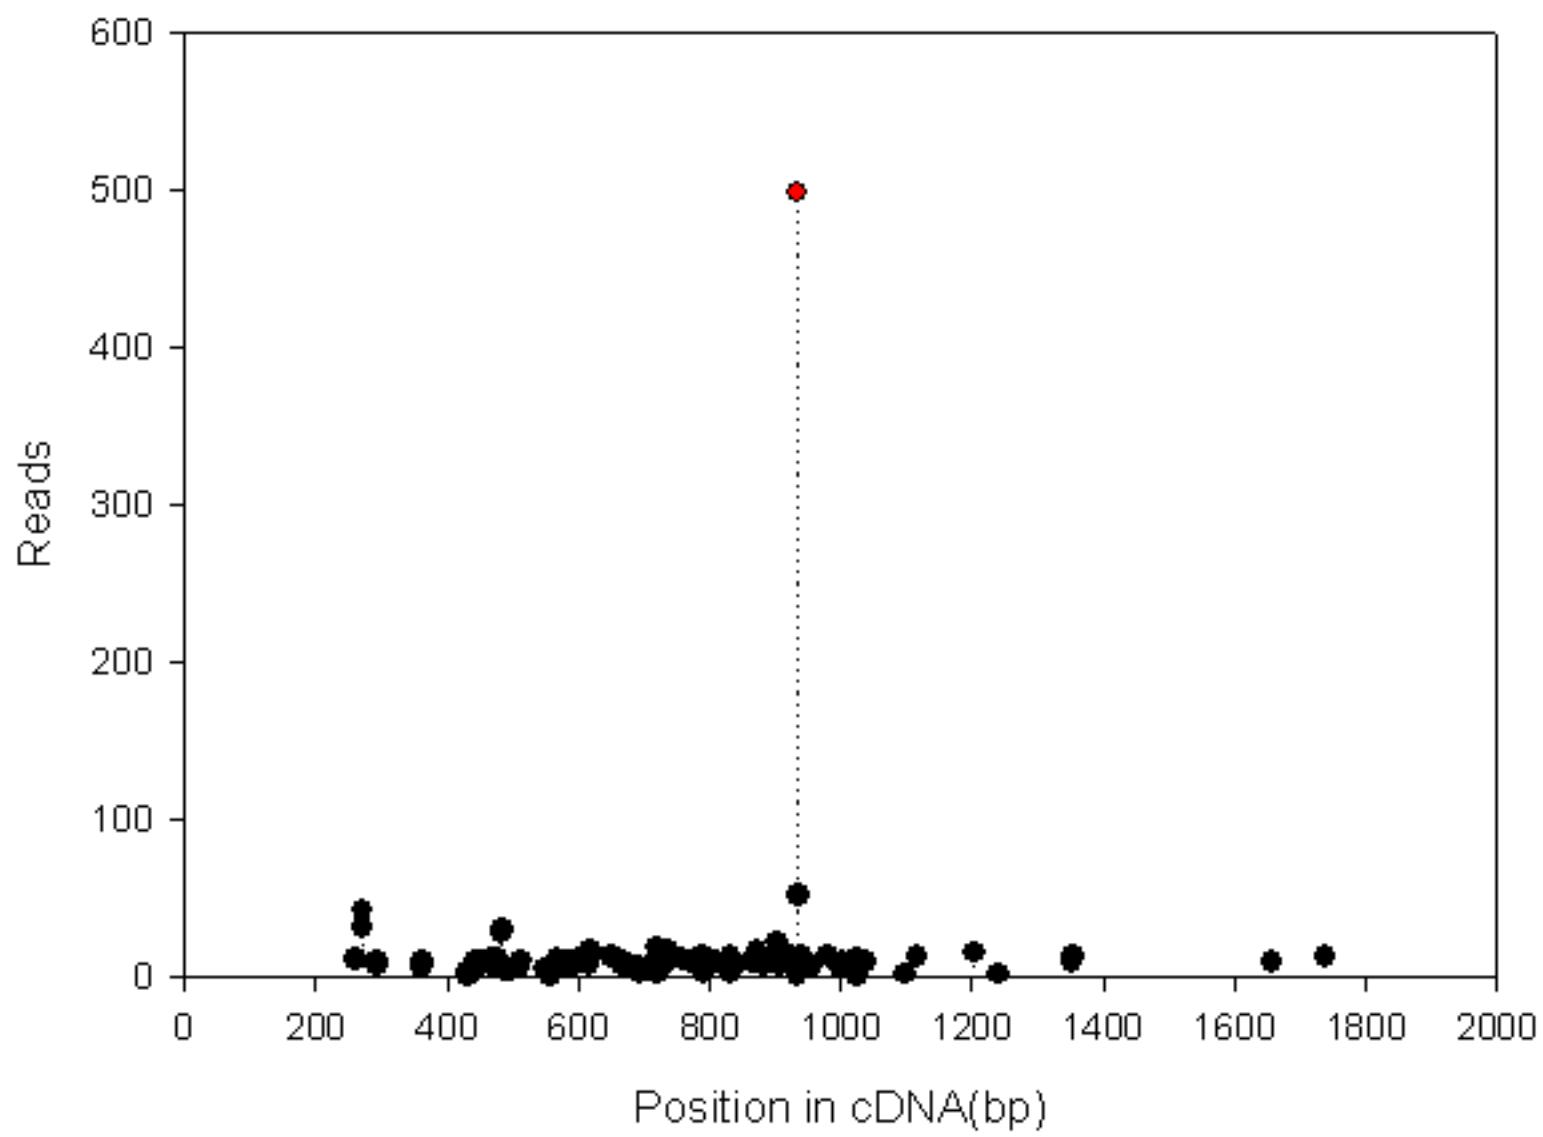

```

5' CAUGCUCUCUCUCUUCUGUCAUCCUA 3'
. . . . . . . . . . . . . . . . .
3' -CGCGAGAGAUAGAAGACAGUG----- 5'

```

Cs2g23550.1  
 Csi-miR156e

Csi-miR156e, target=Cs7g10830.1 gene=Cs7g10830  
 Category:1  
 Score=3.5  
 Cleavage Site=1183



|    |                            |    |             |
|----|----------------------------|----|-------------|
| 5' | AGUGCUCUCUCUCUUCUGUCAAAAAC | 3' | Cs7g10830.1 |
|    | .....                      |    |             |
| 3' | -CGCGAGAGAUAGAAGACAGUG---- | 5' | Csi-miR156e |

Csi-miR156e, target=Orange1.1t02265.1 gene=Orange1.1t02265  
 Category:1  
 Score=3.5  
 Cleavage Site=982



```

5' CUGUGCUCUCUCUCUUCUGUCAAAUC 3'      Orange1.1t02265.1
   :.:.:.:.:.:.:.:.:.:.:.:.:.:.:.:
3' --CGCGAGAGAUAGAAGACAGUG--- 5'      Csi-miR156e
  
```

Csi-miR156f.2, target=Cs2g05730.1 gene=Cs2g05730  
 Category:1  
 Score=1.5  
 Cleavage Site=818



5' CGUGCUCUCUCUCUUCUGUCA AUGCU 3'  
 :::::::::::::::::::::  
 3' -CAUGAGAGAGAGAAGACAGUA---- 5'

Cs2g05730.1  
 Csi-miR156f.2

Csi-miR156f.2, target=Cs2g23550.1 gene=Cs2g23550  
 Category:1  
 Score=1.5  
 Cleavage Site=934



|    |                                 |    |               |
|----|---------------------------------|----|---------------|
| 5' | CAUGCUCUCUCUCUUCUGUCAUCCUA      | 3' | Cs2g23550.1   |
|    | :.:.:.:.:.:.:.:.:.:.:.:.:.:.:.: |    |               |
| 3' | -CAUGAGAGAGAGAAGACAGUA----      | 5' | Csi-miR156f.2 |

Csi-miR156f.2, target=Cs7g10830.1 gene=Cs7g10830  
 Category:1  
 Score=1.5  
 Cleavage Site=1183

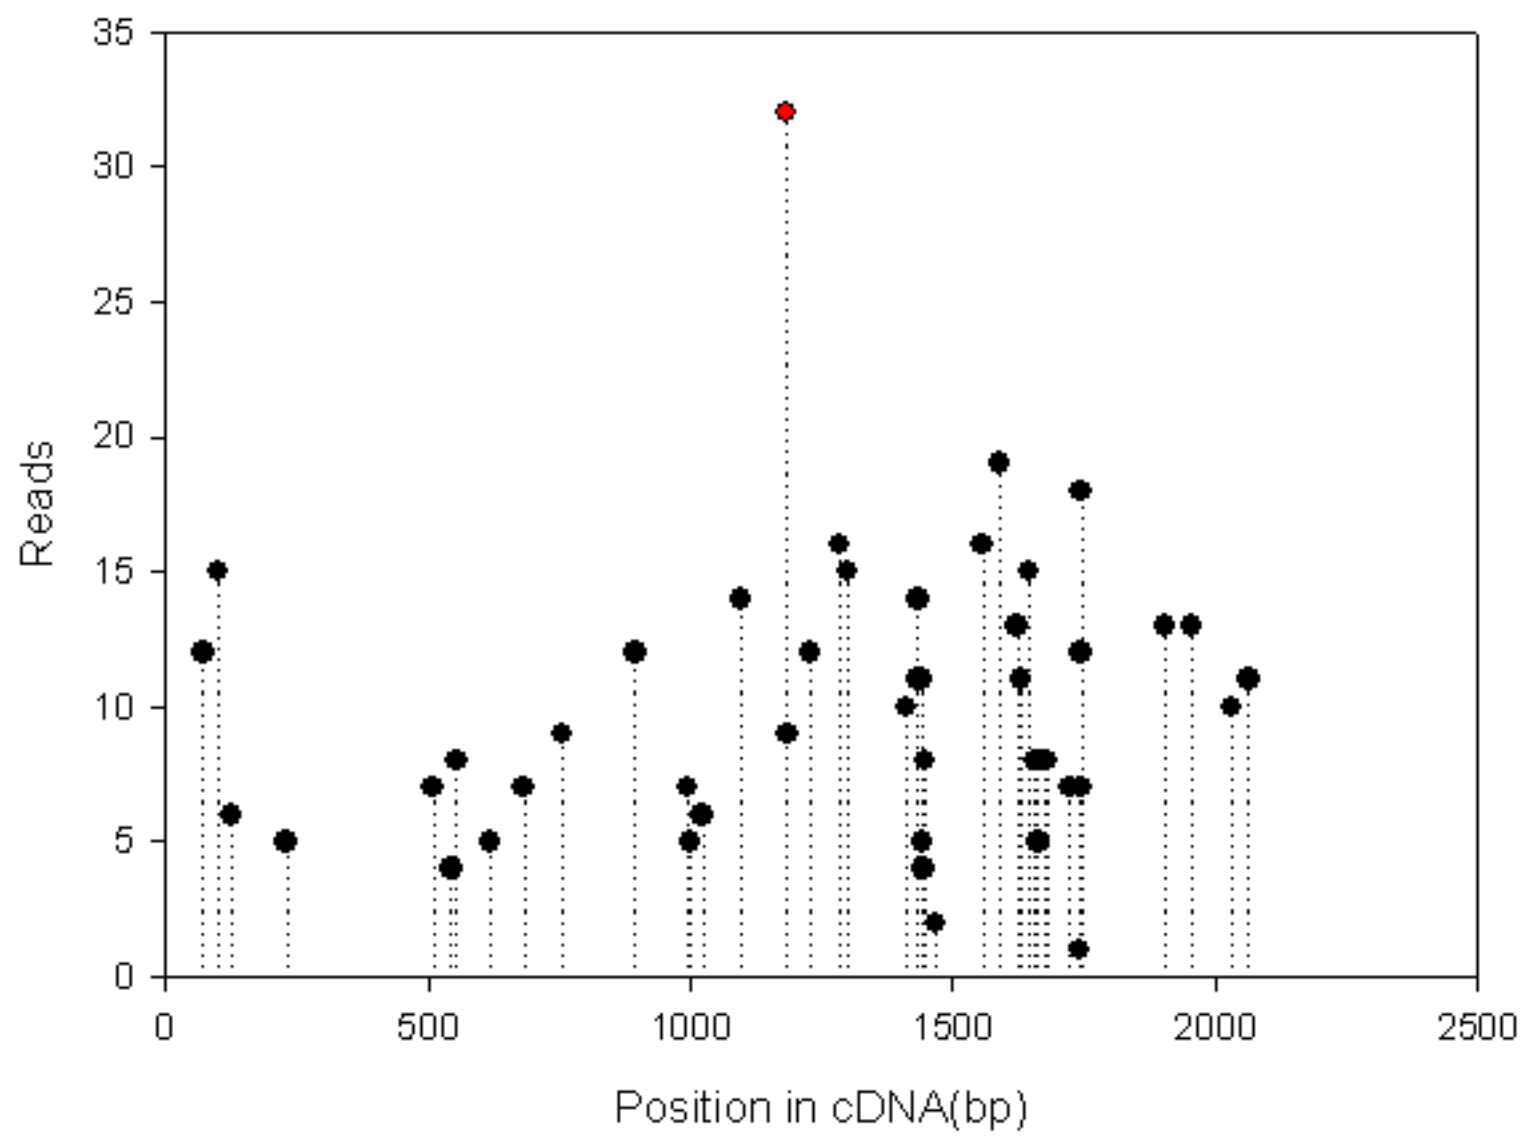

|                                   |               |
|-----------------------------------|---------------|
| 5' AGUGCUCUCUCUCUUCUGUCAAAAAC 3'  | Cs7g10830.1   |
| .....                             |               |
| 3' -CAUGAGAGAGAGAAGACAGUA----- 5' | Csi-miR156f.2 |



Csi-miR156f.2, target=Cs8g19900.1 gene=Cs8g19900  
 Category:2  
 Score=5  
 Cleavage Site=2794

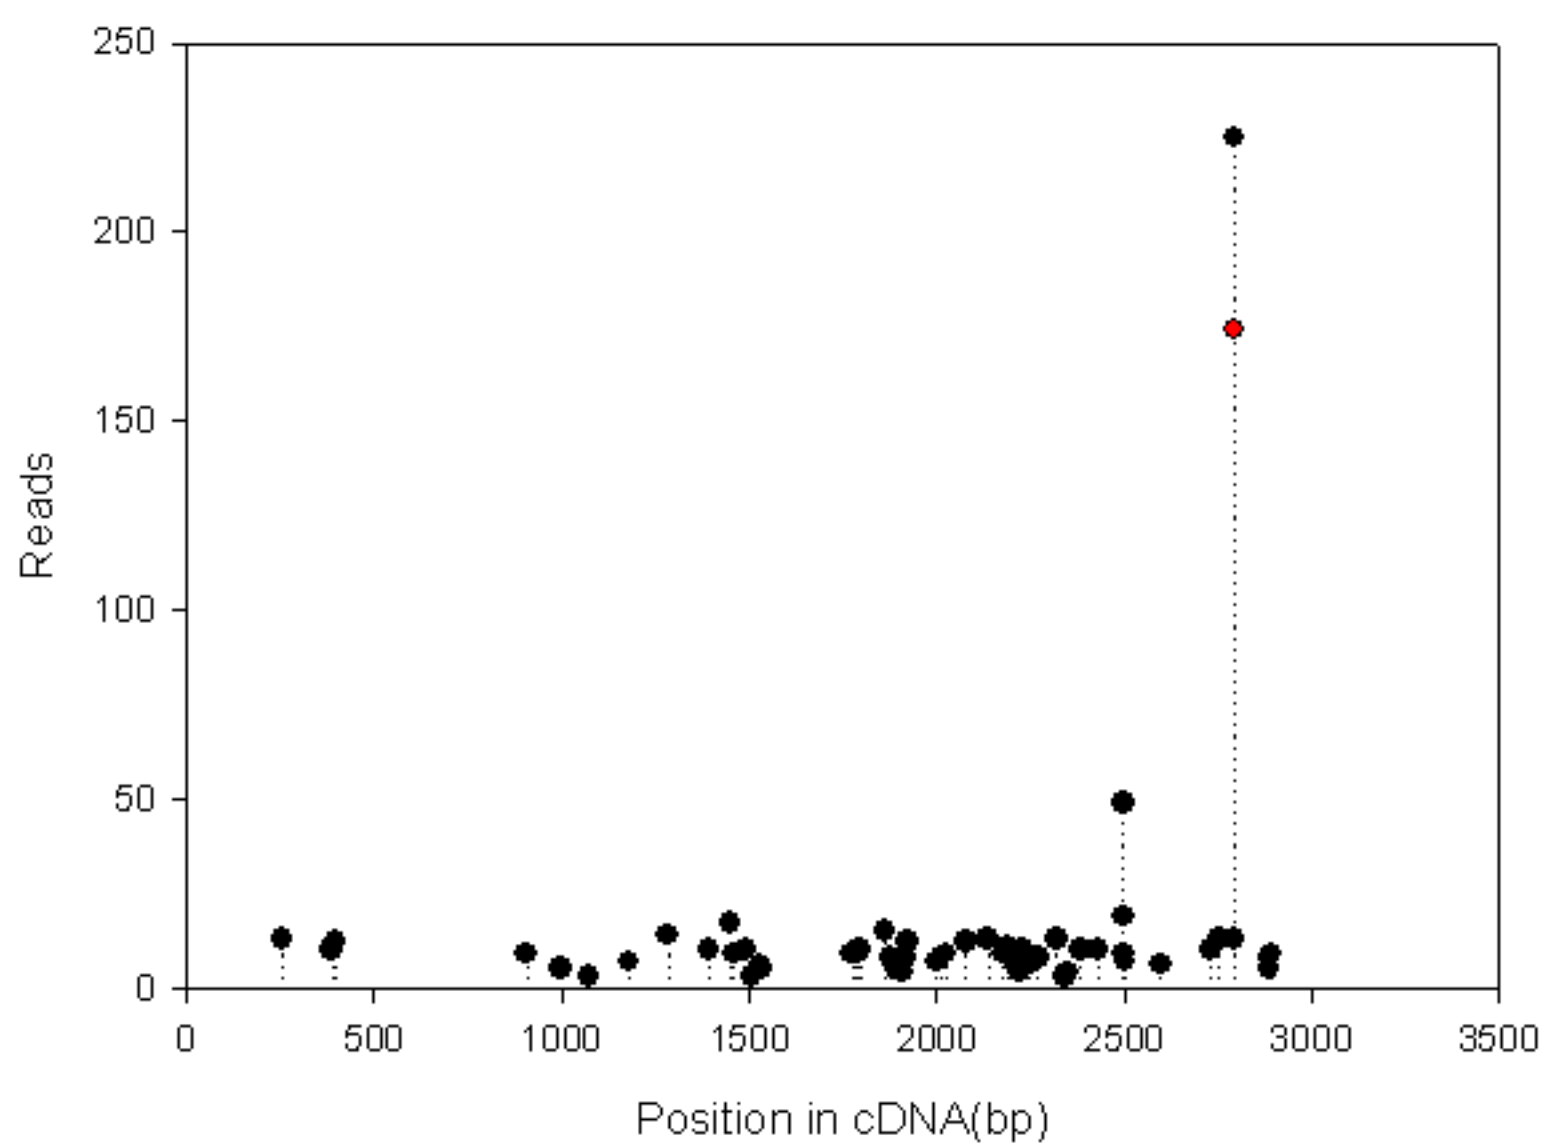

|                                              |               |
|----------------------------------------------|---------------|
| 5' GUG-UCUUUCUCUUUUGACAUUAUGAG 3'            | Cs8g19900.1   |
| :. . :. . :. . :. . :. . :. . :. . :. . :. . |               |
| 3' CAUGAGAGAGAGAAGACAGUA----- 5'             | Csi-miR156f.2 |

Csi-miR156f.2, target=Orange1.1t02265.1 gene=Orange1.1t02265  
 Category:1  
 Score=1.5  
 Cleavage Site=982



5' CUGUGCUCUCUCUCUUCUGUCAAAUC 3'  
 :::::::::::::::::::::  
 3' --CAUGAGAGAGAGAAGACAGUA--- 5'

Orange1.1t02265.1  
 Csi-miR156f.2

Csi-miR156g.1, target=Cs2g05730.1 gene=Cs2g05730  
 Category:1  
 Score=3  
 Cleavage Site=818



5' CGUGCUCUCUCUCUUCUGUCA AUGCU 3'  
 ::::::::::: ::::::::::: :::::::::::  
 3' -CACGAGAGAUAGAAGGCAGUU---- 5'

Cs2g05730.1

Csi-miR156g.1

Csi-miR156g.1, target=Cs2g23550.1 gene=Cs2g23550  
 Category:1  
 Score=5  
 Cleavage Site=934



|    |                            |    |               |
|----|----------------------------|----|---------------|
| 5' | CAUGCUCUCUCUCUUCUGUCAUCCUA | 3' | Cs2g23550.1   |
|    | .....                      |    |               |
| 3' | -CACGAGAGAUAGAAGGCAGUU---- | 5' | Csi-miR156g.1 |

Csi-miR156g.1, target=Cs7g10830.1 gene=Cs7g10830  
 Category:1  
 Score=3  
 Cleavage Site=1183



5' AGUGCUCUCUCUCUUCUGUCAAAAAC 3'  
 :::::::::: ::::::::::  
 3' -CACGAGAGAUAGAAGGCAGUU---- 5'

Cs7g10830.1

Csi-miR156g.1

Csi-miR156g.1, target=Orange1.1t02265.1 gene=Orange1.1t02265  
 Category:1  
 Score=3  
 Cleavage Site=982



```

5' CUGUGCUCUCUCUCUUCUGUCAAAUC 3'
   ::::::::::: :::::::::::
3' --CACGAGAGAUAGAAGGCAGUU--- 5'
  
```

Orange1.1t02265.1

Csi-miR156g.1

Csi-miR156g.2, target=Cs2g05730.1 gene=Cs2g05730  
 Category:1  
 Score=3  
 Cleavage Site=818

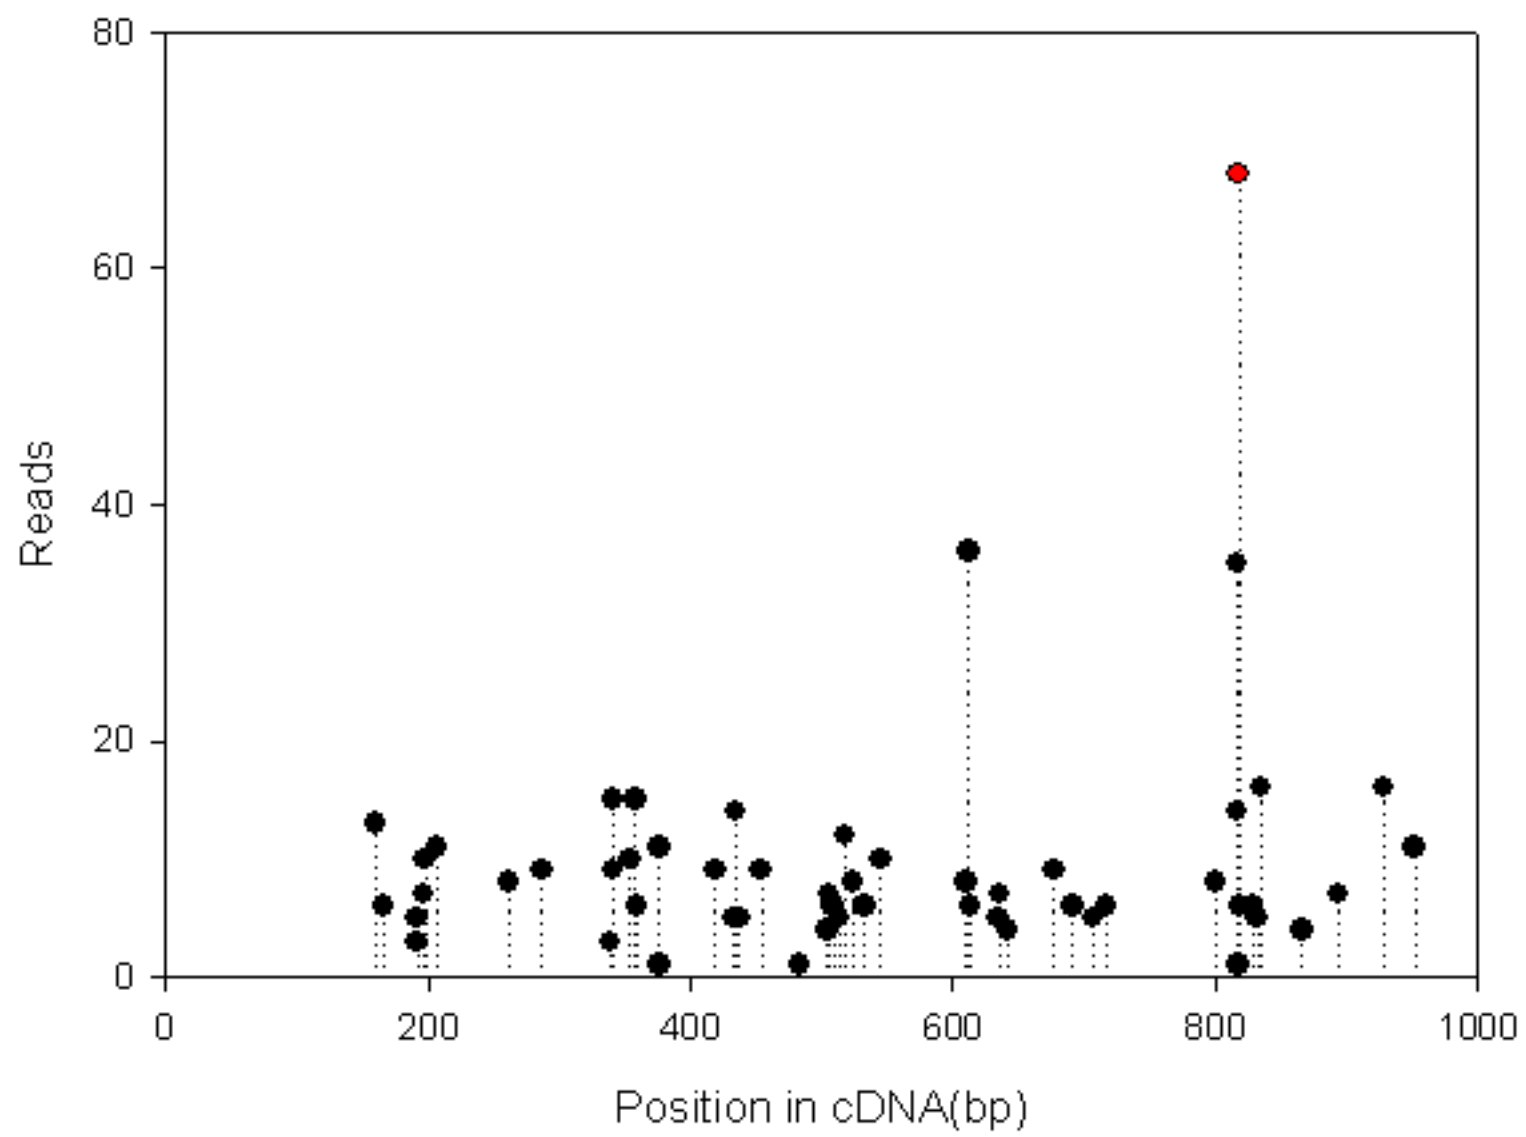

5' CGUGCUCUCUCUCUUCUGUCA AUGCU 3'  
 ::::::::::: ::::::::::: ::  
 3' -CACGAGAGAUAGAAGGCAGU----- 5'

Cs2g05730.1

Csi-miR156g.2

Csi-miR156g.2, target=Cs2g23550.1 gene=Cs2g23550  
Category:1  
Score=4  
Cleavage Site=934



5' CAUGCUCUCUCUCUCUCUGUCAUCCUA 3'

Cs2g23550.1

:::::::::: ::::: .:::::

3' -CACGAGAGAUAGAAGGCAGU----- 5'

Csi-miR156g.2



Csi-miR156g.2, target=Cs7g10830.1 gene=Cs7g10830  
 Category:1  
 Score=3  
 Cleavage Site=1183



```

5' AGUGCUCUCUCUCUUCUGUCAAAAAC 3'      Cs7g10830.1
   ::::::::::: :::::::::::
3' -CACGAGAGAUAGAAGGCAGU----- 5'      Csi-miR156g.2
  
```

Csi-miR156g.2, target=Orange1.1t02265.1 gene=Orange1.1t02265  
 Category:1  
 Score=3  
 Cleavage Site=982

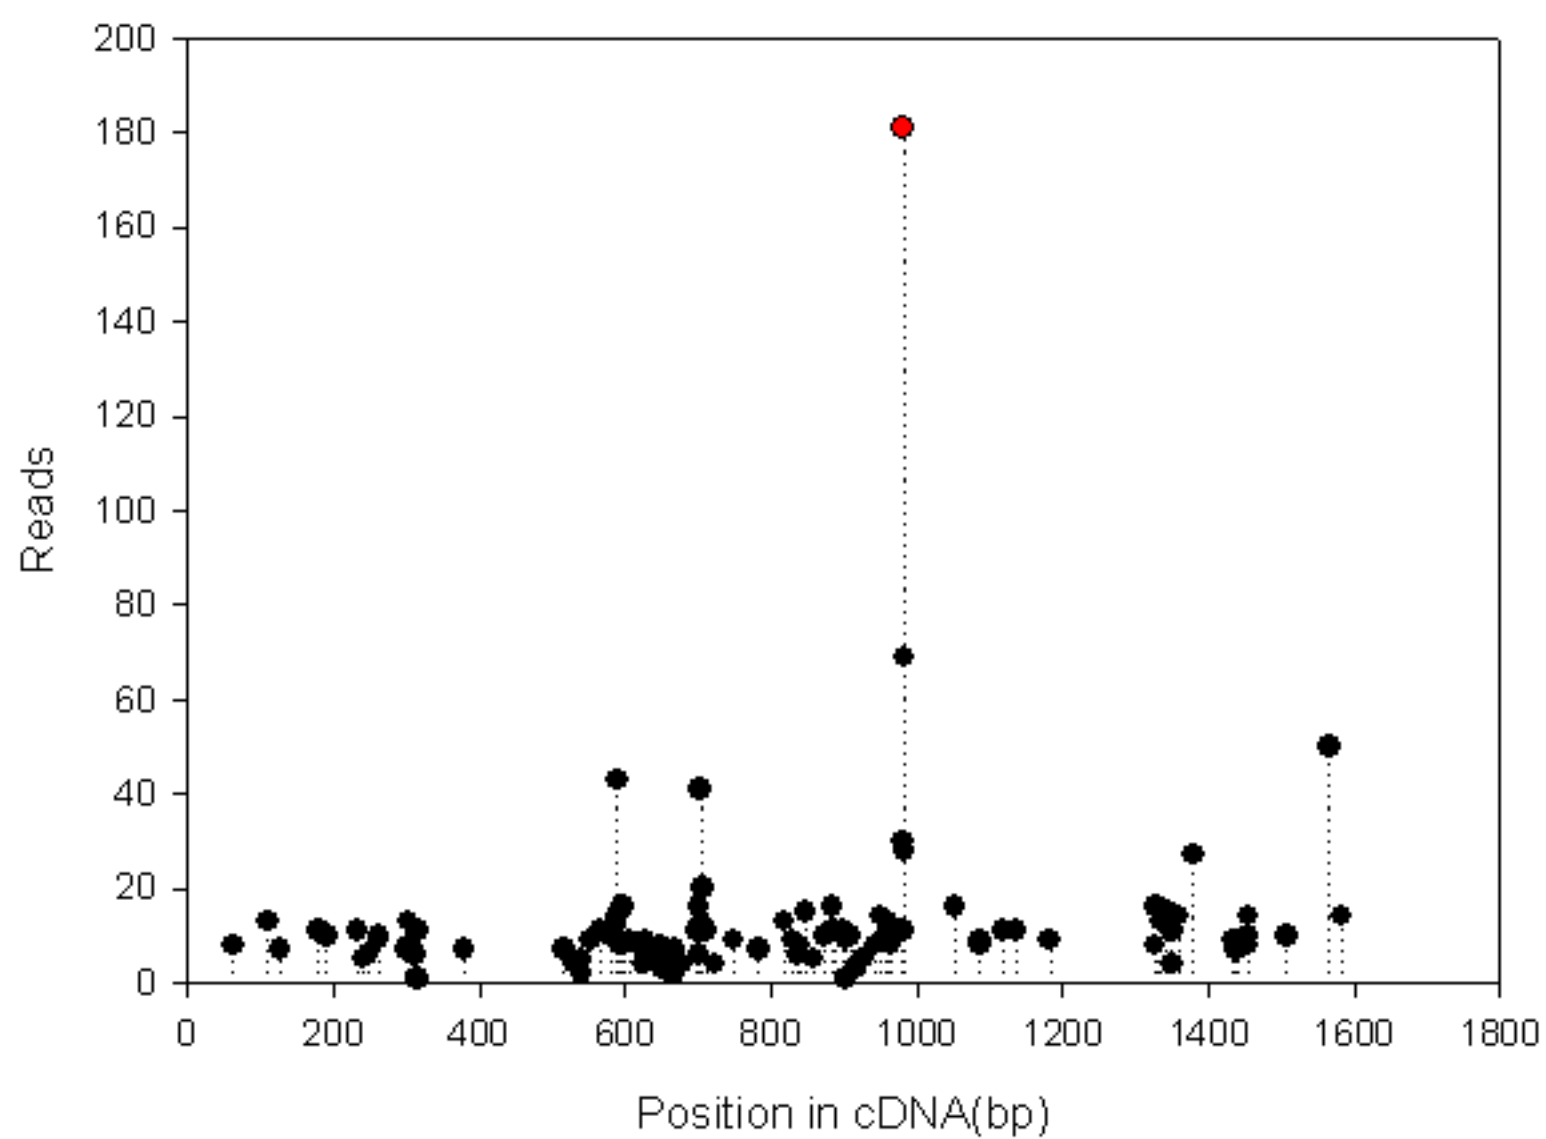

|                                  |                   |
|----------------------------------|-------------------|
| 5' CUGUGCUCUCUCUCUUCUGUCAAAUC 3' | Orange1.1t02265.1 |
| .....                            |                   |
| 3' --CACGAGAGAUAGAAGGCAGU---- 5' | Csi-miR156g.2     |

Csi-miR156h, target=Cs2g05730.1 gene=Cs2g05730  
 Category:1  
 Score=0  
 Cleavage Site=818



```

5' CGUGCUCUCUCUCUUCUGUCA AUGCU 3'      Cs2g05730.1
   ::::::::::::::::::::
3' -CACGAGAGAGAGAAGACAGUU---- 5'      Csi-miR156h
  
```

Csi-miR156h, target=Cs2g23550.1 gene=Cs2g23550  
 Category:2  
 Score=2  
 Cleavage Site=935

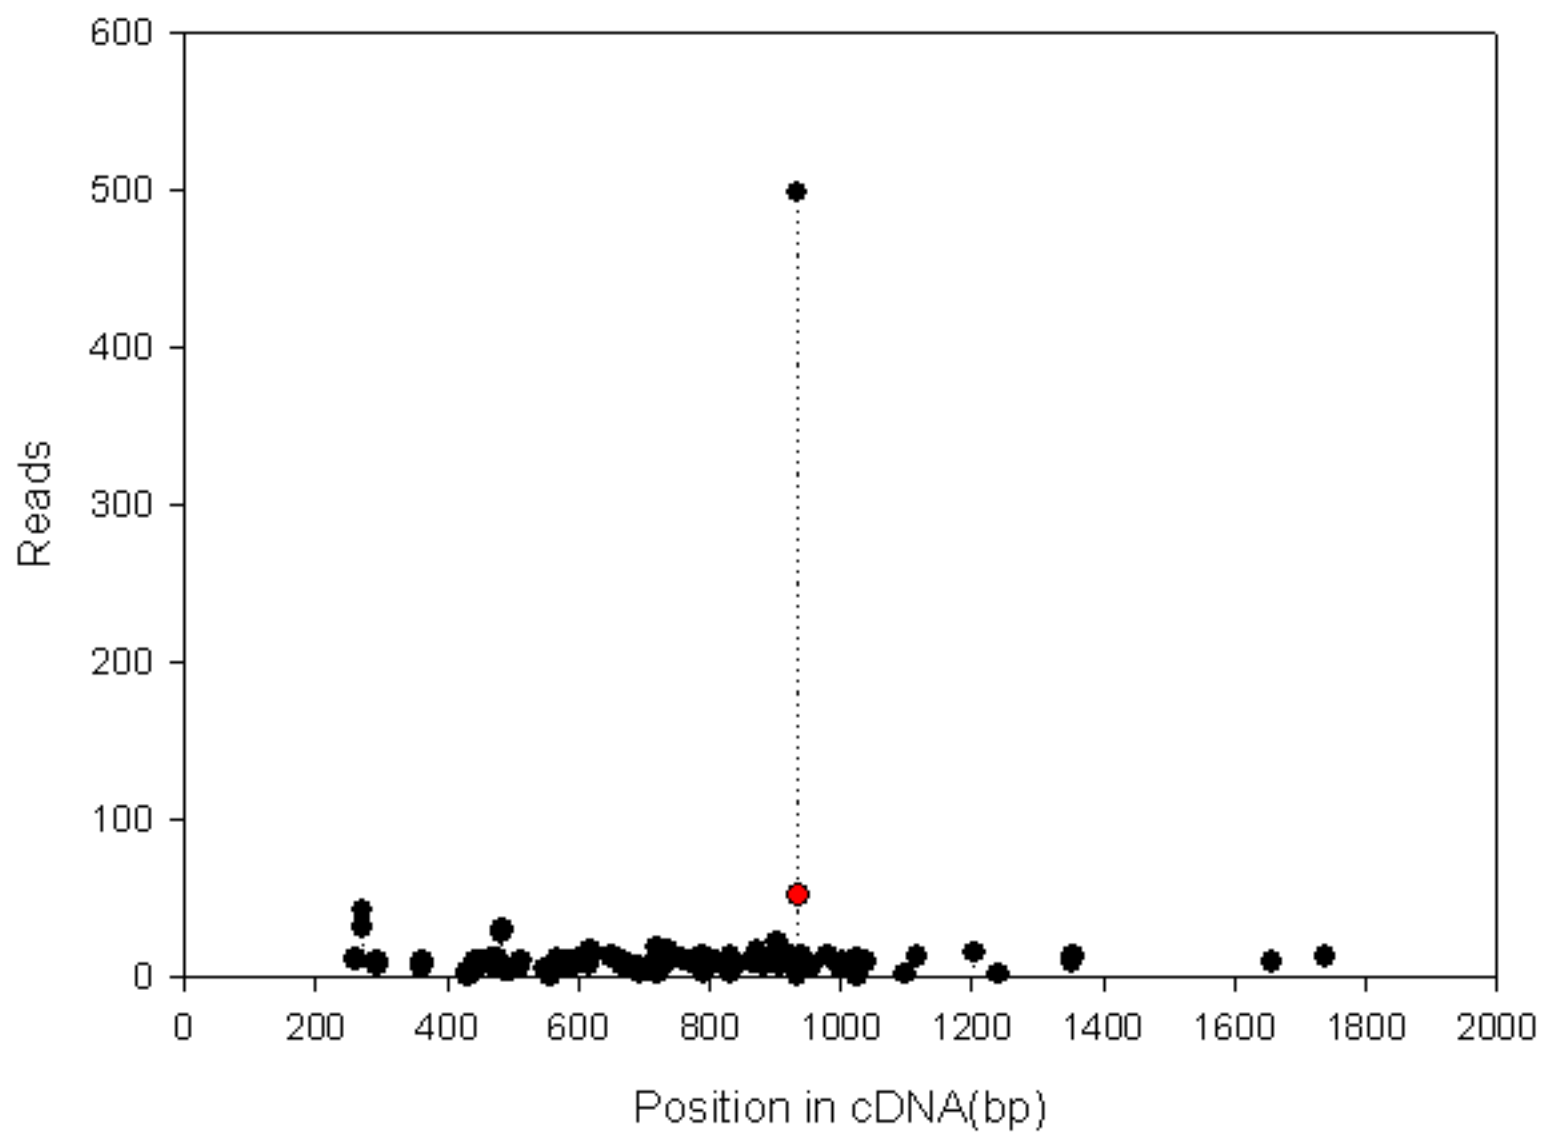

```

5' AUGCUCUCUCUCUUCUGUCAUCCUAG 3'      Cs2g23550.1
   ::::::::::::::::::::
3' CACGAGAGAGAGAAGACAGUU----- 5'    Csi-miR156h

```

Csi-miR156h, target=Cs7g10830.1 gene=Cs7g10830  
 Category:1  
 Score=0  
 Cleavage Site=1183

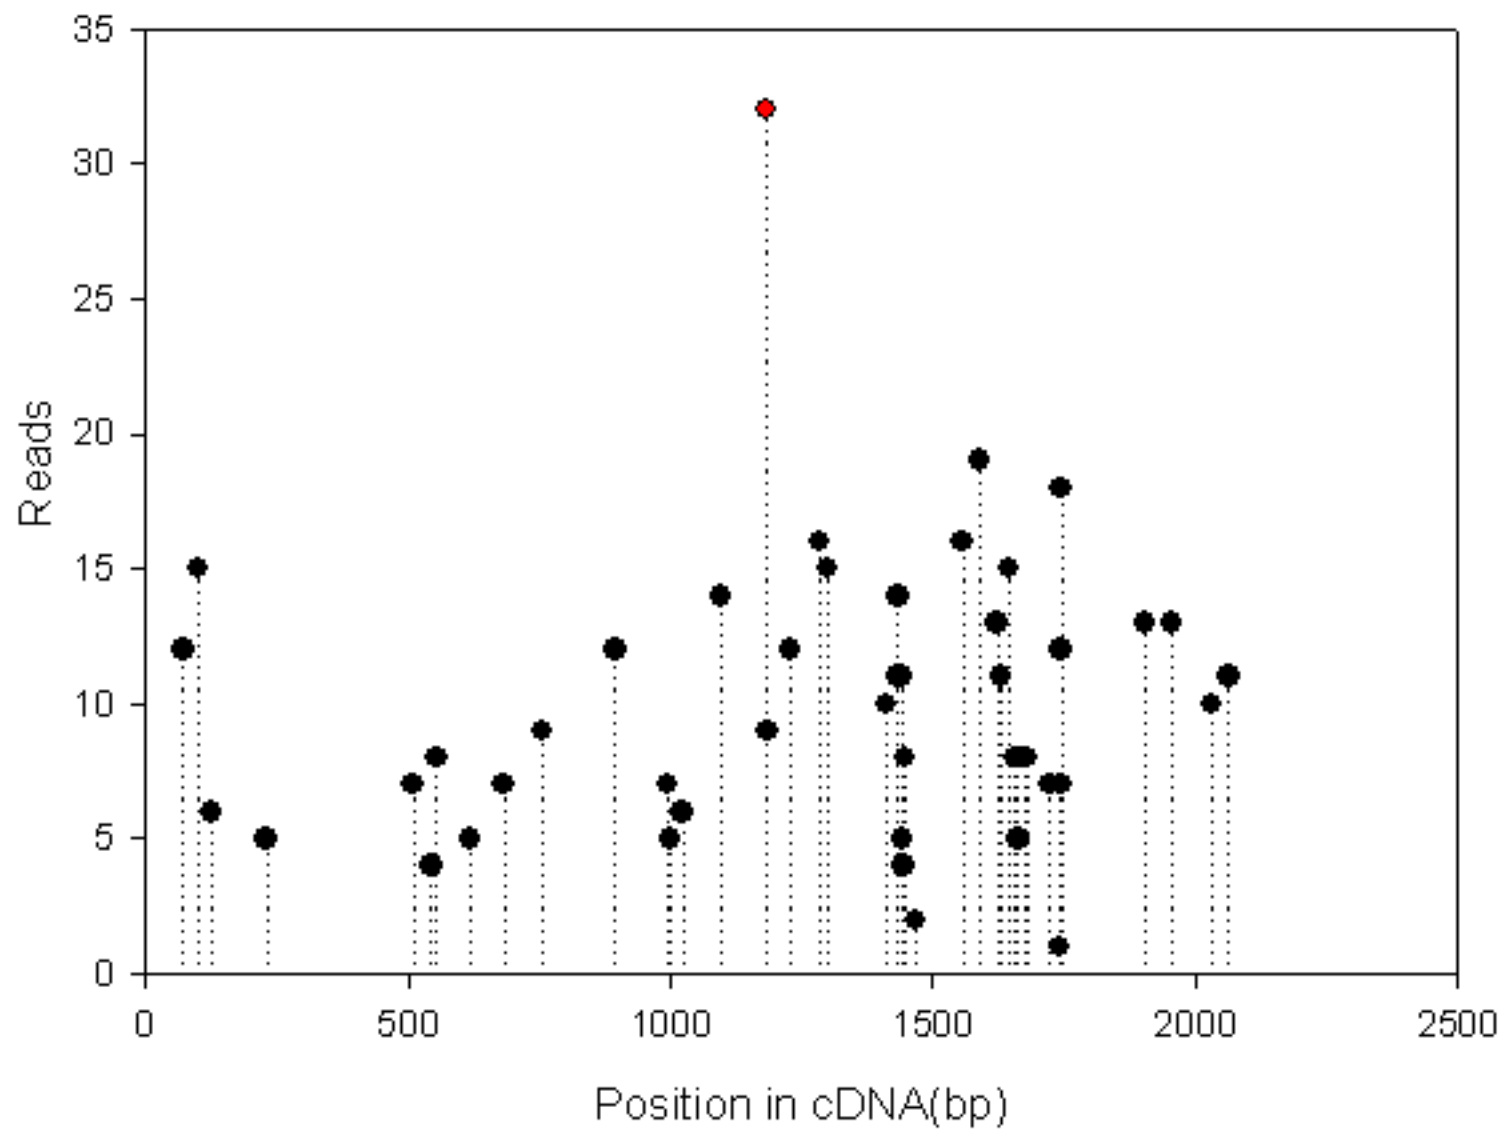

5' AGUGCUCUCUCUCUUCUGUCAAAAAC 3'  
 :::::::::::::::::::::::::::::  
 3' -CACGAGAGAGAGAAGACAGUU---- 5'

Cs7g10830.1

Csi-miR156h

Csi-miR156h, target=Orange1.1t02265.1 gene=Orange1.1t02265  
 Category:1  
 Score=0  
 Cleavage Site=982



5' CUGUGCUCUCUCUCUUCUGUCAAAUC 3'  
 :::::::::::::::::::::::::::::  
 3' --CACGAGAGAGAGAAGACAGUU--- 5'

Orange1.1t02265.1

Csi-miR156h

Csi-miR159, target=Cs3g06390.1 gene=Cs3g06390  
 Category:2  
 Score=3.5  
 Cleavage Site=773

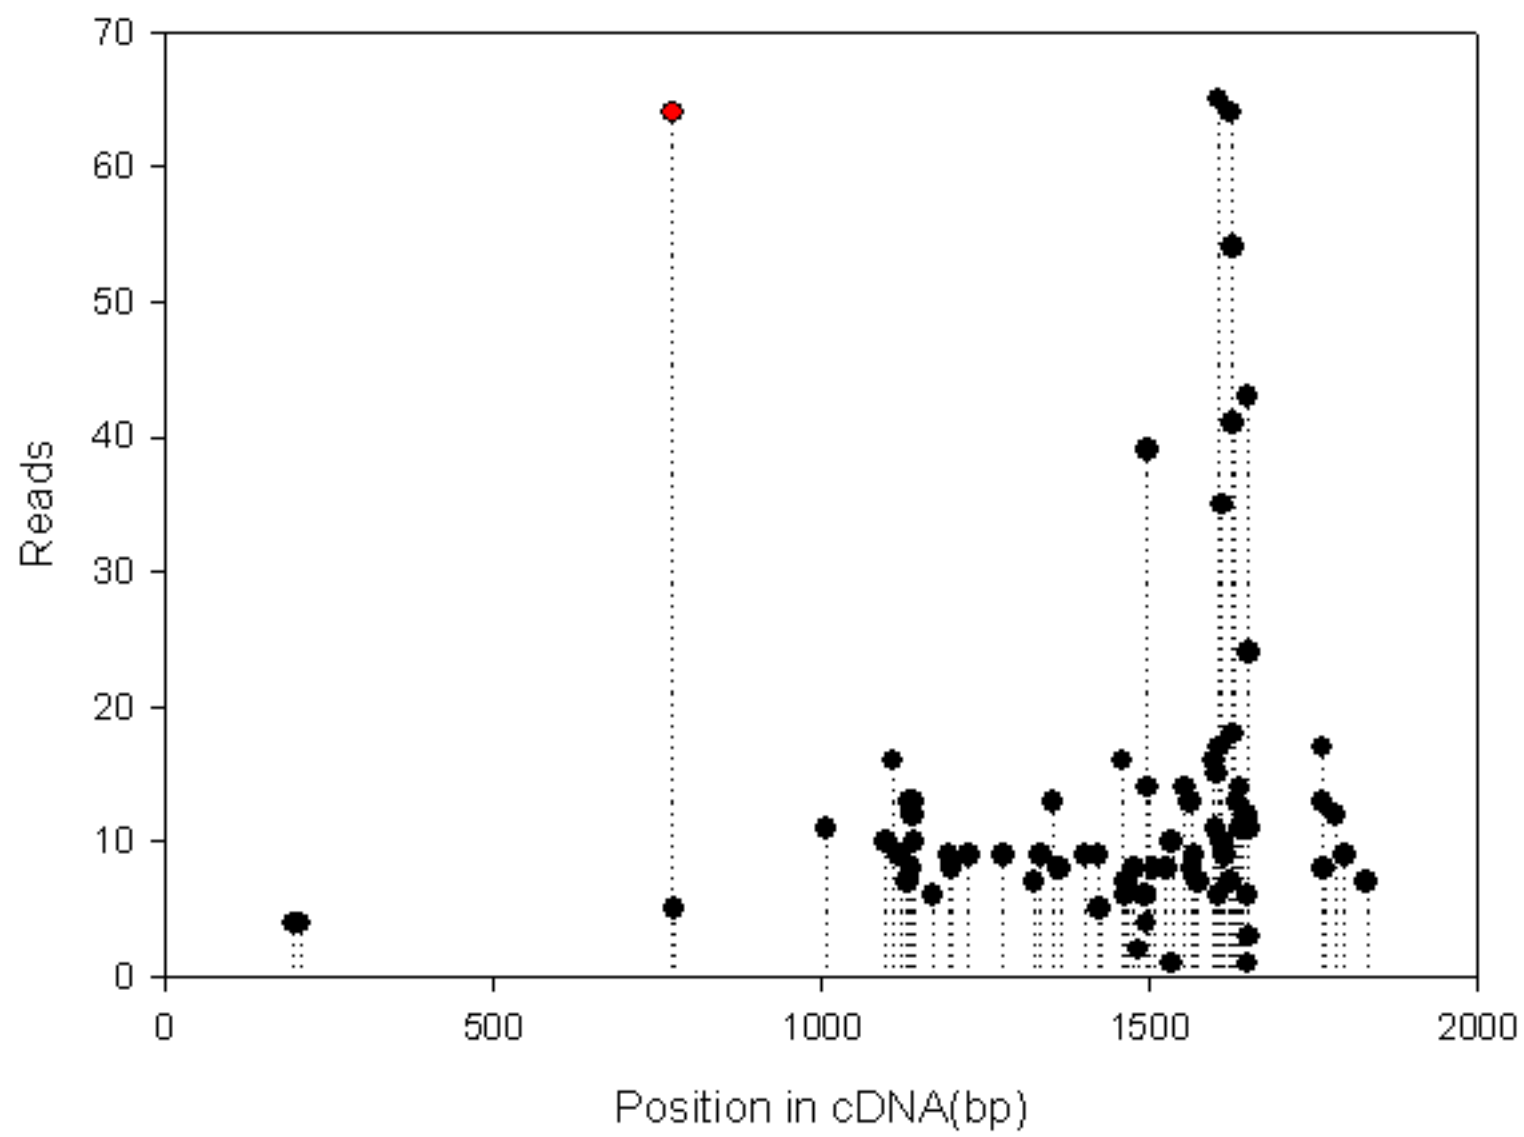

```

5' UUGGAGCUCCCUUCACUCCAAUUAUAC 3'          Cs3g06390.1
   : : : : : : : : : : : : : : : :
3' -AUCUCGAGGGAAGUUAGGUUU----- 5'      Csi-miR159
  
```

Csi-miR159, target=Cs6g10950.1 gene=Cs6g10950  
 Category:1  
 Score=4  
 Cleavage Site=5461

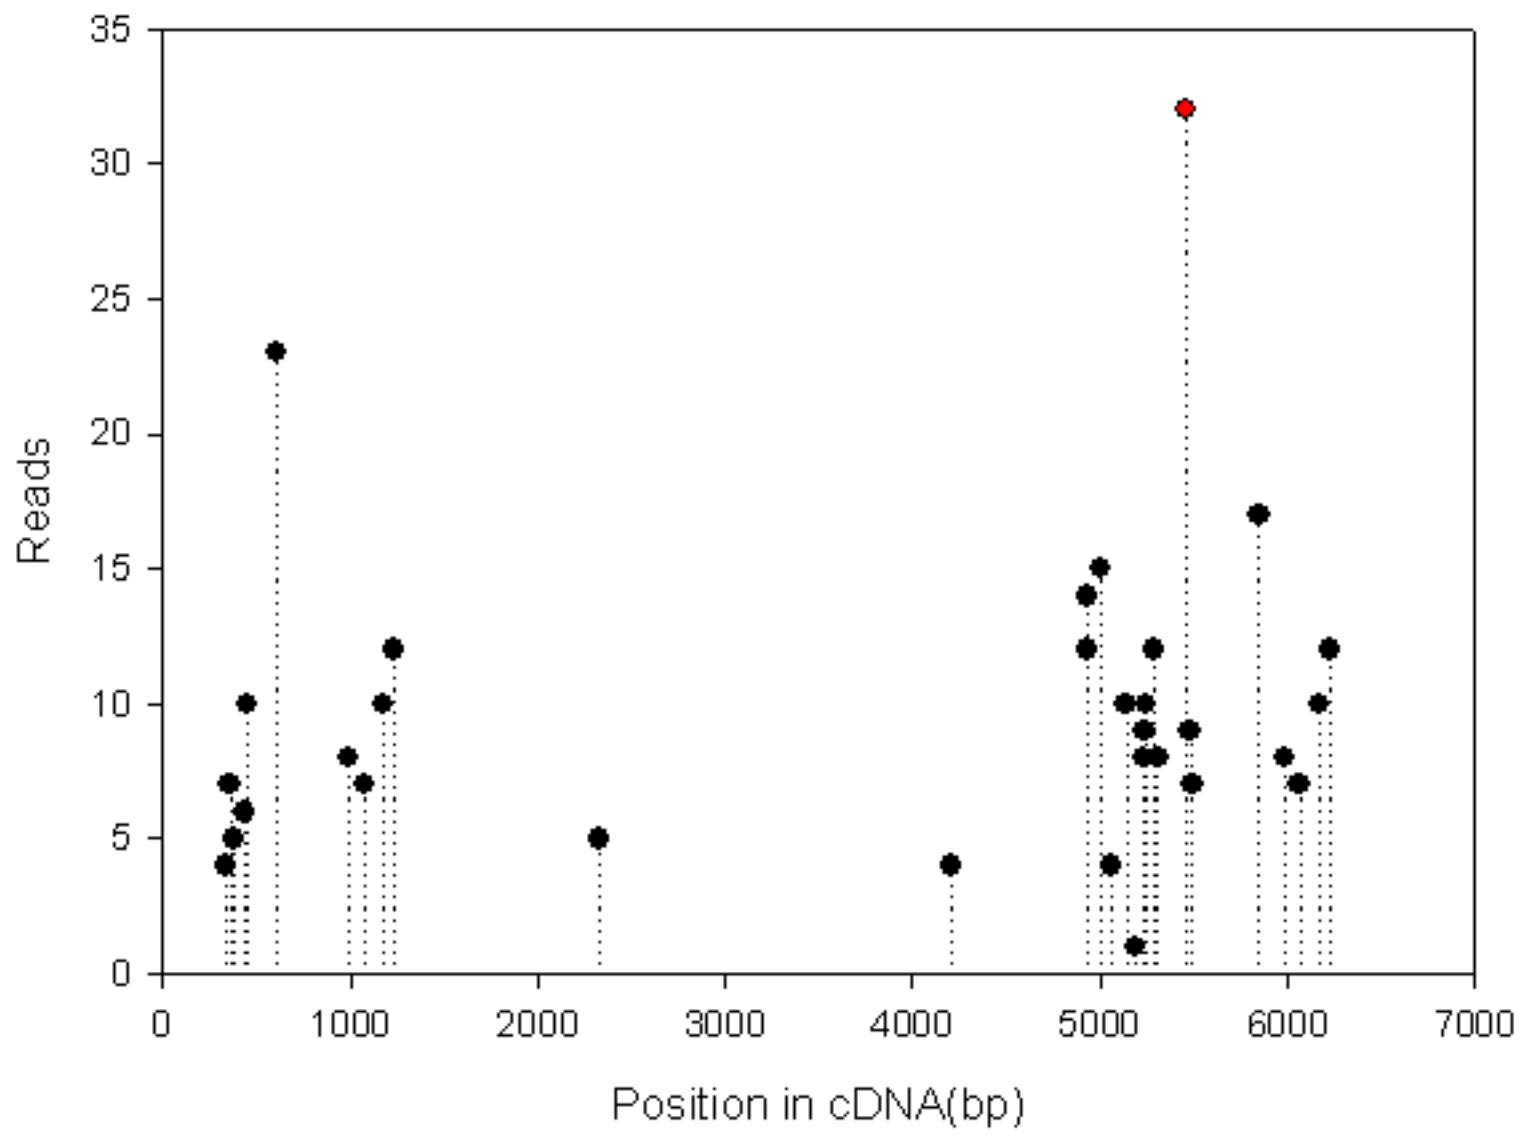

```

5' AAGAGCUCUACUUCAAUCCAAGCUUU 3'      Cs6g10950.1
   : : : : : . : : : : : : : : : .
3' AUCUCGAGG-GAAGUUAGGUUU---- 5'      Csi-miR159
  
```



Csi-miR159b, target=Cs3g06390.1 gene=Cs3g06390  
 Category:2  
 Score=0  
 Cleavage Site=773

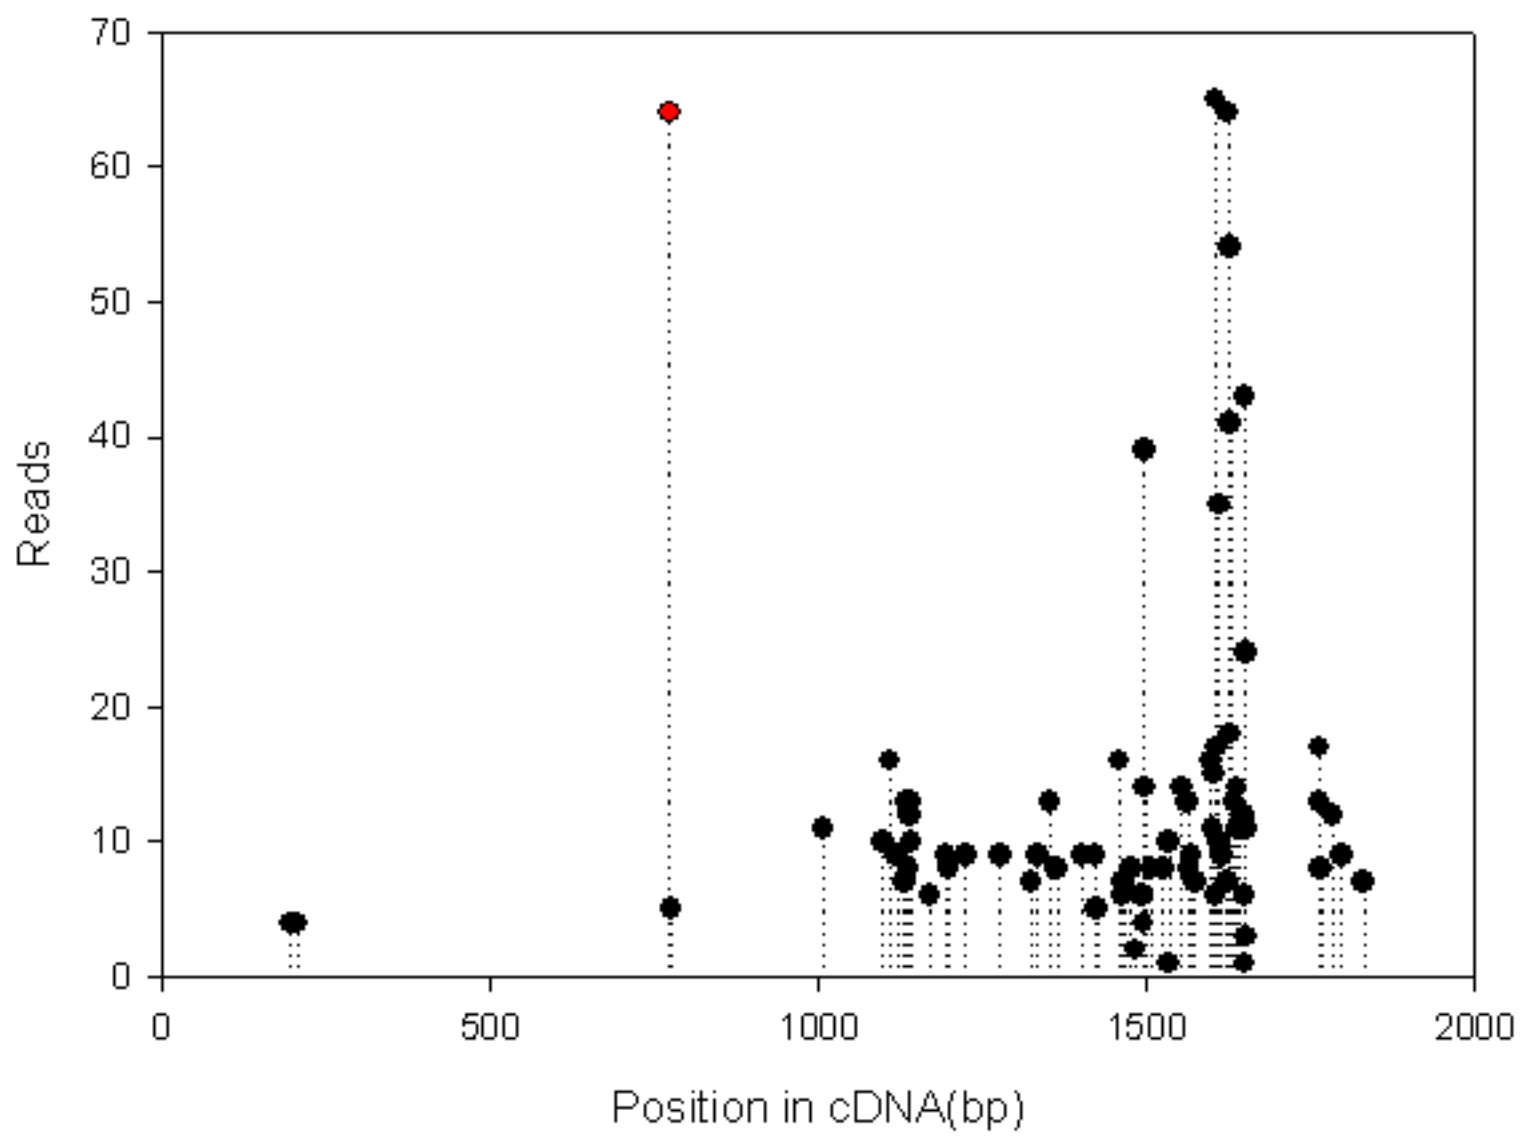

```

5' UGGAGCUCCCUUCACUCCAAUAUAC 3'      Cs3g06390.1
   ::::::::::::::::::::::::::::
3' -ACCUCGAGGGAAGUGAGGUUA----- 5'    Csi-miR159b
  
```

Csi-miR160a-5p, target=Cs3g18940.1 gene=Cs3g18940  
 Category:1  
 Score=0.5  
 Cleavage Site=1423

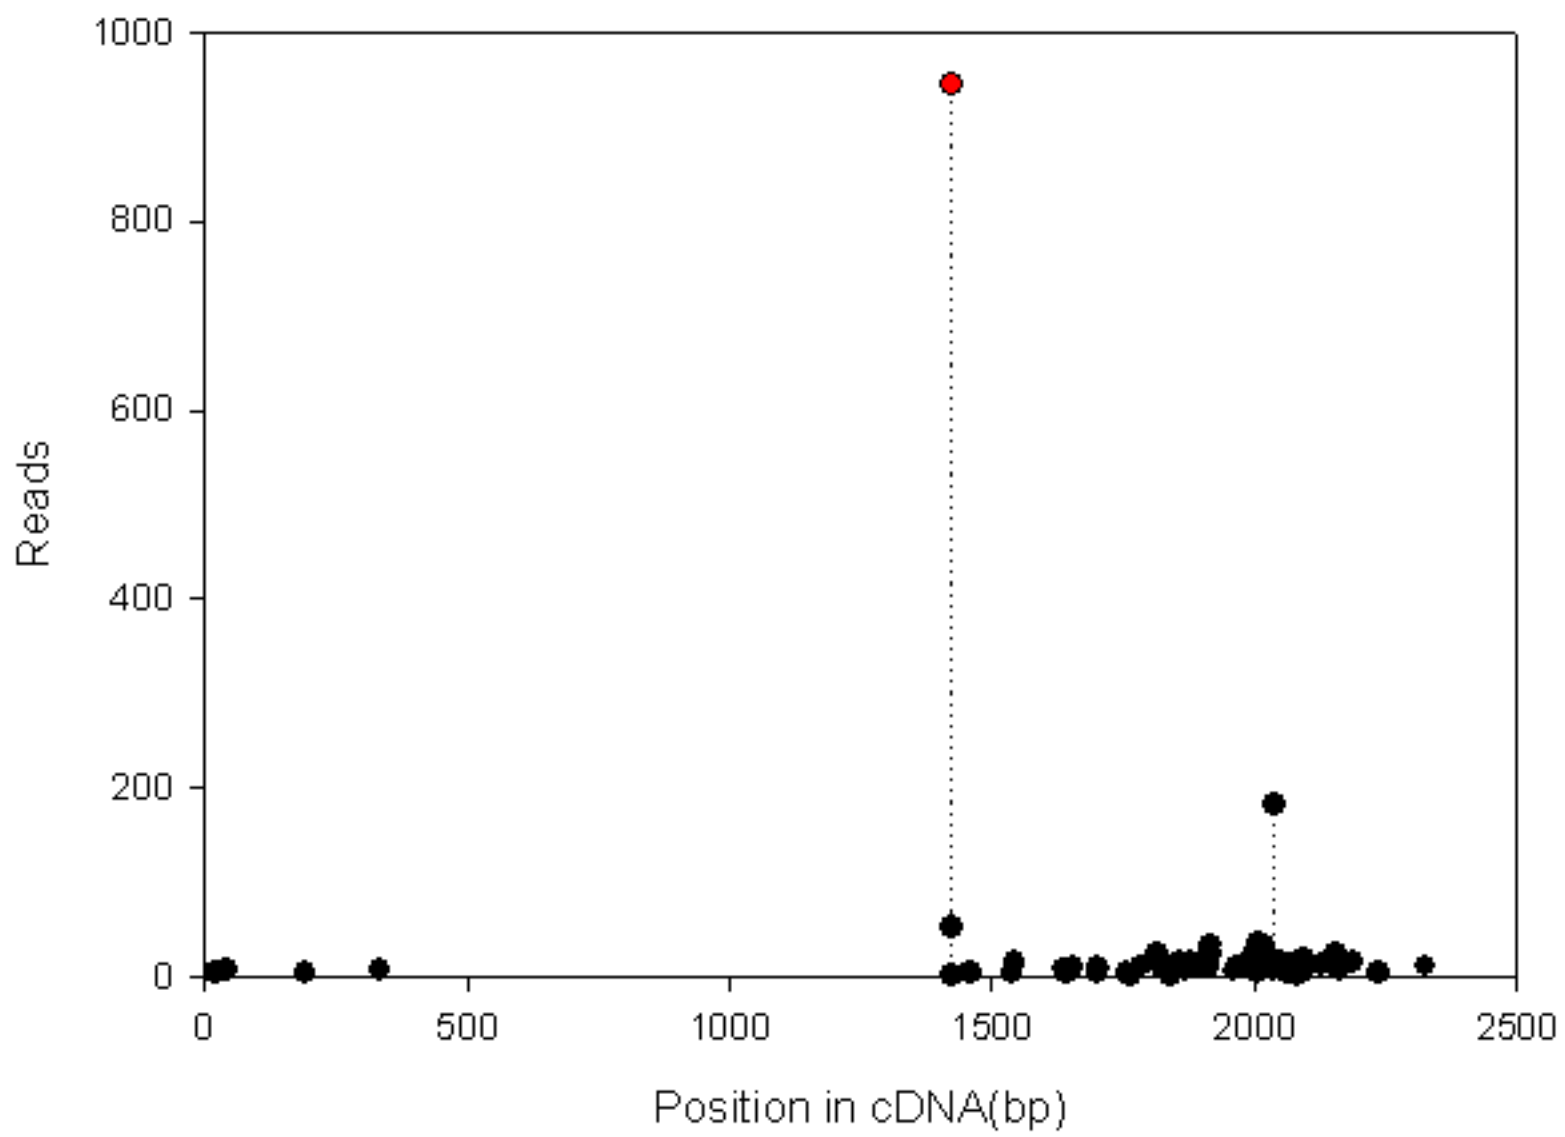

|                                  |                |
|----------------------------------|----------------|
| 5' CUGGCAUGCAGGGAGCCAGGCAAAAU 3' | Cs3g18940.1    |
| .....                            |                |
| 3' -ACCGUAUGUCCCUCGGUCCGU---- 5' | Csi-miR160a-5p |

Csi-miR160a-5p, target=Cs6g11800.1 gene=Cs6g11800  
 Category:1  
 Score=0.5  
 Cleavage Site=2025

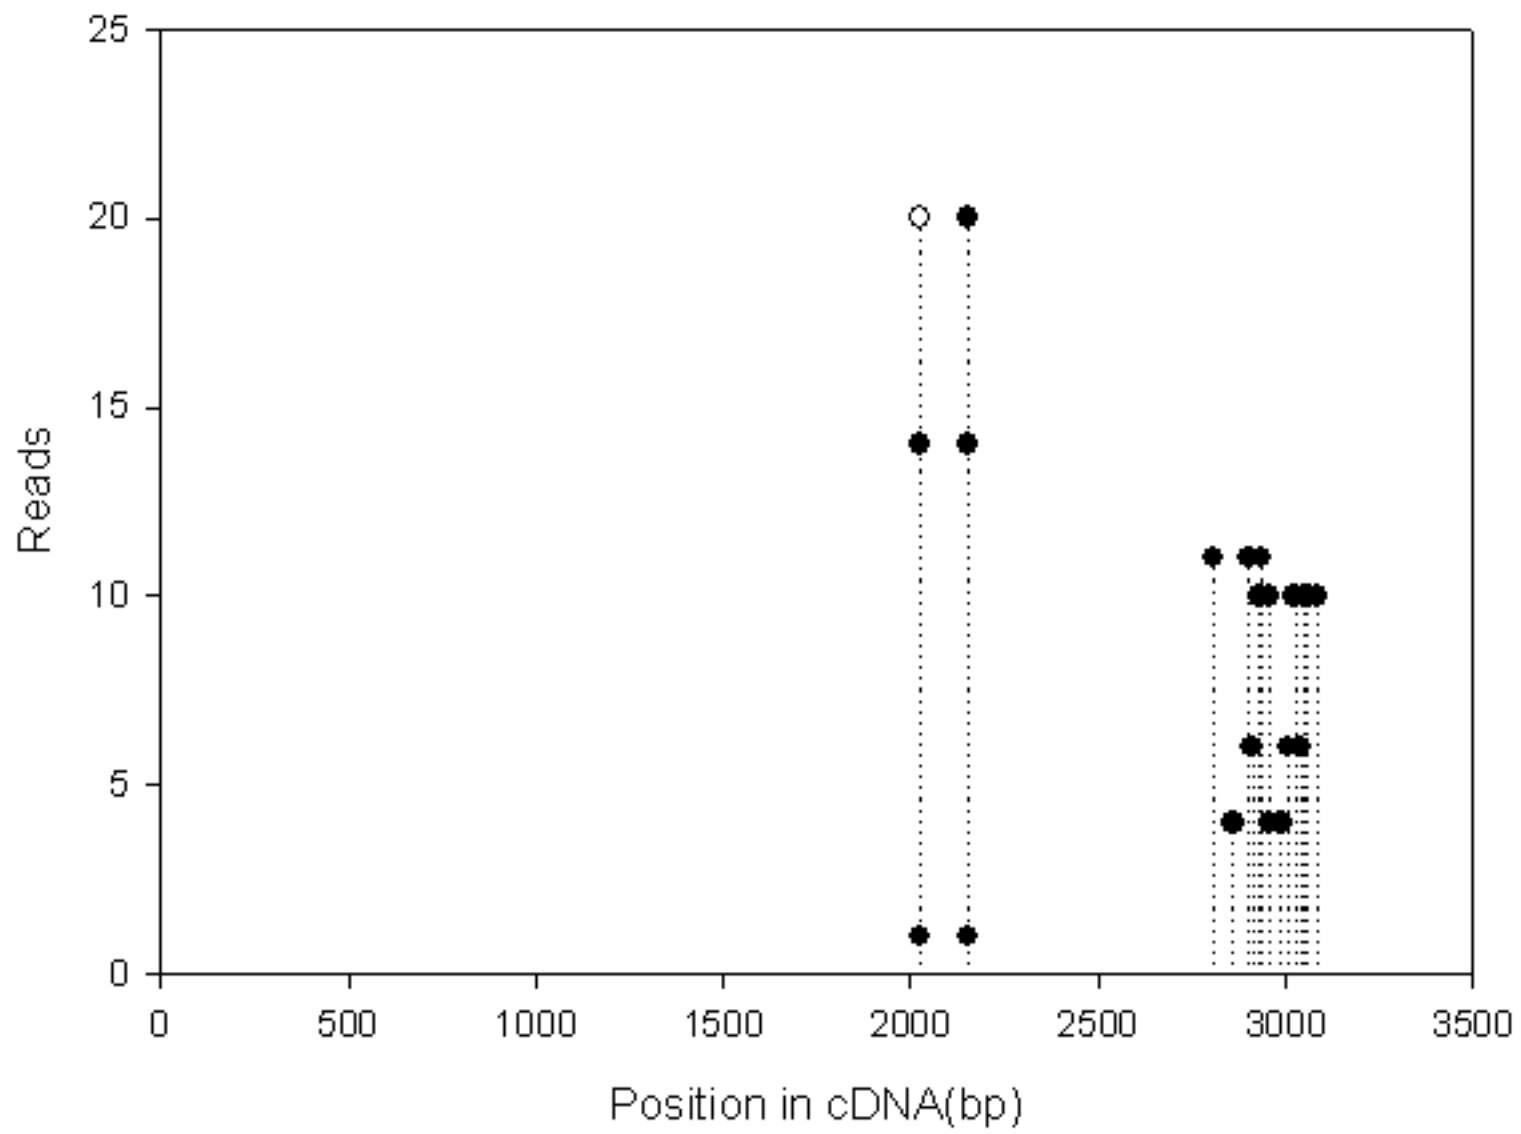

5' CUGGCAUGCAGGGAGCCAGGCAUGC 3'  
 ::::::::::::::::::::::::::::  
 3' -ACCGUAUGUCCUCGGUCCGU----- 5'

Cs6g11800.1

Csi-miR160a-5p

Csi-miR160a-5p, target=Cs7g25670.1 gene=Cs7g25670  
 Category:1  
 Score=1  
 Cleavage Site=1693

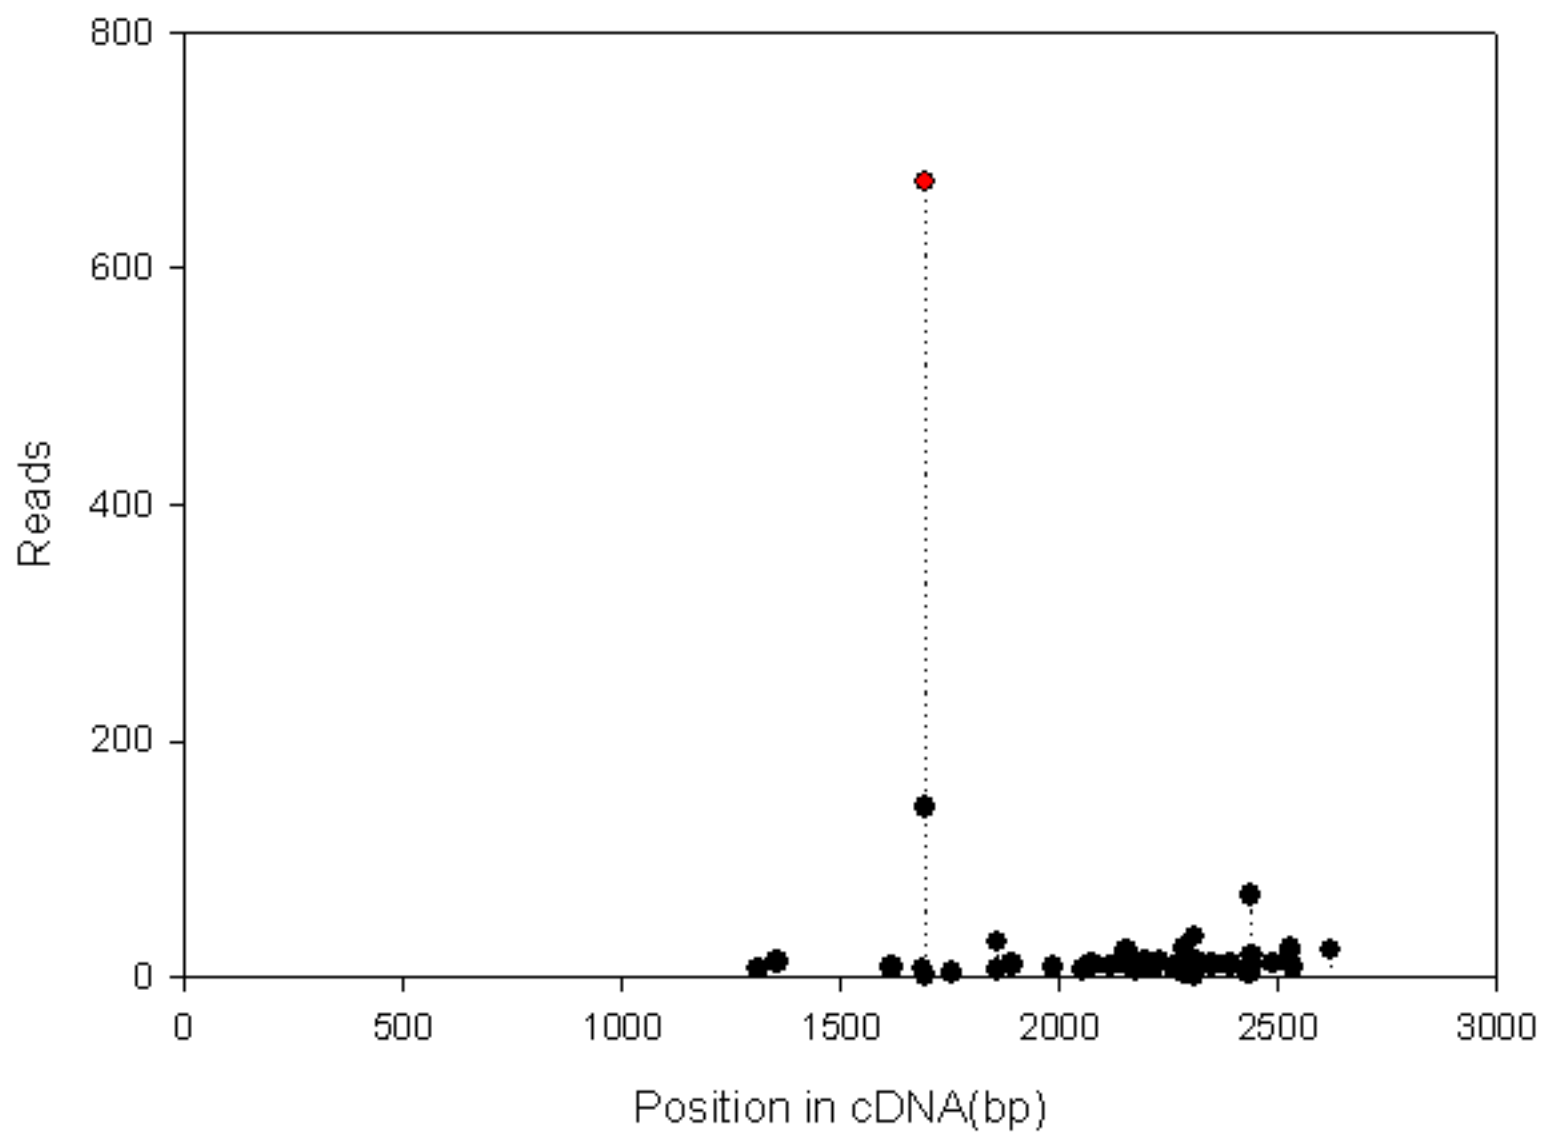

|    |                            |    |                |
|----|----------------------------|----|----------------|
| 5' | CAGGCAUACAGGGAGCCAGGCAUGCC | 3' | Cs7g25670.1    |
|    | ::::::::::::::::::         |    |                |
| 3' | -ACCGUAUGUCCUCGGUCCGU----  | 5' | Csi-miR160a-5p |

Csi-miR160a-5p, target=Cs8g16440.1 gene=Cs8g16440  
 Category:1  
 Score=5  
 Cleavage Site=1978

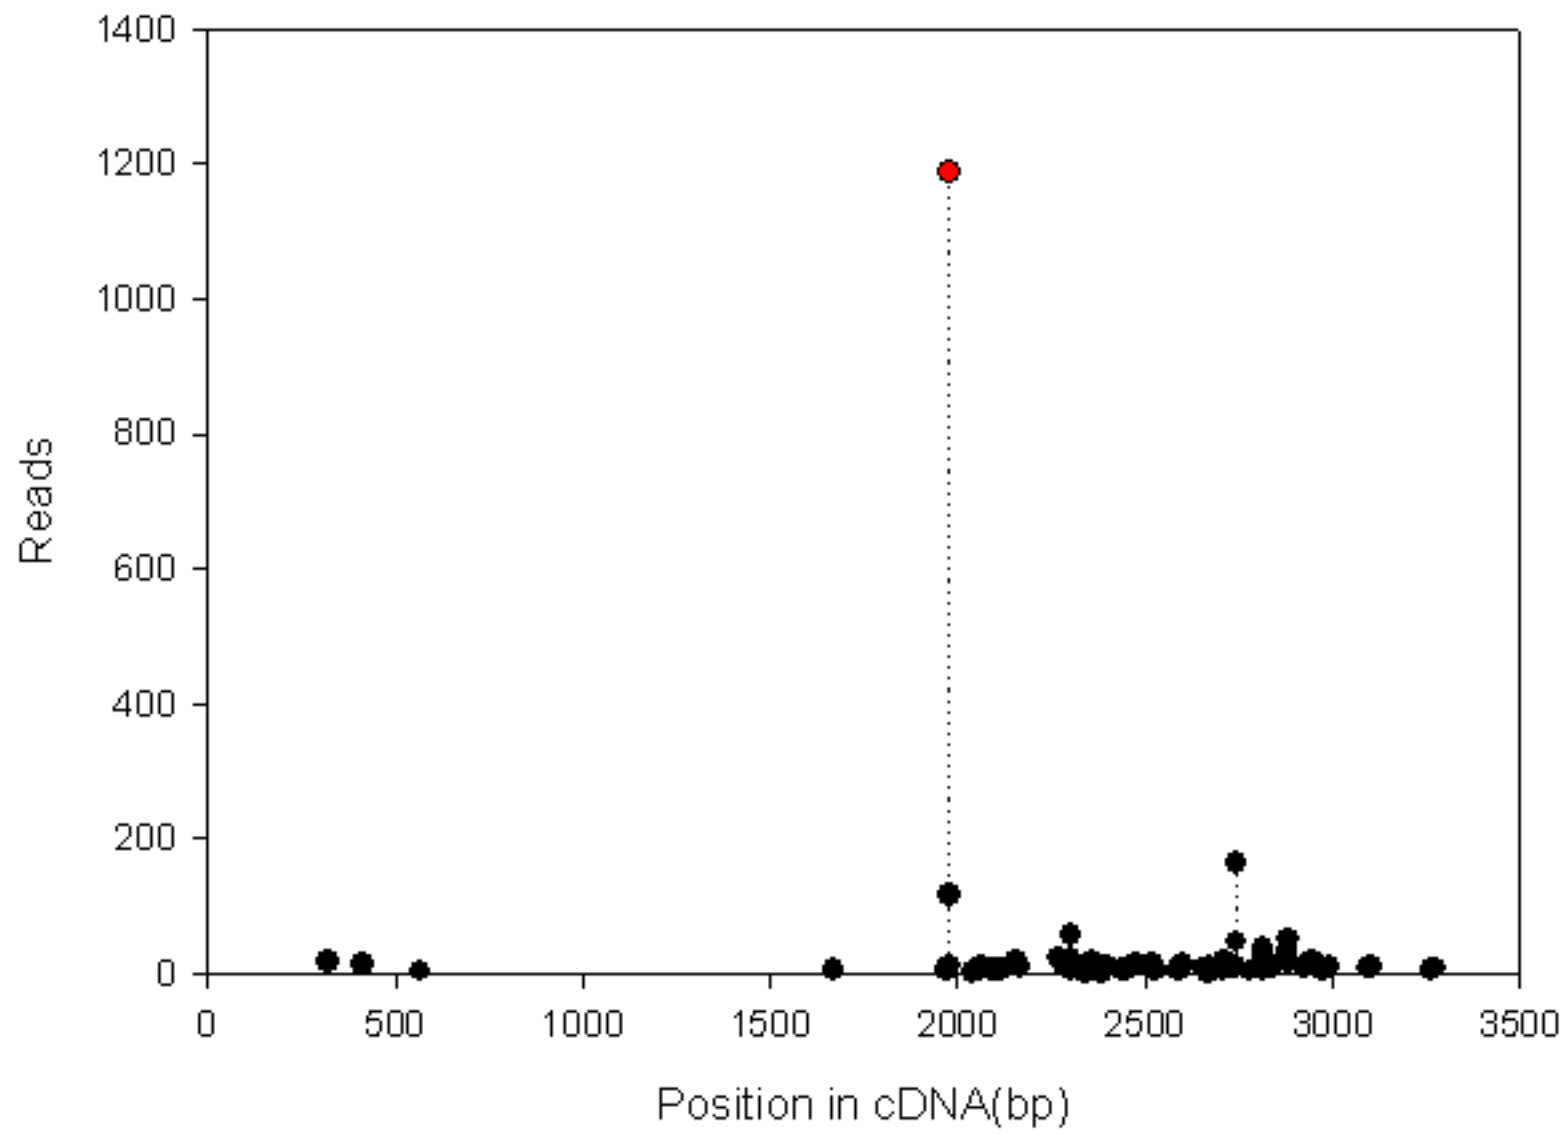

5' CAGGCAUACAGGGAGCCAGGCAUGCU 3'  
 ::::::::::::::::::::::::::::  
 3' -ACCGUAUGUCCUCGGUCCGU---- 5'

Cs8g16440.1

Csi-miR160a-5p

Csi-miR160b-5p, target=Cs3g18940.1 gene=Cs3g18940  
 Category:1  
 Score=1  
 Cleavage Site=1423

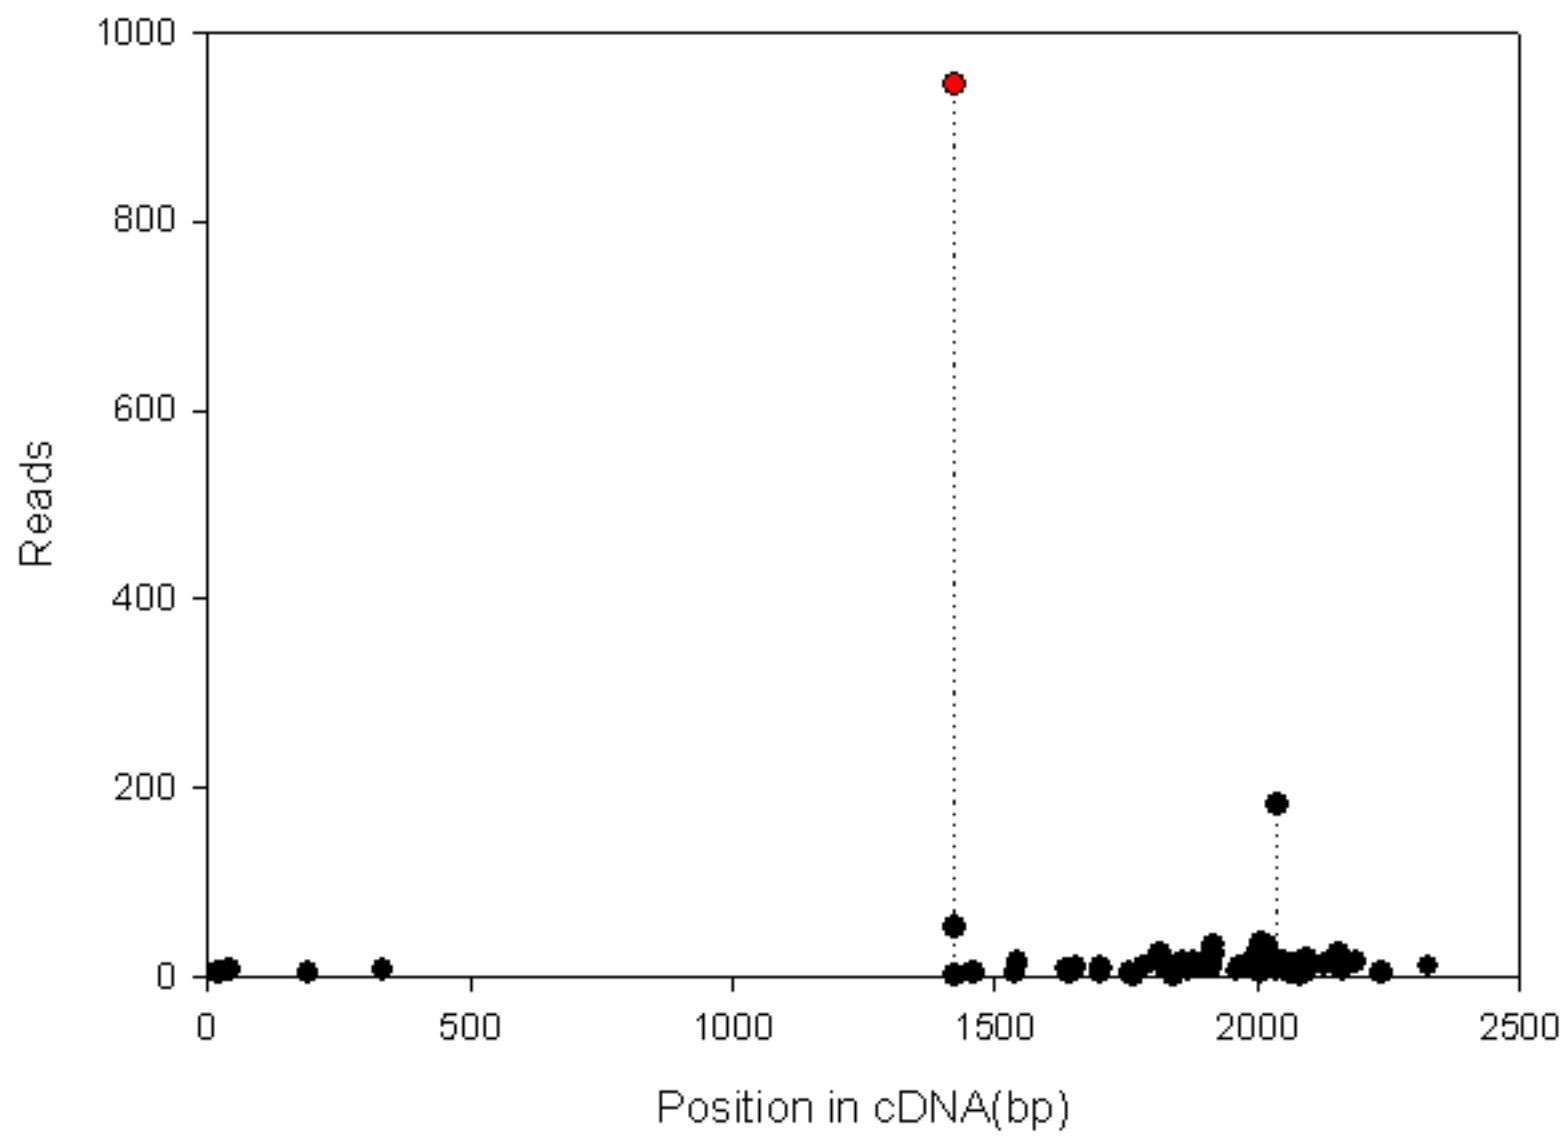

5' CUGGCAUGCAGGGAGCCAGGCAAAAU 3'  
 . : : : : . : : : : . : : : : . : : : : . : : : :  
 3' -GCCGUAUGUCCUCGGUCCGU---- 5'

Cs3g18940.1

Csi-miR160b-5p

Csi-miR160b-5p, target=Cs6g11800.1 gene=Cs6g11800  
 Category:1  
 Score=1  
 Cleavage Site=2025

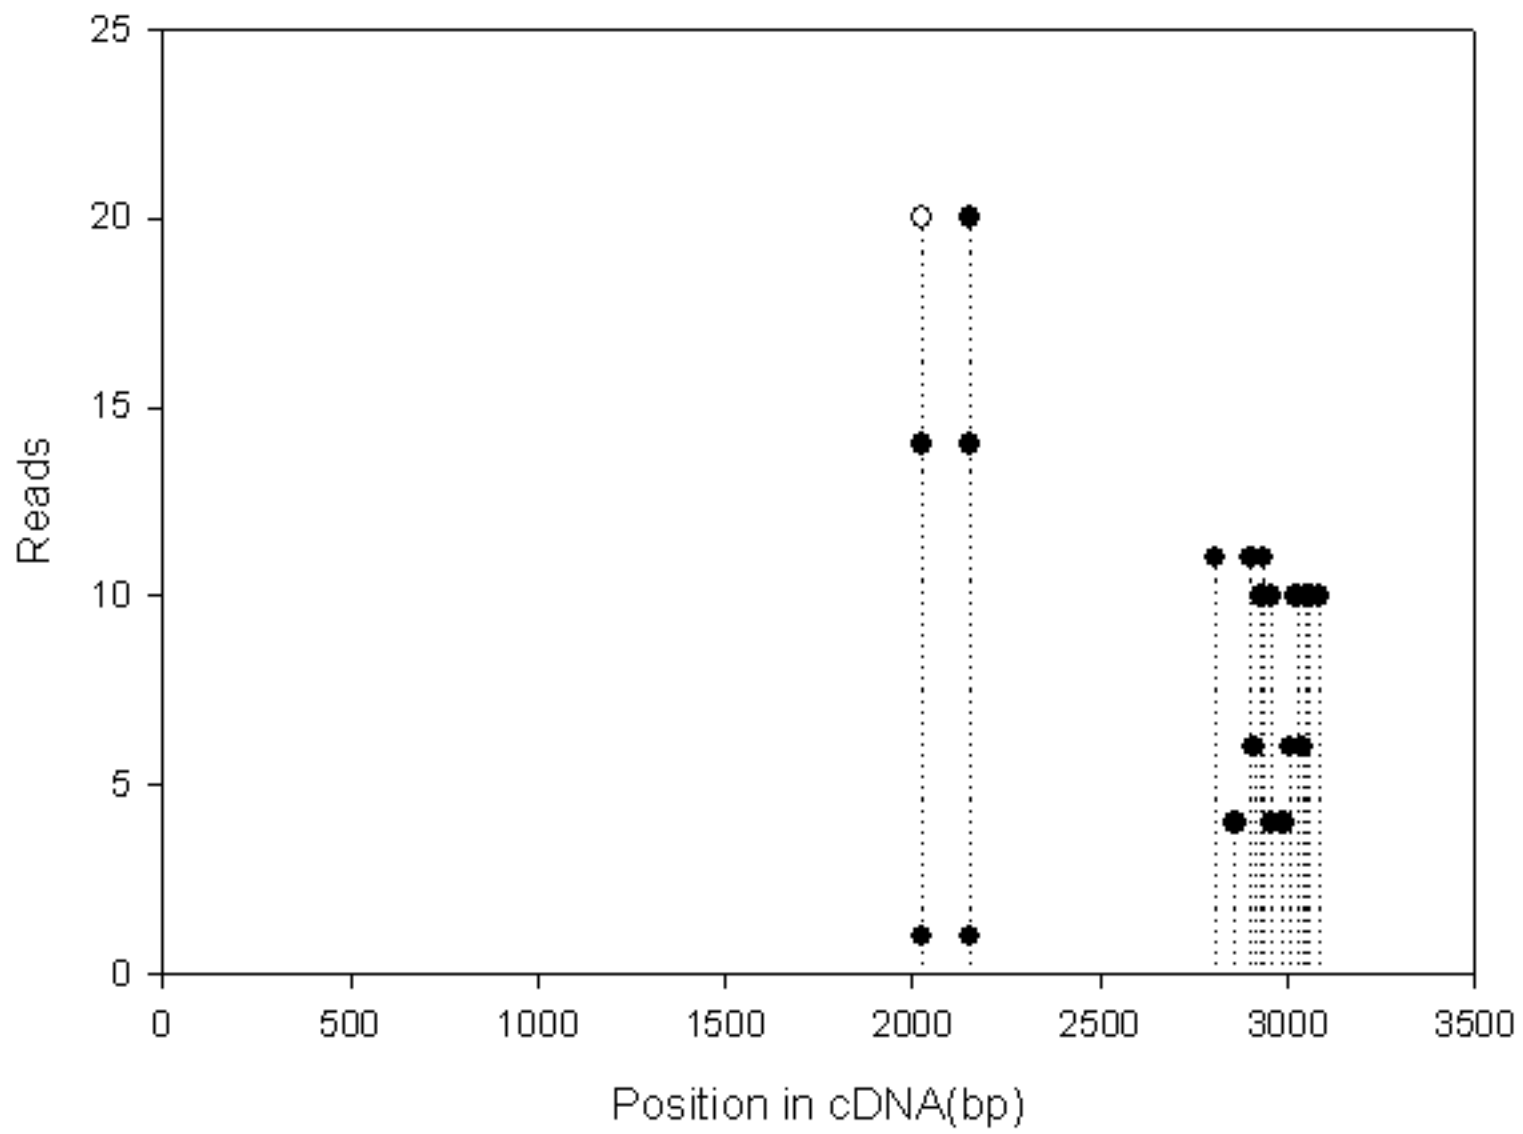

5' CUGGCAUGCAGGGAGCCAGGCAUGC 3'  
 . . . . .  
 3' -GCCGUAUGUCCCUCGGUCCGU---- 5'

Cs6g11800.1

Csi-miR160b-5p

Csi-miR160b-5p, target=Cs7g25670.1 gene=Cs7g25670  
 Category:1  
 Score=1  
 Cleavage Site=1693

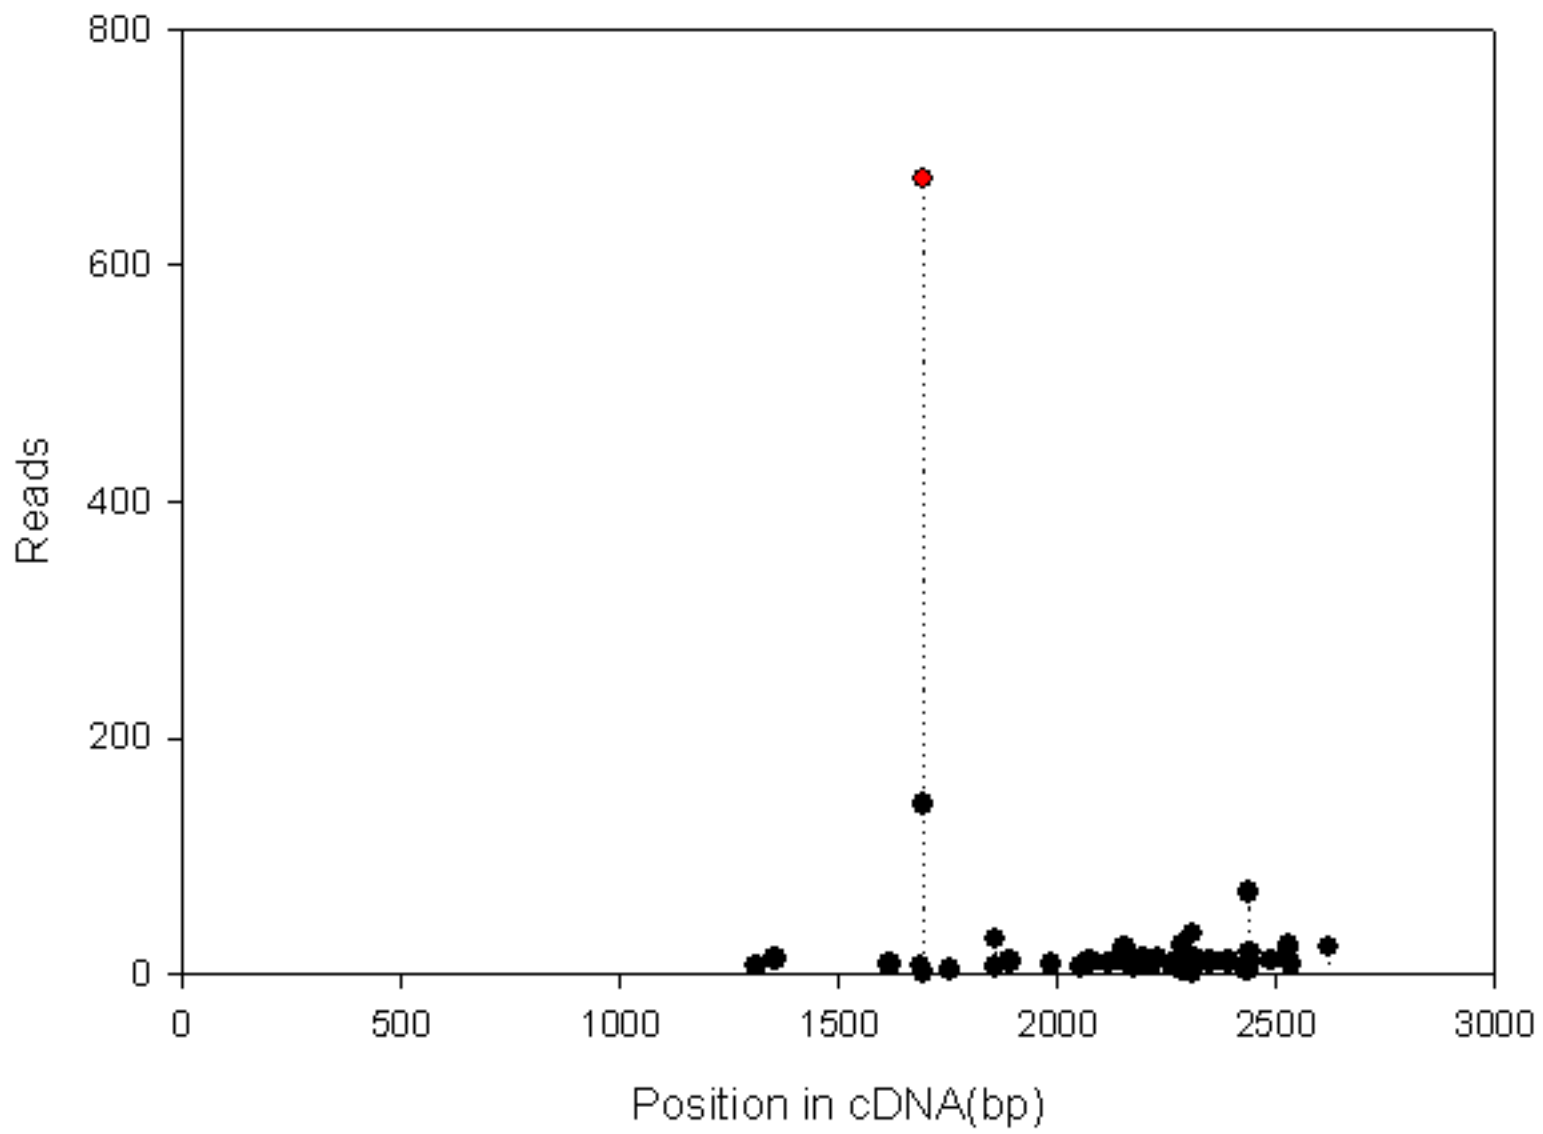

5' CAGGCAUACAGGGAGCCAGGCAUGCC 3'  
 :::::::::::::::::::::::::::::  
 3' -GCCGUAUGUCCCUCGGUCCGU---- 5'

Cs7g25670.1

Csi-miR160b-5p



Csi-miR160b-5p, target=Cs8g16440.1 gene=Cs8g16440  
 Category:1  
 Score=5  
 Cleavage Site=1978

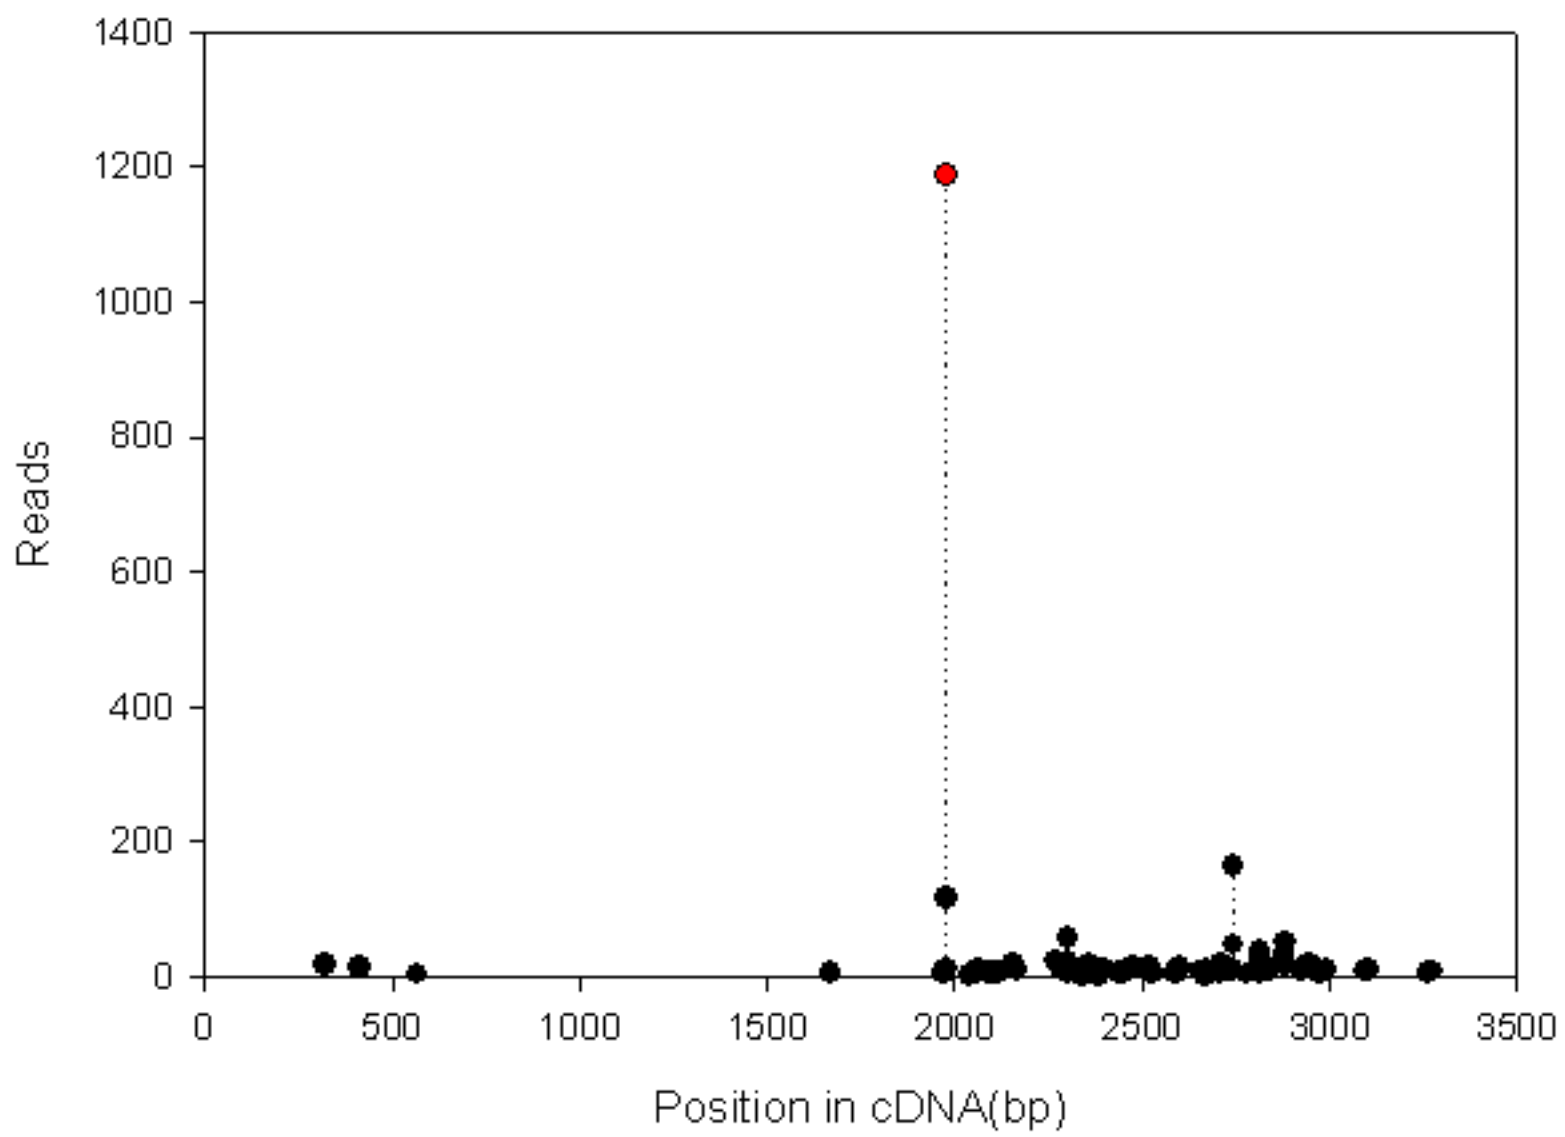

|    |                            |    |                |
|----|----------------------------|----|----------------|
| 5' | CAGGCAUACAGGGAGCCAGGCAUGC  | 3' | Cs8g16440.1    |
|    | .....                      |    |                |
| 3' | -GCCGUAUGUCCCUCGGUCCGU---- | 5' | Csi-miR160b-5p |

Csi-miR164, target=Cs5g10870.1 gene=Cs5g10870  
 Category:1  
 Score=3.5  
 Cleavage Site=1062

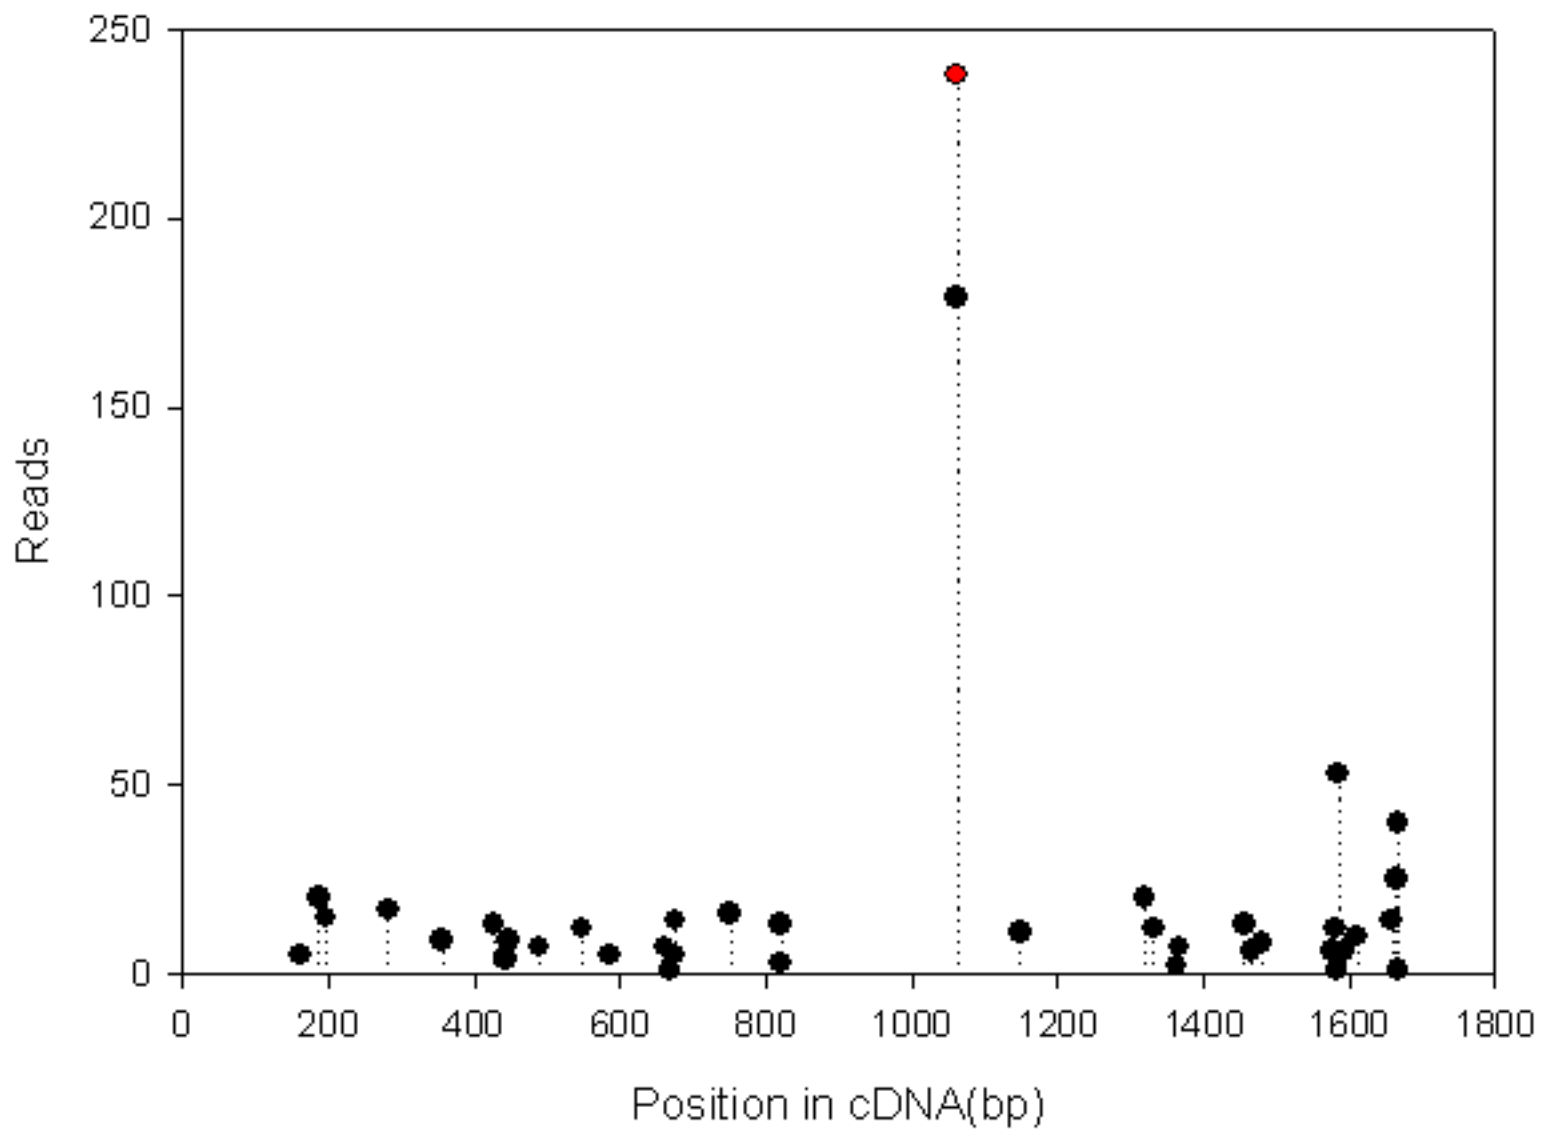

5' GCUUACGUGUCCUGCUUCUCCAAUUC 3' Cs5g10870.1  
 . : : : : . : : : : : : : : : : : : : : :  
 3' -ACGUGCACGGGACGAAGAGGU---- 5' Csi-miR164

Csi-miR164, target=Cs7g01530.1 gene=Cs7g01530  
 Category:3  
 Score=5  
 Cleavage Site=1974

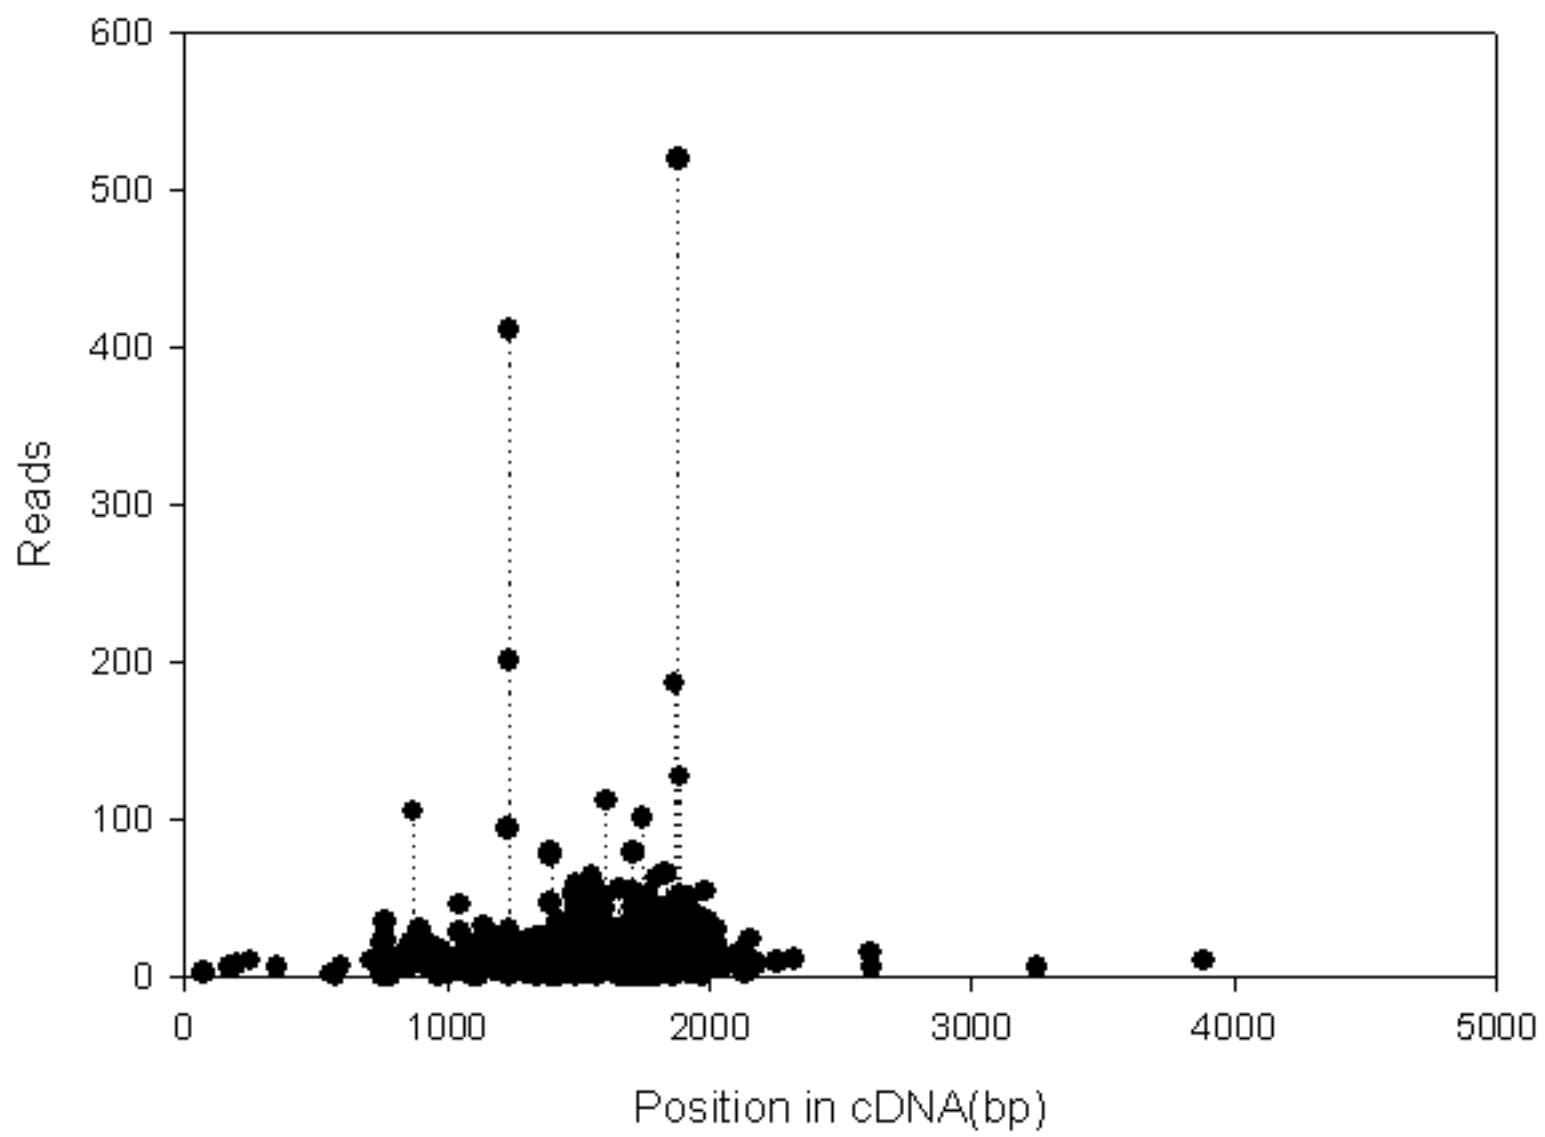

|    |                            |    |             |
|----|----------------------------|----|-------------|
| 5' | UAUGAGGCACAUGCUCUGCUUUUCCA | 3' | Cs7g01530.1 |
|    | .....                      |    |             |
| 3' | -----ACGUGCACGGGACGAAGAGGU | 5' | Csi-miR164  |

Csi-miR166a.1, target=Cs1g15640.1 gene=Cs1g15640  
 Category:3  
 Score=3.5  
 Cleavage Site=1781

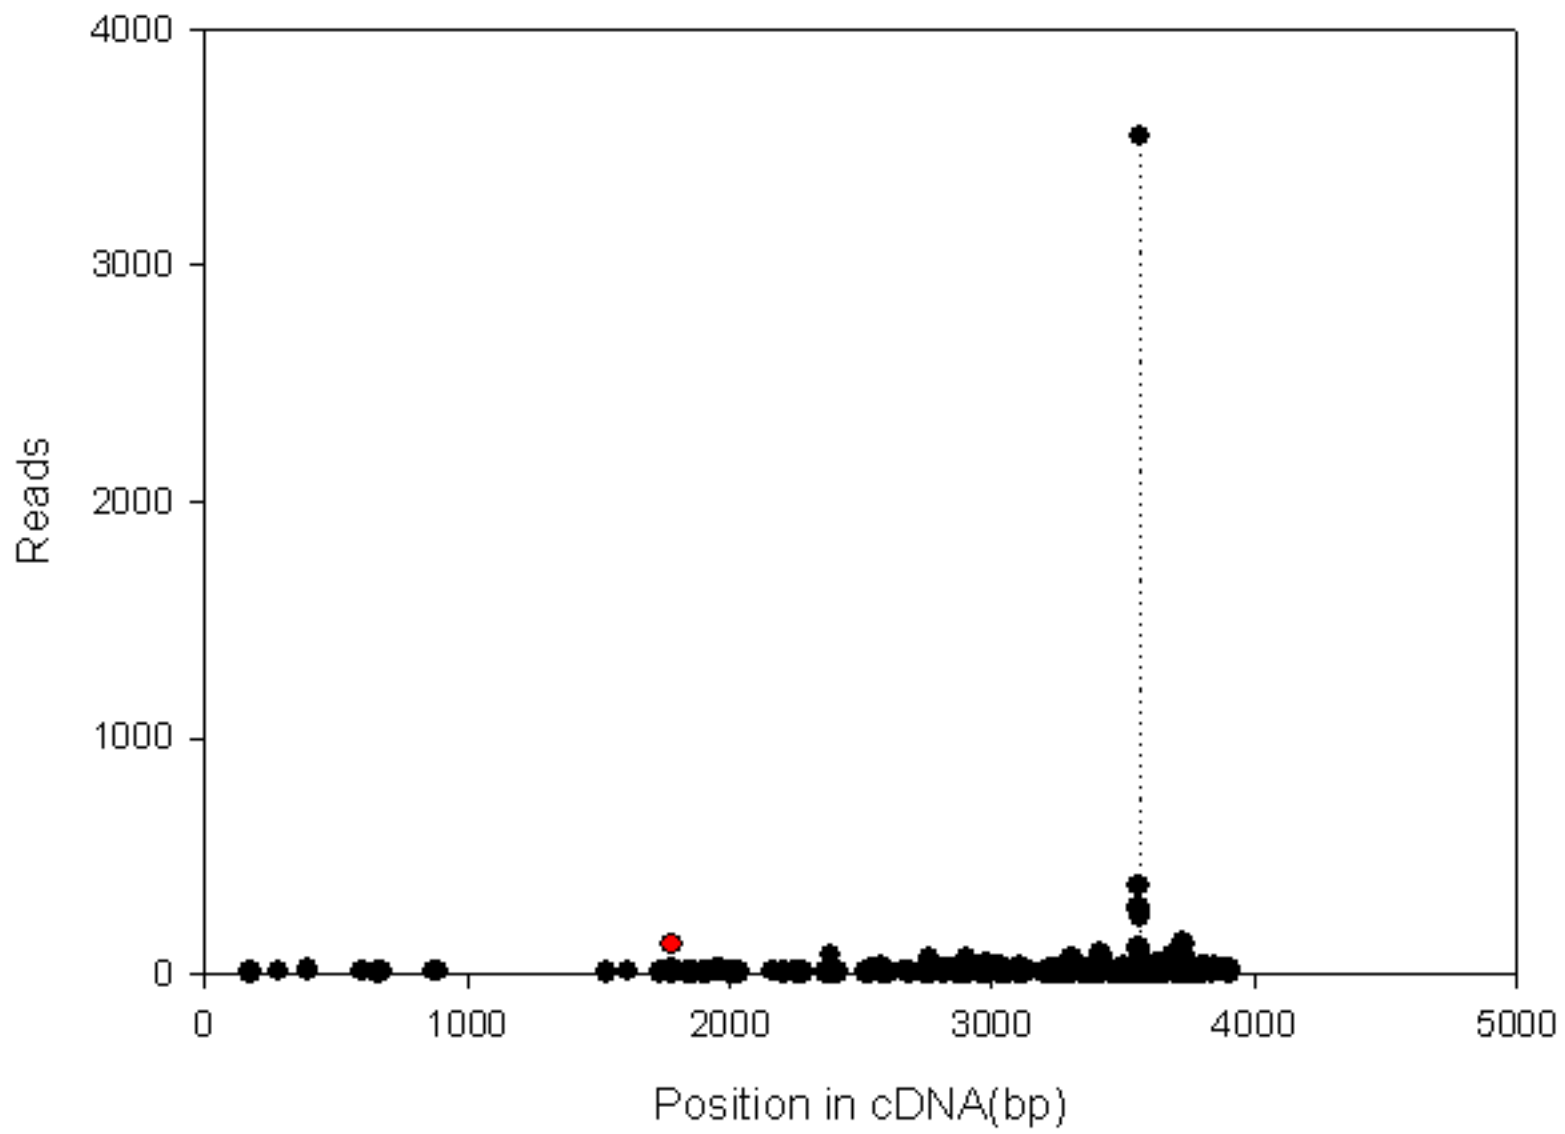

```

5' CCUGGAAUGAAGCCUGGUCGGAUUC 3'      Cs1g15640.1
   ::::::::::::::::::::.
3' CCCC UUACUUCGGACCAGGCU---- 5'      Csi-miR166a.1

```

Csi-miR166a.1, target=Cs2g09770.1 gene=Cs2g09770  
 Category:1  
 Score=4  
 Cleavage Site=1058

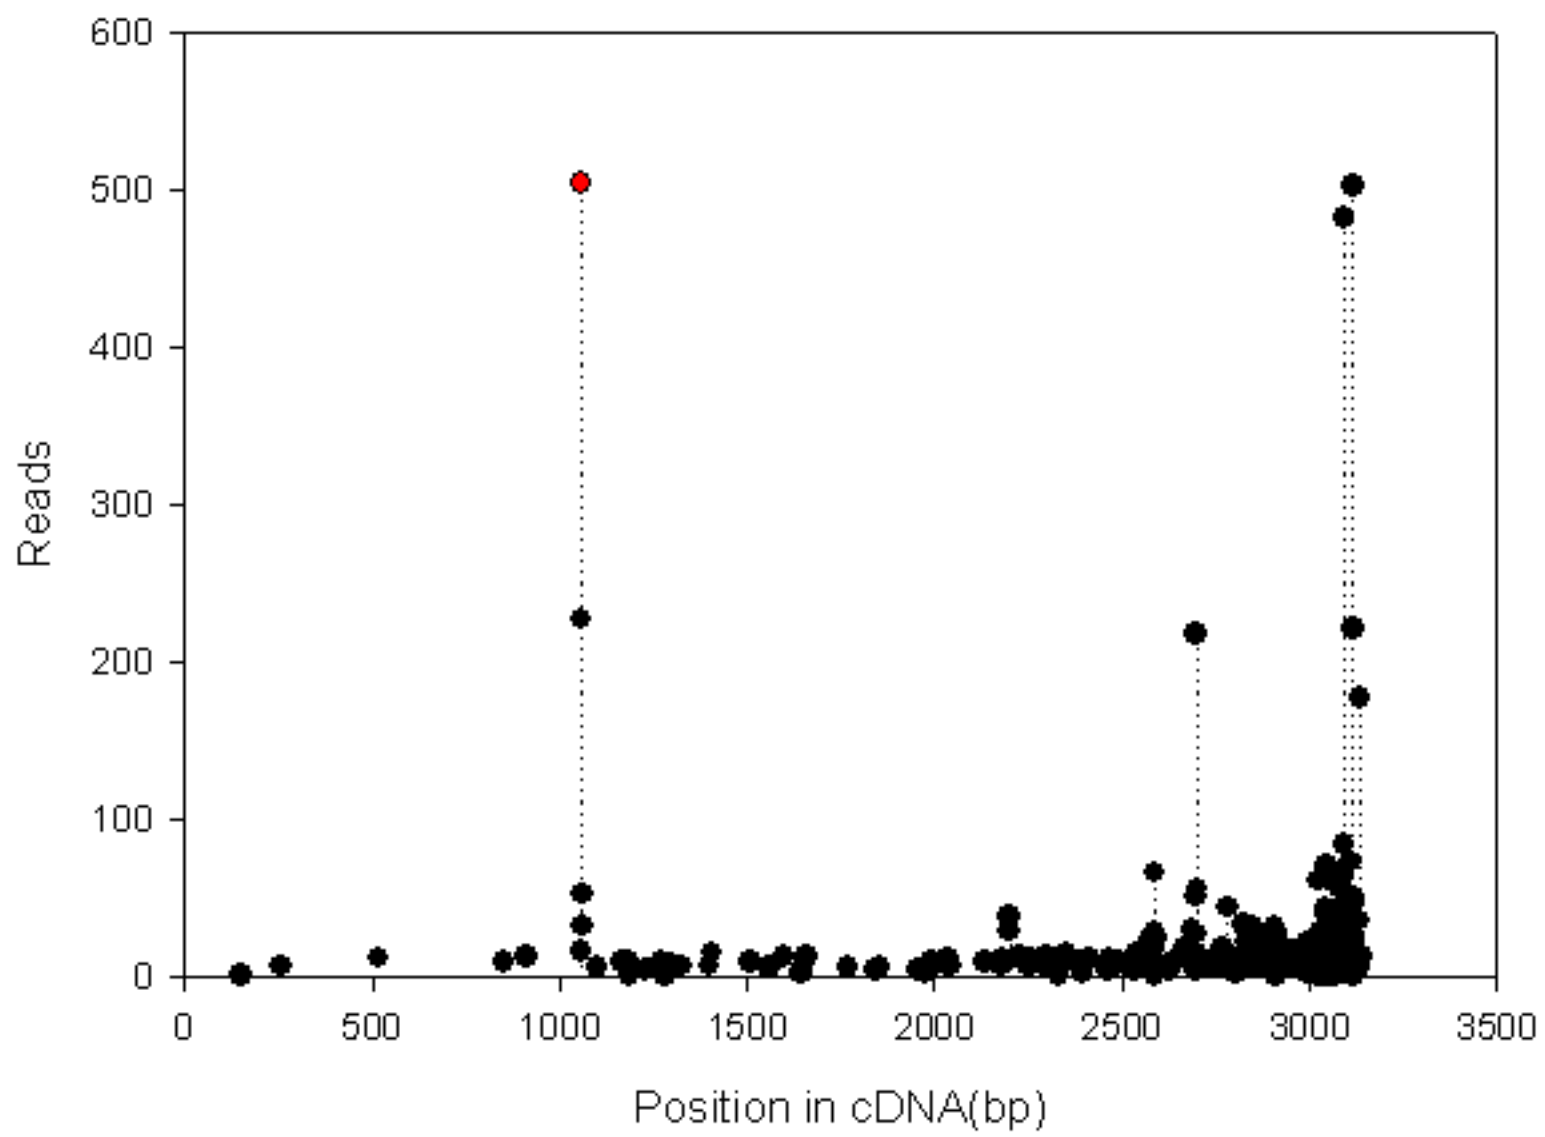

5' AUUGGGAUGAAGCCUGGUCCGGAUUC 3'  
 .....  
 3' CCCCCUACUUCGGACCAGGCU---- 5'

Cs2g09770.1

Csi-miR166a.1

Csi-miR166a.1, target=Cs4g19310.1 gene=Cs4g19310  
 Category:1  
 Score=4  
 Cleavage Site=677

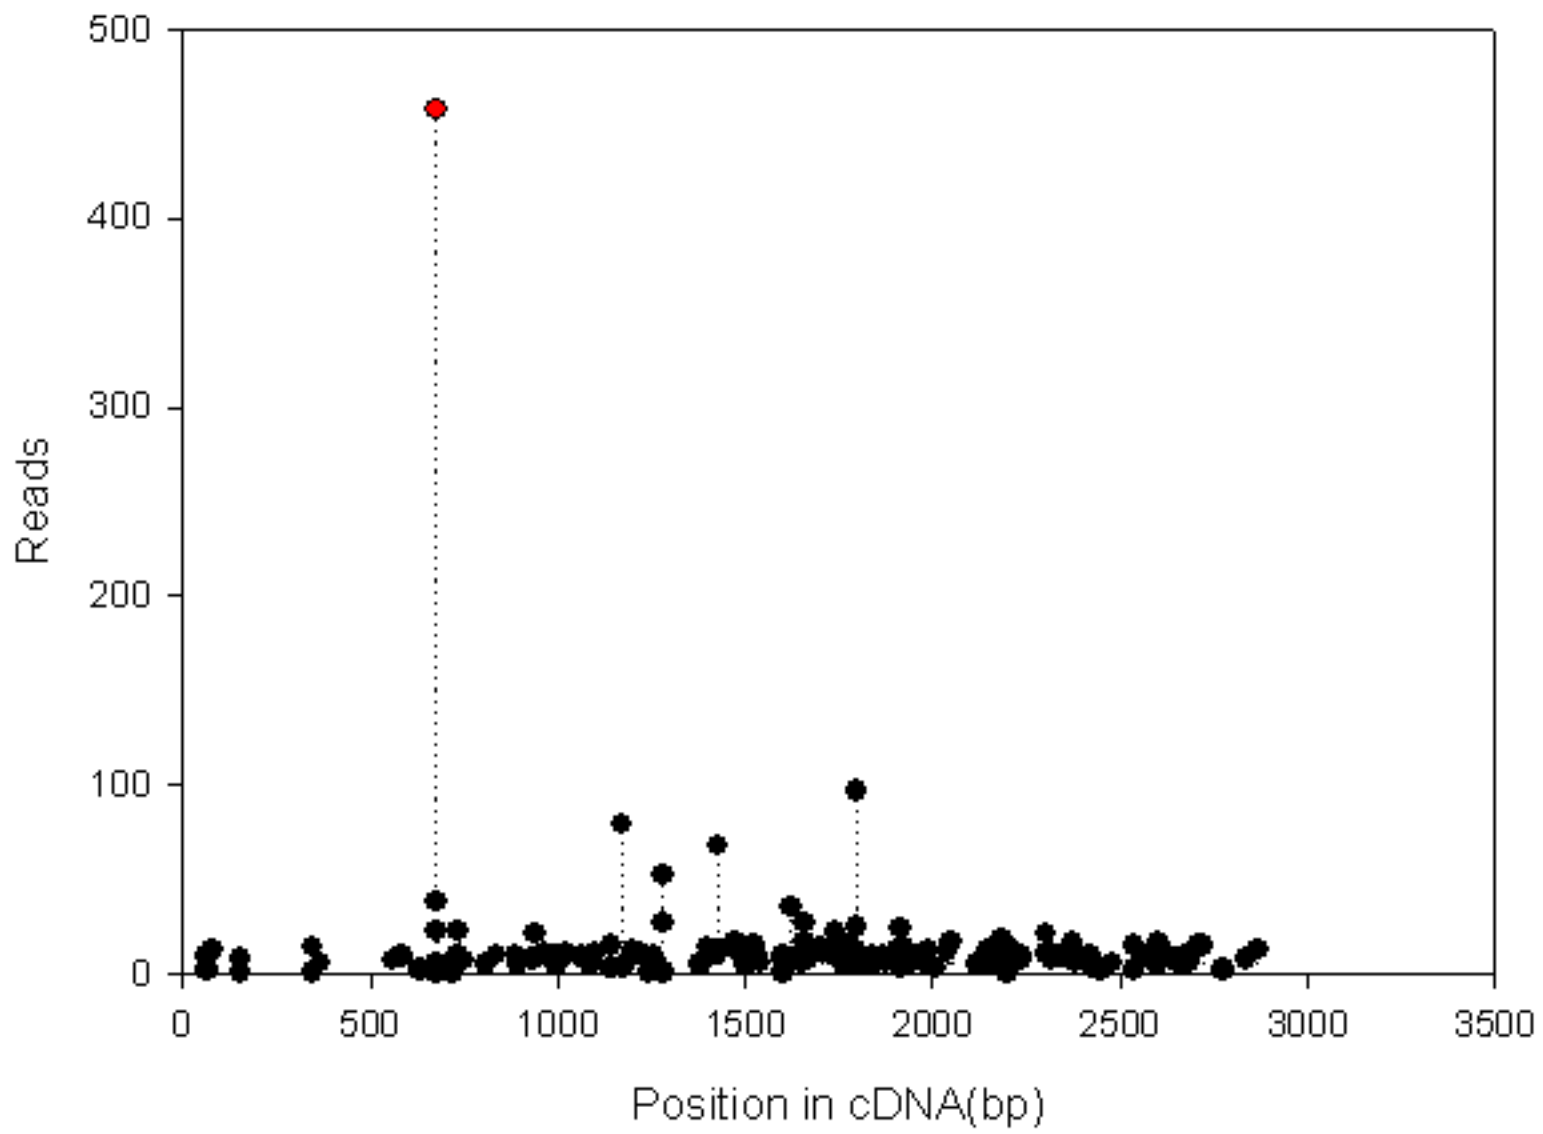

```

5' CCCGGGAUGAAGCCUGGUCCGGAUUC 3'      Cs4g19310.1
   .....
3' CCCCCUACUUCGGACCAGGCU----- 5'     Csi-miR166a.1

```

Csi-miR166a.1, target=Cs8g16510.1 gene=Cs8g16510  
Category:1  
Score=4  
Cleavage Site=1434

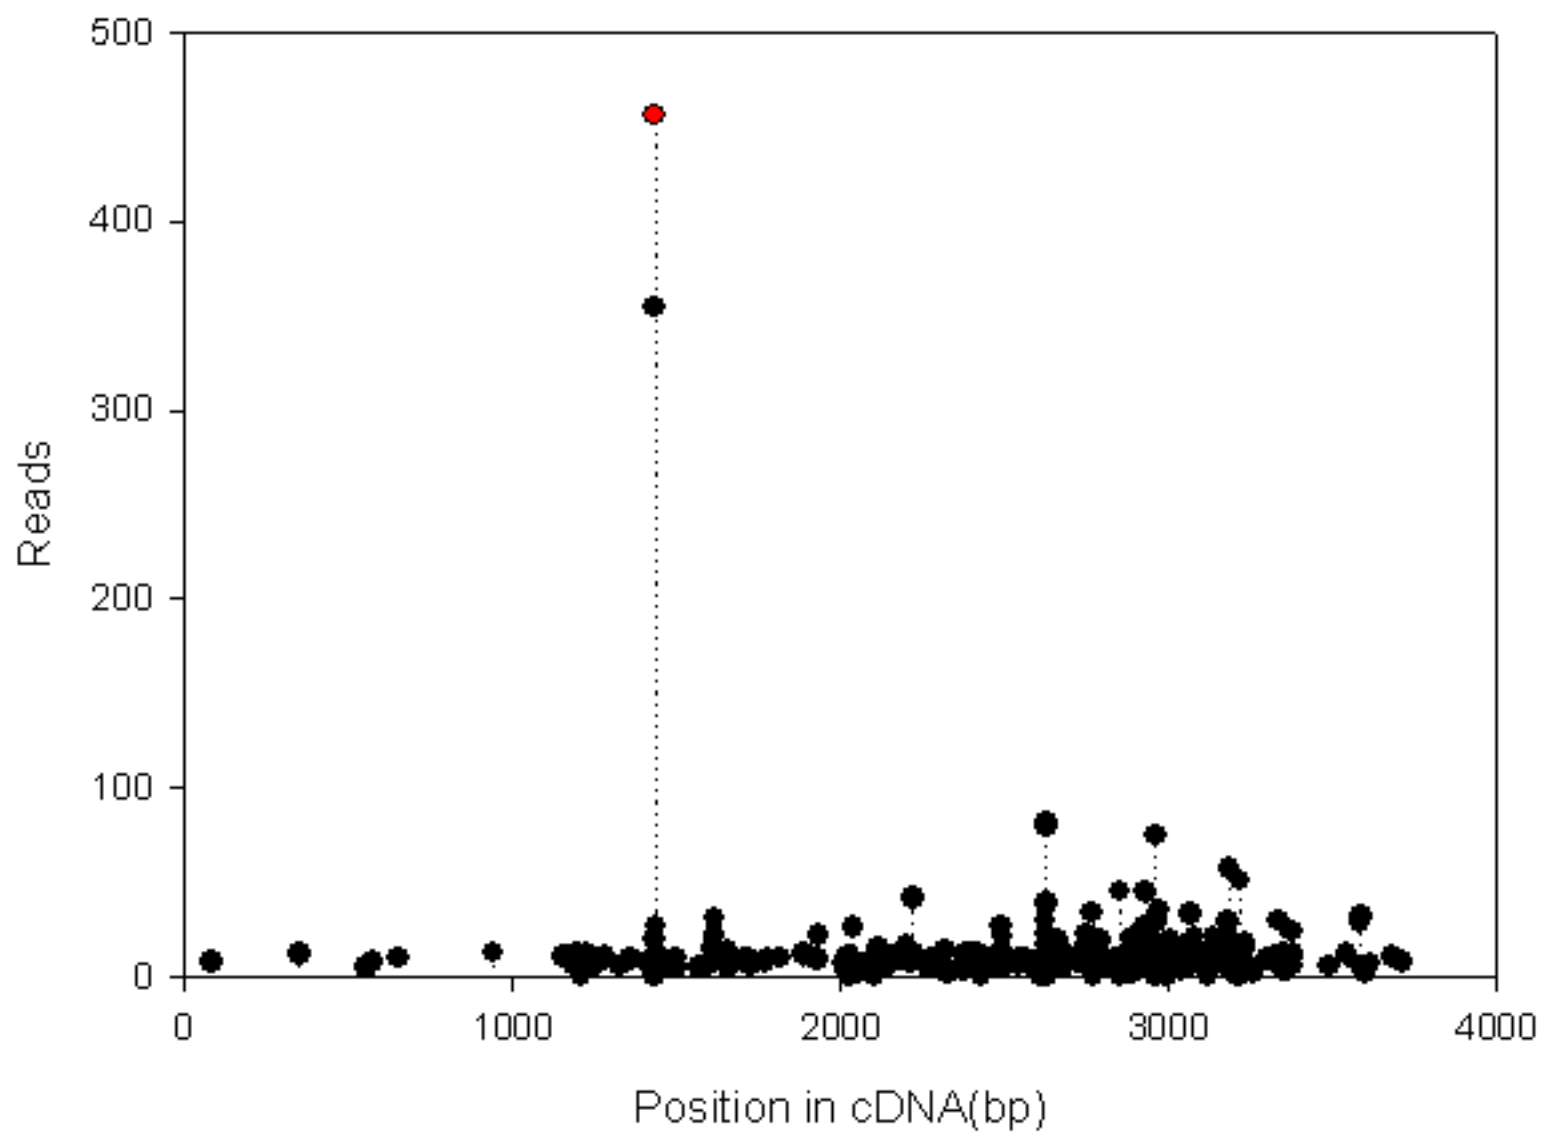

```
5' CCUGGGAUGAAGCCUGGUCCGGAUUC 3' Cs8g16510.1
   ::::::::::::::::::::.
3' CCCCUCUACUUCGGACCAGGCU---- 5' Csi-miR166a.1
```

Csi-miR166a.2, target=Cs1g15640.1 gene=Cs1g15640  
 Category:3  
 Score=2.5  
 Cleavage Site=1781



```

5' CCUGGAAUGAAGCCUGGUCCGGAUUC 3'      Cs1g15640.1
   ::::::::::::::::::::.
3' -CCCUUACUUCGGACCAGGCU---- 5'      Csi-miR166a.2

```



Csi-miR166a.2, target=Cs2g09770.1 gene=Cs2g09770  
 Category:1  
 Score=3  
 Cleavage Site=1058

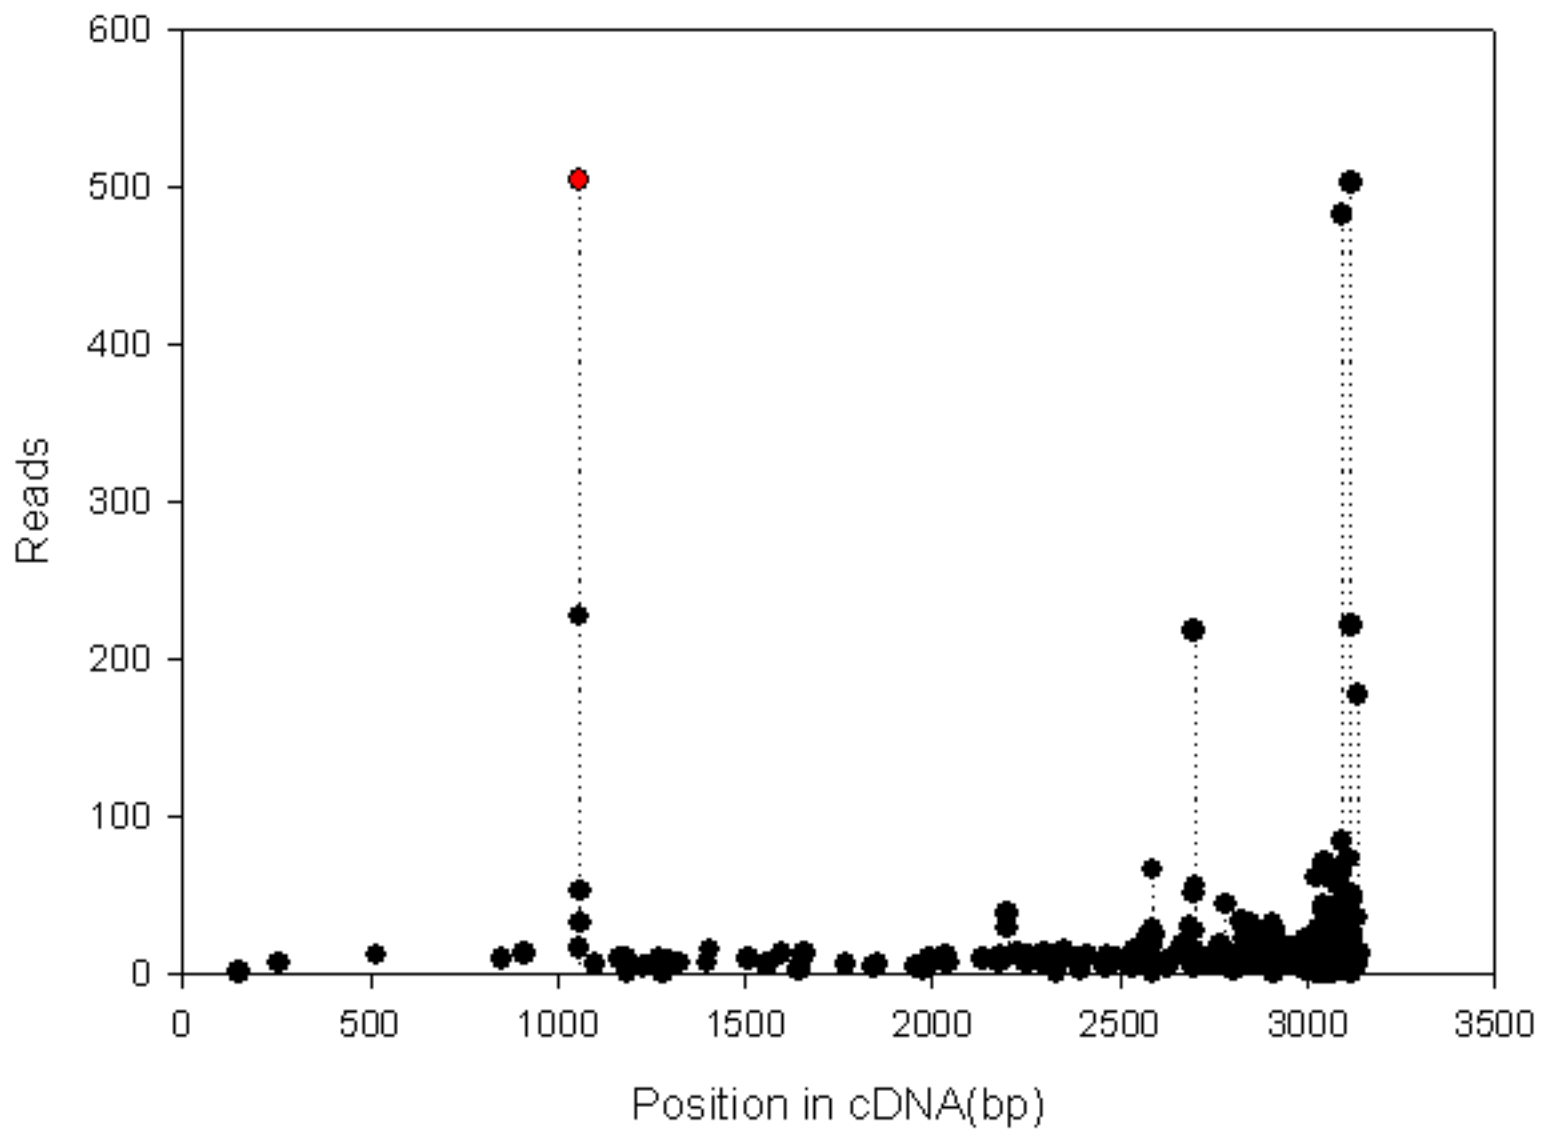

5' AUUGGGAUGAAGCCUGGUCGGAUUC 3'

Cs2g09770.1

:.:.:.:.:.:.:.:.:.:.:.:.:.:.:.:..

3' -CCCCUUACUUCGGACCAGGCU---- 5'

Csi-miR166a.2

Csi-miR166a.2, target=Cs4g19310.4 gene=Cs4g19310  
 Category:1  
 Score=3  
 Cleavage Site=677



```

5'  CCCGGGAUGAAGCCUGGUCGGAUUC  3'          Cs4g19310.1
      ::::::::::::::::::::.
3'  -CCCCUUA CUUCGGACCAGGCU----  5'          Csi-miR166a.2
  
```

Csi-miR166a.2, target=Cs8g16510.1 gene=Cs8g16510  
 Category:1  
 Score=3  
 Cleavage Site=1434

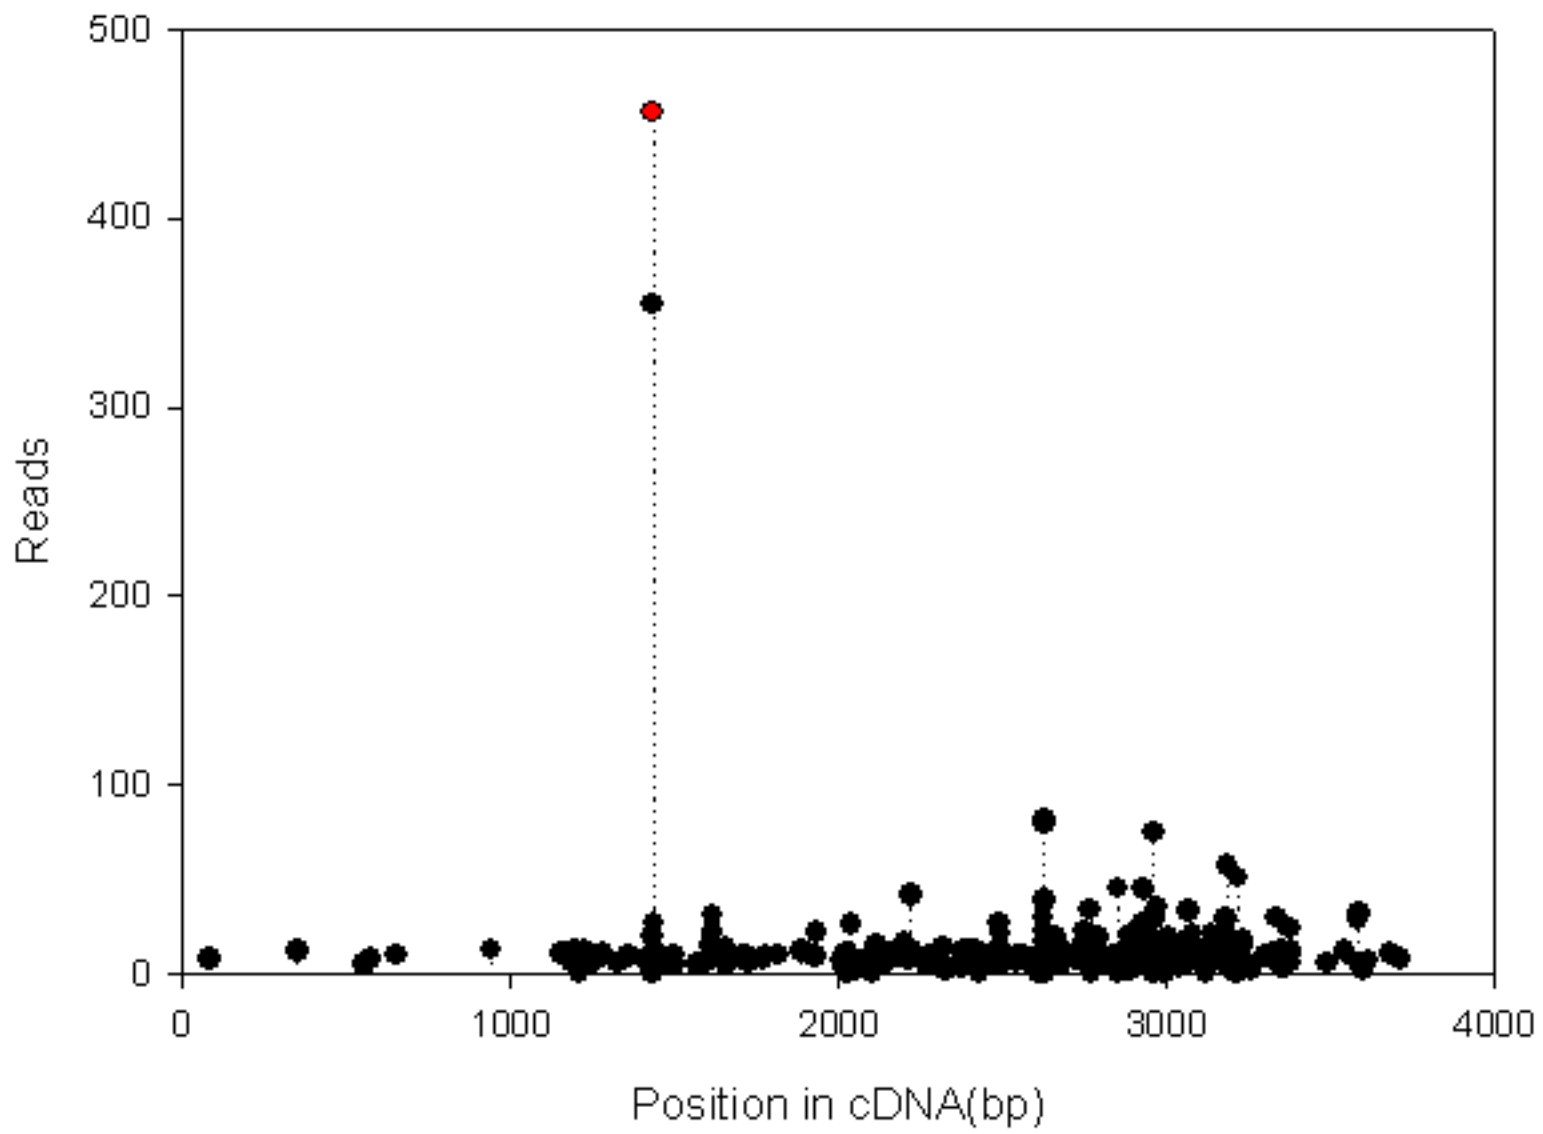

```

5' CCUGGGAUGAAGCCUGGUCCGGAUUC 3'          Cs8g16510.1
   ::::::::::::::::::::
3' -CCCUUACUUCGGACCAGGCU----- 5'        Csi-miR166a.2
  
```

Csi-miR166b, target=Cs1g15640.1 gene=Cs1g15640  
 Category:3  
 Score=2.5  
 Cleavage Site=1781

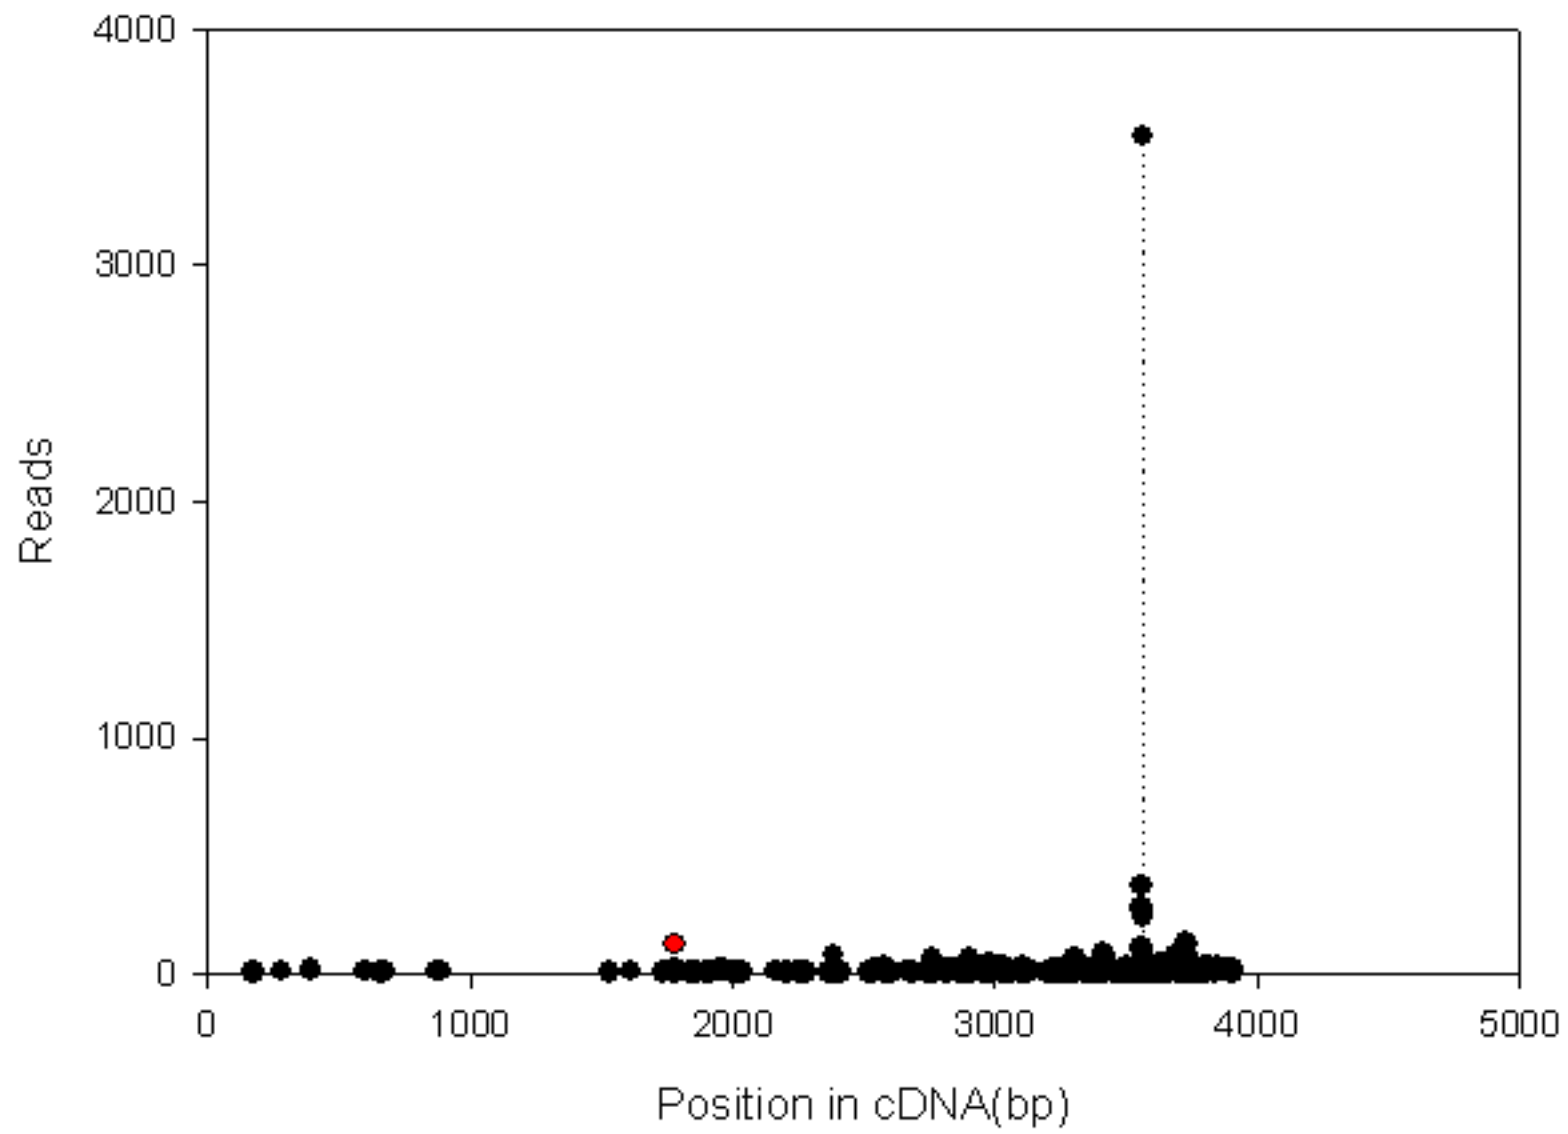

```

5' CCUGGAAUGAAGCCUGGUC CGGAUUC 3'          Cs1g15640.1
   : : : : : : : : : : : : : : : : : :
3' -GCCCUUACUUCGGACCAGGCU----- 5'        Csi-miR166b

```

Csi-miR166b, target=Cs2g09770.1 gene=Cs2g09770  
 Category:1  
 Score=3  
 Cleavage Site=1058

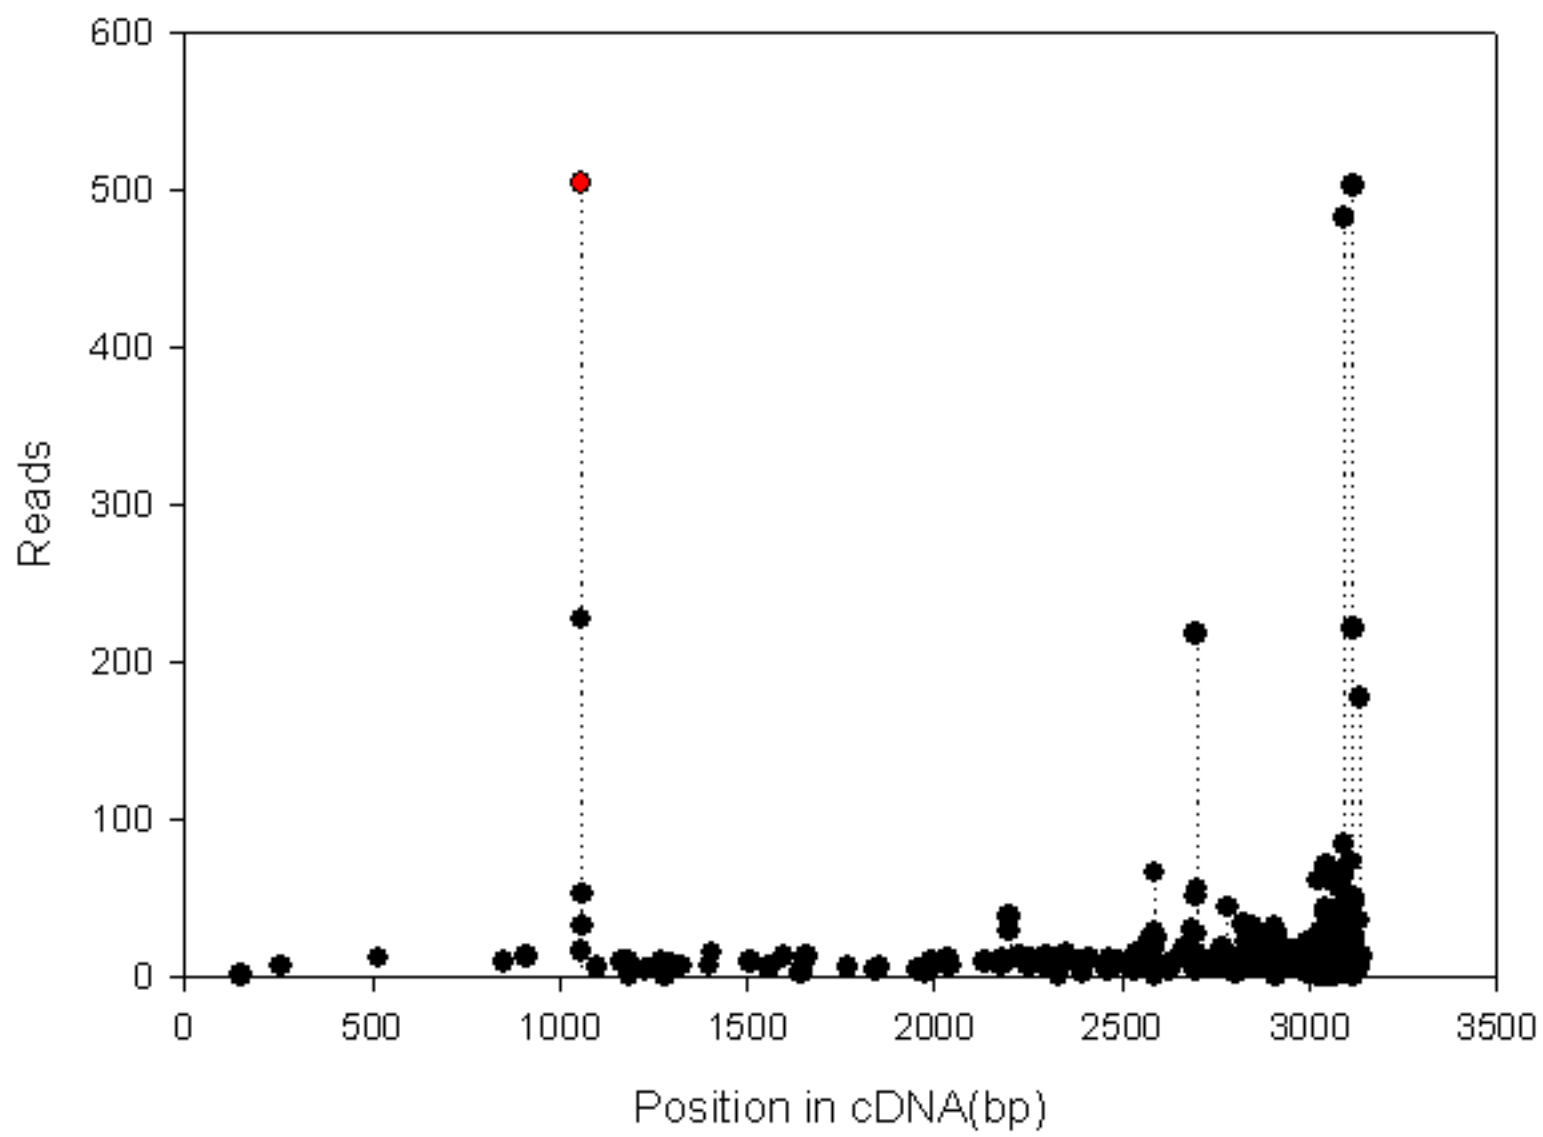

```

5' AUUGGGAUGAAGCCUGGUC CGGAUUC 3'      Cs2g09770.1
   . : : : : : : : : : : : : : : :
3' -GCCCUUACUUCGGACCAGGCU----- 5'      Csi-miR166b

```

Csi-miR166b, target=Cs4g19310.1 gene=Cs4g19310  
 Category:1  
 Score=3  
 Cleavage Site=677

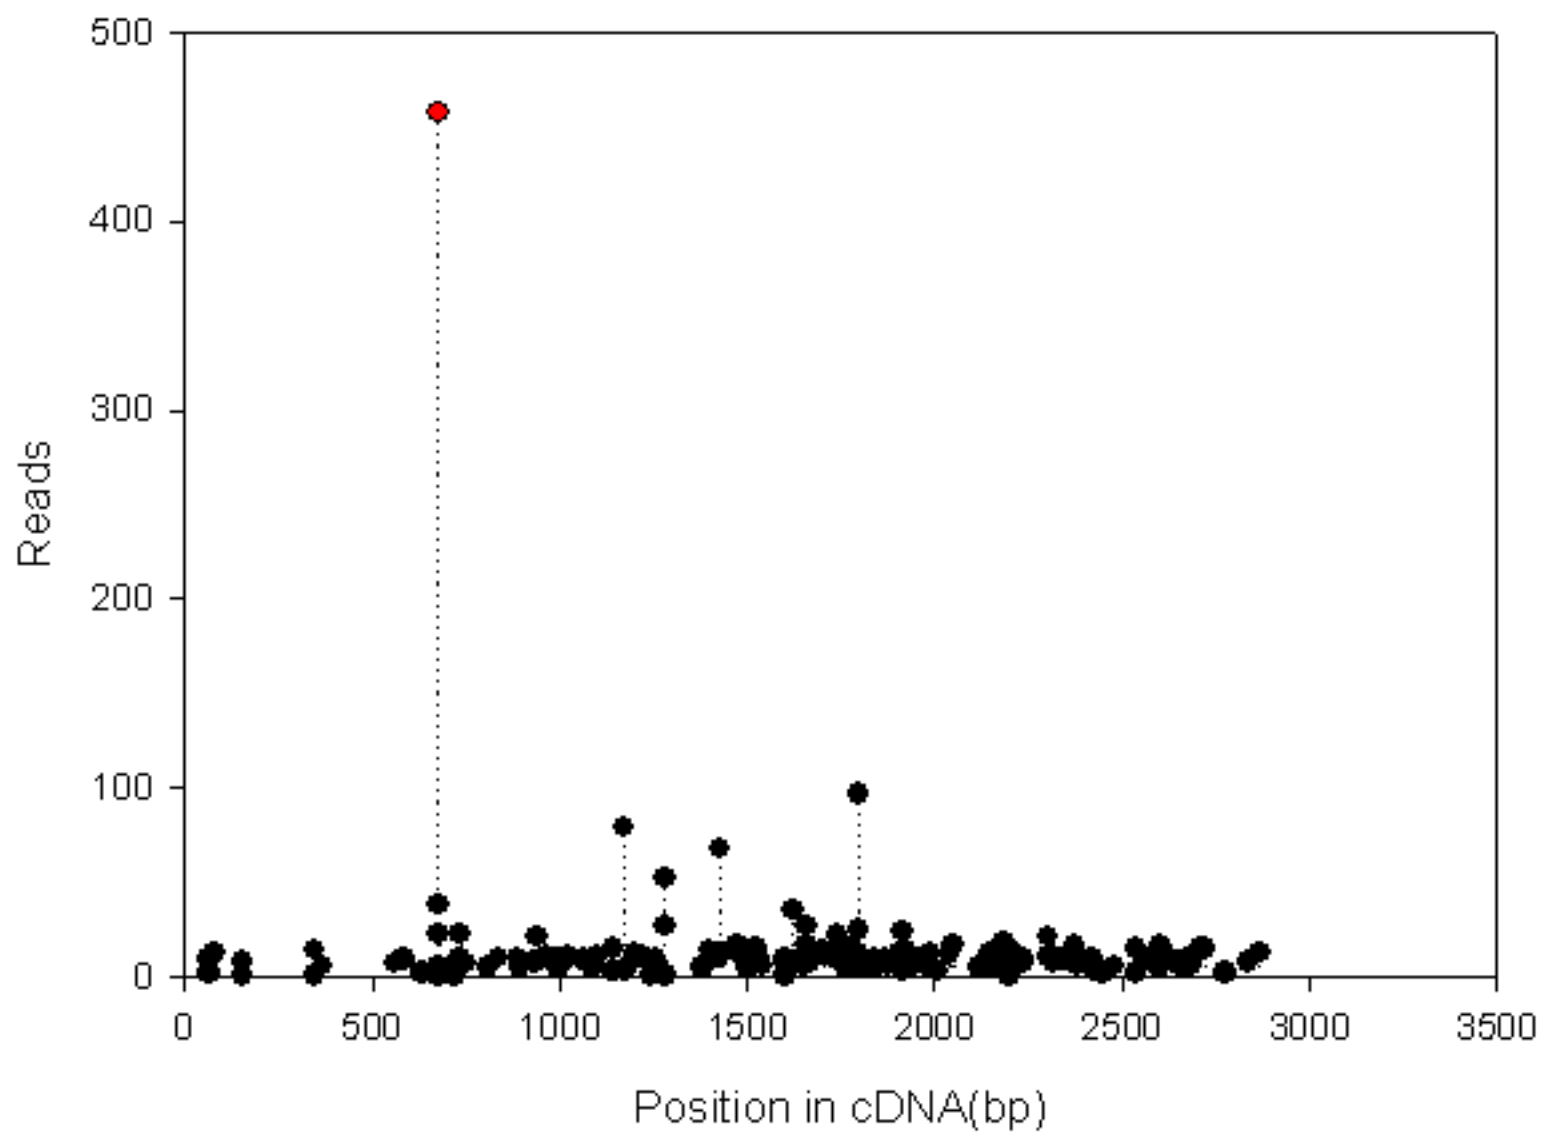

```

5' CCGGGAUGAAGCCUGGUCGGAUUC 3'      Cs4g19310.1
   : : : : : : : : : : : : : : :
3' -GCCCUUACUUCGGACCAGGCU---- 5'     Csi-miR166b

```

Csi-miR166b, target=Cs8g16510.1 gene=Cs8g16510  
 Category:1  
 Score=5  
 Cleavage Site=1434

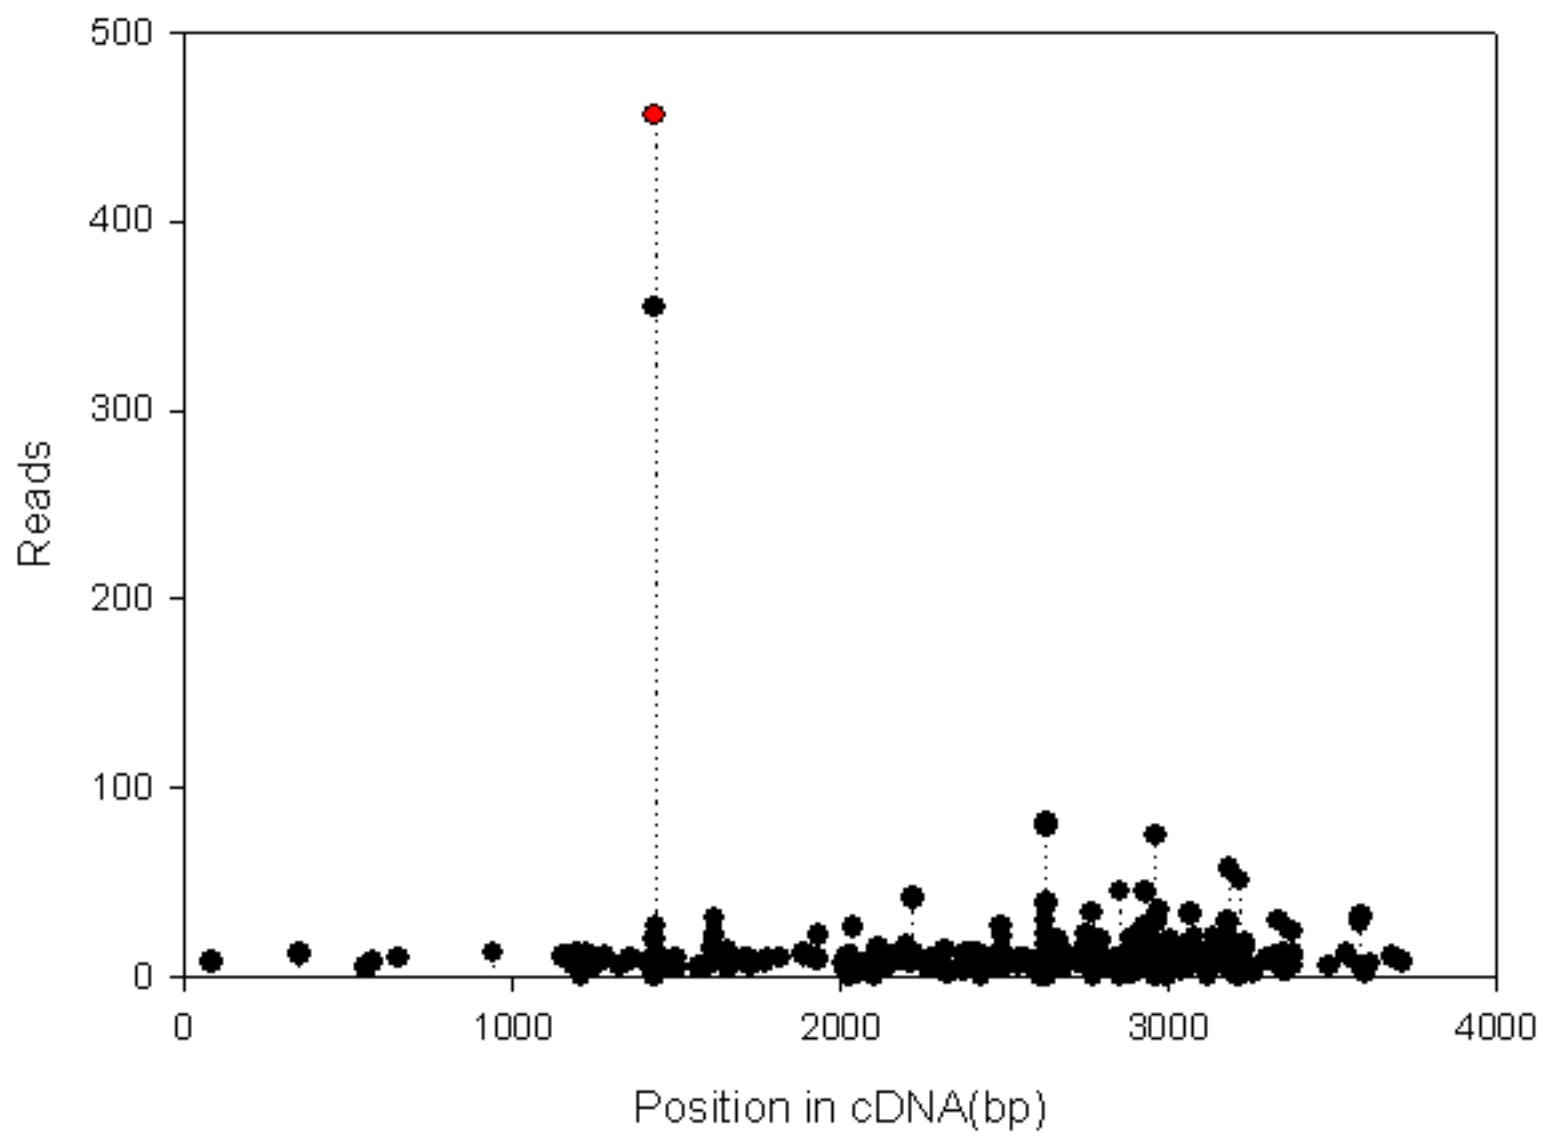

```

5' CCUGGGAUGAAGCCUGGUC CGGAUUC 3'      cs8g16510.1
   : : : : : : : : : : : : : : : :
3' -GCCCUUACUUCGGACCAGGCU---- 5'      Csi-miR166b
  
```

Csi-miR166c.1, target=Cs1g15640.1 gene=Cs1g15640  
 Category:3  
 Score=0.5  
 Cleavage Site=1781



```

5' CCUGGAAUGAAGCCUGGUC CGGAUUC 3'      Cs1g15640.1
   ::::::::::::::::::::
3' ---CCUUACUUCGGACCAGGCU---- 5'      Csi-miR166c.1

```



Csi-miR166c.1, target=Cs2g09770.1 gene=Cs2g09770  
 Category:1  
 Score=1  
 Cleavage Site=1058



```

5' AUUGGGAUGAAGCCUGGUCGGAUUC 3'          Cs2g09770.1
   :.:.:.:.:.:.:.:.:.:.:.:.:.:.:.:
3' ---CCUUACUUCGGACCAGGCU----- 5'      Csi-miR166c.1

```

Csi-miR166c.1, target=Cs4g19310.1 gene=Cs4g19310  
 Category:1  
 Score=1  
 Cleavage Site=677



```

5' CCCGGGAUGAAGCCUGGUC CGGAUUC 3'          Cs4g19310.1
   ::::::::::::::::::::.
3' ---CCUUACUUCGGACCAGGCU---- 5'          Csi-miR166c.1
  
```

Csi-miR166c.1, target=Cs8g16510.1 gene=Cs8g16510  
 Category:1  
 Score=1  
 Cleavage Site=1434



|    |                           |    |               |
|----|---------------------------|----|---------------|
| 5' | CCUGGGAUGAAGCCUGGUCGGAUUC | 3' | Cs8g16510.1   |
|    | ::::::::::::::::::        |    |               |
| 3' | ---CCUUACUUCGGACCAGGCU--- | 5' | Csi-miR166c.1 |

Csi-miR166c.2, target=Cs1g15640.1 gene=Cs1g15640  
 Category:3  
 Score=0.5  
 Cleavage Site=1781



|    |                            |    |               |
|----|----------------------------|----|---------------|
| 5' | CCUGGAAUGAAGCCUGGUCCGGAUUC | 3' | Cs1g15640.1   |
|    | .....                      |    |               |
| 3' | ----CUUACUUCGGACCAGGCU---- | 5' | Csi-miR166c.2 |

Csi-miR166c.2, target=Cs2g09770.1 gene=Cs2g09770  
 Category:1  
 Score=1  
 Cleavage Site=1058



5' AUUGGGAUGAAGCCUGGUCGGAUUC 3'  
 :.:.:.:.:.:.:.:.:.:.:  
 3' ----CUUACUUCGGACCAGGCU---- 5'

Cs2g09770.1  
 Csi-miR166c.2

Csi-miR166c.2, target=Cs4g06030.1 gene=Cs4g06030  
 Category:3  
 Score=4.5  
 Cleavage Site=2044

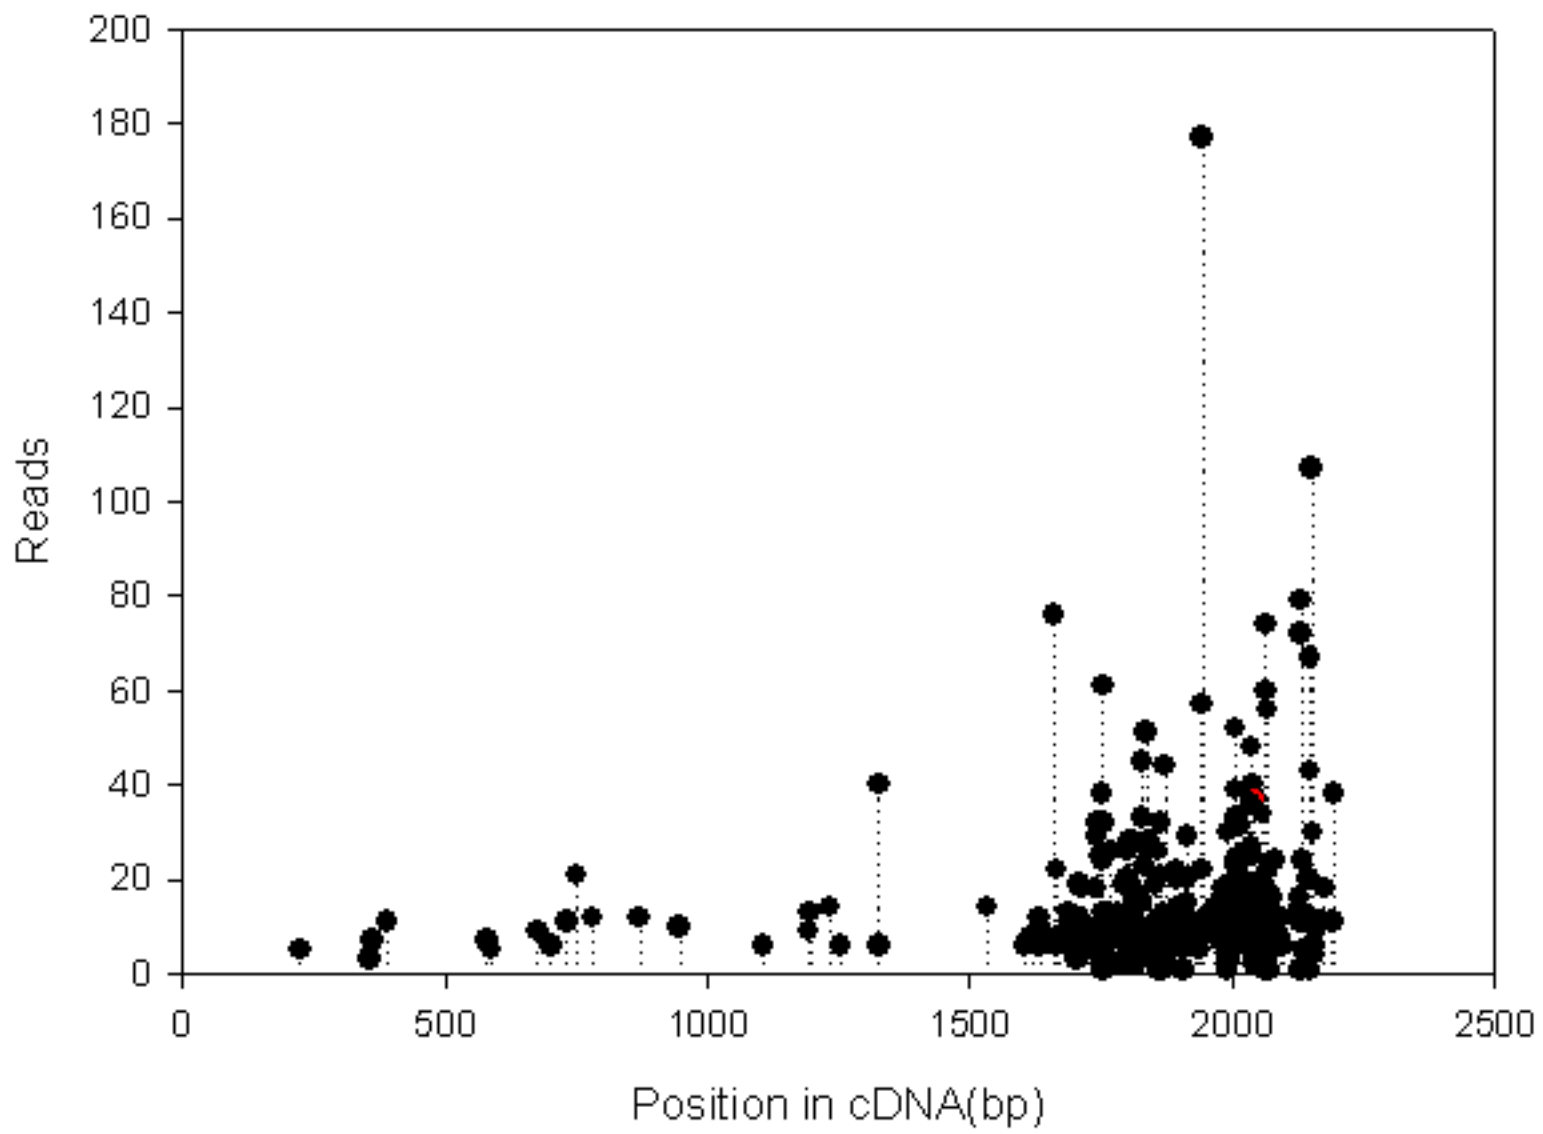

```

5' AGGCUGAAU-AAGCCUGUUCUGGGUUG 3'      Cs4g06030.1
      :   :   :   :   :   :   :   :   :
3' -----CUUACUUCGGACCAGGCU----- 5'    Csi-miR166c.2
  
```

Csi-miR166c.2, target=Cs4g19310.1 gene=Cs4g19310  
 Category:1  
 Score=1  
 Cleavage Site=677



```

5' CCCGGGAUGAAGCCUGGUC CGGAUUC 3'      Cs4g19310.1
      ::::::::::::::::::::
3' ----CUUACUUCGGACCAGGCU---- 5'      Csi-miR166c.2
  
```

Csi-miR166c.2, target=Cs8g16510.1 gene=Cs8g16510  
 Category:1  
 Score=1  
 Cleavage Site=1434

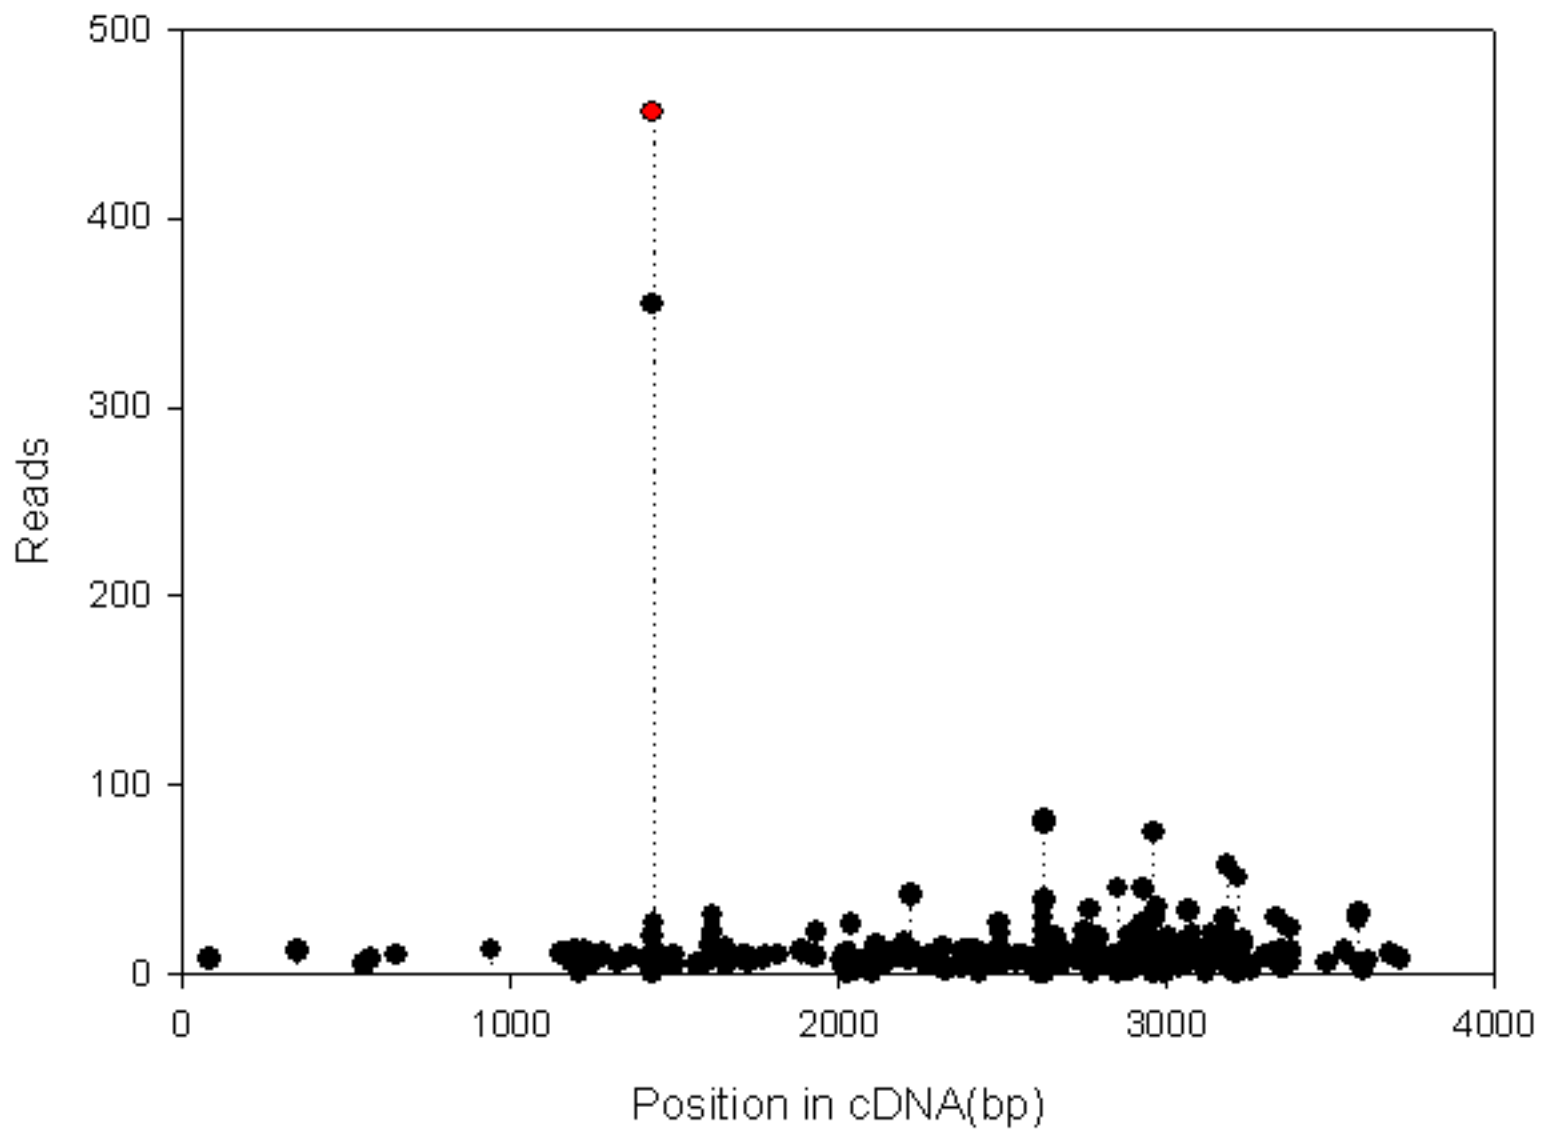

```

5' CCUGGGAUGAAGCCUGGUCGGAUUC 3'      Cs8g16510.1
   ::::::::::::::::::::.
3' ----CUUACUUCGGACCAGGCU---- 5'      Csi-miR166c.2
  
```



Csi-miR166c.3, target=Cs1g15640.1 gene=Cs1g15640  
 Category:3  
 Score=1.5  
 Cleavage Site=1781

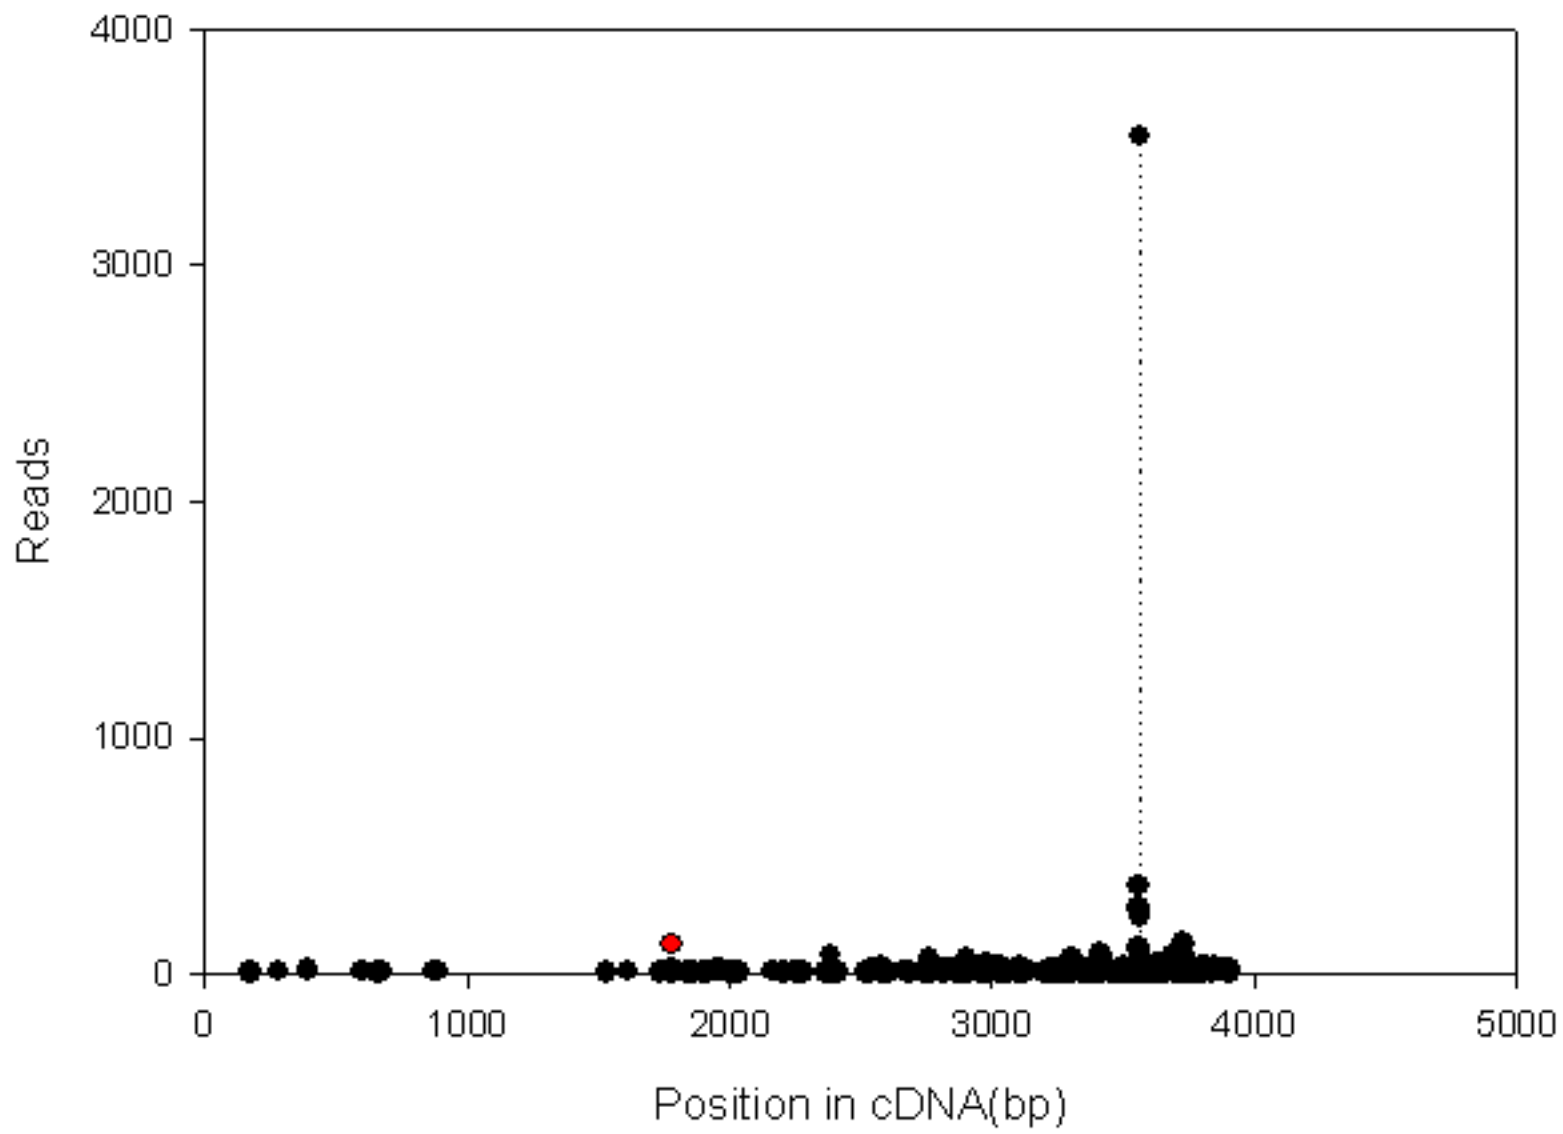

|    |                                 |    |               |
|----|---------------------------------|----|---------------|
| 5' | CCUGGAAUGAAGCCUGGUCGGAUUC       | 3' | Cs1g15640.1   |
|    | : : : : : : : : : : : : : : : . |    |               |
| 3' | --CCCUUACUUCGGACCAGGCU----      | 5' | Csi-miR166c.3 |

Csi-miR166c.3, target=Cs2g09770.1 gene=Cs2g09770  
 Category:1  
 Score=2  
 Cleavage Site=1058



```

5' AUUGGGAUGAAGCCUGGUC CGGAUUC 3'      Cs2g09770.1
   .....
3' --CCCUUACUUCGGACCAGGCU---- 5'      Csi-miR166c.3
  
```

Csi-miR166c.3, target=Cs4g19310.1 gene=Cs4g19310

Category:1

Score=2

Cleavage Site=677

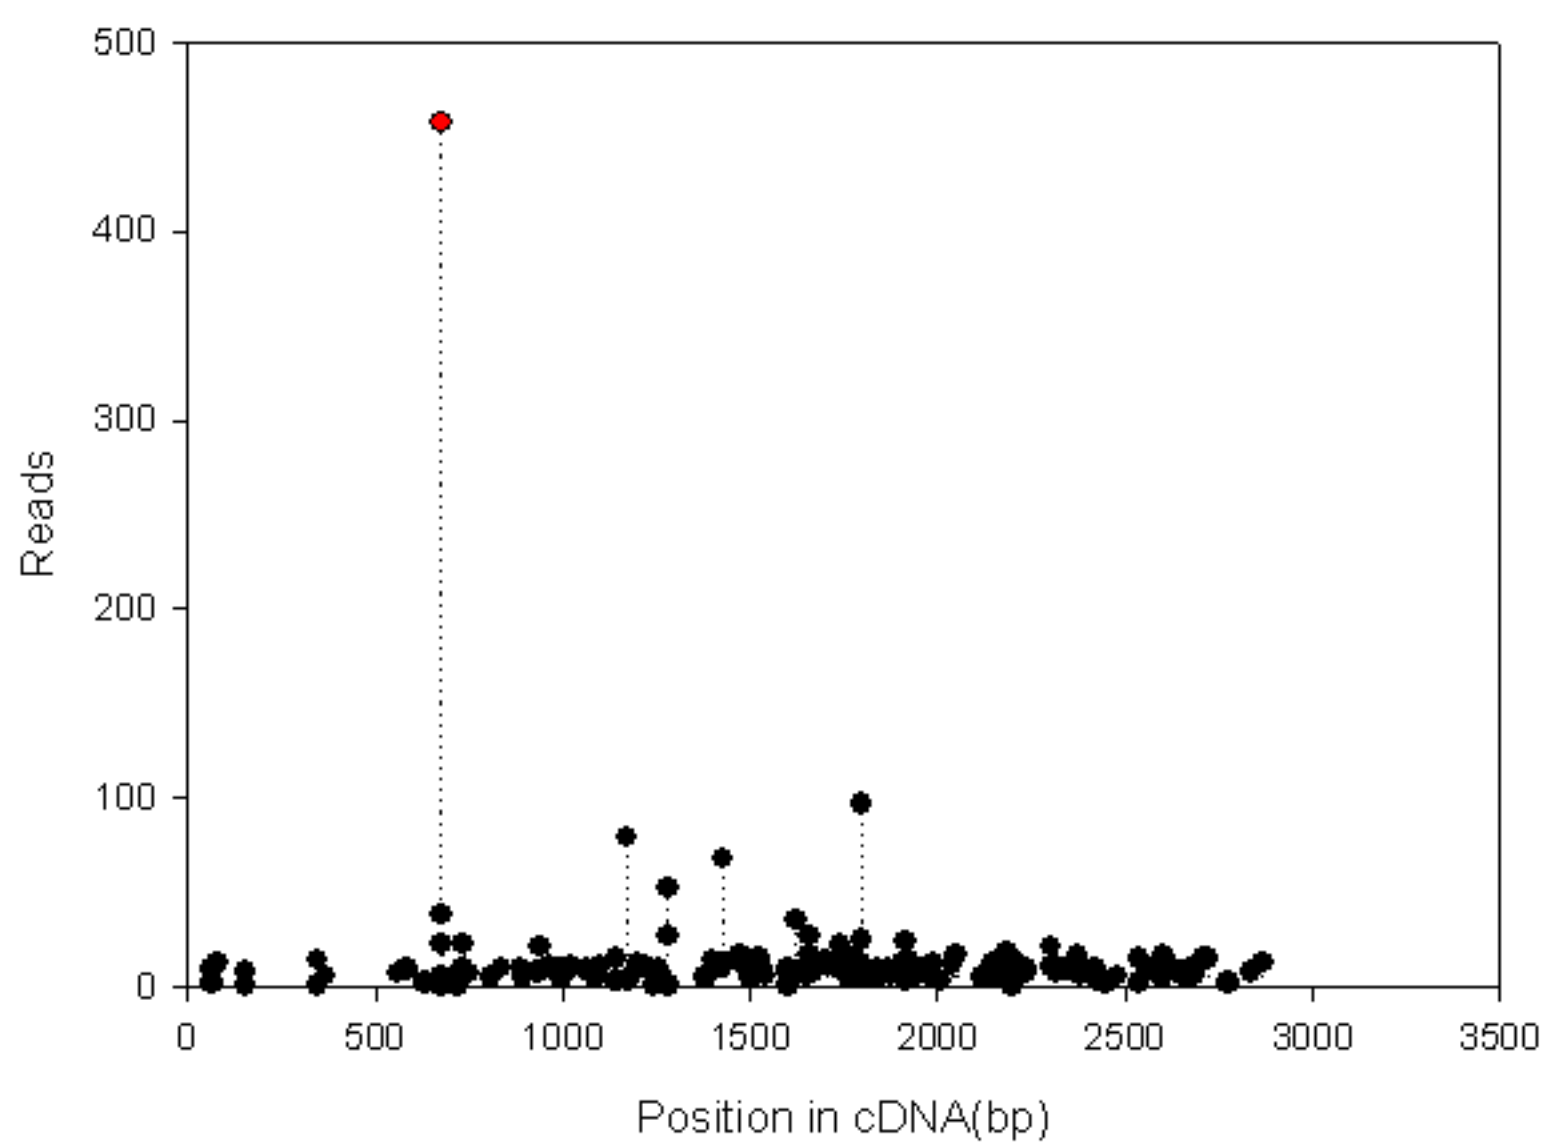

5' CCCGGGAUGAAGCCUGGUC CGGAUUC 3'

Cs4g19310.1

.....

3' --CCCUUACUUCGGACCAGGCU---- 5'

Csi-miR166c.3

Csi-miR166c.3, target=Cs8g16510.1 gene=Cs8g16510  
 Category:1  
 Score=2  
 Cleavage Site=1434



```

5' CCUGGGAUGAAGCCUGGUC CGGAUUC 3'      Cs8g16510.1
   ::::::::::::::::::::
3' --CCCUUACUUCGGACCAGGCU---- 5'      Csi-miR166c.3

```

Csi-miR166c.4, target=Cs1g15640.1 gene=Cs1g15640  
 Category:3  
 Score=3  
 Cleavage Site=1781



```

5' CCUGGAAUGAAGCCUGGUCGGAUUC 3'          Cs1g15640.1
   ::::::::::::::::::::.
3' --CCCUUACUUCGGACCAGGCUC--- 5'          Csi-miR166c.4

```

Csi-miR166c.4, target=Cs2g09770.1 gene=Cs2g09770  
 Category:1  
 Score=3.5  
 Cleavage Site=1058



```

5' AUUGGGAUGAAGCCUGGUCGGAUUC 3'      Cs2g09770.1
   : : : : : : : : : : : : : : : :
3' --CCCUUACUUCGGACCAGGCUC--- 5'      Csi-miR166c.4

```

Csi-miR166c.4, target=Cs4g19310.1 gene=Cs4g19310  
 Category:1  
 Score=3.5  
 Cleavage Site=677



```

5' CCGGGAUGAAGCCUGGUC CGGAUUC 3'      Cs4g19310.1
   ::::::::::::::::::::.
3' --CCCUUACUUCGGACCAGGCUC--- 5'      Csi-miR166c.4

```

Csi-miR166c.4, target=Cs8g16510.1 gene=Cs8g16510  
 Category:1  
 Score=3.5  
 Cleavage Site=1434

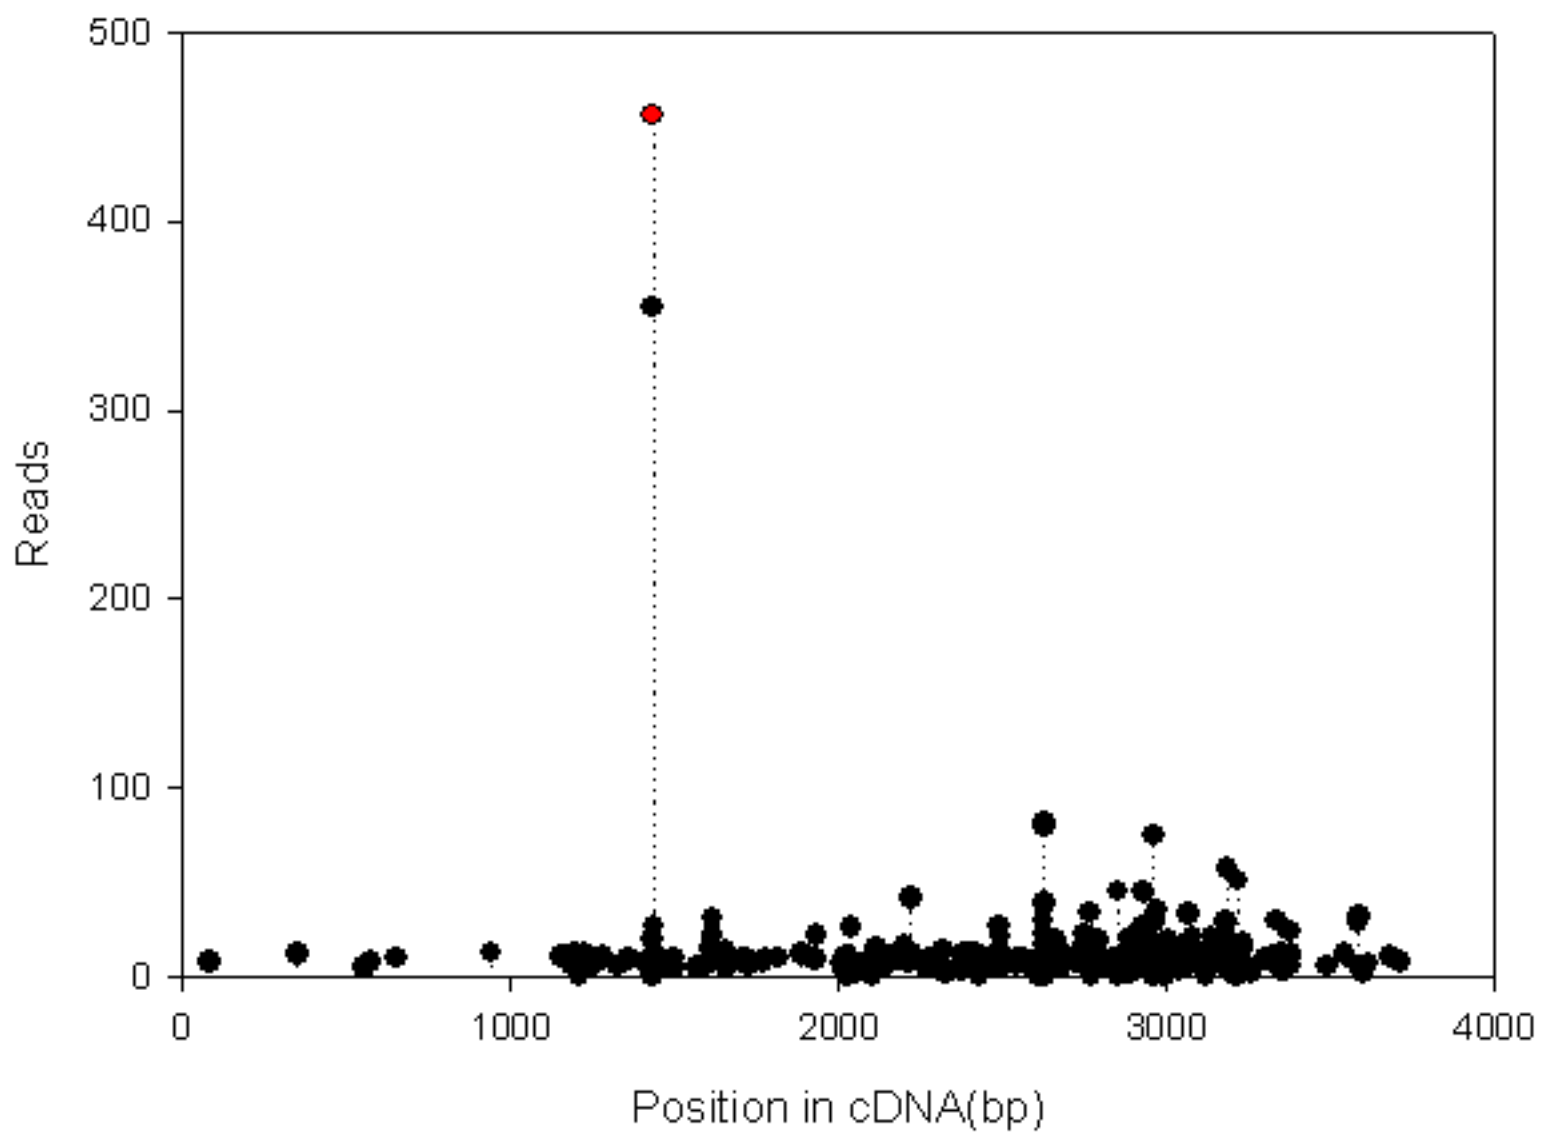

```

5' CCUGGGAUGAAGCCUGGUCGGAUUC 3'          Cs8g16510.1
   ::::::::::::::::::::
3' --CCCUUACUUCGGACCAGGCUC--- 5'          Csi-miR166c.4
  
```



Csi-miR166c.5, target=Cs1g15640.1 gene=Cs1g15640  
 Category:3  
 Score=2  
 Cleavage Site=1781



```

5' CCUGGAAUGAAGCCUGGUC CGGAUUC 3'      Cs1g15640.1
   ::::::::::::::::::::
3' ---CCUACUUCGGACCAGGCUC--- 5'      Csi-miR166c.5
  
```

Csi-miR166c.5, target=Cs2g09770.1 gene=Cs2g09770  
 Category:1  
 Score=2.5  
 Cleavage Site=1058



```

5' AUUGGGAUGAAGCCUGGUC CGGAUUC 3'
   ::::::::::::::::::::
3' ---CCUUA CUUCGGACCAGGCUC--- 5'
  
```

Cs2g09770.1

Csi-miR166c.5

Csi-miR166c.5, target=Cs4g19310.1 gene=Cs4g19310  
 Category:1  
 Score=2.5  
 Cleavage Site=677



```

5' CCCGGGAUGAAGCCUGGUCCGGAUUC 3'          Cs4g19310.1
   .....
3' ---CCUACUUCGGACCAGGCUC--- 5'          Csi-miR166c.5
  
```

Csi-miR166c.5, target=Cs8g16510.1 gene=Cs8g16510  
 Category:1  
 Score=2.5  
 Cleavage Site=1434



```

5' CCUGGGAUGAAGCCUGGUCGGAUUC 3'      Cs8g16510.1
   ::::::::::::::::::::.
3' ---CCUACUUCGGACCAGGCUC--- 5'      Csi-miR166c.5

```

Csi-miR166d.1, target=Cs1g15640.1 gene=Cs1g15640  
 Category:3  
 Score=3.5  
 Cleavage Site=1781

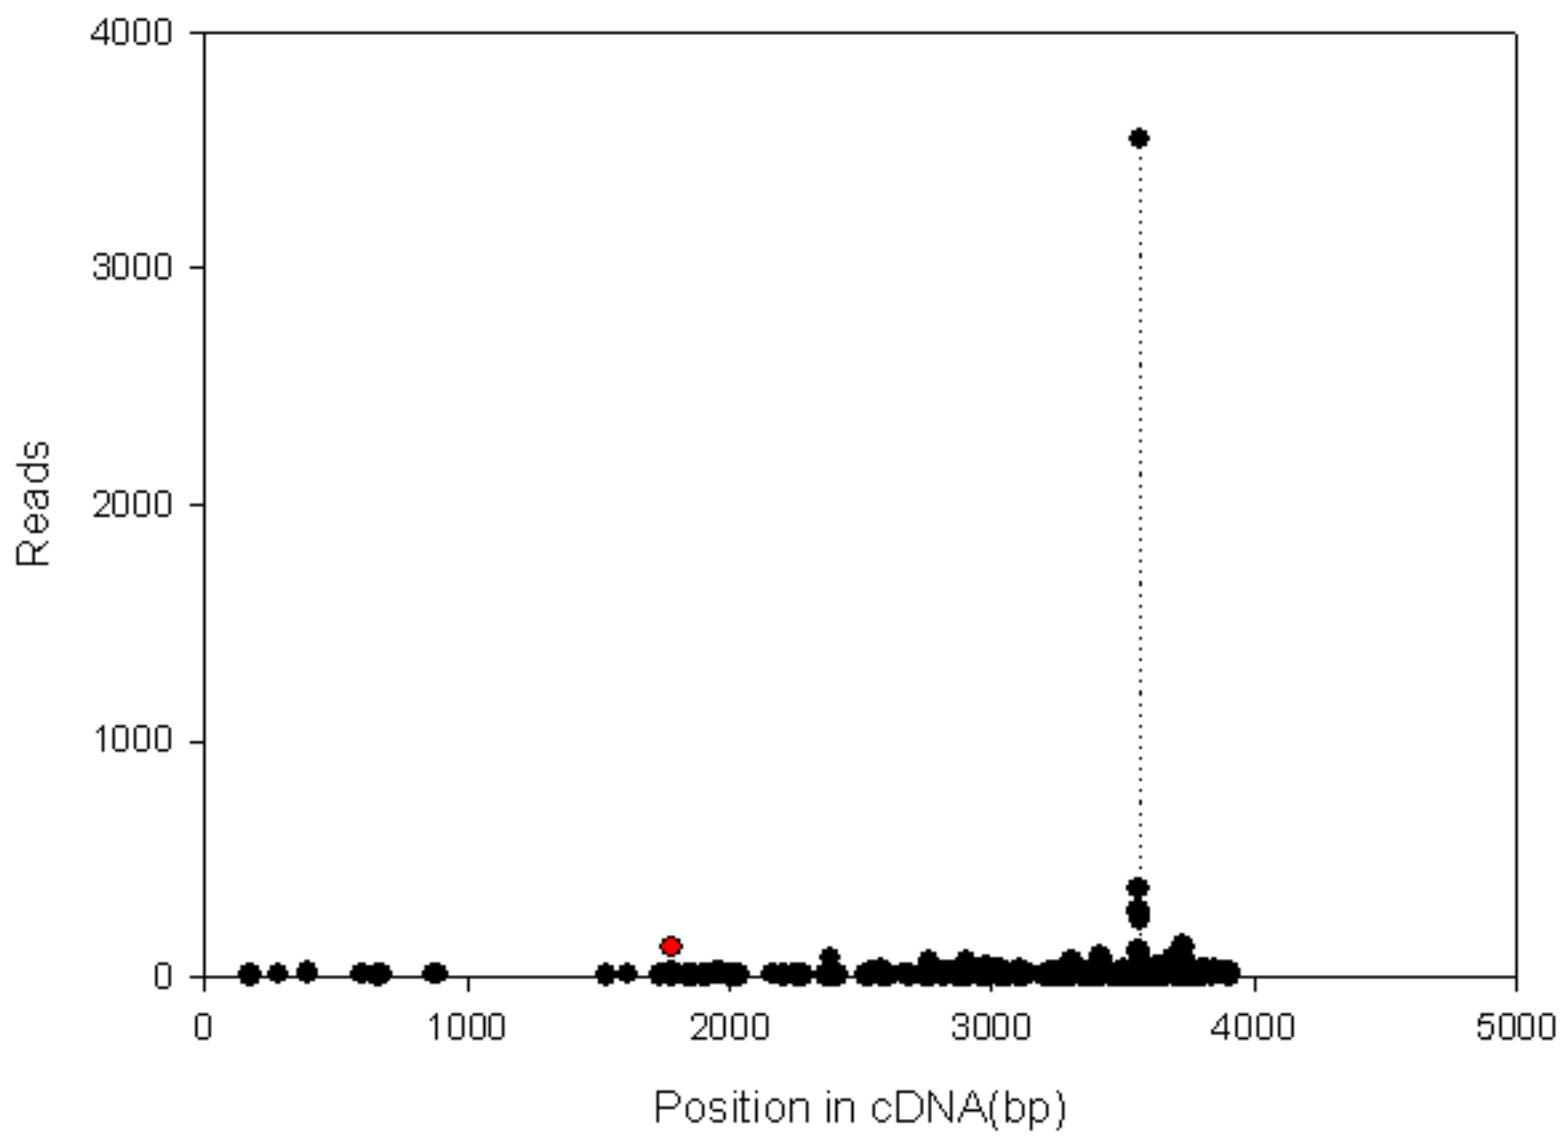

```

5' CCUGGAAUGAAGCCUGGUCCGGAUUC 3'          Cs1g15640.1
   : : : : : : : : : : : : : : : :
3' UUCCCUUACUUCGGACCAGGCU---- 5'          Csi-miR166d.1
  
```

Csi-miR166d.1, target=Cs2g09770.1 gene=Cs2g09770  
Category:1  
Score=3  
Cleavage Site=1058

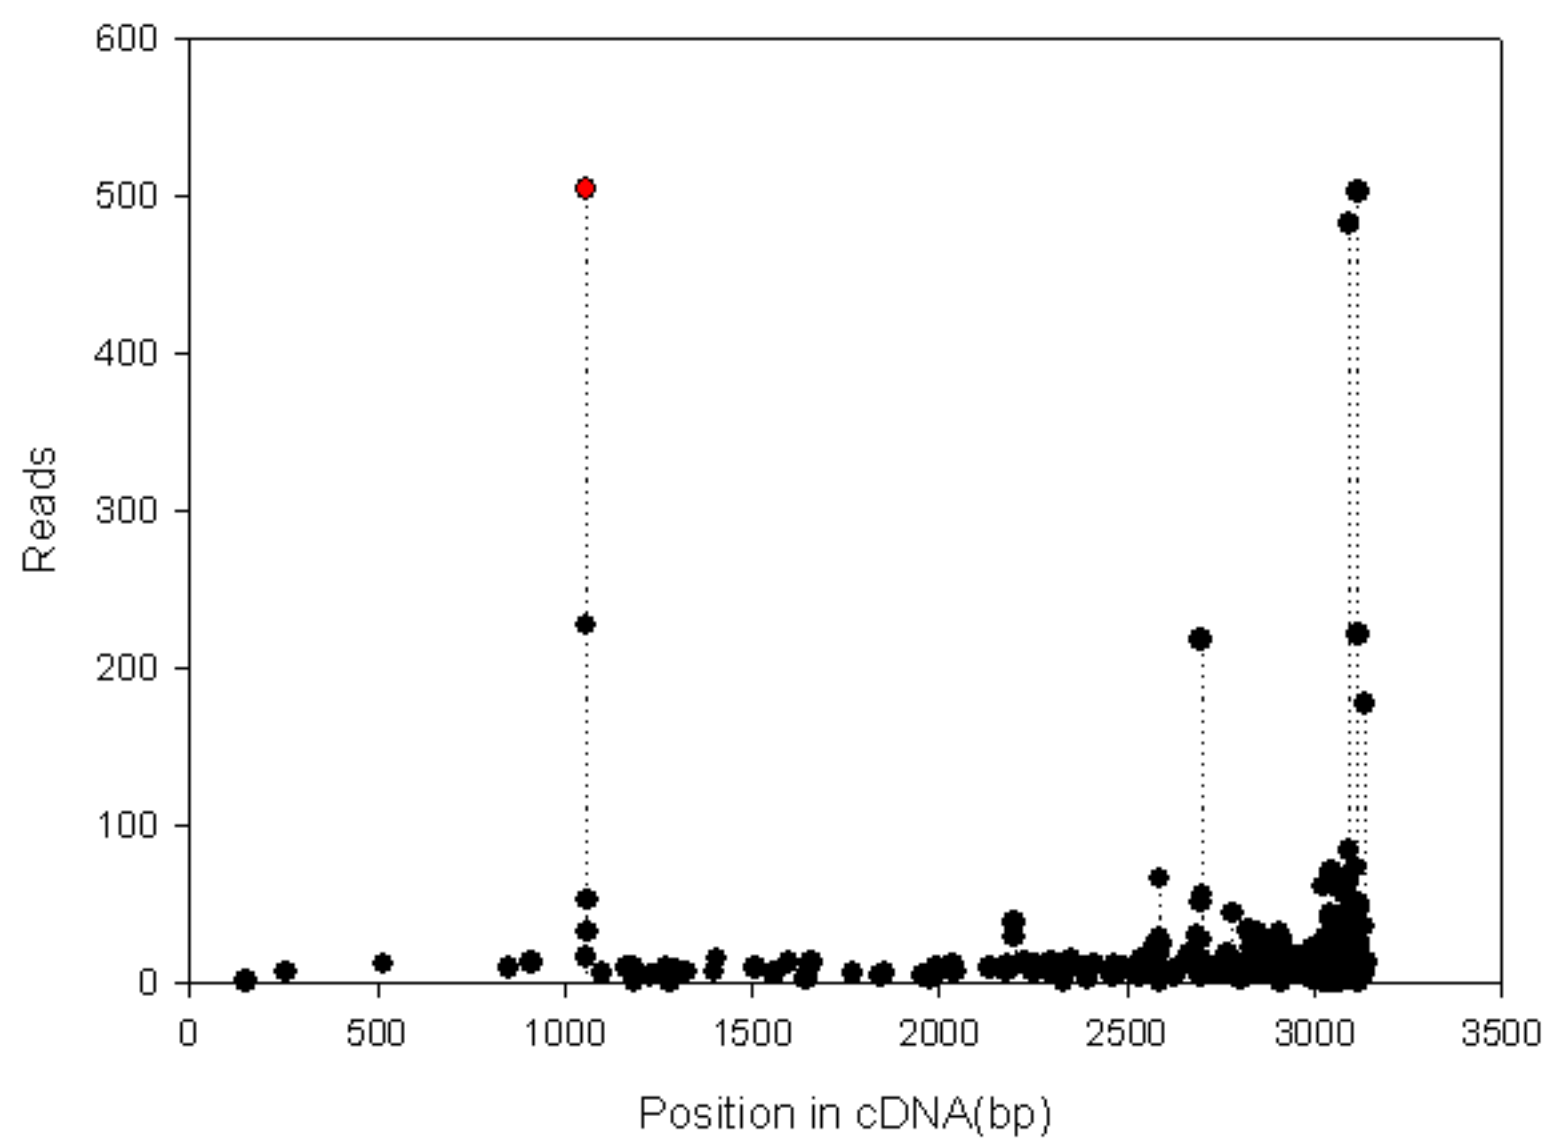

|                                  |               |
|----------------------------------|---------------|
| 5' AUUGGGAUGAAGCCUGGUCCGGAUUC 3' | Cs2g09770.1   |
| : : : : : : : : : : : : : : : :  |               |
| 3' UUCCCUUACUUCGGACCAGGCU---- 5' | Csi-miR166d.1 |

Csi-miR166d.1, target=Cs4g19310.1 gene=Cs4g19310  
 Category:1  
 Score=4  
 Cleavage Site=677



```

5' CCCGGGAUGAAGCCUGGUC CGGAUUC 3'          Cs4g19310.1
   .....
3' UCCCUUACUUCGGACCAGGCU---- 5'          Csi-miR166d.1

```

Csi-miR166d.1, target=Cs8g16510.1 gene=Cs8g16510  
 Category:1  
 Score=4  
 Cleavage Site=1434



5' CCUGGGAUGAAGCCUGGUCGGAUUC 3'  
 :::::::::::::::::::::  
 3' UCCCUUACUUCGGACCAGGCU---- 5'

Cs8g16510.1

Csi-miR166d.1



Csi-miR166d.2, target=Cs1g15640.1 gene=Cs1g15640  
 Category:3  
 Score=2.5  
 Cleavage Site=1781



|    |                            |    |               |
|----|----------------------------|----|---------------|
| 5' | CCUGGAAUGAAGCCUGGUCCGGAUUC | 3' | Cs1g15640.1   |
|    | .....                      |    |               |
| 3' | -UCCCUUACUUCGGACCAGGCU---- | 5' | Csi-miR166d.2 |

Csi-miR166d.2, target=Cs2g09770.1 gene=Cs2g09770  
 Category:1  
 Score=3  
 Cleavage Site=1058



```

5' AUUGGGAUGAAGCCUGGUCGGAUUC 3'      Cs2g09770.1
   ::::::::::::::::::::.
3' -UCCCUUACUUCGGACCAGGCU---- 5'      Csi-miR166d.2
  
```

Csi-miR166d.2, target=Cs4g19310.1 gene=Cs4g19310  
 Category:1  
 Score=3  
 Cleavage Site=677



|    |                            |    |               |
|----|----------------------------|----|---------------|
| 5' | CCCGGAUGAAGCCUGGUCGGAUUC   | 3' | Cs4g19310.1   |
|    | .....                      |    |               |
| 3' | -UCCCUUACUUCGGACCAGGCU---- | 5' | Csi-miR166d.2 |

Csi-miR166d.2, target=Cs8g16510.1 gene=Cs8g16510  
 Category:1  
 Score=3  
 Cleavage Site=1434



5' CCUGGGAUGAAGCCUGGUCGGAUUC 3'  
 ::::::::::::::::::::.  
 3' -UCCCUUACUUCGGACCAGGCU---- 5'

Cs8g16510.1  
 Csi-miR166d.2

Csi-miR166g.1, target=Cs1g15640.1 gene=Cs1g15640  
 Category:3  
 Score=4  
 Cleavage Site=1781

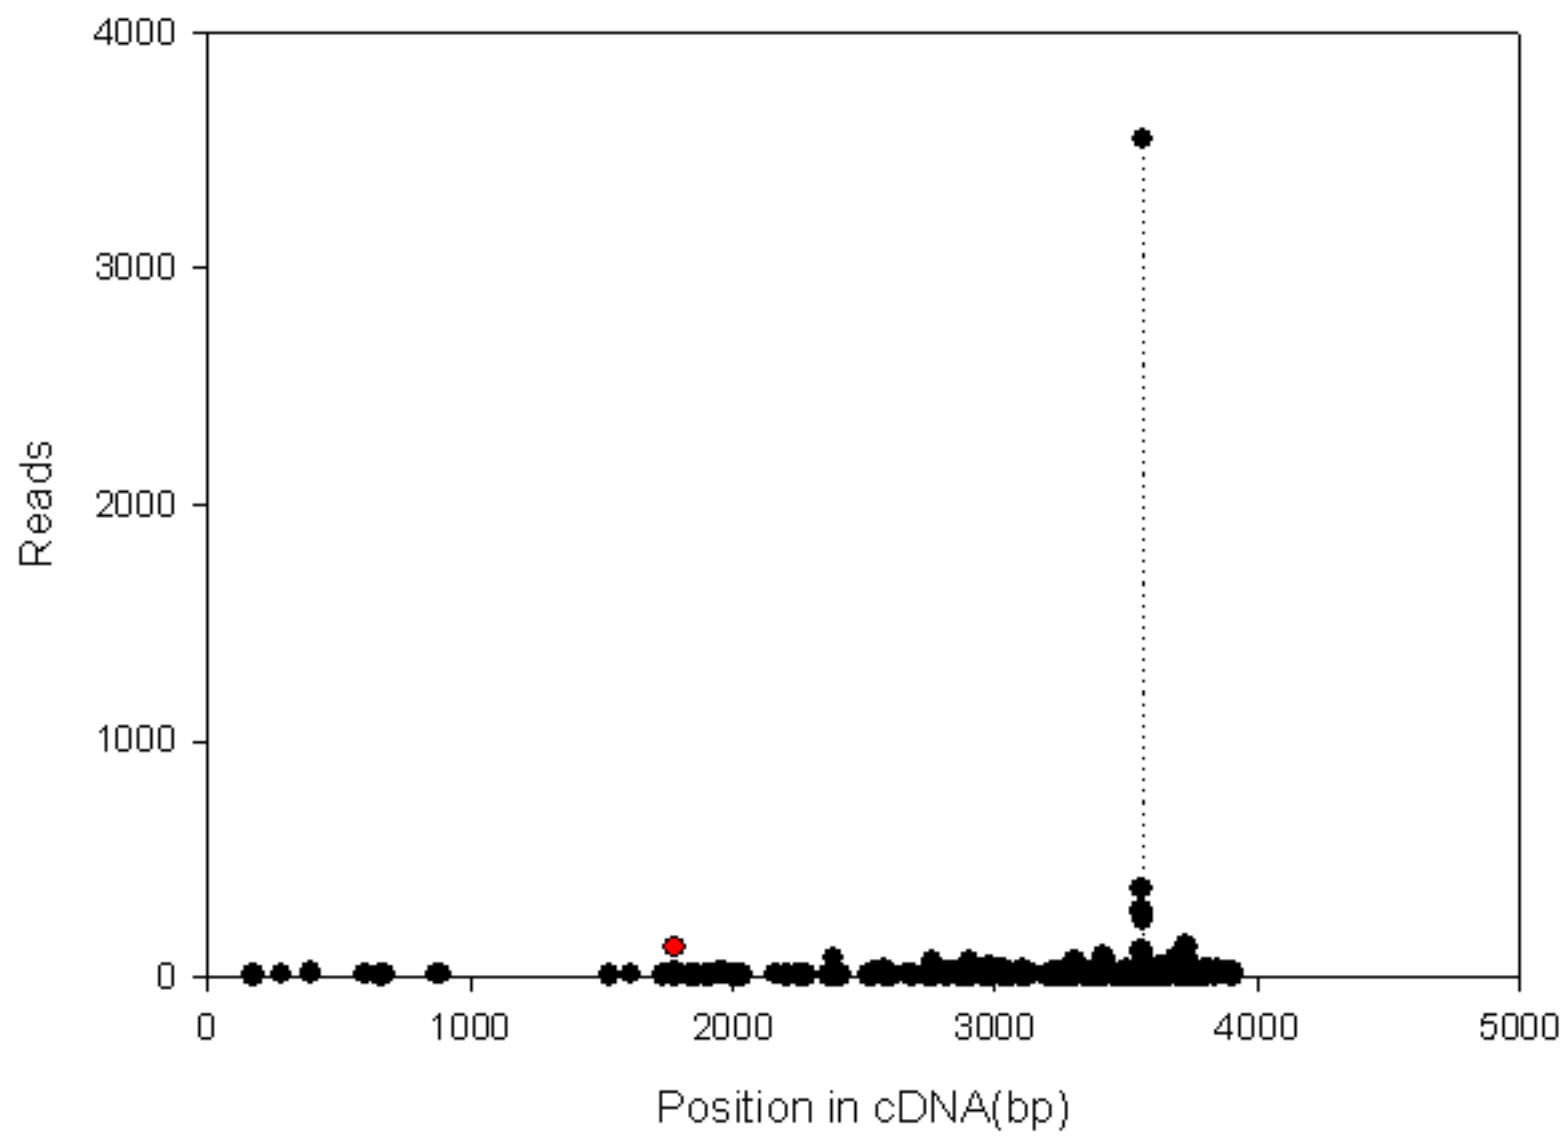

```

5' CCUGGAAUGAAGCCUGGUC CGGAUUC 3'      Cs1g15640.1
   ::::::::::::::::::::.
3' ---CCUACUUCGGACCAGGCUCU-- 5'      Csi-miR166g.1
  
```

Csi-miR166g.1, target=Cs2g09770.1 gene=Cs2g09770  
 Category:1  
 Score=4.5  
 Cleavage Site=1058



```

5' AUUGGGAUGAAGCCUGGUC CGGAUUC 3' Cs2g09770.1
   : : : : : : : : : : : : : : : :
3' ---CCU UACUUCGGACCAGGCUCU-- 5' Csi-miR166g.1
  
```

Csi-miR166g.1, target=Cs4g19310.1 gene=Cs4g19310  
 Category:1  
 Score=4.5  
 Cleavage Site=677



|    |                            |    |               |
|----|----------------------------|----|---------------|
| 5' | CCCGGGAUGAAGCCUGGUCGGAUUC  | 3' | Cs4g19310.1   |
|    | .....                      |    |               |
| 3' | ---CCUUACUUCGGACCAGGCUCU-- | 5' | Csi-miR166g.1 |

Csi-miR166g.1, target=Cs8g16510.1 gene=Cs8g16510  
 Category:1  
 Score=4.5  
 Cleavage Site=1434



```

5' CCUGGGAUGAAGCCUGGUCGGAUUC 3'      Cs8g16510.1
   ::::::::::::::::::::.
3' ---CCUACUUCGGACCAGGCUCU-- 5'      Csi-miR166g.1

```



Csi-miR166i, target=Cs1g15640.1 gene=Cs1g15640  
 Category:3  
 Score=2  
 Cleavage Site=1781



```

5' CCUGGAAUGAAGCCUGGUCCGGAUUC 3'      Cs1g15640.1
   ::::::::::::::::::::
3' --CCCUUACUUCGGACCAGGCUU--- 5'      Csi-miR166i
  
```

Csi-miR166i, target=Cs2g09770.1 gene=Cs2g09770  
 Category:1  
 Score=2.5  
 Cleavage Site=1058



```

5' AUUGGGAUGAAGCCUGGUC CGGAUUC 3'      Cs2g09770.1
   : : : : : : : : : : : : : : : : :
3' --CCCUUACUUCGGACCAGGCUU--- 5'      Csi-miR166i
  
```

Csi-miR166i, target=Cs4g19310.1 gene=Cs4g19310  
 Category:1  
 Score=2.5  
 Cleavage Site=677



```

5' CCCGGGAUGAAGCCUGGUCCGGAUUC 3'      Cs4g19310.1
      ::::::::::::::::::::
3' --CCCUUACUUCGGACCAGGCUU--- 5'      Csi-miR166i
  
```

Csi-miR166i, target=Cs8g16510.1 gene=Cs8g16510  
 Category:1  
 Score=2.5  
 Cleavage Site=1434



```

5' CCUGGGAUGAAGCCUGGUCCGGAUUC 3'      Cs8g16510.1
   .....
3' --CCCUUACUUCGGACCAGGCUU--- 5'      Csi-miR166i
  
```

Csi-miR166j.1, target=Cs1g15640.1 gene=Cs1g15640  
 Category:3  
 Score=3.5  
 Cleavage Site=1781



```

5' CCUGGAAUGAAGCCUGGUCCGGAUUC 3'          Cs1g15640.1
   ::::::::::::::::::::
3' -CUCCUUACUUCGGACCAGGUU---- 5'          Csi-miR166j.1
  
```

Csi-miR166j.1, target=Cs2g09770.1 gene=Cs2g09770  
 Category:1  
 Score=4  
 Cleavage Site=1058

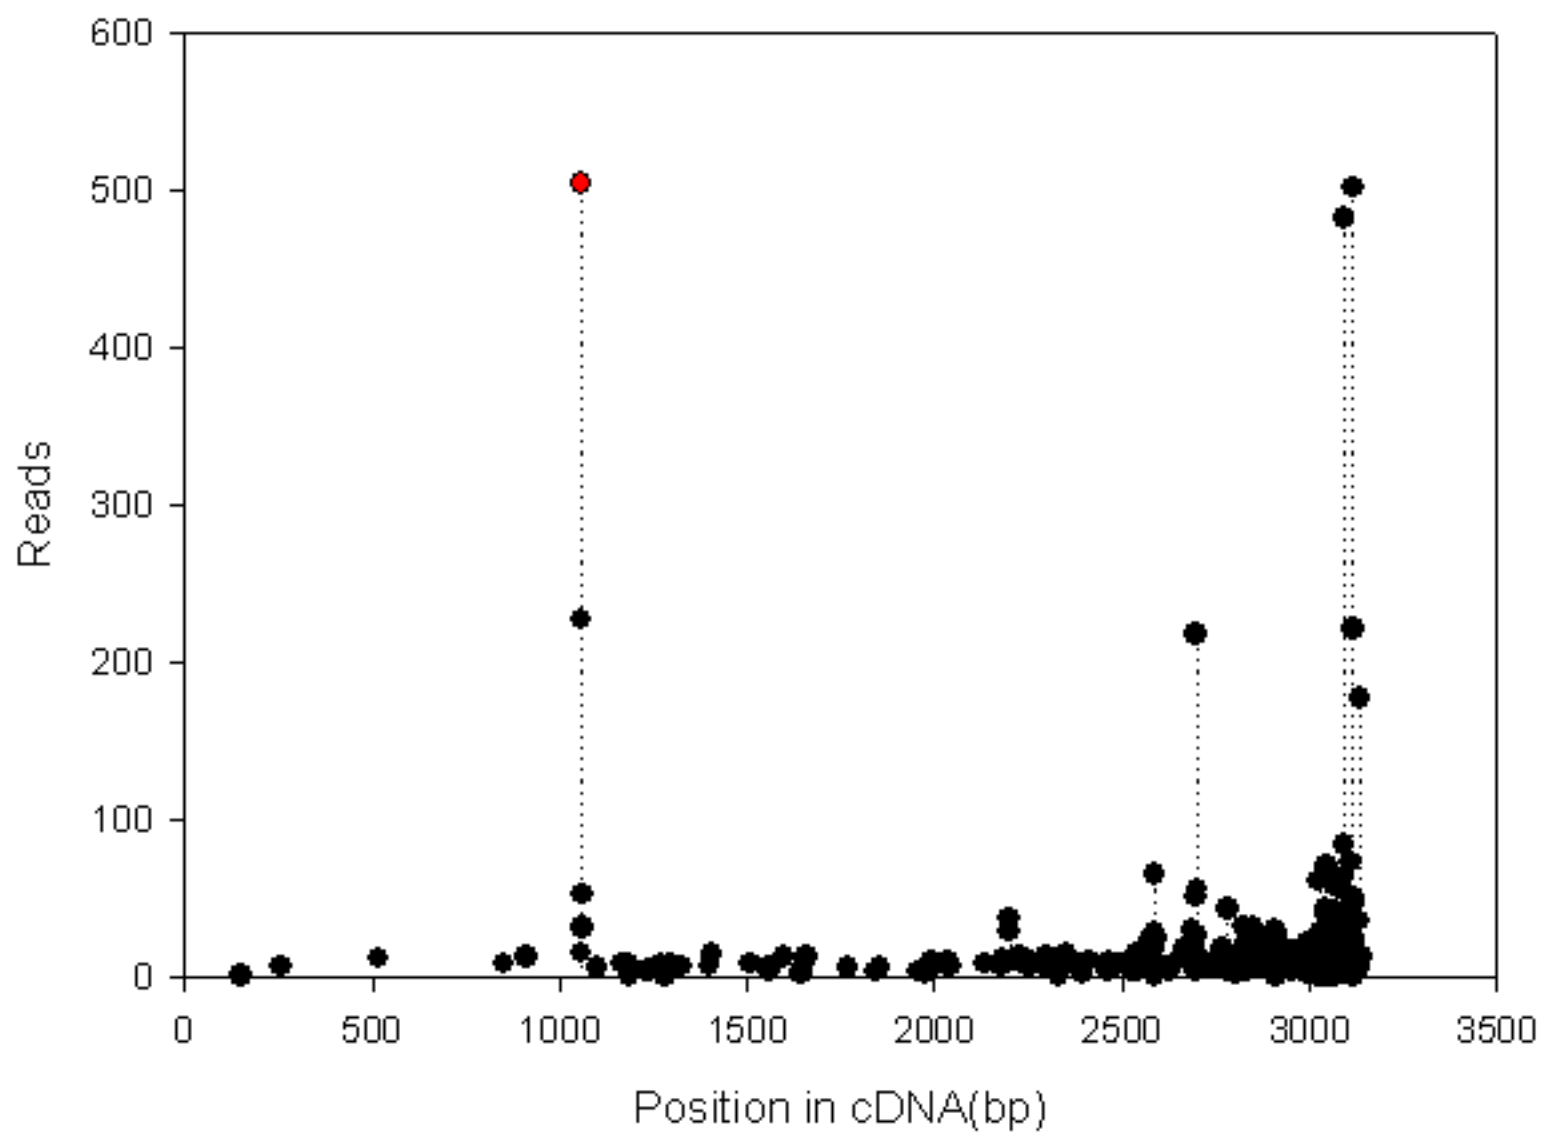

```

5' AUUGGGAUGAAGCCUGGUC CGGAUUC 3' Cs2g09770.1
   .....
3' -CUCCUUACUUCGGACCAGGUU---- 5' Csi-miR166j.1
  
```

Csi-miR166j.1, target=Cs4g19310.1 gene=Cs4g19310  
 Category:1  
 Score=4  
 Cleavage Site=677



|    |                            |    |               |
|----|----------------------------|----|---------------|
| 5' | CCCGGGAUGAAGCCUGGUCGGAUUC  | 3' | Cs4g19310.1   |
|    | .....                      |    |               |
| 3' | -CUCCUUACUUCGGACCAGGUU---- | 5' | Csi-miR166j.1 |

Csi-miR166j.1, target=Cs8g16510.1 gene=Cs8g16510  
 Category:1  
 Score=4  
 Cleavage Site=1434



```

5' CCUGGGAUGAAGCCUGGUCGGAUUC 3'          Cs8g16510.1
   ::::::::::::::::::::
3' -CUCCUUACUUCGGACCAGGUU---- 5'          Csi-miR166j.1
  
```



Csi-miR166j.2, target=Cs1g15640.1 gene=Cs1g15640  
 Category:3  
 Score=5  
 Cleavage Site=1781



|    |                             |    |               |
|----|-----------------------------|----|---------------|
| 5' | CCUGGAAUGAAGCCUGGUC CGGAUUC | 3' | Cs1g15640.1   |
|    | ::::::::::::::::::::::::::  |    |               |
| 3' | ---CCUUACUUCGGACCAGGUUCU--  | 5' | Csi-miR166j.2 |

Csi-miR166j.3, target=Cs1g15640.1 gene=Cs1g15640  
 Category:3  
 Score=2.5  
 Cleavage Site=1781

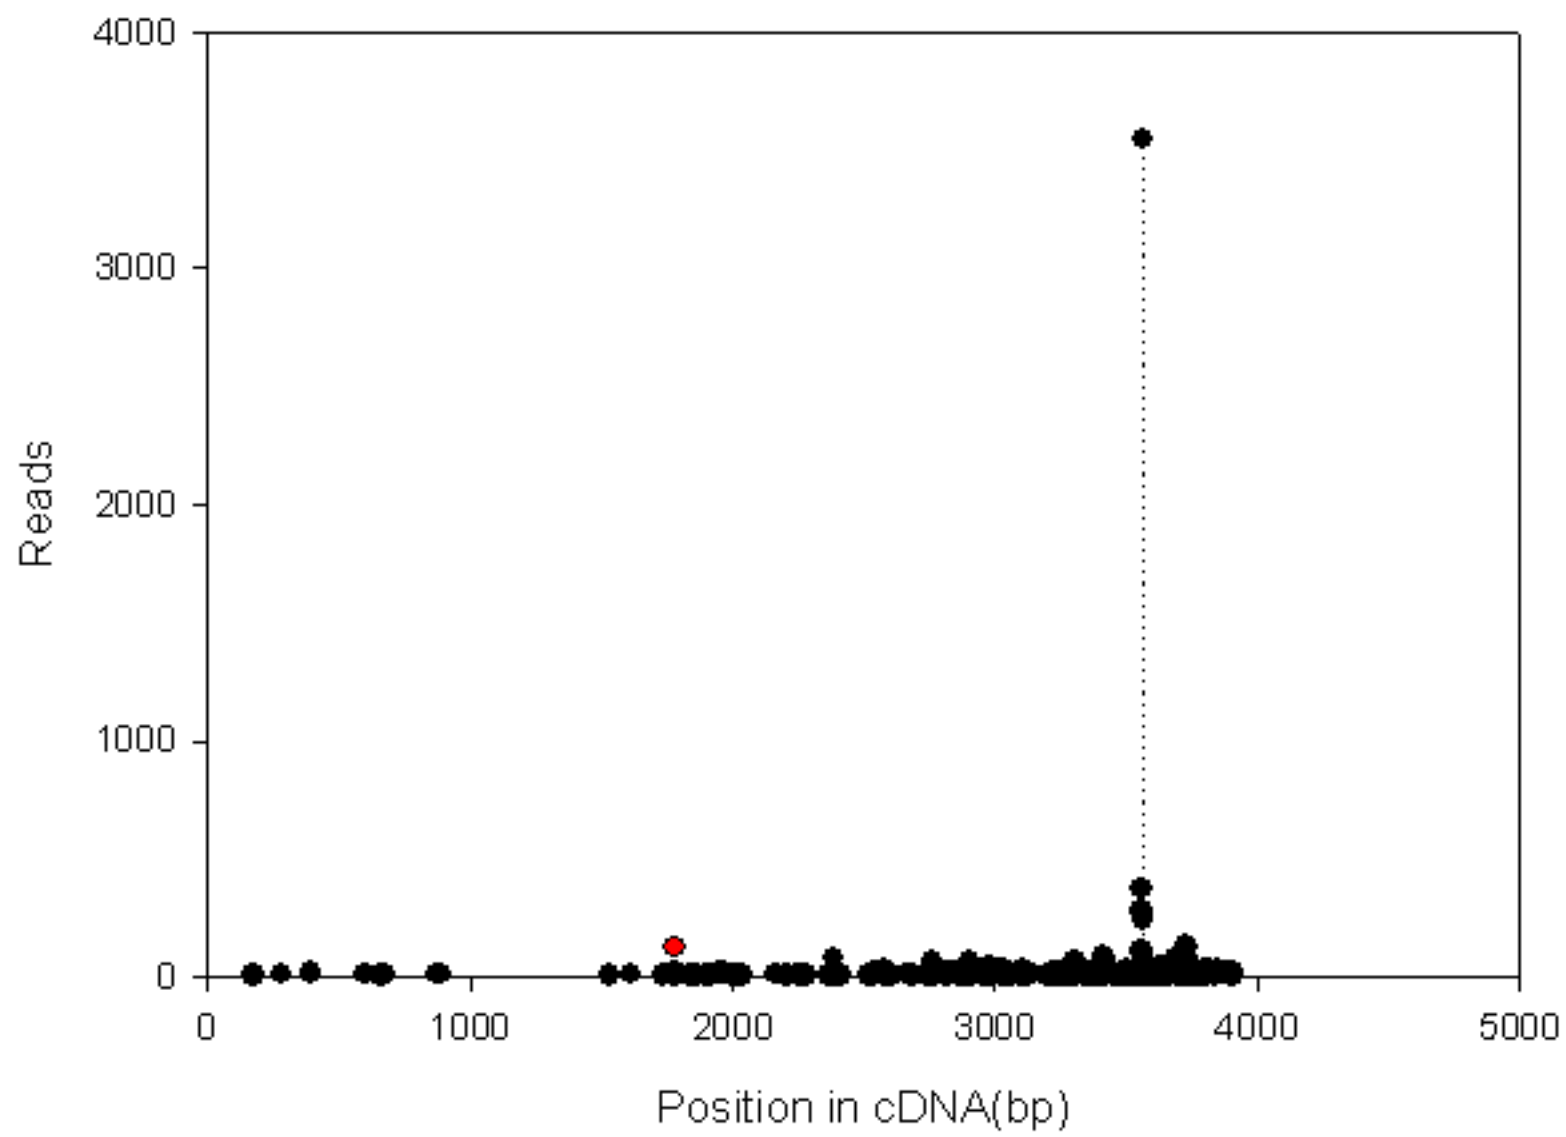

```

5' CCUGGAAUGAAGCCUGGUCCGGAUUC 3'          Cs1g15640.1
   ::::::::::::::::::::::::::::
3' -CACCUUACUUCGGACCAGGUU----- 5'       Csi-miR166j.3
  
```

Csi-miR166j.3, target=Cs2g09770.1 gene=Cs2g09770  
 Category:1  
 Score=3  
 Cleavage Site=1058



5' AUUGGGAUGAAGCCUGGUCGGAUUC 3'  
 :::::::::::::::::::::  
 3' -CACCUUACUUCGGACCAGGUU----- 5'

Cs2g09770.1

Csi-miR166j.3

Csi-miR166j.3, target=Cs4g19310.1 gene=Cs4g19310  
 Category:1  
 Score=4  
 Cleavage Site=677



|    |                            |    |               |
|----|----------------------------|----|---------------|
| 5' | CCCGGGAUGAAGCCUGGUCGGAUUC  | 3' | Cs4g19310.1   |
|    | .....                      |    |               |
| 3' | -CACCUUACUUCGGACCAGGUU---- | 5' | Csi-miR166j.3 |

Csi-miR166j.3, target=Cs8g16510.1 gene=Cs8g16510  
 Category:1  
 Score=3  
 Cleavage Site=1434



```

5' CCUGGGAUGAAGCCUGGUCCGGAUUC 3'      Cs8g16510.1
   ::::::::::::::::::::
3' -CACCUUACUUCGGACCAGGUU---- 5'      Csi-miR166j.3
  
```

Csi-miR167a.1, target=Cs2g15130.1 gene=Cs2g15130  
 Category:1  
 Score=5  
 Cleavage Site=3444

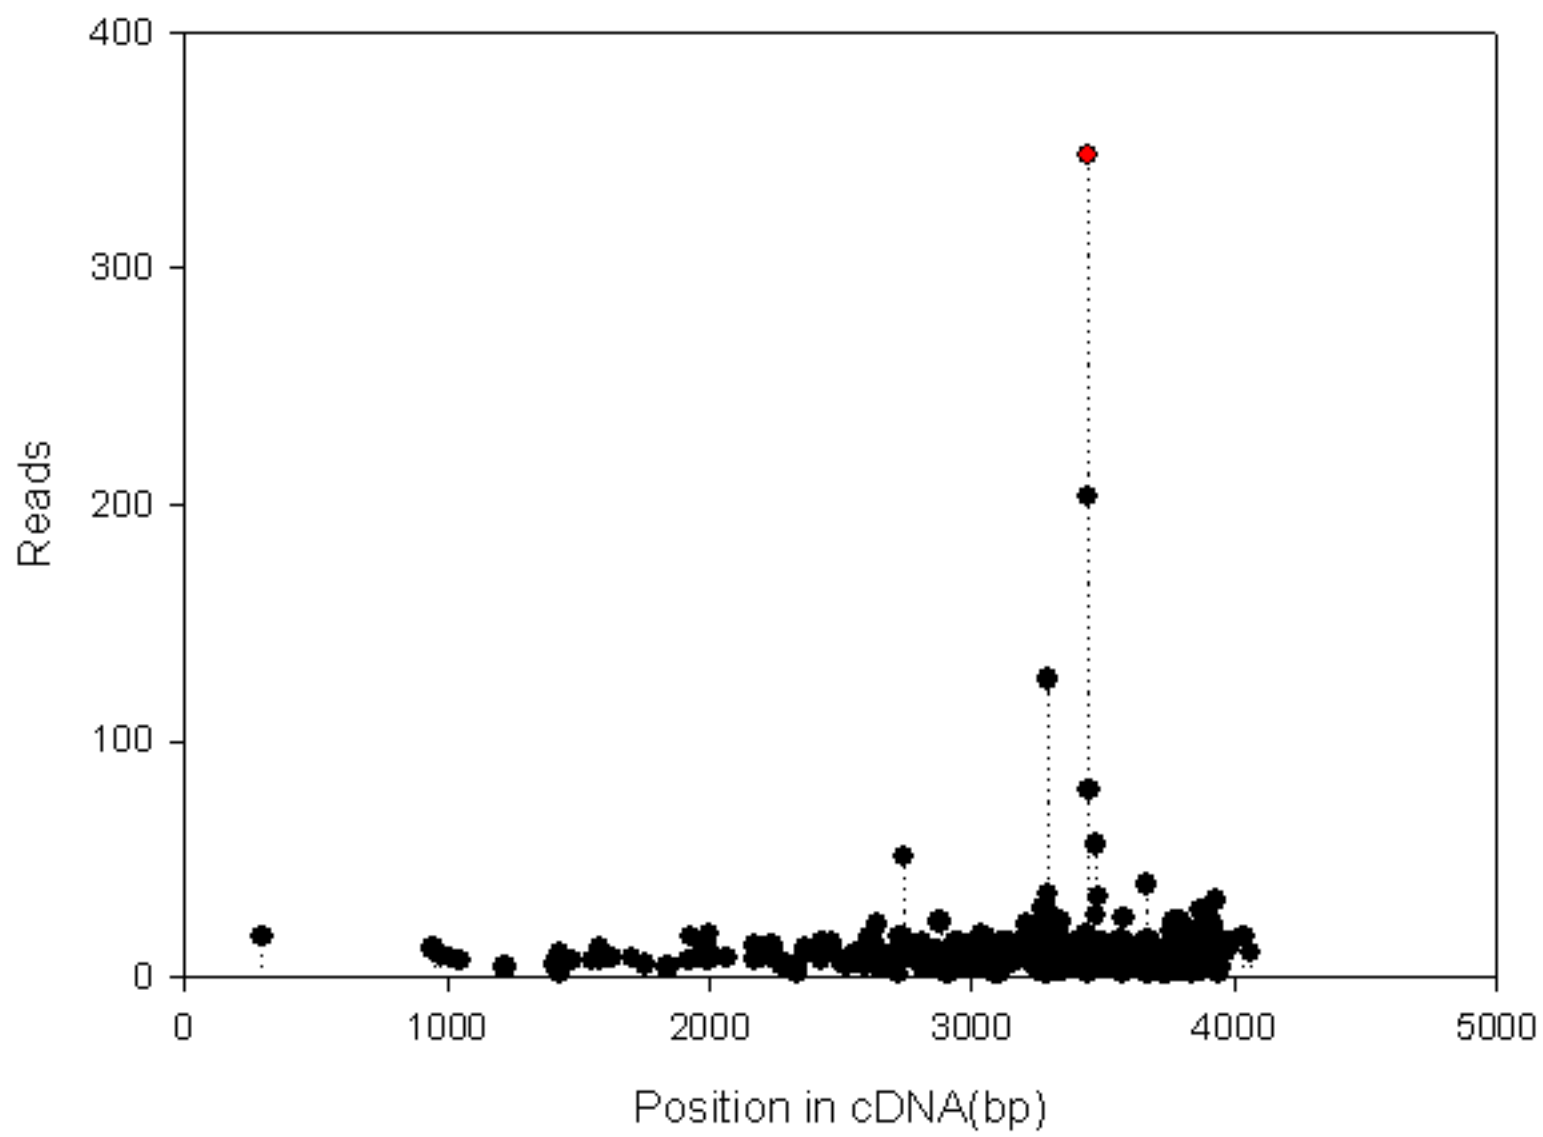

```

5' AGAGAUCAGGCUGGCAGCUUGUAUUU 3'
   ::::: ::::::::::::::: .:
3' -AUCUAGUACGACCGUCGAA-GU--- 5'
  
```

Cs2g15130.1

Csi-miR167a.1

Csi-miR167a.1, target=Cs6g16030.1 gene=Cs6g16030  
 Category:2  
 Score=5  
 Cleavage Site=3357

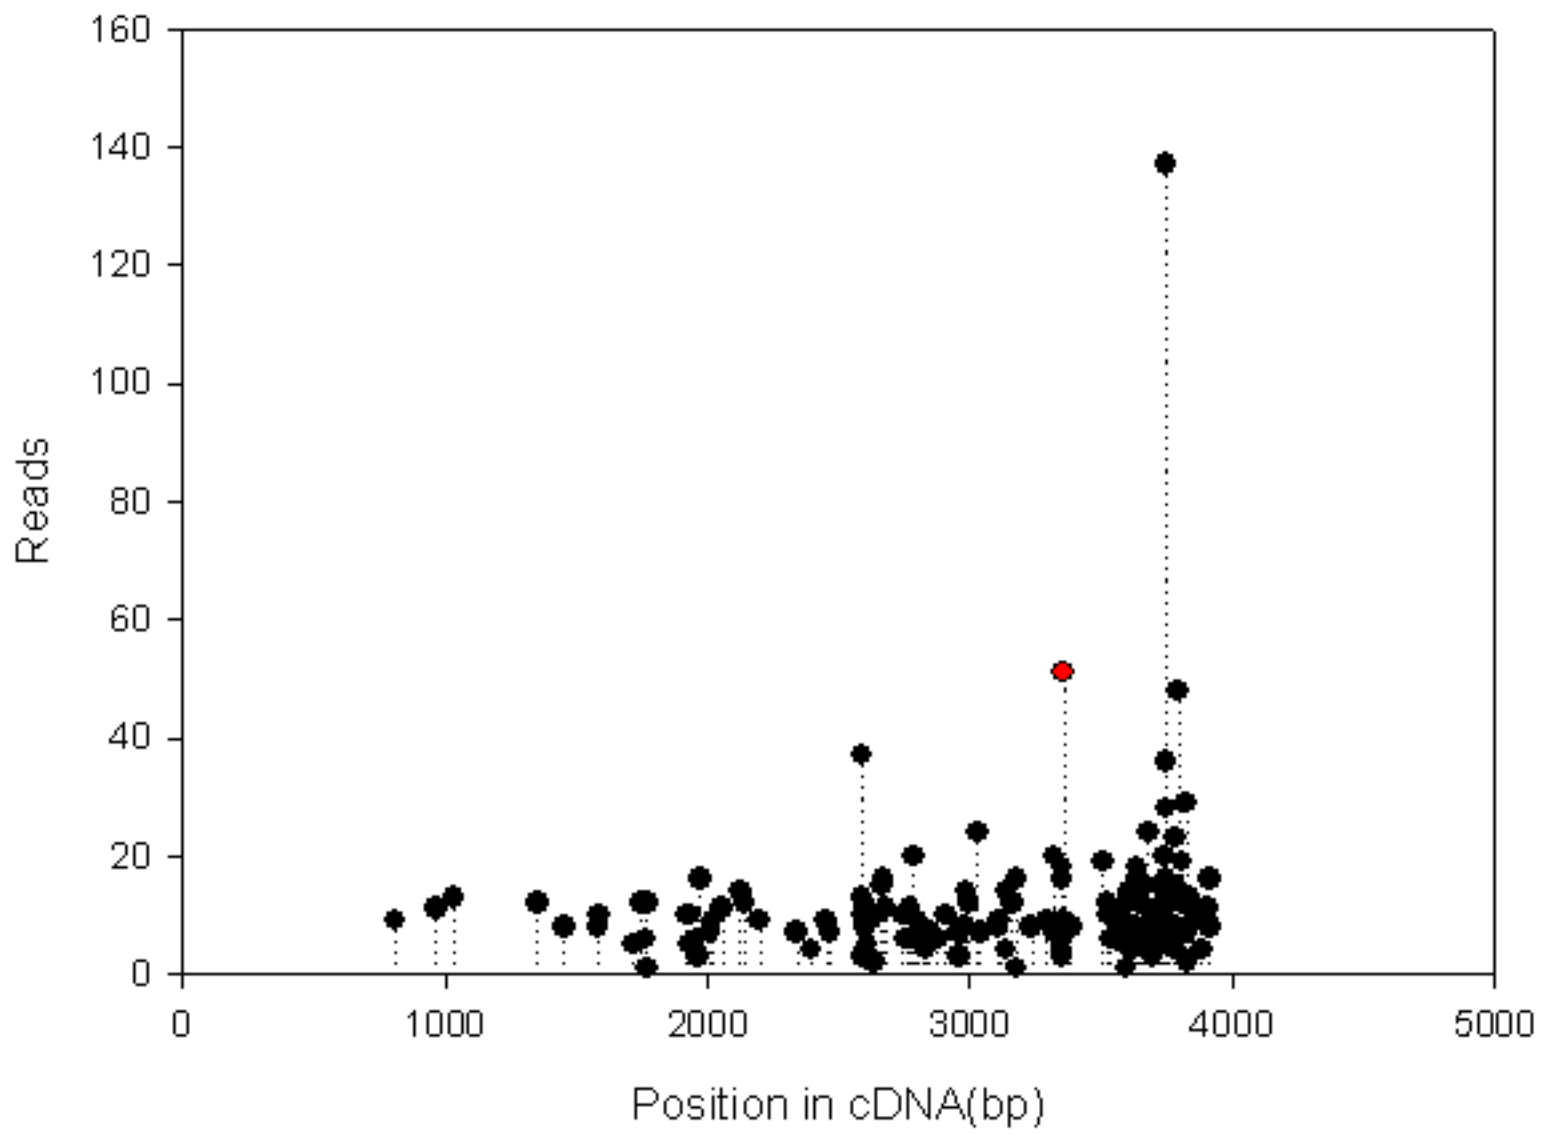

```

5' UUAGAUCAGGCUGGCAGCUUGUAUUC 3'      Cs6g16030.1
   :::::  ::::::::::: .:
3' -AUCUAGUACGACCGUCGAA-GU--- 5'      Csi-miR167a.1
  
```

Csi-miR167a.1,target=Cs2g09440.1 gene=Cs2g09440  
 Category:3  
 Score=5  
 Cleavage Site=3257

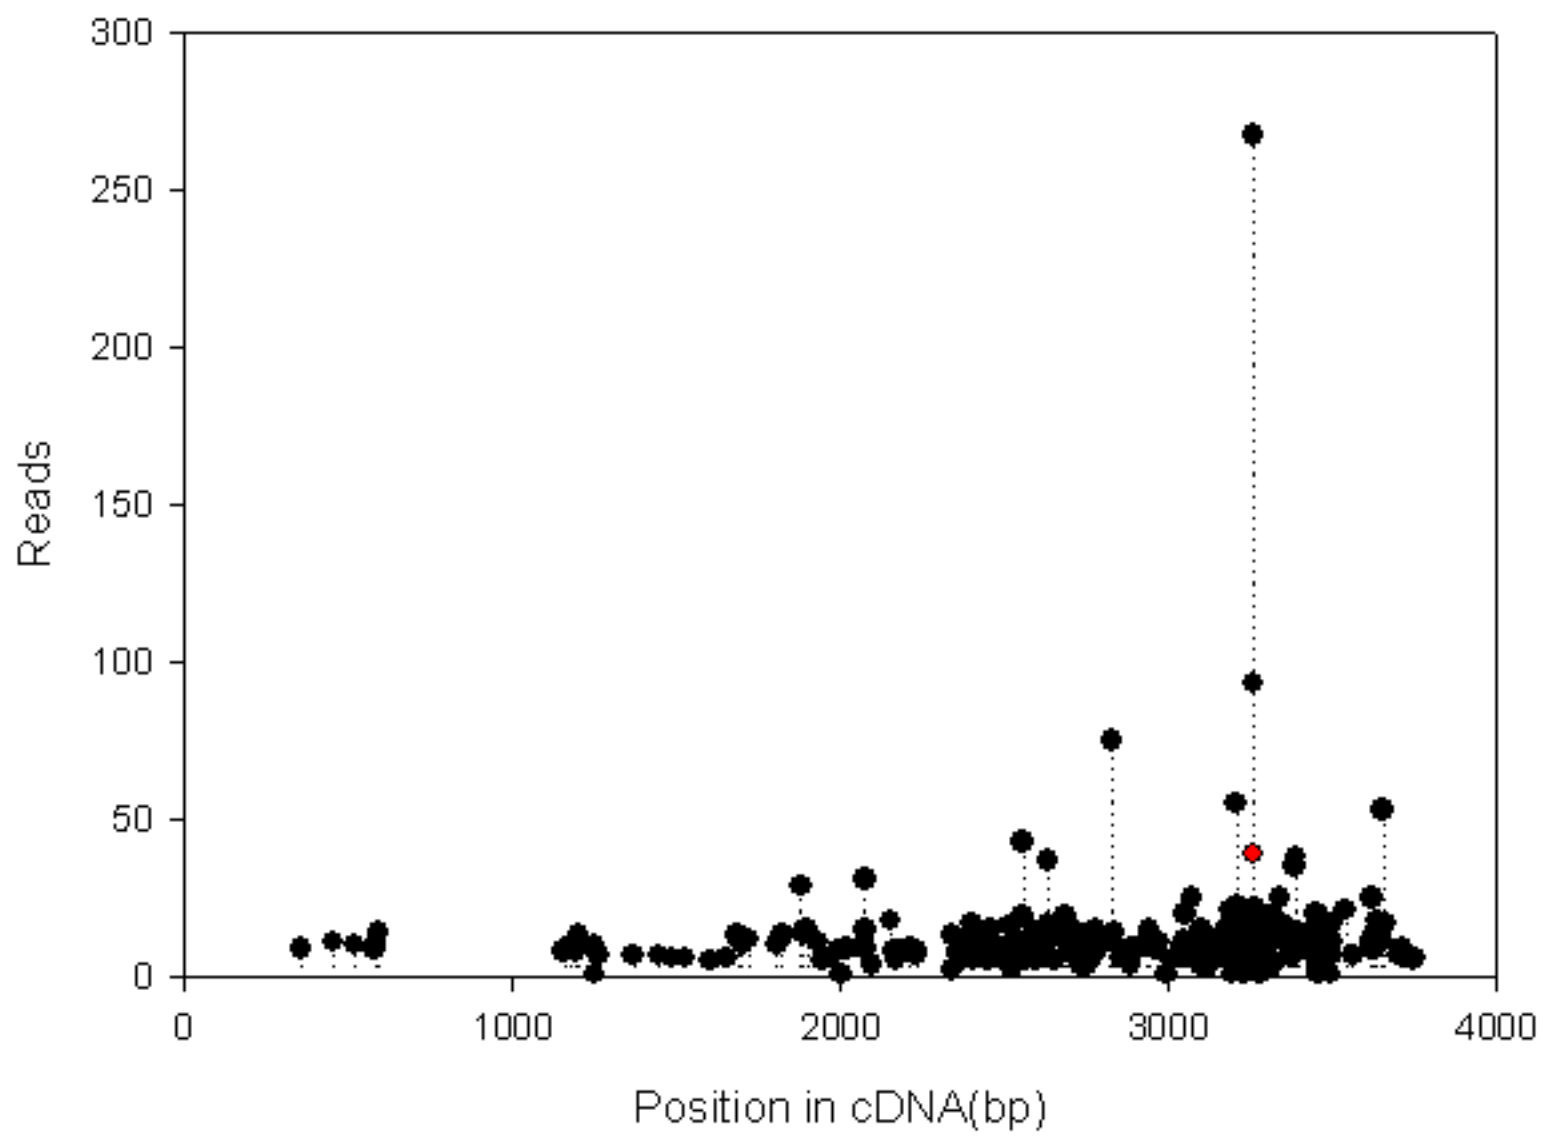

```

5'  UGAGAUCAGGCUGGCAGCUUGUAUUC  3'      Cs2g09440.1
      :::::  :::::::::::::::  .:
3'  -AUCUAGUACGACCGUCGAA-GU---  5'      Csi-miR167a.1

```



Csi-miR167b.1, target=Cs1g09030.1 gene=Cs1g09030  
 Category:2  
 Score=4.5  
 Cleavage Site=1248

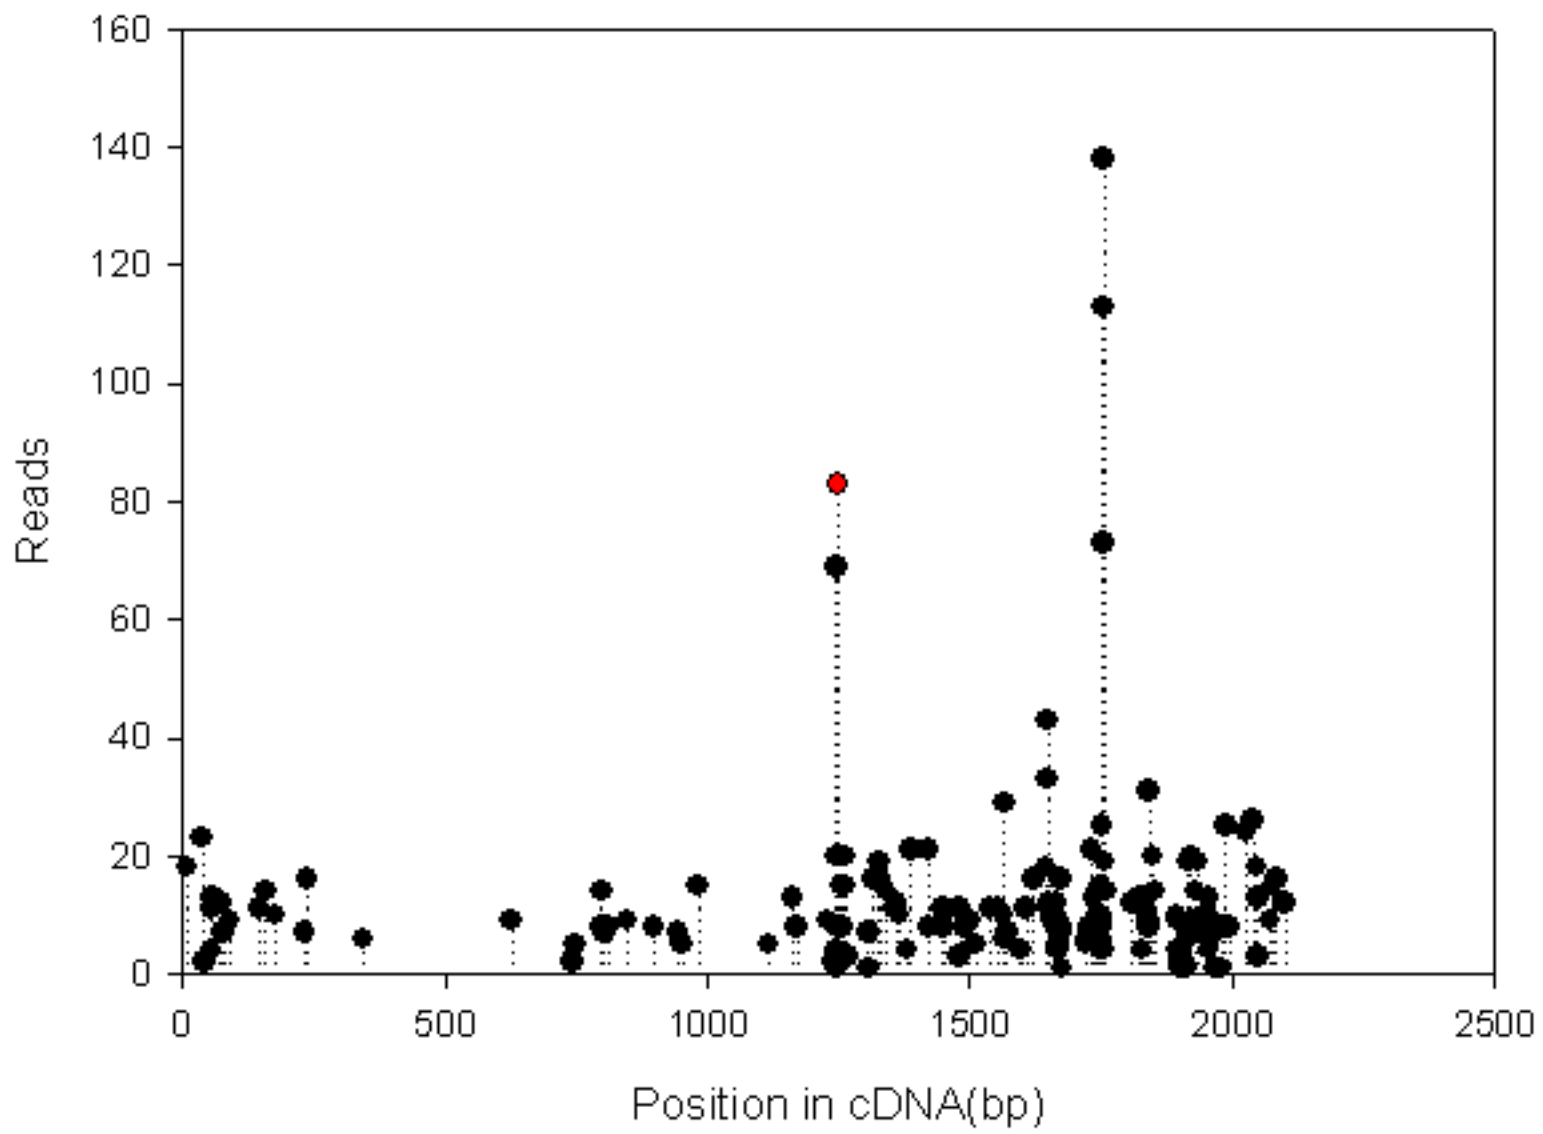

```

5' GUGAAAUCAAGCUGGCAGACUUCGGC 3'      Cs1g09030.1
   :  :  :  :  :  :  :  :  :  :  :
3' ---UCUAGUACGACCGUC-GAAGU-- 5'      Csi-miR167b.1

```

Csi-miR167b.1, target=Cs2g09440.1 gene=Cs2g09440  
 Category:2  
 Score=4  
 Cleavage Site=3259

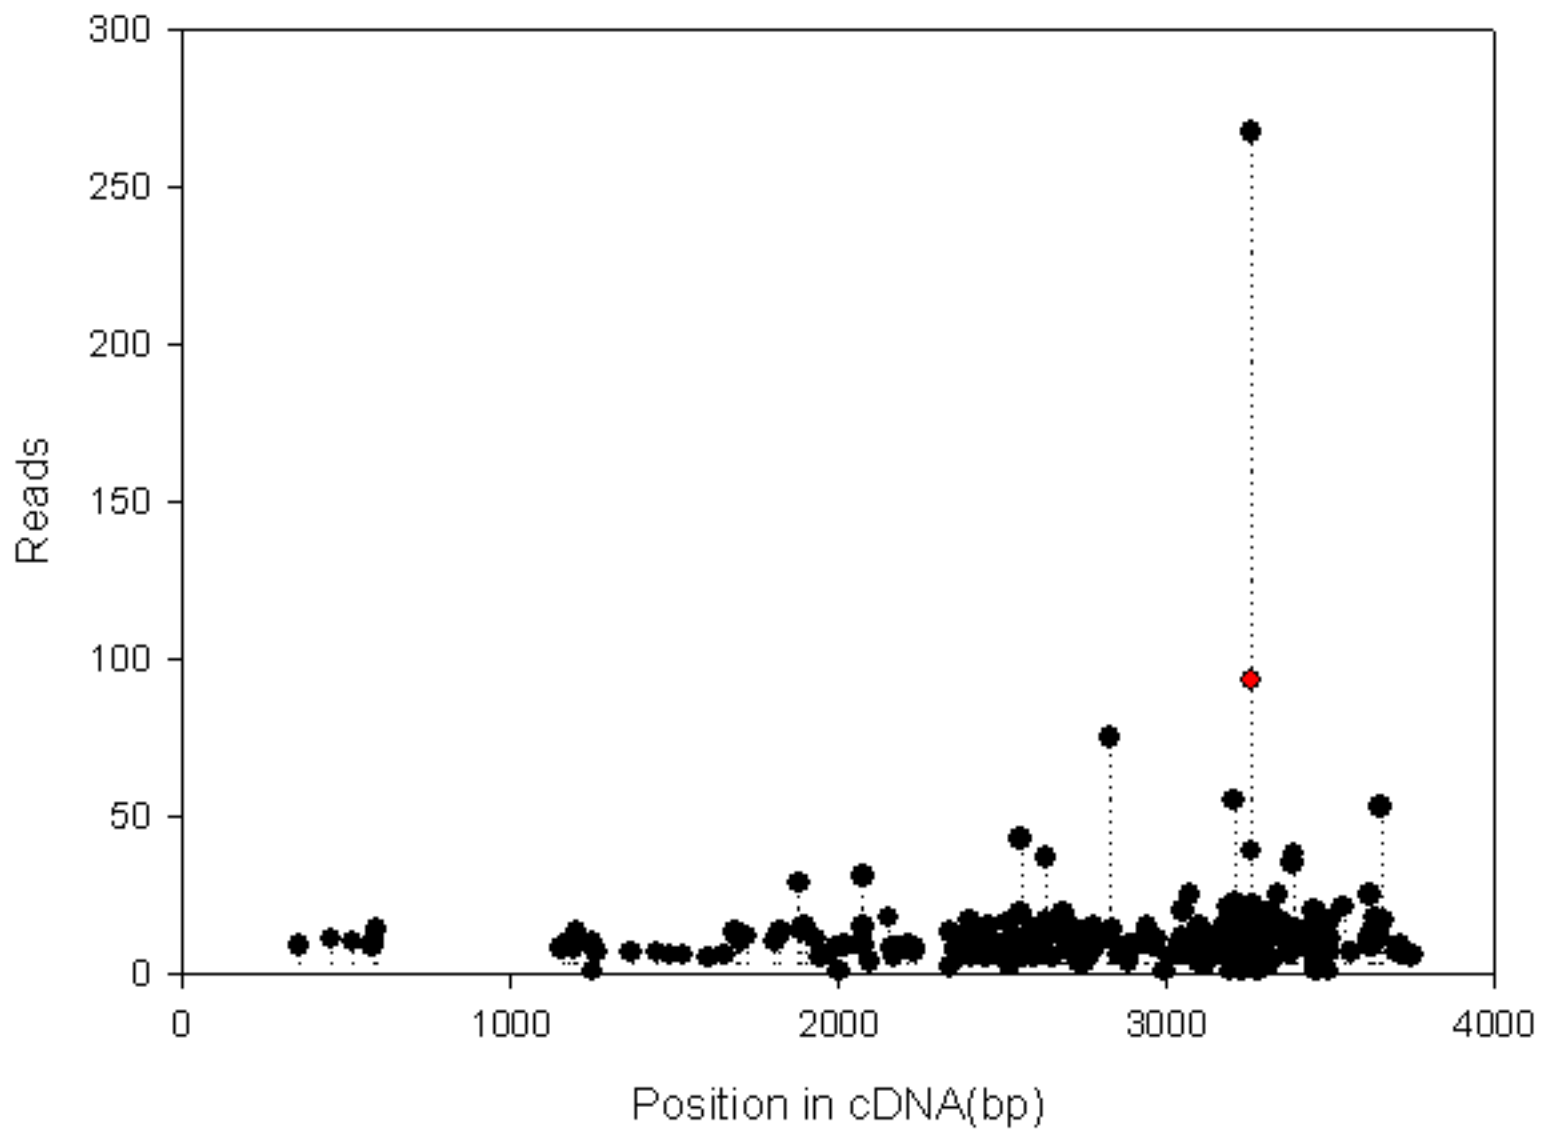

```

5' AGAUCAGGCUGGCAGCUUGUAUUCGU 3'      Cs2g09440.1
   ::::: ::::::::::::::: ..
3' UCUAGUACGACCGUCGAA-GU----- 5'     Csi-miR167b.1

```

Csi-miR167b.1, target=Cs2g15130.1 gene=Cs2g15130  
 Category:1  
 Score=4  
 Cleavage Site=3444

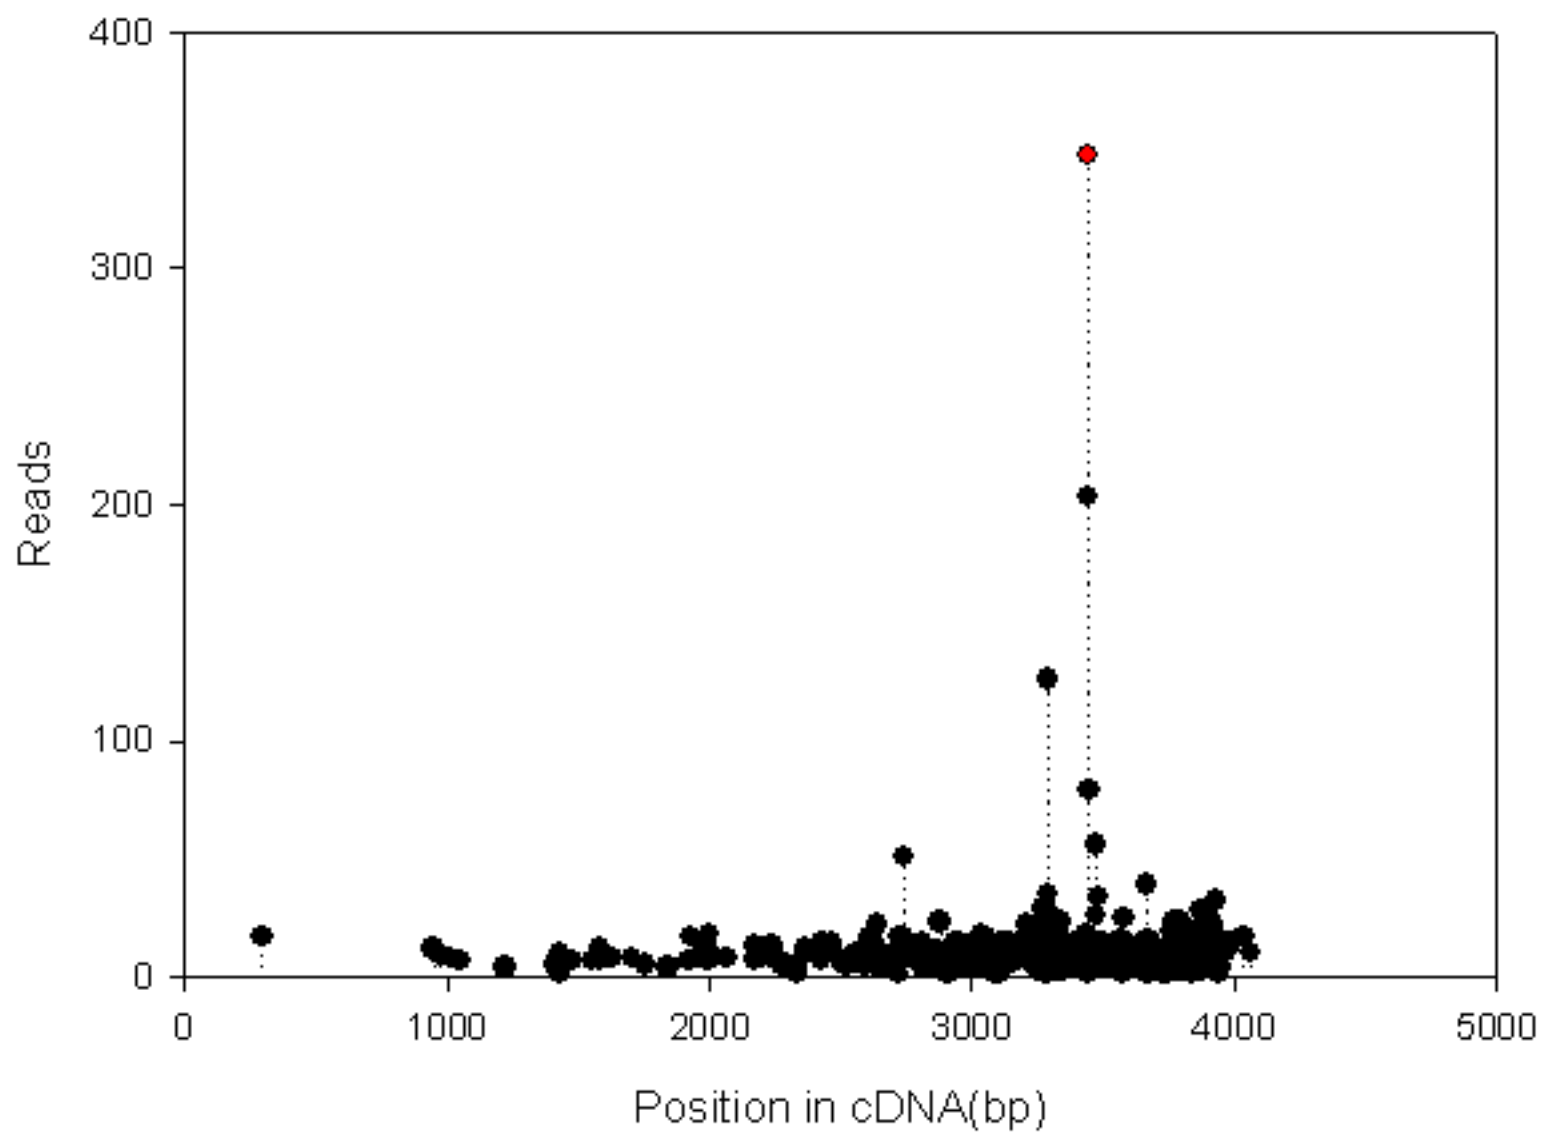

```

5' AGAGAUCAGGCUGGCAGCUUGUAUUU 3'      Cs2g15130.1
   ::::: ::::::::::::::: .:
3' --UCUAGUACGACCGUCGAA-GU--- 5'      Csi-miR167b.1

```

Csi-miR167b.1, target=Cs6g16030.1 gene=Cs6g16030  
 Category:2  
 Score=4  
 Cleavage Site=3357

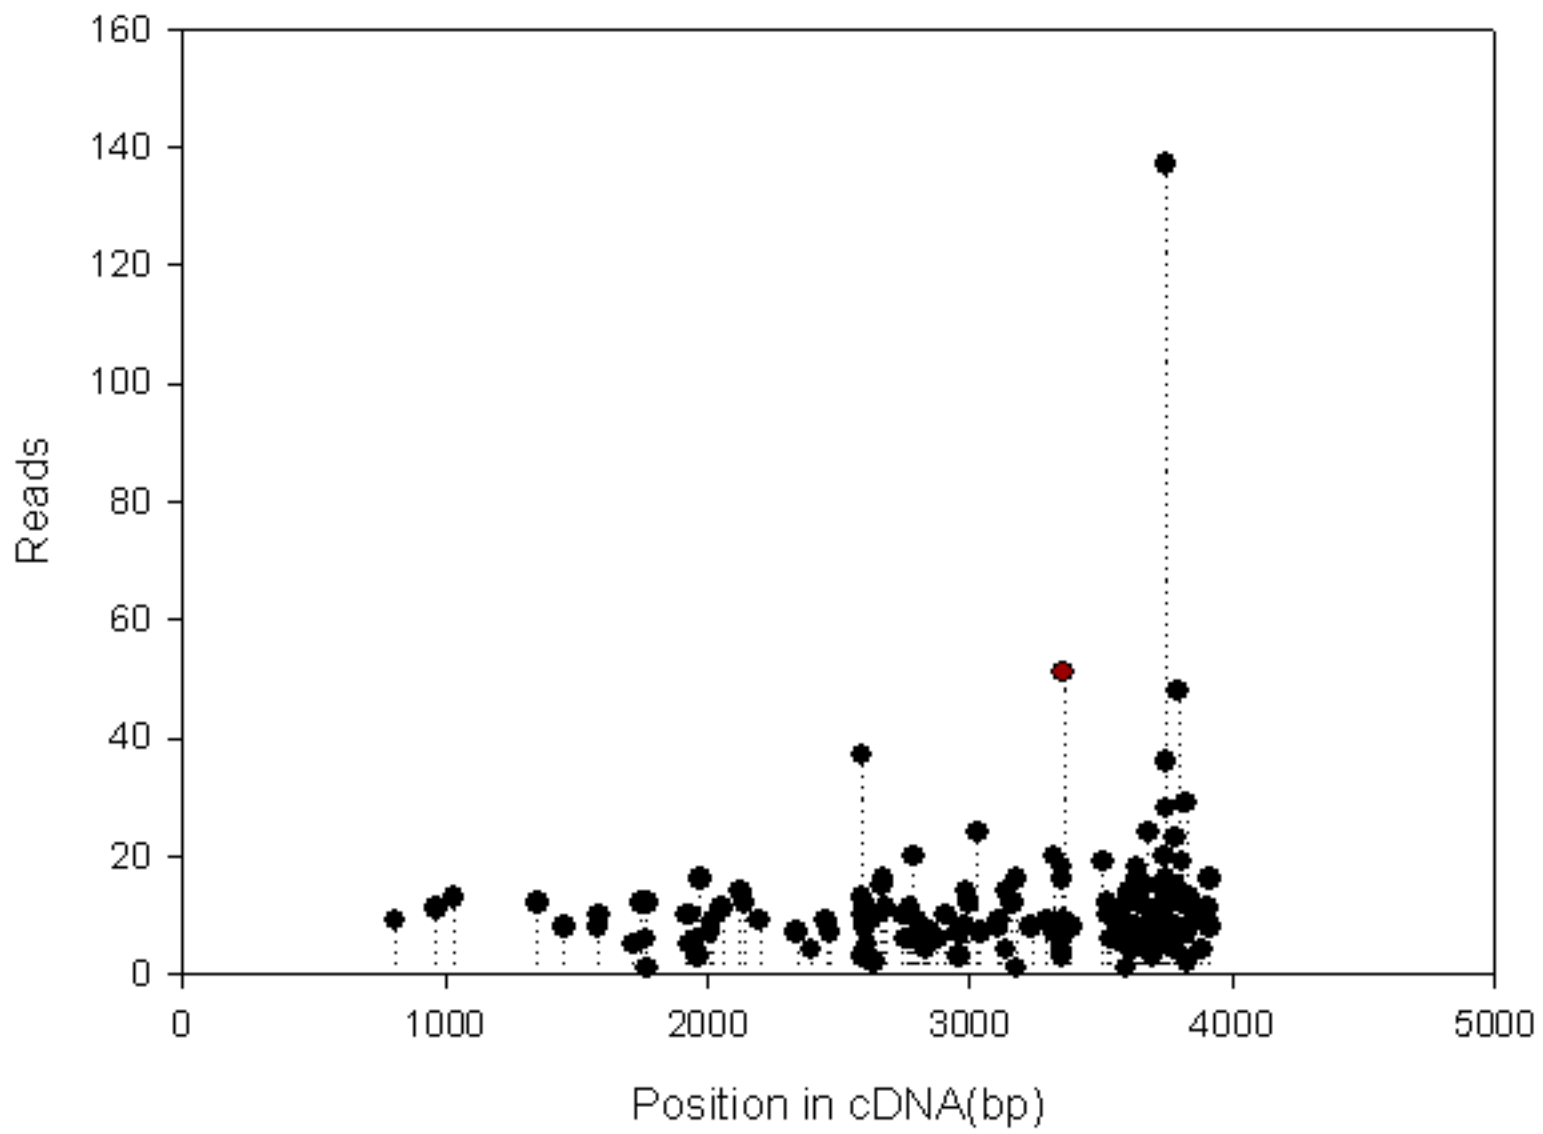

```

5' UUAGAUCAGGCUGGCAGCUUGUAUUC 3'      Cs6g16030.1
   ::::: ::::::::::::::: ..
3' --UCUAGUACGACCGUCGAA-GU--- 5'      Csi-miR167b.1

```

Csi-miR167b.2, target=Cs1g09030.1 gene=Cs1g09030  
 Category:2  
 Score=5  
 Cleavage Site=1248



```

5' GUGAAAUCAAGCUGGCAGACUUCGGC 3'      Cs1g09030.1
   :. : : : : : : : : : : : : :
3' -AUUCUAGUACGACCGUC-GAAGU-- 5'      Csi-miR167b.2
  
```

Csi-miR167b.2, target=Cs2g09440.1 gene=Cs2g09440  
 Category:3  
 Score=4.5  
 Cleavage Site=3257

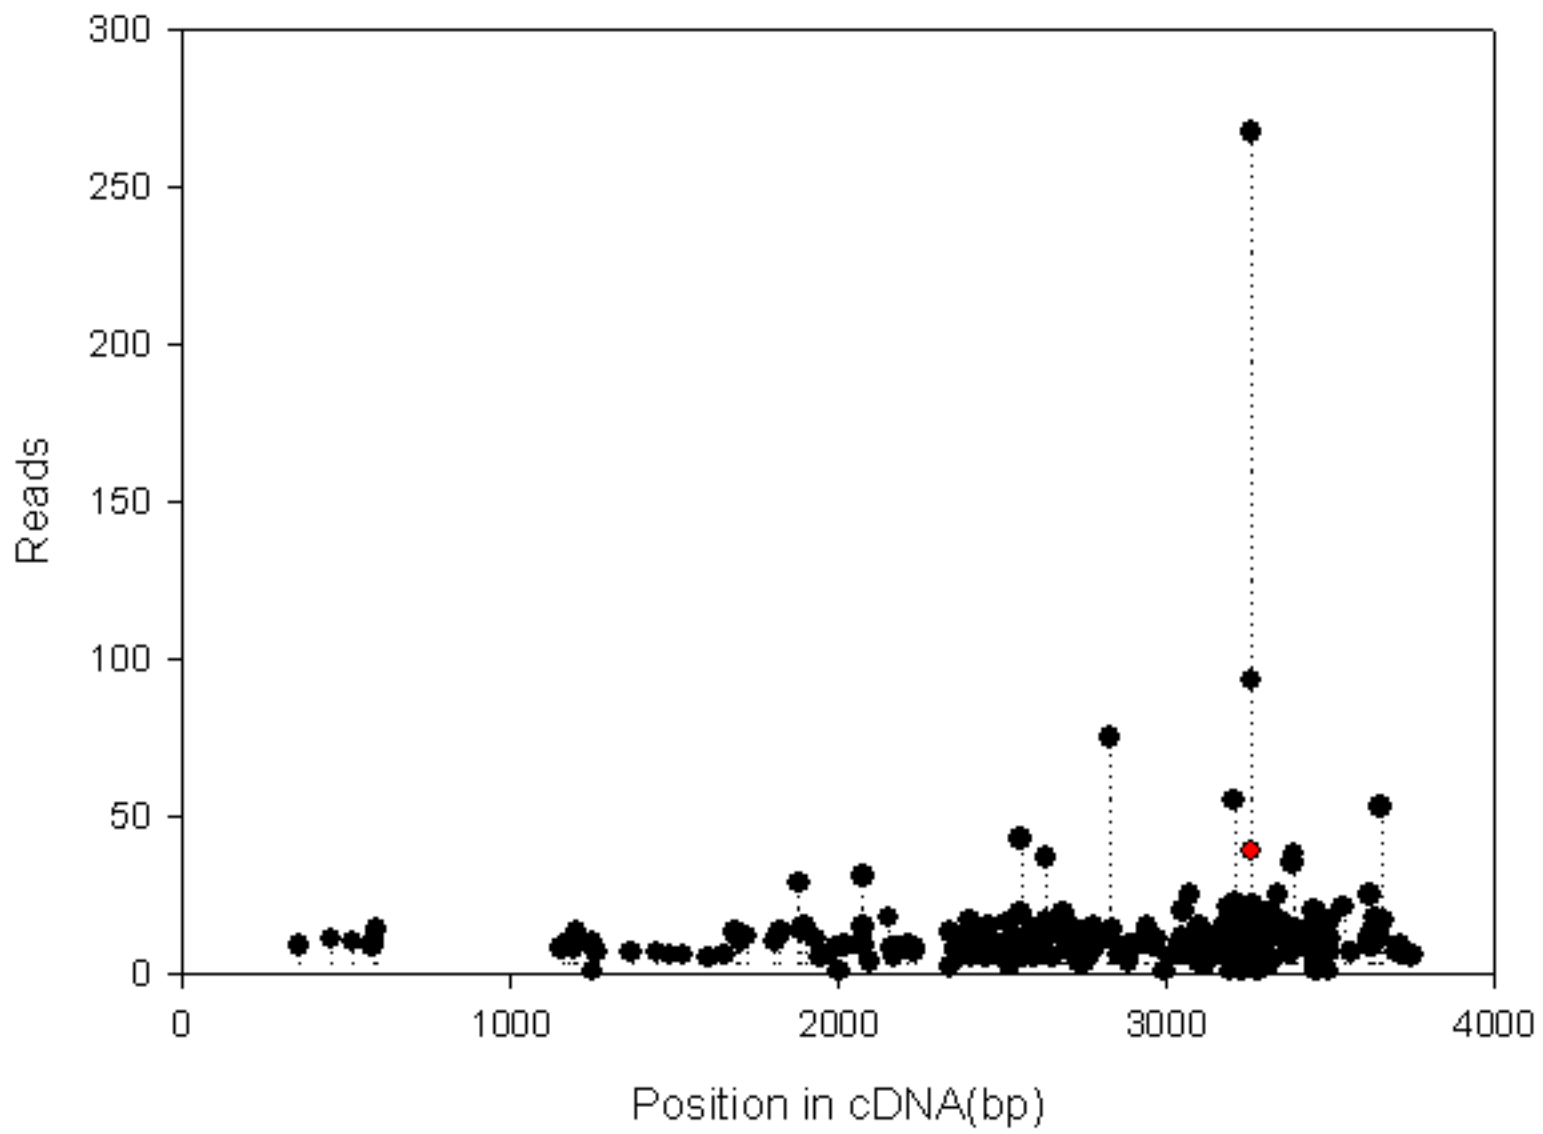

```

5' UGAGAUCAGGCUGGCAGCUUGUAUUC 3'      Cs2g09440.1
   : : : : : : : : : : : : : : : : :
3' AUUCUAGUACGACCGUCGAA-GU--- 5'      Csi-miR167b.2

```

Csi-miR167b.2, target=Cs6g16030.1 gene=Cs6g16030  
 Category:2  
 Score=5  
 Cleavage Site=3357



```

5' UUAGAUCAGGCUGGCAGCUUGUAUUC 3'      Cs6g16030.1
  : : : : : : : : : : : : : : : : :
3' AUUCUAGUACGACCGUCGAA-GU--- 5'      Csi-miR167b.2
  
```

Csi-miR167b.3, target=Cs2g09440.1 gene=Cs2g09440  
 Category:3  
 Score=2.5  
 Cleavage Site=3257

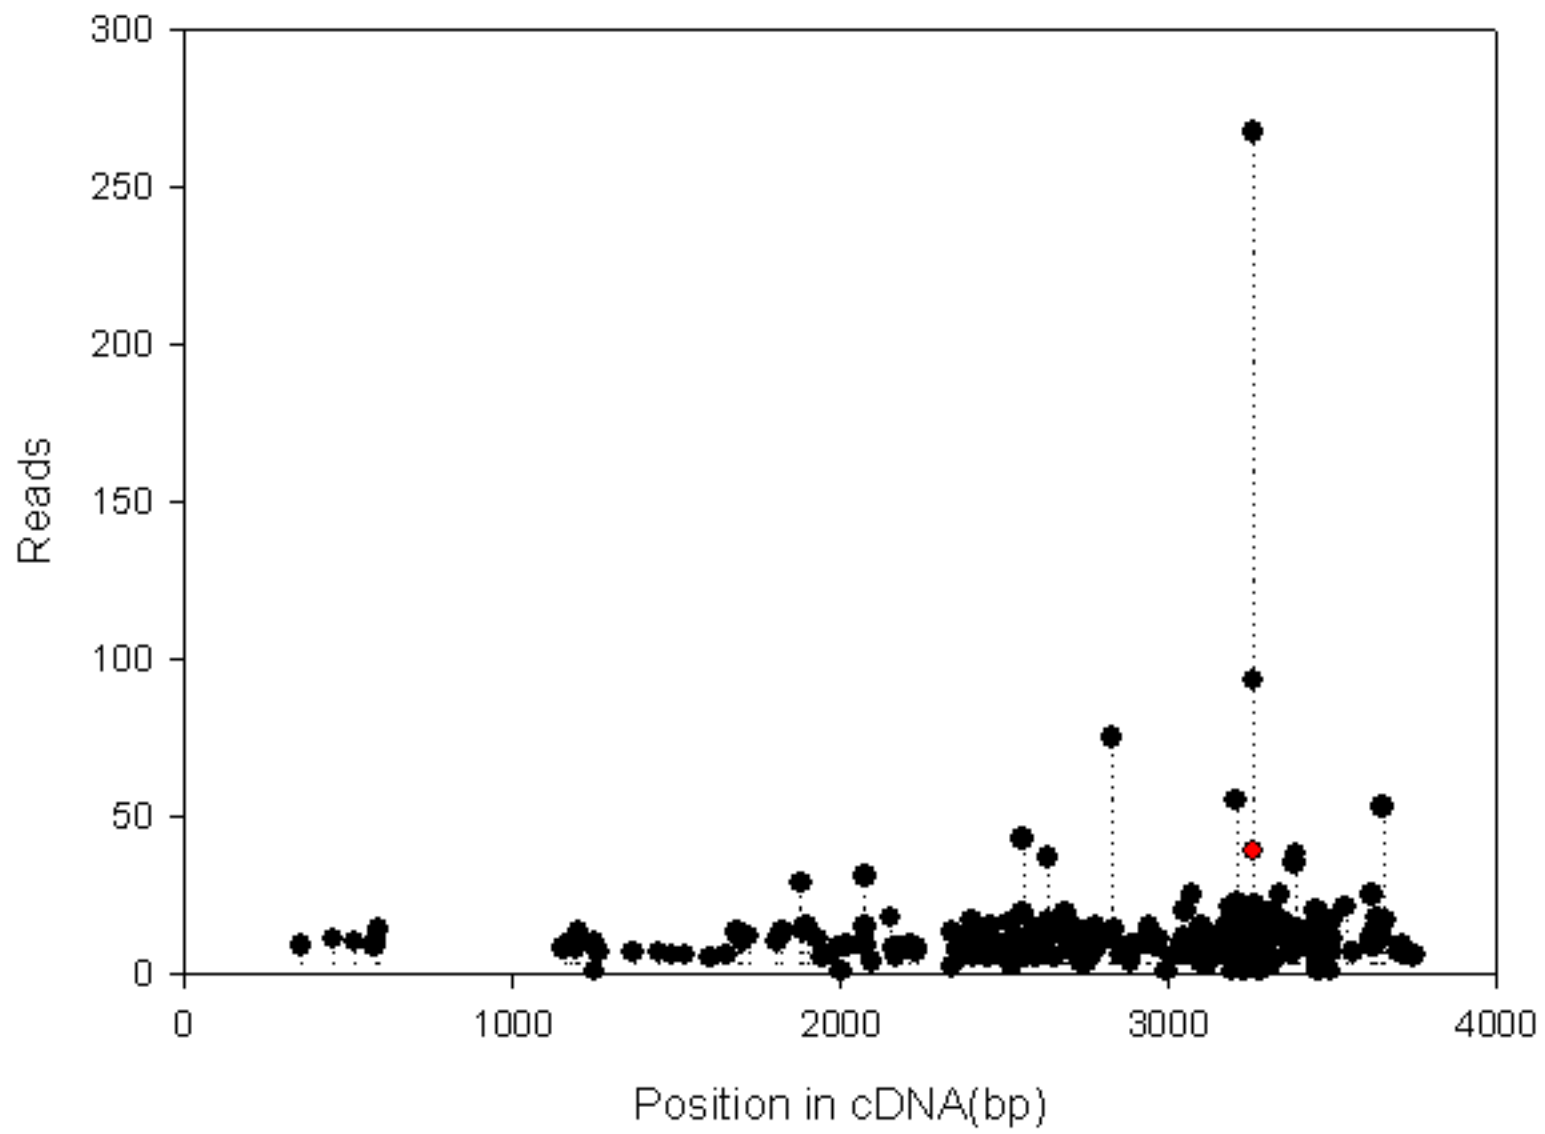

|                                   |               |
|-----------------------------------|---------------|
| 5' UGAGAUCAGGCUGGCAGCUUGUAUUC 3'  | Cs2g09440.1   |
| :.:.:.:.:.:.:.:.:.:.:.:.:.:.:.:.: |               |
| 3' AUUCUAGUACGACCGUCGAA----- 5'   | Csi-miR167b.3 |



Csi-miR167b.3, target=Cs2g15130.1 gene=Cs2g15130  
 Category:1  
 Score=3.5  
 Cleavage Site=3444

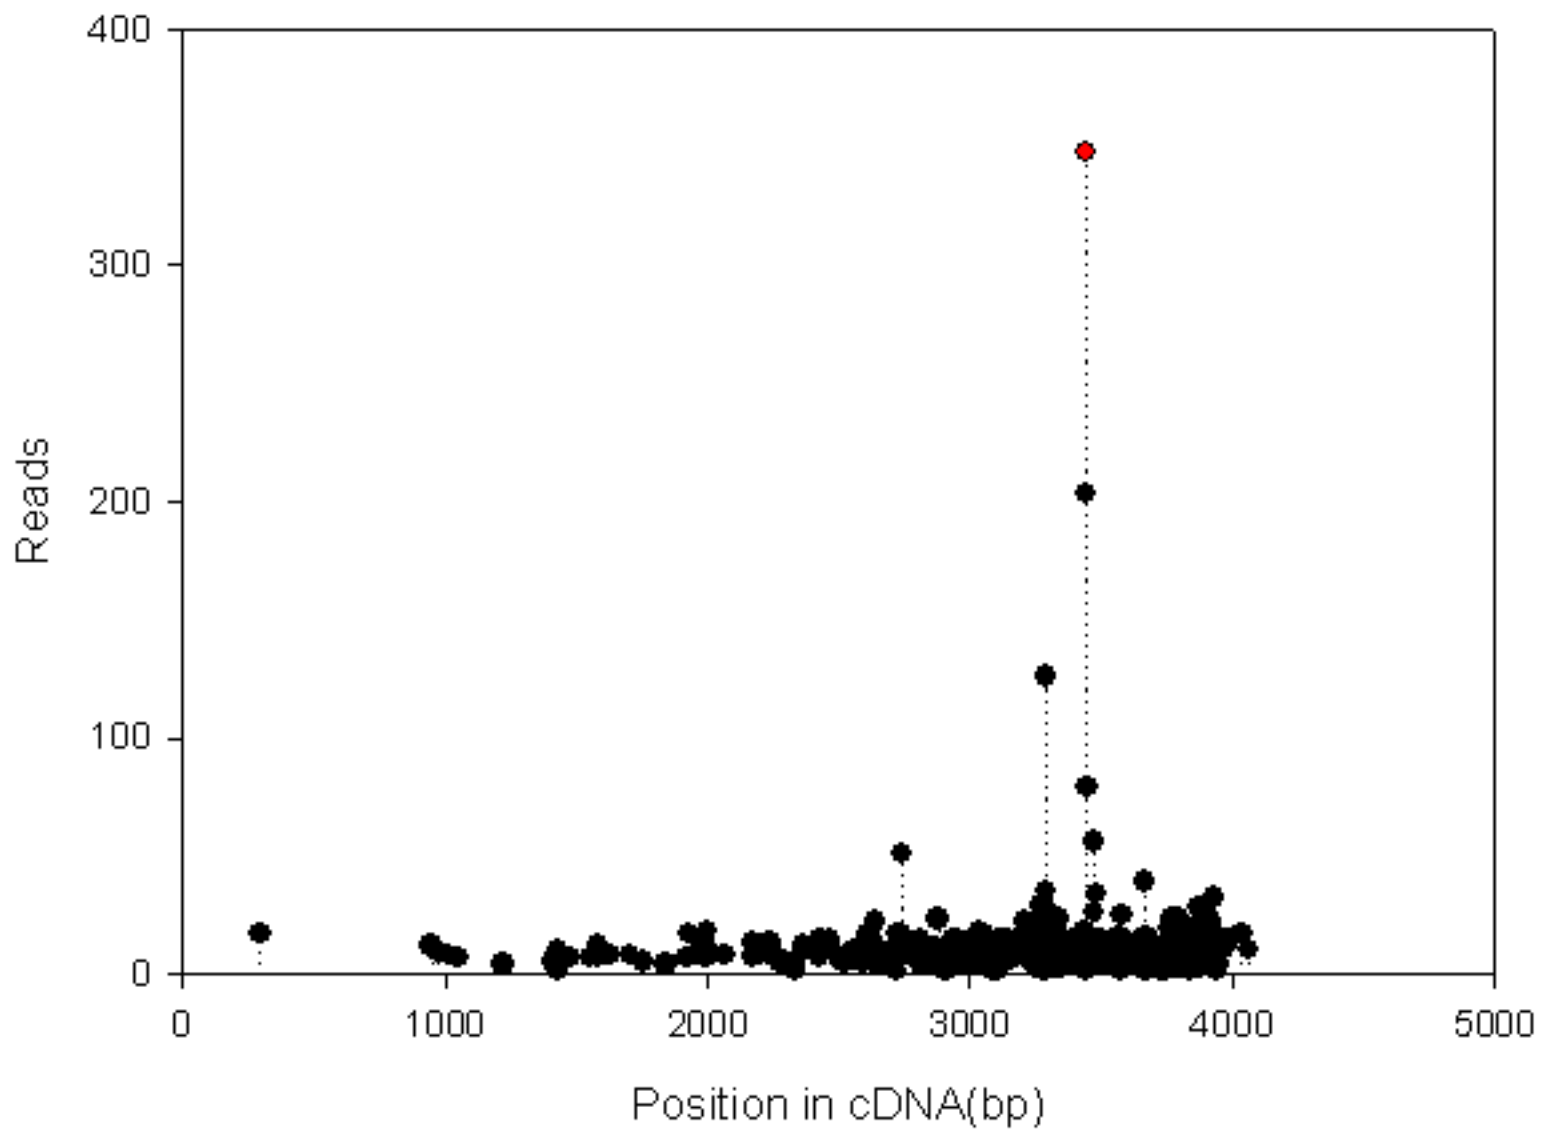

5' AGAGAUCAGGCUGGCAGCUUGUAUUU 3'  
 .::::: ::::::  
 3' AUUCUAGUACGACCGUCGAA----- 5'

Cs2g15130.1  
 Csi-miR167b.3

Csi-miR167b.3, target=Cs6g16030.1 gene=Cs6g16030  
 Category:2  
 Score=3  
 Cleavage Site=3357



```

5' UUAGAUCAGGCUGGCAGCUUGUAUUC 3'      Cs6g16030.1
  : : : : : : : : : : : : : :
3' AUUCUAGUACGACCGUCGAA----- 5'      Csi-miR167b.3

```

Csi-miR167b.4, target=Cs1g09030.1 gene=Cs1g09030  
 Category:2  
 Score=5  
 Cleavage Site=1248



```

5' GUGAAAUCAAGCUGGCAGACUUCGGC 3'      Cs1g09030.1
   ..  ....  :.....  :.....
3' --UUCUAGUACGACCGUC-GAAGU-- 5'      Csi-miR167b.4
  
```

Csi-miR167b.4, target=Cs2g09440.1 gene=Cs2g09440  
 Category:3  
 Score=4.5  
 Cleavage Site=3257



```

5' UGAGAUCAGGCUGGCAGCUUGUAUUC 3'          Cs2g09440.1
   .: .: .: .: .: .: .: .: .: .: .: .: .: .:
3' -UUCUAGUACGACCGUCGAA-GU--- 5'          Csi-miR167b.4
  
```

Csi-miR167b.4, target=Cs2g15130.1 gene=Cs2g15130  
 Category:1  
 Score=4.5  
 Cleavage Site=3444

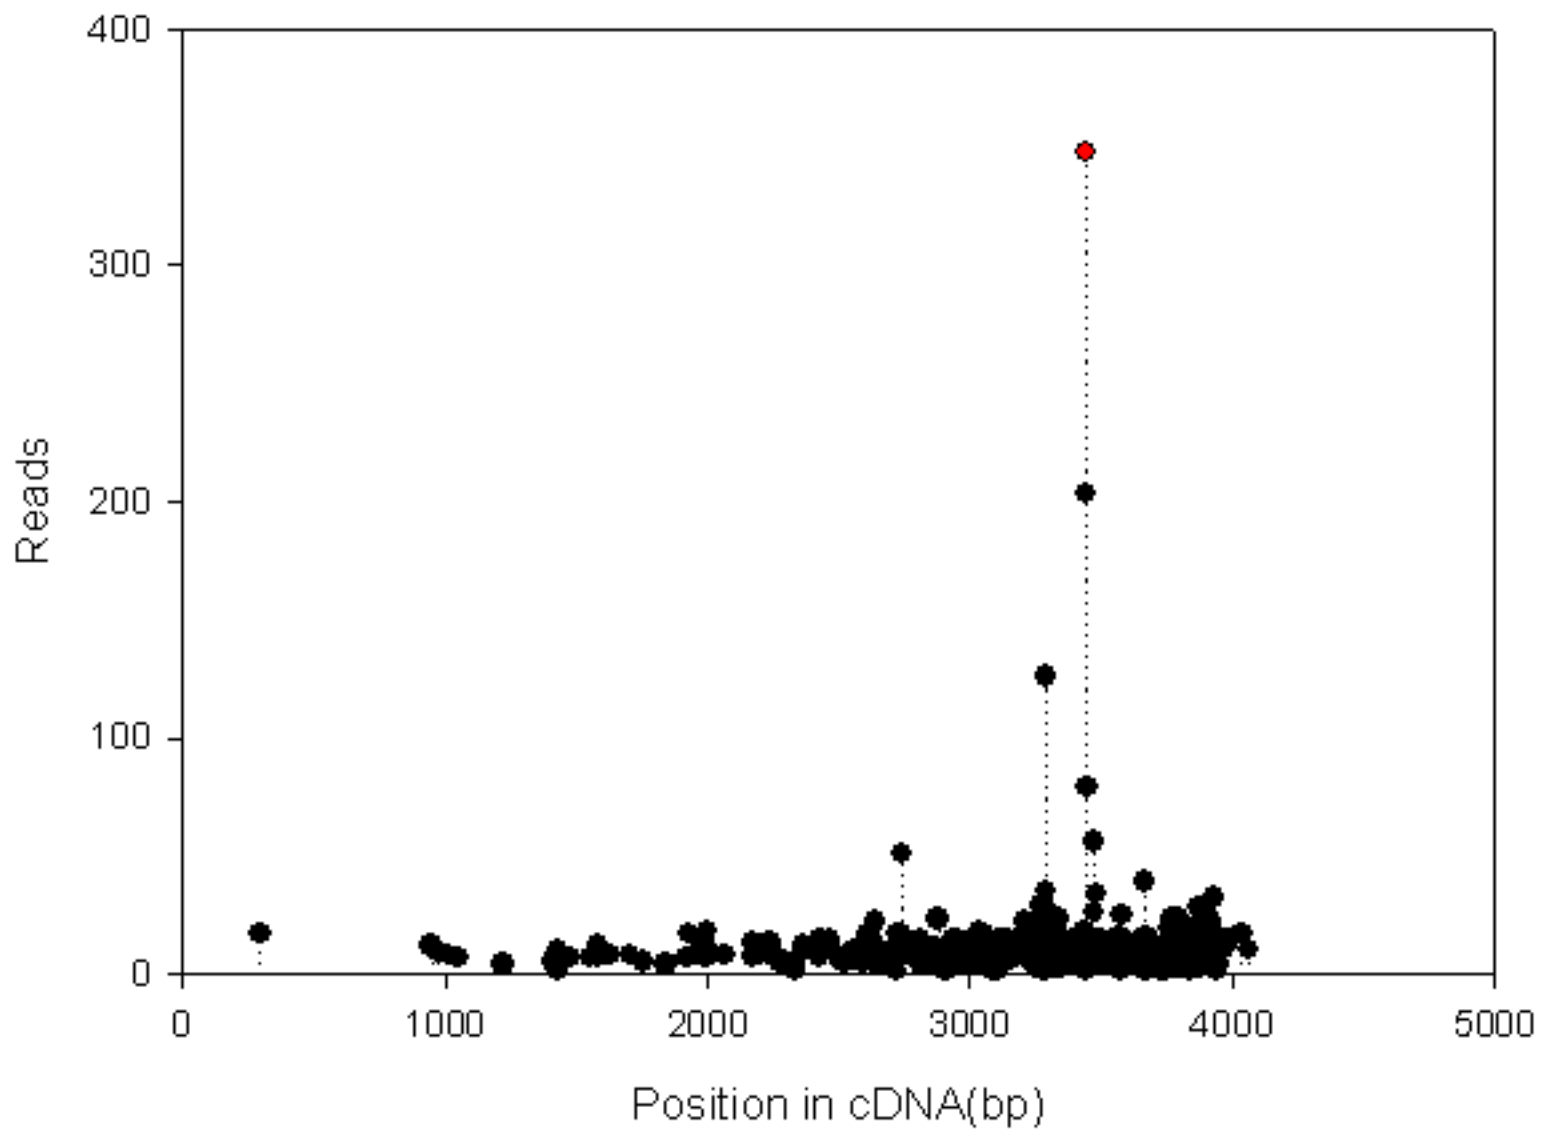

```

5' AGAGAUCAGGCUGGCAGCUUGUAUUU 3'      Cs2g15130.1
   .: : : : : : : : : : : : : : : : :
3' -UUCUAGUACGACCGUCGAA-GU--- 5'      Csi-miR167b.4
  
```

Csi-miR167b.4, target=Cs6g16030.1 gene=Cs6g16030  
 Category:2  
 Score=5  
 Cleavage Site=3357

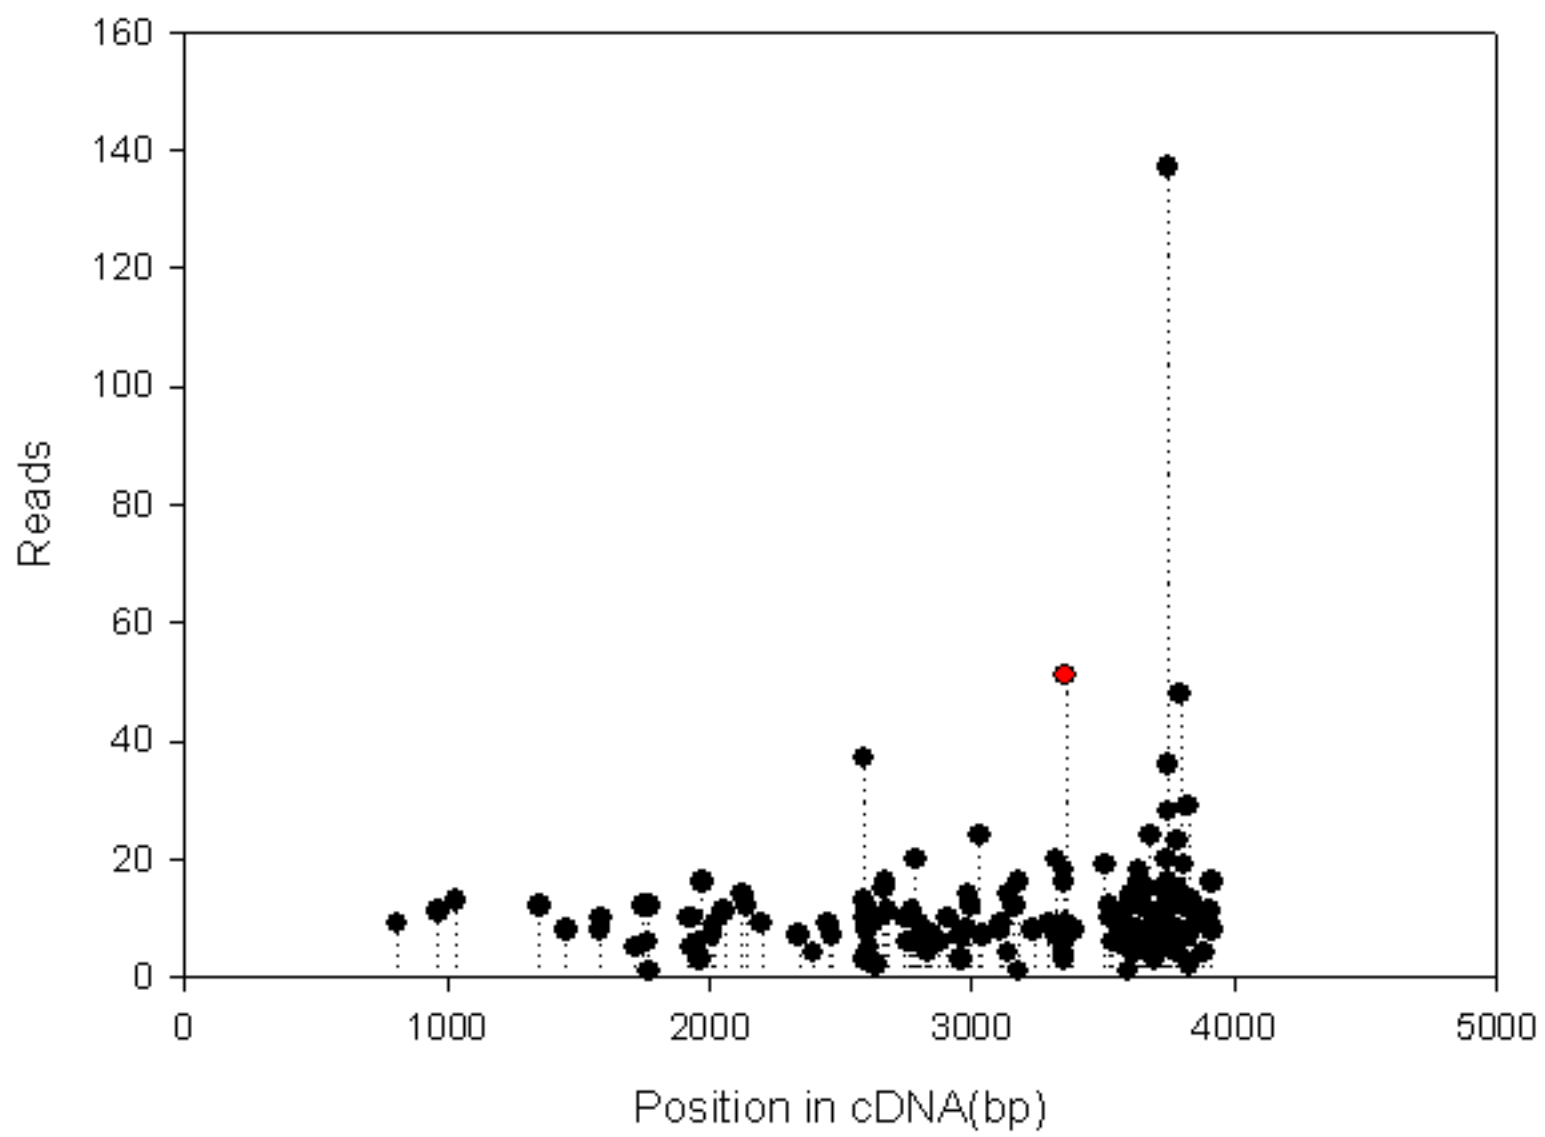

```

5' UUAGAUCAGGCUGGCAGCUUGUAUUC 3'          Cs6g16030.1
   ::::: ::::::::::: .:
3' -UUCUAGUACGACCGUCGAA-GU--- 5'          Csi-miR167b.4
  
```

Csi-miR167d.1, target=Cs2g09440.1 gene=Cs2g09440  
 Category:3  
 Score=5  
 Cleavage Site=3257



```

5' UGAGAUCAGGCUGGCAGCUUGUAUUC 3'      Cs2g09440.1
   : : : : : : : : : : : : : : : : :
3' AGUCUAGUACGACCGUCGAA-GU--- 5'      Csi-miR167d.1

```

Csi-miR167d.1, target=Cs6g16030.1 gene=Cs6g16030  
 Category:2  
 Score=4.5  
 Cleavage Site=3357



```

5' UUAGAUCAGGCUGGCAGCUUGUAUUC 3'          Cs6g16030.1
   : : : : : : : : : : : : : : : : : :
3' AGUCUAGUACGACCGUCGAA-GU--- 5'          Csi-miR167d.1

```



Csi-miR167d.2, target=Cs2g09440.1 gene=Cs2g09440  
 Category:3  
 Score=5  
 Cleavage Site=3257



```

5'  UGAGAUCAGGCUGGCAGCUUGUAUUC  3'      Cs2g09440.1
      :::::  :::::::::::  .:
3'  -GUCUAGUACGACCGUCGAA-GU---  5'      Csi-miR167d.2
  
```

Csi-miR167d.2, target=Cs2g15130.1 gene=Cs2g15130  
 Category:1  
 Score=5  
 Cleavage Site=3444



```

5' AGAGAUCAGGCUGGCAGCUUGUAUUU 3'      Cs2g15130.1
   ::::: :::::::::::::: .:
3' -GUCUAGUACGACCGUCGAA-GU--- 5'      Csi-miR167d.2
  
```

Csi-miR167d.2, target=Cs6g16030.1 gene=Cs6g16030  
 Category:2  
 Score=4.5  
 Cleavage Site=3357



```

5' UUAGAUCAGGCUGGCAGCUUGUAUUC 3'      Cs6g16030.1
   .: .: .: .: .: .: .: .: .: .: .: .:
3' -GUCUAGUACGACCGUCGAA-GU--- 5'      Csi-miR167d.2

```

Csi-miR168a, target=Cs5g16710.1 gene=Cs5g16710  
 Category:3  
 Score=5  
 Cleavage Site=797

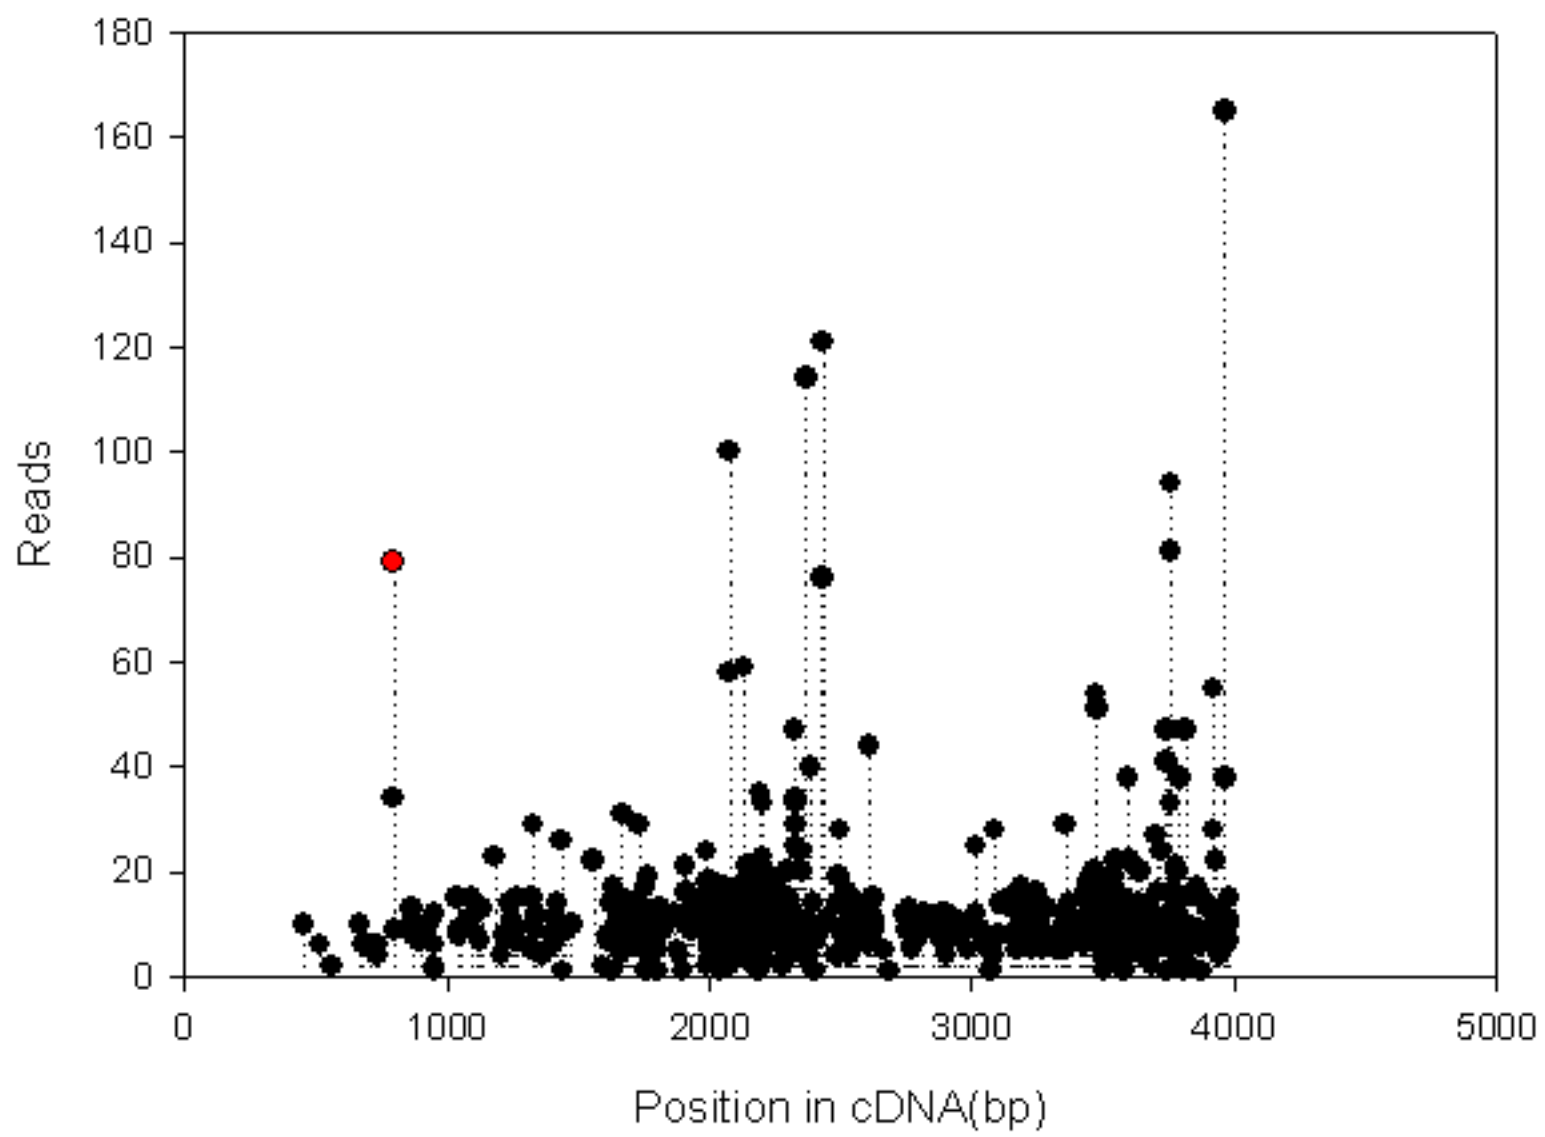

```

5' AUUCCCGAGCUACACCAAGCAACCCC 3'      Cs5g16710.1
   :::::::::: :: ::::::::::: :
3' -AAGGGCUGGACGUGGUUCGCU----- 5'      Csi-miR168a

```

Csi-miR168a, target=Orange1.1t00591.1 gene=Orange1.1t00591  
 Category:1  
 Score=3.5  
 Cleavage Site=500

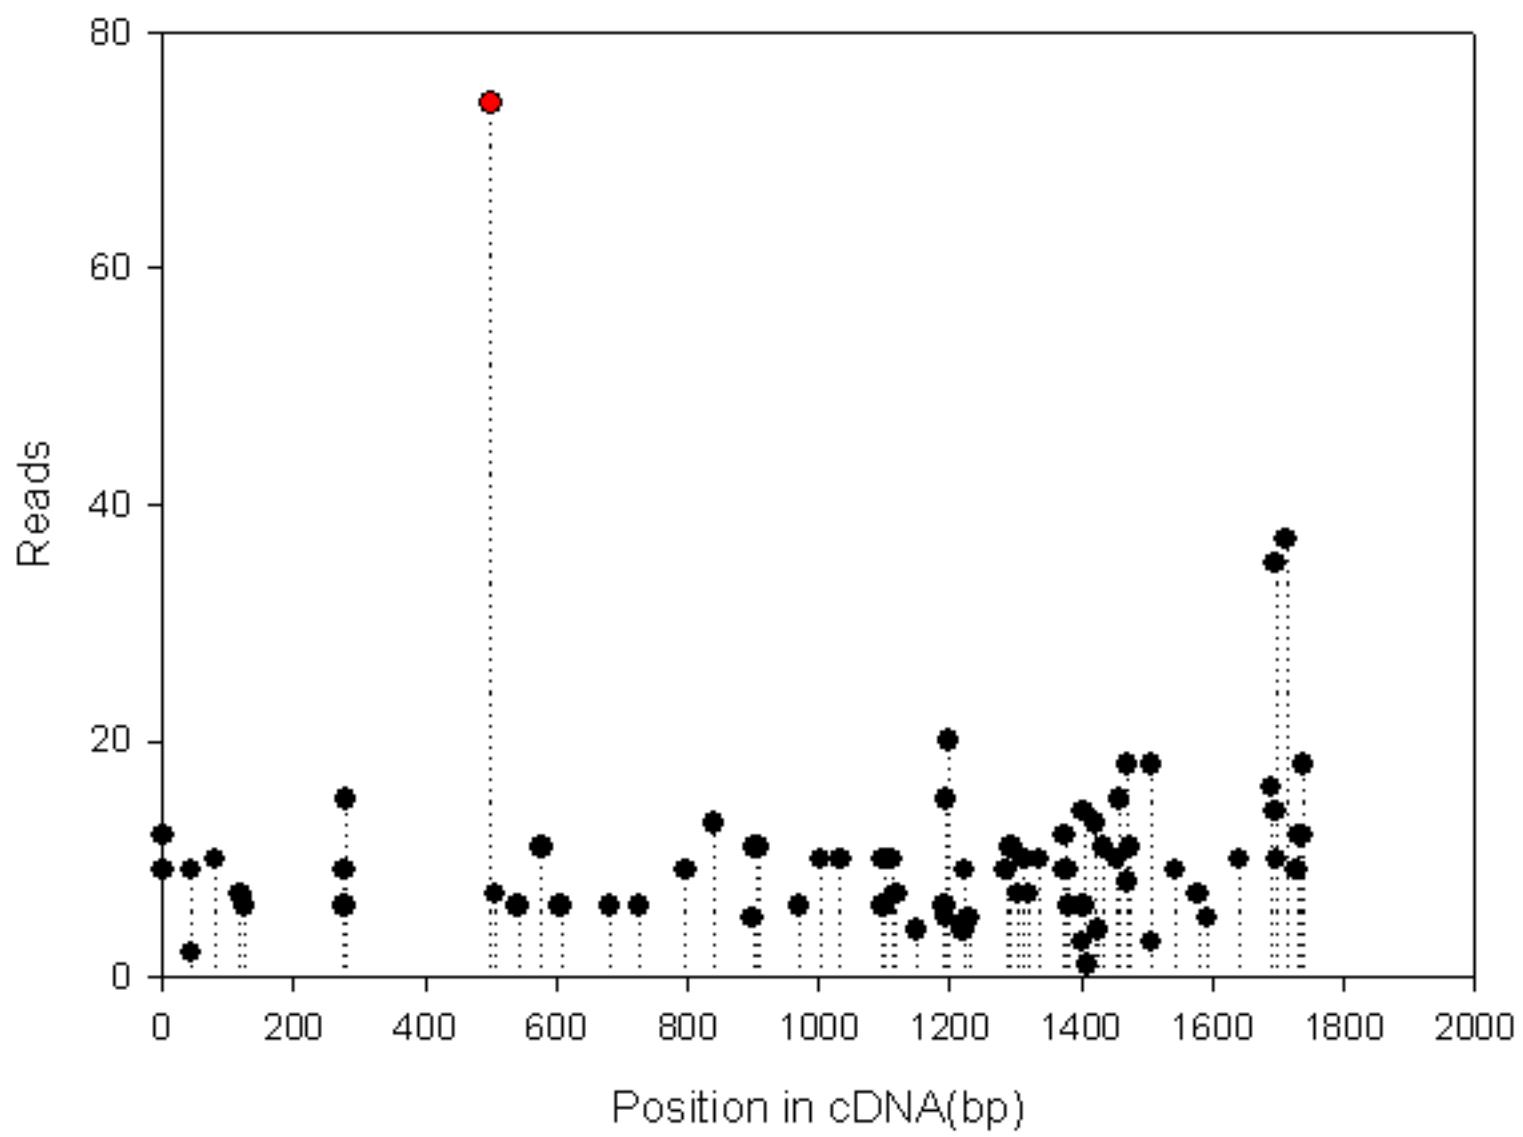

```

5' AUACCCGAGCUGCAUCAAGCGGACAU 3'      Orange1.1t00591.1
   : : : : : : : : : : : : : : :
3' -AAGGGCUGGACGUGGUUCGCU---- 5'      Csi-miR168a
  
```

Csi-miR169b.1, target=Cs1g17780.1 gene=Cs1g17780  
 Category:1  
 Score=3  
 Cleavage Site=1200

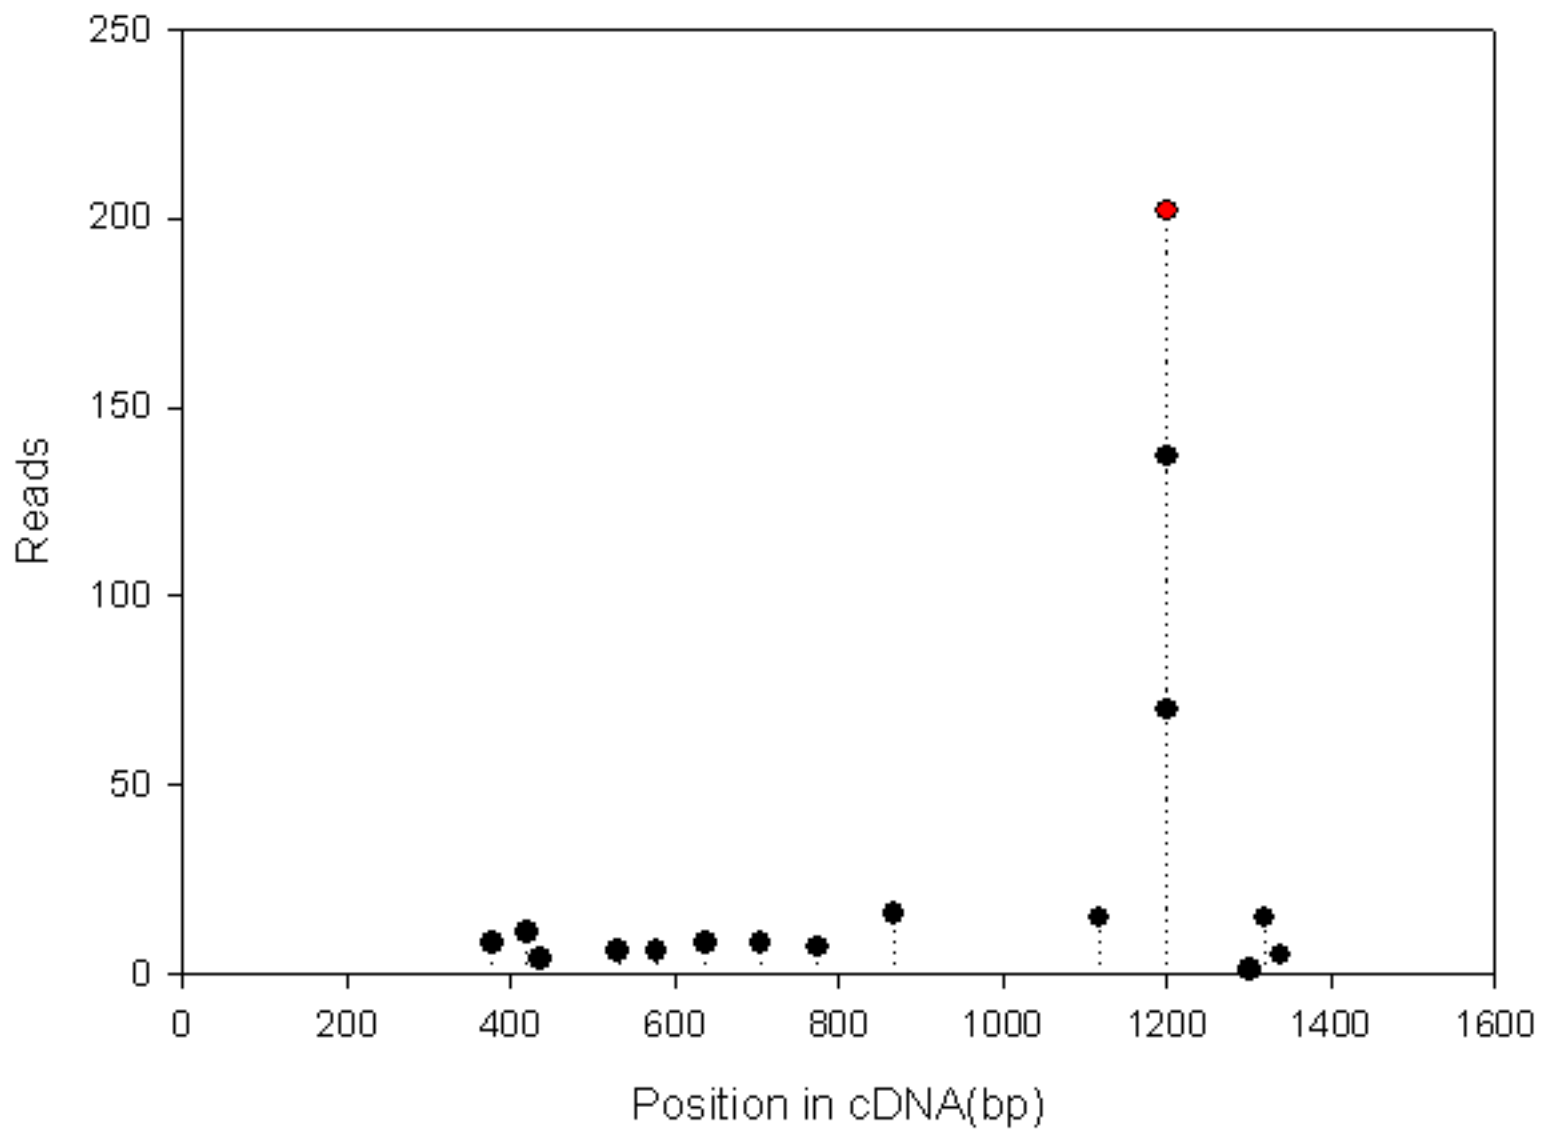

```

5' CUUGGG-AAGUCAUCCUUGGCUCUUUA 3'      Cs1g17780.1
   ..:: ::::::::::::::::::::
3' --GUCCGUUCAGUAGGAACCGAU---- 5'      Csi-miR169b.1
  
```

Csi-miR169b.1, target=Cs2g30350.1 gene=Cs2g30350  
 Category:1  
 Score=4  
 Cleavage Site=1229

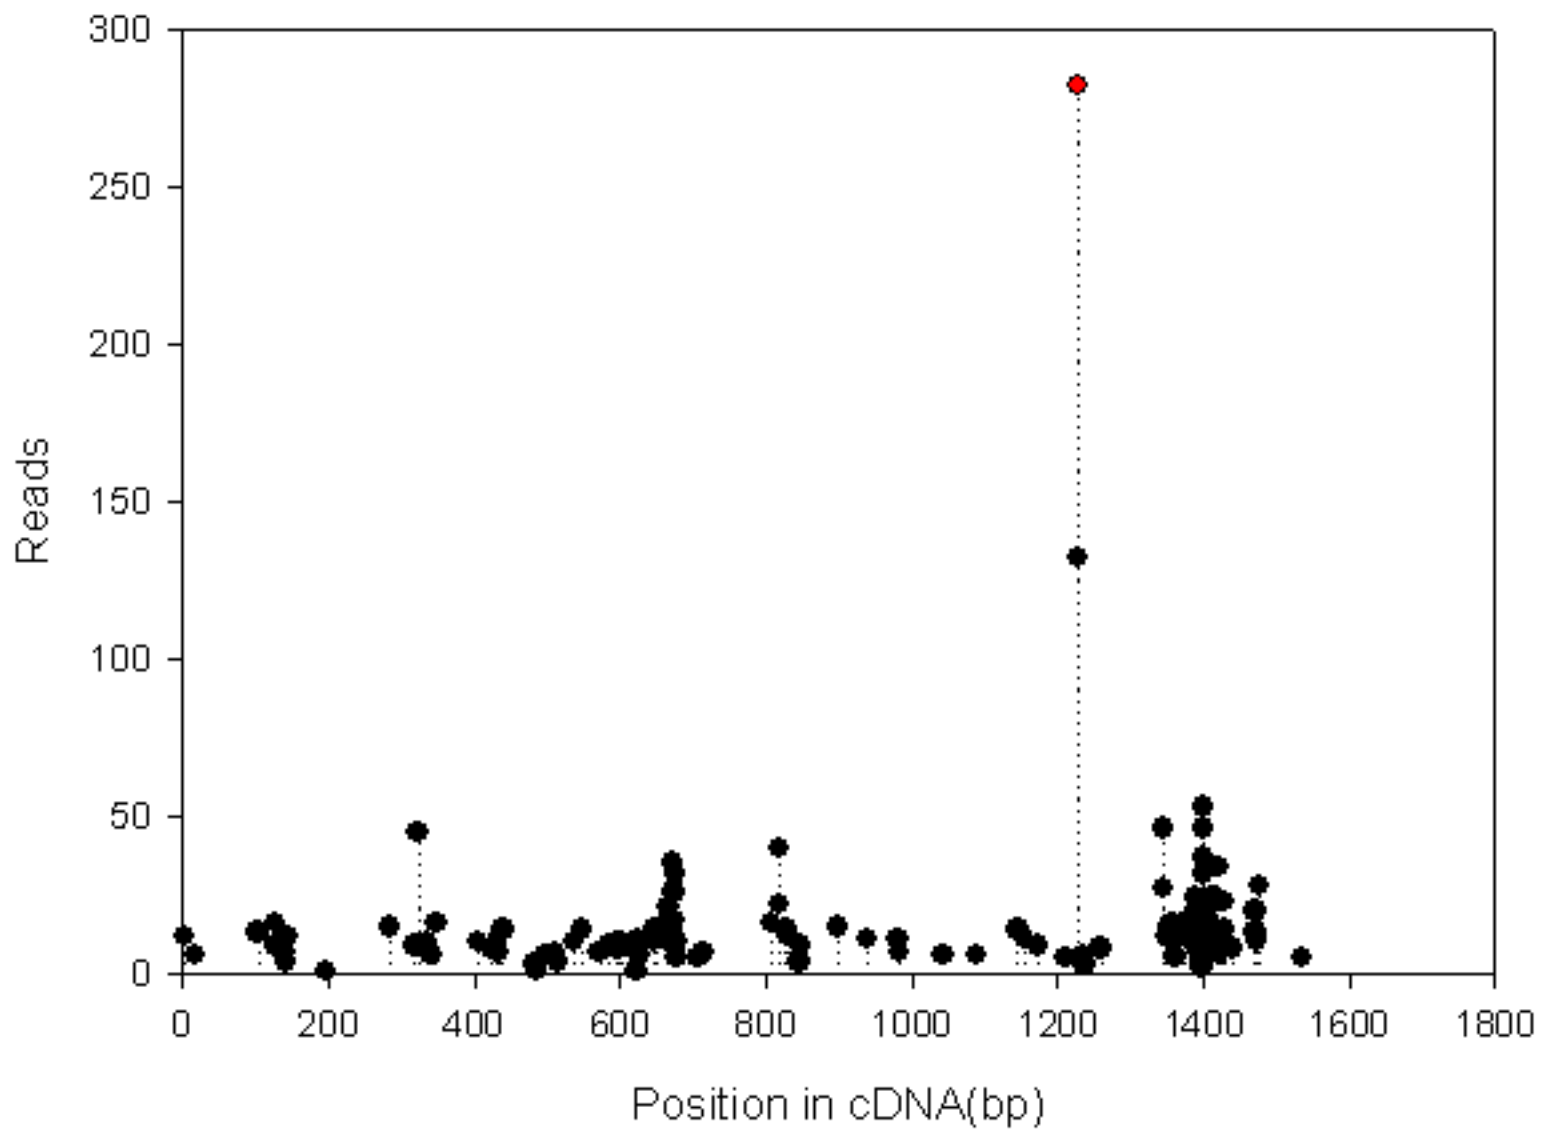

```

5' GCCGGCAAUCAUUCUUGGCUUCGUU 3'      Cs2g30350.1
   : : : : : : : : : : : : : : : :
3' -GUCCGUUCAGUAGGAACCGAU----- 5'   Csi-miR169b.1

```

Csi-miR169b.1, target=Cs6g13560.1 gene=Cs6g13560  
 Category:1  
 Score=3.5  
 Cleavage Site=1307

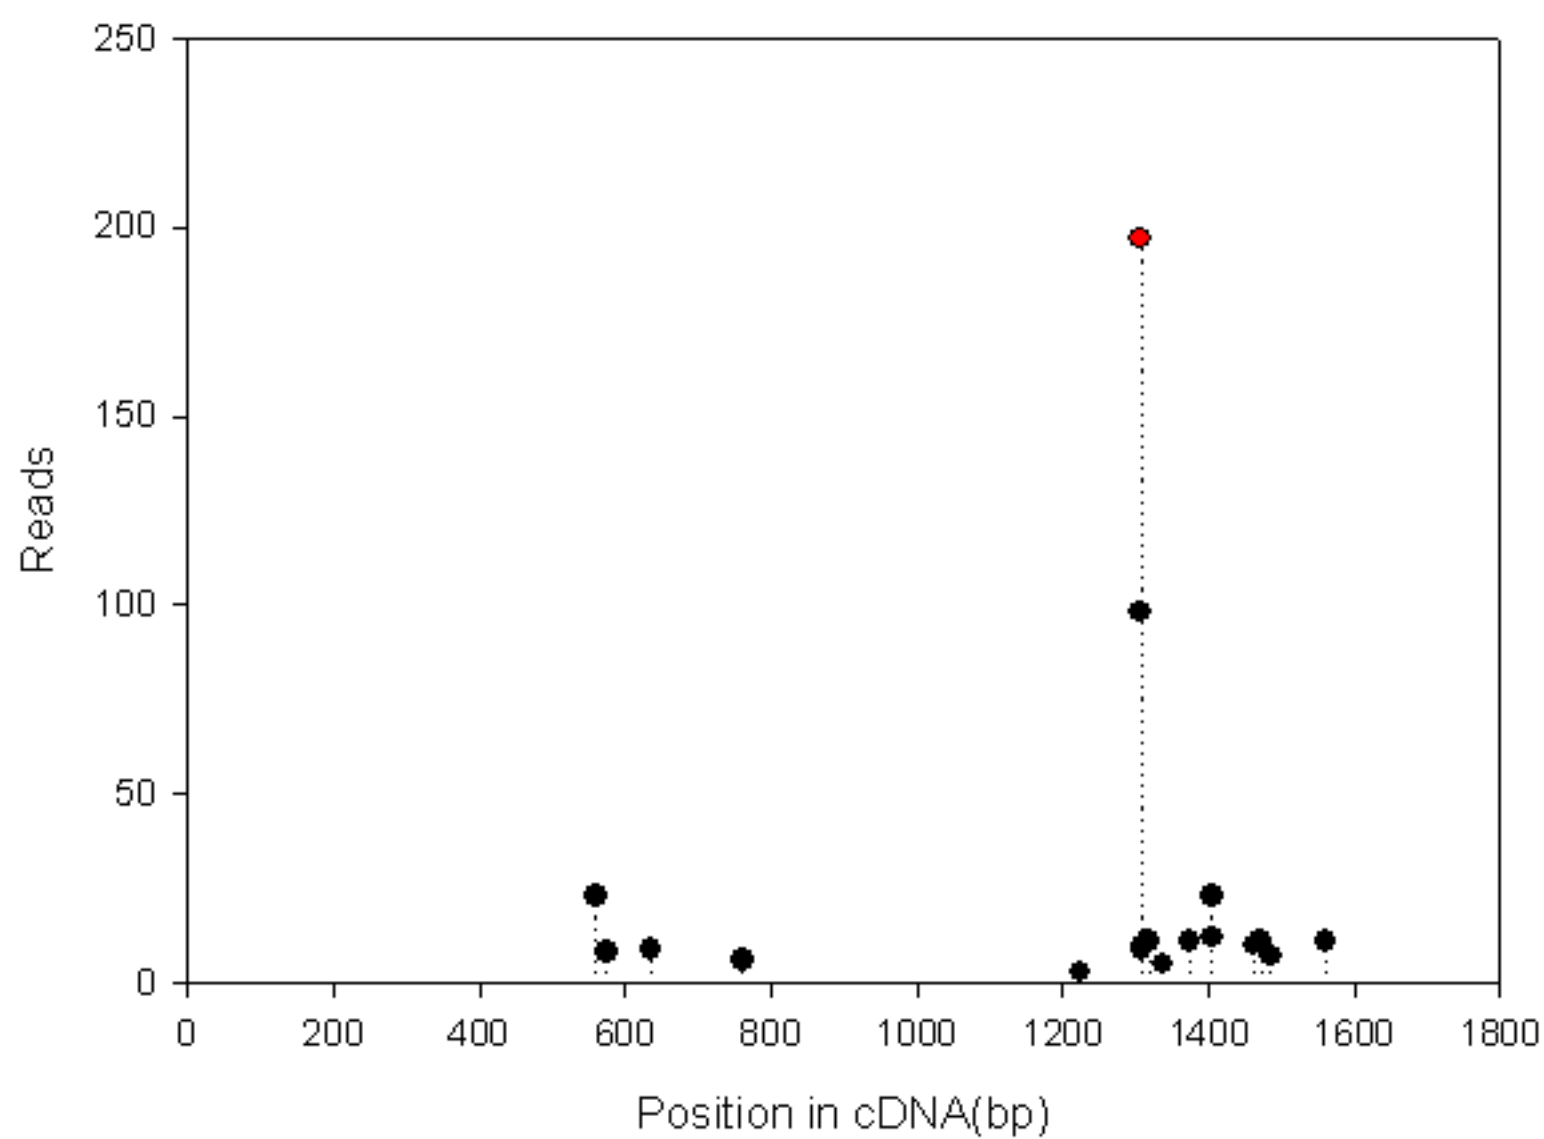

5' UUAGGCAAUUCUAUUCUUGGCUCAUCU 3'  
 .....  
 3' -GUCCGUUCAGUAGGAACCGAU----- 5'

Cs6g13560.1  
  
 Csi-miR169b.1



Csi-miR169b.1, target=Cs7g01720.1 gene=Cs7g01720  
 Category:1  
 Score=3  
 Cleavage Site=1331

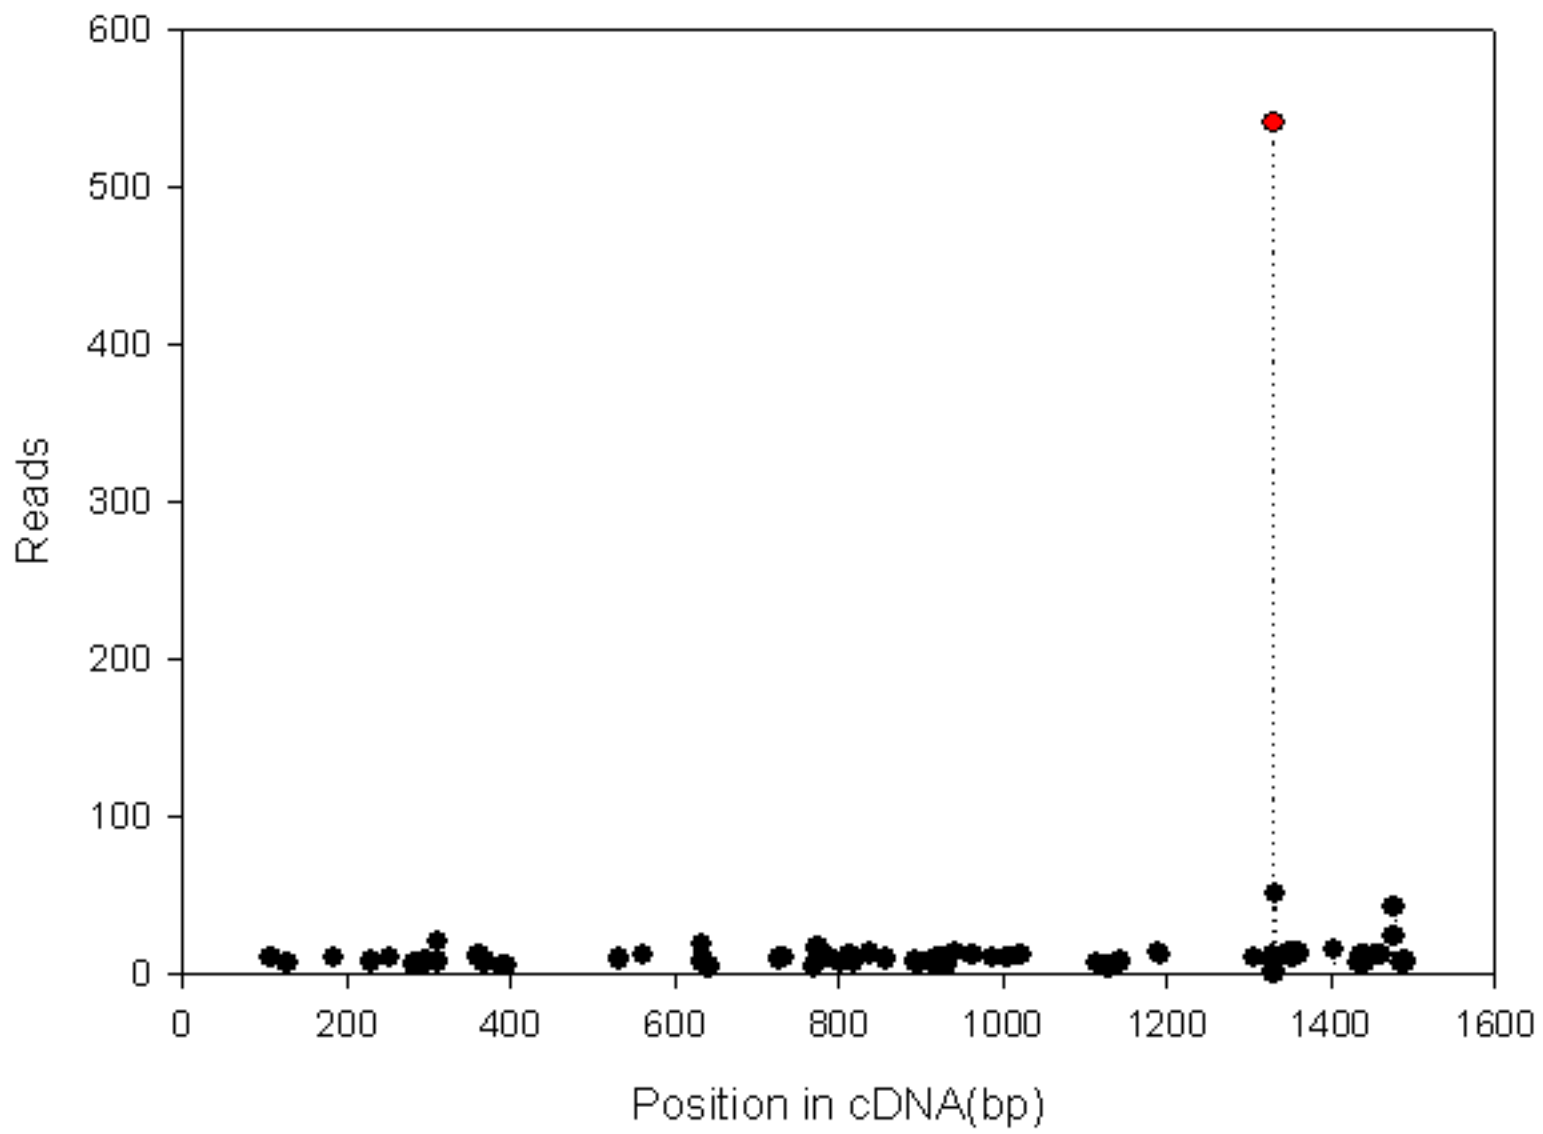

5' UCAGGCAAUUCAUUCUUGGCUUUGCA 3'  
 :::::::::: :::::::::::::::  
 3' -GUCCGUUCAGUAGGAACCGAU----- 5'

Cs7g01720.1

Csi-miR169b.1

Csi-miR169i.1, target=Cs1g17780.1 gene=Cs1g17780  
Category:1  
Score=3  
Cleavage Site=1200

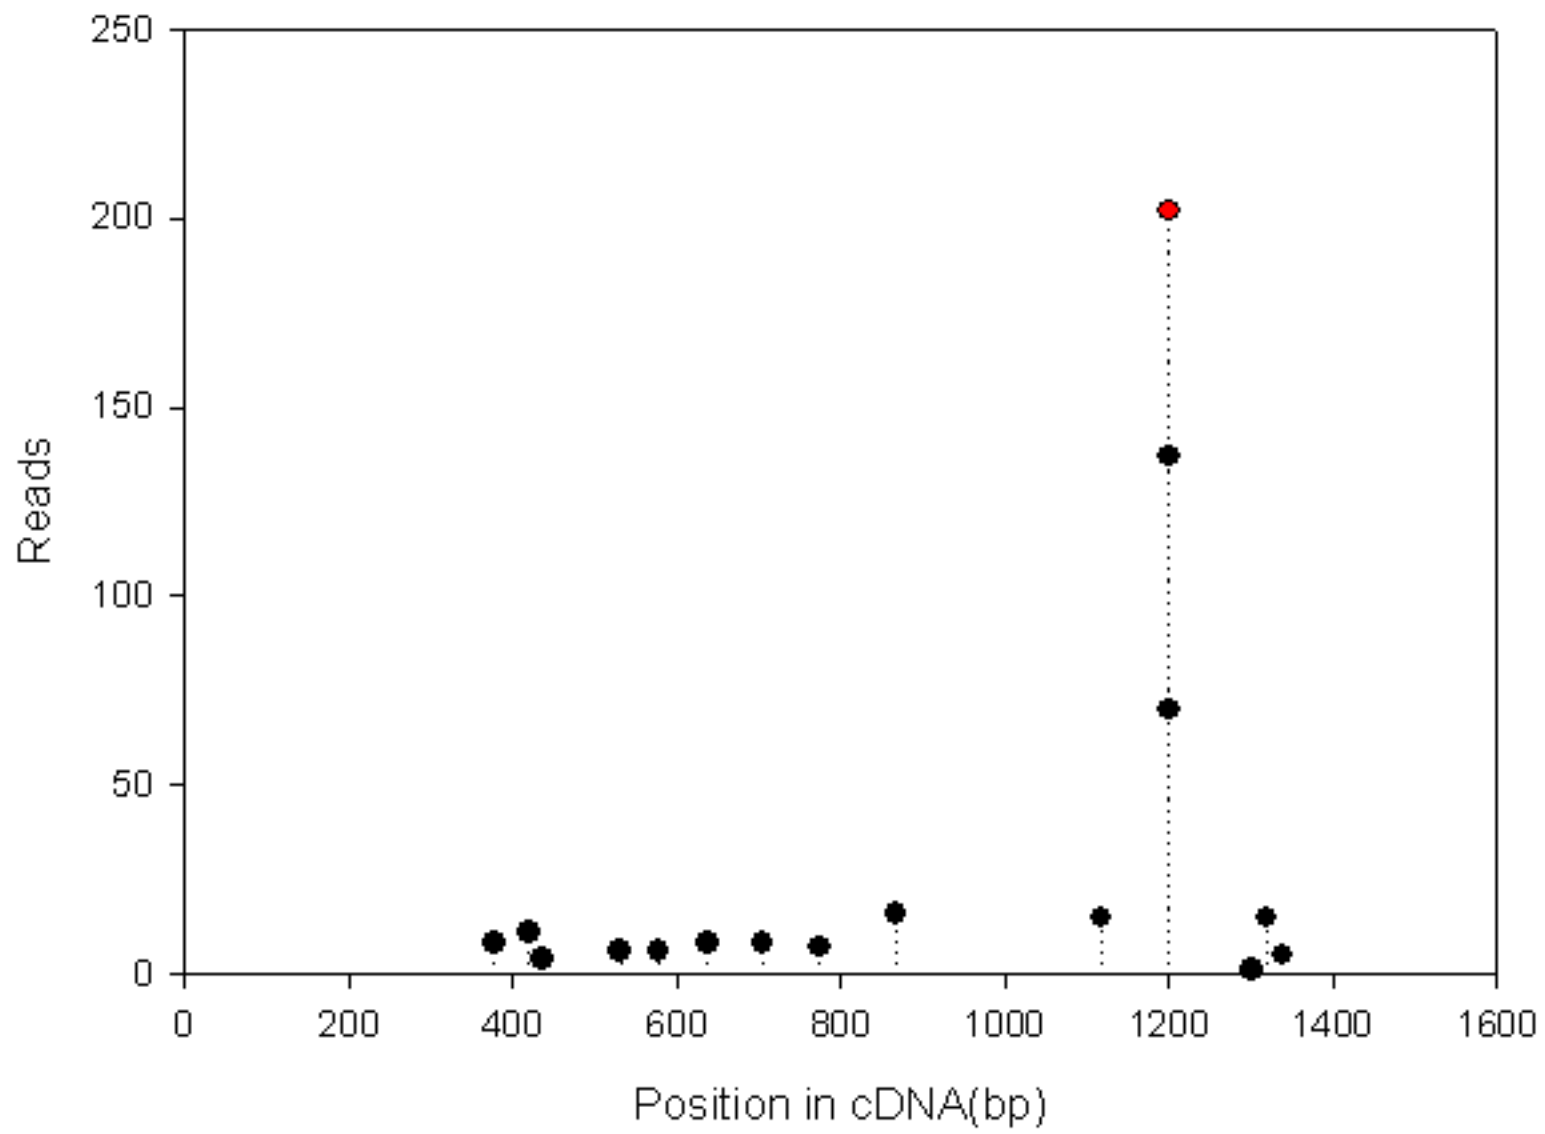

```
5' CUUGGG-AAGUCAUCCUUGGCUCUUUA 3' Cs1g17780.1
   :.:.:. :.:.:.:.:.:.:.:.:.:.
3' -AGUCCGUUCAGUAGGAACCGAU---- 5' Csi-miR169i.1
```

Csi-miR169i.1, target=Cs2g30350.1 gene=Cs2g30350  
 Category:1  
 Score=5  
 Cleavage Site=1229

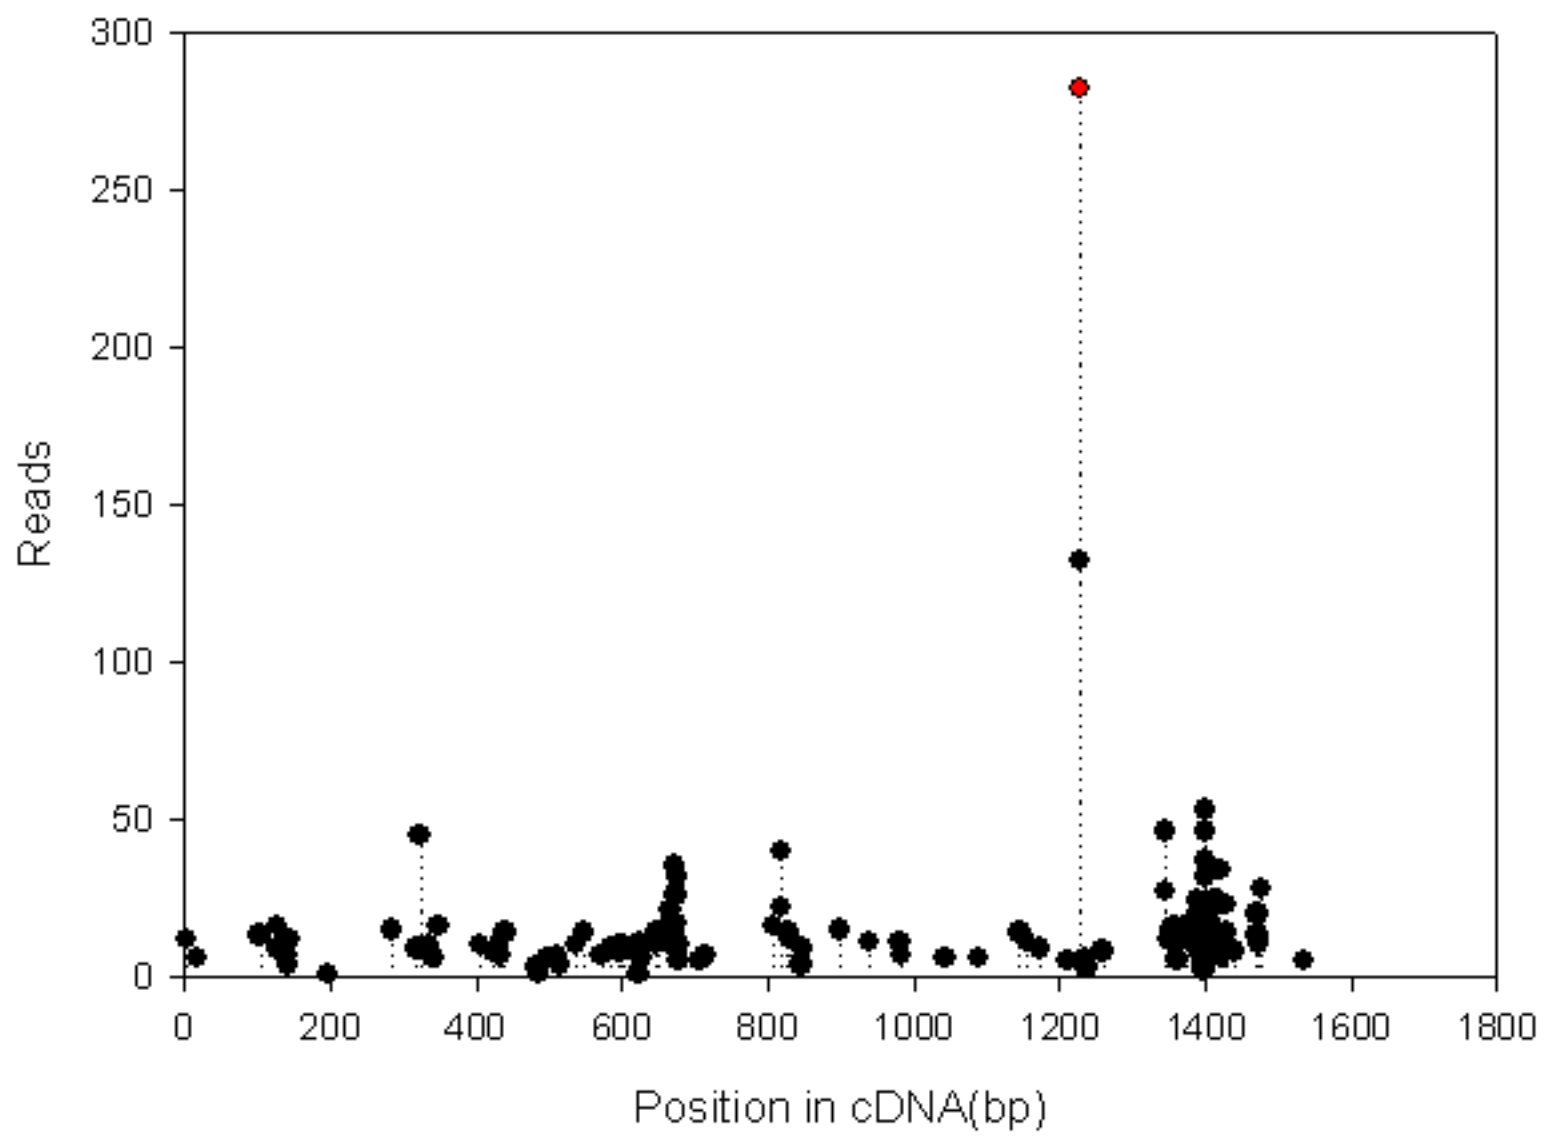

```

5' GCCGGCAAUAUCAUUCUUGGCUUCGUU 3'      Cs2g30350.1
   : : : : : : : : : : : : : : : :
3' AGUCCGUUCAGUAGGAACCGAU----- 5'    Csi-miR169i.1
  
```

Csi-miR169i.1, target=Cs6g13560.1 gene=Cs6g13560  
 Category:1  
 Score=3.5  
 Cleavage Site=1307

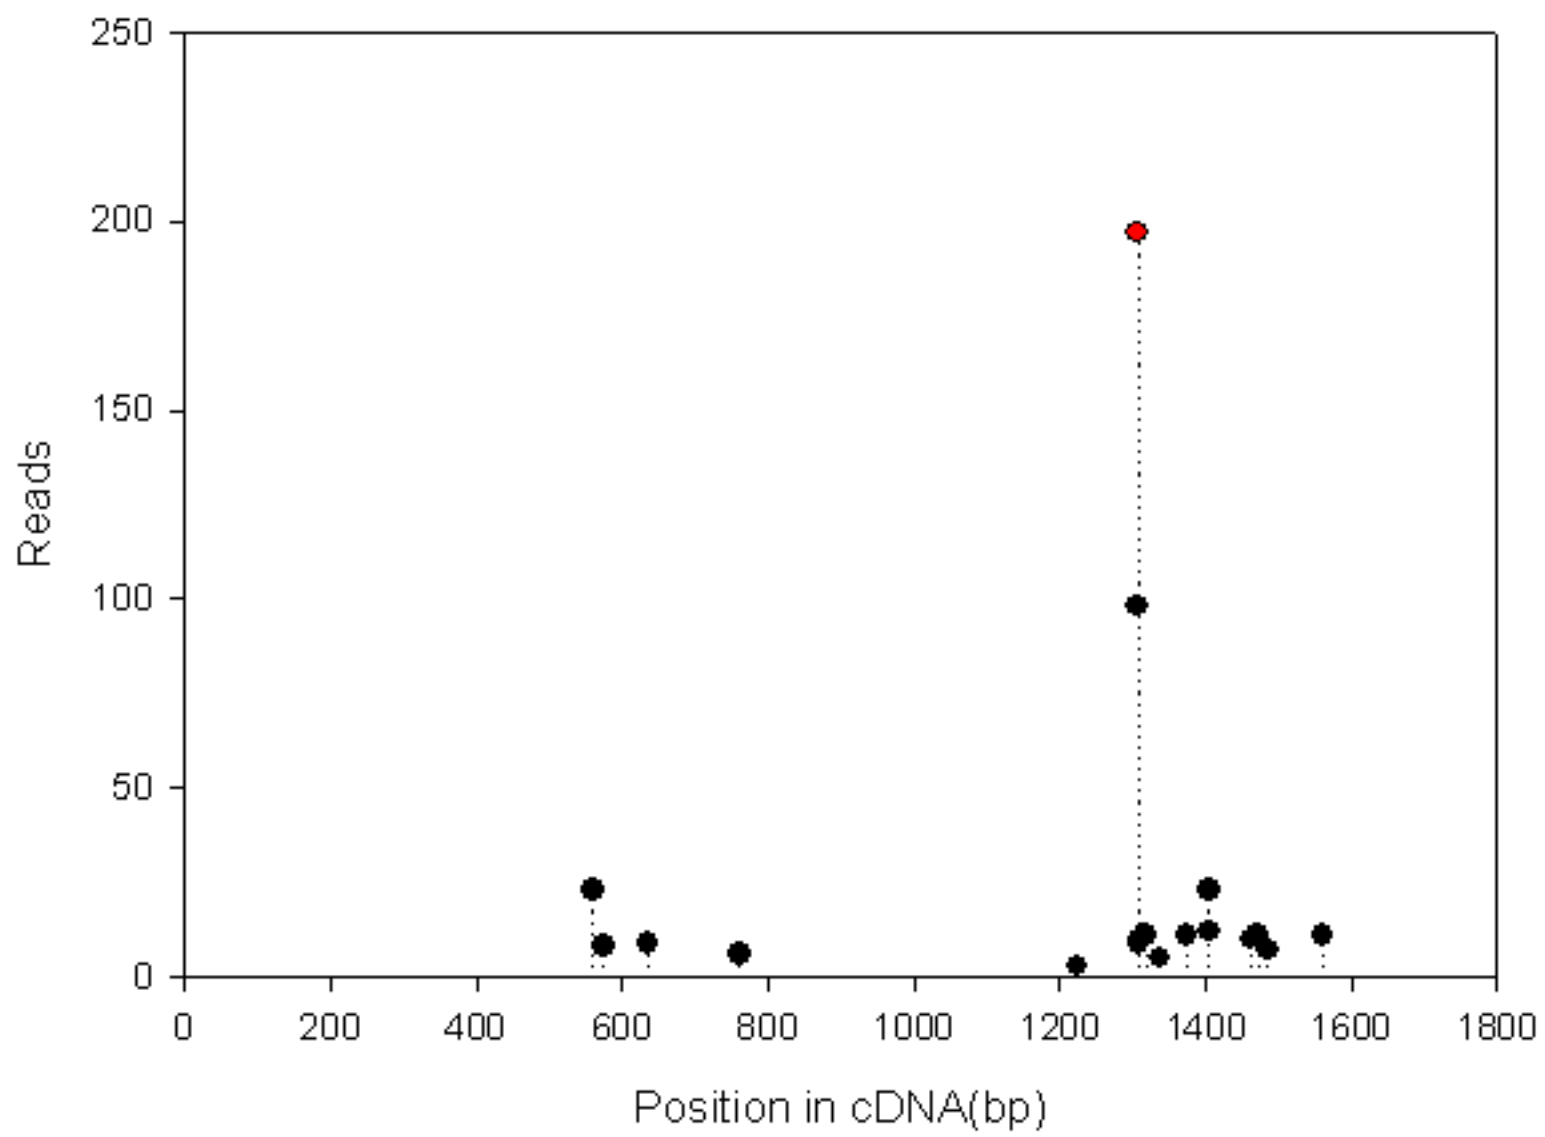

```

5' UUAGGCAAUAUCAUUCUUGGCUCAUCU 3'      Cs6g13560.1
   :.:.:.:.:.:.:.:.:.:.:.:.:.:.:.
3' AGUCCGUUCAGUAGGAACCGAU----- 5'     Csi-miR169i.1

```

Csi-miR169i.1, target=Cs7g01720.1 gene=Cs7g01720  
 Category:1  
 Score=3  
 Cleavage Site=1331

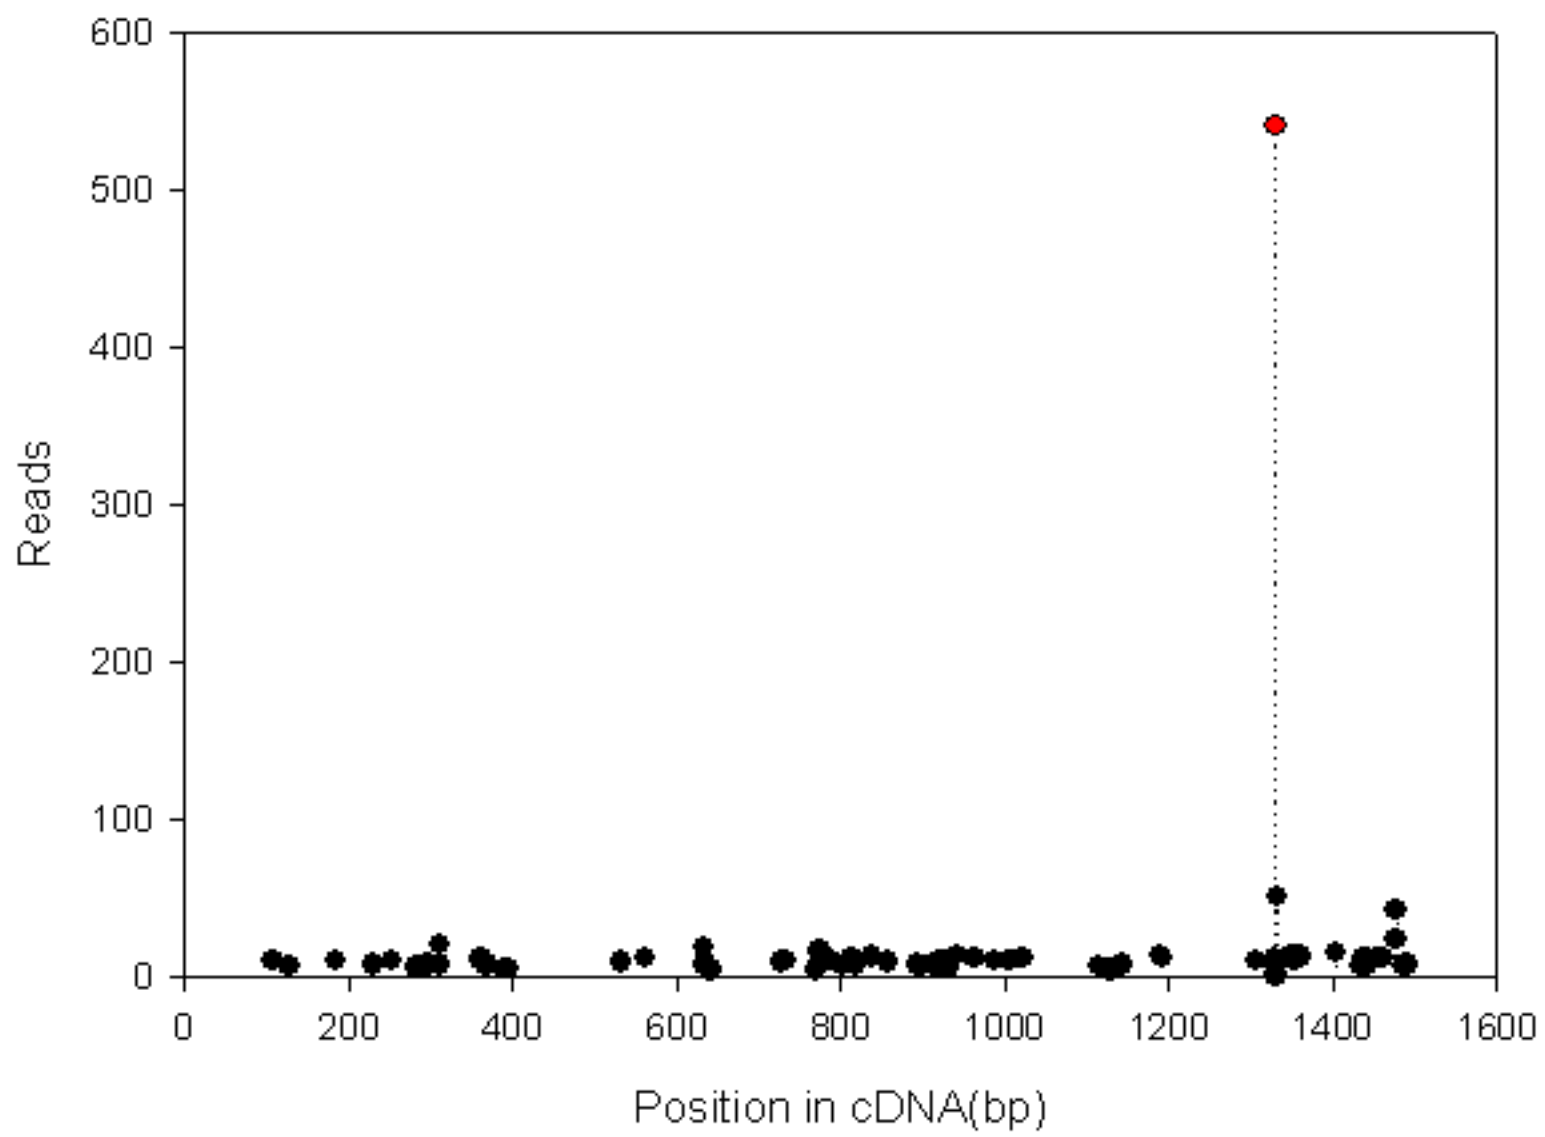

```

5' UCAGGCAAUUCAUUCUUGGCUUUGCA 3'      Cs7g01720.1
   ::::::::::: :::::::::::
3' AGUCCGUUCAGUAGGAACCGAU----- 5'    Csi-miR169i.1

```

Csi-miR169m.1, target=Cs1g17780.1 gene=Cs1g17780  
 Category:1  
 Score=3  
 Cleavage Site=1200

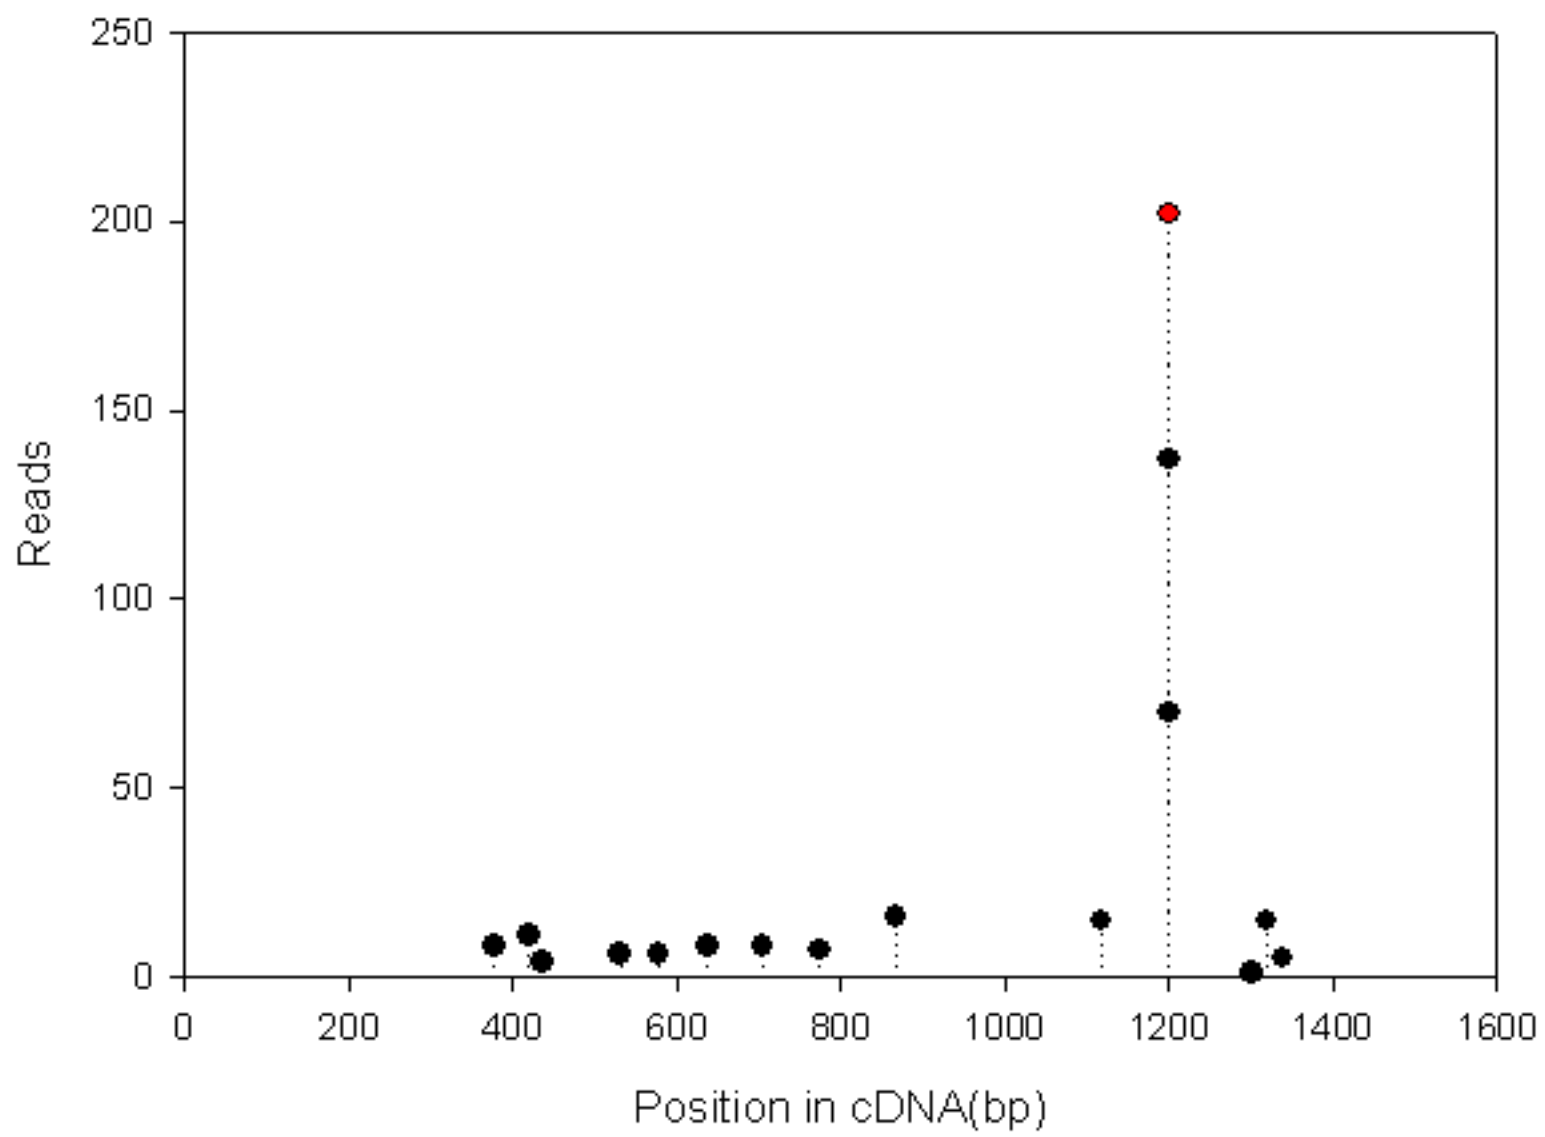

```

5' CUUGGGAAGUCAUCCUUGGCUCUUUA 3'      Cs1g17780.1
   . . . . . : : : : : : : : : : : :
3' -GGCCGUUCAGUAGGAACCGAC----- 5'    Csi-miR169m.1
  
```

Csi-miR169m.1, target=Cs2g30350.1 gene=Cs2g30350  
 Category:1  
 Score=3  
 Cleavage Site=1229



```

5' GCCGGCAAUUAUUCUUGGCUUCGUU 3'          Cs2g30350.1
   :::::::::: ::::::::::::::::::::
3' -GGCCGUUCAGUAGGAACCGAC----- 5'      Csi-miR169m.1

```

Csi-miR169m.1, target=Cs6g13560.1 gene=Cs6g13560  
 Category:1  
 Score=4.5  
 Cleavage Site=1307



```

5' UUAGGCAAUUCAUUCUUGGCUCAUCU 3'      Cs6g13560.1
   . : : : : : : : : : : : : : : :
3' -GGCCGUUCAGUAGGAACCGAC----- 5'    Csi-miR169m.1
  
```



Csi-miR169m.1, target=Cs7g01720.1 gene=Cs7g01720  
 Category:1  
 Score=4  
 Cleavage Site=1331



```

5' UCAGGCAAUUCAUUCUUGGCUUUGCA 3'          Cs7g01720.1
   : : : : : : : : : : : : : : :
3' -GGCCGUUCAGUAGGAACCGAC----- 5'      Csi-miR169m.1

```

Csi-miR169m.2, target=Cs1g17780.1 gene=Cs1g17780  
 Category:1  
 Score=3  
 Cleavage Site=1200



5' CUUGGGAAGUCAUCCUUGGCUCUUUA 3'

Cs1g17780.1

..:: ::::::::::::::::::::

3' CGGCCGUUCAGUAGGAACCGA----- 5'

Csi-miR169m.2

Csi-miR169m.2, target=Cs2g30350.1 gene=Cs2g30350  
 Category:1  
 Score=3  
 Cleavage Site=1229



|    |            |            |            |    |               |
|----|------------|------------|------------|----|---------------|
| 5' | GCCGGCAAU  | CAUUCU     | UGGCUUCGUU | 3' | Cs2g30350.1   |
|    | :::::::::: | :::::::::: |            |    |               |
| 3' | CGGCCGUUC  | AGUAGGA    | ACCGA----- | 5' | Csi-miR169m.2 |

Csi-miR169m.2, target=Cs7g01720.1 gene=Cs7g01720  
 Category:1  
 Score=5  
 Cleavage Site=1331



5' UCAGGCAAUUCAUUCUUGGCCUUUGCA 3'  
 : : : : : : : : : : : : : : : : :  
 3' CGGCCGUUCAGUAGGAACCGA----- 5'

Cs7g01720.1

Csi-miR169m.2

Csi-miR169m.3, target=Cs1g17780.1 gene=Cs1g17780  
 Category:1  
 Score=4  
 Cleavage Site=1200



```

5' CUUGGGAAGUCAUCCUUGGCUCUUUA 3'      Cs1g17780.1
   .:: :::::::::::::::::::: .
3' --GCCGUUCAGUAGGAACCGACG--- 5'      Csi-miR169m.3
  
```

Csi-miR169m.3, target=Cs2g30350.1 gene=Cs2g30350  
 Category:1  
 Score=4  
 Cleavage Site=1229



```

5' GCCGGCAAUCAAUUCUUGGCUUCGUU 3' Cs2g30350.1
   ::::: ::::: ::::: ::::: :::::
3' --GCCGUUCAGUAGGAACCGACG--- 5' Csi-miR169m.3
  
```

Csi-miR171d, target=Cs5g08980.1 gene=Cs5g08980  
 Category:1  
 Score=2.5  
 Cleavage Site=1697

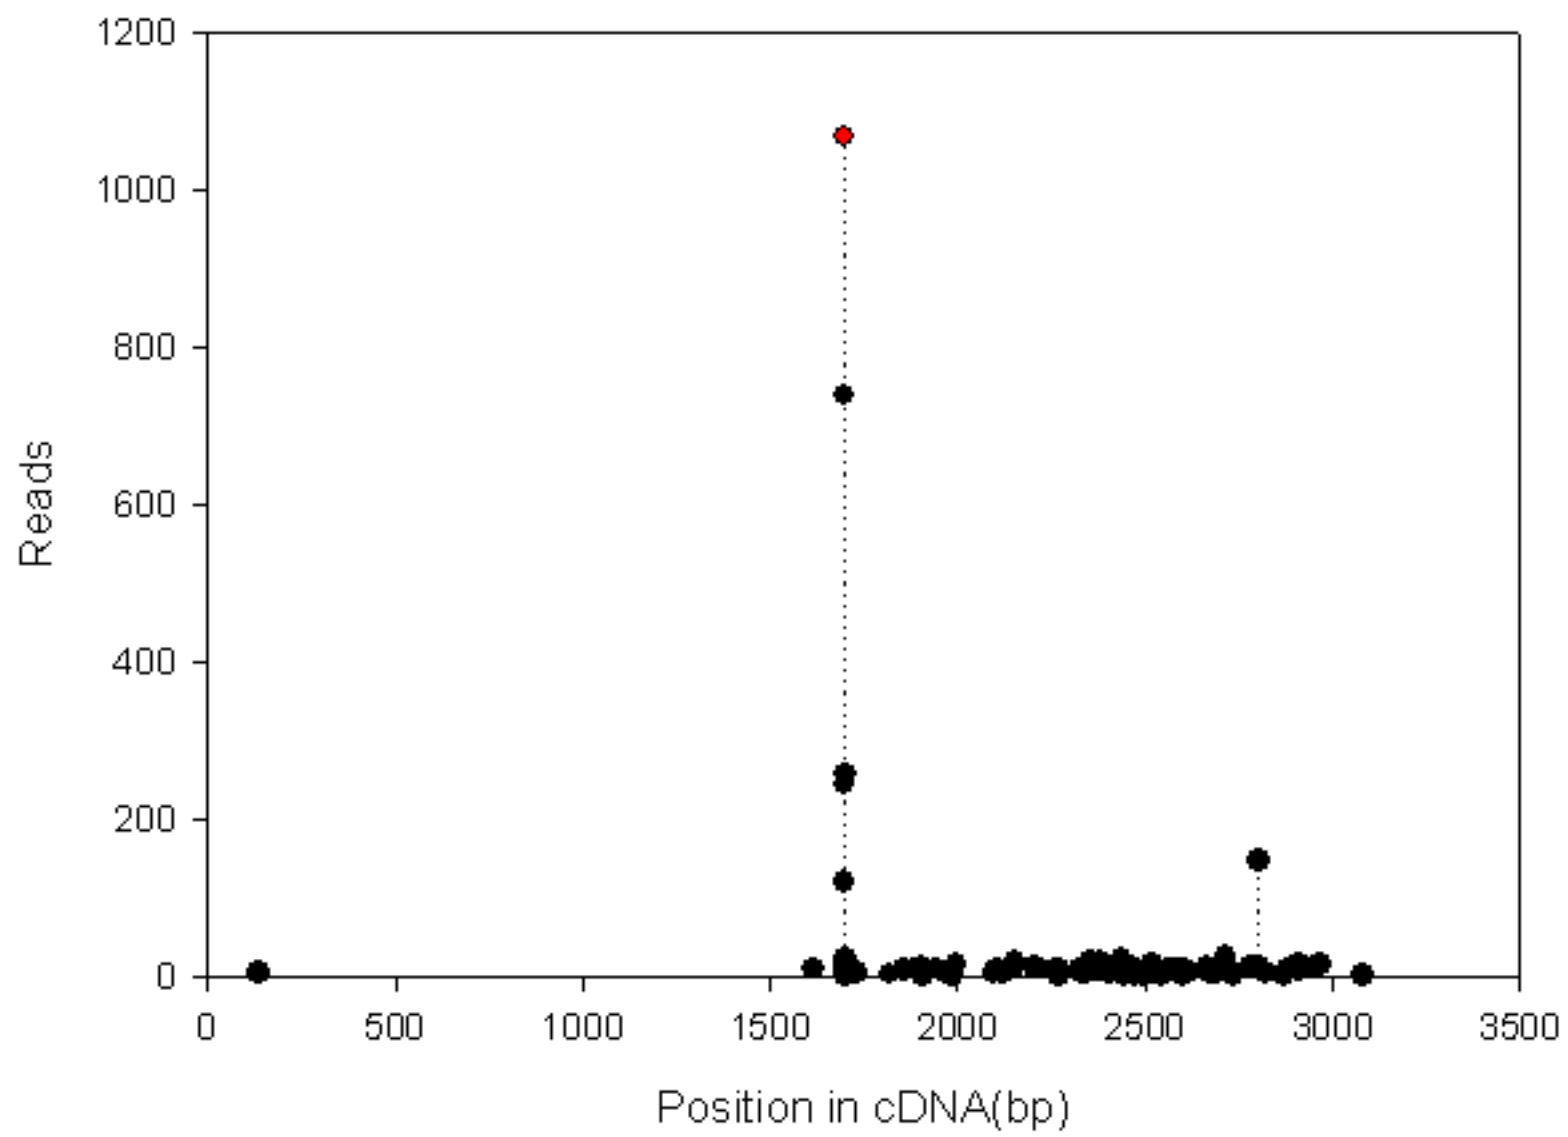

5' AAGGGAUUAUUGGCGCGGCUCAAUCAC 3'

Cs5g08980.1

.....

3' -CCUCUAUAACUGCGCCGAGUU---- 5'

Csi-miR171d

Csi-miR171d, target=Orange1.1t00199.1 gene=Orange1.1t00199  
Category:1  
Score=2.5  
Cleavage Site=1612

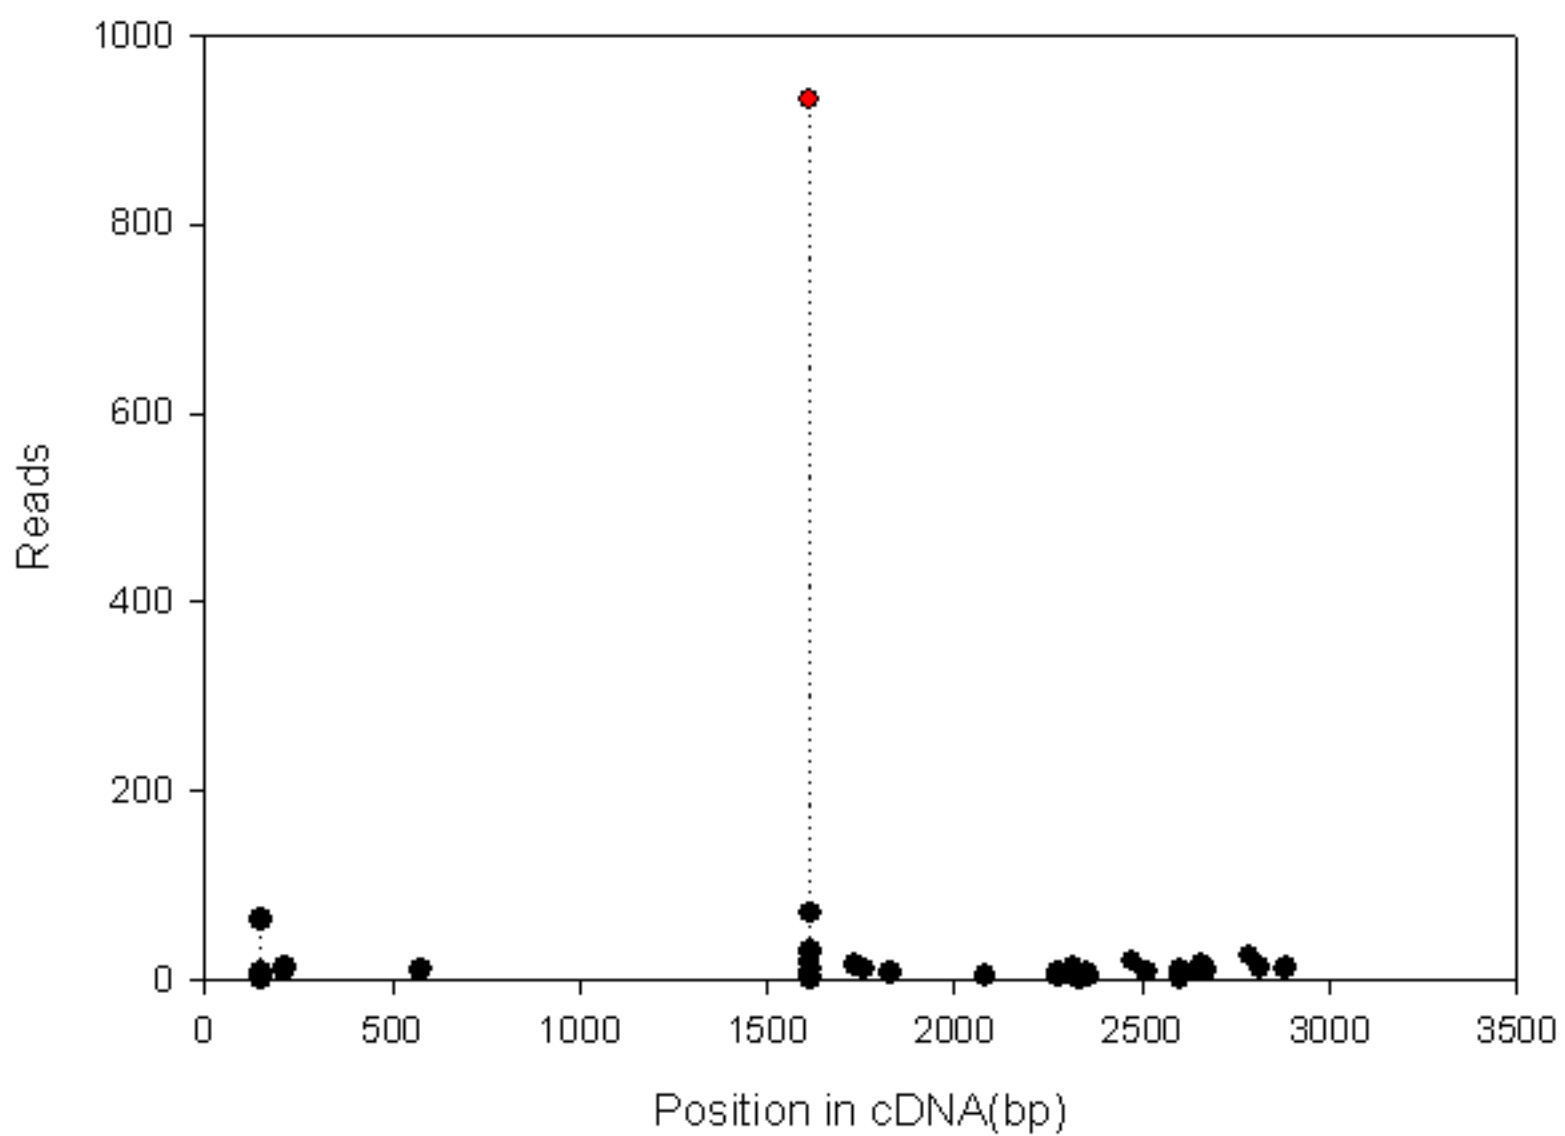

```
5' AAGGGAUUAUUGGCGCGGCUCAAUCAC 3' Orange1.1t00199.1
  ::::::::::::::::::::::::::::
3' -CCUCUAUAACUGCGCCGAGUU----- 5' Csi-miR171d
```



Csi-miR171d, target=Orange1.1t00200.1 gene=Orange1.1t00200  
 Category:1  
 Score=2.5  
 Cleavage Site=1511

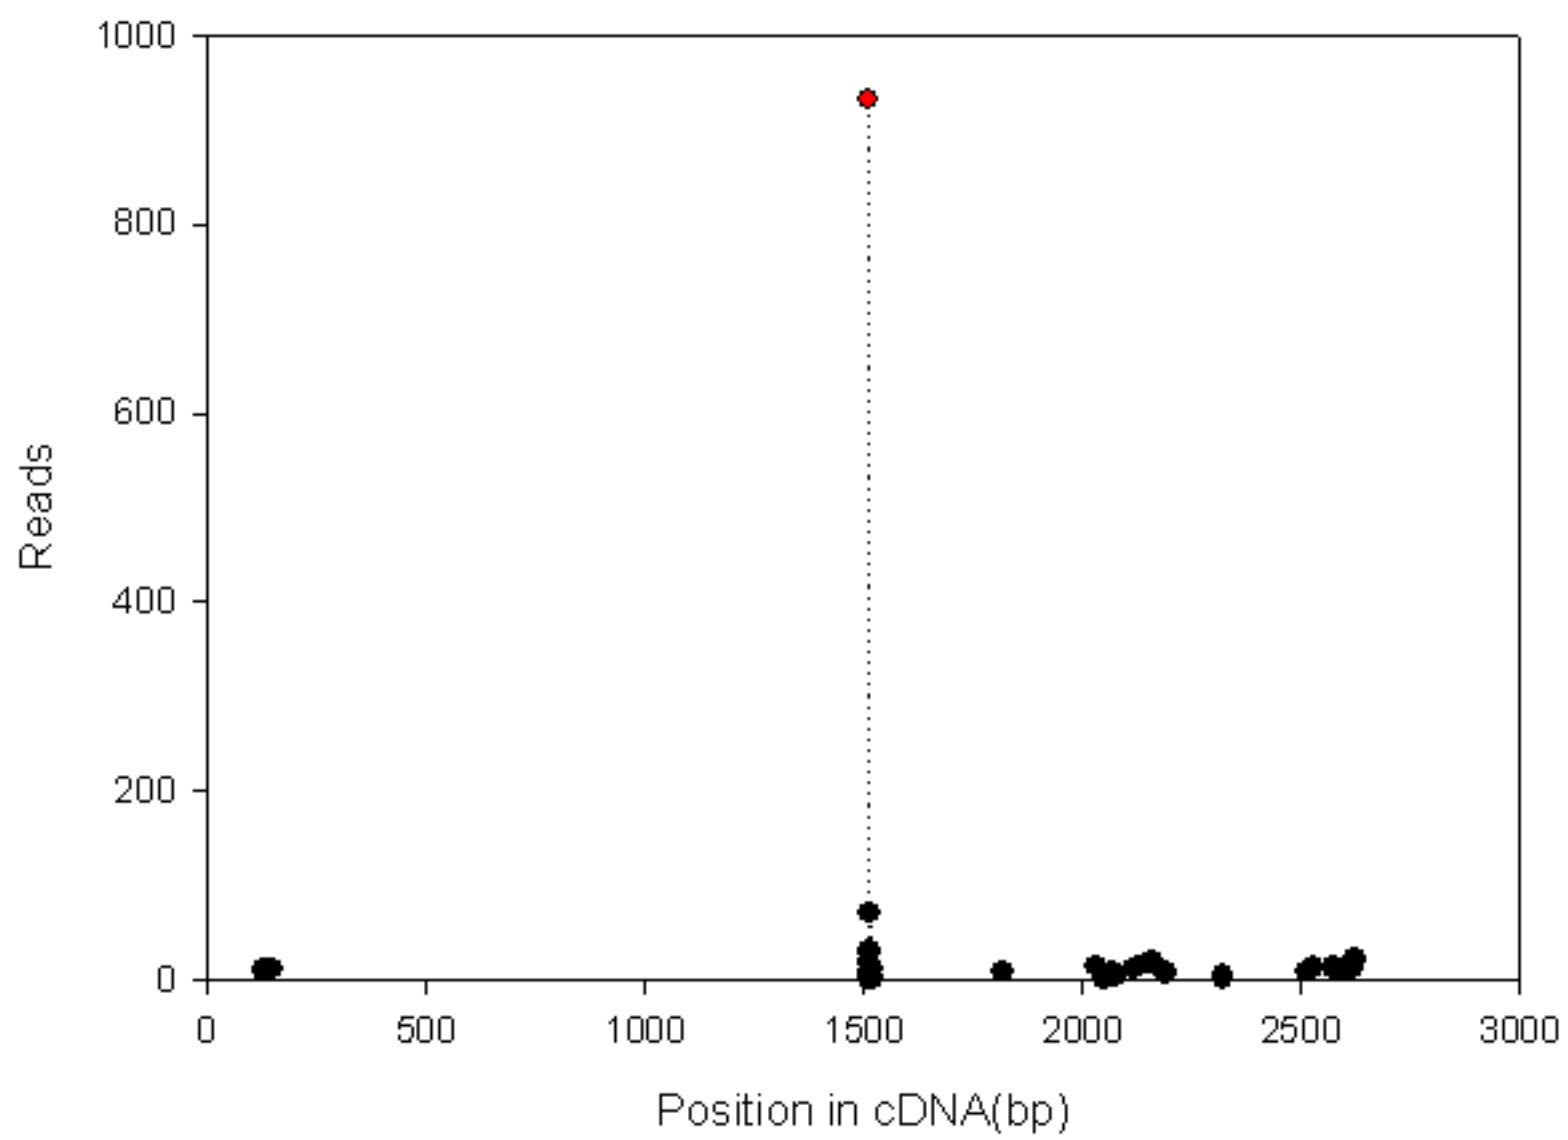

|    |                                 |    |                   |
|----|---------------------------------|----|-------------------|
| 5' | AAGGGAUAUUGGCGCGGCUCAUCAC       | 3' | Orange1.1t00200.1 |
|    | :.:.:.:.:.:.:.:.:.:.:.:.:.:.:.: |    |                   |
| 3' | -CCUCUAUAACUGCGCCGAGUU----      | 5' | Csi-miR171d       |

Csi-miR171g.1, target=Cs5g08980.1 gene=Cs5g08980  
 Category:1  
 Score=1  
 Cleavage Site=1697

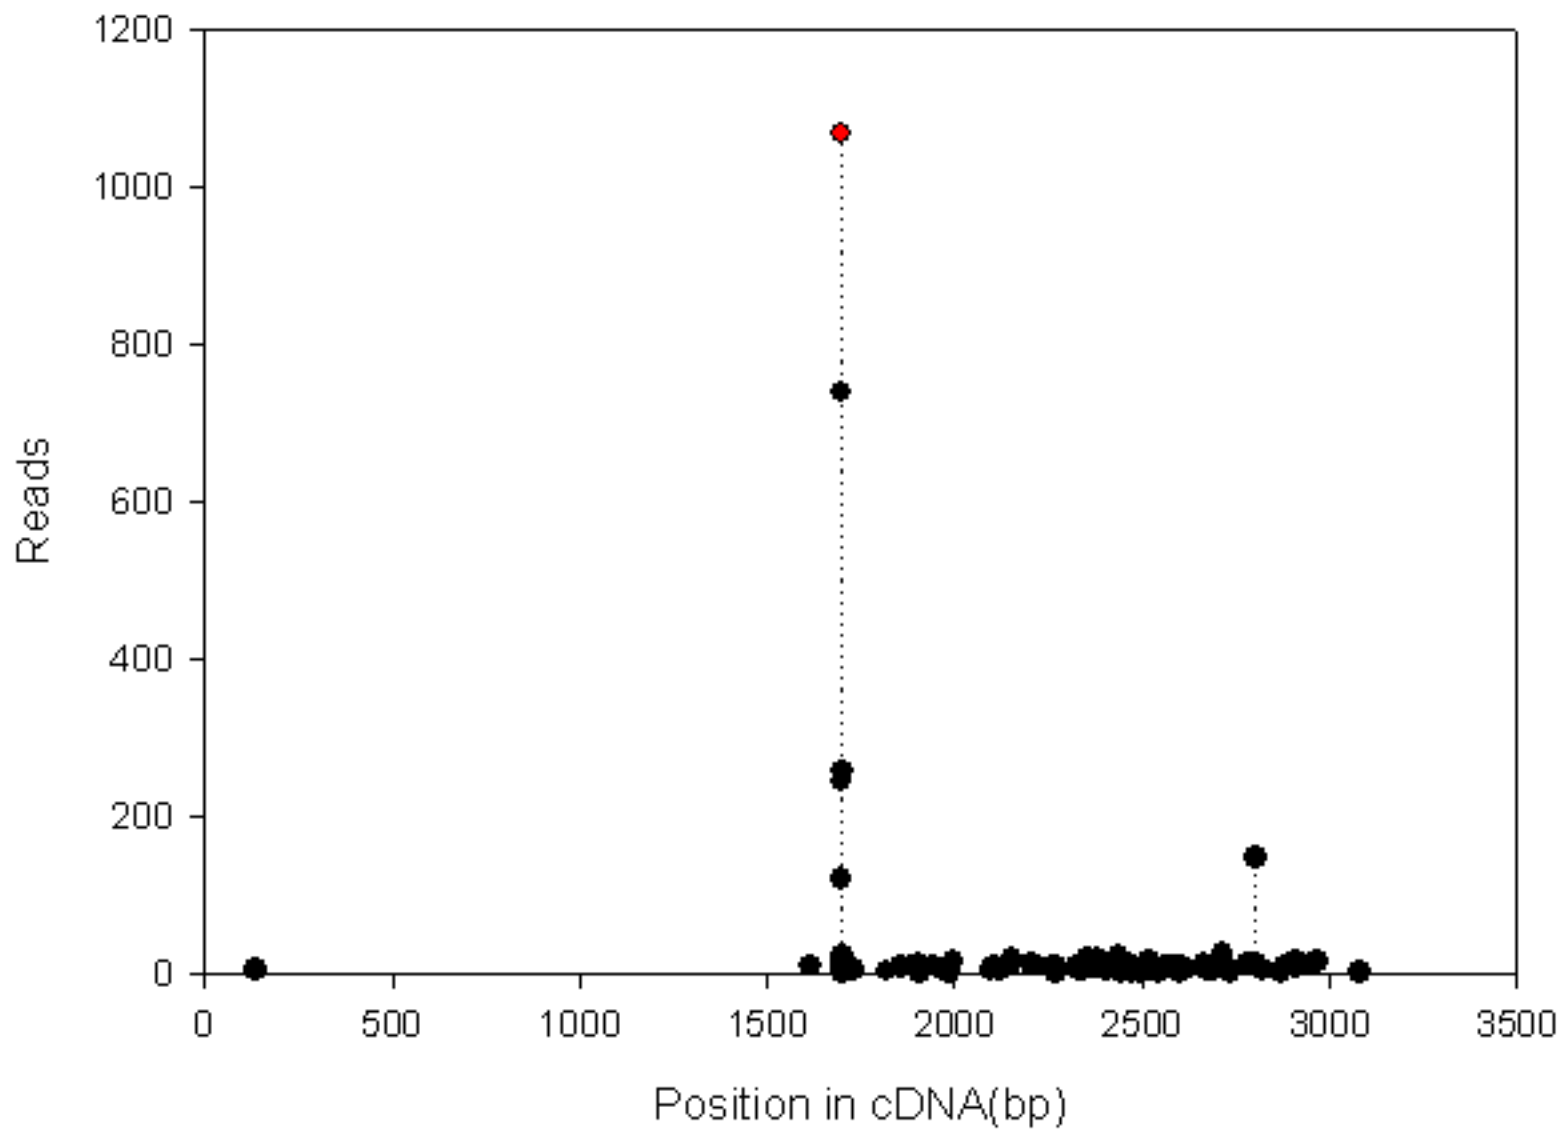

```

5' AAGGGAUUAUUGGCGCGGCUCAAUCAC 3'      Cs5g08980.1
   ::::::::::::::::::::::::::::
3' ----CUAUAACCGUGCCGAGUUAGU- 5'      Csi-miR171g.1
  
```

Csi-miR171g.1, target=Orange1.1t00199.1 gene=Orange1.1t00199  
 Category:1  
 Score=1  
 Cleavage Site=1612

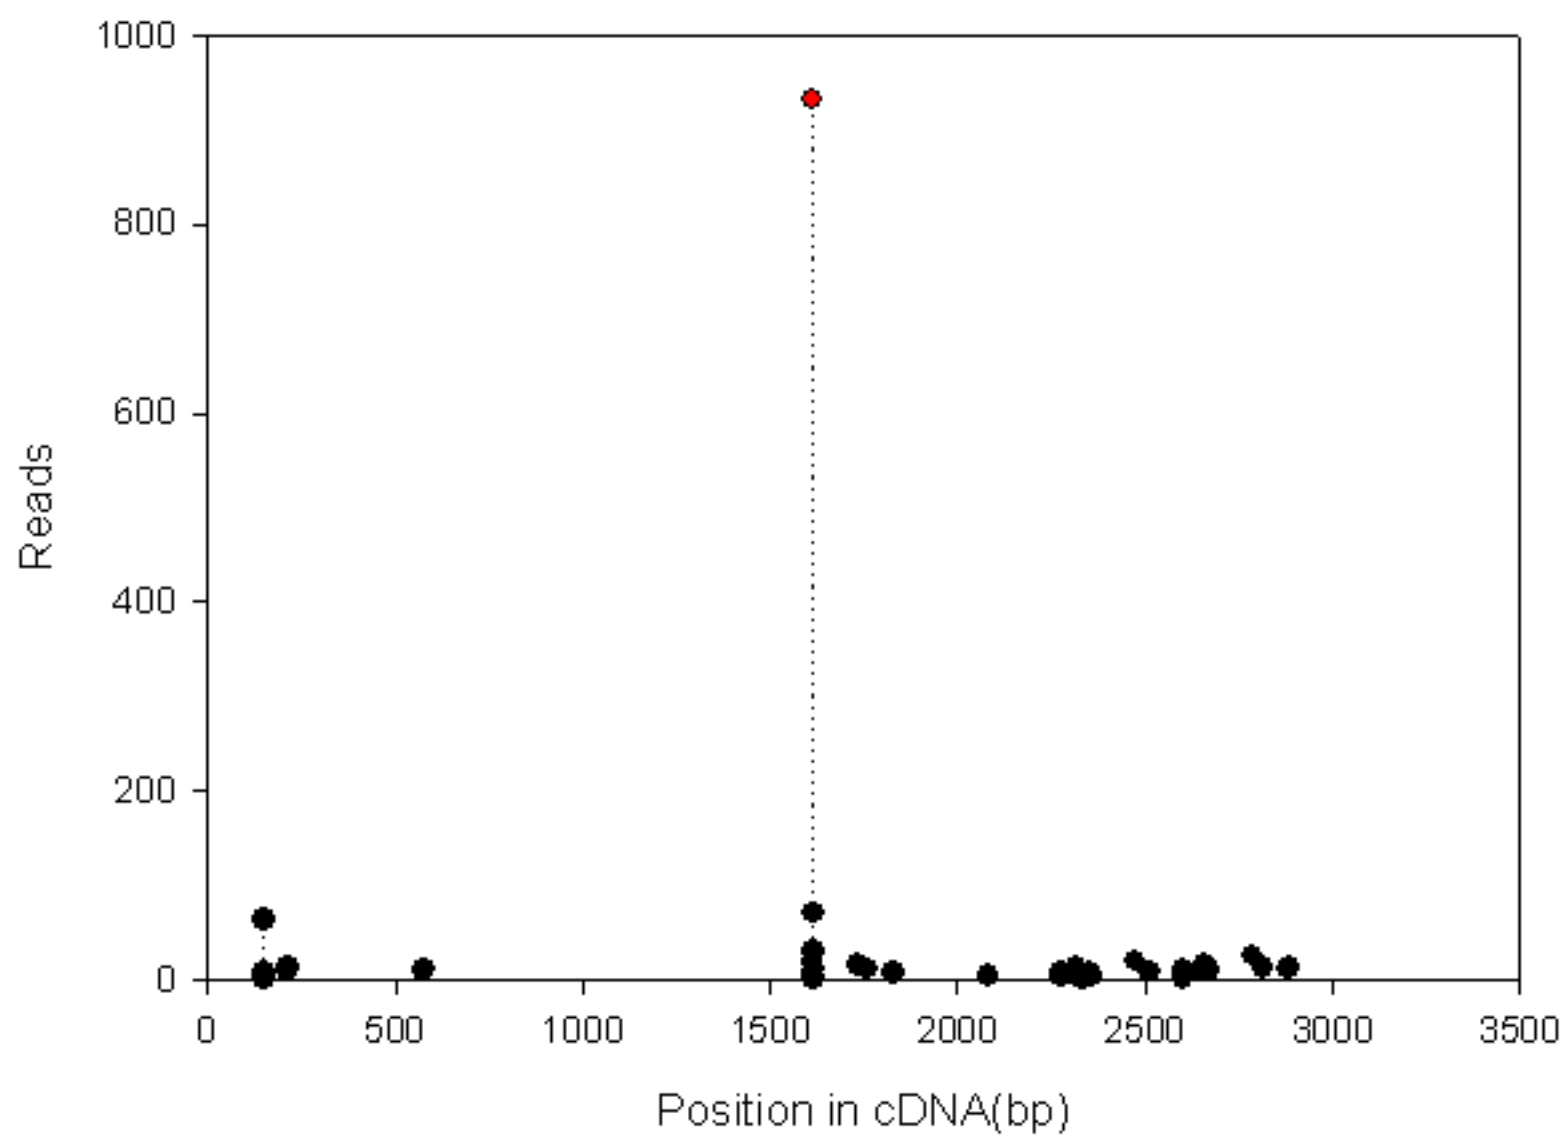

```

5' AAGGGAUAUUGGCGCGGCUCAUCAC 3'      Orange1.1t00199.1
   ::::::::::::::::::::::::::::
3' ----CUAUAACCGUGCCGAGUUAGU- 5'      Csi-miR171g.1
  
```

Csi-miR171g.1, target=Orange1.1t00200.1 gene=Orange1.1t00200  
 Category:1  
 Score=1  
 Cleavage Site=1511

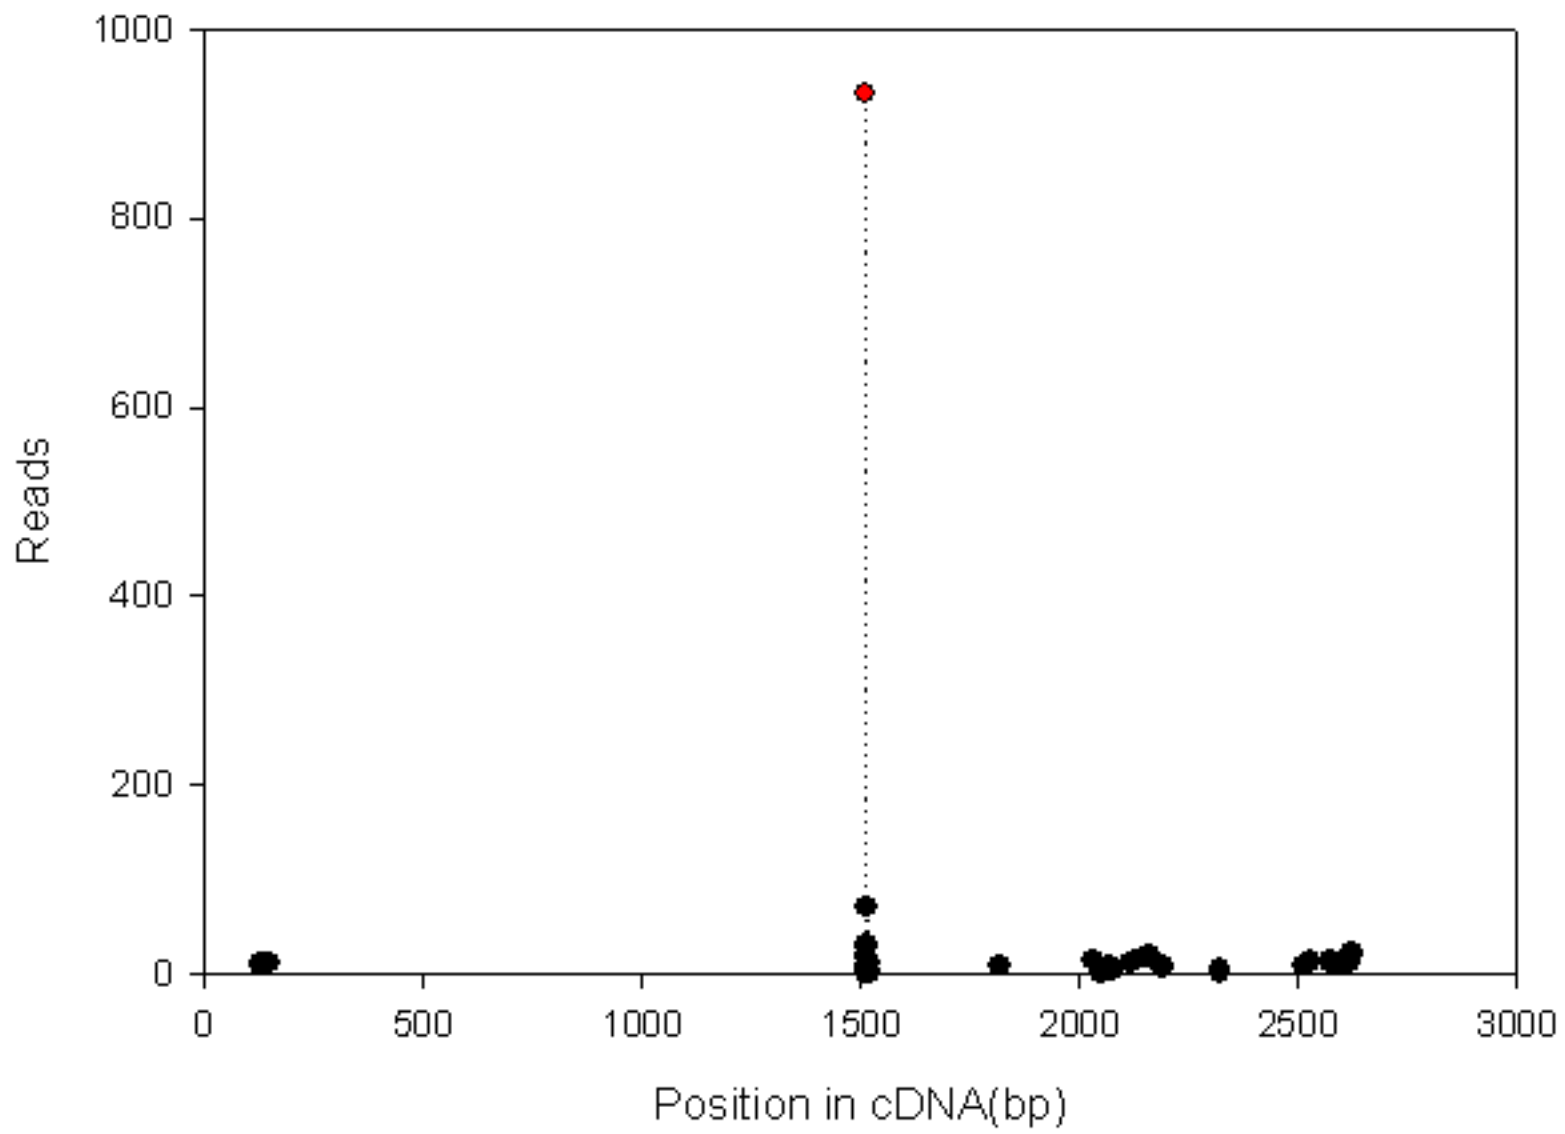

5' AAGGGAUAUUGGCGCGGCUCAUCAC 3'  
 :::::::::::::::::::::::  
 3' ----CUAUAACCGUGCCGAGUUAGU- 5'

Orange1.1t00200.1  
 Csi-miR171g.1

Csi-miR172a-3p.1, target=Cs6g11940.1 gene=Cs6g11940  
 Category:3  
 Score=5  
 Cleavage Site=2040

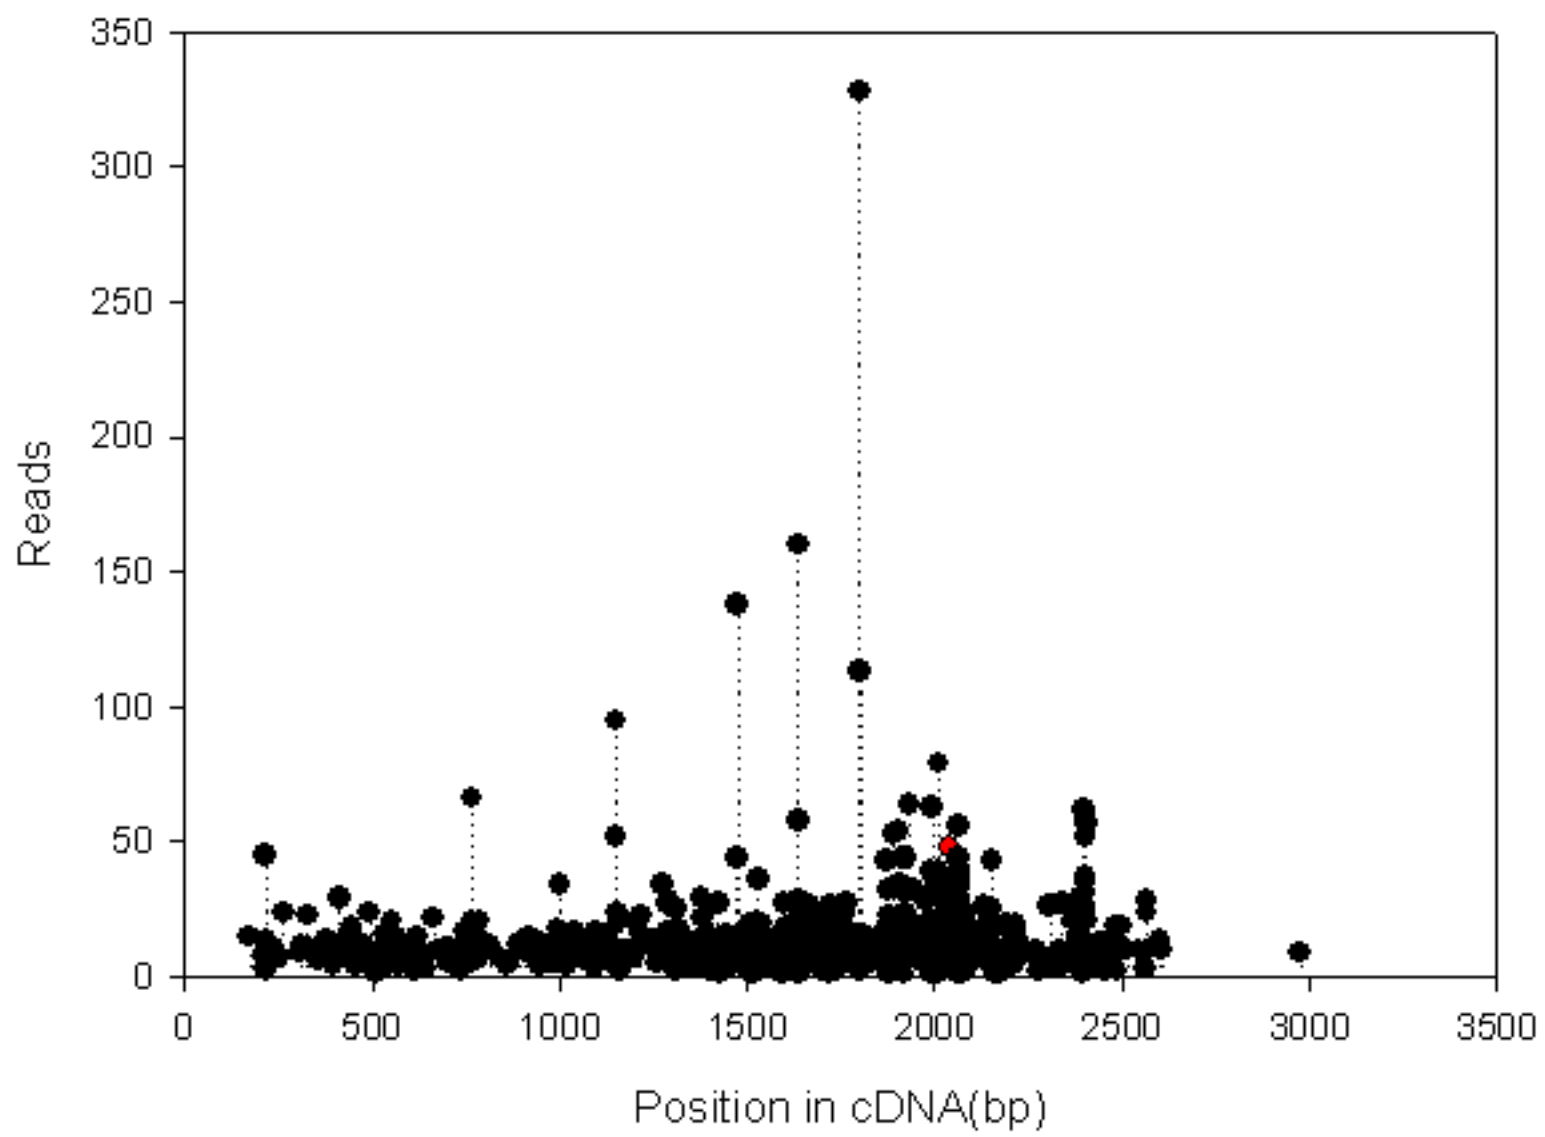

```

5' AGAGCUUCAUCCAUCAAGAUUCUGUG 3'      Cs6g11940.1
   ::  :::  ::::::::::::::::::::
3' --ACGUCGUA-GUAGUUCUAAGA--- 5'      Csi-miR172a-3p.1
  
```

Csi-miR172a-3p.1, target=Cs7g27790.1 gene=Cs7g27790

Category:1

Score=1

Cleavage Site=1614

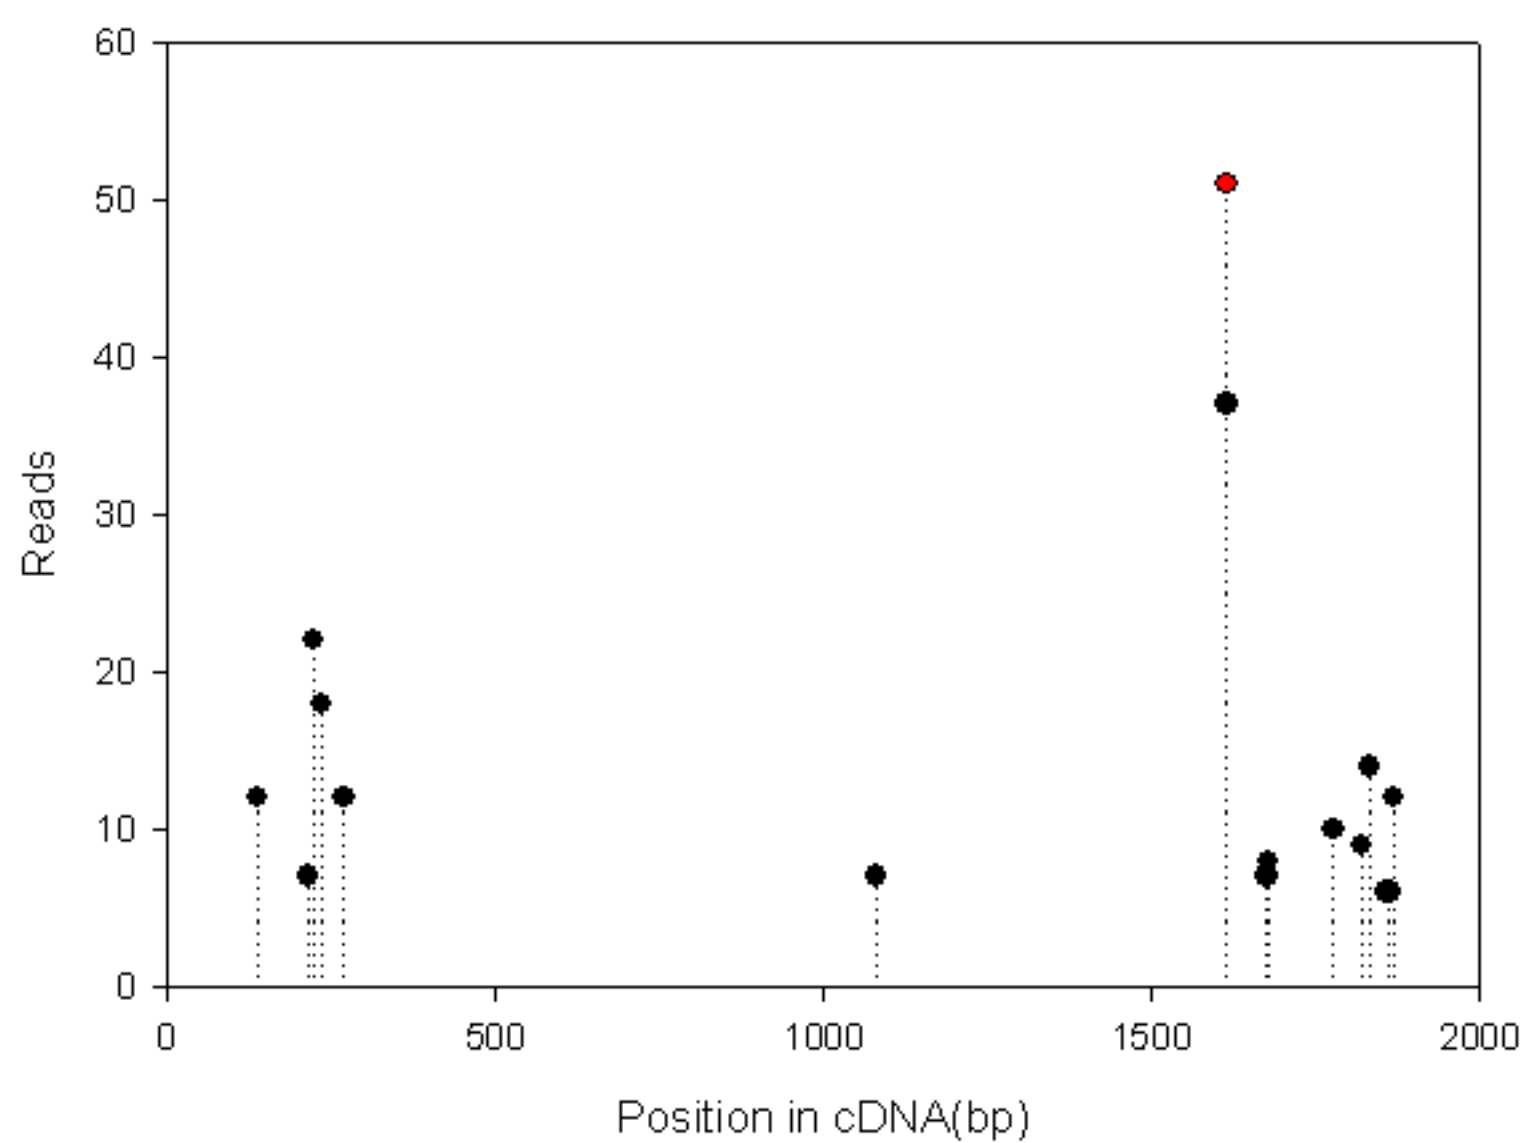

5' AGUGCAGCAUCAUCAGGAUUCUCUUC 3'

Cs7g27790.1

::::::::::::::::::

3' --ACGUCGUAGUAGUUCUAAGA---- 5'

Csi-miR172a-3p.1

Csi-miR172a-3p.1, target=Cs8g17390.1 gene=Cs8g17390  
 Category:1  
 Score=2  
 Cleavage Site=1865

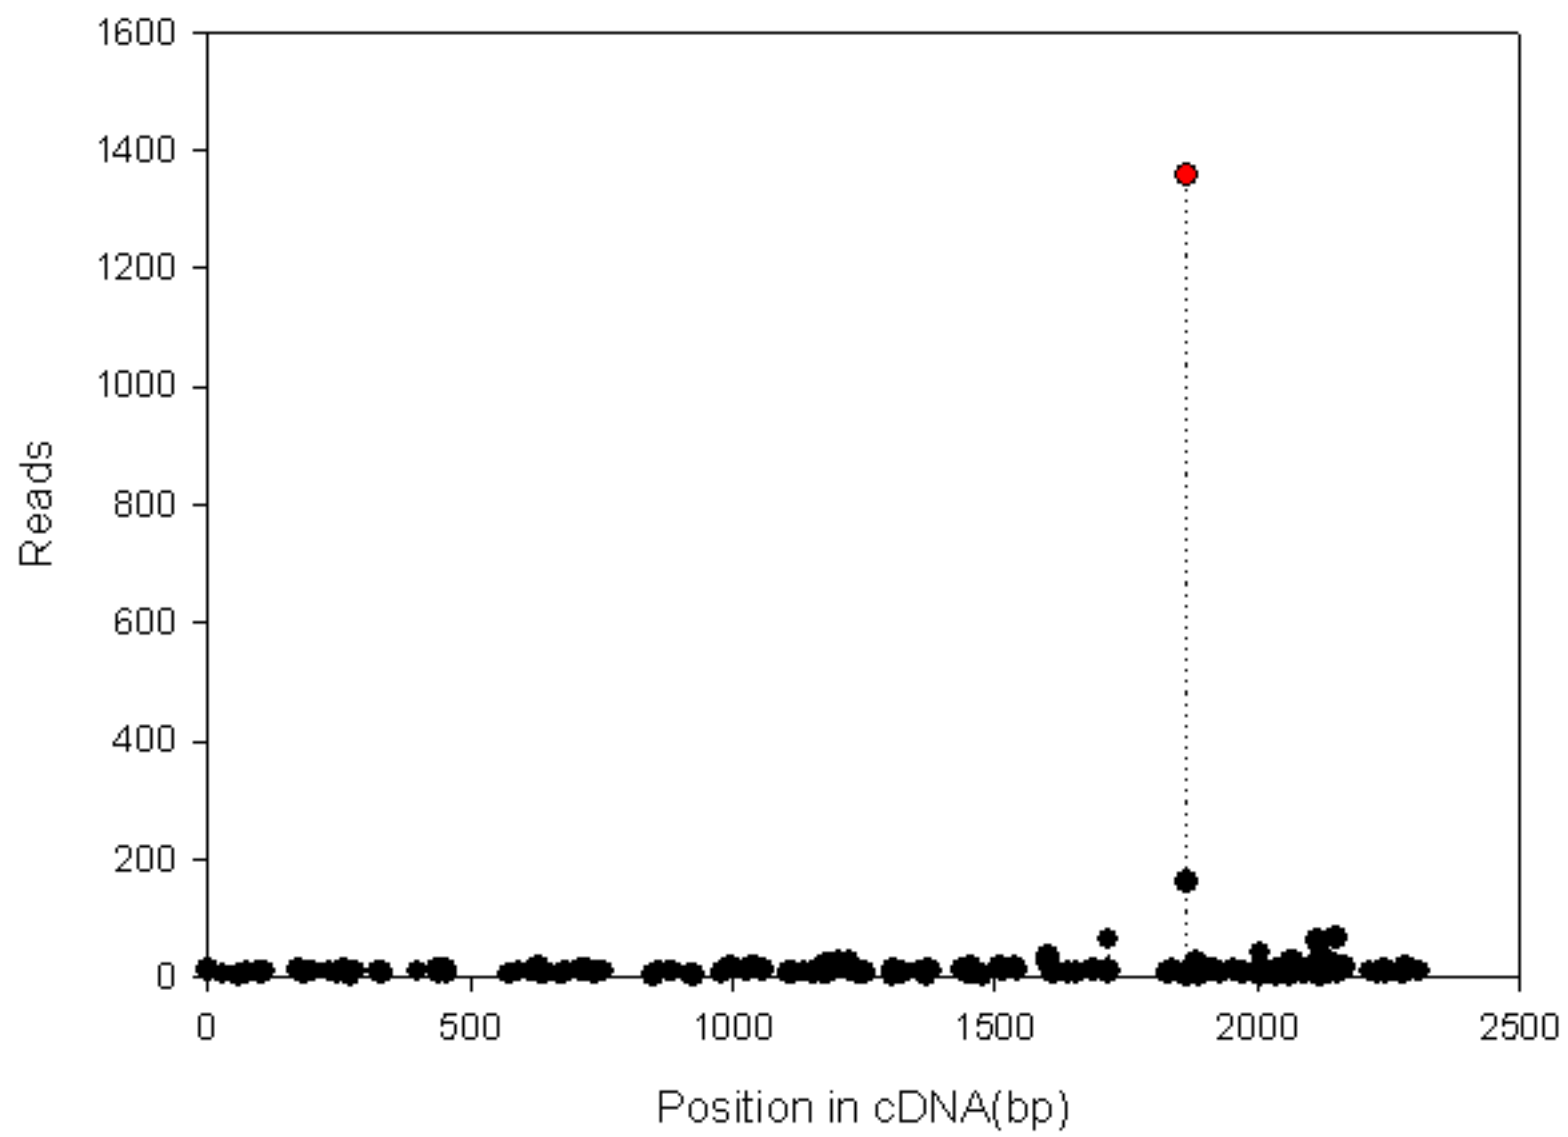

```

5' AGUGCAGCAUCAUCAGGAUCCCAUU 3'      Cs8g17390.1
   ::::::::::::::::::::
3' --ACGUCGUAGUAGUUCUAAGA---- 5'      Csi-miR172a-3p.1

```

Csi-miR172a-3p.1, target=Orange1.1t04055.1 gene=Orange1.1t04055

Category:1

Score=2

Cleavage Site=2049

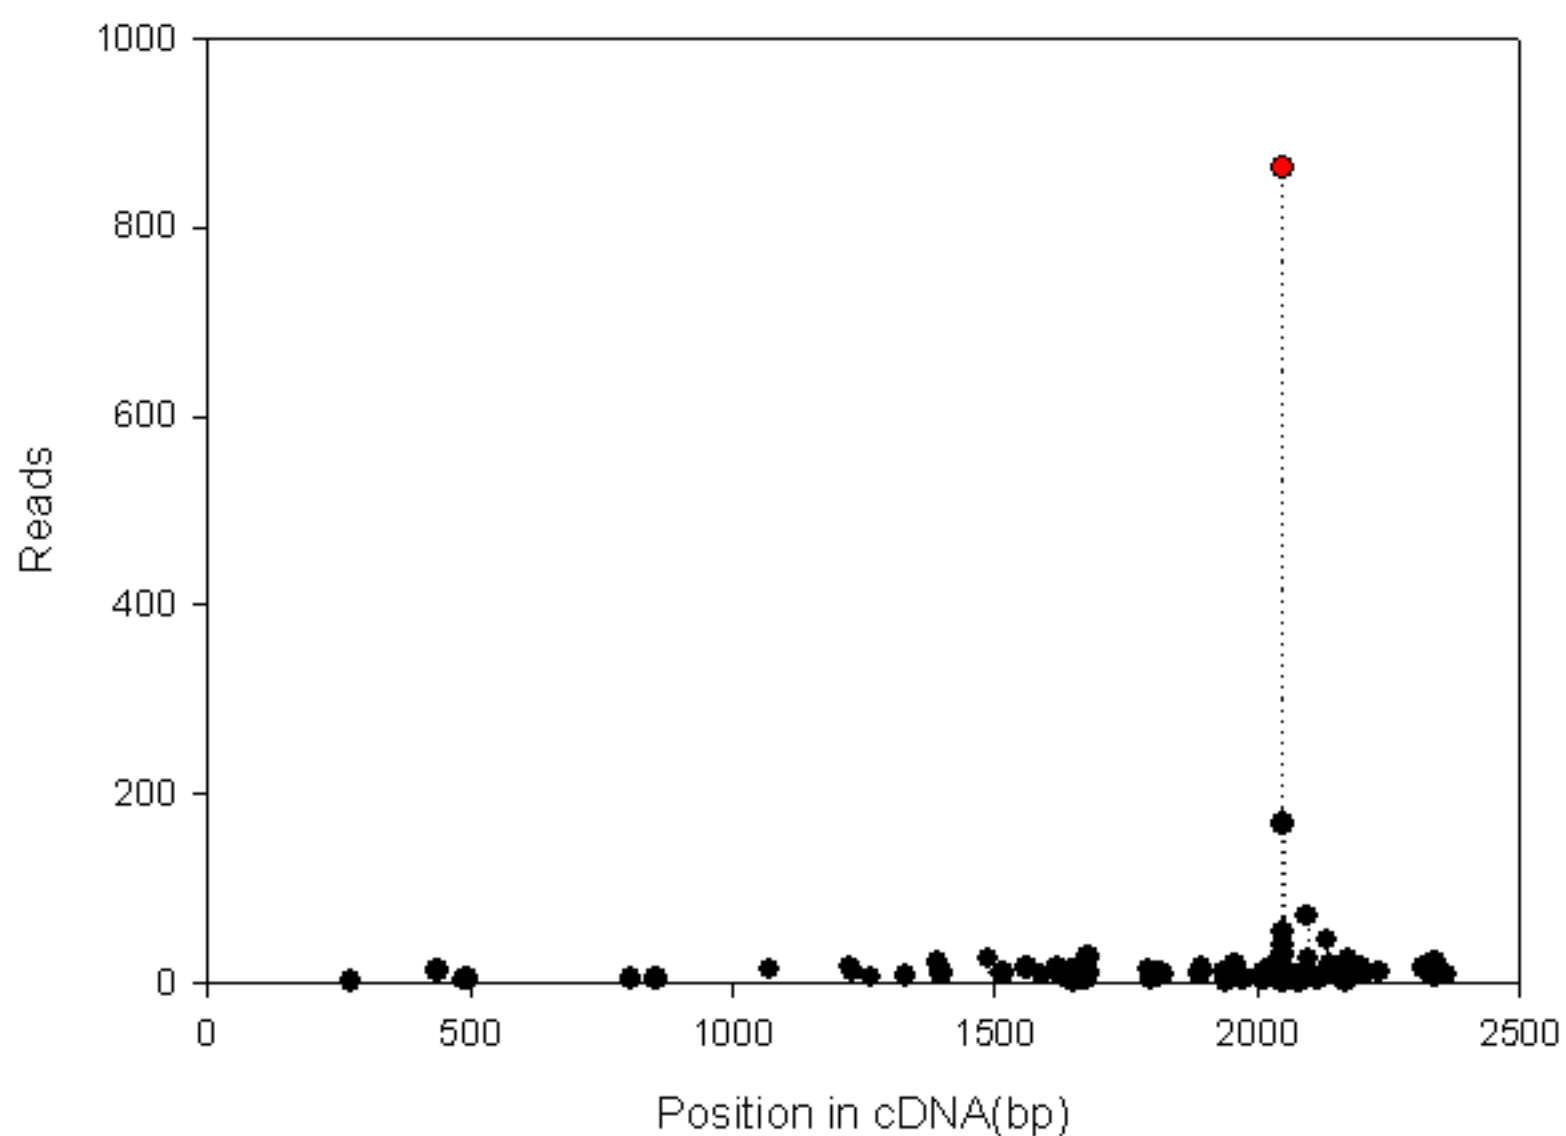

5' GCUGCAGCAUCAUCAGGAUUCUUCA 3'

.....

3' --ACGUCGUAGUAGUUCUAAGA---- 5'

Orange1.1t04055.1

Csi-miR172a-3p.1



Csi-miR172a-3p.2, target=Cs7g27790.1 gene=Cs7g27790

Category:1

Score=2

Cleavage Site=1614



5' AGUGCAGCAUCAUCAGGAUUCUCUUC 3'

Cs7g27790.1

.....

3' -AACGUCGUAGUAGUUCUAAGA----- 5'

Csi-miR172a-3p.2

Csi-miR172a-3p.2, target=Cs8g17390.1 gene=Cs8g17390

Category:1

Score=3

Cleavage Site=1865

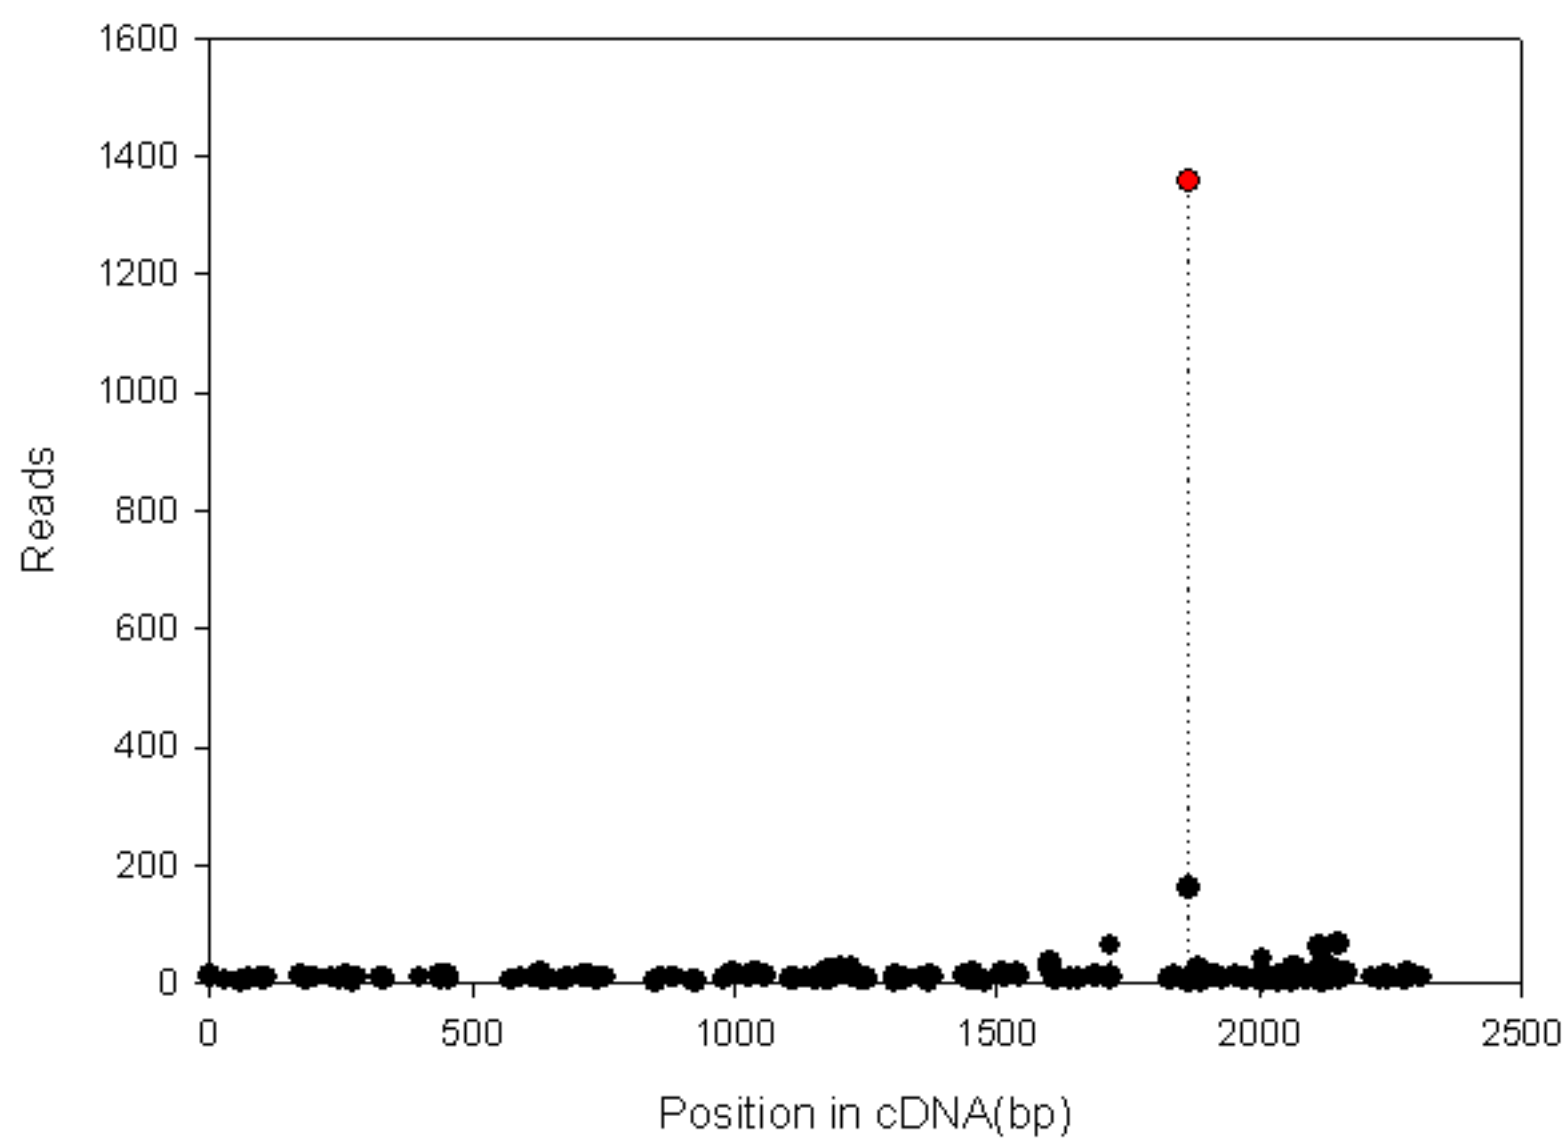

5' AGUGCAGCAUCAUCAGGAUCCCAUU 3'

Cs8g17390.1

.....

3' -AACGUCGUAGUAGUUCUAAGA---- 5'

Csi-miR172a-3p.2

Csi-miR172a-3p.2, target=Orange1.1t04055.1 gene=Orange1.1t04055  
 Category:1  
 Score=3  
 Cleavage Site=2049

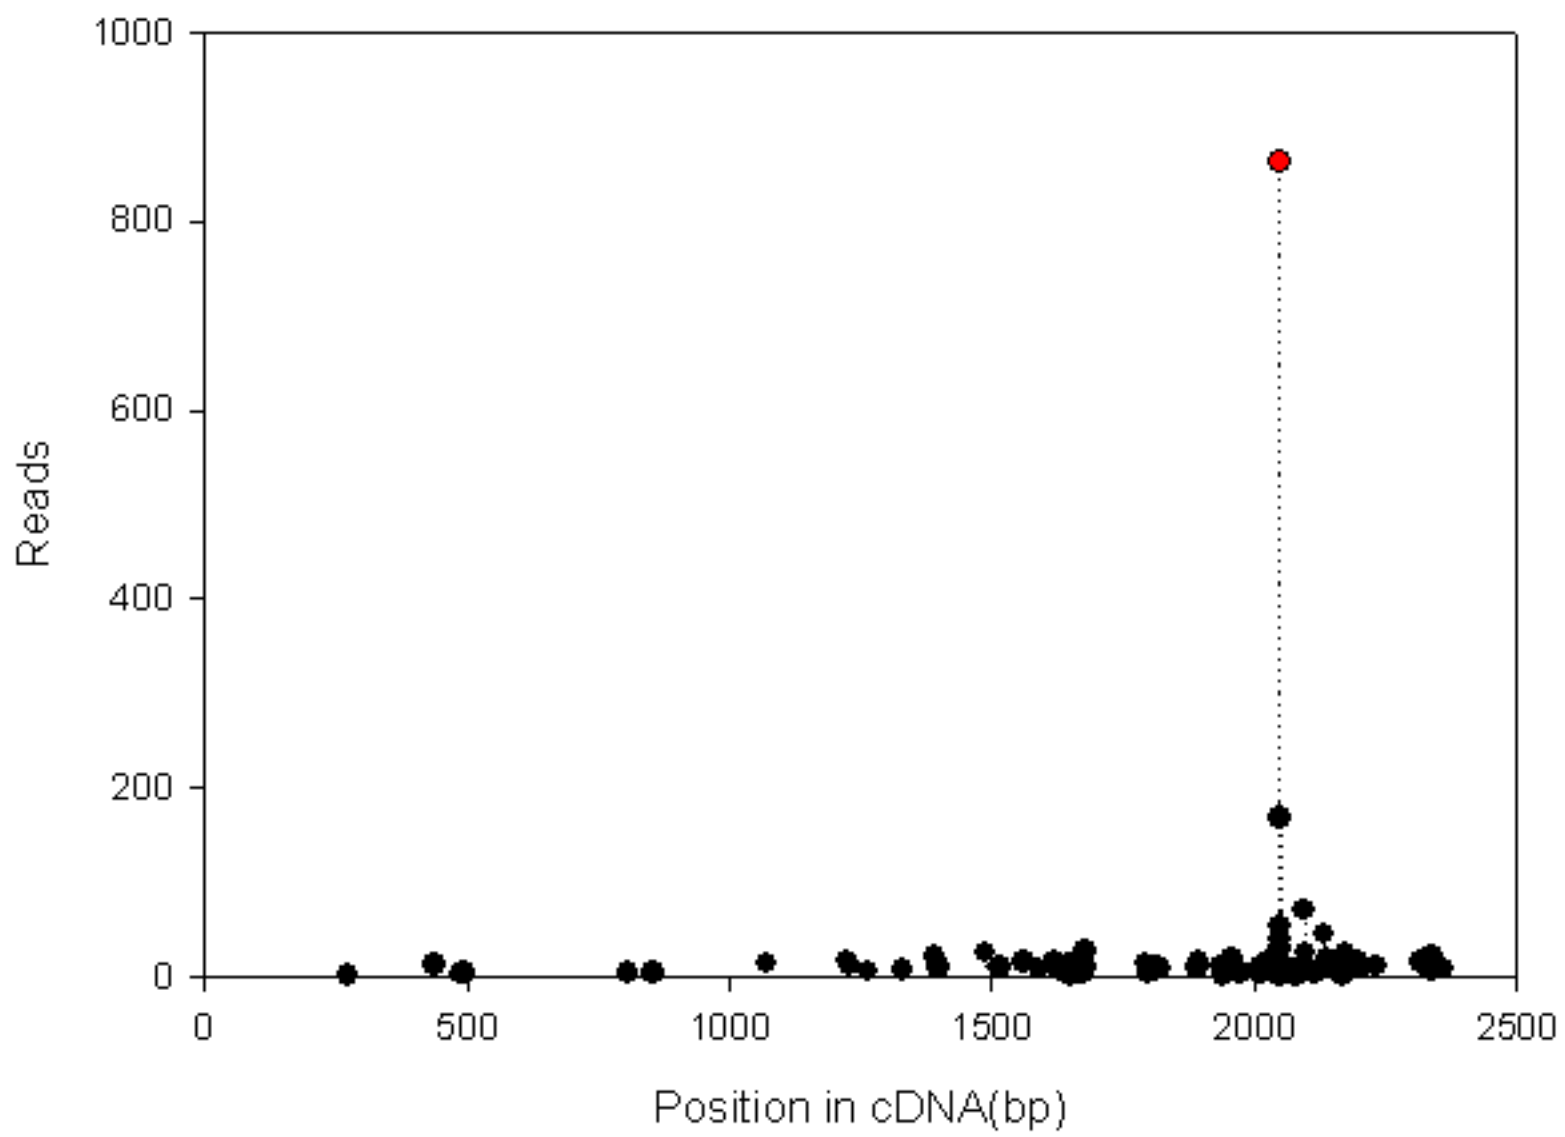

5' GCUGCAGCAUCAUCAGGAUUCCCUCA 3'  
 :::::::::::::::::::::  
 3' -AACGUCGUAGUAGUUCUAAGA---- 5'

Orange1.1t04055.1  
 Csi-miR172a-3p.2

Csi-miR172a-3p.3, target=Cs2g21180.1 gene=Cs2g21180

Category:3

Score=5

Cleavage Site=437

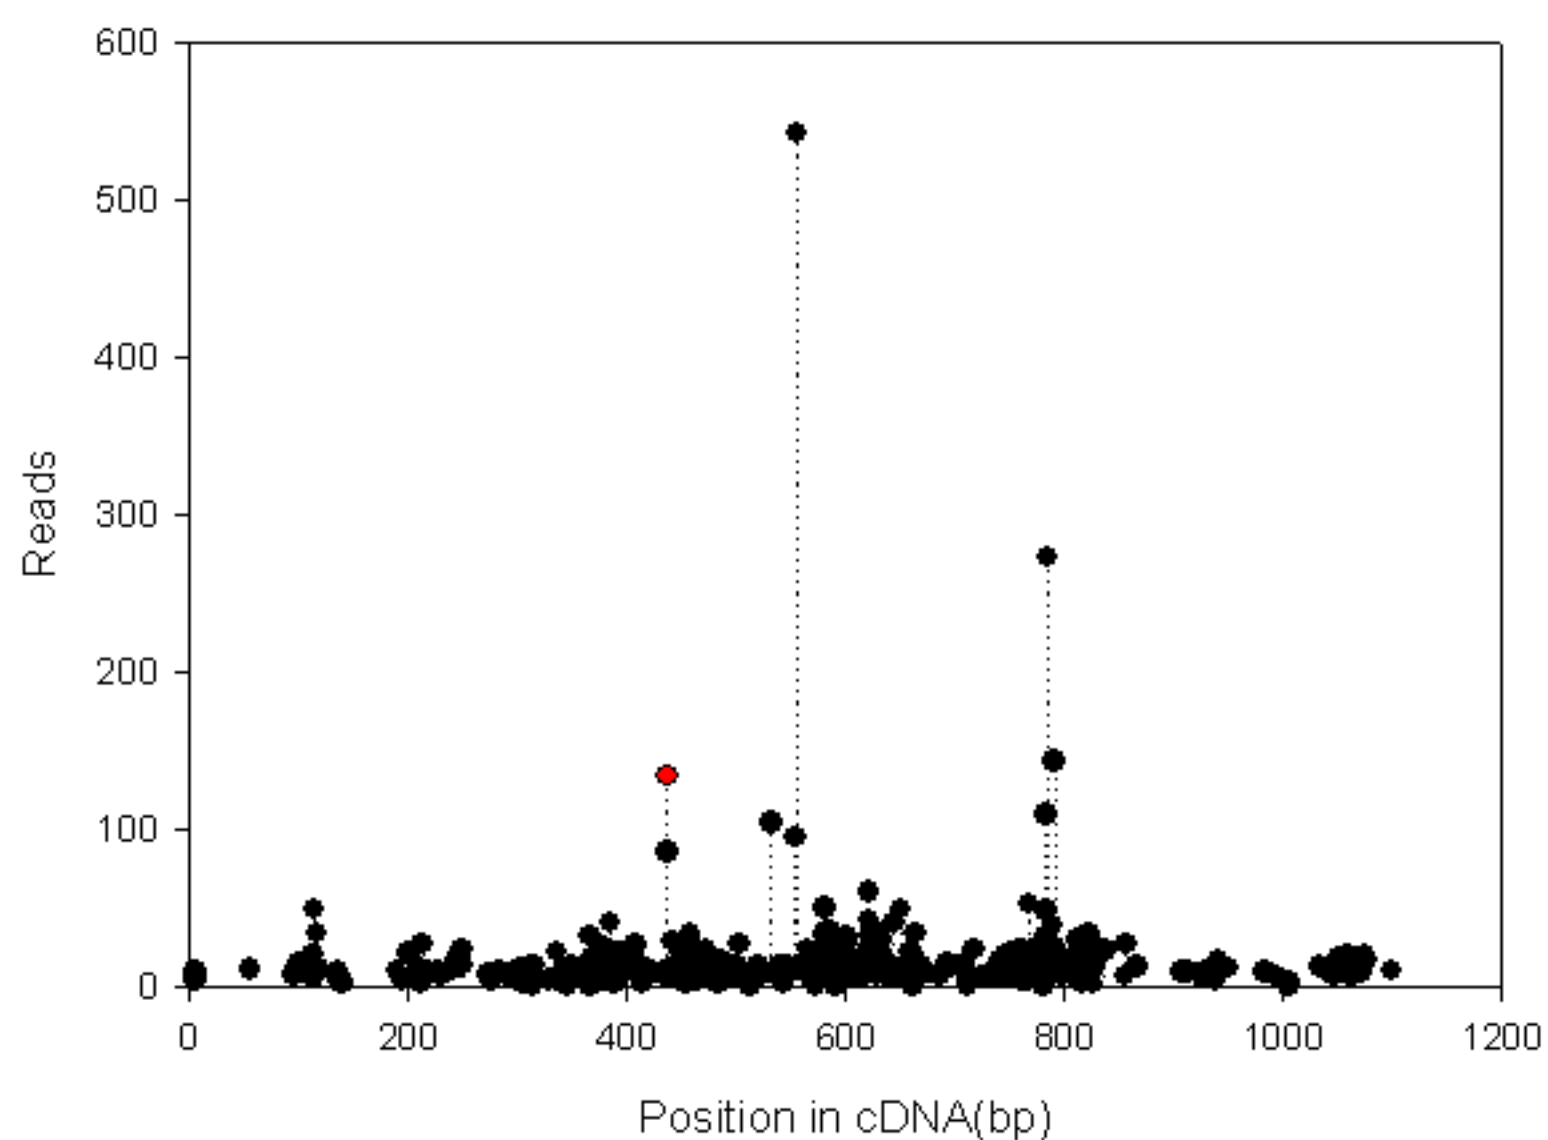

5' UUUACAGCAUCCUCAAGA UCCAGCAA 3'

Cs2g21180.1

:: ::::: ::::: :

3' -AACGUCGUAGUAGUUCUAAG----- 5'

Csi-miR172a-3p.3

Csi-miR172a-3p.3, target=Cs7g27790.1 gene=Cs7g27790  
 Category:1  
 Score=2  
 Cleavage Site=1614

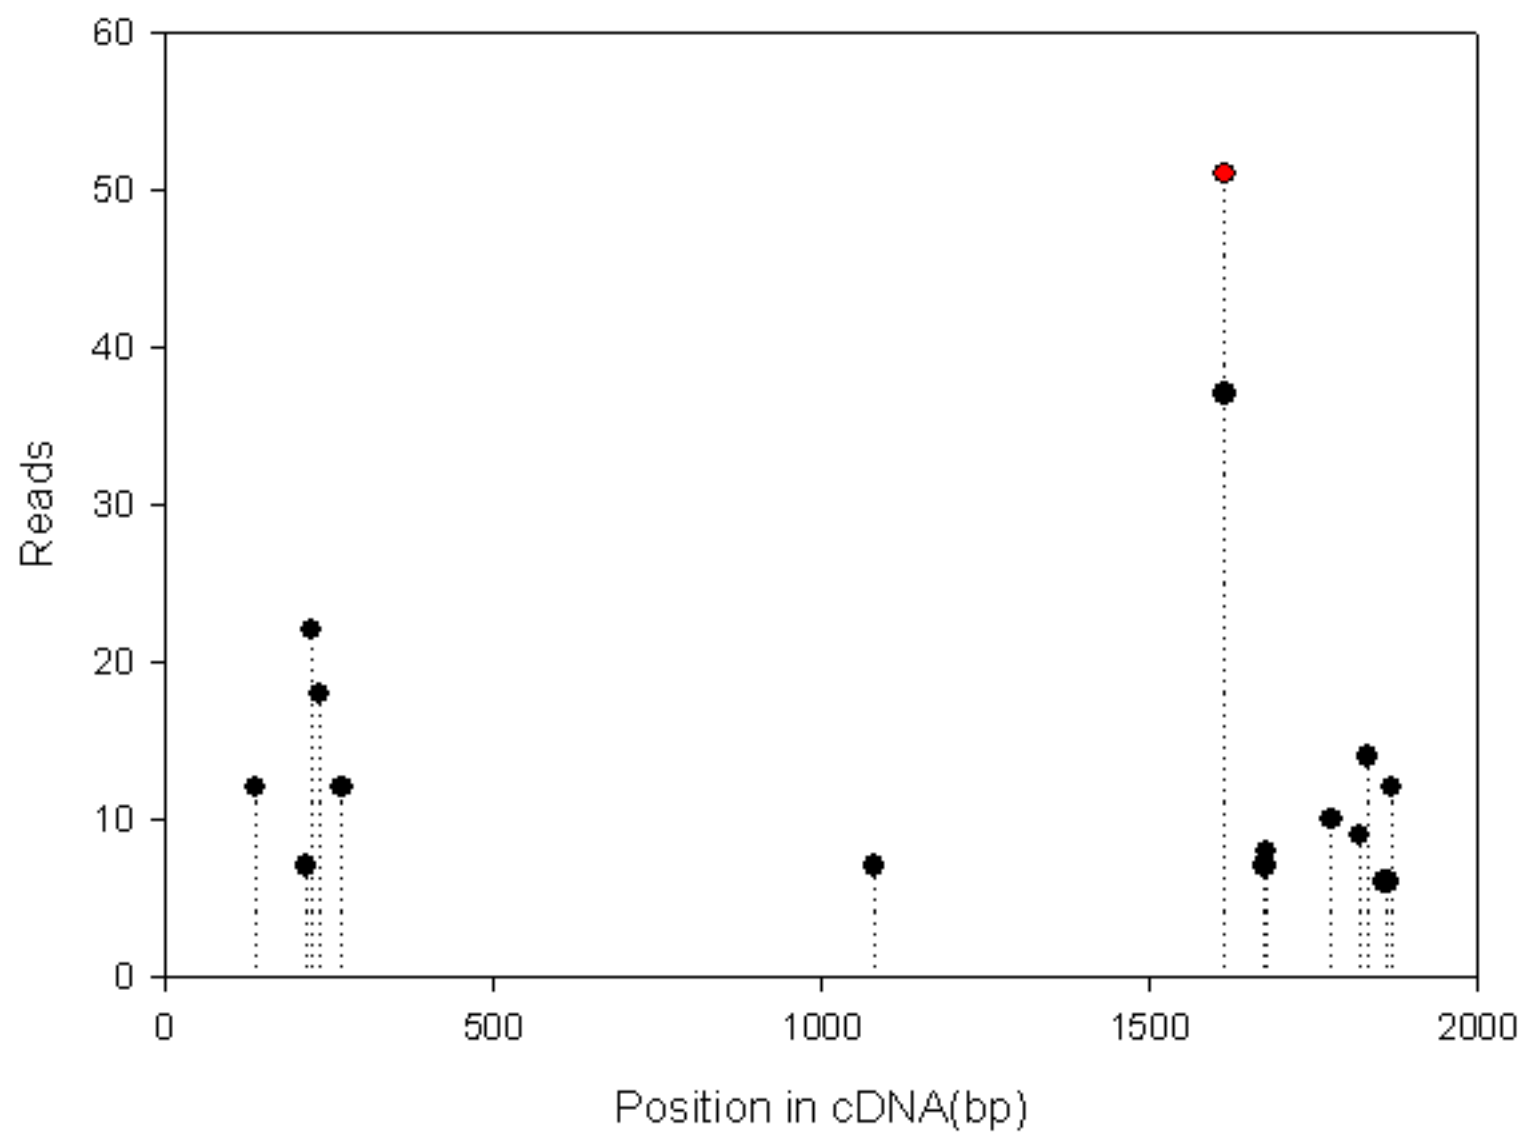

5' AGUGCAGCAUCAUCAGGAUUCUCUUC 3'  
 :::::::::::::::::::::  
 3' -AACGUCGUAGUAGUUCUAAG----- 5'

Cs7g27790.1

Csi-miR172a-3p.3

Csi-miR172a-3p.3, target=Cs8g17390.1 gene=Cs8g17390

Category:1

Score=2

Cleavage Site=1865



5' AGUGCAGCAUCAUCAGGAUCCCAUU 3'

Cs8g17390.1

.....

3' -AACGUCGUAGUAGUUCUAAG----- 5'

Csi-miR172a-3p.3

Csi-miR172a-3p.3, target=Orange1.1t04055.1 gene=Orange1.1t04055  
 Category:1  
 Score=2  
 Cleavage Site=2049



5' GCUGCAGCAUCAUCAGGAUCCCUCA 3'  
 :::::::::::::::::::::  
 3' -AACGUCGUAGUAGUUCUAAG----- 5'

Orange1.1t04055.1  
 Csi-miR172a-3p.3

Csi-miR172c.1, target=Cs2g21180.1 gene=Cs2g21180  
 Category:3  
 Score=4  
 Cleavage Site=437

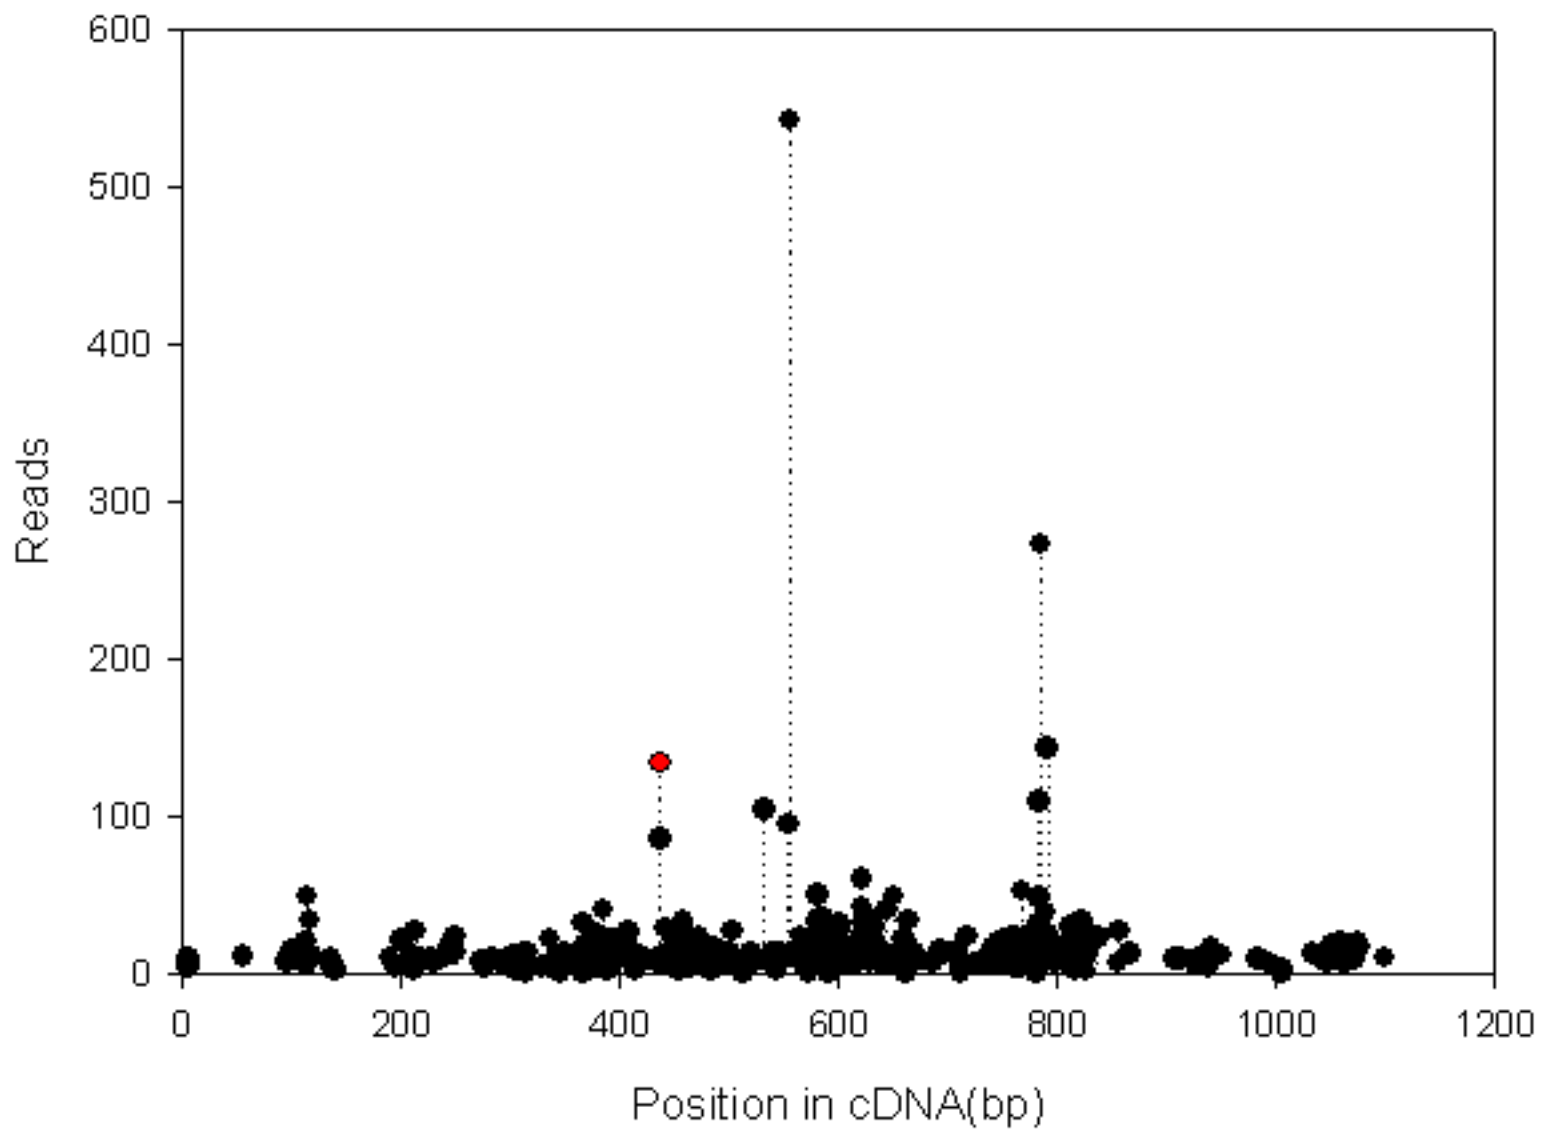

```

5' UUUACAGCAUCCUCAAGA-UCCAGCAA 3'      Cs2g21180.1
   : : : : : : : : : : : : : : : :
3' -----UCGUAGUAGUUCUAAGGU----- 5'  Csi-miR172c.1

```



Csi-miR172c.1, target=Cs3g06140.1 gene=Cs3g06140  
 Category:1  
 Score=4.5  
 Cleavage Site=480

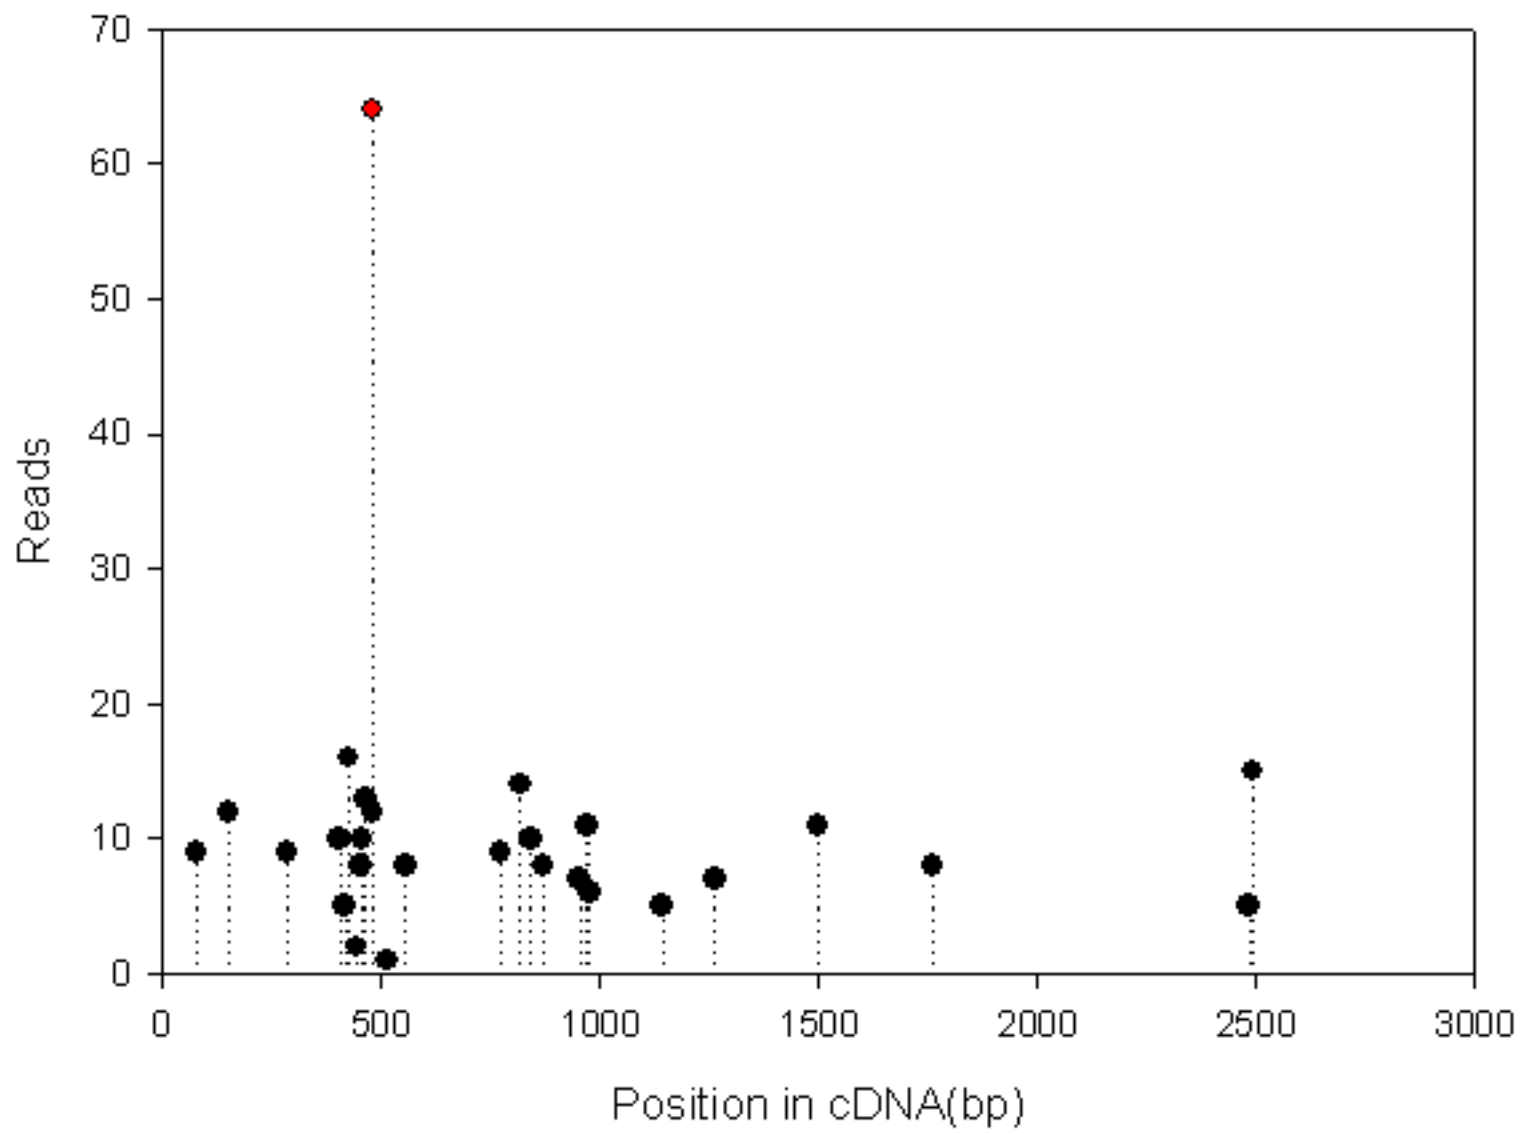

```

5'  UGAGUCUGCCACCAUUAAGAUUCCUG 3'      Cs3g06140.1
      .  ::  :::::
3'  -----UCGUAGUAGUUCUAAGGU- 5'      Csi-miR172c.1

```

Csi-miR172c.1, target=Cs6g11940.1 gene=Cs6g11940  
 Category:3  
 Score=4.5  
 Cleavage Site=2040

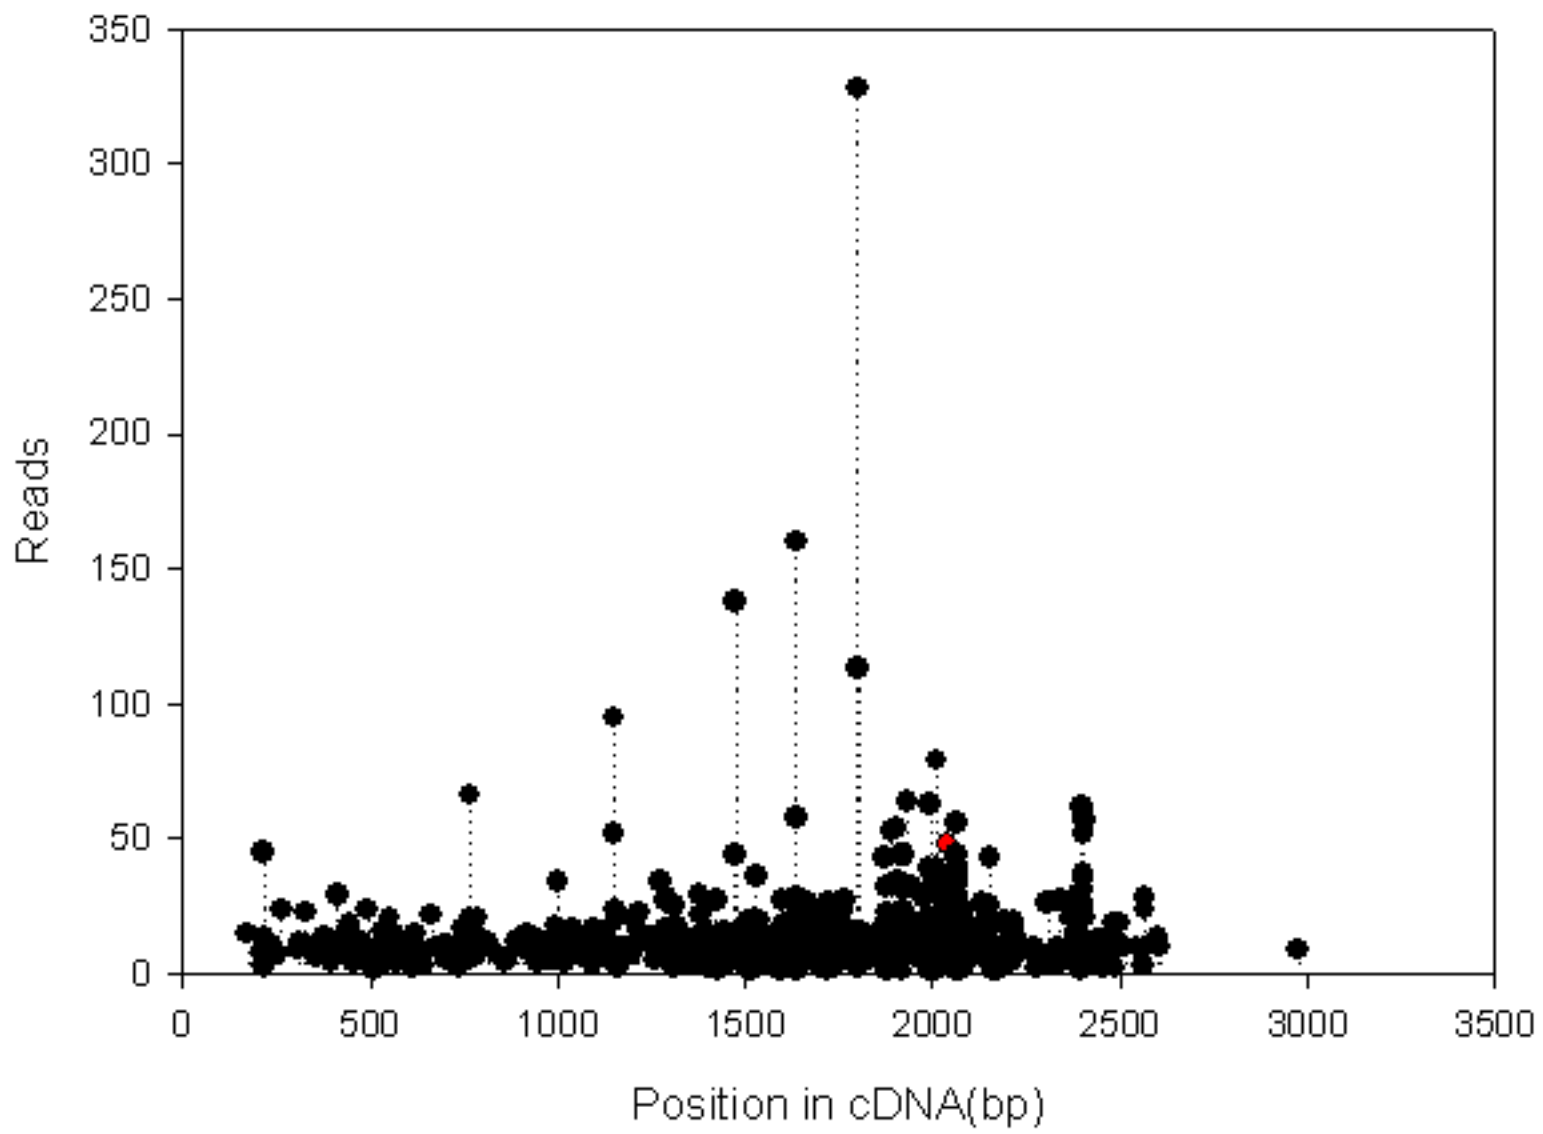

```

5' AGAGCUUCAUCCAUCAAGAUUCUGUG 3'      Cs6g11940.1
   : : : : : : : : : : : : : : : :
3' -----UCGUA-GUAGUUCUAAGGU-- 5'      Csi-miR172c.1

```

Csi-miR172c.1, target=Cs7g23640.1 gene=Cs7g23640  
 Category:2  
 Score=5  
 Cleavage Site=3757

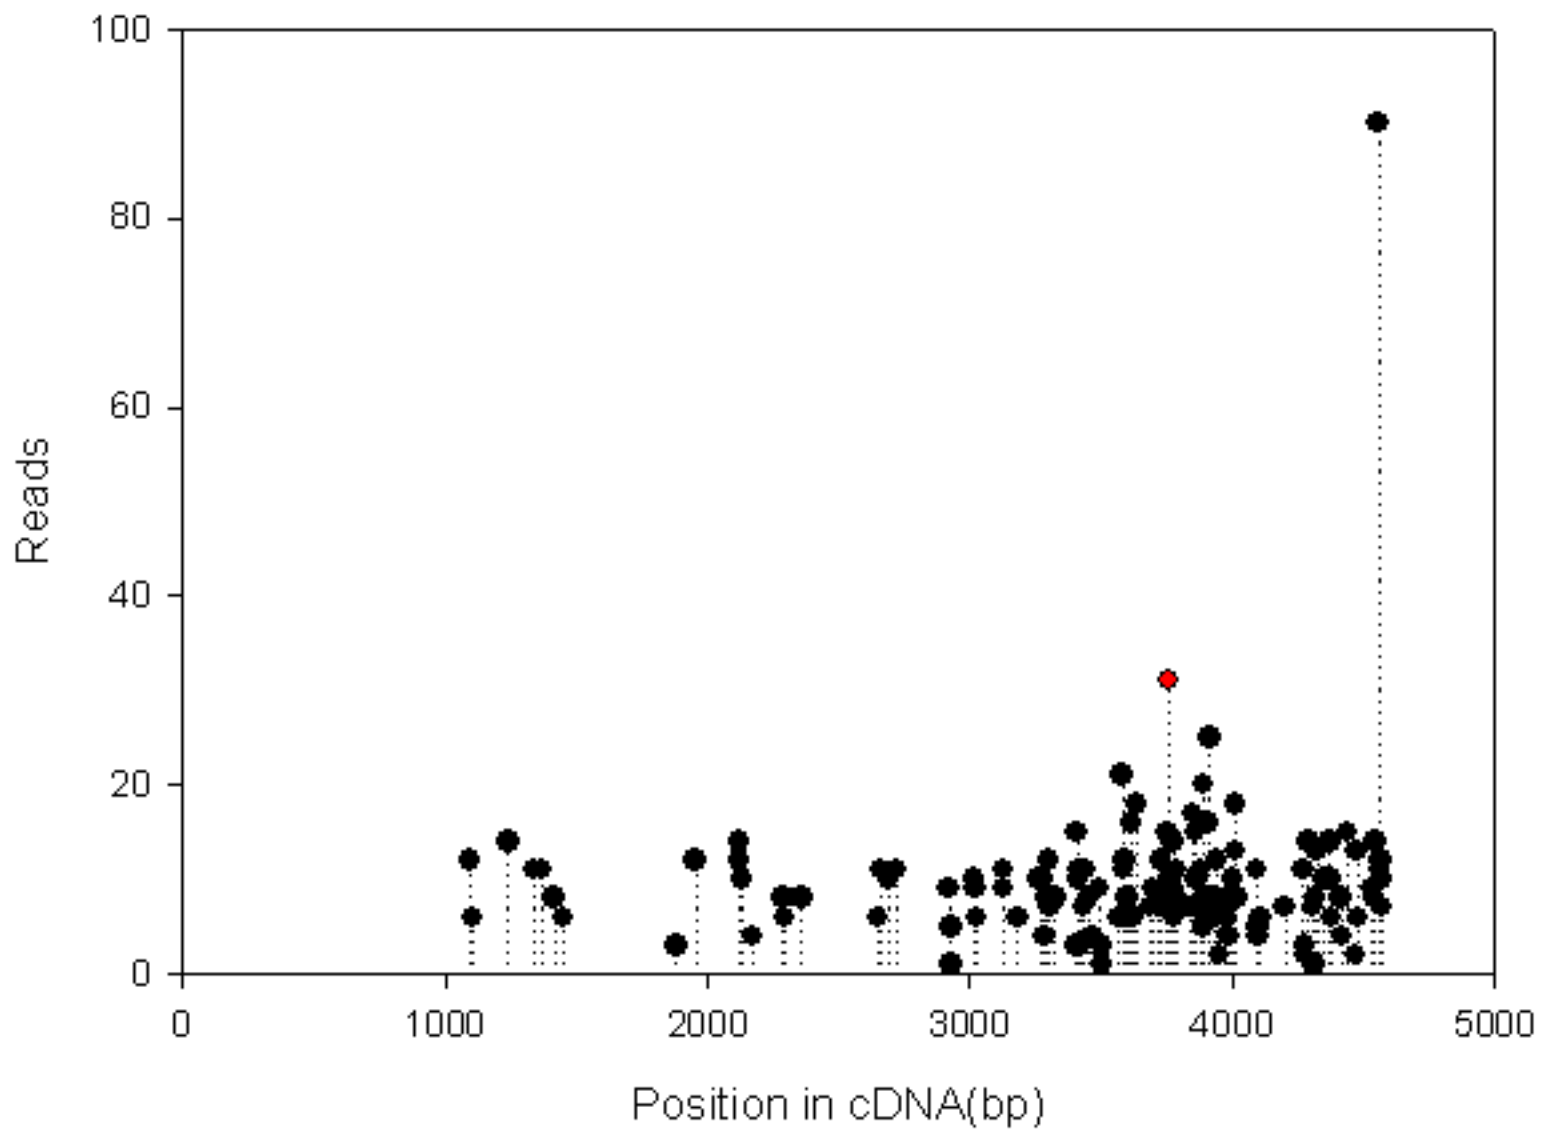

```

5' CCAAUGCCUCGUCAAG-UUCCAUGUUC 3'      Cs7g23640.1
   :: :.:.:.:.:.:.:.:.:.:.
3' ----UCGUAGUAGUUCUAAGGU----- 5'    Csi-miR172c.1
  
```

Csi-miR172c.1, target=Cs7g27790.1 gene=Cs7g27790  
 Category:1  
 Score=3  
 Cleavage Site=1614

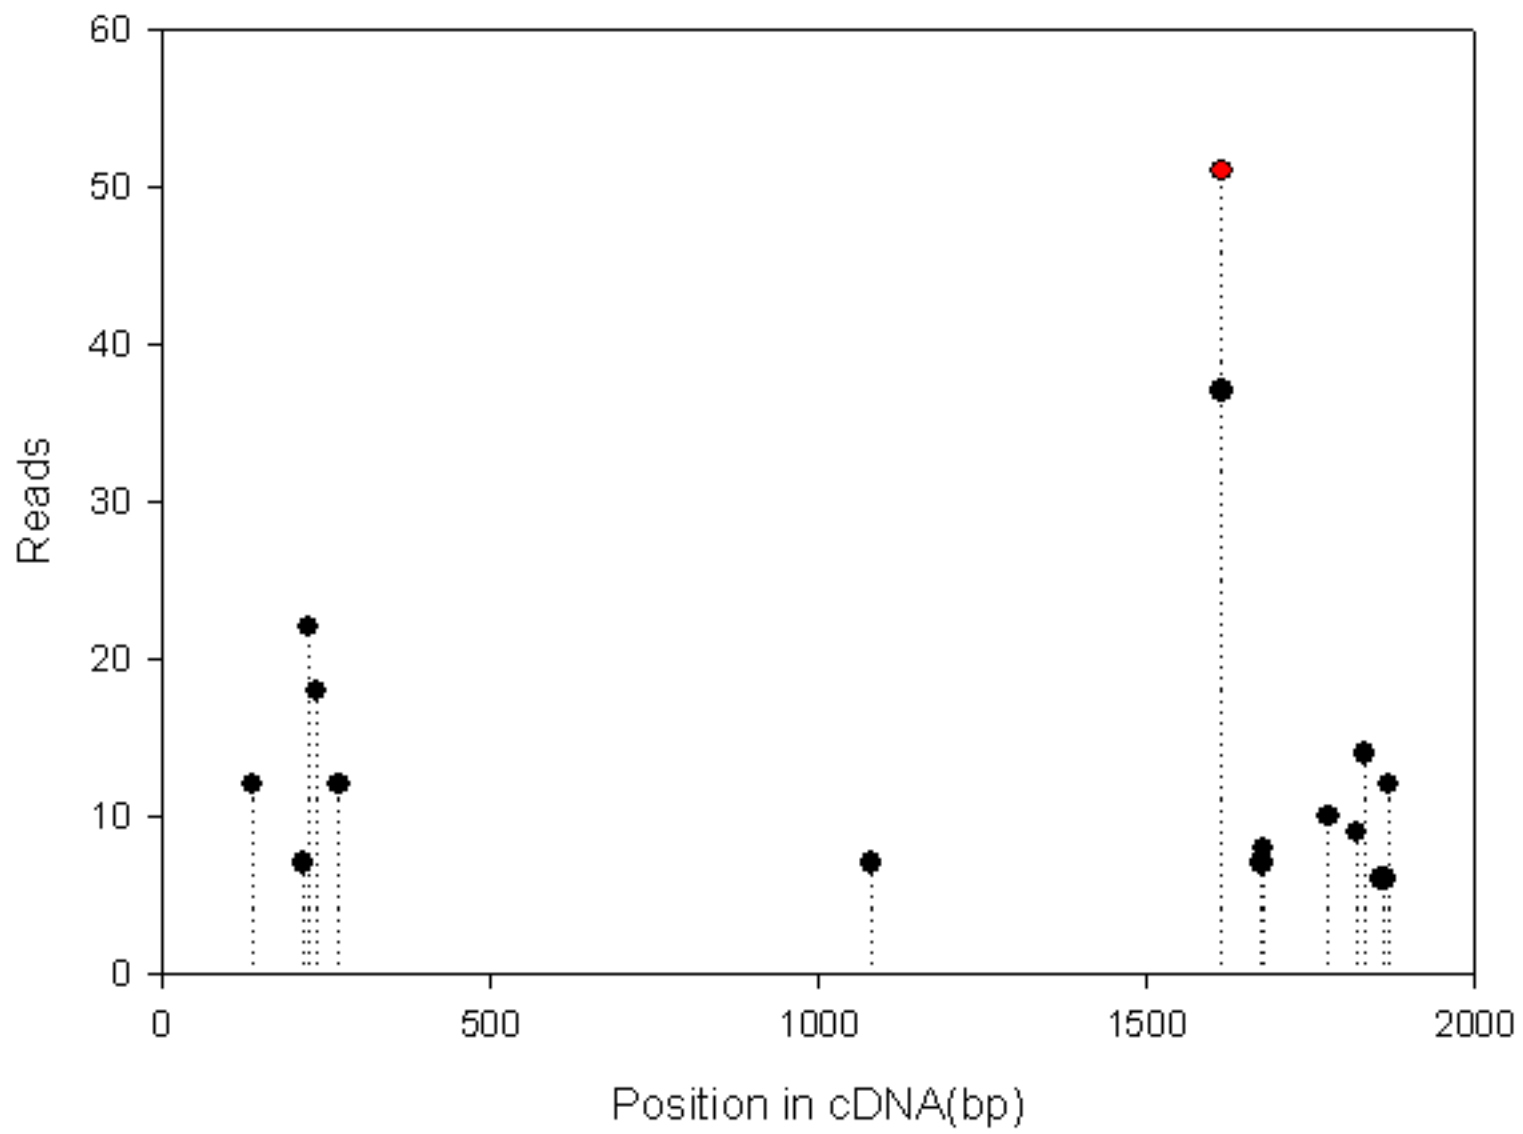

```

5' AGUGCAGCAUCAUCAGGAUUCUCUUC 3'
   ::::::::::::::::::::
3' -----UCGUAGUAGUUCUAAGGU---- 5'
  
```

Cs7g27790.1

Csi-miR172c.1

Csi-miR172c.1, target=Cs7g31800.1 gene=Cs7g31800  
 Category:3  
 Score=5  
 Cleavage Site=762

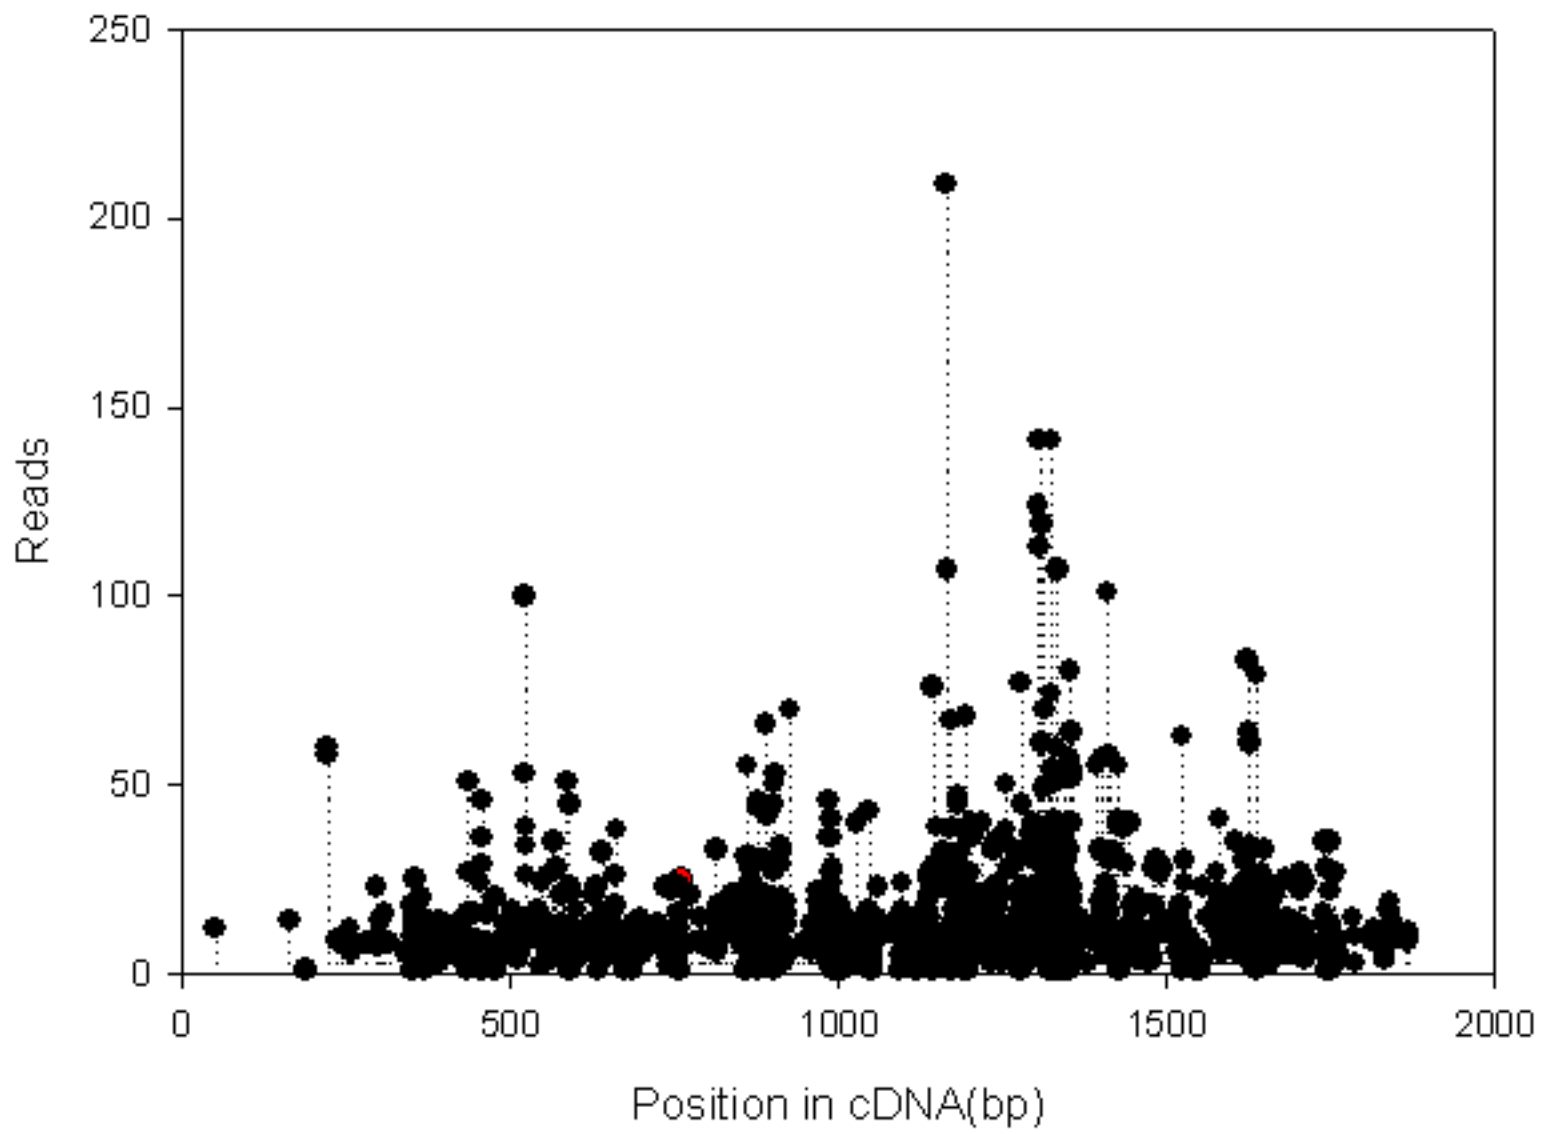

|                                  |               |
|----------------------------------|---------------|
| 5' CUGCCCAACAUCAAGGUUCCUCUCAU 3' | Cs7g31800.1   |
| :: :::::::::::::::               |               |
| 3' ---UCGUAGUAGUUCUAAGGU----- 5' | Csi-miR172c.1 |

Csi-miR172c.1, target=Cs8g17390.1 gene=Cs8g17390  
 Category:1  
 Score=2  
 Cleavage Site=1865

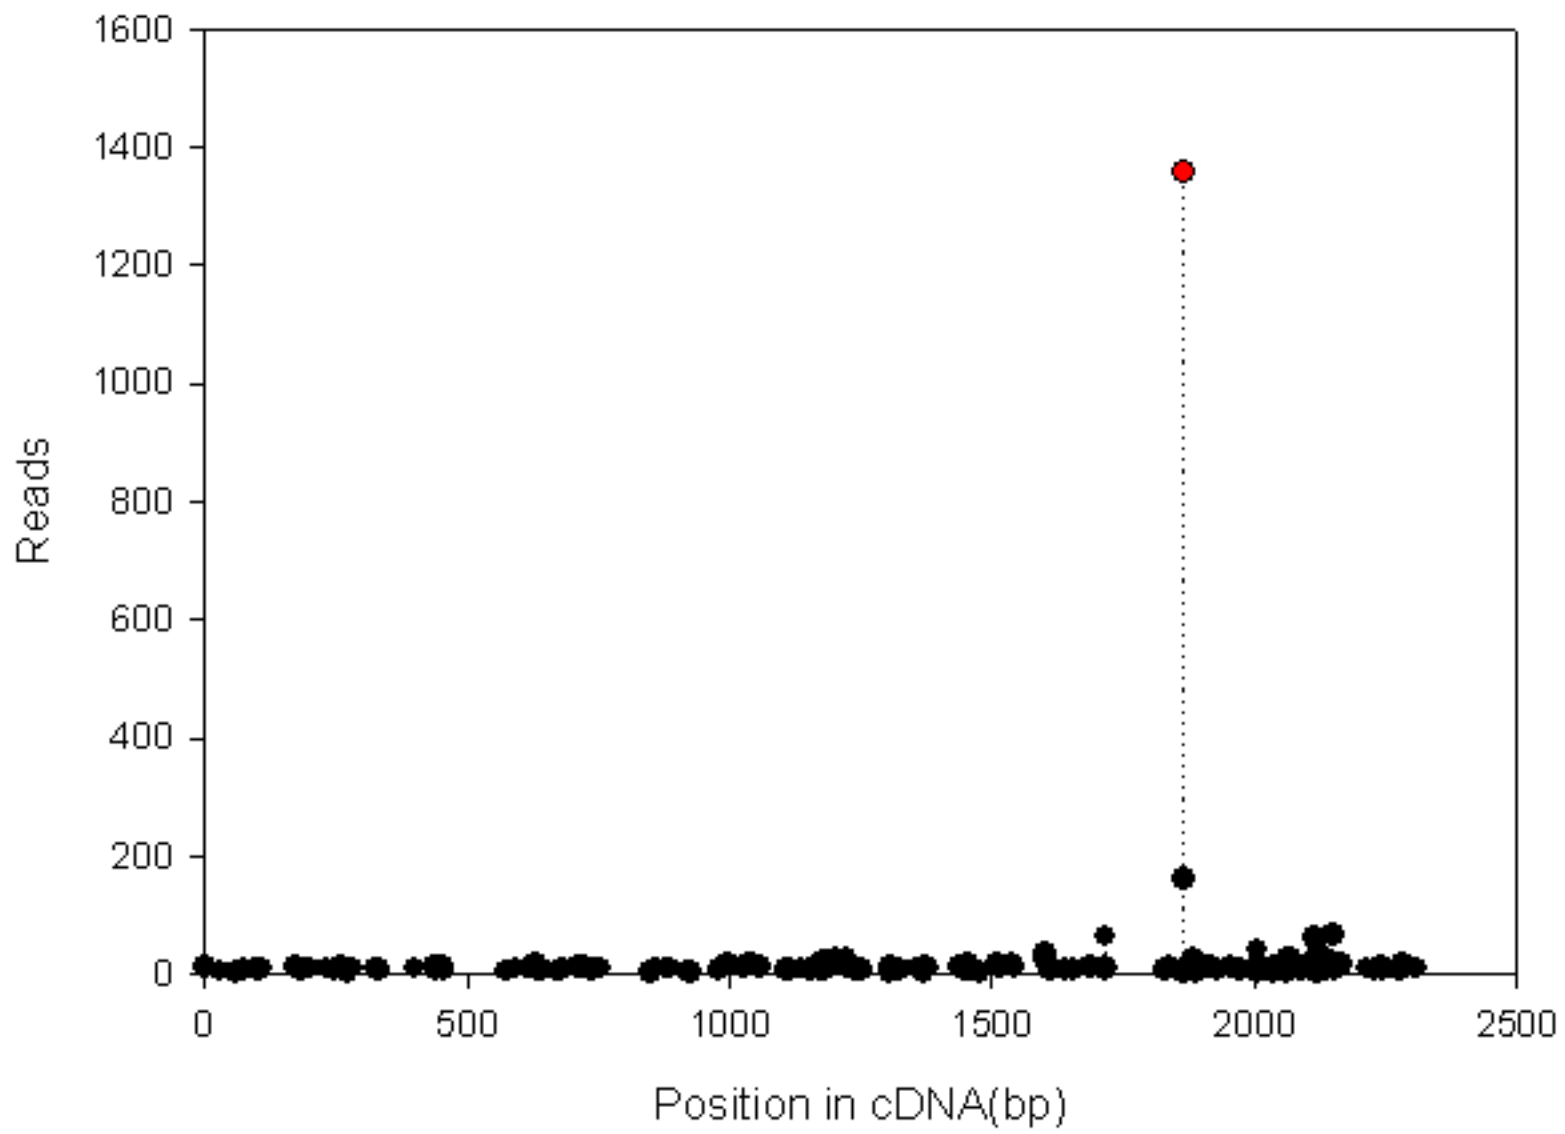

```

5' AGUGCAGCAUCAUCAGGAUCCCAUU 3'      Cs8g17390.1
   ::::::::::::::::::::
3' -----UCGUAGUAGUUCUAAGGU---- 5'    Csi-miR172c.1
  
```

Csi-miR172c.1, target=Orange1.1t04055.1 gene=Orange1.1t04055  
 Category:1  
 Score=2  
 Cleavage Site=2049



5' GCUGCAGCAUCAUCAGGAUCCCUCA 3'  
 :::::::::::::::::::::  
 3' -----UCGUAGUAGUUCUAAGGU--- 5'

Orange1.1t04055.1

Csi-miR172c.1

Csi-miR172c.2, target=Cs7g27790.1 gene=Cs7g27790  
 Category:1  
 Score=4  
 Cleavage Site=1614



5' AGUGCAGCAUCAUCAGGAUUCUCUUC 3'  
 .....  
 3' -GACGUCGUAGUAGUUCUAAGGU--- 5'

Cs7g27790.1

Csi-miR172c.2



Csi-miR172c.2, target=Cs7g31800.1 gene=Cs7g31800  
 Category:3  
 Score=5  
 Cleavage Site=762



```

5' CUGC-CCAACAUCAAGGUUCCUCUCAU 3'      Cs7g31800.1
   :   :  :   :   :   :   :   :   :
3' GACGUCGUAGUAGUUCUAAGGU----- 5'     Csi-miR172c.2

```

Csi-miR172c.2, target=Cs8g17390.1 gene=Cs8g17390  
 Category:1  
 Score=3  
 Cleavage Site=1865



```

5' AGUGCAGCAUCAUCAGGAUUC CCAUU 3'          Cs8g17390.1
   ::::::::::::::::::::
3' -GACGUCGUAGUAGUUCUAAGGU--- 5'          Csi-miR172c.2
  
```

Csi-miR172c.2, target=Orange1.1t04055.1 gene=Orange1.1t04055  
 Category:1  
 Score=2  
 Cleavage Site=2049

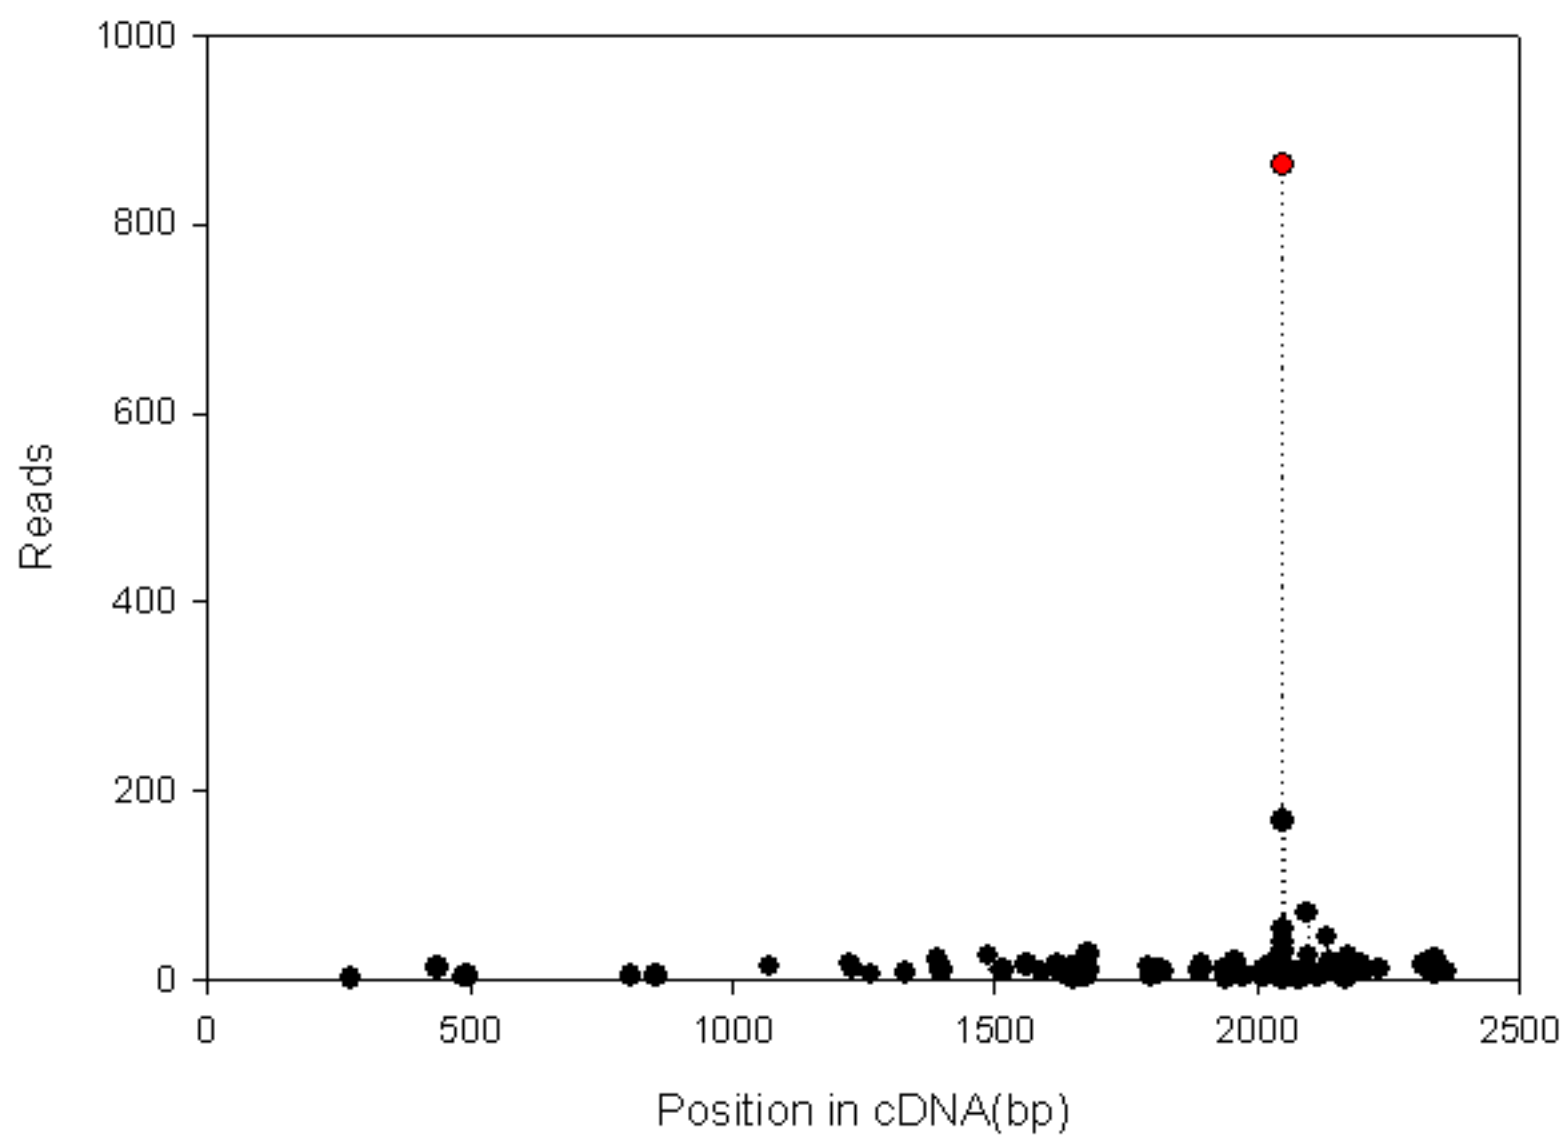

5' GCUGCAGCAUCAUCAGGAUCCCUCA 3'  
 :::::::::::::::::::::  
 3' -GACGUCGUAGUAGUUCUAAGGU--- 5'

Orange1.1t04055.1  
 Csi-miR172c.2

Csi-miR172d, target=Cs7g27790.1 gene=Cs7g27790  
 Category:1  
 Score=1.5  
 Cleavage Site=1614



|    |                            |    |             |
|----|----------------------------|----|-------------|
| 5' | AGUGCAGCAUCAUCAGGAUUCUCUUC | 3' | Cs7g27790.1 |
|    | . . . . .                  |    |             |
| 3' | -UACGUCGUAGUAGUUCUAAGA---- | 5' | Csi-miR172d |

Csi-miR172d, target=Cs8g17390.1 gene=Cs8g17390  
 Category:1  
 Score=2.5  
 Cleavage Site=1865



|    |                                          |    |             |
|----|------------------------------------------|----|-------------|
| 5' | AGUGCAGCAUCAUCAGGAUUC <del>CC</del> CAUU | 3' | Cs8g17390.1 |
|    | . . . . .                                |    |             |
| 3' | -UACGUCGUAGUAGUUCUAAGA----               | 5' | Csi-miR172d |

Csi-miR172d, target=Orange1.1t04055.1 gene=Orange1.1t04055  
 Category:1  
 Score=3  
 Cleavage Site=2049

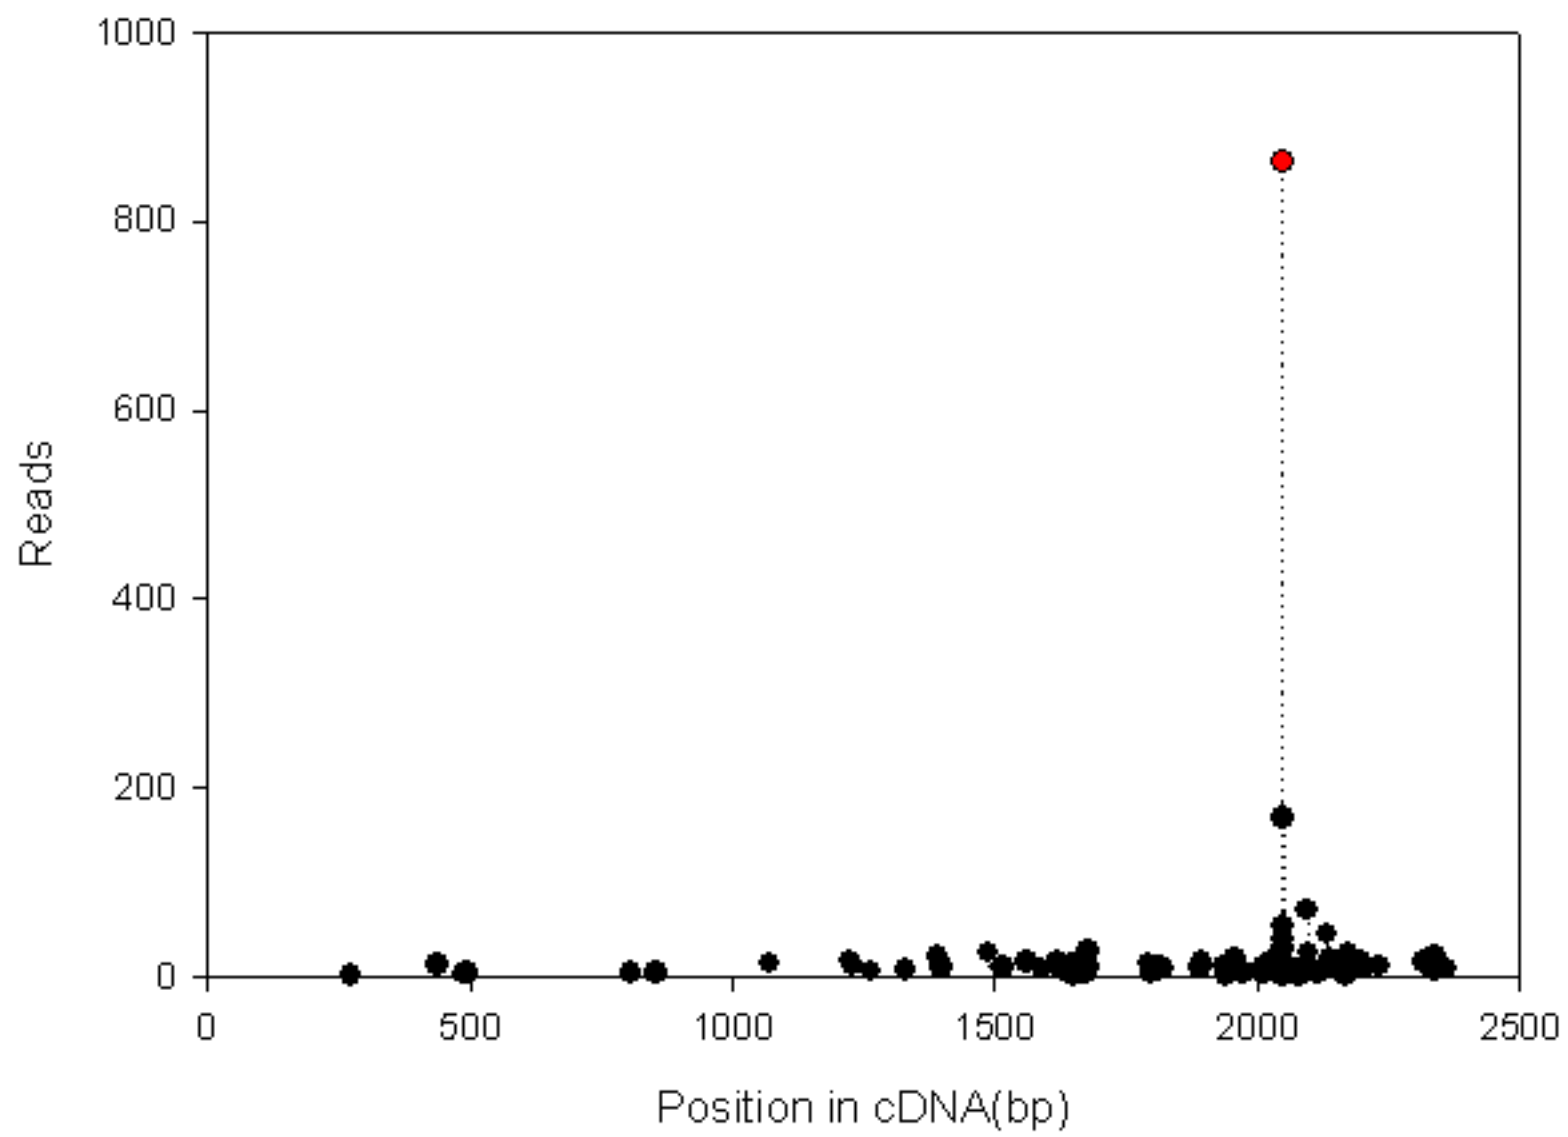

```

5' GCUGCAGCAUCAUCAGGAUCCCUCA 3'
   ::::::::::::::::::::
3' -UACGUCGUAGUAGUUCUAAGA---- 5'

```

Orange1.1t04055.1

Csi-miR172d

Csi-miR172d-3p, target=Cs5g21000.1 gene=Cs5g21000  
 Category:3  
 Score=5  
 Cleavage Site=748

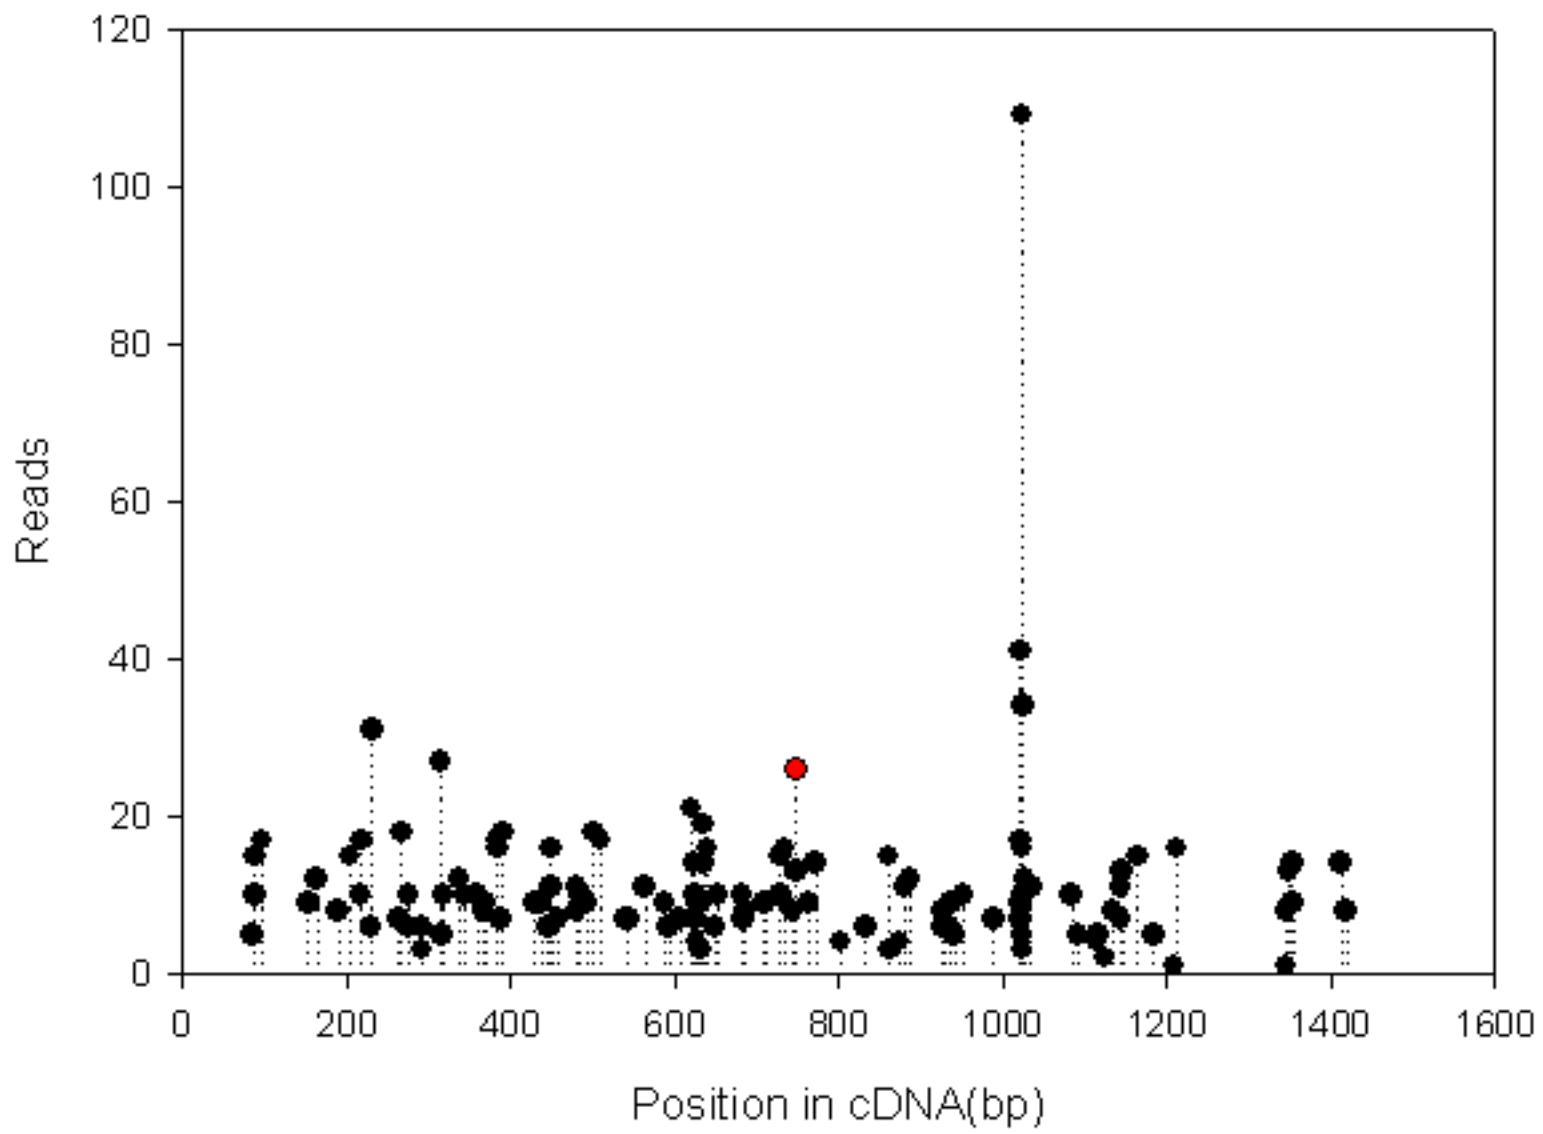

```

5' AACAAAGUUUGGAU-UUGAUGAUGCUUU 3'      Cs5g21000.1
   : :.: : : : : : : : : : : : : .
3' -----ACACUUAGAACUACUACGACG 5'      Csi-miR172d-3p

```

Csi-miR172d-3p, target=Cs9g03090.1 gene=Cs9g03090  
 Category:3  
 Score=4.5  
 Cleavage Site=2766

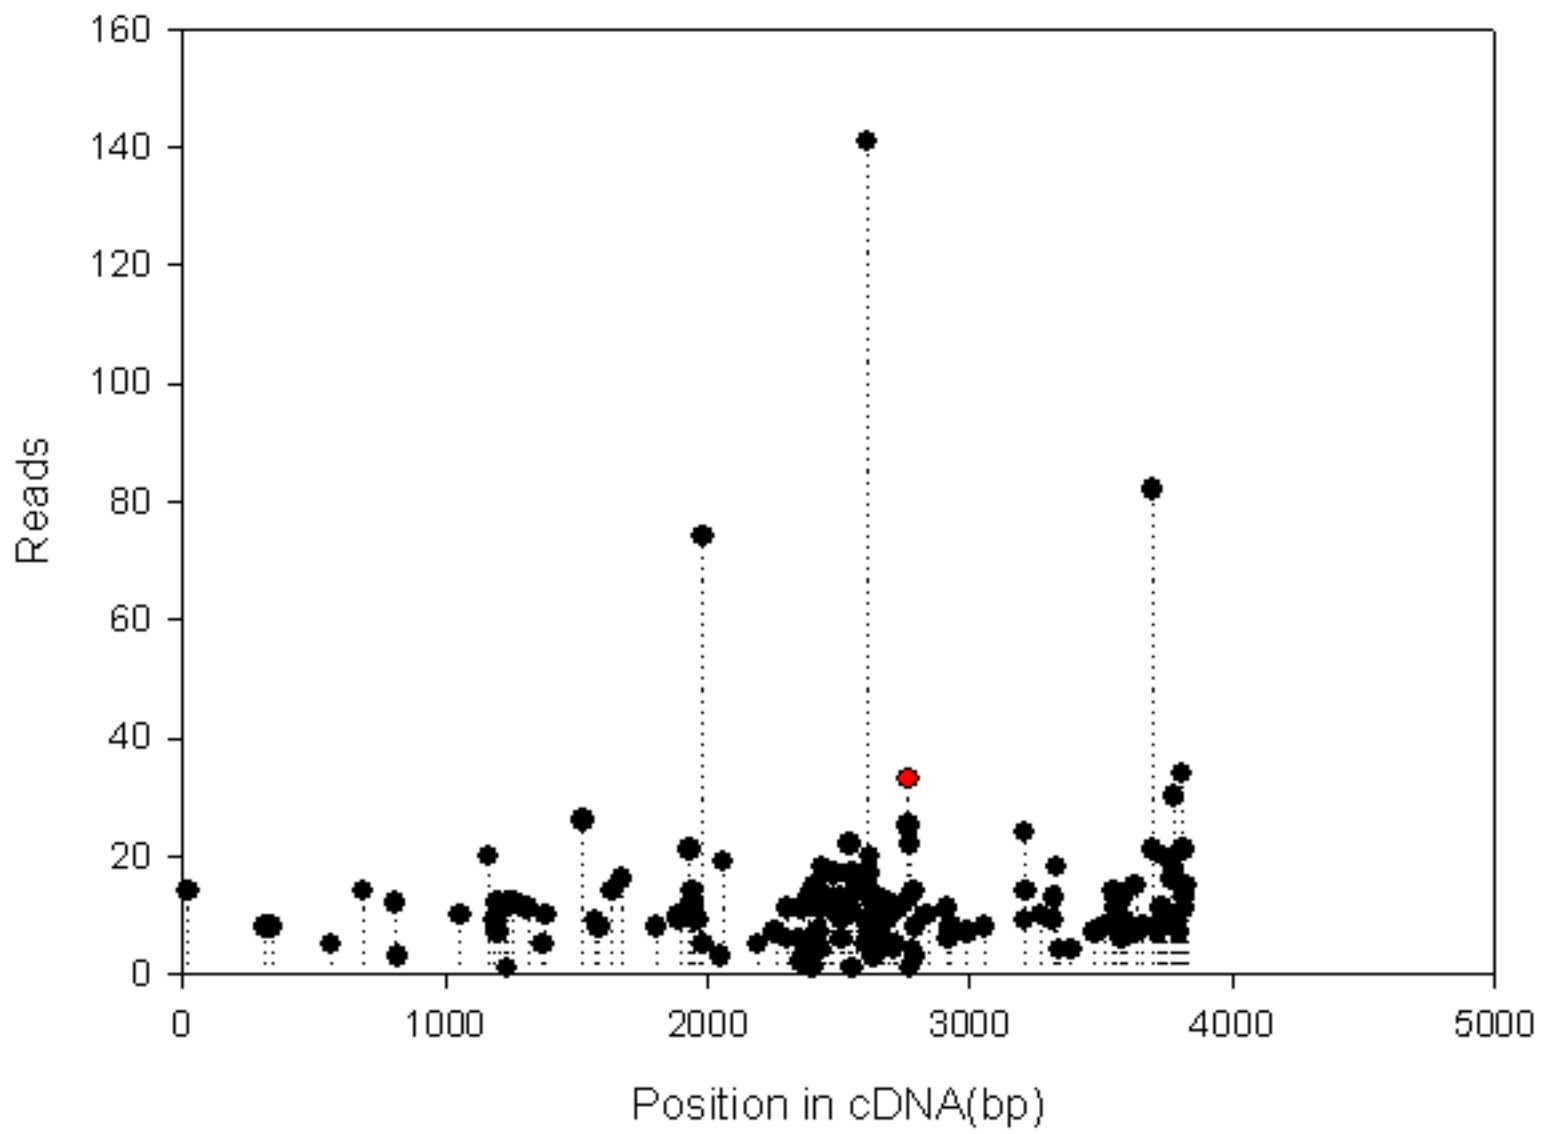

```

5' CAAUCUGCAUUUUUGAUGAUGUUGCU 3'           Cs9g03090.1
   :  :  :  :  :  :  :  :  :  :  :  :  :  :
3' ---ACAC-UUAGAACUACUACGACG- 5'           Csi-miR172d-3p

```



Csi-miR172e.2, target=Cs7g27790.1 gene=Cs7g27790  
 Category:1  
 Score=1.5  
 Cleavage Site=1614



5' AGUGCAGCAUCAUCAGGAUUCUCUUC 3'  
 . . . . .  
 3' -UACGUCGUAGUAGUUCUAAG----- 5'

Cs7g27790.1  
 Csi-miR172e.2

Csi-miR172e.2, target=Cs8g17390.1 gene=Cs8g17390  
 Category:1  
 Score=1.5  
 Cleavage Site=1865

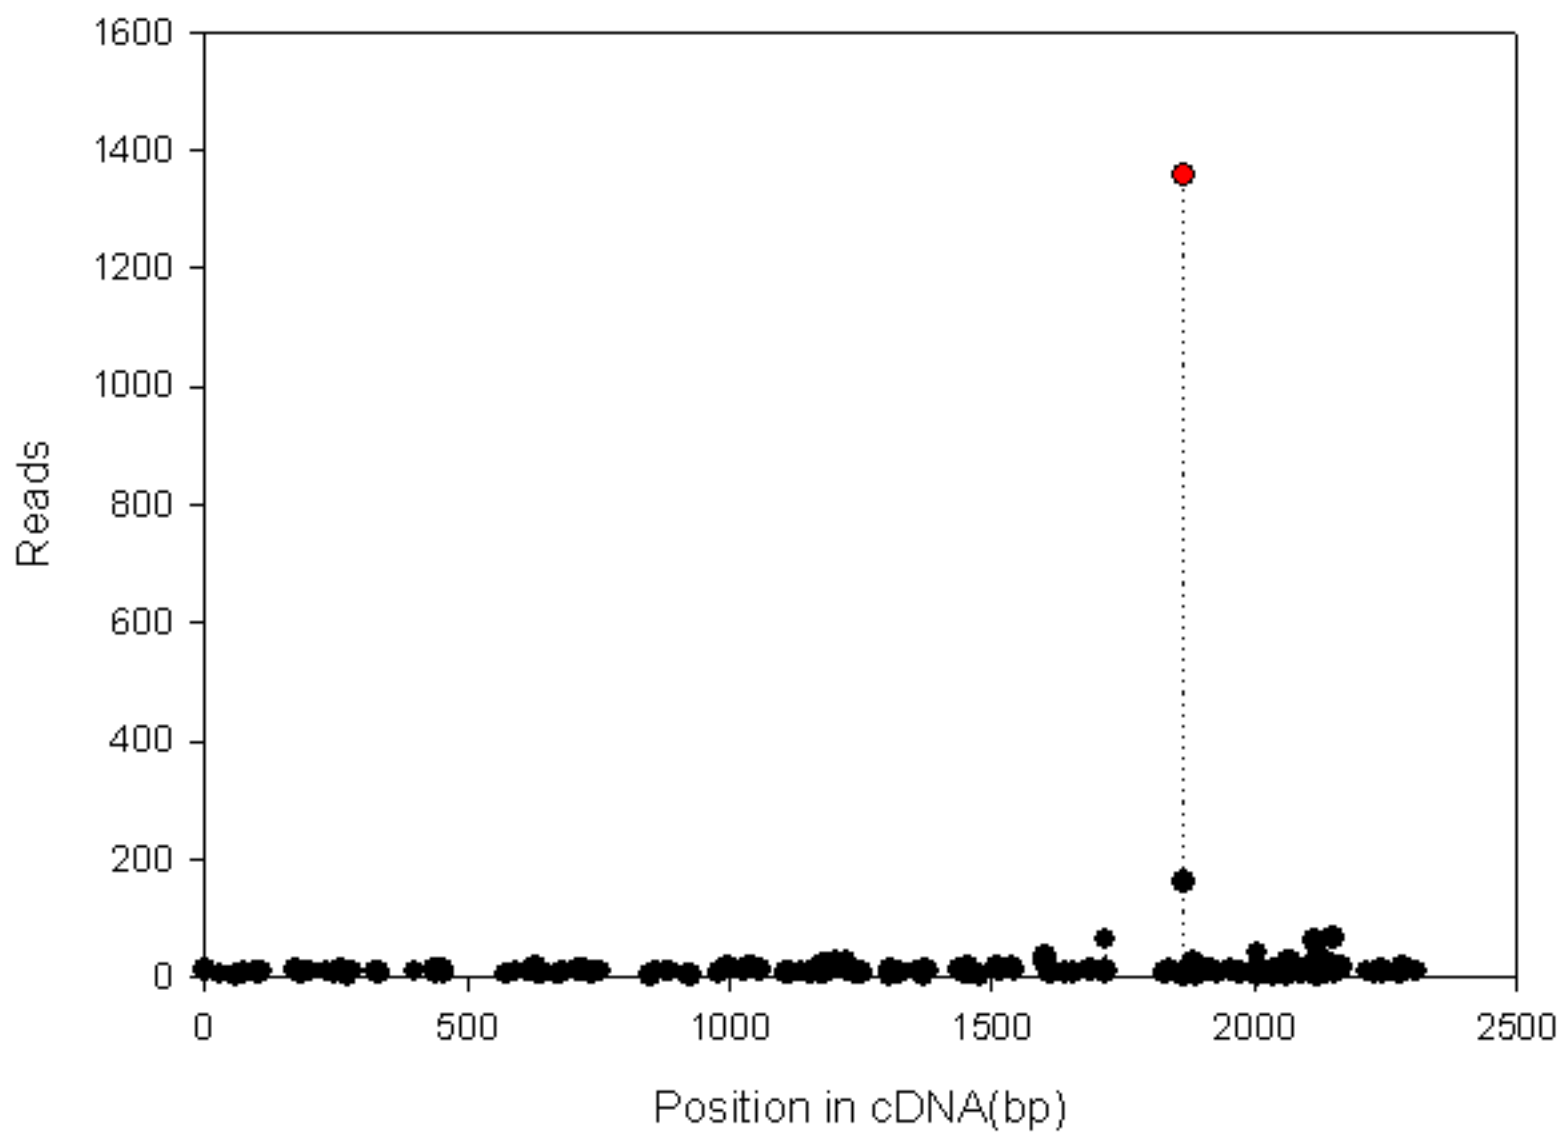

```

5' AGUGCAGCAUCAUCAGGAUUC CCAUU 3'      Cs8g17390.1
   . . . . .
3' -UACGUCGUAGUAGUUCUAAG----- 5'     Csi-miR172e.2
  
```

Csi-miR172e.2, target=Cs9g07740.1 gene=Cs9g07740  
 Category:3  
 Score=5  
 Cleavage Site=3319

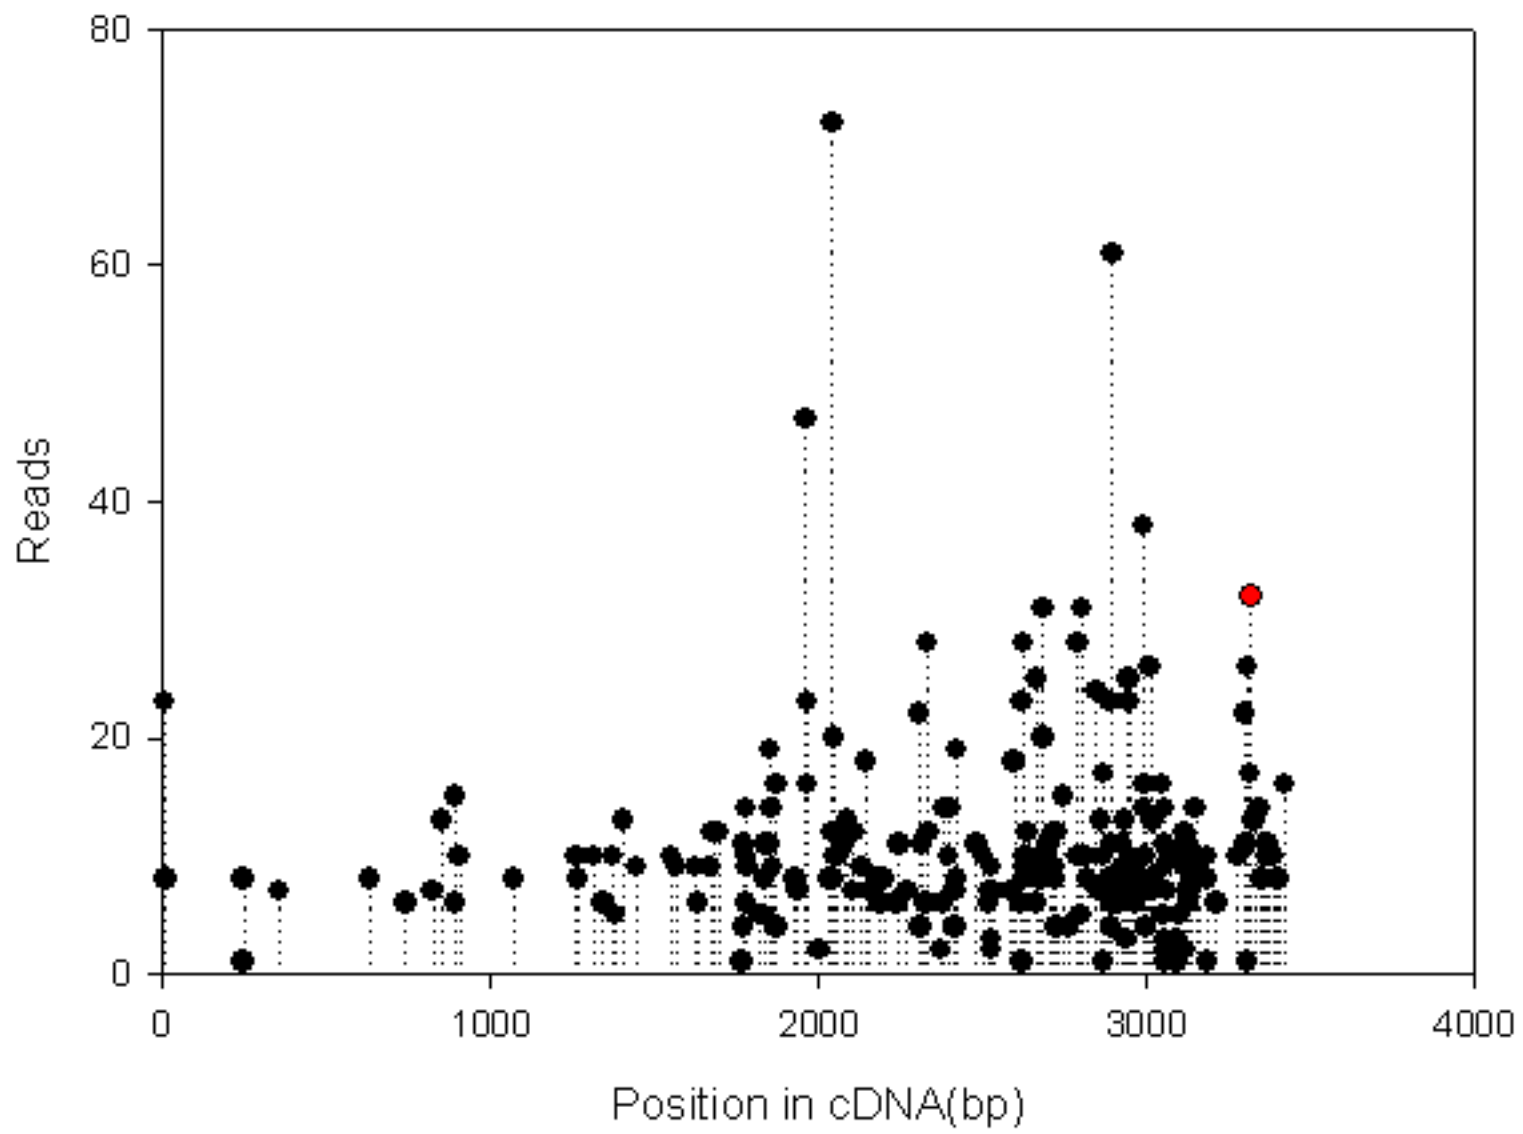

```

5' AUGUAUGAUCAUGAAGAUAUUGGCAUU 3'          Cs9g07740.1
   : : : : : : : : : : : : : : :
3' UACGUCGUAGUAGUUCUAAG----- 5'          Csi-miR172e.2
  
```

Csi-miR172e.2, target=Orange1.1t04055.1 gene=Orange1.1t04055  
 Category:1  
 Score=2  
 Cleavage Site=2049

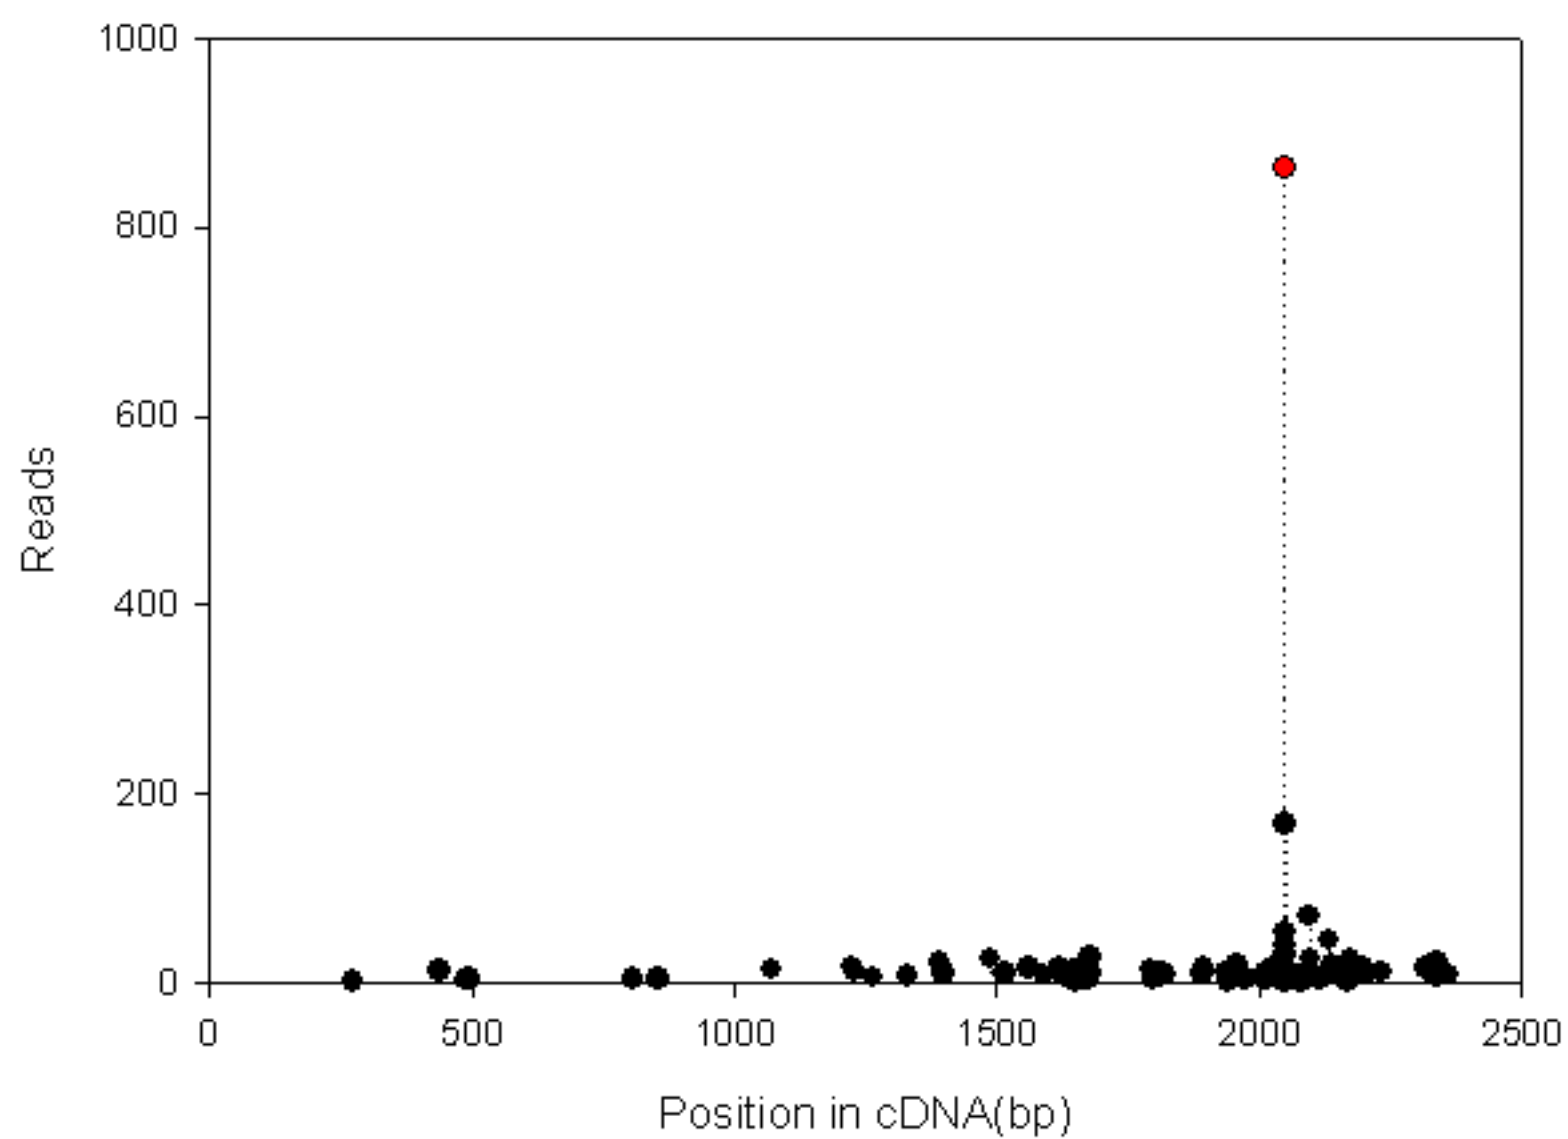

5' GCUGCAGCAUCAUCAGGAUCCCUCA 3'  
 :::::::::::::::::::::  
 3' -UACGUCGUAGUAGUUCUAAG----- 5'

Orange1.1t04055.1  
 Csi-miR172e.2

Csi-miR172k, target=Cs7g27790.1 gene=Cs7g27790  
 Category:1  
 Score=2.5  
 Cleavage Site=1614



```

5' AGUGCAGCAUCAUCAGGAUUCUCUUC 3'      Cs7g27790.1
   . . . . .
3' -UACGUCGUAGUAGUUCUAAGU---- 5'      Csi-miR172k
  
```

Csi-miR172k, target=Cs8g17390.1 gene=Cs8g17390  
 Category:1  
 Score=2.5  
 Cleavage Site=1865



```

5' AGUGCAGCAUCAUCAGGAUCCCAUU 3'      Cs8g17390.1
   .:.:.:.:.:.:.:.:.:.:.:.:.:.:.:.
3' -UACGUCGUAGUAGUUCUAAGU---- 5'      Csi-miR172k
  
```

Csi-miR172k, target=Orange1.1t04055.1 gene=Orange1.1t04055

Category:1

Score=5

Cleavage Site=2049



5' GCUGCAGCAUCAUCAGGAUCCCUCA 3'  
          :::~::~:  
3' -UACGUCGUAGUAGUUCUAAGU----- 5'

Orange1.1t04055.1

Csi-miR172k

Csi-miR2118.1, target=Orange1.1t00149.1 gene=Orange1.1t00149  
 Category:2  
 Score=4.5  
 Cleavage Site=98

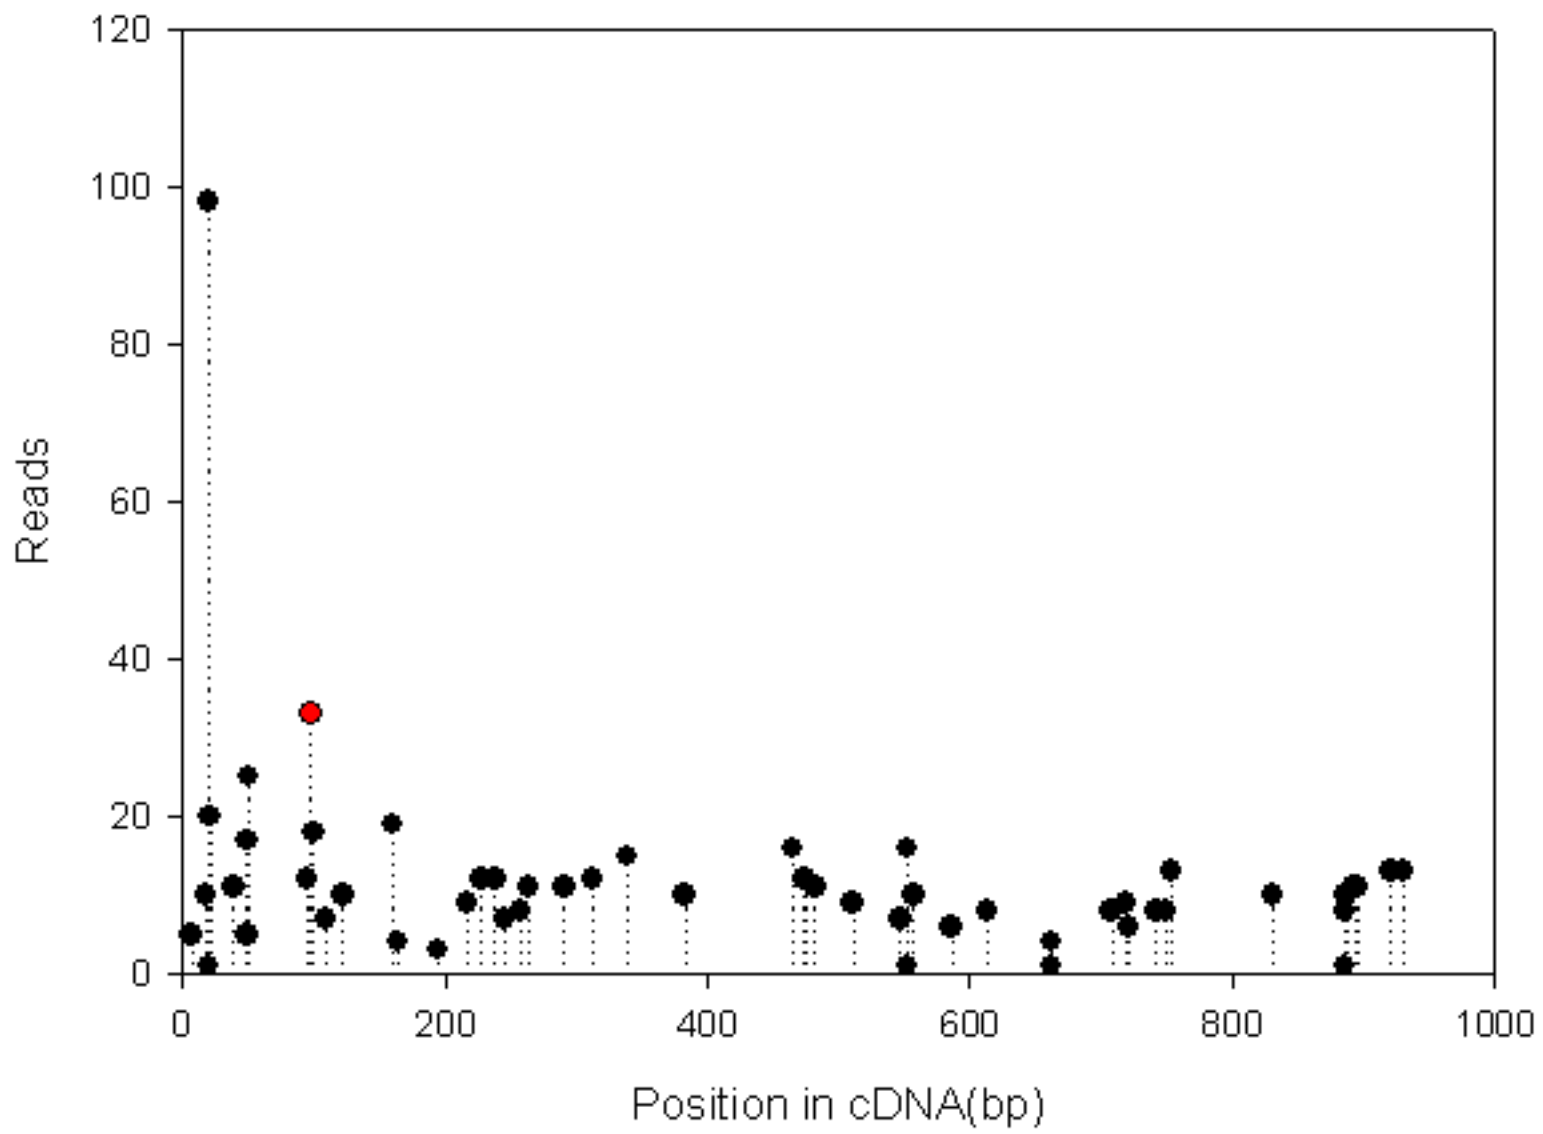

```

5' ACGGAGUGGGUGGCAUA-GUGAUGGCC 3'      Orange1.1t00149.1
   : : : : : : : : : : : : : : : : : :
3' UUCCUUACCCACCGUAUCCAUU----- 5'    Csi-miR2118.1
  
```



Csi-miR2118.1, target=Orange1.1t00557.1 gene=Orange1.1t00557  
 Category:1  
 Score=4  
 Cleavage Site=131

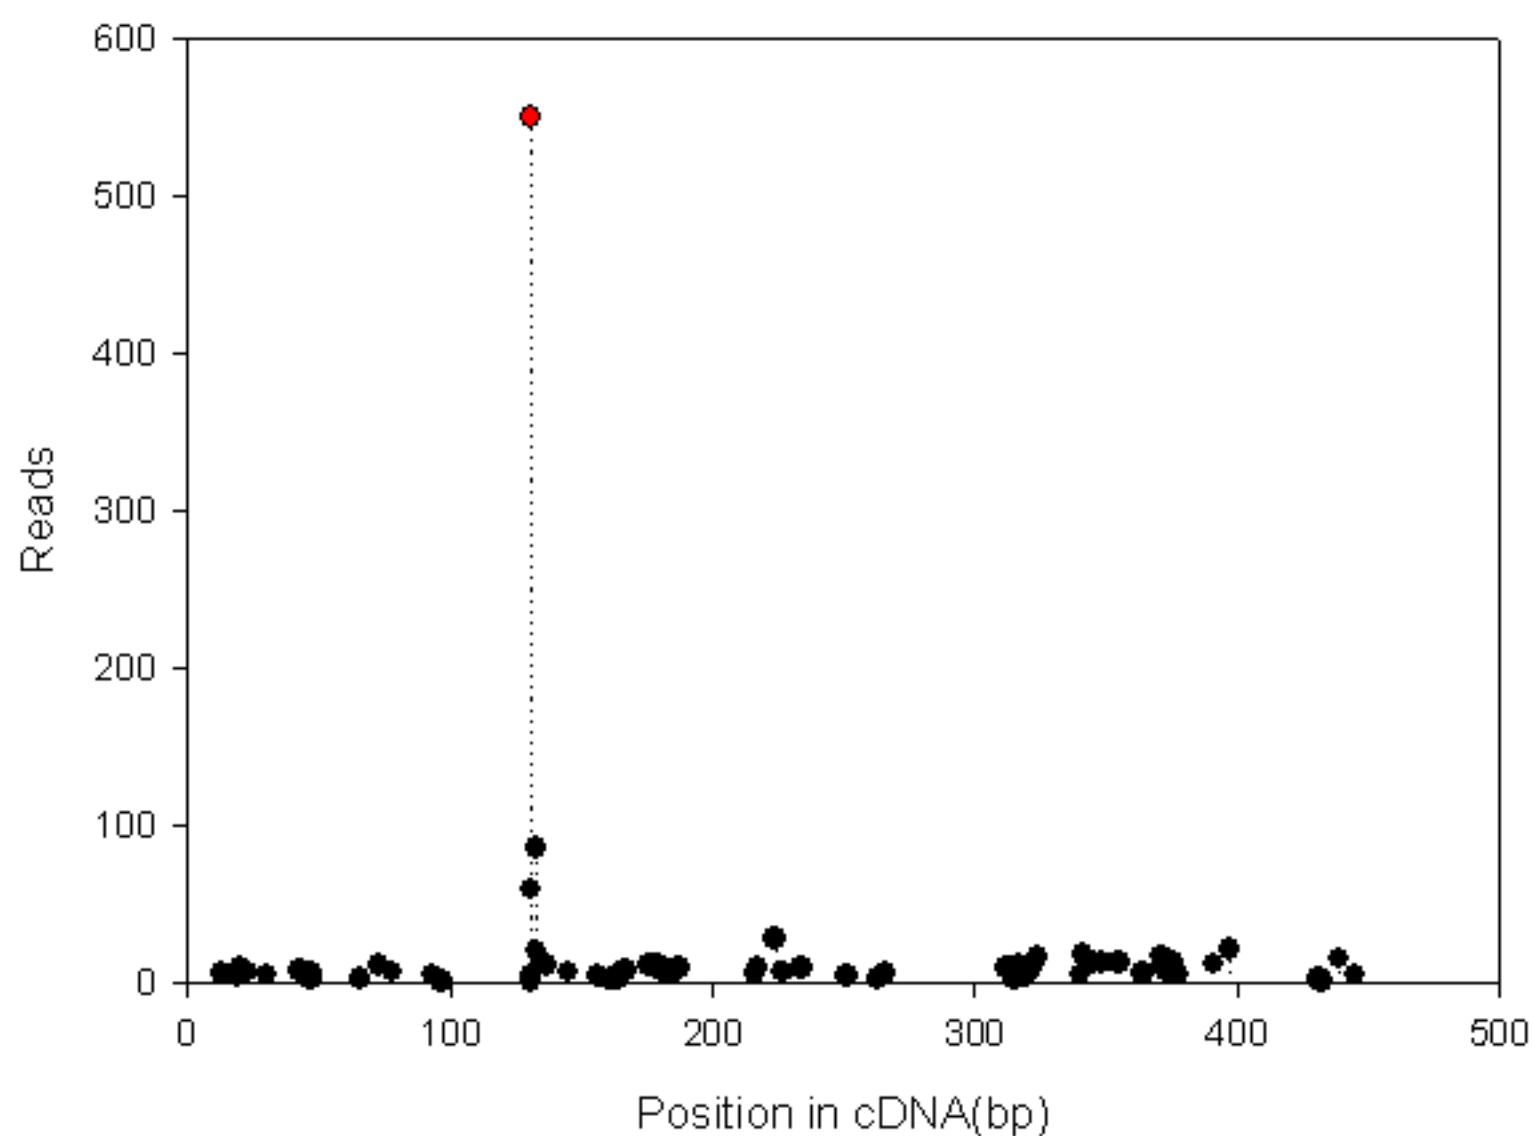

|                                  |                   |
|----------------------------------|-------------------|
| 5' AAGACAUGGGUGGCAUAGGUCACAUC 3' | Orange1.1t00557.1 |
| ... ..                           |                   |
| 3' UCCCUUACCCACCGUAUCCAUU---- 5' | Csi-miR2118.1     |

Csi-miR2118.1, target=Orange1.1t02171.1 gene=Orange1.1t02171  
 Category:3  
 Score=5  
 Cleavage Site=662

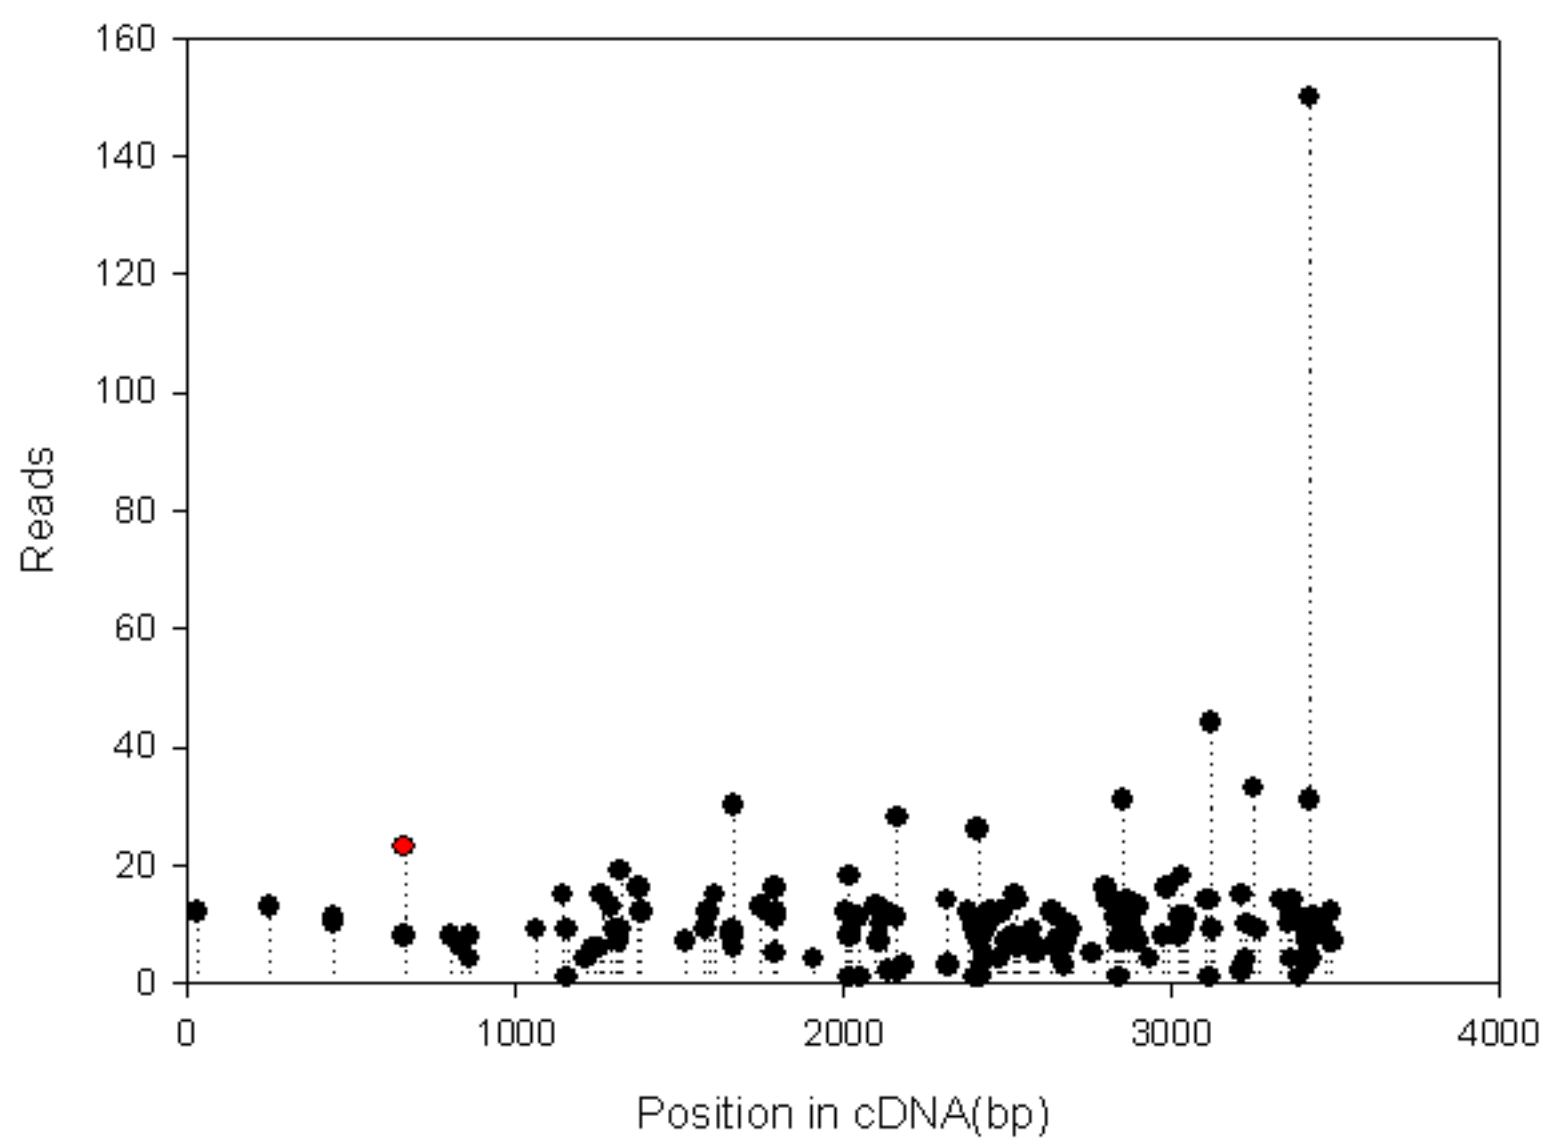

|    |                            |    |                   |
|----|----------------------------|----|-------------------|
| 5' | GGGGCAUGGGUGGUAUAGGCAAACC  | 3' | Orange1.1t02171.1 |
|    | ..:: :::::..:..:..: ::     |    |                   |
| 3' | UCCCUUACCCACCGUAUCCAUU---- | 5' | Csi-miR2118.1     |

Csi-miR2118.1, target=Orange1.1t02175.1 gene=Orange1.1t02175  
 Category:3  
 Score=5  
 Cleavage Site=735

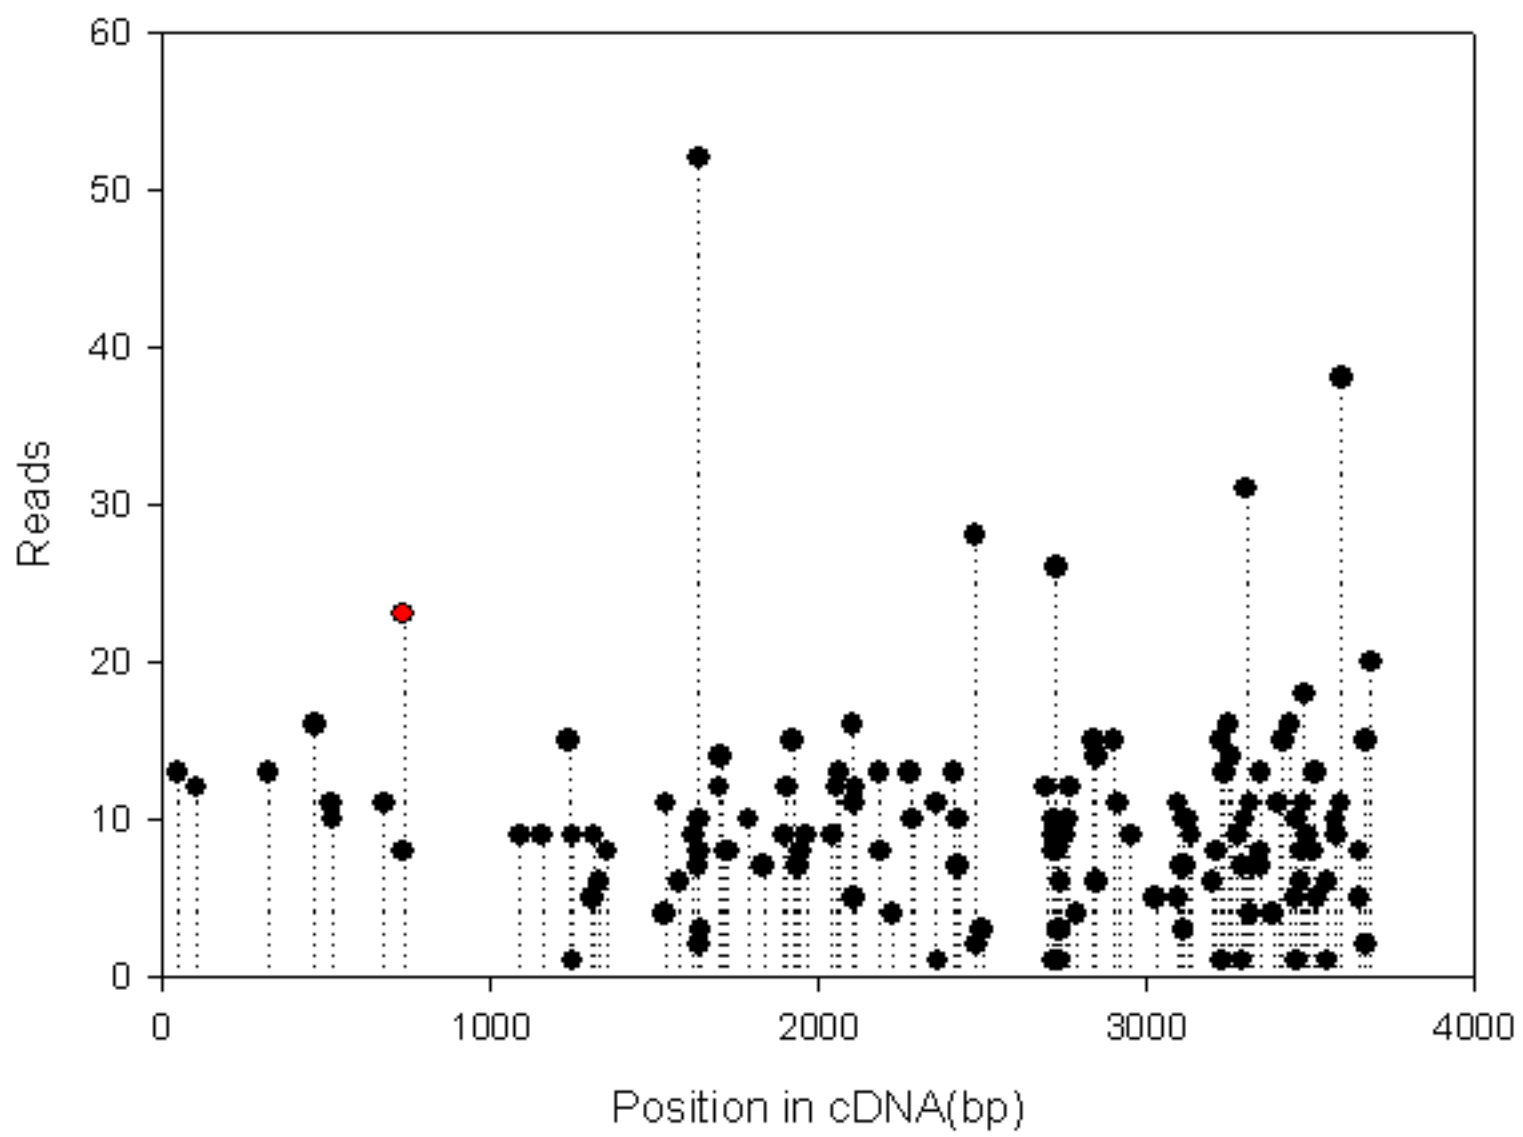

5' GGGGCAUGGGUGGUUAUAGGCAAACC 3'  
 ..:: :::::::::::::: ::  
 3' UCCCUUACCCACCGUAUCCAUU---- 5'

Orange1.1t02175.1  
 Csi-miR2118.1

Csi-miR2118.2, target=Cs2g09590.1 gene=Cs2g09590  
 Category:1  
 Score=4  
 Cleavage Site=769

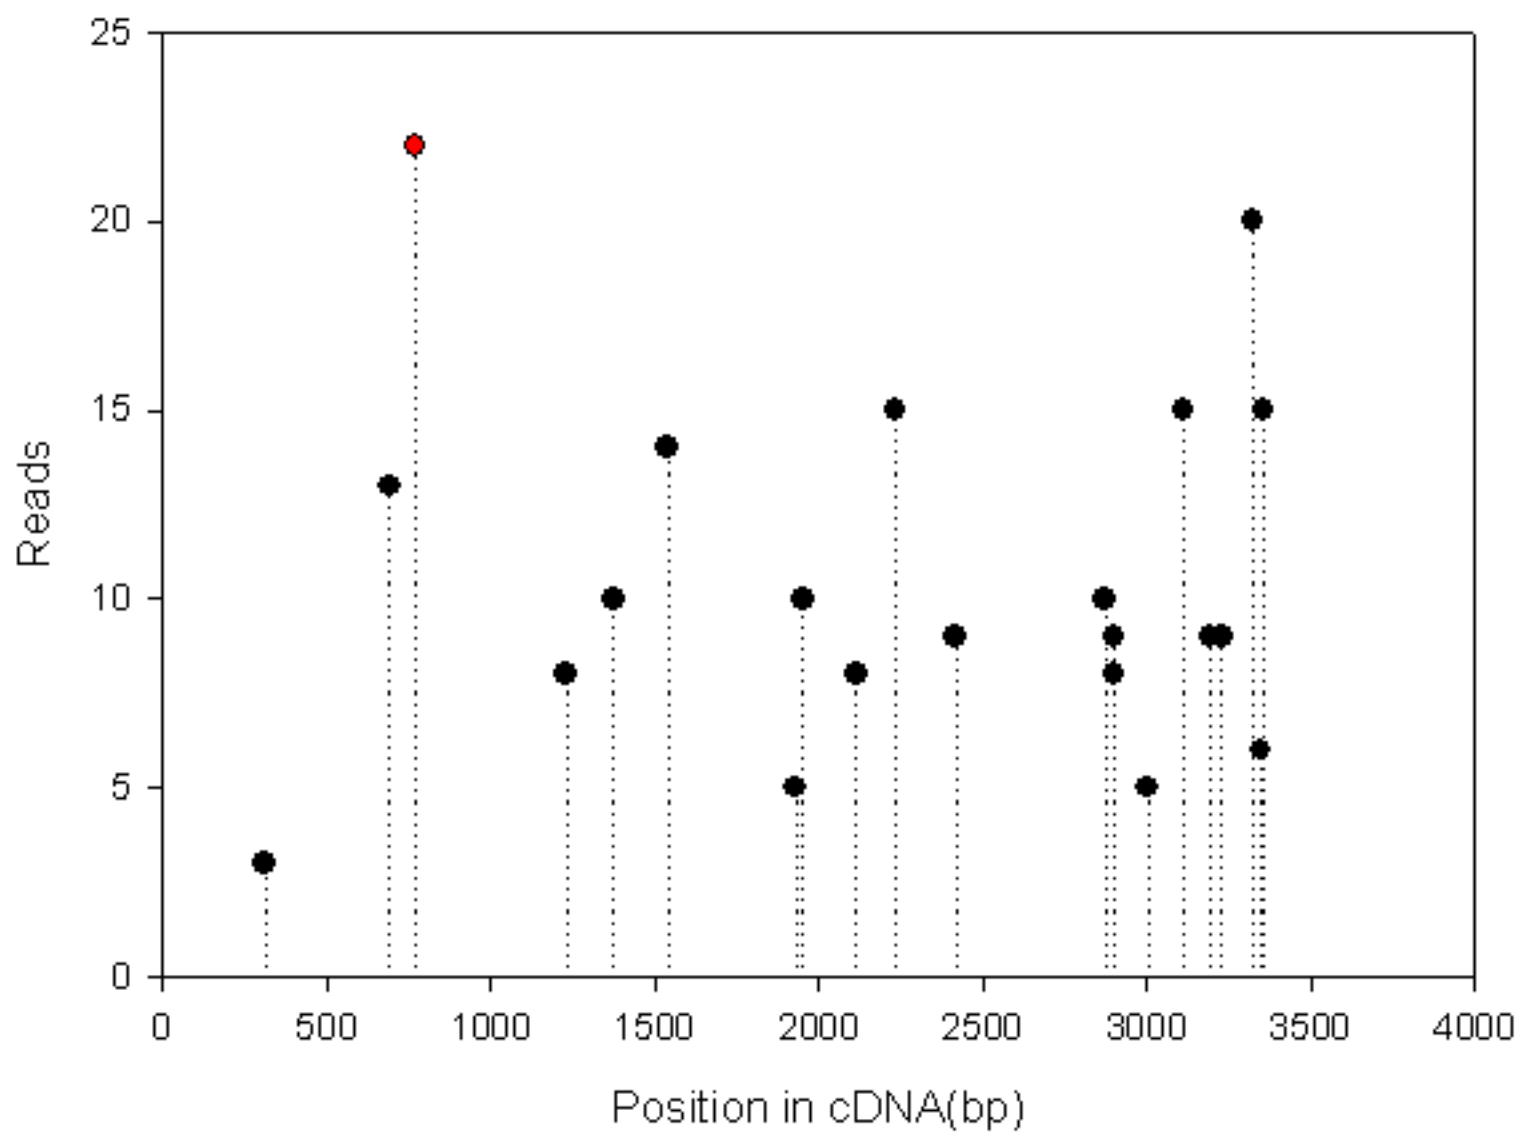

```

5' GGUAUGGGUGGCAUAGGGGACUCAUU 3'      Cs2g09590.1
  :: :::::::::::::::::::: .:
3' CCUUACCCACCGUAUCCAUU----- 5'      Csi-miR2118.2

```

Csi-miR2118.2, target=Cs2g30960.1 gene=Cs2g30960  
 Category:1  
 Score=5  
 Cleavage Site=694

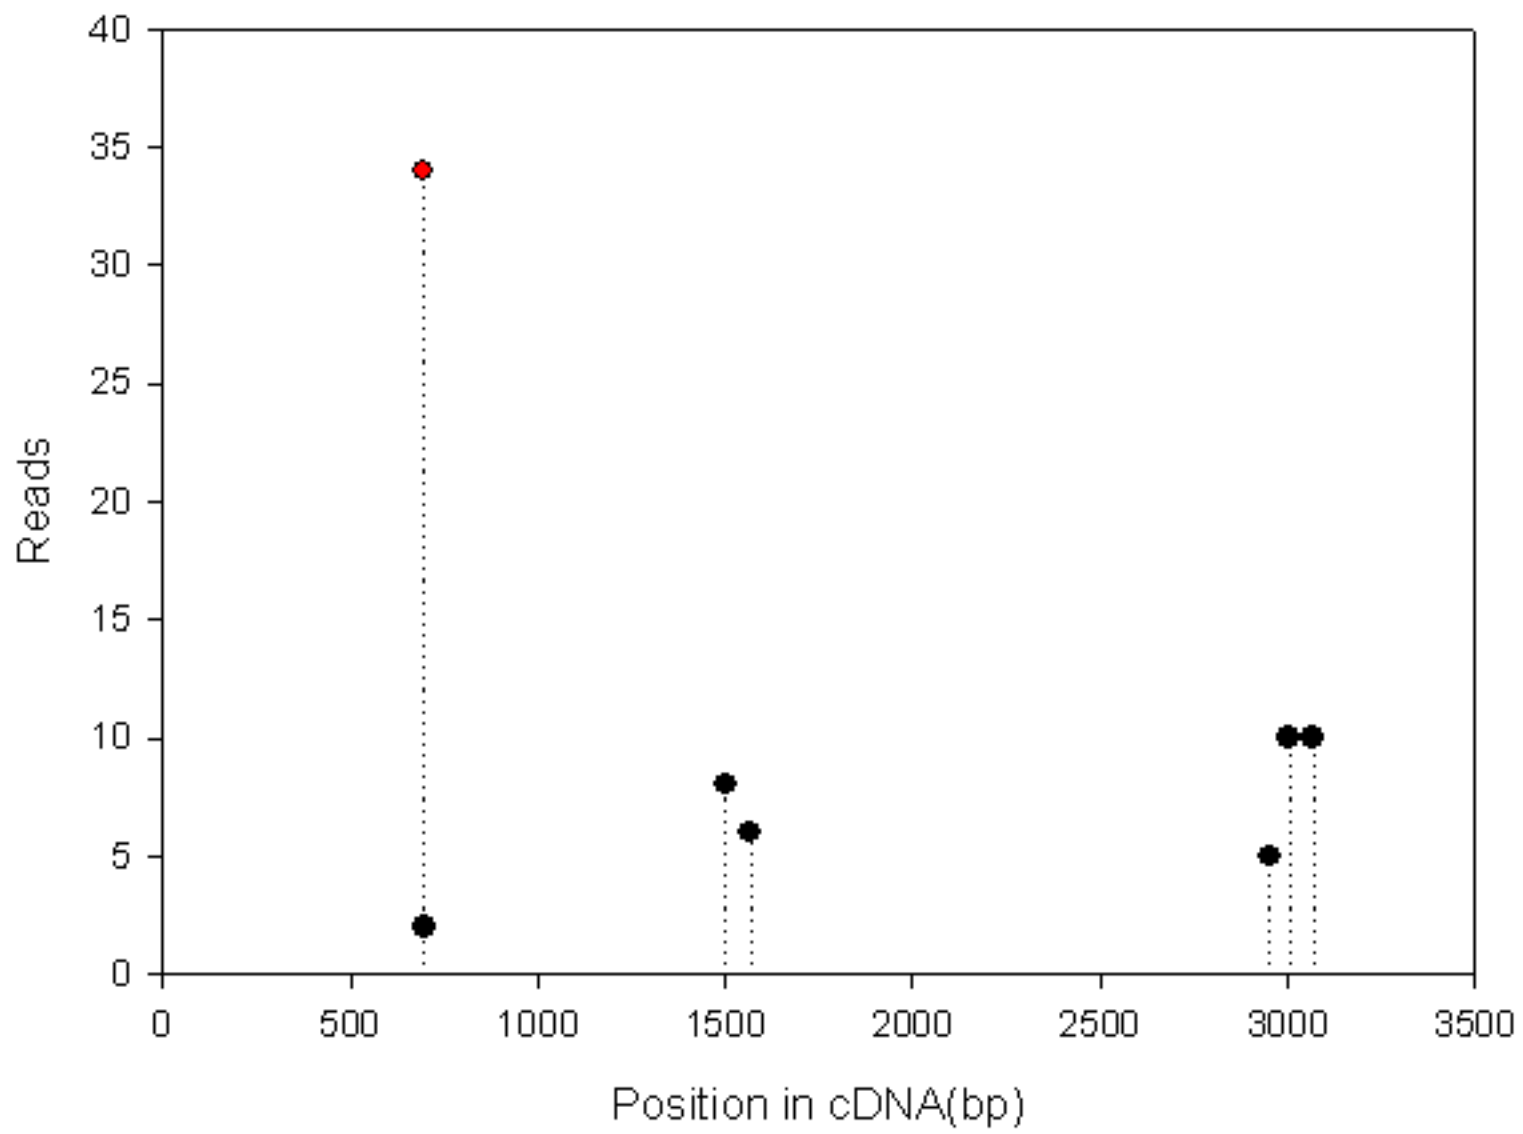

|                                   |               |
|-----------------------------------|---------------|
| 5' GGCAUUGGUGGUAAUAGGCAAGACAAC 3' | Cs2g30960.1   |
| :: :: ::::: ::::: ::              |               |
| 3' CCUUACCCACCGUAUCCAUU----- 5'   | Csi-miR2118.2 |

Csi-miR2118.2, target=Cs2g30970.1 gene=Cs2g30970  
 Category:1  
 Score=5  
 Cleavage Site=673

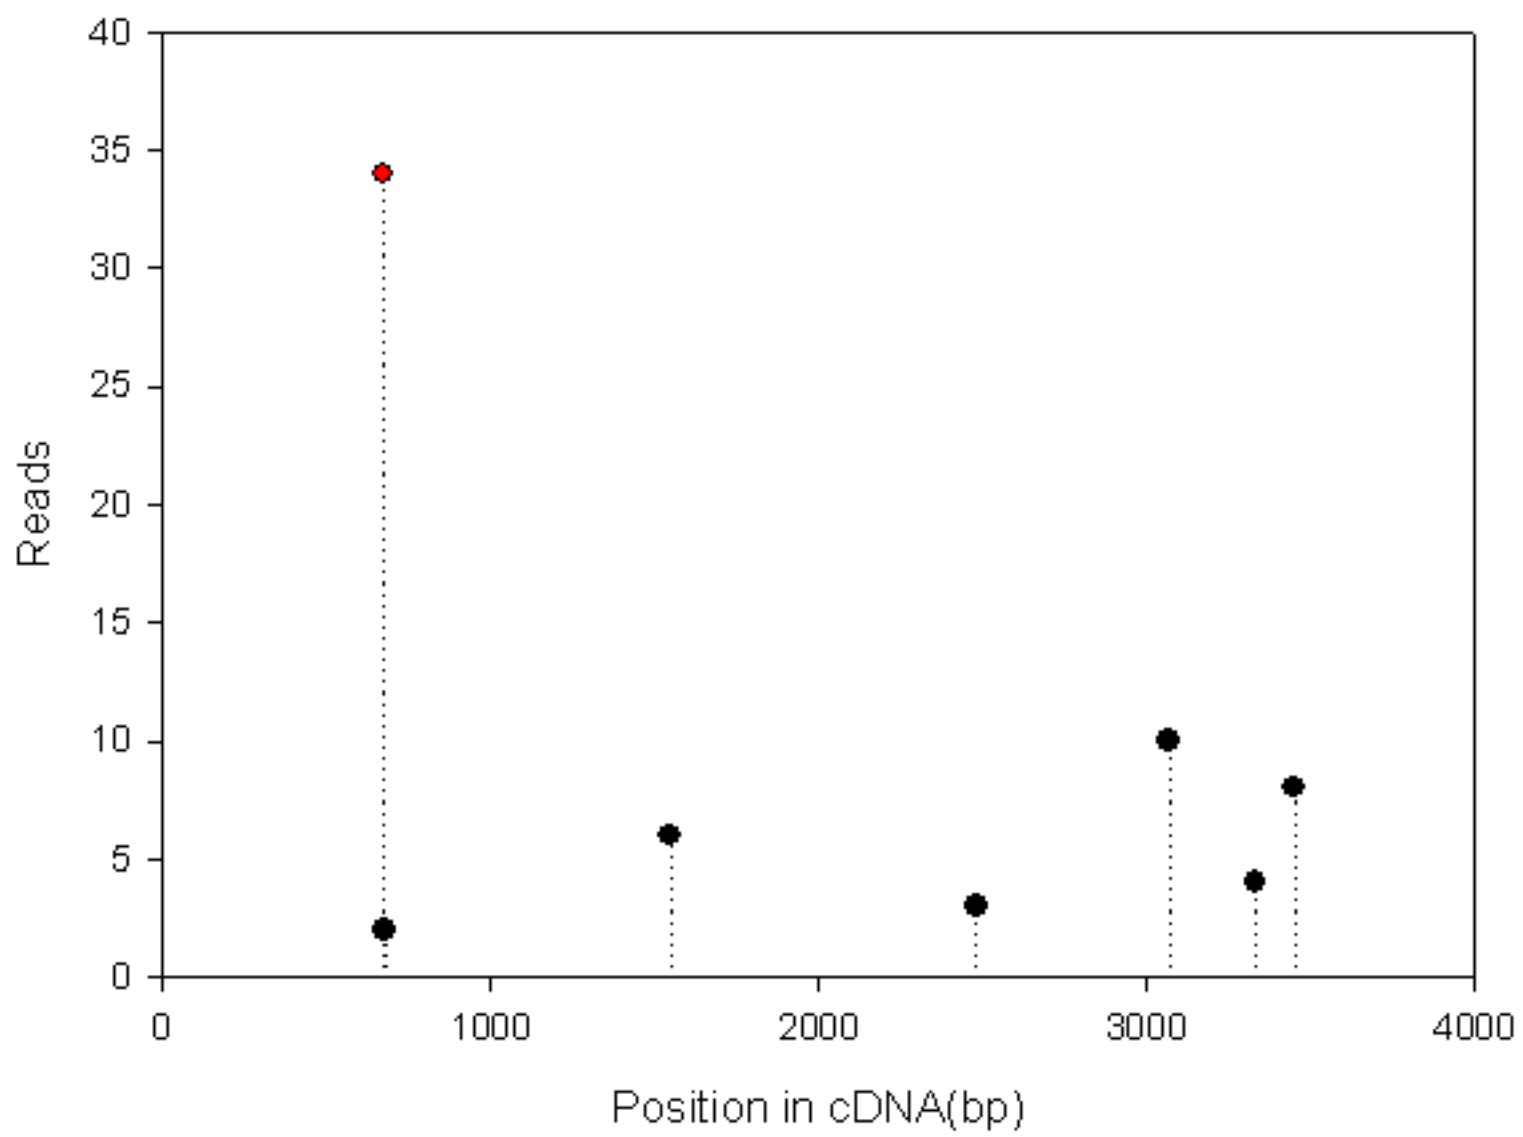

```

5' GGCAUUGGUGGUUAUAGGCAAGACAAC 3'      Cs2g30970.1
   :: :: :::::::::::::: ::
3' CCUUACCCACCGUAUCCAUU----- 5'      Csi-miR2118.2
  
```

Csi-miR2118.2, target=Cs3g12720.1 gene=Cs3g12720  
 Category:1  
 Score=5  
 Cleavage Site=547

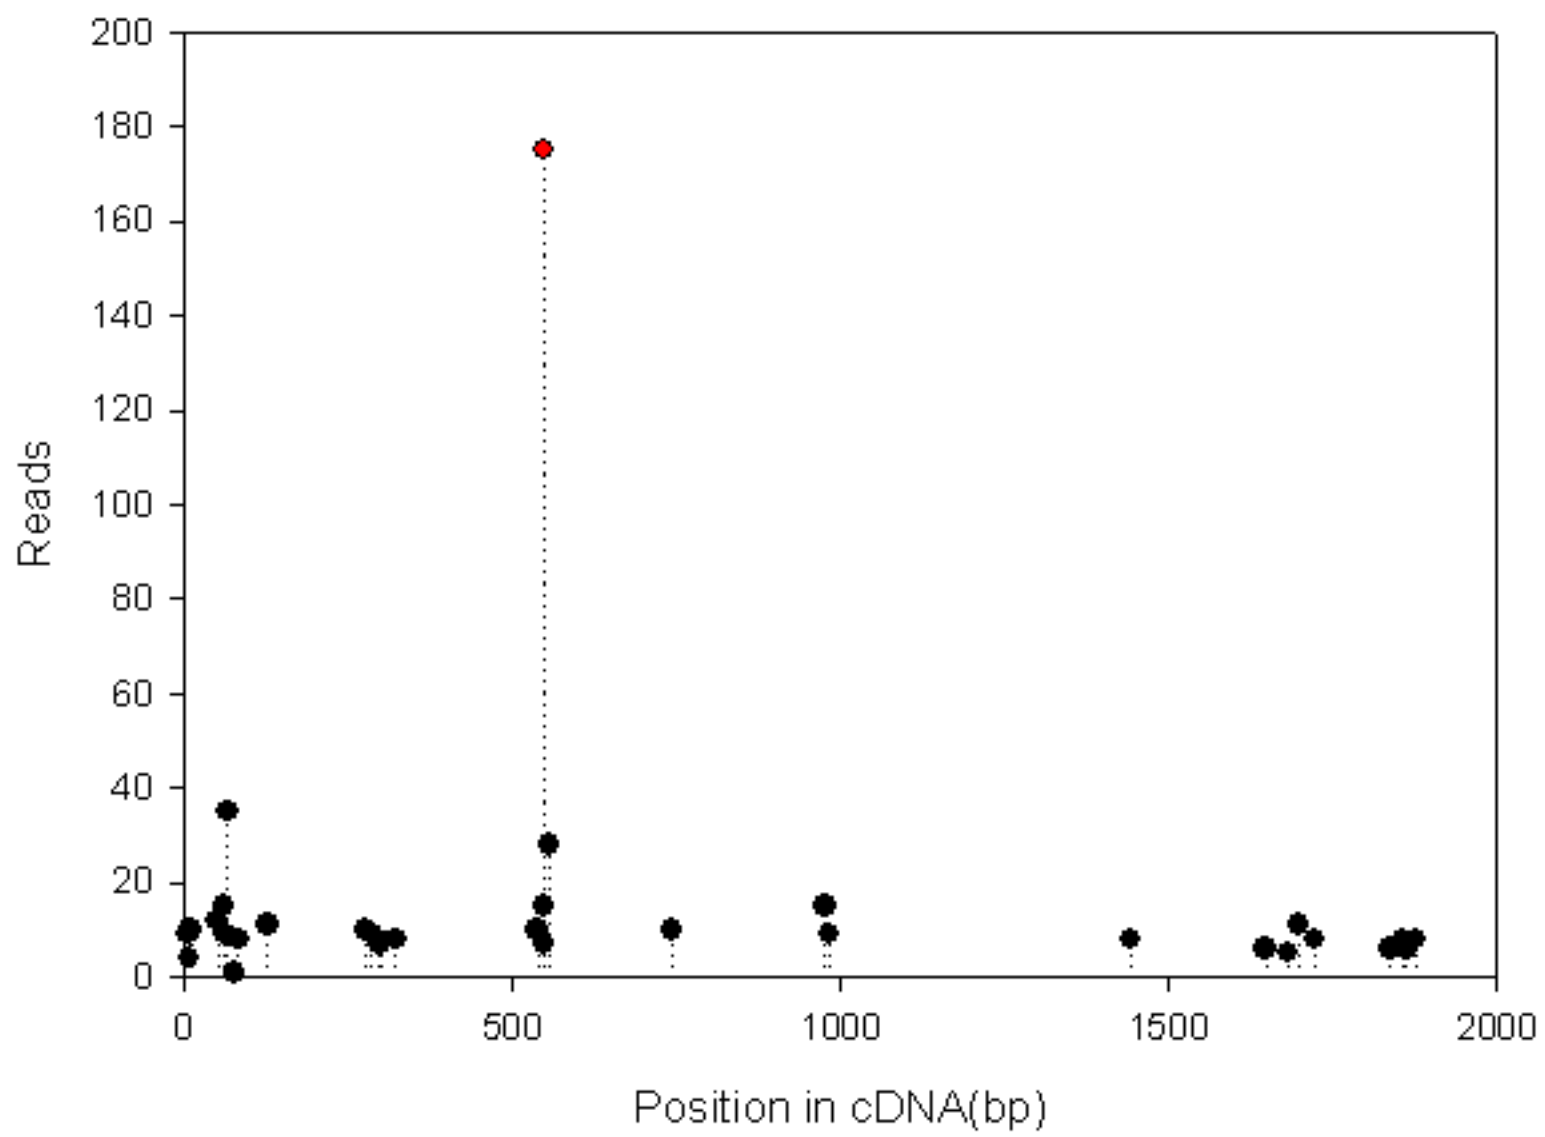

```

5' GGCAUGGGUGGCAUUGGAAAGACAAC 3'      Cs3g12720.1
   :: :::::::::::::: :: ::
3' CCUUACCCACCGUAUCCAUU----- 5'      Csi-miR2118.2

```

Csi-miR2118.2, target=Cs3g12760.1 gene=Cs3g12760  
 Category:1  
 Score=4.5  
 Cleavage Site=1037

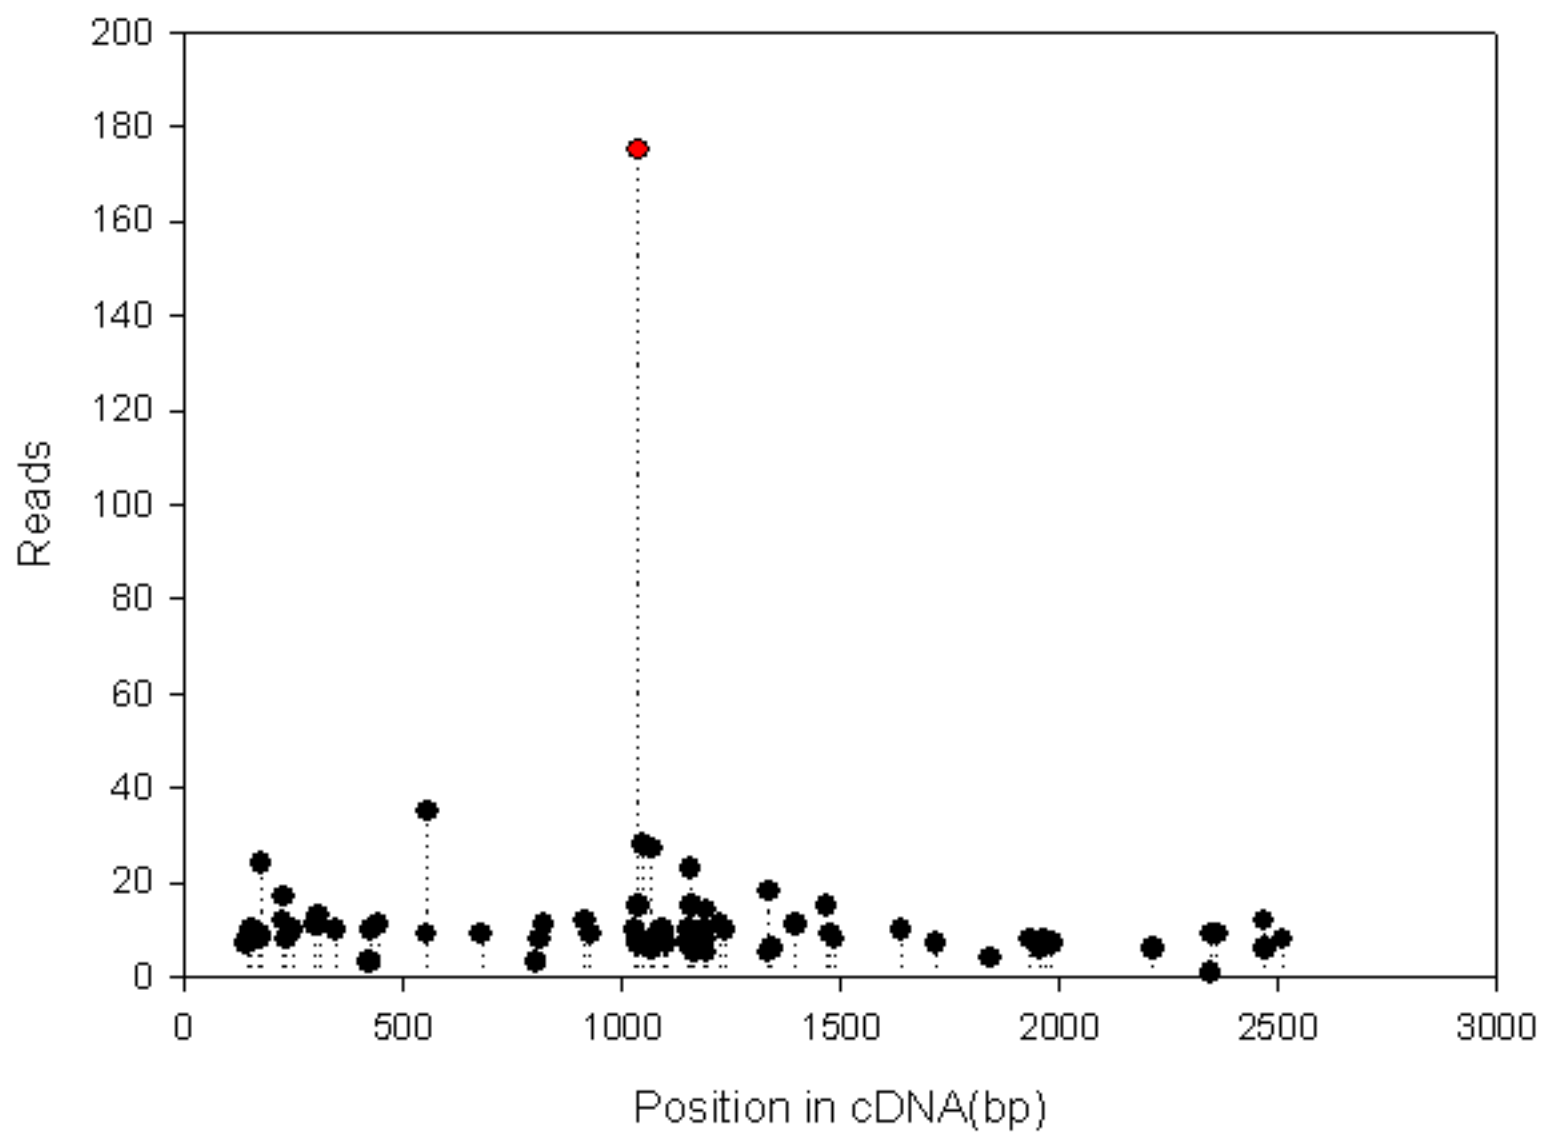

```

5' GGAUGGGUGGCAUUGGAAAGACAAC 3'      Cs3g12760.1
   ::::::::::::::: :: ::
3' CCUACCCACCGUAUCCAU----- 5'      Csi-miR2118.2

```



Csi-miR2118.2, target=Cs3g12850.1 gene=Cs3g12850  
 Category:1  
 Score=4.5  
 Cleavage Site=547

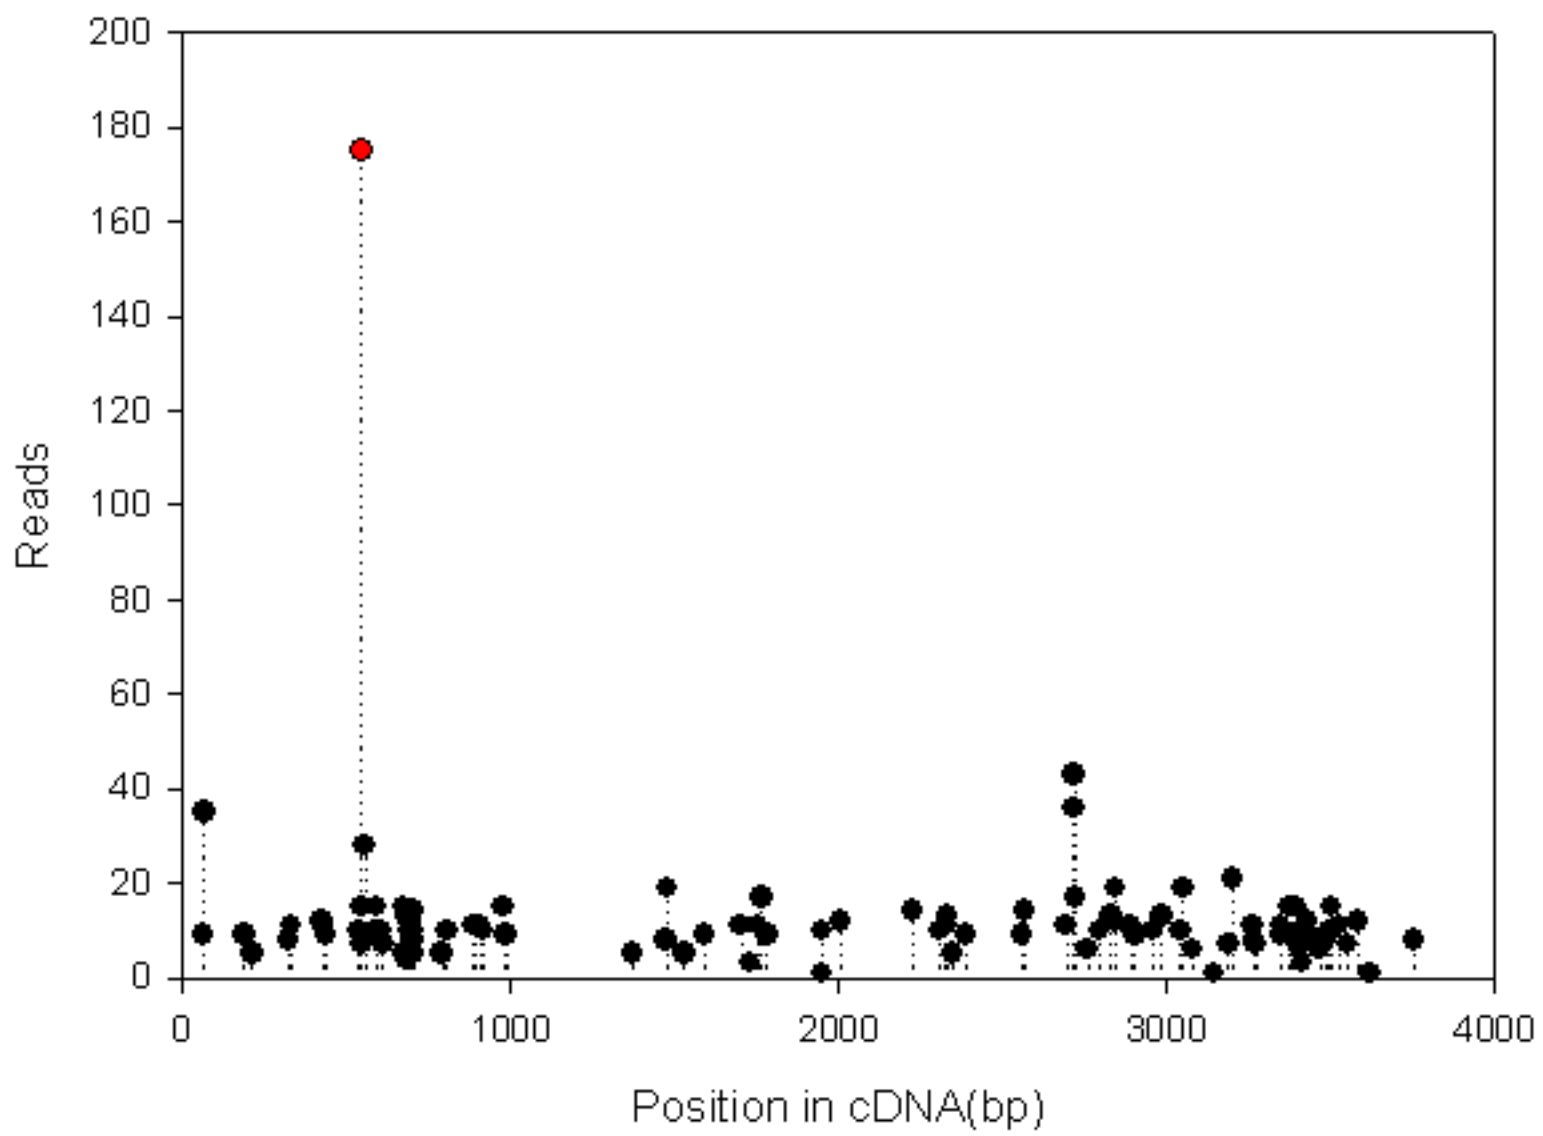

```

5' GGGAU GGGUGGCAUUGGAAAGACAAC 3'      Cs3g12850.1
   ::::::::::::::: :: ::
3' CCUUACCCACCGUAUCCAUU----- 5'      Csi-miR2118.2
  
```

Csi-miR2118.2, target=Cs5g18480.1 gene=Cs5g18480  
 Category:1  
 Score=4  
 Cleavage Site=700

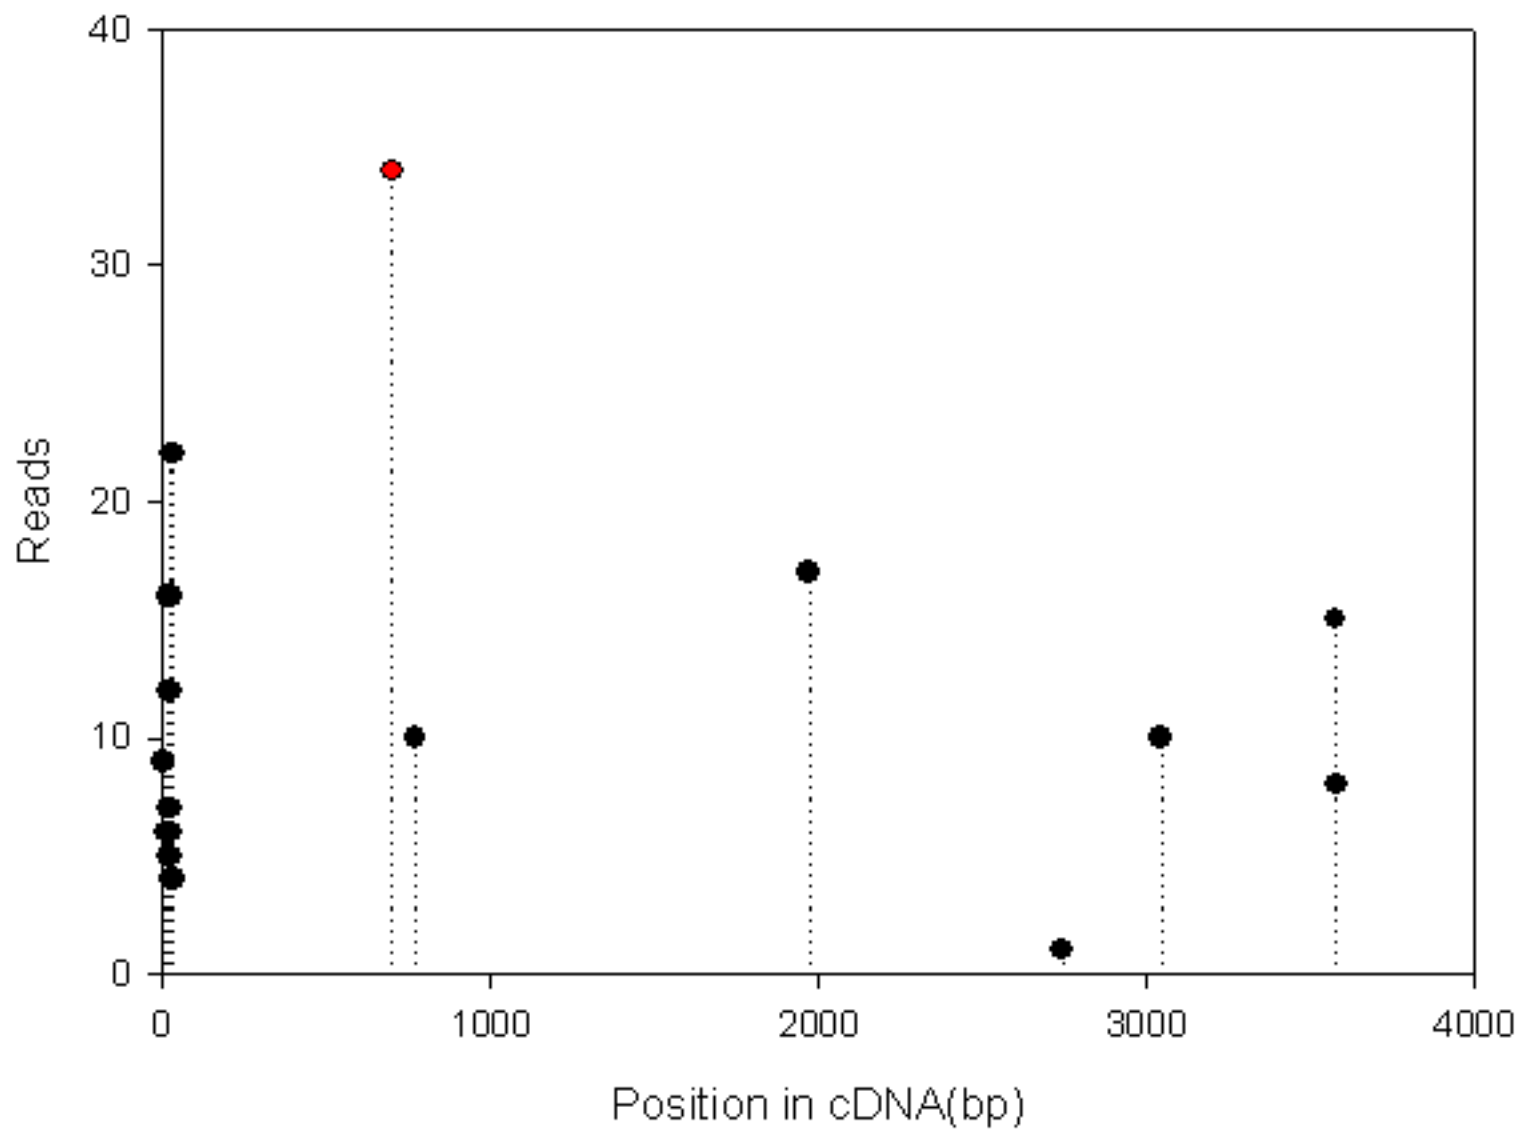

```

5' GGCAUGGGUGGUUAUAGGCAAGACAAC 3'      Cs5g18480.1
   :: :::::::::::::::::::: ::
3' CCUACCCACCGUAUCCAUU----- 5'      Csi-miR2118.2
  
```

Csi-miR2118.2, target=Cs5g19310.1 gene=Cs5g19310  
 Category:1  
 Score=5  
 Cleavage Site=859

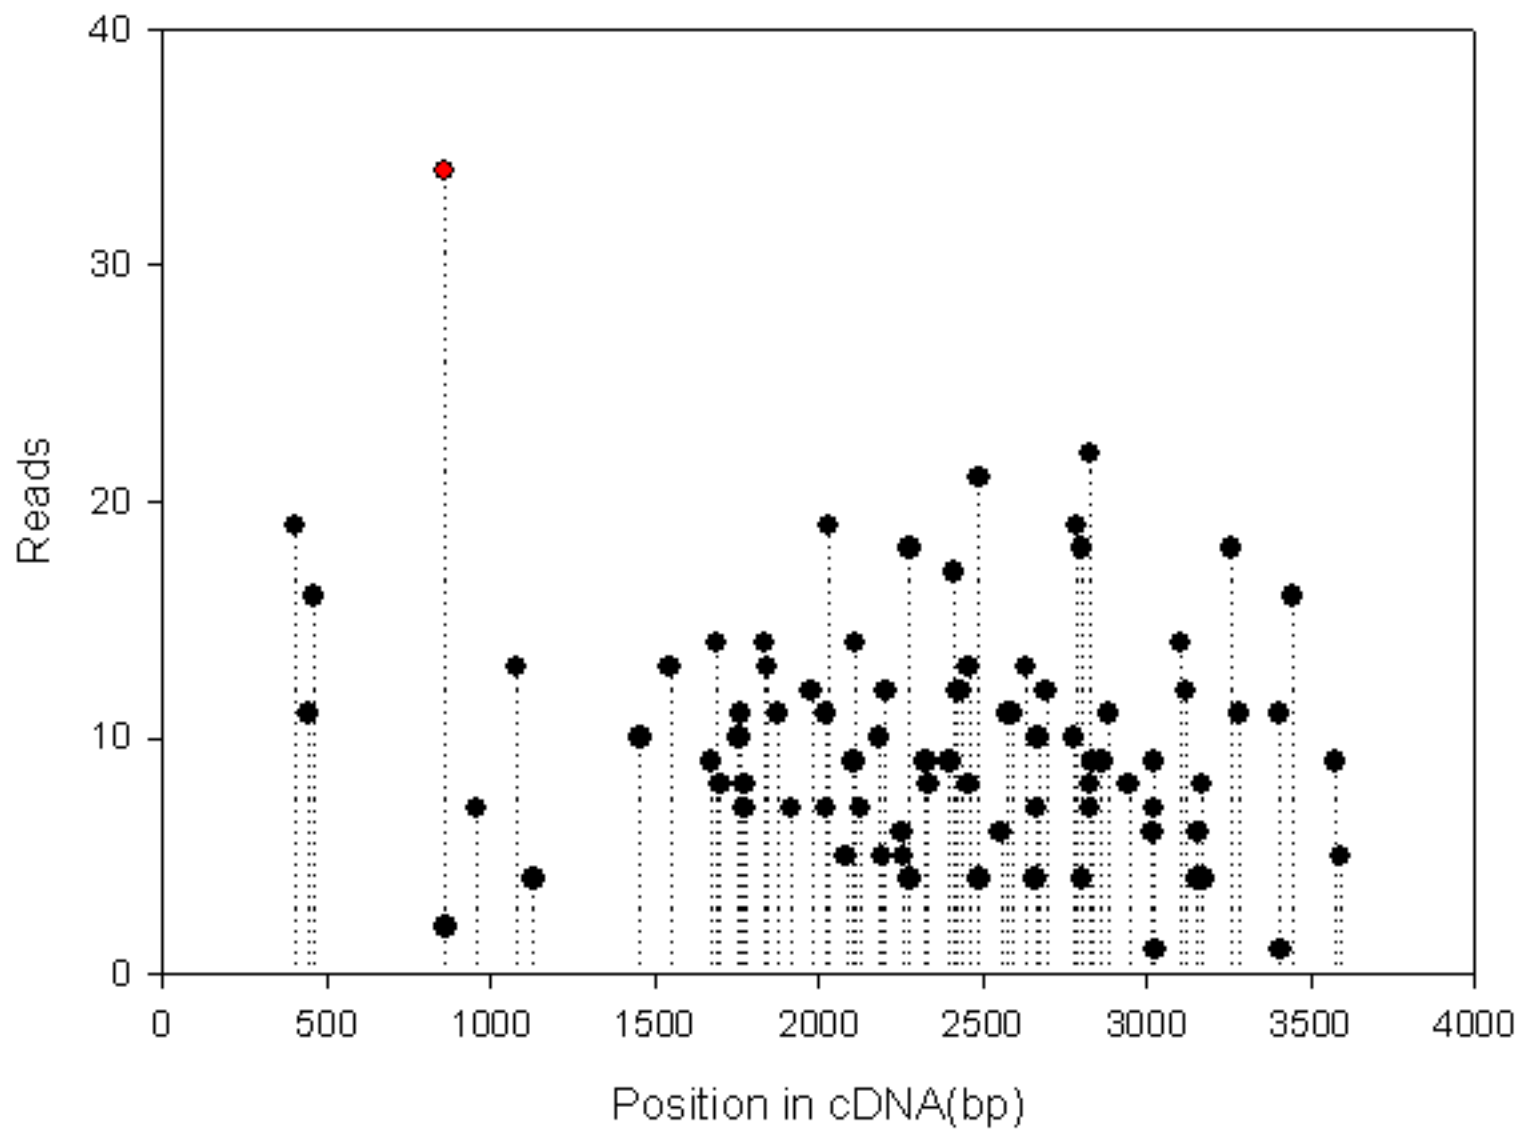

```

5' GGCAUCGGUGGUAUAGGCAAGACAAC 3'      Cs5g19310.1
  :: :: ::::: ::::: ::
3' CCUACCCACCGUAUCCAU----- 5'      Csi-miR2118.2
  
```

Csi-miR2118.2, target=Cs5g19850.1 gene=Cs5g19850  
 Category:1  
 Score=5  
 Cleavage Site=646

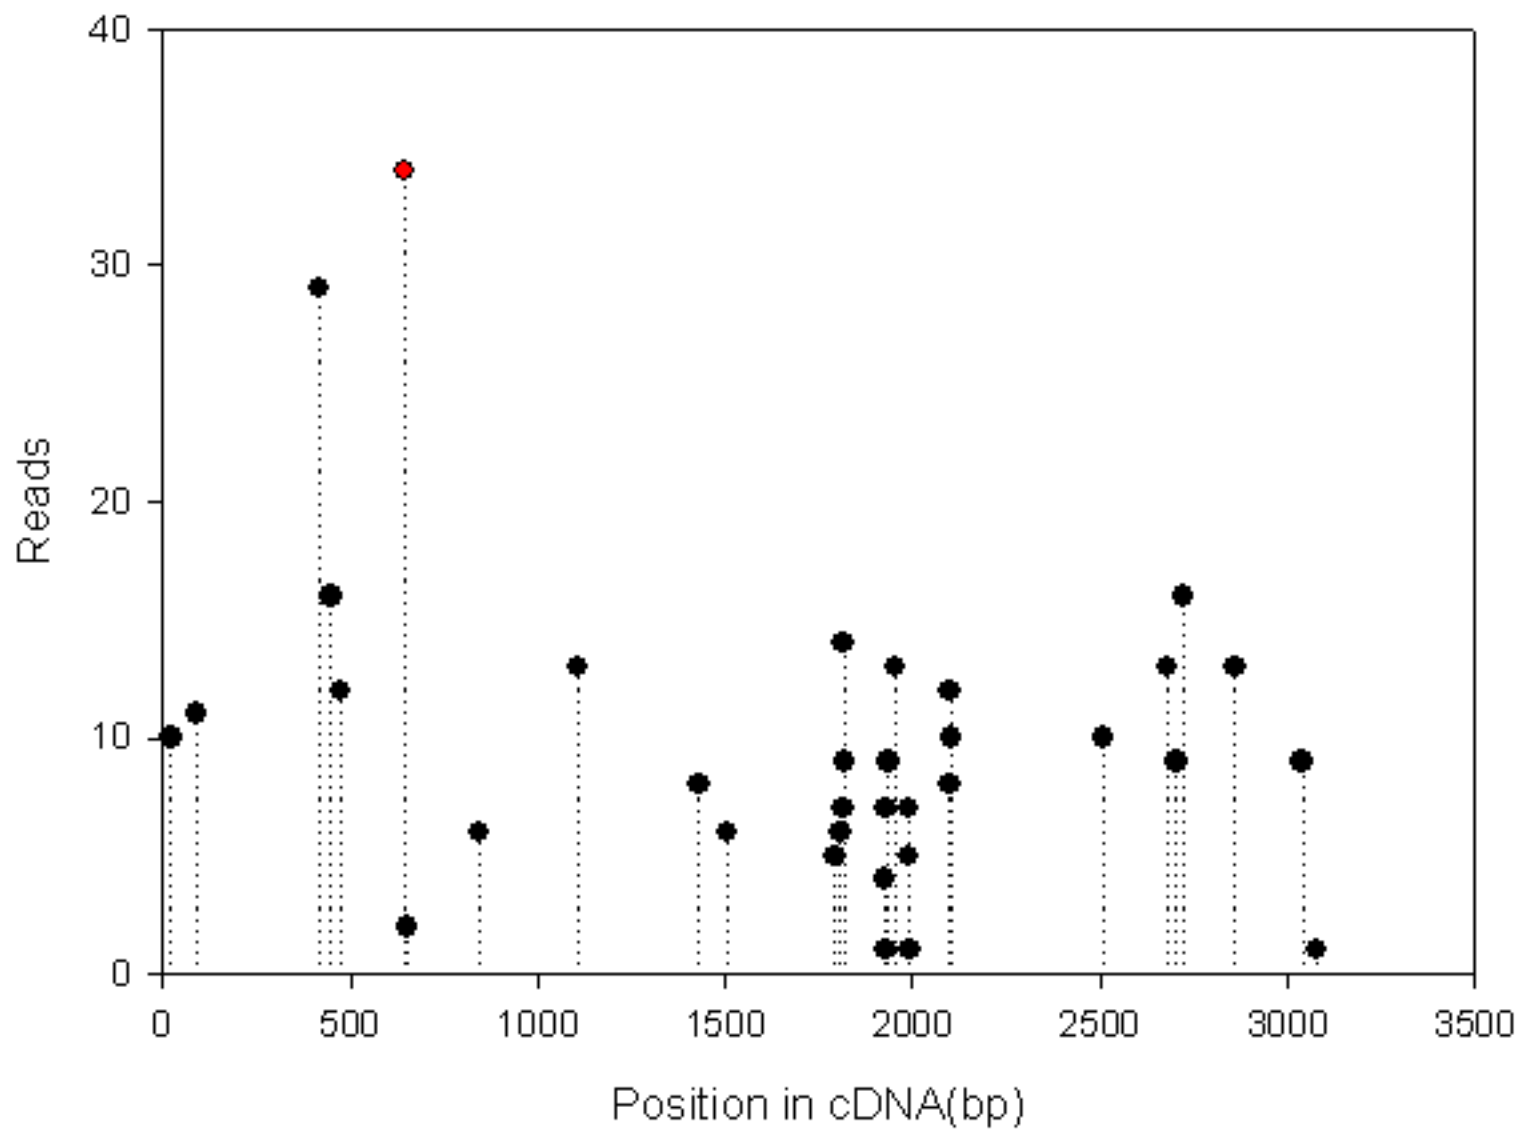

```

5' GGCAUUGGUGGUUAUAGGCAAGACAAC 3'      Cs5g19850.1
   :: :: :::::::::::::: ::
3' CCUACCCACCGUAUCCAUU----- 5'      Csi-miR2118.2

```

Csi-miR2118.2, target=Cs5g19920.1 gene=Cs5g19920  
 Category:1  
 Score=4  
 Cleavage Site=715

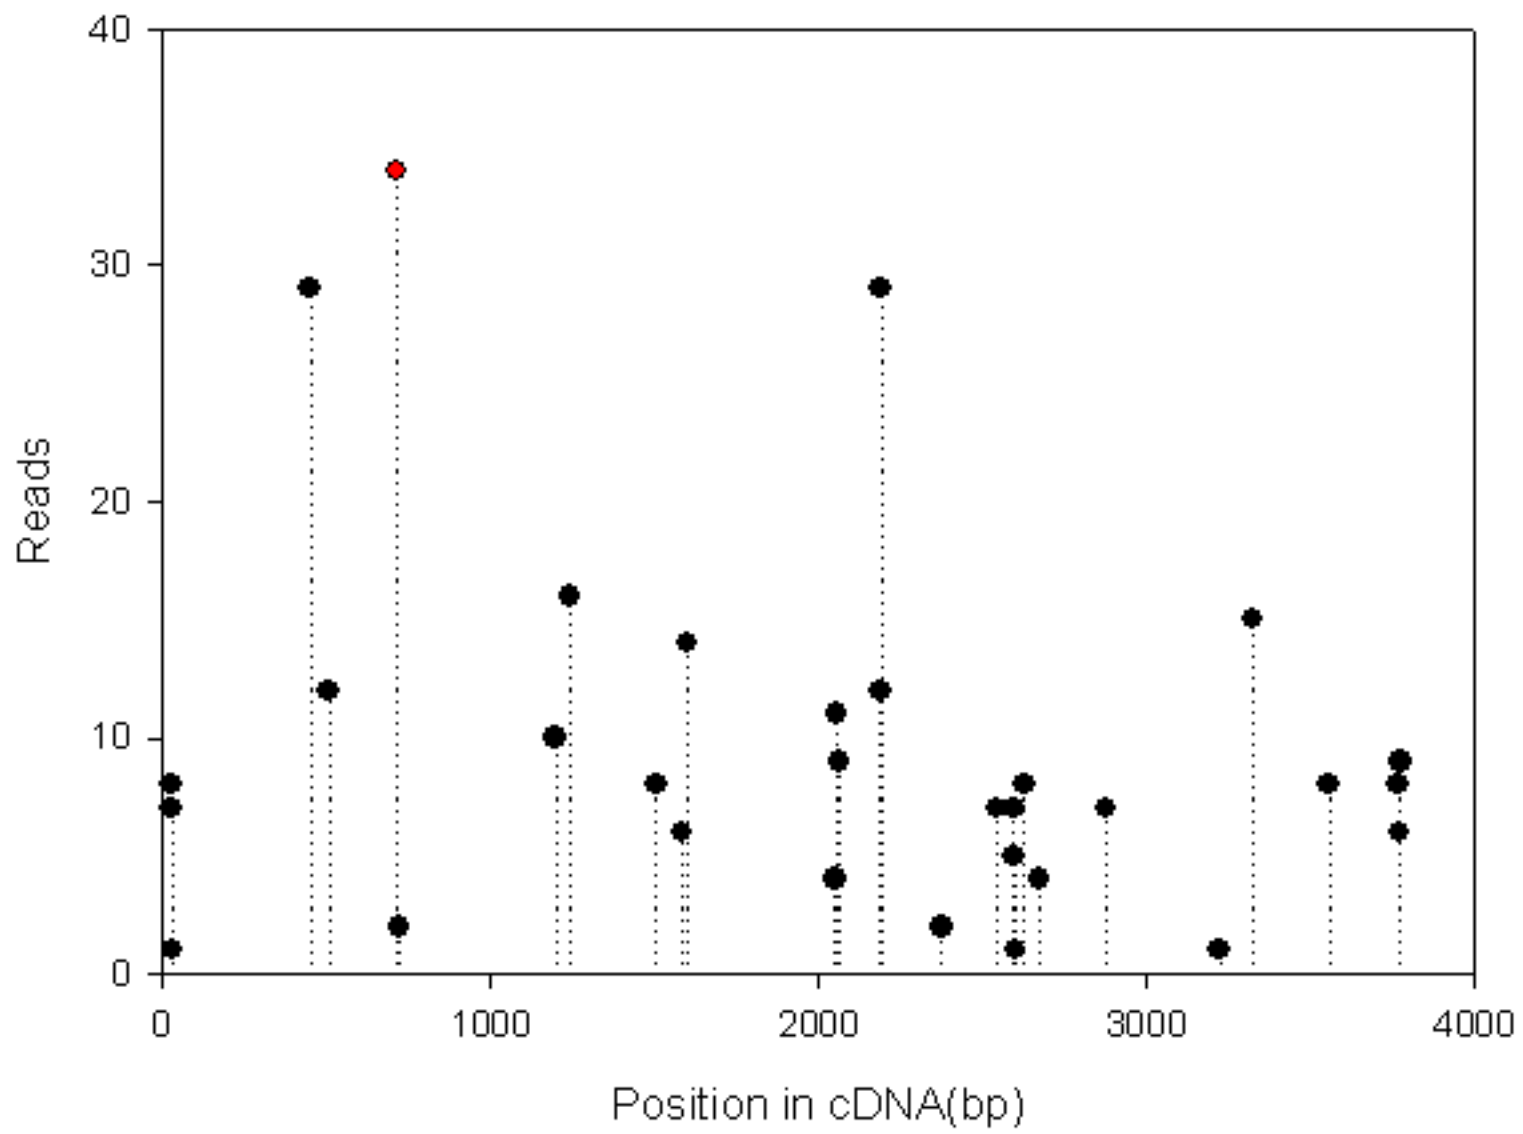

5' GGCAUGGGUGGUAUAGGCAAGACAAC 3'  
 :: :::::::::::::::::::: ::  
 3' CCUUACCCACCGUAUCCAUU----- 5'

Cs5g19920.1

Csi-miR2118.2

Csi-miR2118.2, target=Cs8g10560.1 gene=Cs8g10560  
 Category:2  
 Score=5  
 Cleavage Site=652

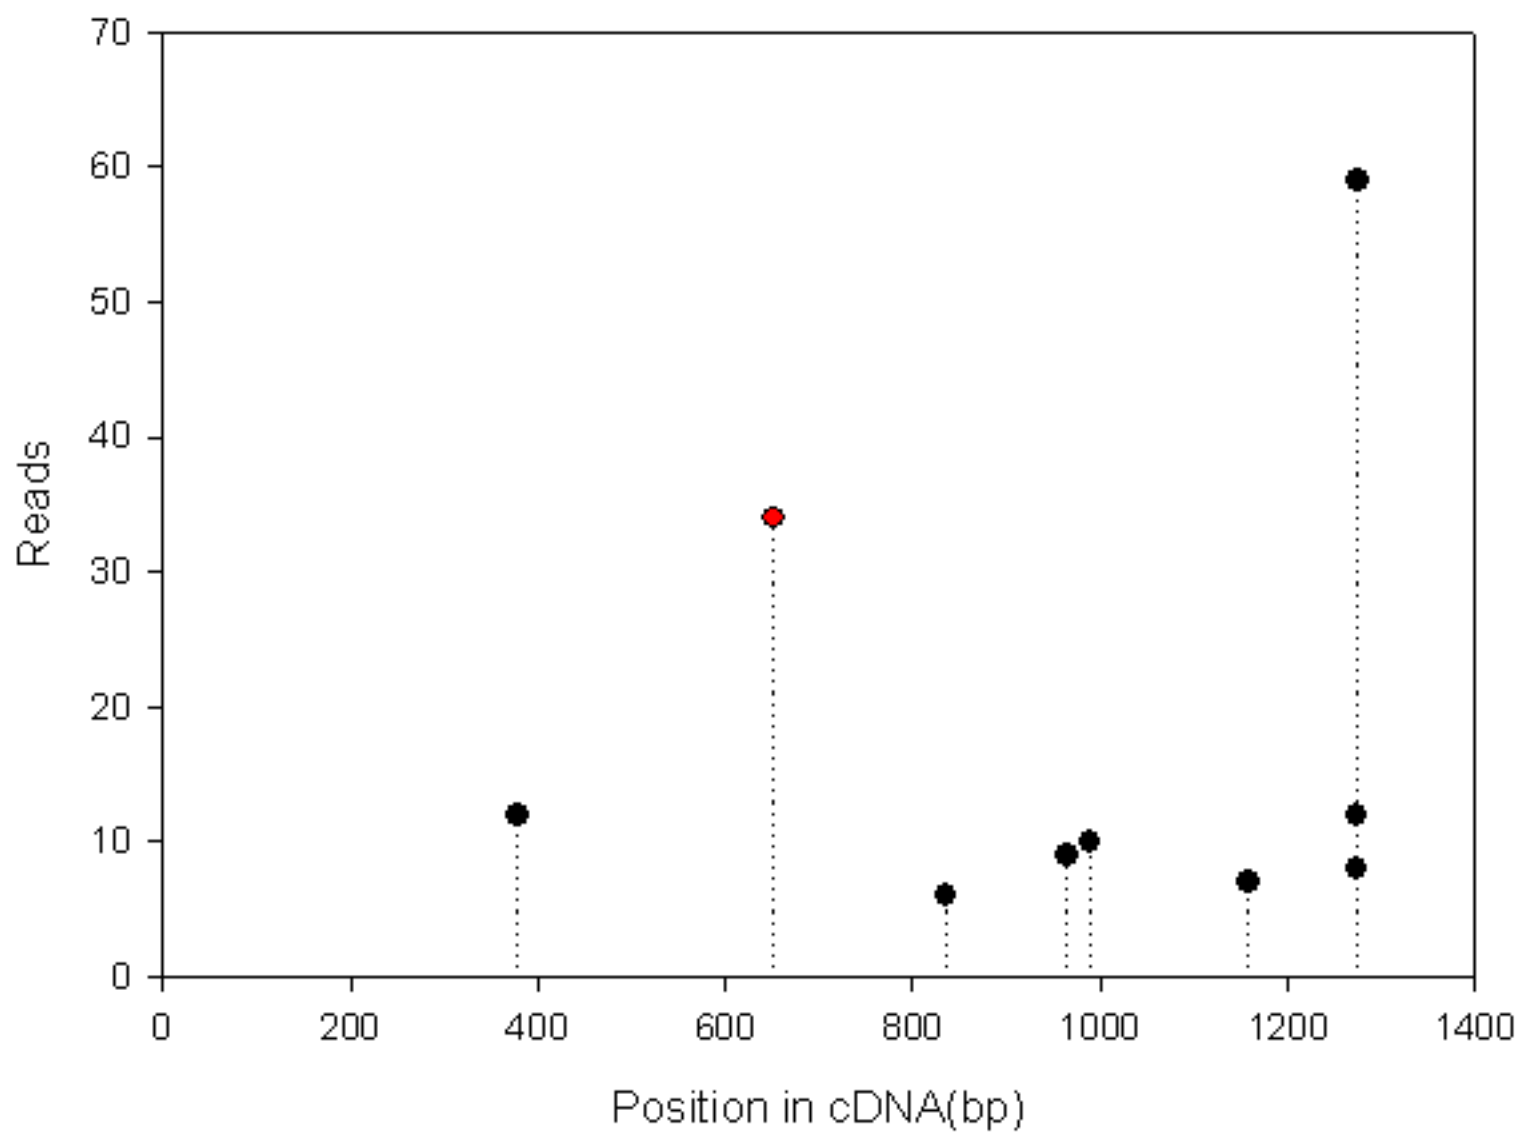

```

5' GGCAUCGGUGGUAUAGGCAAGACAAC 3'      Cs8g10560.1
   :: :: :::::::::::::: ::
3' CCUACCCACCGUAUCCAUU----- 5'      Csi-miR2118.2

```

Csi-miR2118.2, target=Orange1.1t00149.1 gene=Orange1.1t00149  
 Category:2  
 Score=3.5  
 Cleavage Site=98

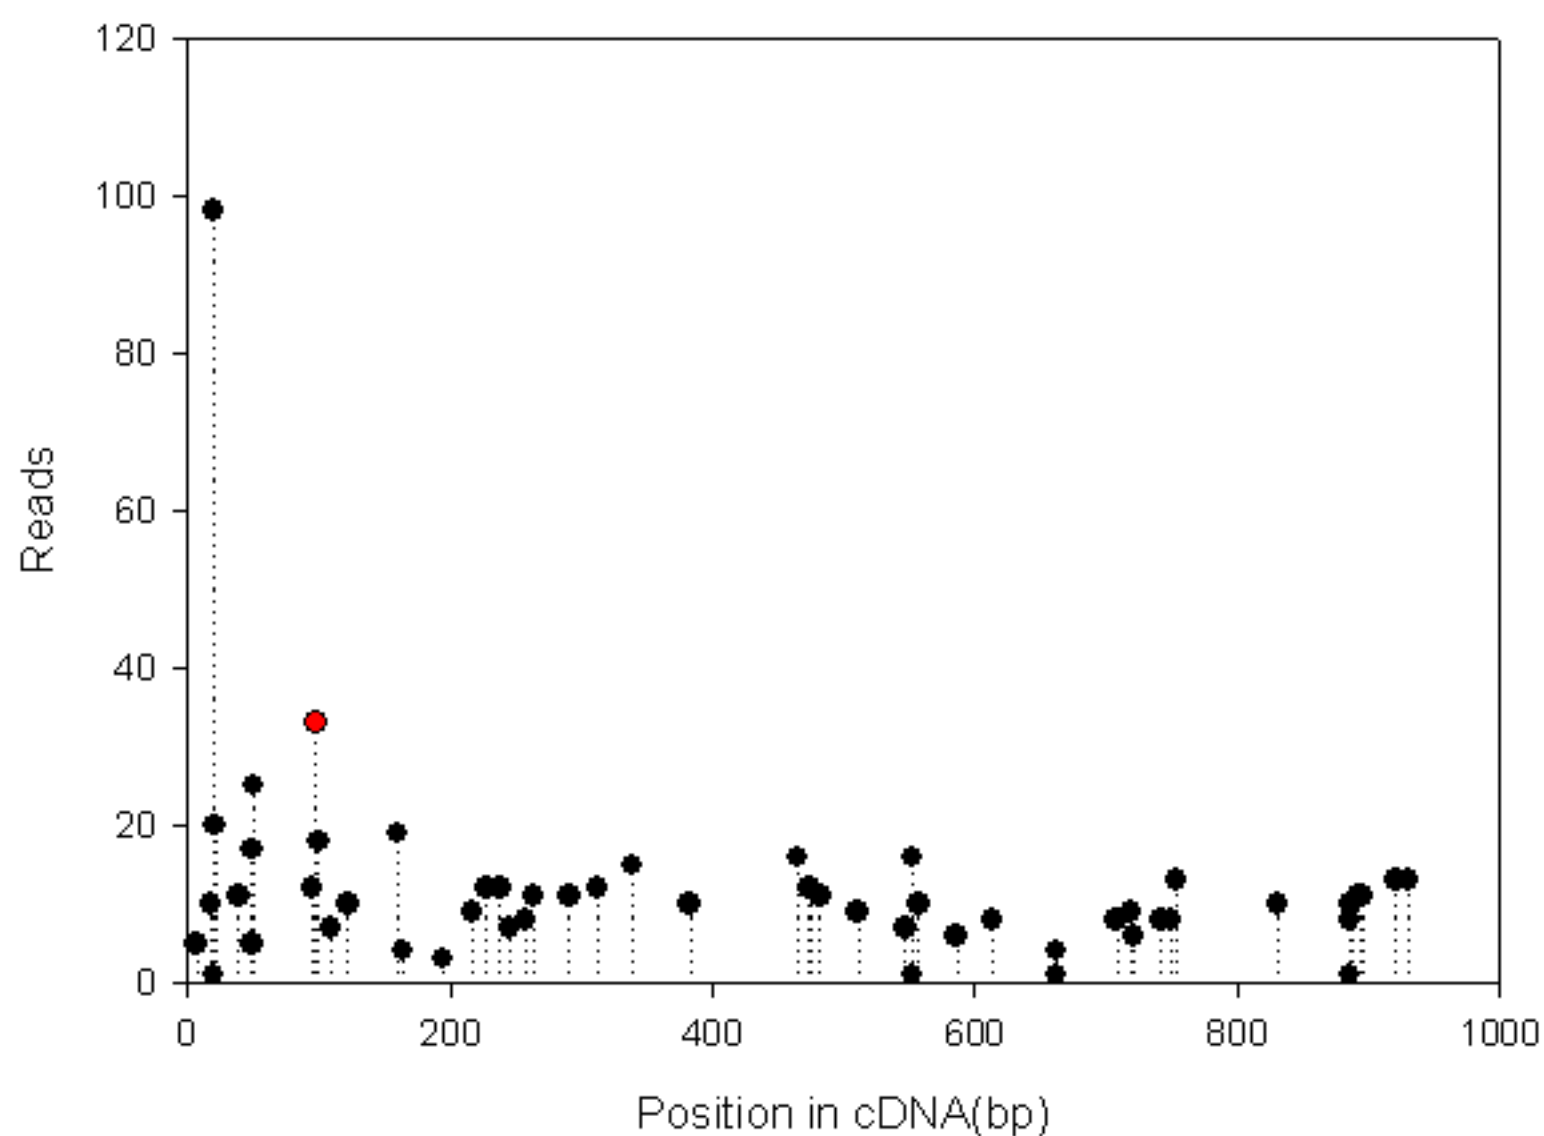

```

5' ACGGAGUGGGUGGCAUA-GUGAUGGCC 3' Orange1.1t00149.1
   : : : : : : : : : : : : : : : : : :
3' --CCUUACCCACCGUAUCCAUU----- 5' Csi-miR2118.2
  
```

Csi-miR2118.2, target=Orange1.1t00557.1 gene=Orange1.1t00557  
 Category:1  
 Score=4  
 Cleavage Site=131

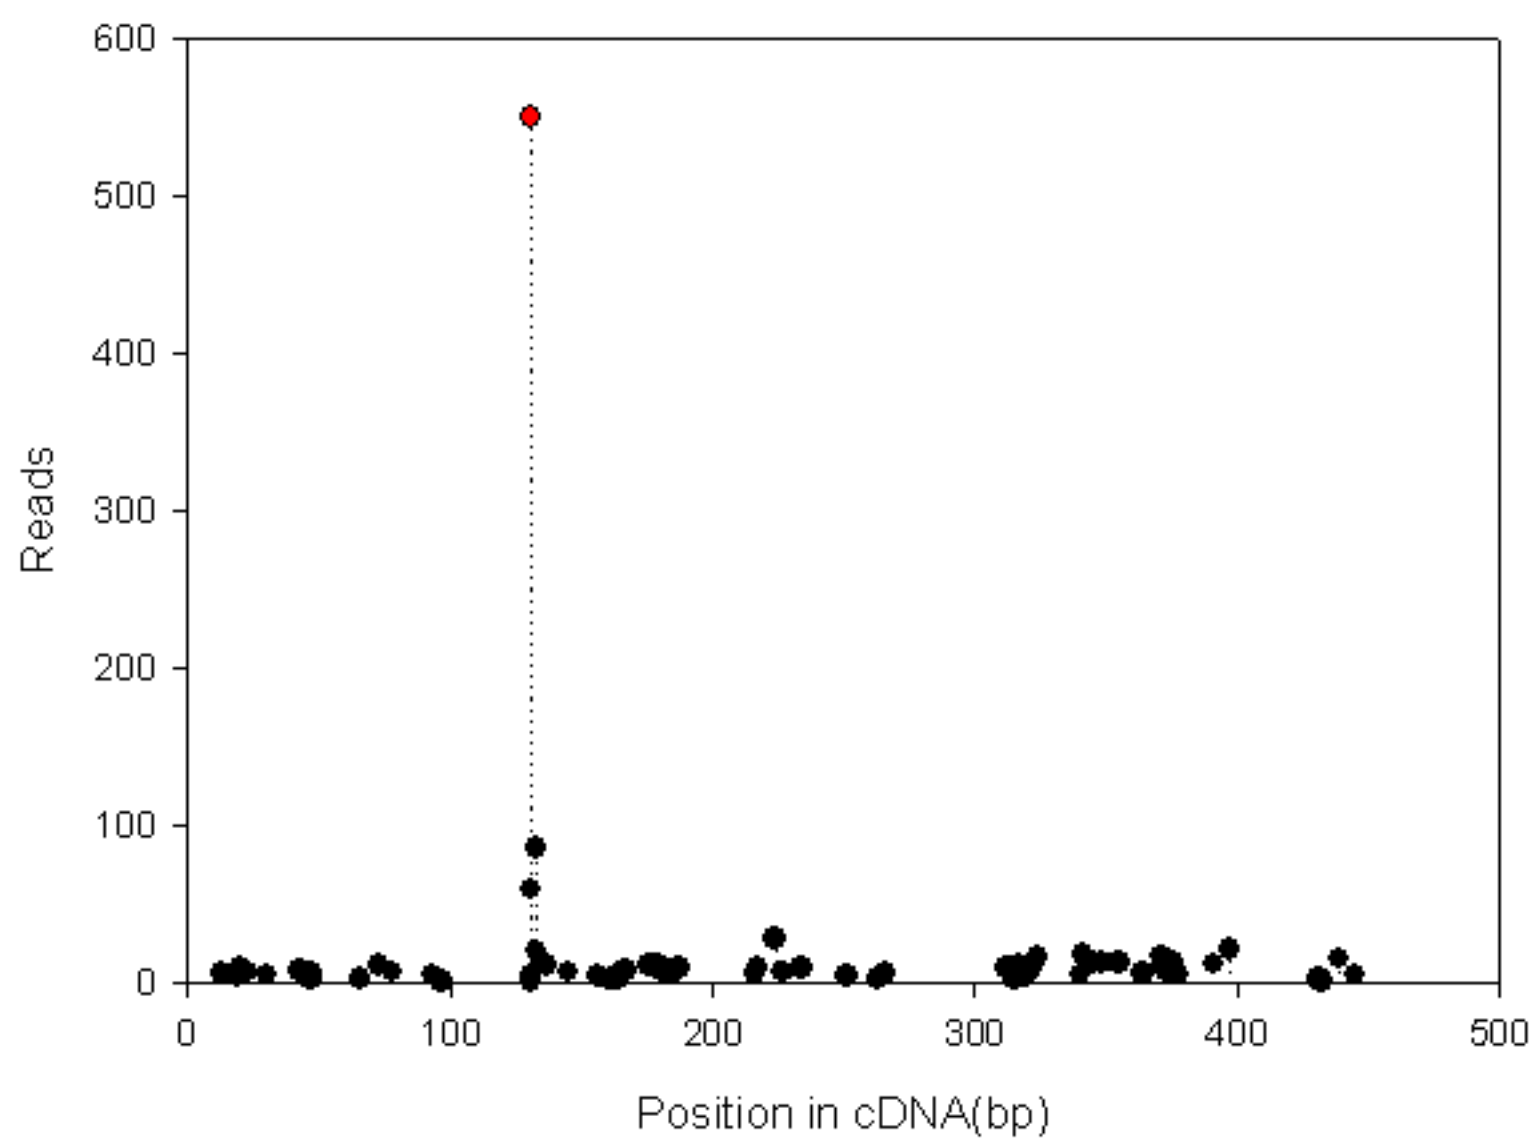

|                                  |                   |
|----------------------------------|-------------------|
| 5' AAGACAUGGGUGGCAUAGGUCACAUC 3' | Orange1.1t00557.1 |
| :: :::::::::::::::::::: :        |                   |
| 3' -CCU-UACCCACCGUAUCCAUU---- 5' | Csi-miR2118.2     |



Csi-miR2118.2, target=Orange1.1t02171.1 gene=Orange1.1t02171  
 Category:3  
 Score=4  
 Cleavage Site=662

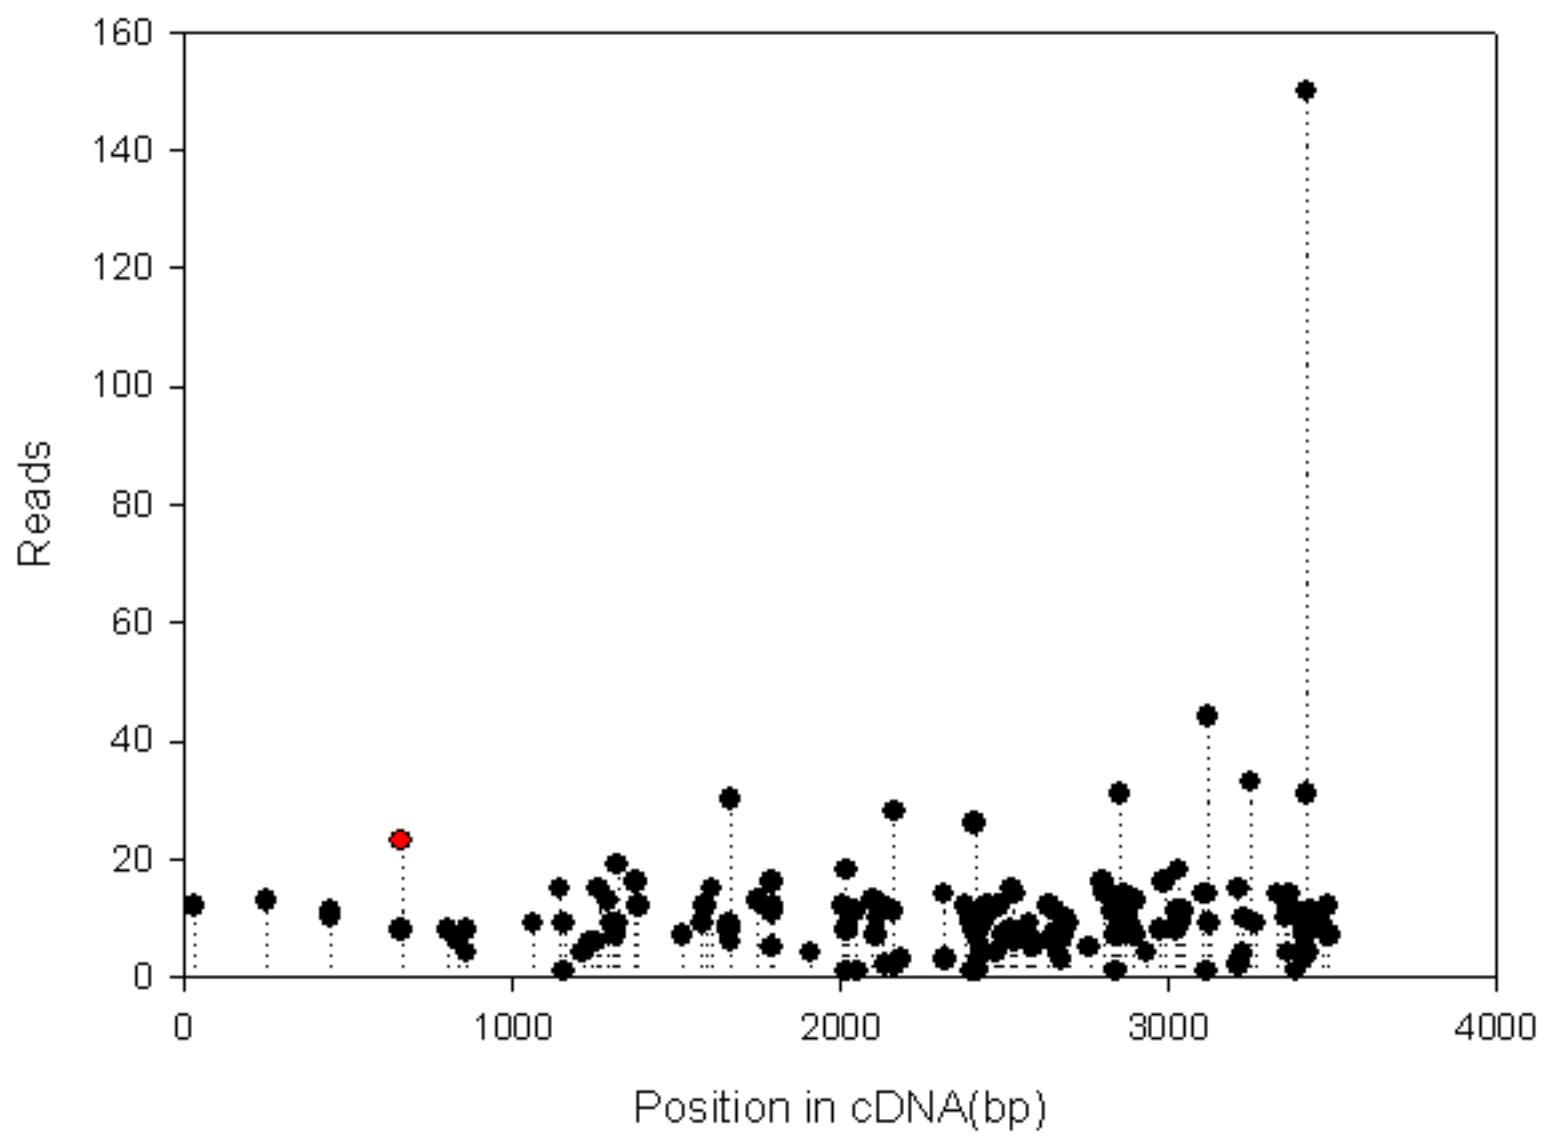

```

5' GGGGCAUGGGUGGUUAUAGGCAAACC 3'      Orange1.1t02171.1
   :: :::::::::::::::::::: ::
3' --CCUUACCCACCGUAUCCAUU---- 5'      Csi-miR2118.2
  
```

Csi-miR2118.2, target=Orange1.1t02175.1 gene=Orange1.1t02175  
 Category:3  
 Score=4  
 Cleavage Site=735



```

5' GGGGCAUGGGUGGUUAUAGGCAAACC 3'      Orange1.1t02175.1
   :: :::::::::::::::::::: ::
3' --CCUUACCCACCGUAUCCAUU---- 5'      Csi-miR2118.2
  
```

Csi-miR2275d, target=Cs5g35220.1 gene=Cs5g35220  
 Category:1  
 Score=5  
 Cleavage Site=605

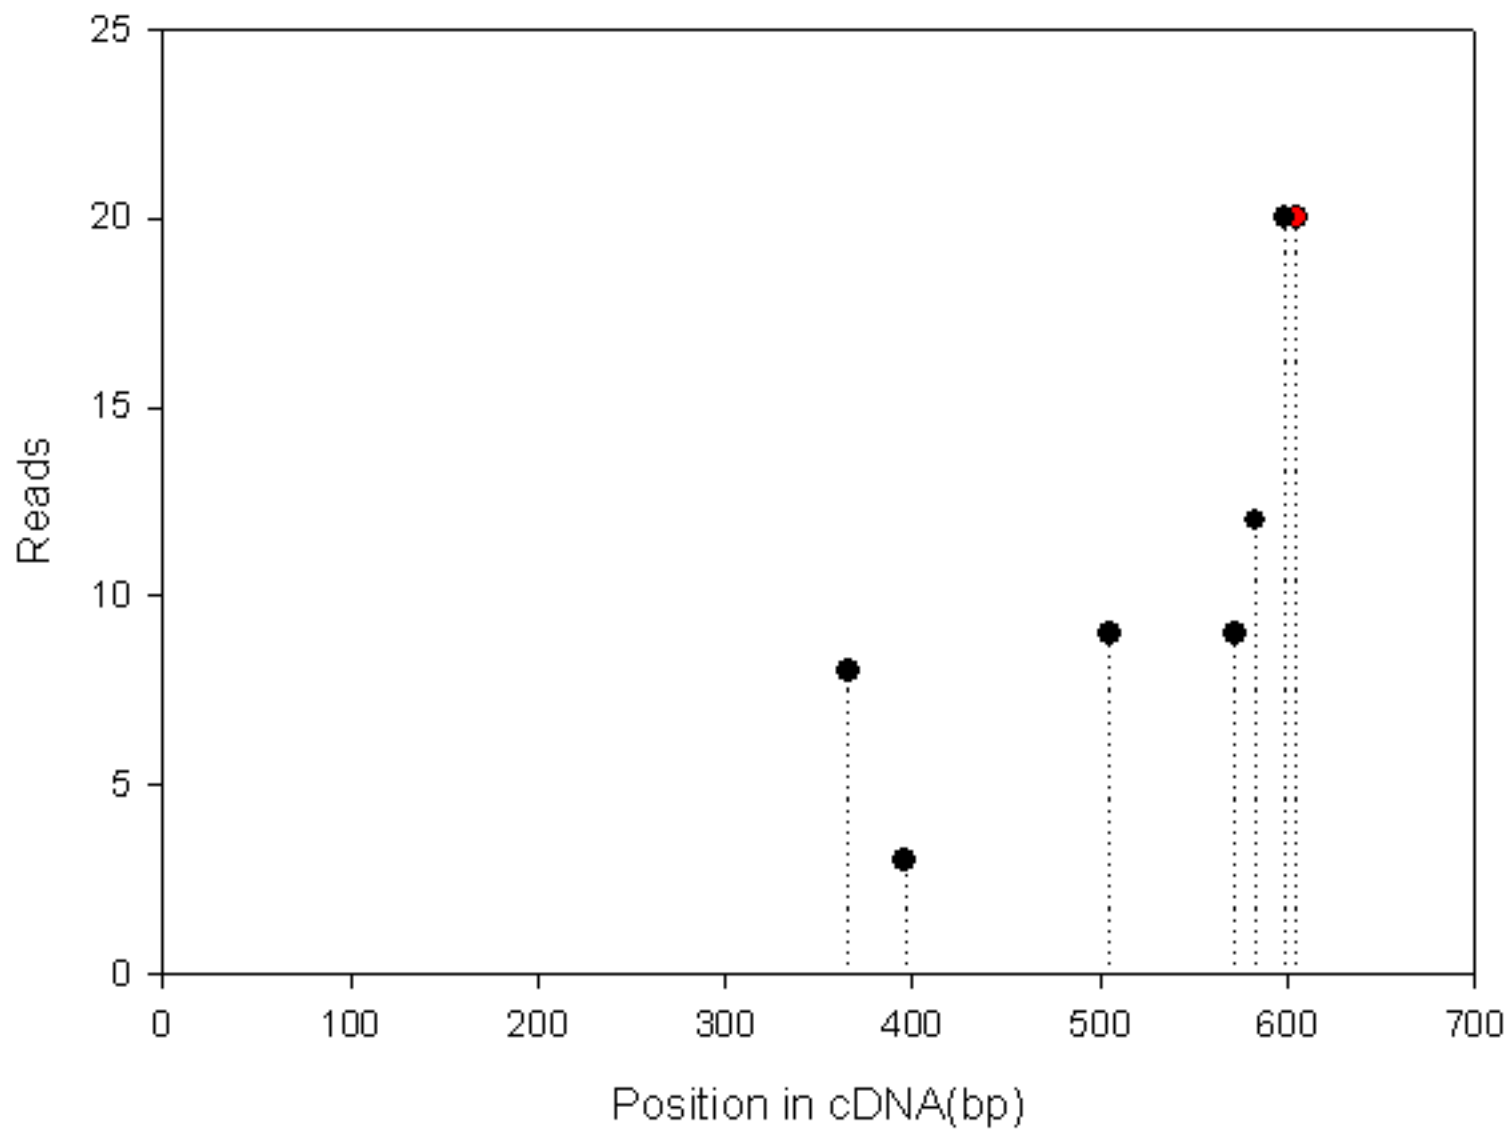

```

5' UUAAGUUU-GUCCAGCUAAUUCUGGU 3'      Cs5g35220.1
   :   :   :   :   :   :   :   :   :
3' ---ACAAUCAAGGUAGGUUAAGA--- 5'      Csi-miR2275d
  
```

Csi-miR2275d, target=Cs8g03105.1 gene=Cs8g03105  
 Category:1  
 Score=5  
 Cleavage Site=297

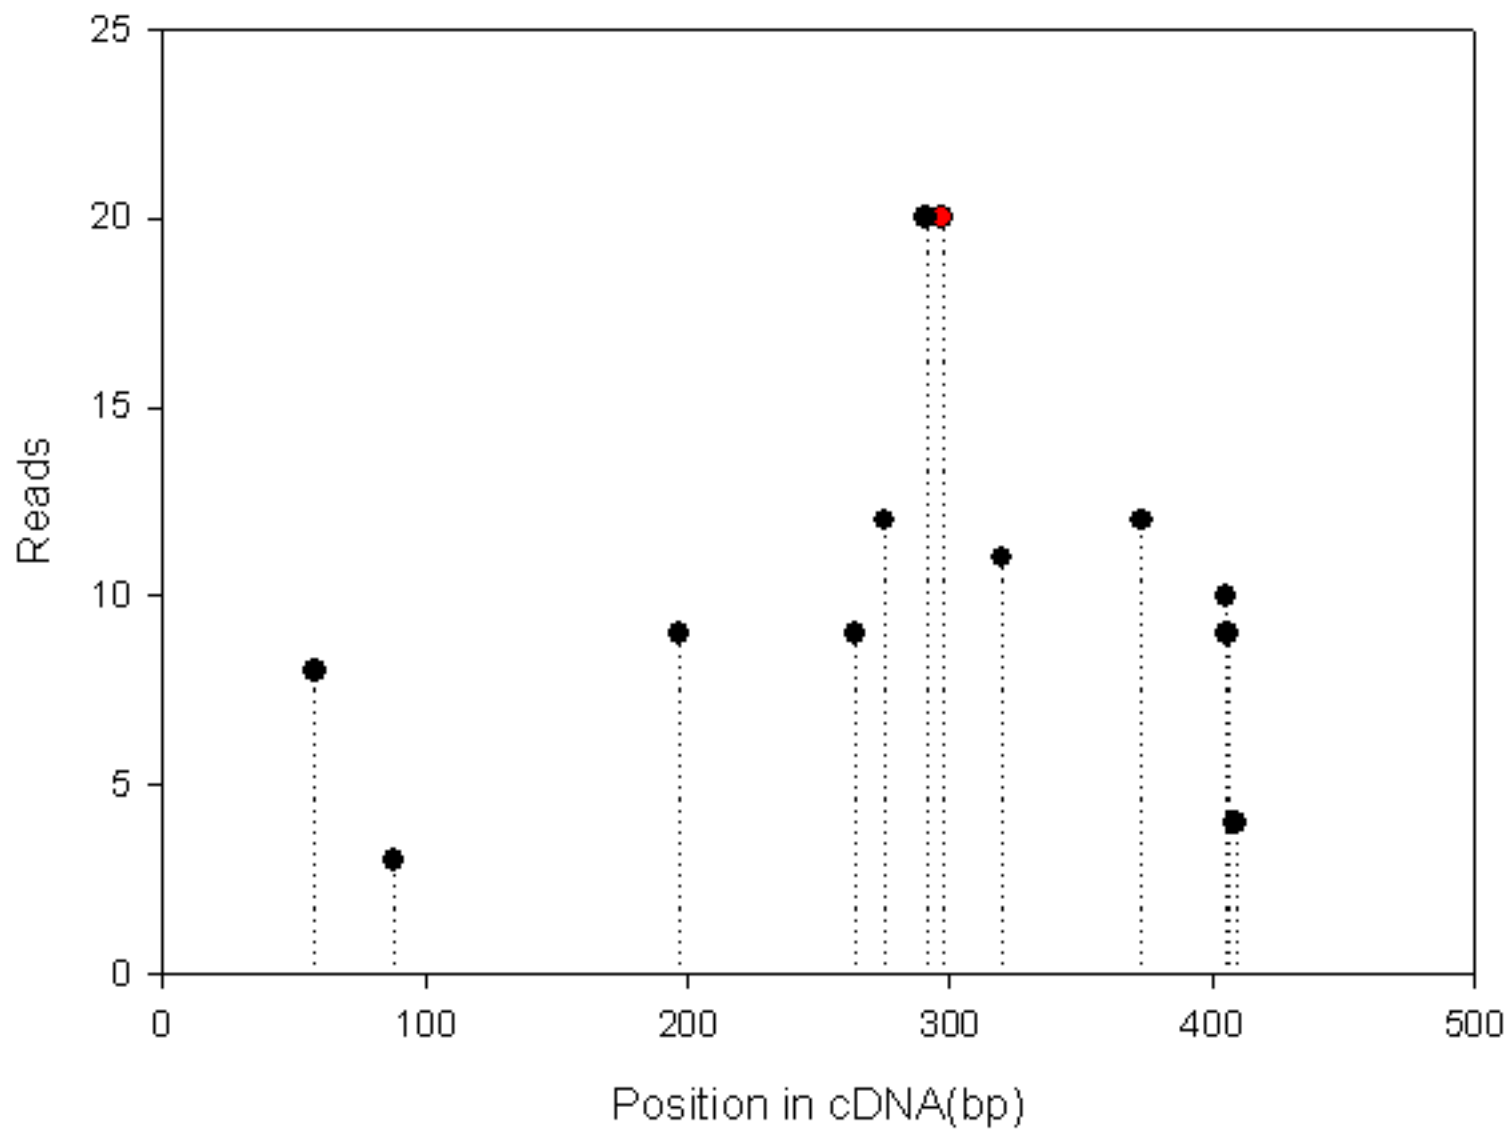

5' UUAAGUUU-GUCCAGCUAAUUCUGGU 3'  
 :::: ::::: :.::::  
 3' ---ACAAUCAAGGUAGGUUAAGA--- 5'

Cs8g03105.1

Csi-miR2275d

Csi-miR319, target=Cs3g06390.1 gene=Cs3g06390  
 Category:2  
 Score=4  
 Cleavage Site=773



```

5' UUGGAGCUCCCUUCACUCCAUAUAC 3'      Cs3g06390.1
   ::::::::::::::::::::
3' -UCCUCGAGGGAAGUCAGGUUU----- 5'    Csi-miR319
  
```

Csi-miR319b, target=Cs3g06390.1 gene=Cs3g06390  
 Category:2  
 Score=3  
 Cleavage Site=773

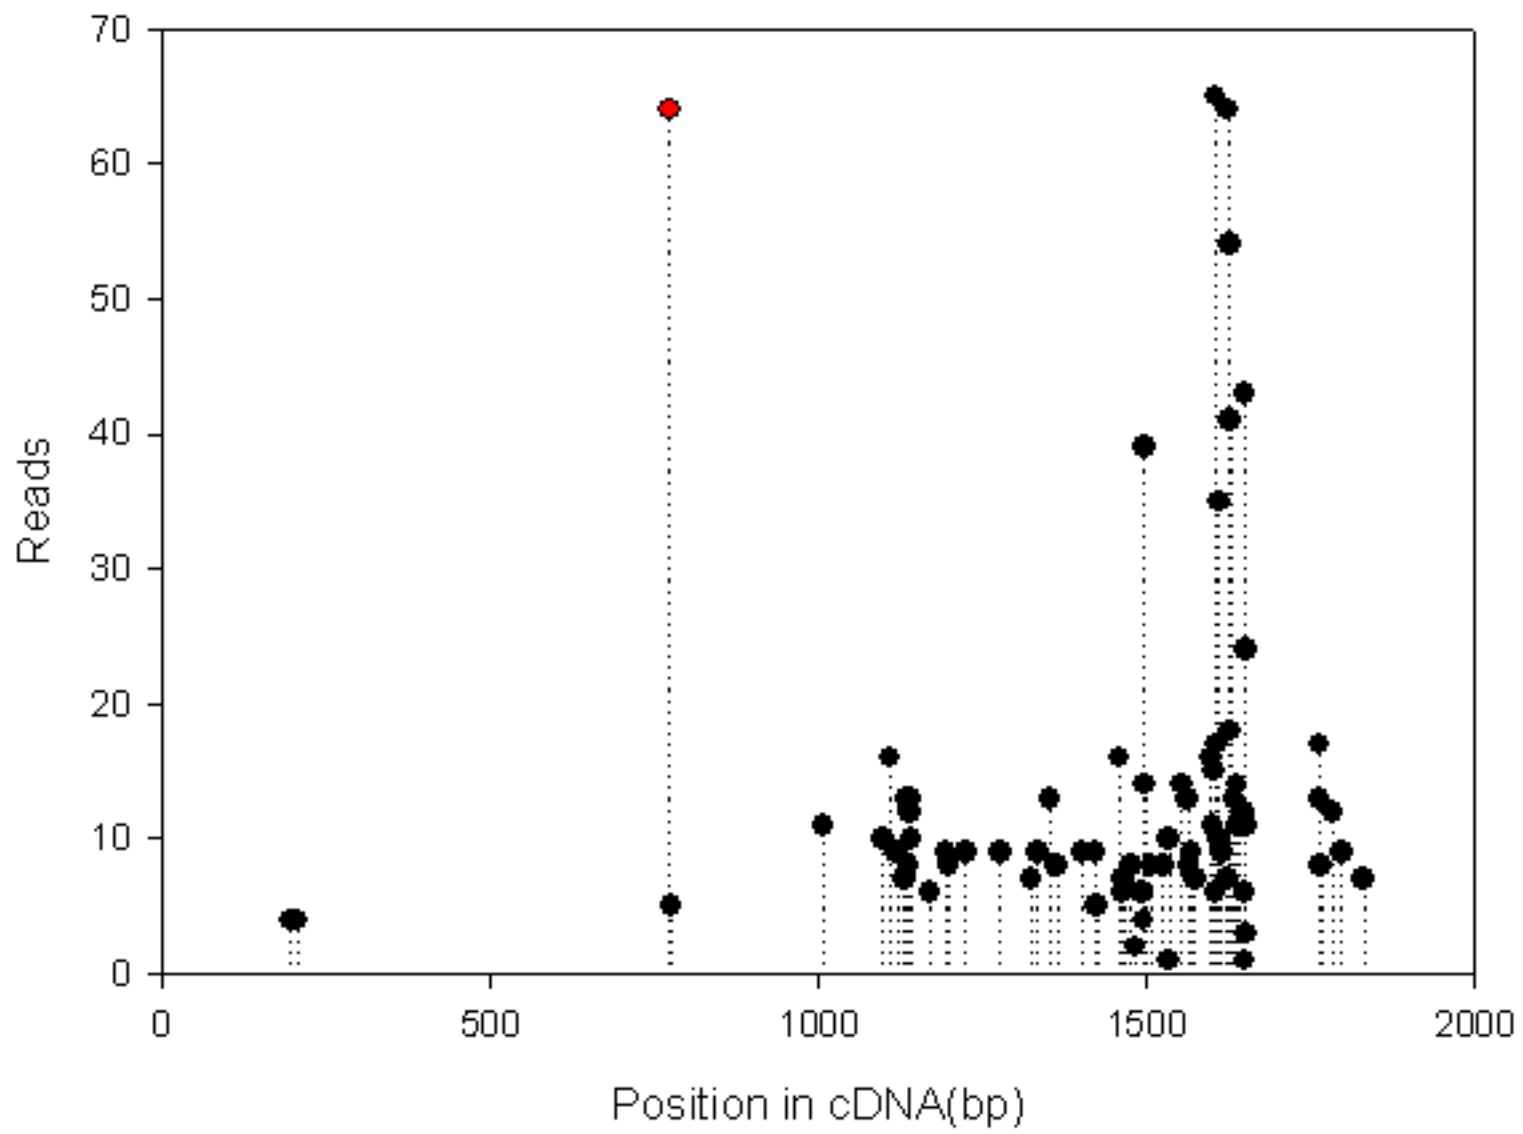

```

5' UGGAGCUCCCUUCACUCCAUAUAC 3'      Cs3g06390.1
   ::::::::::::::::::::
3' -CCCUCGAGGGAAGUCAGGU----- 5'    Csi-miR319b
  
```

Csi-miR390.1, target=Cs9g01780.1 gene=Cs9g01780  
 Category:2  
 Score=4.5  
 Cleavage Site=495

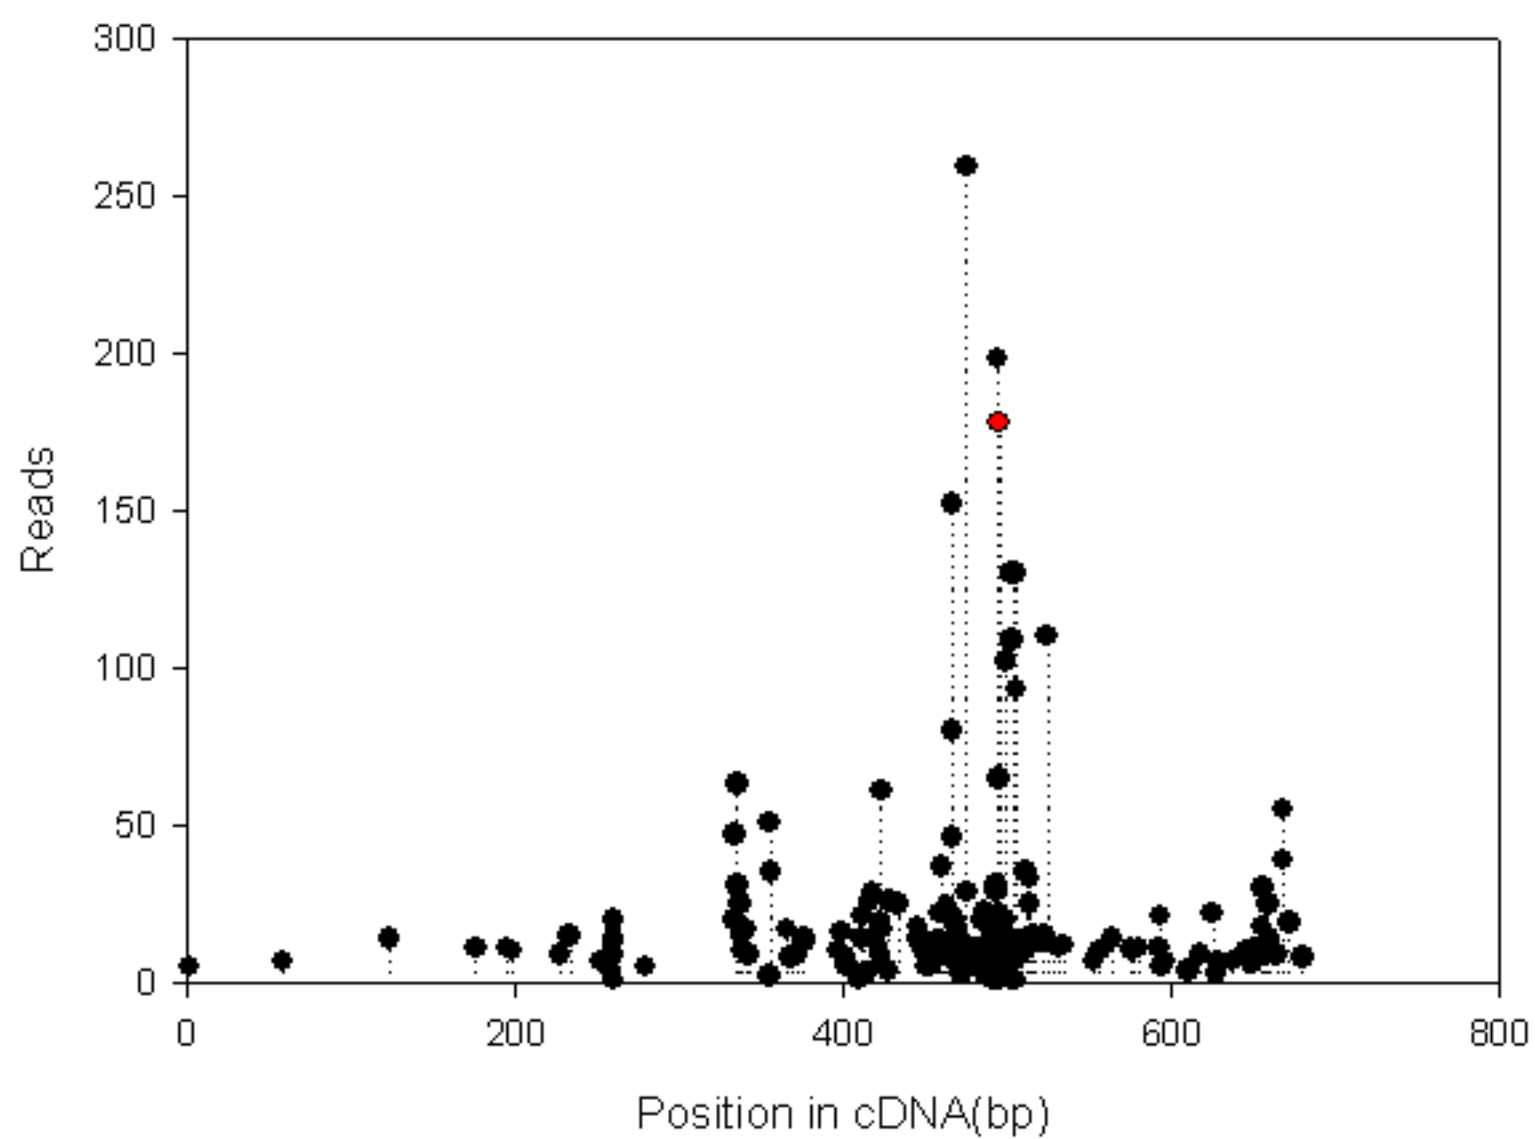

```

5' CUUCCUUGUCUAUCCCUCCUGAGCUG 3'      Cs9g01780.1
   . : : : : : : : : : : : : : :
3' ----CCGC-GAUAGGGAGGACUCGAA 5'      Csi-miR390.1

```

Csi-miR390.2, target=Cs9g01780.1 gene=Cs9g01780  
 Category:2  
 Score=3.5  
 Cleavage Site=494

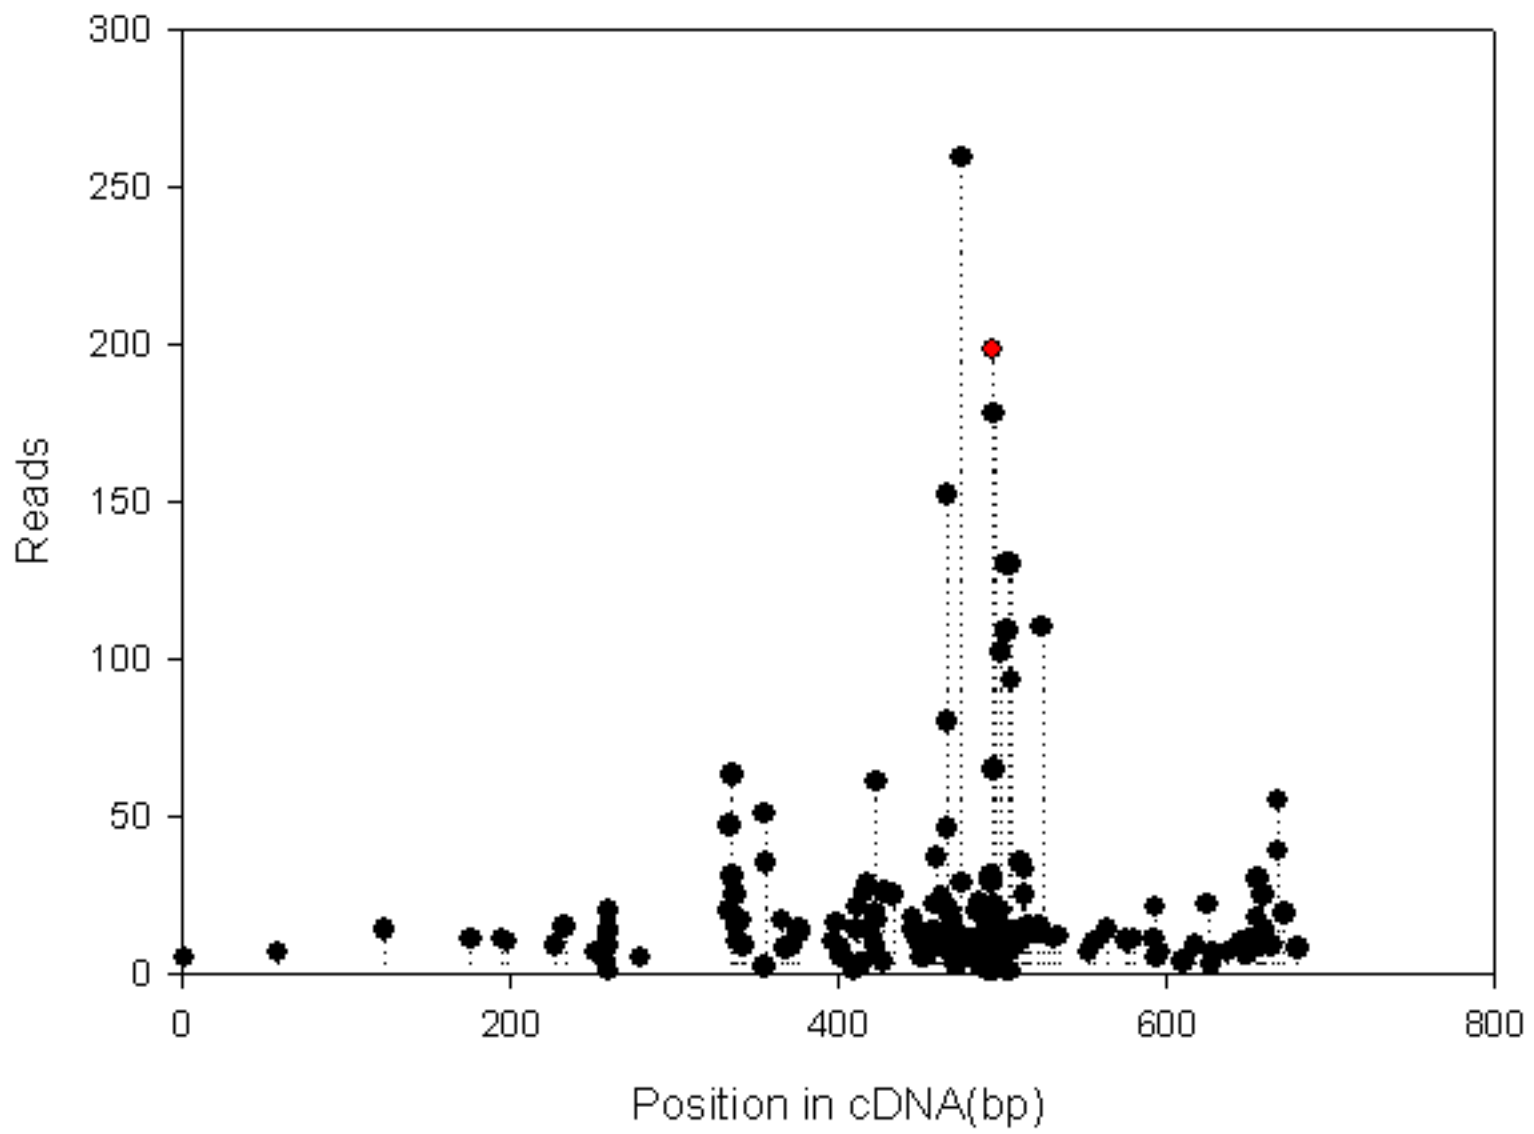

```

5' CCUCCUUGUCUAUCCCUCUGAGCU 3'      Cs9g01780.1
   .: ::::::::::::::::::::
3' -----CCGC-GAUAGGGAGGACUCGA 5'    Csi-miR390.2
  
```



Csi-miR390b, target=Cs9g01780.1 gene=Cs9g01780  
 Category:2  
 Score=0  
 Cleavage Site=495

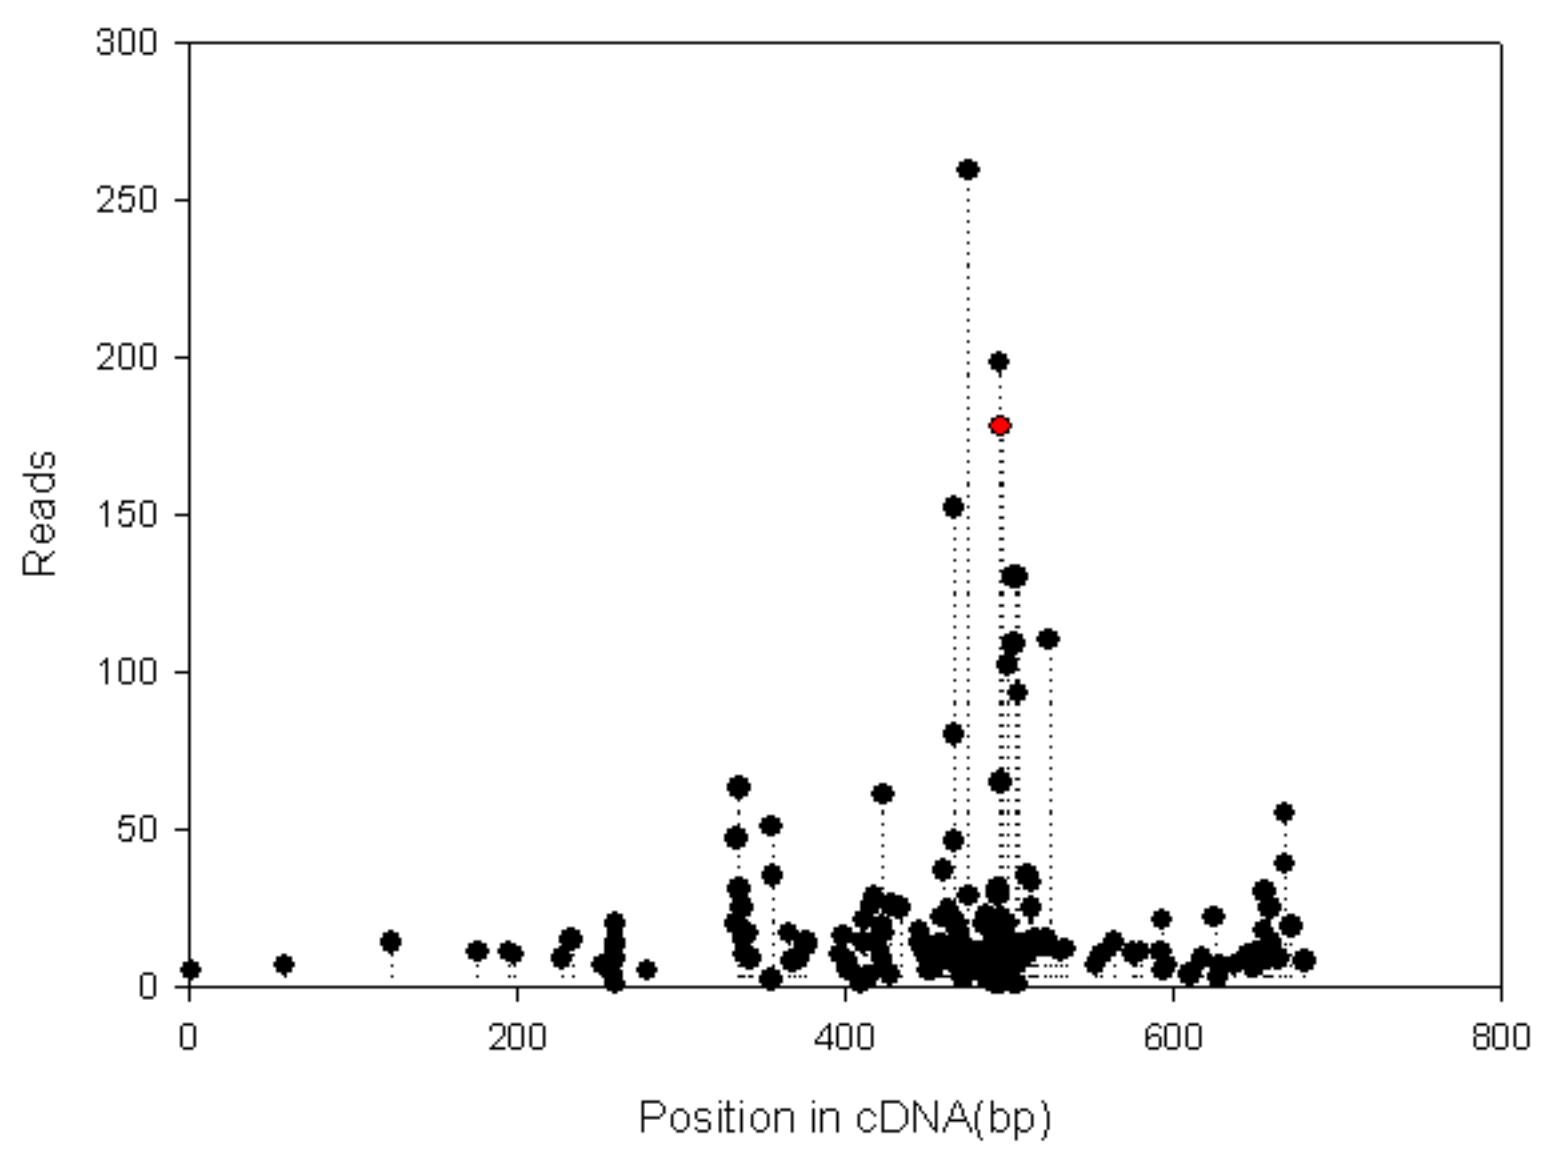

```

5' CUUCCUUGUCUAUCCCUCCUGAGCUG 3'      Cs9g01780.1
      ::::::::::::::::::::::::::::
3' -----AACAGAUAGGGAGGACUCGAC 5'      Csi-miR390b
  
```

Csi-miR393a.1, target=Cs2g14270.1 gene=Cs2g14270  
 Category:1  
 Score=1.5  
 Cleavage Site=2491

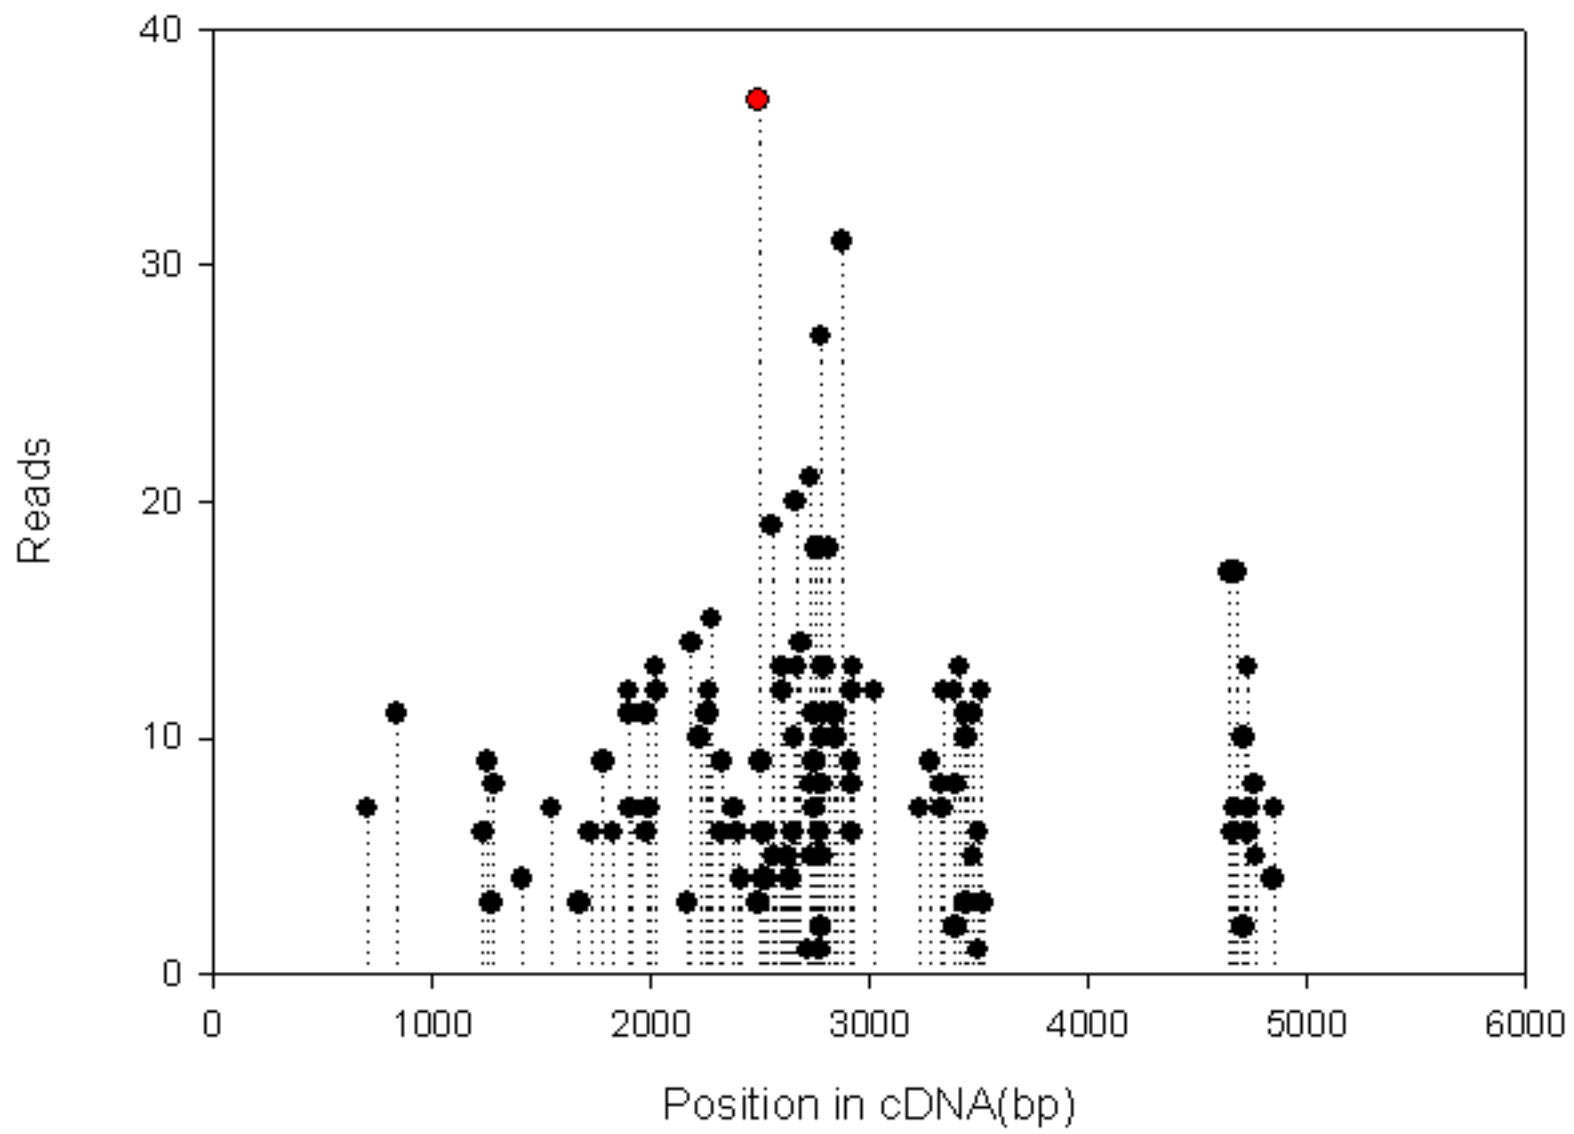

```

5' GAGACAAUGCGAUCCCUUUGGAUGUC 3'      Cs2g14270.1
   . : : : : : : : : : : : : : : :
3' --UAGUUACGCUAGGGAAACCU---- 5'      Csi-miR393a.1
  
```

Csi-miR393a.1, target=Cs7g31800.1 gene=Cs7g31800  
 Category:2  
 Score=5  
 Cleavage Site=1323

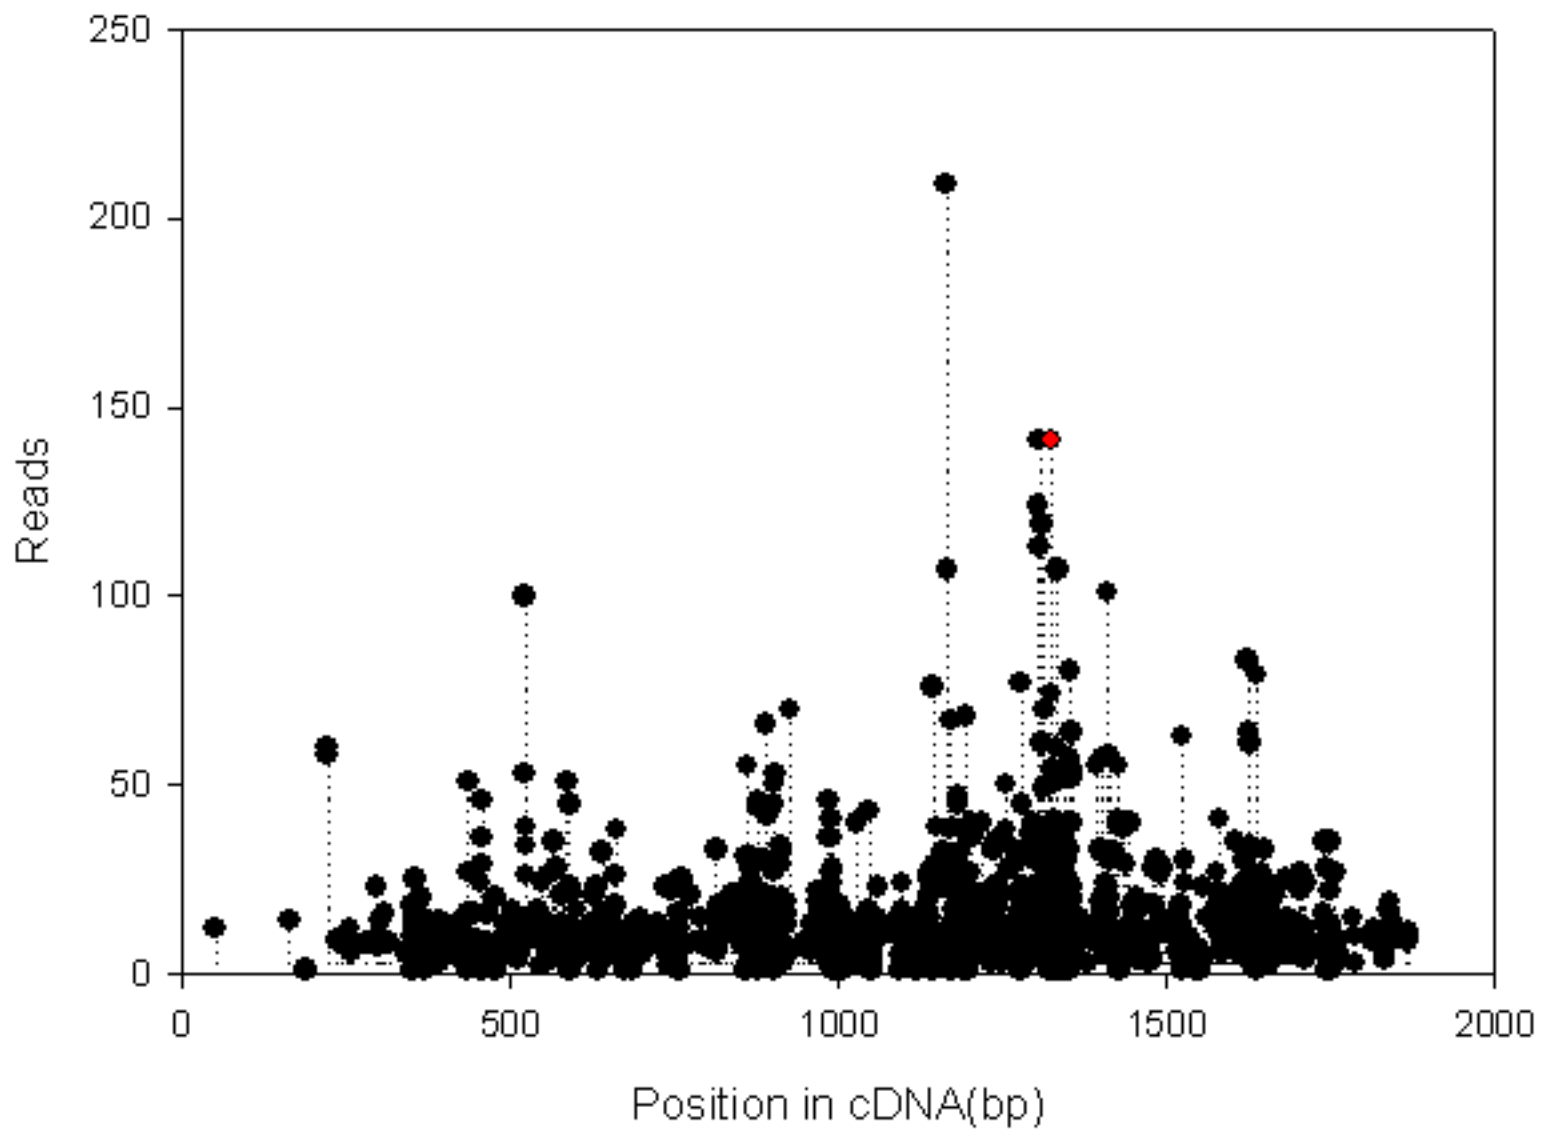

```

5'  GGCCAAUCCAU-UGAUUUCUUUGGAGC  3'      Cs7g31800.1
      :::  ::  .....:::
3'  -----UAGUUACGCUAGGGAAACCU--  5'      Csi-miR393a.1
  
```

Csi-miR393a.2, target=Cs2g14270.1 gene=Cs2g14270  
 Category:1  
 Score=1  
 Cleavage Site=2491

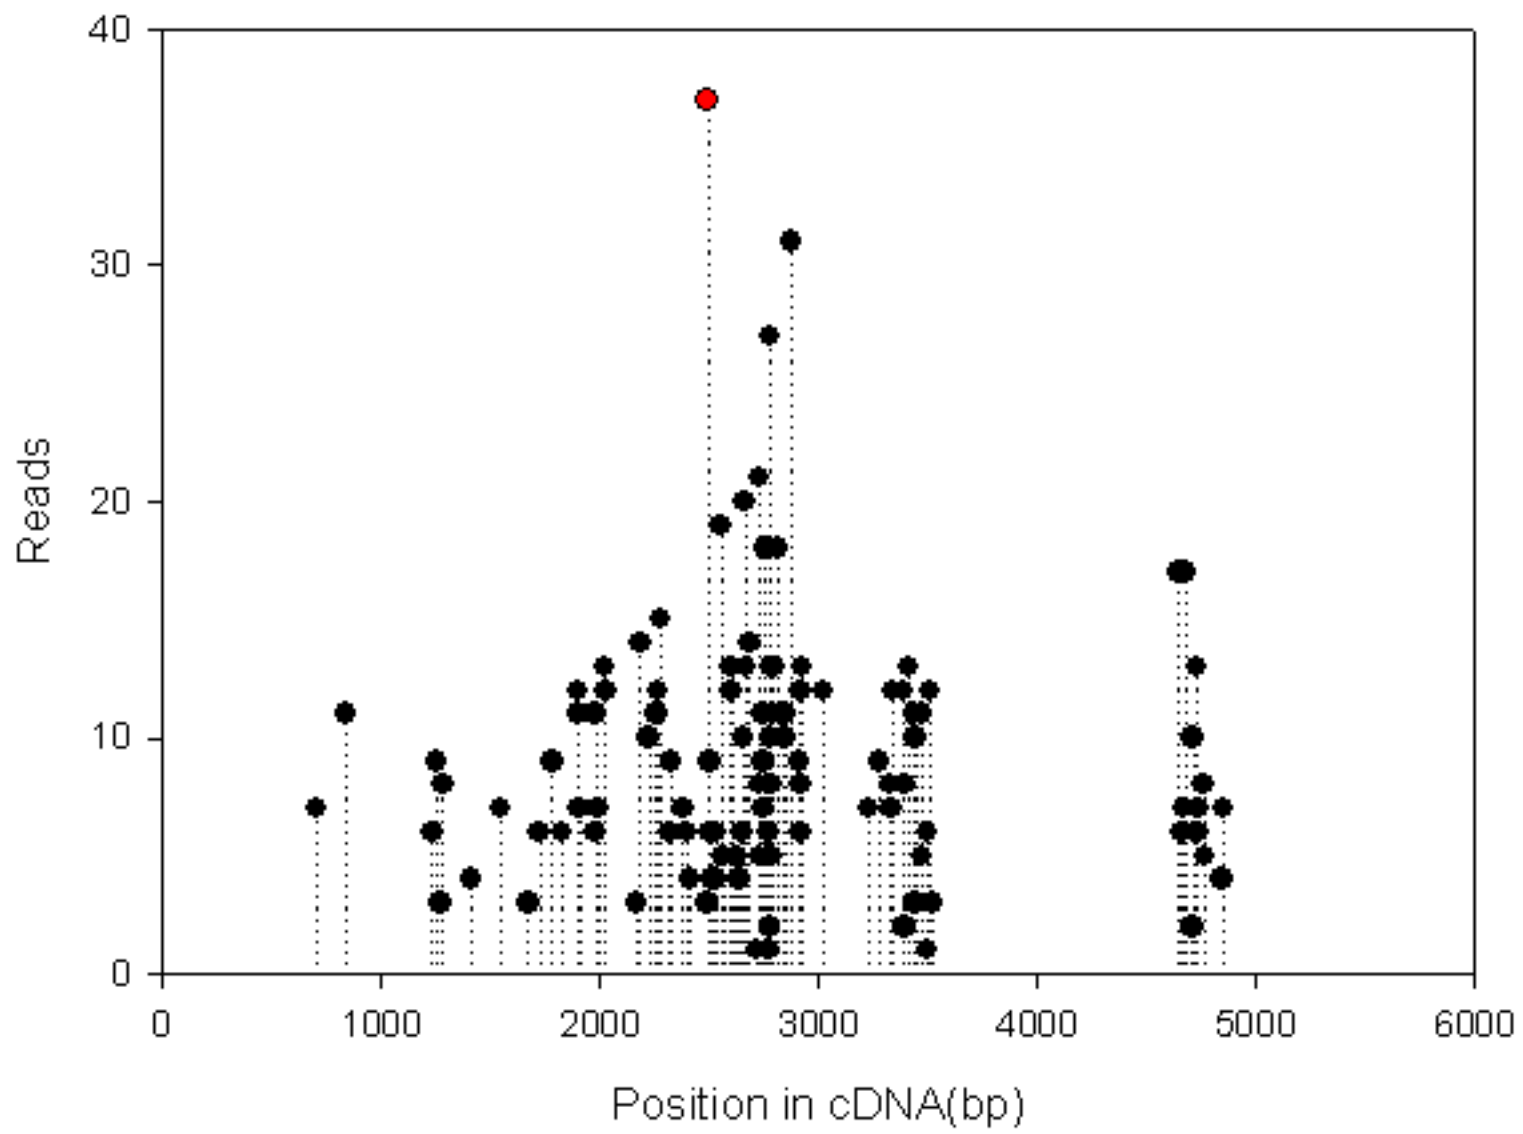

```

5' GAGA-CAAUGC GAUCCCUUUGGAUGUC 3'      Cs2g14270.1
   :: ::::::::::::::::::::
3' --CUAGUUACGCUAGGGAAACCU---- 5'      Csi-miR393a.2
  
```

Csi-miR393a.3, target=Cs2g14270.1 gene=Cs2g14270  
 Category:1  
 Score=2.5  
 Cleavage Site=2491



```

5' GAGACAAUGCGAUCCCUUUGGAUGUC 3'      Cs2g14270.1
   : . : : : : : : : : : : : : :
3' CCUAGUUACGCUAGGGAAACCU---- 5'      Csi-miR393a.3
  
```

Csi-miR393b, target=Cs2g14270.1 gene=Cs2g14270  
 Category:1  
 Score=2  
 Cleavage Site=2491



```

5' GAGA-CAAUGCGAUCCCUUUGGAUGUC 3'      Cs2g14270.1
   :: ::::::::::::::::::::
3' --CUAGUUACGCUAGGGAAACCUU--- 5'      Csi-miR393b
  
```

Csi-miR394, target=Cs2g02980.1 gene=Cs2g02980  
 Category:3  
 Score=5  
 Cleavage Site=1005

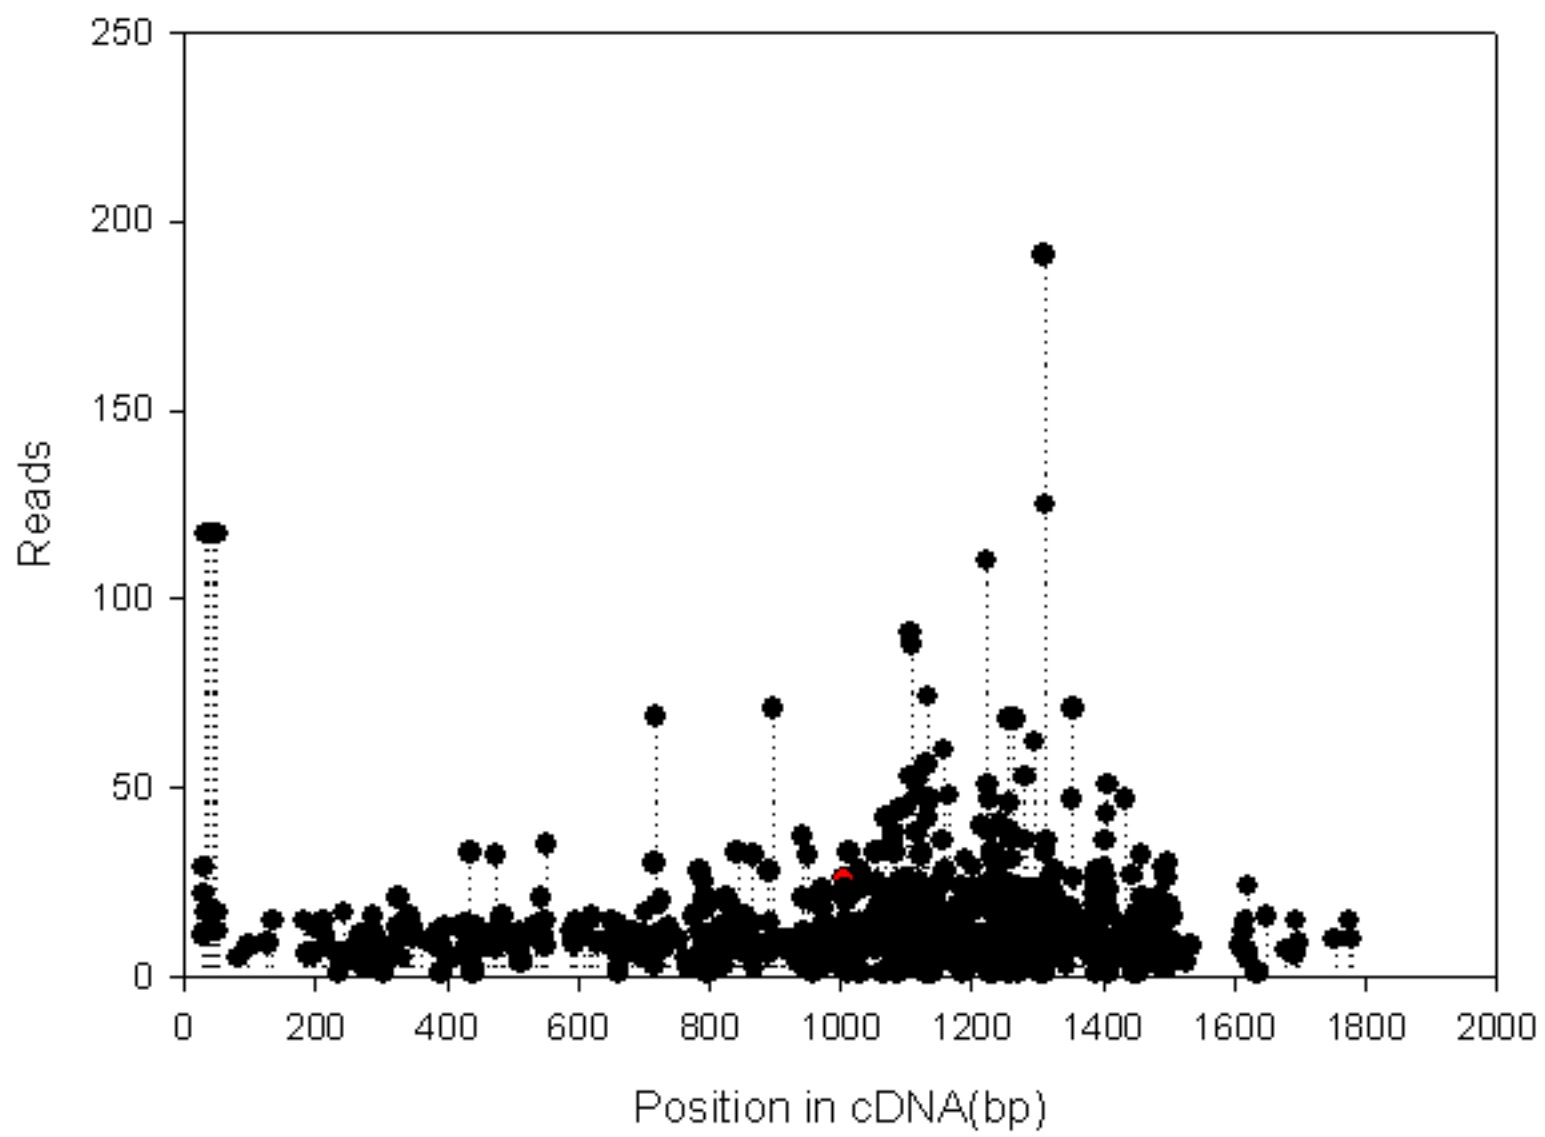

```

5' GAAGGUGGUGGUGGG-AGGAUGCCAAG 3'      Cs2g02980.1
   :: ::::.. :::::
3' -----CCUCCACCUGUCUACGGU- 5'      Csi-miR394
  
```

Csi-miR394, target=Cs7g10850.1 gene=Cs7g10850

Category:2

Score=1

Cleavage Site=1168

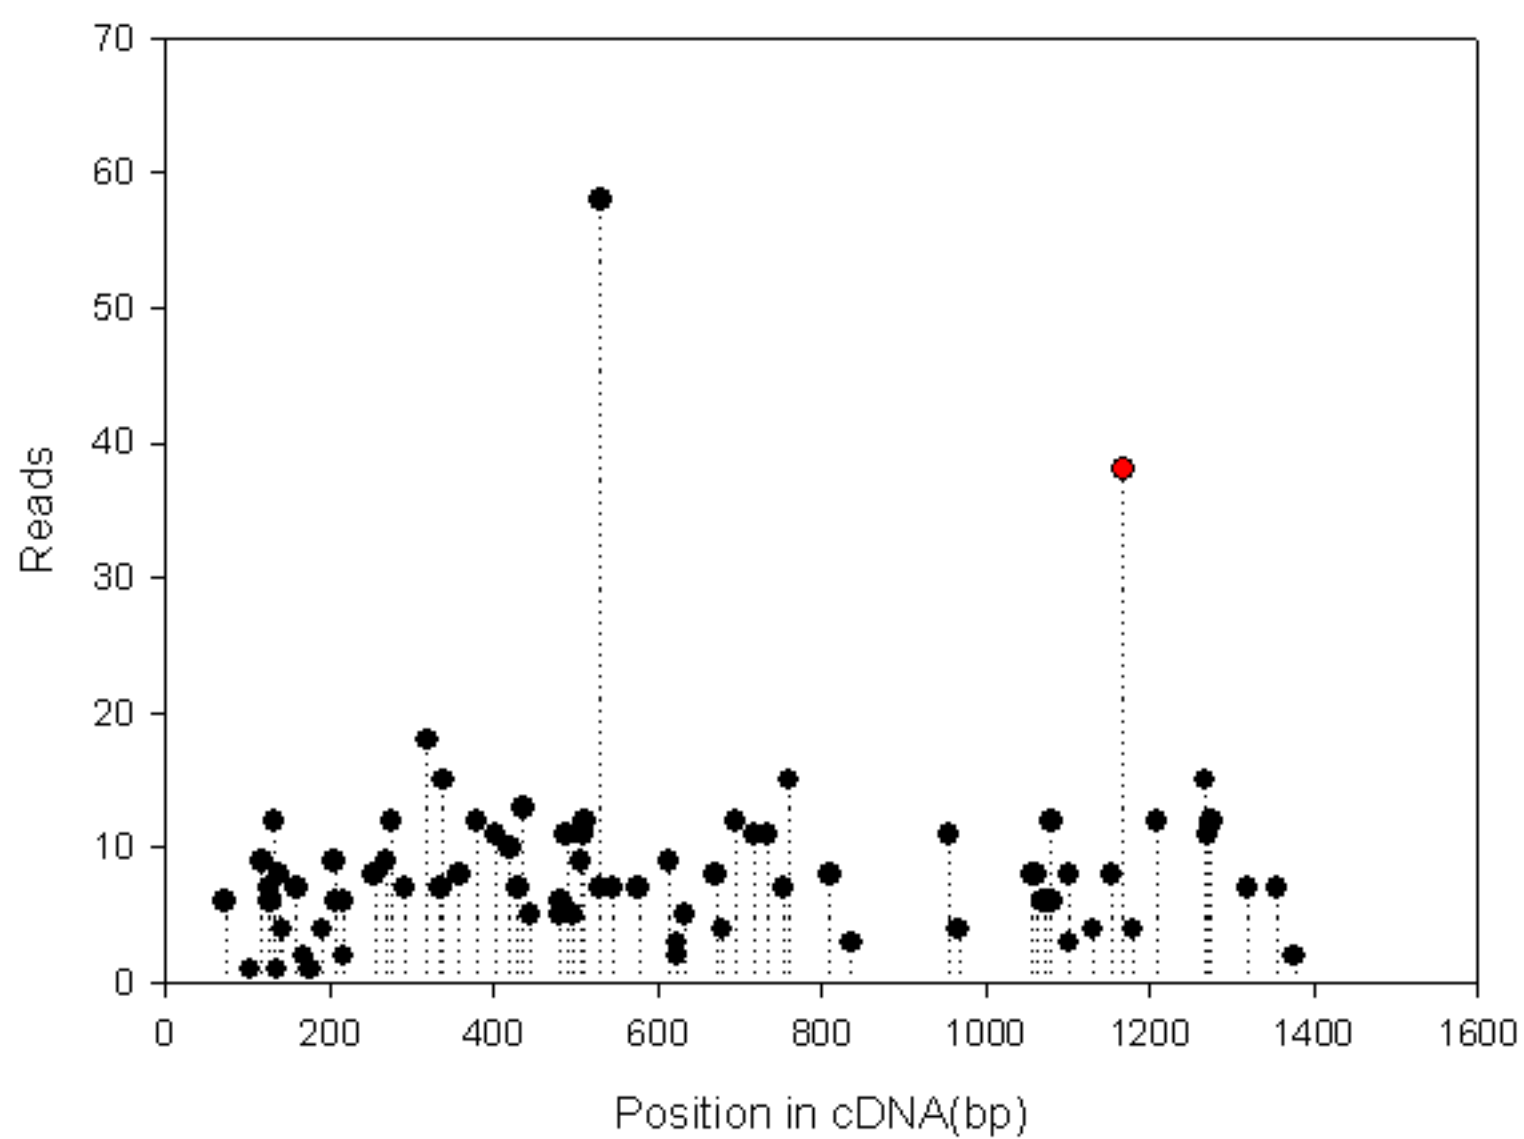

5' AAGGAGGUUGACAGAAUGCCAAUUAU 3'

Cs7g10850.1

.....

3' --CCUCCACCUGUCUUACGGUU---- 5'

Csi-miR394



Csi-miR395.2, target=Cs5g34330.1 gene=Cs5g34330  
 Category:1  
 Score=5  
 Cleavage Site=1443

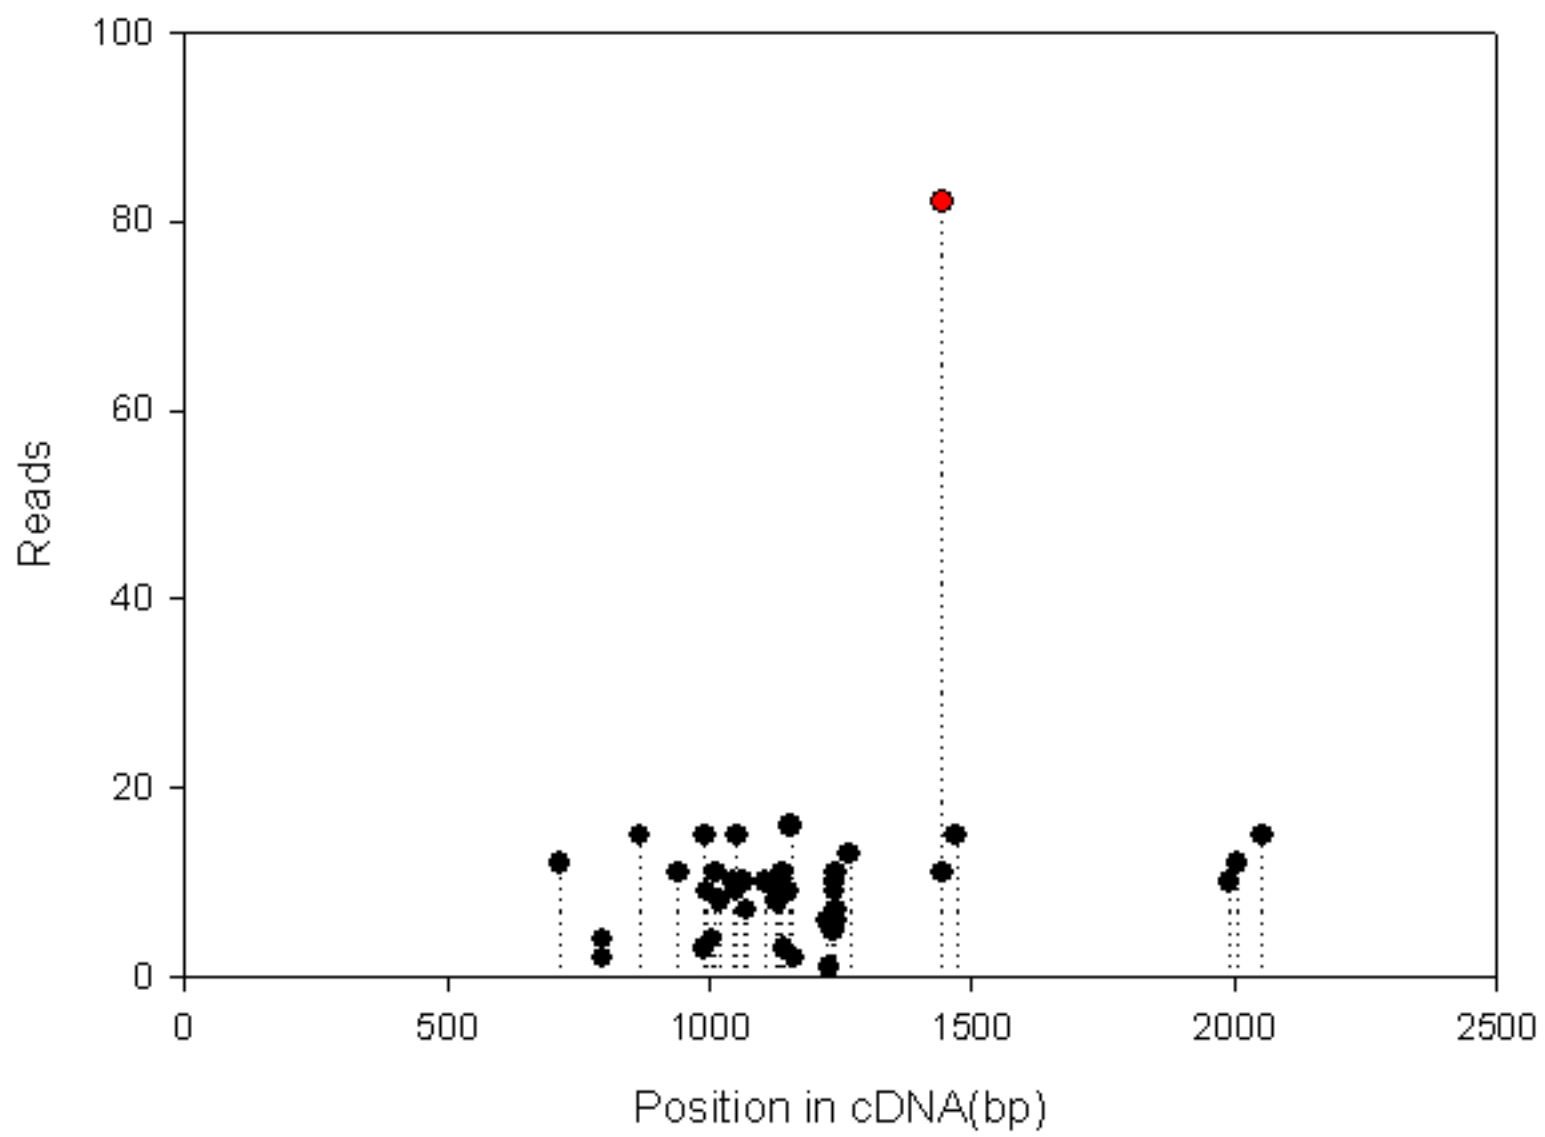

|                                   |              |
|-----------------------------------|--------------|
| 5' UUUUUAAGUU-UCCCAGACACUUUGGC 3' | Cs5g34330.1  |
| : : : : . : : : : : : : : : : .   |              |
| 3' -----CUCAAGGGGGUUUGUGAAGU-- 5' | Csi-miR395.2 |

Csi-miR3951, target=Cs1g06060.1 gene=Cs1g06060  
 Category:1  
 Score=2.5  
 Cleavage Site=174

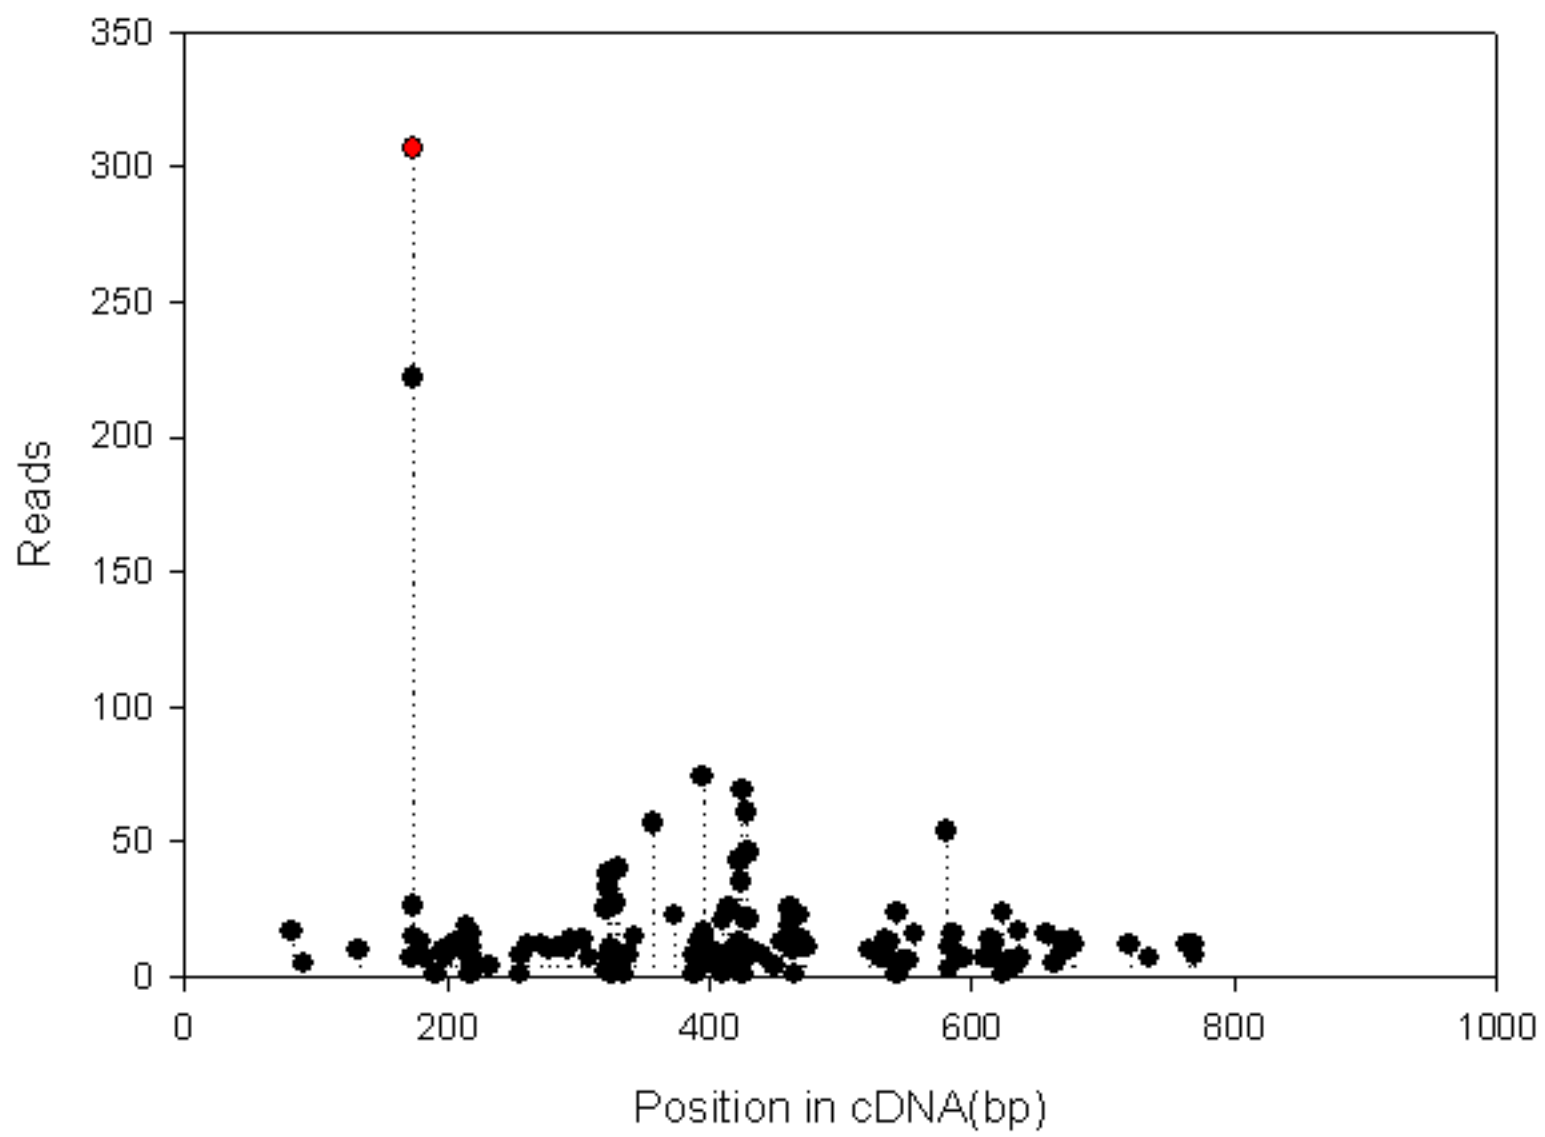

```

5' UUUUUUUCUCUC-UCUUUAUCUGUGGG 3'      Cs1g06060.1
   : : : : : : : : : : : : : : : : : :
3' --AAAAGAGAGUAGAAAUAGAU---- 5'      Csi-miR3951

```

Csi-miR3951, target=Orange1.1t05622.1 gene=Orange1.1t05622

Category:1

Score=2.5

Cleavage Site=113

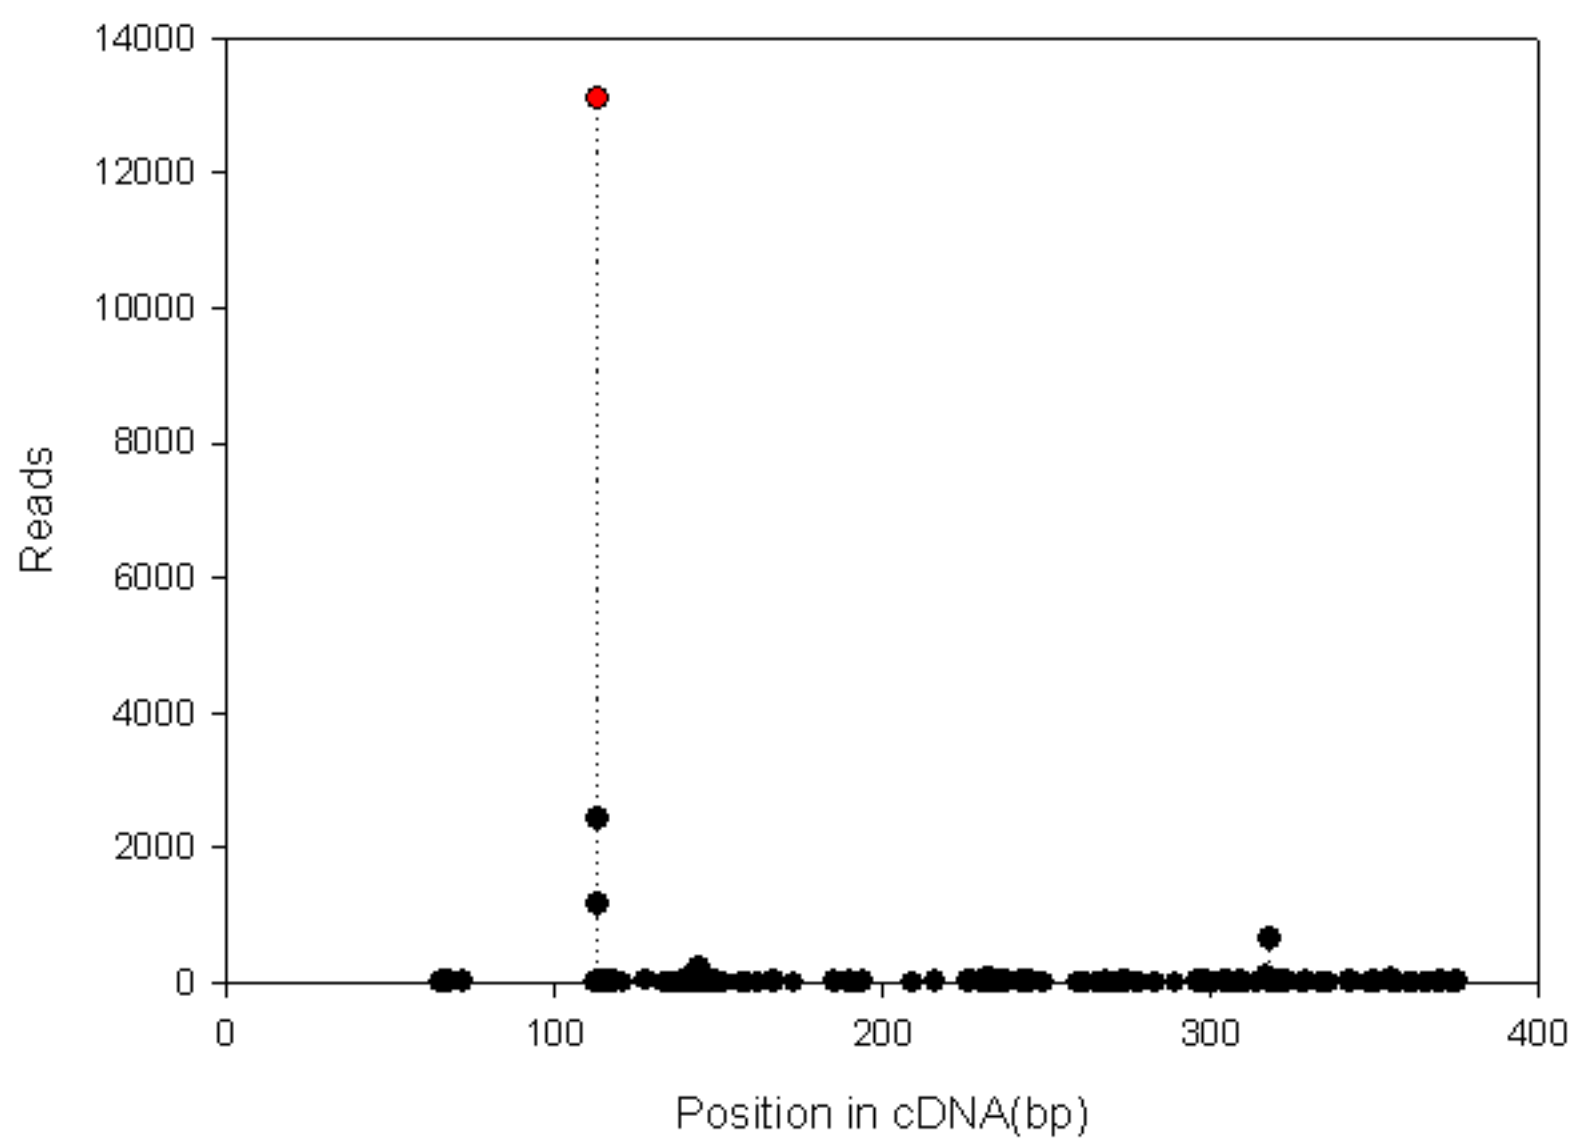

5' UUUUUUUCUCUC-UCUUUAUCUGUGGG 3'

Orange1.1t05622.1

.....

3' --AAAAGAGAGUAGAAUAGAU---- 5'

Csi-miR3951

Csi-miR3952-3p, target=Orange1.1t02252.1 gene=Orange1.1t02252  
 Category:2  
 Score=3.5  
 Cleavage Site=3970

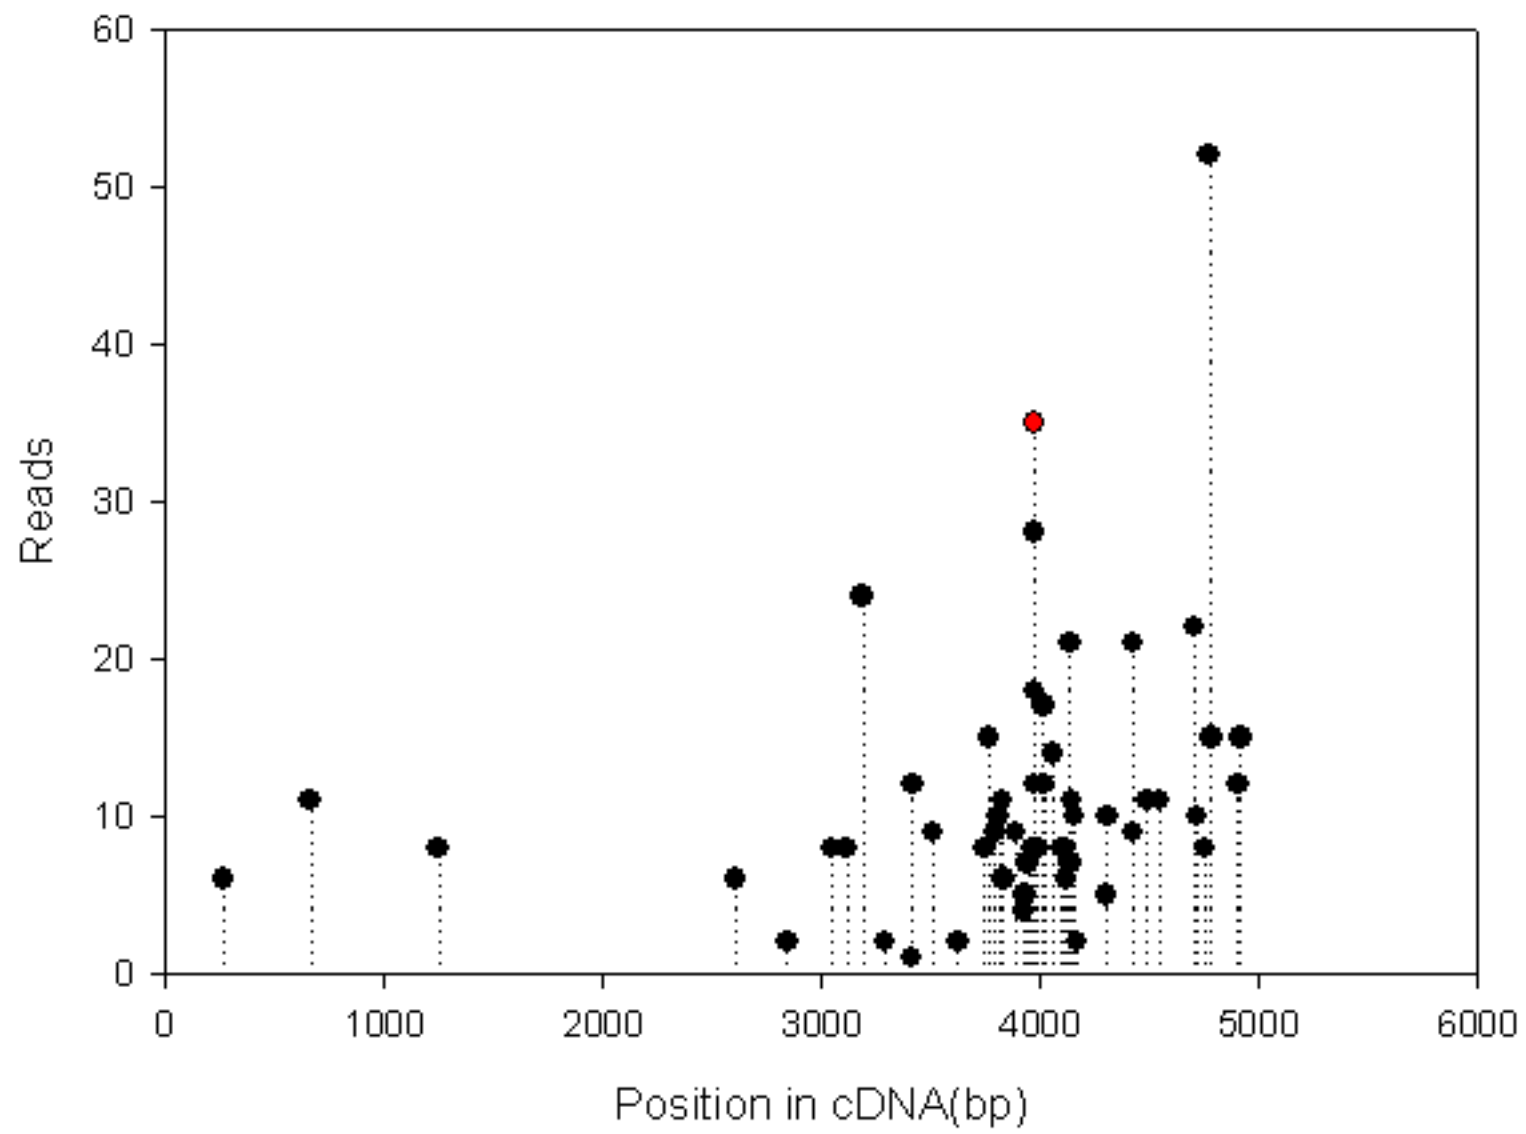

|                                   |                   |
|-----------------------------------|-------------------|
| 5' AAUGUGGGCUCUGGAAAGGCUCUUCU 3'  | Orange1.1t02252.1 |
| : : : : : : : : : : : : : : : : : |                   |
| 3' -----CACGAGAUCUUCCGGGAAGU 5'   | Csi-miR3952-3p    |

Csi-miR3954a, target=Cs1g09600.1 gene=Cs1g09600  
 Category:2  
 Score=1  
 Cleavage Site=416

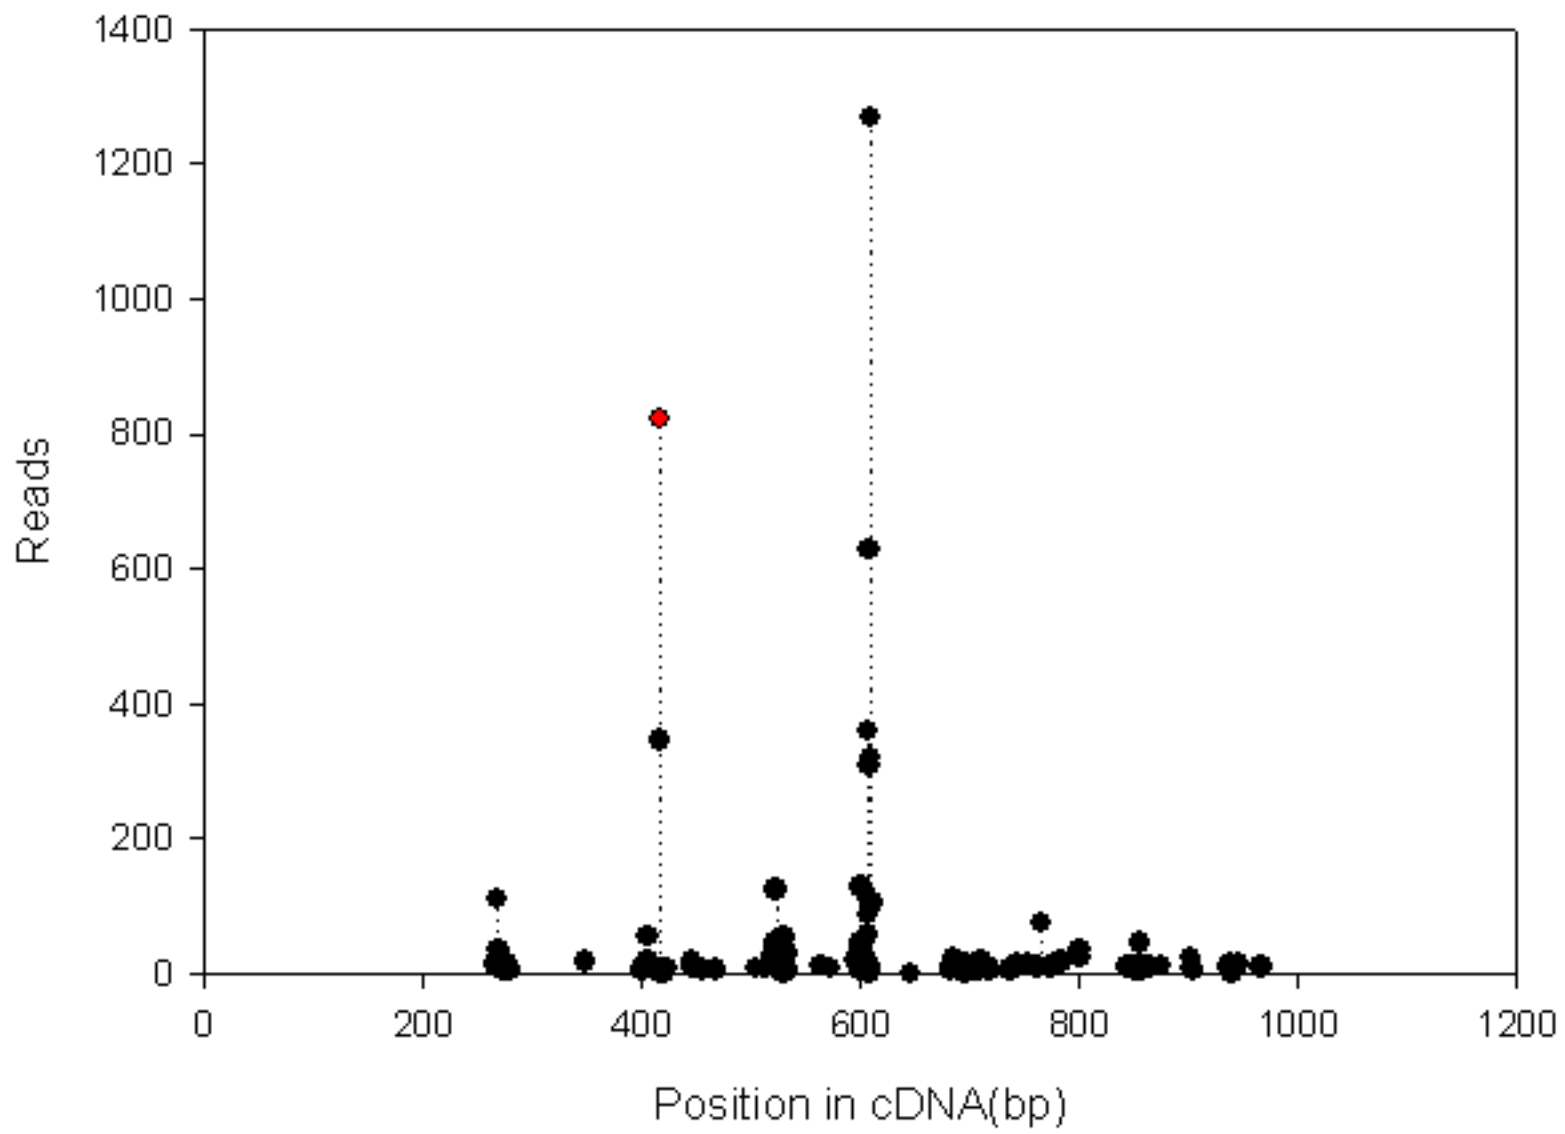

```

5' UGACCCUGAUUUCUCUGUCCAAGCAA 3'          Cs1g09600.1
   ::::: ::::::::::::::::::::
3' ACUGGCACUAAAGAGACAGGUU---- 5'          Csi-miR3954a
  
```

Csi-miR3954a, target=Cs1g09635.1 gene=Cs1g09635  
 Category:2  
 Score=1  
 Cleavage Site=351

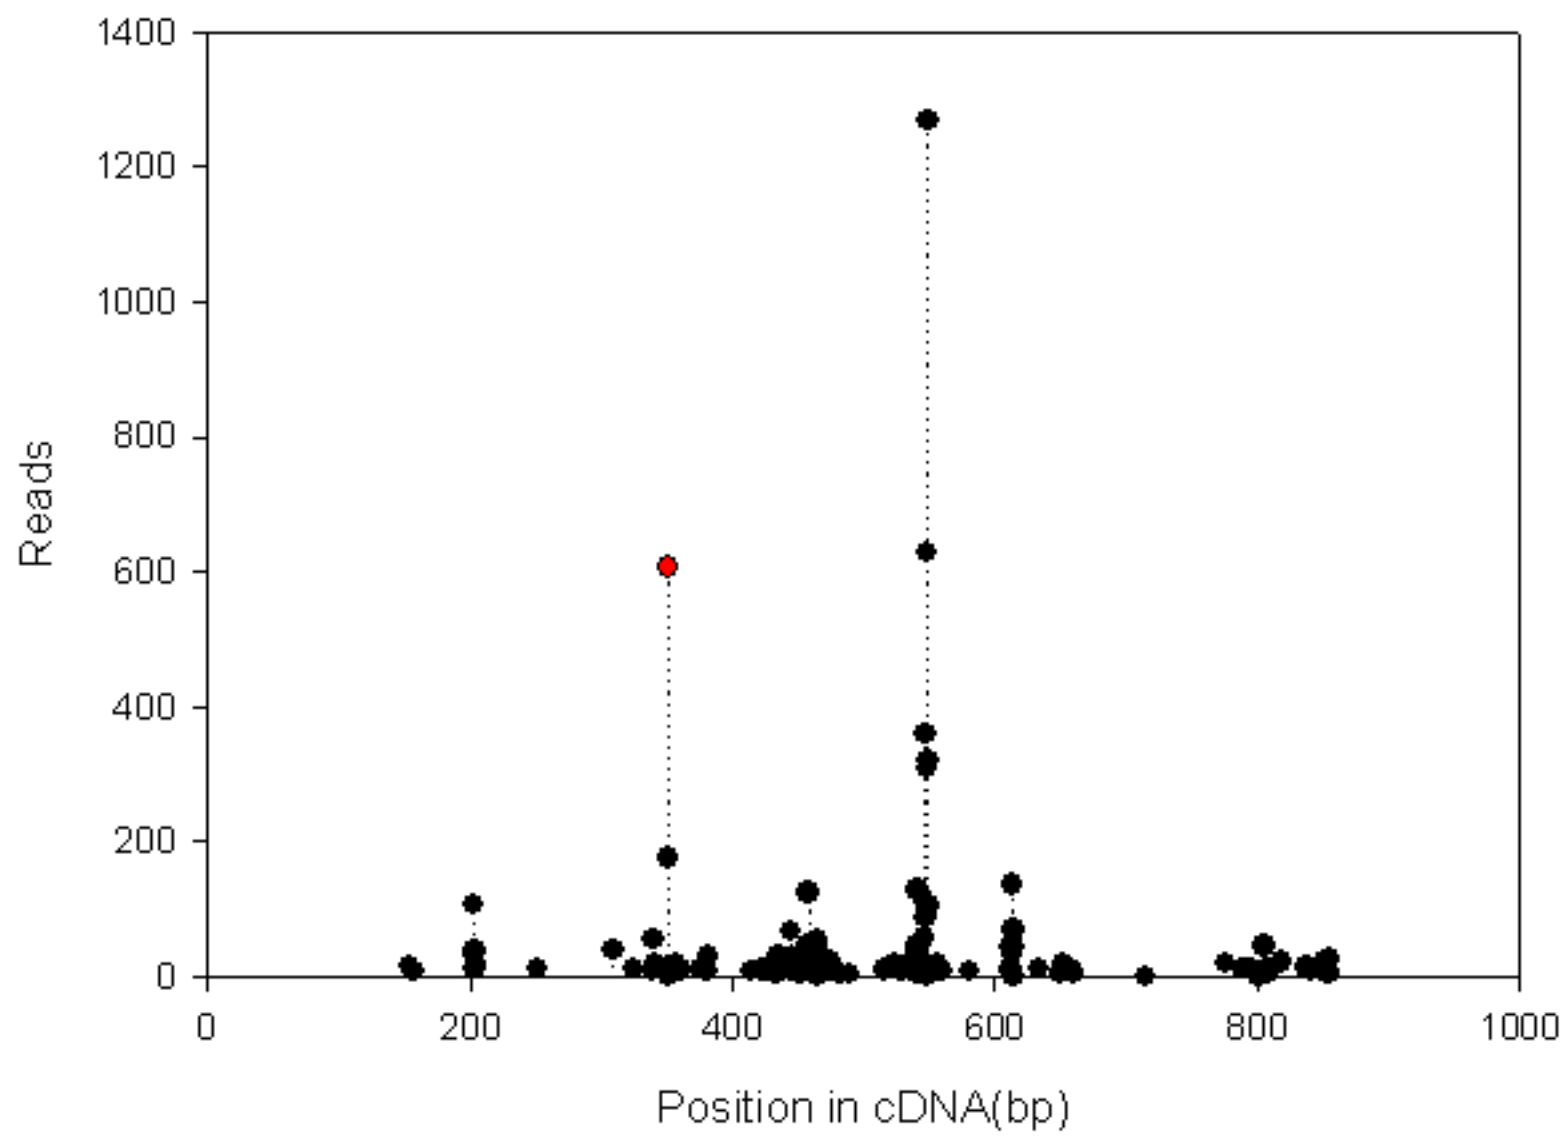

```

5' UGACCCUGAUUUCUCUGUCCAAACAG 3'      Cs1g09635.1
   : : : : : : : : : : : : : : : :
3' ACUGGCACUAAAGAGACAGGUU----- 5'    Csi-miR3954a
  
```

Csi-miR3954a, target=Cs5g04670.1 gene=Cs5g04670  
 Category:3  
 Score=1  
 Cleavage Site=142

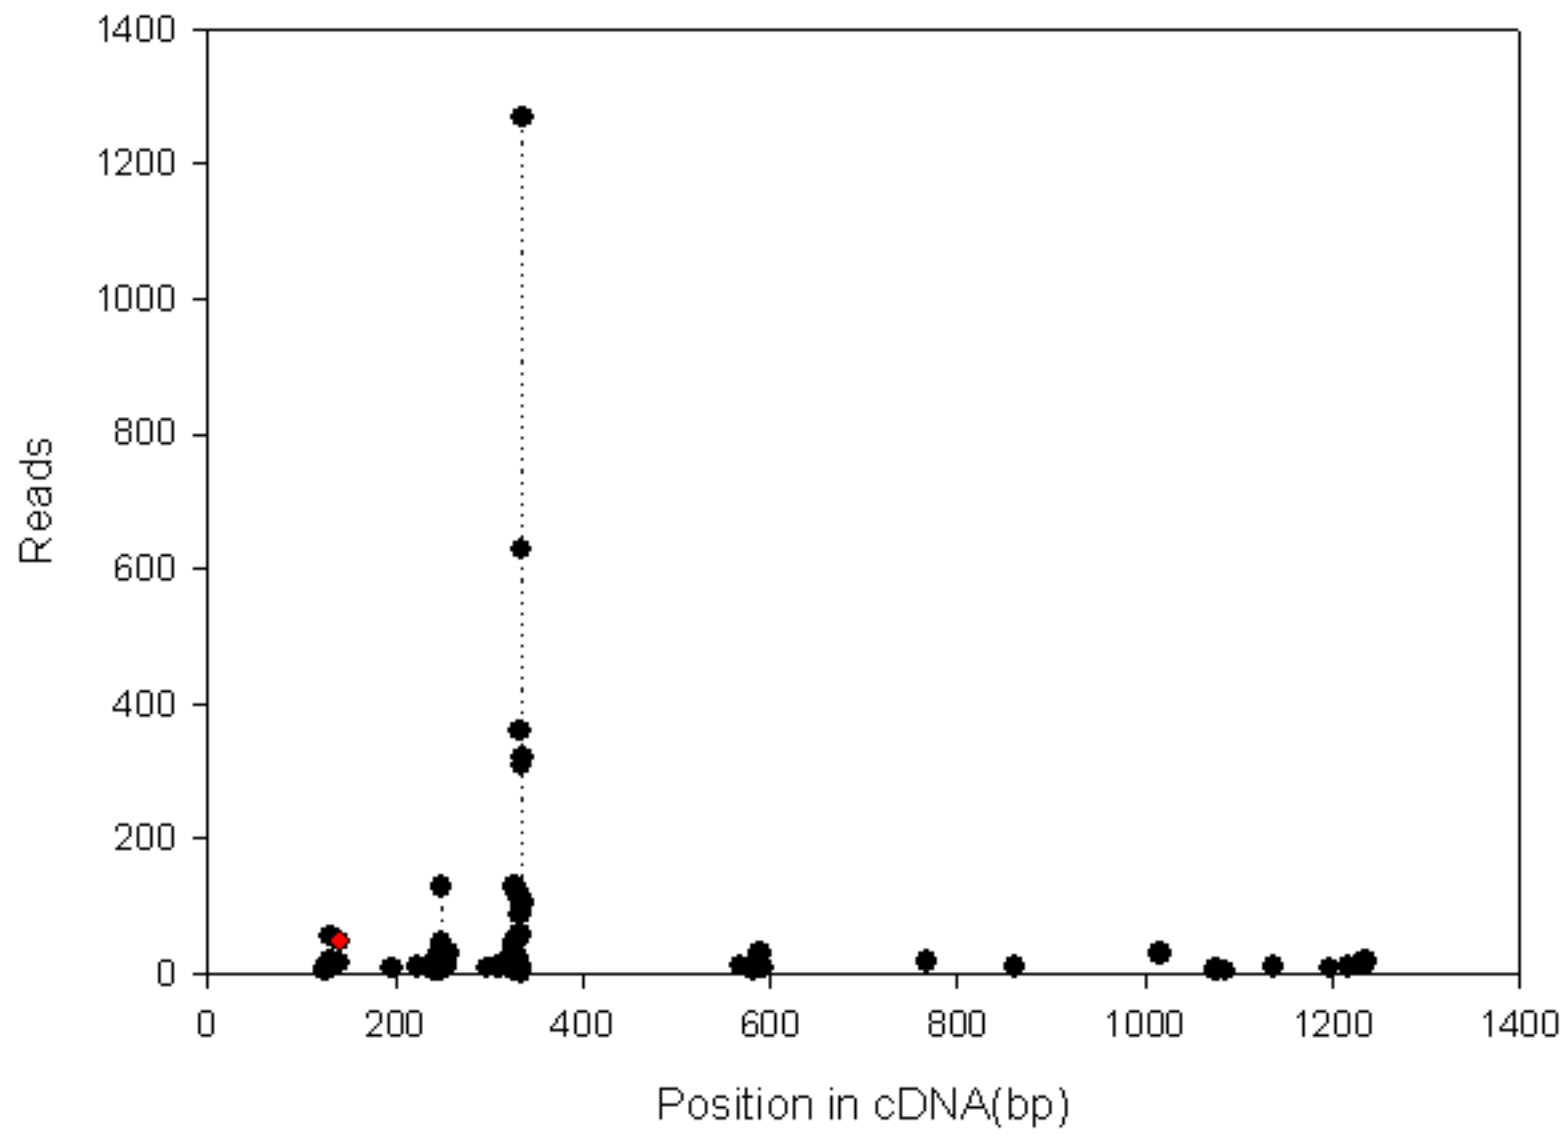

```

5' UGACCCUGAUUUCUCUGUCCAAACAA 3'          Cs5g04670.1
   : : : : : : : : : : : : : : : : : :
3' ACUGGCACUAAAGAGACAGGUU----- 5'      Csi-miR3954a
  
```

Csi-miR3954a, target=Cs7g22460.1 gene=Cs7g22460  
 Category:2  
 Score=0.5  
 Cleavage Site=214

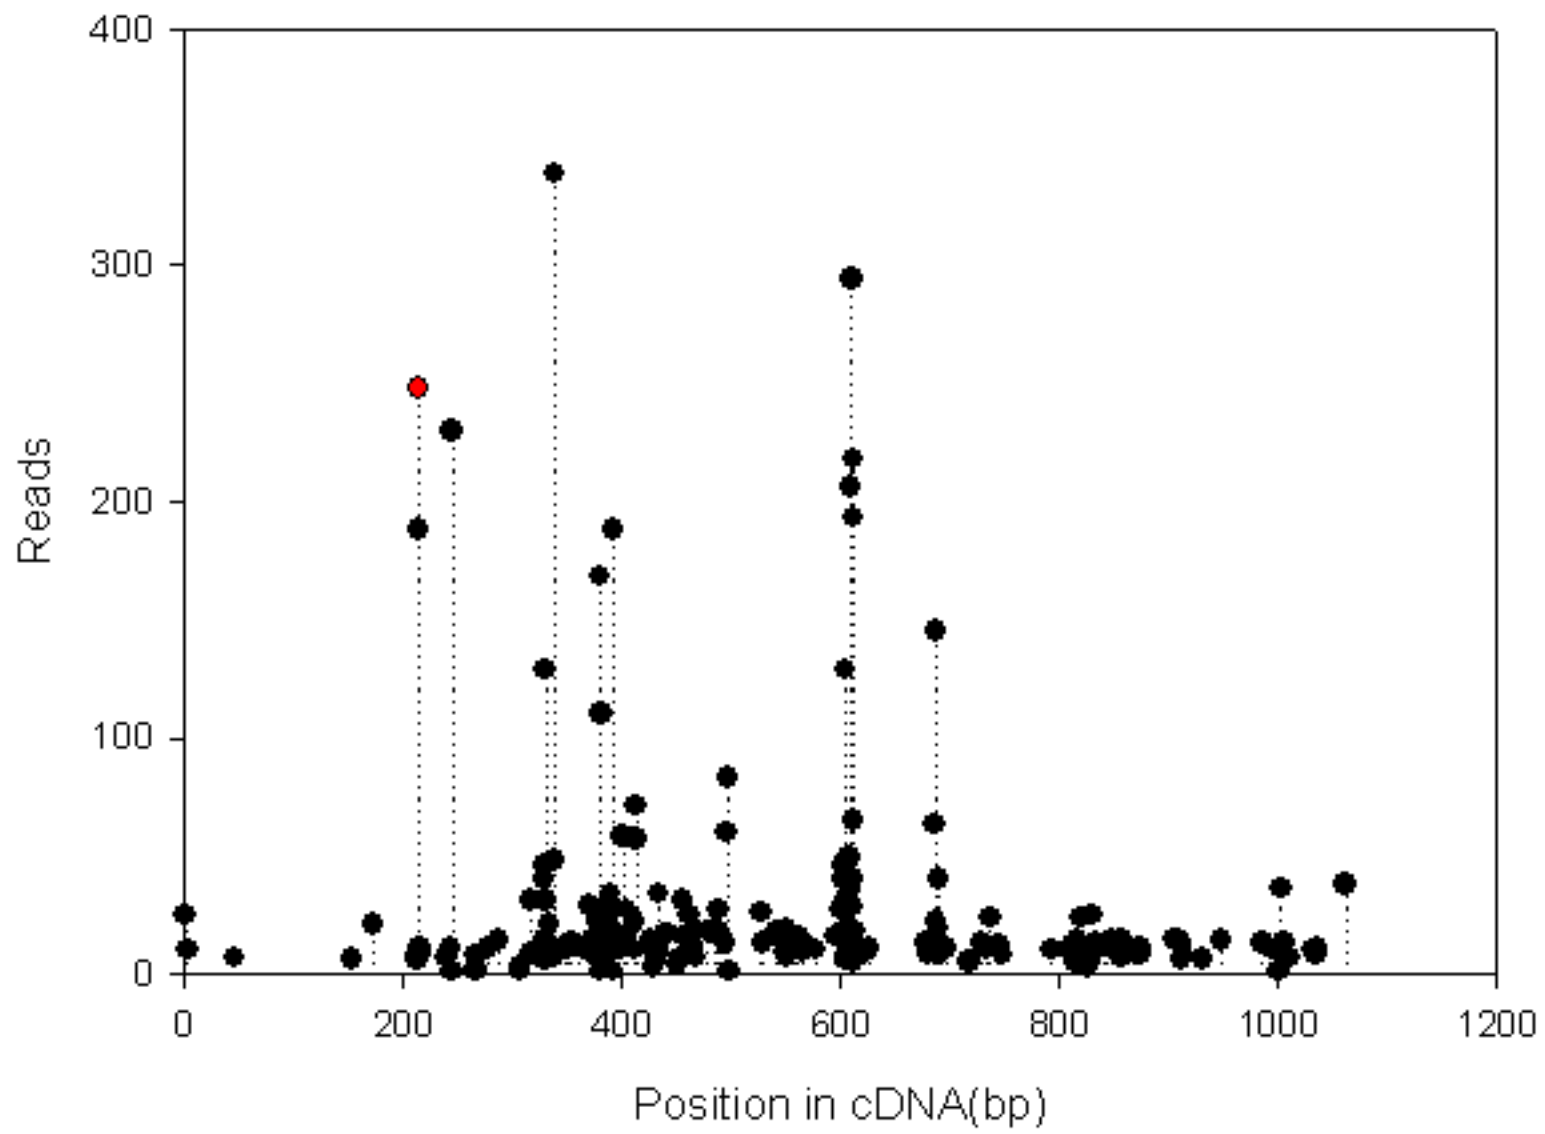

```

5'  UGACCGUGAUUUCUCUGUCCAGCCAA  3'      Cs7g22460.1
      .....
3'  ACUGGCACUAAAGAGACAGGU-----  5'      Csi-miR3954a
  
```



Csi-miR3954b, target=Cs1g09600.1 gene=Cs1g09600  
 Category:2  
 Score=1  
 Cleavage Site=416

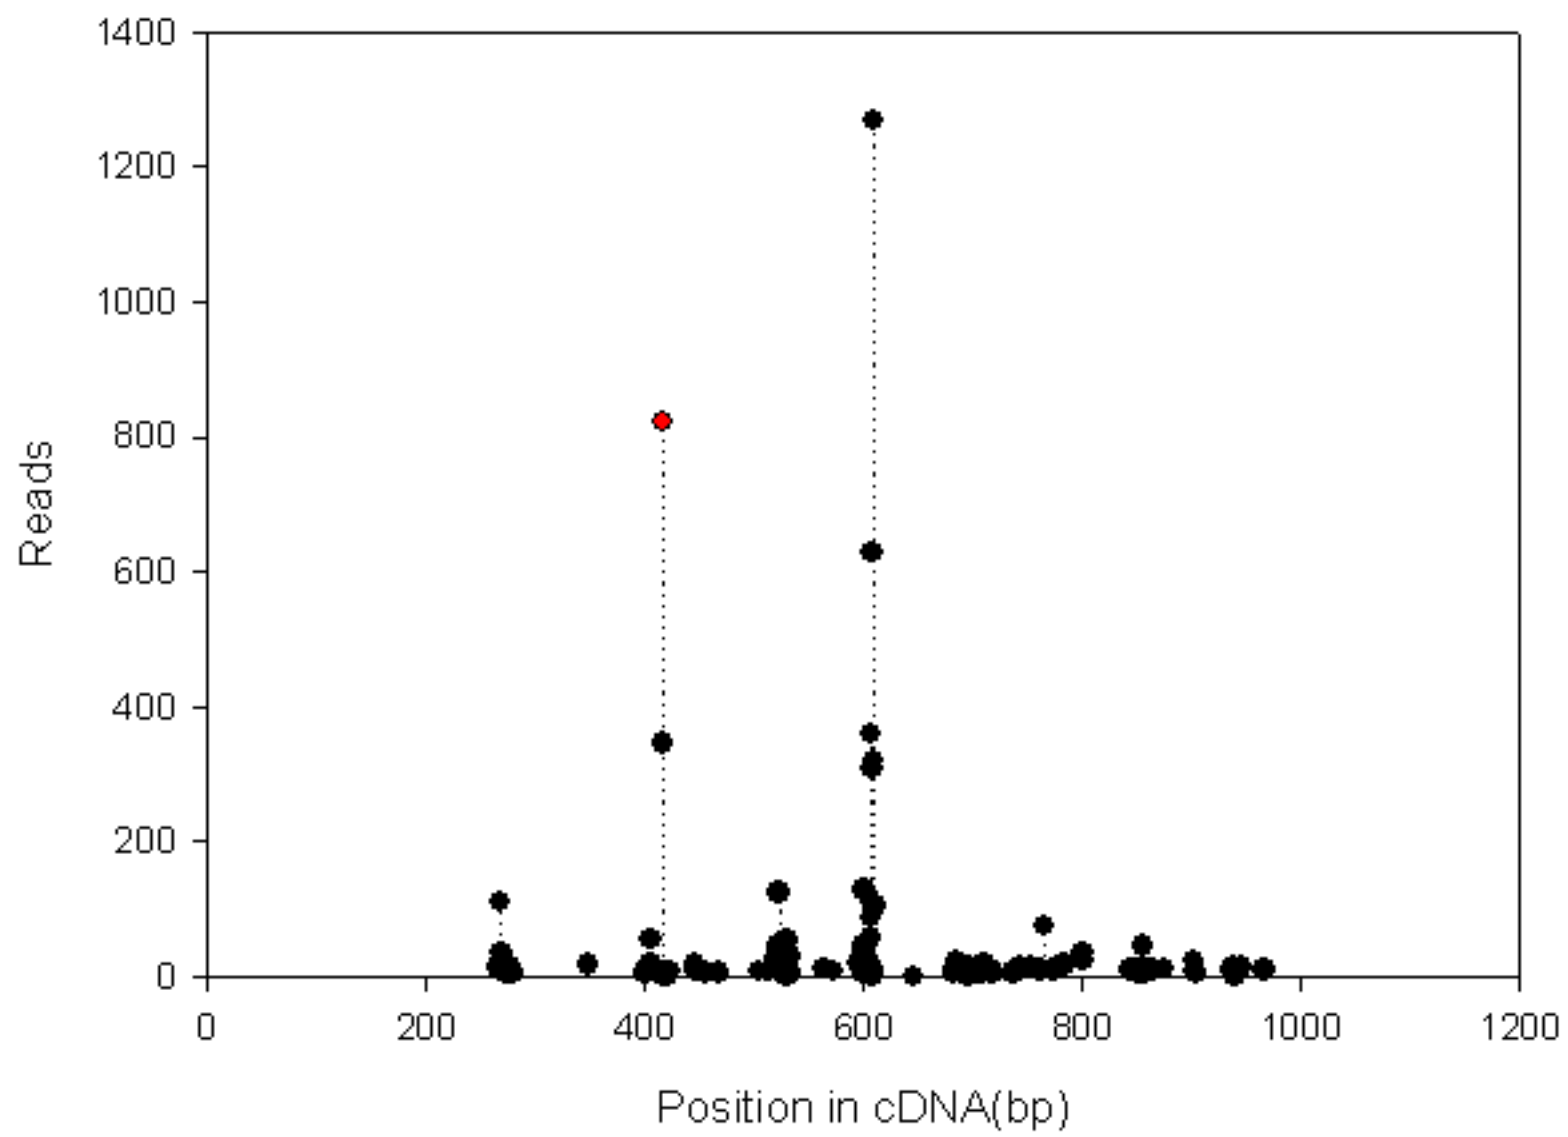

|    |                            |    |              |
|----|----------------------------|----|--------------|
| 5' | UGACCCUGAUUUCUCUGUCCAAGCAA | 3' | Cs1g09600.1  |
|    | .....                      |    |              |
| 3' | ACUGGCACUAAAGAGACAGG-----  | 5' | Csi-miR3954b |

Csi-miR3954b, target=Cs1g09635.1 gene=Cs1g09635  
 Category:2  
 Score=1  
 Cleavage Site=351



```

5' UGACCCUGAUUUCUCUGUCCAAACAG 3' Cs1g09635.1
   ::::: ::::::::::::::::::::
3' ACUGGCACUAAAGAGACAGG----- 5' Csi-miR3954b
  
```

Csi-miR3954b, target=Cs1g09665.1 gene=Cs1g09665  
 Category:3  
 Score=0  
 Cleavage Site=416

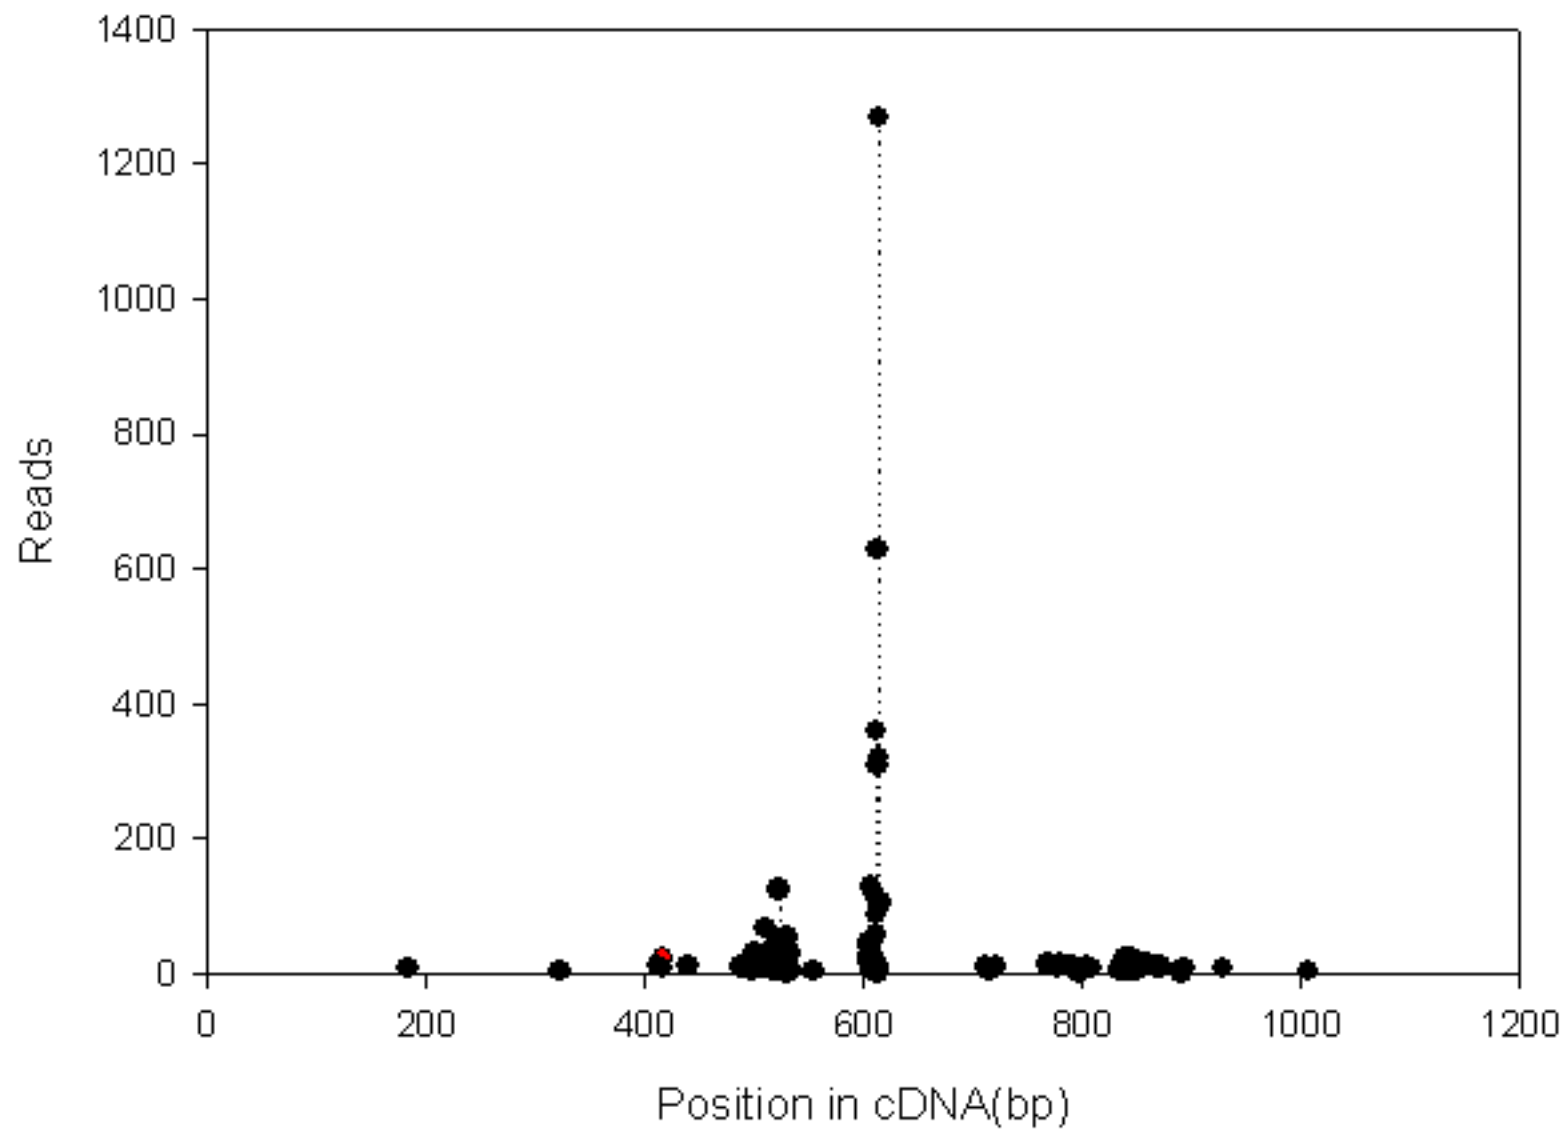

```

5' UGACCGUGAUUUCUCUGUCCAAGCAG 3'      Cs1g09665.1
   ::::::::::::::::::::
3' ACUGGCACUAAAGAGACAGG----- 5'      Csi-miR3954b
  
```

Csi-miR3954b, target=Cs2g29120.1 gene=Cs2g29120  
 Category:1  
 Score=4.5  
 Cleavage Site=941

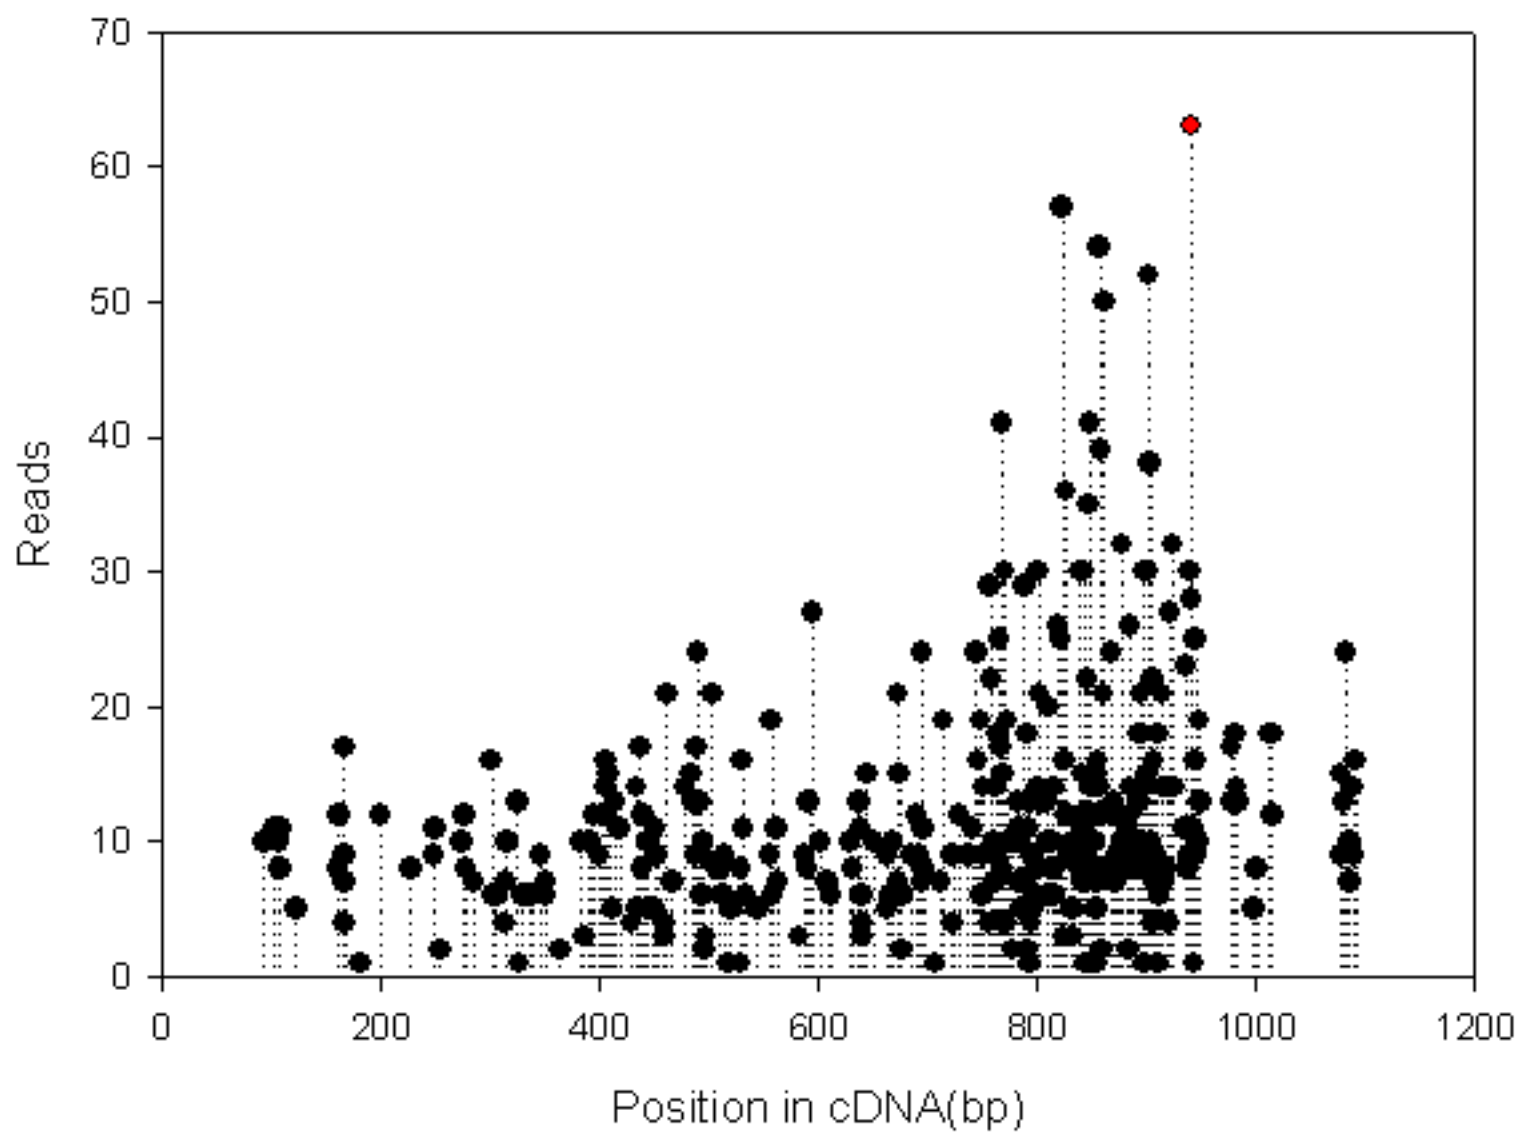

|    |                            |    |              |
|----|----------------------------|----|--------------|
| 5' | CUAAGGACUGUGAUUACUCUGUCAA  | 3' | Cs2g29120.1  |
|    | .....                      |    |              |
| 3' | ----ACUGGCACUAAAGAGACAGG-- | 5' | Csi-miR3954b |

Csi-miR3954b, target=Cs5g04670.1 gene=Cs5g04670  
 Category:3  
 Score=1  
 Cleavage Site=142



```

5' UGACCCUGAUUUCUCUGUCCAAACAA 3'      Cs5g04670.1
   : : : : : : : : : : : : : : : :
3' ACUGGCACUAAAGAGACAGG----- 5'      Csi-miR3954b

```

Csi-miR3954b, target=Cs7g22460.1 gene=Cs7g22460  
 Category:2  
 Score=0  
 Cleavage Site=214



```

5'  UGACCGUGAUUUCUCUGUCCAGCCAA  3'      Cs7g22460.1
      ::::::::::::::::::::
3'  ACUGGCACUAAAGAGACAGG-----  5'      Csi-miR3954b
  
```

Csi-miR396a, target=Cs1g21350.1 gene=Cs1g21350  
 Category:1  
 Score=3  
 Cleavage Site=1164

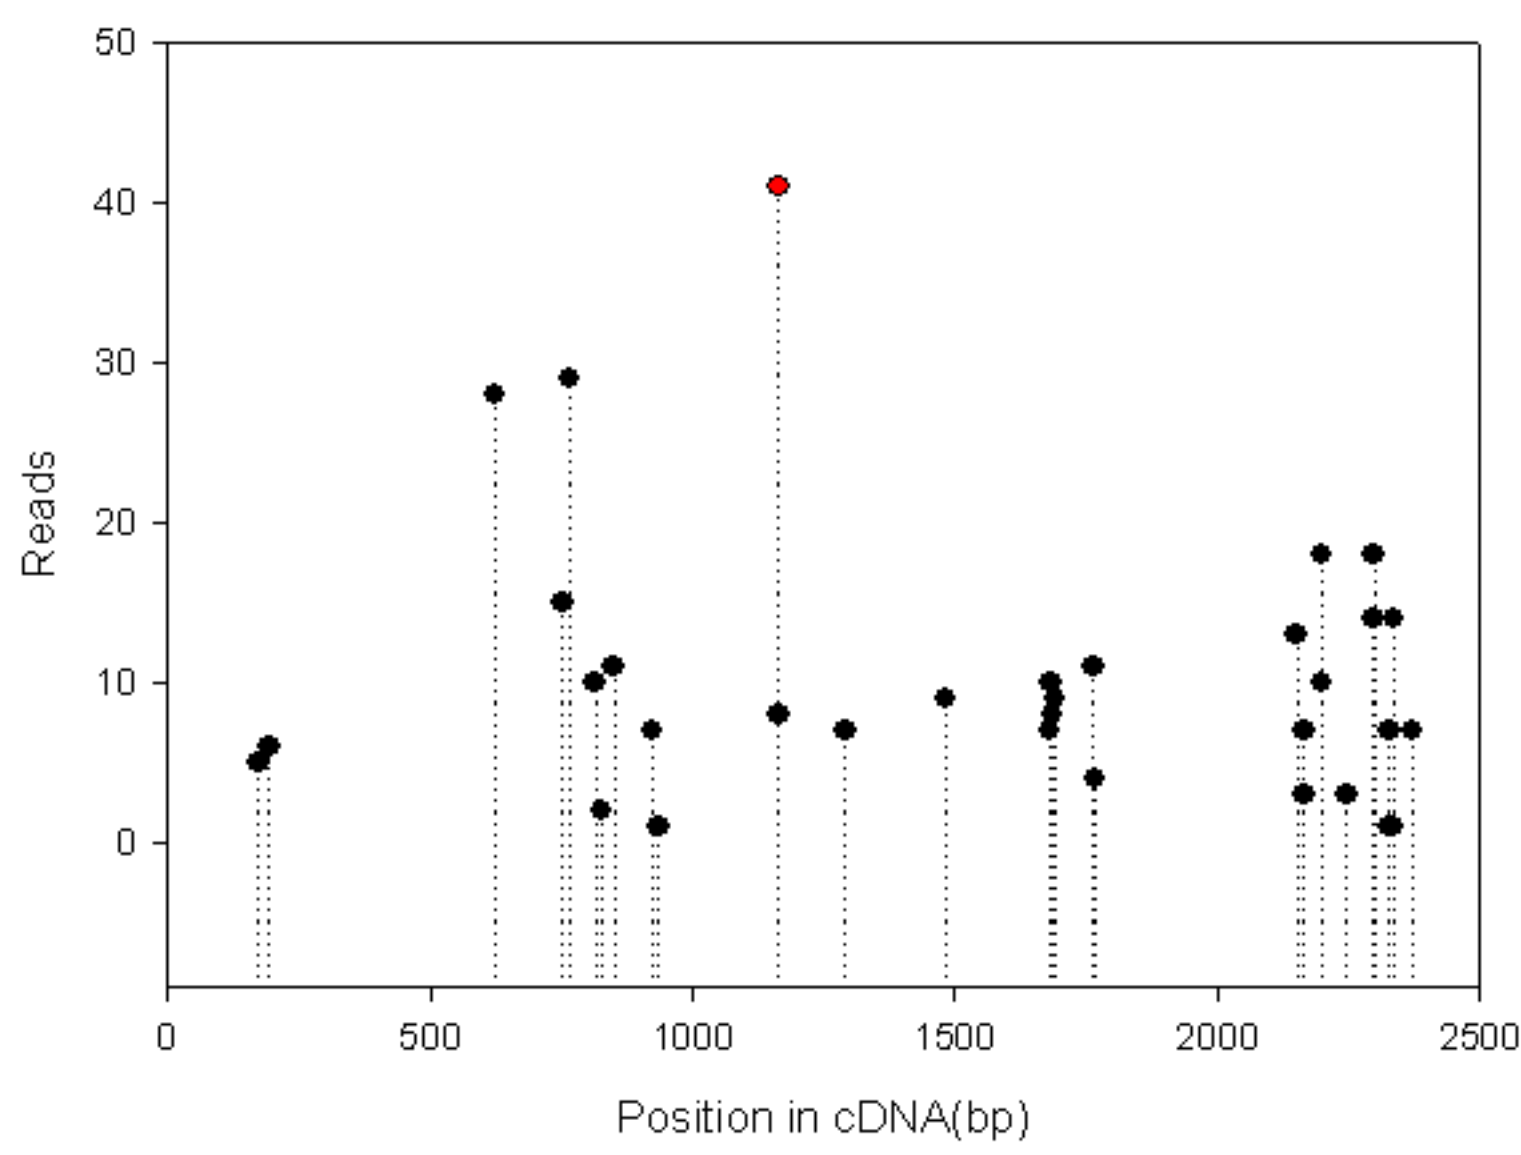

```

5' ACCGUUCAAGAAAGCCUGUGGAAGGC 3'      Cs1g21350.1
   : : : : : : : : : : : : : : : :
3' -GUCAAGUUCUUUC-GACACCUU--- 5'      Csi-miR396a
  
```

Csi-miR396a, target=Cs1g22520.1 gene=Cs1g22520  
 Category:1  
 Score=5  
 Cleavage Site=226

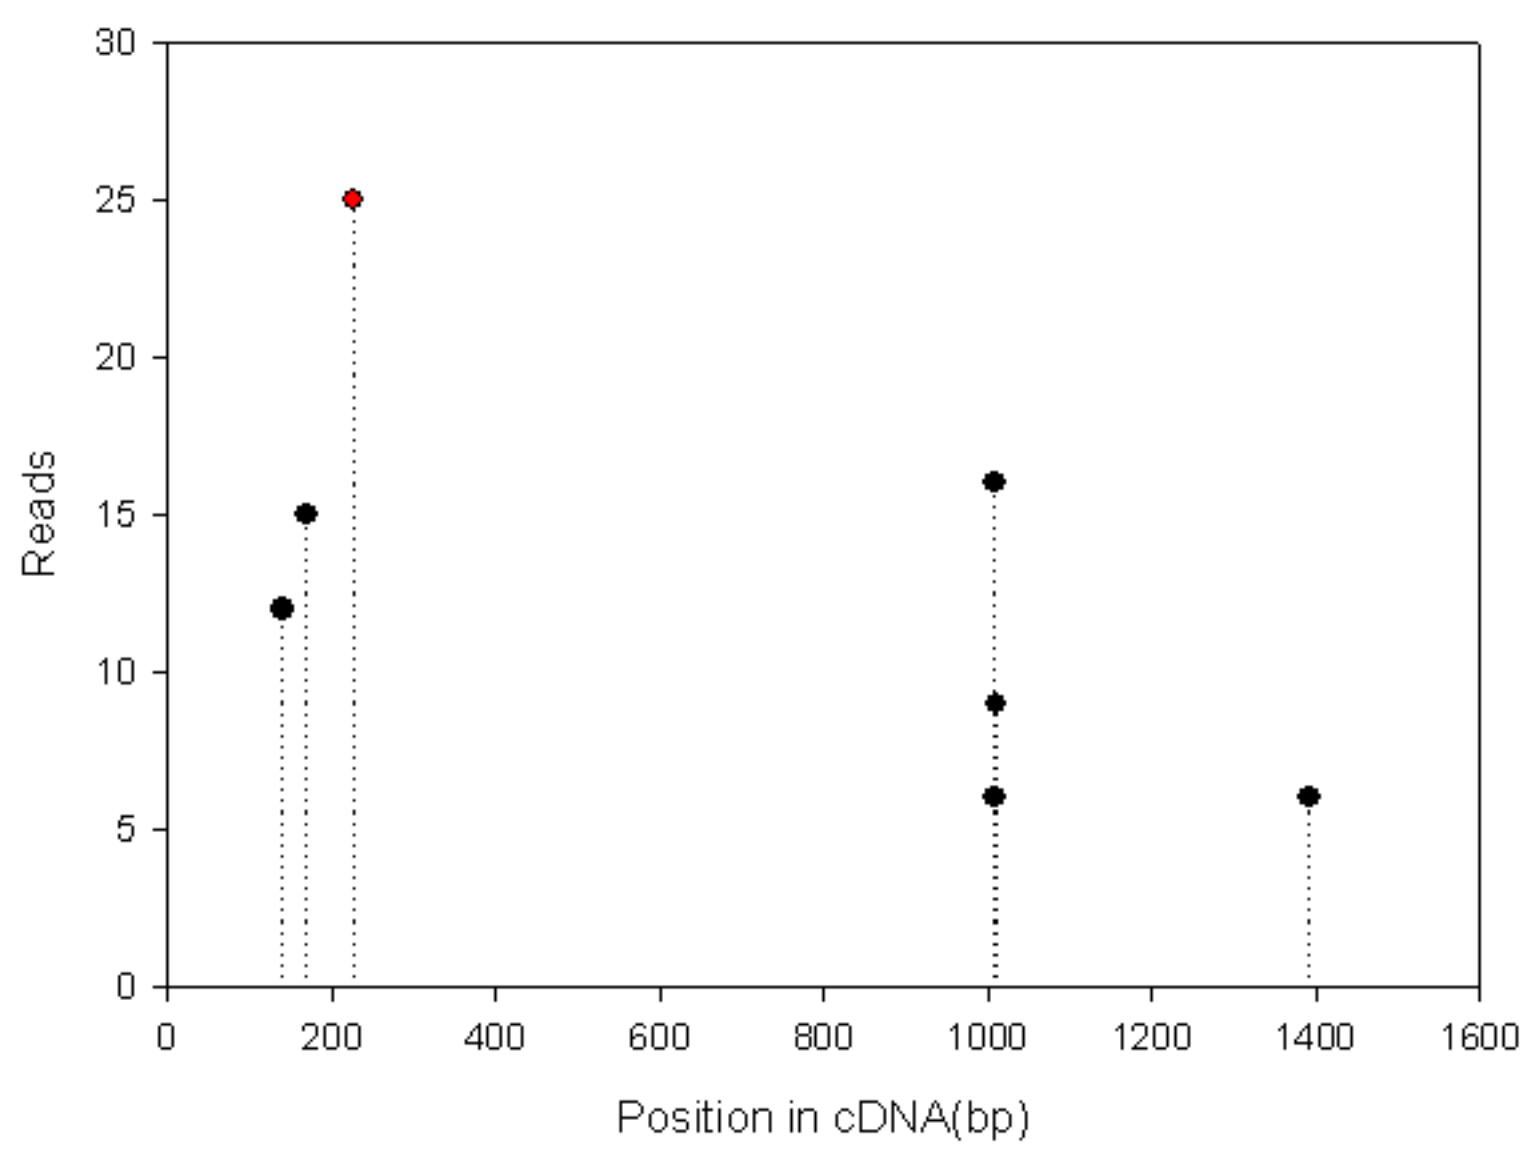

```

5' GAAGUUCAAGAAAUCUGUGGGAAGAA 3'      Cs1g22520.1
   :::::::::::::: :::::::::::
3' -GUCAAGUUCUUUCGACACCUU---- 5'      Csi-miR396a
  
```



Csi-miR396a, target=Cs3g23180.1 gene=Cs3g23180  
 Category:1  
 Score=4  
 Cleavage Site=625

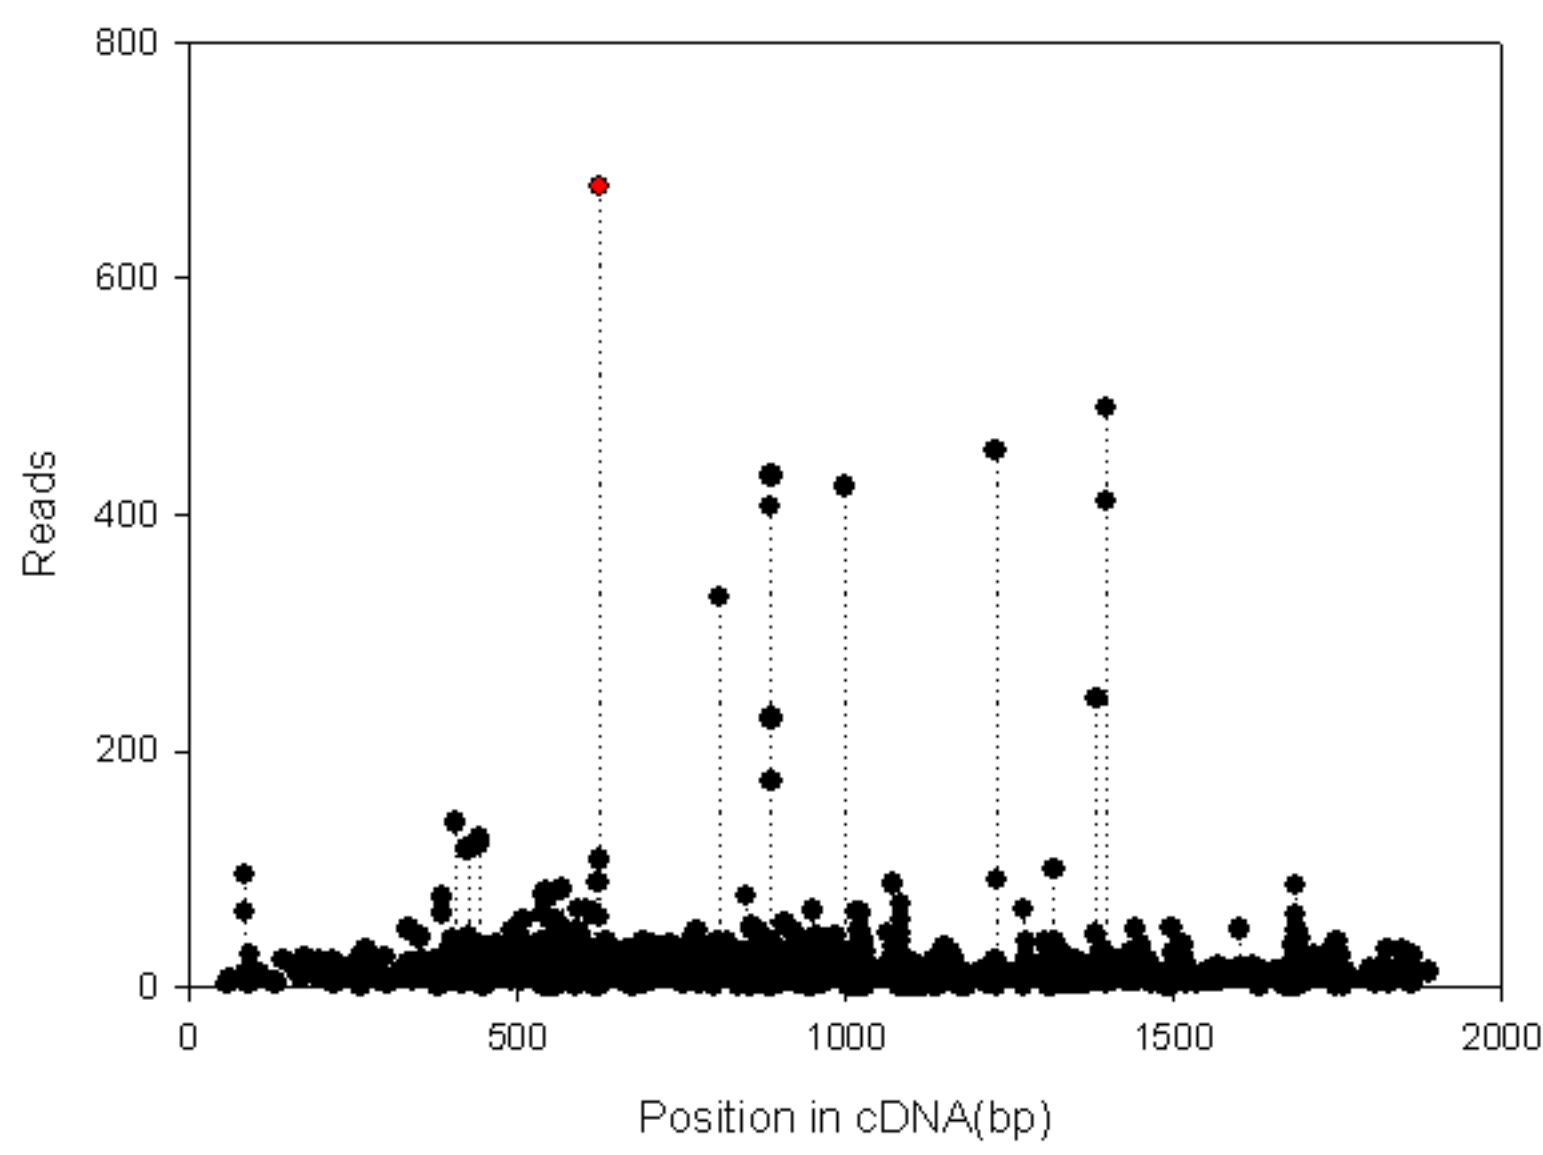

```

5' AAAGAUCAAGGAAGCUGUGGGAGUUG 3'      Cs3g23180.1
   :: :::::::::::::::::::::
3' -GUCAAGUUCUUUCGACACCUU---- 5'      Csi-miR396a
  
```

Csi-miR396a, target=Cs4g05000.1 gene=Cs4g05000  
 Category:3  
 Score=4  
 Cleavage Site=1249

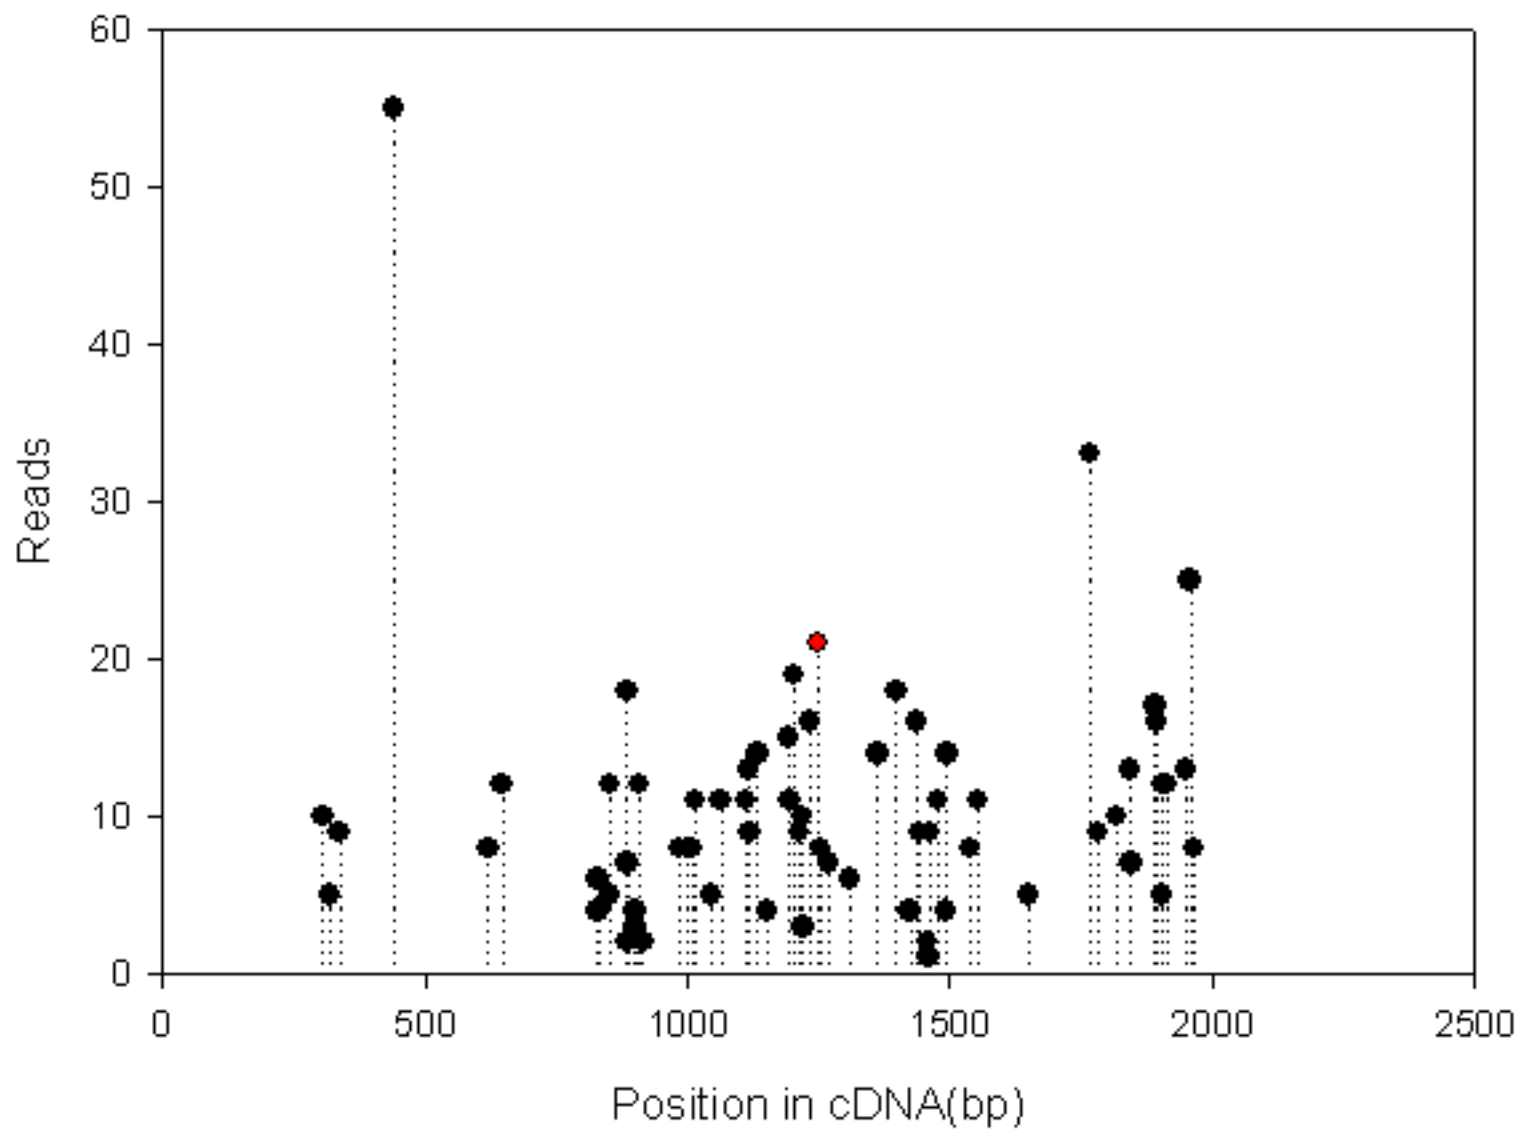

```

5' ACCCUUGAAGAAAGCUGUGGAUUAUAG 3'      Cs4g05000.1
   :  :  :  :  :  :  :  :  :  :  :  :
3' -GUCAAGUUCUUUCGACACCUU----- 5'      Csi-miR396a

```

Csi-miR396a, target=Cs5g01380.1 gene=Cs5g01380  
 Category:1  
 Score=3  
 Cleavage Site=1181

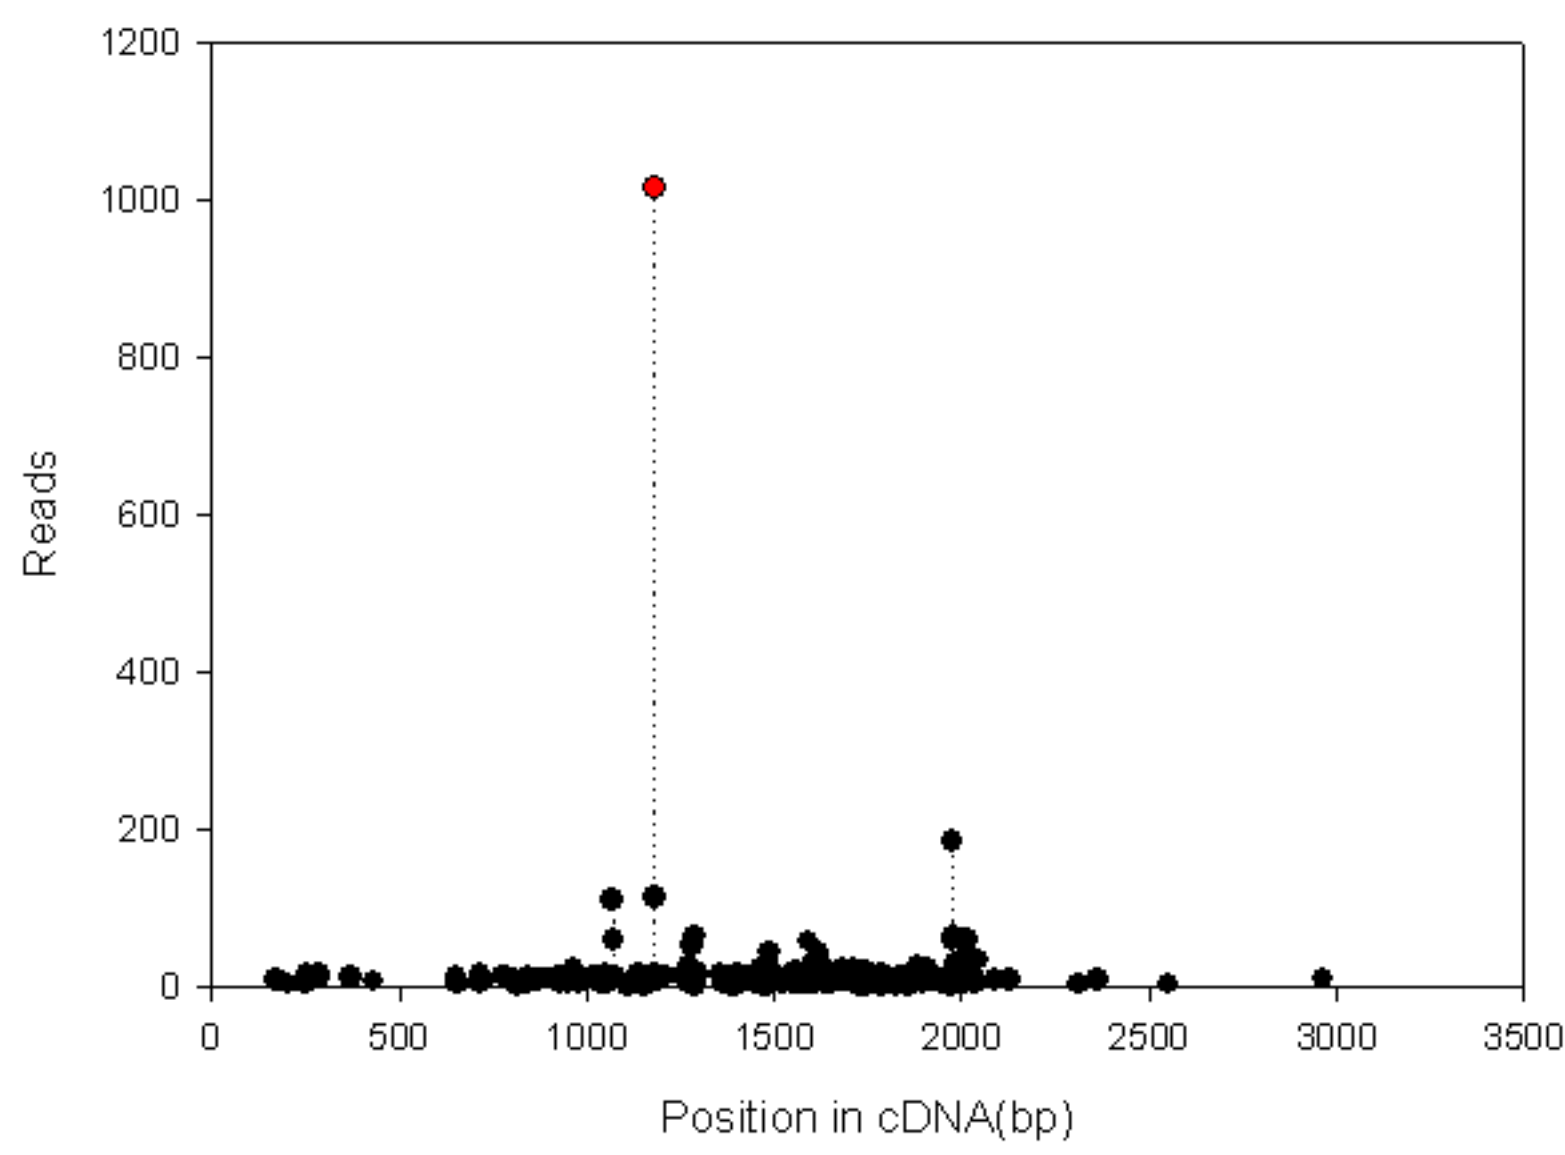

```

5' CCGUUCAAGAAAGCCUGUGGAAUUA 3'      Cs5g01380.1
   : : : : : : : : : : : : : : : :
3' -GUCAAGUUCUUUC-GACACCUU--- 5'      Csi-miR396a
  
```

Csi-miR396a, target=Cs5g09850.1 gene=Cs5g09850  
 Category:3  
 Score=4  
 Cleavage Site=767

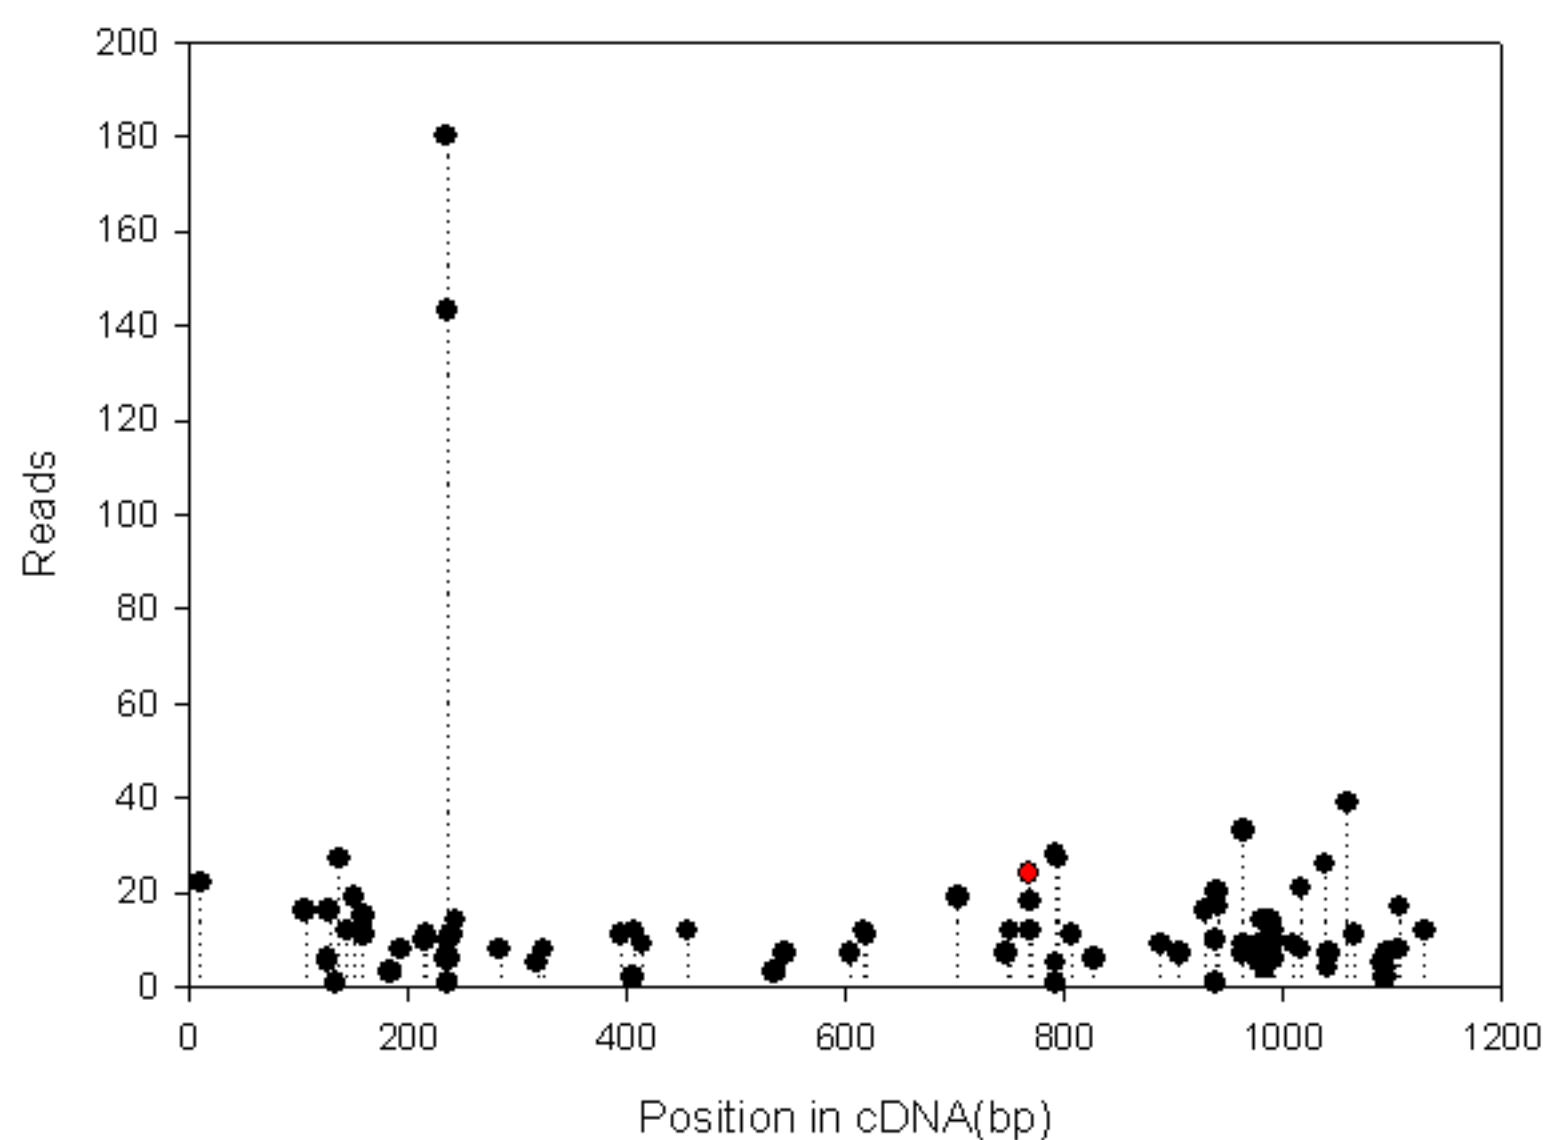

```

5' UGCGUUCAAGAAAGCUUGUGGAAGCU 3'      Cs5g09850.1
   ::::::::::::::: :::::::
3' -GUCAAGUUCUUUCG-ACACCUU--- 5'      Csi-miR396a
  
```

Csi-miR396a, target=Cs7g15220.1 gene=Cs7g15220  
 Category:1  
 Score=3  
 Cleavage Site=377

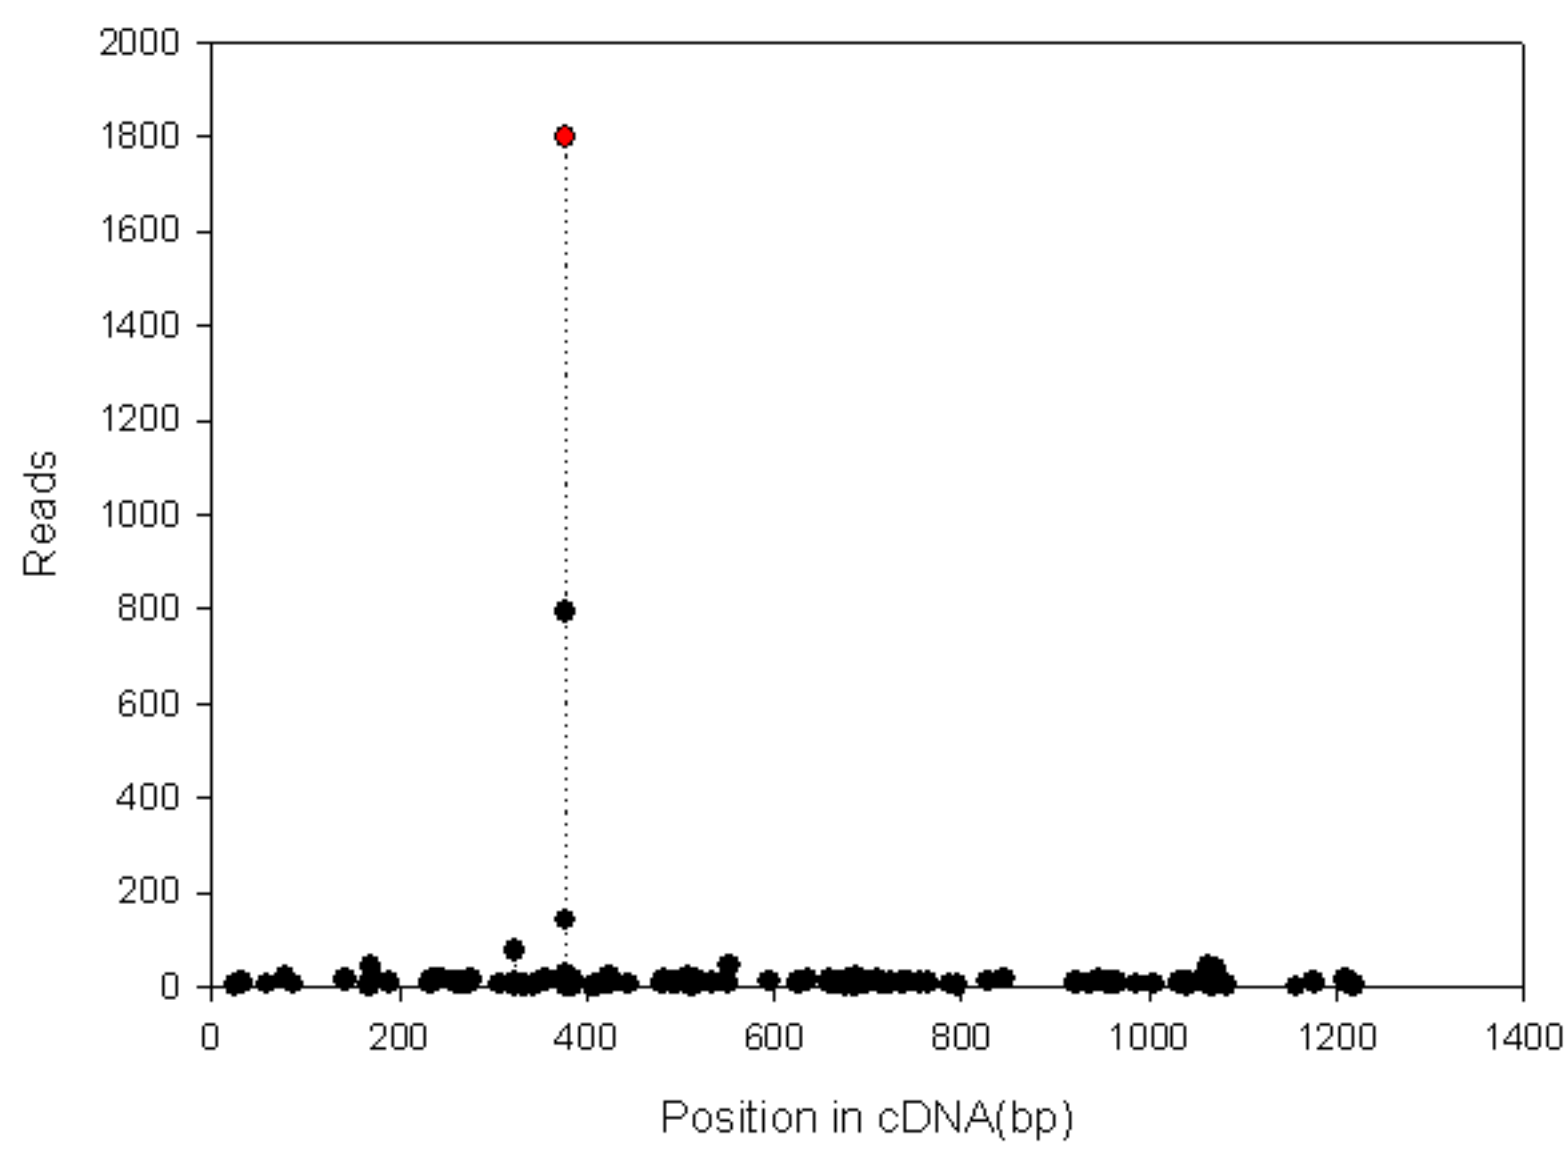

```

5' ACCGUUCAAGAAAGCCUGUGGAAUCA 3'          Cs7g15220.1
   : : : : : : : : : : : : : : : :
3' -GUCAAGUUCUUUC-GACACCUU--- 5'          Csi-miR396a
  
```

Csi-miR396a, target=Cs7g27670.1 gene=Cs7g27670  
 Category:1  
 Score=5  
 Cleavage Site=653

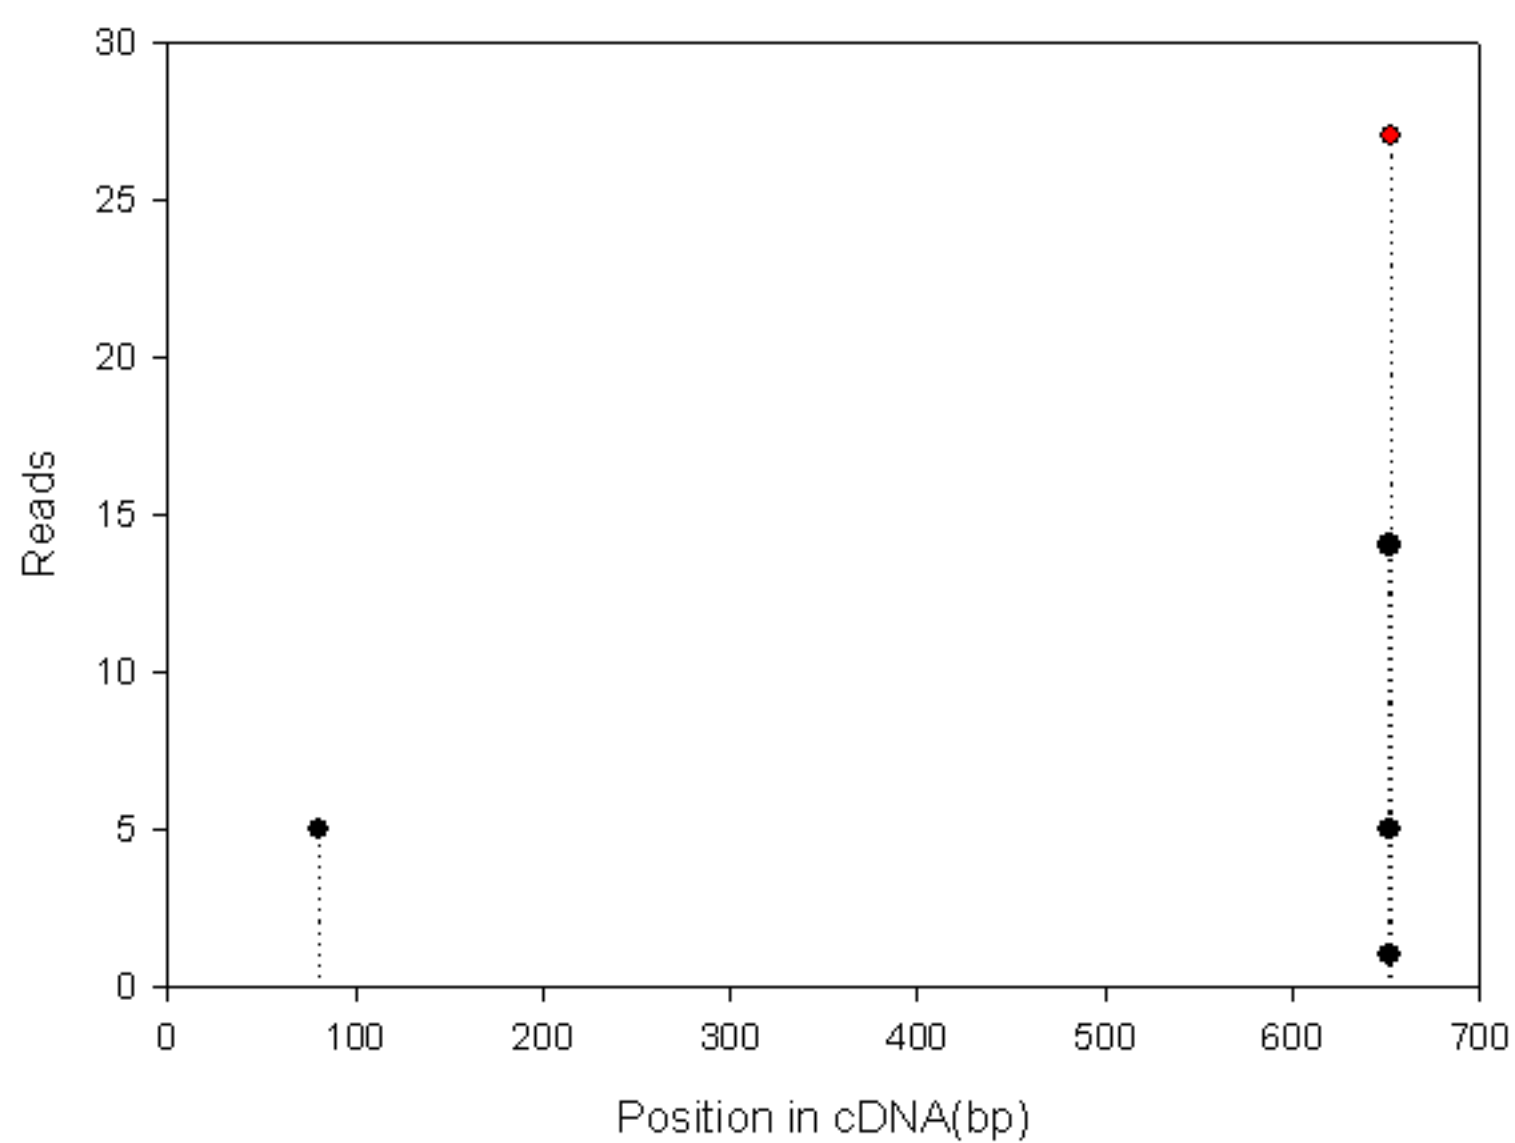

```

5' UCA-UCCAAGAAGGCUAUGGAAUGGAC 3'      Cs7g27670.1
   : : : : : : : : : : : : : : : :
3' -GUCAAGUUCUUUCGACACCUU----- 5'    Csi-miR396a
  
```

Csi-miR396a, target=Cs7g27680.1 gene=Cs7g27680  
 Category:1  
 Score=5  
 Cleavage Site=713

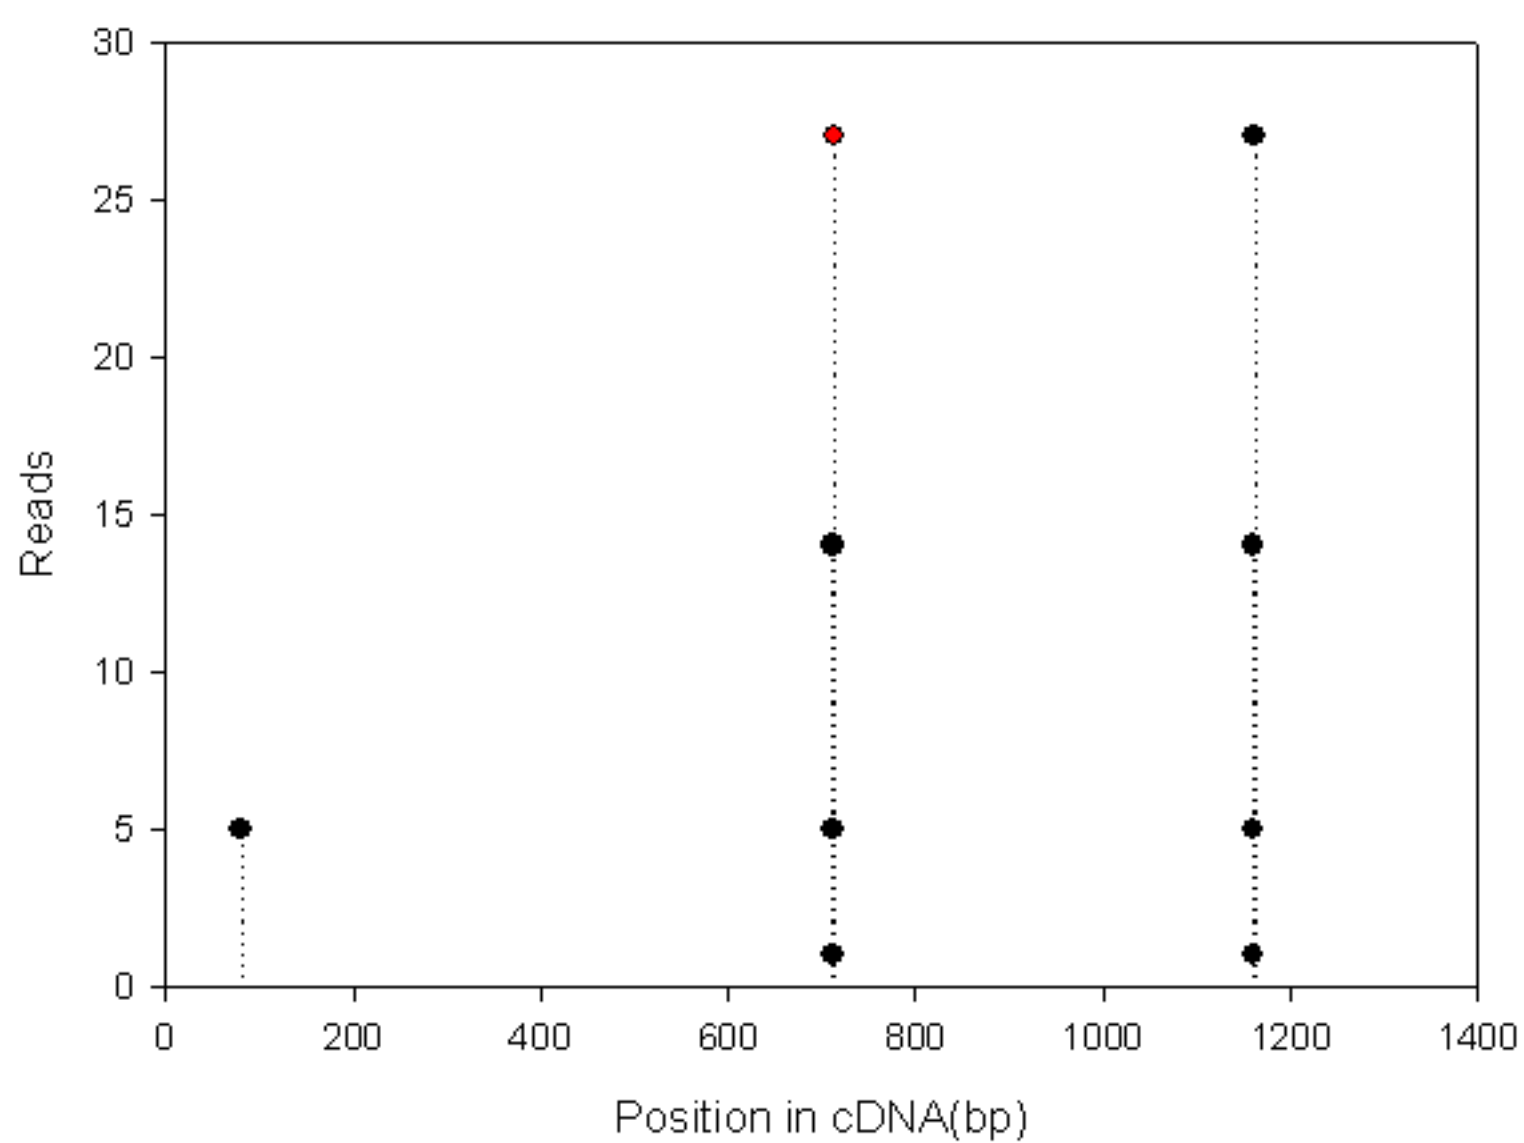

```

5' UCA-UCCAAGAAGGCUAUGGAAUGGAC 3'      Cs7g27680.1
   : : : : : : : : : : : : : : : :
3' -GUCAAGUUCUUUCGACACCUU----- 5'    Csi-miR396a
  
```

Csi-miR396a, target=Orange1.1t00172.1 gene=Orange1.1t00172  
 Category:1  
 Score=3  
 Cleavage Site=656

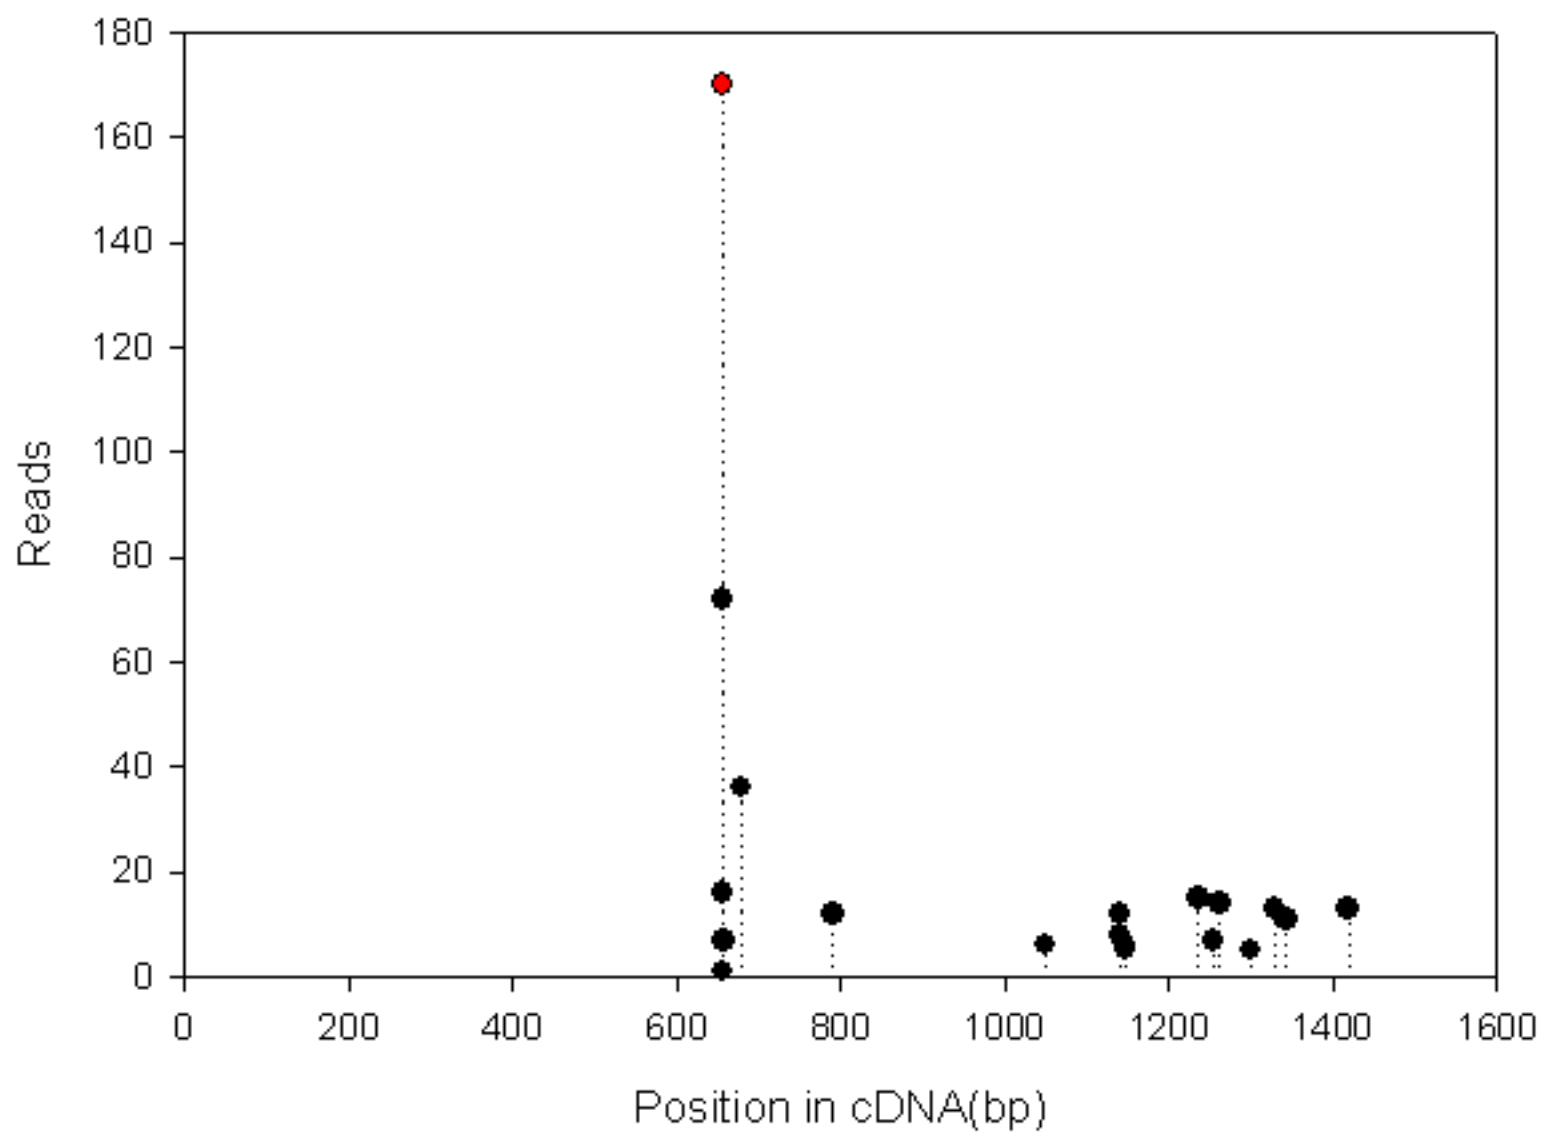

```

5' ACCGUUCAAGAAAGCCUGUGGAACUU 3'      Orange1.1t00172.1
   : : : : : : : : : : : : : : : :
3' -GUCAAGUUCUUUC-GACACCUU--- 5'      Csi-miR396a
  
```



Csi-miR396a, target=Orange1.1t03122.1 gene=Orange1.1t03122  
 Category:1  
 Score=3  
 Cleavage Site=583

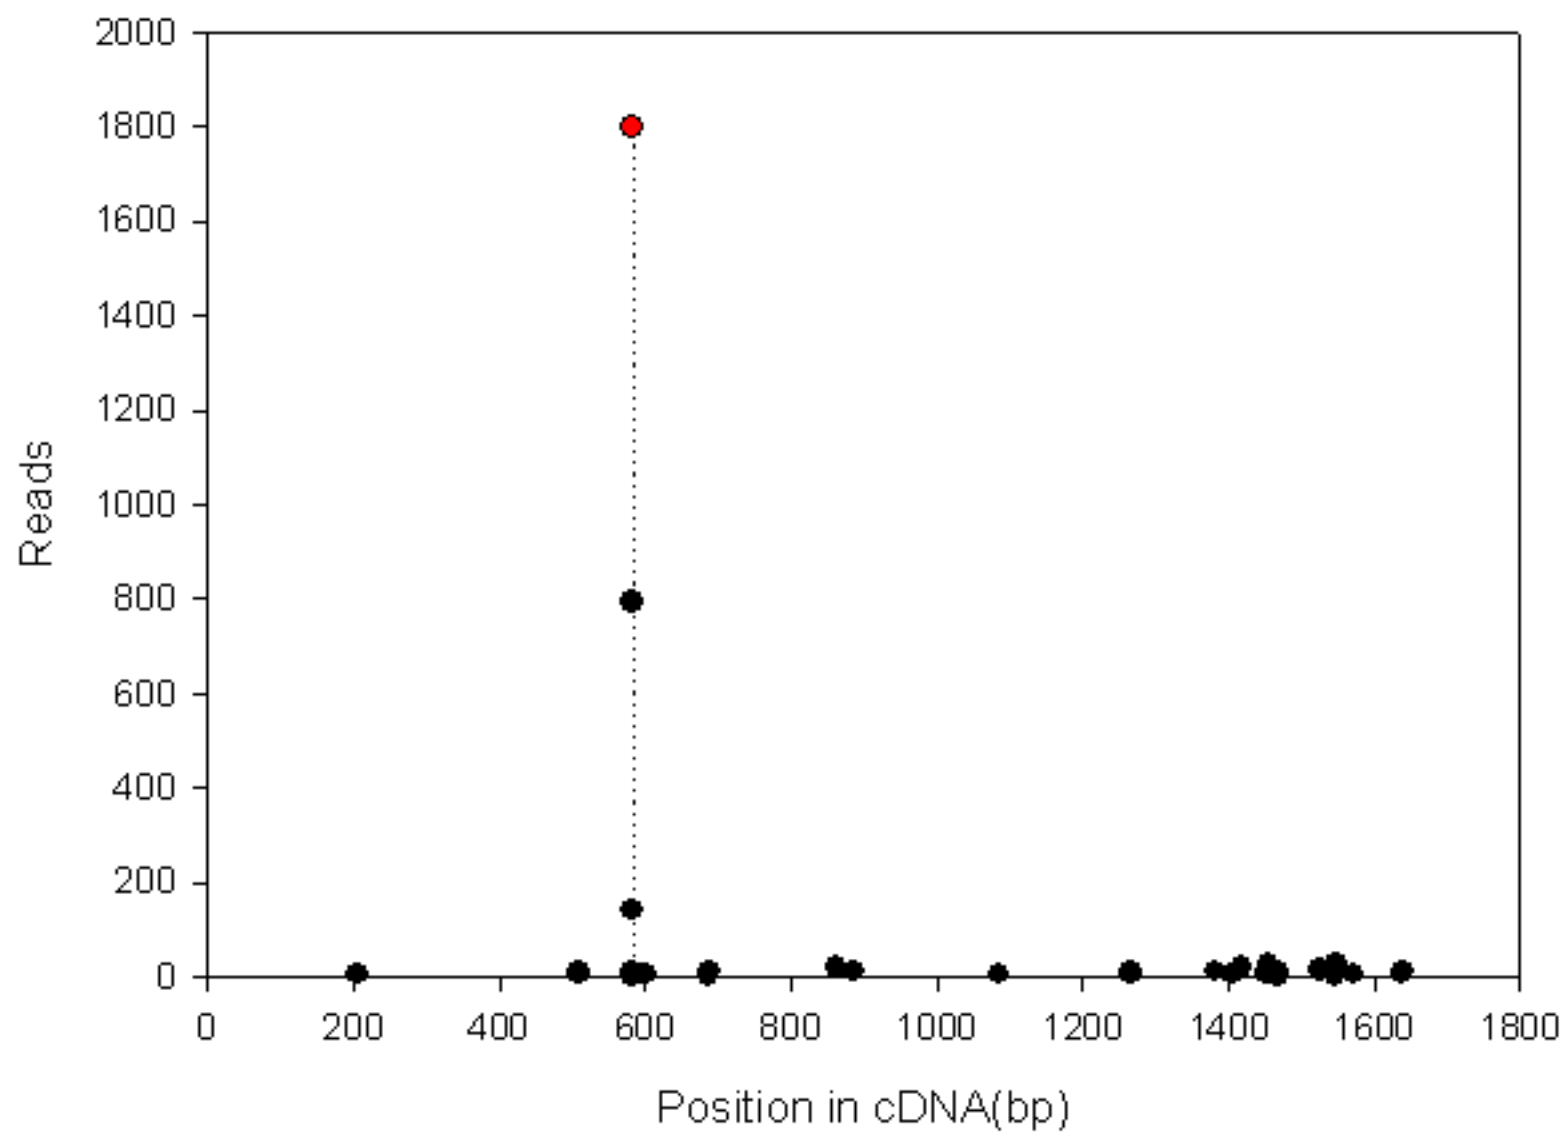

```

5' ACCGUUCAAGAAAGCCUGUGGAAUCA 3'
   : : : : : : : : : : : : : :
3' -GUCAAGUUCUUUC-GACACCUU--- 5'
  
```

Orange1.1t03122.1

Csi-miR396a

Csi-miR396b.1, target=Cs1g21350.1 gene=Cs1g21350  
 Category:1  
 Score=2  
 Cleavage Site=1164

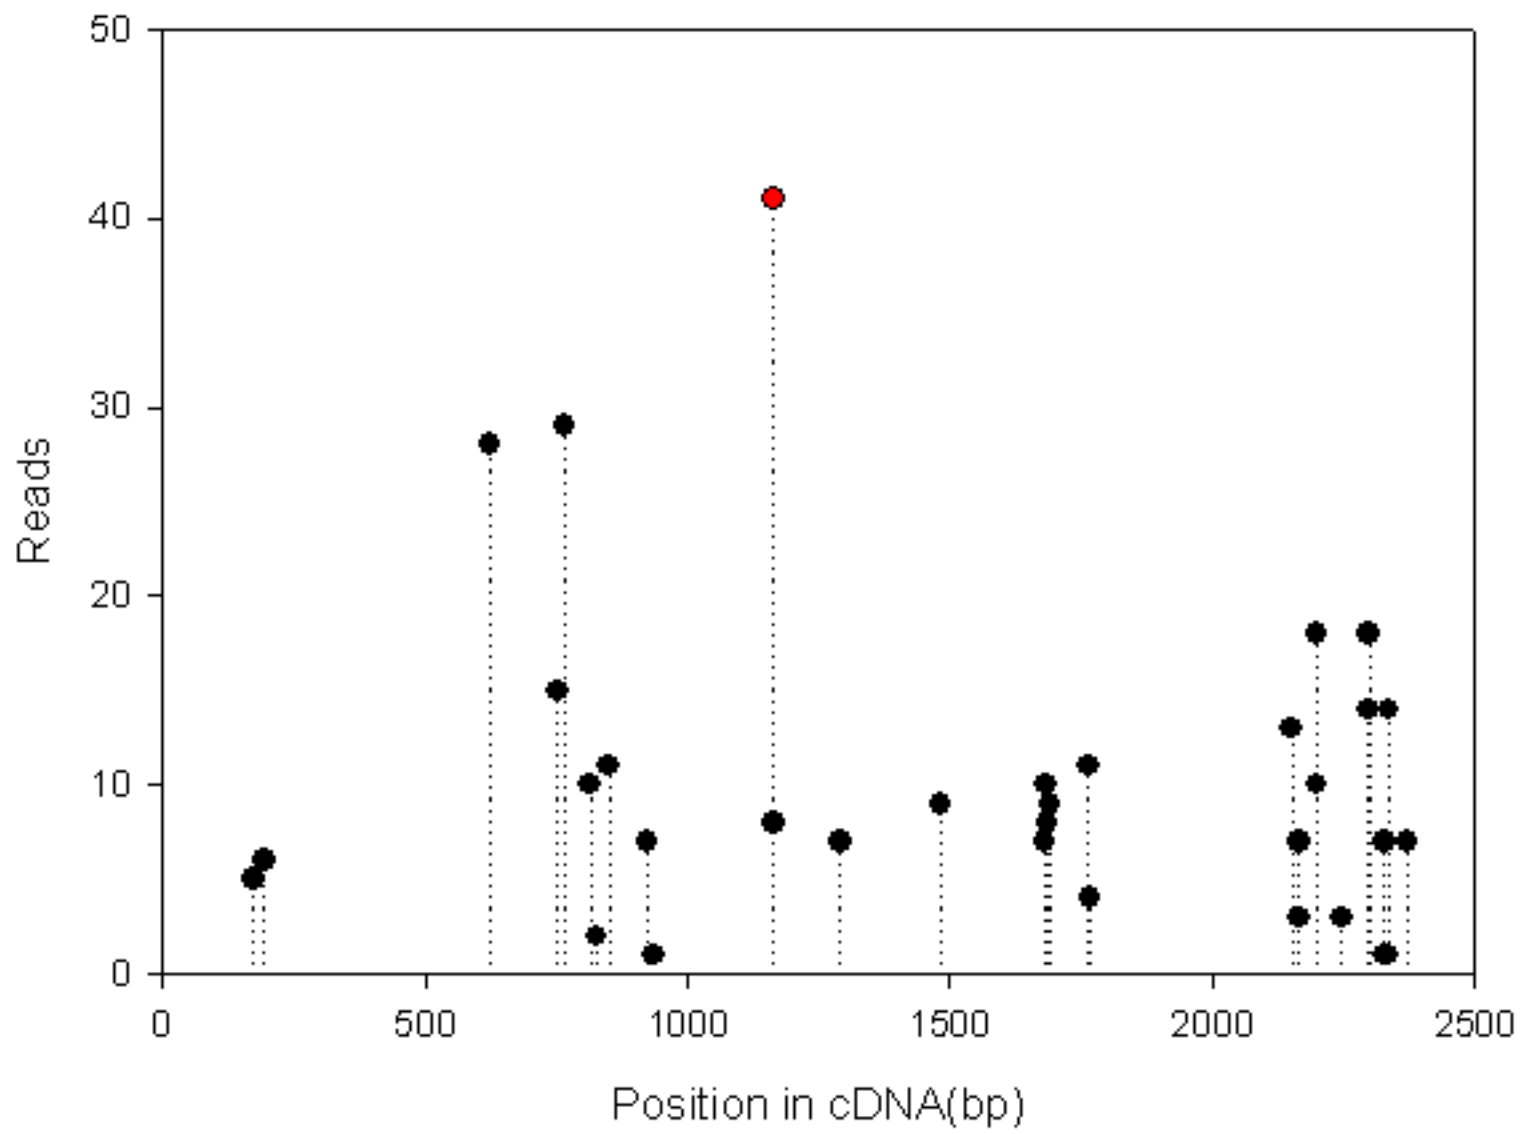

```

5' ACCGUUCAAGAAAGCCUGUGGAAGGC 3'      Cs1g21350.1
      :::::::::::::: ::::::::::::::
3' ---CAAGUUCUUUC-GACACCUU--- 5'      Csi-miR396b.1
  
```

Csi-miR396b.1, target=Cs1g22520.1 gene=Cs1g22520  
 Category:1  
 Score=3  
 Cleavage Site=226

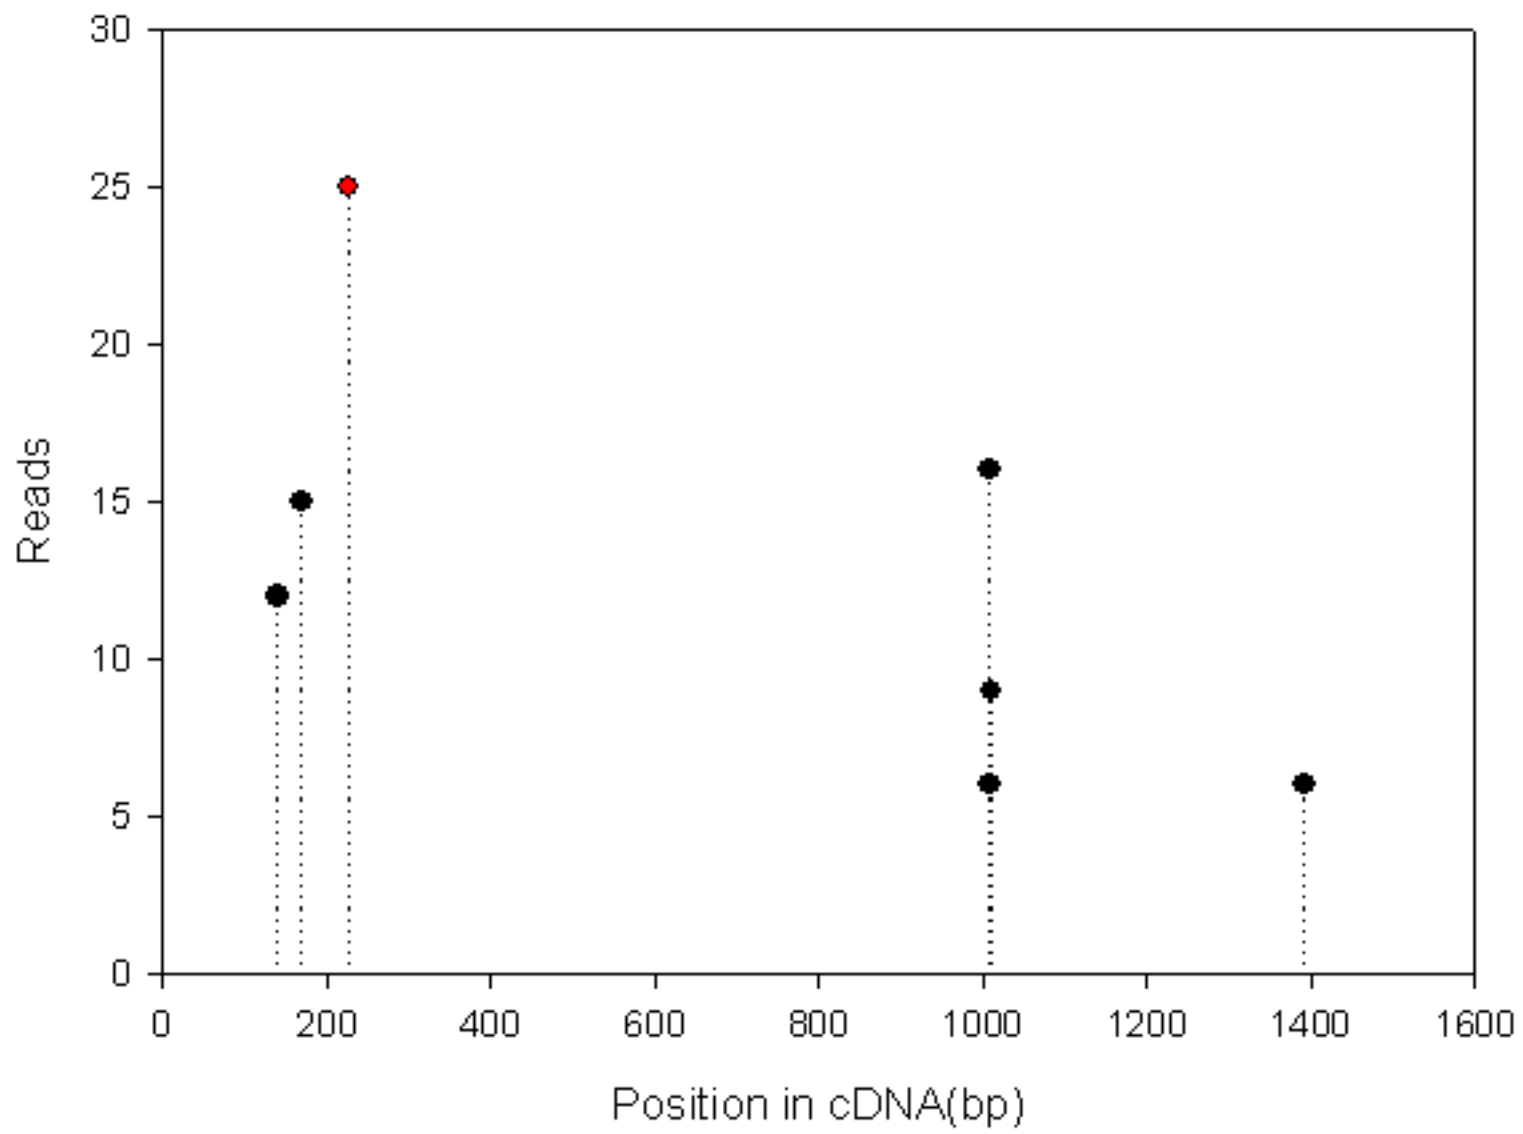

```

5' GAAGUUCAAGAAAUCUGUGGGAAGAA 3'      Cs1g22520.1
   ::::::::::: :::::::::::
3' ---CAAGUUCUUUCGACACCUU---- 5'      Csi-miR396b.1
  
```

Csi-miR396b.1, target=Cs3g23180.1 gene=Cs3g23180  
 Category:1  
 Score=3  
 Cleavage Site=625

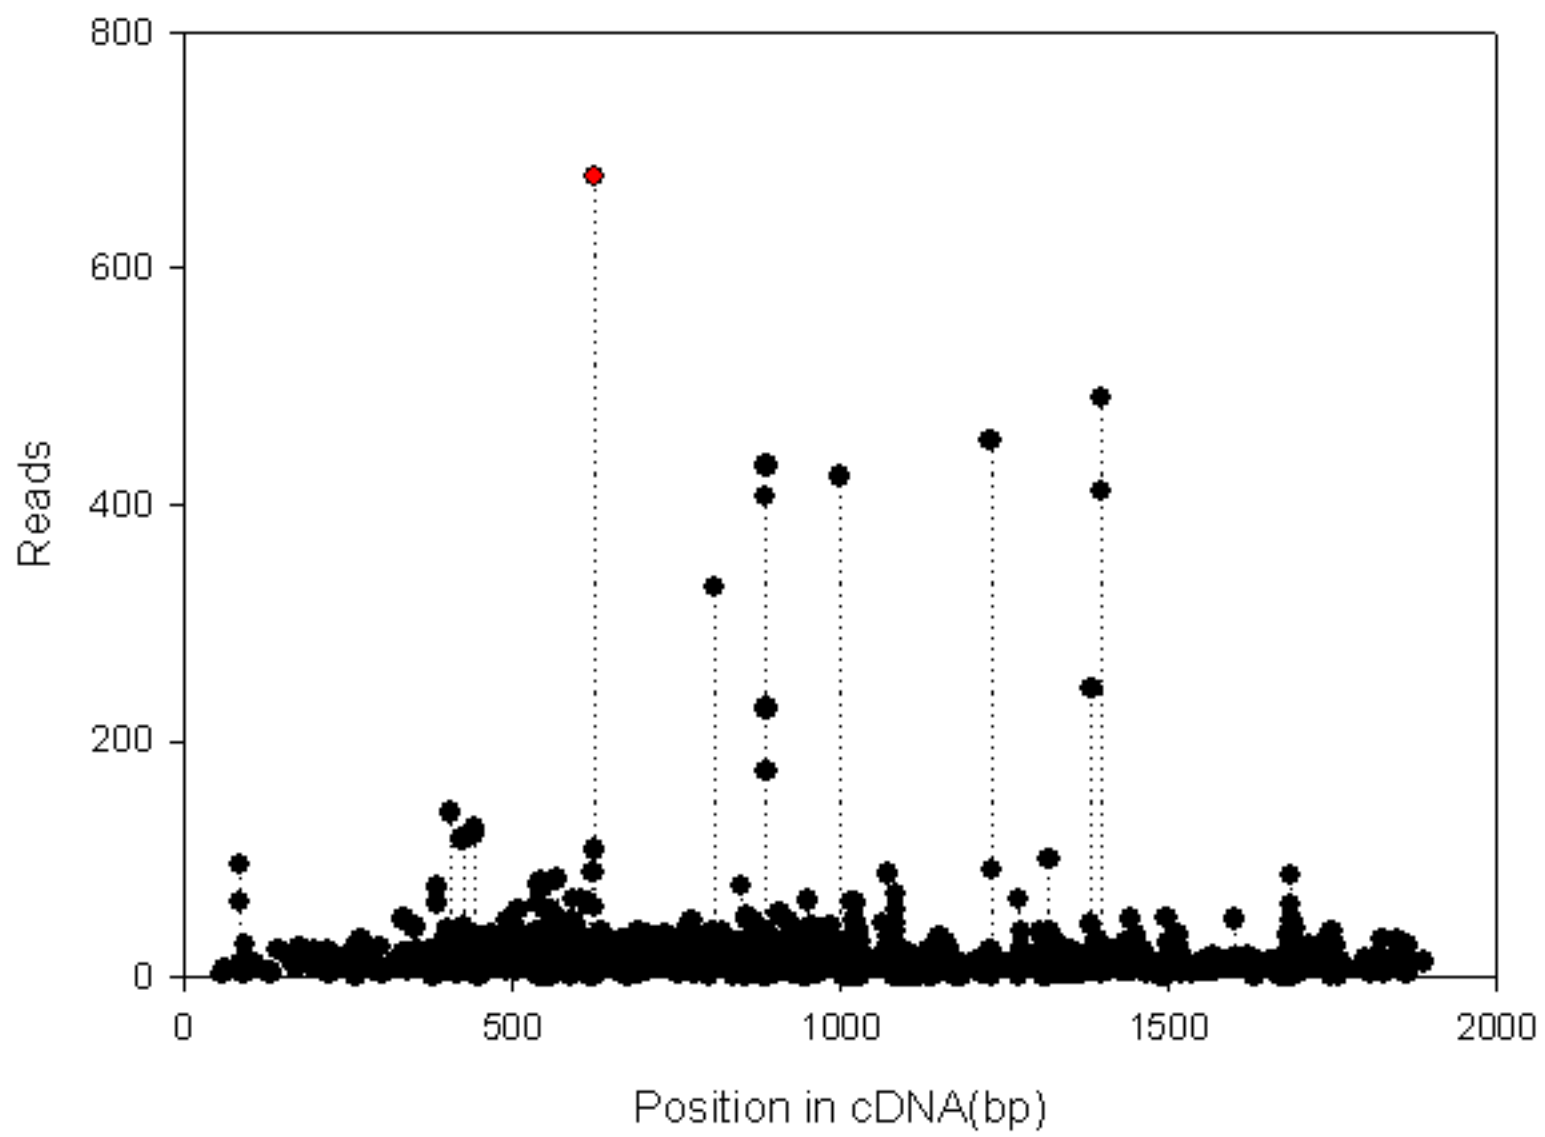

```

5' AAAGAUCAAGGAAGCUGUGGGAGUUG 3'      Cs3g23180.1
   : : : : : : : : : : : : : : : :
3' ---CAAGUUCUUUCGACACCUU---- 5'      Csi-miR396b.1
  
```

Csi-miR396b.1, target=Cs4g05000.1 gene=Cs4g05000  
 Category:3  
 Score=3  
 Cleavage Site=1249



```

5' ACCCUUGAAGAAAGCUGUGGAUUAUAG 3'      Cs4g05000.1
   :: ::::::::::::::::::::
3' ---CAAGUUCUUUCGACACCUU---- 5'      Csi-miR396b.1
  
```

Csi-miR396b.1, target=Cs5g01380.1 gene=Cs5g01380  
 Category:1  
 Score=2  
 Cleavage Site=1181

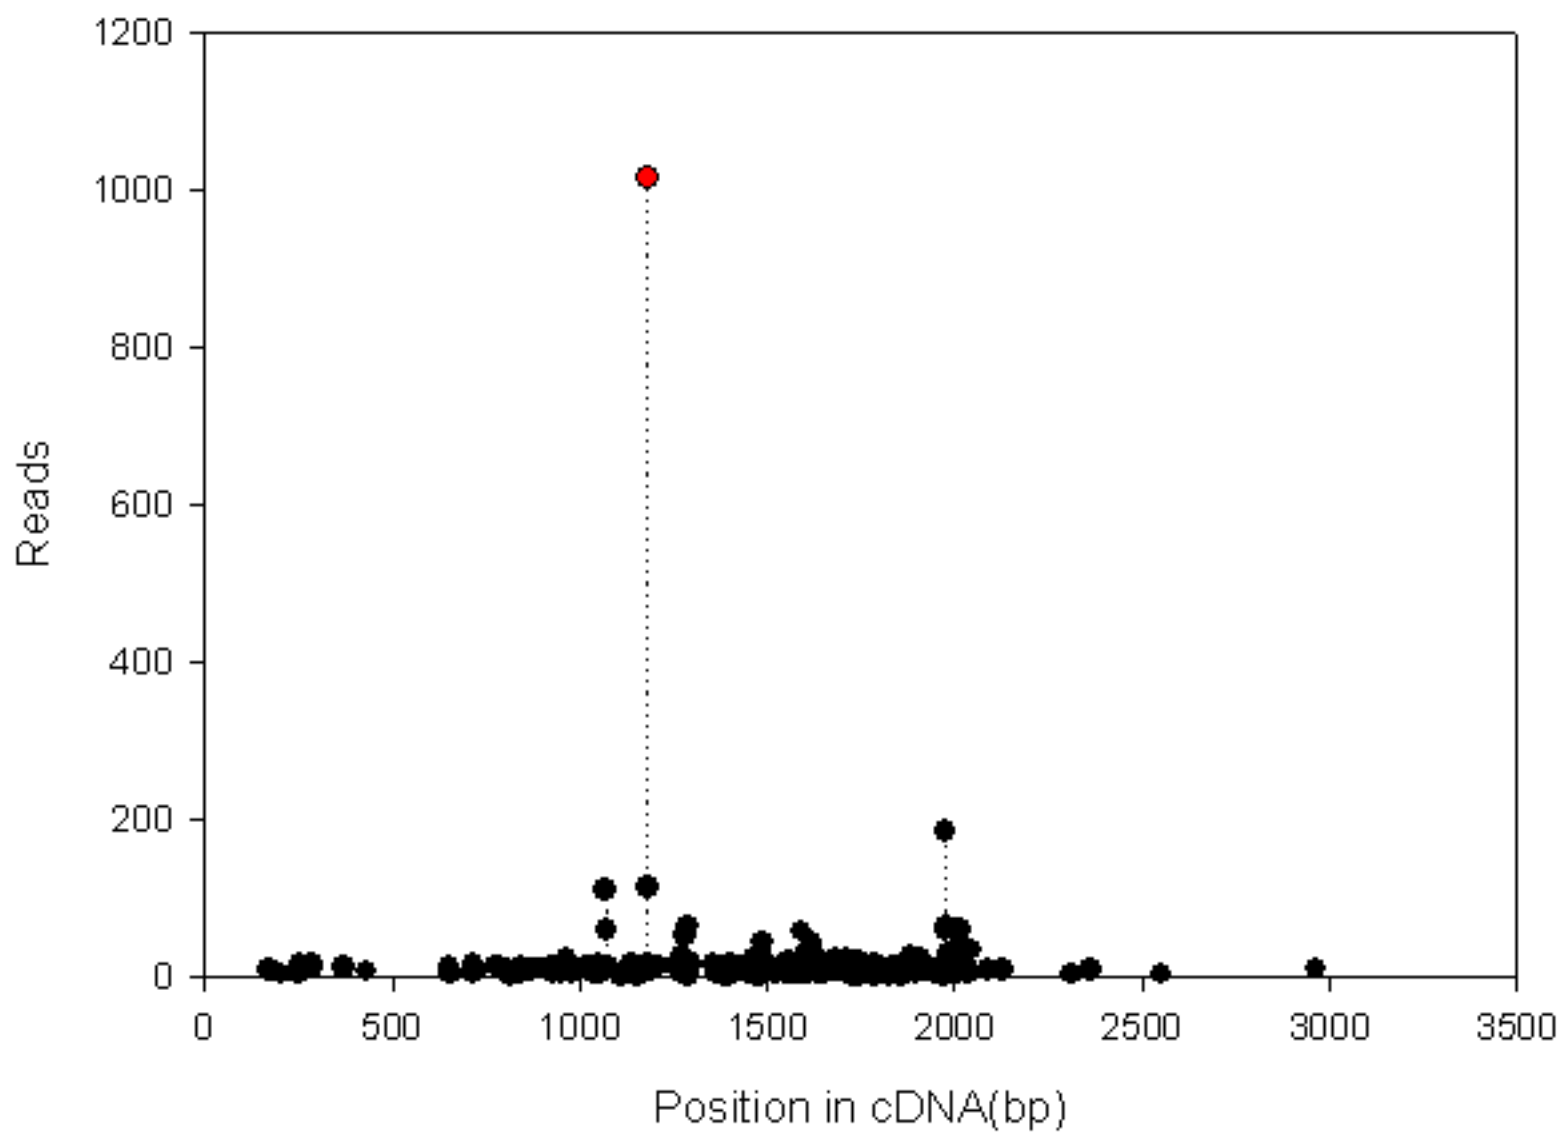

```

5' CCGUUCAAGAAAGCCUGUGGAAUUA 3'      Cs5g01380.1
   : : : : : : : : : : : : : : : :
3' ---CAAGUUCUUUC-GACACCUU--- 5'      Csi-miR396b.1
  
```

Csi-miR396b.1, target=Cs5g06510.1 gene=Cs5g06510  
 Category:3  
 Score=5  
 Cleavage Site=1185

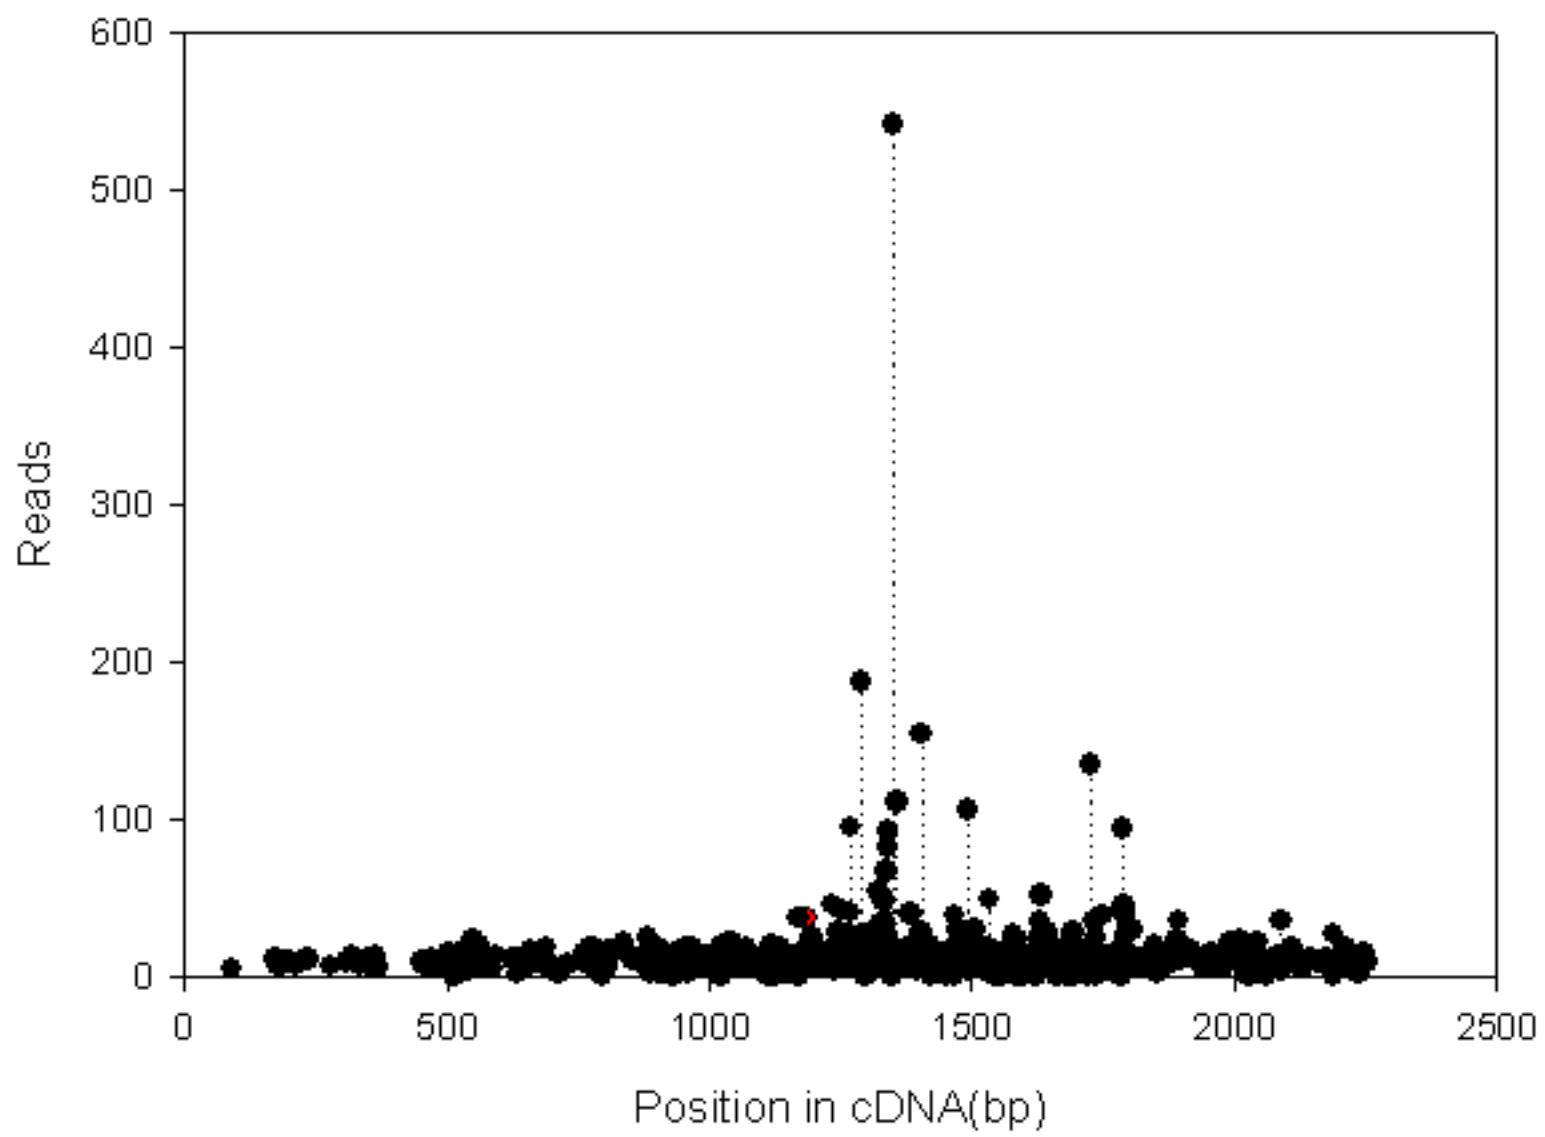

|    |                                     |    |               |
|----|-------------------------------------|----|---------------|
| 5' | UAAUCAAGAAAGCUGAGGACUUAGCU          | 3' | Cs5g06510.1   |
|    | : : : : : : : : : : : : : : : : : : |    |               |
| 3' | -CAAGUUCUUUCGACACCUU-----           | 5' | Csi-miR396b.1 |

Csi-miR396b.1, target=Cs5g09850.1 gene=Cs5g09850  
 Category:3  
 Score=2  
 Cleavage Site=767

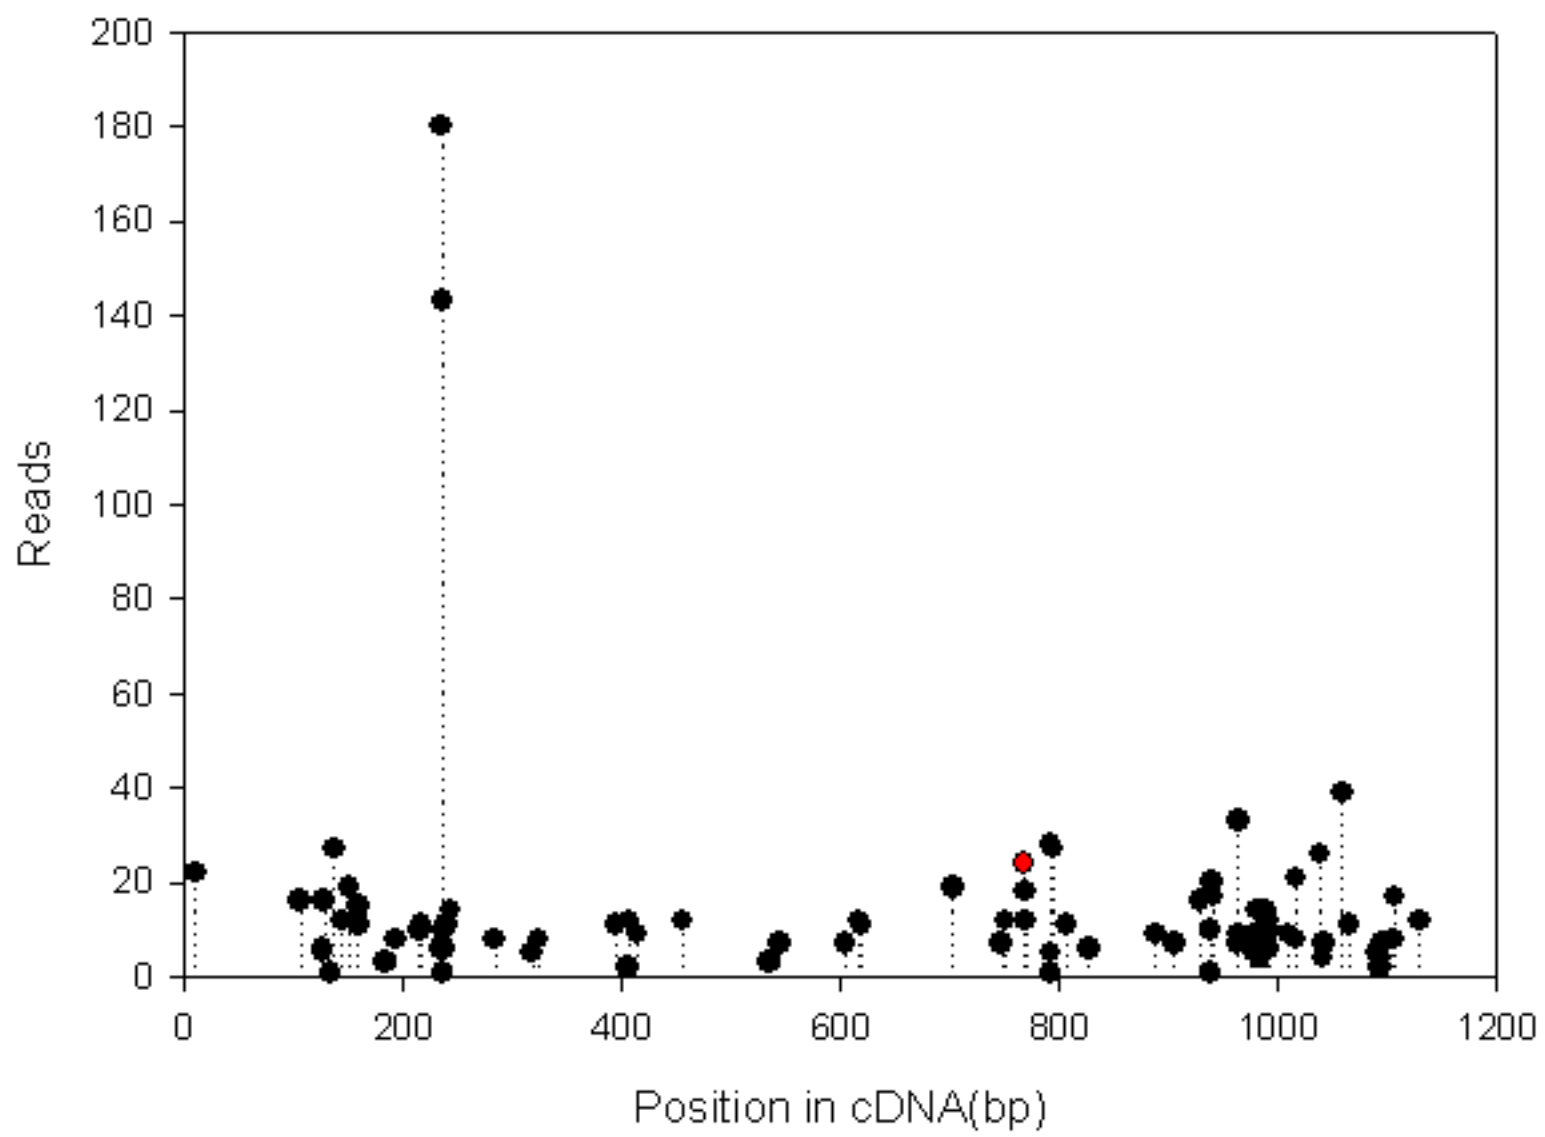

```

5' UGCGUUCAAGAAAGCUUGUGGAAGCU 3'          Cs5g09850.1
   ::::::::::::::: :::::::
3' ---CAAGUUCUUUCG-ACACCUU--- 5'          Csi-miR396b.1
  
```



Csi-miR396b.1, target=Cs5g24150.1 gene=Cs5g24150  
 Category:3  
 Score=5  
 Cleavage Site=3251

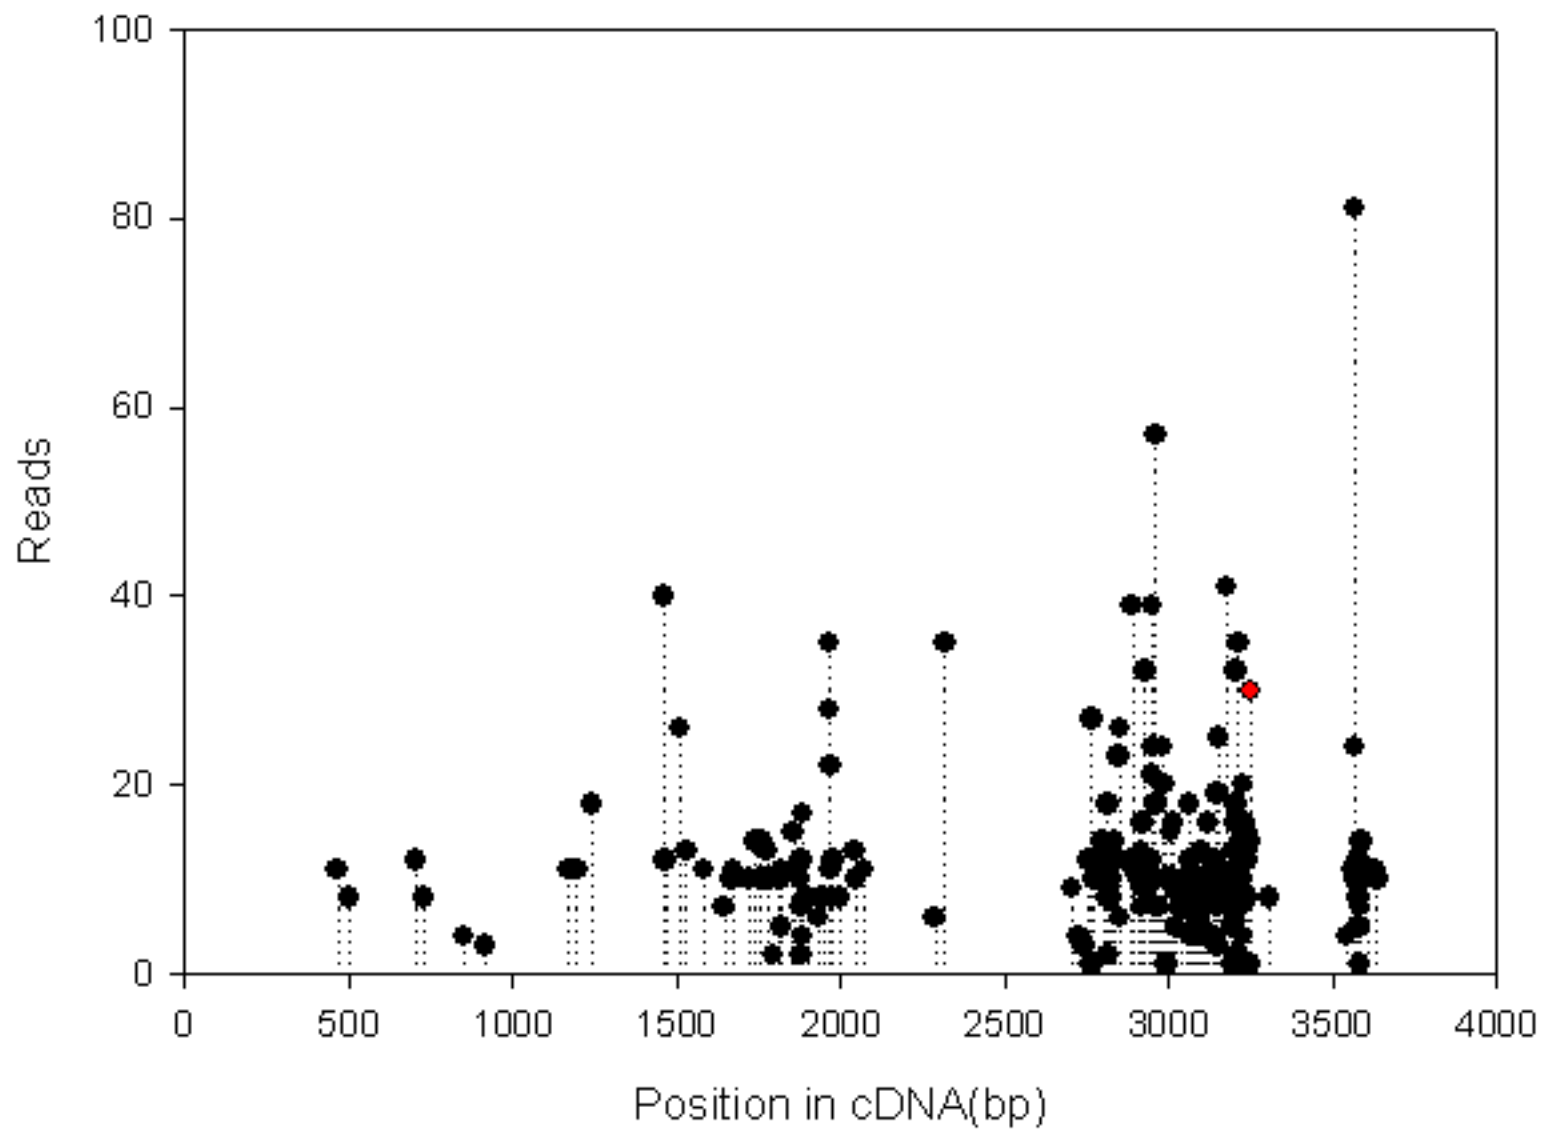

```

5' CGAUCAA-AAAGCUGUAGAAAAUCACA 3'      Cs5g24150.1
   :  :  :  :  :  :  :  :  :  :  :
3' -CAAGUUCUUUGGACACCUU----- 5'      Csi-miR396b.1
  
```

Csi-miR396b.1, target=Cs6g19380.1 gene=Cs6g19380  
 Category:2  
 Score=5  
 Cleavage Site=1152

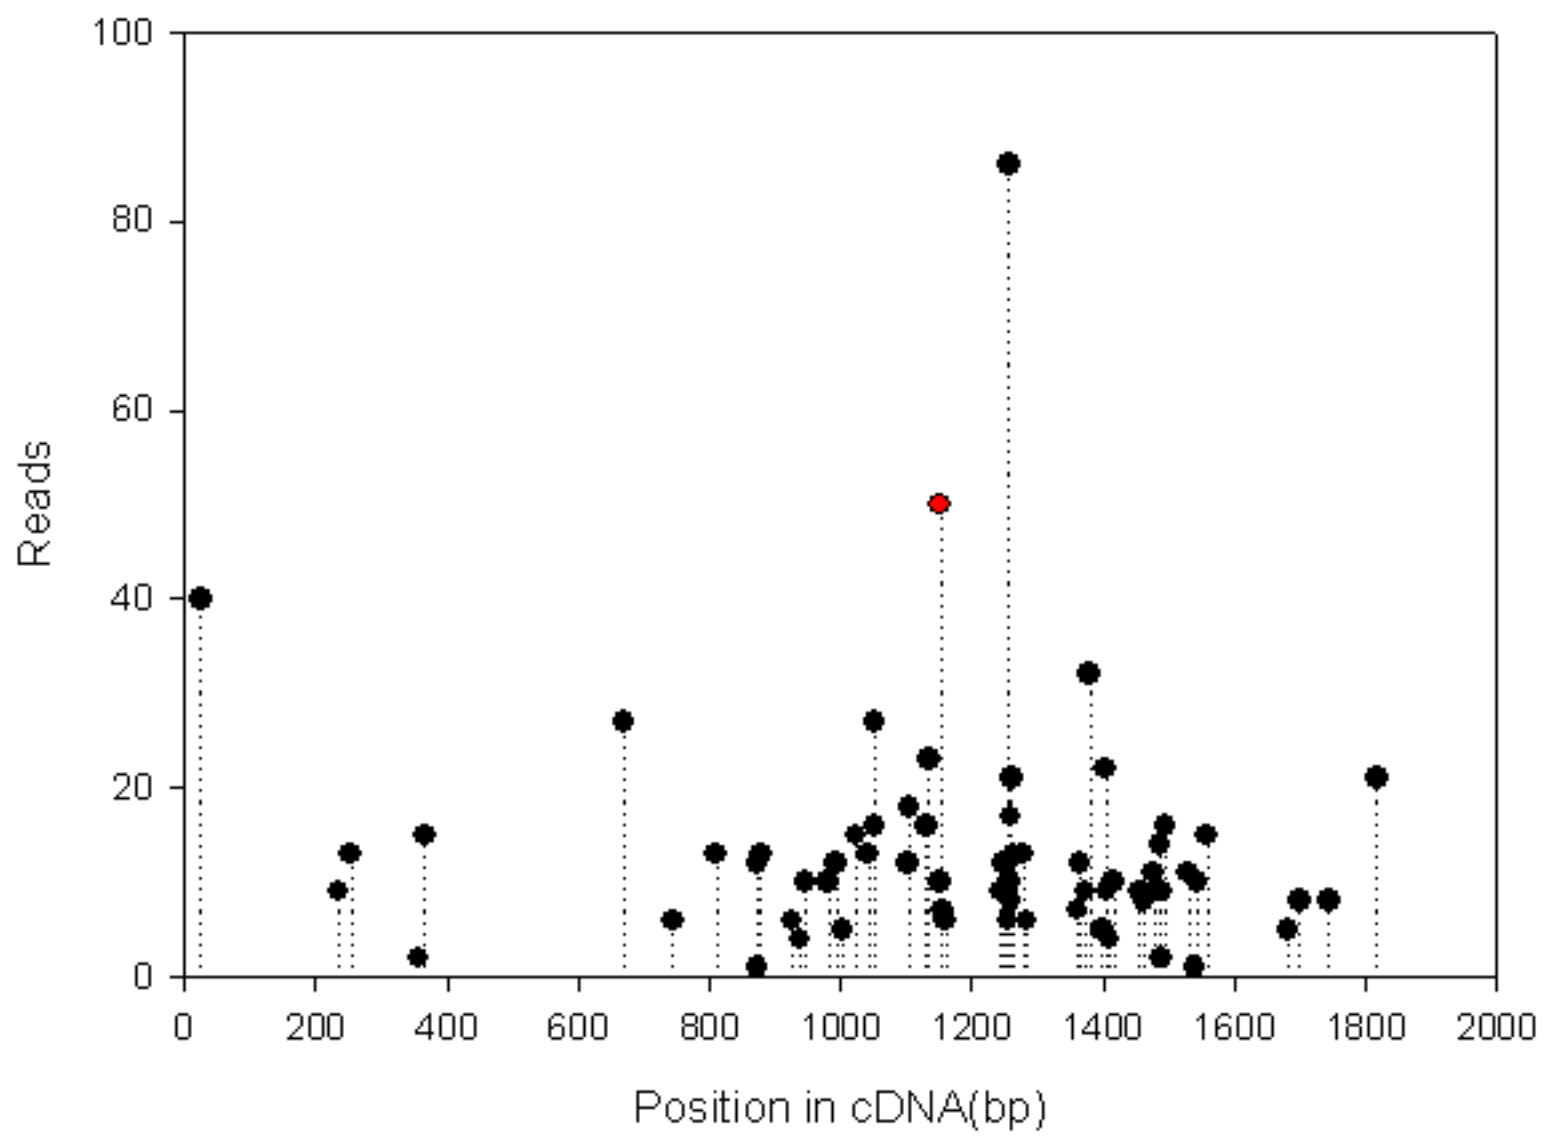

5' CUUUUACUUUUAGAGAAGCUGUGGAA 3'  
 .....  
 3' -----CAAGUUCUUUCGACACCUU 5'

Cs6g19380.1

Csi-miR396b.1

Csi-miR396b.1, target=Cs7g15220.1 gene=Cs7g15220  
 Category:1  
 score=2  
 Cleavage Site=377

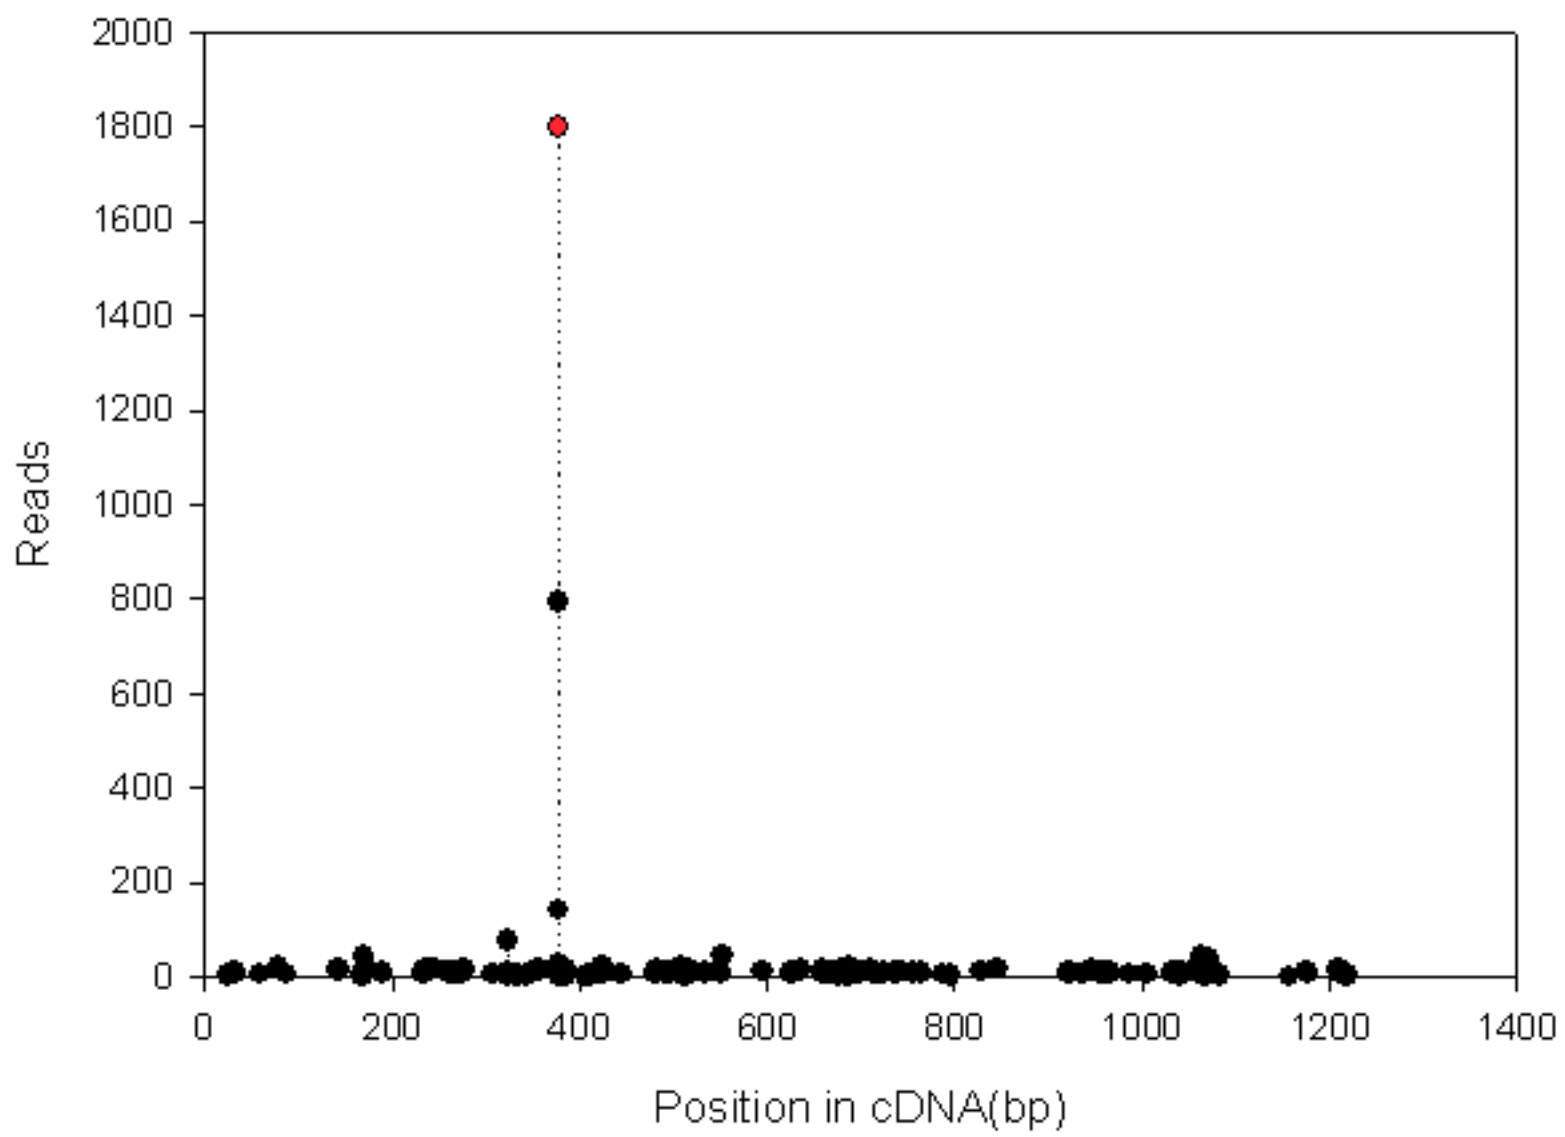

|    |                                     |    |               |
|----|-------------------------------------|----|---------------|
| 5' | ACCGUUCAAGAAAGCCUGUGGAAUCA          | 3' | Cs7g15220.1   |
|    | : : : : : : : : : : : : : : : : : : |    |               |
| 3' | ---CAAGUUCUUUC-GACACCUU---          | 5' | Csi-miR396b.1 |

Csi-miR396b.1, target=Cs7g27670.1 gene=Cs7g27670  
 Category:1  
 Score=5  
 Cleavage Site=653

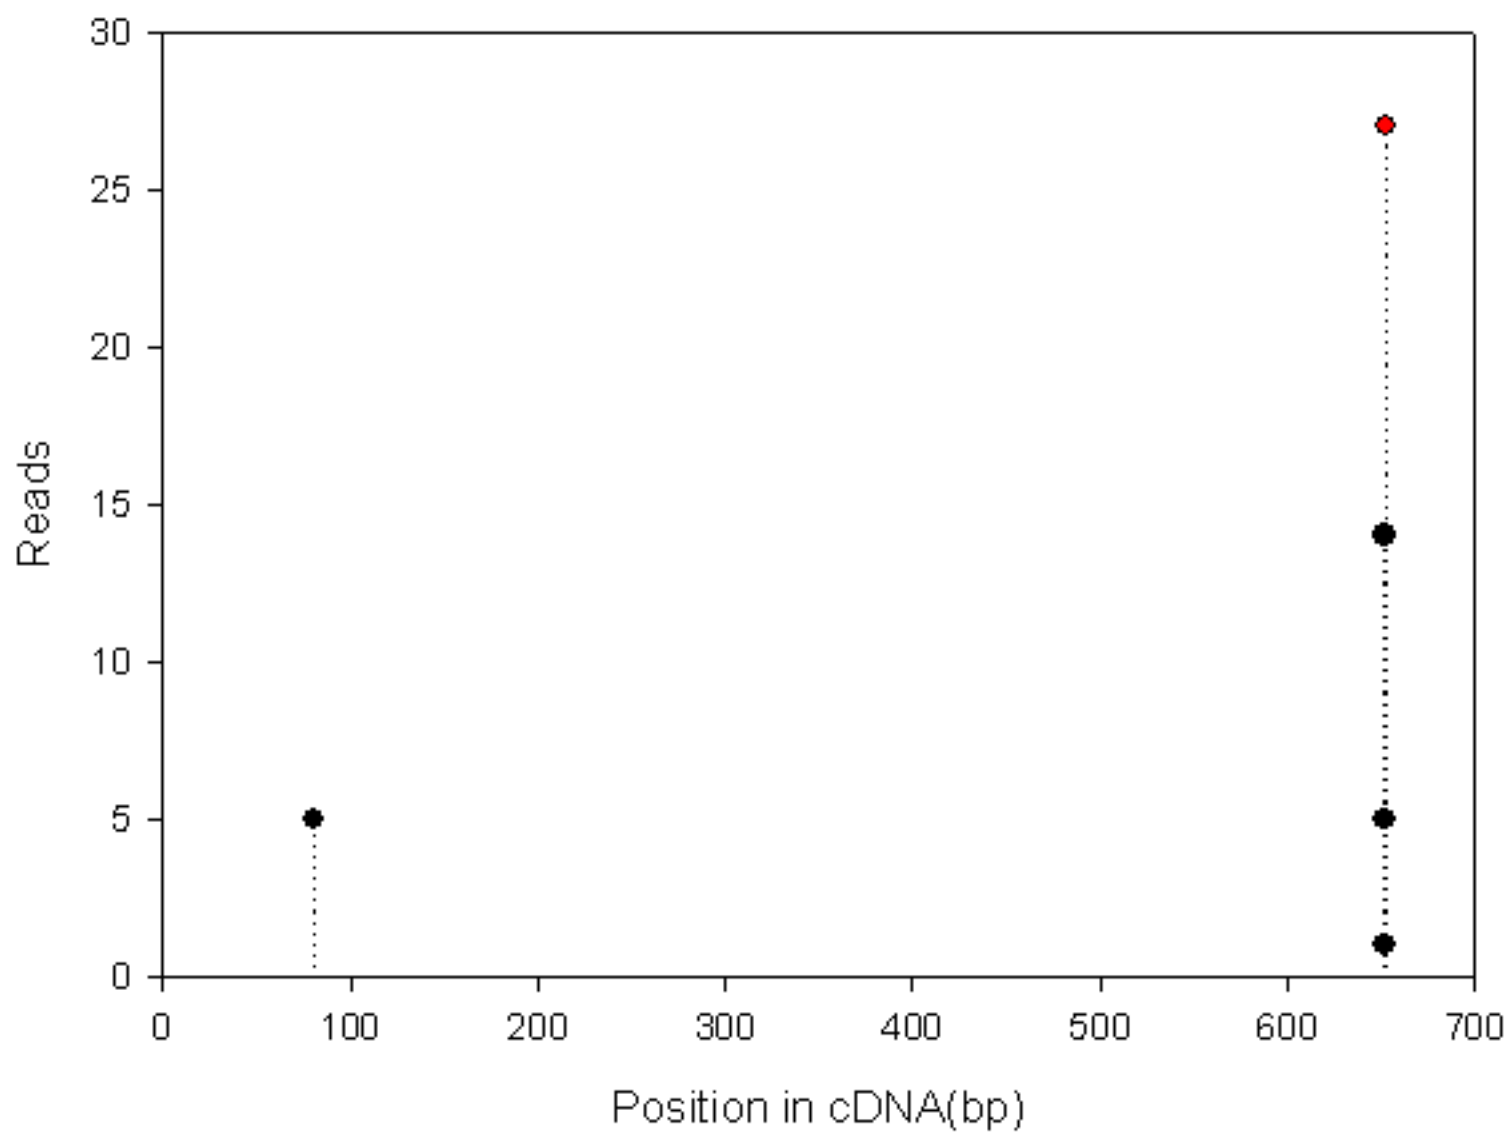

```

5' UCAUCCAAGAAGGCUAUGGAAUGGAC 3'      Cs7g27670.1
   : : : : : : : : : : : : : : :
3' --CAAGUUCUUUCGACACCUU----- 5'      Csi-miR396b.1
  
```

Csi-miR396b.1, target=Cs7g27680.1 gene=Cs7g27680  
 Category:1  
 Score=5  
 Cleavage Site=713

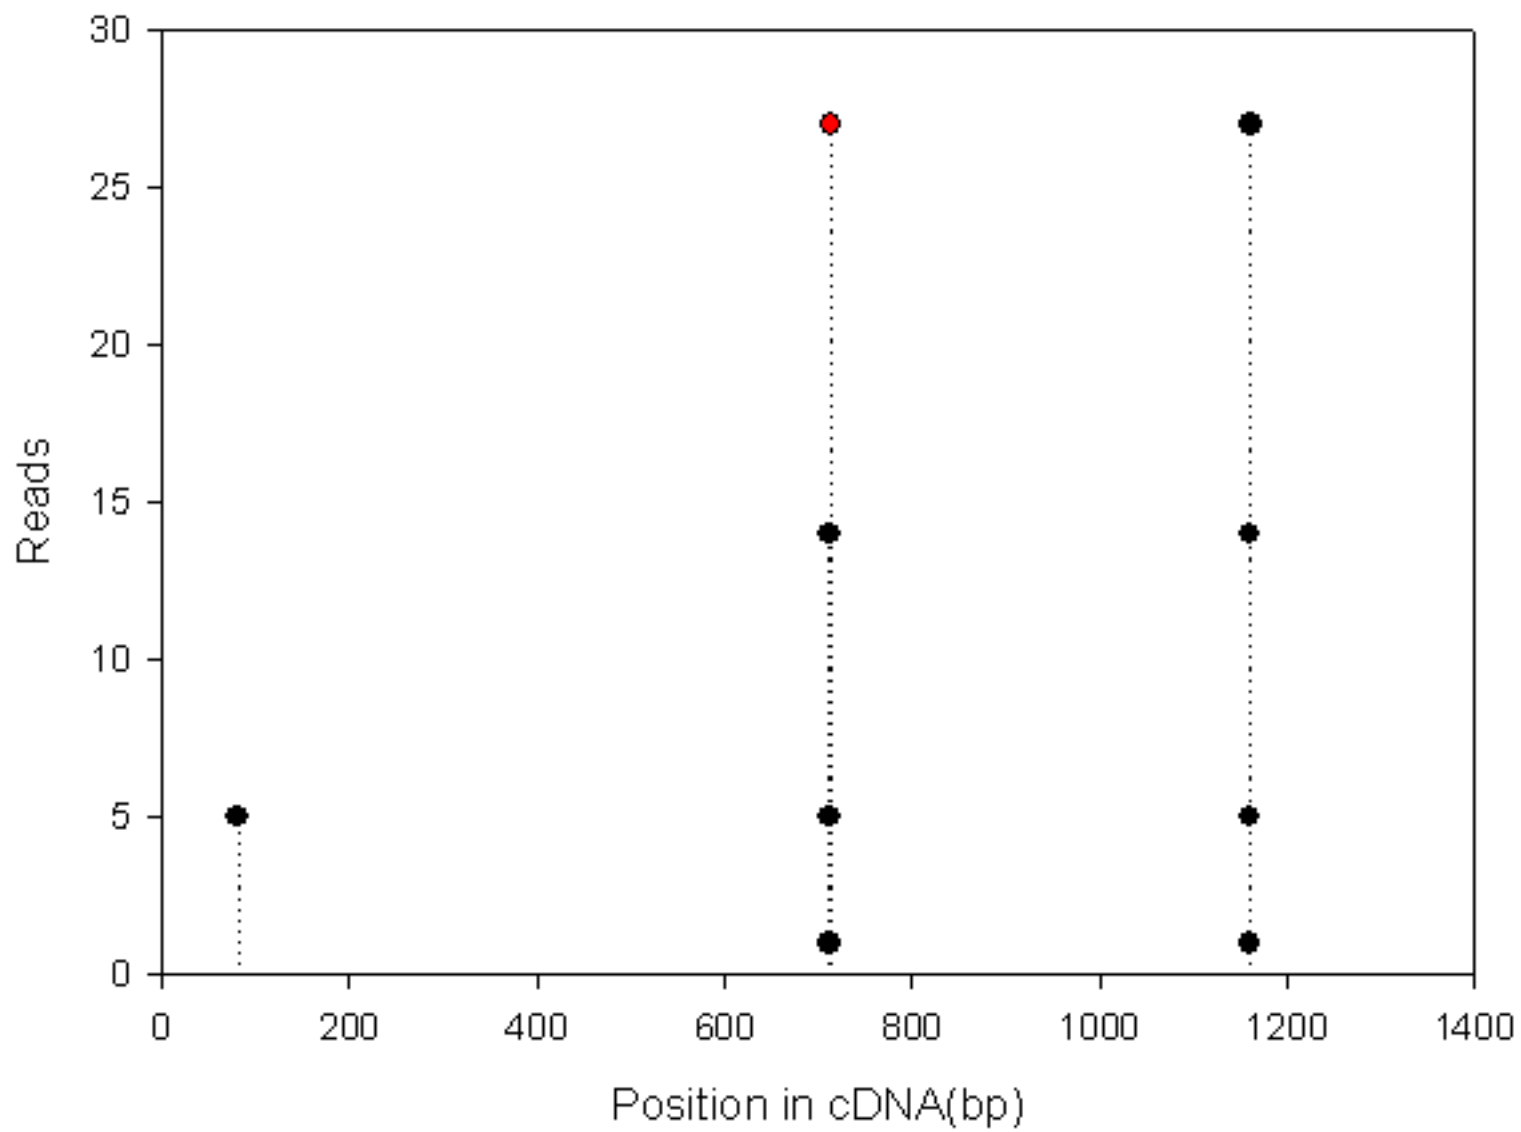

```

5' UCAUCCAAGAAGGCUAUGGAAUGGAC 3'      Cs7g27680.1
   : : : : : : : : : : : : : : :
3' --CAAGUUCUUUCGACACCUU----- 5'      Csi-miR396b.1
  
```

Csi-miR396b.1, target=Orange1.1t00172.1 gene=Orange1.1t00172  
 Category:1  
 Score=2  
 Cleavage Site=656

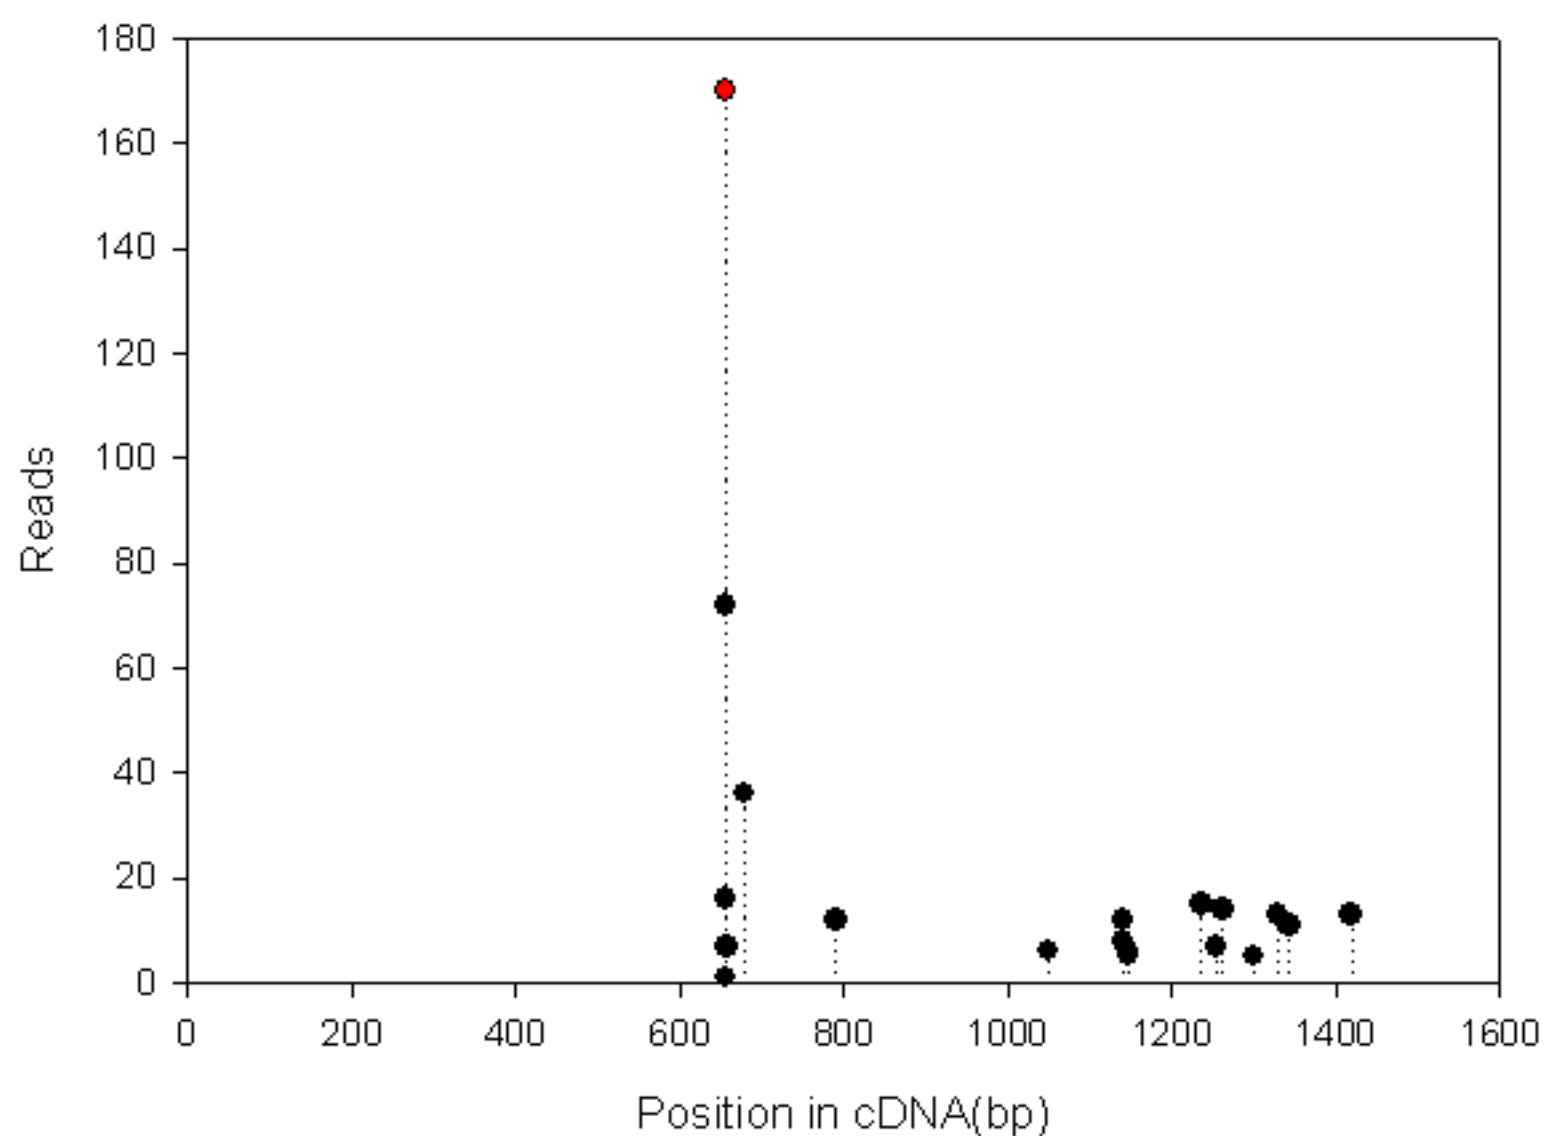

5' ACCGUUCAAGAAAGCCUGUGGAACUU 3'  
 :::::::::::::: ::::::::::  
 3' ---CAAGUUCUUUC-GACACCUU--- 5'

Orange1.1t00172.1  
 Csi-miR396b.1

Csi-miR396b.1, target=Orange1.1t02555.1 gene=Orange1.1t02555

Category:1

Score=2

Cleavage Site=920

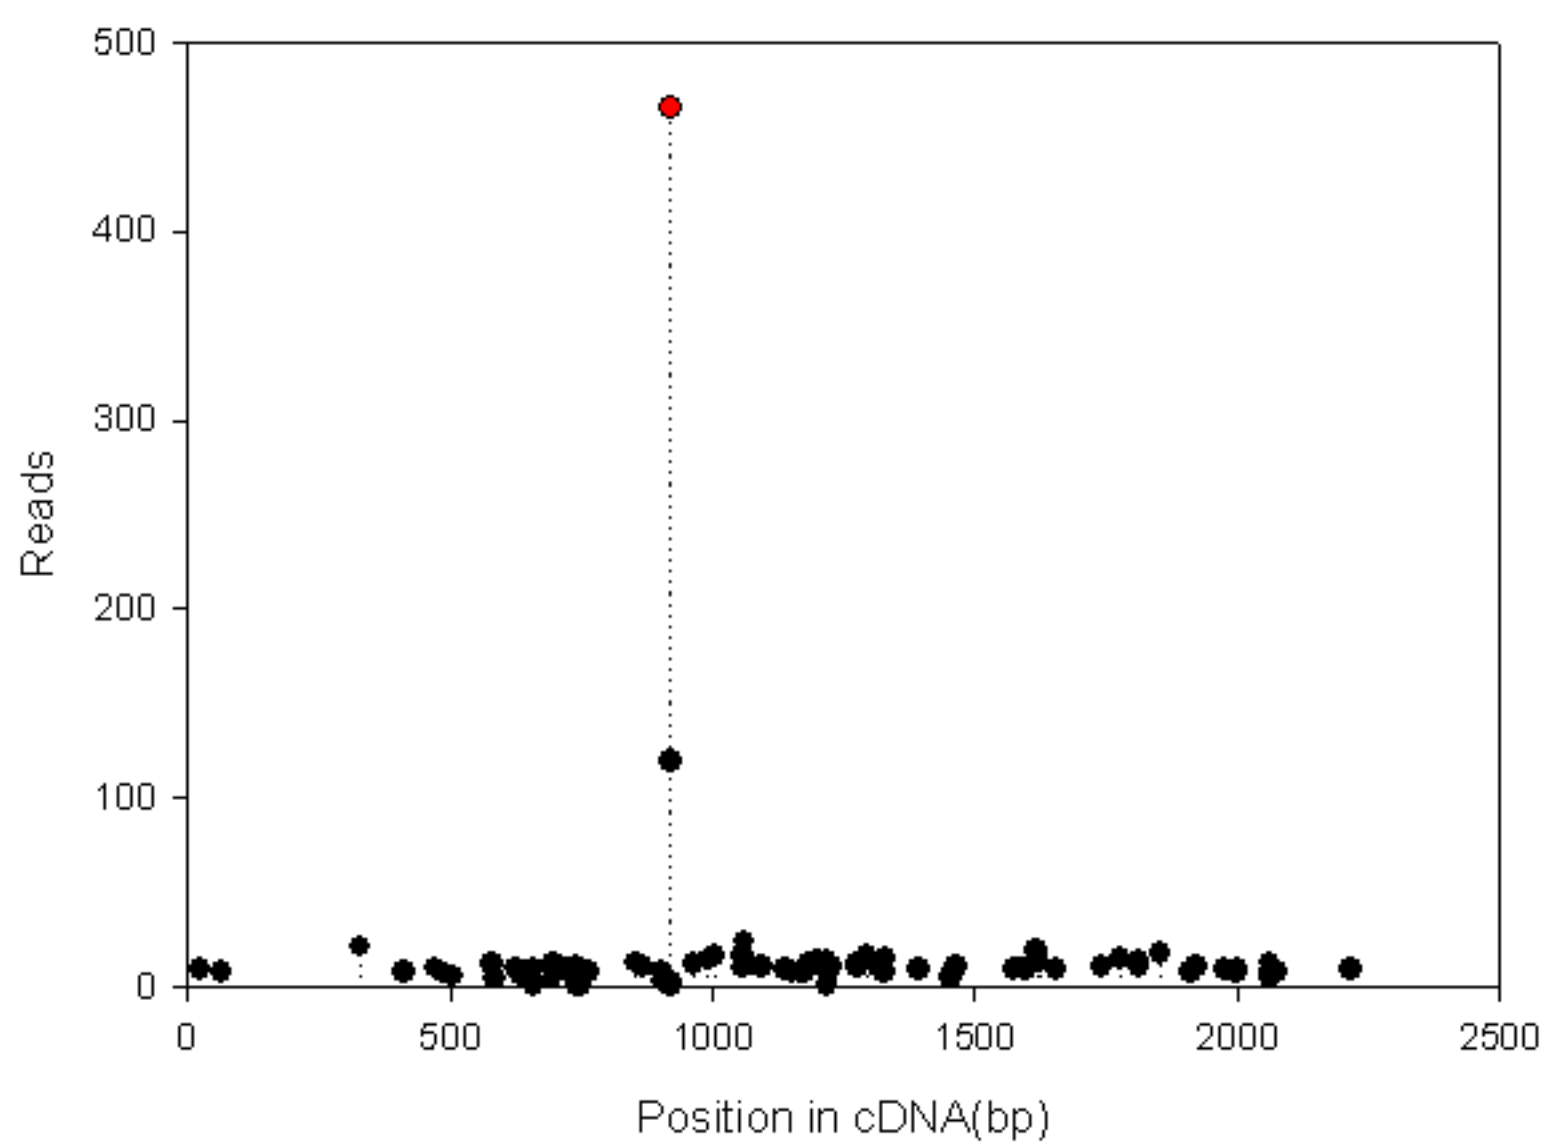

5' CACGUUCAAGAAAGCCUGUGGAACUU 3'

Orange1.1t02555.1

.....

3' ---CAAGUUCUUUC-GACACCUU--- 5'

Csi-miR396b.1

Csi-miR396b.1, target=Orange1.1t03122.1 gene=Orange1.1t03122  
 Category:1  
 Score=2  
 Cleavage Site=583

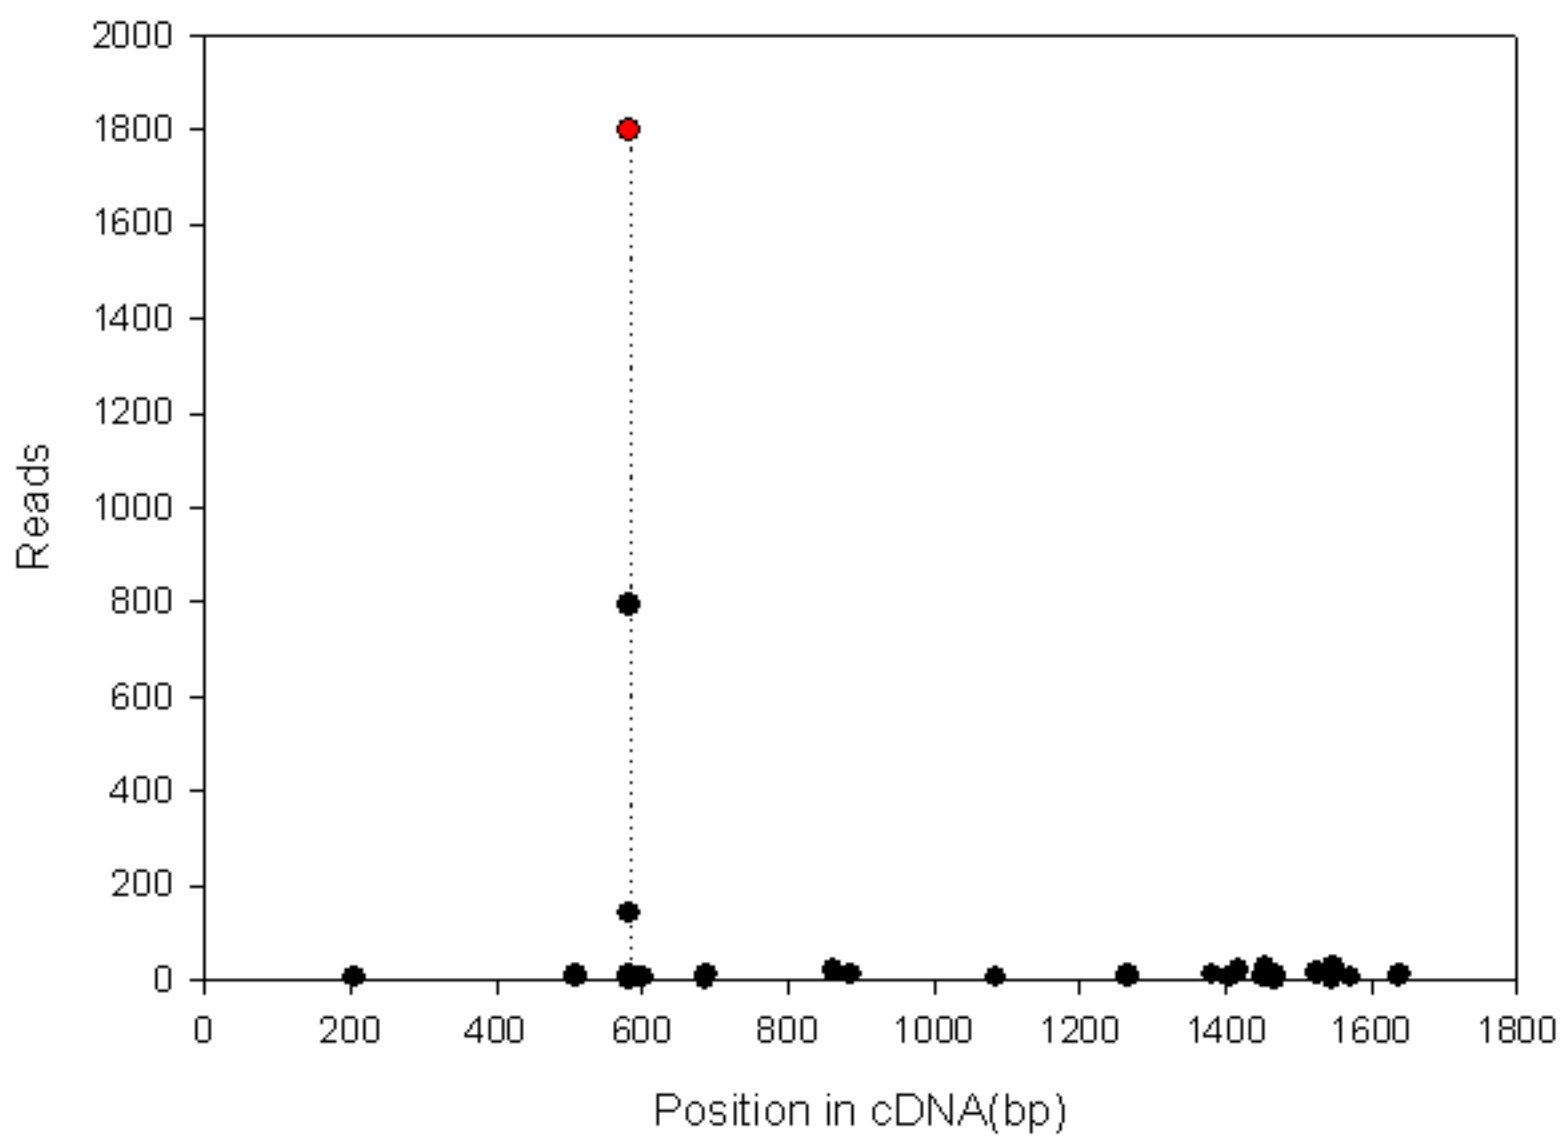

5' ACCGUUCAAGAAAGCCUGUGGAAUCA 3'

Orange1.1t03122.1

.....

3' ---CAAGUUCUUUC-GACACCUU--- 5'

Csi-miR396b.1



Csi-miR396b.2, target=Cs1g21350.1 gene=Cs1g21350  
 Category:1  
 Score=2  
 Cleavage Site=1164



5' ACCGUUCAAGAAAGCCUGUGGAAGGC 3'  
 ::::::::::: :::::::::::  
 3' ----AAGUUCUUUC-GACACCUU---- 5'

Cs1g21350.1

Csi-miR396b.2

Csi-miR396b.2, target=Cs3g23180.1 gene=Cs3g23180  
 Category:1  
 Score=3  
 Cleavage Site=625



|    |                                 |    |               |
|----|---------------------------------|----|---------------|
| 5' | AAAGAUCAAGGAAGCUGUGGGAGUUG      | 3' | Cs3g23180.1   |
|    | : : : : . : : : : : : : : : : : |    |               |
| 3' | ----AAGUUCUUUCGACACCUU----      | 5' | Csi-miR396b.2 |

Csi-miR396b.2, target=Cs4g05000.1 gene=Cs4g05000  
 Category:3  
 Score=2  
 Cleavage Site=1249



```

5' ACCCUUGAAGAAAGCUGUGGAUUAUAG 3'      Cs4g05000.1
   :: ::::::::::::::::::::
3' ----AAGUUCUUUCGACACCUU---- 5'      Csi-miR396b.2
  
```

Csi-miR396b.2, target=Cs4g06230.1 gene=Cs4g06230  
 Category:3  
 Score=5  
 Cleavage Site=3187

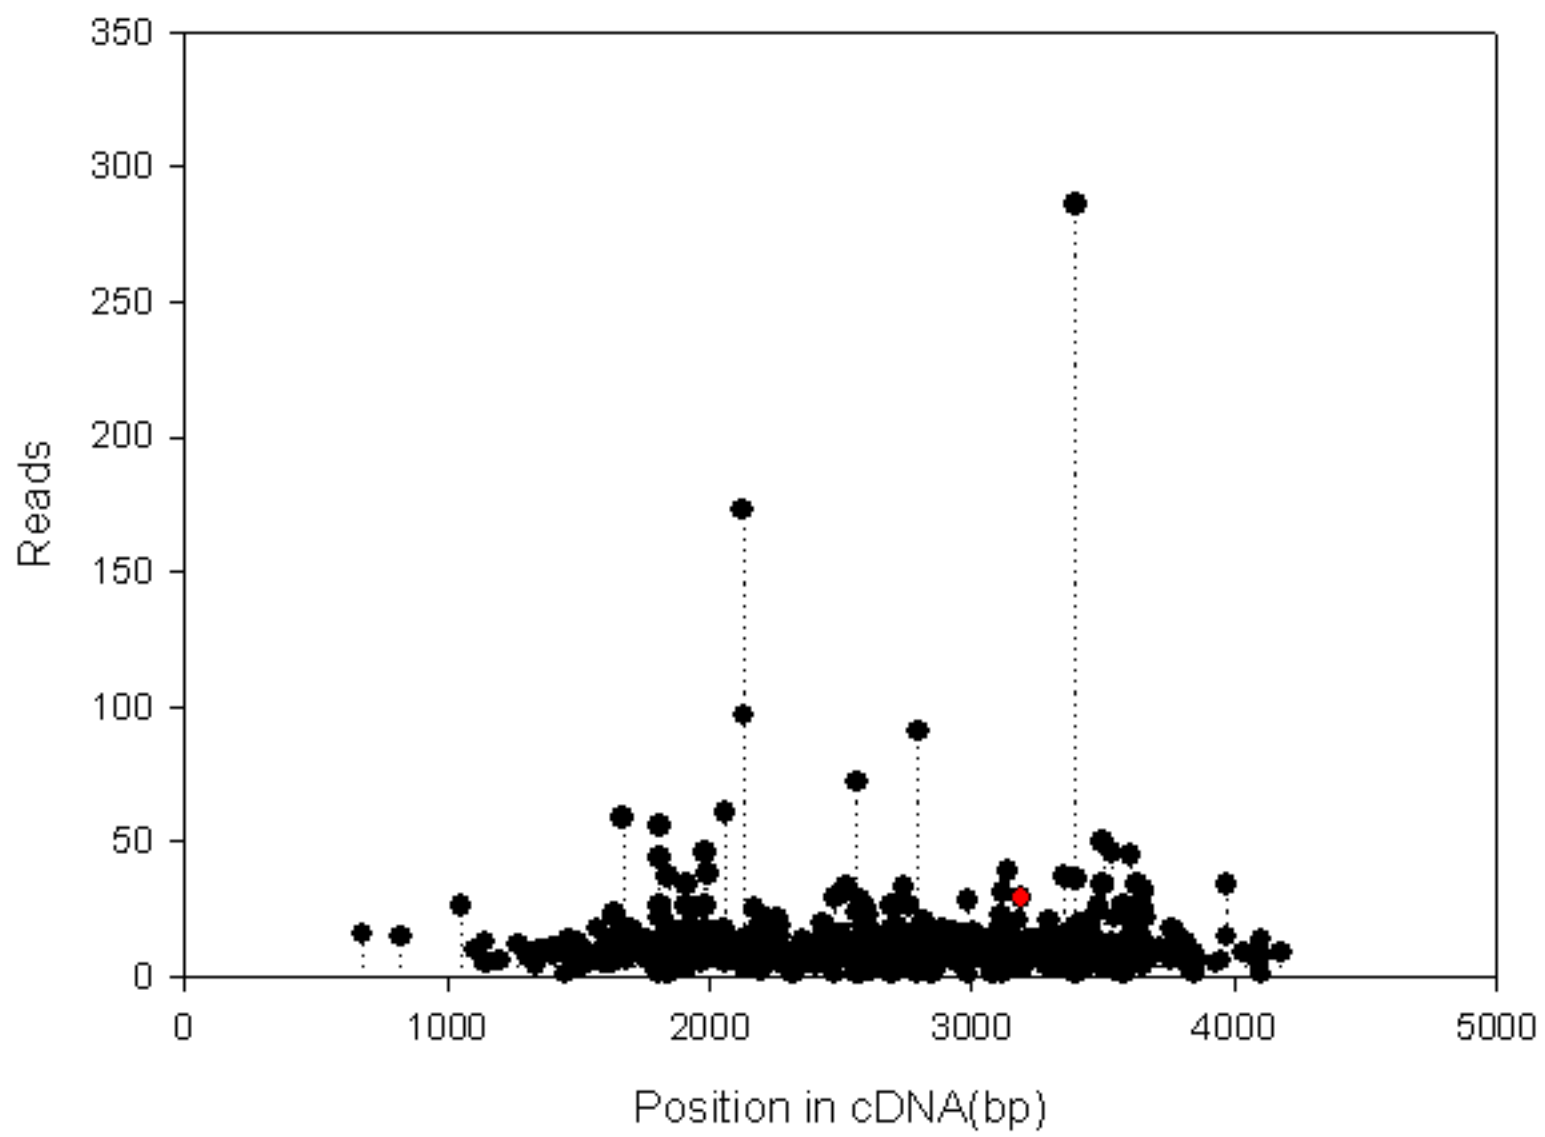

```

5' UACUGGAAGAAAAGCUGUGGAUAACG 3'           Cs4g06230.1
   :  :::  ::::::::::::::
3' ---AAGUUC-UUUCGACACCUU---- 5'           Csi-miR396b.2

```

Csi-miR396b.2, target=Cs5g01380.1 gene=Cs5g01380  
 Category:1  
 Score=2  
 Cleavage Site=1181



```

5' CCGUUCAAGAAAGCCUGUGGAAUUA 3'           Cs5g01380.1
   ::::::::::: :::::::::::
3' ----AAGUUCUUUC-GACACCUU---- 5'         Csi-miR396b.2

```

Csi-miR396b.2, target=Cs5g05620.1 gene=Cs5g05620  
 Category:3  
 Score=5  
 Cleavage Site=403

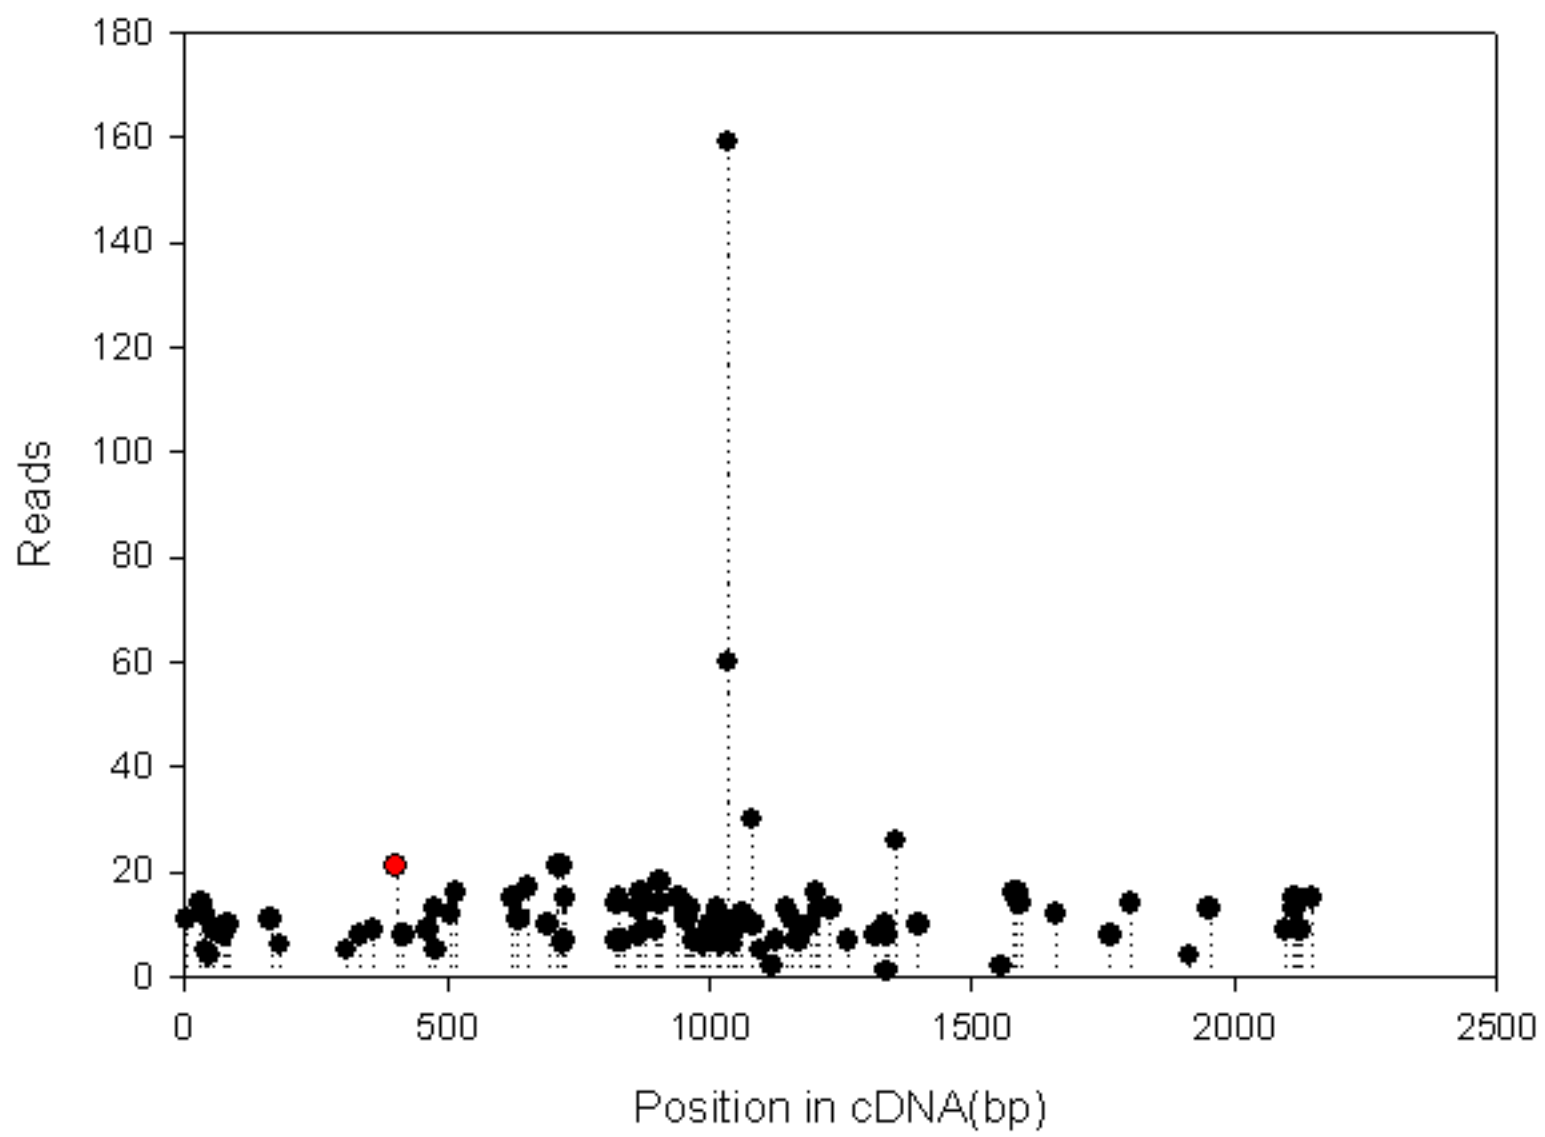

|    |                            |    |               |
|----|----------------------------|----|---------------|
| 5' | GAAGGUGAGAAGAAGGUUGUGGAAAG | 3' | Cs5g05620.1   |
|    | .....                      |    |               |
| 3' | -----AAGUUCUUUCGACACCUU--  | 5' | Csi-miR396b.2 |

Csi-miR396b.2, target=Cs5g06510.1 gene=Cs5g06510  
 Category:3  
 Score=4  
 Cleavage Site=1185



```

5' UAAUCAAGAAAGCUGAGGACUUAGCU 3'      Cs5g06510.1
   ::::::::::::::: :::
3' --AAGUUCUUUCGACACCUU----- 5'      Csi-miR396b.2
  
```

Csi-miR396b.2, target=Cs5g09850.1 gene=Cs5g09850  
 Category:3  
 Score=2  
 Cleavage Site=767



|                                                         |               |
|---------------------------------------------------------|---------------|
| 5' UGCGUUCAAGAAAGCUUGUGGAAGCU 3'                        | Cs5g09850.1   |
| :                          :                          : |               |
| 3' ----AAGUUCUUUCG-ACACCUU---- 5'                       | Csi-miR396b.2 |



Csi-miR396b.2, target=Cs5g24150.1 gene=Cs5g24150  
 Category:1  
 Score=5  
 Cleavage Site=3251



```

5' CGAUCAA-AAAGCUGUAGAAAUCACA 3'      Cs5g24150.1
   : : : : : : : : : : : : : :
3' --AAGUUCUUUCGACACCUU----- 5'      Csi-miR396b.2
  
```

Csi-miR396b.2, target=Cs6g19000.1 gene=Cs6g19000  
 Category:3  
 Score=5  
 Cleavage Site=1901

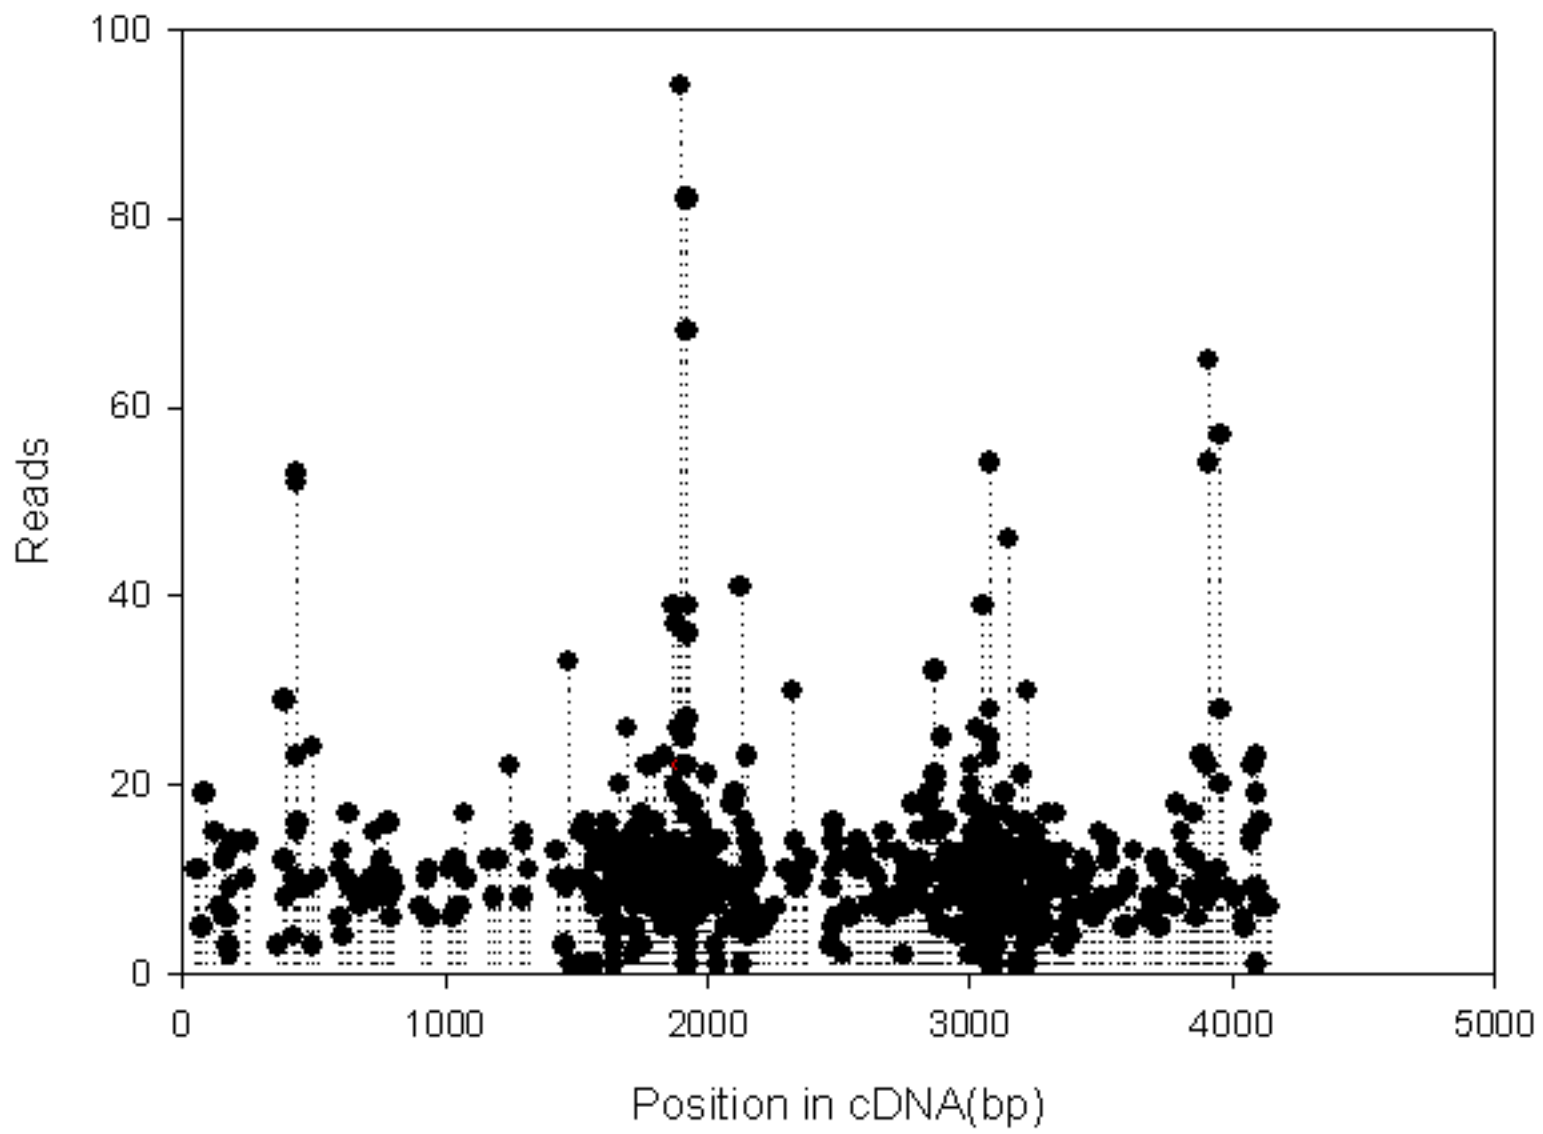

```

5' AAAUGCUUUUGAAGGAAGCUGAGGAU 3'      Cs6g19000.1
      :: :::::
3' -----AAGUUCUUUCGACACCUU 5'      Csi-miR396b.2
  
```

Csi-miR396b.2, target=Cs6g19380.1 gene=Cs6g19380  
 Category:2  
 Score=4  
 Cleavage Site=1152

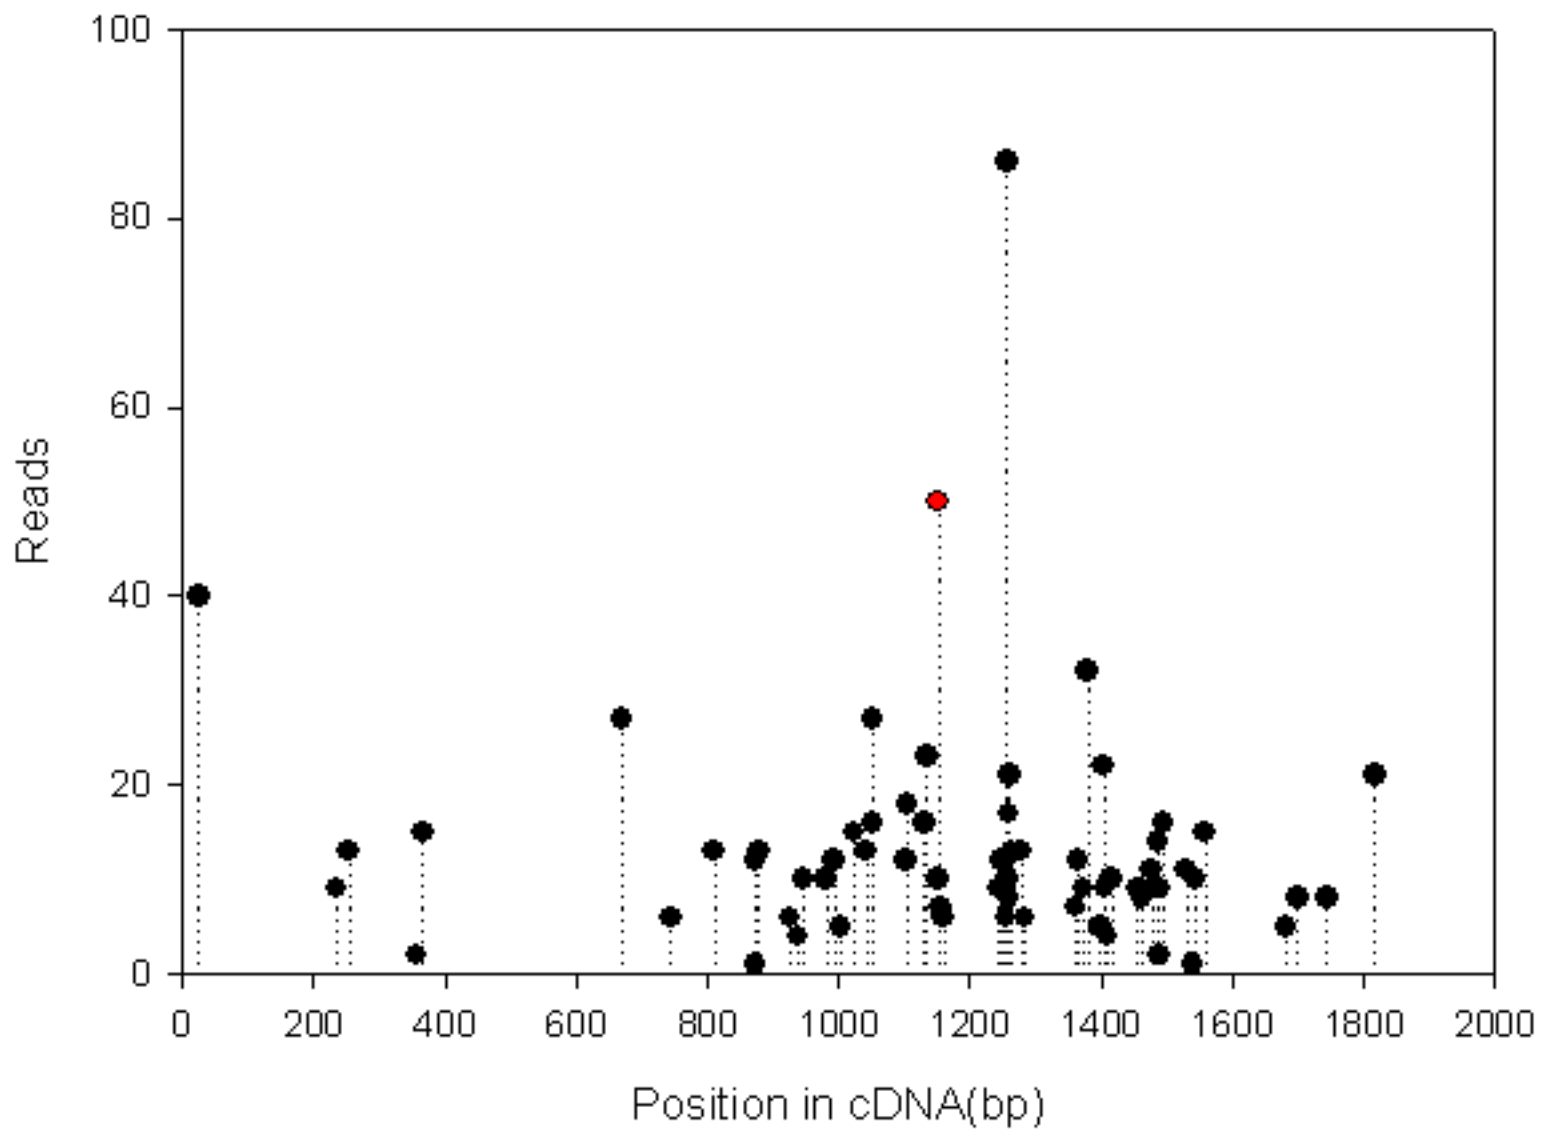

5' CUUUUACUUUUAGAGAAGCUGUGGAA 3'

Cs6g19380.1

:.:.:. .:~::~:~::~:

3' -----AAGUUCUUUCGACACCUU 5'

Csi-miR396b.2

Csi-miR396b.2, target=Cs7g15220.1 gene=Cs7g15220  
 Category:1  
 Score=2  
 Cleavage Site=377

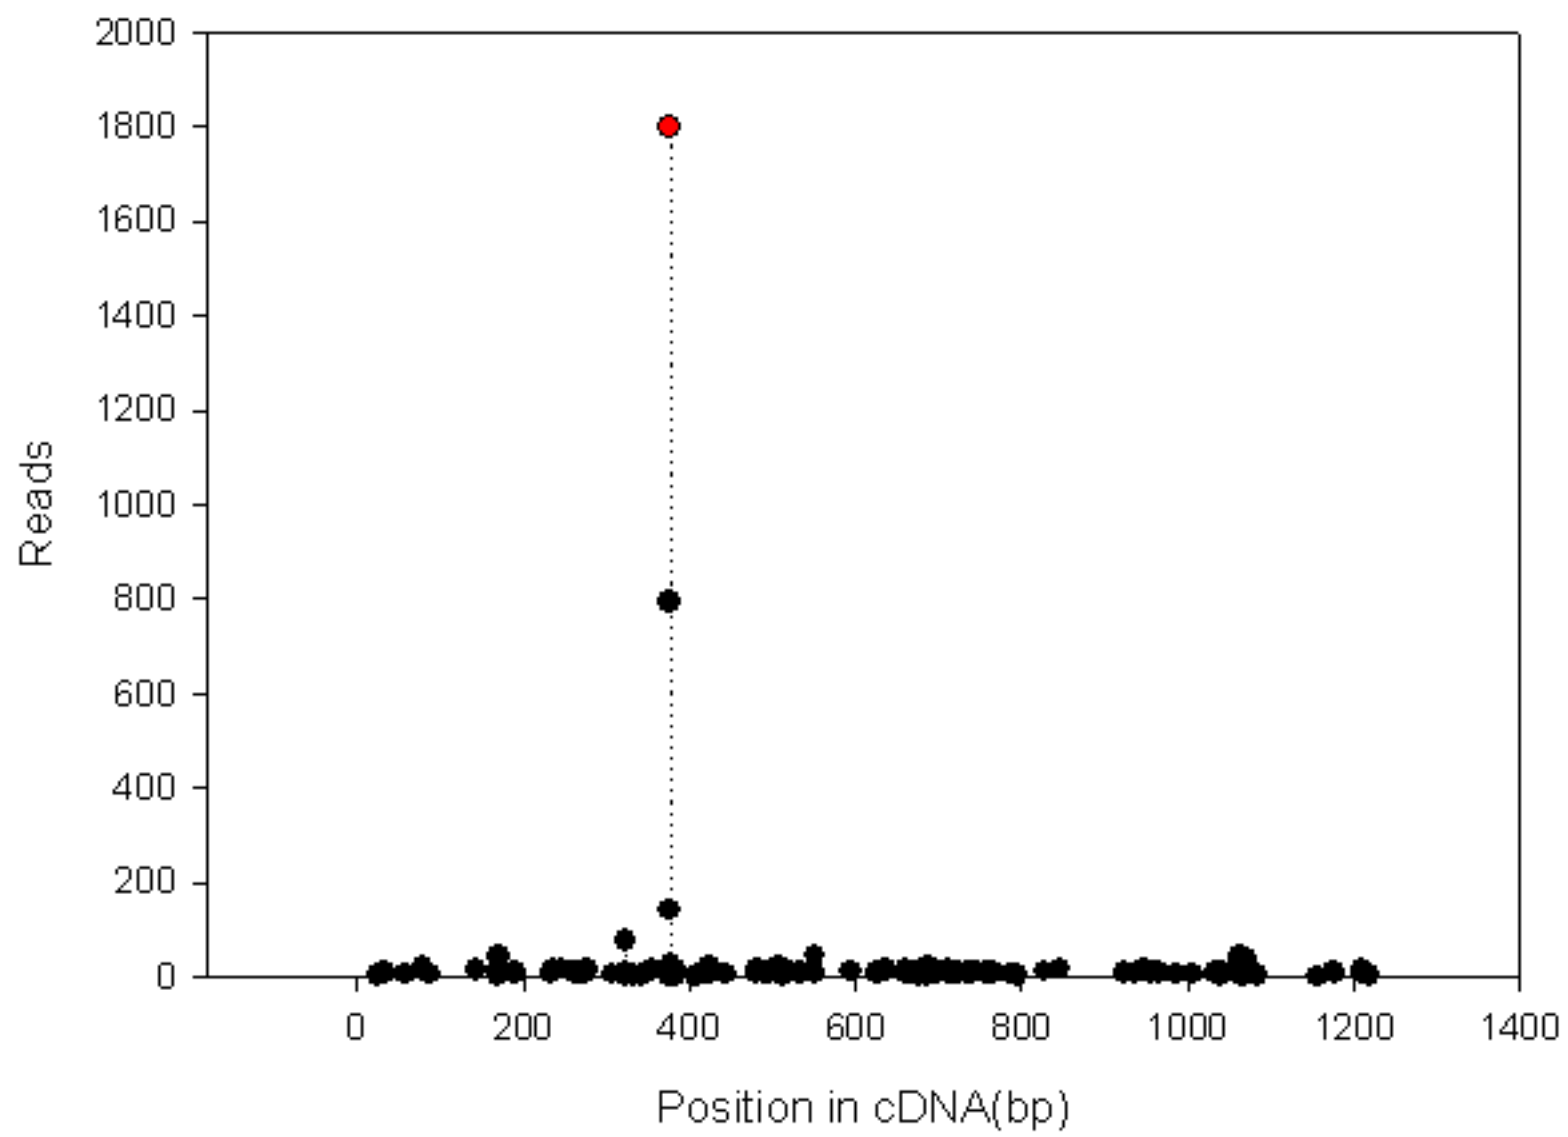

```

5' ACCGUUCAAGAAAGCCUGUGGAAUCA 3'      Cs7g15220.1
   ::::::::::: :::::::::::
3' ----AAGUUCUUUC-GACACCUU---- 5'      Csi-miR396b.2

```

Csi-miR396b.2, target=Cs7g27670.1 gene=Cs7g27670  
 Category:1  
 Score=4  
 Cleavage Site=653

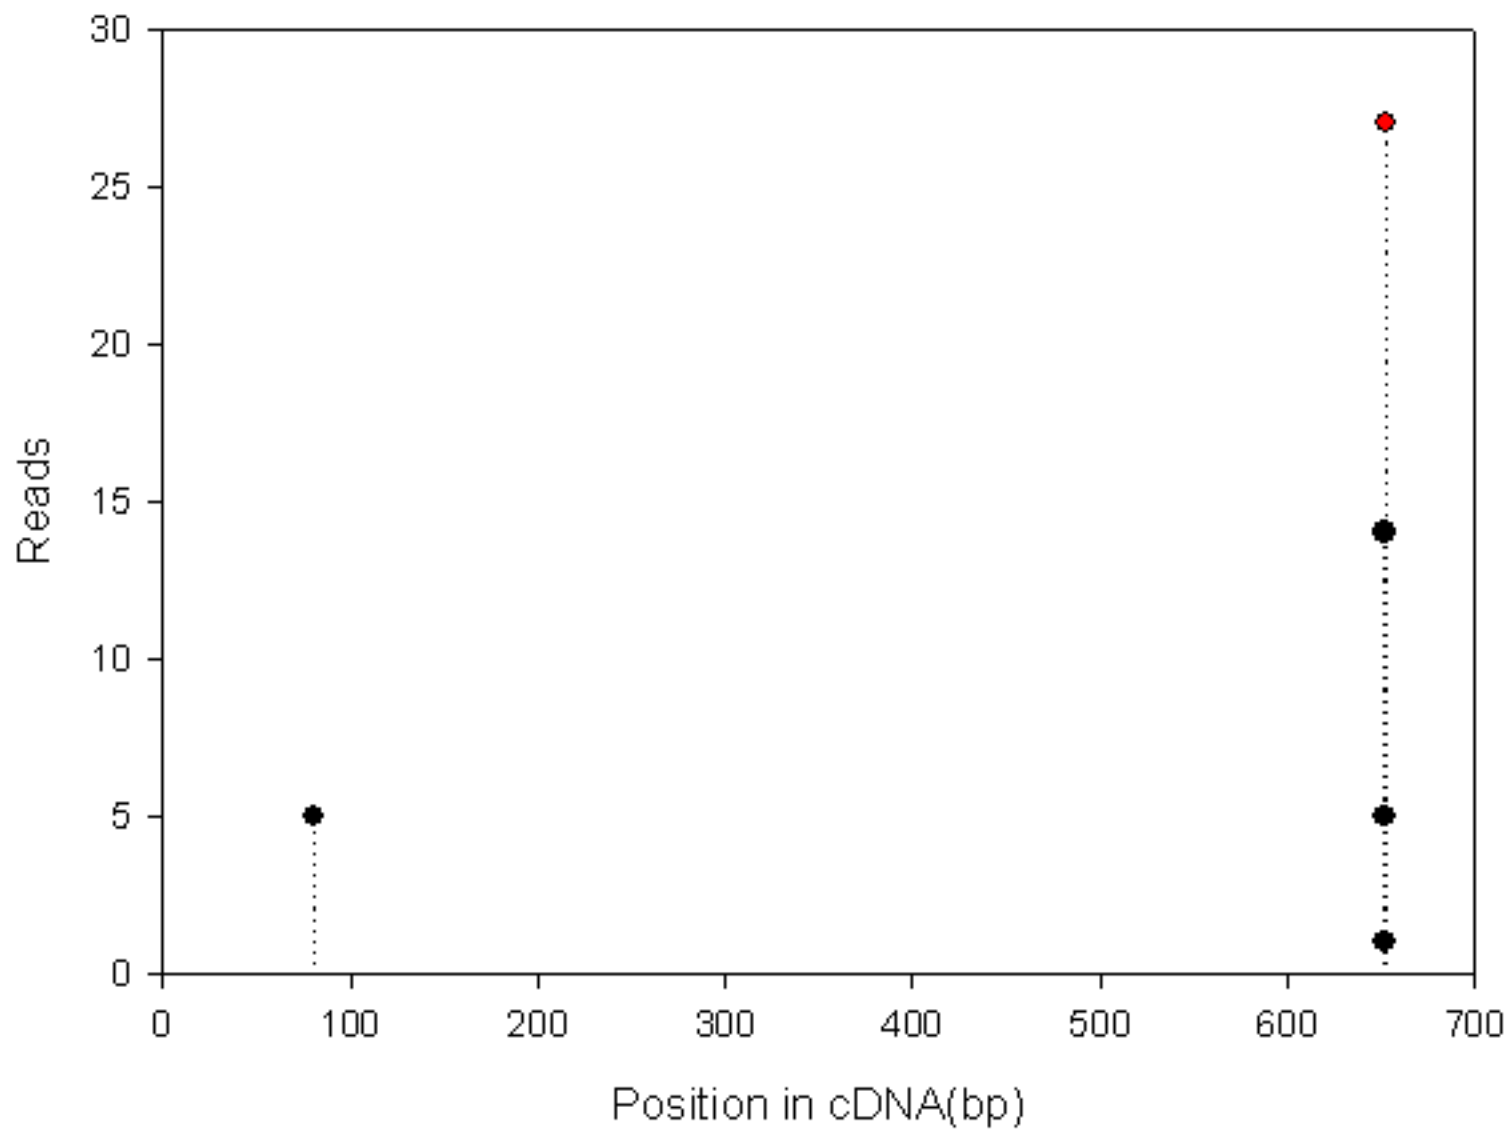

```

5' UCAUCCAAGAAGGCUAUGGAAUGGAC 3'      Cs7g27670.1
   : ::::::::::: :::::
3' ---AAGUUCUUUCGACACCUU----- 5'      Csi-miR396b.2
  
```

Csi-miR396b.2, target=Cs7g27680.1 gene=Cs7g27680  
 Category:1  
 Score=4  
 Cleavage Site=713

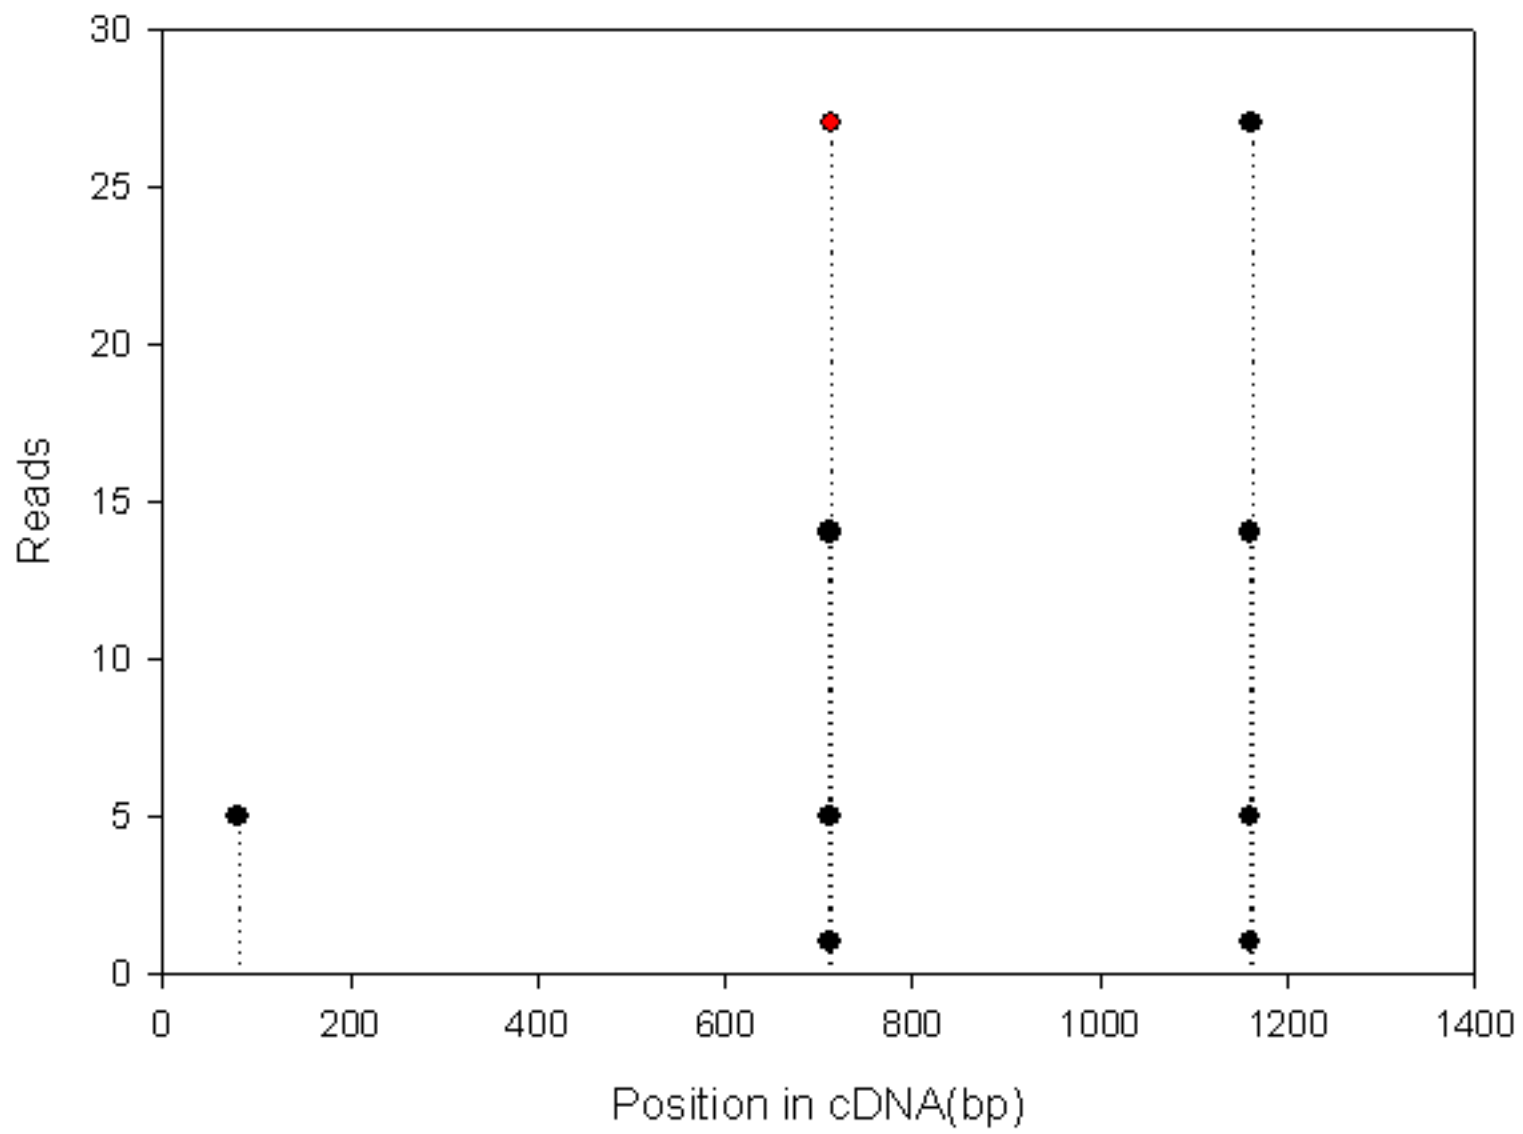

|                                  |               |
|----------------------------------|---------------|
| 5' UCAUCCAAGAAGGCUAUGGAAUGGAC 3' | Cs7g27680.1   |
| : : : : : . : : : : : : : : : :  |               |
| 3' ---AAGUUCUUUCGACACCUU----- 5' | Csi-miR396b.2 |

Csi-miR396b.2, target=Cs8g03020.2 gene=Cs8g03020  
 Category:3  
 Score=5  
 Cleavage Site=5475

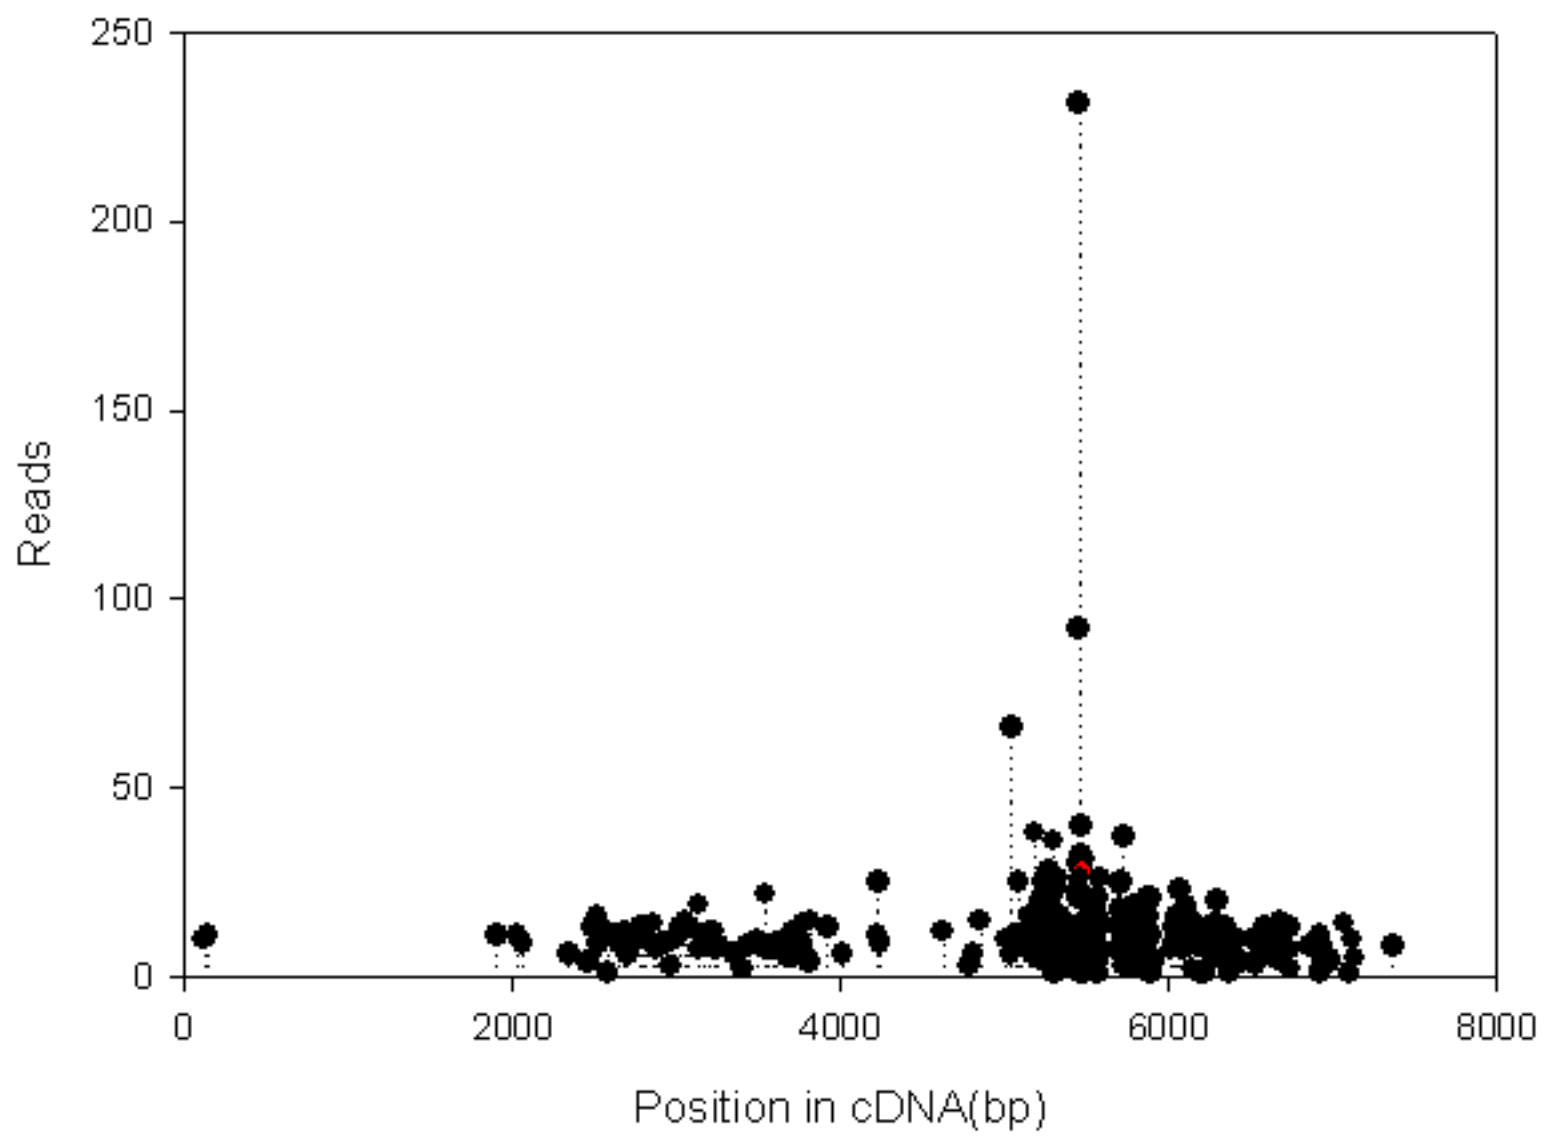

```

5' CCUGCACGAAAGCUUUGGACCAUUC 3'      Cs8g03020.2
   :  :  : : : : : : : : : : :
3' --AAGUUCUUUCGACACCUU----- 5'      Csi-miR396b.2
  
```

Csi-miR396b.2, target=Cs8g17370.1 gene=Cs8g17370  
 Category:3  
 Score=4.5  
 Cleavage Site=140

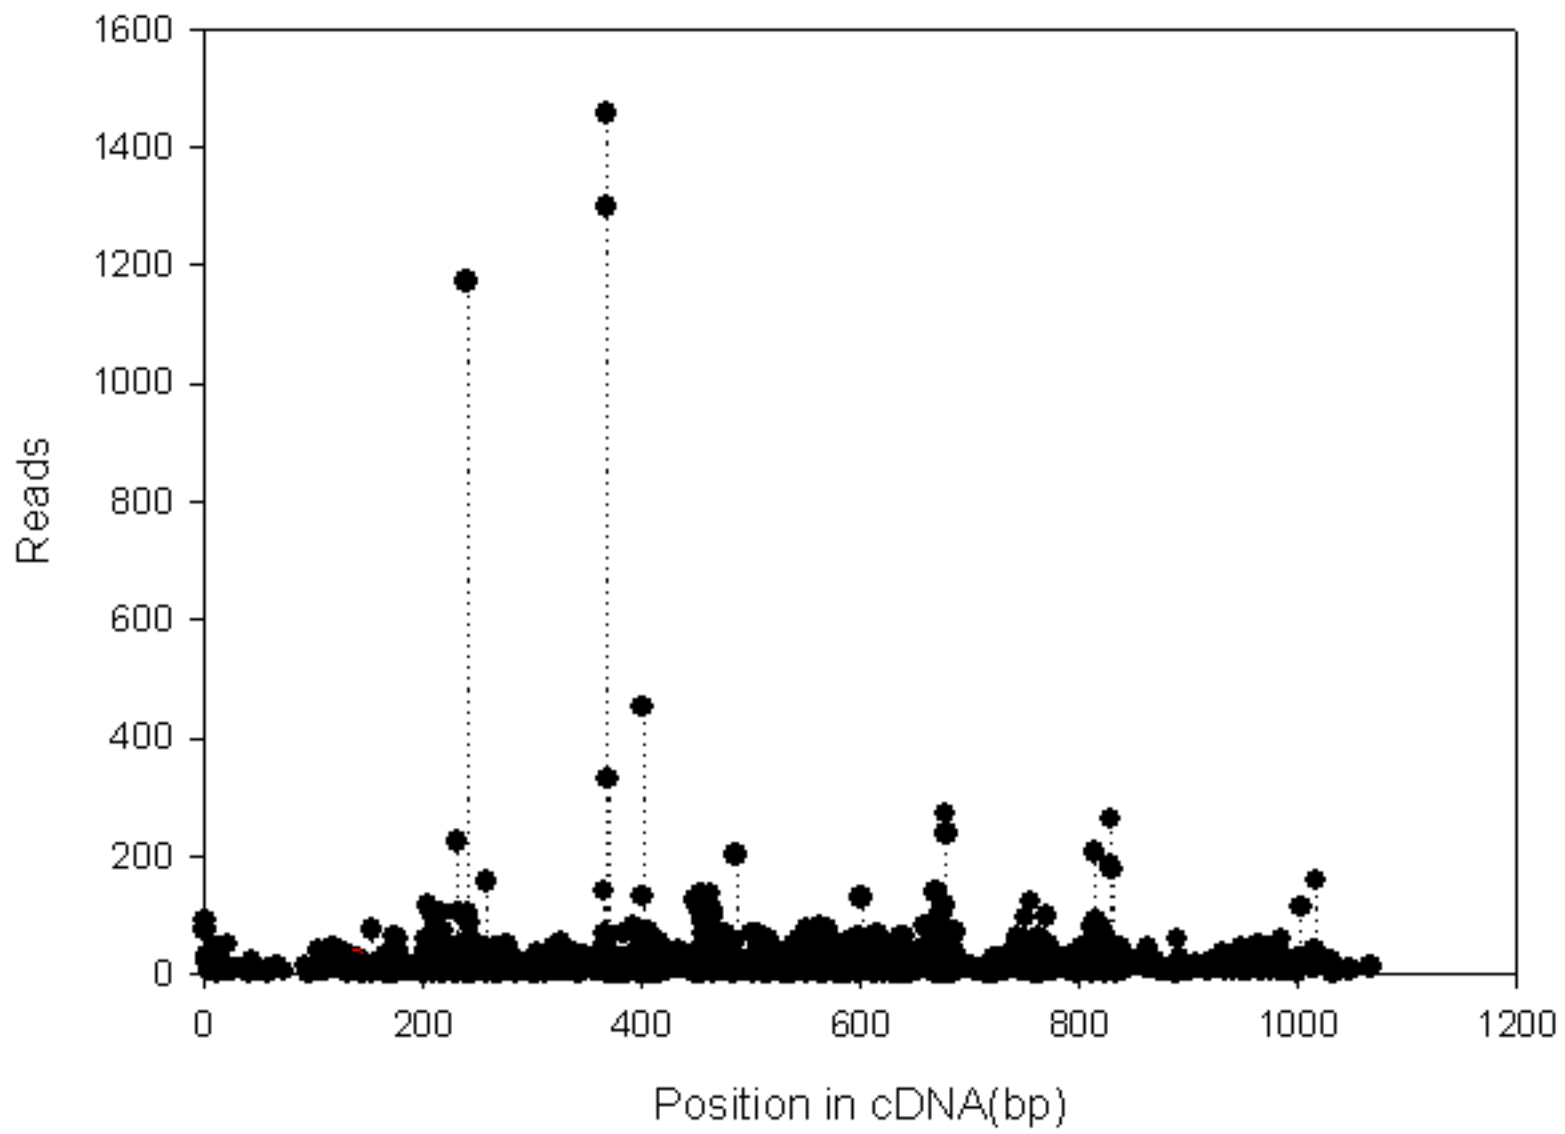

```

5' AGGAUUACAAGAAGGCCGUGGAGAAA 3'      Cs8g17370.1
   : : : : : : : : : : : : : : : :
3' -----AAGUUCUUUCGACACCUU---- 5'    Csi-miR396b.2
  
```



Csi-miR396b.2, target=Orange1.1t00172.1 gene=Orange1.1t00172  
 Category:1  
 Score=2  
 Cleavage Site=656

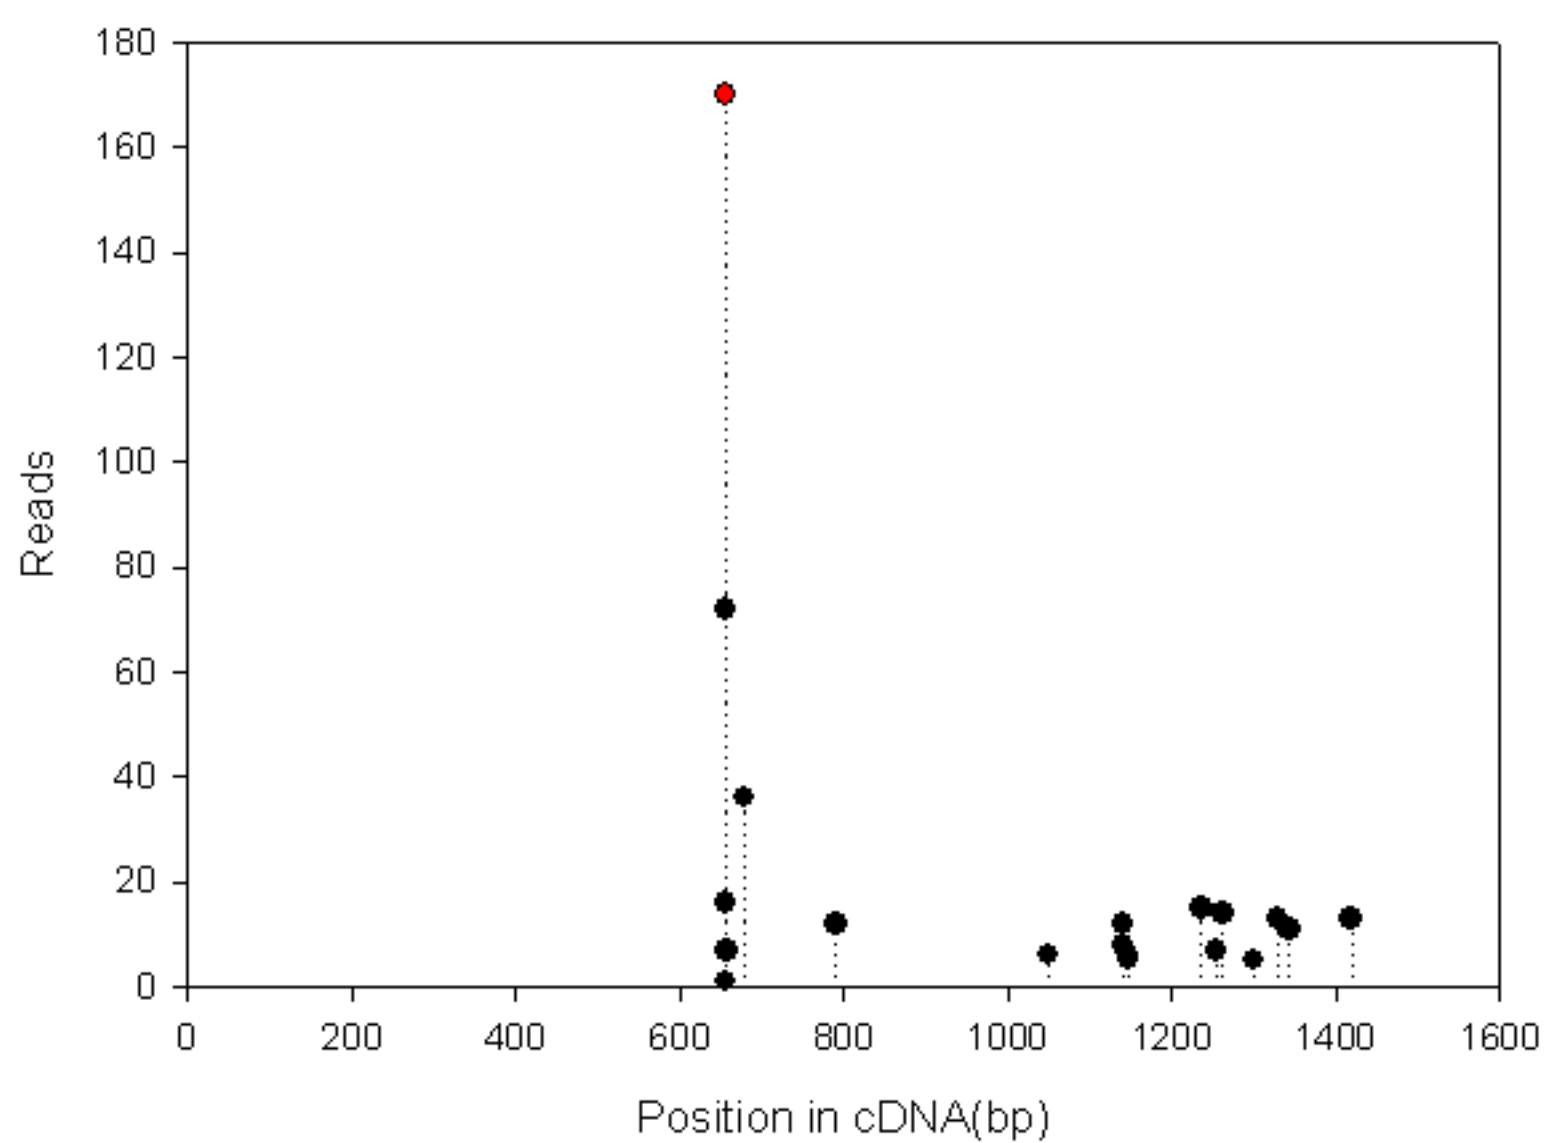

```

5' ACCGUUCAAGAAAGCCUGUGGAACUU 3'      Orange1.1t00172.1
   ::::::::::: :::::::::::
3' ----AAGUUCUUUC-GACACCUU---- 5'      Csi-miR396b.2
  
```

Csi-miR396b.2, target=Orange1.1t02555.1 gene=Orange1.1t02555

Category:1

Score=2

Cleavage Site=920

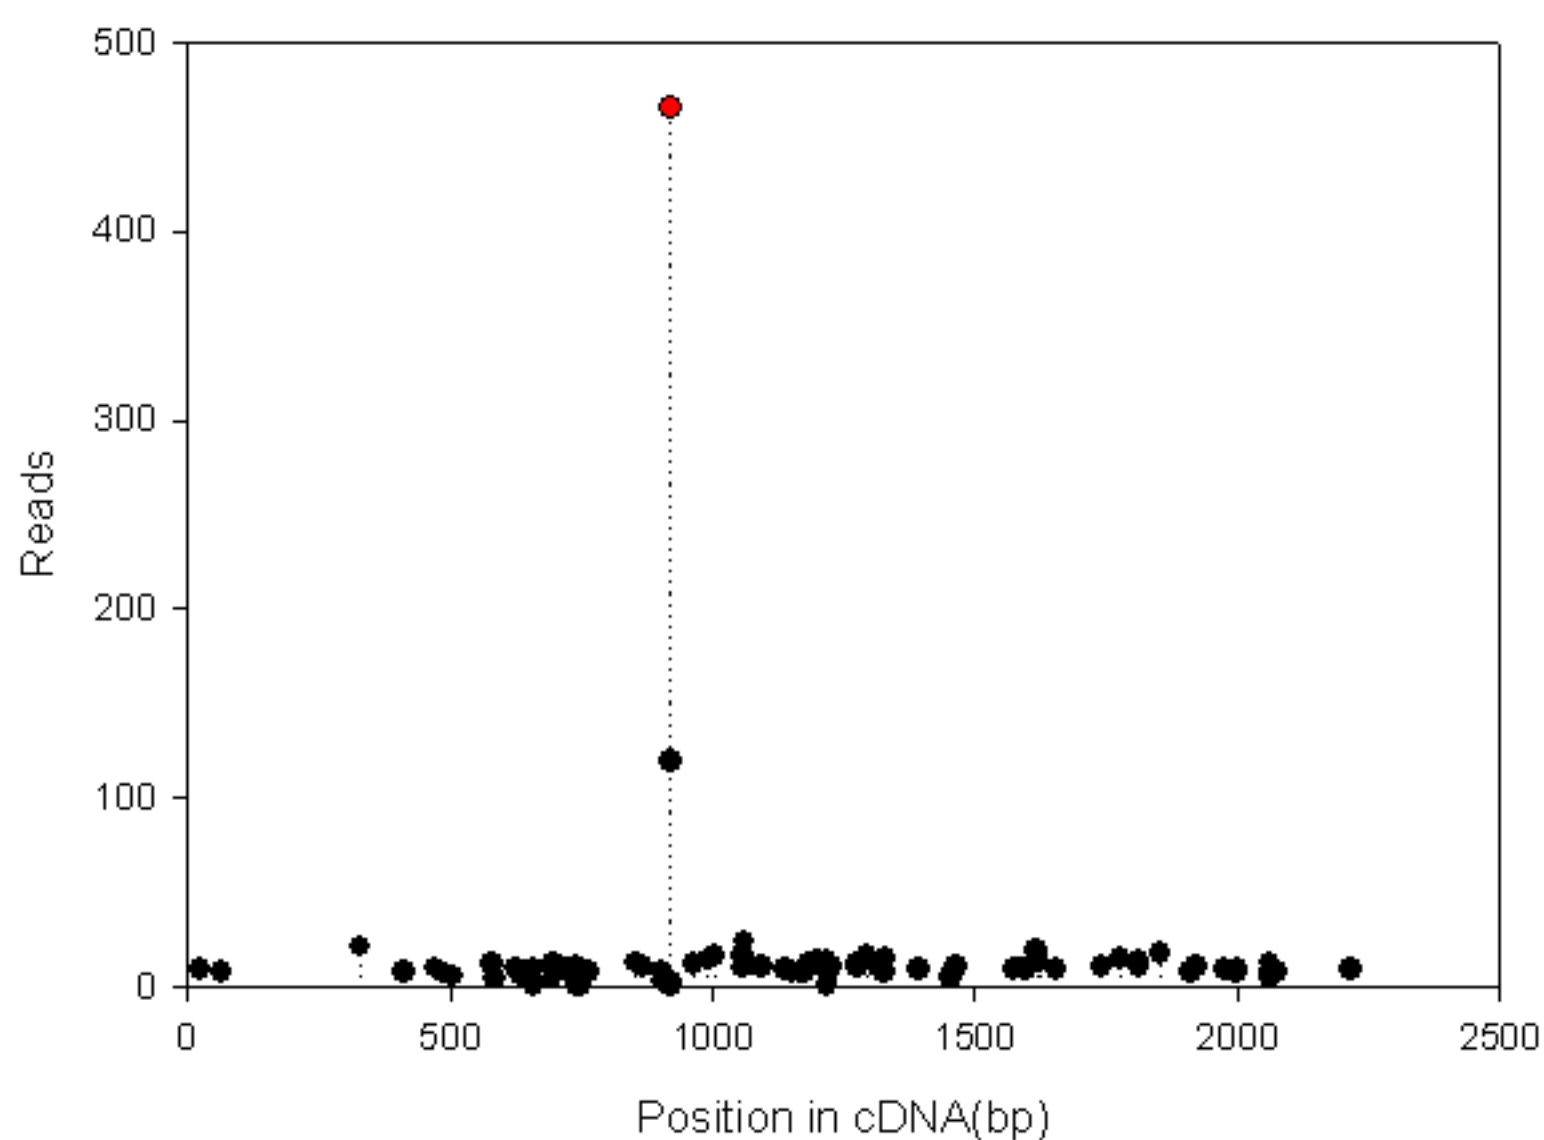

5' CACGUUCAAGAAAGCCUGUGGAACUU 3'

Orange1.1t02555.1

.....

3' ----AAGUUCUUUC-GACACCUU---- 5'

Csi-miR396b.2

Csi-miR396b.2, target=Orange1.1t03122.1 gene=Orange1.1t03122  
 Category:1  
 Score=2  
 Cleavage Site=583



5' ACCGUUCAAGAAAGCCUGUGGAAUCA 3'  
 ::::::::::: :::::::::::  
 3' ----AAGUUCUUUC-GACACCUU---- 5'

Orange1.1t03122.1  
 Csi-miR396b.2

Csi-miR396b.3, target=Cs1g21350.1 gene=Cs1g21350  
 Category:1  
 Score=4  
 Cleavage Site=1164



5' ACCGUUCAAGAAAGCCUGUGGAAGGC 3'  
 :::::::::::::: ::::::::::  
 3' -UUCAAGUUCUUUC-GACACCUU--- 5'

Cs1g21350.1  
 Csi-miR396b.3

Csi-miR396b.3, target=Cs1g22520.1 gene=Cs1g22520  
 Category:1  
 Score=3  
 Cleavage Site=226



```

5' GAAGUUCAAGAAAUCUGUGGGAAGAA 3'      Cs1g22520.1
   :::::::::::::::::::::
3' -UUCAAGUUCUUUCGACACCUU----- 5'    Csi-miR396b.3
  
```

Csi-miR396b.3, target=Cs3g23180.1 gene=Cs3g23180  
 Category:1  
 Score=3  
 Cleavage Site=625



```

5' AAAGAUCAAGGAAGCUGUGGGAGUUG 3'      Cs3g23180.1
   ::: : : : : : : : : : : : : : :
3' -UUCAAGUUCUUUCGACACCUU----- 5'    Csi-miR396b.3

```

Csi-miR396b.3, target=Cs5g01380.1 gene=Cs5g01380  
 Category:1  
 Score=4  
 Cleavage Site=1181

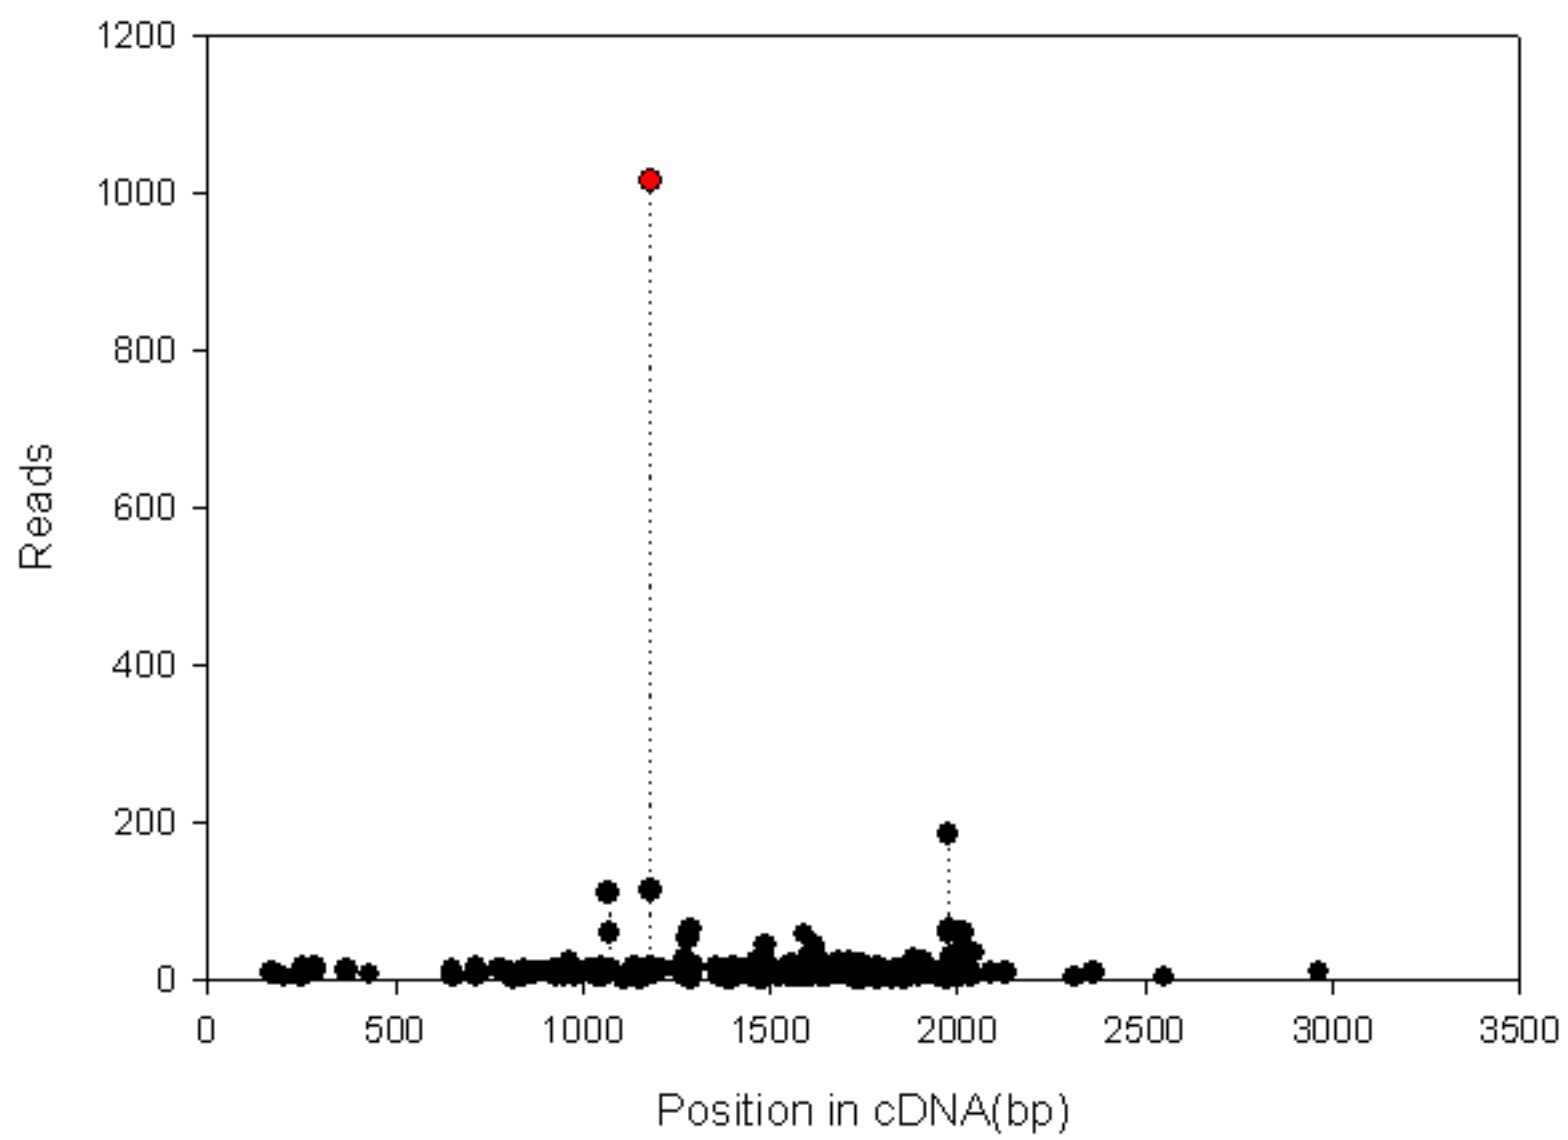

5' CCGUUCAAGAAAGCCUGUGGAAUUA 3'  
 ::::::::::: :::::::::::  
 3' -UUCAAGUUCUUUC-GACACCUU--- 5'

Cs5g01380.1

Csi-miR396b.3

Csi-miR396b.3, target=Cs5g09850.1 gene=Cs5g09850

Category:3

Score=3.5

Cleavage Site=767

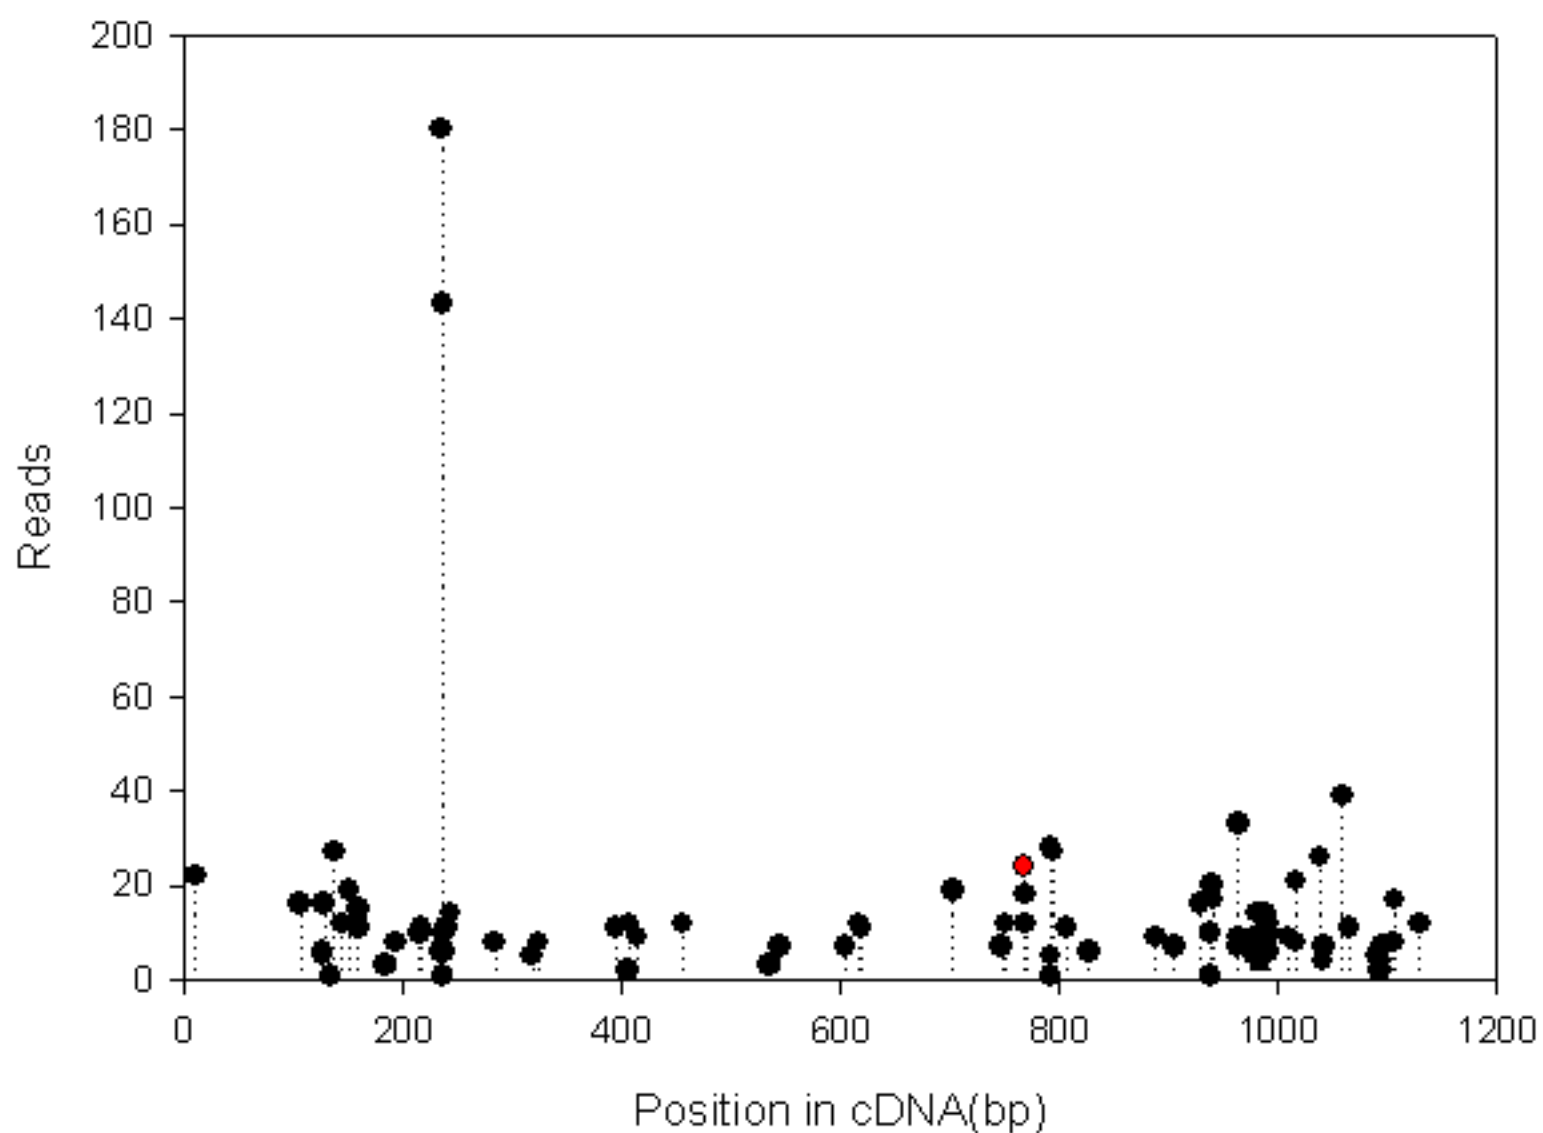

5' UCGGUUCAAGAAAGCUUGUGGAAGCU 3'

Cs5g09850.1

. :::::::::::::::::::: :::::::

3' -UUCAAGUUCUUUCG-ACACCUU--- 5'

Csi-miR396b.3



Csi-miR396b.3, target=Cs7g15220.1 gene=Cs7g15220  
 Category:1  
 Score=4  
 Cleavage Site=377

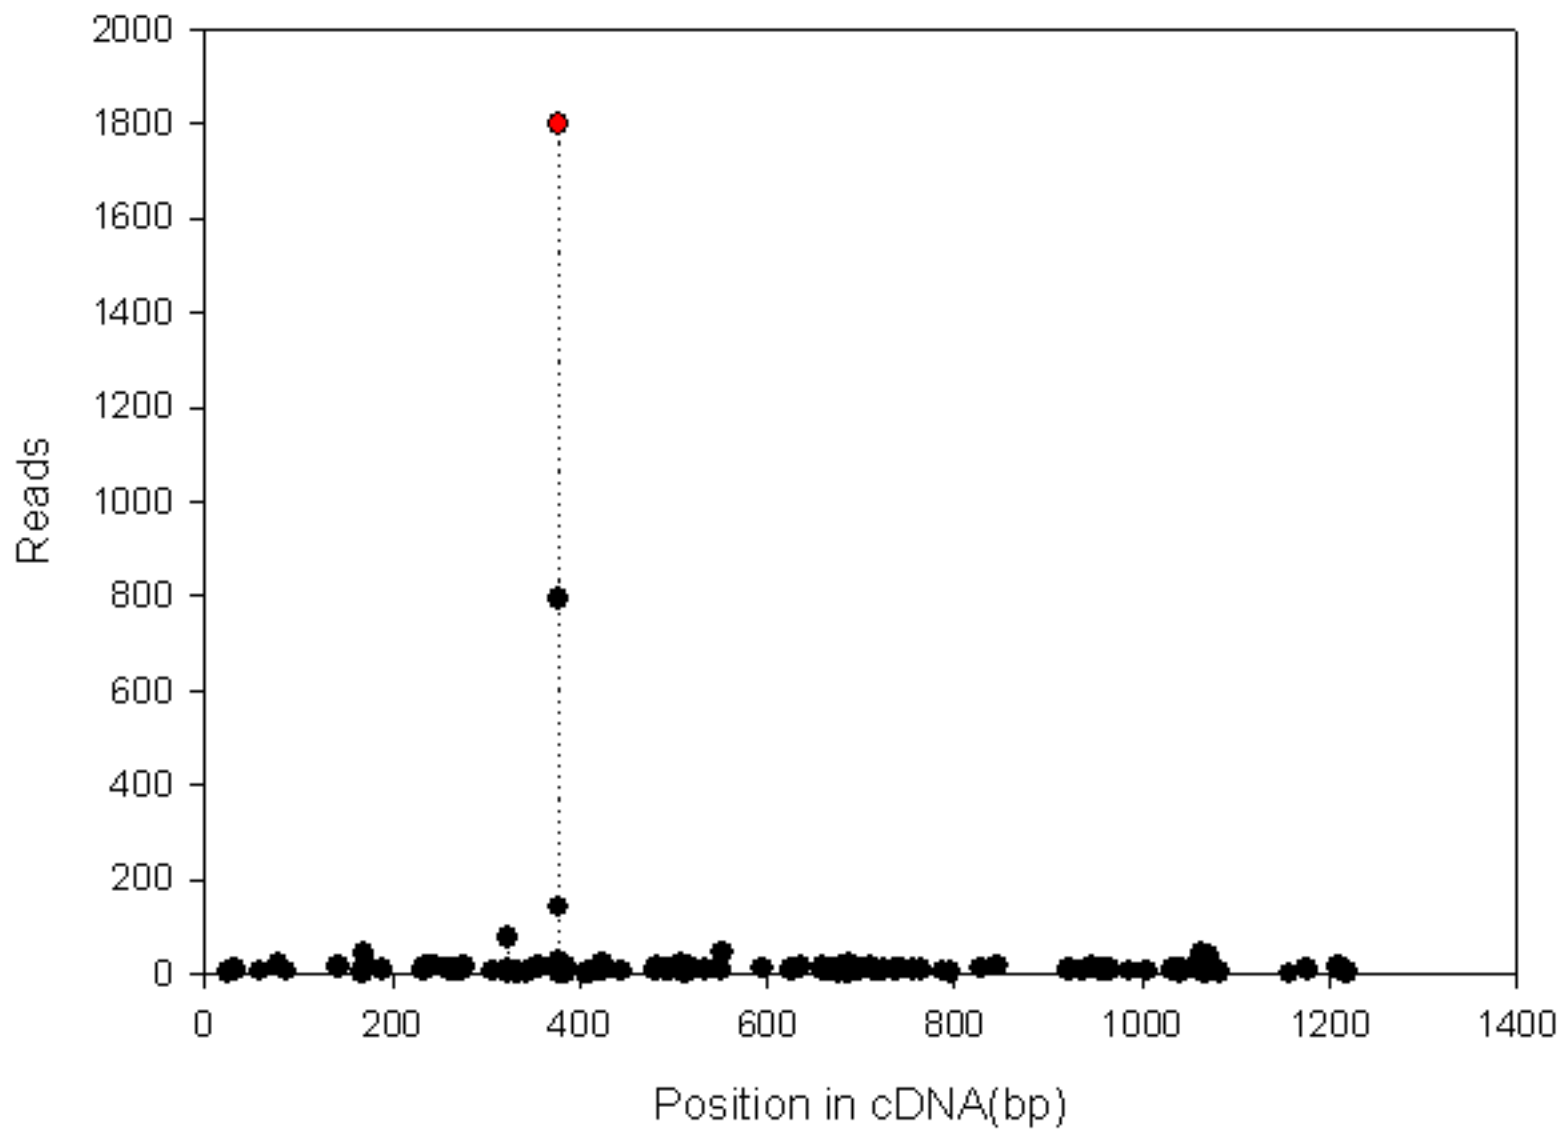

```

5' ACCGUUCAAGAAAGCCUGUGGAAUCA 3'      Cs7g15220.1
   ::::::::::::::: :::::::::::::::
3' -UUCAAGUUCUUUC-GACACCUU--- 5'      Csi-miR396b.3
  
```

Csi-miR396b.3, target=Orange1.1t00172.1 gene=Orange1.1t00172  
 Category:1  
 Score=4  
 Cleavage Site=656



5' ACCGUUCAAGAAAGCCUGUGGAACUU 3'  
 :::::::::::::: ::::::::::::::  
 3' -UUCAAGUUCUUUC-GACACCUU--- 5'

Orange1.1t00172.1  
 Csi-miR396b.3

Csi-miR396b.3, target=Orange1.1t02555.1 gene=Orange1.1t02555  
 Category:1  
 Score=3  
 Cleavage Site=920



|    |                                 |    |                   |
|----|---------------------------------|----|-------------------|
| 5' | CACGUUCAAGAAAGCCUGUGGAACUU      | 3' | Orange1.1t02555.1 |
|    | : : : : : : : : : : : : : : : : |    |                   |
| 3' | -UUCAAGUUCUUUC-GACACCUU---      | 5' | Csi-miR396b.3     |

Csi-miR396b.3, target=Orange1.1t03122.1 gene=Orange1.1t03122  
 Category:1  
 Score=4  
 Cleavage Site=583

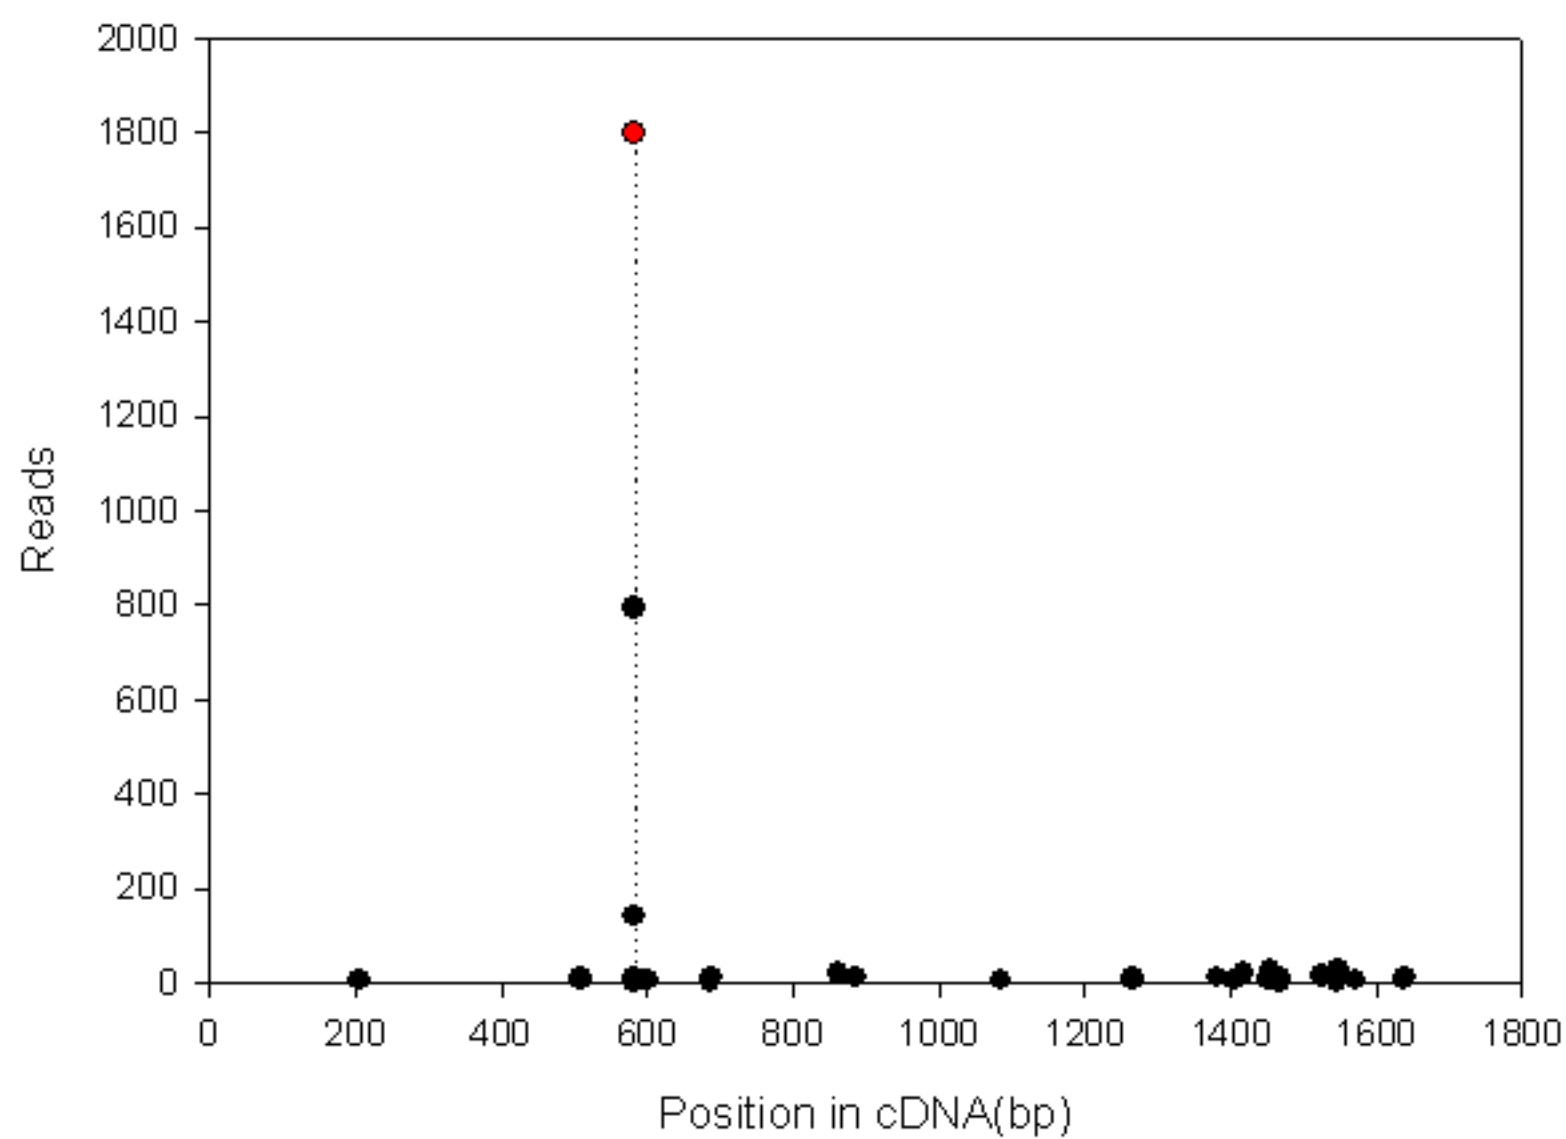

5' ACCGUUCAAGAAAGCCUGUGGAAUCA 3'  
 :::::::::::::: ::::::::::::::  
 3' -UUCAAGUUCUUUC-GACACCUU--- 5'

Orange1.1t03122.1

Csi-miR396b.3

Csi-miR396b-3p.2, target=Cs2g01990.1 gene=Cs2g01990  
 Category:3  
 Score=5  
 Cleavage Site=1431

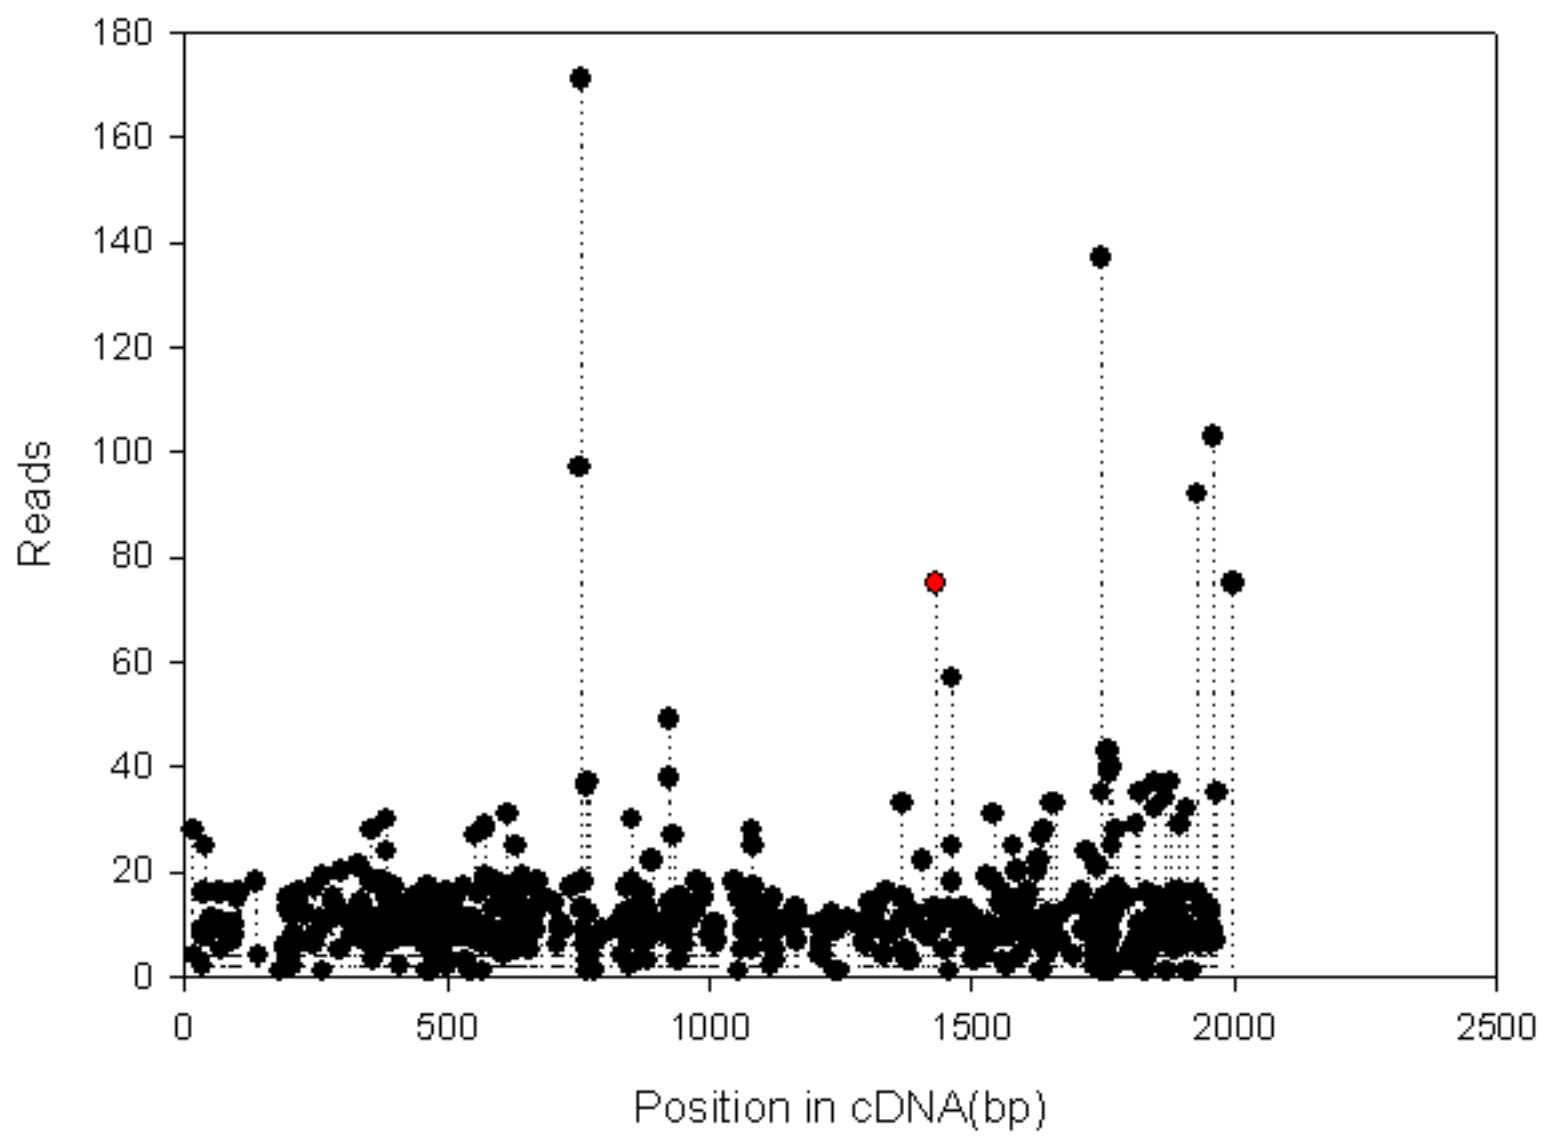

```

5' AUUCUUUCACAGGUUCCUUGAGACAC 3'      Cs2g01990.1
   ::::::::::: :: :::::::
3' --AGAGGGUGUCGAAAGAACUC---- 5'      Csi-miR396b-3p.2

```

Csi-miR396d.1, target=Cs1g21350.1 gene=Cs1g21350  
 Category:1  
 Score=3.5  
 Cleavage Site=1164



5' ACCGUUCAAGAAAGCCUGUGGAAGGC 3'  
 .....  
 3' --UCAAGUUCUUUCGG-CACCUUU-- 5'

Cs1g21350.1

Csi-miR396d.1

Csi-miR396d.1, target=Cs1g22520.1 gene=Cs1g22520  
 Category:1  
 Score=4  
 Cleavage Site=226



```

5' GAAGUUCAAGAAAUCUGUGGGAAGAA 3'      Cs1g22520.1
   ::::::::::: :::::::::::
3' --UCAAGUUCUUUCGGCACCUUU--- 5'      Csi-miR396d.1
  
```

Csi-miR396d.1, target=Cs3g23180.1 gene=Cs3g23180  
 Category:1  
 Score=4.5  
 Cleavage Site=625

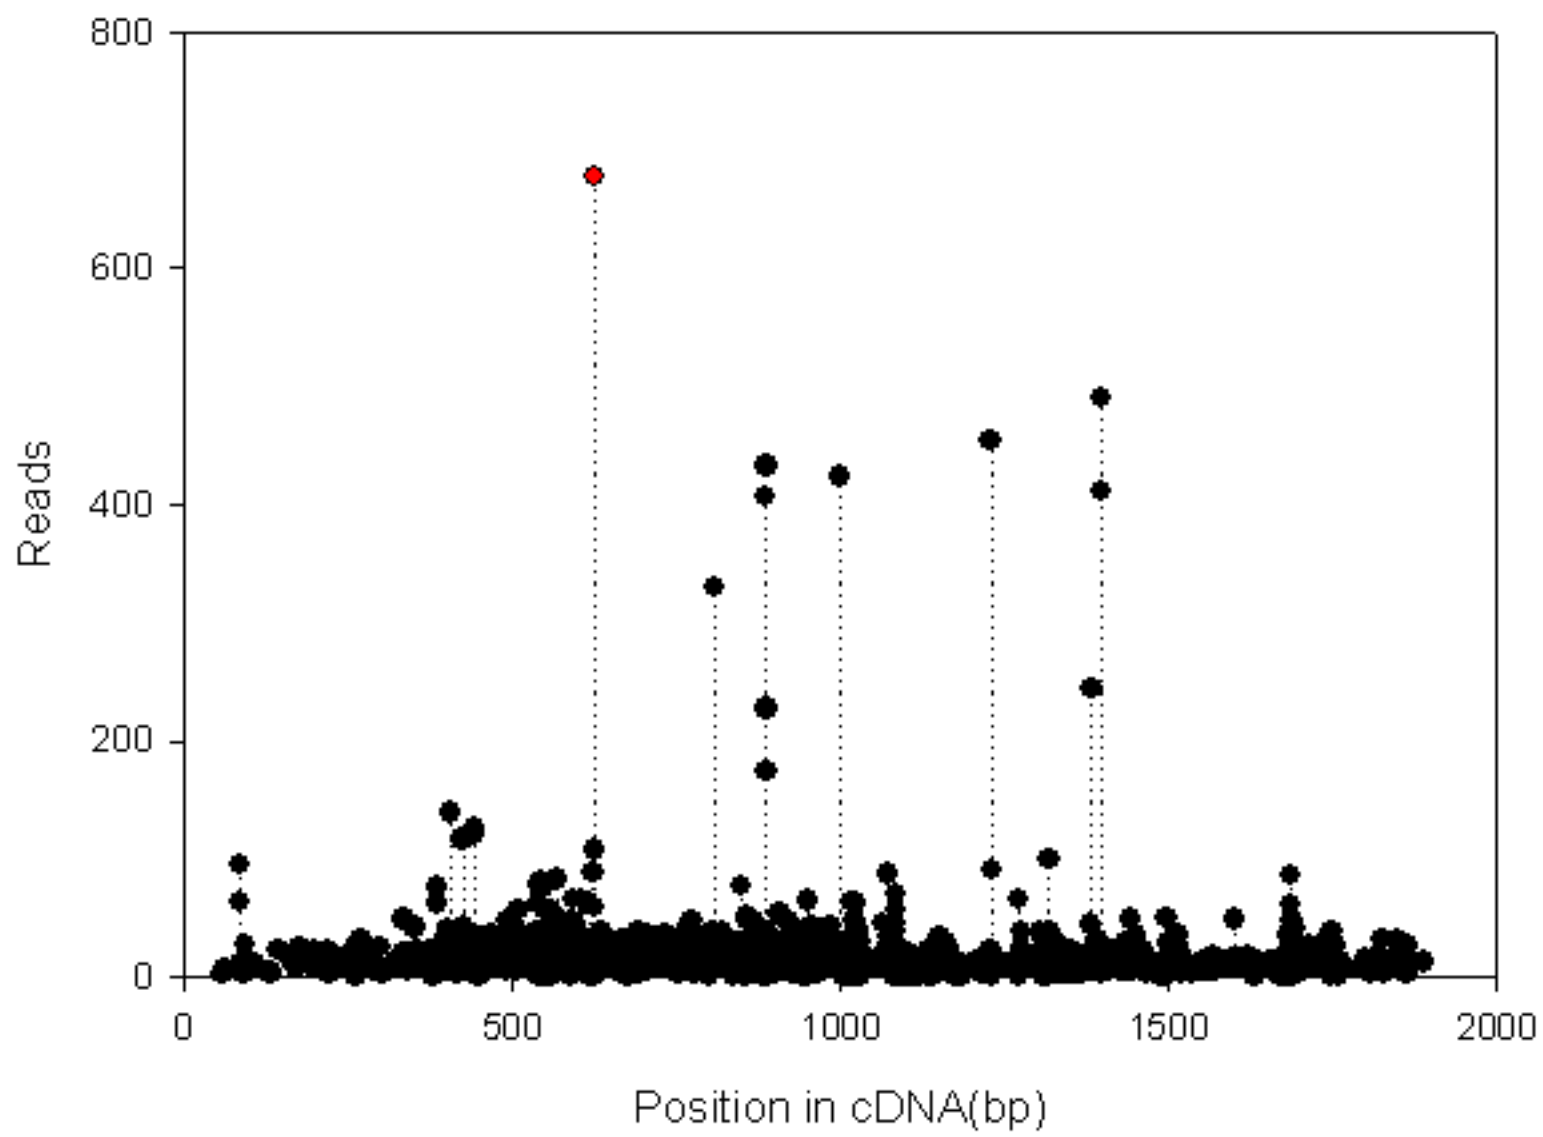

```

5' AAAGAUCAAGGAAGCUGUGGGAGUUG 3'      Cs3g23180.1
   :: ::::: ::::: ::::: ::::: :::::
3' --UCAAGUUCUUUCGGCACCUUU--- 5'      Csi-miR396d.1

```



Csi-miR396d.1, target=Cs4g12200.1 gene=Cs4g12200  
 Category:3  
 Score=4.5  
 Cleavage Site=228

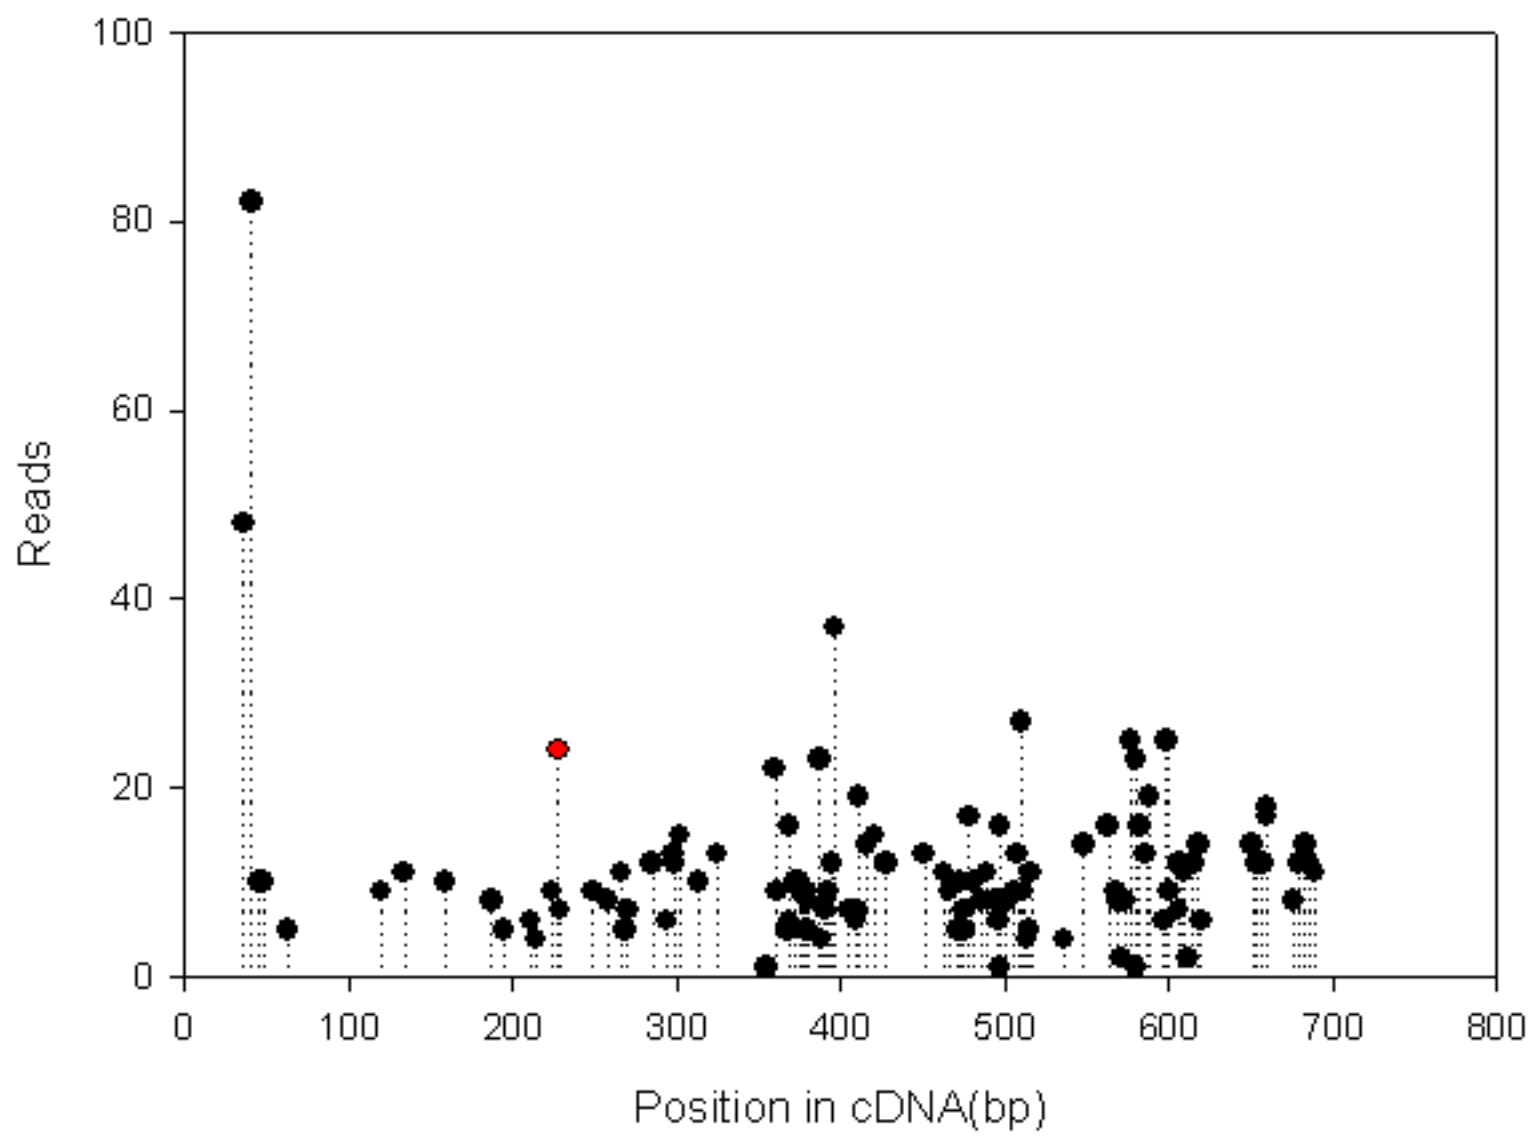

```

5' GGUUCCUGAAAGCCG-GGAAAUAUGCU 3'      Cs4g12200.1
   .: .: .: .: .: .: .: .: .: .: .:
3' UCAAGUUCUUUCGGCACC UU----- 5'      Csi-miR396d.1
  
```

Csi-miR396d.1, target=Cs5g01380.1 gene=Cs5g01380  
 Category:1  
 Score=4  
 Cleavage Site=1181



5' CCCGUUCAAGAAAGCCUGUGGAAUUA 3'  
 :::::::::::::::::::: :::::::  
 3' --UCAAGUUCUUUCGG-CACCUUU-- 5'

Cs5g01380.1

Csi-miR396d.1

Csi-miR396d.1, target=Cs5g09850.1 gene=Cs5g09850  
Category:3  
Score=4.5  
Cleavage Site=767

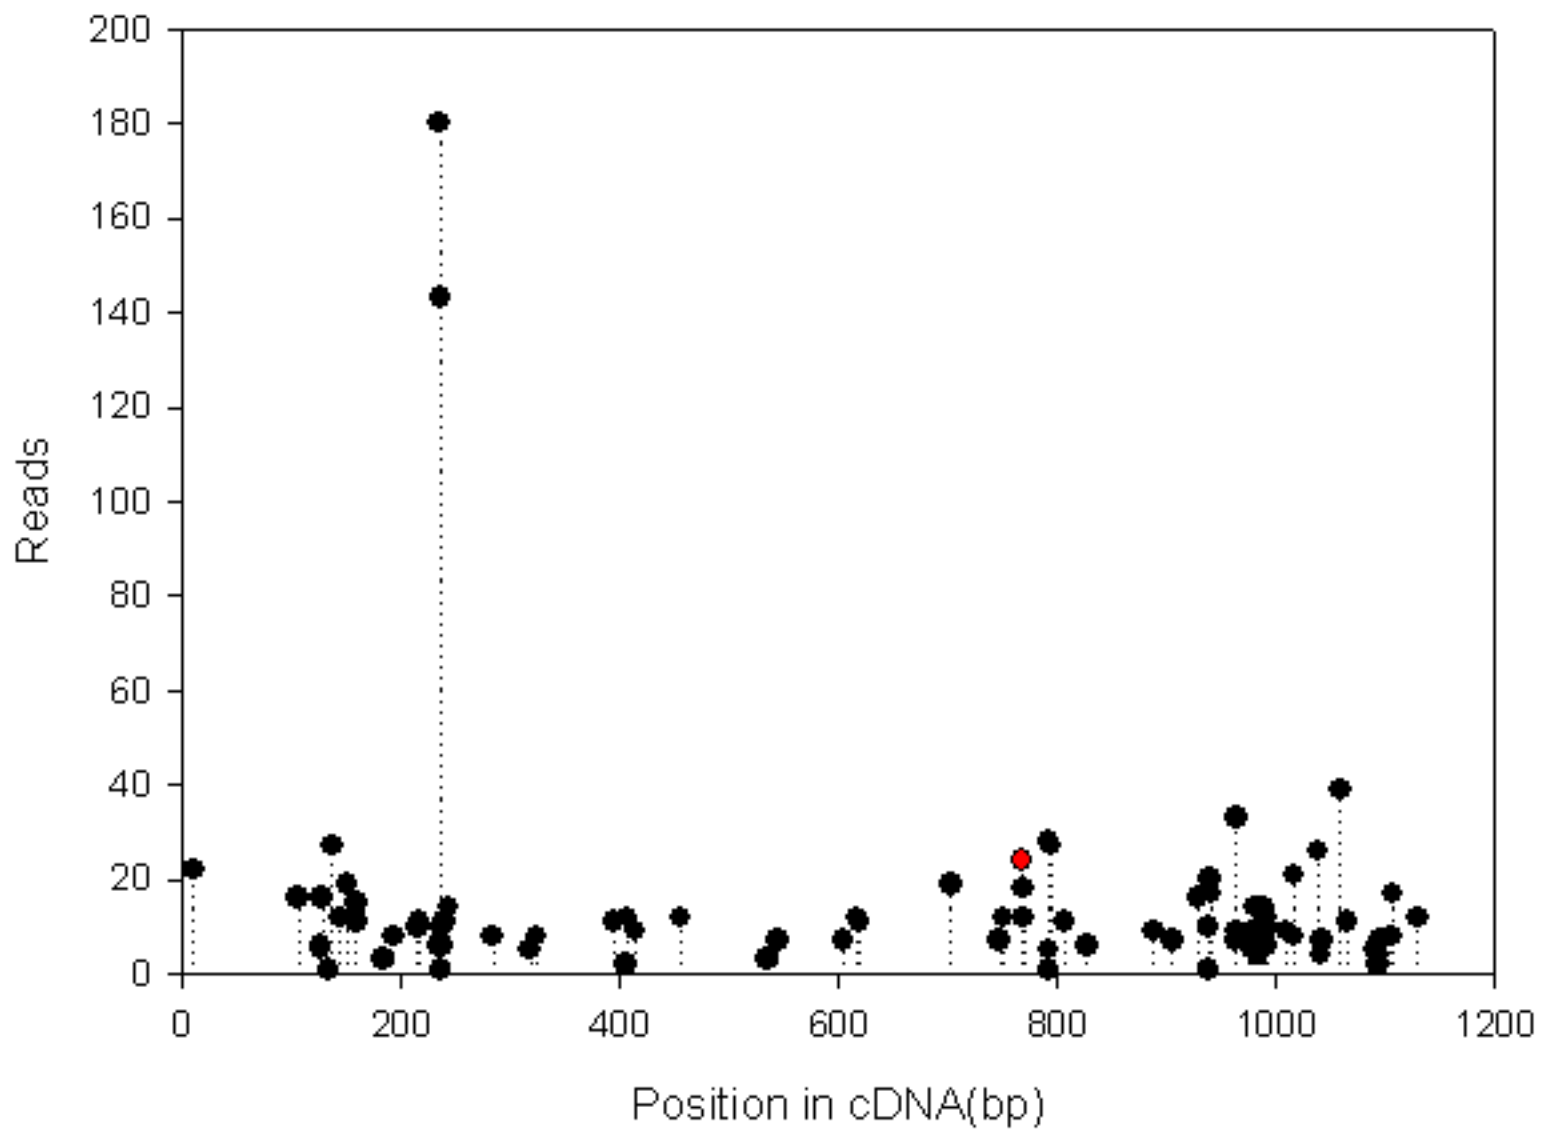

```
5' UGCGUUCAAGAAAGCUUGUGGAAGCU 3'          Cs5g09850.1  
    ::::::::::::::.:::::  
3' --UCAAGUUCUUUCG-GCACCUUU-- 5'          Csi-miR396d.1
```

Csi-miR396d.1, target=Cs7g15220.1 gene=Cs7g15220  
 Category:1  
 Score=4  
 Cleavage Site=377

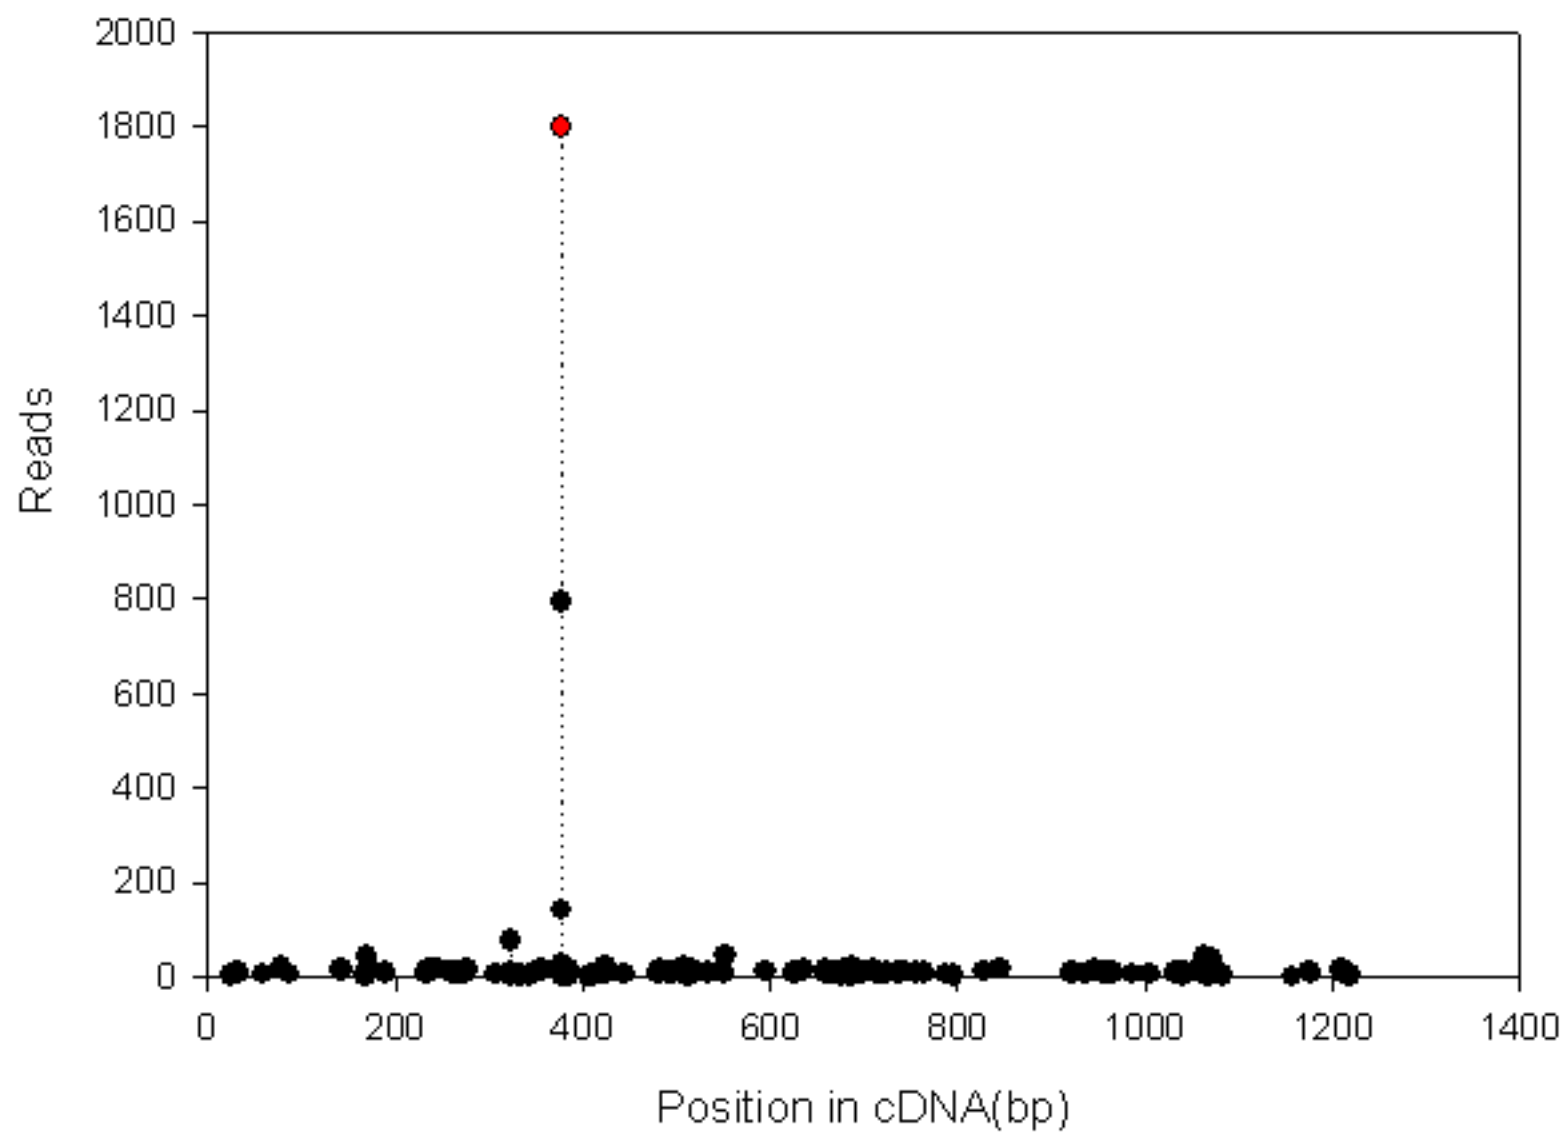

```

5' ACCGUUCAAGAAAGCCUGUGGAAUCA 3'
   ::::::::::::::: :::::
3' --UCAAGUUCUUUCGG-CACCUUU-- 5'
  
```

Cs7g15220.1

Csi-miR396d.1

Csi-miR396d.1, target=Cs8g17370.1 gene=Cs8g17370  
 Category:3  
 Score=4  
 Cleavage Site=140

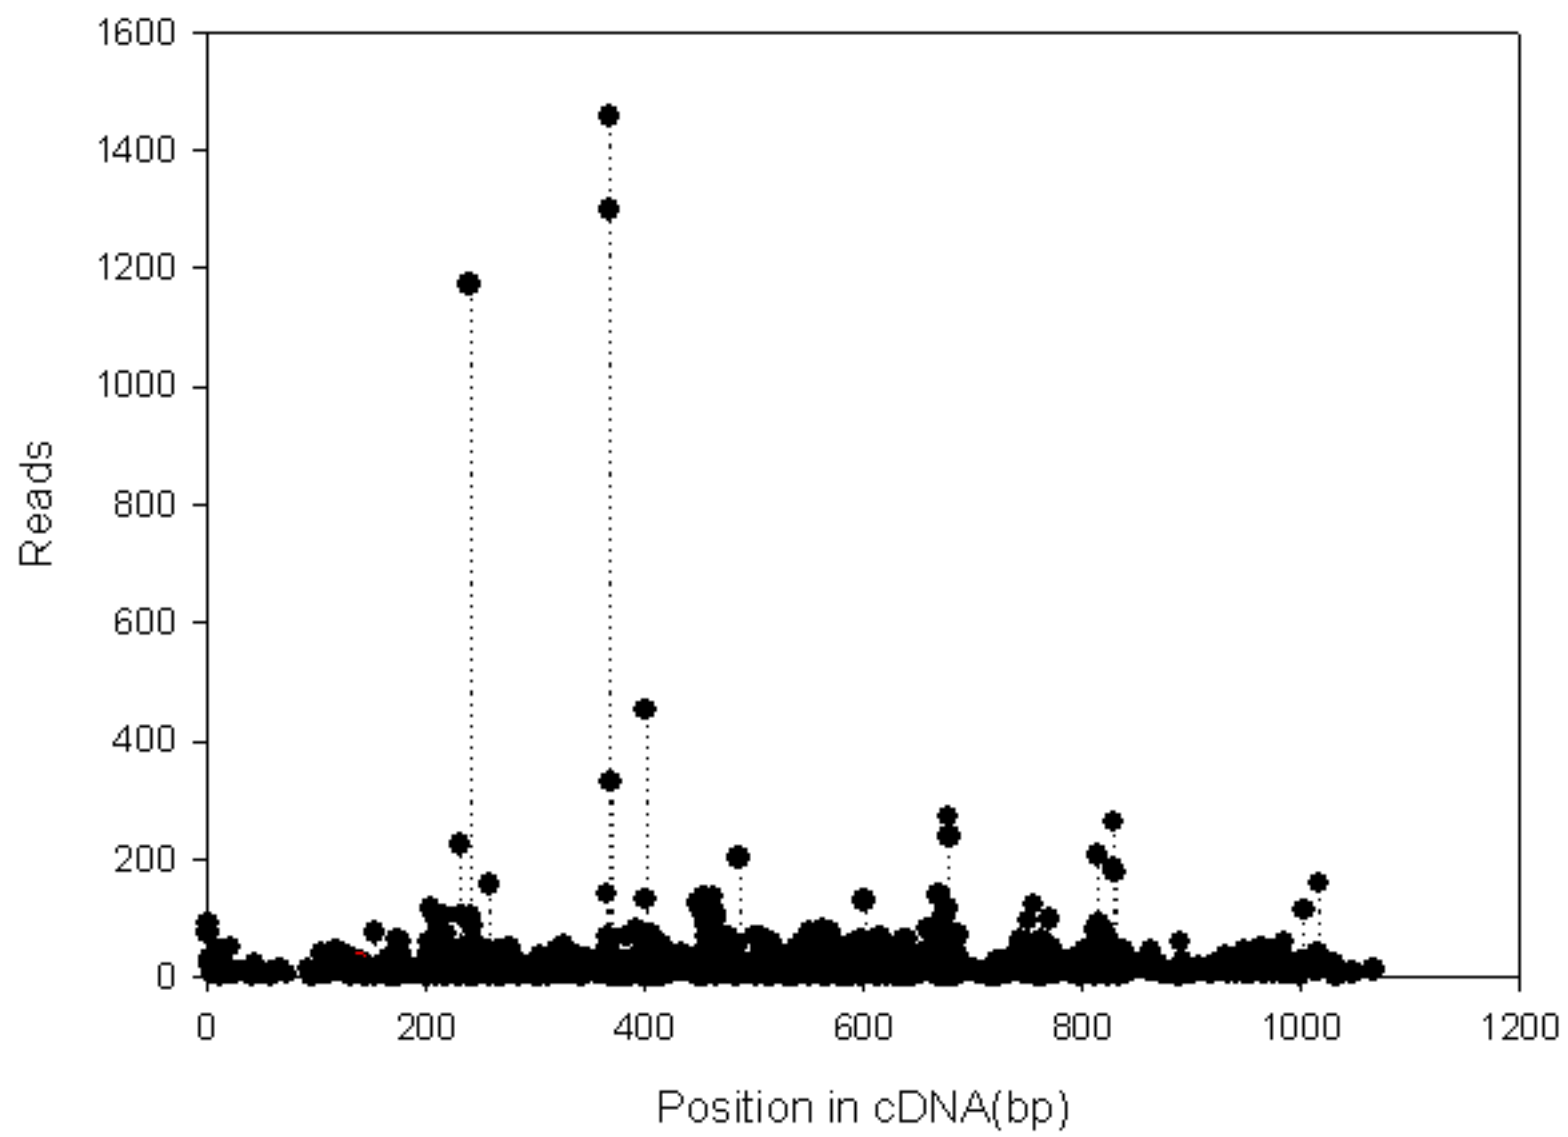

```
5' AGGAUUACAAGAAGGCCGUGGAGAAA 3'
   : : : : : : : : : : : : : : :
3' ---UCAAGUUCUUUCGGCACC UU-- 5'
```

Cs8g17370.1

Csi-miR396d.1

Csi-miR396d.1, target=Orange1.1t00172.1 gene=Orange1.1t00172  
 Category:1  
 Score=4  
 Cleavage Site=656



```

5' ACCGUUCAAGAAAGCCUGUGGAACUU 3'
   :::::::::::::::::::: :::::
3' --UCAAGUUCUUUCGG-CACCUUU-- 5'
  
```

```

Orange1.1t00172.1
Csi-miR396d.1
  
```

Csi-miR396d.1, target=Orange1.1t02555.1 gene=Orange1.1t02555  
 Category:1  
 Score=4  
 Cleavage Site=920



```

5' CACGUUCAAGAAAGCCUGUGGAACUU 3'      Orange1.1t02555.1
   : : : : : : : : : : : : : : : :
3' --UCAAGUUCUUUCGG-CACCUUU-- 5'      Csi-miR396d.1
  
```

Csi-miR396d.1, target=Orange1.1t03122.1 gene=Orange1.1t03122  
 Category:1  
 Score=4  
 Cleavage Site=583



```

5' ACCGUUCAAGAAAGCCUGUGGAAUCA 3'
   : : : : : : : : : : : : : : :
3' --UCAAGUUCUUUCGG-CACCUUU-- 5'
  
```

Orange1.1t03122.1  
 Csi-miR396d.1



Csi-miR396d.2, target=Cs1g21350.1 gene=Cs1g21350  
 Category:1  
 Score=4  
 Cleavage Site=1164



5' ACCGUUCAAGAAAGCCUGUGGAAGGC 3'  
 :::::::::::::::::::: :::::::  
 3' -UUCAAGUUCUUUCGG-CACCUU--- 5'

Cs1g21350.1  
 Csi-miR396d.2

Csi-miR396d.2, target=Cs1g22520.1 gene=Cs1g22520  
 Category:1  
 Score=4  
 Cleavage Site=226

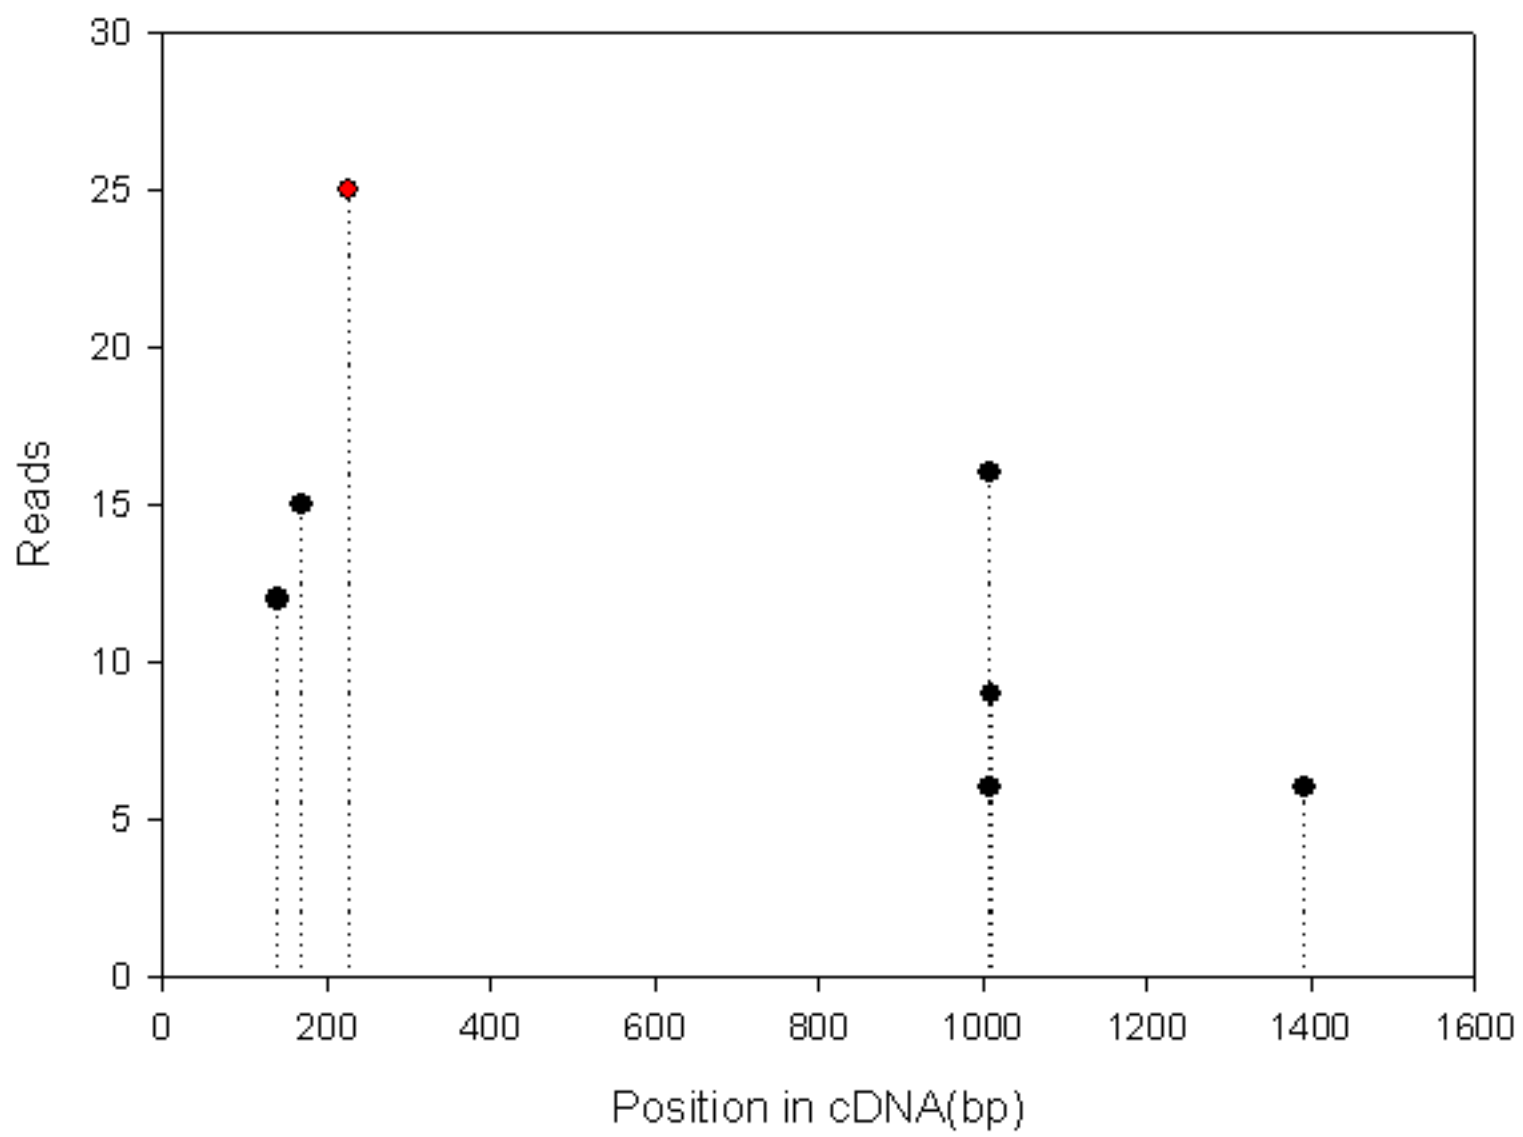

```

5' GAAGUUCAAGAAAUCUGUGGGAAGAA 3'      Cs1g22520.1
   : : : : : : : : : : : : : : : :
3' -UUCAAGUUCUUUCGGCACCUU----- 5'    Csi-miR396d.2
  
```

Csi-miR396d.2, target=Cs2g09620.1 gene=Cs2g09620  
 Category:3  
 Score=5  
 Cleavage Site=3513

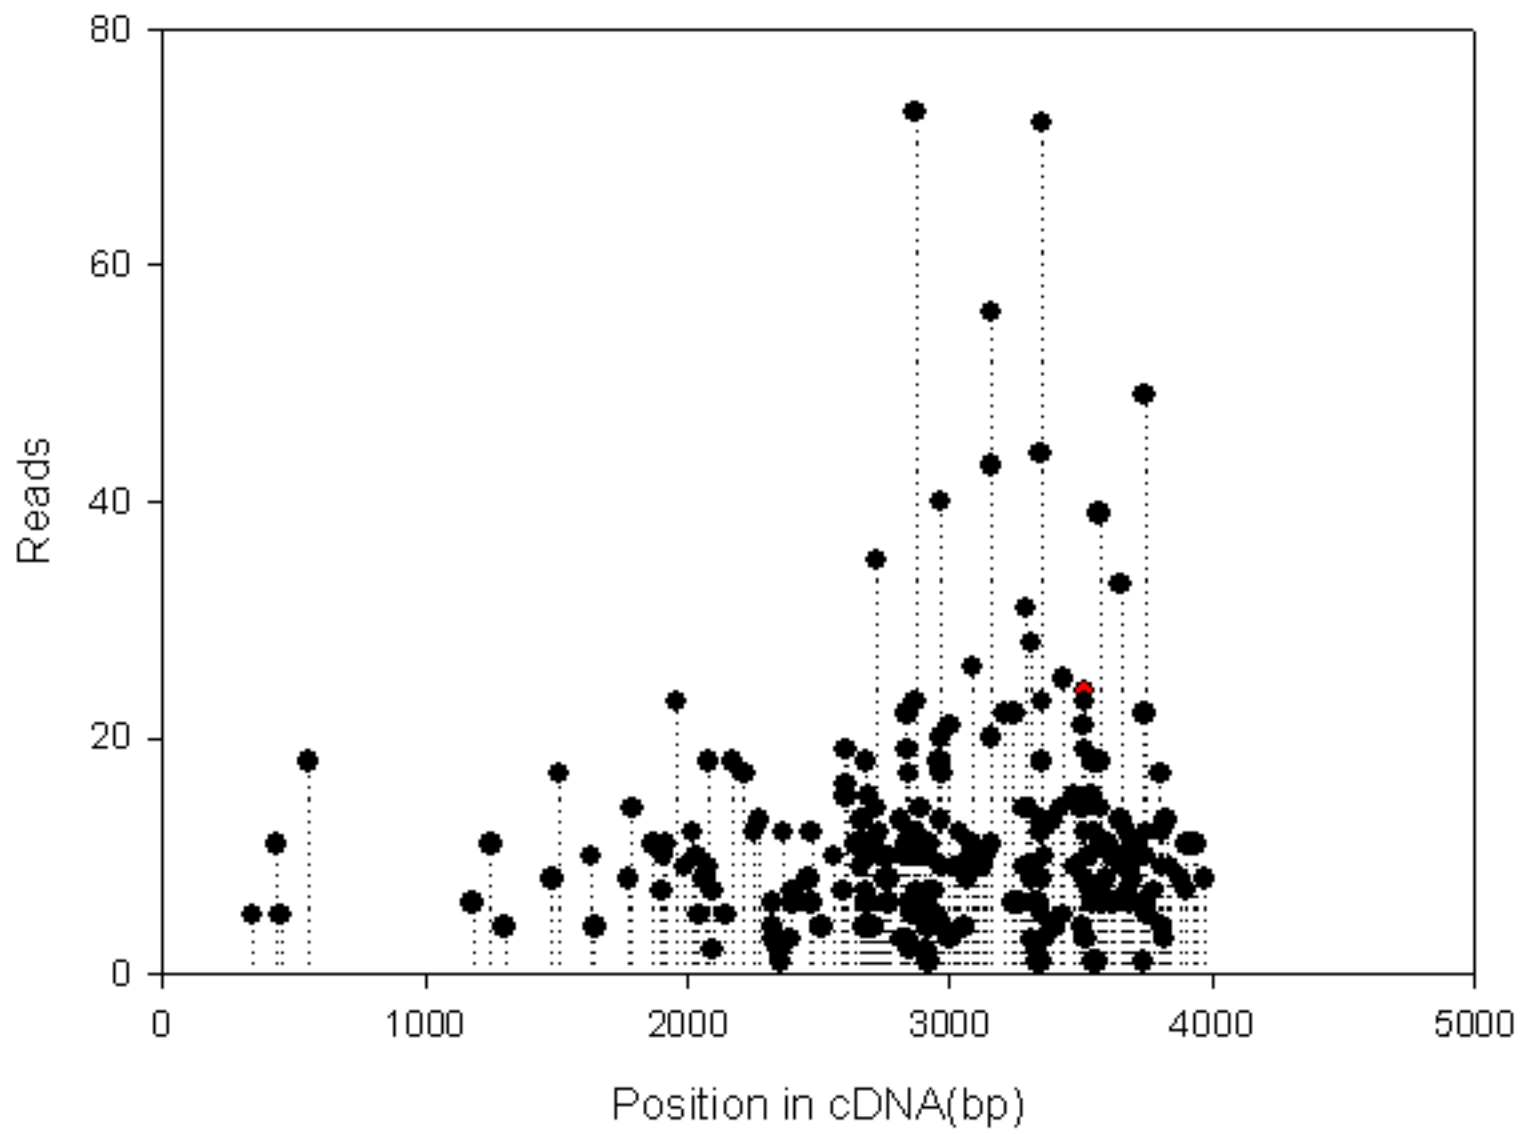

```

5' AAGUAC-UGAAAUCCGUGGAACUUUUG 3'      Cs2g09620.1
   :   :   :   :   :   :   :   :
3' UUCAAGUUCUUUCGGCACCUU----- 5'      Csi-miR396d.2

```

Csi-miR396d.2, target=Cs3g23180.1 gene=Cs3g23180  
 Category:1  
 Score=4  
 Cleavage Site=625

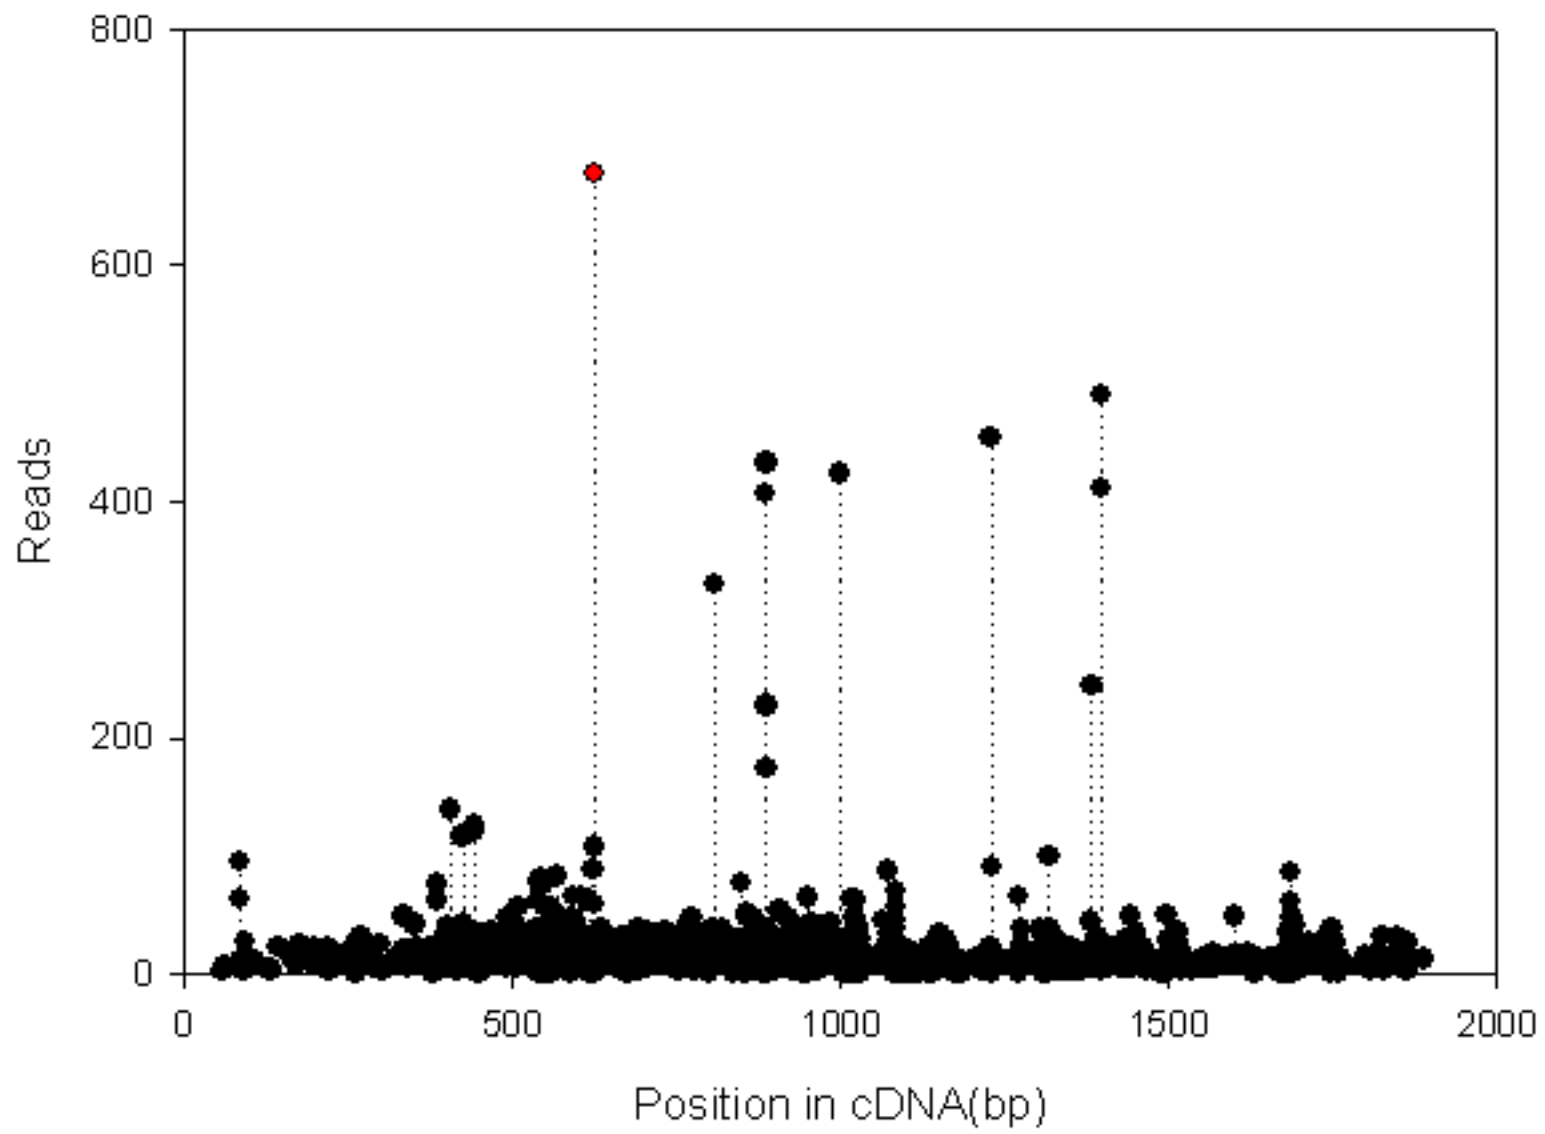

```

5' AAAGAUCAAGGAAGCUGUGGGAGUUG 3'      Cs3g23180.1
   ::: :.:.:.:.:.:.:.:.:.:.:.
3' -UUCAAGUUCUUUCGGCACCUU---- 5'      Csi-miR396d.2
  
```

Csi-miR396d.2, target=Cs5g01380.1 gene=Cs5g01380  
 Category:1  
 Score=4  
 Cleavage Site=1181



5' CCCGUUCAAGAAAGCCUGUGGAAUUA 3'  
 :::::::::::::::::::: :::::::  
 3' -UUCAAGUUCUUUCGG-CACCUU--- 5'

Cs5g01380.1

Csi-miR396d.2

Csi-miR396d.2, target=Cs5g09850.1 gene=Cs5g09850  
 Category:3  
 Score=4.5  
 Cleavage Site=767



```

5' UGCGUUCAAGAAAGCUUGUGGAAGCU 3'          Cs5g09850.1
   . : : : : : : : : : : : : : : : : : : :
3' -UUCAAGUUCUUUCG-GCACCUU--- 5'          Csi-miR396d.2
  
```

Csi-miR396d.2, target=Cs7g15220.1 gene=Cs7g15220  
Category:1  
Score=4  
Cleavage Site=377

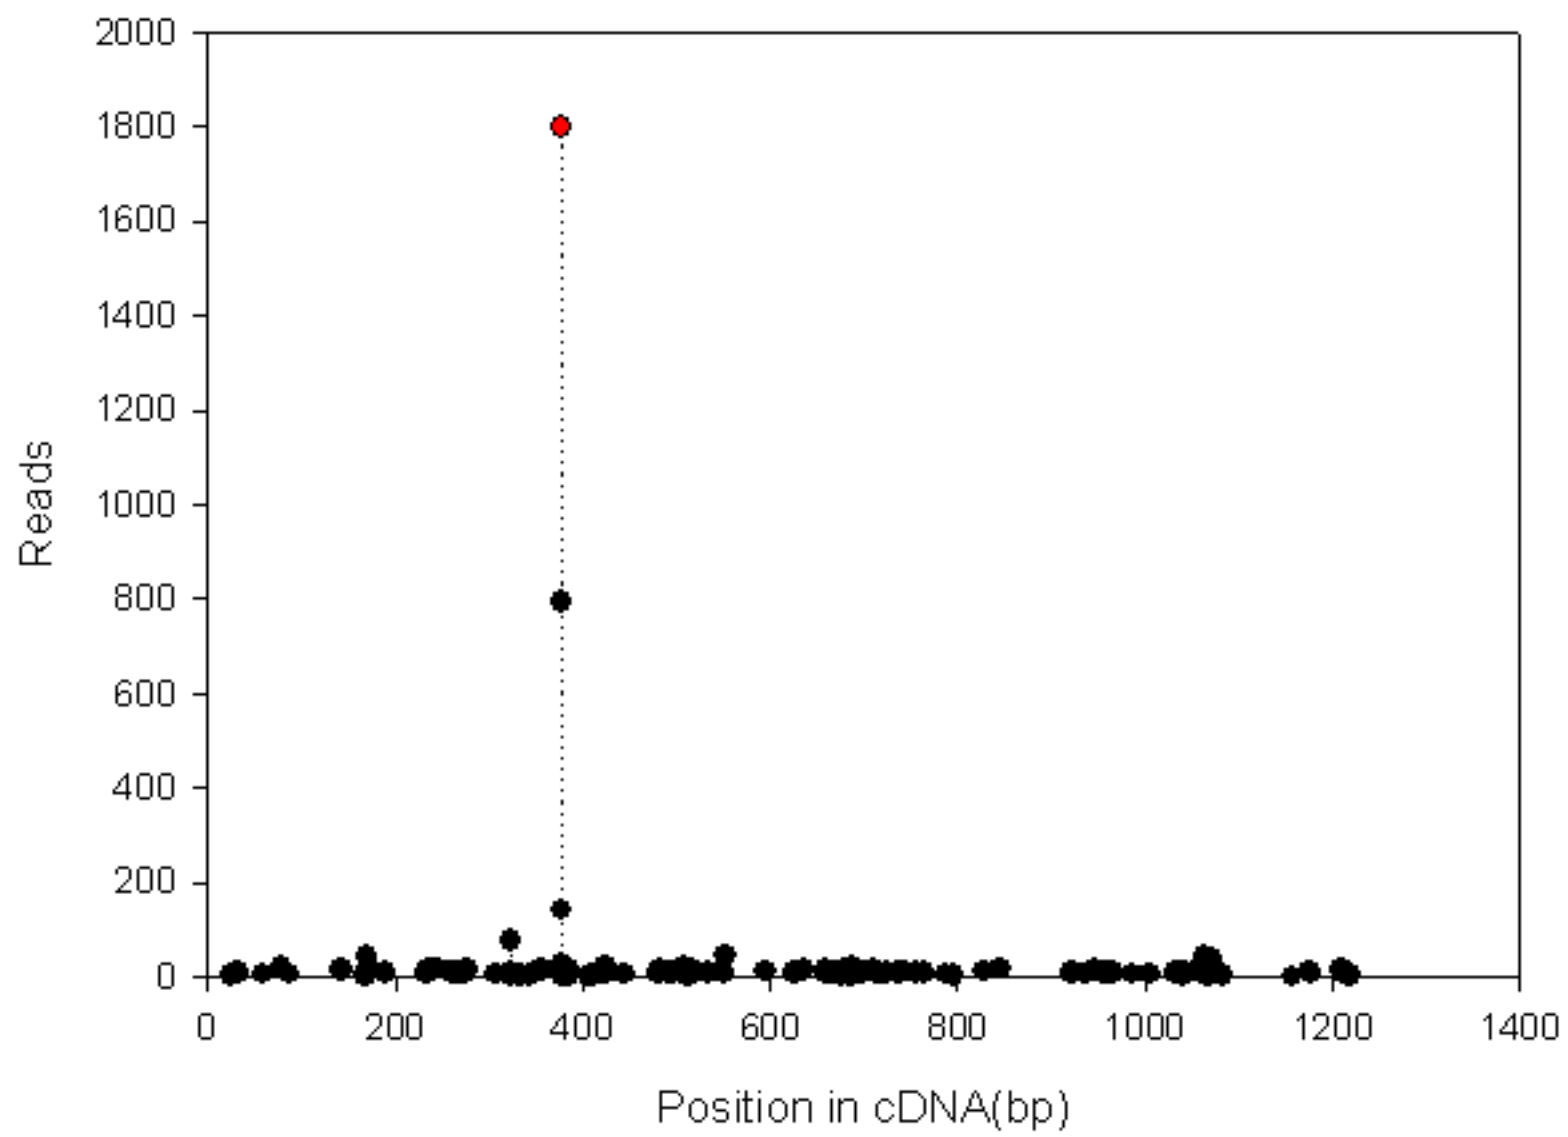

```
5' ACCGUUCAAGAAAGCCUGUGGAAUCA 3'          Cs7g15220.1
   :::::::::::::::::::: :
3' -UUCAAGUUCUUUCGG-CACCUU--- 5'          Csi-miR396d.2
```

Csi-miR396d.2, target=Cs8g17370.1 gene=Cs8g17370  
 Category:3  
 Score=4  
 Cleavage Site=140



```

5' AGGAUUACAAGAAGGCCGUGGAGAAA 3'      Cs8g17370.1
   . : : : : : : : : : : : : : .
3' --UUCAAGUUCUUUCGGCACCUU--- 5'      Csi-miR396d.2

```



Csi-miR396d.2, target=Orange1.1t00172.1 gene=Orange1.1t00172  
 Category:1  
 Score=4  
 Cleavage Site=656

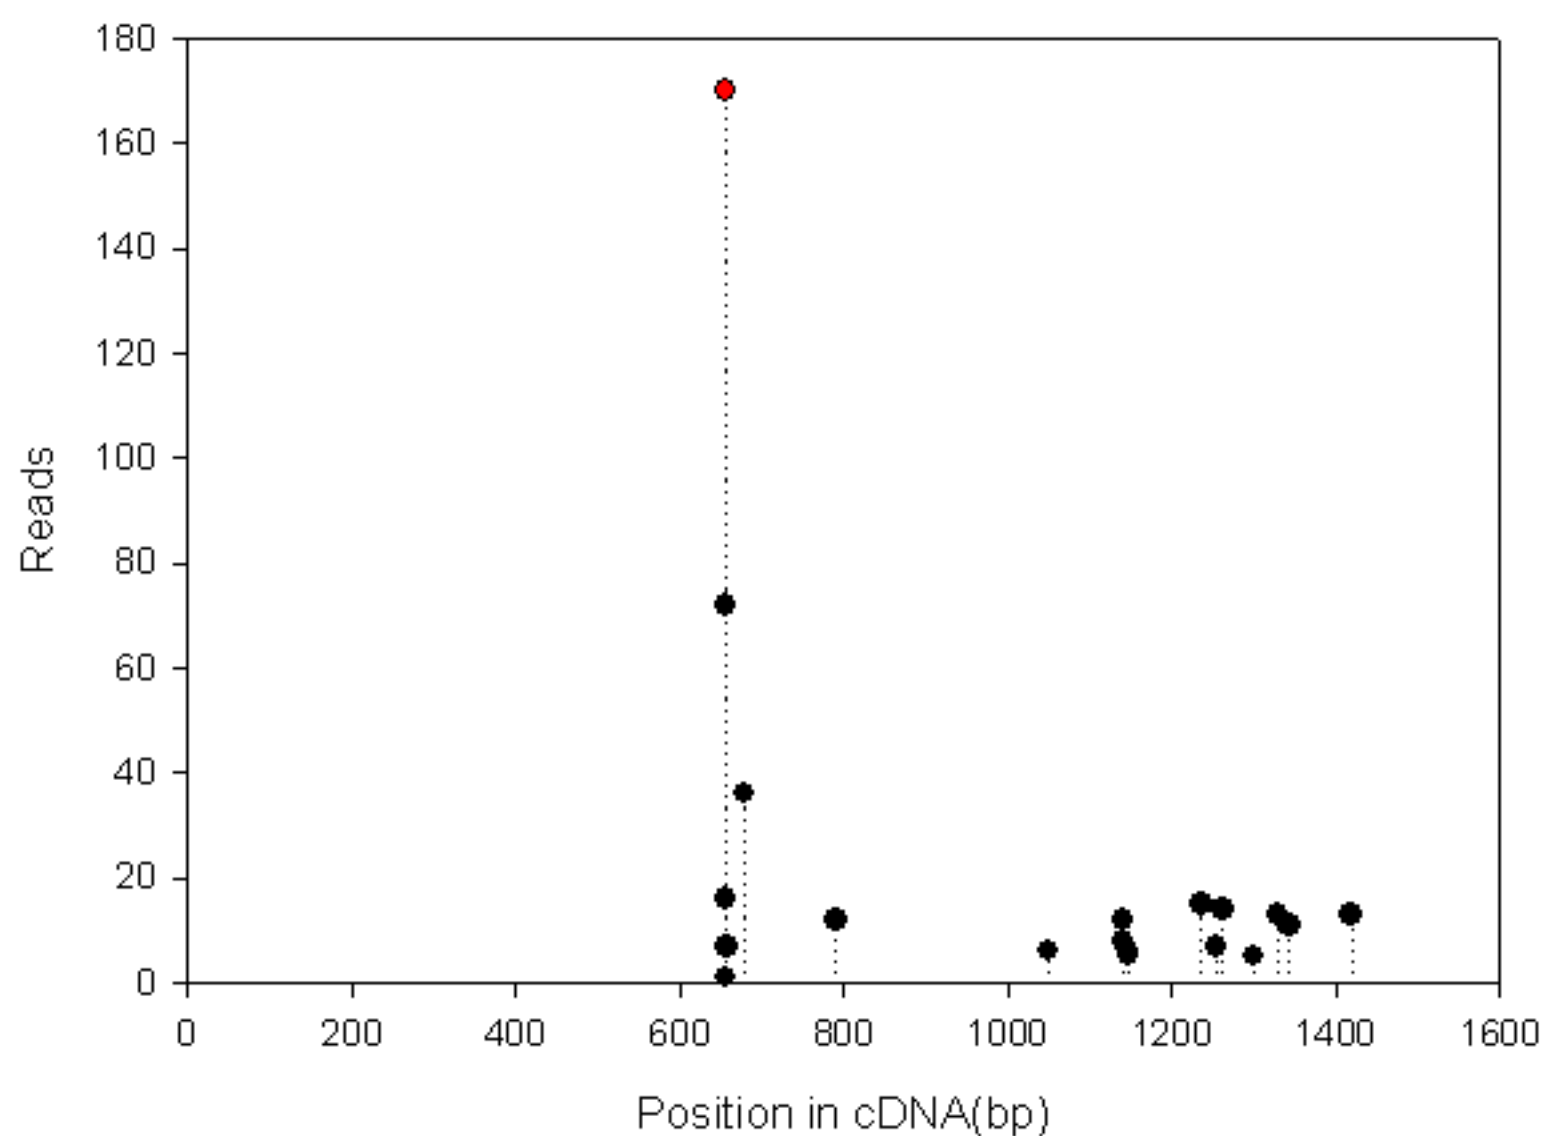

5' ACCGUUCAAGAAAGCCUGUGGAACUU 3'  
 :::::::::::::::::::: :::::::  
 3' -UUCAAGUUCUUUCGG-CACCUU--- 5'

Orange1.1t00172.1  
 Csi-miR396d.2

Csi-miR396d.2, target=Orange1.1t02555.1 gene=Orange1.1t02555  
 Category:1  
 Score=3  
 Cleavage Site=920



|    |                                 |    |                   |
|----|---------------------------------|----|-------------------|
| 5' | CACGUUCAAGAAAGCCUGUGGAACUU      | 3' | Orange1.1t02555.1 |
|    | : : : : : : : : : : : : : : : : |    |                   |
| 3' | -UUCAAGUUCUUUCGG-CACCUU---      | 5' | Csi-miR396d.2     |

Csi-miR396d.2, target=Orange1.1t03122.1 gene=Orange1.1t03122  
 Category:1  
 Score=4  
 Cleavage Site=583



5' ACCGUUCAAGAAAGCCUGUGGAAUCA 3'  
 :::::::::::::: :::::  
 3' -UUCAAGUUCUUUCGG-CACCUU--- 5'

Orange1.1t03122.1  
 Csi-miR396d.2

Csi-miR396d.3, target=Cs1g15720.1 gene=Cs1g15720  
 Category:3  
 Score=5  
 Cleavage Site=1610

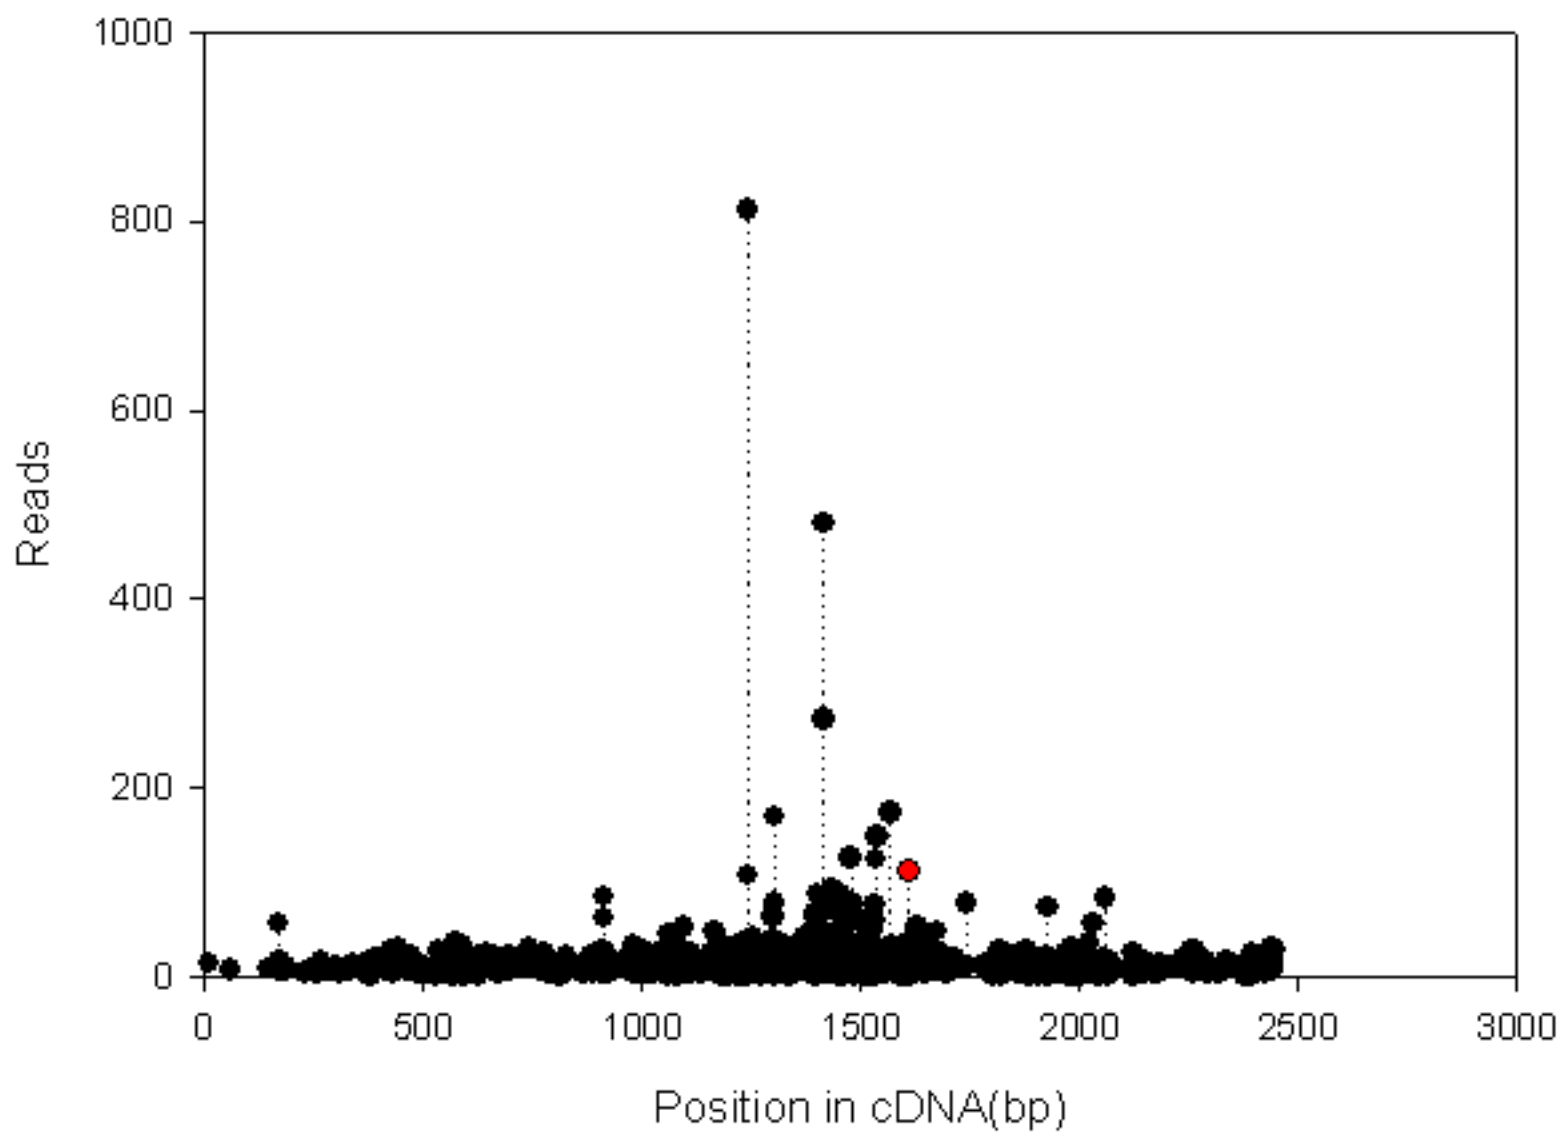

```

5' CAACAUUCAA-AAAGCCGUGGGCUCA 3'      Cs1g15720.1
      : : : : : : : : : : : : : :
3' -----CAAGUUCUUUCGGCACCUCU--- 5'    Csi-miR396d.3
  
```

Csi-miR396d.3, target=Cs1g21350.1 gene=Cs1g21350  
 Category:1  
 Score=2  
 Cleavage Site=1164

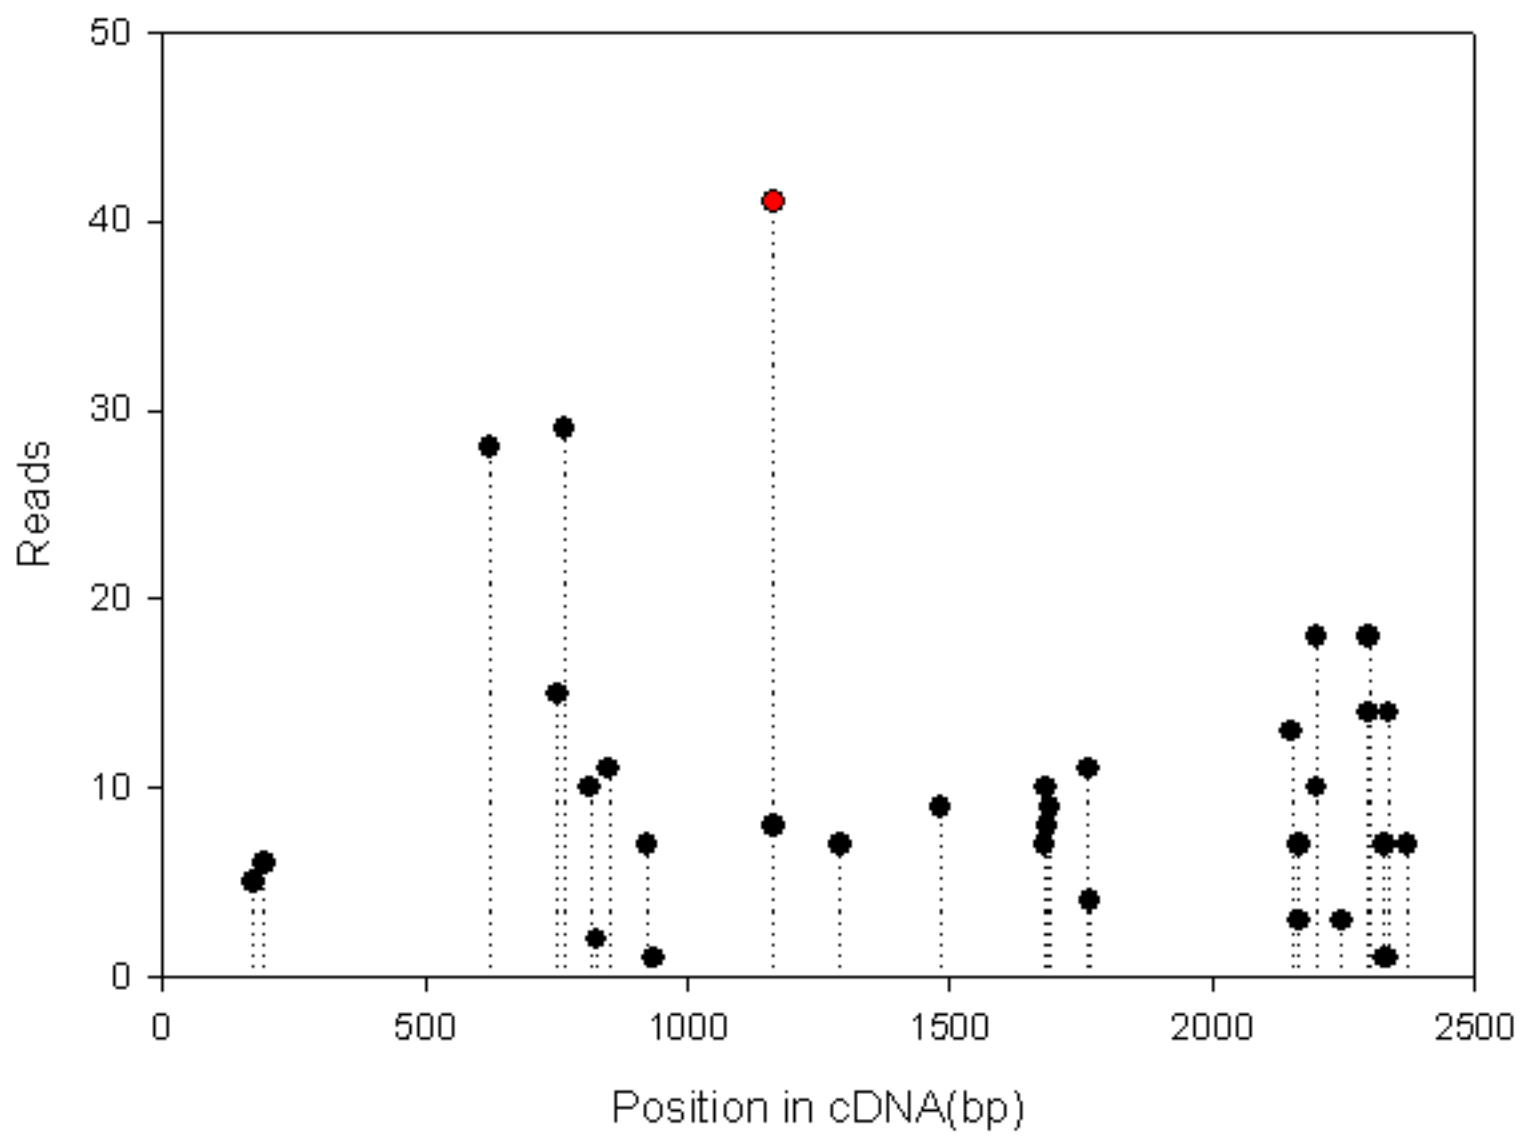

5' ACCGUUCAAGAAAGCCUGUGGAAGGC 3'

Cs1g21350.1

.....

3' ---CAAGUUCUUUCGG-CACCUU--- 5'

Csi-miR396d.3

Csi-miR396d.3, target=Cs1g22520.1 gene=Cs1g22520  
 Category:1  
 Score=4  
 Cleavage Site=226



5' GAAGUUCAAGAAAUCUGUGGGAAGAA 3'  
 ::::::::::: :::::::::::  
 3' ---CAAGUUCUUUCGGCACCUU---- 5'

Cs1g22520.1

Csi-miR396d.3

Csi-miR396d.3, target=Cs2g21180.1 gene=Cs2g21180  
Category:3  
Score=4.5  
Cleavage Site=600

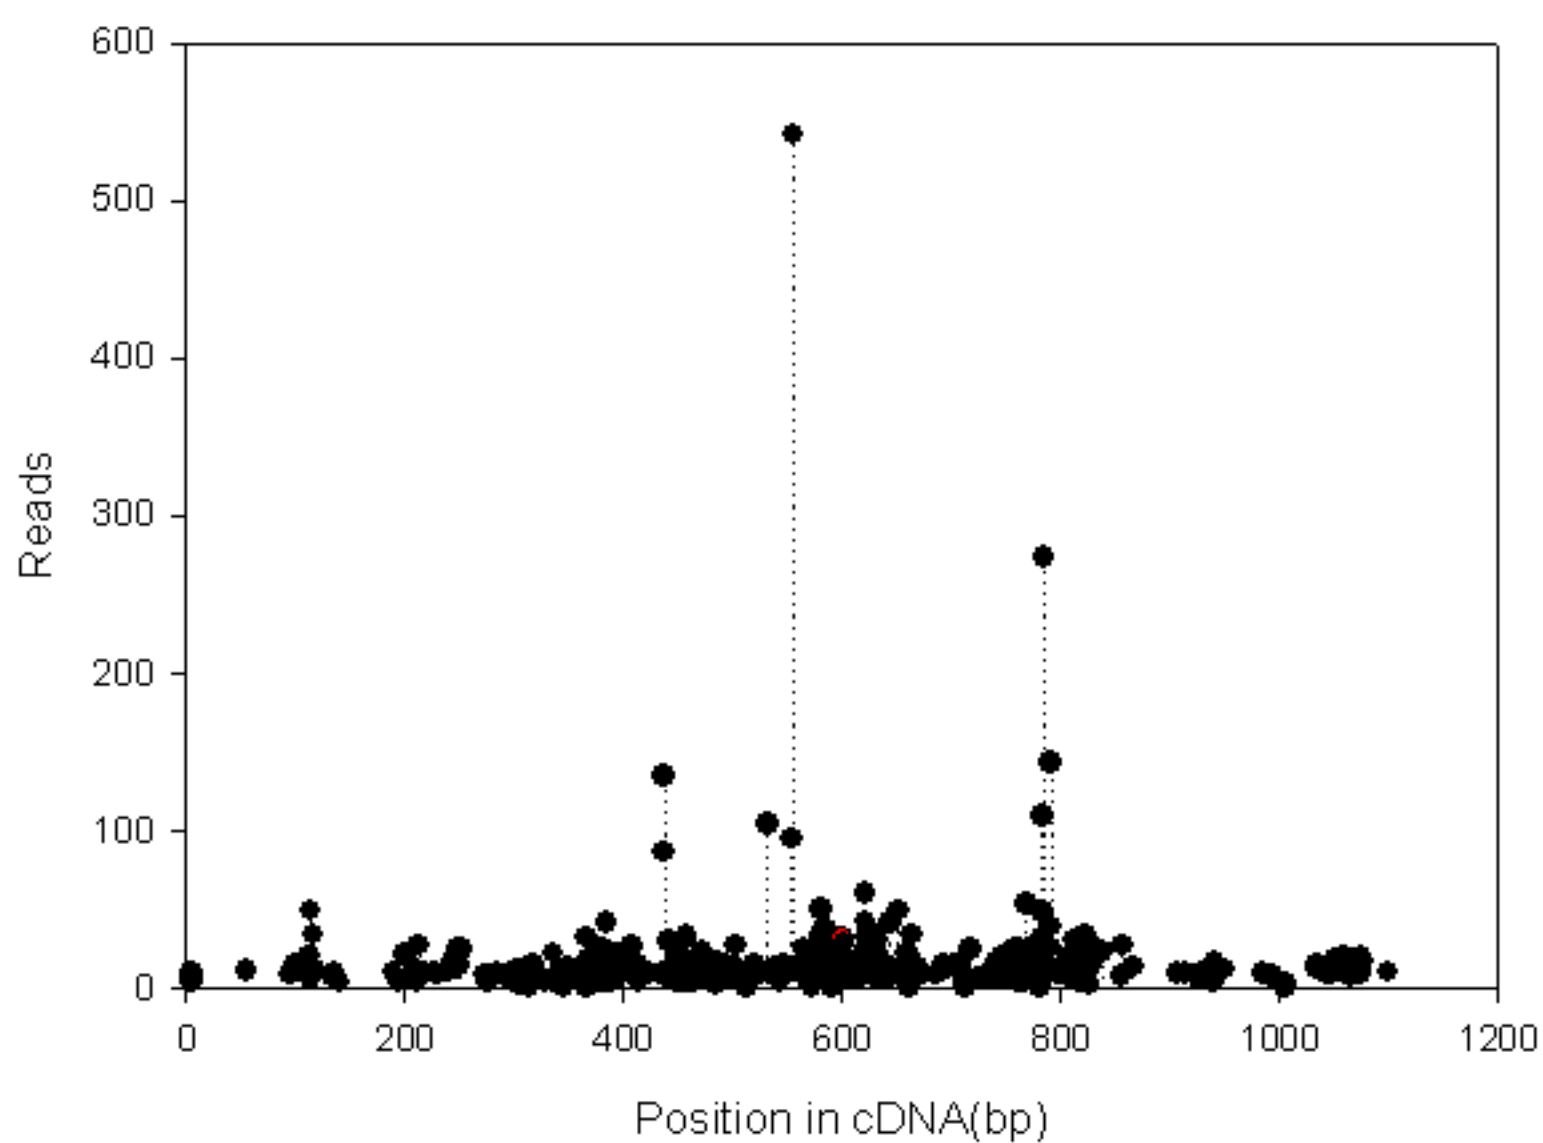

```
5' UCGAUUGCUCAGGAAGGCCAUGGAAG 3' Cs2g21180.1
   : : : : : : : : : : : : : : : :
3' -----CAAGUUCUUUCGGCACC UU- 5' Csi-miR396d.3
```

Csi-miR396d.3, target=Cs3g23180.1 gene=Cs3g23180  
 Category:1  
 Score=4  
 Cleavage Site=625



```

5' AAAGAUCAAGGAAGCUGUGGGAGUUG 3'      Cs3g23180.1
   : : : : : : : : : : : : : : : :
3' ---CAAGUUCUUUCGGCACCUU----- 5'    Csi-miR396d.3

```



Csi-miR396d.3, target=Cs4g05000.1 gene=Cs4g05000  
 Category:3  
 Score=4  
 Cleavage Site=1249

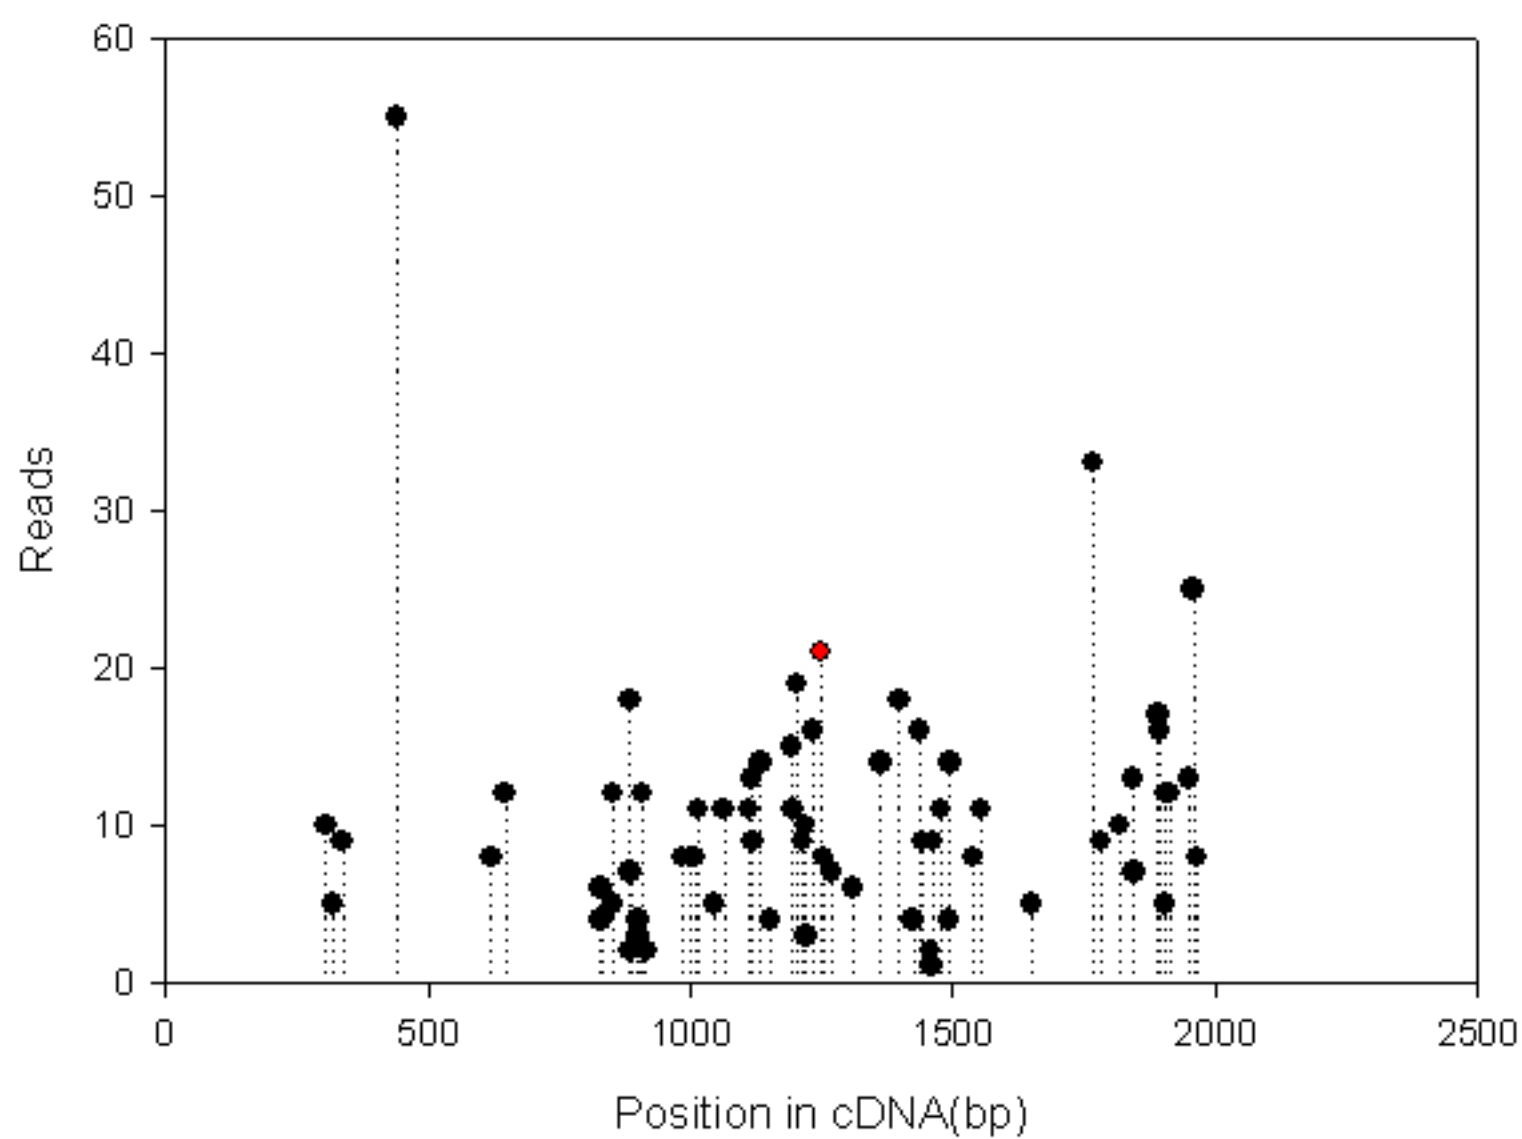

```

5' ACCCUUGAAGAAAGCUGUGGAUUAUAG 3'      Cs4g05000.1
   :: ::::::::::::::::::::
3' ---CAAGUUCUUUCGGCACCUU---- 5'      Csi-miR396d.3
  
```

Csi-miR396d.3, target=Cs4g12200.1 gene=Cs4g12200  
 Category:3  
 Score=4  
 Cleavage Site=228

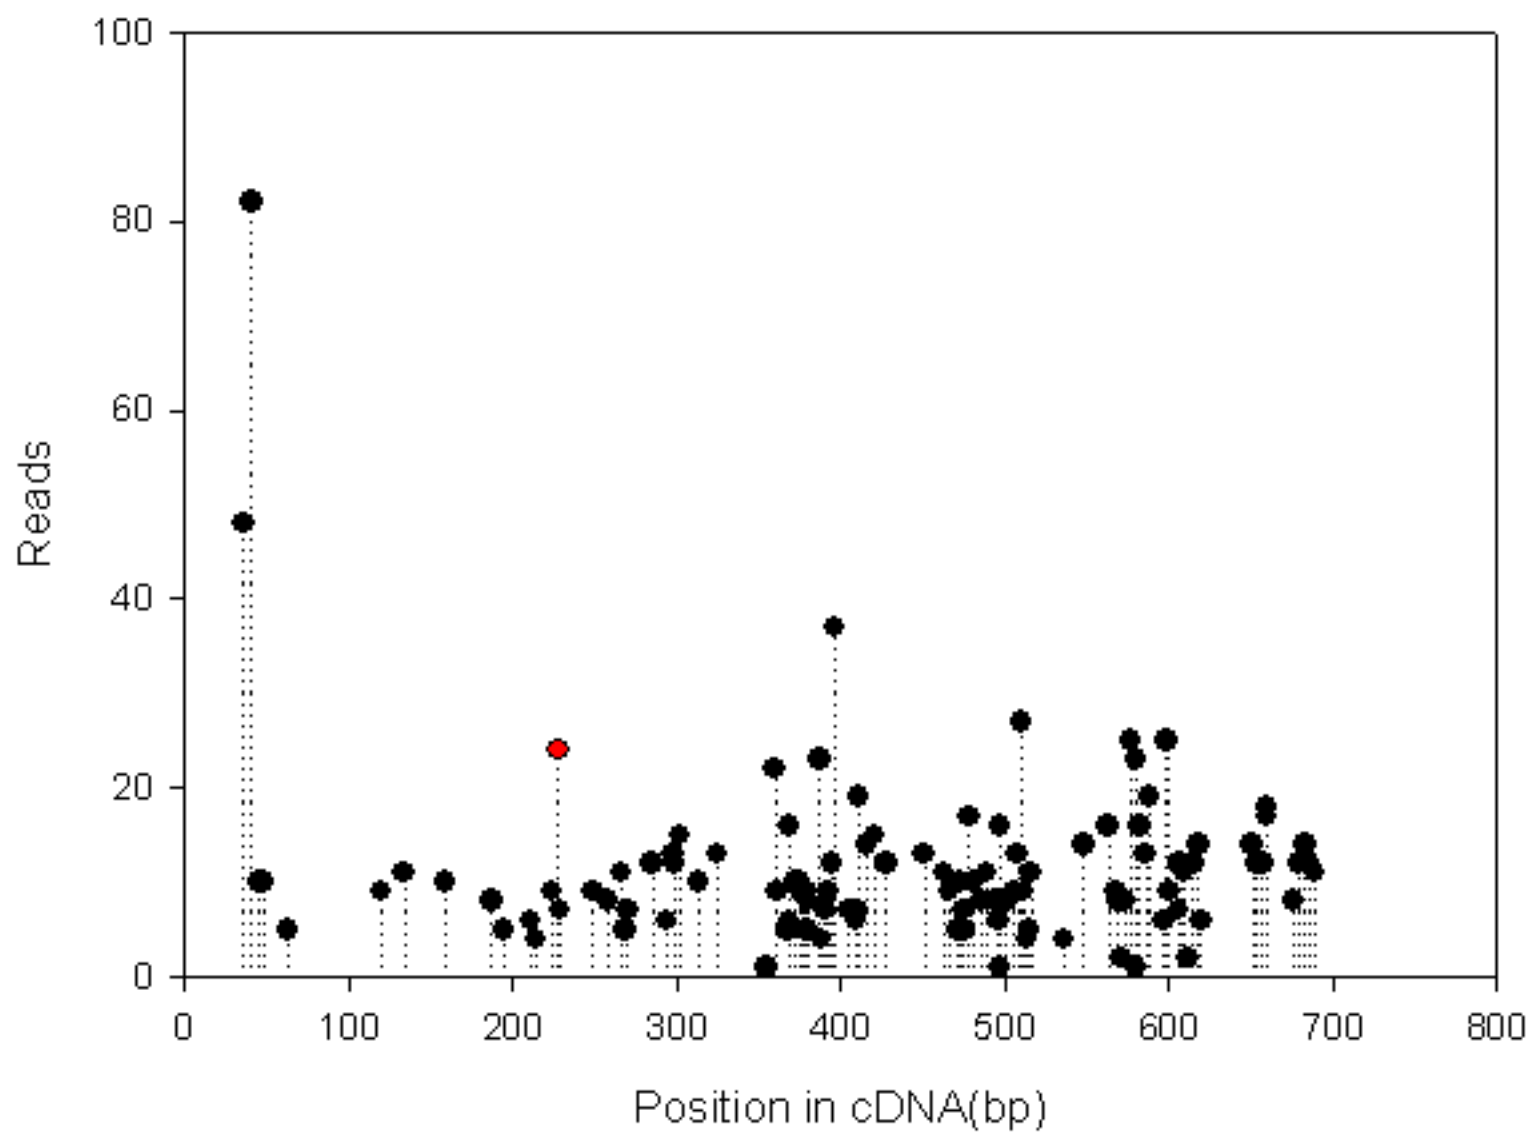

```

5' GGUUCCUGAAAGCCG-GGAAUAUGCU 3'      Cs4g12200.1
   : : : : : : : : : : : : : : : :
3' -CAAGUUCUUUCGGCACCUU----- 5'      Csi-miR396d.3
  
```

Csi-miR396d.3, target=Cs5g01380.1 gene=Cs5g01380  
 Category:1  
 Score=2  
 Cleavage Site=1181

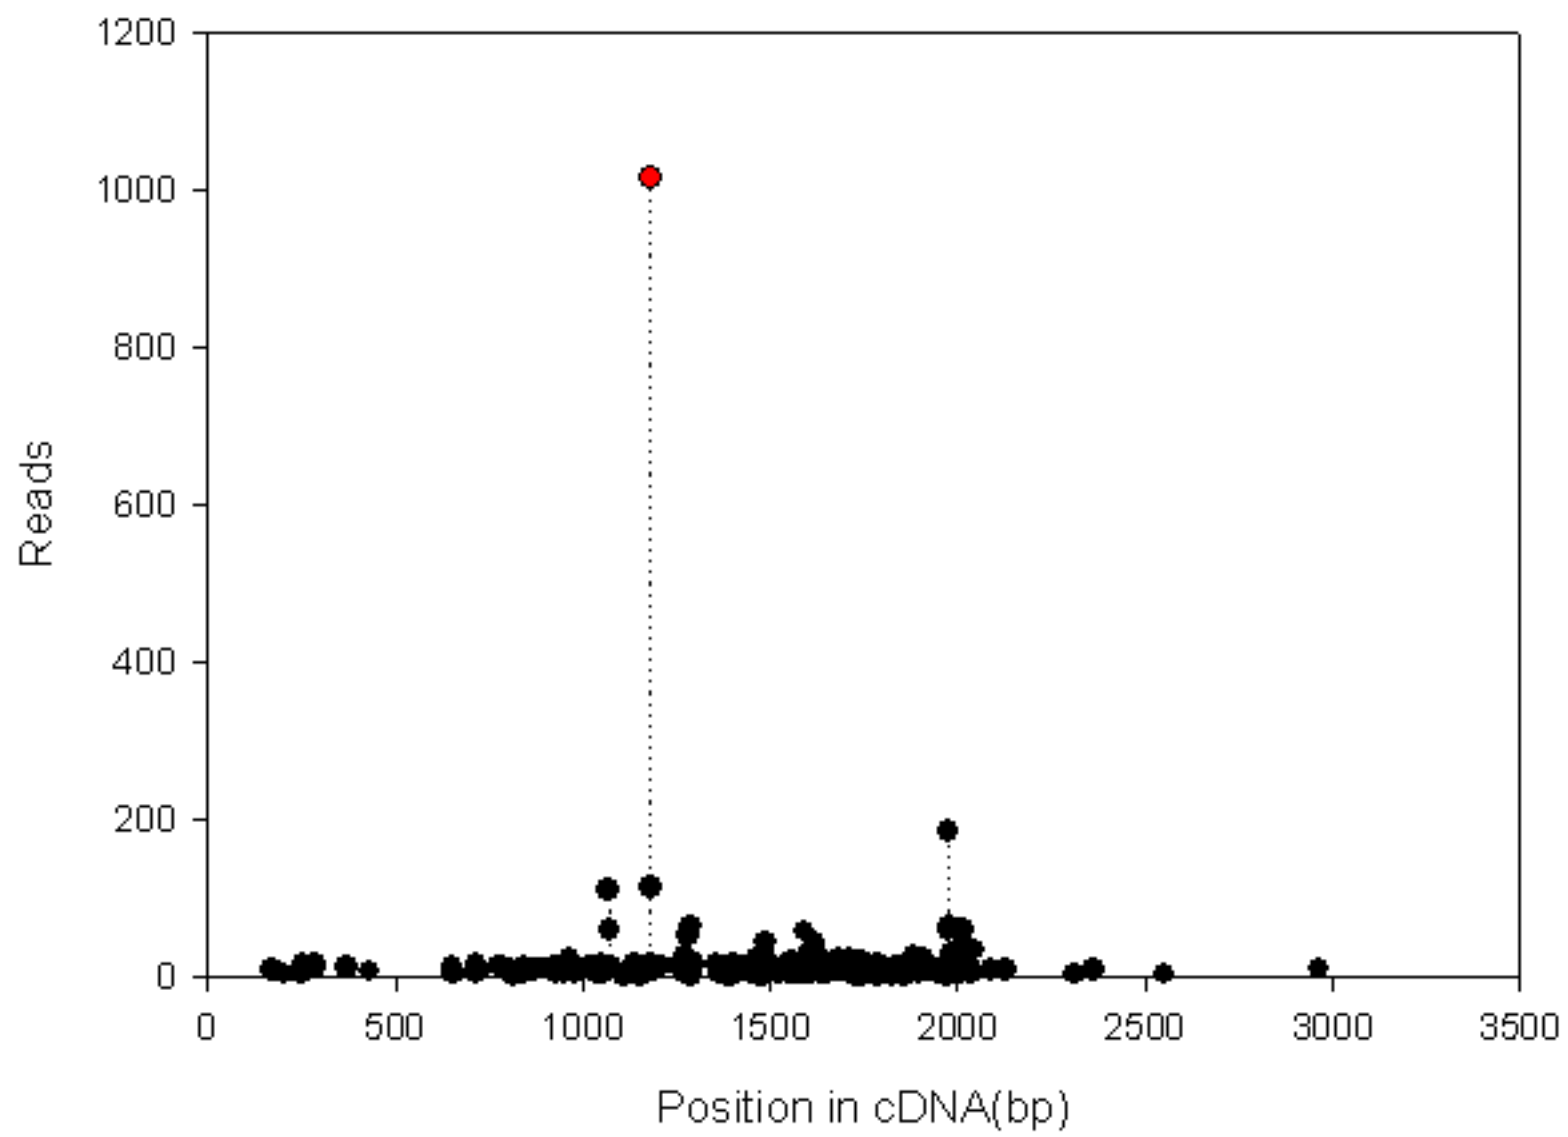

```

5' CCCGUUCAAGAAAGCCUGUGGAAUUA 3'          Cs5g01380.1
   :::::::::::::::::::: :::::::
3' ---CAAGUUCUUUCGG-CACCUU--- 5'          Csi-miR396d.3
  
```

Csi-miR396d.3, target=Cs5g09850.1 gene=Cs5g09850  
 Category:3  
 Score=3  
 Cleavage Site=767



|                                  |               |
|----------------------------------|---------------|
| 5' UGCGUUCAAGAAAGCUUGUGGAAGCU 3' | Cs5g09850.1   |
| .:.:.:.:.:.:.:.:.:.:.:.:.:.:.:.: |               |
| 3' ---CAAGUUCUUUCG-GCACCUU--- 5' | Csi-miR396d.3 |

Csi-miR396d.3, target=Cs7g15220.1 gene=Cs7g15220  
 Category:1  
 Score=2  
 Cleavage Site=377



```

5' ACCGUUCAAGAAAGCCUGUGGAAUCA 3'      Cs7g15220.1
   ::::::::::::::: :::::
3' ---CAAGUUCUUUCGG-CACCUU--- 5'      Csi-miR396d.3
  
```

Csi-miR396d.3, target=Cs8g17370.1 gene=Cs8g17370  
 Category:3  
 Score=3.5  
 Cleavage Site=140



```

5' AGGAUUACAAGAAGGCCGUGGAGAAA 3'      Cs8g17370.1
   : : : : : : : : : : : : : : : :
3' ----CAAGUUCUUUCGGCACCUC---- 5'      Csi-miR396d.3
  
```

Csi-miR396d.3, target=Orange1.1t00172.1 gene=Orange1.1t00172  
 Category:1  
 Score=2  
 Cleavage Site=656

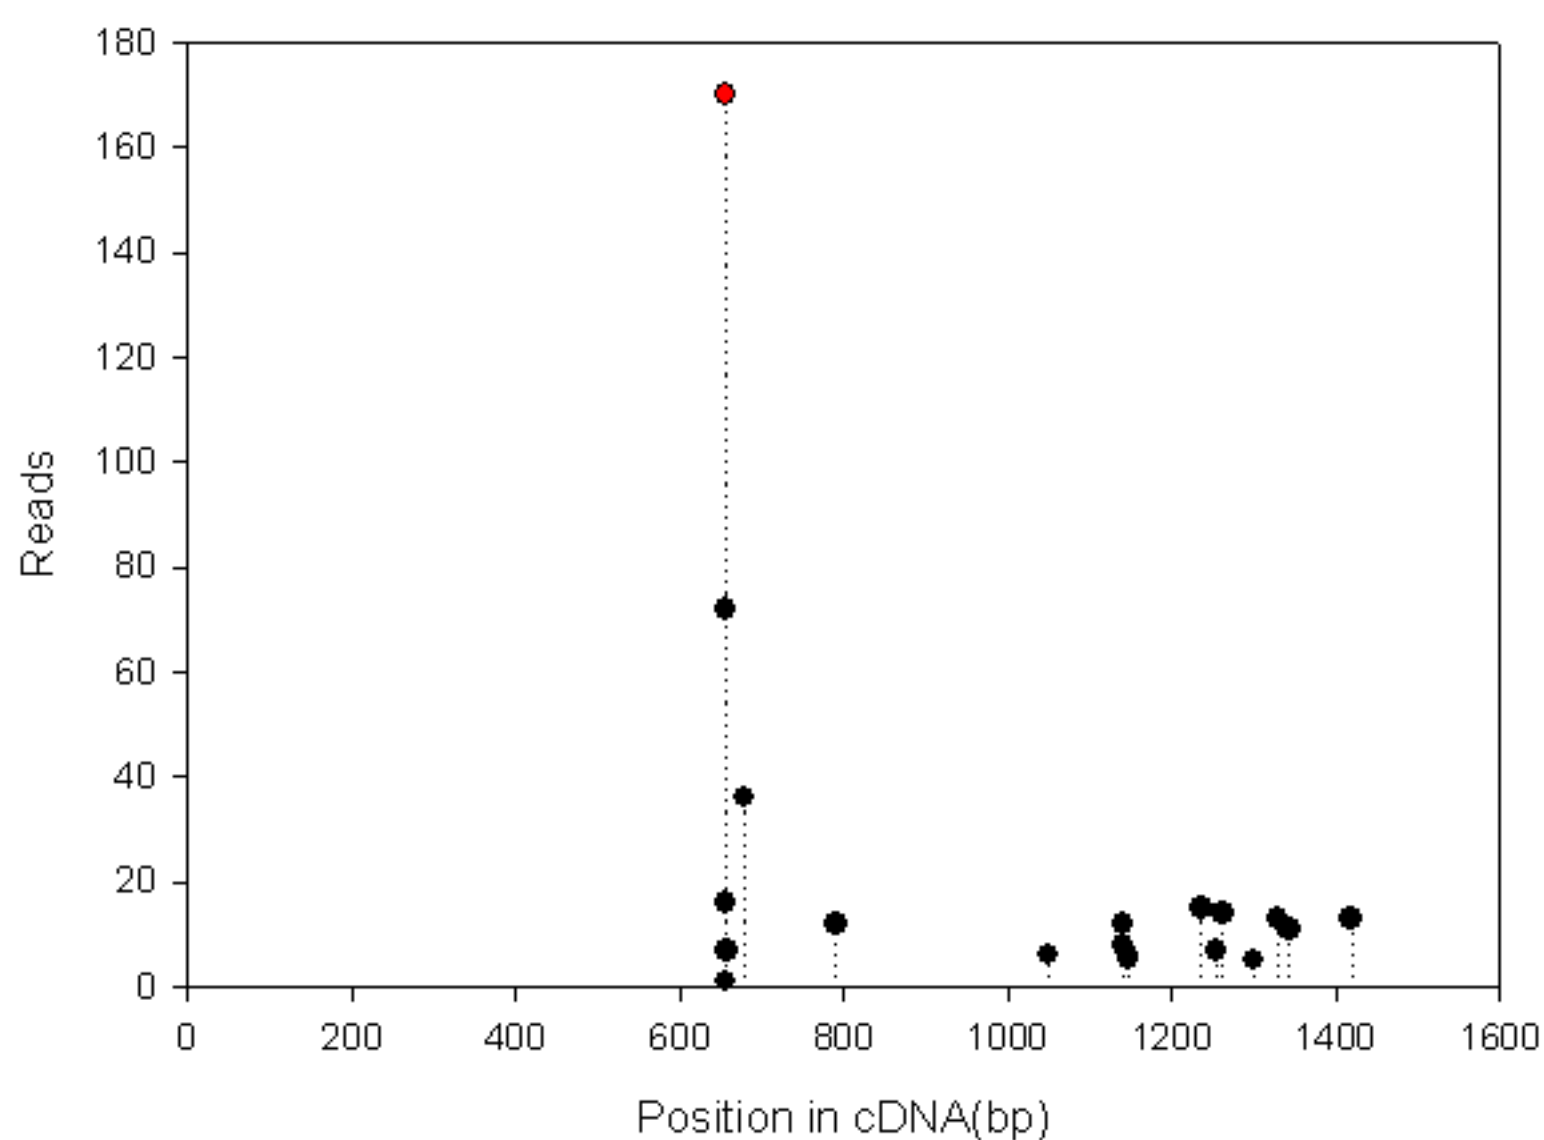

```

5' ACCGUUCAAGAAAGCCUGUGGAACUU 3'      Orange1.1t00172.1
   :::::::::::::::::::: :::::
3' ---CAAGUUCUUUCGG-CACCUU--- 5'      Csi-miR396d.3
  
```

Csi-miR396d.3, target=Orange1.1t02555.1 gene=Orange1.1t02555  
 Category:1  
 Score=2  
 Cleavage Site=920

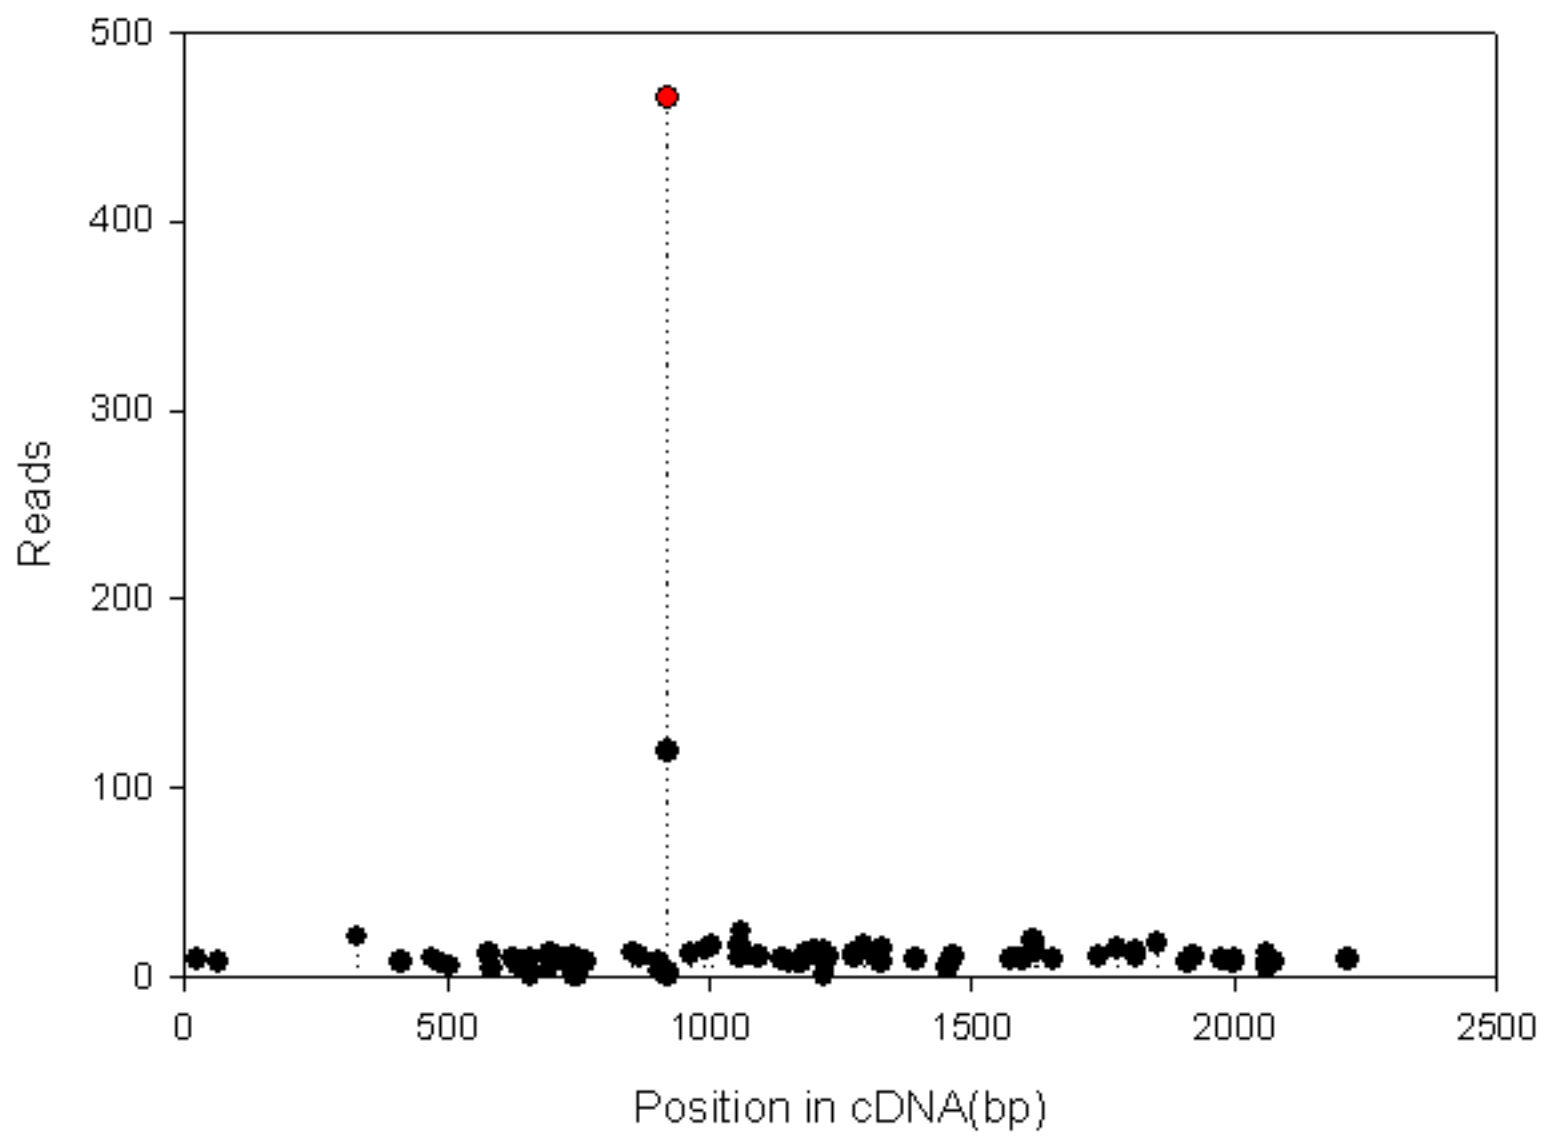

```

5' CACGUUCAAGAAAGCCUGUGGAACUU 3'      Orange1.1t02555.1
   ::::::::::::::: :::::::
3' ---CAAGUUCUUUCGG-CACCUU--- 5'      Csi-miR396d.3
  
```



Csi-miR396d.3, target=Orange1.1t03122.1 gene=Orange1.1t03122  
 Category:1  
 Score=2  
 Cleavage Site=583



5' ACCGUUCAAGAAAGCCUGUGGAAUCA 3'  
 :::::::::::::::::::: :::::::  
 3' ---CAAGUUCUUUCGG-CACCUU--- 5'

Orange1.1t03122.1  
 Csi-miR396d.3

Csi-miR396d.4, target=Cs1g15720.1 gene=Cs1g15720  
 Category:3  
 Score=4  
 Cleavage Site=1610

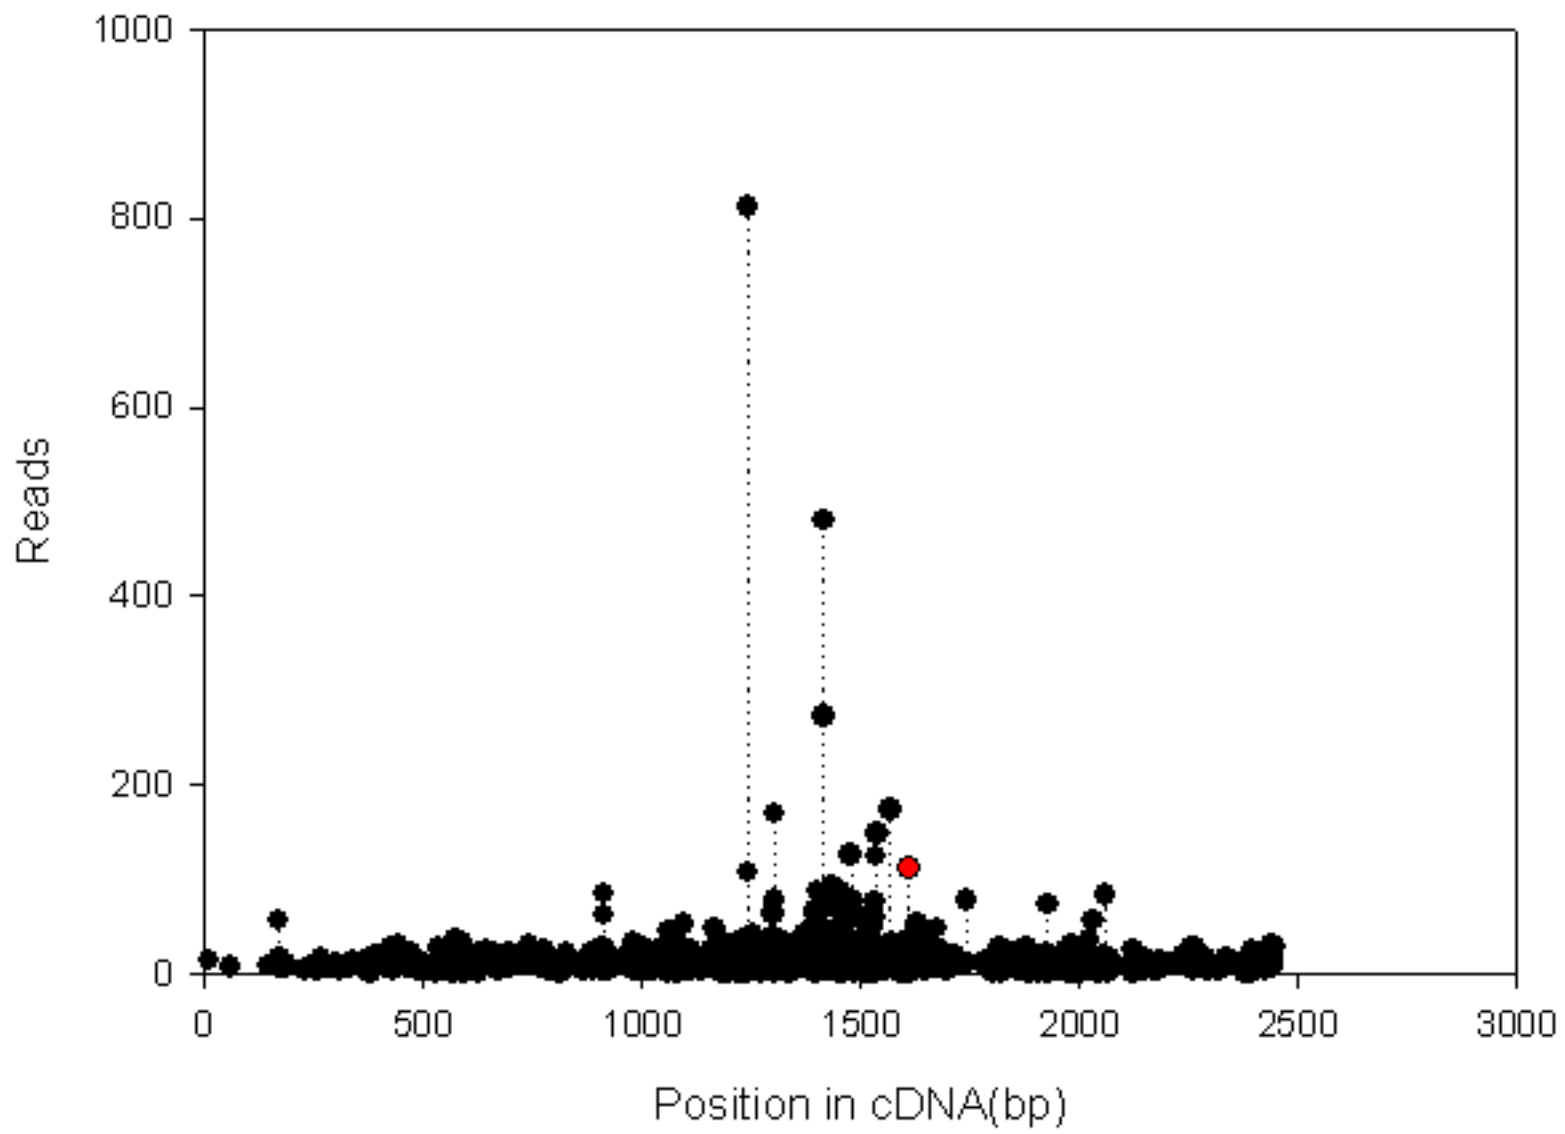

|    |                               |    |               |
|----|-------------------------------|----|---------------|
| 5' | CAACAUUCAA-AAAGCCGUGGGCUCA    | 3' | Cs1g15720.1   |
|    | : : : : : : : : : : : : : : . |    |               |
| 3' | -----AAGUUCUUUCGGCACCUU---    | 5' | Csi-miR396d.4 |

Csi-miR396d.4, target=Cs1g21350.1 gene=Cs1g21350  
 Category:1  
 Score=2  
 Cleavage Site=1164



5' ACCGUUCAAGAAAGCCUGUGGAAGGC 3'  
 :::::::::::::: :::::  
 3' ----AAGUUCUUUCGG-CACCUU---- 5'

Cs1g21350.1  
 Csi-miR396d.4

Csi-miR396d.4, target=Cs1g22520.1 gene=Cs1g22520  
 Category:1  
 Score=4  
 Cleavage Site=226



5' GAAGUUCAAGAAAUCUGUGGGAAGAA 3'  
 ::::::::::: :.:::::  
 3' ----AAGUUCUUUCGGCACCUU---- 5'

Cs1g22520.1

Csi-miR396d.4

Csi-miR396d.4, target=Cs2g21180.1 gene=Cs2g21180  
 Category:3  
 Score=4.5  
 Cleavage Site=600

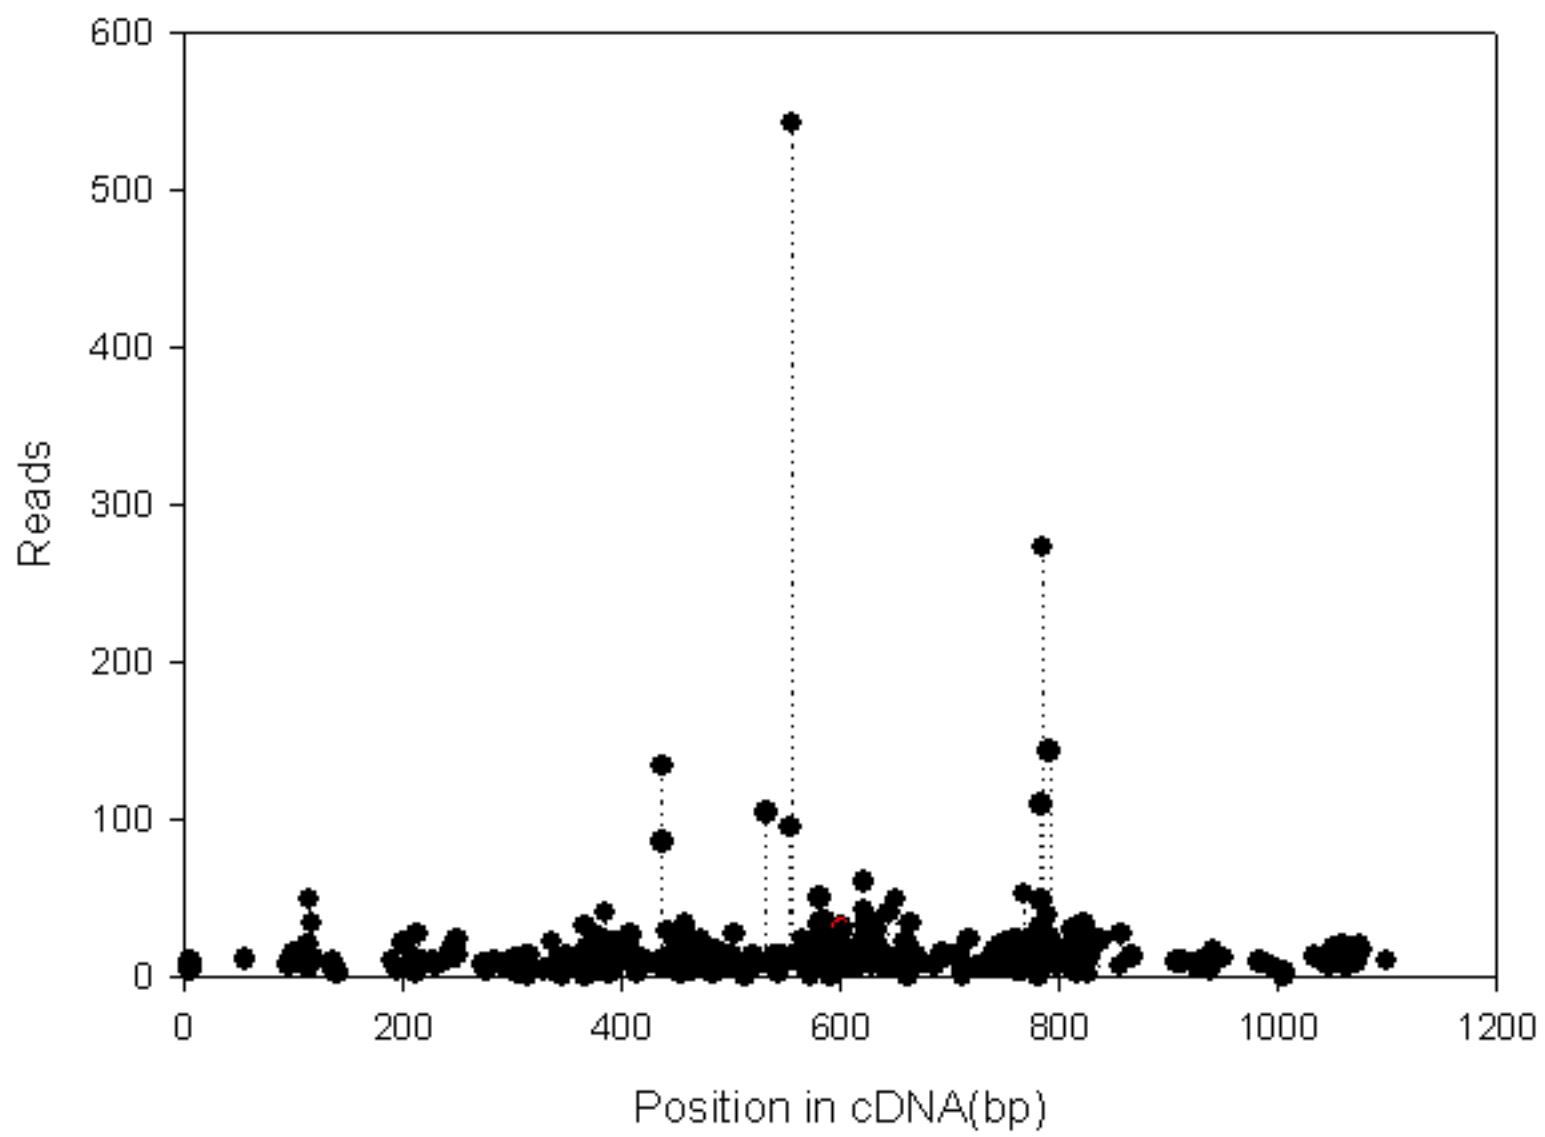

|    |                            |    |               |
|----|----------------------------|----|---------------|
| 5' | UCGAUUGCUCAGGAAGGCCAUGGAAG | 3' | Cs2g21180.1   |
|    | .....                      |    |               |
| 3' | -----AAGUUCUUUCGGCACCUU-   | 5' | Csi-miR396d.4 |

Csi-miR396d.4, target=Cs3g23180.1 gene=Cs3g23180  
 Category:1  
 Score=4  
 Cleavage Site=625



```

5' AAAGAUCAAGGAAGCUGUGGGAGUUG 3'      Cs3g23180.1
   : : : : : : : : : : : : : : : :
3' ----AAGUUCUUUCGGCACCUU---- 5'      Csi-miR396d.4
  
```

Csi-miR396d.4, target=Cs4g05000.1 gene=Cs4g05000  
 Category:3  
 Score=5  
 Cleavage Site=1249



```

5' ACCCUUGAAGAAAGCUGUGGAUUAUAG 3'          Cs4g05000.1
   :: ::::::::::::::::::::
3' ----AAGUUCUUUCGGCACCUU---- 5'          Csi-miR396d.4
  
```

Csi-miR396d.4, target=Cs4g10880.1 gene=Cs4g10880  
 Category:3  
 Score=5  
 Cleavage Site=803

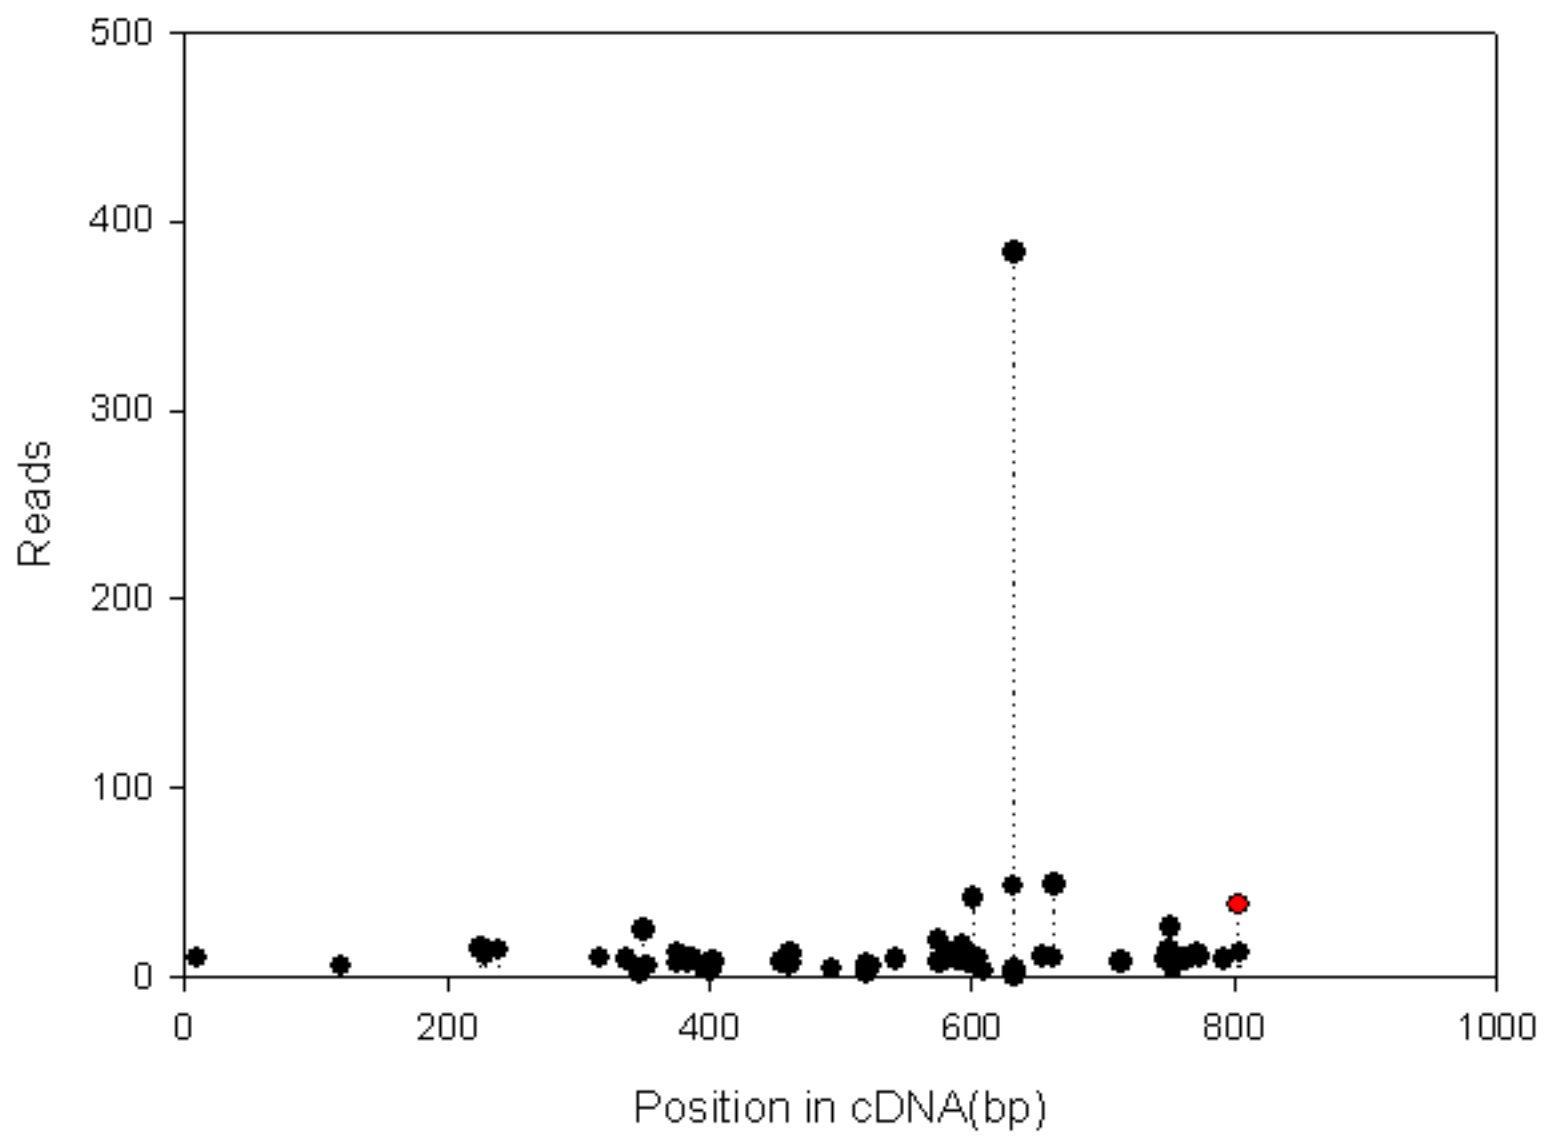

|                                    |               |
|------------------------------------|---------------|
| 5' UUUUGAGGGAGCC-UGGAACUGAUUUC 3'  | Cs4g10880.1   |
| :  :  :  :  :  :  :  :  :  :  :  : |               |
| 3' -AAGUUCUUUCGGCACCUU----- 5'     | Csi-miR396d.4 |



Csi-miR396d.4, target=Cs4g12200.1 gene=Cs4g12200  
 Category:3  
 Score=4  
 Cleavage Site=228



```

5' GGUUCCUGAAAGCCG-GGAAUAUGCU 3'      Cs4g12200.1
   :::  :::::::::::  ::::
3' --AAGUUCUUUCGGCACCUU----- 5'      Csi-miR396d.4
  
```

Csi-miR396d.4, target=Cs5g01380.1 gene=Cs5g01380  
 Category:1  
 Score=2  
 Cleavage Site=1181



|    |                             |    |               |
|----|-----------------------------|----|---------------|
| 5' | CCCGUUCAAGAAAGCCUGUGGAAUUA  | 3' | Cs5g01380.1   |
|    | .....                       |    |               |
| 3' | ----AAGUUCUUUCGG-CACCUU---- | 5' | Csi-miR396d.4 |

Csi-miR396d.4, target=Cs5g01840.1 gene=Cs5g01840  
 Category:3  
 Score=5  
 Cleavage Site=1251

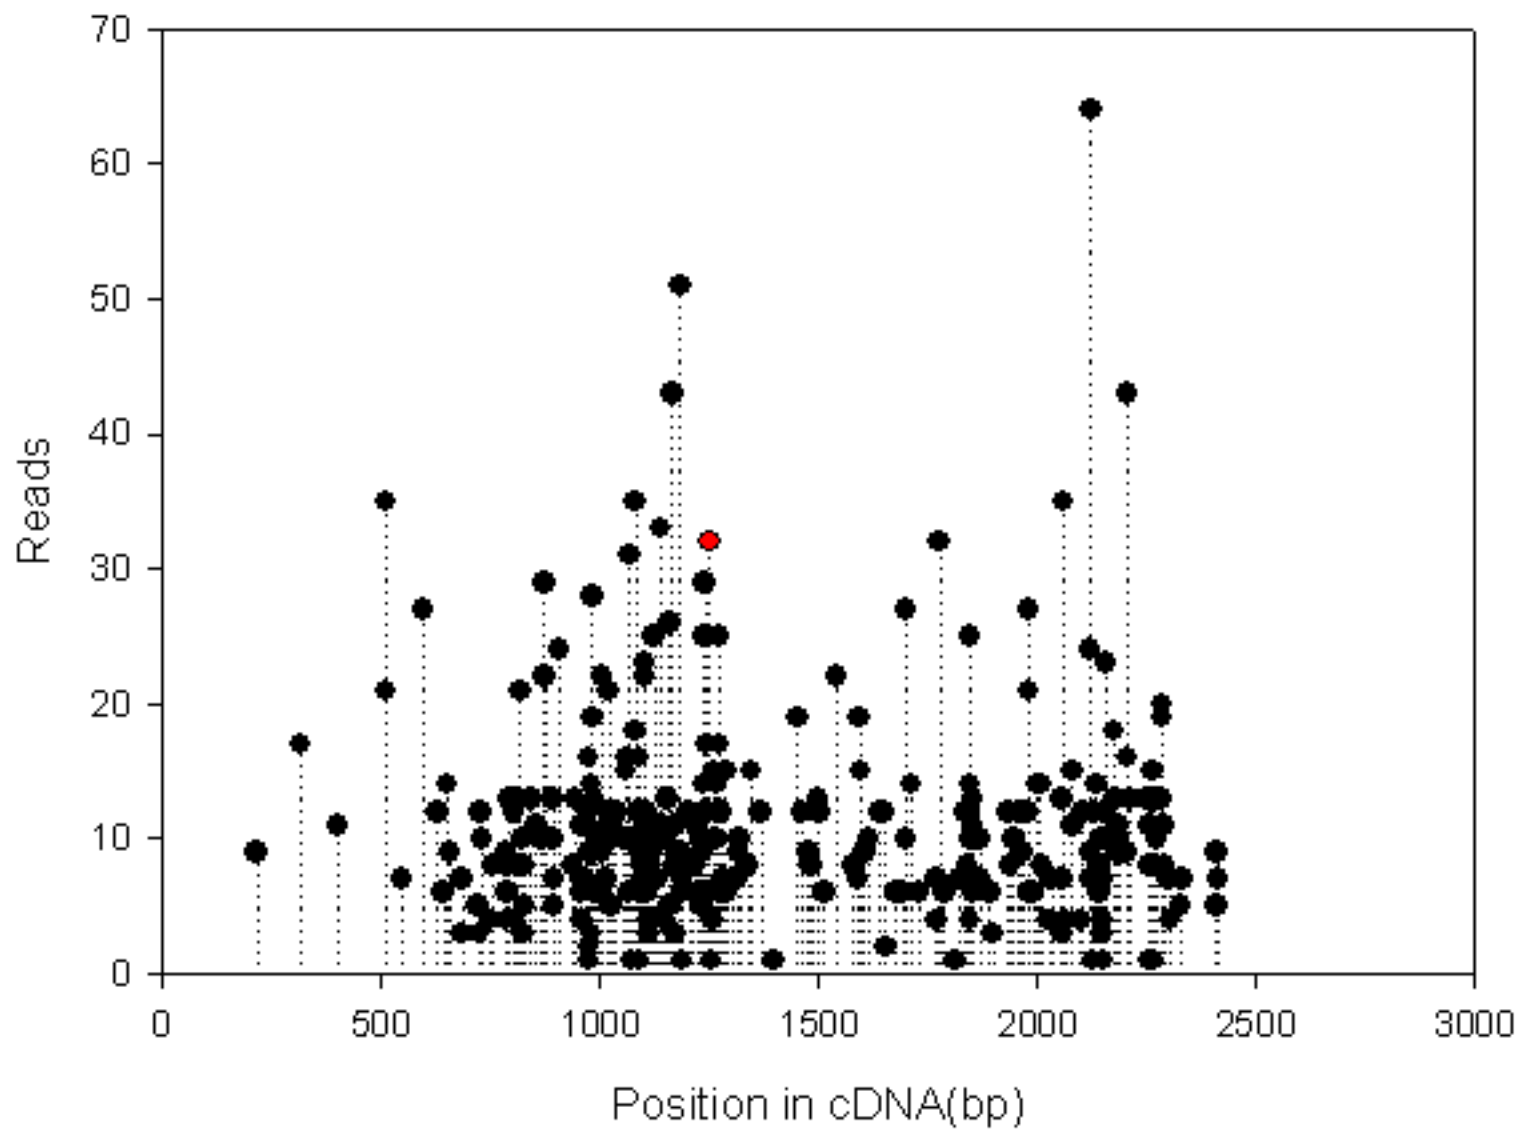

```

5' CCUGUGAAGAAGGCCAUGGAAGAUGC 3'      Cs5g01840.1
   : : : : : : : : : : : : : : :
3' ---AAGUUCUUUCGGCACCUU----- 5'      Csi-miR396d.4
  
```

Csi-miR396d.4, target=Cs5g06510.1 gene=Cs5g06510  
 Category:3  
 Score=5  
 Cleavage Site=1185



```

5' UAAUCAAGAAAGCUGAGGACUUAGCU 3'      Cs5g06510.1
   : : : : : : : : : : : : : : :
3' --AAGUUCUUUCGGCACCUU----- 5'      Csi-miR396d.4

```

Csi-miR396d.4, target=Cs5g09850.1 gene=Cs5g09850  
 Category:3  
 Score=3  
 Cleavage Site=767

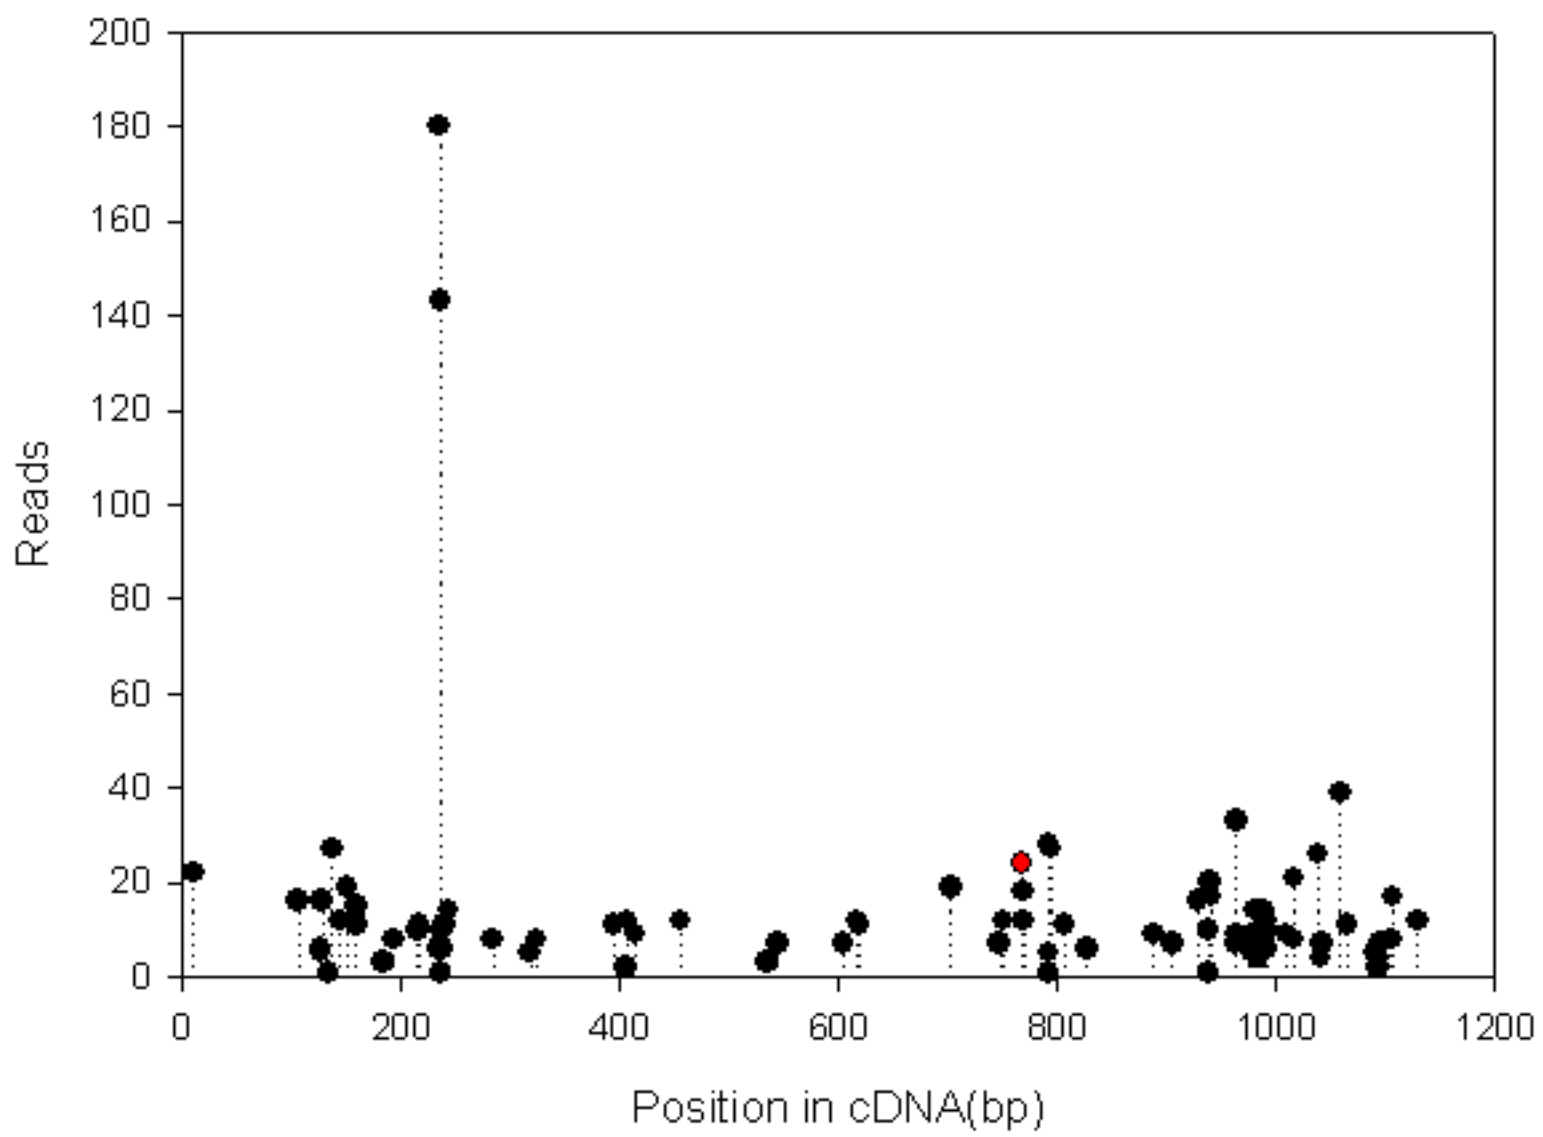

```

5' UGCGUUCAAGAAAGCUUGUGGAAGCU 3'      Cs5g09850.1
      ::::::::::: .:::::
3' ----AAGUUCUUUCG-GCACCUU---- 5'      Csi-miR396d.4
  
```

Csi-miR396d.4, target=Cs6g17090.1 gene=Cs6g17090  
 Category:3  
 Score=4.5  
 Cleavage Site=1398

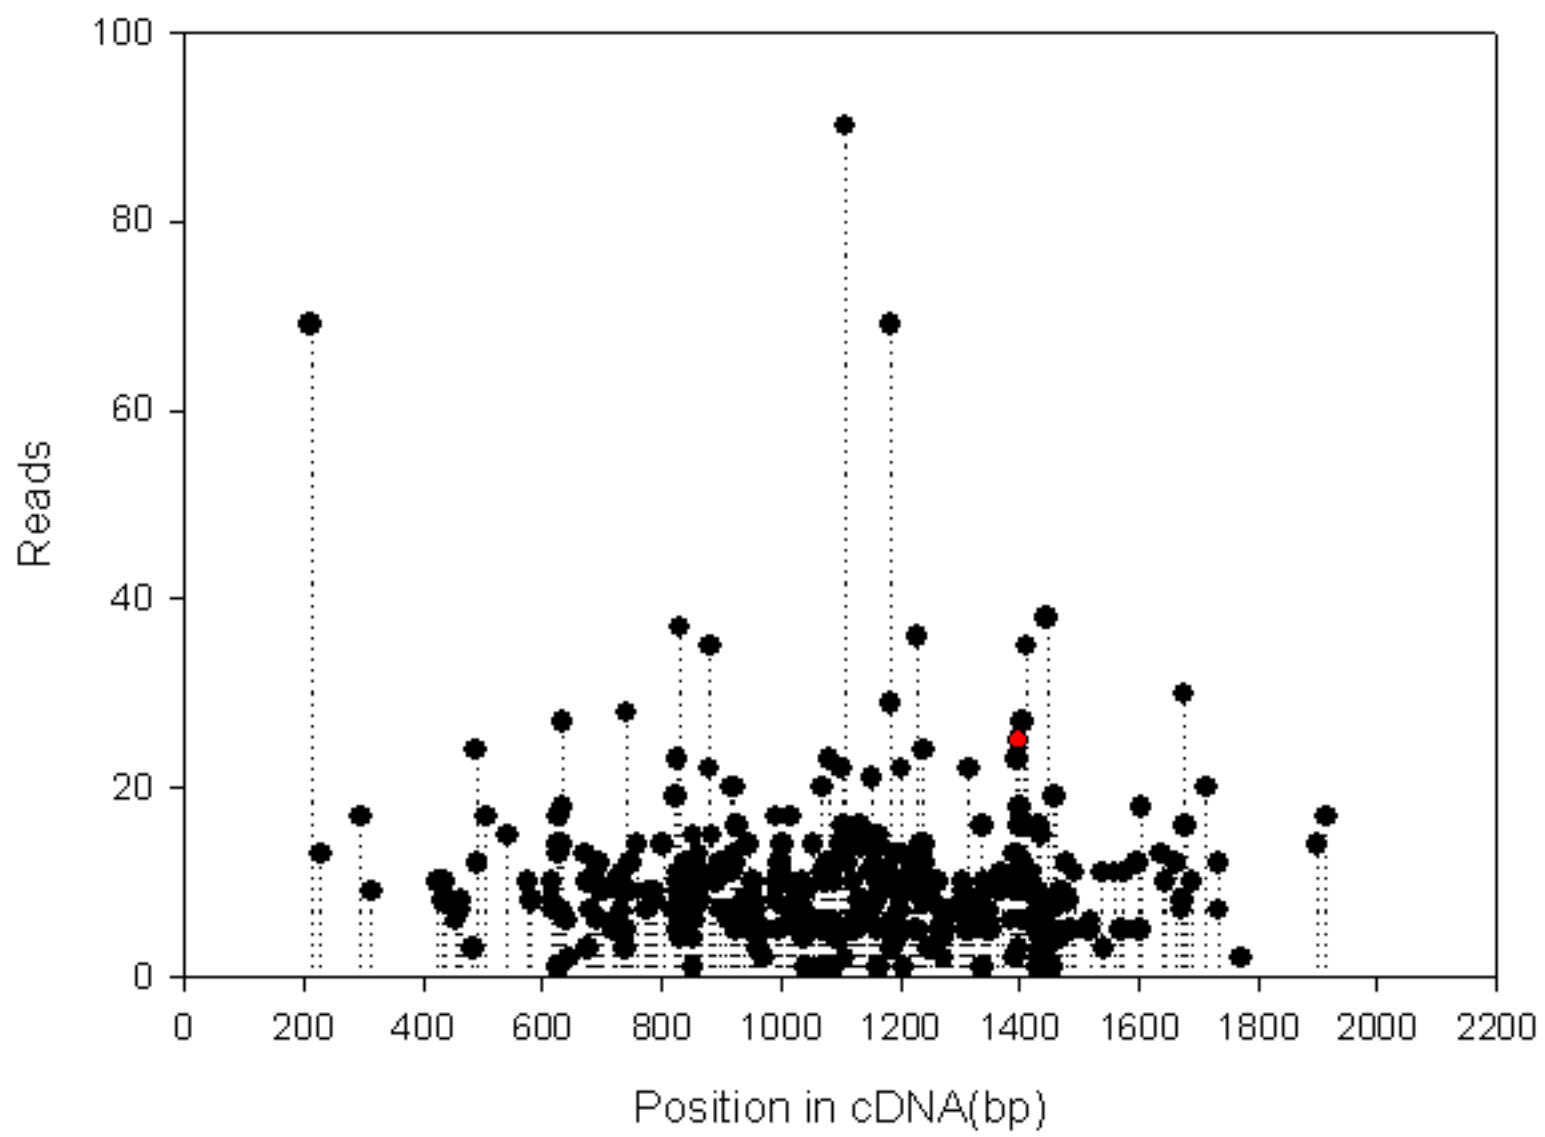

5' AAUUUGAGAGAGGCGUGGAGAUUCUG 3'

Cs6g17090.1

.....

3' --AAGUUCUUUCGGCACCUU----- 5'

Csi-miR396d.4

Csi-miR396d.4, target=Cs6g19380.1 gene=Cs6g19380  
Category:2  
Score=5  
Cleavage Site=1152

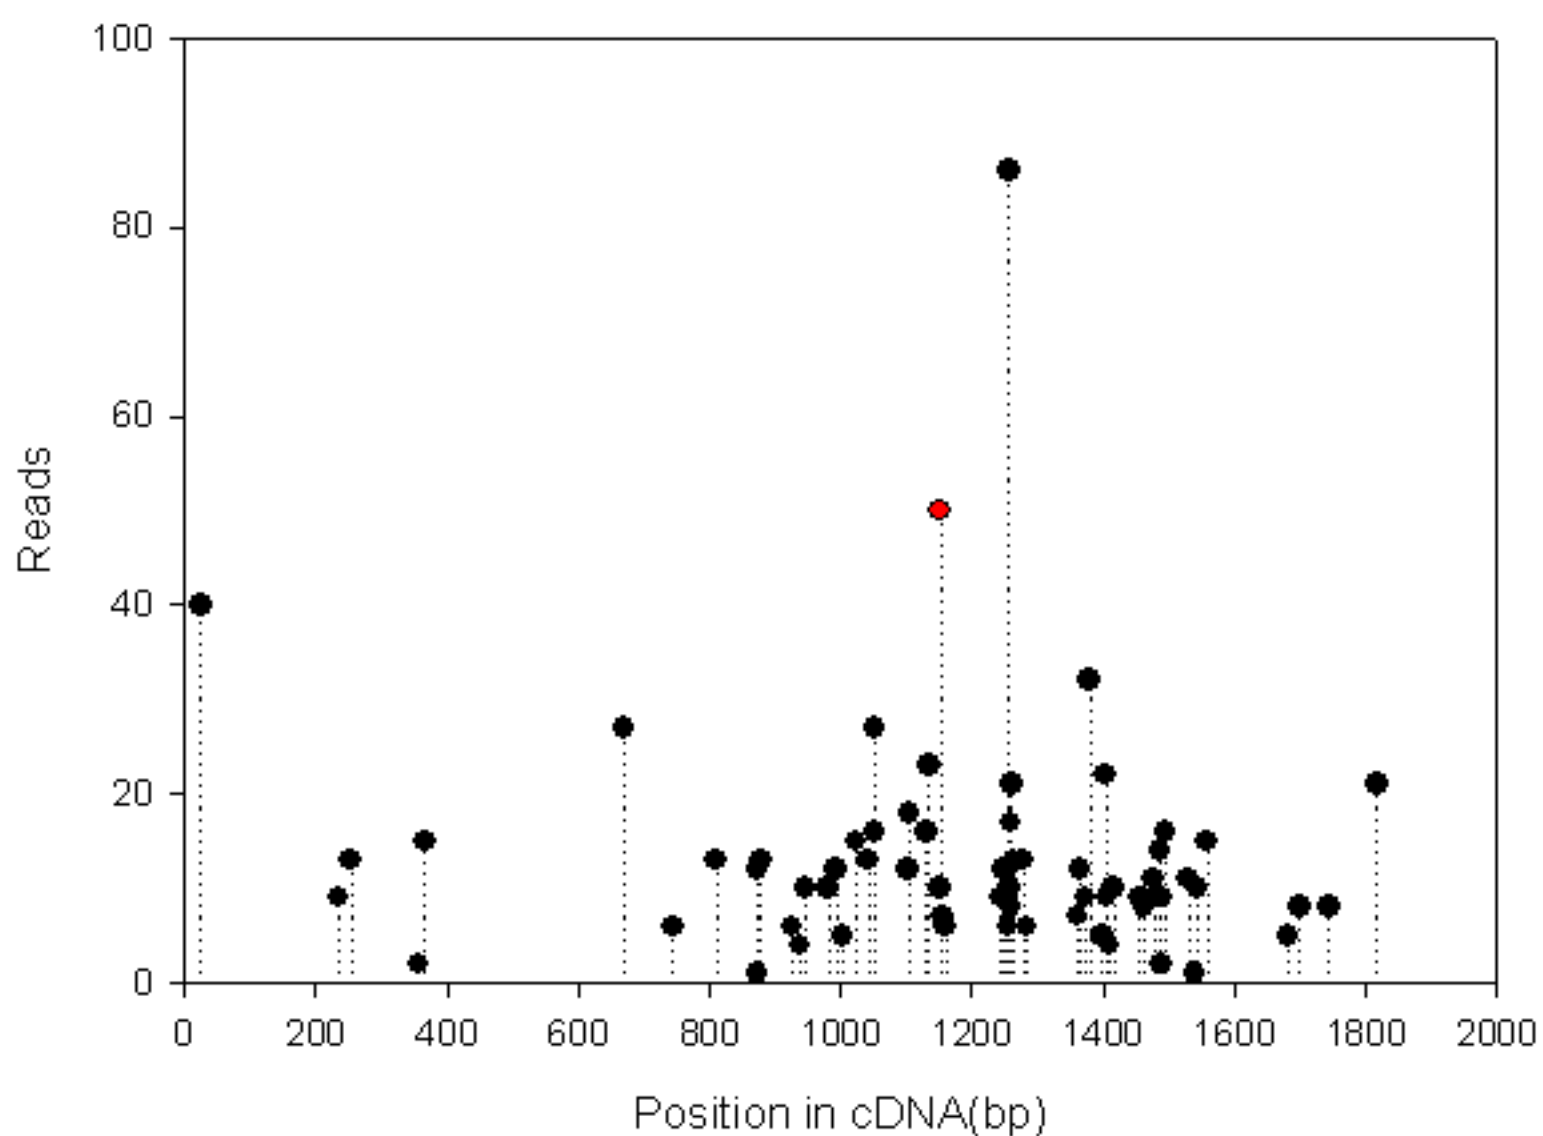

```
5' CUUUUACUUUUAGAGAAGCUGUGGAA 3'
    . . . . . : . . . . . : . . . . . :
3' -----AAGUUCUUUCGGCACCUU 5'
```

Cs6g19380.1

Csi-miR396d.4

Csi-miR396d.4, target=Cs7g15220.1 gene=Cs7g15220  
 Category:1  
 Score=2  
 Cleavage Site=377

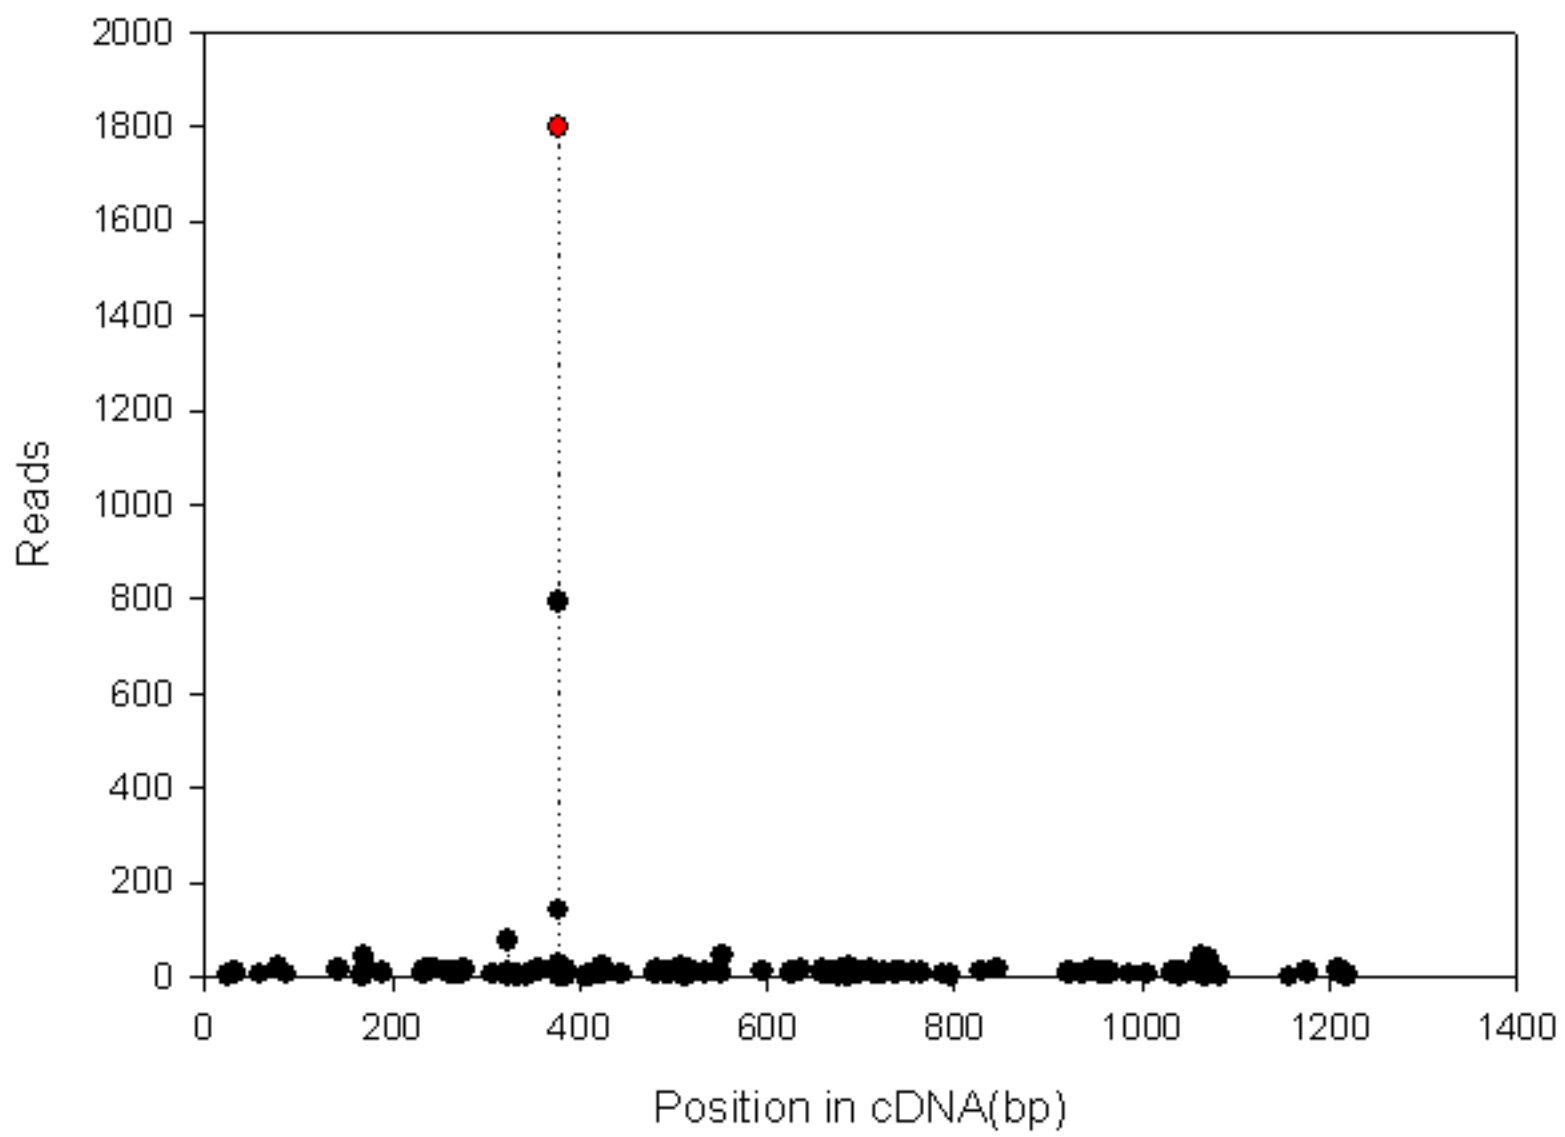

```

5' ACCGUUCAAGAAAGCCUGUGGAAUCA 3'      Cs7g15220.1
   ::::::::::::::: :::::::
3' ----AAGUUCUUUCGG-CACCUU---- 5'      Csi-miR396d.4
  
```



Csi-miR396d.4, target=Cs7g27670.1 gene=Cs7g27670  
 Category:1  
 Score=5  
 Cleavage Site=653



```

5' UCAUCCAAGAAGGCUAUGGAAUGGAC 3'      Cs7g27670.1
   : : : : : : : : : : : : : : : :
3' ---AAGUUCUUUCGGCACCUU----- 5'      Csi-miR396d.4
  
```

Csi-miR396d.4, target=Cs7g27680.1 gene=Cs7g27680  
 Category:1  
 Score=5  
 Cleavage Site=713

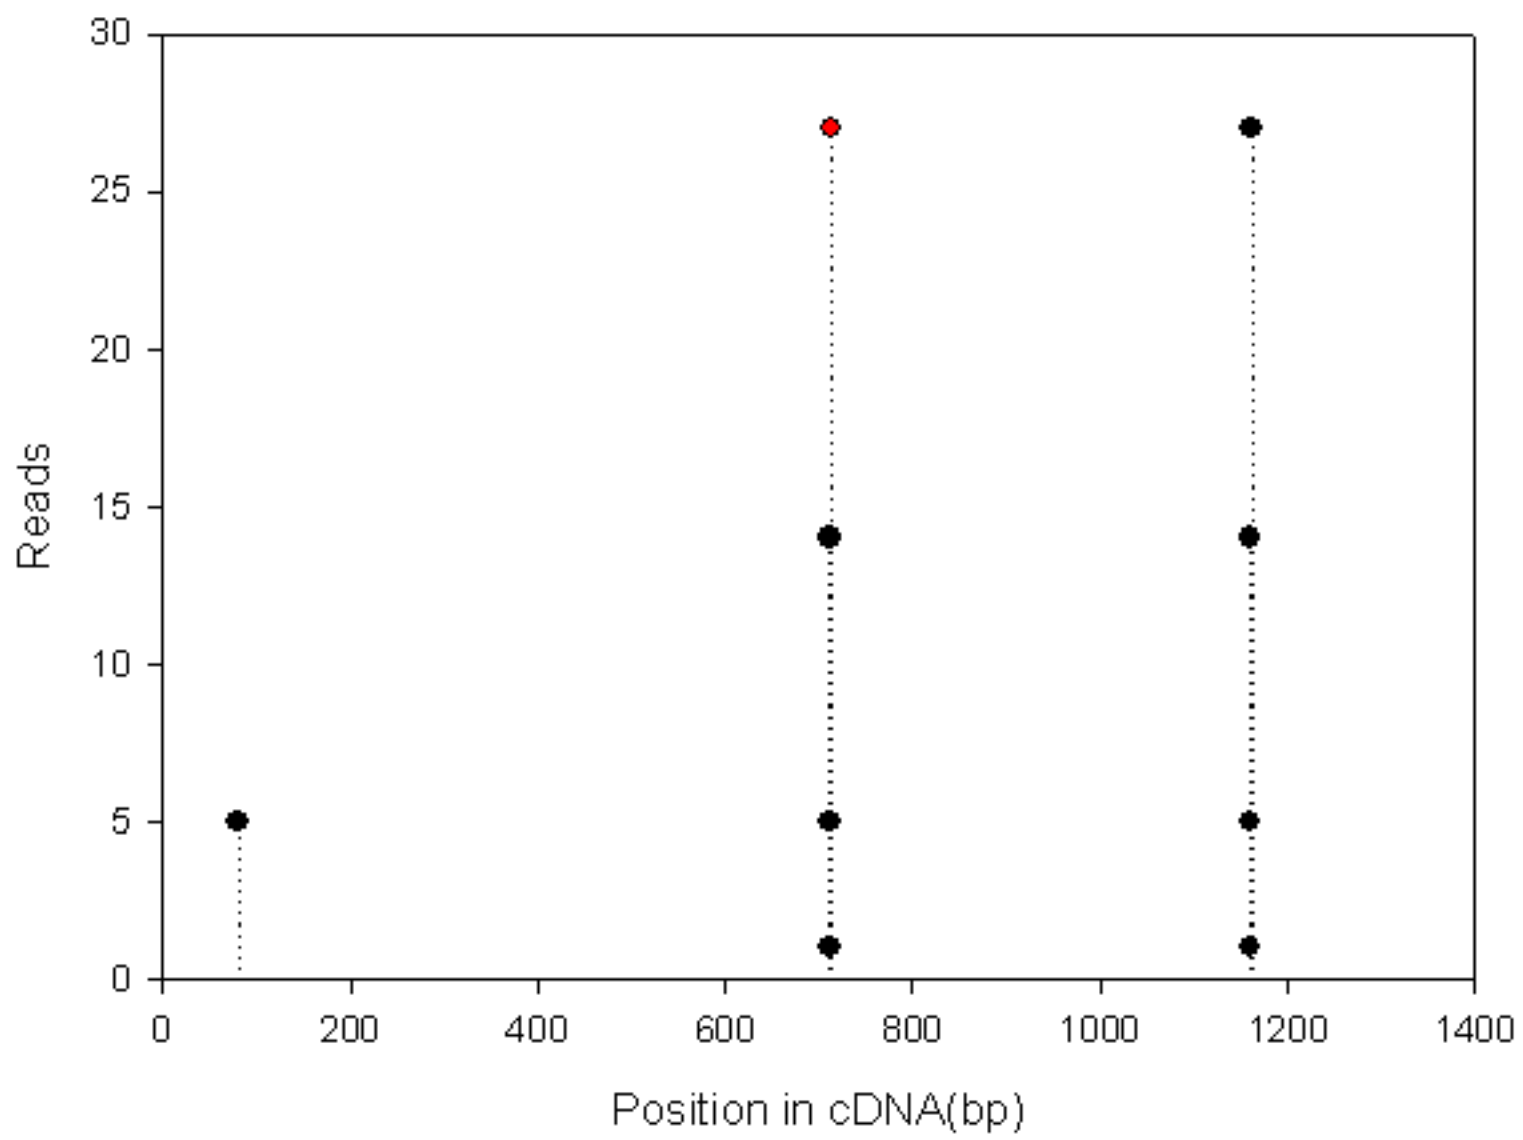

```

5' UCAUCCAAGAAGGCUAUGGAAUGGAC 3'      Cs7g27680.1
   : : : : : : : : : : : : : : : :
3' ---AAGUUCUUUCGGCACCUU----- 5'      Csi-miR396d.4
  
```

Csi-miR396d.4, target=Cs8g03230.1 gene=Cs8g03230  
 Category:3  
 Score=4.5  
 Cleavage Site=666

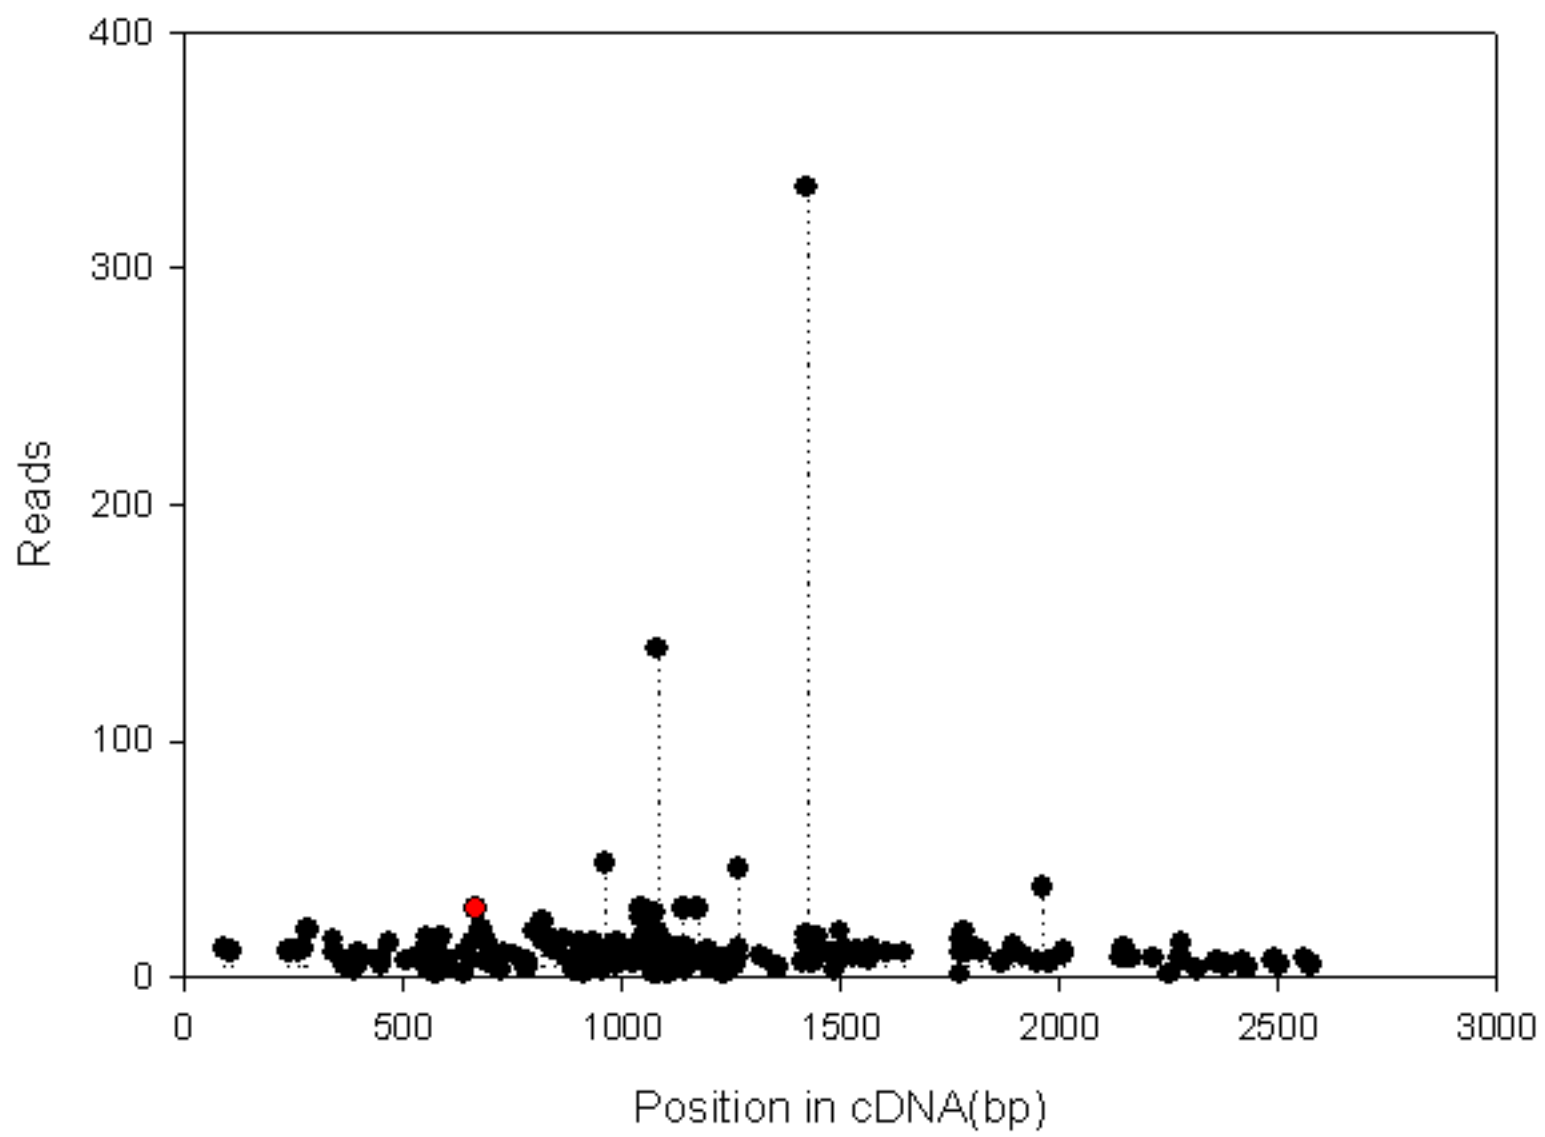

|    |                                 |    |               |
|----|---------------------------------|----|---------------|
| 5' | GCCGGCGUCCGAGGAAGCC-UGGAAU      | 3' | Cs8g03230.1   |
|    | : : : : : : : : : : : : : : : : |    |               |
| 3' | -----AAGUUCUUUCGGCACCUU-        | 5' | Csi-miR396d.4 |

Csi-miR396d.4, target=Cs8g17370.1 gene=Cs8g17370  
 Category:3  
 Score=2.5  
 Cleavage Site=140

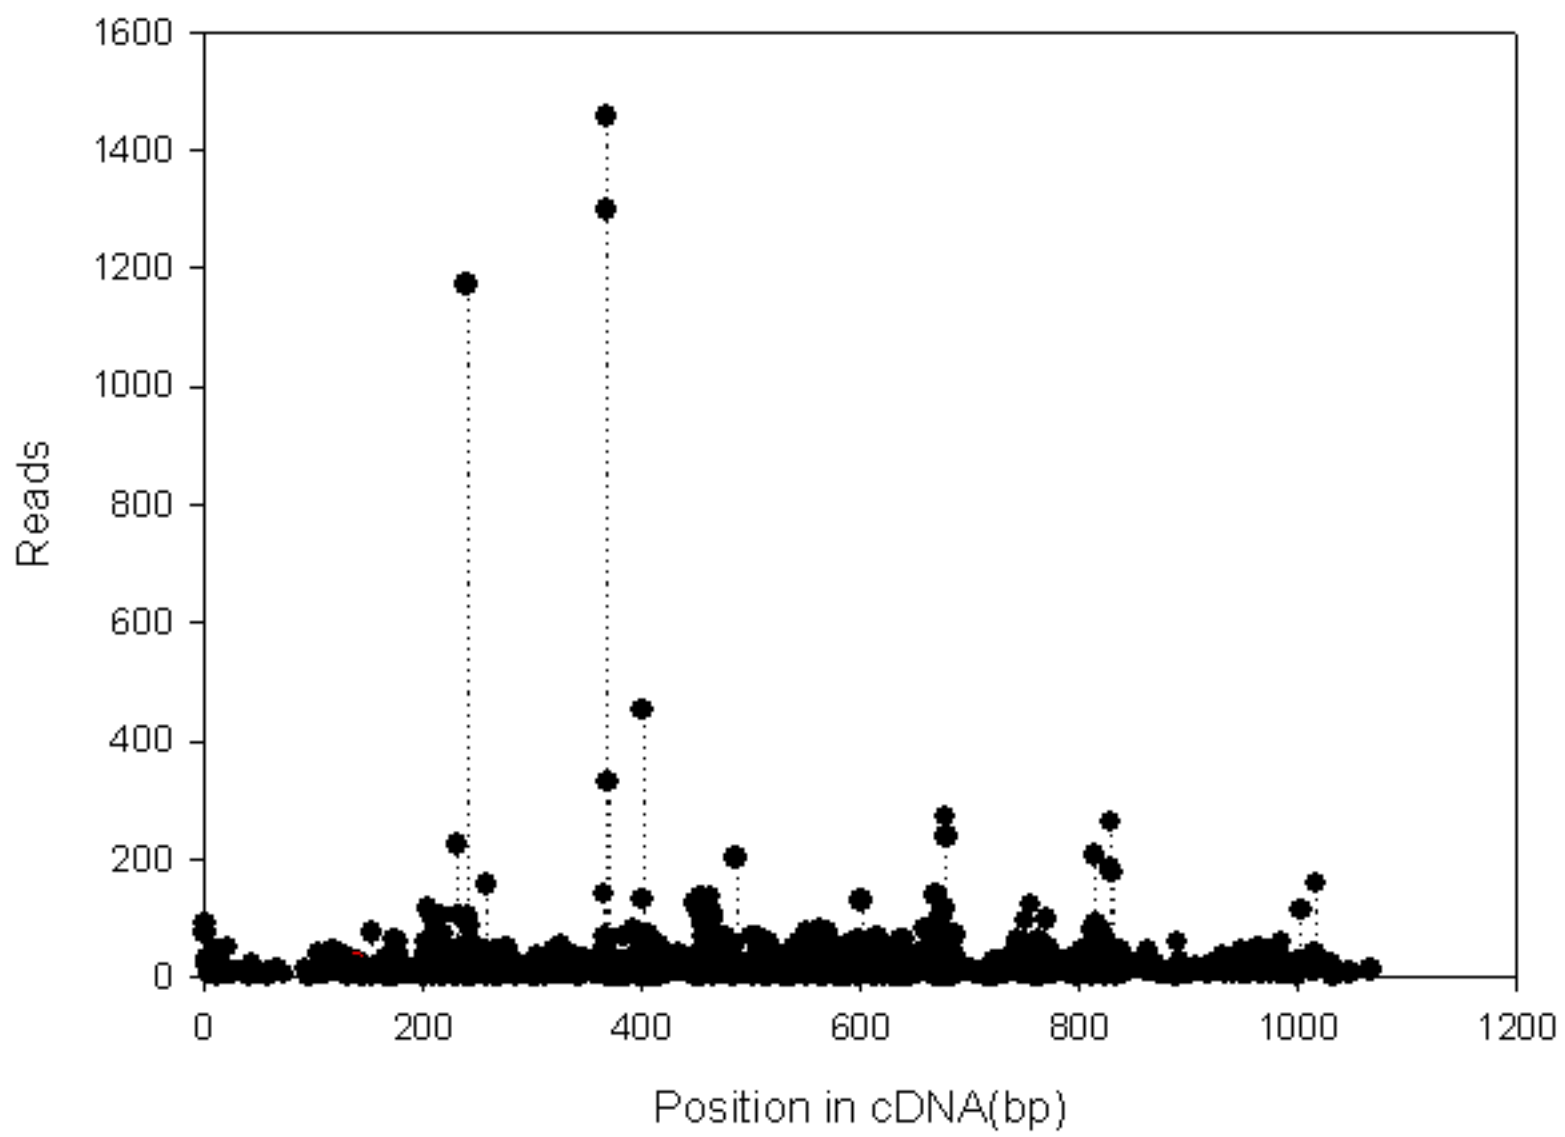

```

5' AGGAUUACAAGAAGGCCGUGGAGAAA 3'      Cs8g17370.1
   : : : : : : : : : : : : : : :
3' -----AAGUUCUUUCGGCACCUU---- 5'    Csi-miR396d.4
  
```

Csi-miR396d.4, target=Orange1.1t00172.1 gene=Orange1.1t00172  
 Category:1  
 Score=2  
 Cleavage Site=656



5' ACCGUUCAAGAAAGCCUGUGGAACUU 3'  
 :::::::::::::: :::::  
 3' ----AAGUUCUUUCGG-CACCUU--- 5'

Orange1.1t00172.1  
 Csi-miR396d.4

Csi-miR396d.4, target=Orange1.1t02555.1 gene=Orange1.1t02555  
 Category:1  
 Score=2  
 Cleavage Site=920



5' CACGUUCAAGAAAGCCUGUGGAACUU 3'  
 :::::::::::::: :::::  
 3' ----AAGUUCUUUCGG-CACCUU---- 5'

Orange1.1t02555.1  
 Csi-miR396d.4

Csi-miR396d.4, target=Orange1.1t03122.1 gene=Orange1.1t03122  
 Category:1  
 Score=2  
 Cleavage Site=583

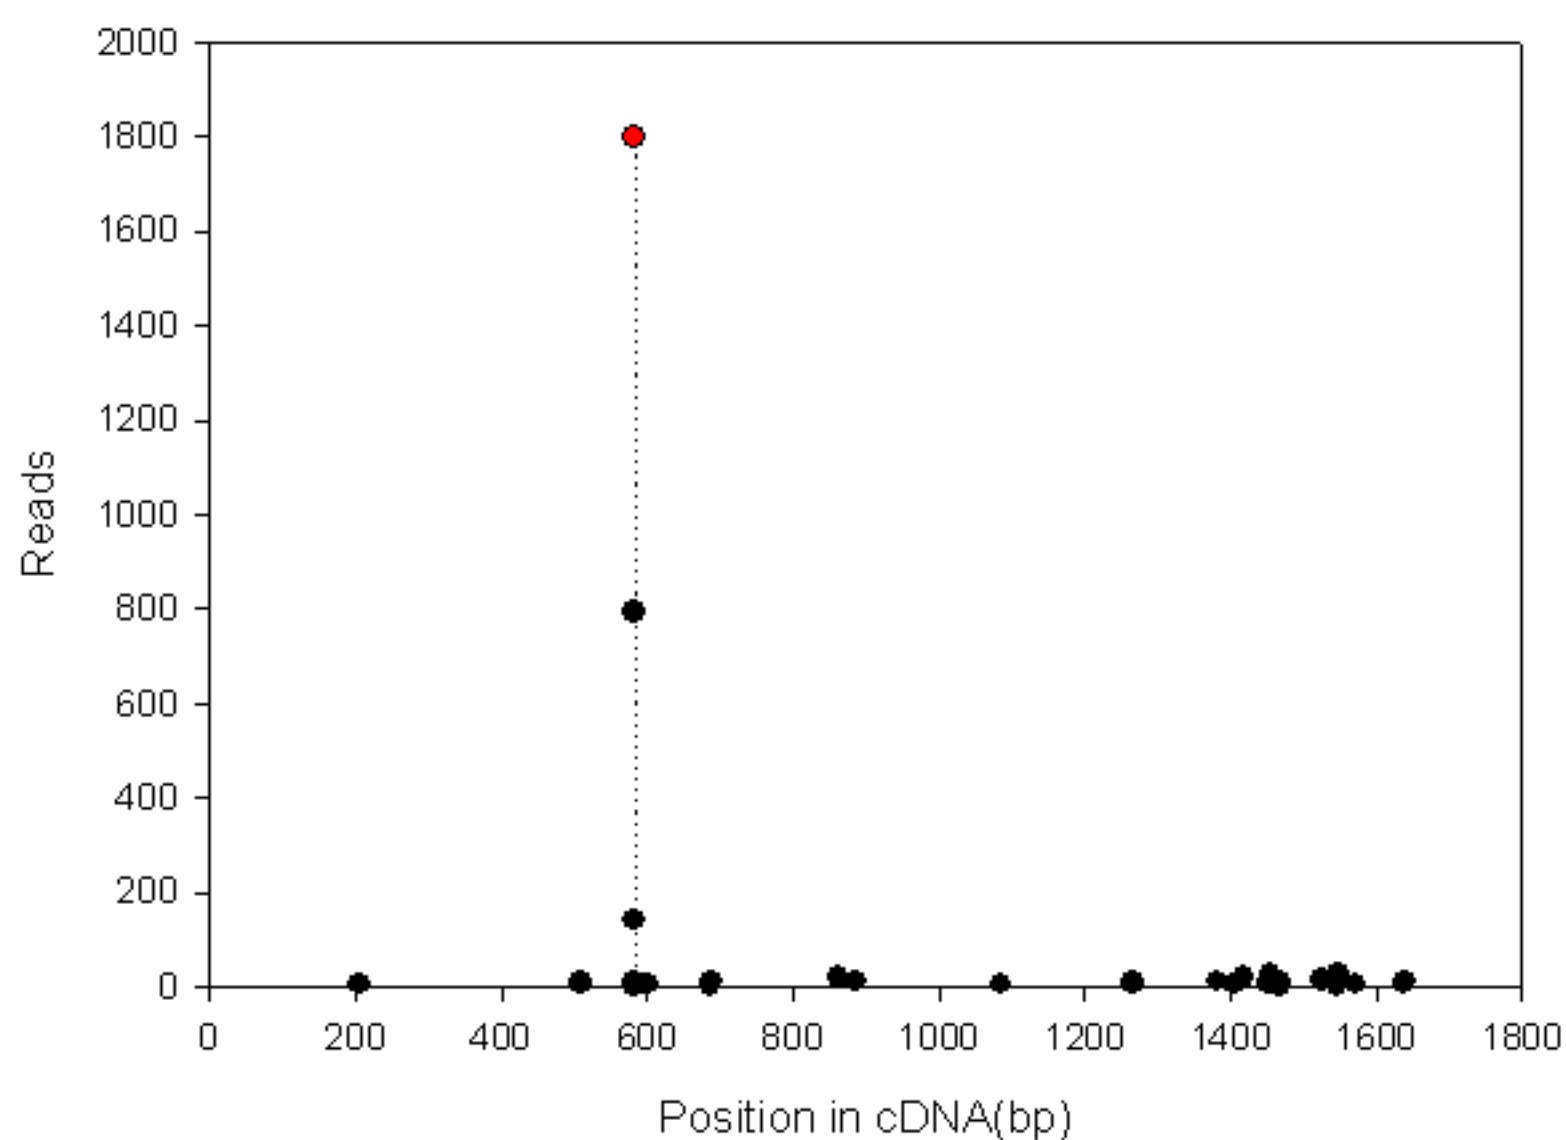

5' ACCGUUCAAGAAAGCCUGUGGAAUCA 3'  
 :::::::::::::: :::::  
 3' ----AAGUUCUUUCGG-CACCUU--- 5'

Orange1.1t03122.1  
 Csi-miR396d.4

Csi-miR397.1, target=Orange1.1t03059.1 gene=Orange1.1t03059  
 Category:3  
 Score=3.5  
 Cleavage Site=1926

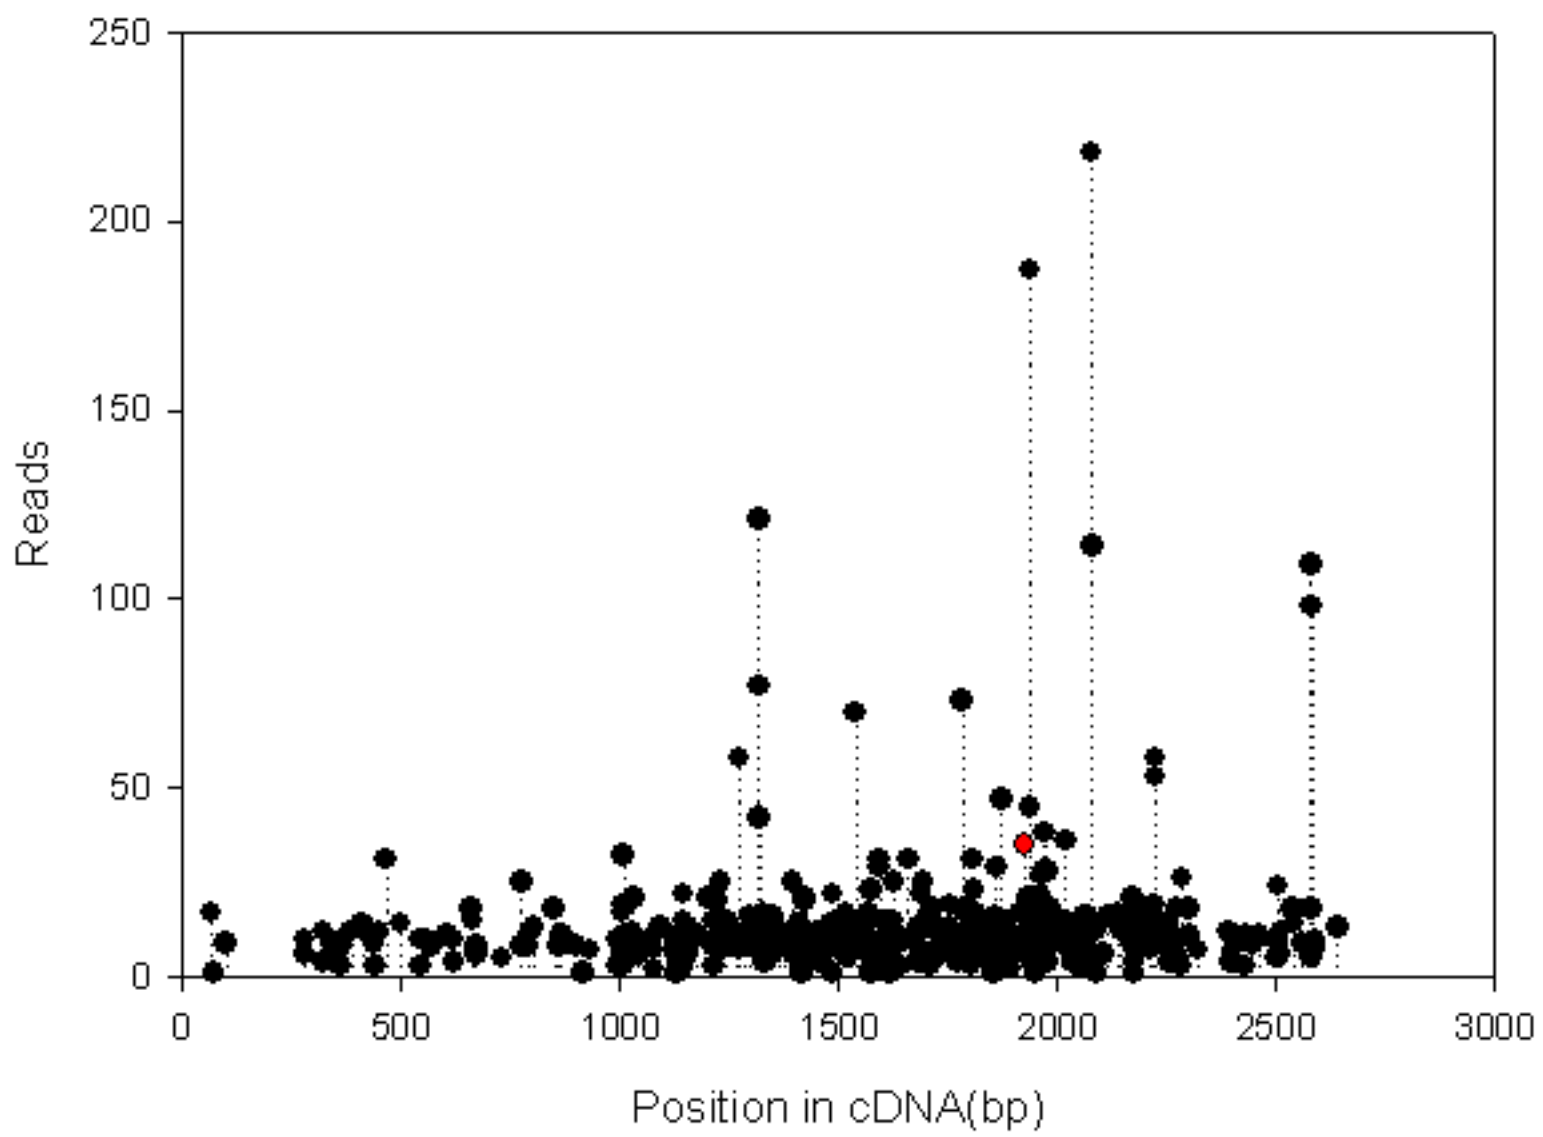

|                                  |                   |
|----------------------------------|-------------------|
| 5' UAGCAUGCAAUGGUGCACUCAUGAG 3'  | Orange1.1t03059.1 |
| ::: ::::.: ::::~::~::            |                   |
| 3' ---GUA-GUUGCGACGUGAGUUACU- 5' | Csi-miR397.1      |



Csi-miR397.2, target=Orange1.1t03059.1 gene=Orange1.1t03059  
 Category:3  
 Score=4.5  
 Cleavage Site=1926



```

5' UAGCAUGCAAUGGUGCACUCAUGAG 3'
   ::: :::: :::: :::: ::::
3' --AGUA-GUUGCGACGUGAGUUAC-- 5'

```

Orange1.1t03059.1  
 Csi-miR397.2

Csi-miR403.1, target=Cs2g10760.1 gene=Cs2g10760

Category:1

Score=0

Cleavage Site=3364

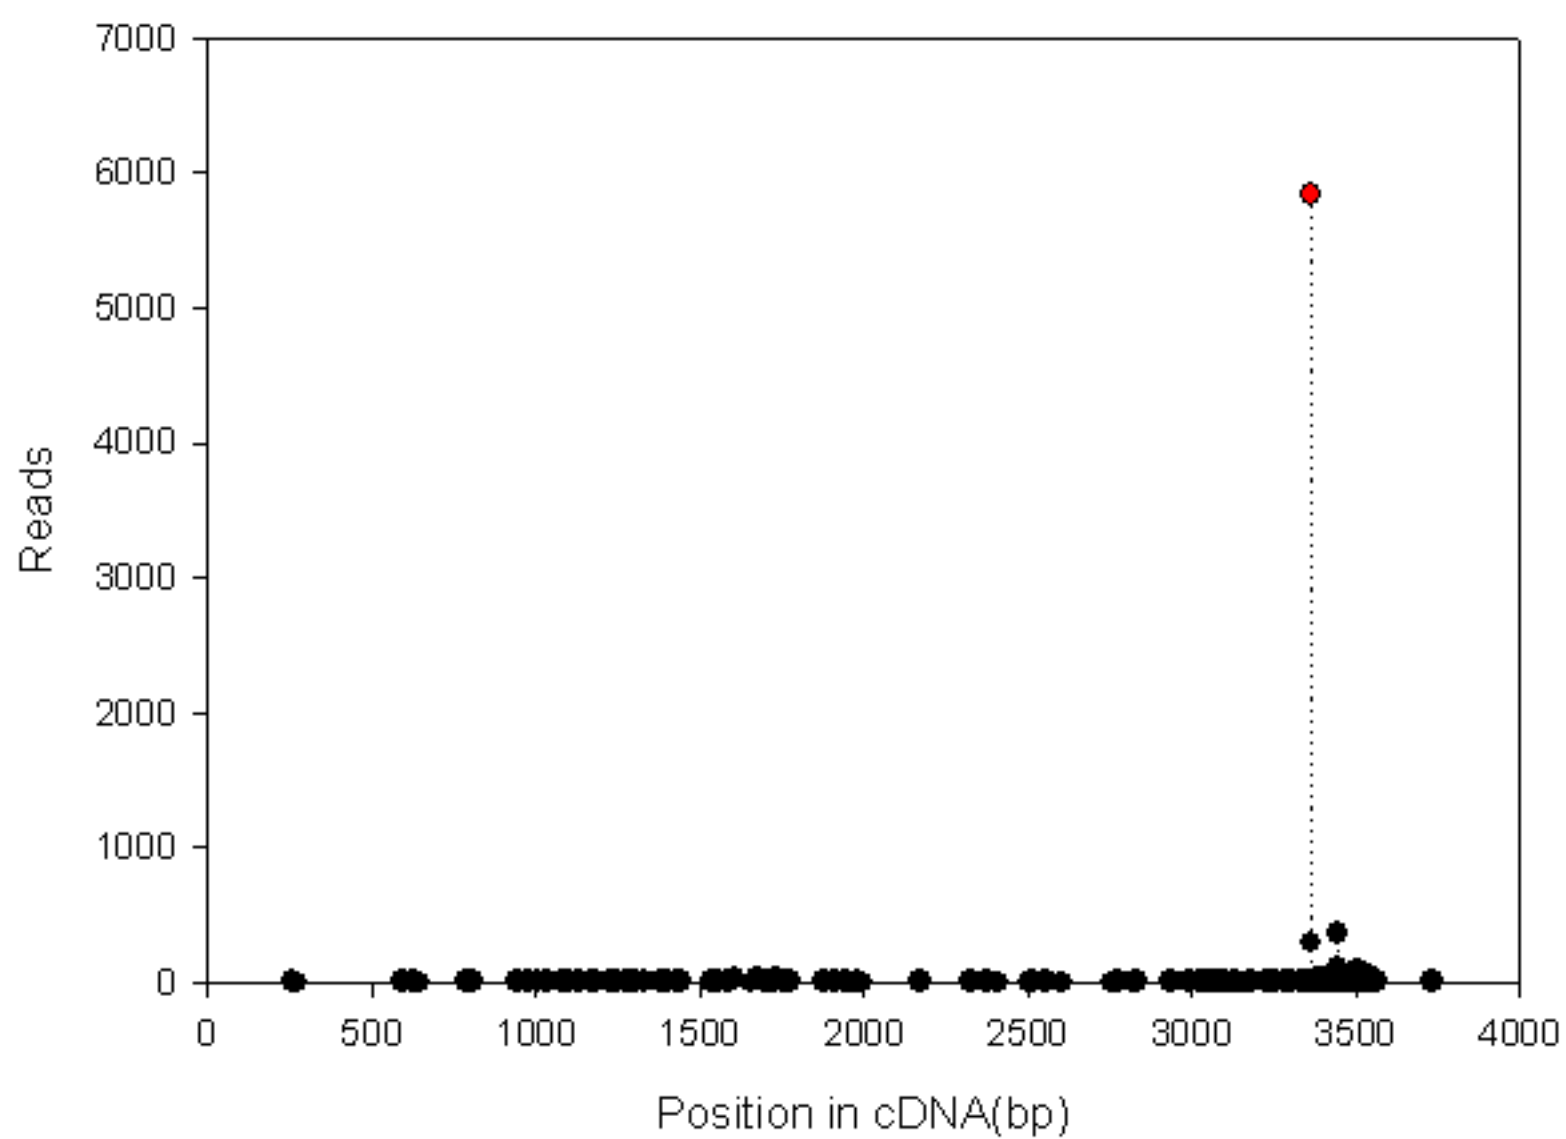

5' AGGAGUUUGUGCGUGAAUCUAAUGAG 3'

Cs2g10760.1

: : : : : : : : : : : : : : : : : :

3' ---UCAAACACGCACUUAGAUU--- 5'

Csi-miR403.1

Csi-miR403.1, target=Cs2g10770.1 gene=Cs2g10770  
 Category:3  
 Score=1  
 Cleavage Site=3478

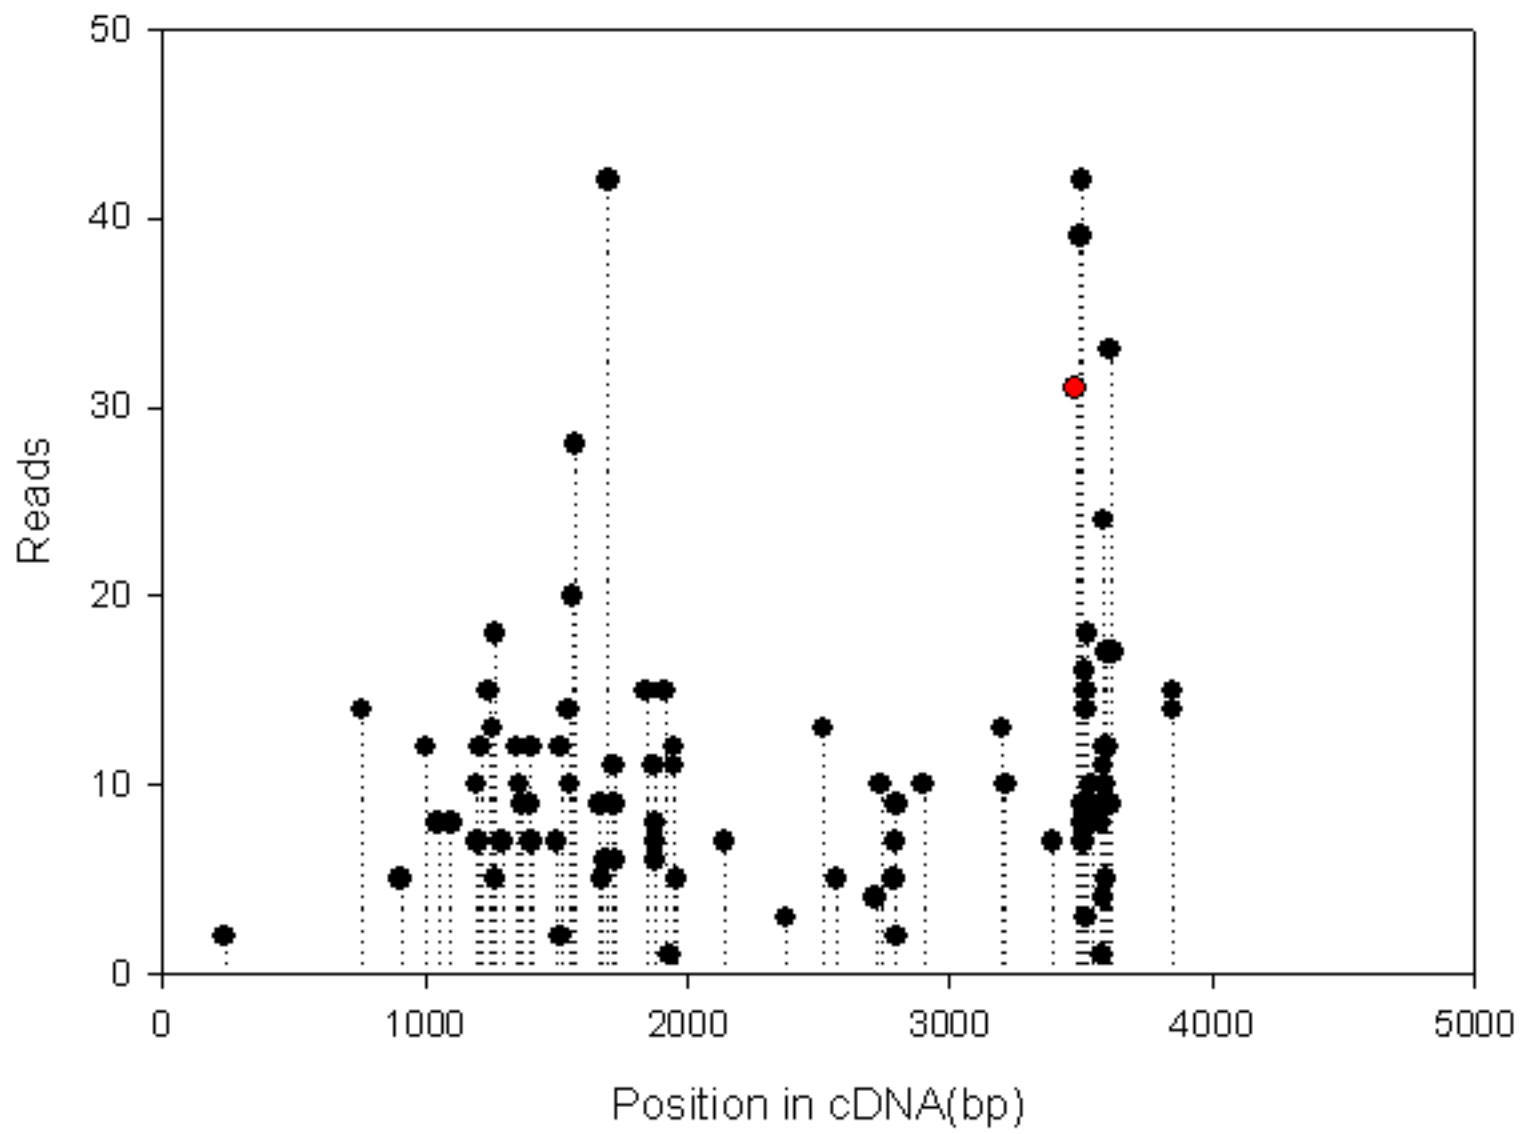

```

5' AGGAGUUCGUGCGUGAAUCUAAUGCG 3'      Cs2g10770.1
   : : : : : : : : : : : : : : : :
3' ---UCAAACACGCACUAGAUU--- 5'         Csi-miR403.1
  
```

Csi-miR403.1, target=Cs3g01650.1 gene=Cs3g01650  
 Category:2  
 Score=5  
 Cleavage Site=2428

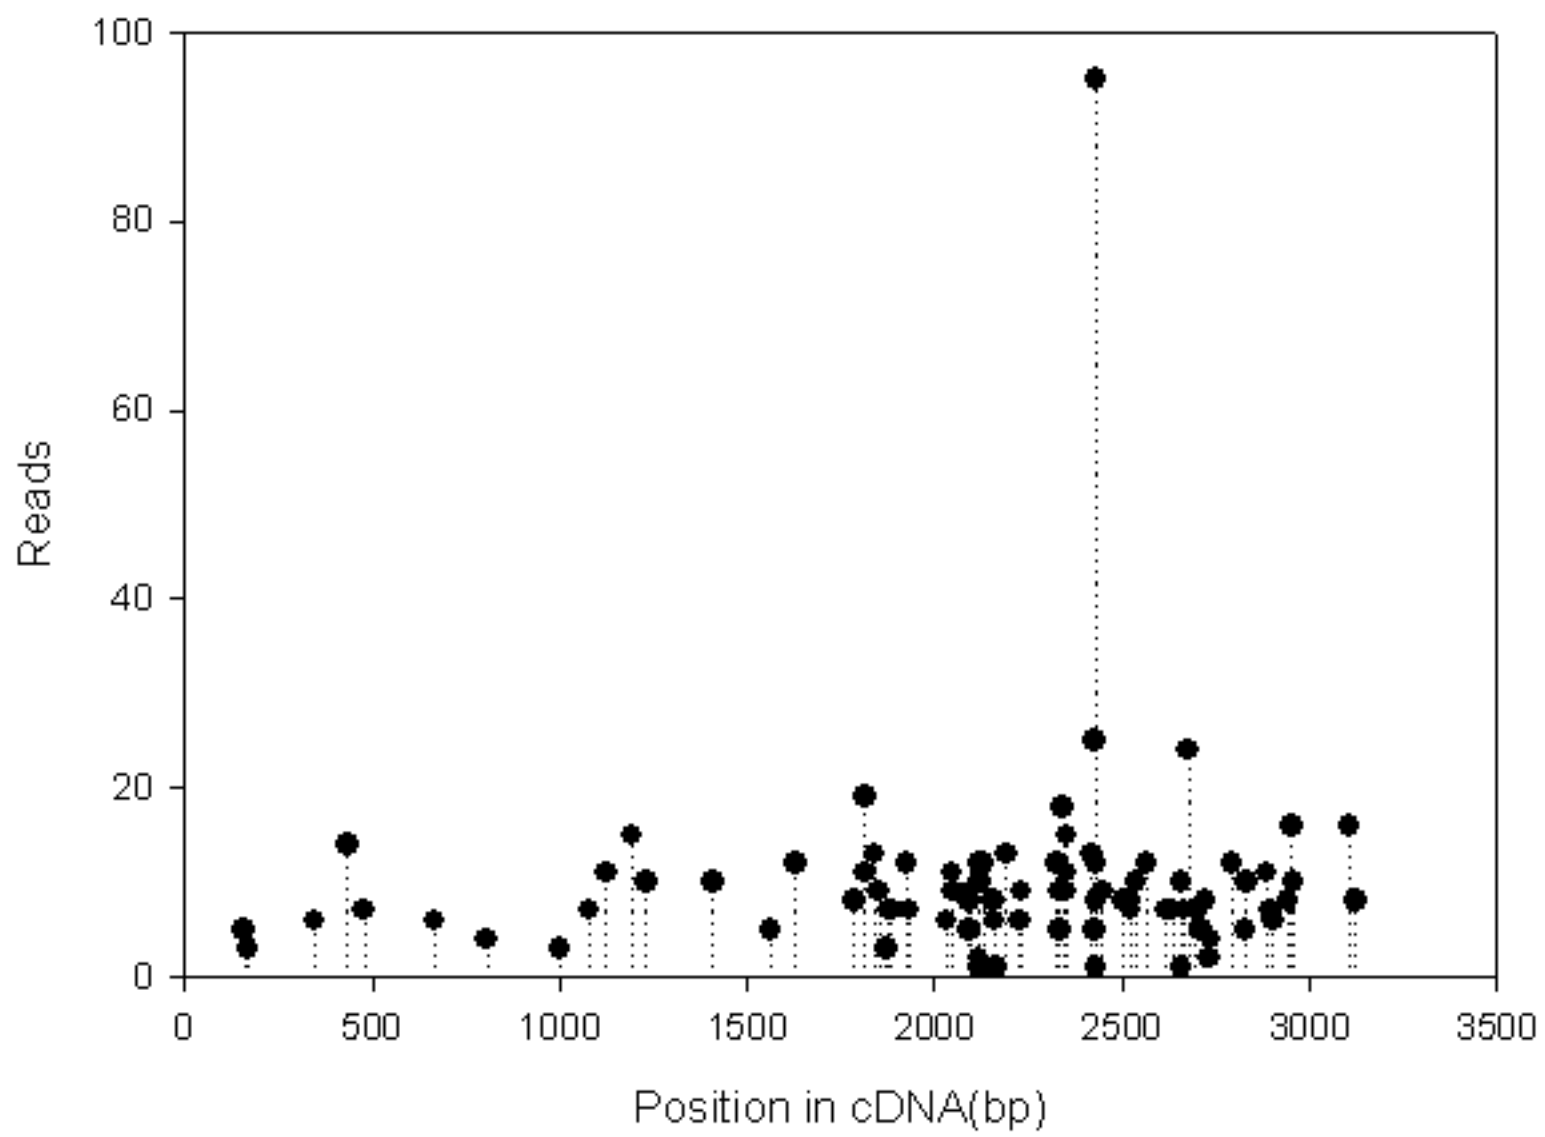

```

5' AGUUU-UGUGAGAAUUUAAGUGGAGCU 3'           Cs3g01650.1
   : : : : : : : : : : : : : : : :
3' UCAAACACGCACUUAGAUU----- 5'           Csi-miR403.1
  
```

Csi-miR403.1, target=Cs4g01460.1 gene=Cs4g01460  
 Category:1  
 Score=5  
 Cleavage Site=1693

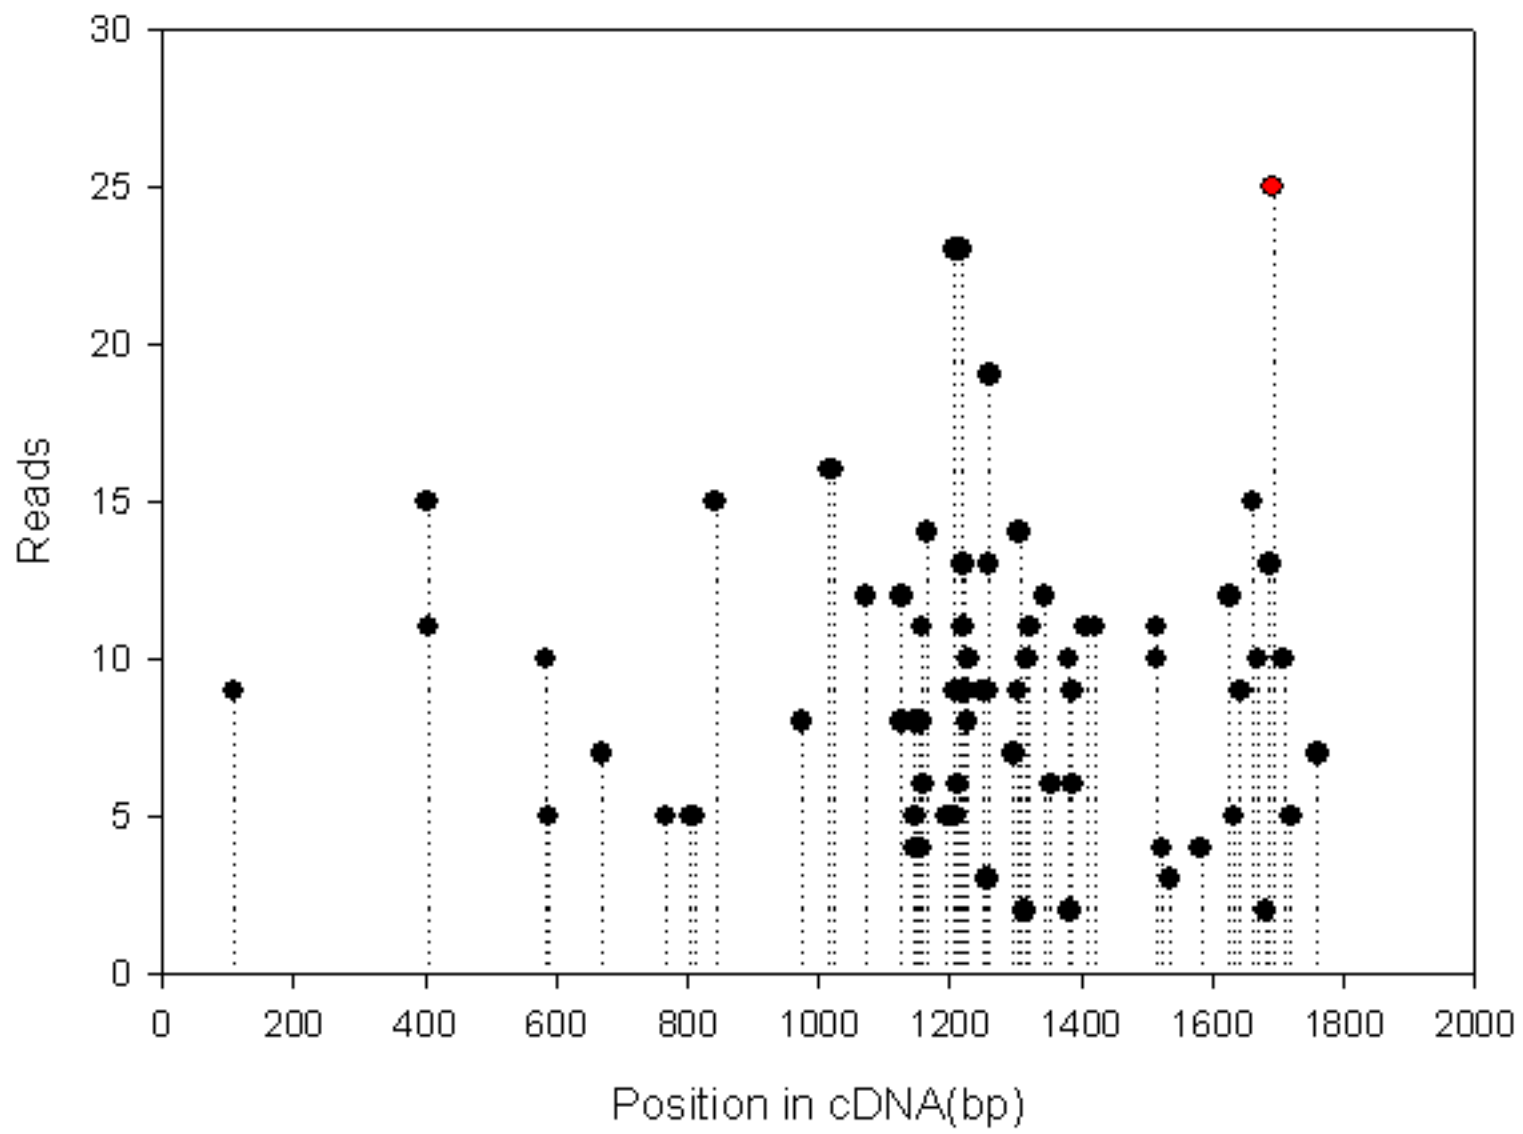

```

5' UGUGUAGACUUUGUGACUGAAUCUAA 3'      Cs4g01460.1
      : : : : : : : : : : : : : :
3' -----UCAAACACGCACUUAGAUU 5'      Csi-miR403.1
  
```

Csi-miR403.1, target=Cs4g19605.1 gene=Cs4g19605  
 Category:1  
 Score=5  
 Cleavage Site=792

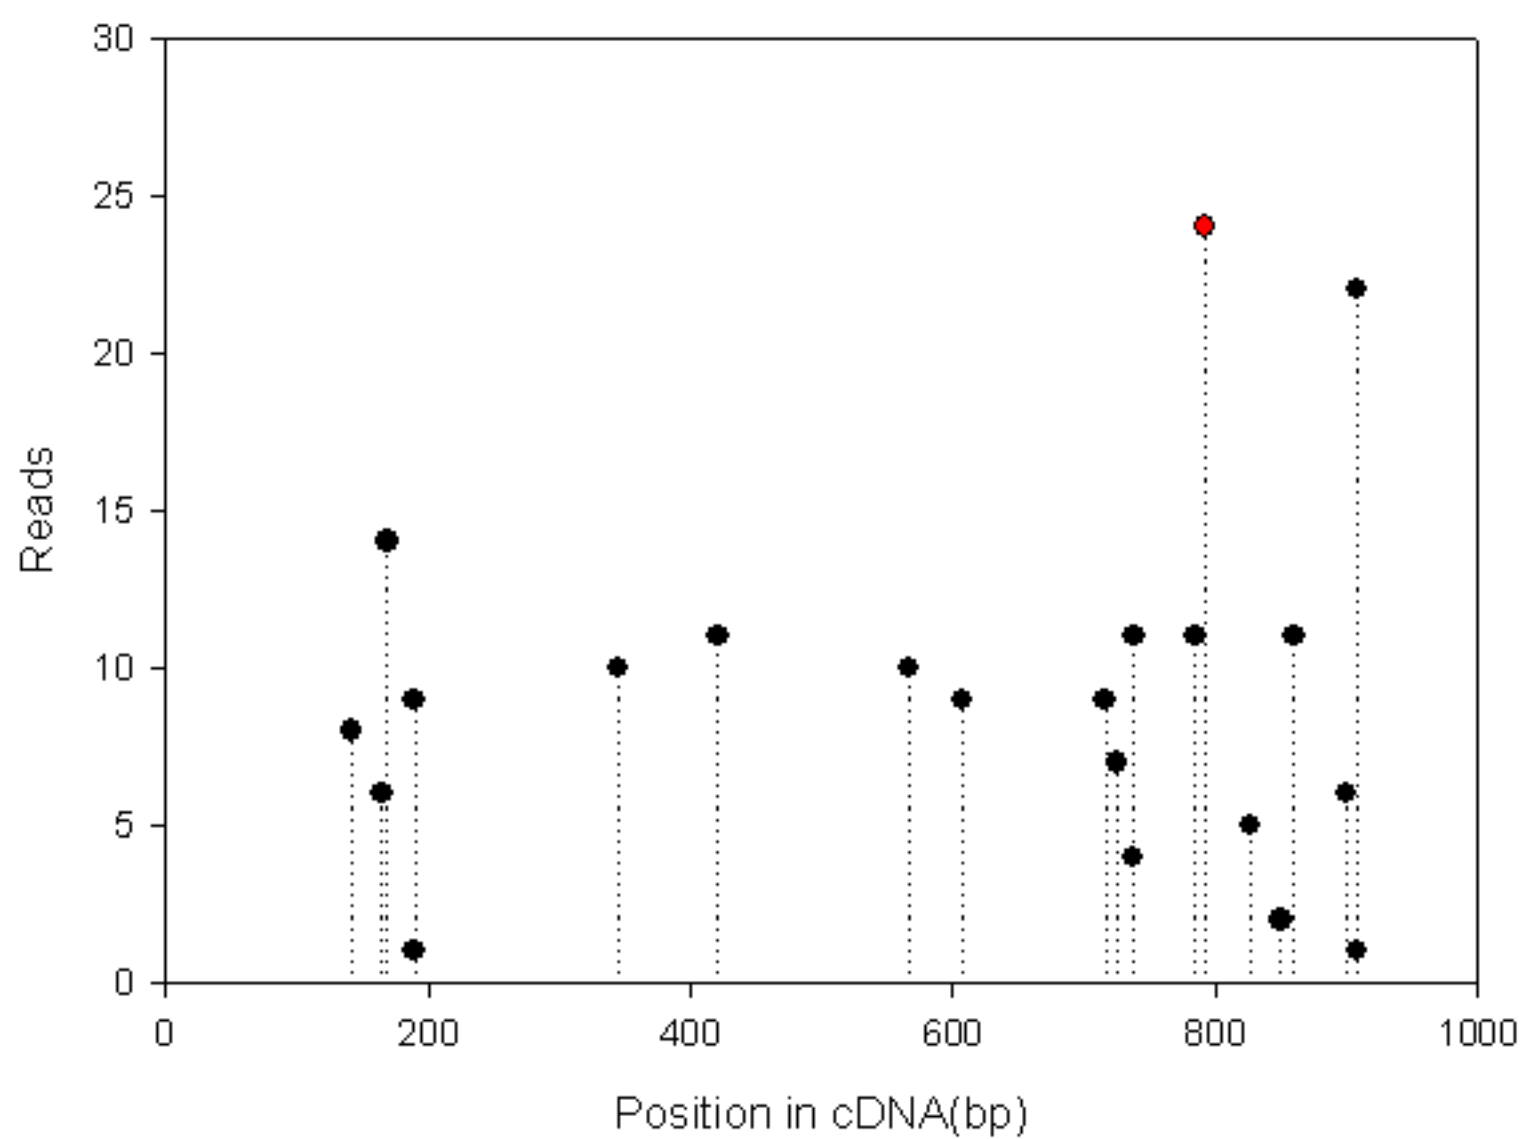

5' AGGUAUUUGUGUGUGGAUCUAUAU 3'

Cs4g19605.1

: : : : : : : : : : : : : : : : :

3' ---UCAAACACGCACUUAGAUU--- 5'

Csi-miR403.1

Csi-miR403.2, target=Cs2g10760.1 gene=Cs2g10760  
 Category:1  
 Score=1  
 Cleavage Site=3364

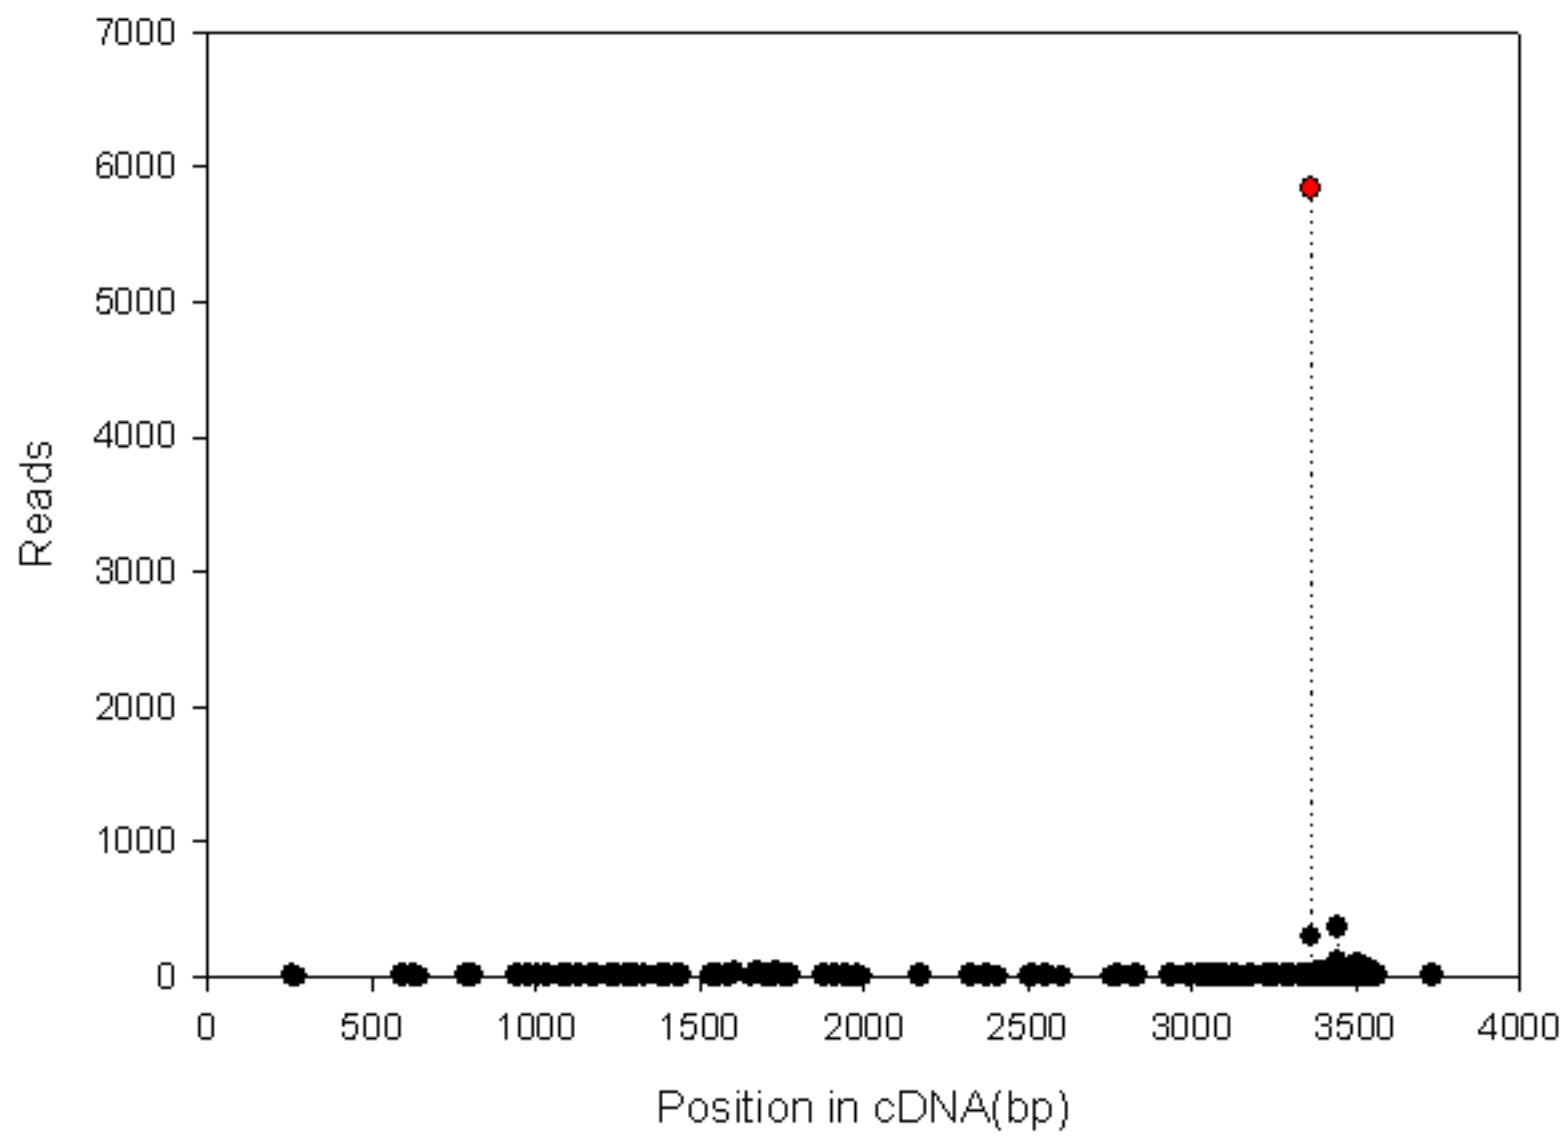

|    |                            |    |              |
|----|----------------------------|----|--------------|
| 5' | AGGAGUUUGUGCGUGAAUCUAAUGAG | 3' | cs2g10760.1  |
|    | :::::::::::::::::::::::::: |    |              |
| 3' | -GCUCAAACACGCACUUAGAUU---- | 5' | Csi-miR403.2 |

Csi-miR403.2, target=Cs2g10770.1 gene=Cs2g10770  
 Category:3  
 Score=2  
 Cleavage Site=3478

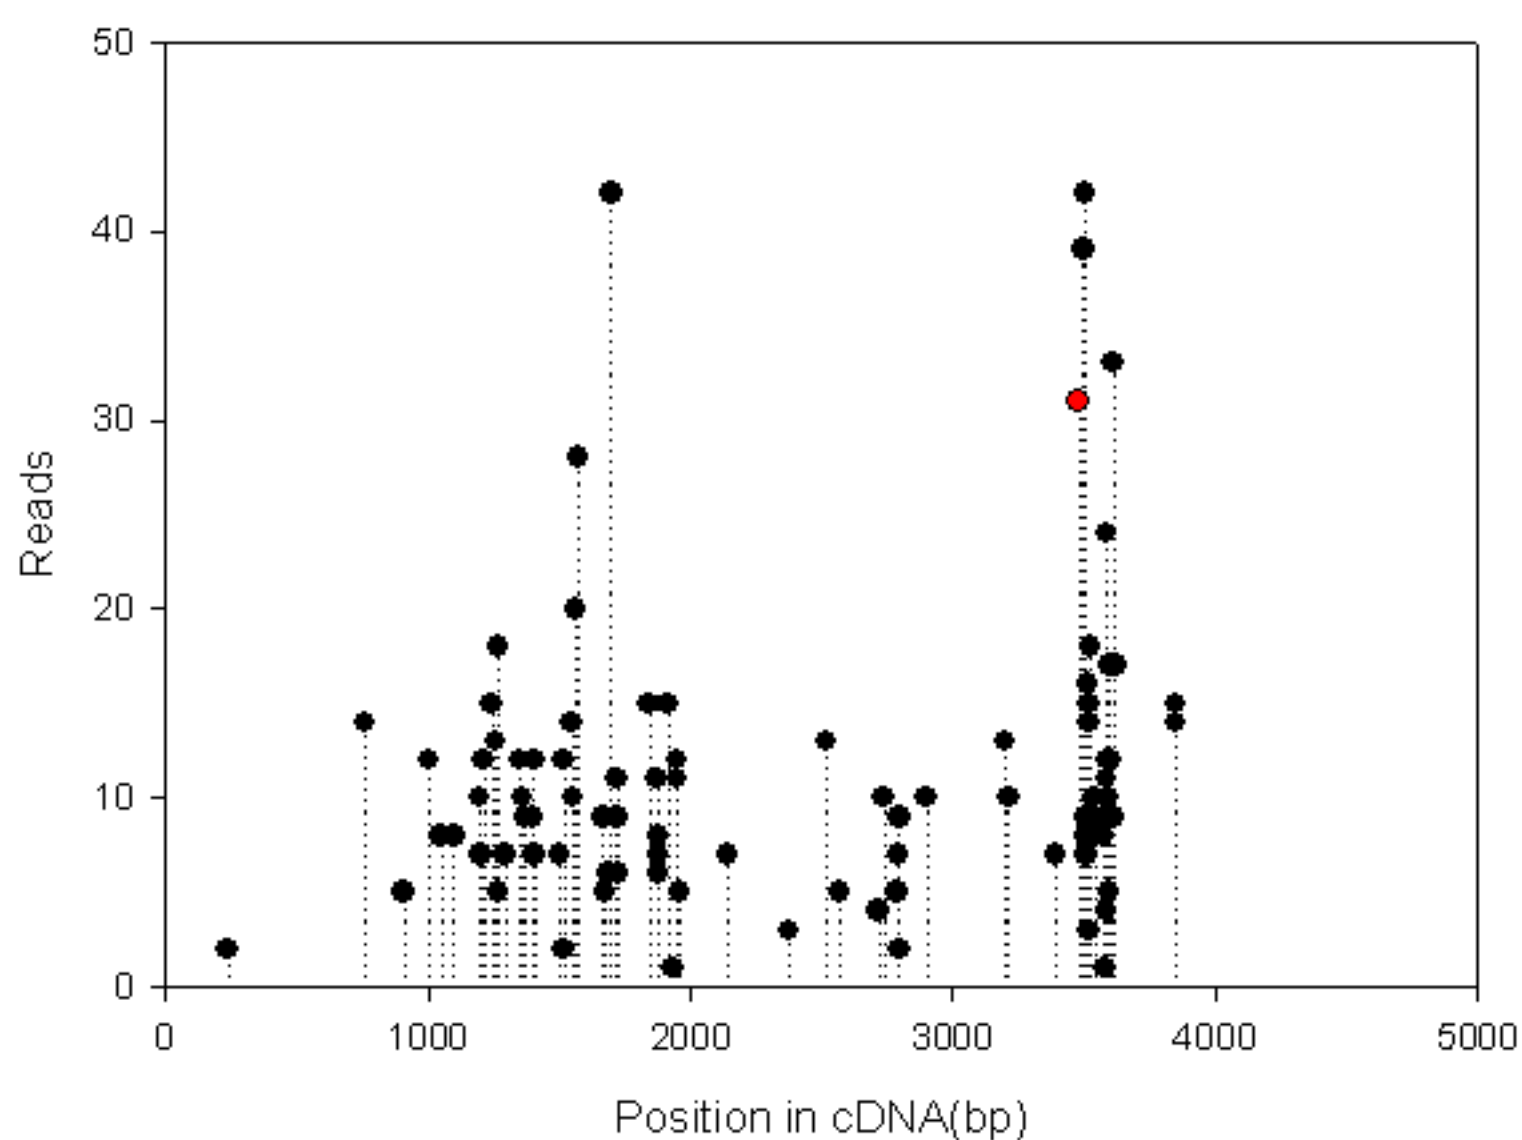

```

5' AGGAGUUCGUGCGUGAAUCUAAUGCG 3'      Cs2g10770.1
   ::::: ::::::::::::::::::::
3' -GCUCAAACACGCACUUAGAUU----- 5'     Csi-miR403.2

```



Csi-miR403.3, target=Cs2g10760.1 gene=Cs2g10760  
 Category:1  
 Score=0  
 Cleavage Site=3364

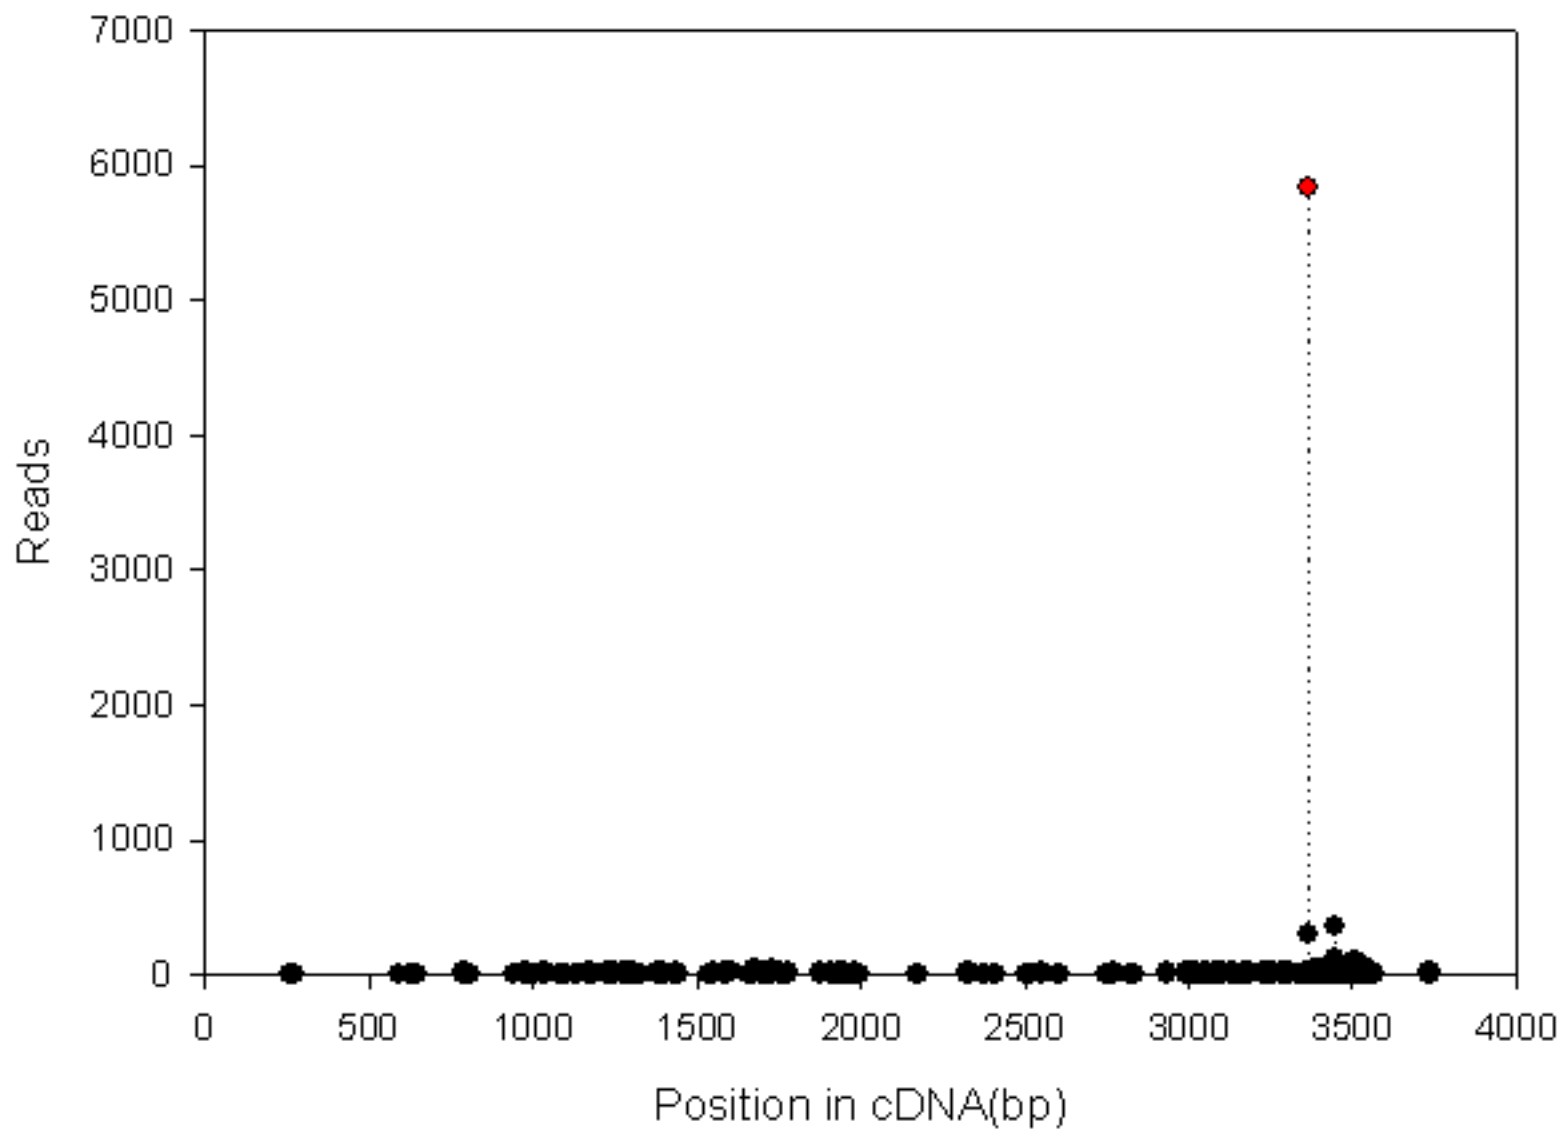

```

5' AGGAGUUUGUGCGUGAAUCUAAUGAG 3'      Cs2g10760.1
      ::::::::::::::::::::
3' ----CAAACACGCACUAGAUU---- 5'      Csi-miR403.3

```

Csi-miR403.3, target=Cs2g10770.1 gene=Cs2g10770  
 Category:3  
 Score=1  
 Cleavage Site=3478



```

5' AGGAGUUCGUGCGUGAAUCUAAUGCG 3'          Cs2g10770.1
   ::: ::::::::::::::::::::
3' ----CAAACACGCACUUAGAUU---- 5'          Csi-miR403.3
  
```

Csi-miR403.3, target=Cs3g01650.1 gene=Cs3g01650  
 Category:1  
 Score=5  
 Cleavage Site=2429

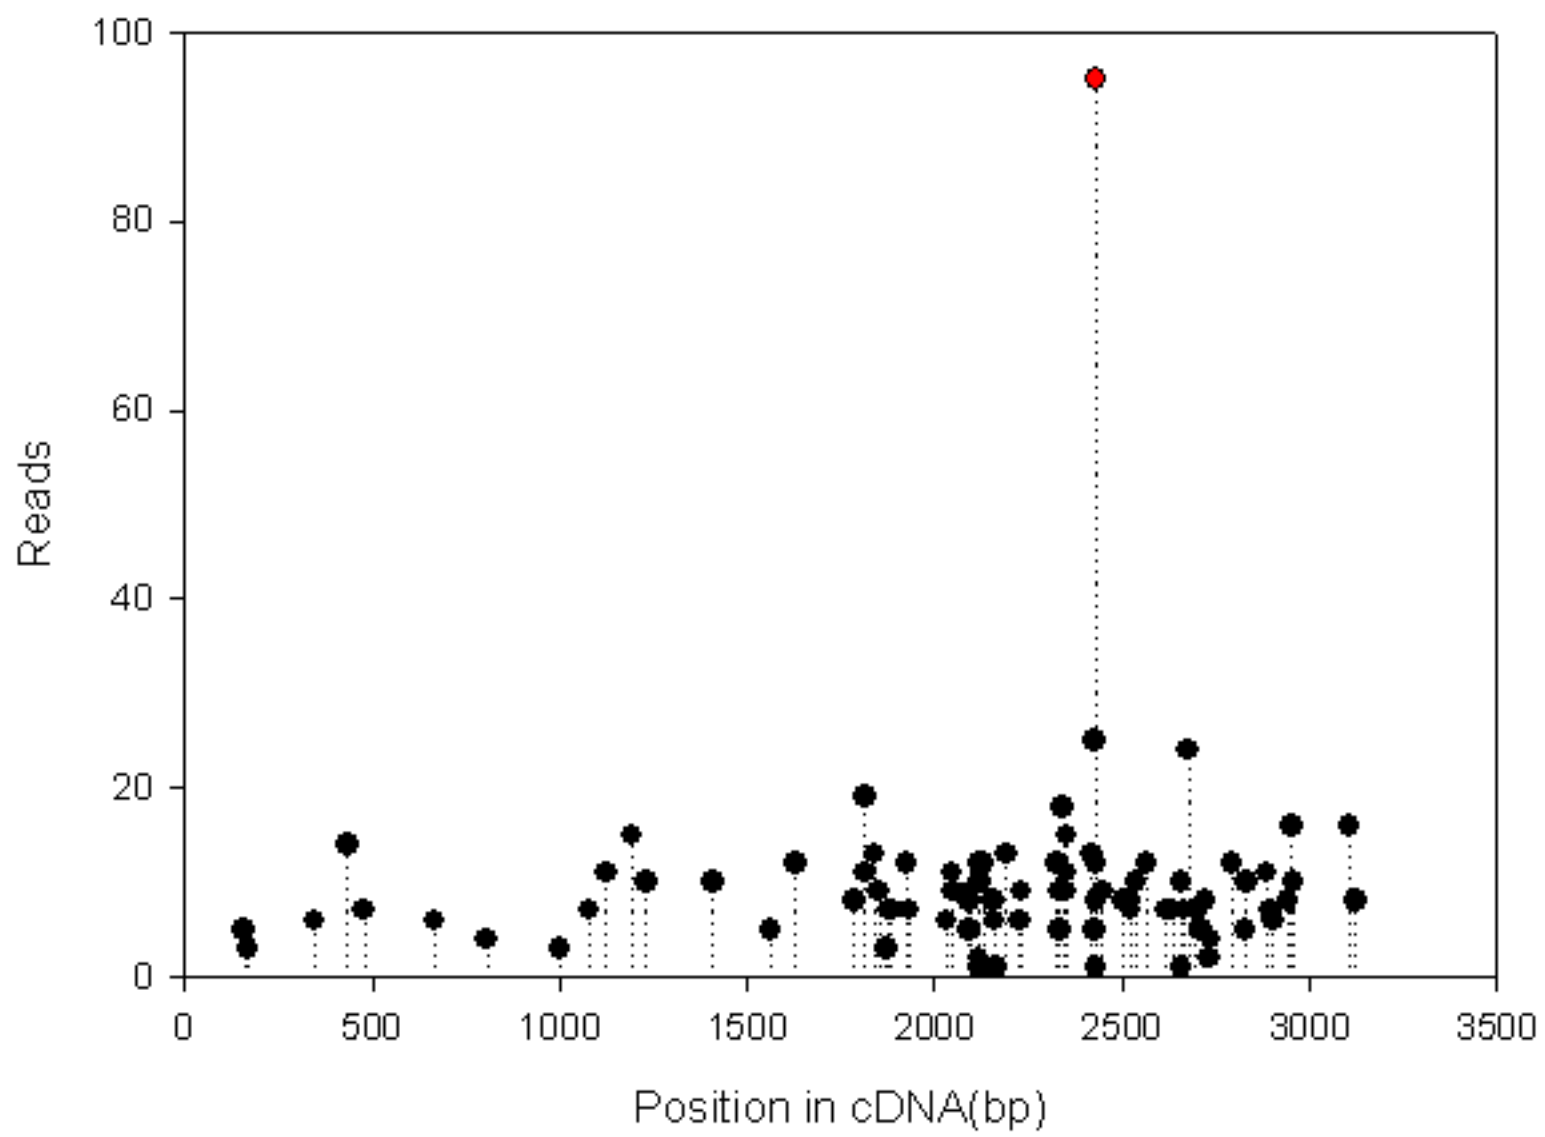

```

5' GUUU-UGUGAGAAUUUAAGUGGAGCUG 3'      Cs3g01650.1
   :::: :::: :::::
3' CAAACACGCACUUAGAUU----- 5'      Csi-miR403.3
  
```

Csi-miR403.3, target=Cs4g01460.1 gene=Cs4g01460  
 Category:1  
 Score=5  
 Cleavage Site=1693



```

5' UGUGUAGACUUUGUGACUGAAUCUAA 3'          Cs4g01460.1
      :::::  :::::::::::
3' -----CAAACACGCACUUAGAUU 5'          Csi-miR403.3
  
```

Csi-miR403.3, target=Cs4g19605.1 gene=Cs4g19605  
 Category:1  
 Score=4  
 Cleavage Site=792



5' AGGUAUUUGUGUGUGGAUCUAUAU 3'  
 :::::.....  
 3' ----CAAACACGCACUUAGAUA---- 5'

Cs4g19605.1

Csi-miR403.3

Csi-miR444a.1, target=Cs9g07680.1 gene=Cs9g07680  
 Category:3  
 Score=3  
 Cleavage Site=121

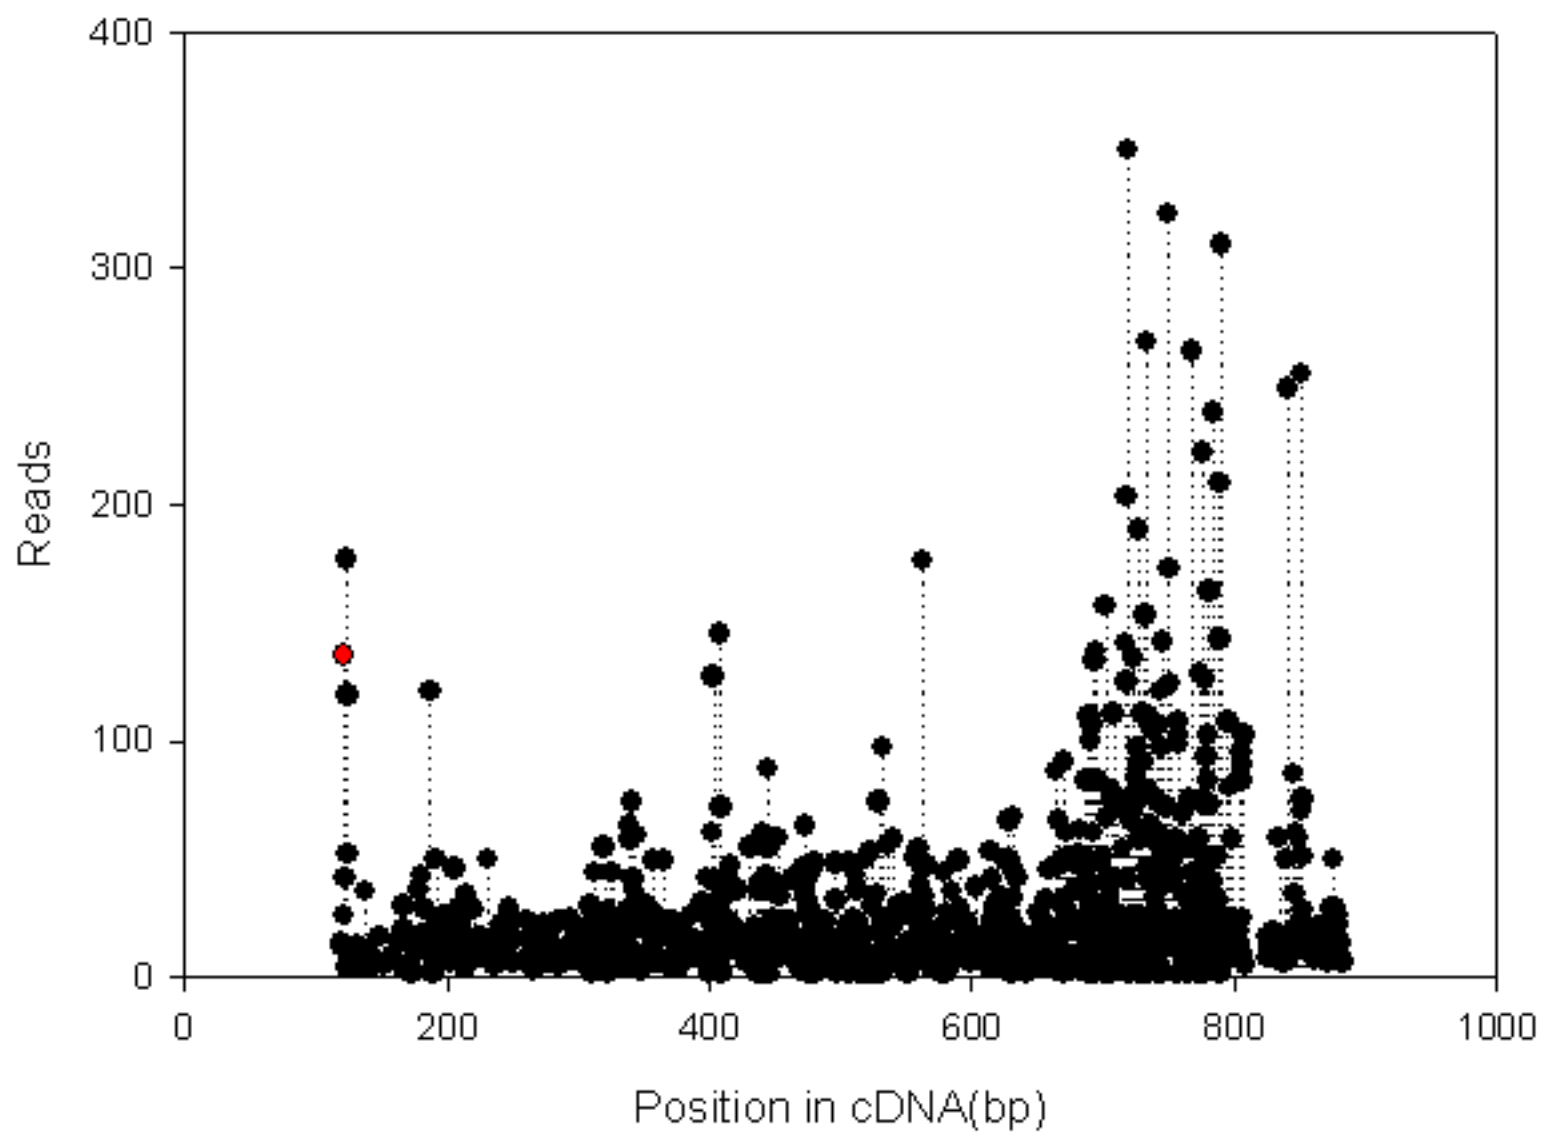

```

5' UUGC-UCUCUUGUCUCAAGAAUUGCA 3'      Cs9g07680.1
   : : : : : : : : : : : : : : : :
3' -ACGUACAAAACAGAGUUCUUU----- 5'    Csi-miR444a.1

```

Csi-miR444a.1, target=Orange1.1t02003.1 gene=Orange1.1t02003  
 Category:3  
 Score=5  
 Cleavage Site=544

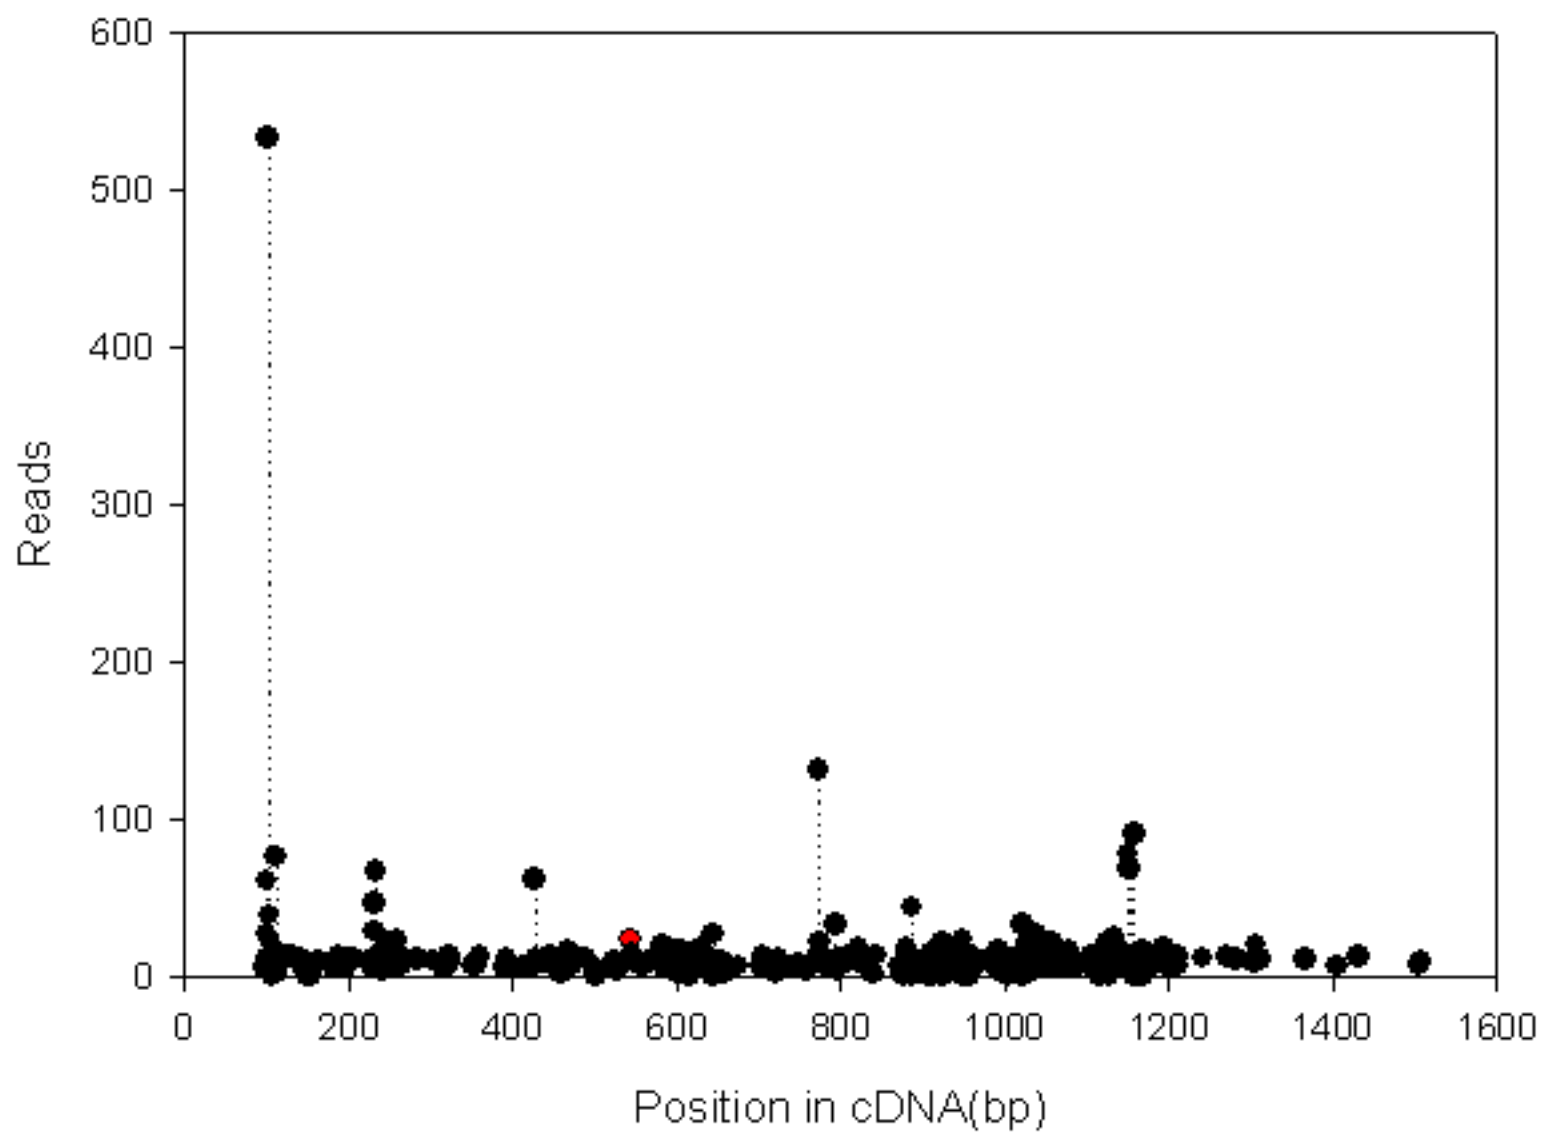

```

5' UUUGCUUGC UUUGUC-CAAGAAAGUAA 3'      Orange1.1t02003.1
   :::  ::  :::::  :::::
3' --ACGUACAAAACAGAGUUCUUU---- 5'      Csi-miR444a.1
  
```

Csi-miR472, target=Cs2g30590.1 gene=Cs2g30590

Category:1

Score=5

Cleavage Site=889

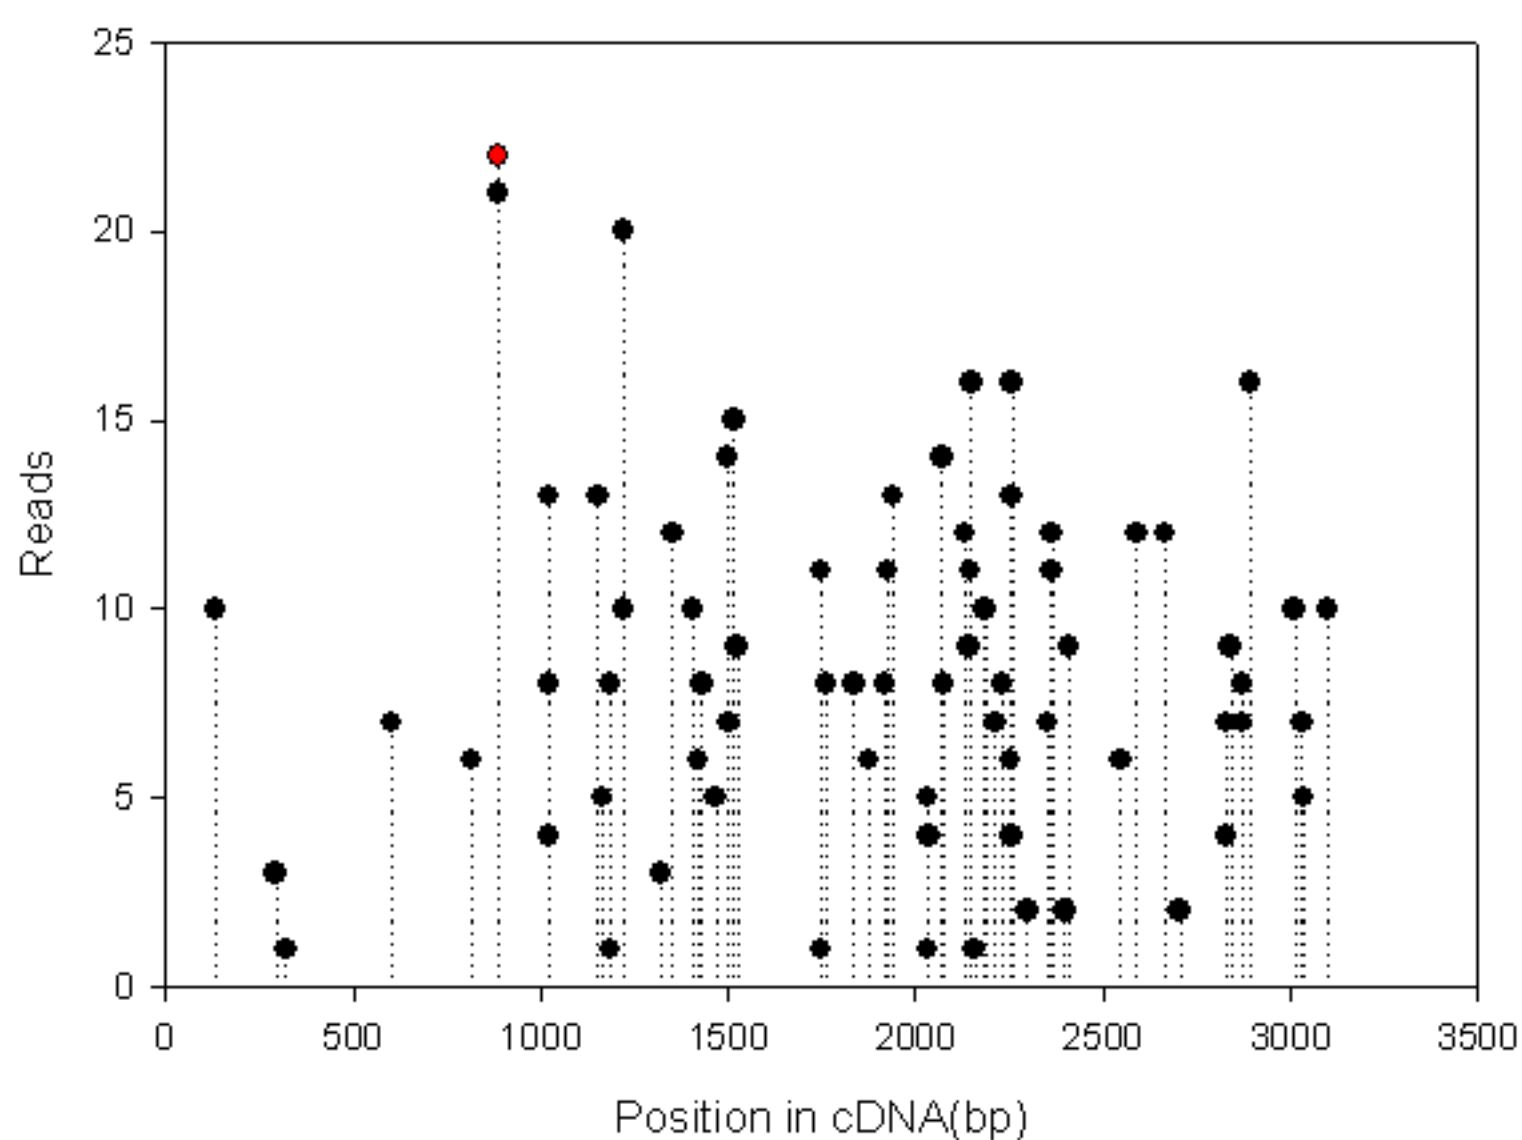

5' GGUAUGGGAGGUUUGGGCAAACAAC 3'

Cs2g30590.1

:: ::::: ::::: ::::

3' CCCUACCCUCCACACCCUUUU----- 5'

Csi-miR472



Csi-miR472, target=Cs7g26730.1 gene=Cs7g26730  
 Category:1  
 Score=3  
 Cleavage Site=1411

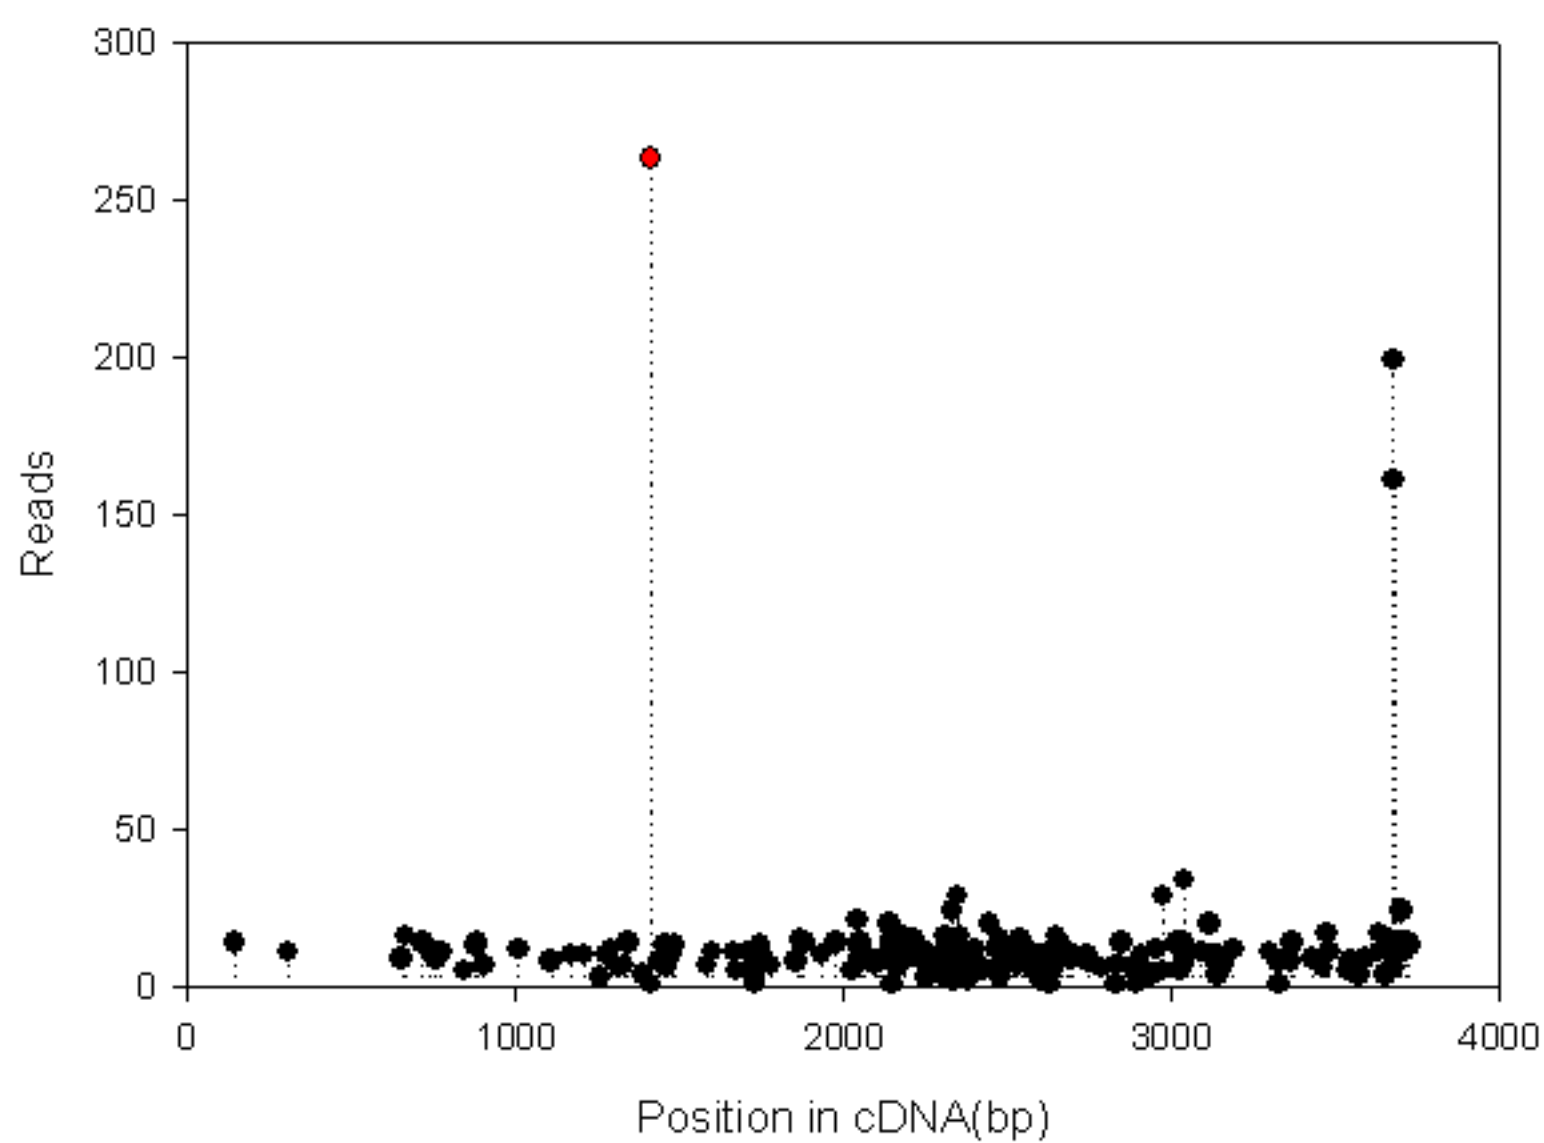

```

5' GAGAAGAGAGGUGUGGGAAAAUGCAA 3'      Cs7g26730.1
  : : : : : : : : : : : : : : :
3' CCCUACCCUCCACACCCUUUU----- 5'     Csi-miR472

```

Csi-miR473-3p, target=Cs1g08770.1 gene=Cs1g08770  
 Category:3  
 Score=4  
 Cleavage Site=1281

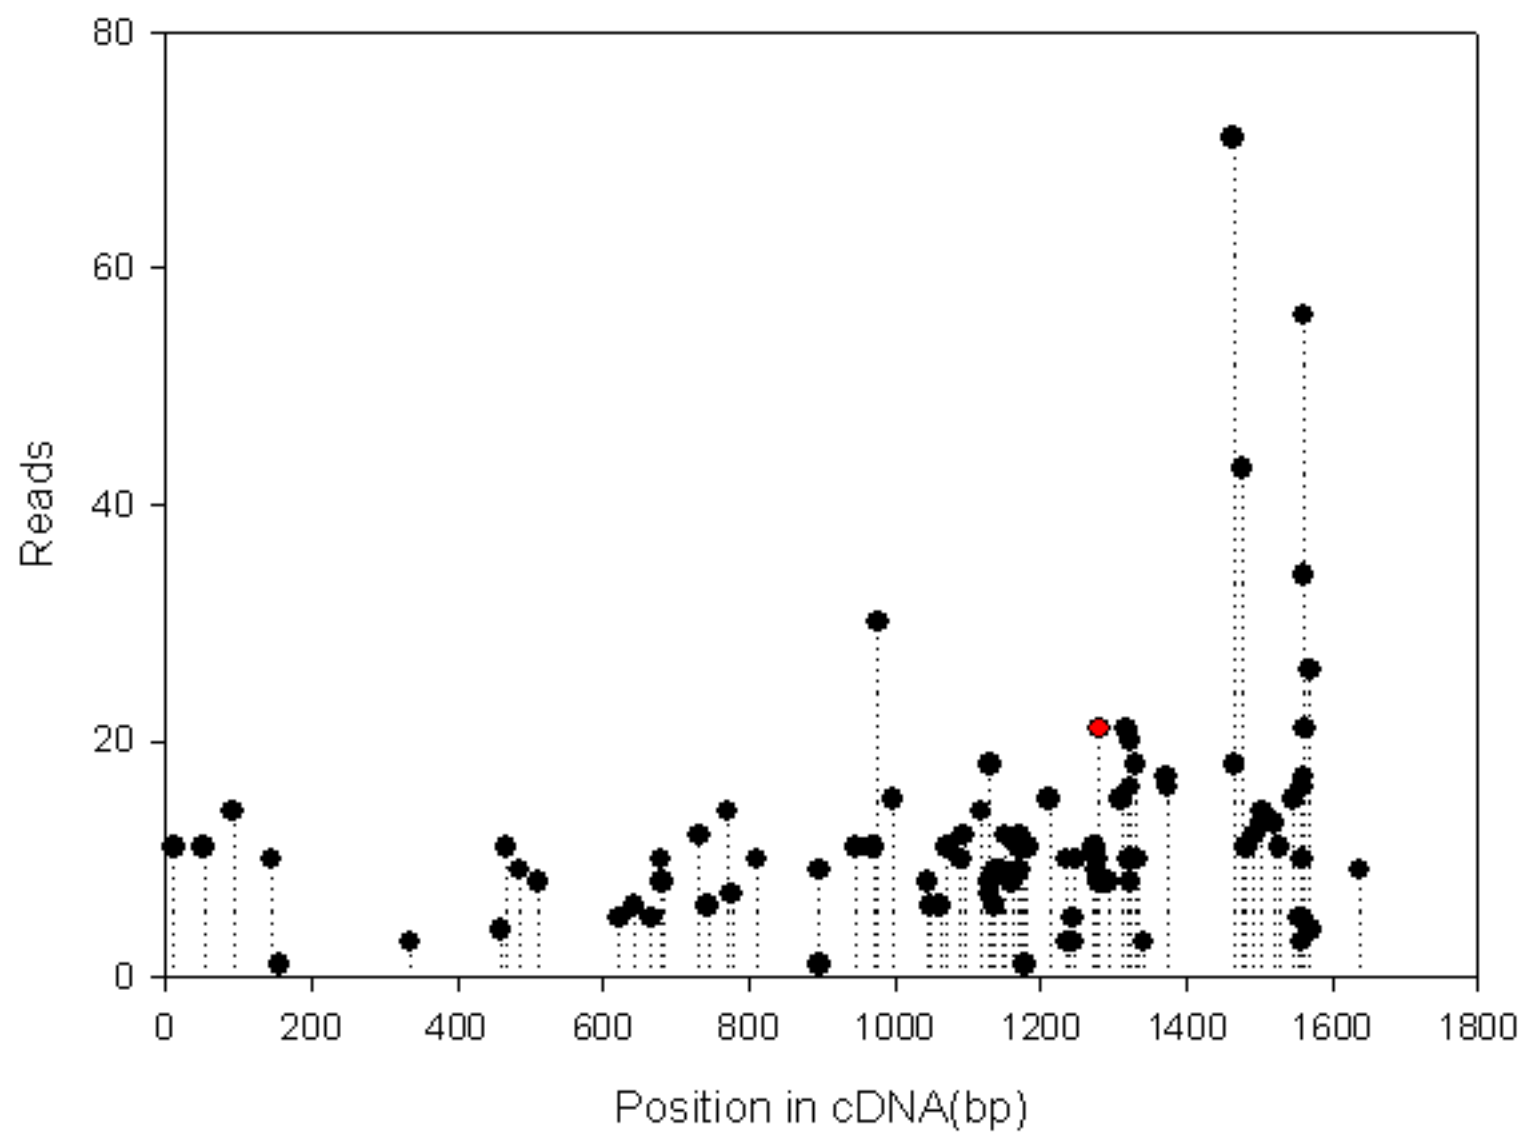

```

5' UGUCAUAC-UCCCCAAGGACUUUGAAA 3'      Cs1g08770.1
   . . . . . : . . . . .
3' --AGUGAGUUGGGGUUCCUGAAG----- 5'    Csi-miR473-3p
  
```

Csi-miR477a-3p, target=Cs7g09520.1 gene=Cs7g09520  
Category:2  
Score=5  
Cleavage Site=461

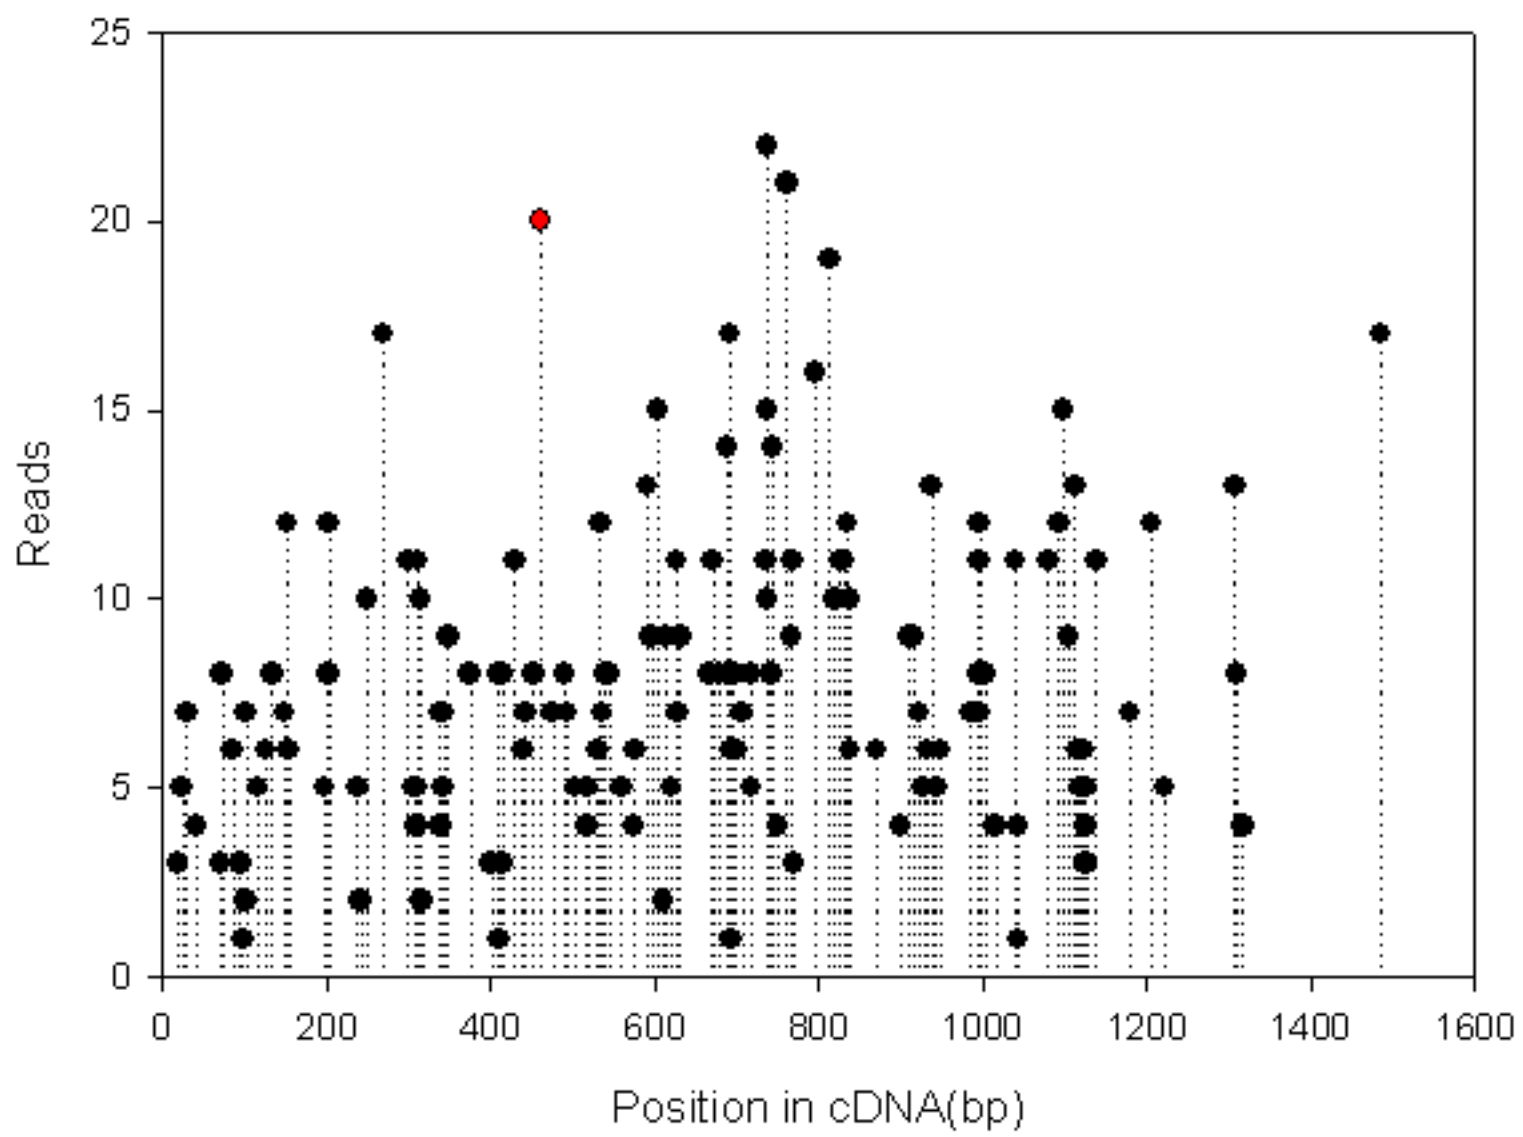

```
5' GGGUCCACCUCUAGGGUUUCGGAU 3'
   : : : : : : : : : : : : :
3' --GCUGGAGGGGGAUCCCAAAGG--- 5'
```

Cs7g09520.1

Csi-miR477a-3p

Csi-miR482a-3p, target=Cs5g18480.1 gene=Cs5g18480  
 Category:1  
 Score=5  
 Cleavage Site=700

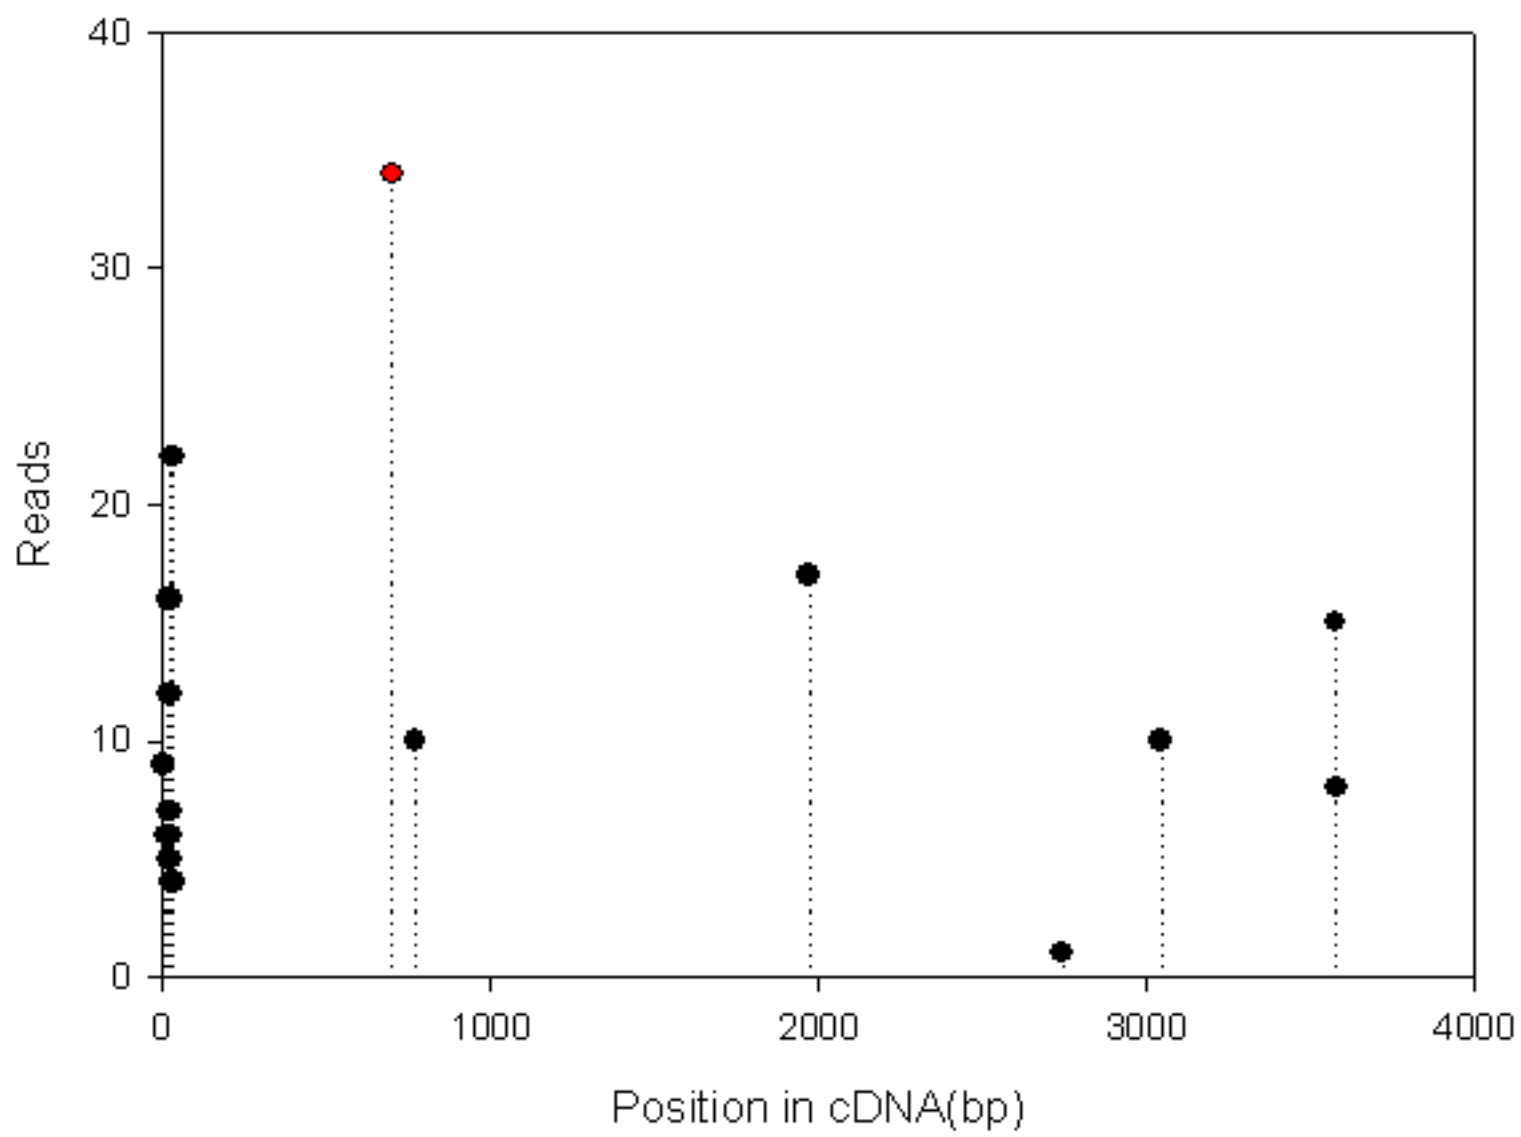

5' GGCAUGGGUGGUAUAGGCAAGACAAC 3'  
 :: ::::: ::.::::: :::::  
 3' CCUUAACCCUCCGUAUCCCUUCU---- 5'

Cs5g18480.1

Csi-miR482a-3p

Csi-miR482a-3p, target=Cs5g19920.1 gene=Cs5g19920  
 Category:1  
 Score=5  
 Cleavage Site=715



5' GGCAUGGGUGGUUAUAGGCAAGACAAC 3'  
 :: :::: ::.::::: ::::  
 3' CCUACCCUCCGUAUCCCUUCU---- 5'

Cs5g19920.1

Csi-miR482a-3p

Csi-miR482b, target=Cs1g11740.1 gene=Cs1g11740  
 Category:1  
 Score=4.5  
 Cleavage Site=2101

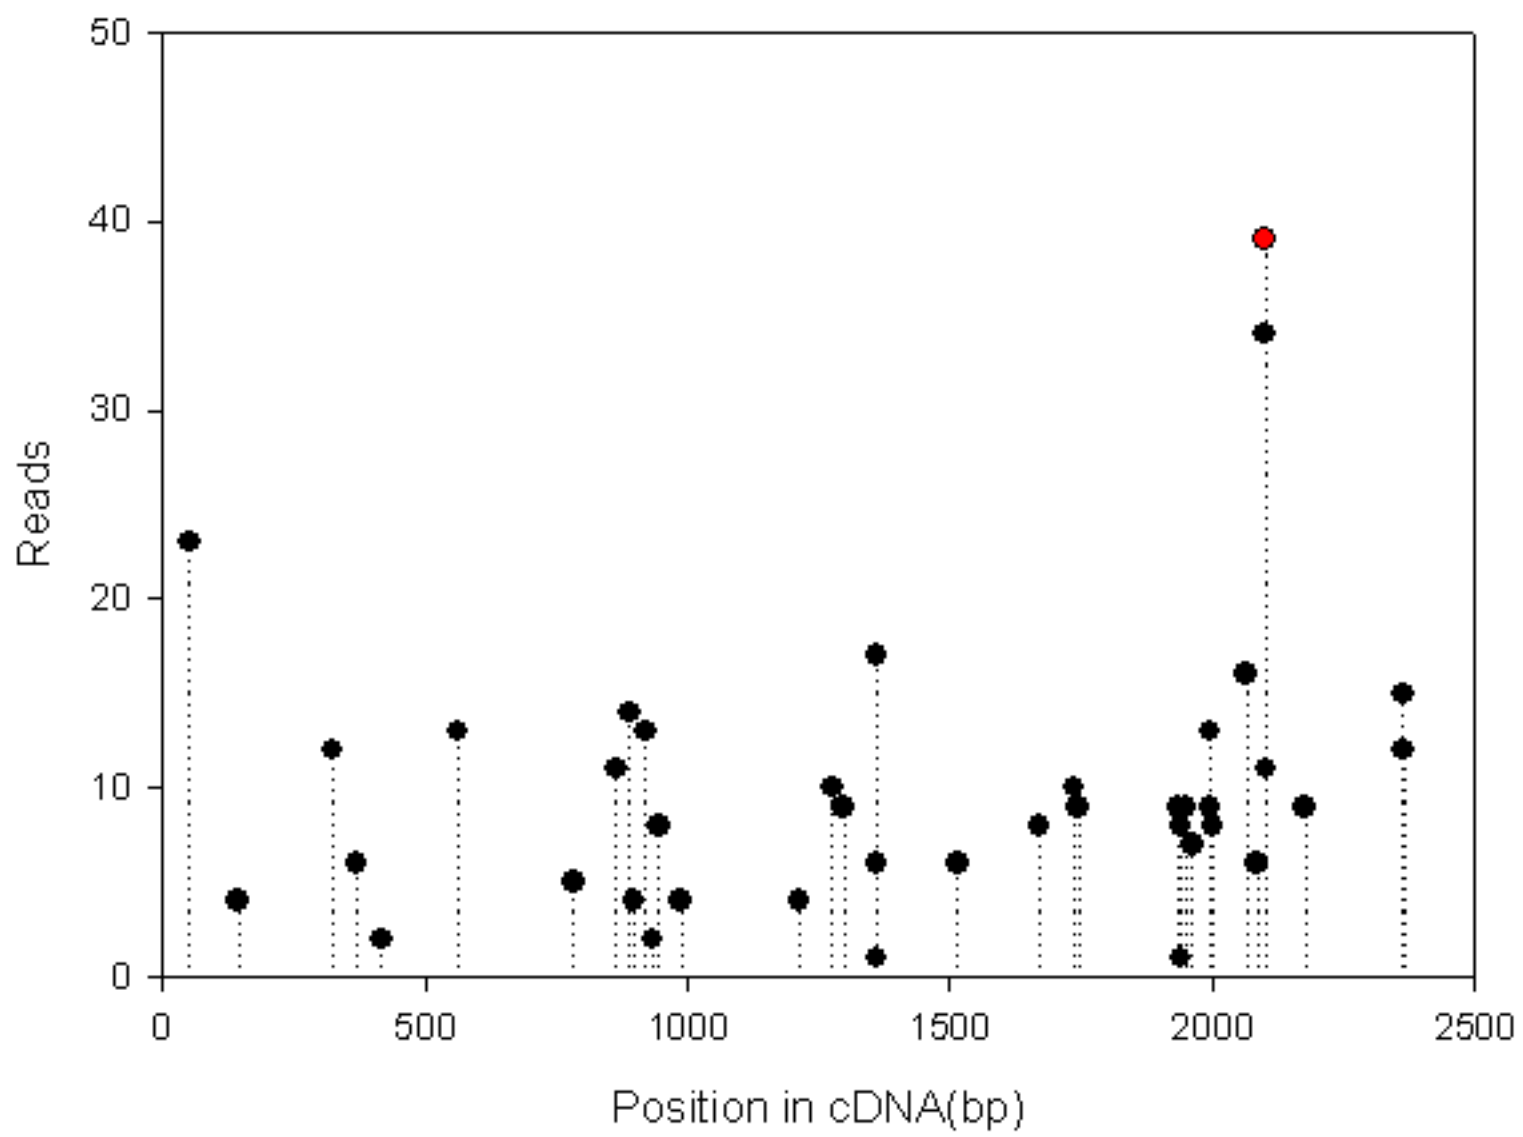

5' GCGGCGUGGGGGGAGUGGGCAAGGUU 3'  
 :: .::::: .:: ::::::: .  
 3' --CCUUACCCUCCCCACCCGUUCU-- 5'

Cs1g11740.1  
 Csi-miR482b

Csi-miR482c, target=Cs9g06846.1 gene=Cs9g06846  
 Category:1  
 Score=2.5  
 Cleavage Site=158

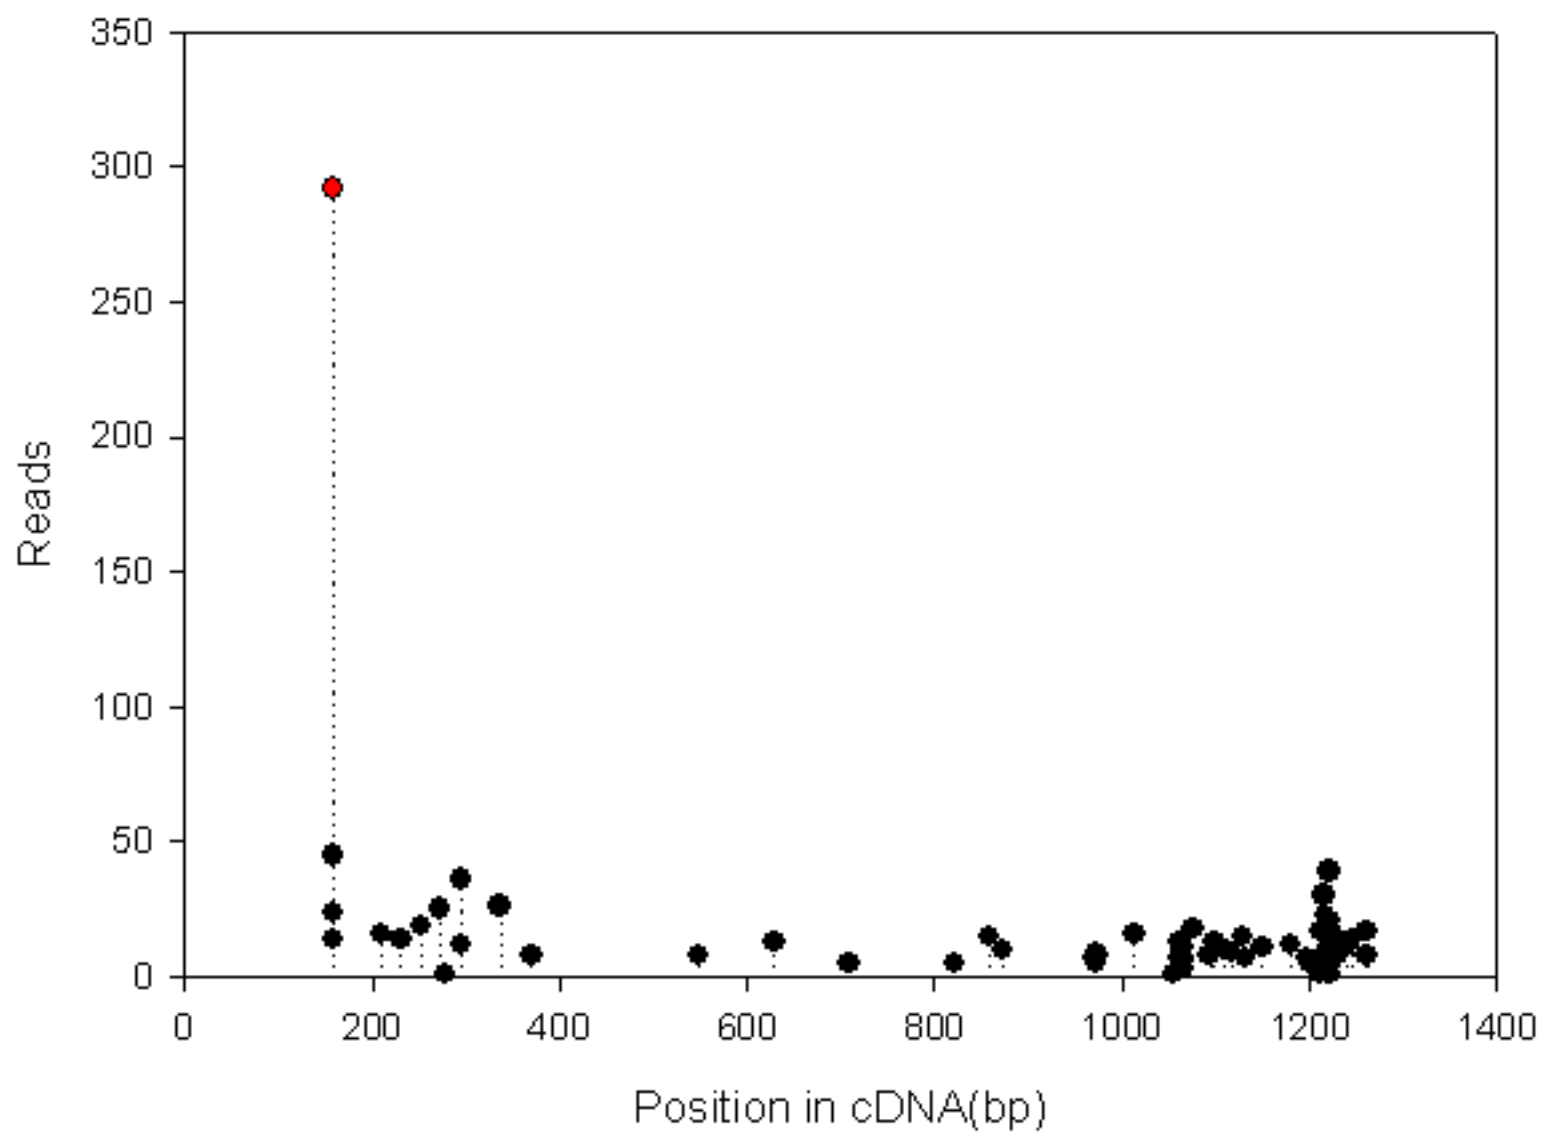

```

5' UGGGAAUAGGUGGACUAGGGAAAUU 3'          Cs9g06846.1
   :.:.:.:.:.:.:.:.:.:.:.:.:.:.:.:.:.
3' AUCCUUAUCCCCCUGAUCCCUU----- 5'      Csi-miR482c
  
```

Csi-miR482d, target=Cs1g11740.1 gene=Cs1g11740  
 Category:1  
 Score=5  
 Cleavage Site=2101

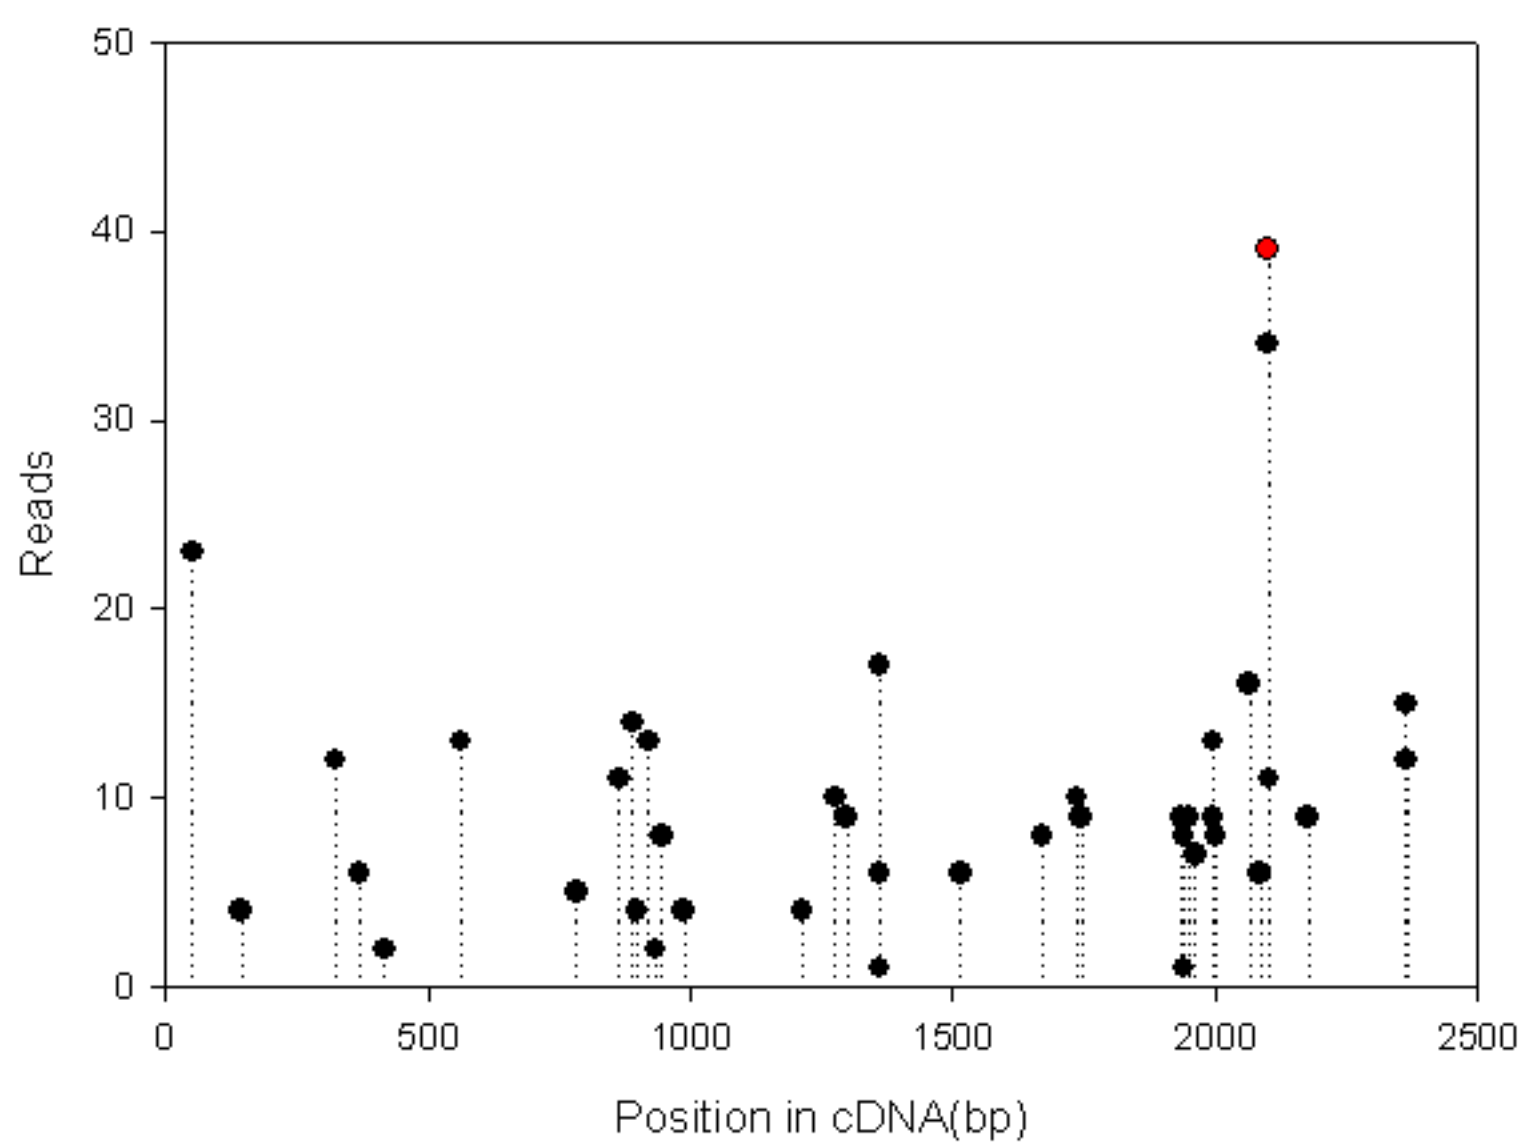

```

5' GCGGCGUGGGGGGAGUGGGCAAGGUU 3'
   :::::::::: :::::::::: ::::
3' --CCGUACCCACCUCAUCCCUUCU-- 5'
  
```

Cs1g11740.1

Csi-miR482d



Csi-miR530b, target=Cs6g11650.1 gene=Cs6g11650  
 Category:3  
 Score=5  
 Cleavage Site=260

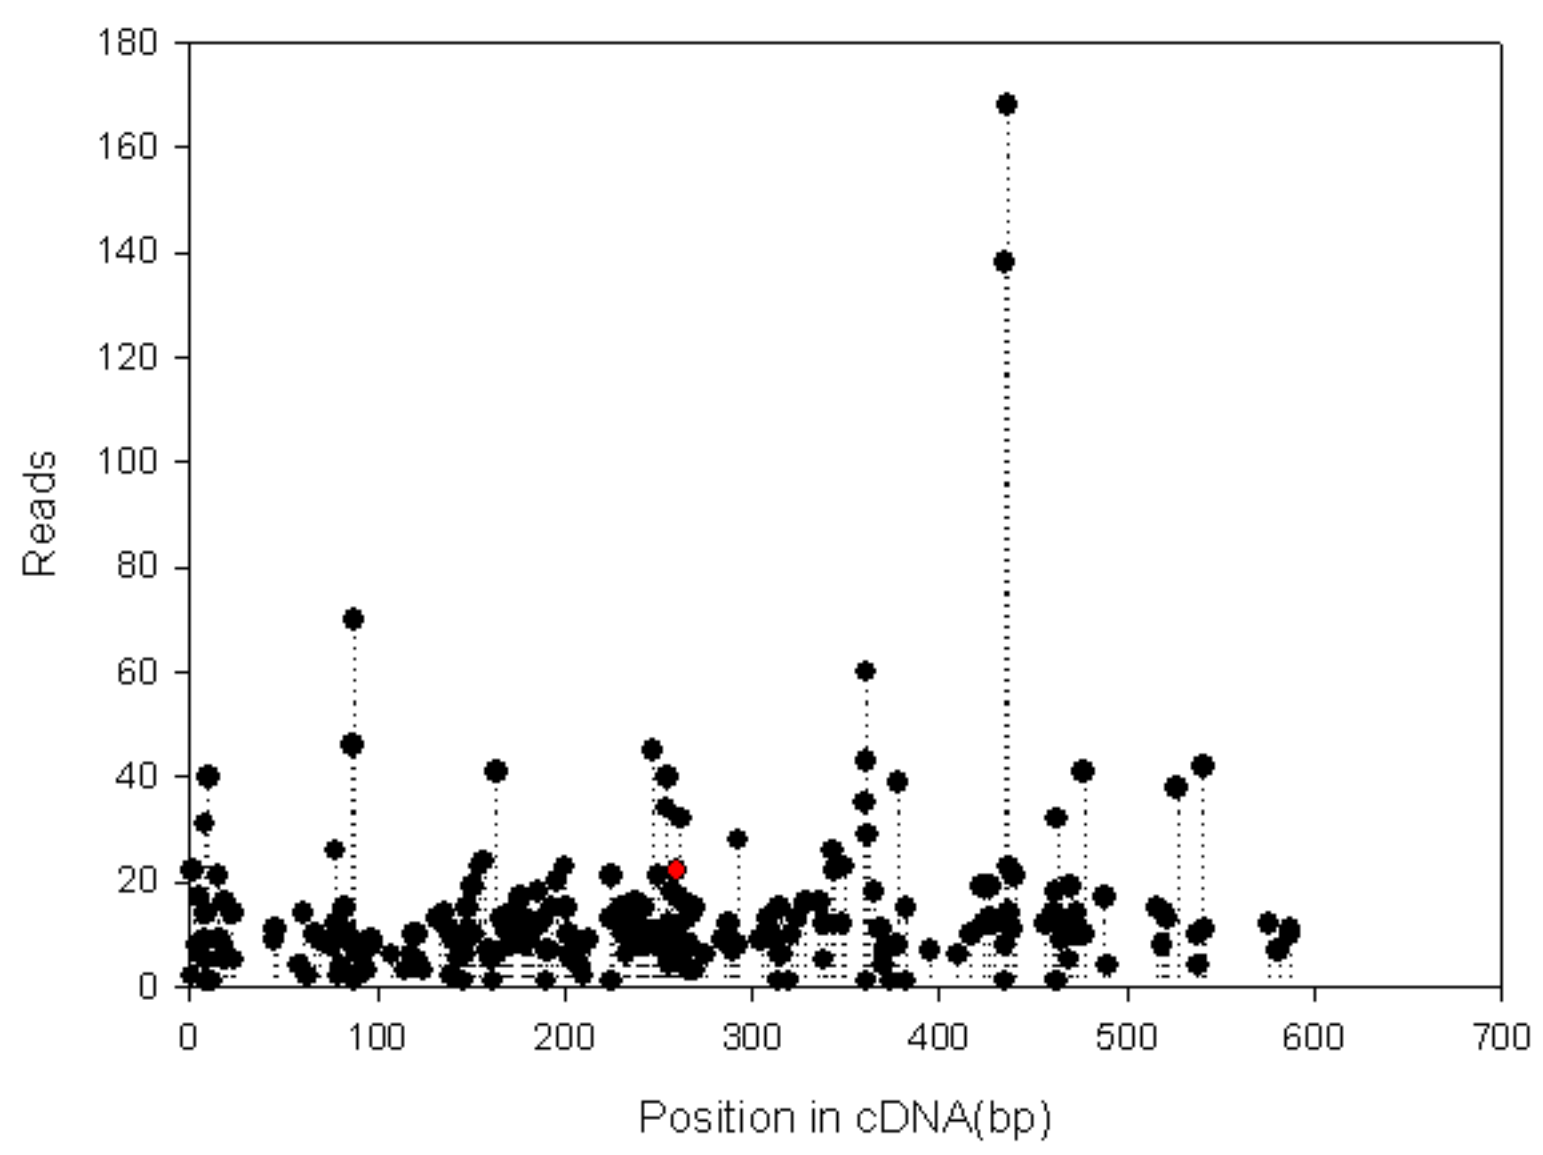

```

5' UGGAGAUUCAGGUGCGAAUGUGAAGA 3'          Cs6g11650.1
   . . . . .
3' -GUUCUACGUCCACGUUUACGU----- 5'      Csi-miR530b
  
```

Csi-miR535.1, target=Cs2g05730.1 gene=Cs2g05730  
 Category:2  
 Score=5  
 Cleavage Site=817

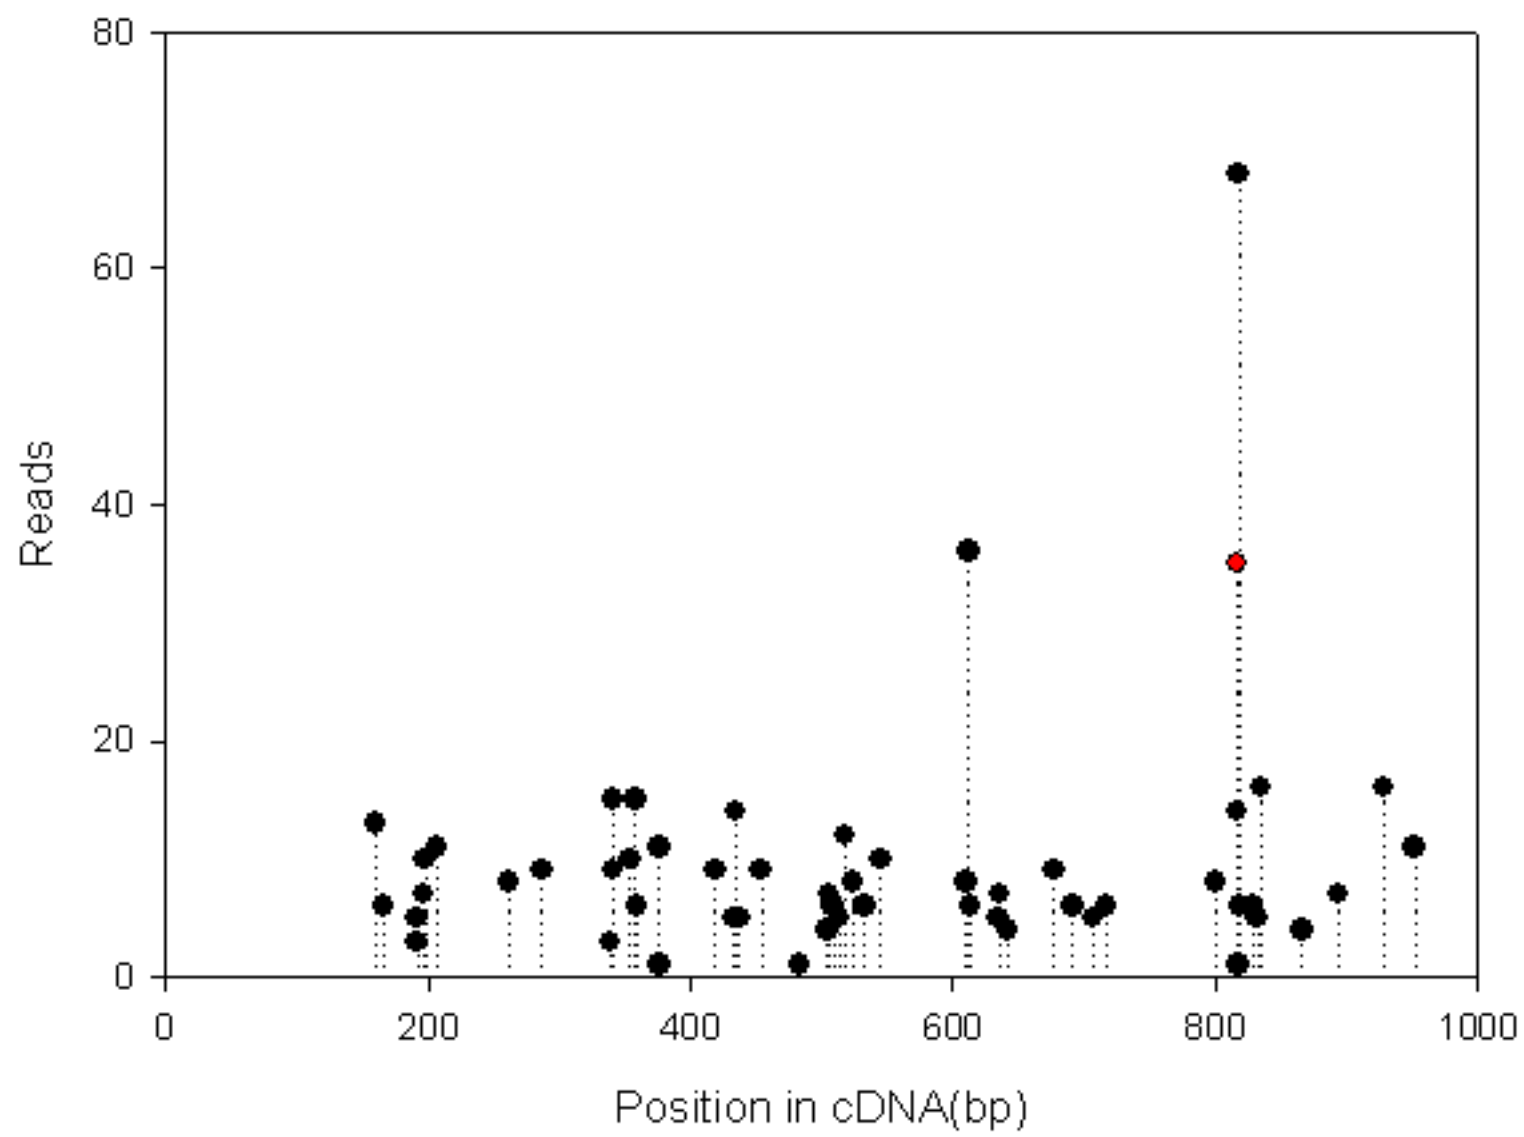

```

5' GCGUGCUCUCUCUCUUCUGUCAAUGC 3'      Cs2g05730.1
   : ::::::::::::::: : ::::::
3' CACACGAGAGAGAGUA-ACAGU----- 5'    Csi-miR535.1
  
```

Csi-miR535.1, target=Cs4g05470.1 gene=Cs4g05470  
 Category:3  
 Score=4  
 Cleavage Site=1460

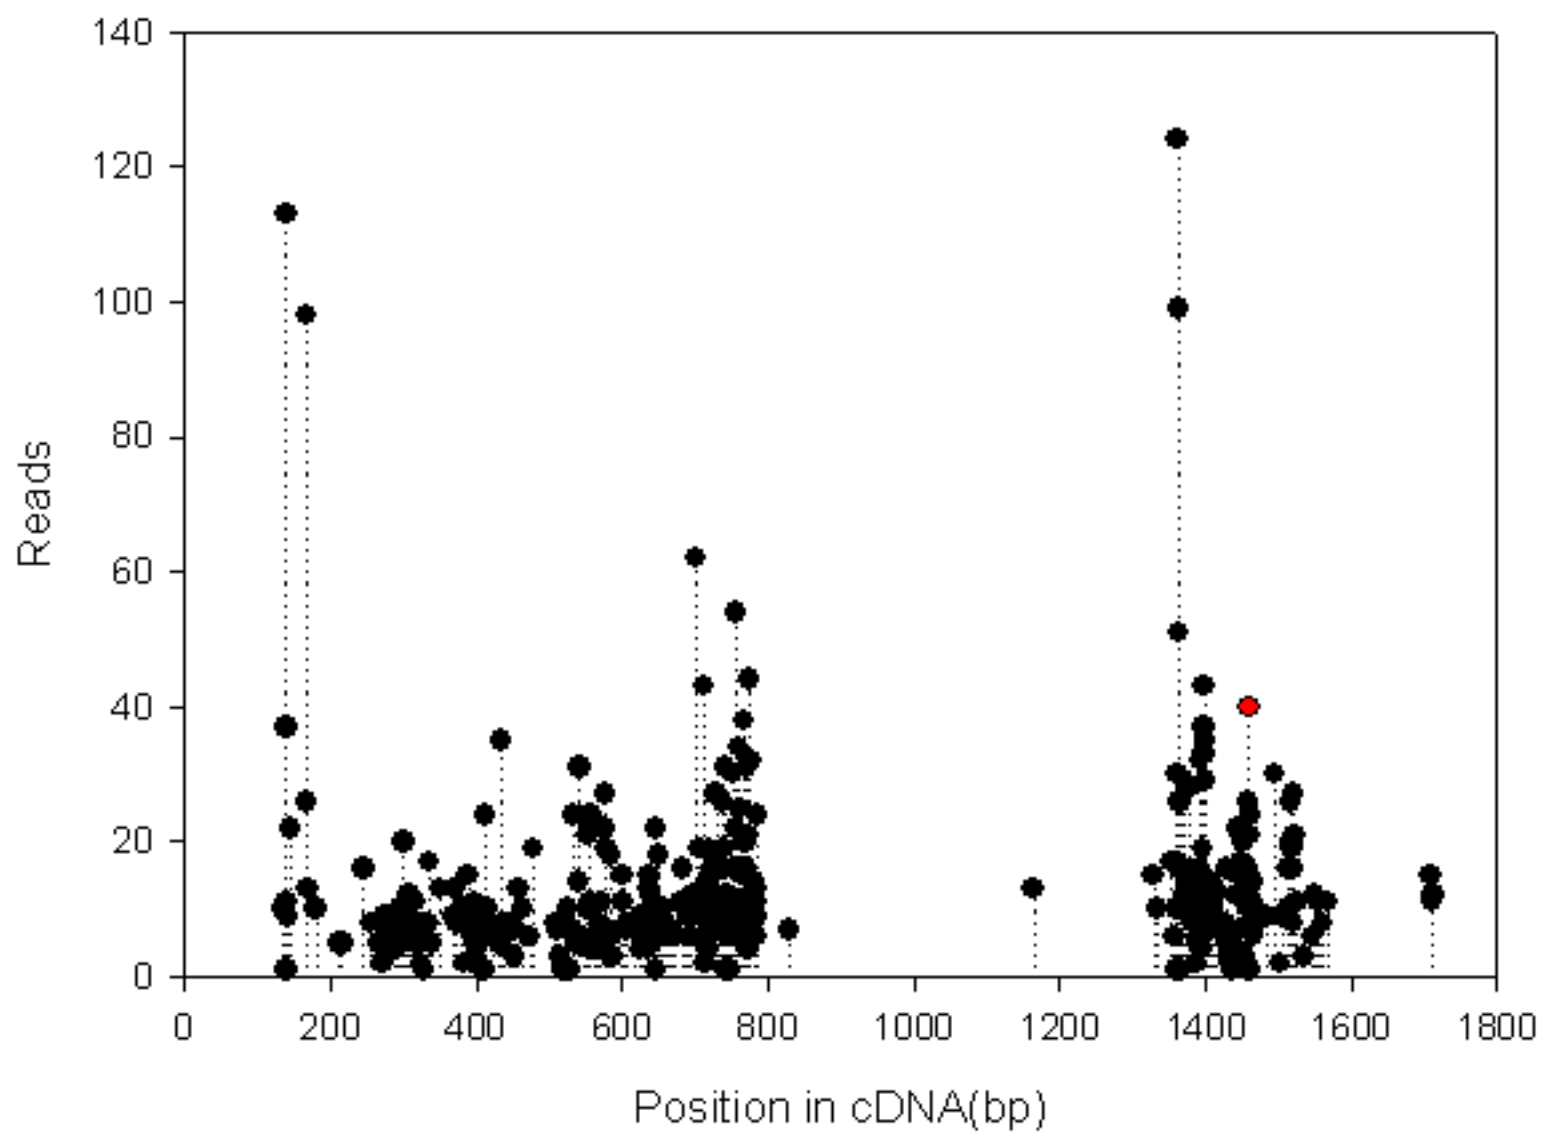

|    |                                     |    |              |
|----|-------------------------------------|----|--------------|
| 5' | CUCUGUG-UUUCUCUCAUUGUUGGGAU         | 3' | Cs4g05470.1  |
|    | : : : : . . : : : : : : : : : . . . |    |              |
| 3' | --CACACGAGAGAGAGUAACAGU----         | 5' | Csi-miR535.1 |

Csi-miR535.1, target=Orange1.1t02265.1 gene=Orange1.1t02265  
 Category:1  
 Score=5  
 Cleavage Site=982



```
5' CUGUGCUCUCUCUCUUCUGUCAAAUC 3'
   :::::::::::::: : :::::
3' CACACGAGAGAGAGUA-ACAGU---- 5'
```

Orange1.1t02265.1

Csi-miR535.1

Csi-miR535.2, target=Cs2g05730.1 gene=Cs2g05730  
 Category:1  
 Score=5  
 Cleavage Site=818



```

5' CGUGCUCUCUCUCUUCUGUCA AUGCU 3'      Cs2g05730.1
   ::::::::::::::: : :::::
3' ACACGAGAGAGAGUA-ACAGU----- 5'      Csi-miR535.2
  
```

Csi-miR535.2, target=Cs4g05470.1 gene=Cs4g05470  
 Category:3  
 Score=3  
 Cleavage Site=1460



```

5' CUCUGUG-UUUCUCUCAUUGUUGGGAU 3'      Cs4g05470.1
   : : : : : : : : : : : : : : : :
3' ---ACACGAGAGAGAGUAACAGU---- 5'      Csi-miR535.2
  
```

Csi-miR535.2, target=Cs7g10830.1 gene=Cs7g10830  
 Category:1  
 Score=5  
 Cleavage Site=1183

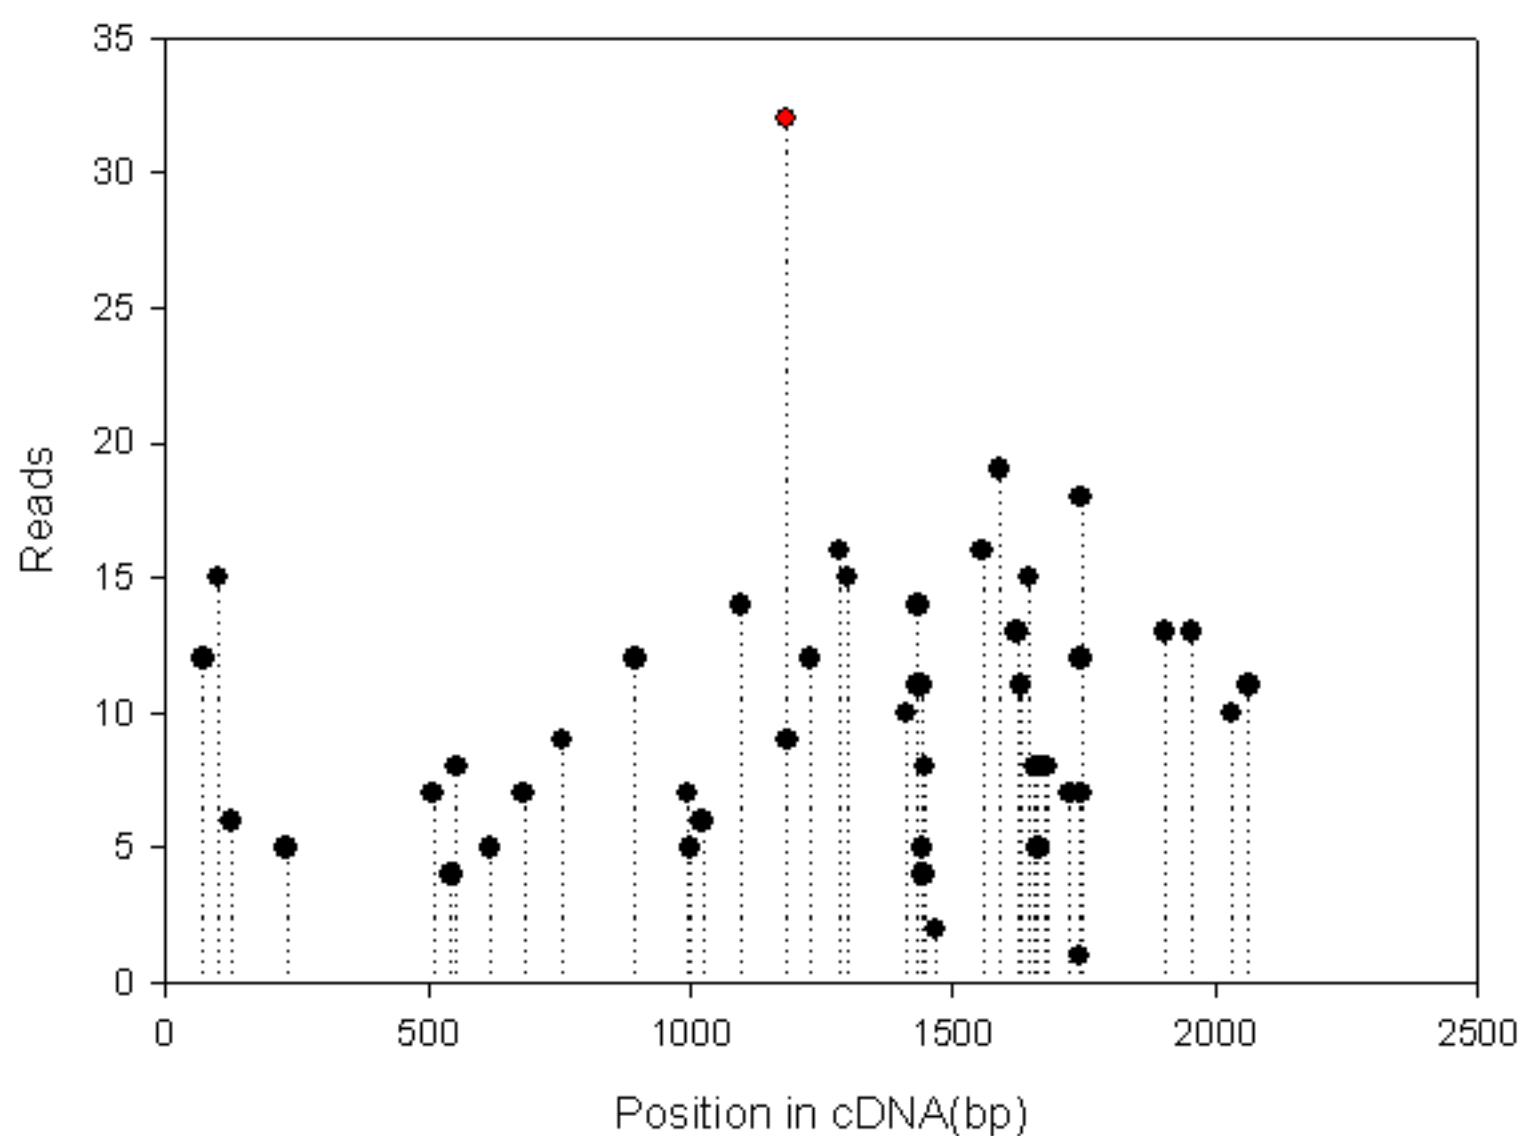

|                                  |              |
|----------------------------------|--------------|
| 5' AGUGCUCUCUCUCUUCUGUCAAAAAC 3' | Cs7g10830.1  |
| :          :                     |              |
| 3' ACACGAGAGAGAGUA-ACAGU----- 5' | Csi-miR535.2 |

Csi-miR535.2, target=Orange1.1t02265.1 gene=Orange1.1t02265  
 Category:1  
 Score=4  
 Cleavage Site=982



```

5' CUGUGCUCUCUCUCUUCUGUCAAAUC 3'      Orange1.1t02265.1
   ::::::::::::::: : :::::
3' -ACACGAGAGAGAGUA-ACAGU----- 5'    Csi-miR535.2

```



Csi-miR536-3p, target=Orange1.1t01470.1 gene=Orange1.1t01470  
 Category:1  
 Score=1.5  
 Cleavage Site=195

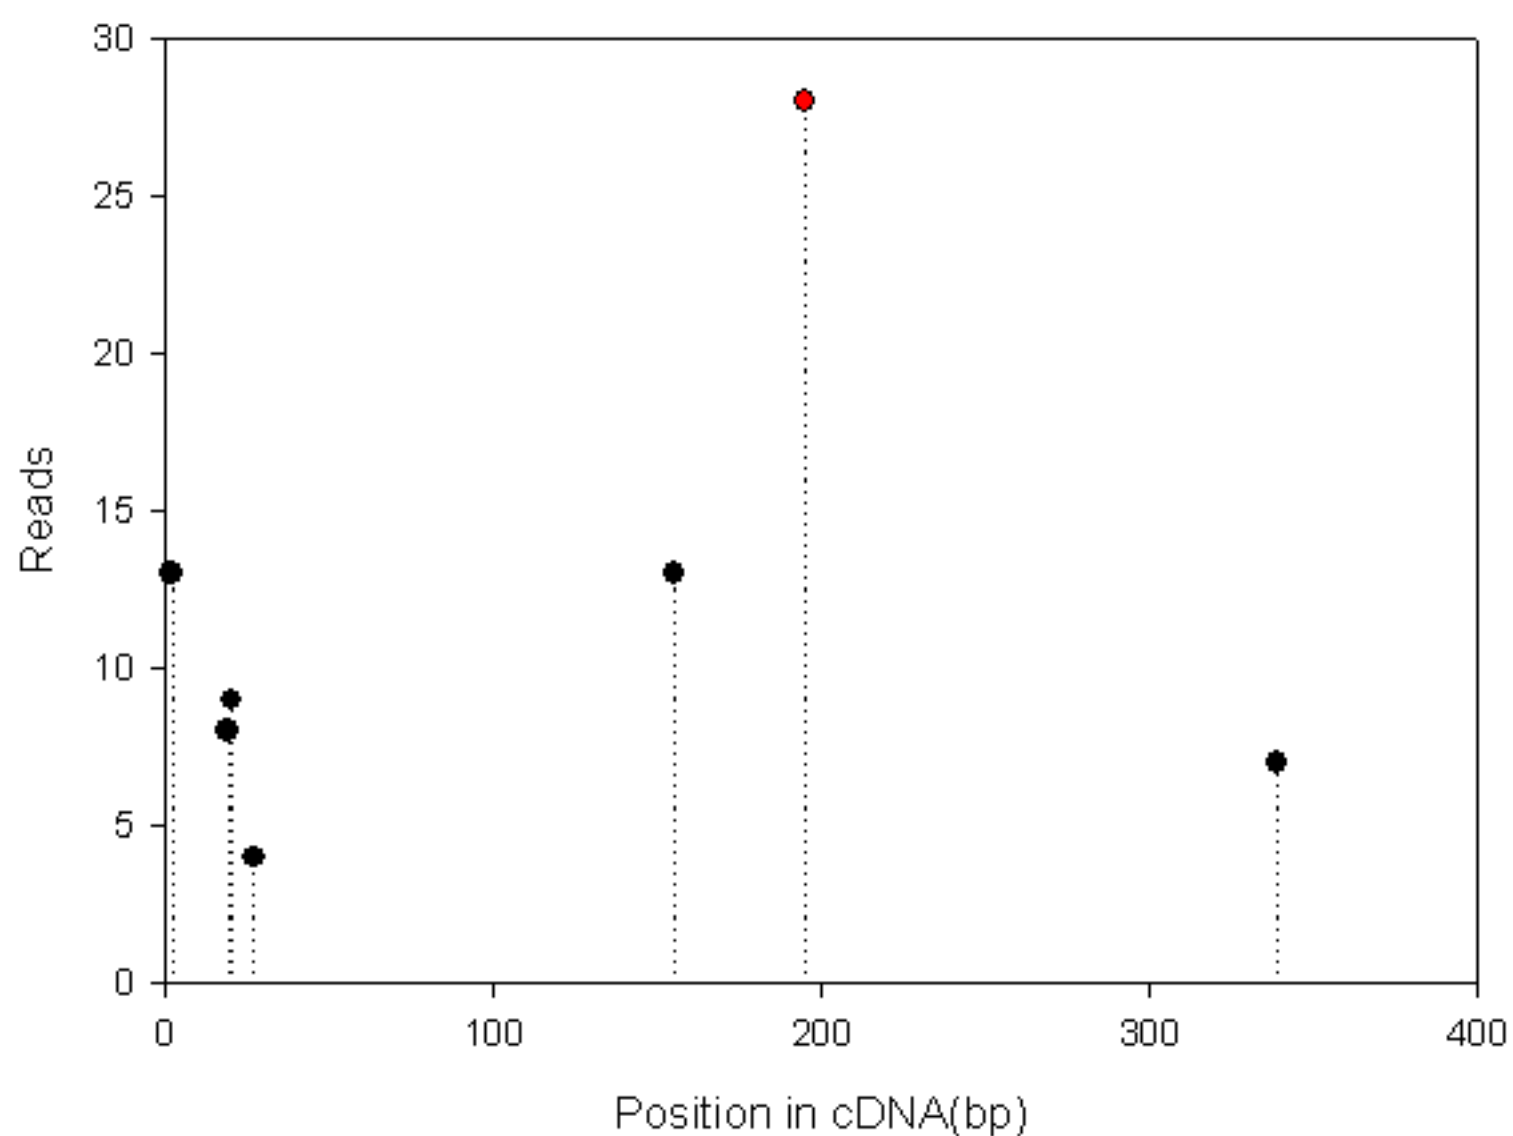

|                                  |                   |
|----------------------------------|-------------------|
| 5' CGACGCACGCAGCGUGGCACUAUCUC 3' | Orange1.1t01470.1 |
| .....                            |                   |
| 3' -CUGCGUGUGUCGCACCGUGGU---- 5' | Csi-miR536-3p     |

Csi-miR536-3p, target=Orange1.1t04955.1 gene=Orange1.1t04955

Category:1

Score=2

Cleavage Site=195

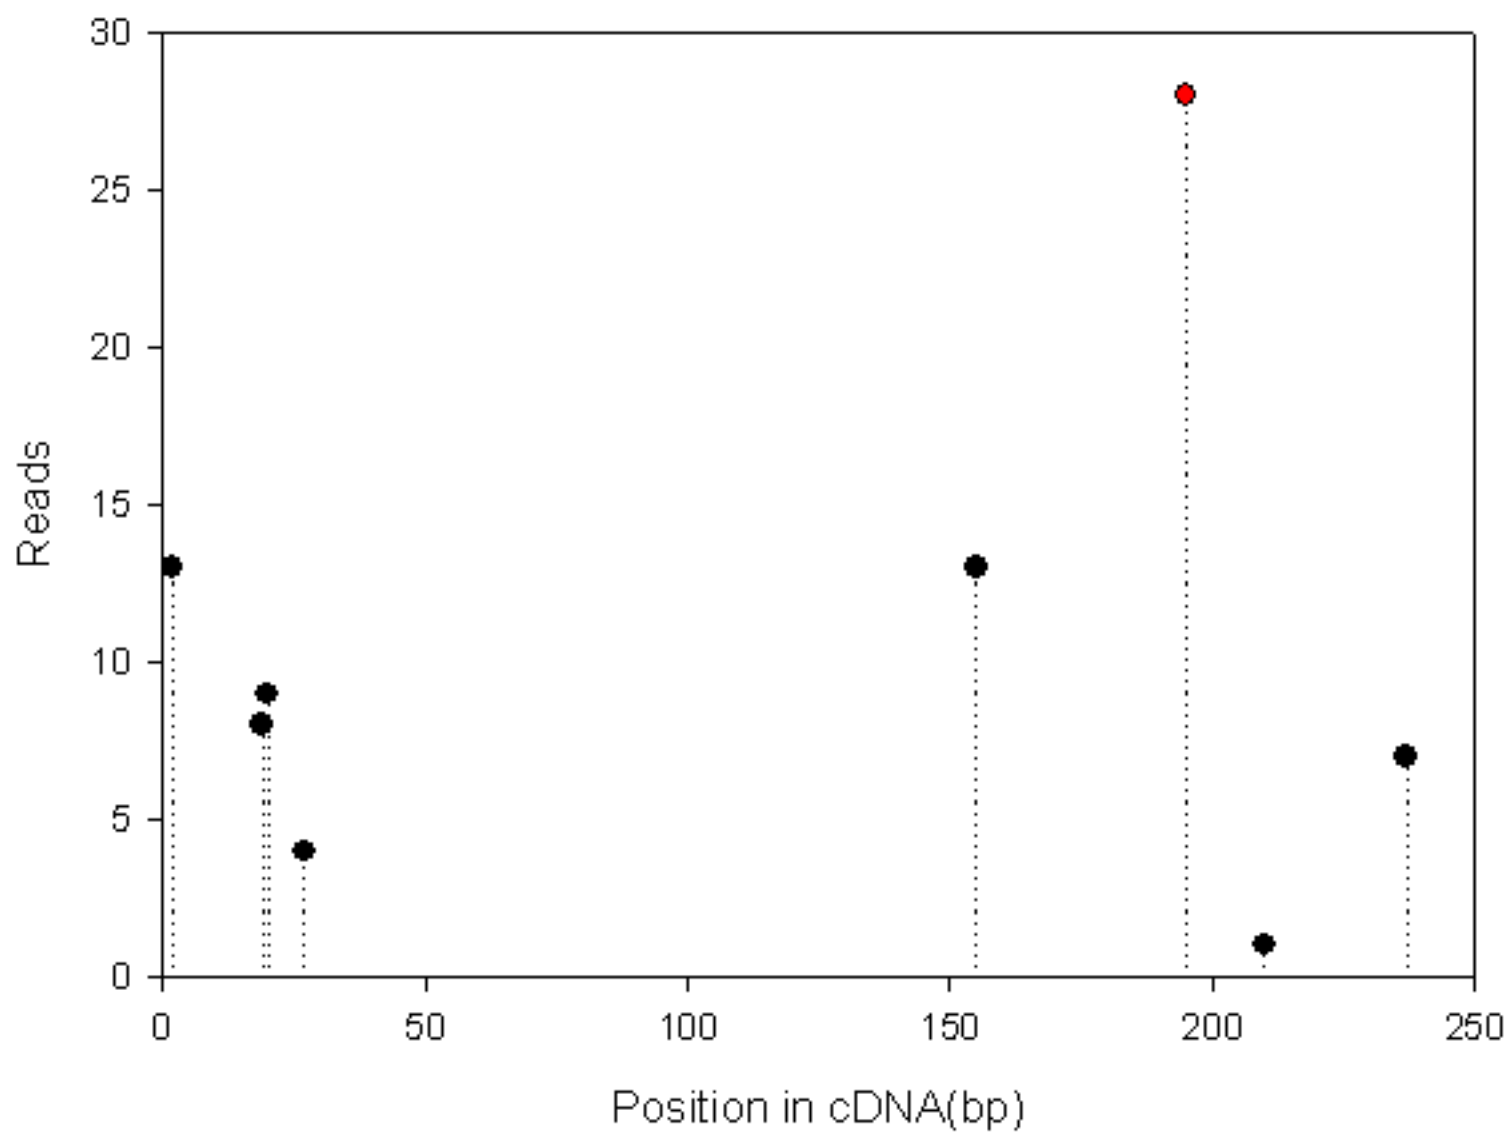

5' CGAUGCACGCAGCGUGGCACUAUCUC 3'

.....

3' -CUGCGUGUGUCGCACCGUGGU---- 5'

Orange1.1t04955.1

Csi-miR536-3p

Csi-miR536-3p, target=Orange1.1t05081.1 gene=Orange1.1t05081  
 Category:1  
 Score=2  
 Cleavage Site=405

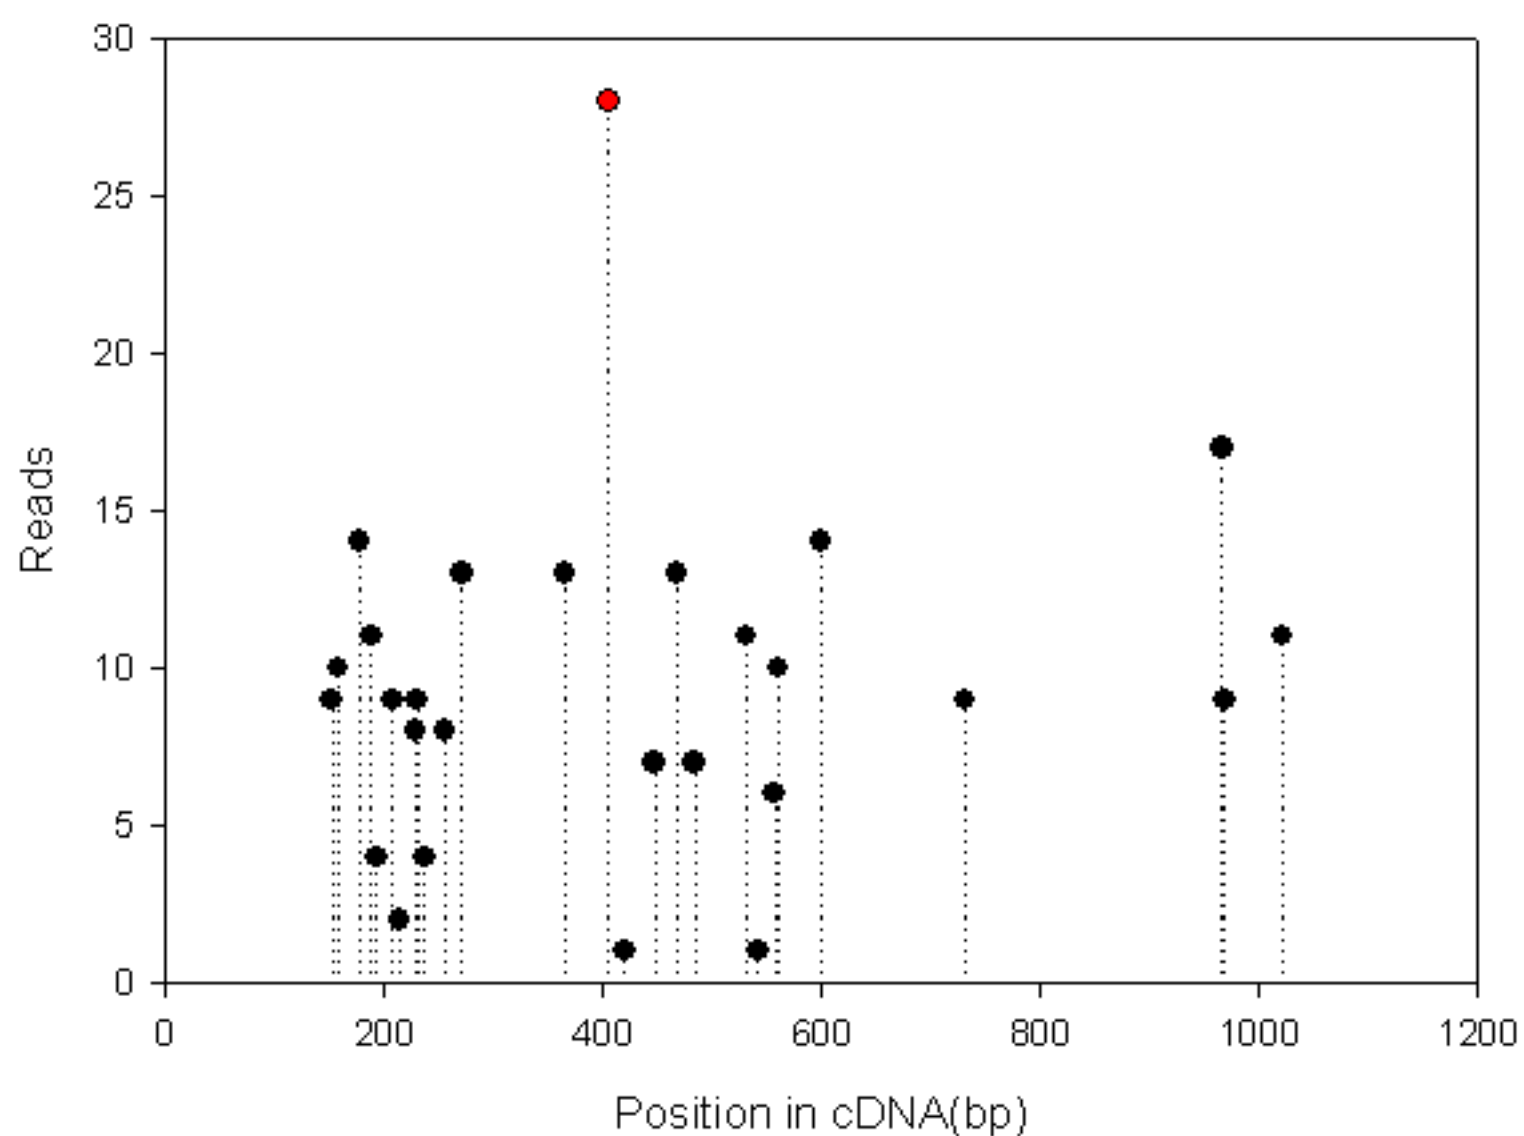

5' CGAUGCACGCAGCGUGGCACUAUCUC 3'  
 :::::::::::::::::::::::::::::  
 3' -CUGCGUGUGUCGCACCGUGGU---- 5'

Orange1.1t05081.1  
 Csi-miR536-3p

Csi-miR827-5p.2, target=Cs4g14890.1 gene=Cs4g14890  
 Category:3  
 Score=4.5  
 Cleavage Site=492

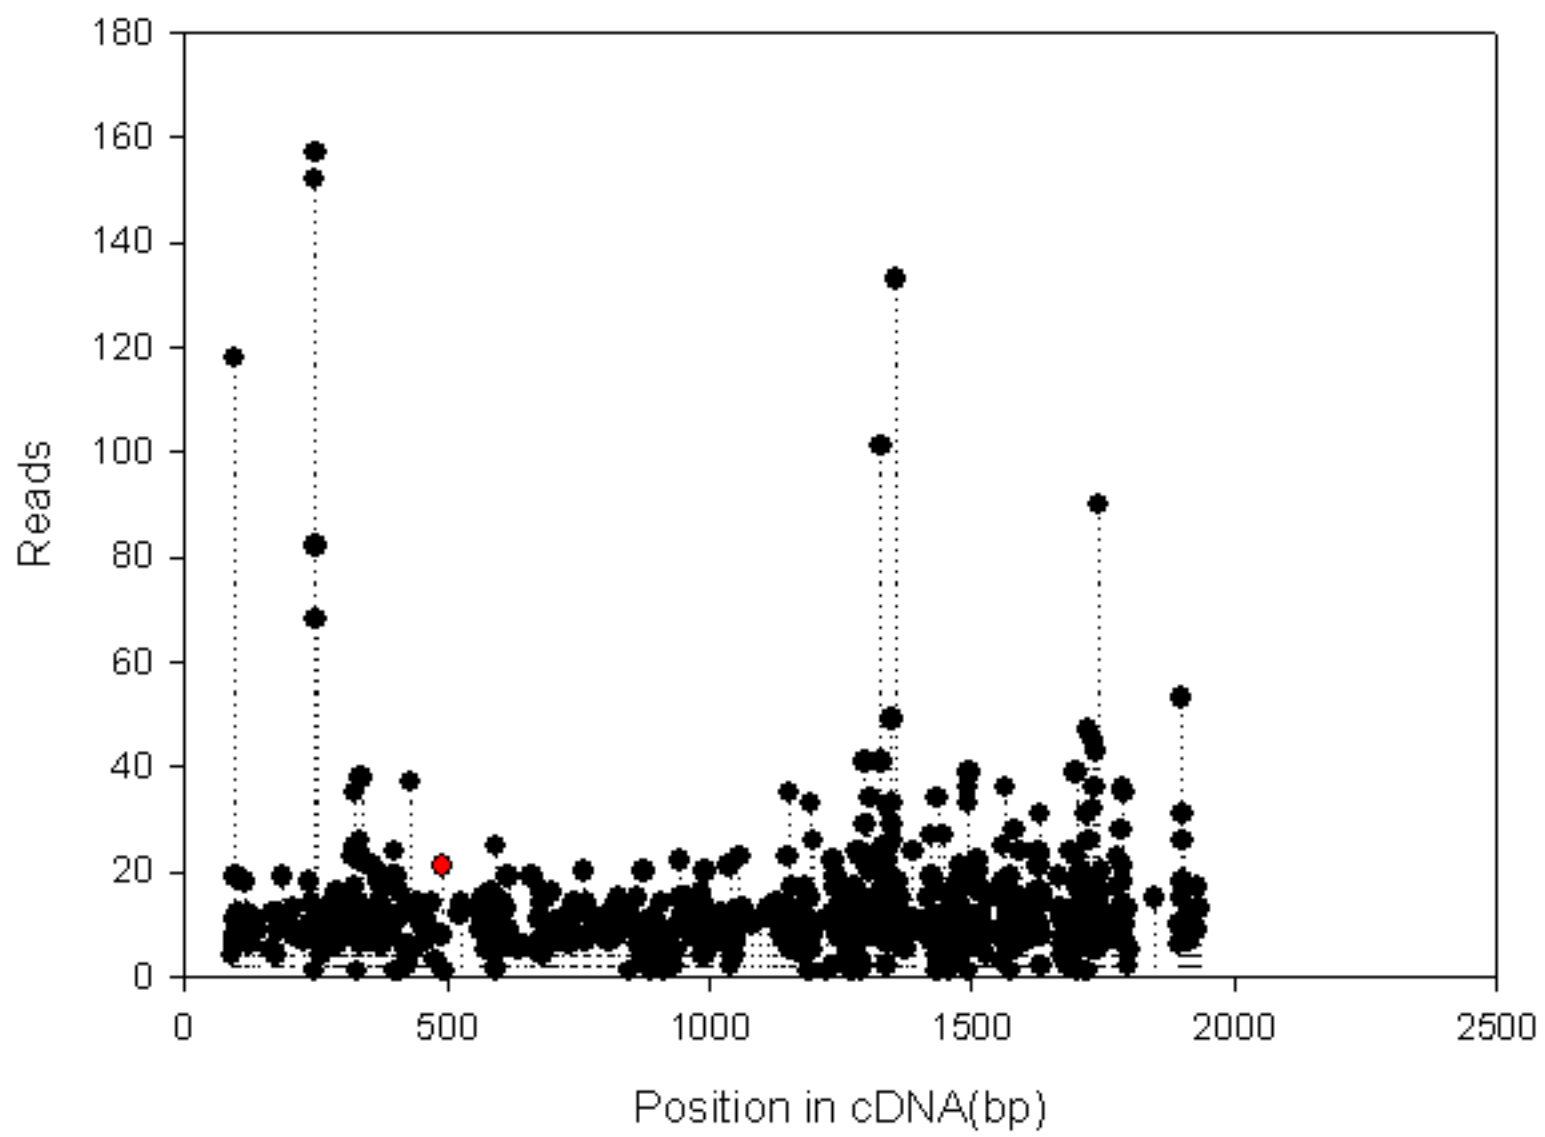

```

5' GUCGAUGACAAUC-ACAAGCGAAAGGA 3'      Cs4g14890.1
   : : : : : : : : : : : : : : : :
3' AAUCUACUGUUAGUUGUUCGU----- 5'      Csi-miR827-5p.2
  
```

Csi-miR833.1, target=Cs8g03110.1 gene=Cs8g03110  
 Category:3  
 Score=4.5  
 Cleavage Site=1324

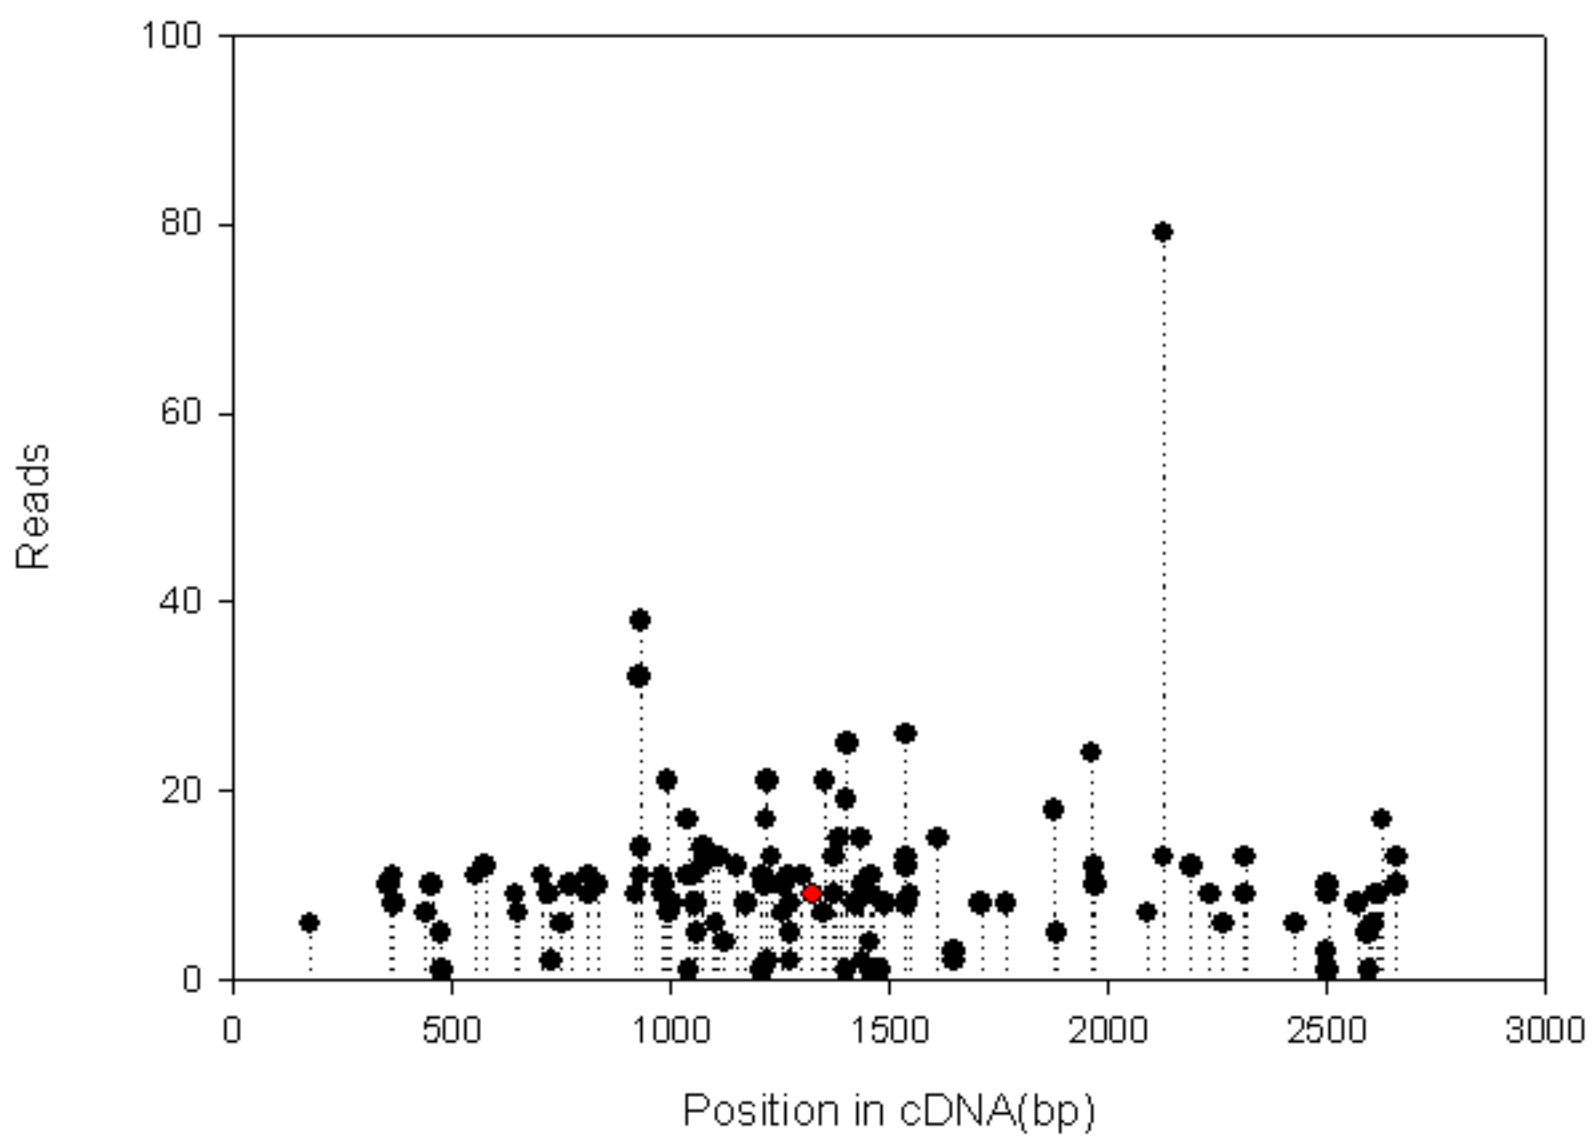

```

5' CUGA-UCAUAUCAGCAAUAGGUCCCCG 3'      Cs8g03110.1
   .:. .:.:.:.:.:.:.:.:.:.:.:.:.
3' -ACUGGGUUAUAGUUGUUAUUUA----- 5'    Csi-miR833.1
  
```

Csi-miRN02, target=Cs1g08400.1 gene=Cs1g08400  
 Category:1  
 Score=2  
 Cleavage Site=333

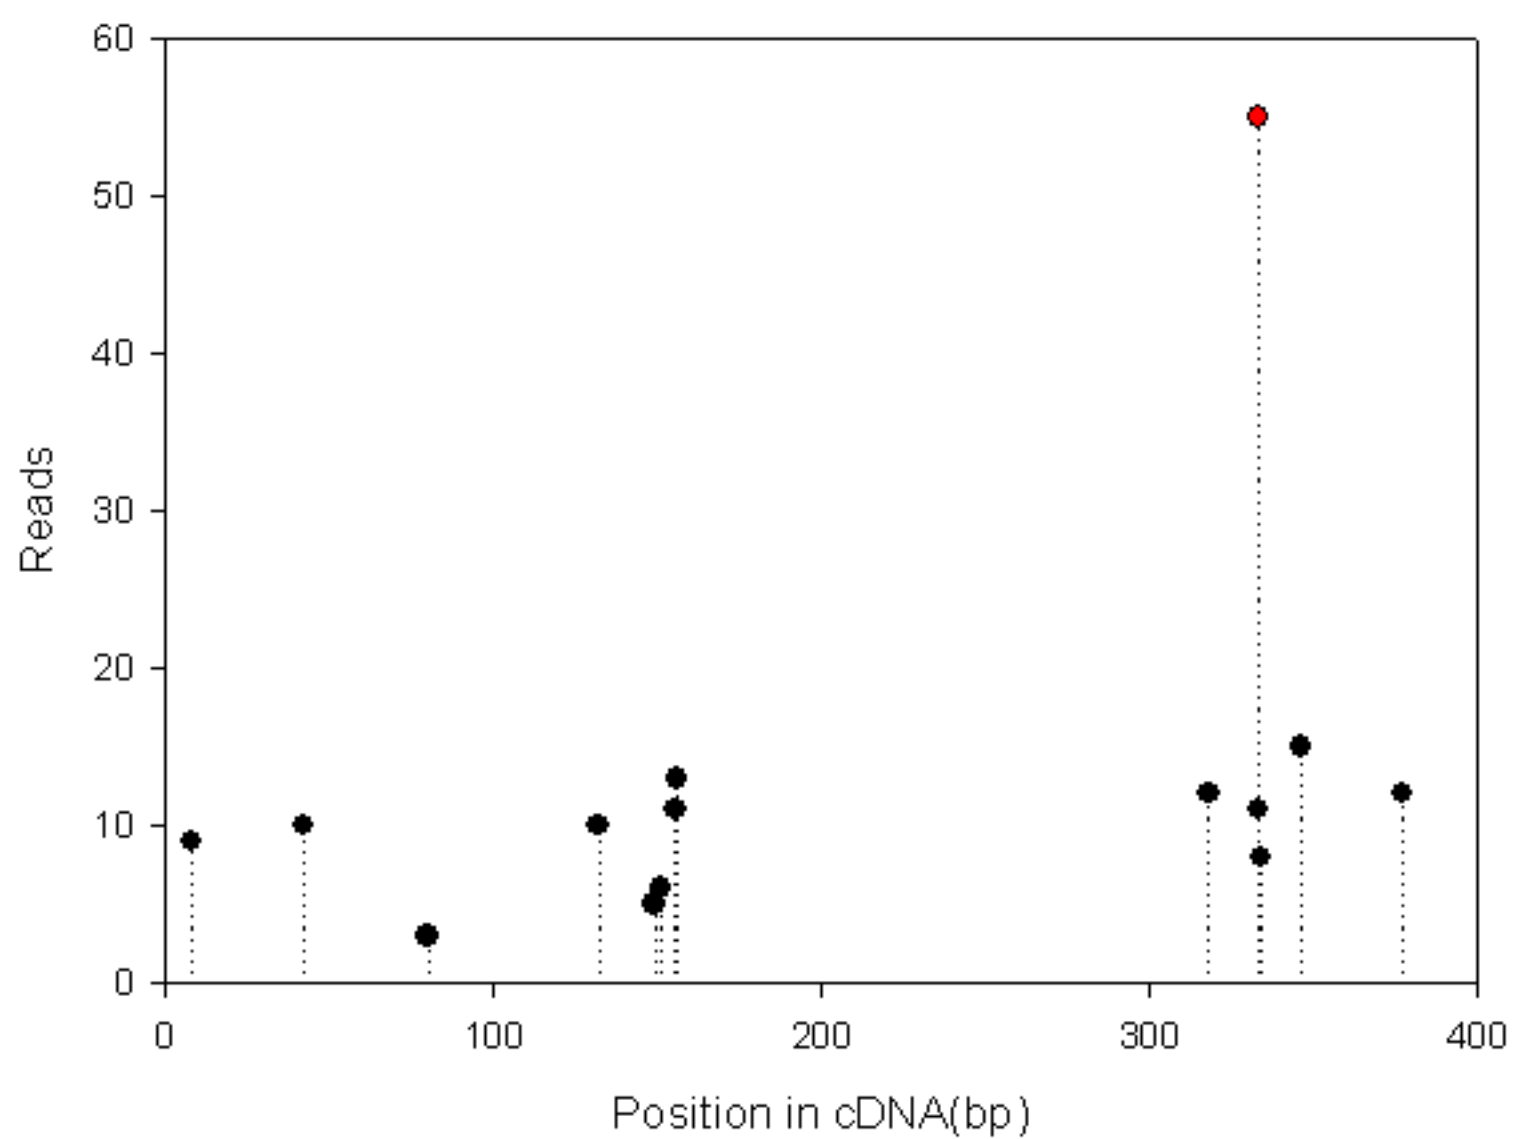

```

5' AACUGUGACACGGUACUAUAGUUGCA 3'      Cs1g08400.1
   : : : : : : : : : : : : : : : :
3' --GACACCGUGCCAUGAUGUCAA--- 5'      Csi-miRN02
  
```

Csi-miRN02, target=Cs3g18790.1 gene=Cs3g18790  
 Category:1  
 Score=2  
 Cleavage Site=1819

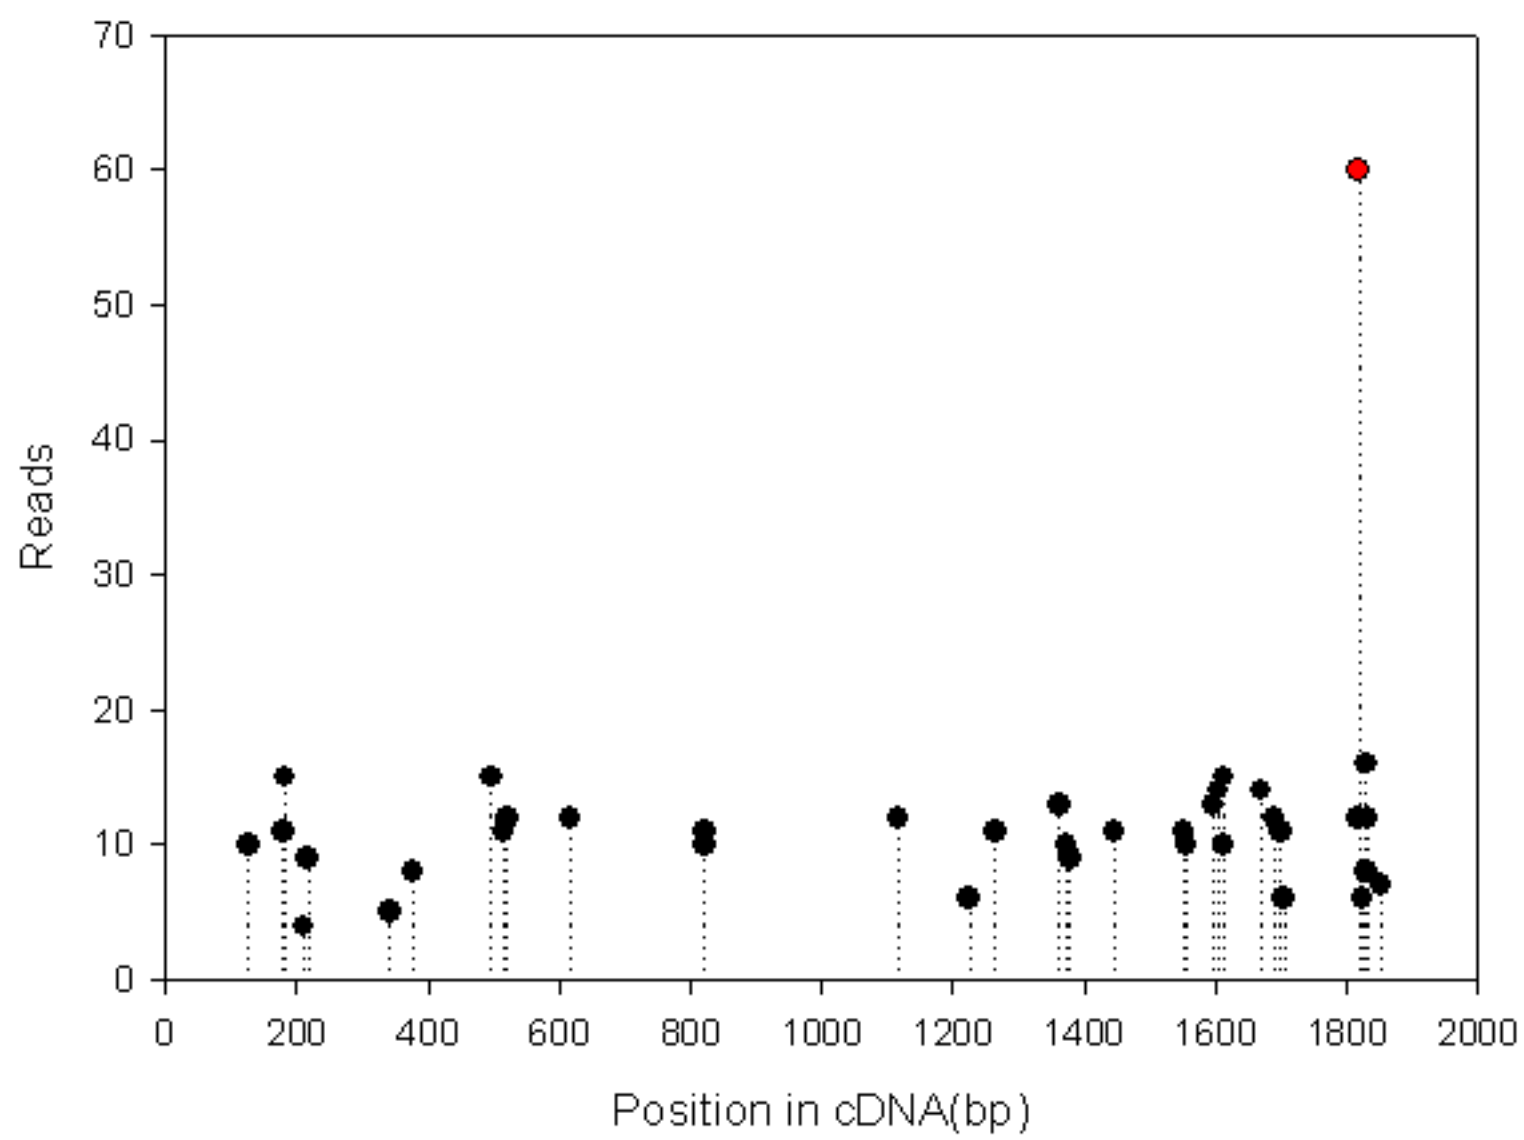

|    |                             |    |             |
|----|-----------------------------|----|-------------|
| 5' | GCAACUGUGGCACGGUACCACAGUUG  | 3' | Cs3g18790.1 |
|    | .....                       |    |             |
| 3' | ----GACACCGUGCCAUGAUGUCAA-- | 5' | Csi-miRN02  |

Csi-miRN02, target=Cs8g12570.1 gene=Cs8g12570  
 Category:1  
 Score=4.5  
 Cleavage Site=3176

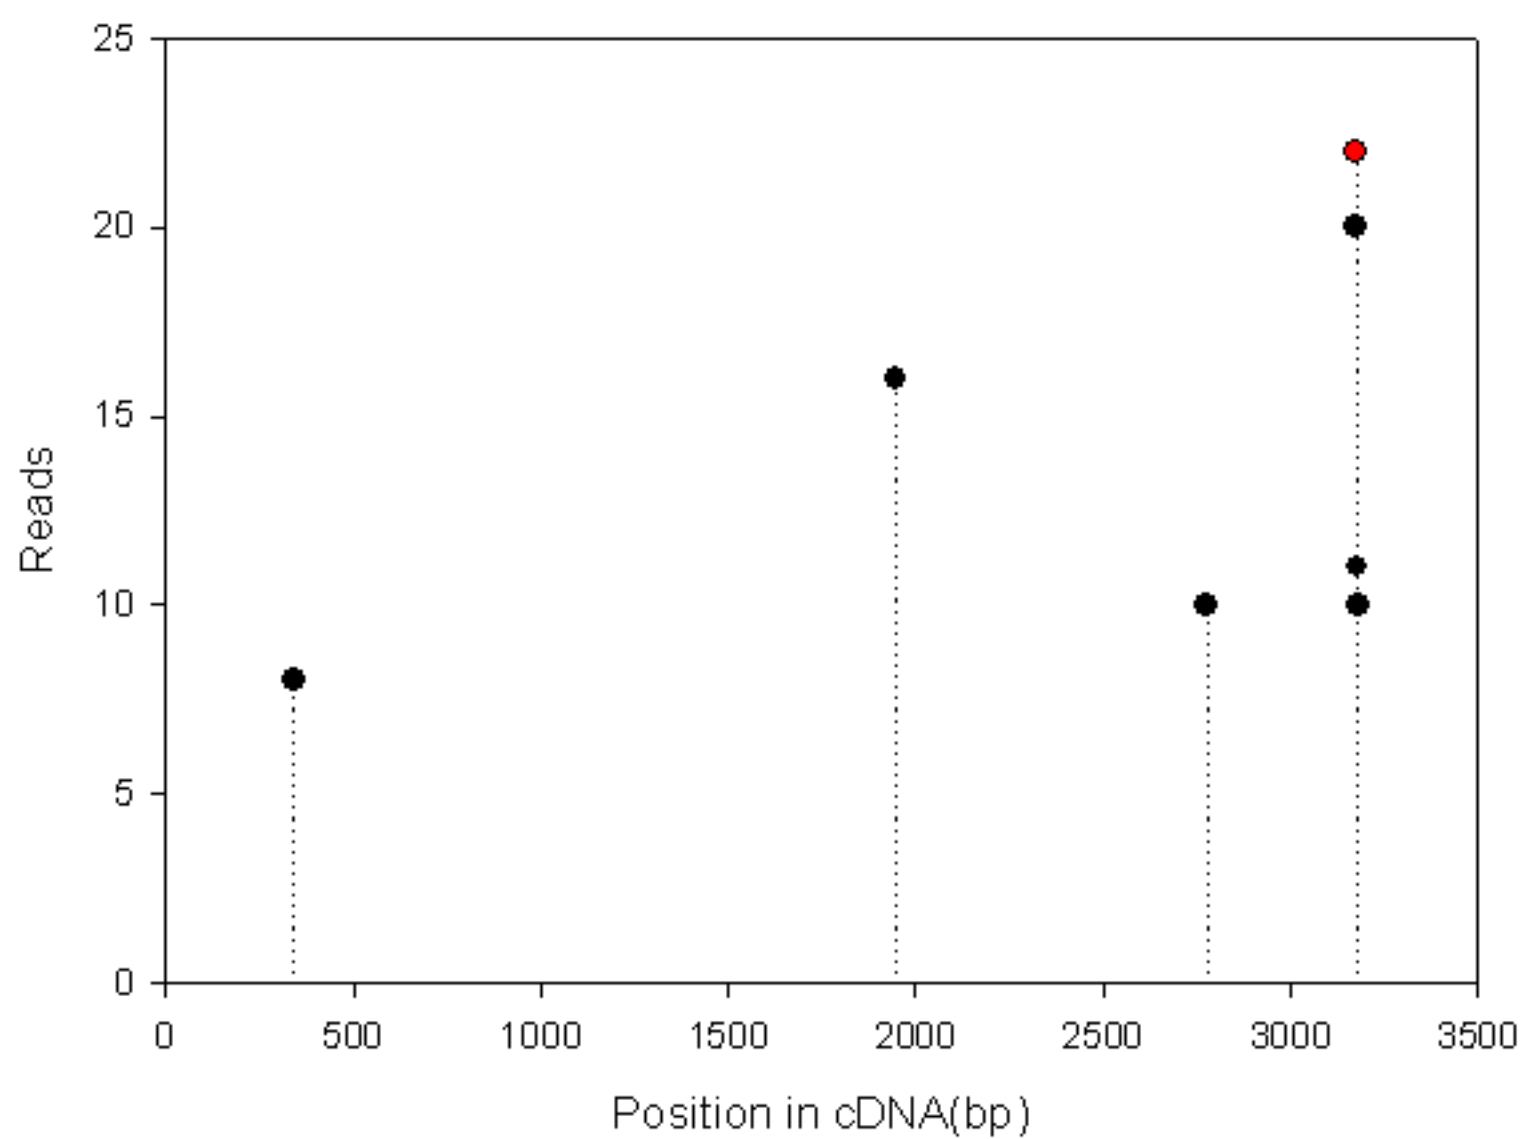

```

5' AACAGUGGUAUGGGUACCACAGUUGCA 3'      Cs8g12570.1
   : :::::..::: ::::
3' --GACACCGUGCCAUGAUGUCA-- 5'      Csi-miRN02
  
```



Csi-miRN02, target=Orange1.1t01714.1 gene=Orange1.1t01714  
 Category:3  
 Score=3.5  
 Cleavage Site=2127

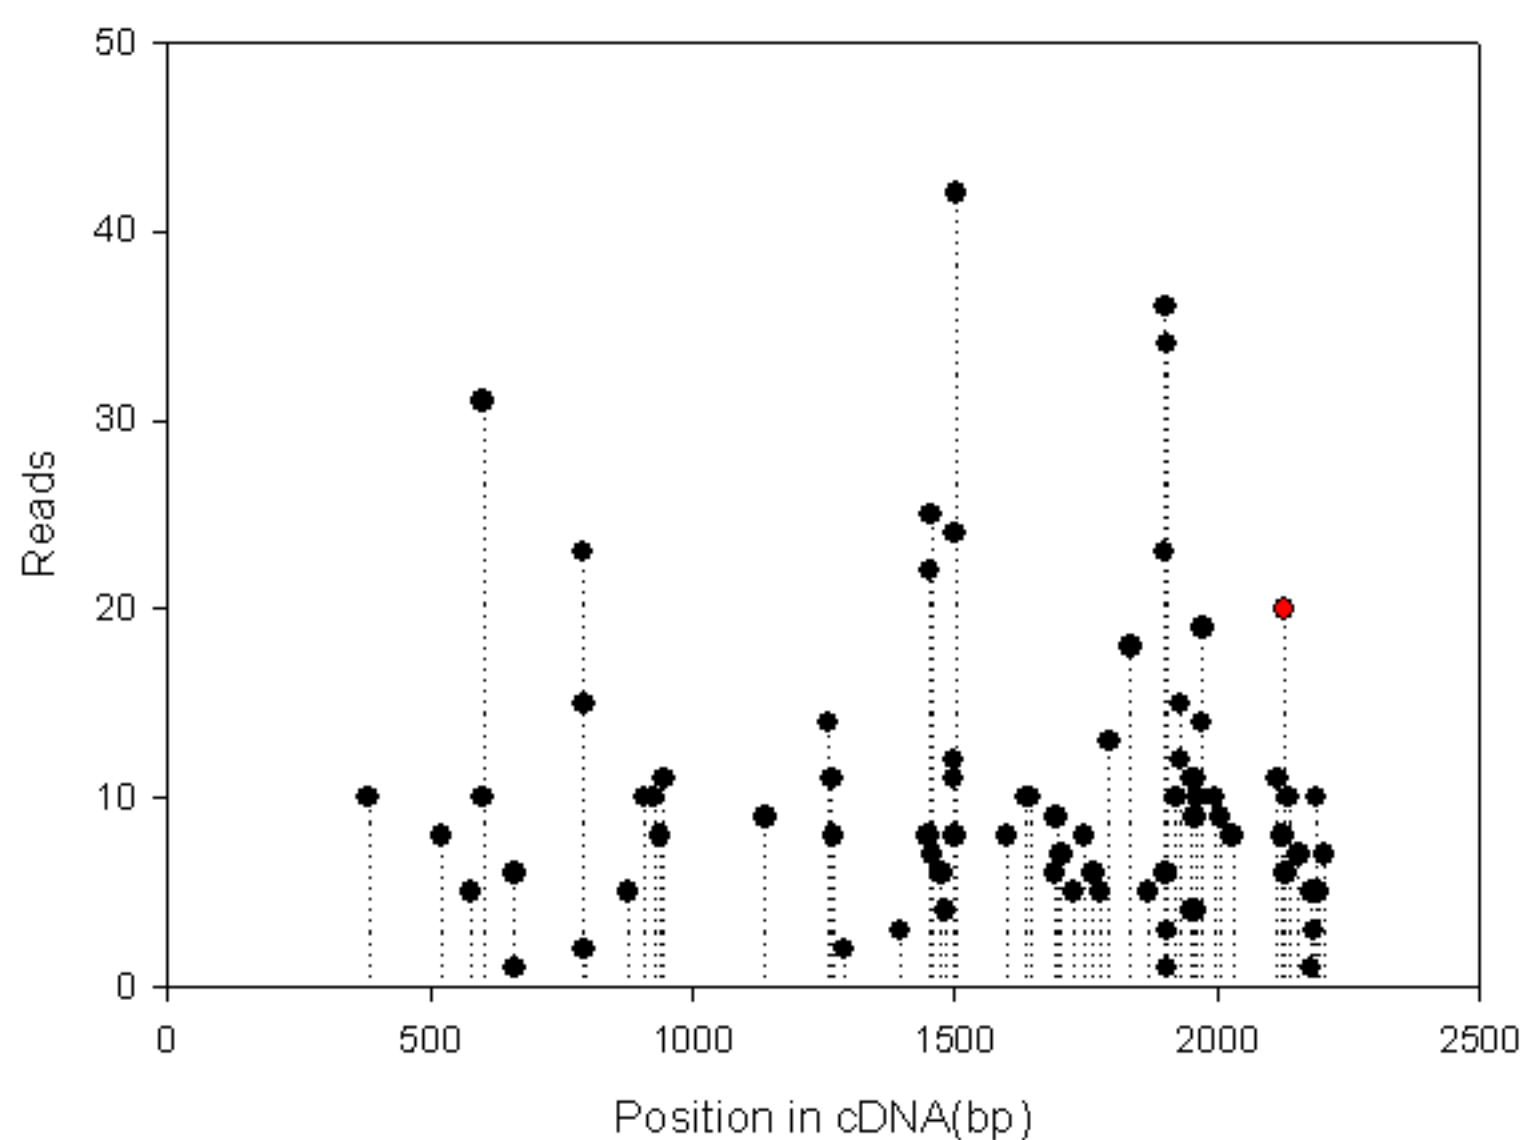

|                                              |                   |
|----------------------------------------------|-------------------|
| 5' AAUUGUGGCACGGUGCCACAGUUGCA 3'             | Orange1.1t01714.1 |
| .: : : : : : : : : : : : : : : .: .: : : : : |                   |
| 3' --GACACCGUGCCAUGAUGUCA-- 5'               | Csi-miRN02        |

Csi-miRN05, target=Cs4g19940.1 gene=Cs4g19940  
 Category:2  
 Score=3.5  
 Cleavage Site=3042

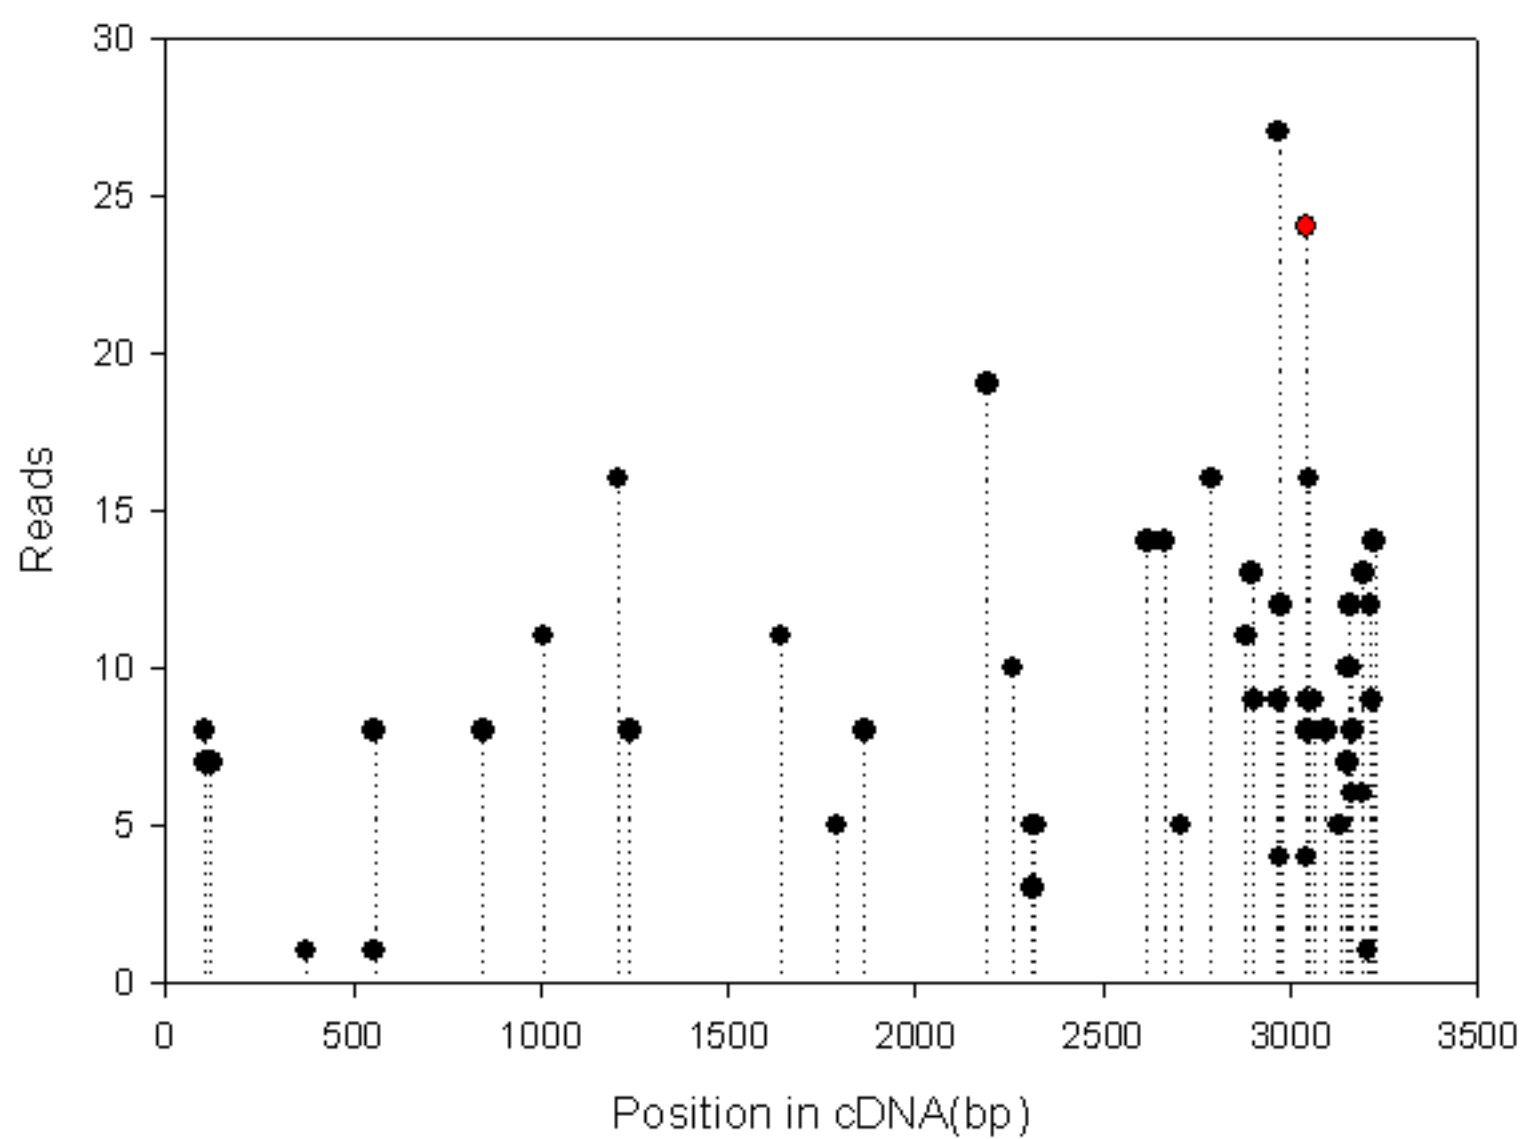

```

5' AGCUAGGAAUGUAUCUUACAUAUUAU 3'      Cs4g19940.1
   : :.:.:.:.:.:.:.:.:.:.:.:.:.:
3' ACUCUCUUUACAUAAGAAUGUA----- 5'    Csi-miRN05
  
```

Csi-miRN07, target=Cs8g09620.1 gene=Cs8g09620  
 Category:3  
 Score=4  
 Cleavage Site=353

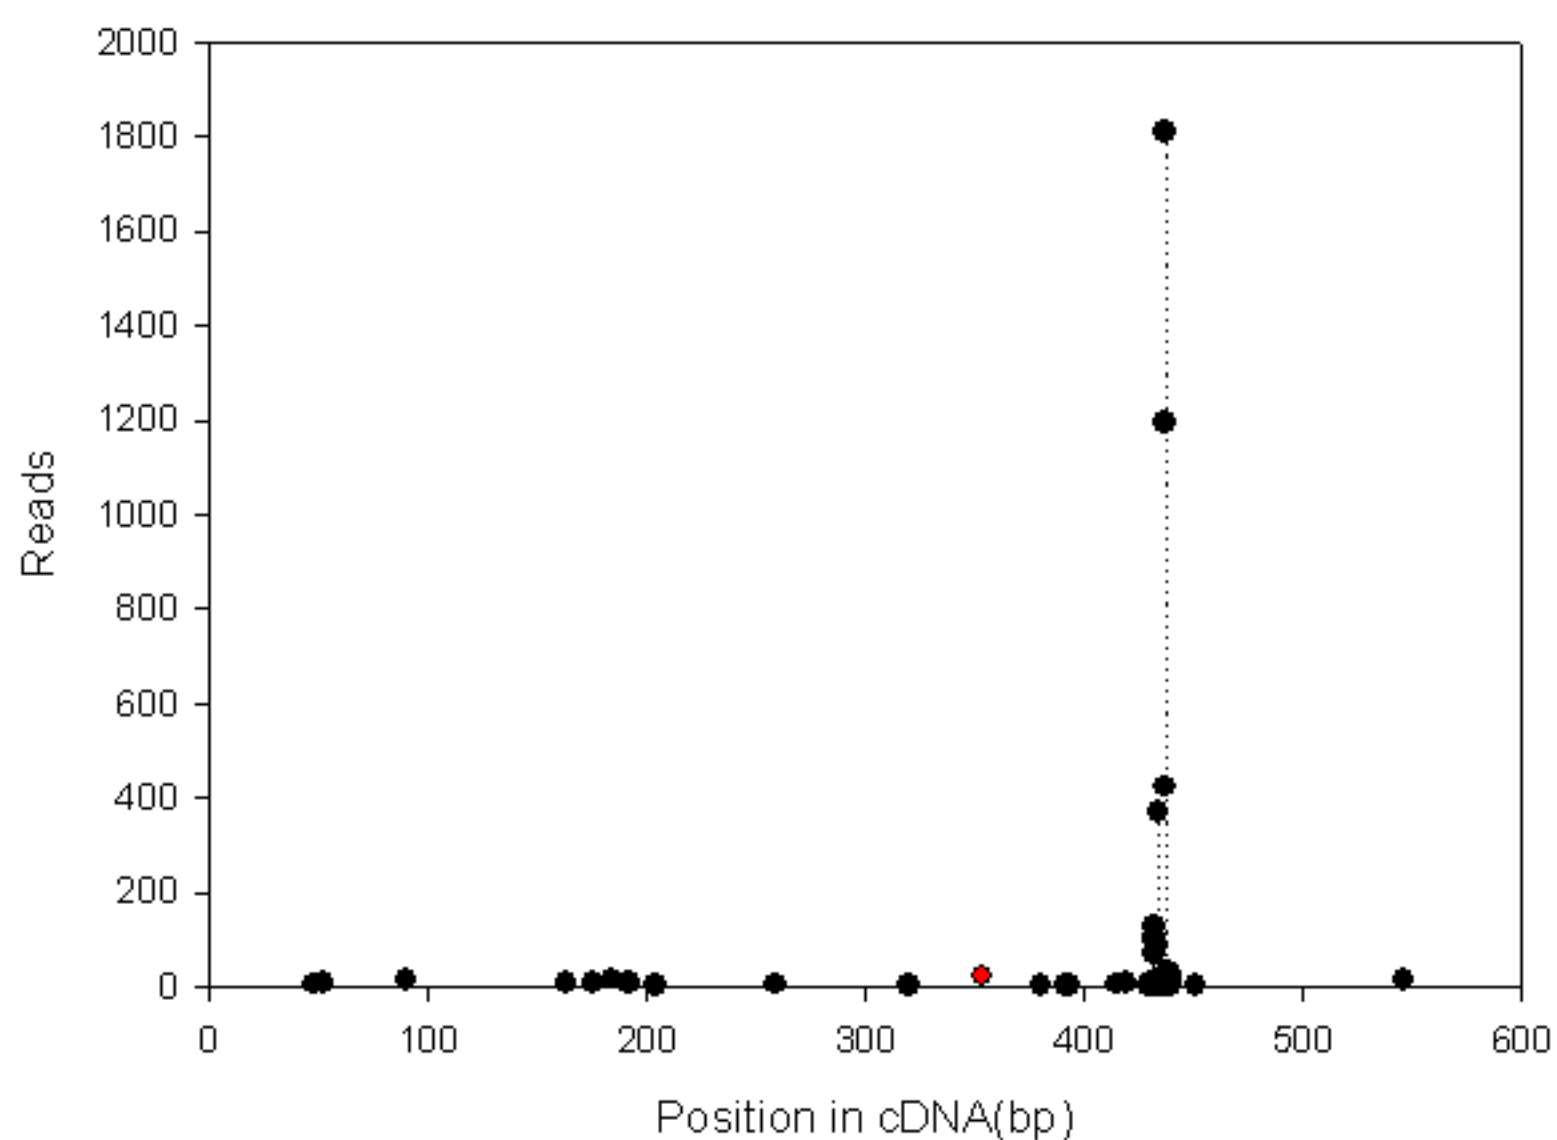

```

5' UCCGACACCGUUUCAUCUUGUCCUCC 3'      Cs8g09620.1
      :::::::::: :::::::::: ::
3' -----GUGGCAAACUAGAACAGAAGG 5'      Csi-miRN07
  
```

Csi-miRN11, target=Cs8g13560.1 gene=Cs8g13560  
 Category:1  
 score=2  
 Cleavage Site=302

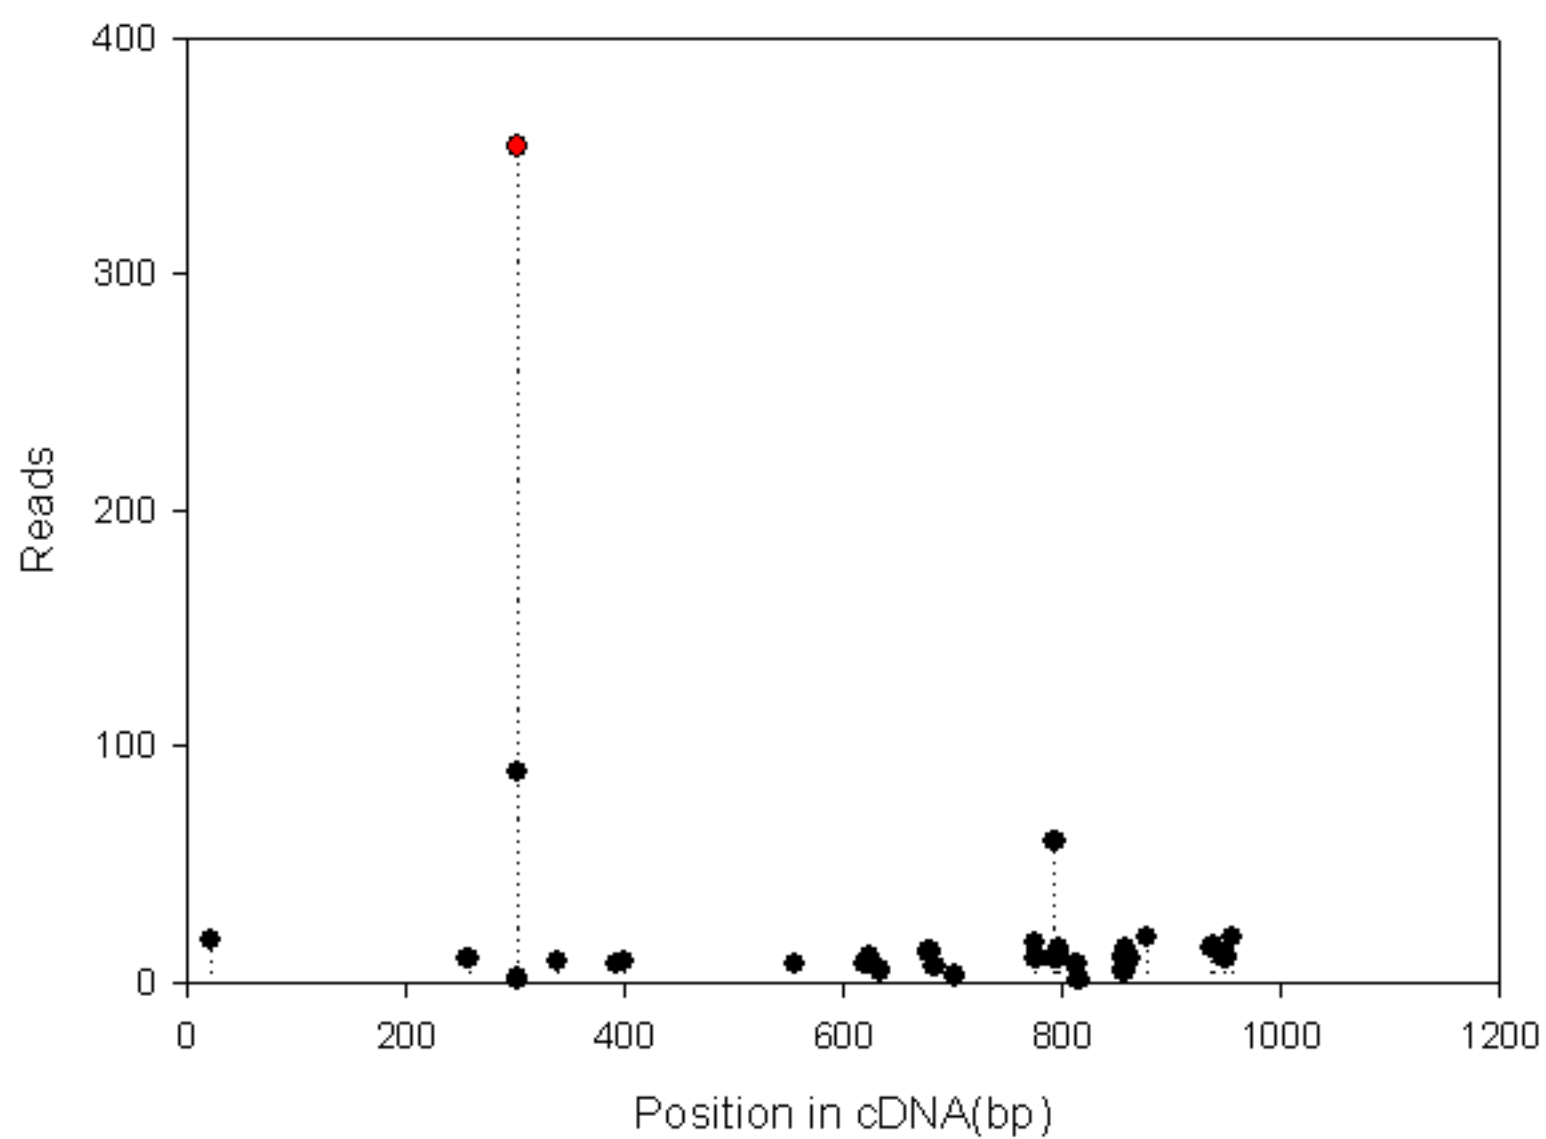

```

5' GUACCGUAAAAGCUCUGCGACAUG 3'      Cs8g13560.1
   : : : : : : : : : : : : : : : :
3' -UUGGCAUCUUUCGAGGACGCU---- 5'    Csi-miRN11
  
```

Csi-miRN12, target=Cs4g06030.1 gene=Cs4g06030  
 Category:3  
 Score=5  
 Cleavage Site=2072

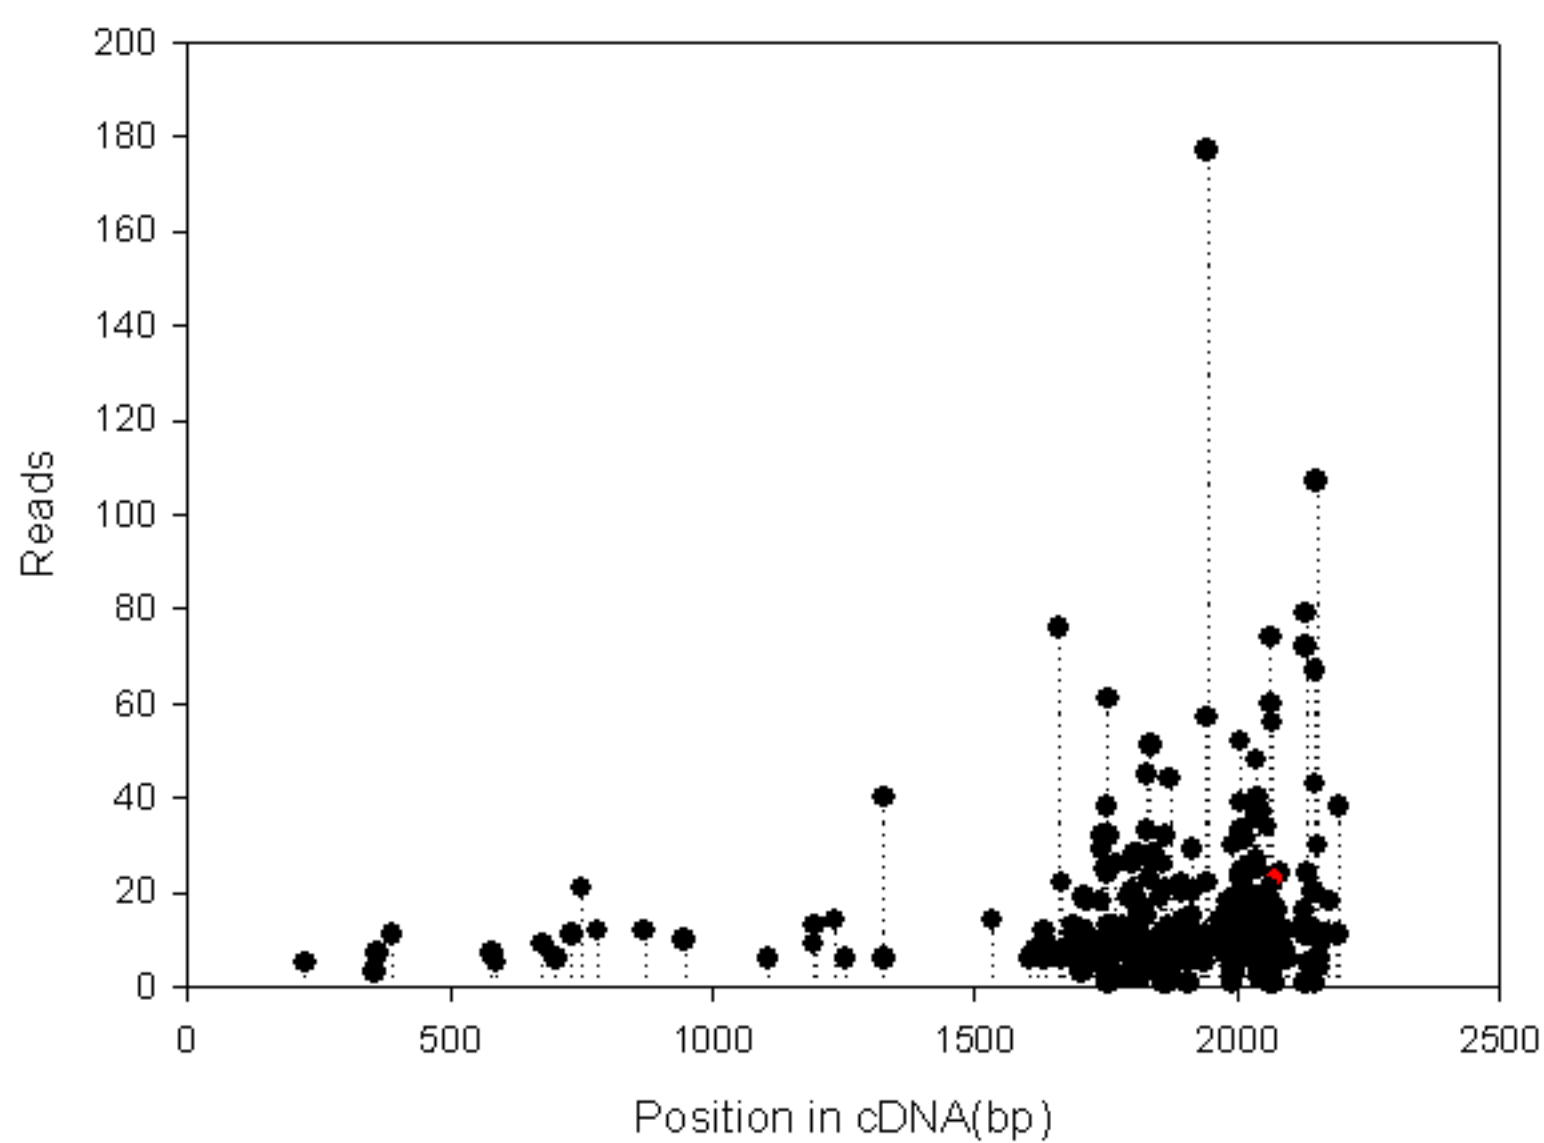

```

5' GAGCUCAGUGGCAUAGCCAUUGAAAC 3'      Cs4g06030.1
   :: :::: ::::: :::::
3' --AGAAUCACGGUAUUGGUAACU--- 5'      Csi-miRN12

```

Csi-miRN20, target=Cs3g05320.1 gene=Cs3g05320  
 Category:1  
 Score=0  
 Cleavage Site=451

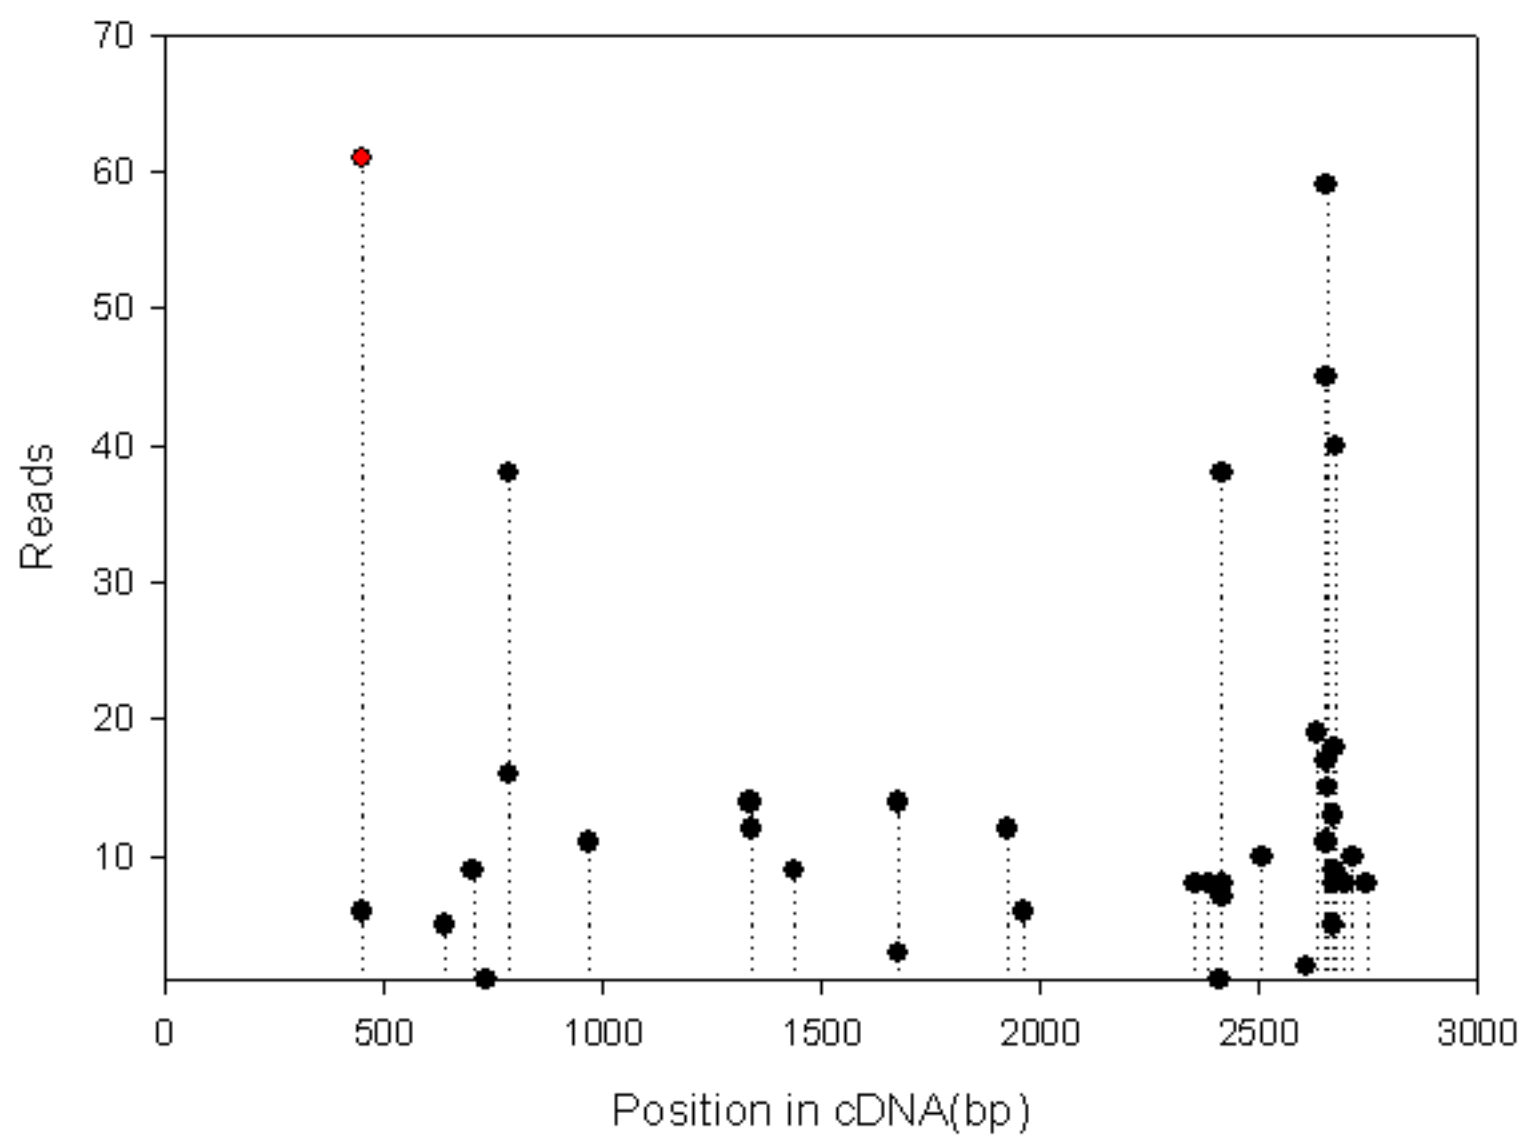

```

5' UUAUCAGCAUCAUGCAACAAAAUAGU 3'      Cs3g05320.1
   ::::::::::::::::::::::::::::
3' AAUAGUCGUAGUACGUUGUUUU----- 5'    Csi-miRN20
  
```

Csi-miRN37, target=Orange1.1t02400.1 gene=Orange1.1t02400  
 Category:2  
 Score=5  
 Cleavage Site=772

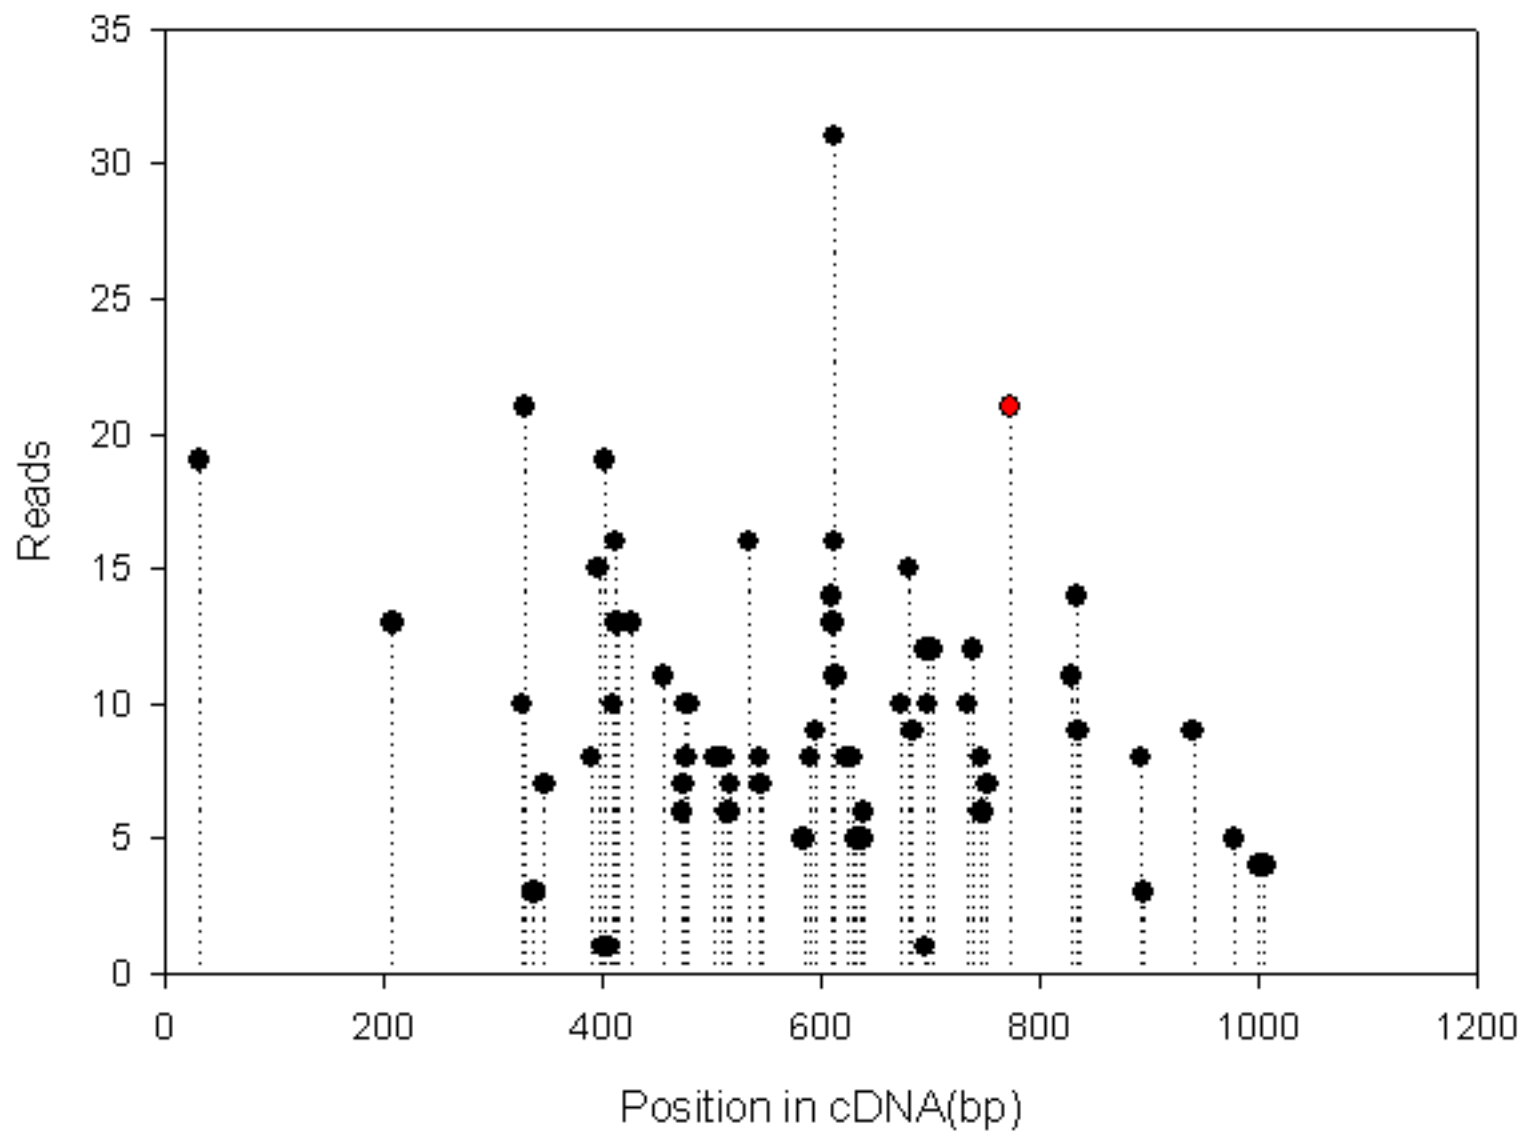

```

5' GAGUACAACU-AGCUUUUCCCUCAAGA 3'      Orange1.1t02400.1
      :  ::  :::::~::~:~::~:~::~:~::~:~::~:
3' ----GGAAGAUUCGAGAAGGGAGU---- 5'      Csi-miRN37

```

T-plots for targets of all  
miRNAs in flower



Csi-miR1092.2, target=Cs8g11330.1 gene=Cs8g11330  
 Category=3  
 Score=5  
 Cleavage Site=1168

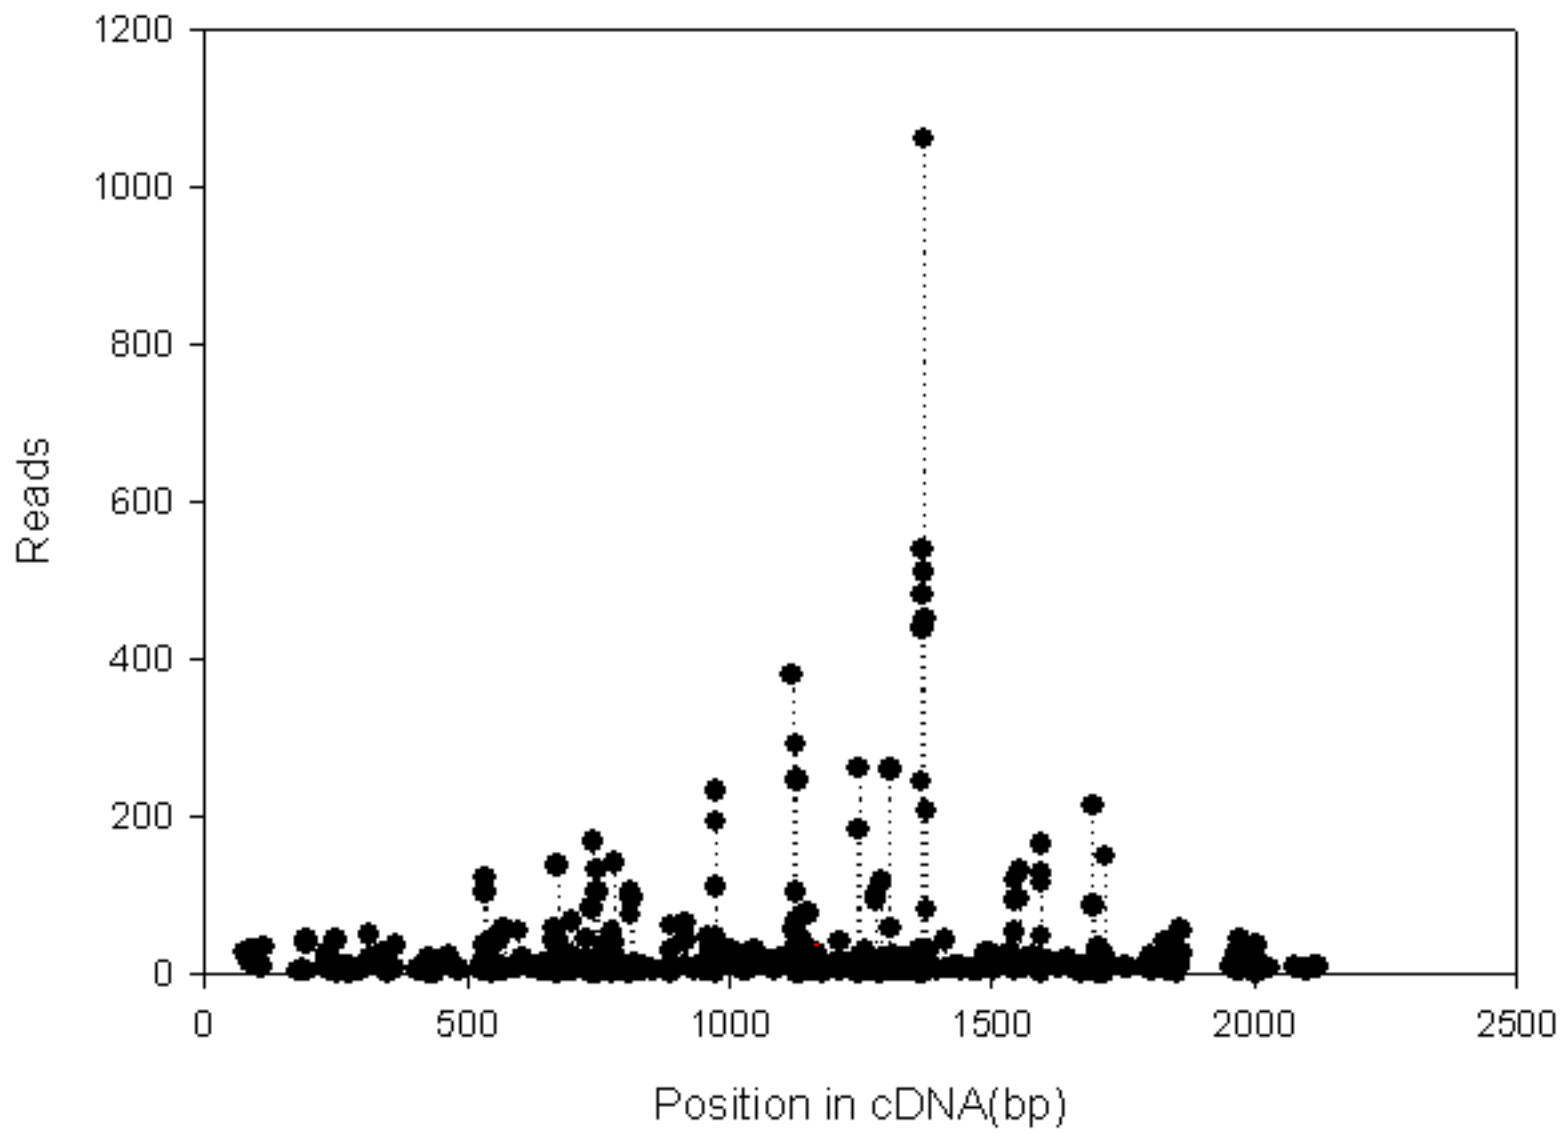

```

5' GGAAAUGUAUGCCAUUGGUGGAAGUG 3'      Cs8g11330.1
   :::::  :  :  :  :  :  :  :  :
3' CCUUUACUUAC-GAAACCACCUU--- 5'      csi-miR1092.2

```

Csi-miR1432a, target=Cs1g21570.1 gene=Cs1g21570  
 Category=3  
 Score=4  
 Cleavage Site=702

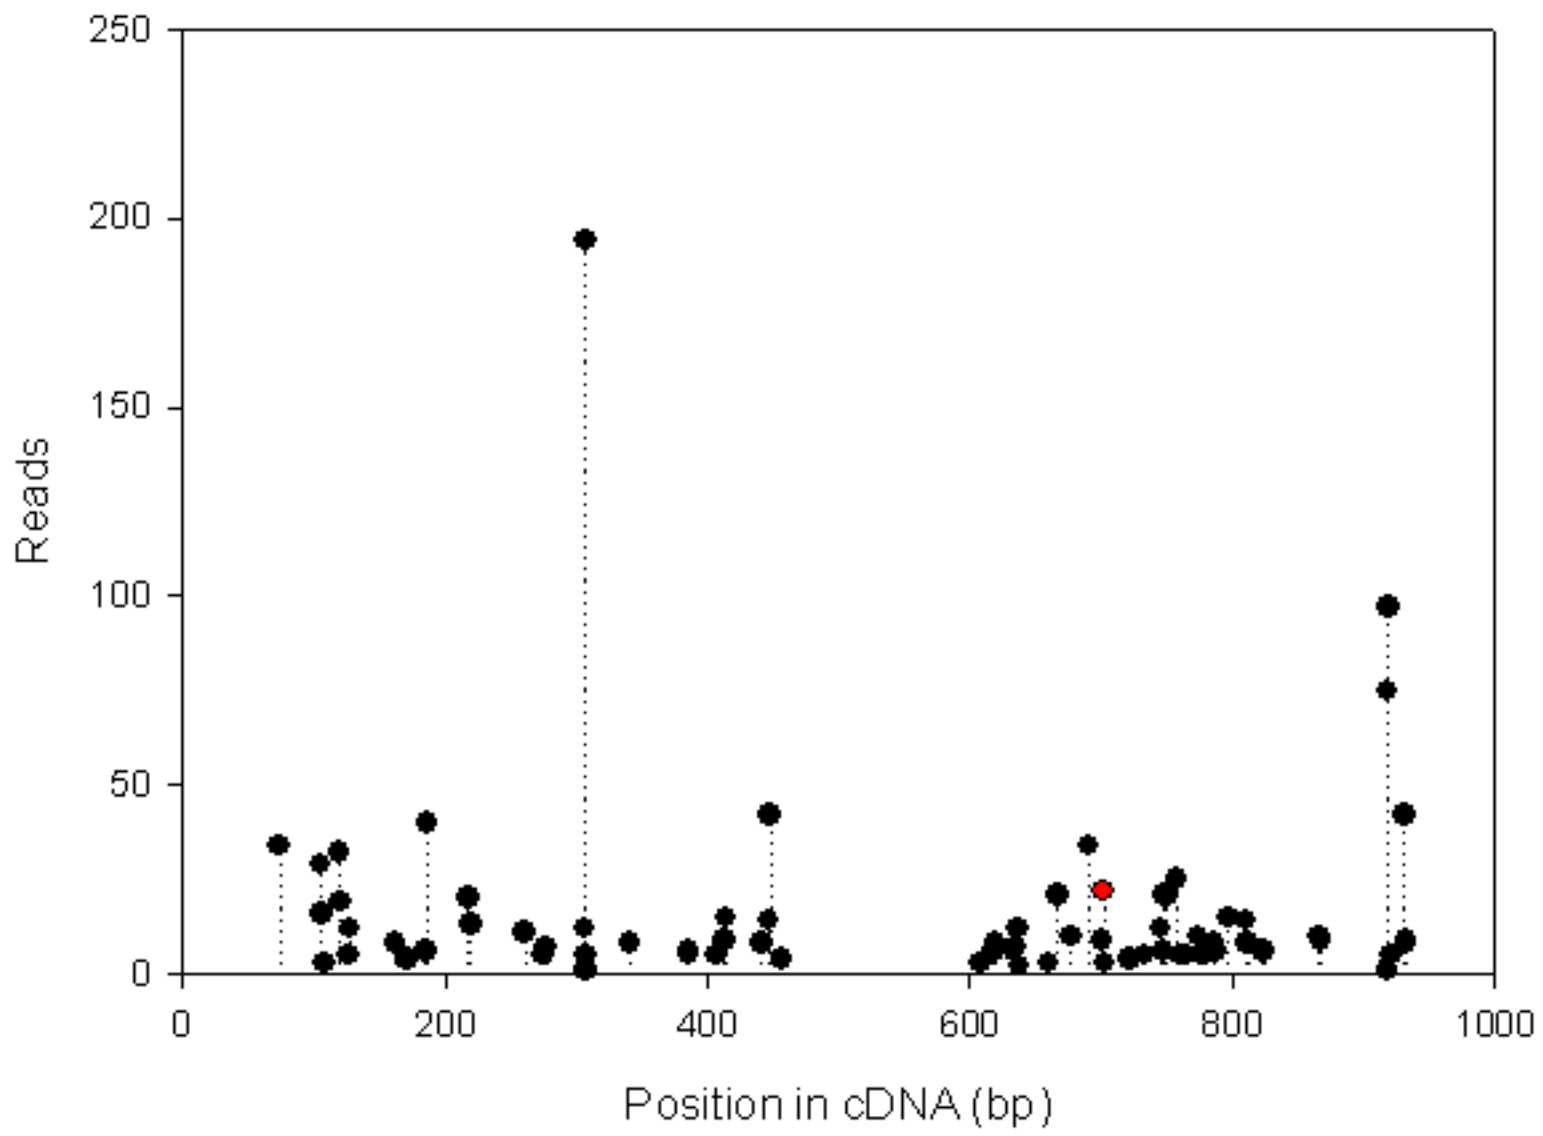

```

5' AAACUGAUUGUGUUGUCUCACCUGCA 3'      Cs1g21570.1
   .....
3' ----ACUGCCAUAGUAGAGUGGACGU 5'      Csi-miR1432a
  
```

Csi-miR1446, target=Cs7g23010.1 gene=Cs7g23010  
 Category=1  
 Score=4  
 Cleavage Site=3881

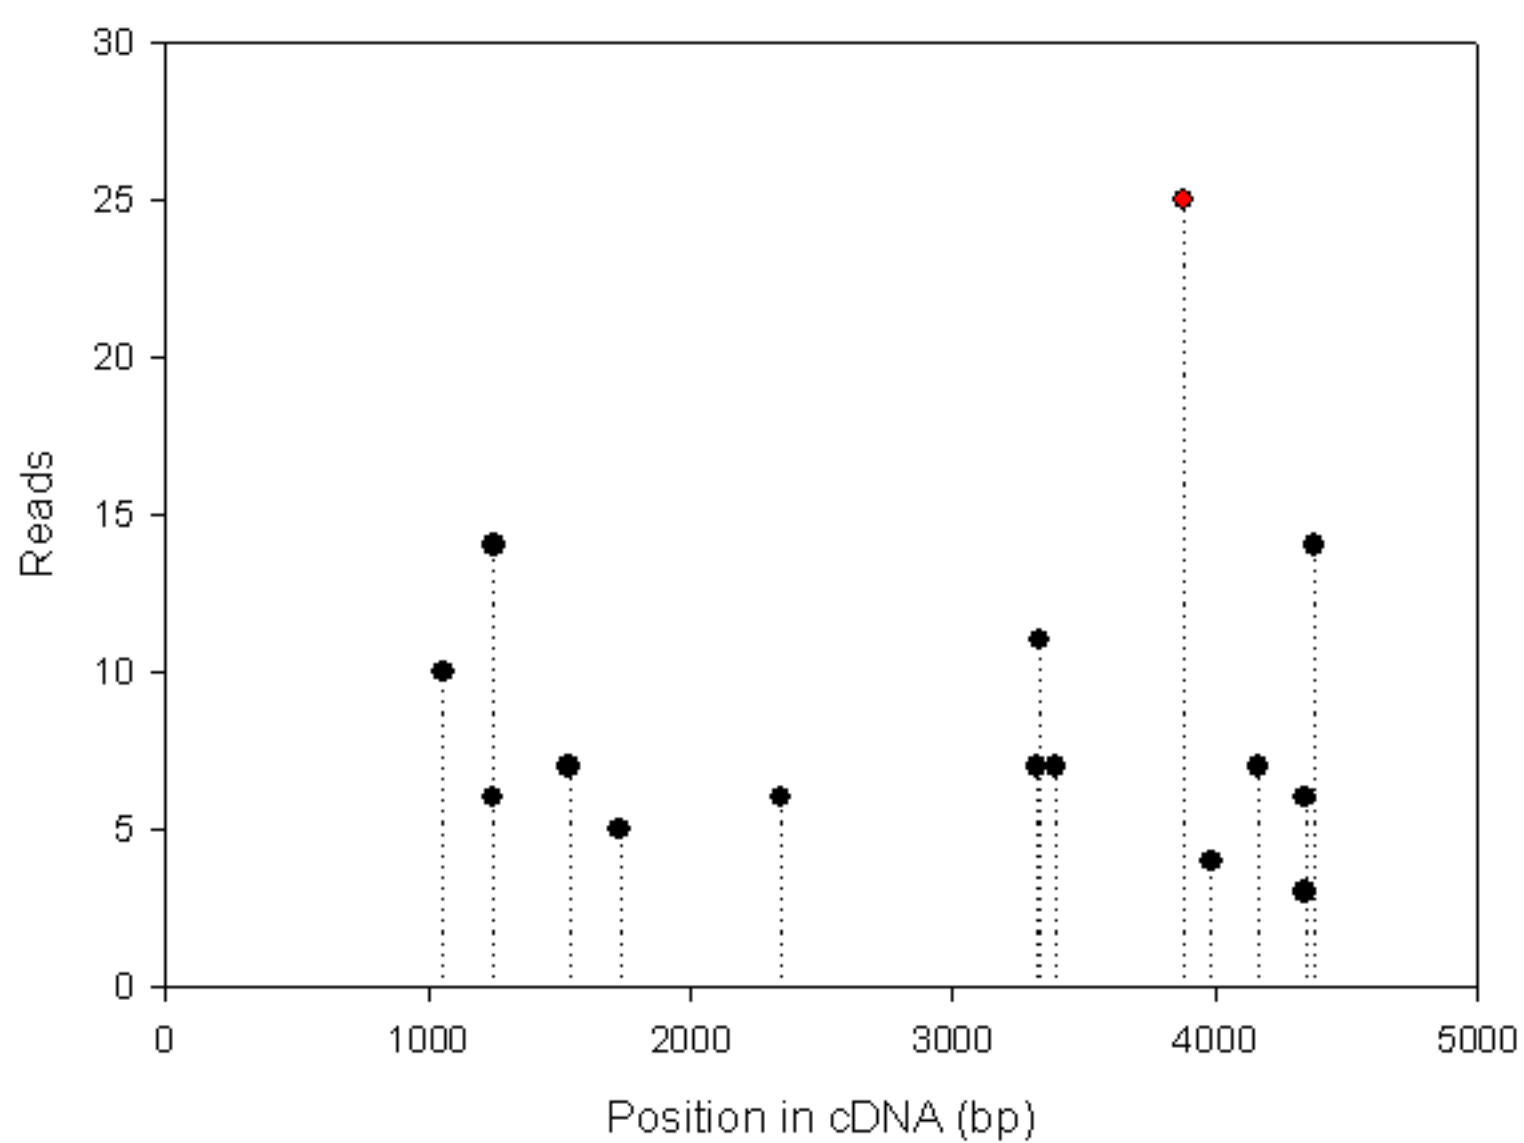

```

5' AAAGACGUUGAAGGAGAGAGUUUGAA 3'           Cs7g23010.1
   : : : : : : : : : : : : : : : : :
3' ---CGGCAACUCCCUCUCUCAAGC-- 5'           Csi-miR1446

```

Csi-miR156a.1, target=Cs2g05730.1 gene=Cs2g05730  
 Category:1  
 Score=1  
 Cleavage Site=818

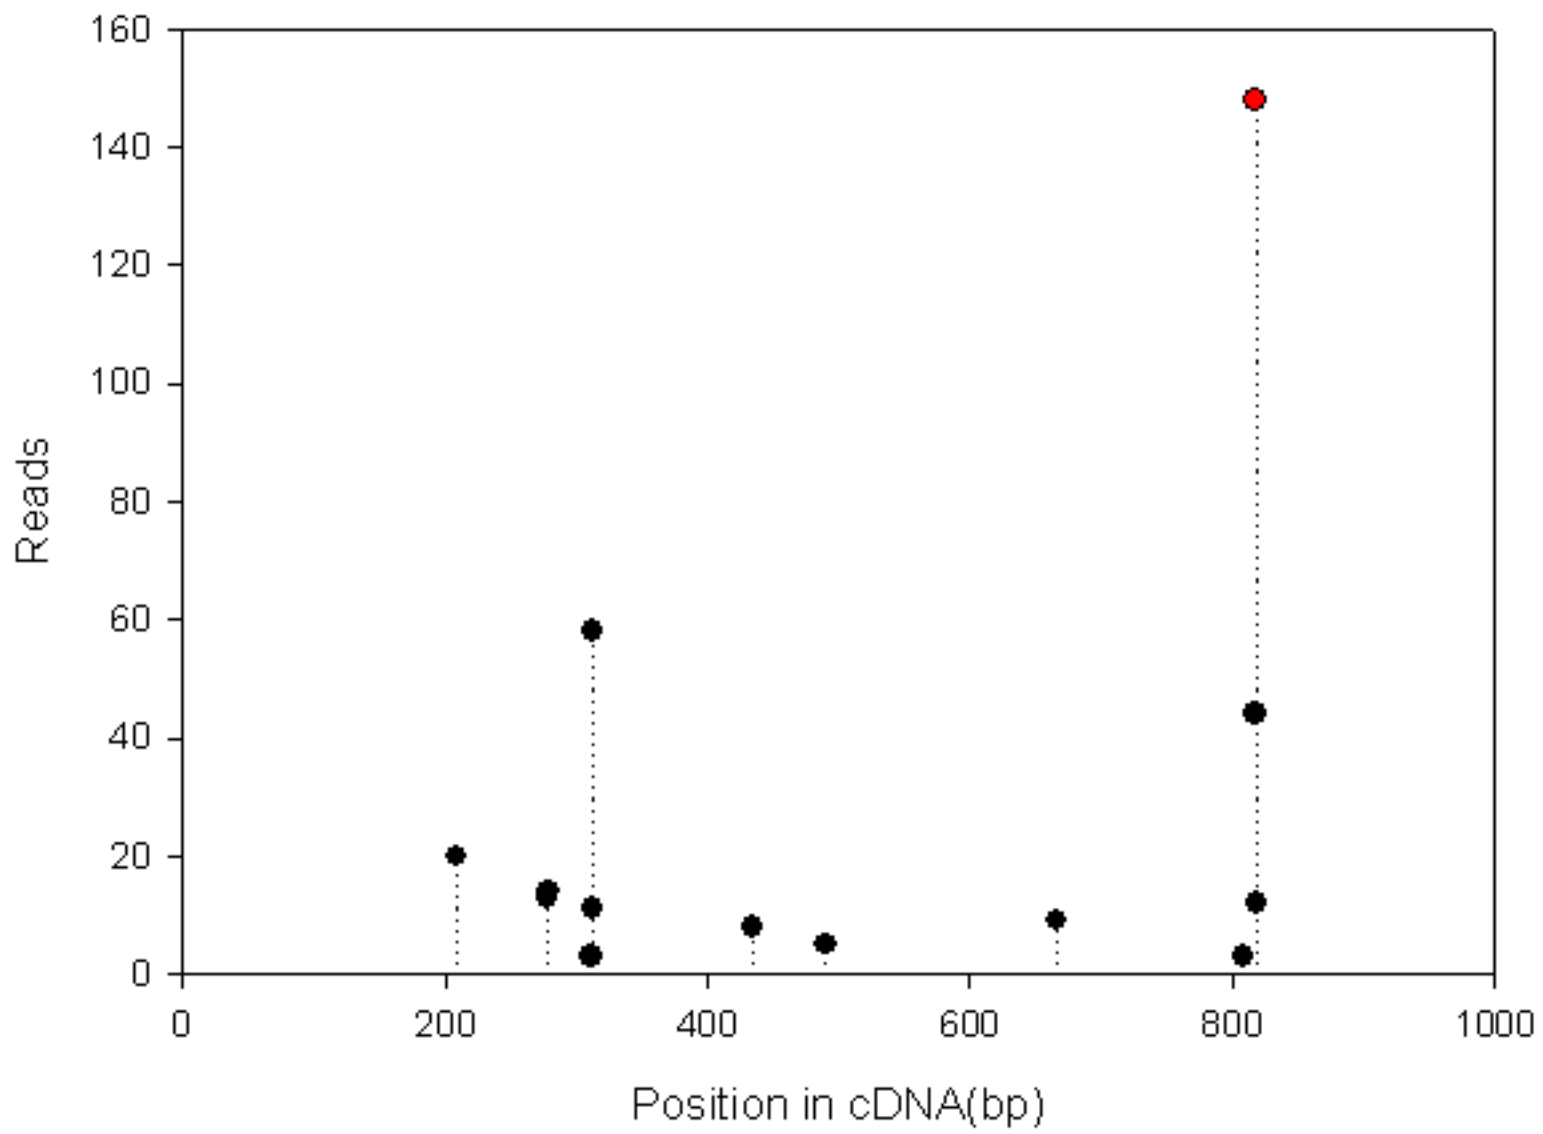

|    |                             |    |               |
|----|-----------------------------|----|---------------|
| 5' | CGUGCUCUCUCUCUUCUGUCA AUGCU | 3' | Cs2g05730.1   |
|    | .....                       |    |               |
| 3' | -CACGAGUGAGAGAAGACAGUU----  | 5' | Csi-miR156a.1 |

Csi-miR156a.1, target=Cs2g23550.1 gene=Cs2g23550  
 Category=1  
 Score=3  
 Cleavage Site=934

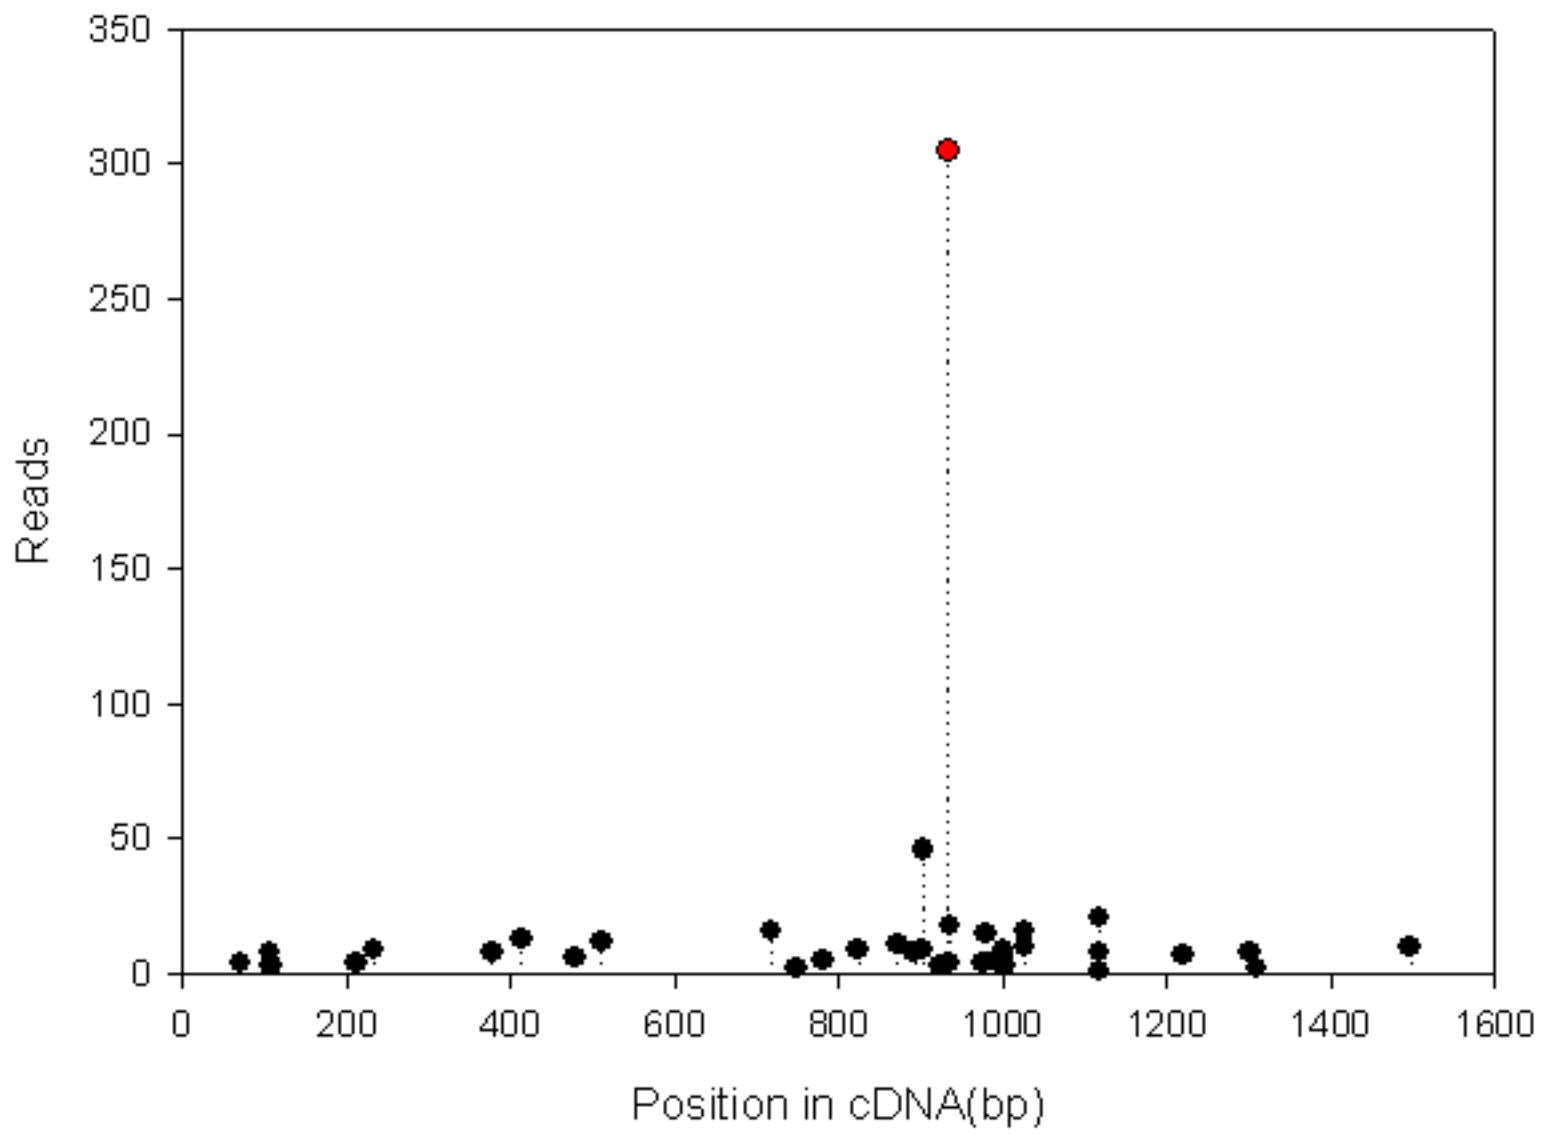

```

5' CAUGCUCUCUCUCUUCUGUCAUCCUA 3'      Cs2g23550.1
   : : : : : : : : : : : : : : : :
3' -CACGAGUGAGAGAAGACAGUU----- 5'    Csi-miR156a.1
  
```

Csi-miR156a.2, target=Cs2g05730.1 gene=Cs2g05730  
 Category:1  
 Score=1  
 Cleavage Site=818



5' CGUGCUCUCUCUCUUCUGUCA AUGCU 3'  
 ::::: :::::::::::::::  
 3' -CACGAGUGAGAGAAGACAGU----- 5'

Cs2g05730.1

Csi-miR156a.2

Csi-miR156a.2, target=Cs2g23550.1 gene=Cs2g23550  
 Category=1  
 Score=2  
 Cleavage Site=934

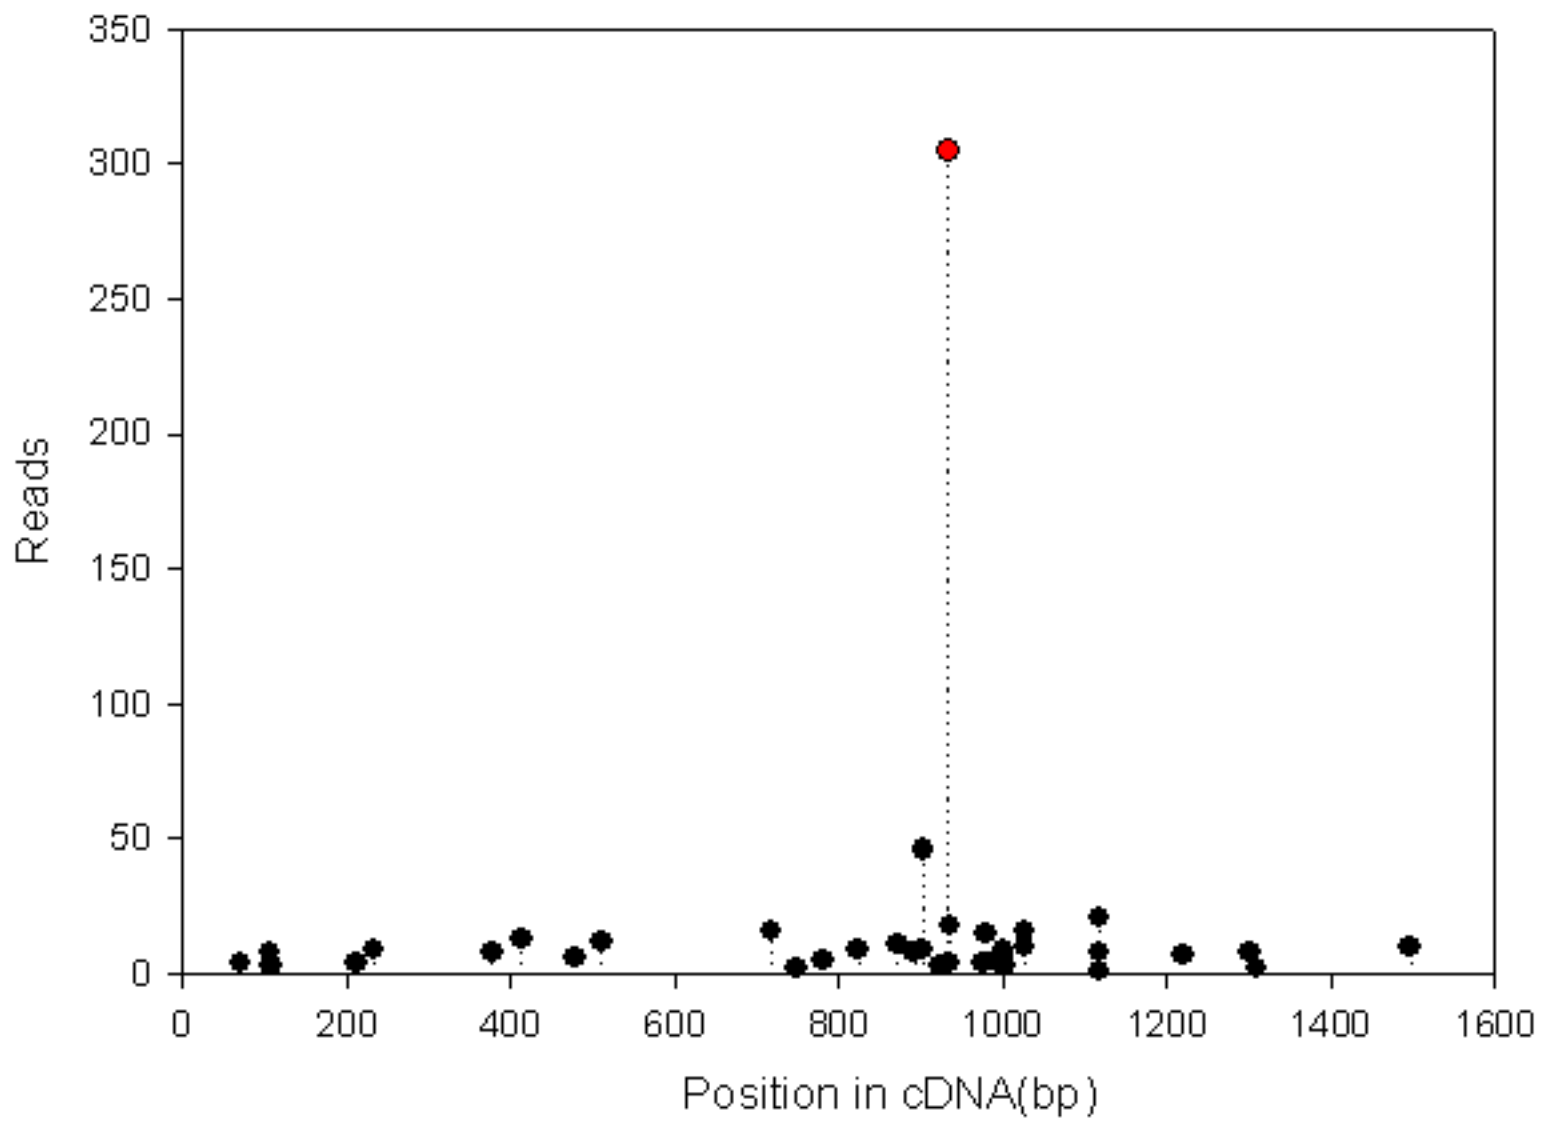

5' CAUGCUCUCUCUCUUCUGUCAUCCUA 3'

Cs2g23550.1

.....

3' -CACGAGUGAGAGAAGACAGU----- 5'

Csi-miR156a.2

Csi-miR156b.1, target=Cs2g05730.1 gene=Cs2g05730  
 Category:1  
 Score=2  
 Cleavage Site=818



```

5' CGUGCUCUCUCUCUUCUGUCA AUGCU 3'      Cs2g05730.1
   : : : : : : : : : : : : : : : :
3' -CACGAGUGAGAGAAGACAGUC----- 5'    Csi-miR156b.1
  
```



Csi-miR156b.1, target=Cs2g23550.1 gene=Cs2g23550  
 Category=1  
 Score=3  
 Cleavage Site=934

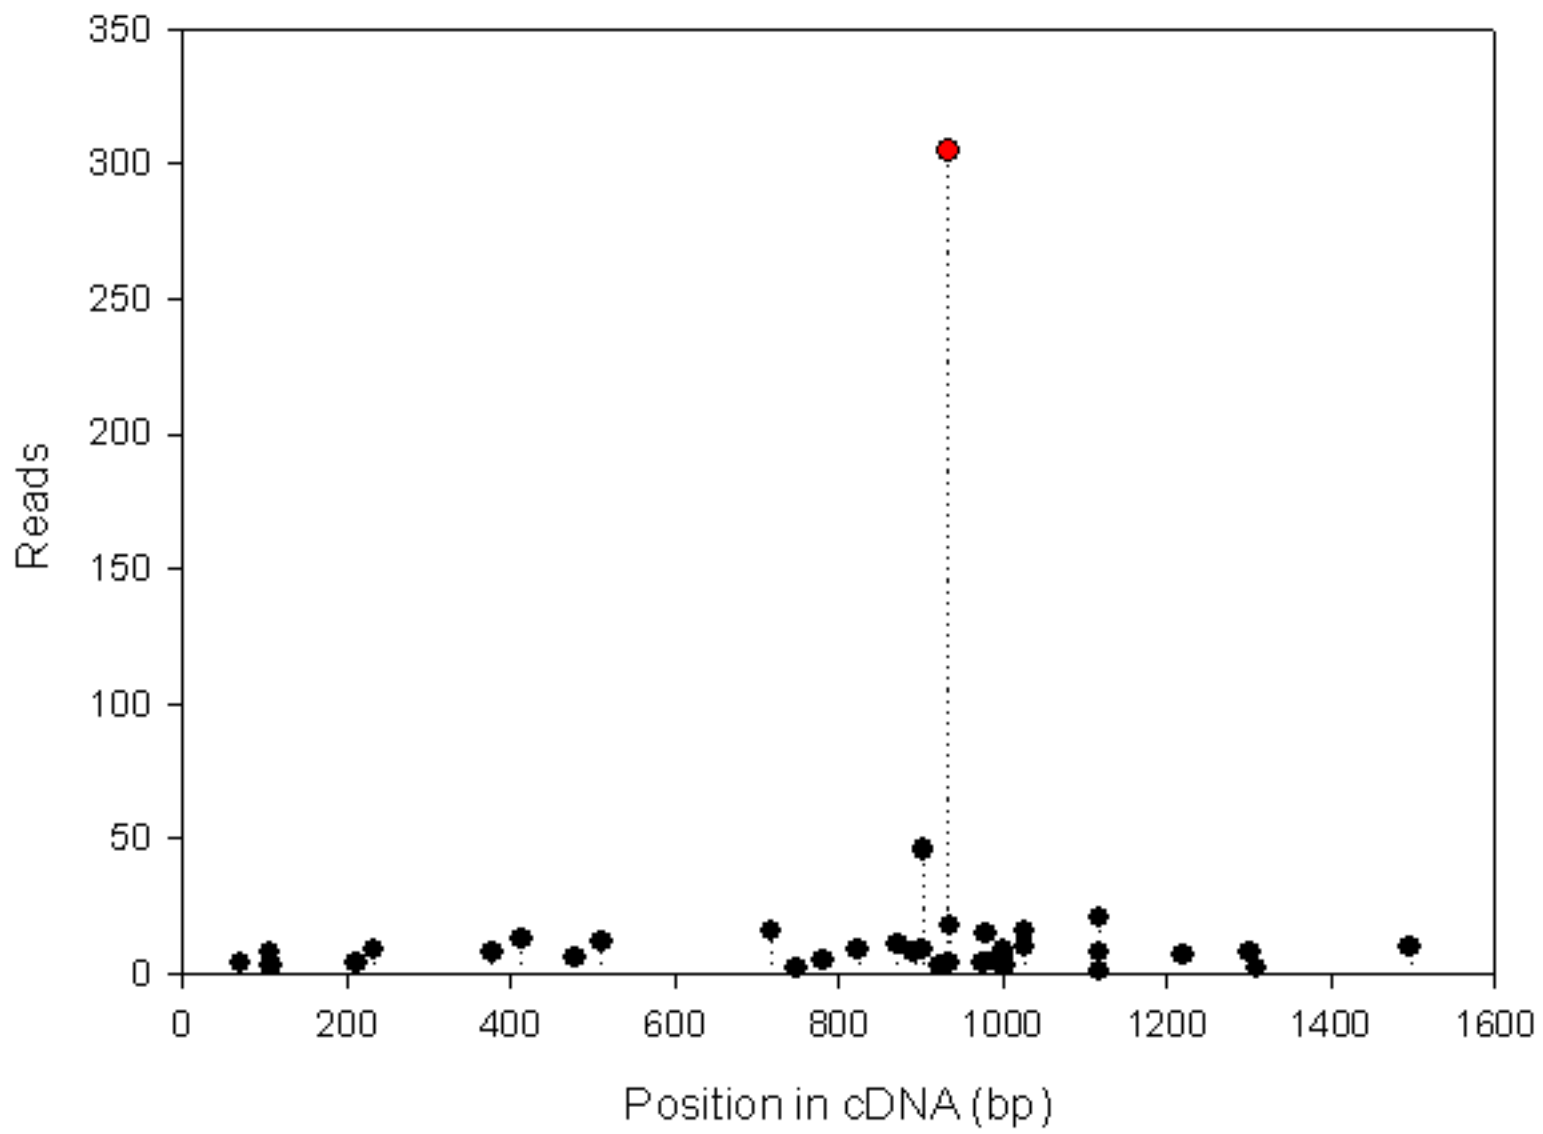

|    |                                           |    |               |
|----|-------------------------------------------|----|---------------|
| 5' | CAUGCUCUCUCUCUUCUGUCAUCCUA                | 3' | Cs2g23550.1   |
|    | : : : : : : : : : : : : : : : : : : : : : |    |               |
| 3' | -CACGAGUGAGAGAAGACAGUC----                | 5' | Csi-miR156b.1 |

Csi-miR156c.1, target=Cs2g05730.1 gene=Cs2g05730  
 Category:1  
 Score=2  
 Cleavage Site=818



```

5' CGUGCUCUCUCUCUUCUGUCA AUGCU 3'      Cs2g05730.1
   : : : : : : : : : : : : : : : :
3' ACACGAGUGAGAGAAGACAGU----- 5'      Csi-miR156c.1
  
```

Csi-miR156c.1, target=Cs2g23550.1 gene=Cs2g23550  
 Category=1  
 Score=3  
 Cleavage Site=934

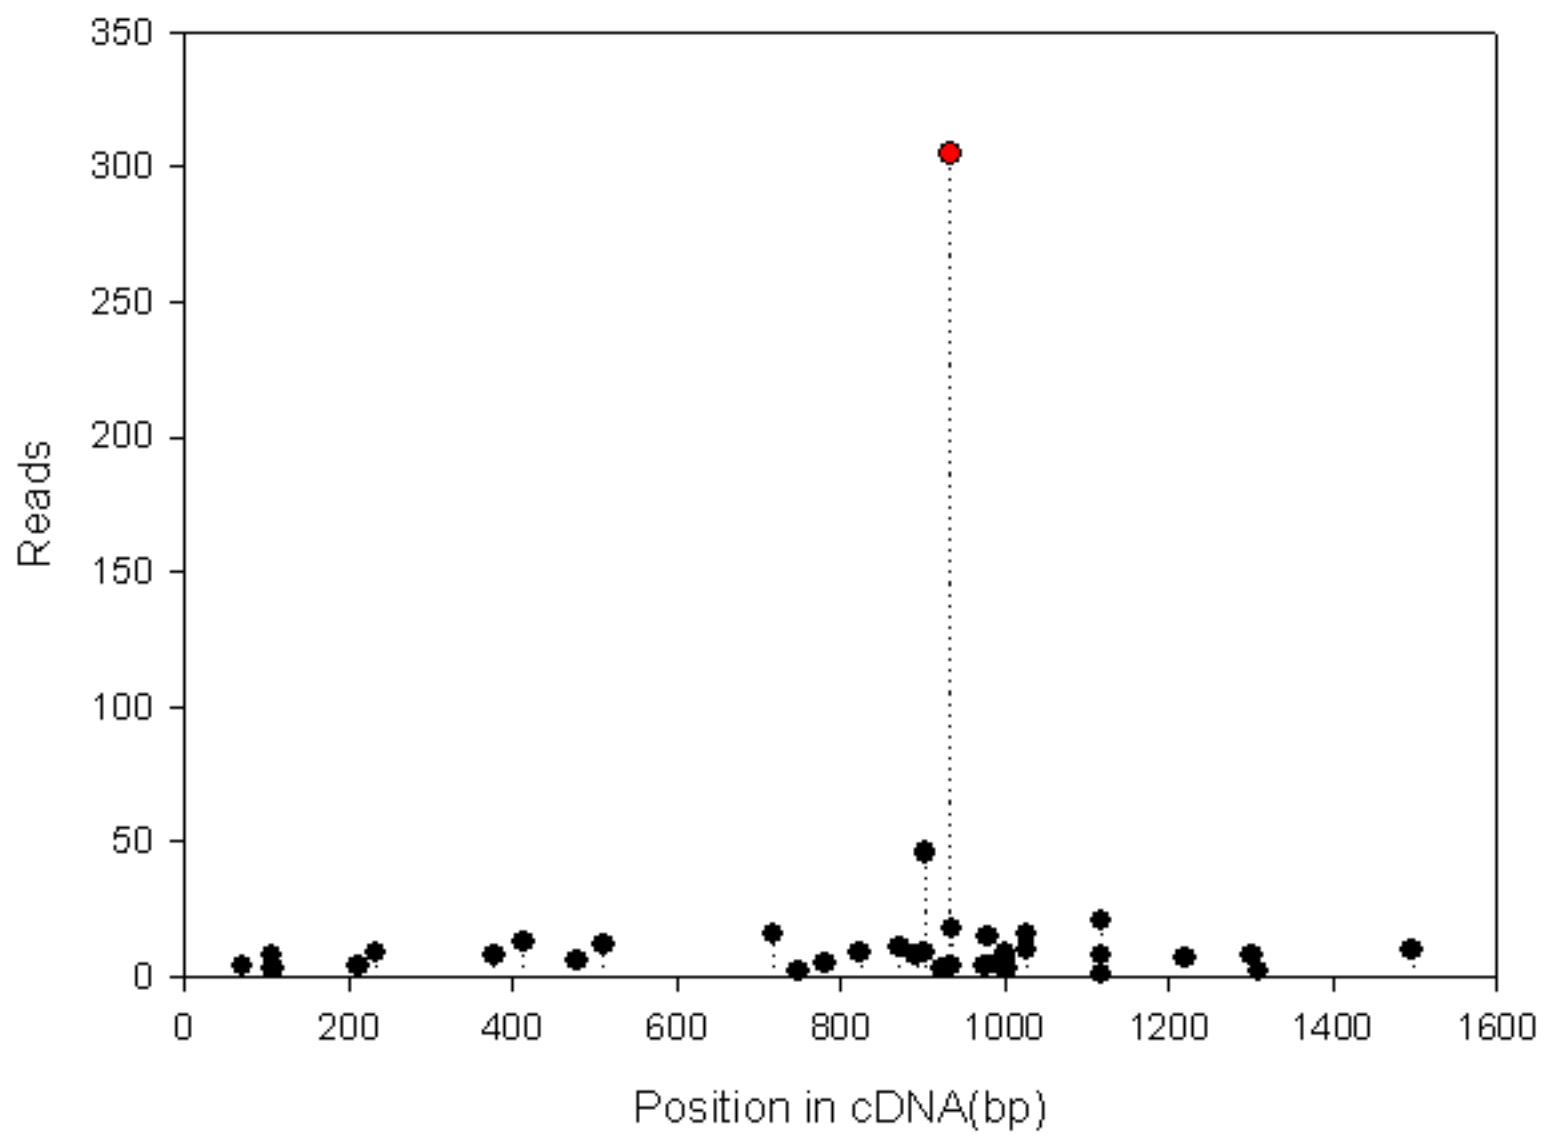

```

5' CAUGCUCUCUCUCUUCUGUCAUCCUA 3'      Cs2g23550.1
   ::::: ::::::::::::::::::::
3' ACACGAGUGAGAGAAGACAGU----- 5'      Csi-miR156c.1
  
```

Csi-miR156d, target=Cs2g05730.1 gene=Cs2g05730  
 Category:1  
 Score=2.5  
 Cleavage Site=818

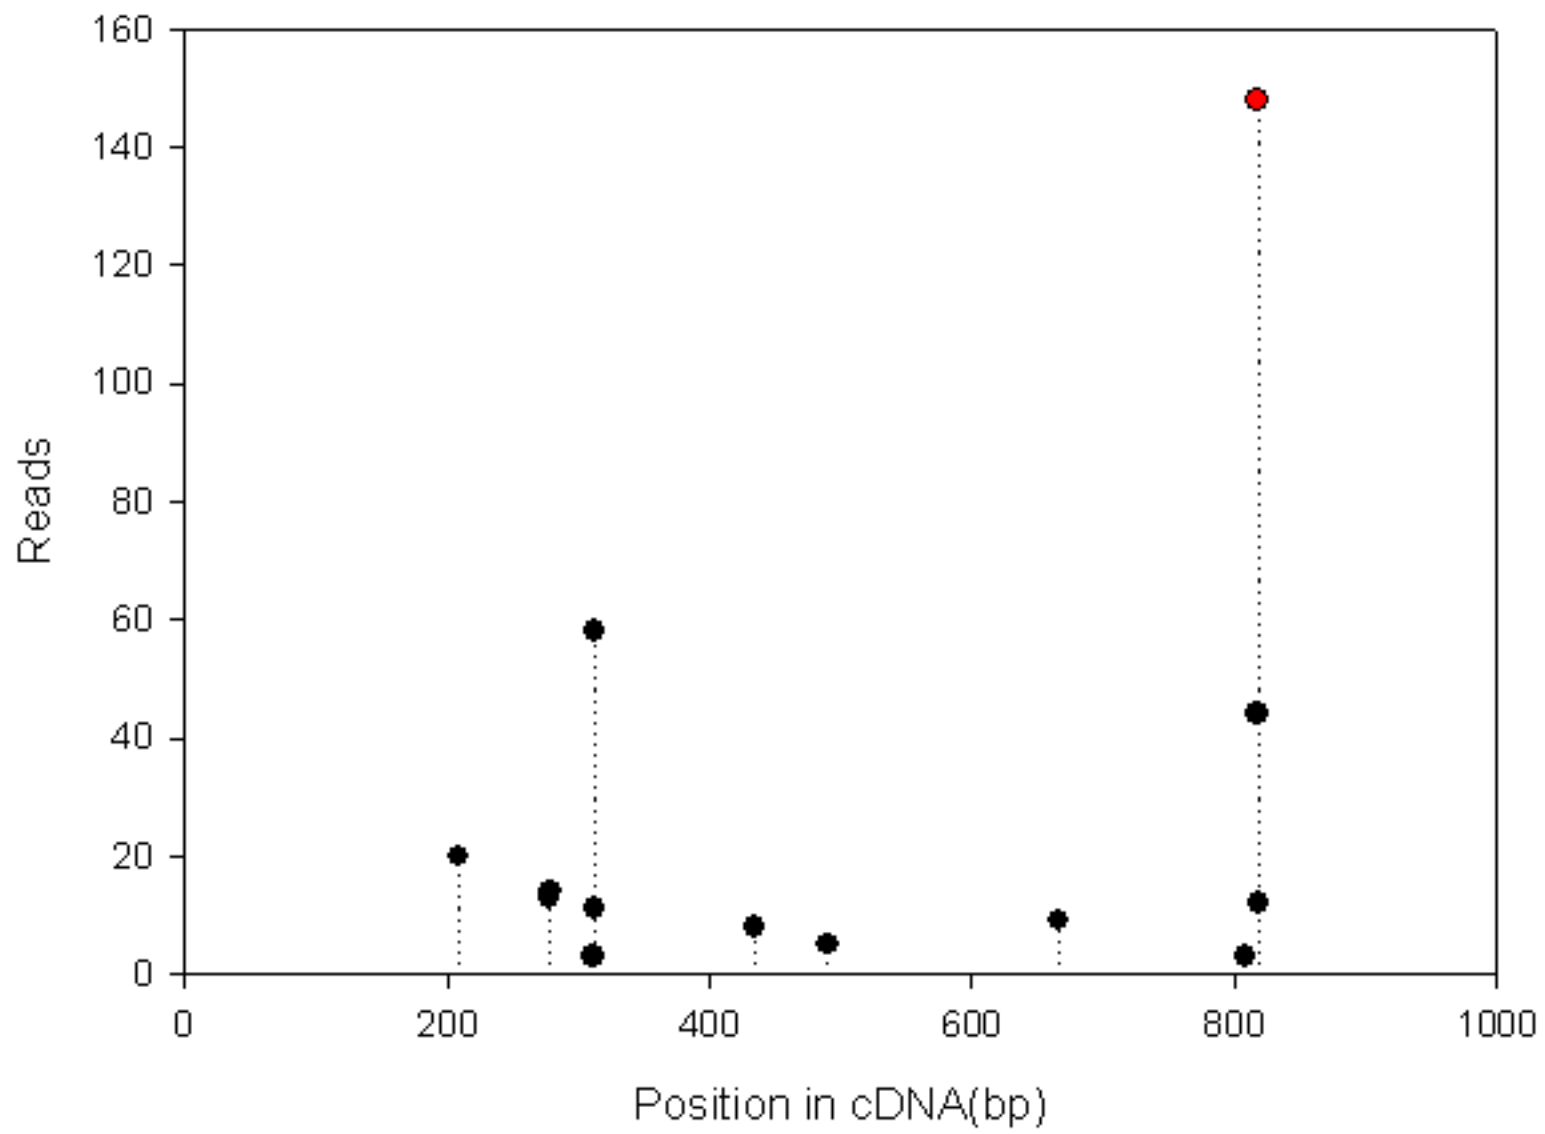

```

5' CGUGCUCUCUCUCUUCUGUCA AUGCU 3'      Cs2g05730.1
   :.:.:.:.:.:.:.:.:.:.:.:.:.:.:.
3' -CGCGAGAGAUAGAAGACAGU----- 5'      Csi-miR156d
  
```

Csi-miR156d, target=Cs2g23550.1 gene=Cs2g23550  
 Category=1  
 Score=3.5  
 Cleavage Site=934



|                                  |             |
|----------------------------------|-------------|
| 5' CAUGCUCUCUCUCUUCUGUCAUCCUA 3' | Cs2g23550.1 |
| .....                            |             |
| 3' -CGCGAGAGAUAGAAGACAGU----- 5' | Csi-miR156d |

Csi-miR156e, target=Cs2g05730.1 gene=Cs2g05730  
 Category:1  
 Score=3.5  
 Cleavage Site=818

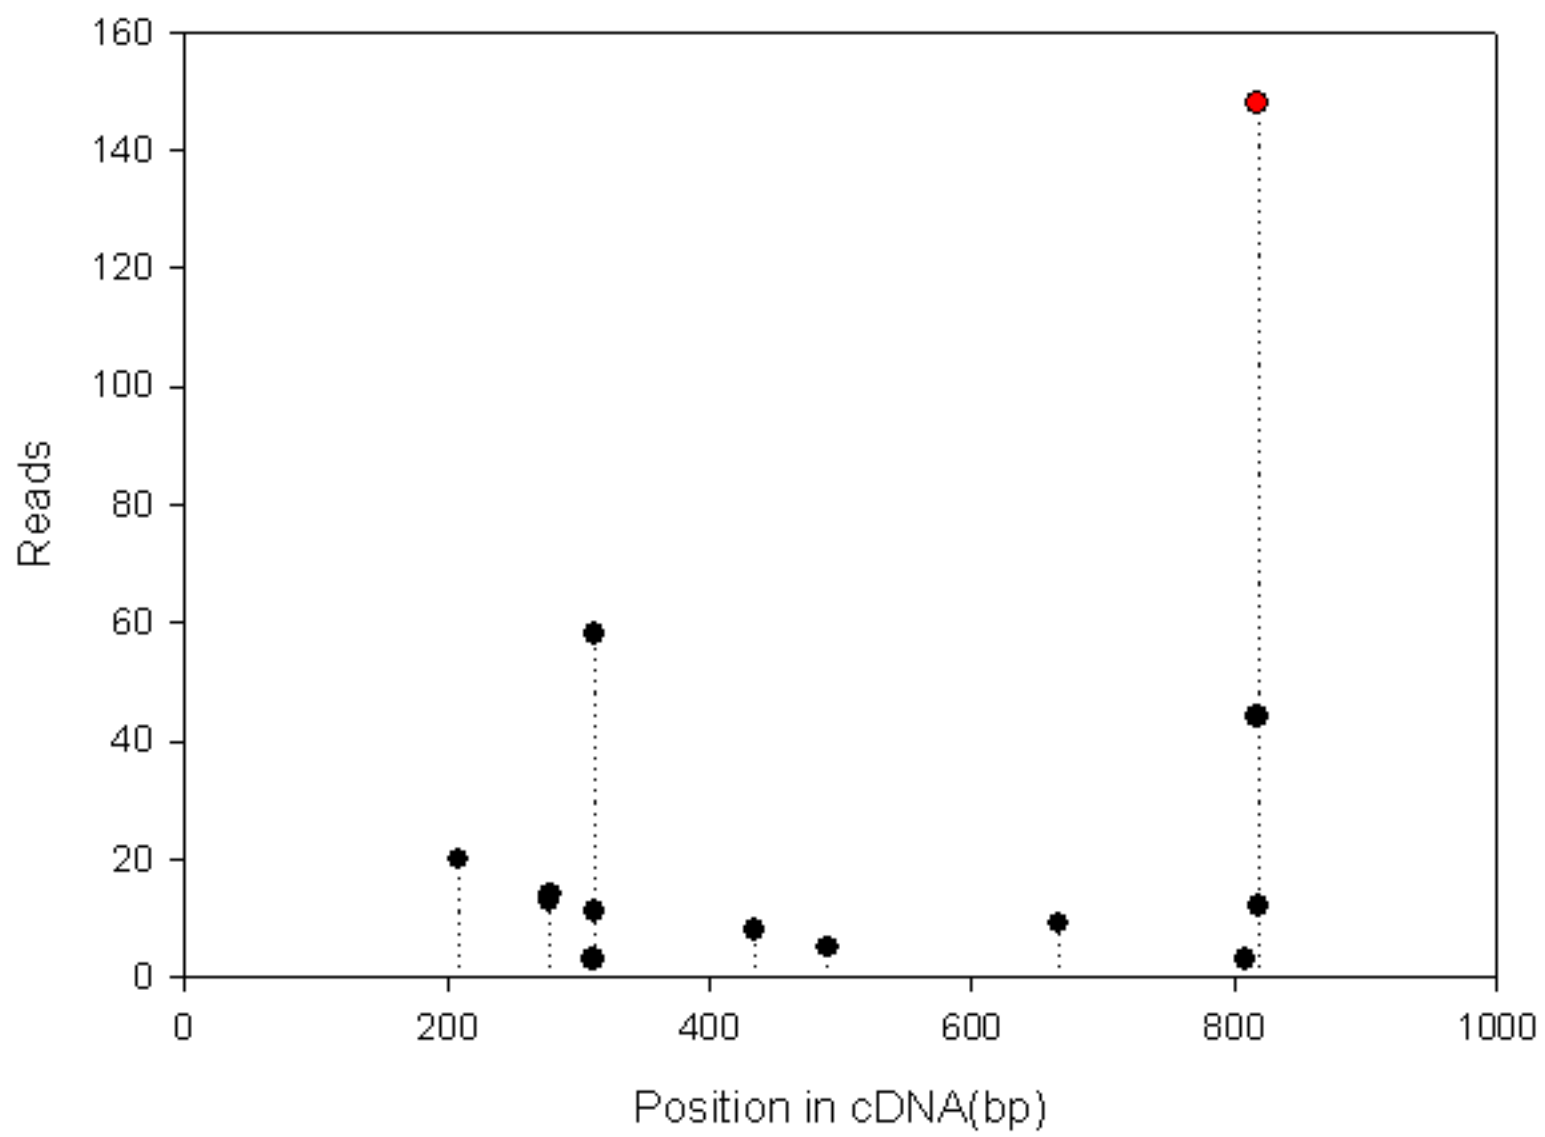

|                                   |             |
|-----------------------------------|-------------|
| 5' CGUGCUCUCUCUCUUCUGUCA AUGCU 3' | Cs2g05730.1 |
| .....                             |             |
| 3' -CGCGAGAGAUAGAAGACAGUG----- 5' | Csi-miR156e |

Csi-miR156e, target=Cs2g23550.1 gene=Cs2g23550  
 Category=1  
 Score=4  
 Cleavage Site=934

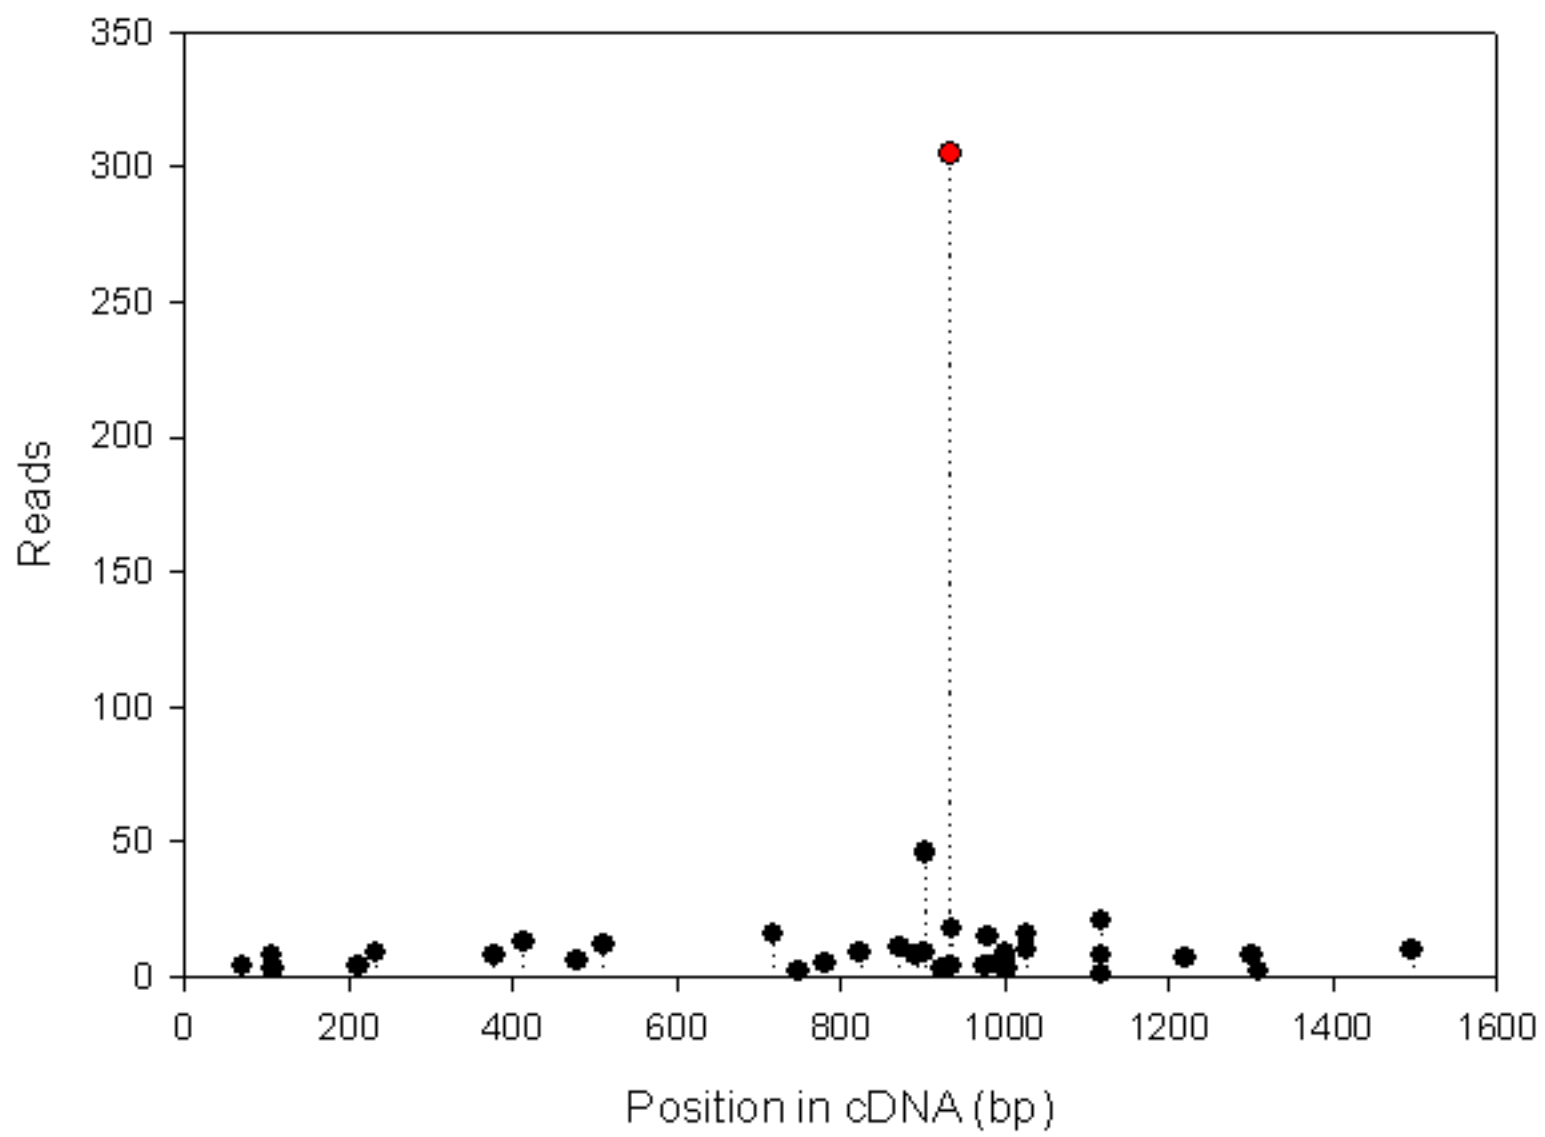

```

5' CAUGCUCUCUCUCUCUUCUGUCAUCCUA 3'          Cs2g23550.1
   .....
3' -CGCGAGAGAUAGAAGACAGUG----- 5'          Csi-miR156e
  
```

Csi-miR156f.2, target=Cs2g05730.1 gene=Cs2g05730  
 Category:1  
 Score=1.5  
 Cleavage Site=818



|    |                             |    |               |
|----|-----------------------------|----|---------------|
| 5' | CGUGCUCUCUCUCUUCUGUCA AUGCU | 3' | Cs2g05730.1   |
|    | .....                       |    |               |
| 3' | -CAUGAGAGAGAGAAGACAGUA----  | 5' | Csi-miR156f.2 |



Csi-miR156f.2, target=Cs2g23550.1 gene=Cs2g23550  
 Category=1  
 Score=1.5  
 Cleavage Site=934

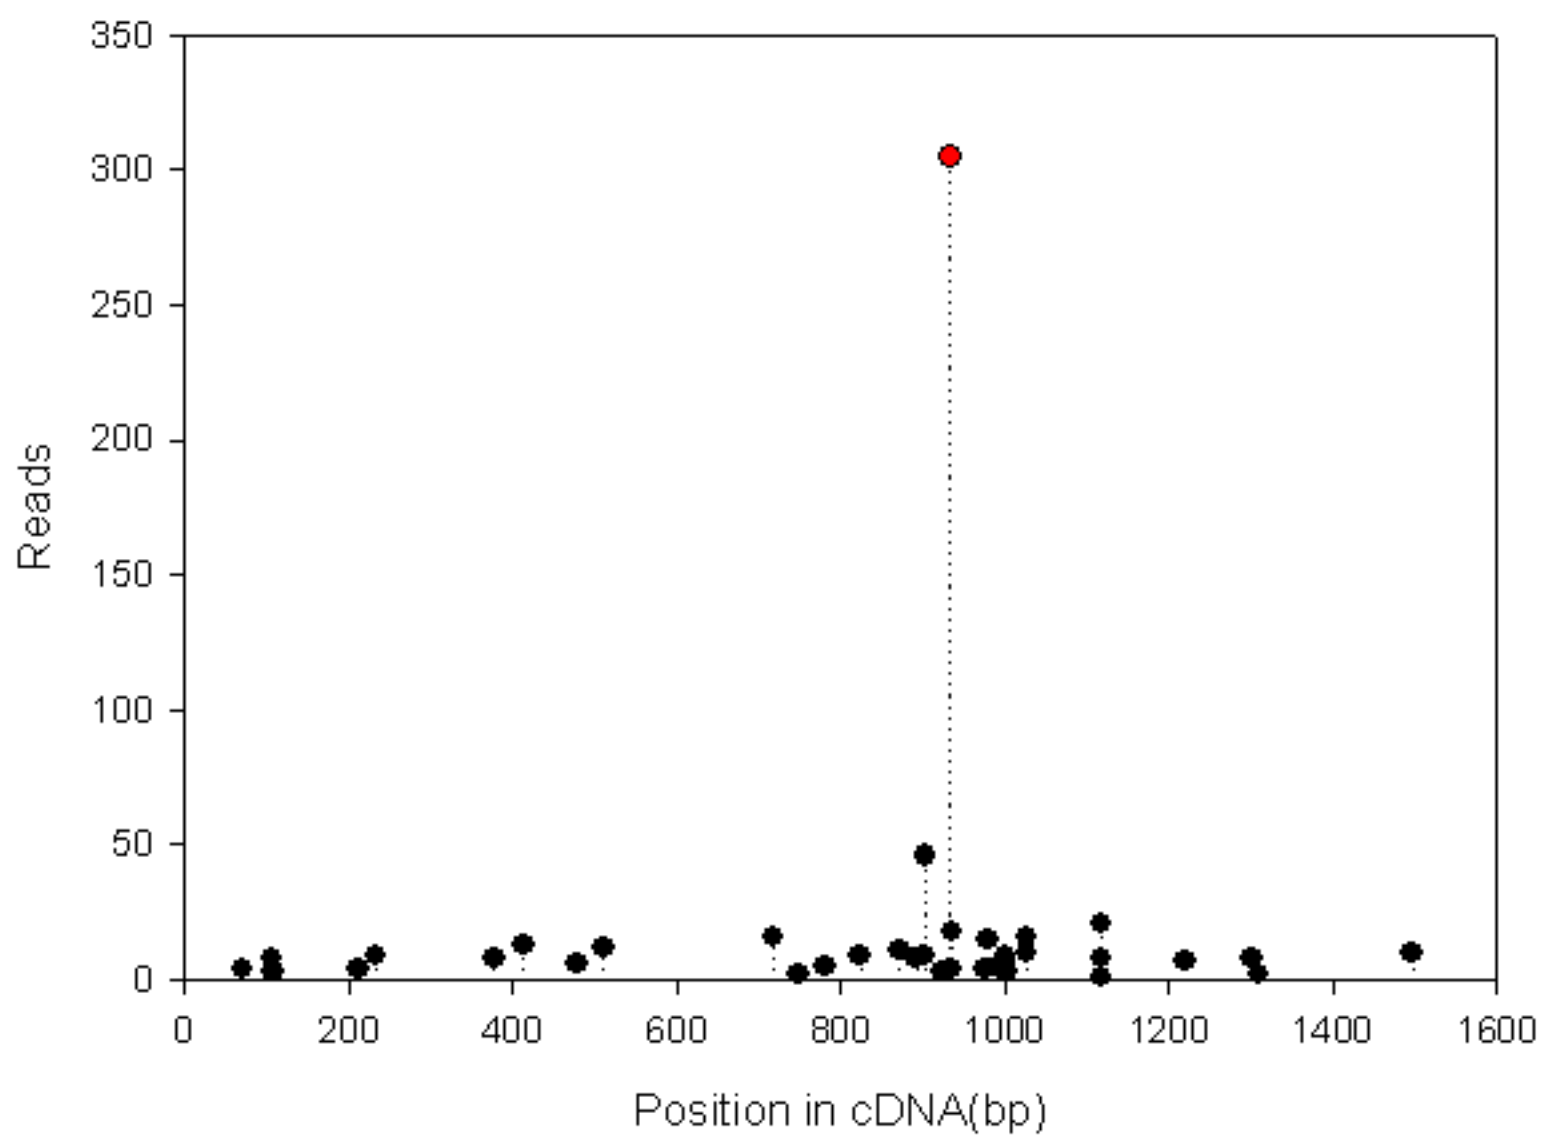

5' CAUGCUCUCUCUCUUCUGUCAUCCUA 3'

Cs2g23550.1

.....

3' -CAUGAGAGAGAGAAGACAGUA---- 5'

Csi-miR156f.2

Csi-miR156f.2, target=Cs8g19900.1 gene=Cs8g19900  
 Category=2  
 Score=5  
 Cleavage Site=2794

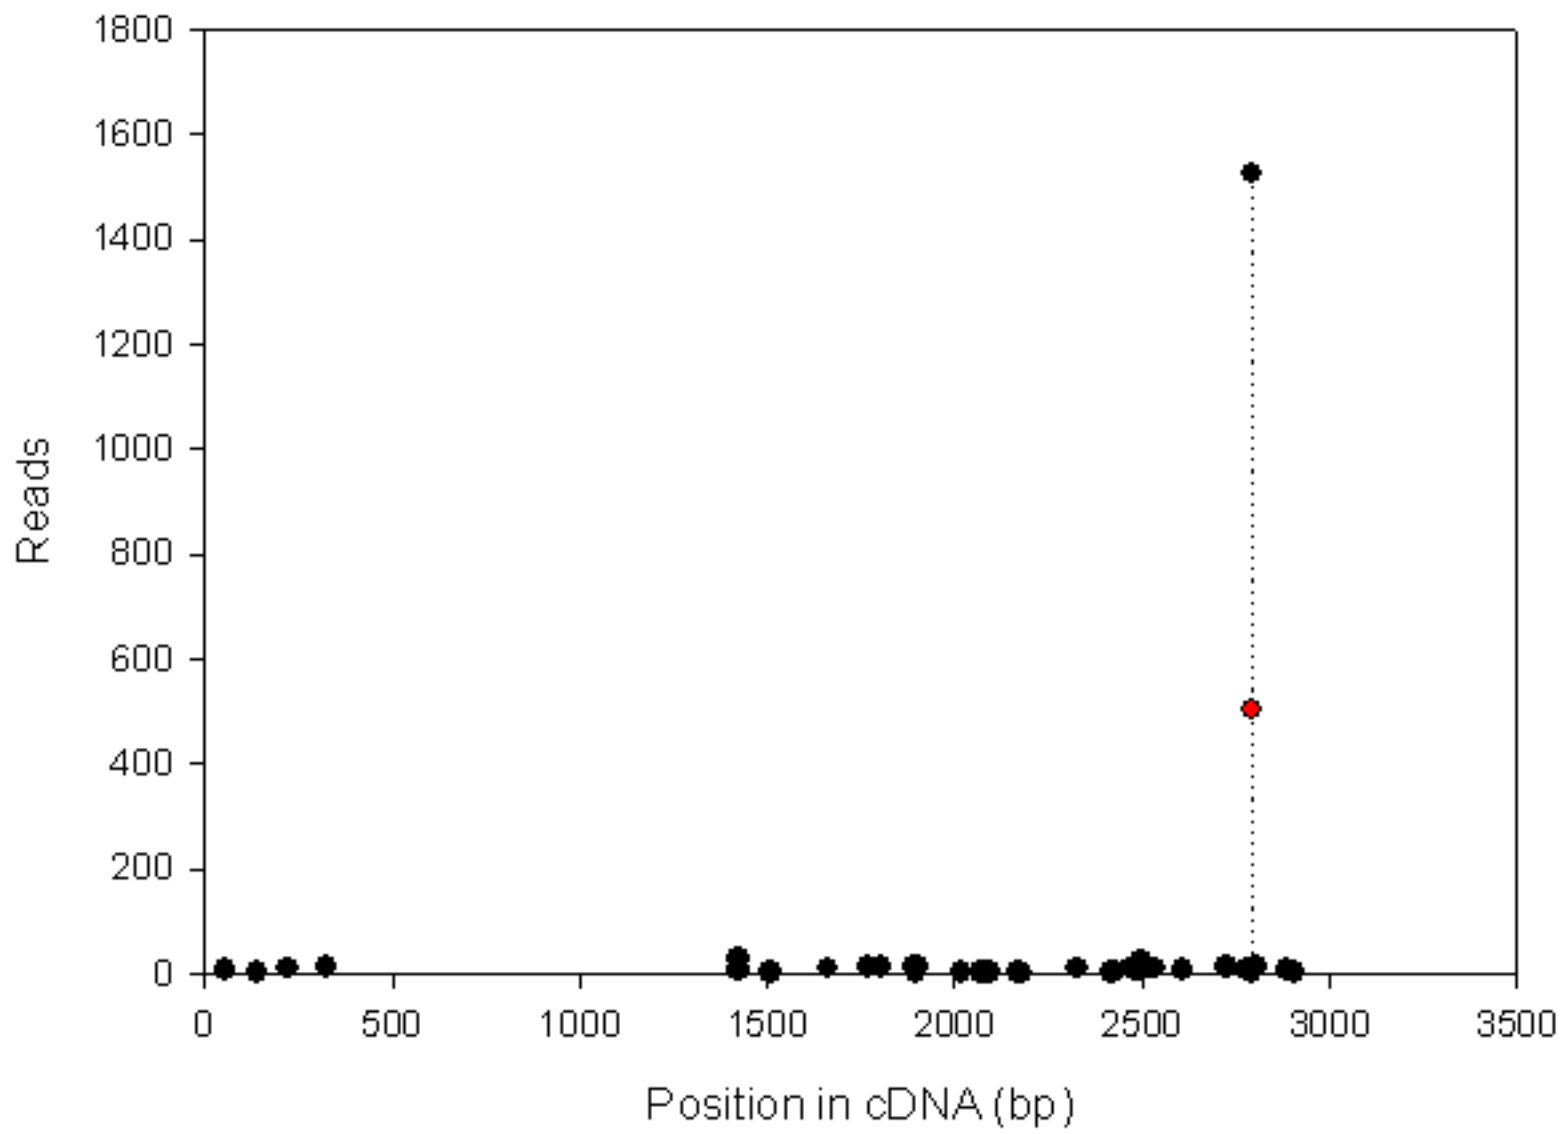

|    |                       |         |     |               |
|----|-----------------------|---------|-----|---------------|
| 5' | GUG-UCUUUCUCUUUUGACA  | UUAUGAG | 3'  | Cs8g19900.1   |
|    | ...                   | .....   | ... |               |
| 3' | CAUGAGAGAGAGAAGACAGUA | -----   | 5'  | Csi-miR156f.2 |

Csi-miR156g.1, target=Cs2g05730.1 gene=Cs2g05730  
 Category:1  
 Score=3  
 Cleavage Site=818



```

5' CGUGCUCUCUCUCUUCUGUCA AUGCU 3'      Cs2g05730.1
   ::::::::::: :::::::::::
3' -CACGAGAGAUAGAAGGCAGUU---- 5'      Csi-miR156g.1
  
```

Csi-miR156g.1, target=Cs2g23550.1 gene=Cs2g23550  
 Category=1  
 Score=5  
 Cleavage Site=934



```

5' CAUGCUCUCUCUCUUCUGUCAUCCUA 3'      Cs2g23550.1
   ::::::::::: :::::::::::
3' -CACGAGAGAUAGAAGGCAGUU---- 5'      Csi-miR156g.1

```

Csi-miR156g.2, target=Cs2g05730.1 gene=Cs2g05730  
 Category:1  
 Score=3  
 Cleavage Site=818



```

5' CGUGCUCUCUCUCUUCUGUCA AUGCU 3'      Cs2g05730.1
   ::::::::::: :::::::::::
3' -CACGAGAGAUAGAAGGCAGU----- 5'      Csi-miR156g.2
  
```

Csi-miR156g.2, target=Cs2g23550.1 gene=Cs2g23550  
 Category=1  
 Score=4  
 Cleavage Site=934



```

5' CAUGCUCUCUCUCUUCUGUCAUCCUA 3'      Cs2g23550.1
   :::::::::: ::::::::::
3' -CACGAGAGAUAGAAGGCAGU----- 5'      Csi-miR156g.2
  
```

Csi-miR156h, target=Cs2g05730.1 gene=Cs2g05730  
 Category:1  
 Score=0  
 Cleavage Site=818



```

5' CGUGCUCUCUCUCUUCUGUCA AUGCU 3'      Cs2g05730.1
   ::::::::::::::::::::
3' -CACGAGAGAGAGAAGACAGUU----- 5'      Csi-miR156h
  
```

Csi-miR156h, target=Cs2g23550.1 gene=Cs2g23550  
 Category=1  
 Score=2  
 Cleavage Site=934

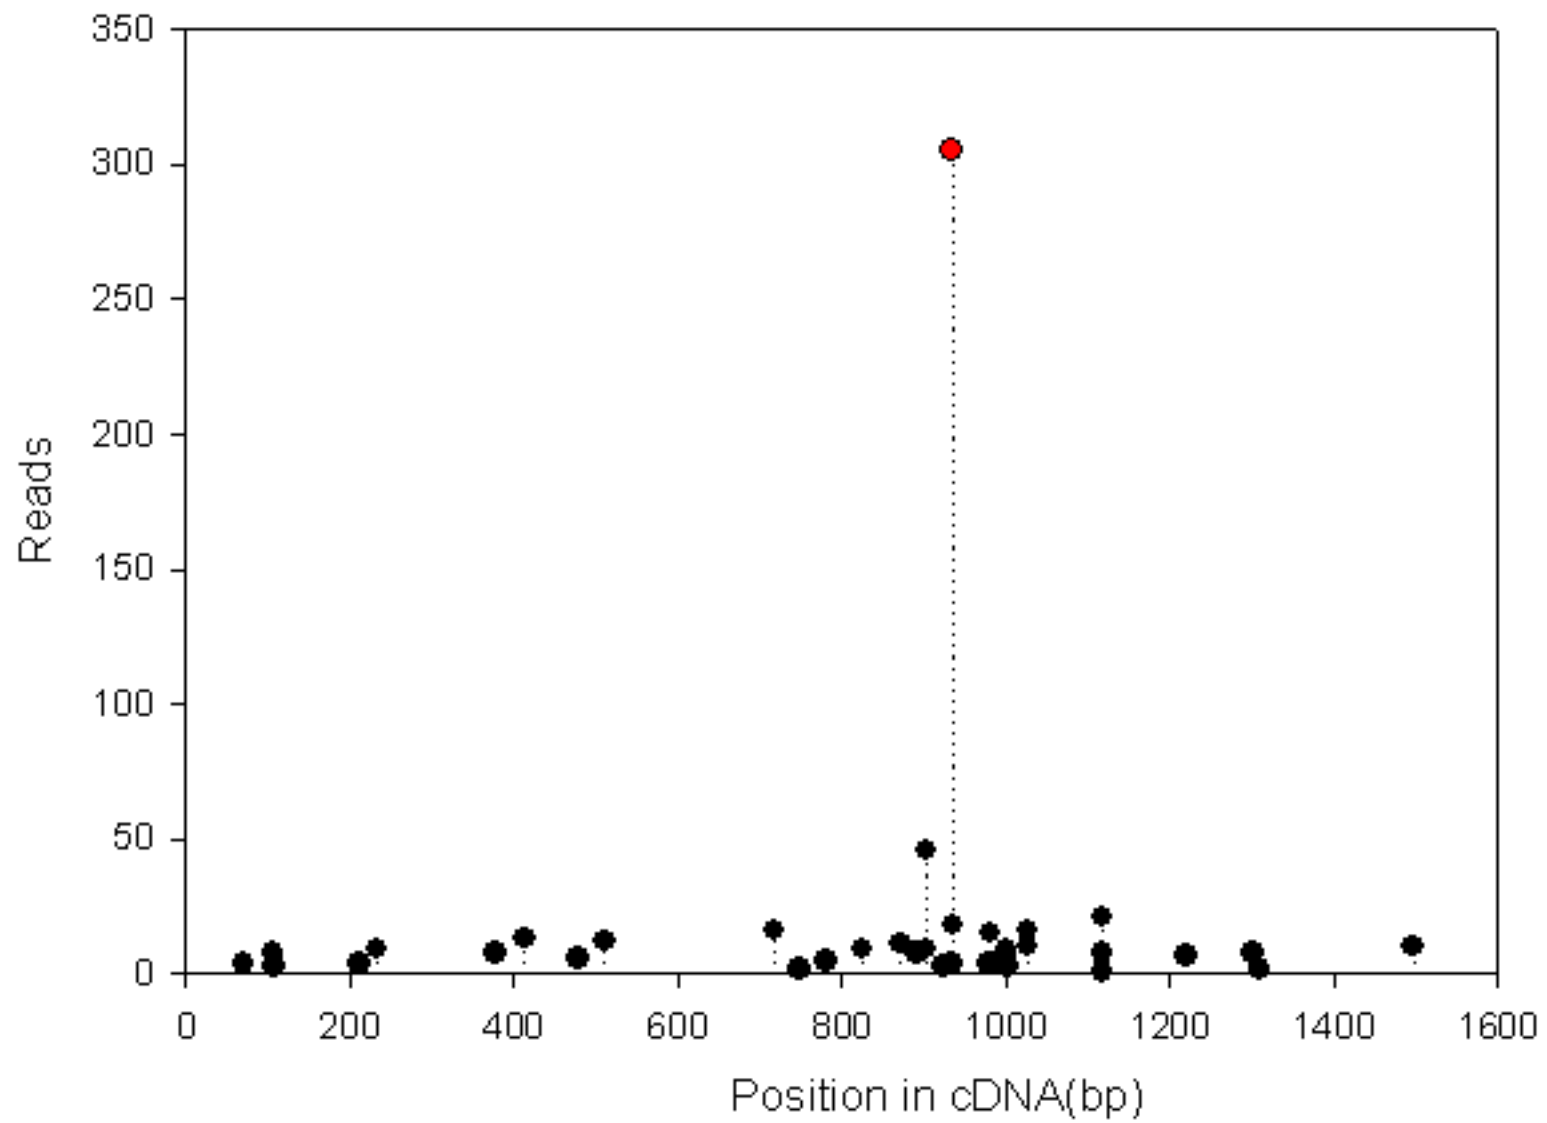

```

5' CAUGCUCUCUCUCUUCUGUCAUCCUA 3'      Cs2g23550.1
   ::::::::::::::::::::
3' -CACGAGAGAGAGAAGACAGUU---- 5'      Csi-miR156h
  
```



Csi-miR159, target=Cs3g06390.1 gene=Cs3g06390  
 Category=1  
 Score=3.5  
 Cleavage Site=773

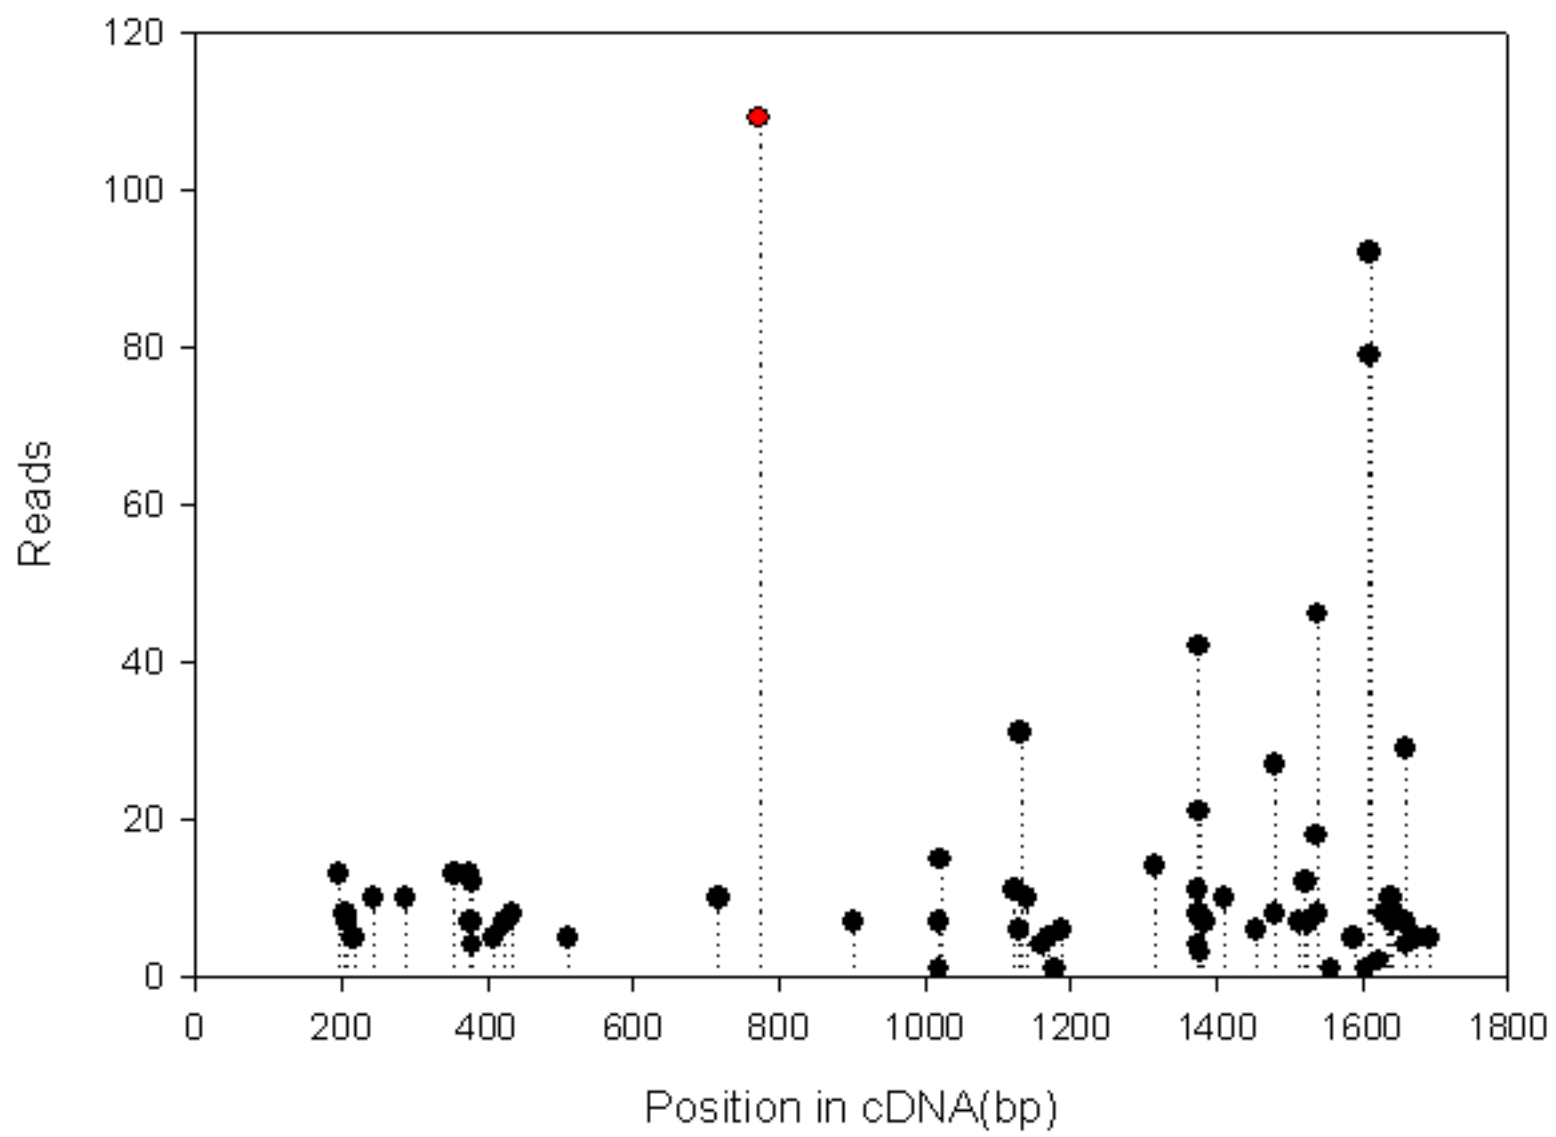

```

5' UUGGAGCUCCCUUCACUCCAAUAUAC 3'      Cs3g06390.1
   :.:.:.:.:.:.:.:.:.:.:.:.:.:.:
3' -AUCUCGAGGGAAGUUAGGUUU----- 5'    Csi-miR159
  
```

Csi-miR159b, target=Cs3g06390.1 gene=Cs3g06390  
 Category=1  
 Score=0  
 Cleavage Site=773

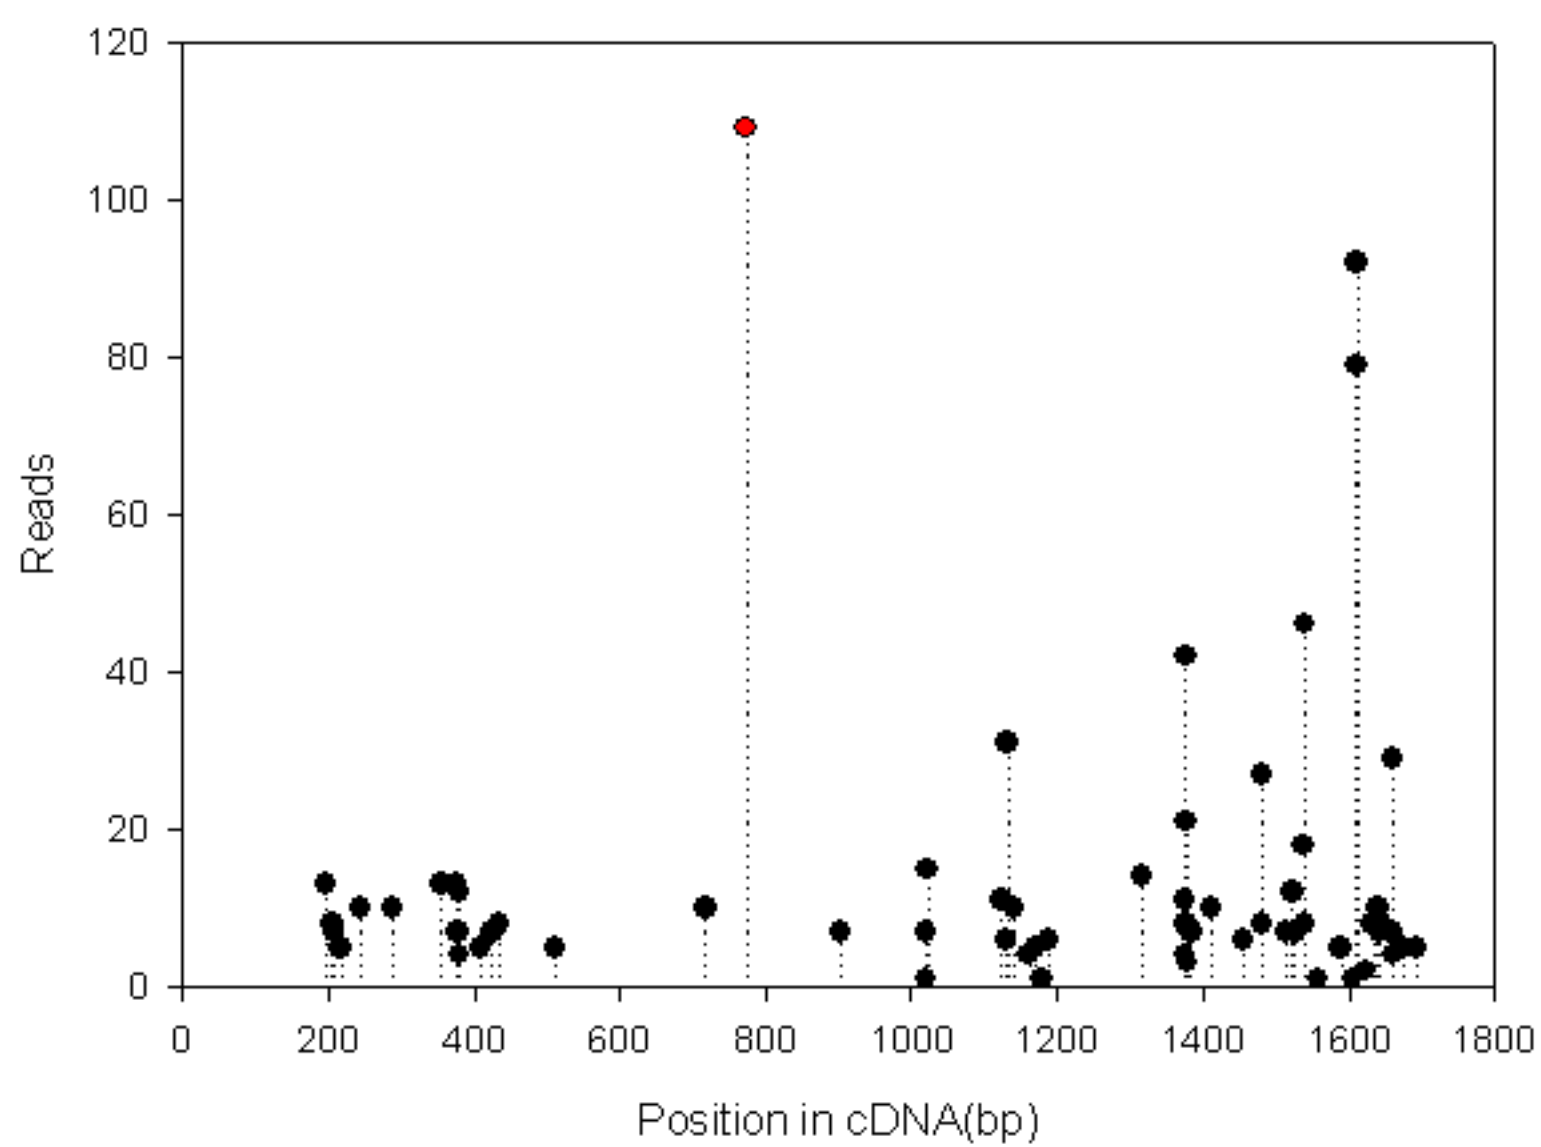

```

5' UUGGAGCUCCCUUCACUCCAAUAUAC 3'          Cs3g06390.1
   ::::::::::::::::::::::::::::
3' -ACCUCGAGGGAAGUGAGGUUA----- 5'       Csi-miR159b
  
```

Csi-miR160a-3p, target=Cs9g06430.1 gene=Cs9g06430  
 Category=3  
 Score=5  
 Cleavage Site=5175

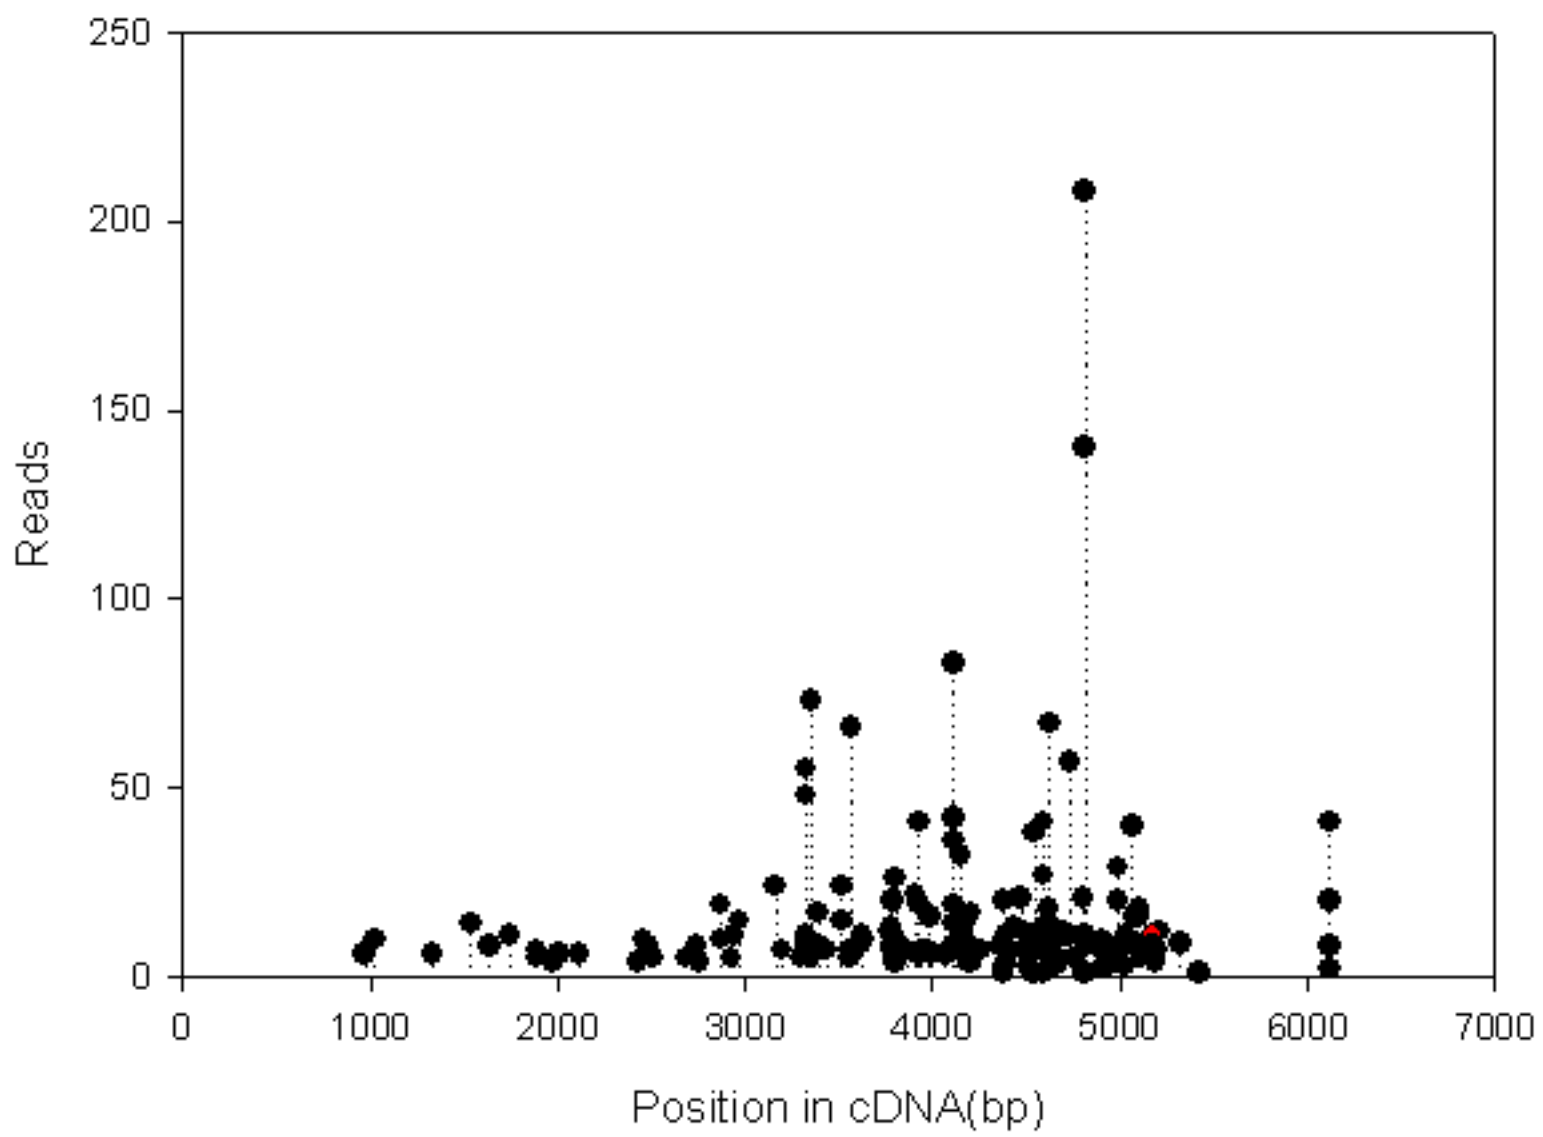

|    |                             |    |                |
|----|-----------------------------|----|----------------|
| 5' | UGAG-AUUGUCCUCAUACGUUCAACA  | 3' | Cs9g06430.1    |
|    | .. : :: :.:.:.:.:.:.:.:.:.: |    |                |
| 3' | AUACGUACCGAGGAGUAUGCG-----  | 5' | Csi-miR160a-3p |

Csi-miR162-3p.1, target=Orange1.1t00584.1 gene=Orange1.1t00584  
 Category=2  
 Score=2  
 Cleavage Site=3231

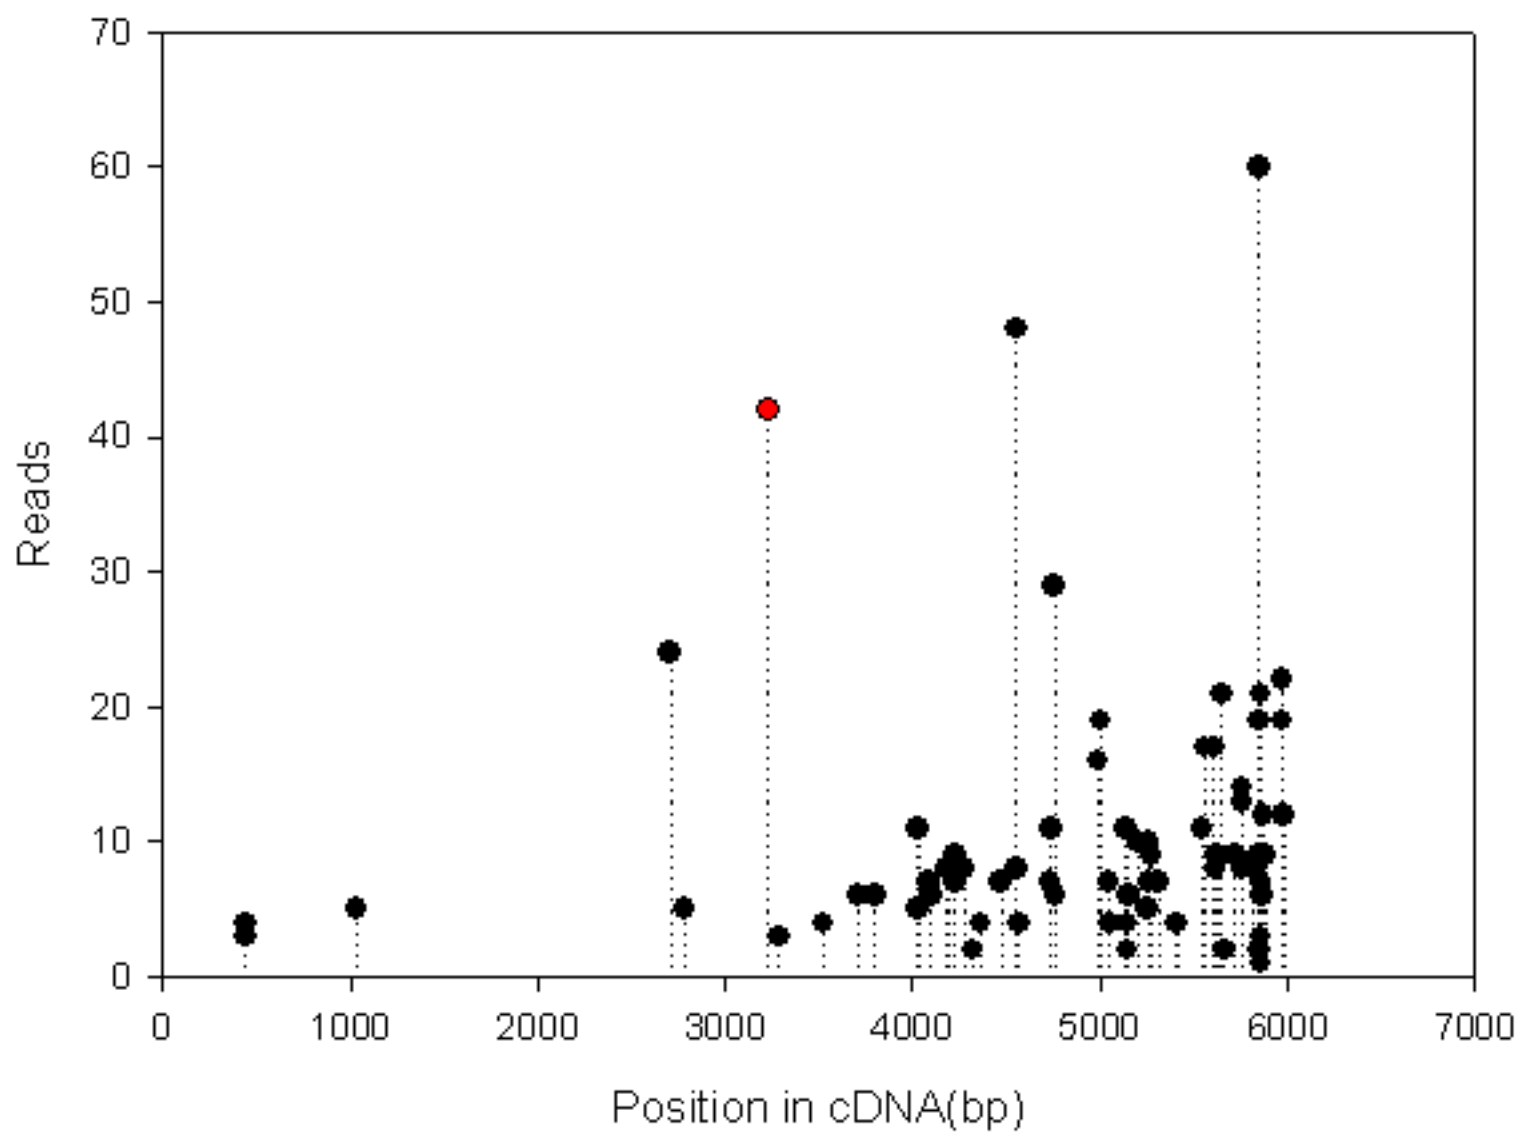

```

5' GCUGGAUGCAGAGGUGUUAUCGAUGU 3'      Orange1.1t00584.1
   :::::::::::::::::::: ::::::::::::
3' -GACCUACGUCUCCA-AAUAGCU--- 5'      Csi-miR162-3p.1
  
```

Csi-miR162-3p.2, target=Orange1.1t00584.1 gene=Orange1.1t00584  
 Category=2  
 Score=2  
 Cleavage Site=3231

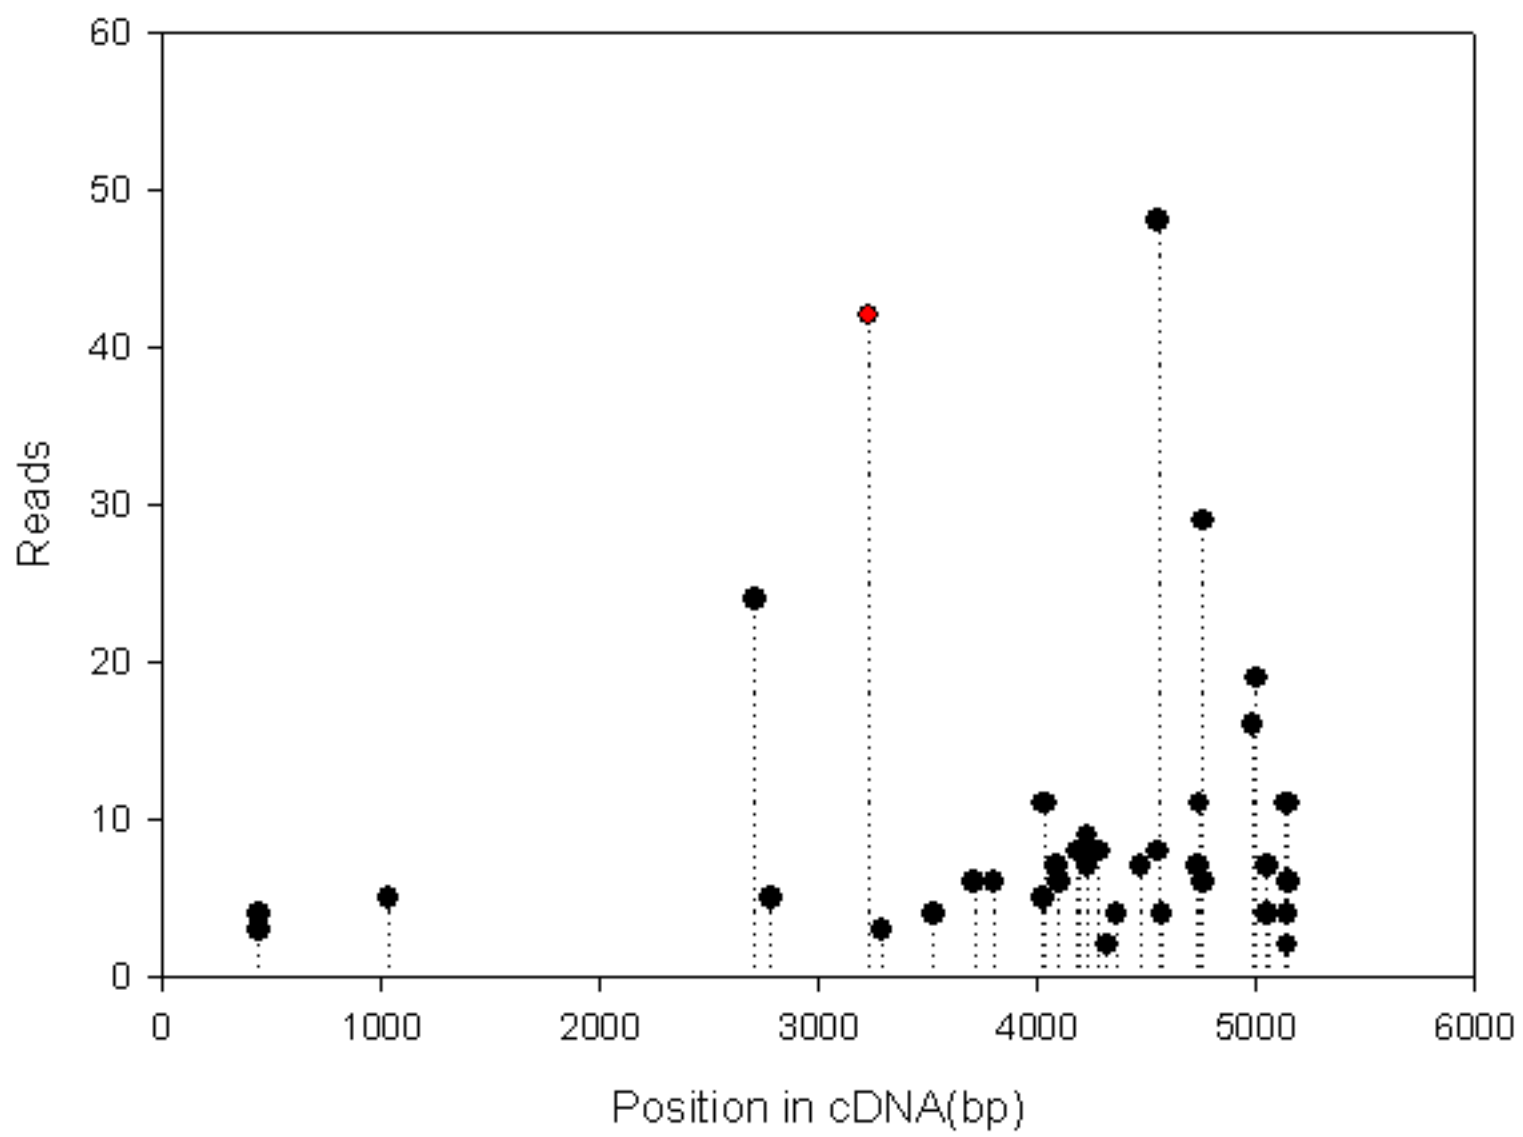

```

5' GCUGGAUGCAGAGGUGUUAUCGAUGU 3'      Orange1.1t00584.1
   :::::::::::::::::::: :::::
3' -GACCUACGUCUCCA-AAUAG----- 5'      Csi-miR162-3p.2
  
```

Csi-miR164, target=Cs5g10870.1 gene=Cs5g10870  
 Category=1  
 Score=3.5  
 Cleavage Site=1062

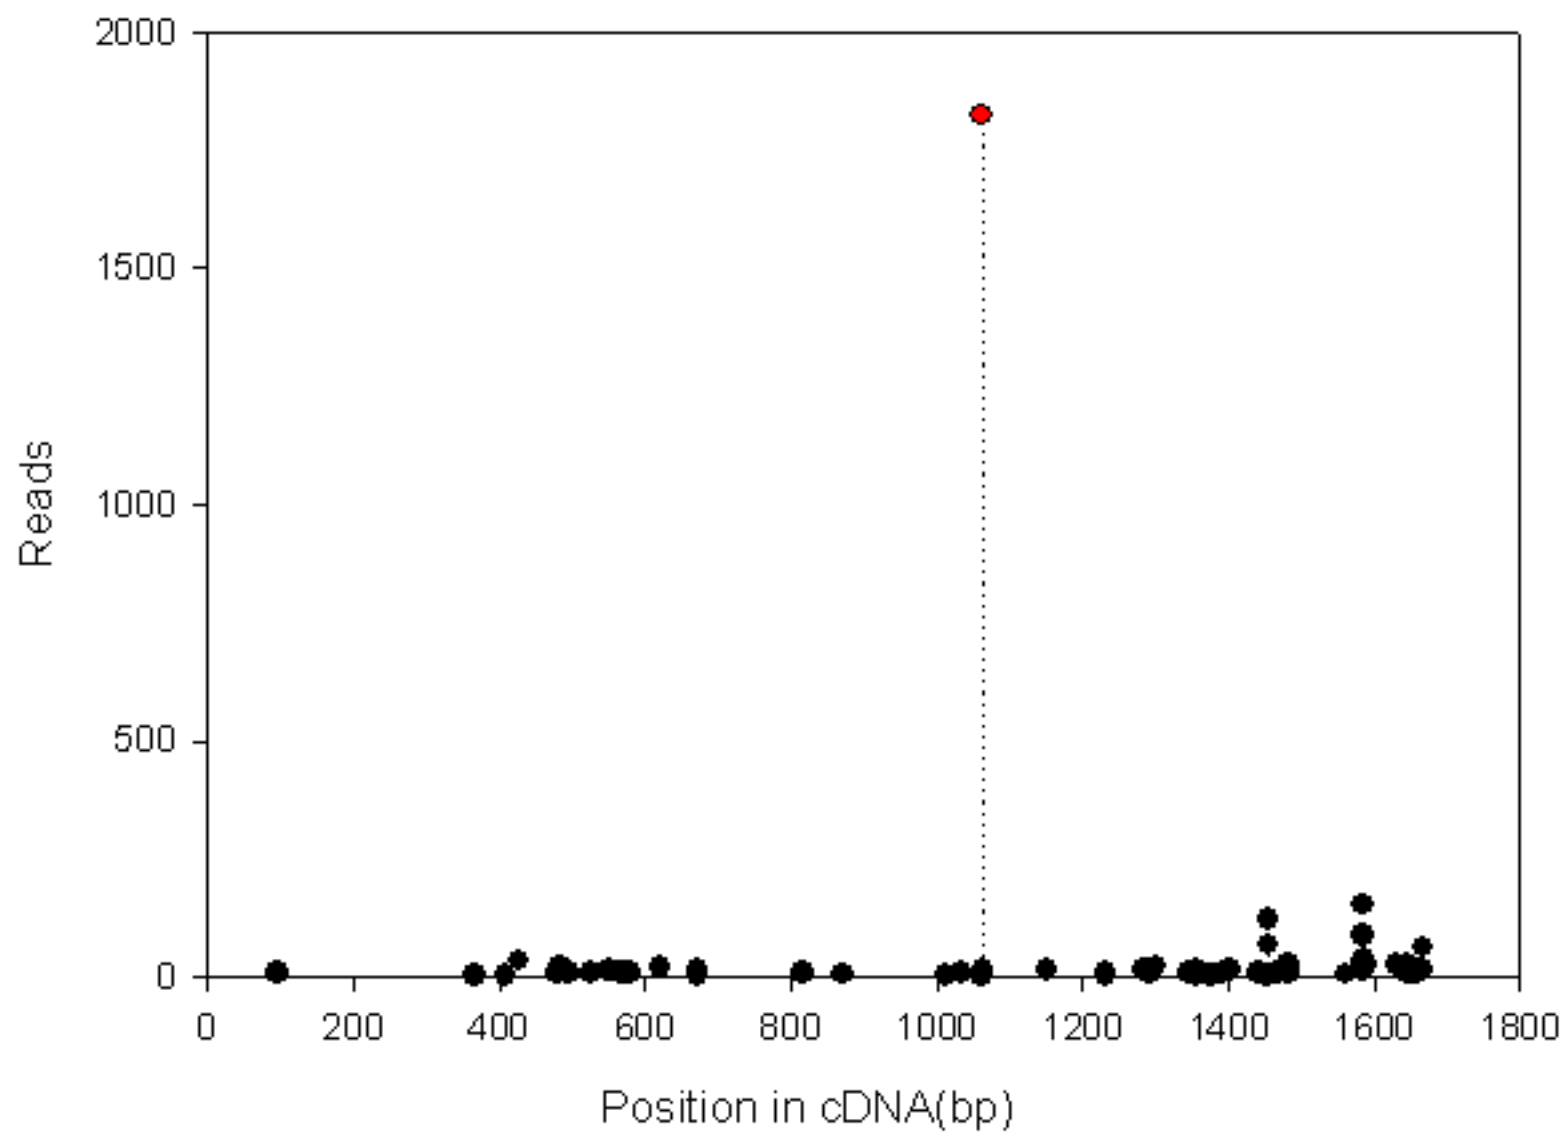

```

5' GCUUACGUGUCCUGCUUCUCCAAUUC 3'      Cs5g10870.1
   . . . . .
3' -ACGUGCACGGGACGAAGAGGU---- 5'      Csi-miR164

```

Csi-miR166a.1, target=Cs2g09770.1 gene=Cs2g09770  
 Category:3  
 Score=4  
 Cleavage Site=1058

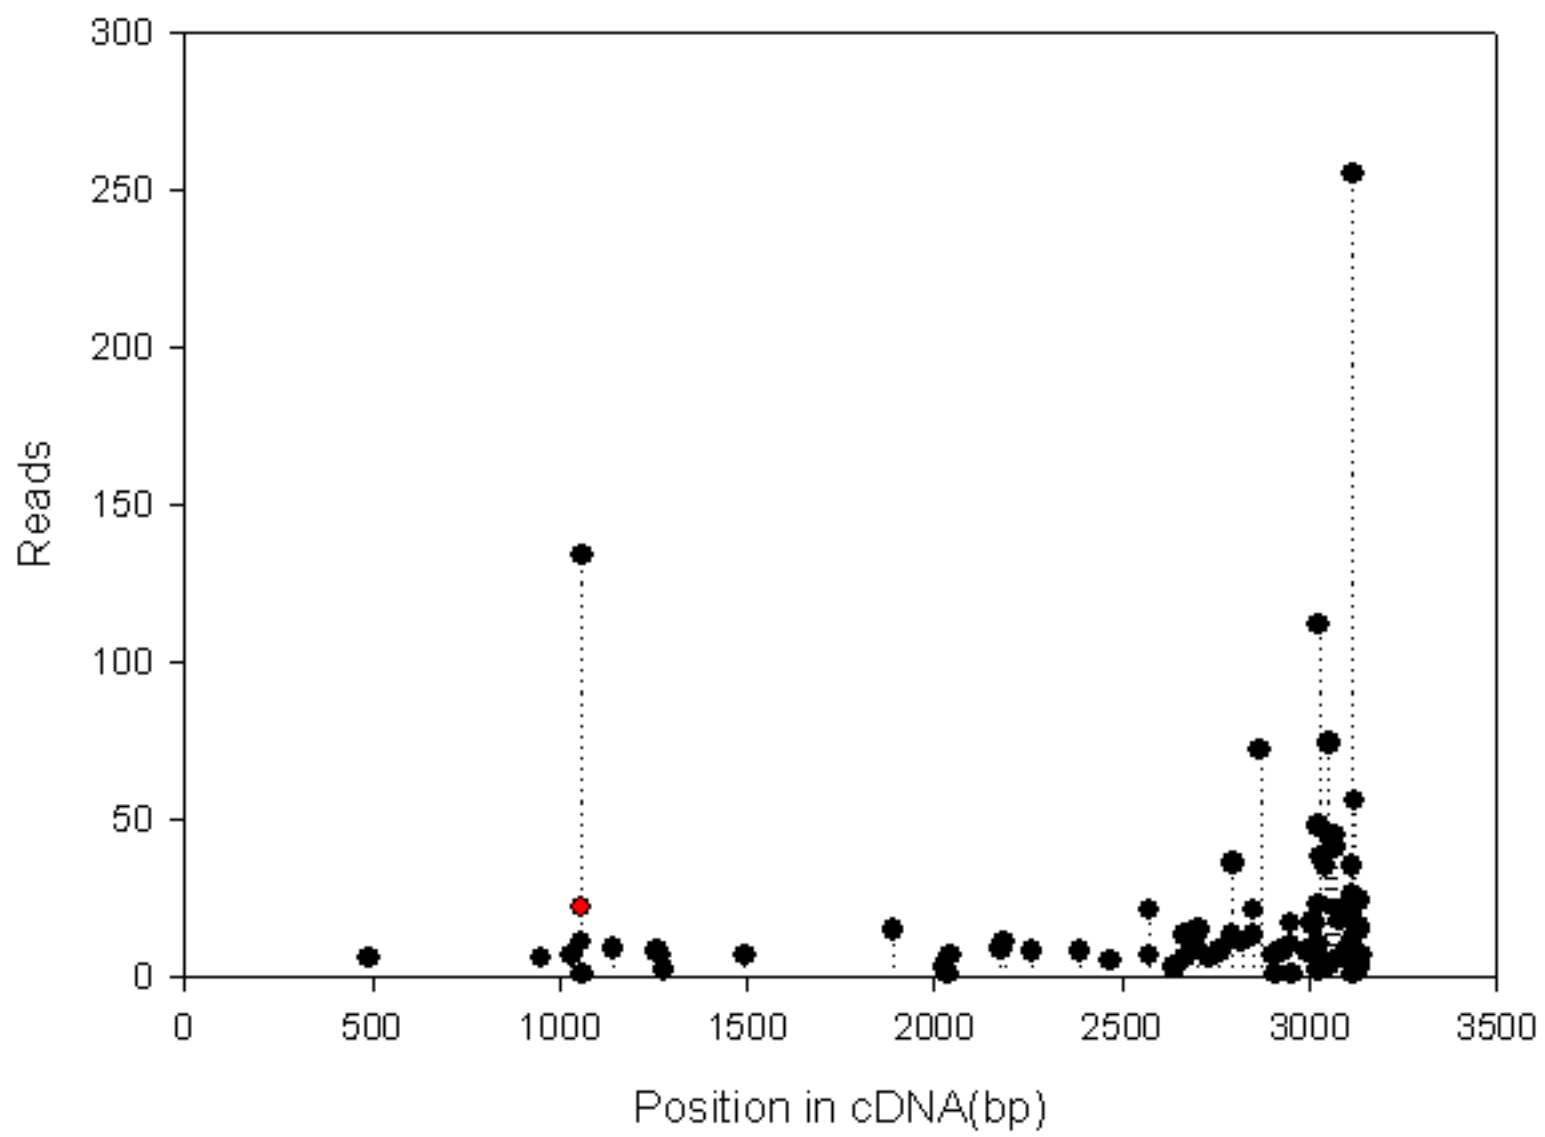

```

5' AUUGGGAUGAAGCCUGGUCGGAUUC 3'      Cs2g09770.1
   ::::::::::::::::::::.
3' CCCCCUACUUCGGACCAGGCU---- 5'      Csi-miR166a.1
  
```

Csi-miR166a.1, target=Cs8g16510.1 gene=Cs8g16510  
 Category=1  
 Score=4  
 Cleavage Site=1434

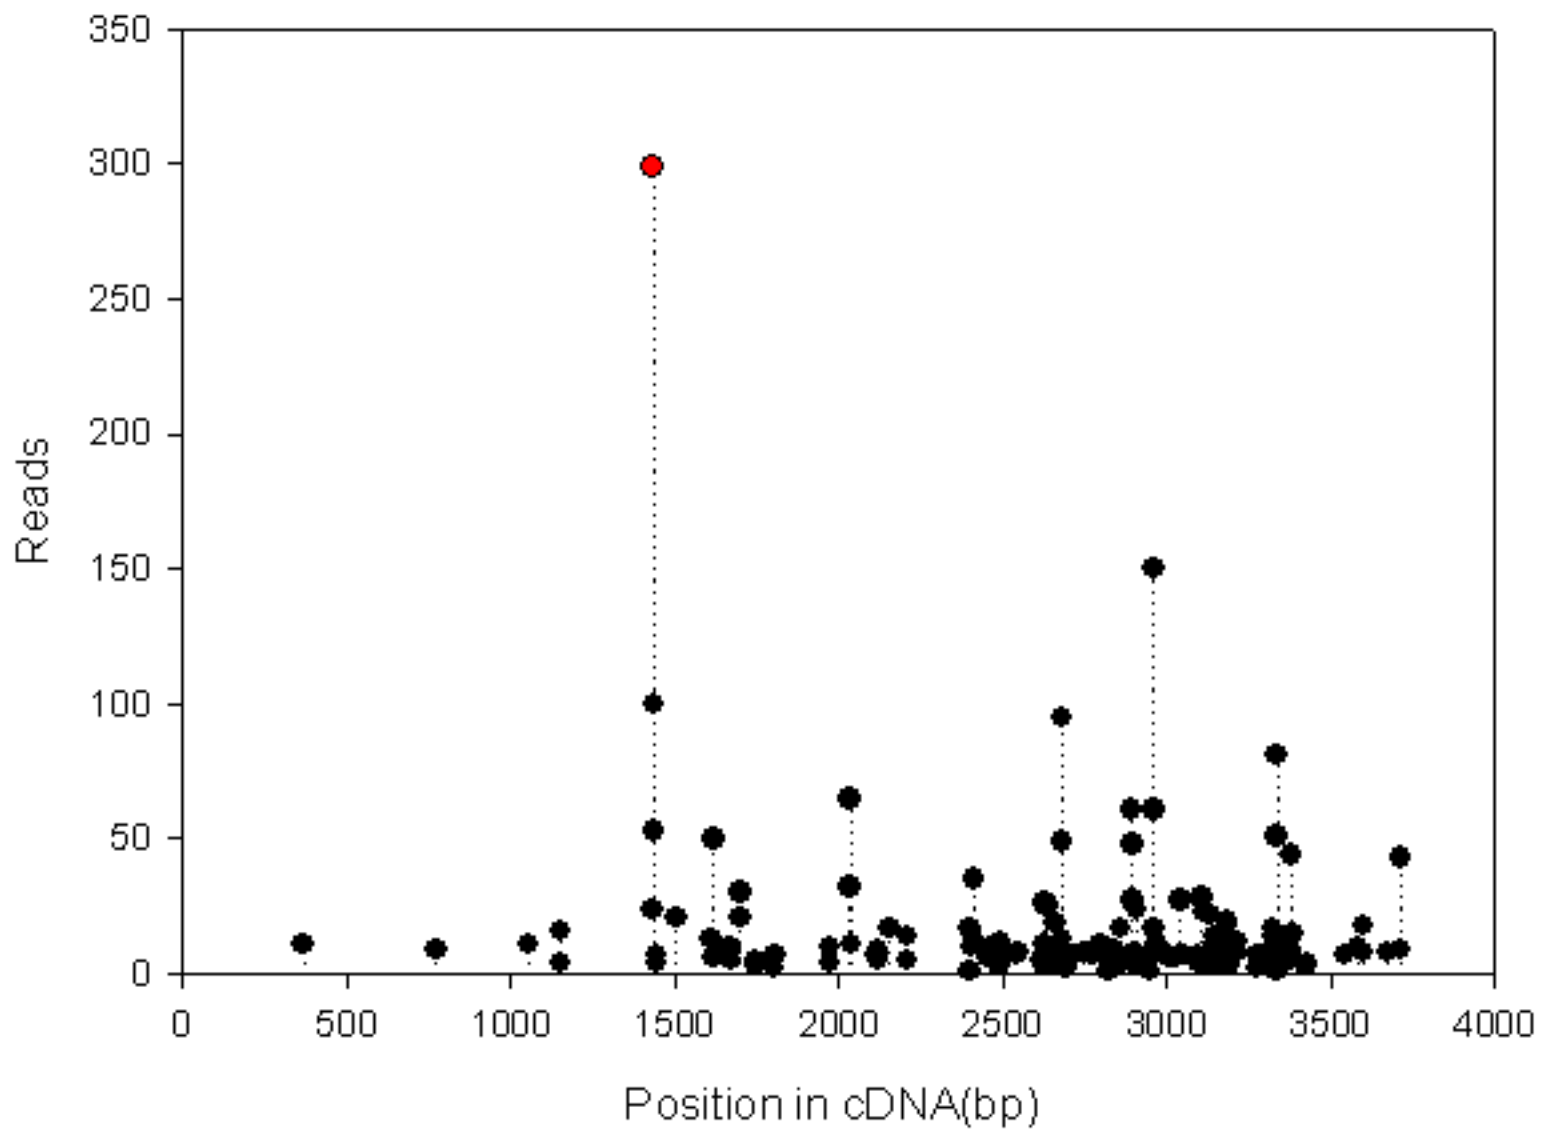

```

5' CCUGGGAUGAAGCCUGGUCCGGAUUC 3'      Cs8g16510.1
   .....
3' CCCCUCUACUUCGGACCAGGCU----- 5'    Csi-miR166a.1

```



Csi-miR166a.2, target=Cs2g09770.1 gene=Cs2g09770  
 Category:3  
 Score=3  
 Cleavage Site=1058

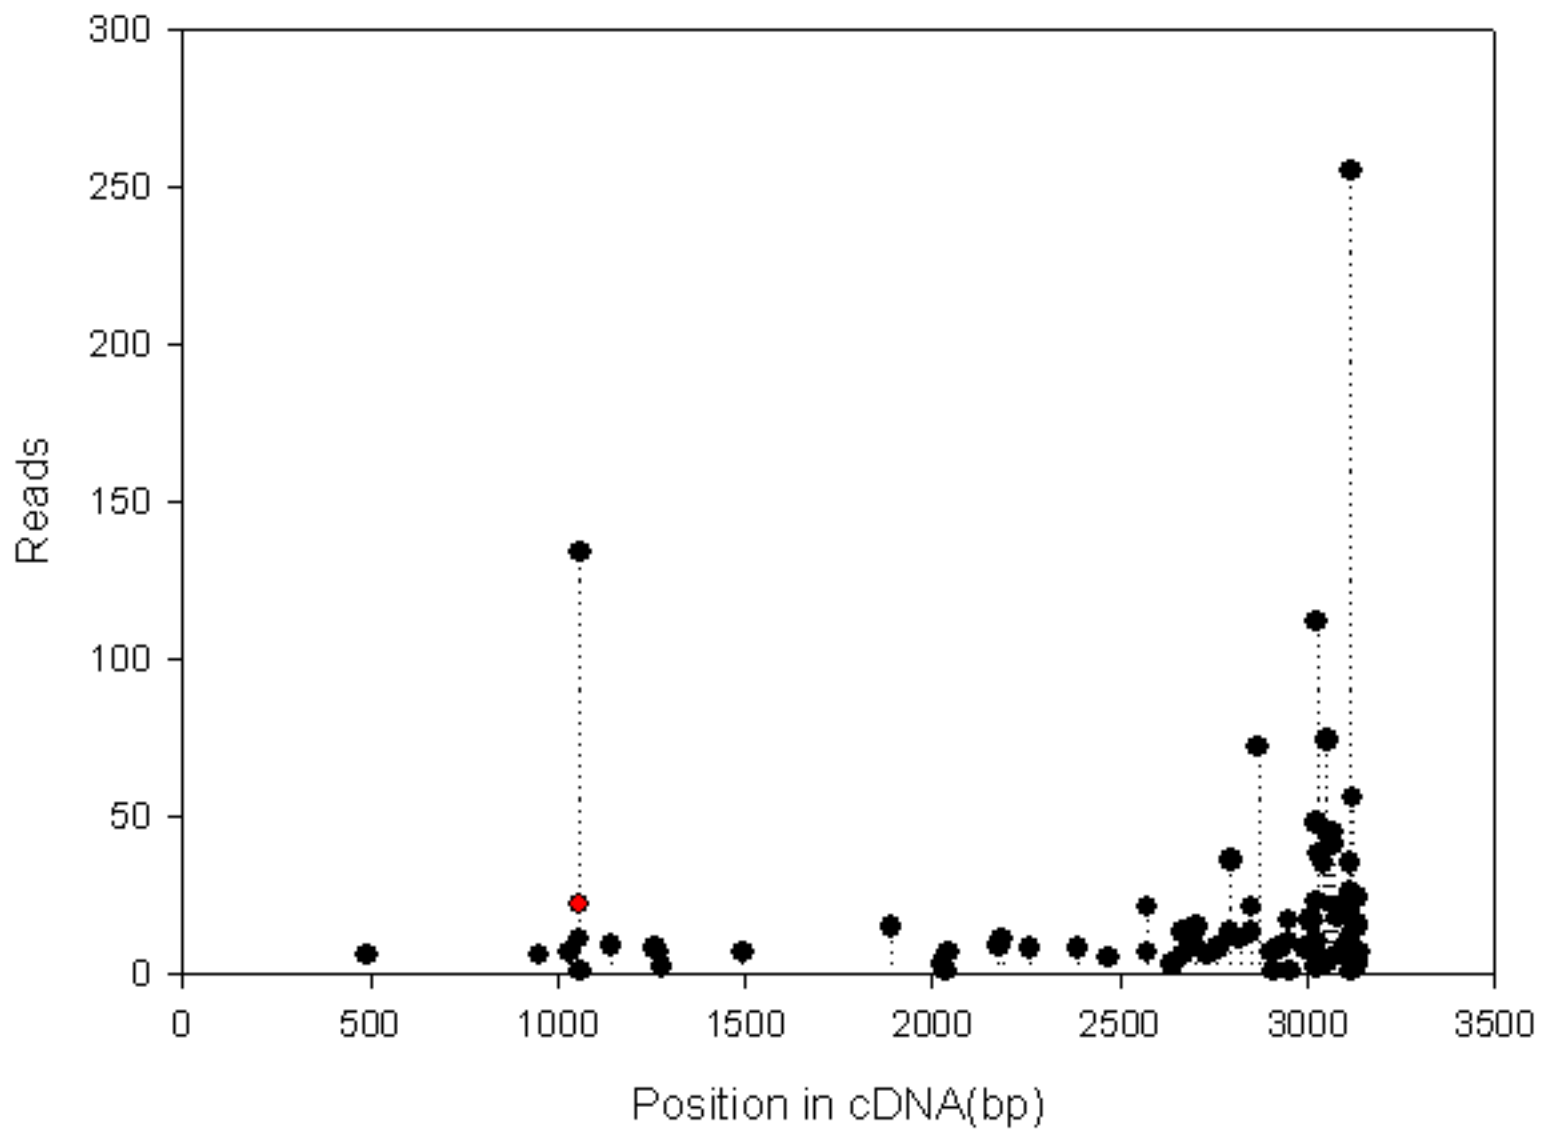

```

5' AUUGGGAUGAAGCCUGGUCGGAUUC 3'      Cs2g09770.1
   : : : : : : : : : : : : : : : :
3' -CCCCUACUUCGGACCAGGCU----- 5'      Csi-miR166a.2
  
```

Csi-miR166a.2, target=Cs8g16510.1 gene=Cs8g16510  
 Category=1  
 Score=3  
 Cleavage Site=1434

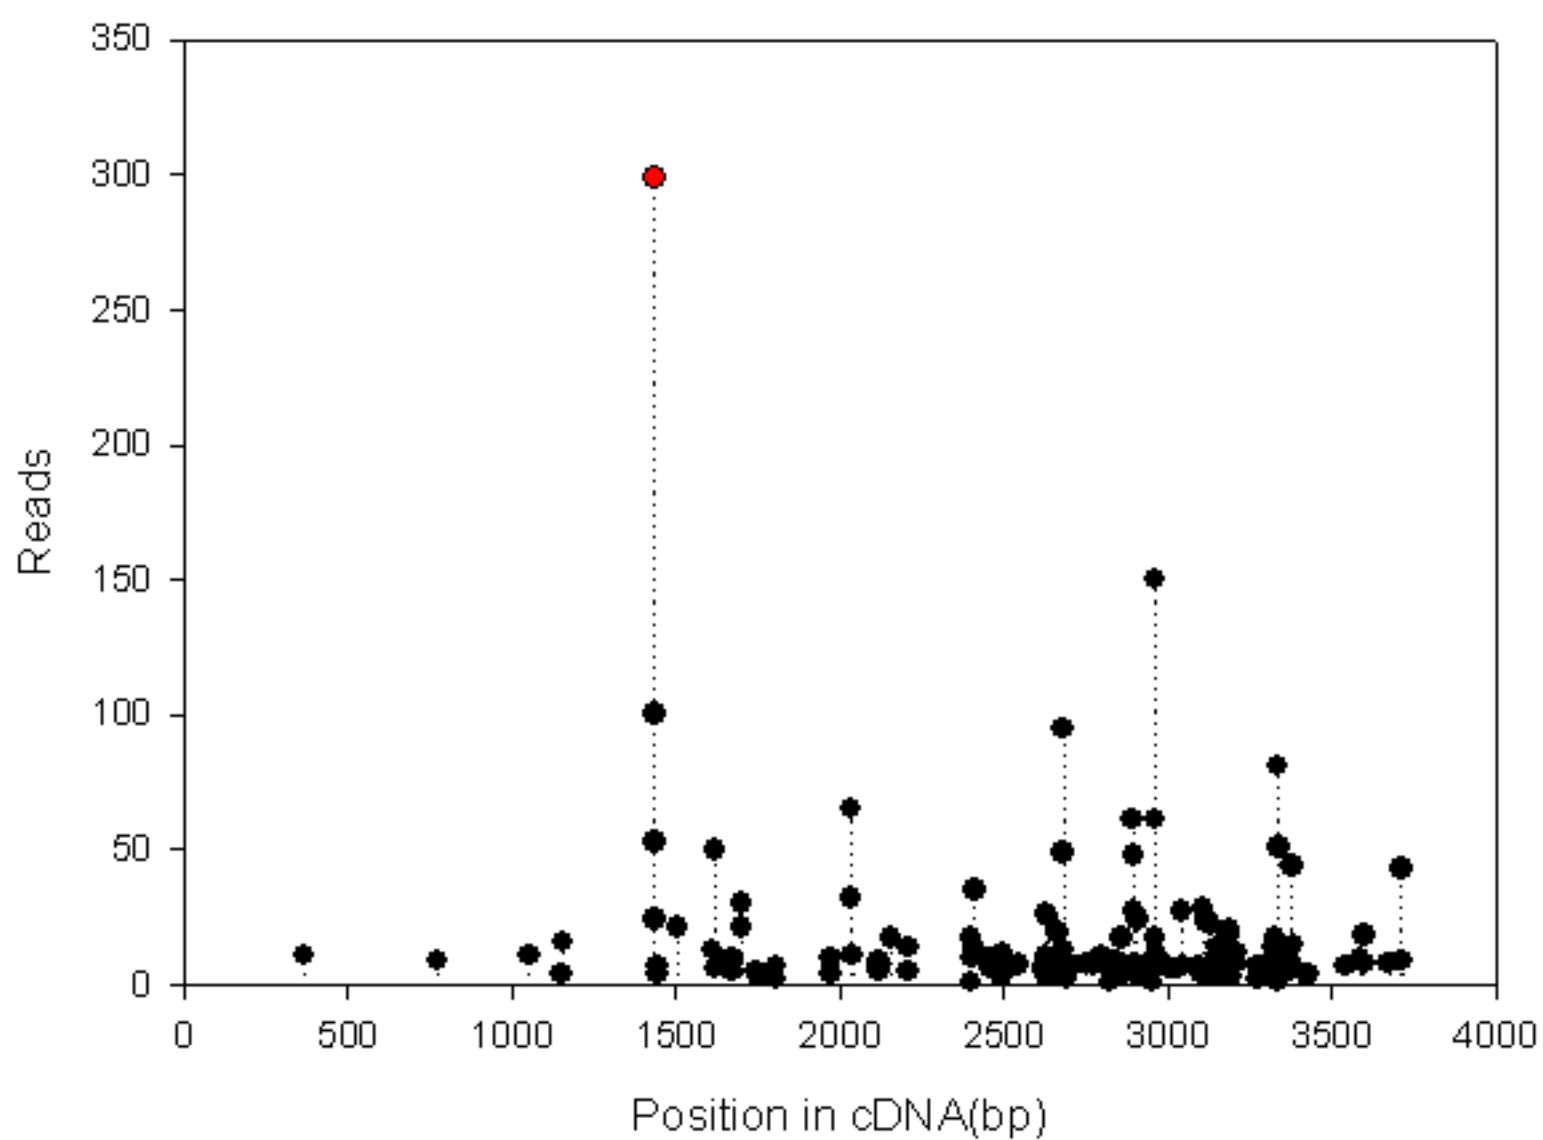

```

5' CCUGGGAUGAAGCCUGGUCCGGAUUC 3'      Cs8g16510.1
   .....
3' -CCCCUUACUUCGGACCAGGCU----- 5'    Csi-miR166a.2
  
```

Csi-miR166b, target=Cs2g09770.1 gene=Cs2g09770  
 Category:3  
 Score=2.5  
 Cleavage Site=1058

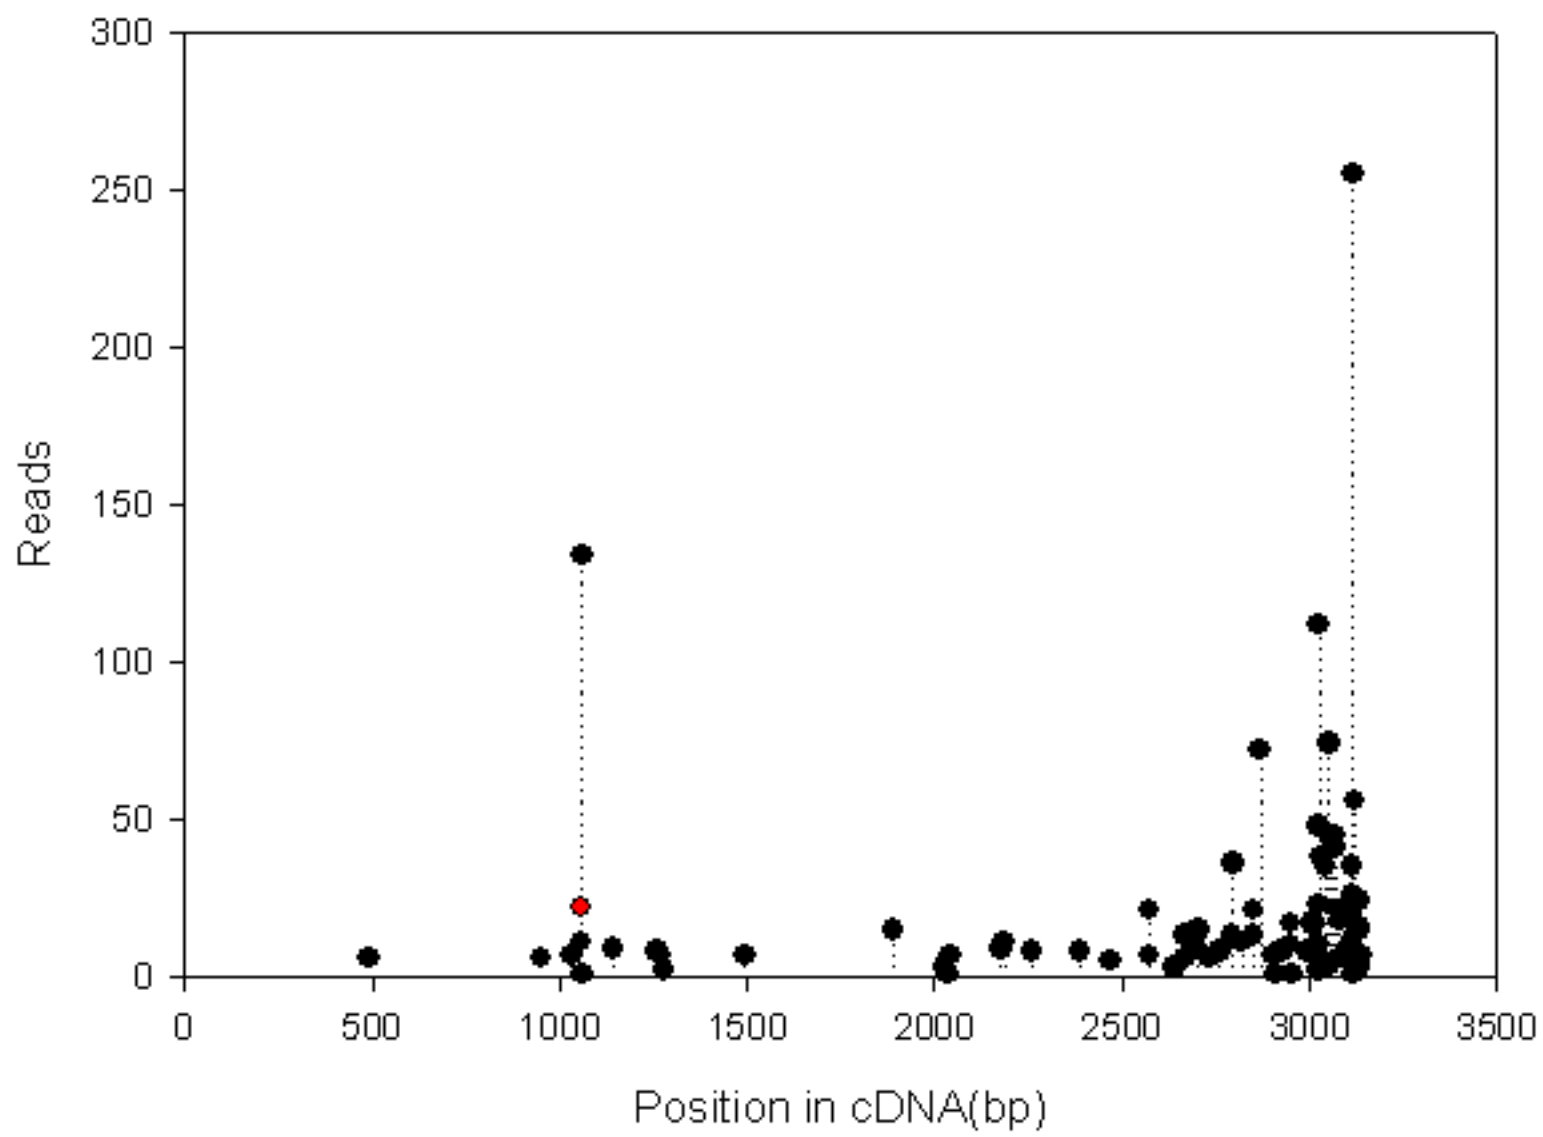

```

5' AUUGGGAUGAAGCCUGGUC CGGAUUC 3'      Cs2g09770.1
   . . . . .
3' -GCCCUUACUUCGGACCAGGCU---- 5'      Csi-miR166b
  
```

Csi-miR166b, target=Cs8g16510.1 gene=Cs8g16510  
Category=1  
Score=2  
Cleavage Site=1434

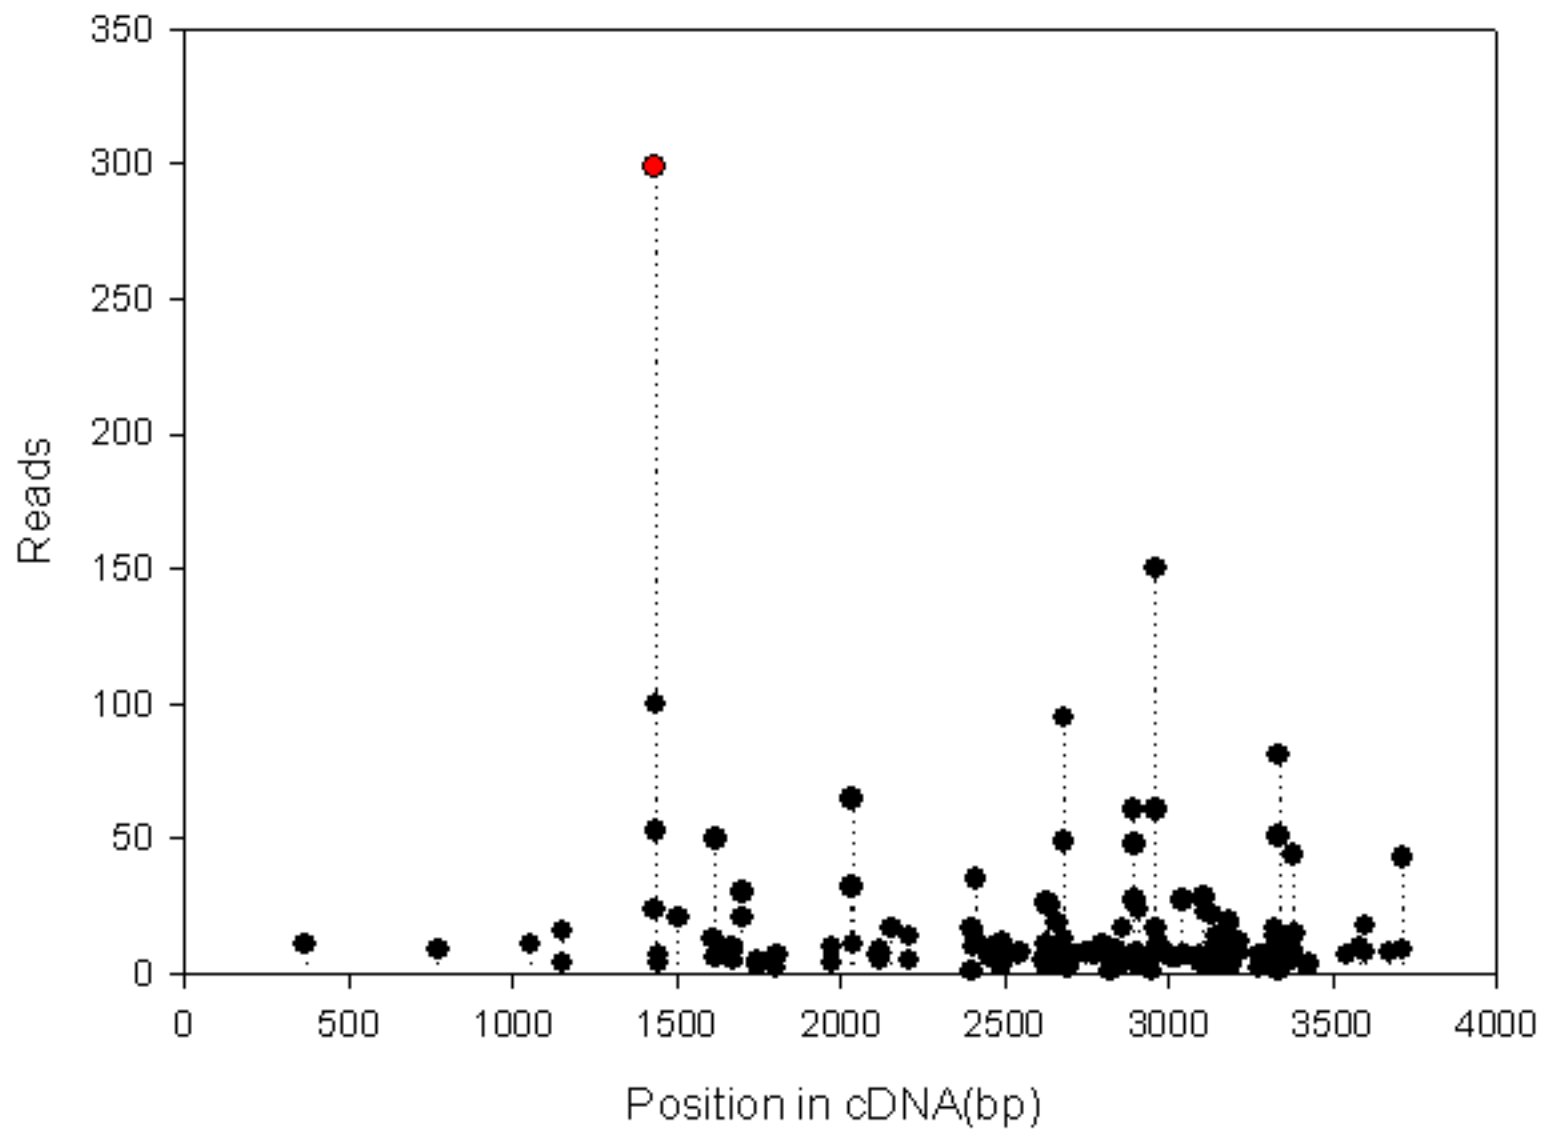

```
5' CCUGGGAUGAAGCCUGGUCCGGAUUC 3' Cs8g16510.1
   : : : : : : : : : : : : : : :
3' -GCCCUUACUUCGGACCAGGCU----- 5' Csi-miR166b
```

Csi-miR166c.1, target=Cs2g09770.1 gene=Cs2g09770  
 Category:2  
 Score=1  
 Cleavage Site=1060

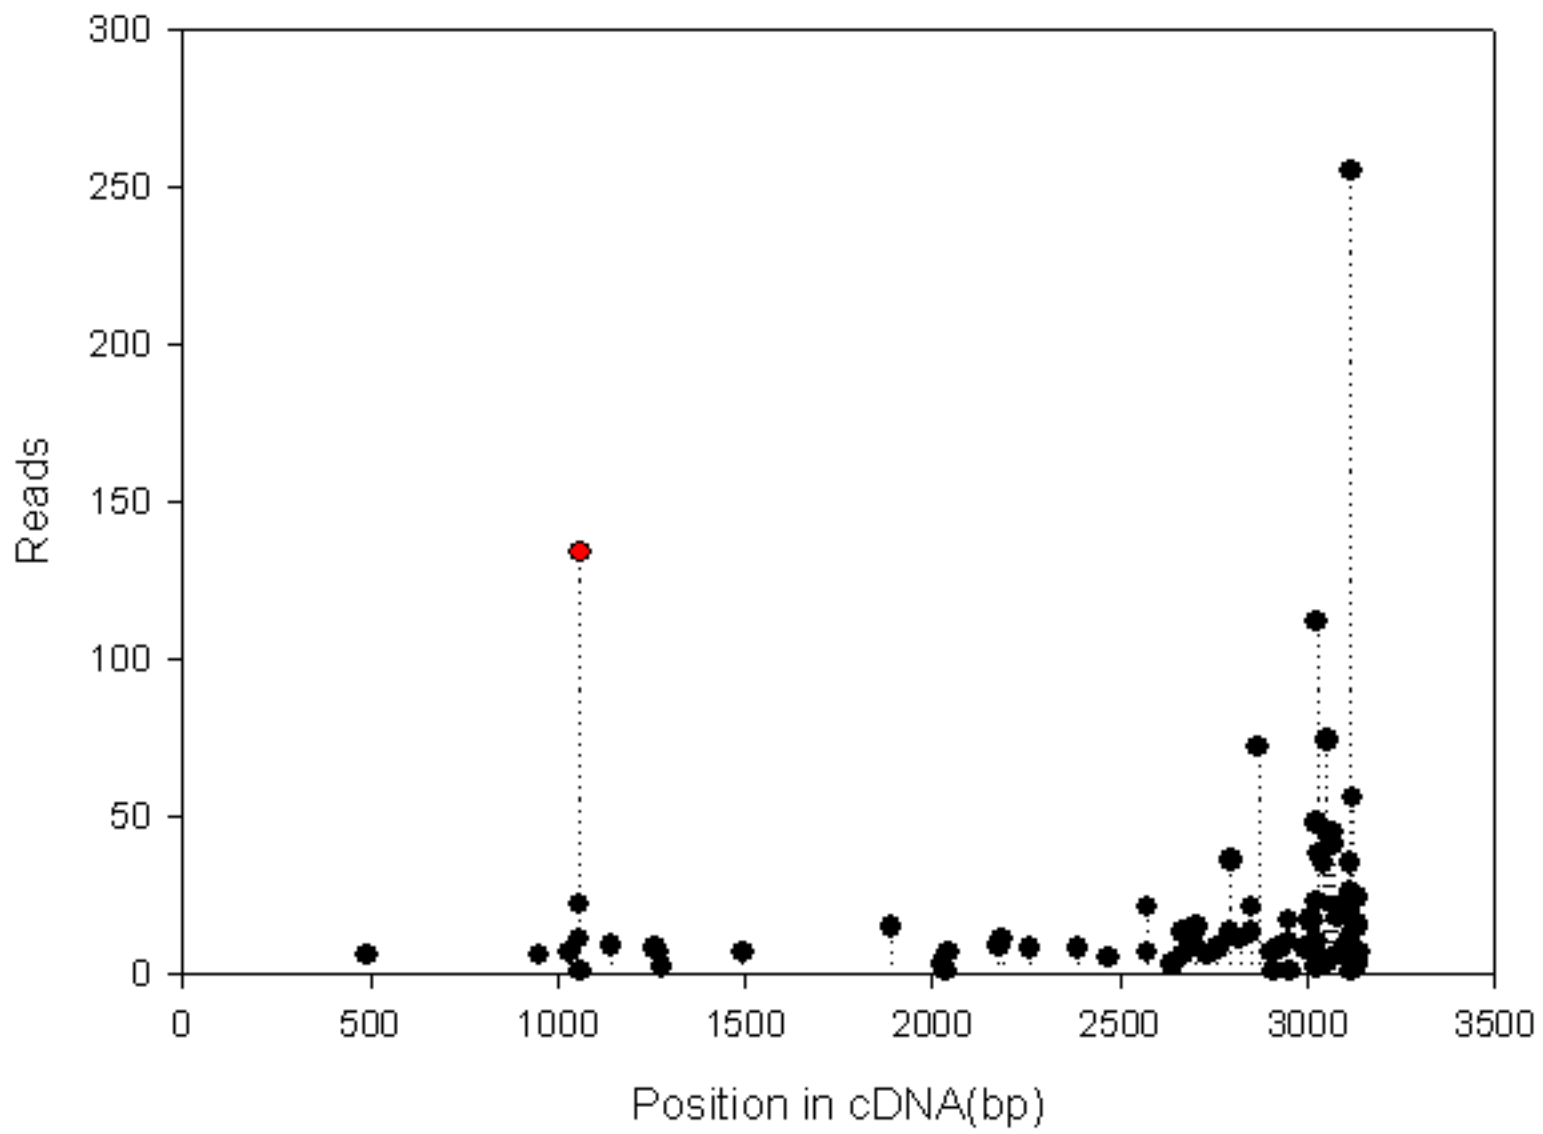

|                                  |               |
|----------------------------------|---------------|
| 5' UGGGAUGAAGCCUGGUCCGGAUUCUA 3' | Cs2g09770.1   |
| .....                            |               |
| 3' -CCUACUUCGGACCAGGCU----- 5'   | Csi-miR166c.1 |

Csi-miR166c.1, target=Cs8g16510.1 gene=Cs8g16510  
 Category=1  
 Score=1  
 Cleavage Site=1434



```

5' CCUGGGAUGAAGCCUGGUCCGGAUUC 3'      Cs8g16510.1
   .....
3' ---CCUACUUCGGACCAGGCU--- 5'      Csi-miR166c.1
  
```

Csi-miR166c.2, target=Cs2g09770.1 gene=Cs2g09770  
 Category:2  
 Score=1  
 Cleavage Site=1060



```

5' UGGGAUGAAGCCUGGUCGGAUUCUA 3'      Cs2g09770.1
   .....
3' --CUUACUUCGGACCAGGCU----- 5'      Csi-miR166c.2
  
```

Csi-miR166c.2, target=Cs8g16510.1 gene=Cs8g16510  
 Category=1  
 Score=1  
 Cleavage Site=1434



```

5' CCUGGGAUGAAGCCUGGUCCGGAUUC 3'          Cs8g16510.1
   .....
3' ----CUUACUUCGGACCAGGCU---- 5'          Csi-miR166c.2
  
```



Csi-miR166c.3, target=Cs2g09770.1 gene=Cs2g09770  
 Category:2  
 Score=2  
 Cleavage Site=1060



```

5' UGGGAUGAAGCCUGGUCGGAUUCUA 3'      Cs2g09770.1
   .....
3' CCCUUACUUCGGACCAGGCU----- 5'      Csi-miR166c.3

```

Csi-miR166c.3, target=Cs8g16510.1 gene=Cs8g16510  
 Category=1  
 Score=2  
 Cleavage Site=1434



```

5' CCUGGGAUGAAGCCUGGUCCGGAUUC 3'          Cs8g16510.1
   : : : : : : : : : : : : : : : : : :
3' --CCCUUACUUCGGACCAGGCU----- 5'      Csi-miR166c.3
  
```

Csi-miR166c.4, target=Cs2g09770.1 gene=Cs2g09770  
 Category:2  
 Score=3.5  
 Cleavage Site=1060

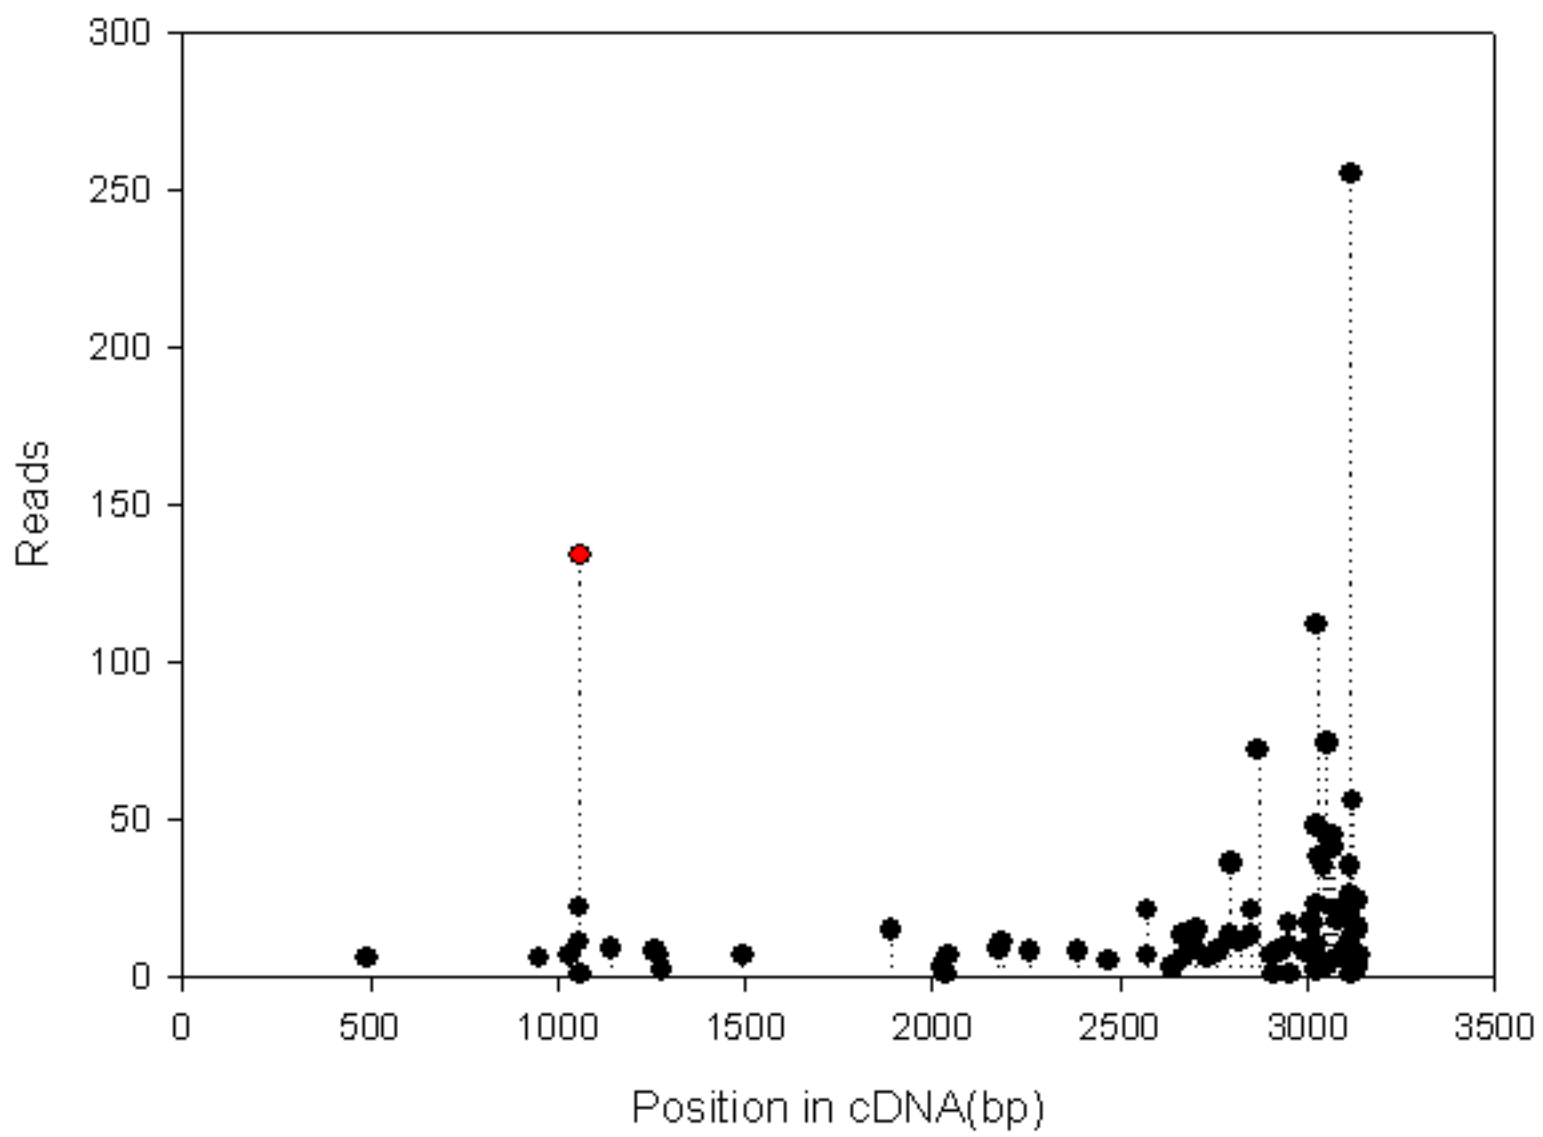

```

5' UGGGAUGAAGCCUGGUCCGGAUUCUA 3'      Cs2g09770.1
   ::::::::::::::::::::.
3' CCCUACUUCGGACCAGGCUC----- 5'      Csi-miR166c.4

```

Csi-miR166c.4, target=Cs8g16510.1 gene=Cs8g16510  
 Category=1  
 Score=3.5  
 Cleavage Site=1434

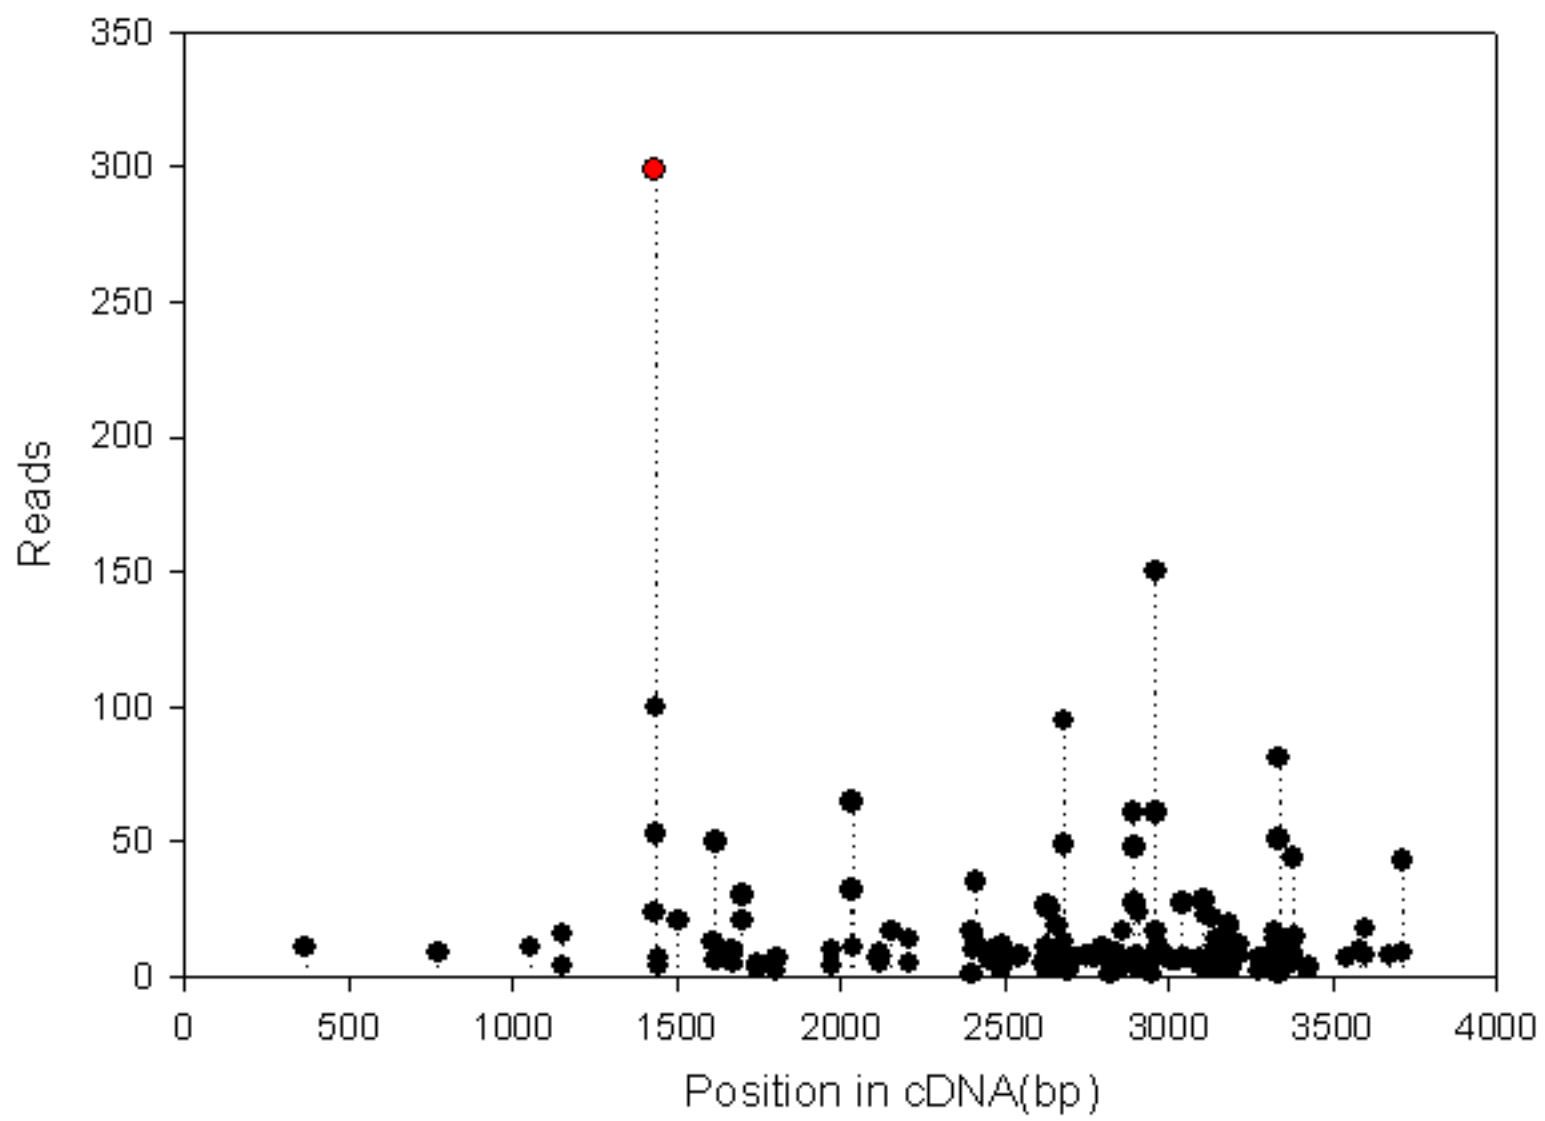

```

5' CCUGGGAUGAAGCCUGGUCGGAUUC 3'          Cs8g16510.1
   .....
3' --CCCUUACUUCGGACCAGGCUC--- 5'         Csi-miR166c.4
  
```

Csi-miR166c.5, target=Cs2g09770.1 gene=Cs2g09770  
 Category:2  
 Score=2.5  
 Cleavage Site=1060



|                                   |               |
|-----------------------------------|---------------|
| 5' UGGGAUGAAGCCUGGUCGGAUUCUA 3'   | Cs2g09770.1   |
| : : : : : : : : : : : : : : : : . |               |
| 3' -CCUACUUCGGACCAGGCUC----- 5'   | Csi-miR166c.5 |

Csi-miR166c.5, target=Cs8g16510.1 gene=Cs8g16510  
 Category=1  
 Score=2.5  
 Cleavage Site=1434



```

5' CCUGGGAUGAAGCCUGGUCCGGAUUC 3'      Cs8g16510.1
   .....
3' ---CCUACUUCGGACCAGGCUC--- 5'      Csi-miR166c.5
  
```

Csi-miR166d.1, target=Cs2g09770.1 gene=Cs2g09770  
 Category:3  
 Score=3  
 Cleavage Site=1058



```

5' AUUGGGAUGAAGCCUGGUCGGAUUC 3'      Cs2g09770.1
   : .....
3' UUCCCUUACUUCGGACCAGGCU----- 5'    Csi-miR166d.1
  
```

Csi-miR166d.1, target=Cs8g16510.1 gene=Cs8g16510  
 Category=1  
 Score=4  
 Cleavage Site=1434

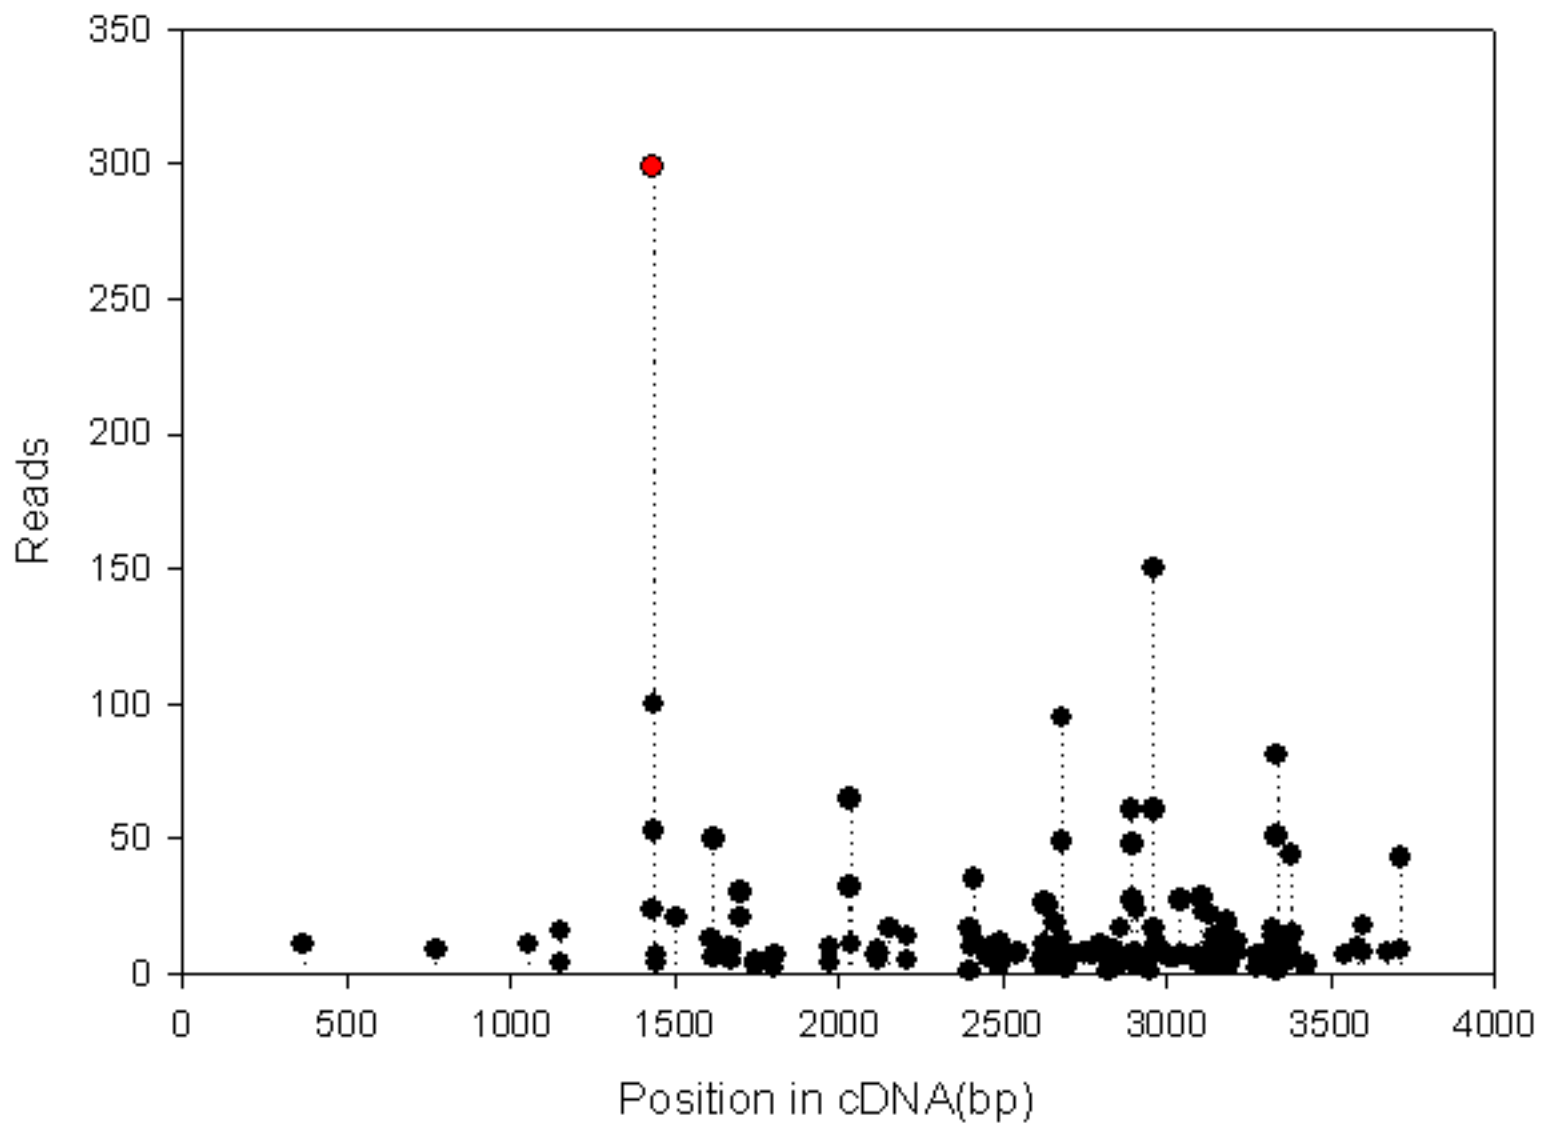

5' CCUGGGAUGAAGCCUGGUCCGGAUUC 3'  
 ::::::::::::::::::::.  
 3' UUCCCUUACUUCGGACCAGGCU---- 5'

Cs8g16510.1  
 csi-miR166d.1



Csi-miR166d.2, target=Cs2g09770.1 gene=Cs2g09770  
 Category:3  
 Score=3  
 Cleavage Site=1058



```

5' AUUGGGAUGAAGCCUGGUCGGAUUC 3'      Cs2g09770.1
   : : : : : : : : : : : : : : : :
3' -UCCCUUACUUCGGACCAGGCU---- 5'      Csi-miR166d.2
  
```

Csi-miR166d.2, target=Cs8g16510.1 gene=Cs8g16510  
 Category=1  
 Score=3  
 Cleavage Site=1434



```

5' CCUGGGAUGAAGCCUGGUCGGAUUC 3'          Cs8g16510.1
   : : : : : : : : : : : : : : : :
3' -UCCCUUACUUCGGACCAGGCU----- 5'      Csi-miR166d.2

```

Csi-miR166g.1, target=Cs2g09770.1 gene=Cs2g09770  
 Category:2  
 Score=4.5  
 Cleavage Site=1060

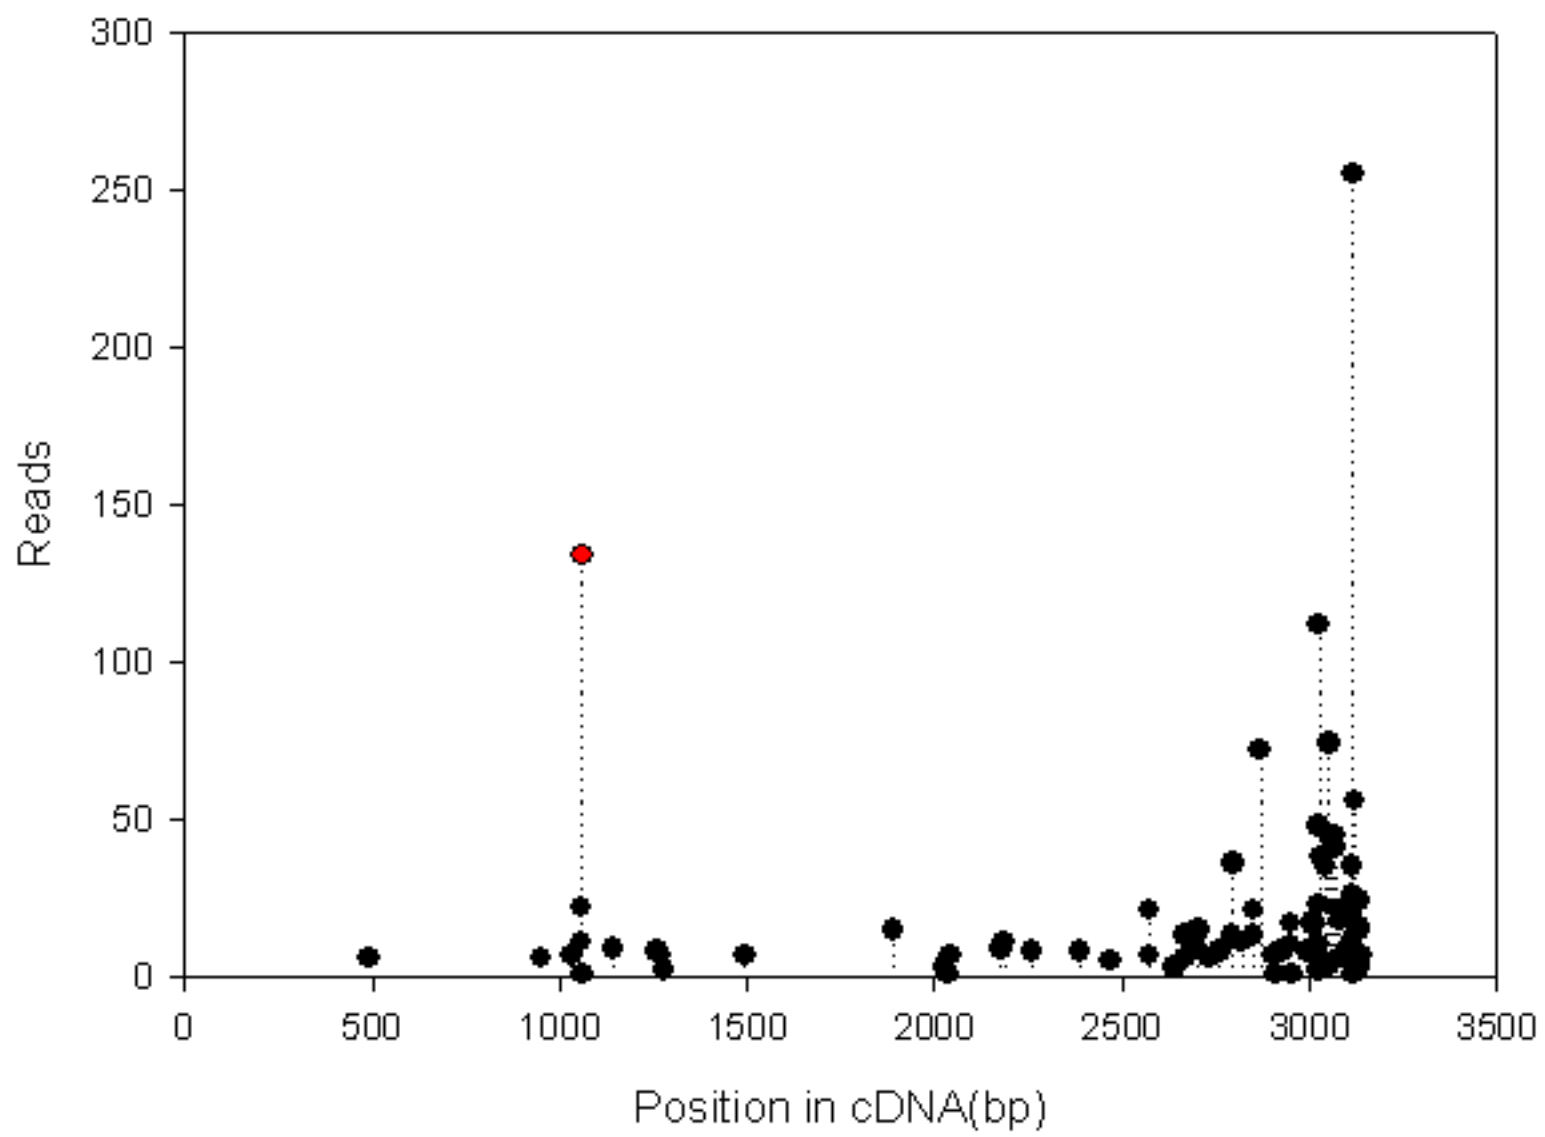

```

5' UGGGAUGAAGCCUGGUCCGGAUUCUA 3'      Cs2g09770.1
   .....
3' -CCUACUUCGGACCAGGCUCU----- 5'    Csi-miR166g.1
  
```

Csi-miR166g.1, target=Cs8g16510.1 gene=Cs8g16510  
 Category=1  
 Score=4.5  
 Cleavage Site=1434

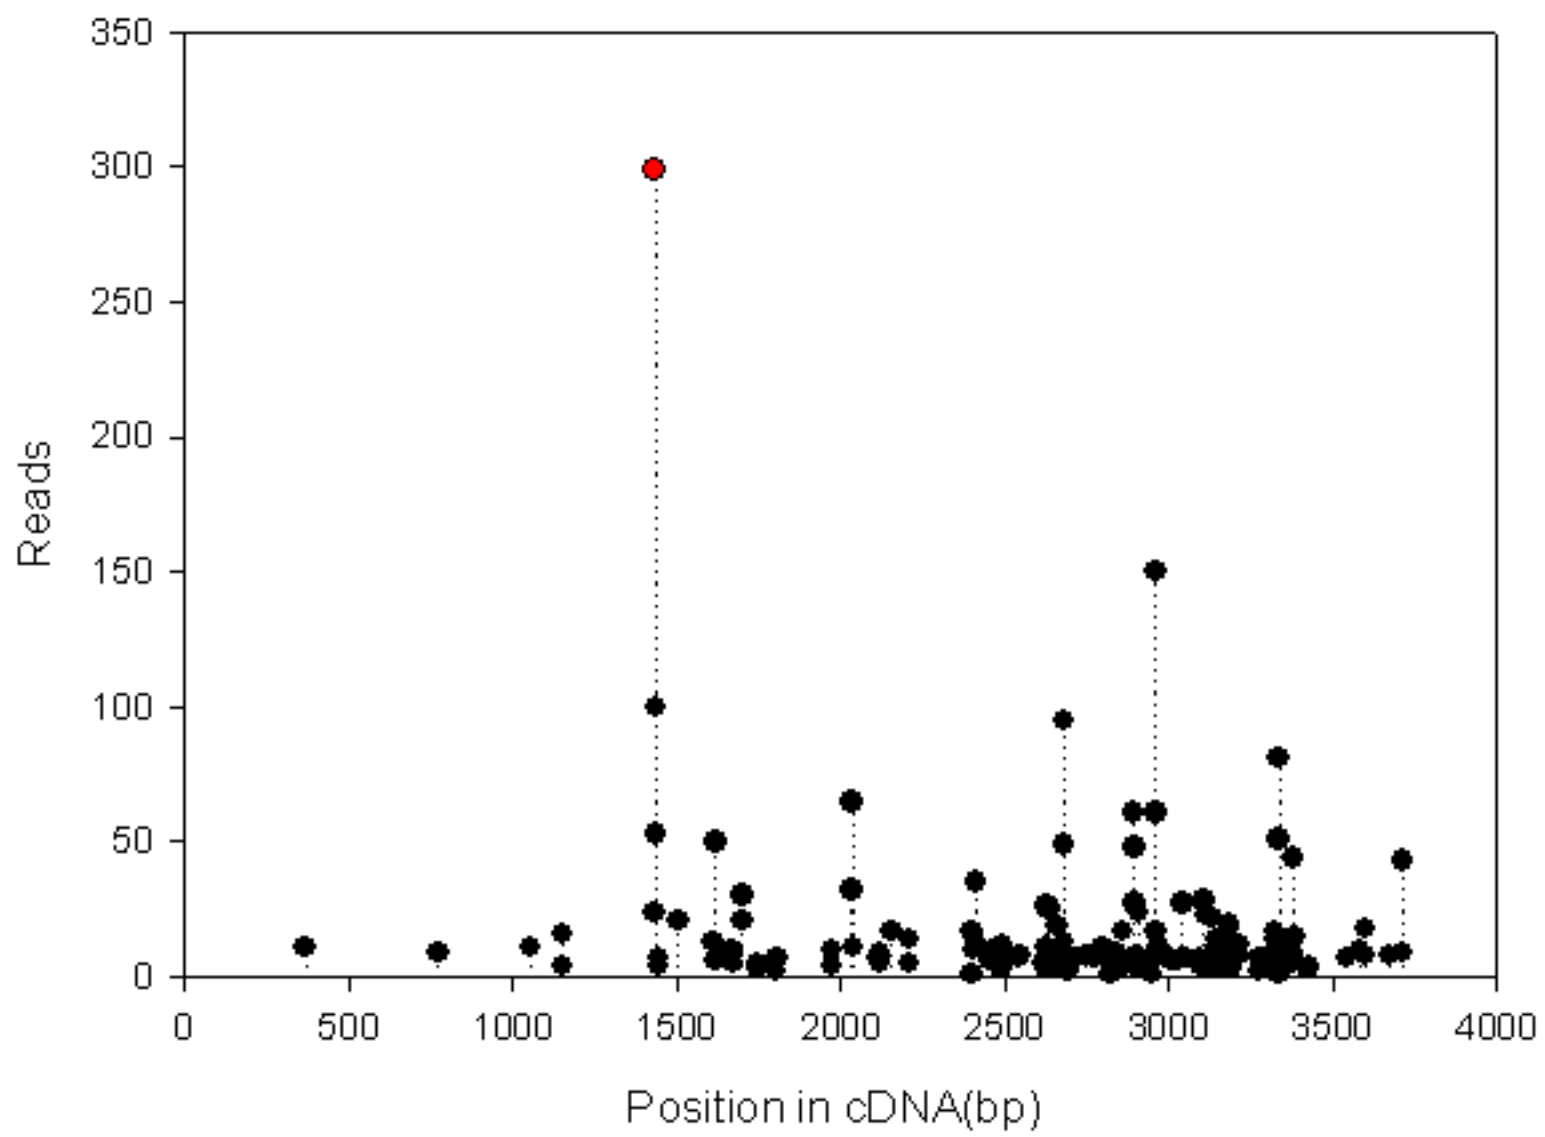

```

5' CCUGGGAUGAAGCCUGGUCCGGAUUC 3'      Cs8g16510.1
   .....
3' ---CCUUACUUCGGACCAGGCUCU-- 5'      Csi-miR166g.1
  
```

Csi-miR166i, target=Cs2g09770.1 gene=Cs2g09770  
 Category:2  
 Score=2.5  
 Cleavage Site=1060



```

5' UGGGAUGAAGCCUGGUC CGGAUUCUA 3' Cs2g09770.1
   ::::::::::::::::::::
3' CCCUUACUUCGGACCAGGCUU----- 5' Csi-miR166i
  
```

Csi-miR166i, target=Cs8g16510.1 gene=Cs8g16510  
 Category=1  
 Score=2.5  
 Cleavage Site=1434



```

5' CCUGGGAUGAAGCCUGGUCGGAUUC 3'      Cs8g16510.1
   ::::::::::::::::::::
3' --CCCUUACUUCGGACCAGGCUU--- 5'      Csi-miR166i

```

Csi-miR166j.1, target=Cs2g09770.1 gene=Cs2g09770  
 Category:3  
 Score=4  
 Cleavage Site=1058



```

5' AUUGGGAUGAAGCCUGGUCGGAUUC 3'      Cs2g09770.1
   ::::::::::::::::::::
3' -CUCCUUACUUCGGACCAGGU----- 5'    Csi-miR166j.1

```

Csi-miR166j.1, target=Cs8g16510.1 gene=Cs8g16510  
 Category=1  
 Score=4  
 Cleavage Site=1434

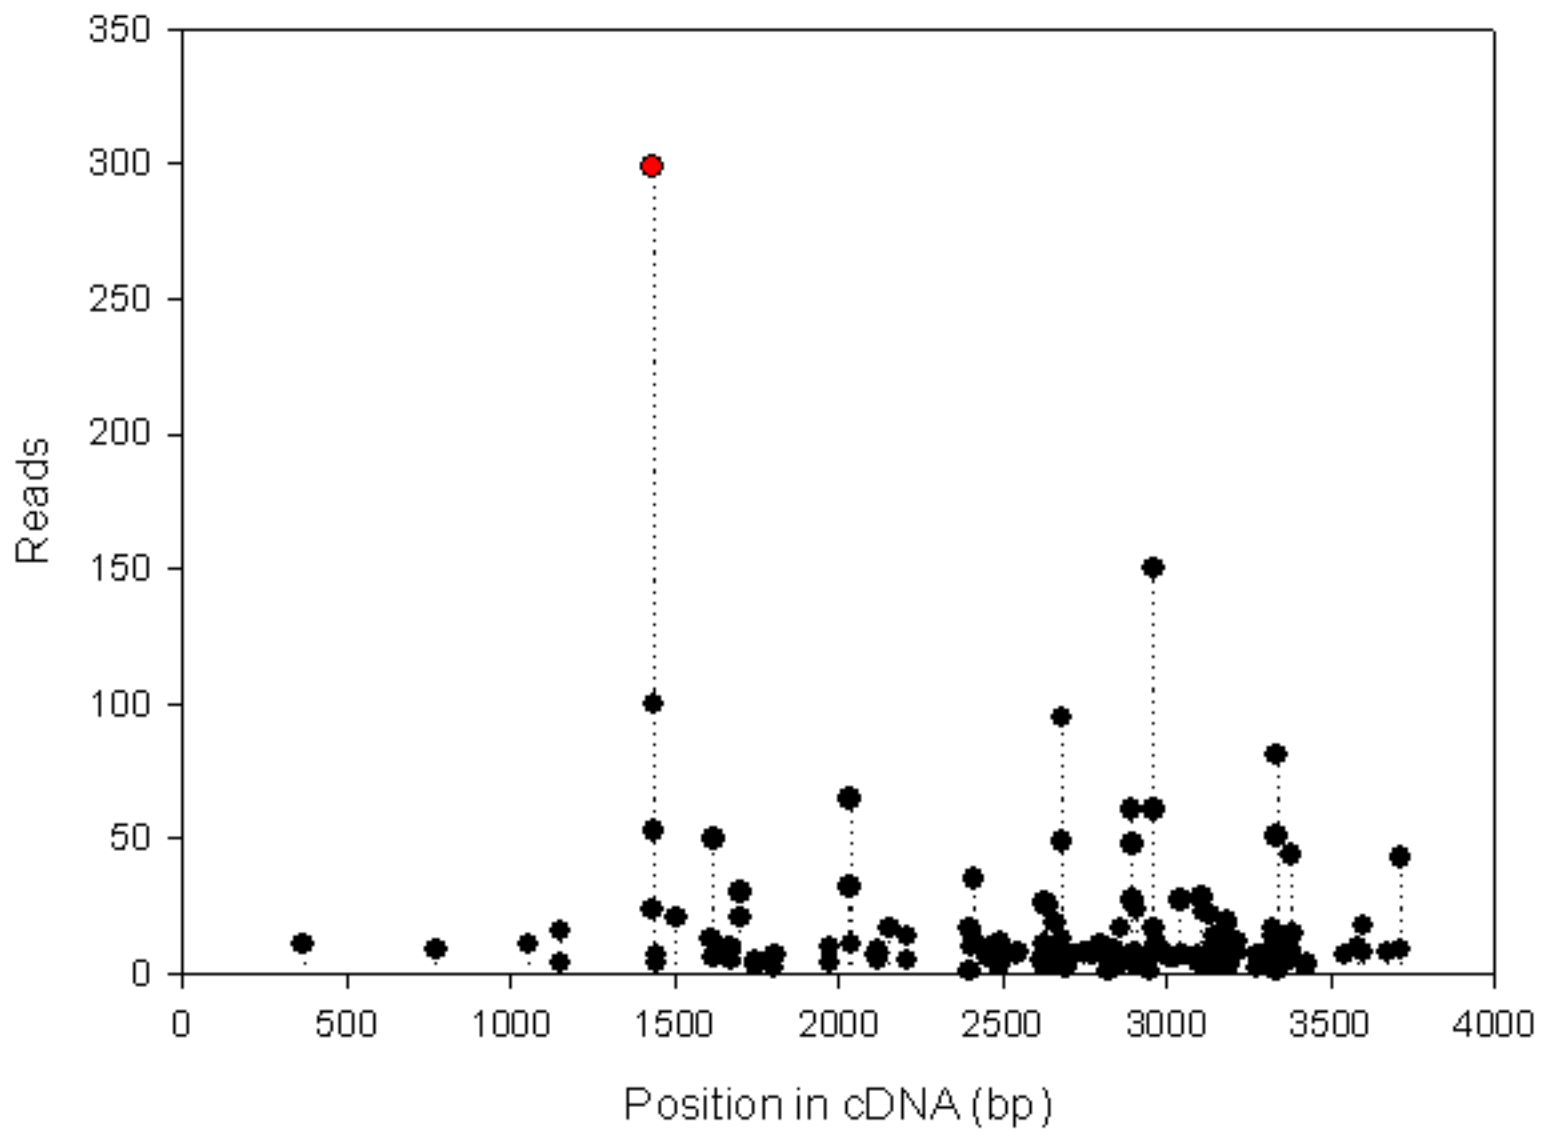

```

5' CCUGGGAUGAAGCCUGGUCGGAUUC 3'          Cs8g16510.1
   : : : : : : : : : : : : : : : :
3' -CUCCUUACUUCGGACCAGGUU---- 5'        Csi-miR166j.1
  
```



Csi-miR166j.2, target=Cs4g14480.1 gene=Cs4g14480  
 Category=3  
 Score=3  
 Cleavage Site=1338

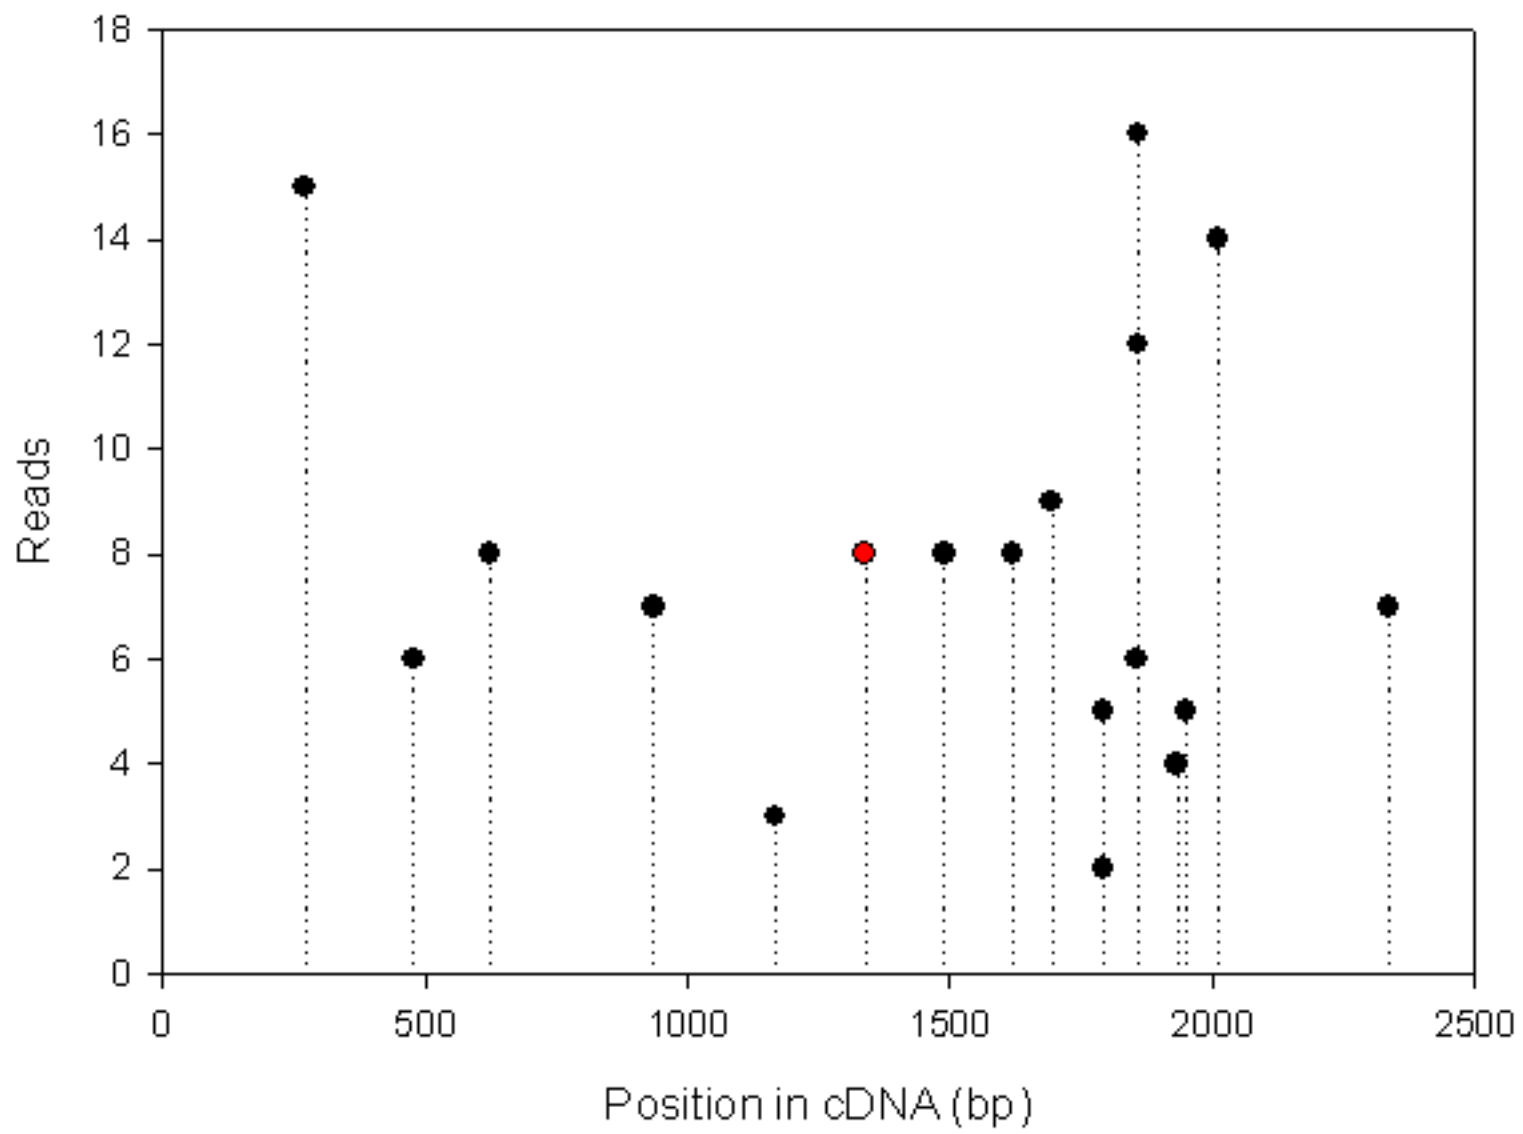

```

5' UGGUAUAAAGCCUGGUCUAAGAGACU 3'      Cs4g14480.1
   :: :: ::::::::::::::::::::
3' -CCUUACUUCGGACCAGGUUCU----- 5'    Csi-miR166j.2

```

Csi-miR166j.3, target=Cs2g09770.1 gene=Cs2g09770  
 Category:3  
 Score=3  
 Cleavage Site=1058



```

5' AUUGGGAUGAAGCCUGGUCGGAUUC 3'      Cs2g09770.1
   .....
3' -CACCUUACUUCGGACCAGGU---- 5'      Csi-miR166j.3

```

Csi-miR166j.3, target=Cs8g16510.1 gene=Cs8g16510  
 Category=1  
 Score=3  
 Cleavage Site=1434

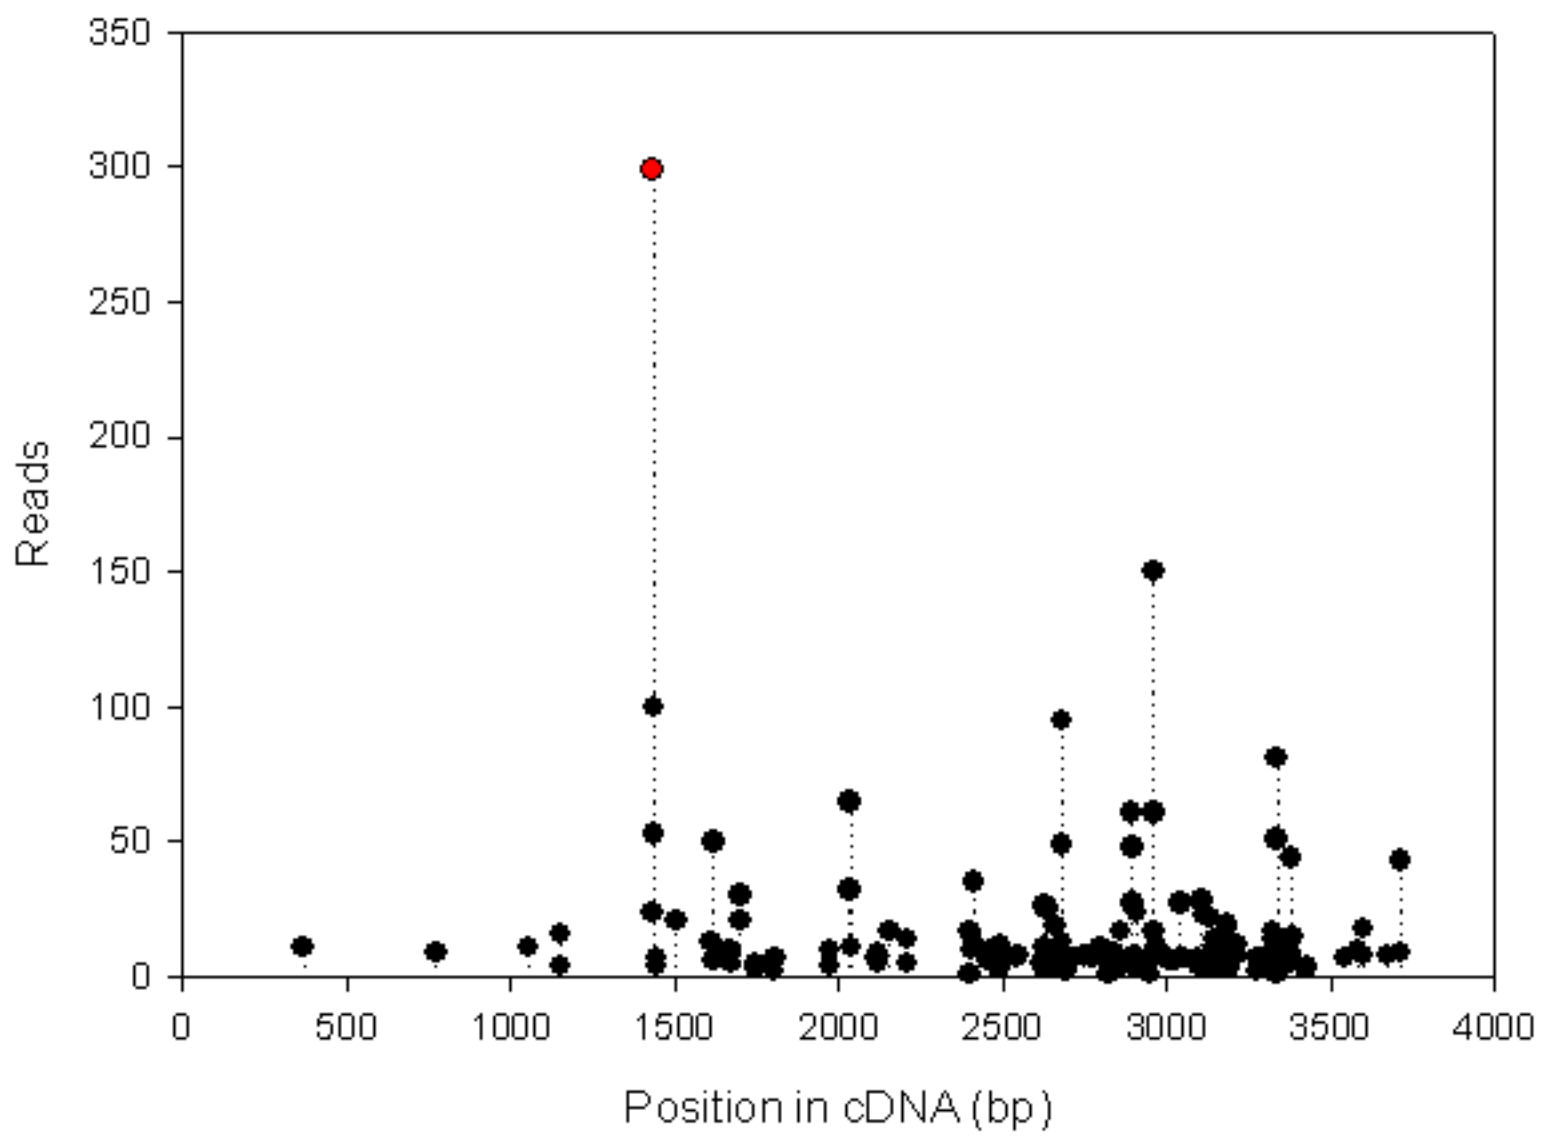

```

5' CCUGGGAUGAAGCCUGGUCCGGAUUC 3'      Cs8g16510.1
   ::::::::::::::::::::
3' -CACCUUACUUCGGACCAGGUU----- 5'    Csi-miR166j.3
  
```

Csi-miR167a.1, target=Cs2g15130.1 gene=Cs2g15130  
 Category=1  
 Score=5  
 Cleavage Site=3444

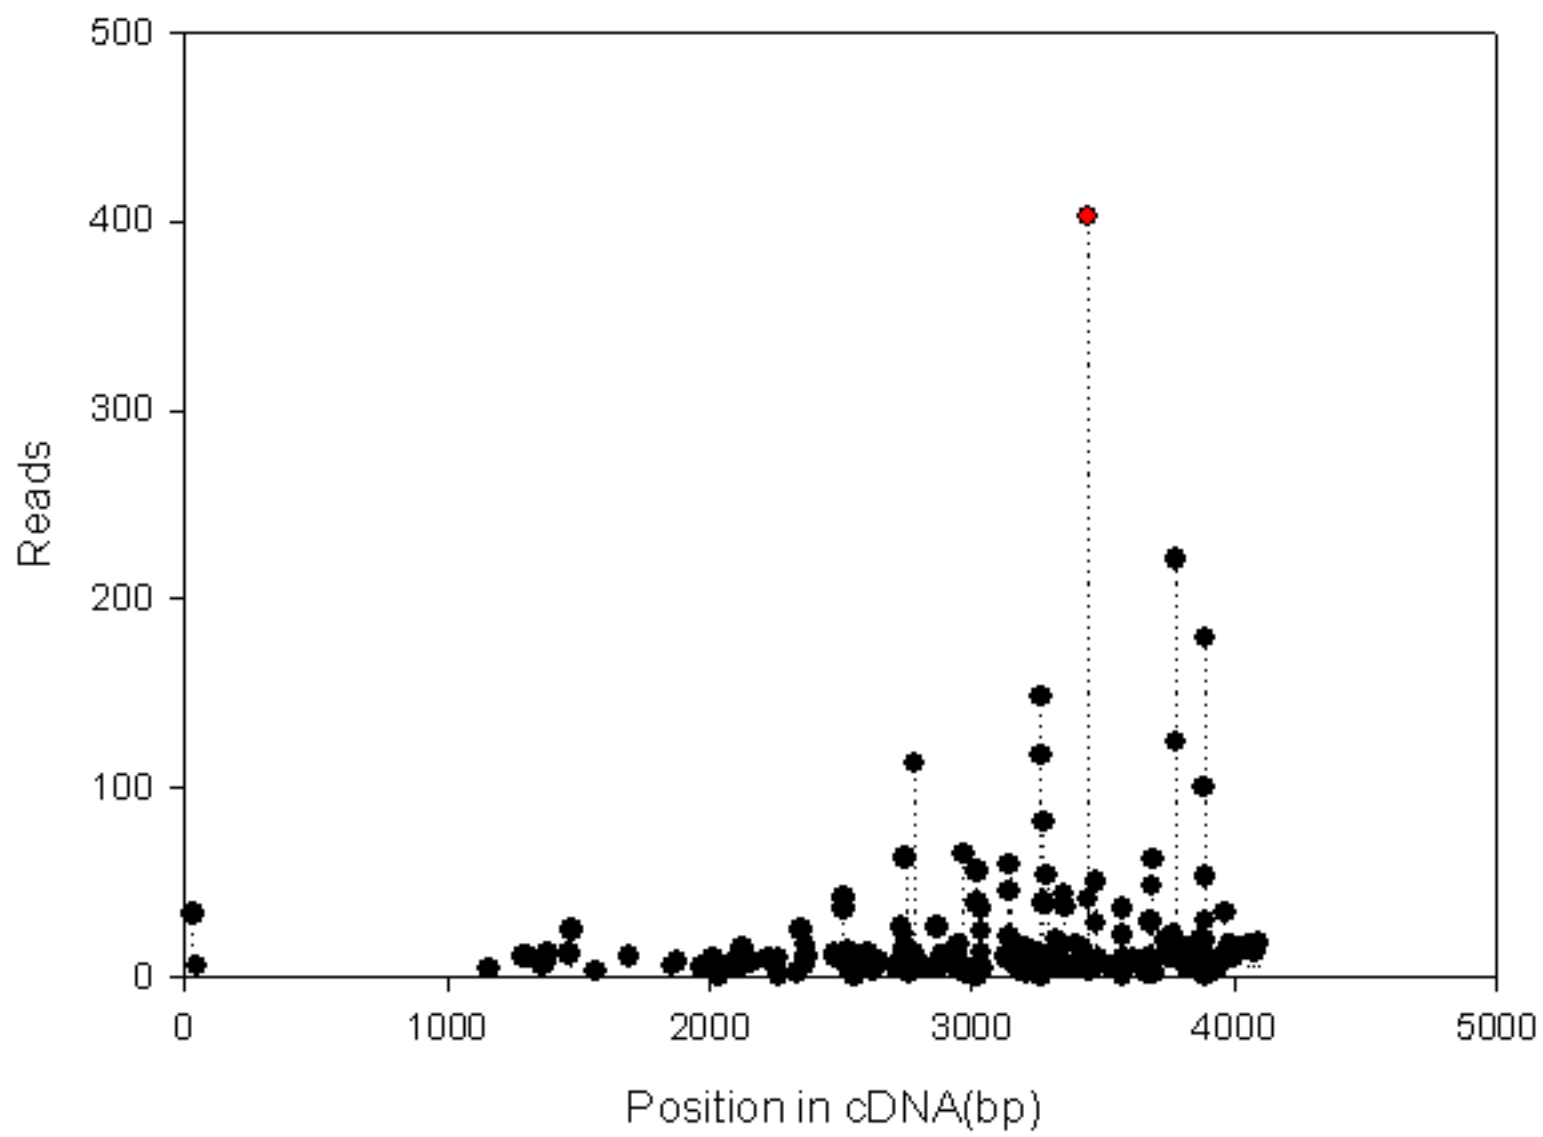

```

5' AGAGAUCAGGCUGGCAGCUUGUAUUU 3'      Cs2g15130.1
   ::::: ::::::::::::::: .:
3' -AUCUAGUACGACCGUCGAA-GU--- 5'      Csi-miR167a.1
  
```

Csi-miR167a.1, target=Cs8g08320.1 gene=Cs8g08320  
 Category:3  
 Score=5  
 Cleavage Site=584

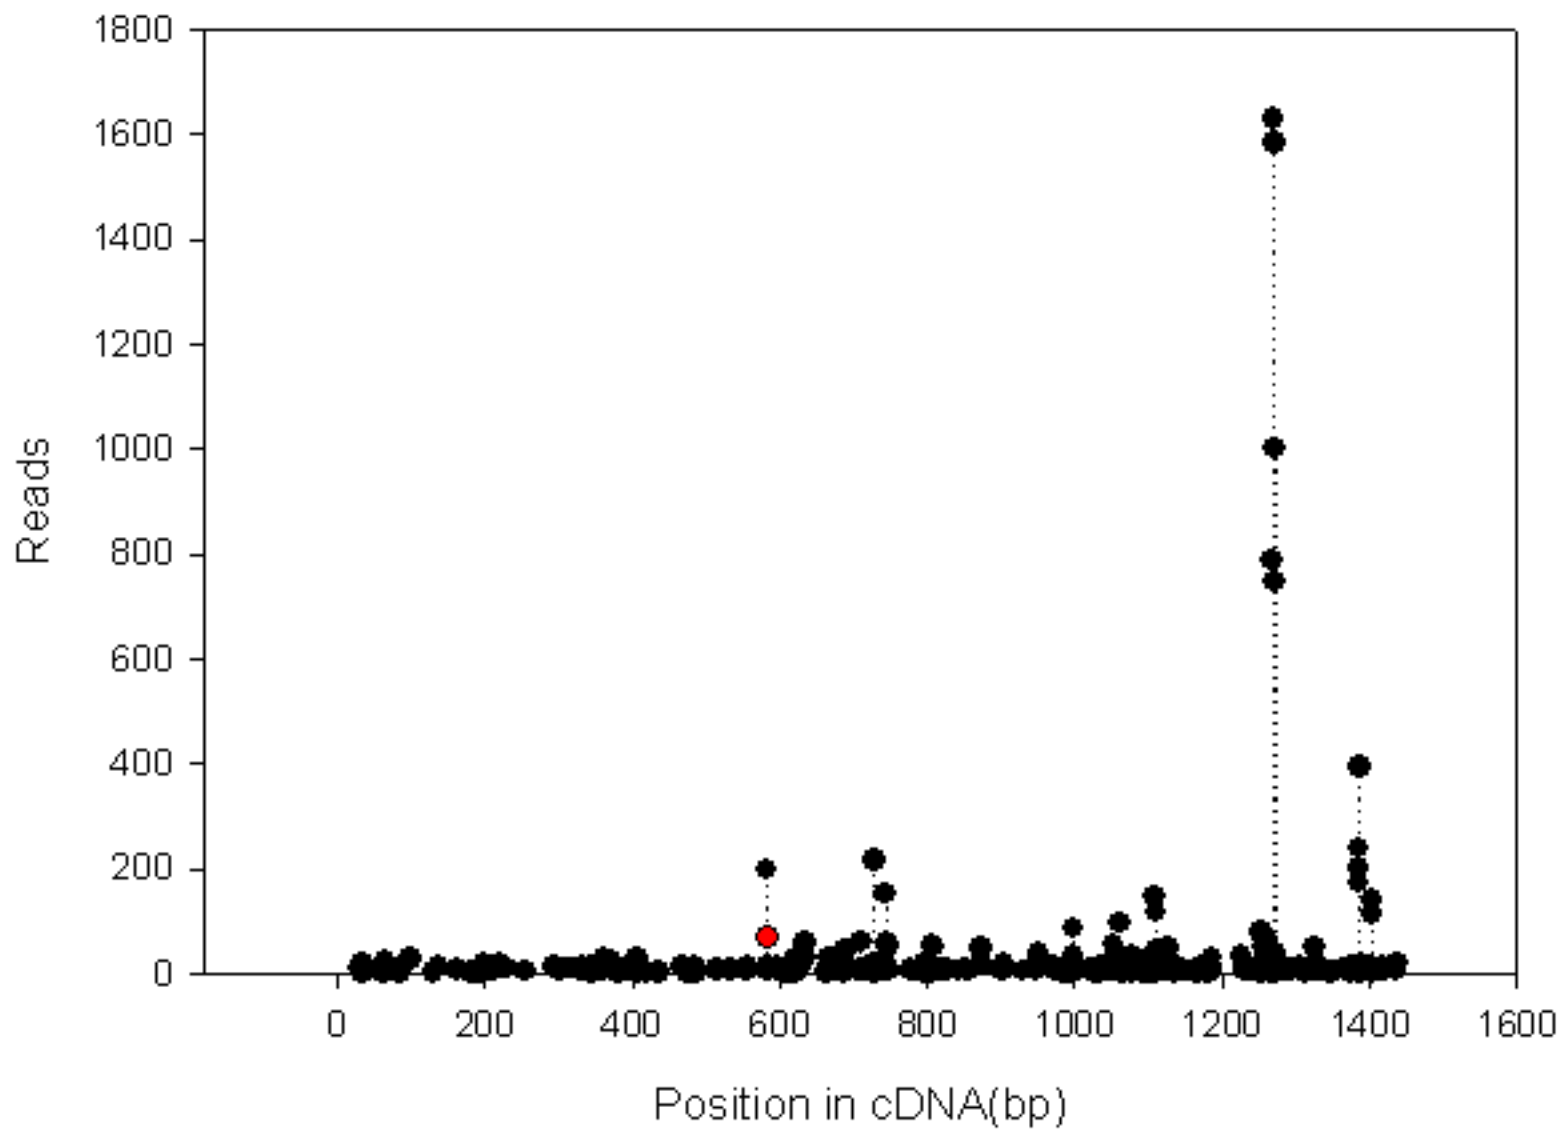

```

5' UUCAUGC GGAUCAUGCUGG-AGUUUCA 3'      Cs8g08320.1
      . : : : : : : : : : : : : : : : : :
3' -----AUCUAGUACGACCGUCGAAGU 5'      Csi-miR167a.1
  
```

Csi-miR167b.1, target=Cs2g15130.1 gene=Cs2g15130  
 Category=1  
 Score=4  
 Cleavage Site=3444

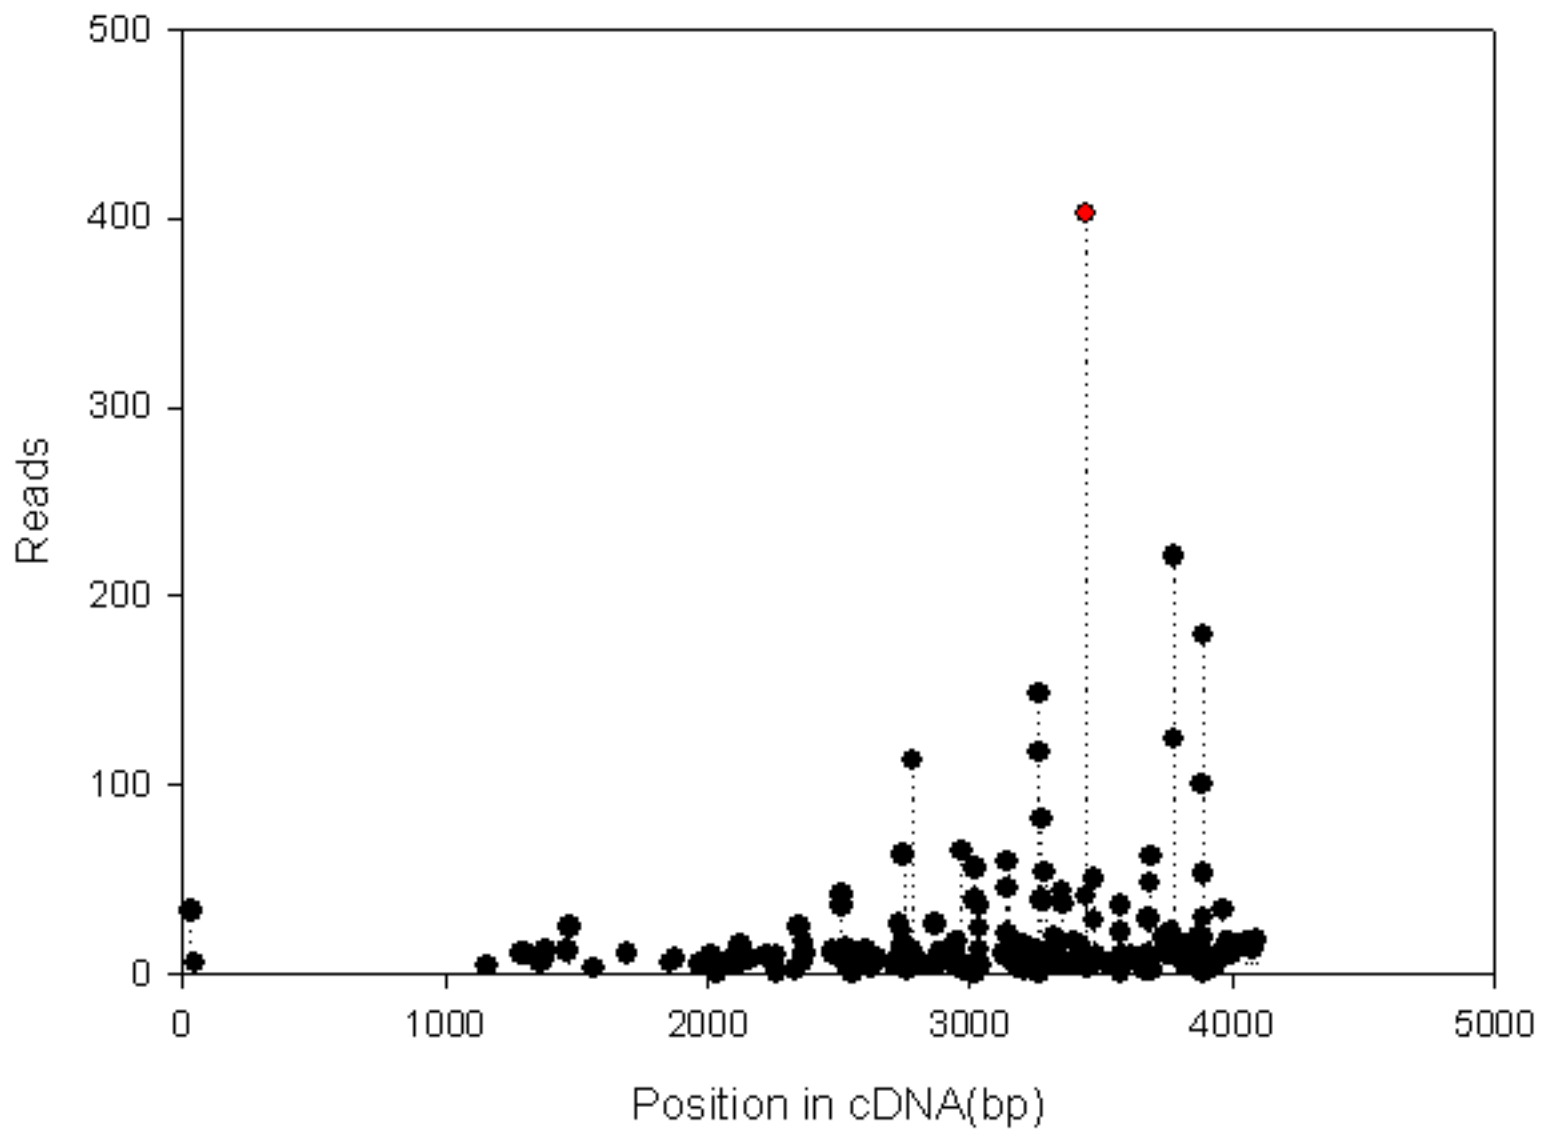

```

5' AGAGAUCAGGCUGGCAGCUUGUAUUU 3'           Cs2g15130.1
   ::::: ::::::::::::::: ::
3' --UCUAGUACGACCGUCGAA-GU--- 5'           Csi-miR167b.1
  
```

Csi-miR167b.1, target=Cs8g08320.1 gene=Cs8g08320  
 Category:3  
 Score=3.5  
 Cleavage Site=584

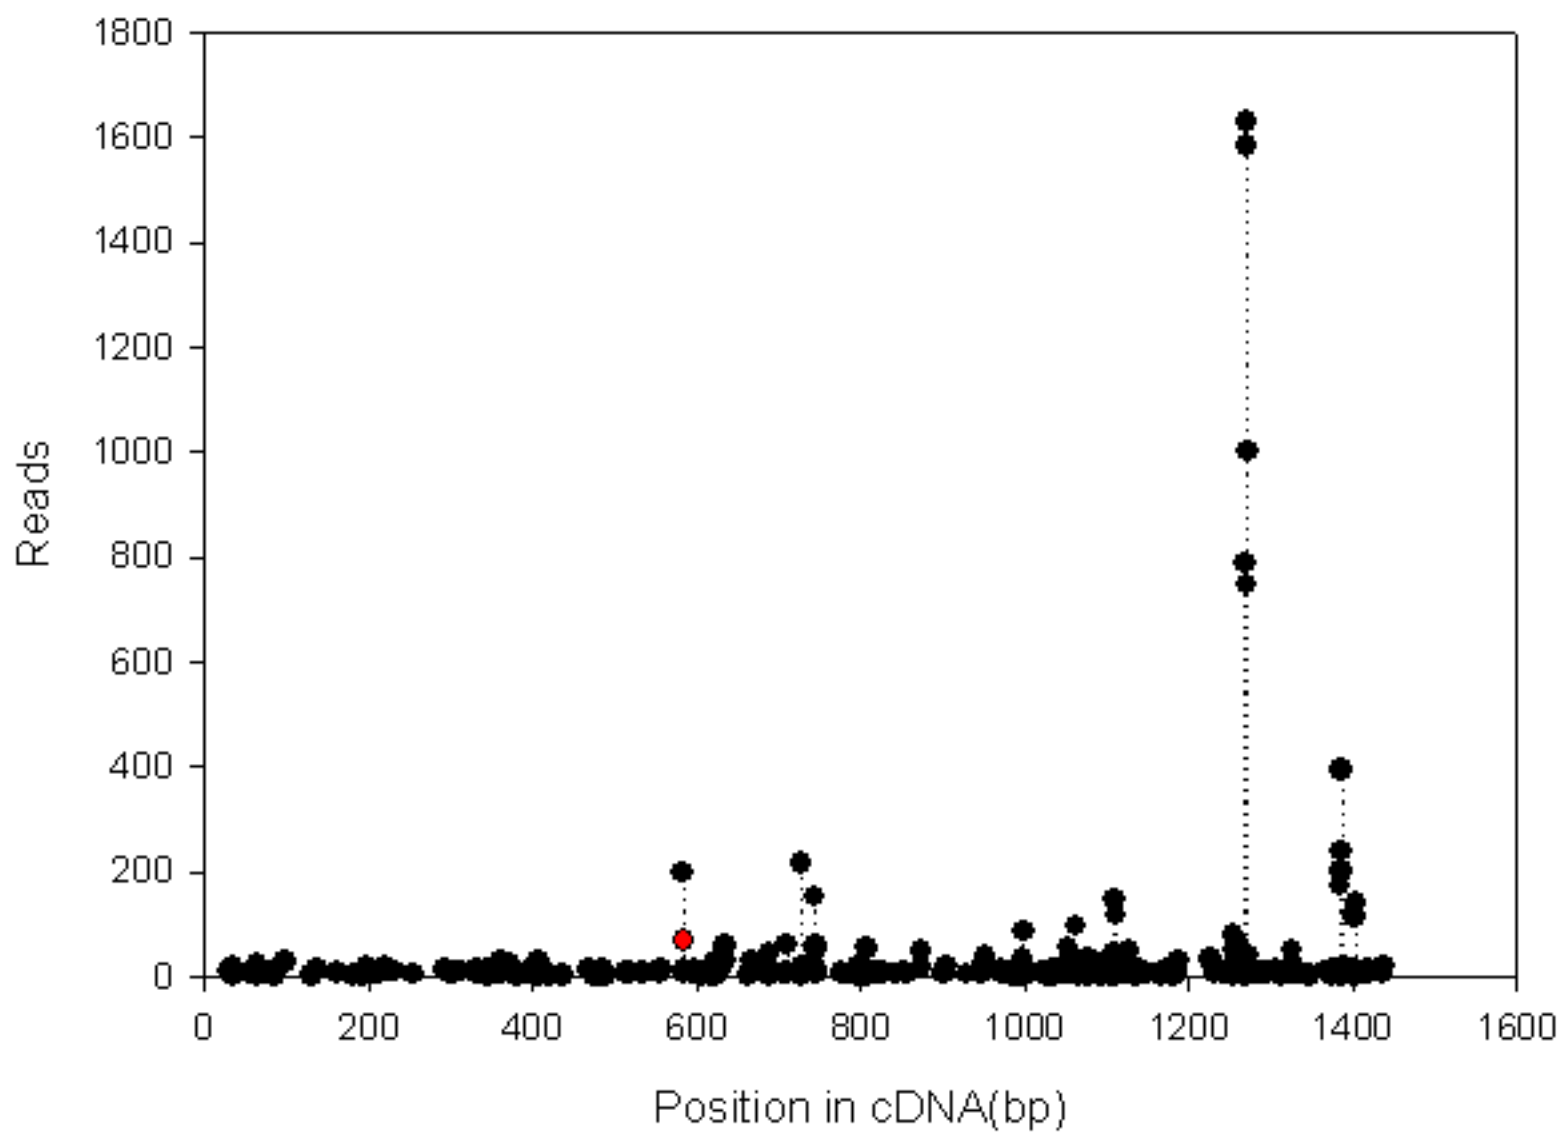

|                                    |               |
|------------------------------------|---------------|
| 5' UUCAUGC GGAUCAUGCUGG-AGUUUCA 3' | Cs8g08320.1   |
| . . . . . : . . . . .              |               |
| 3' -----UCUAGUACGACCGUCGAAGU 5'    | Csi-miR167b.1 |

Csi-miR167b.2, target=Cs1g09030.1 gene=Cs1g09030  
 Category=3  
 Score=5  
 Cleavage Site=1246

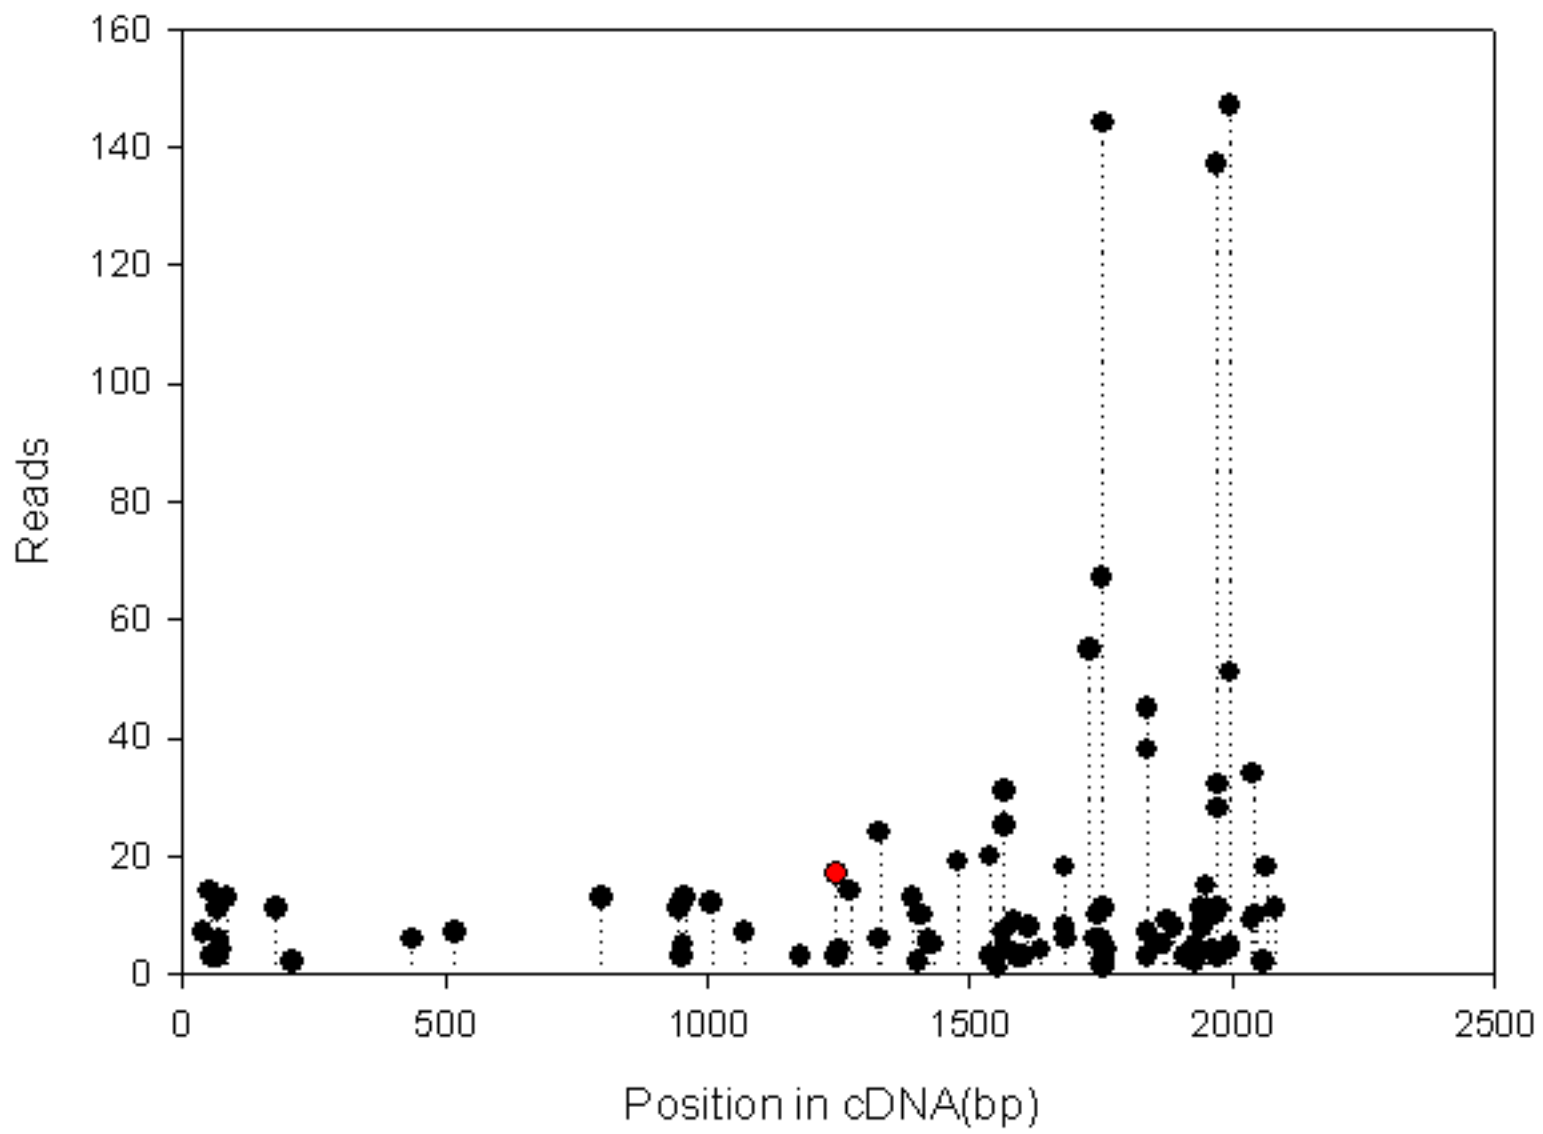

5' UGGUGAAAUCAAGCUGGCAGACUUCG 3'

Cs1g09030.1

:.: :.:.: :.:.:.:.: :.:.:.:

3' ---AUUCUAGUACGACCGUC-GAAGU 5'

Csi-miR167b.2



Csi-miR167b.3, target=Cs2g15130.1 gene=Cs2g15130  
 Category=1  
 Score=3.5  
 Cleavage Site=3444



```

5' AGAGAUCAGGCUGGCAGCUUGUAUUU 3'      Cs2g15130.1
   . . . . . : . . . . .
3' AUUCUAGUACGACCGUCGAA----- 5'      Csi-miR167b.3

```

Csi-miR167b.4, target=Cs2g15130.1 gene=Cs2g15130  
 Category=1  
 Score=4.5  
 Cleavage Site=3444



```

5' AGAGAUCAGGCUGGCAGCUUGUAUUU 3'      Cs2g15130.1
   . . . . . : . . . . . : . . . . . : . .
3' -UUCUAGUACGACCGUCGAA-GU--- 5'      Csi-miR167b.4
  
```

Csi-miR167b.4, target=Cs8g08320.1 gene=Cs8g08320  
 Category:3  
 Score=4.5  
 Cleavage Site=584

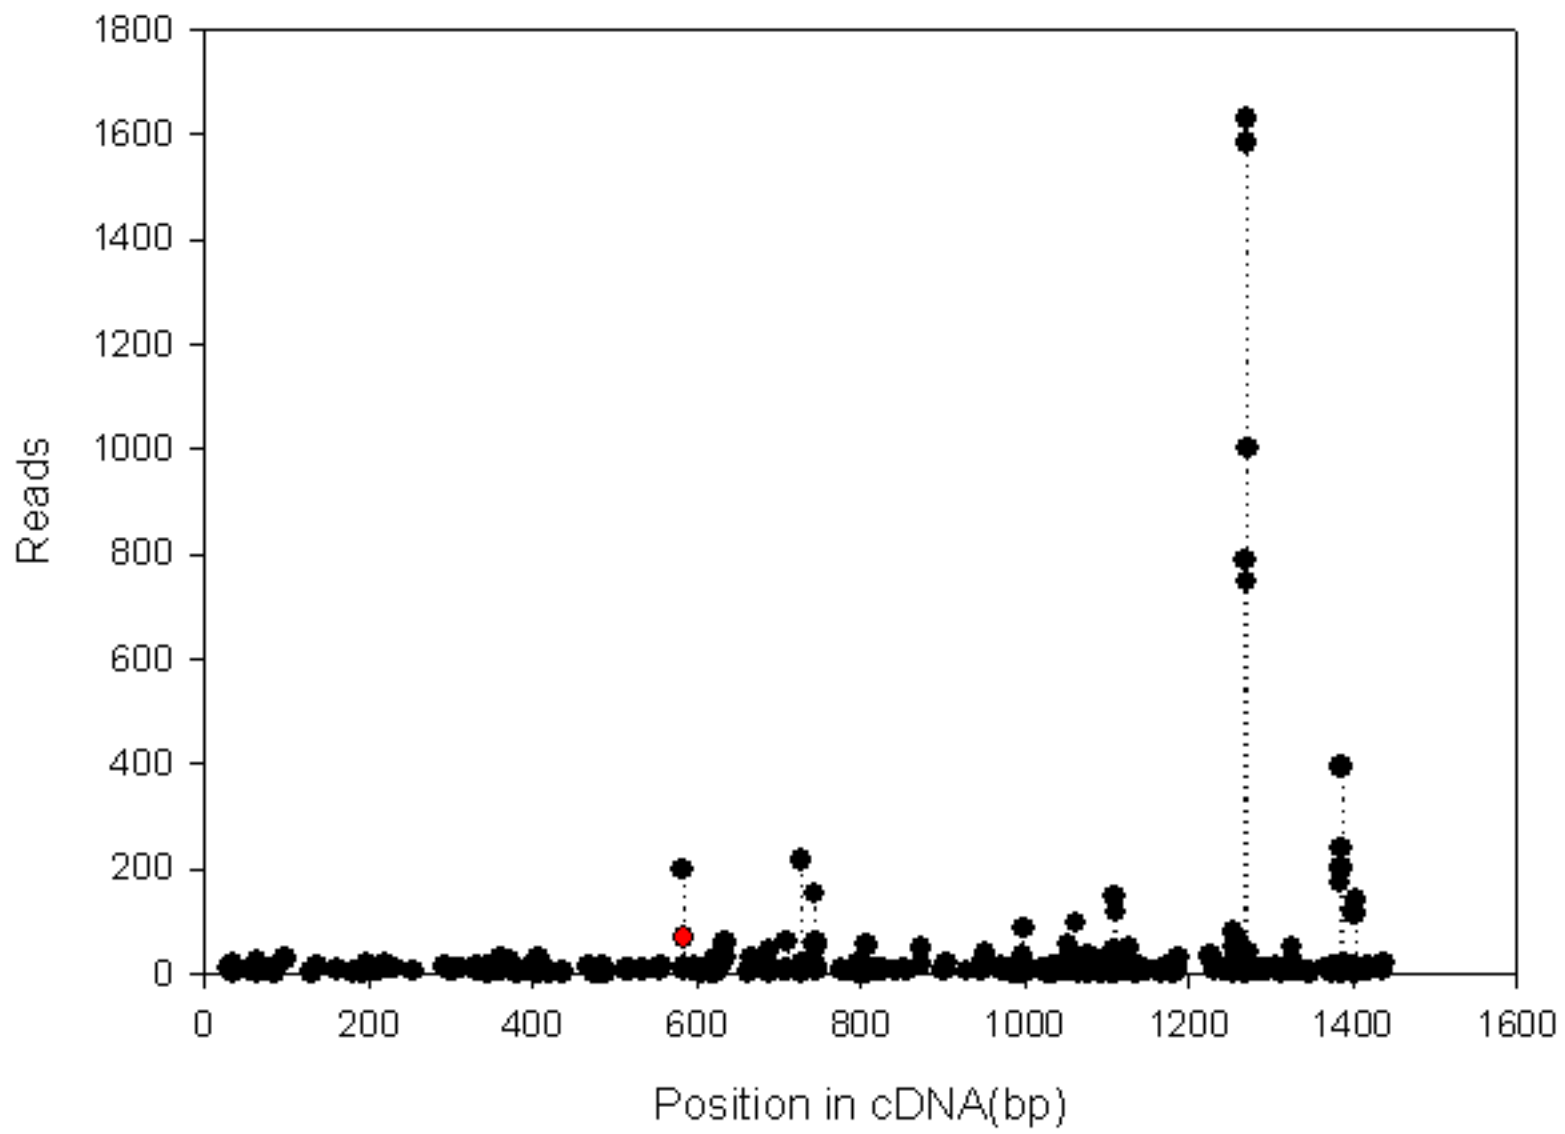

```

5' UUCAUGC GGAUCAUGCUGG-AGUUUCA 3'      Cs8g08320.1
      . . . . .
3' -----UUCUAGUACGACCGUCGAAGU 5'      Csi-miR167b.4
  
```

Csi-miR167d.1, target=Cs8g08320.1 gene=Cs8g08320  
 Category=3  
 Score=4.5  
 Cleavage Site=584



```

5' UUCAUGC GGAUCAUGCUGG-AGUUUCA 3'      Cs8g08320.1
   : : : : : : : : : : : : : : : : : :
3' -----AGUCUAGUACGACCGUCGAAGU 5'      Csi-miR167d.1

```

Csi-miR167d.2, target=Cs2g15130.1 gene=Cs2g15130  
 Category=1  
 Score=5  
 Cleavage Site=3444



```

5' AGAGAUCAGGCUGGCAGCUUGUAUUU 3'      Cs2g15130.1
   ::::: ::::::::::: .:
3' -GUCUAGUACGACCGUCGAA-GU--- 5'      Csi-miR167d.2
  
```

Csi-miR167d.2, target=Cs8g08320.1 gene=Cs8g08320  
 Category:3  
 Score=3.5  
 Cleavage Site=584



```

5' UUCAUGC GGAUCAUGCUGG-AGUUUCA 3'      Cs8g08320.1
      :.:.:.:.:.:.:.:.:.:.:.:.:.:.:.:
3' -----GUCUAGUACGACCGUCGAAGU 5'      Csi-miR167d.2
  
```

Csi-miR168a, target=Cs5g16710.1 gene=Cs5g16710  
 Category=3  
 Score=5  
 Cleavage Site=797

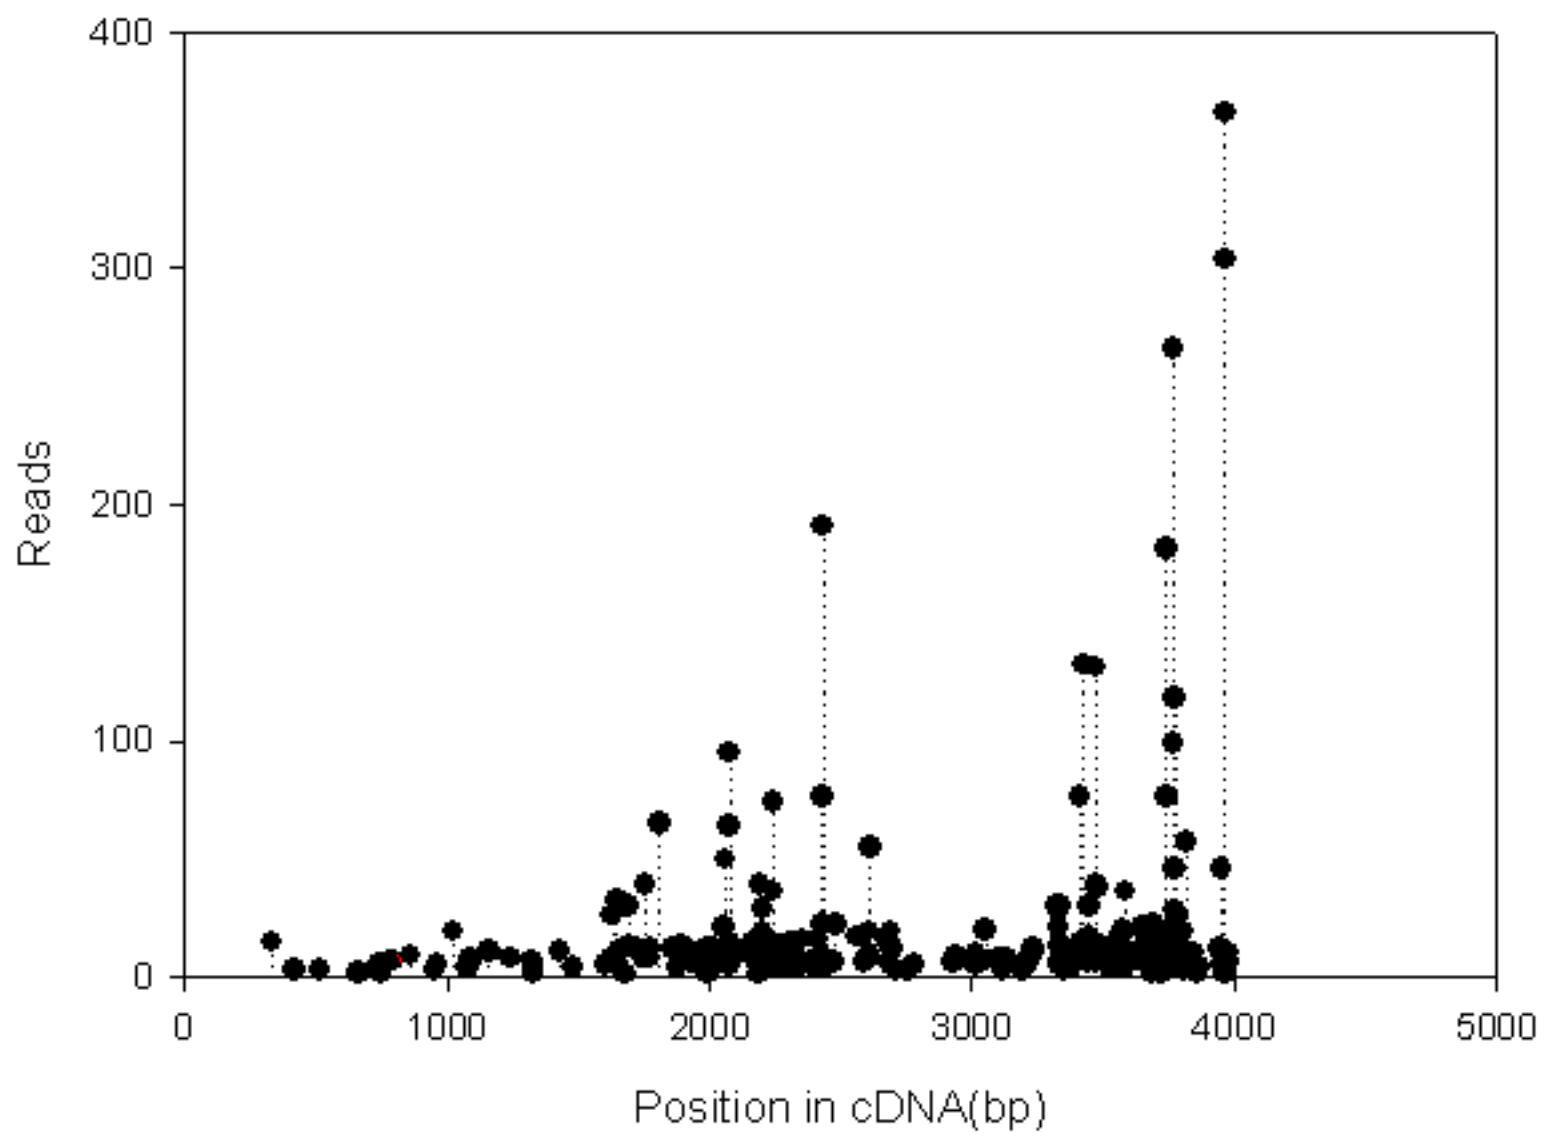

```

5' AUUCCCGAGCUACACCAAGCAACCCC 3'      Cs5g16710.1
   : : : : : : : : : : : : : : : :
3' -AAGGGCUGGACGUGGUUCGCU----- 5'    Csi-miR168a

```

Csi-miR169b.1, target=Cs6g13560.1 gene=Cs6g13560  
 Category=1  
 Score=3.5  
 Cleavage Site=1307

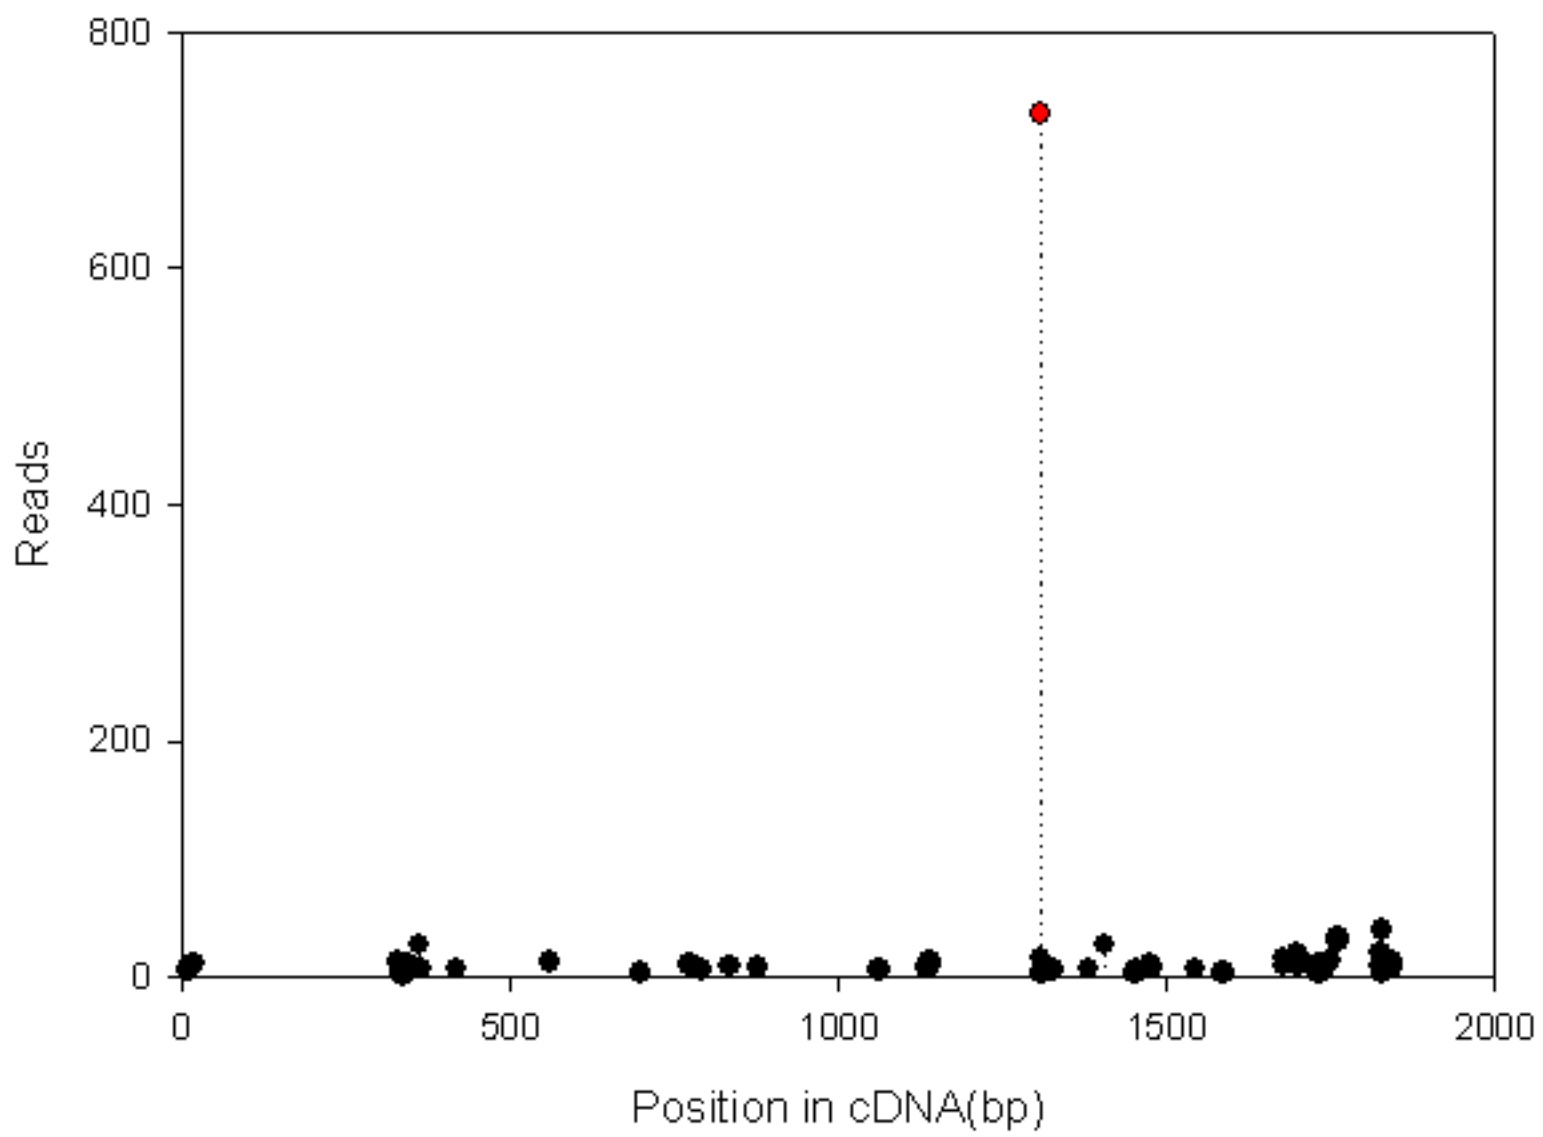

```

5' UUAGGCAAUAUCAUUCUUGGCUCAUCU 3'          Cs6g13560.1
   . . . . . . . . . . . . . . . . . . . .
3' -GUCCGUUCAGUAGGAACCGAU----- 5'        Csi-miR169b.1

```



Csi-miR169b.1-3p, target=Cs2g28180.1 gene=Cs2g28180  
 Category:3  
 Score=5  
 Cleavage Site=546

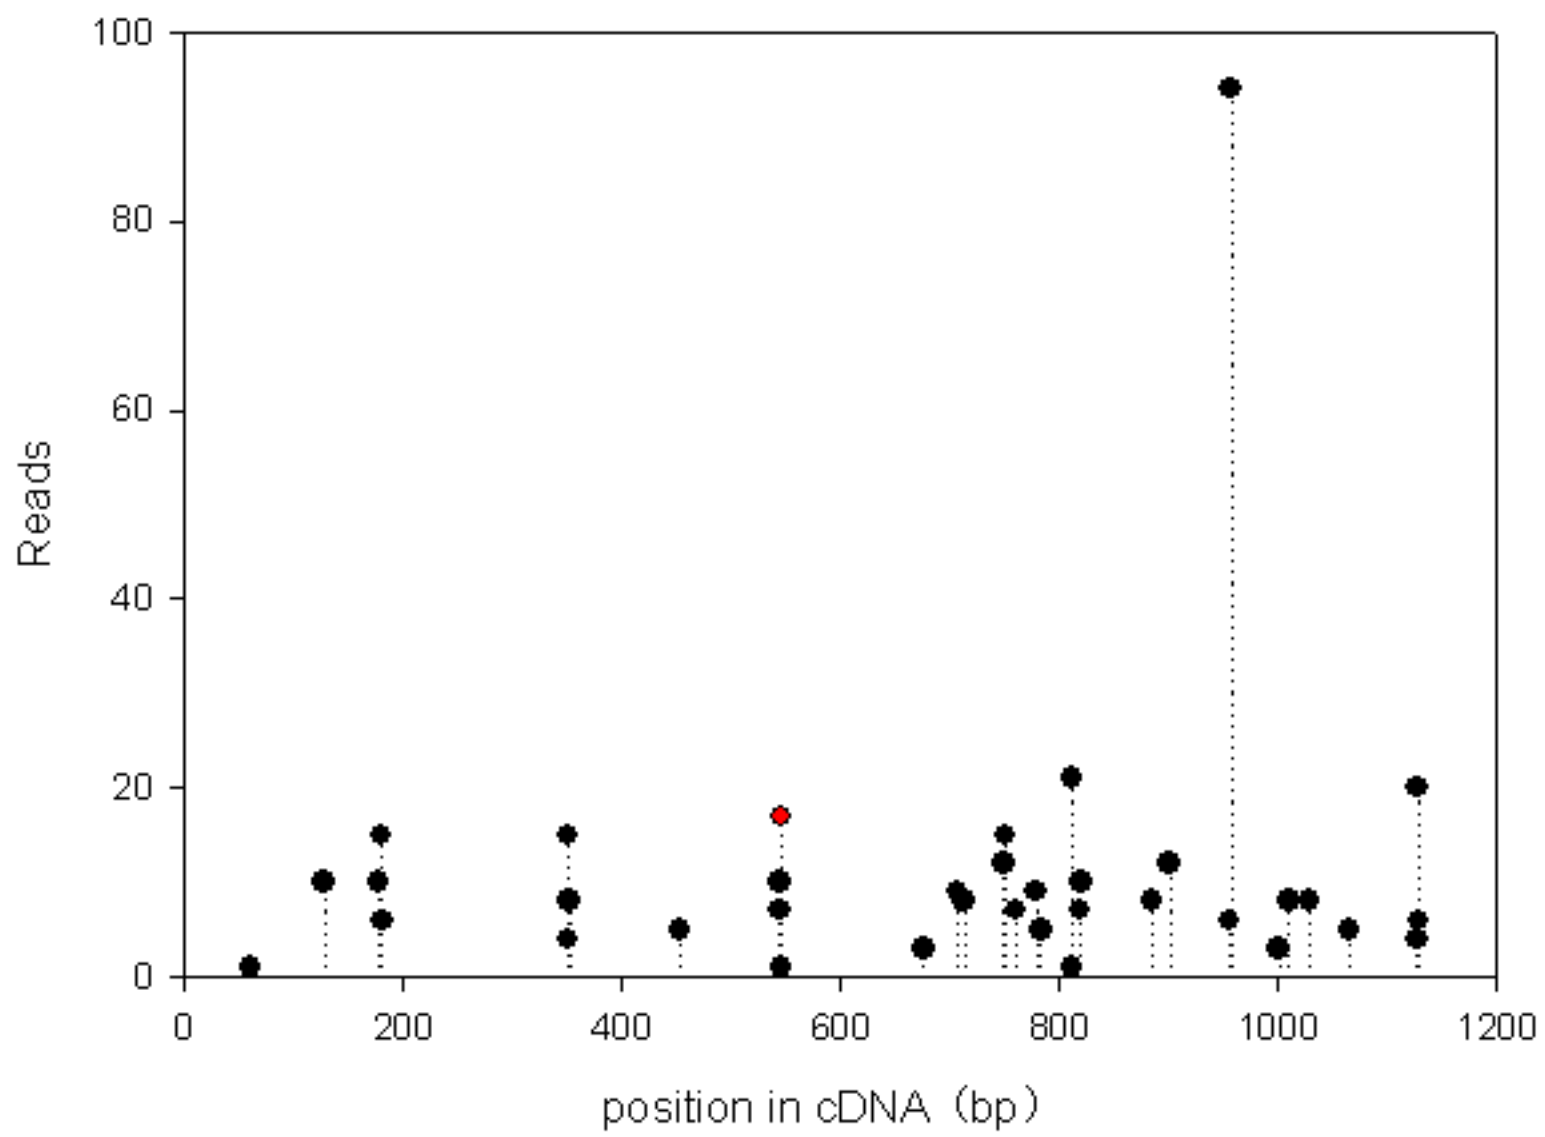

```

5' UUUUUUU-GCCACUGAGACUGCCUAU 3'      Cs2g28180.1
   : : : : : : : : : : : : : : : :
3' -----GAAUCGGUUCCUCUGACGGA-- 5'    Csi-miR169b.1-3p
  
```

Csi-miR169b.1-3p, target=Cs9g16380.1 gene=Cs9g16380  
 Category=3  
 Score=5  
 Cleavage Site=619

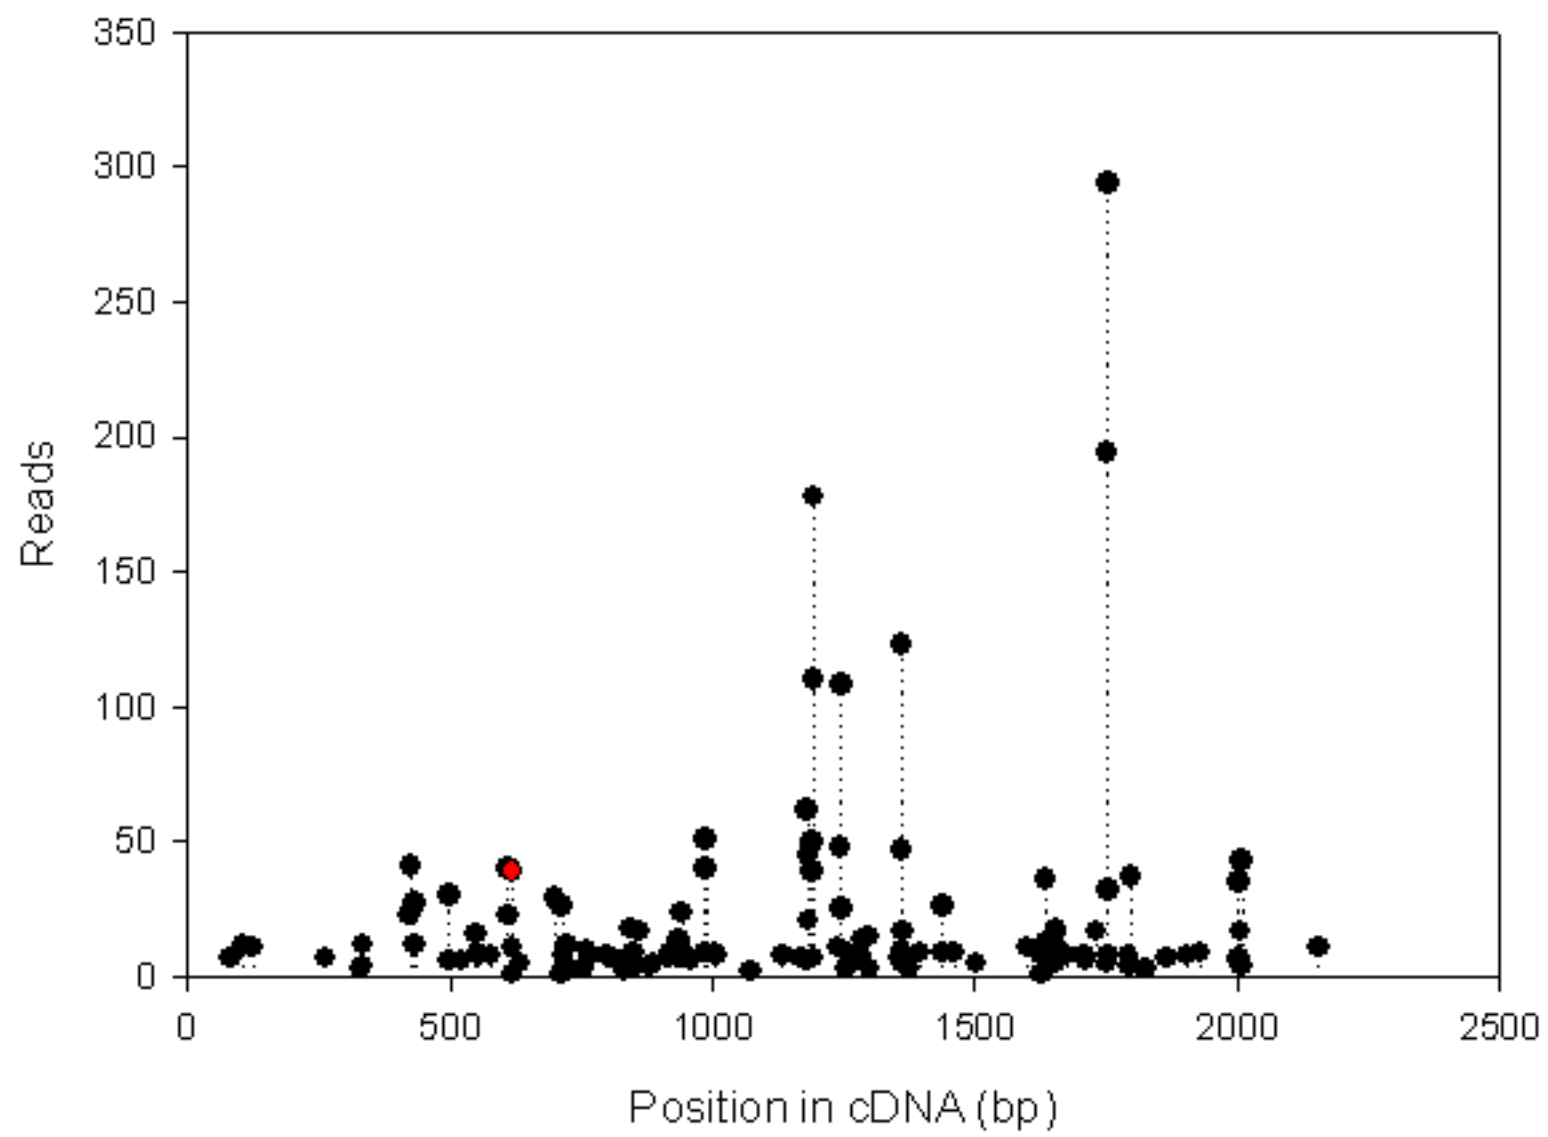

```

5' GACAUCGCCAAGGGGAUUGC UUACCU 3'      Cs9g16380.1
   : : : : : : : : : : : : : : : :
3' --GAAUCGGUCCUCUGACGGA----- 5'      Csi-miR169b.1-3p
  
```

Csi-miR169i.1, target=Cs6g13560.1 gene=Cs6g13560  
 Category=1  
 Score=3.5  
 Cleavage Site=1307

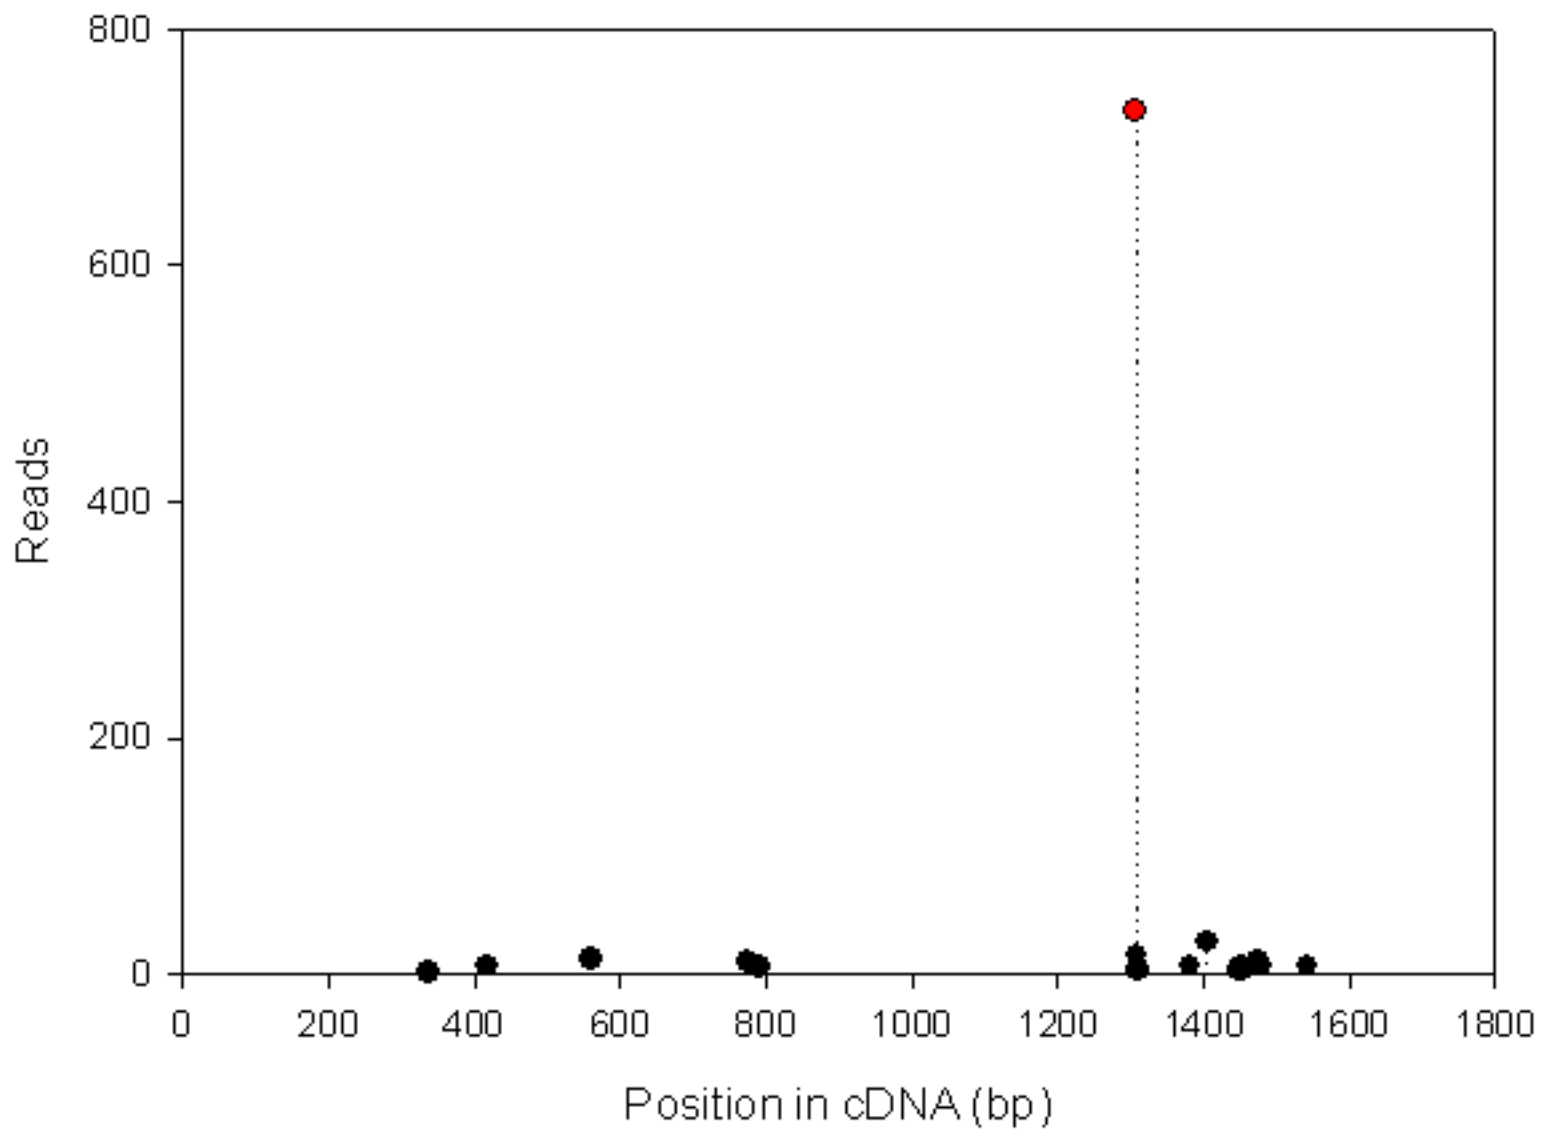

```

5' UUAGGCAAAAUCAUUCUUGGCUCAUCU 3'      Cs6g13560.1
   .....
3' AGUCCGUUCAGUAGGAACCGAU----- 5'      Csi-miR169i.1
  
```

Csi-miR169i.1-3p, target=Orange1.1t00423.1 gene=Orange1.1t00423  
 Category=3  
 Score=4.5  
 Cleavage Site=1434

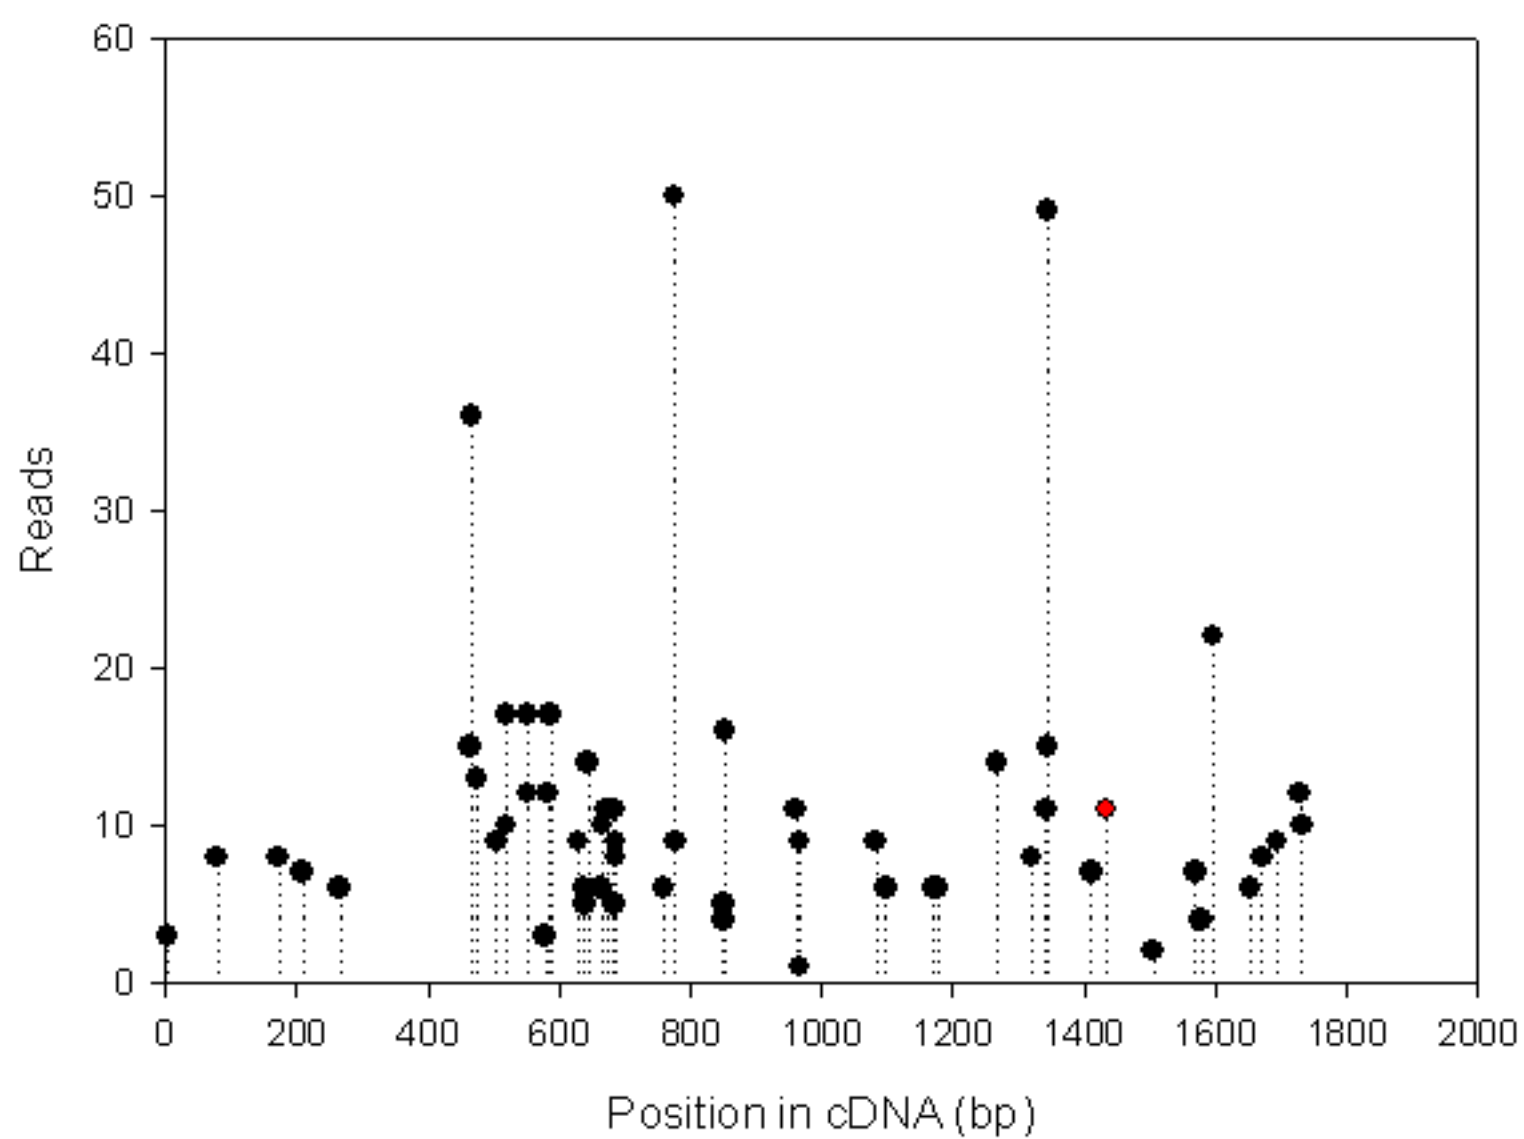

```

5' AGGUGGCCAUGGAGACUGCAUCUCAA 3'
   : : : : : : : : : : : : : :
3' -CAAUCGGUCCUCUGACGG----- 5'
  
```

```

Orange1.1t00423.1
Csi-miR169i.1-3p
  
```

Csi-miR169m.1, target=Cs3g24090.1 gene=Cs3g24090  
 Category=1  
 Score=5  
 Cleavage Site=1205

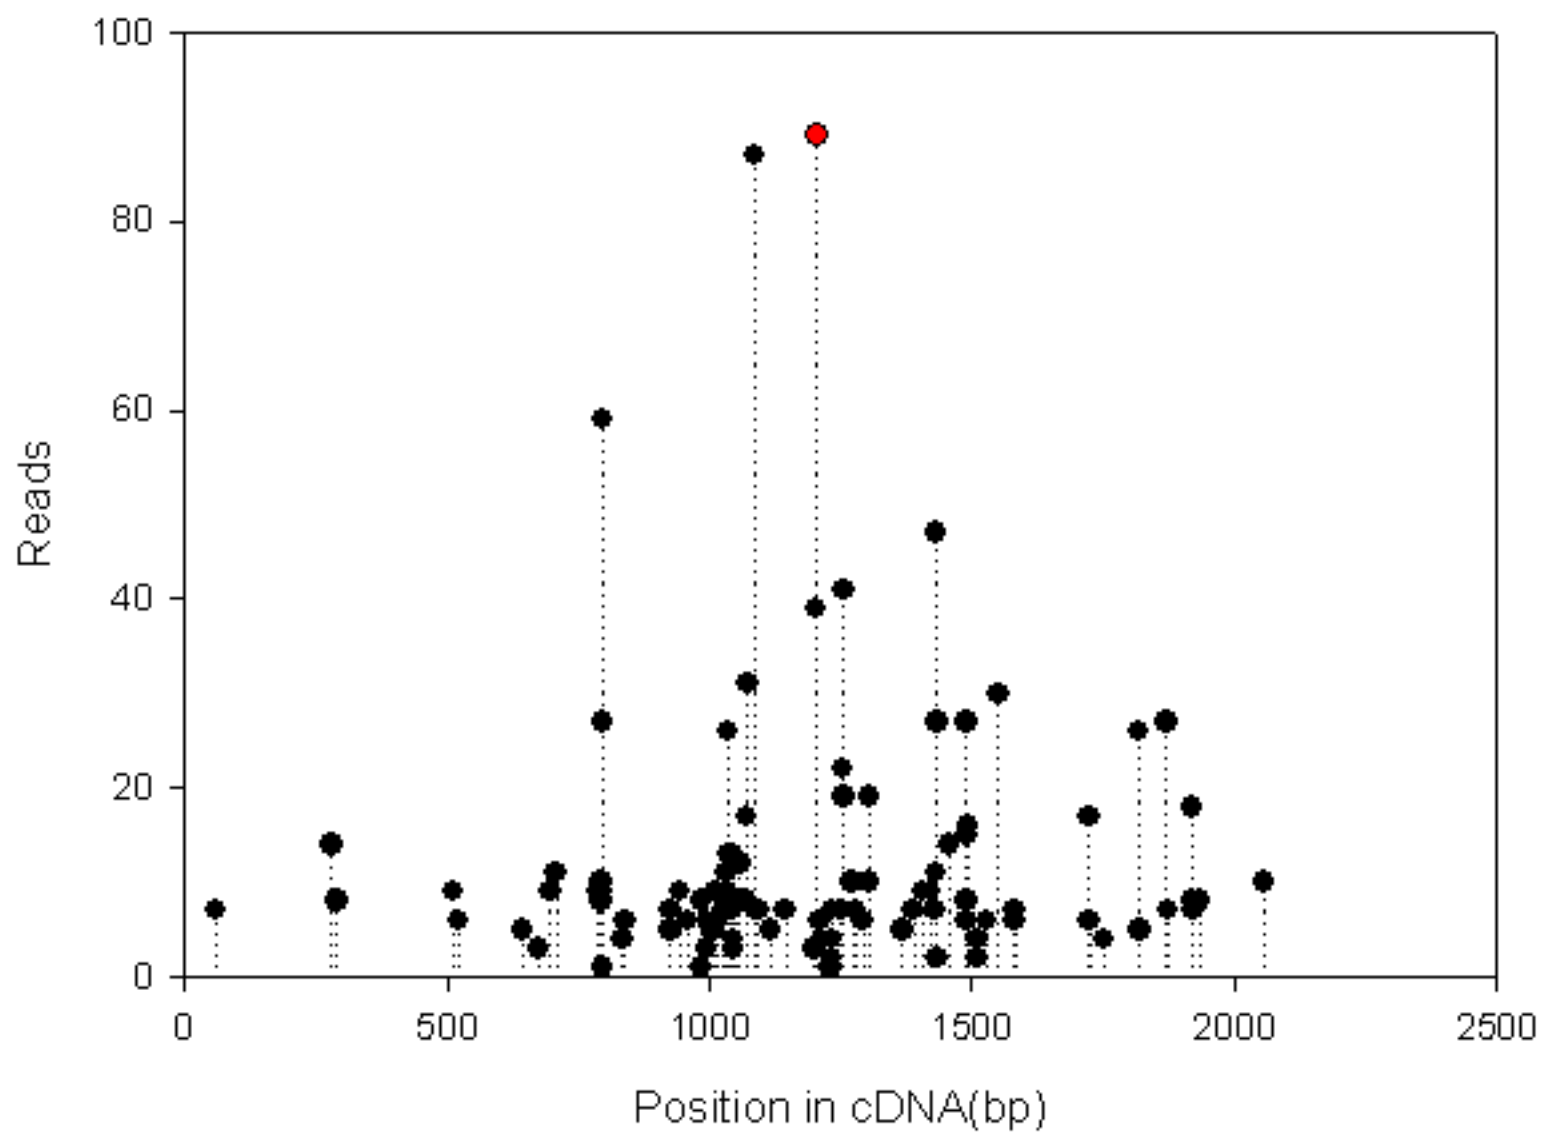

```

5' UUUGUUGUUCAAGUCGUUCUUGGCUG 3'          Cs3g24090.1
   . . . : : : : : : : : : : : : : : :
3' ----GGC-CGUUCAGUAGGAACCGAC 5'          Csi-miR169m.1
  
```

Csi-miR169m.1, target=Cs6g13560.1 gene=Cs6g13560  
 Category=1  
 Score=4.5  
 Cleavage Site=1307

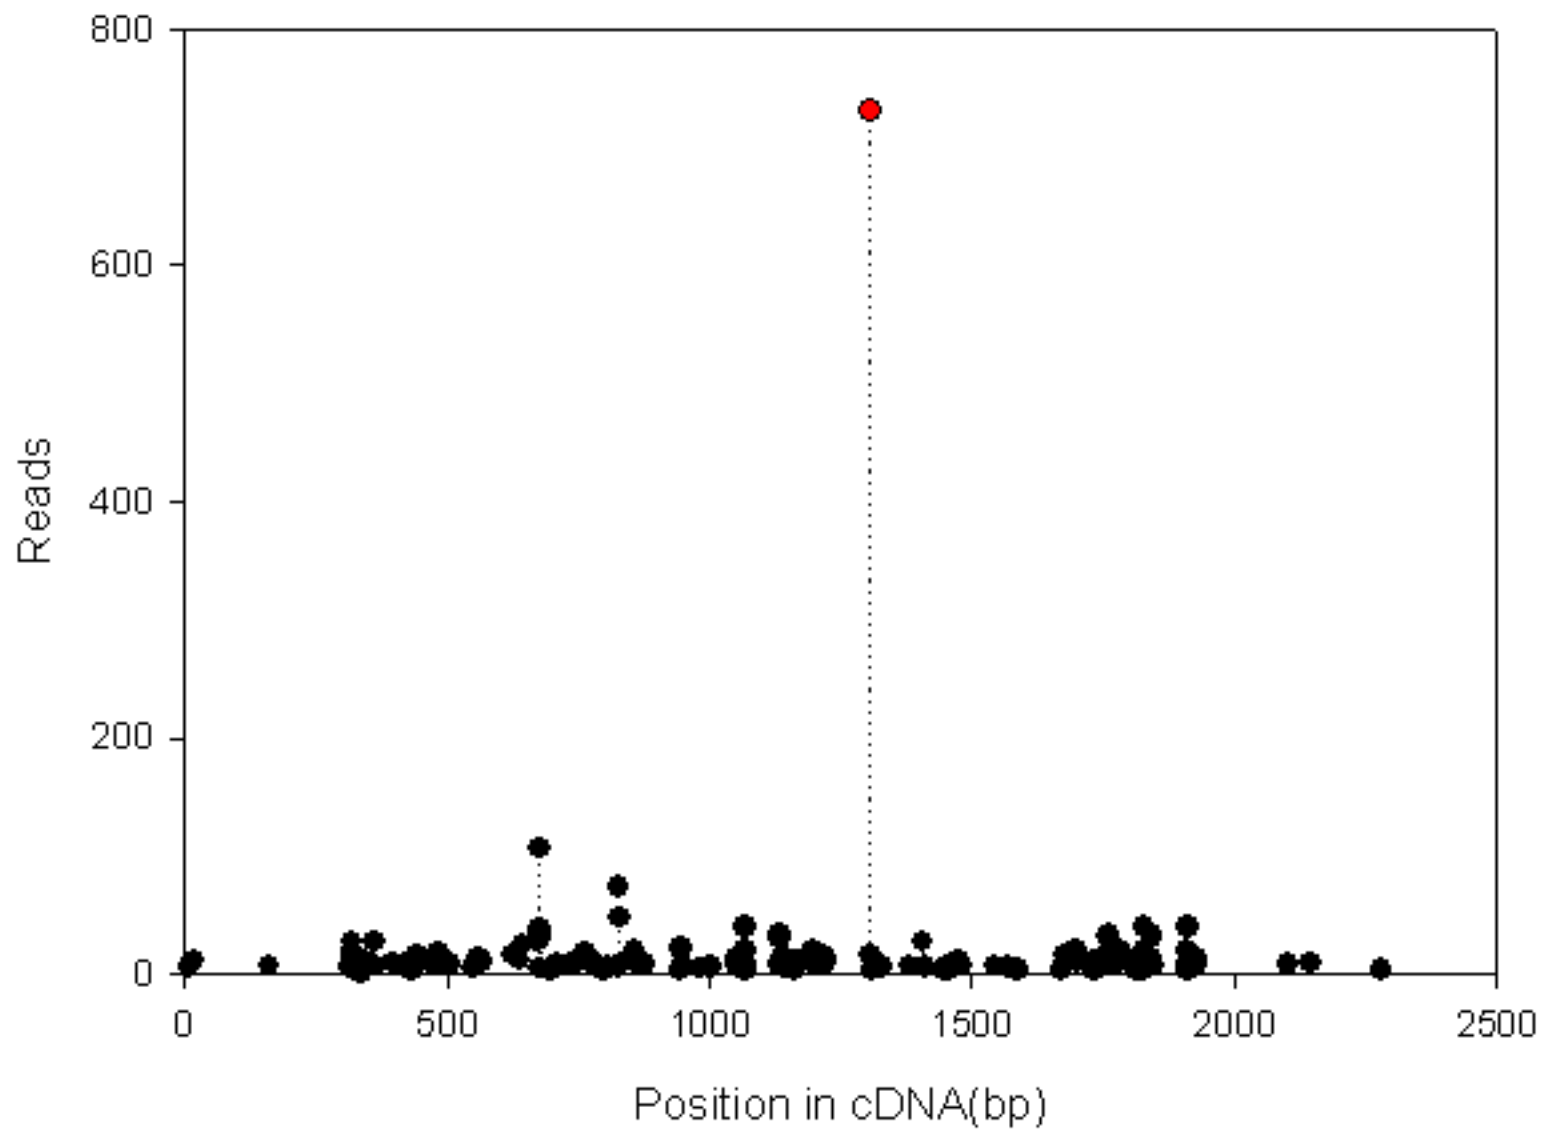

```

5' UUAGGCAAUAUCAUUCUUGGCUCAUCU 3'          Cs6g13560.1
.  : : : : : : : : : : : : : : : :
3' -GGCCGUUCAGUAGGAACCGAC----- 5'        Csi-miR169m.1
  
```

Csi-miR169m.2, target=Cs3g24090.1 gene=Cs3g24090  
 Category=1  
 Score=5  
 Cleavage Site=1205



5' UUUGUUGUUCAAGUCGUUCUUGGCUG 3' Cs3g24090.1

:...: :.....

3' ---CGGC-CGUUCAGUAGGAACCGA- 5' Csi-miR169m.2

Csi-miR169m.3, target=Cs7g06000.1 gene=Cs7g06000  
 Category=3  
 Score=5  
 Cleavage Site=2907

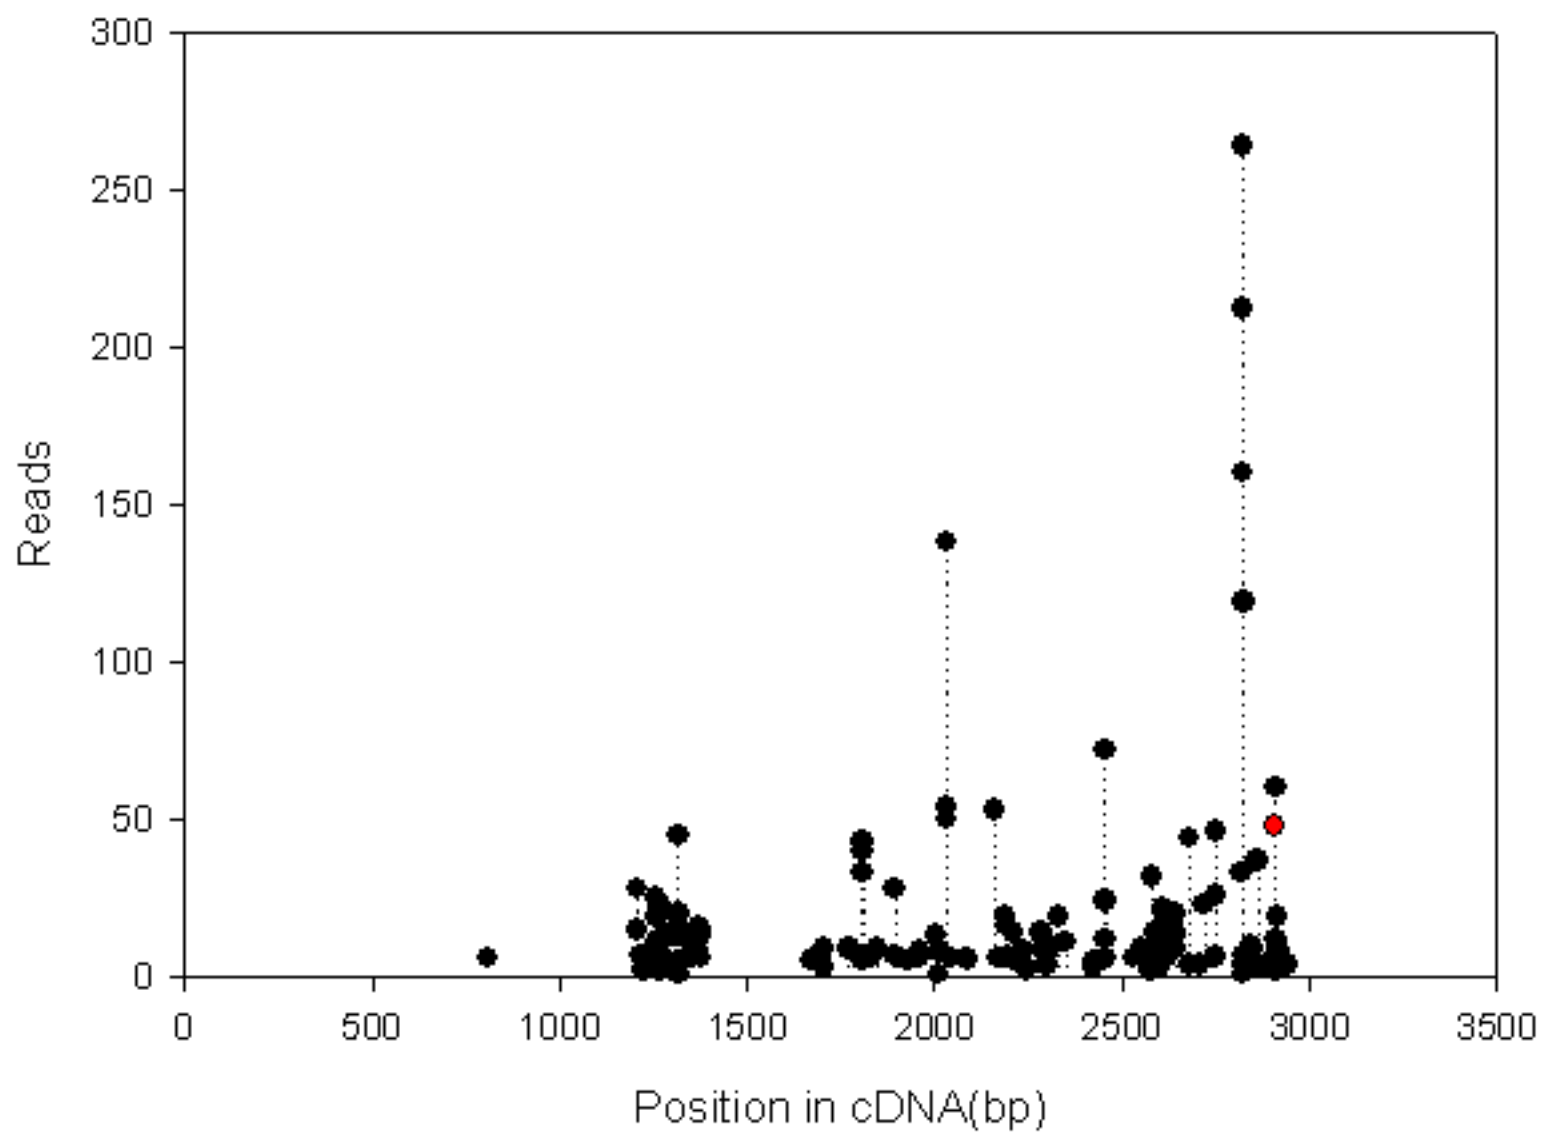

```

5' UGGGAGGAUAUCCUUGGCUGGAUUGU 3'          Cs7g06000.1
... ..
3' GCCGUUCAGUAGGAACCGACG----- 5'        Csi-miR169m.3

```



Csi-miR171a.1, target=Cs2g24890.1 gene=Cs2g24890  
 Category=3  
 Score=5  
 Cleavage Site=778

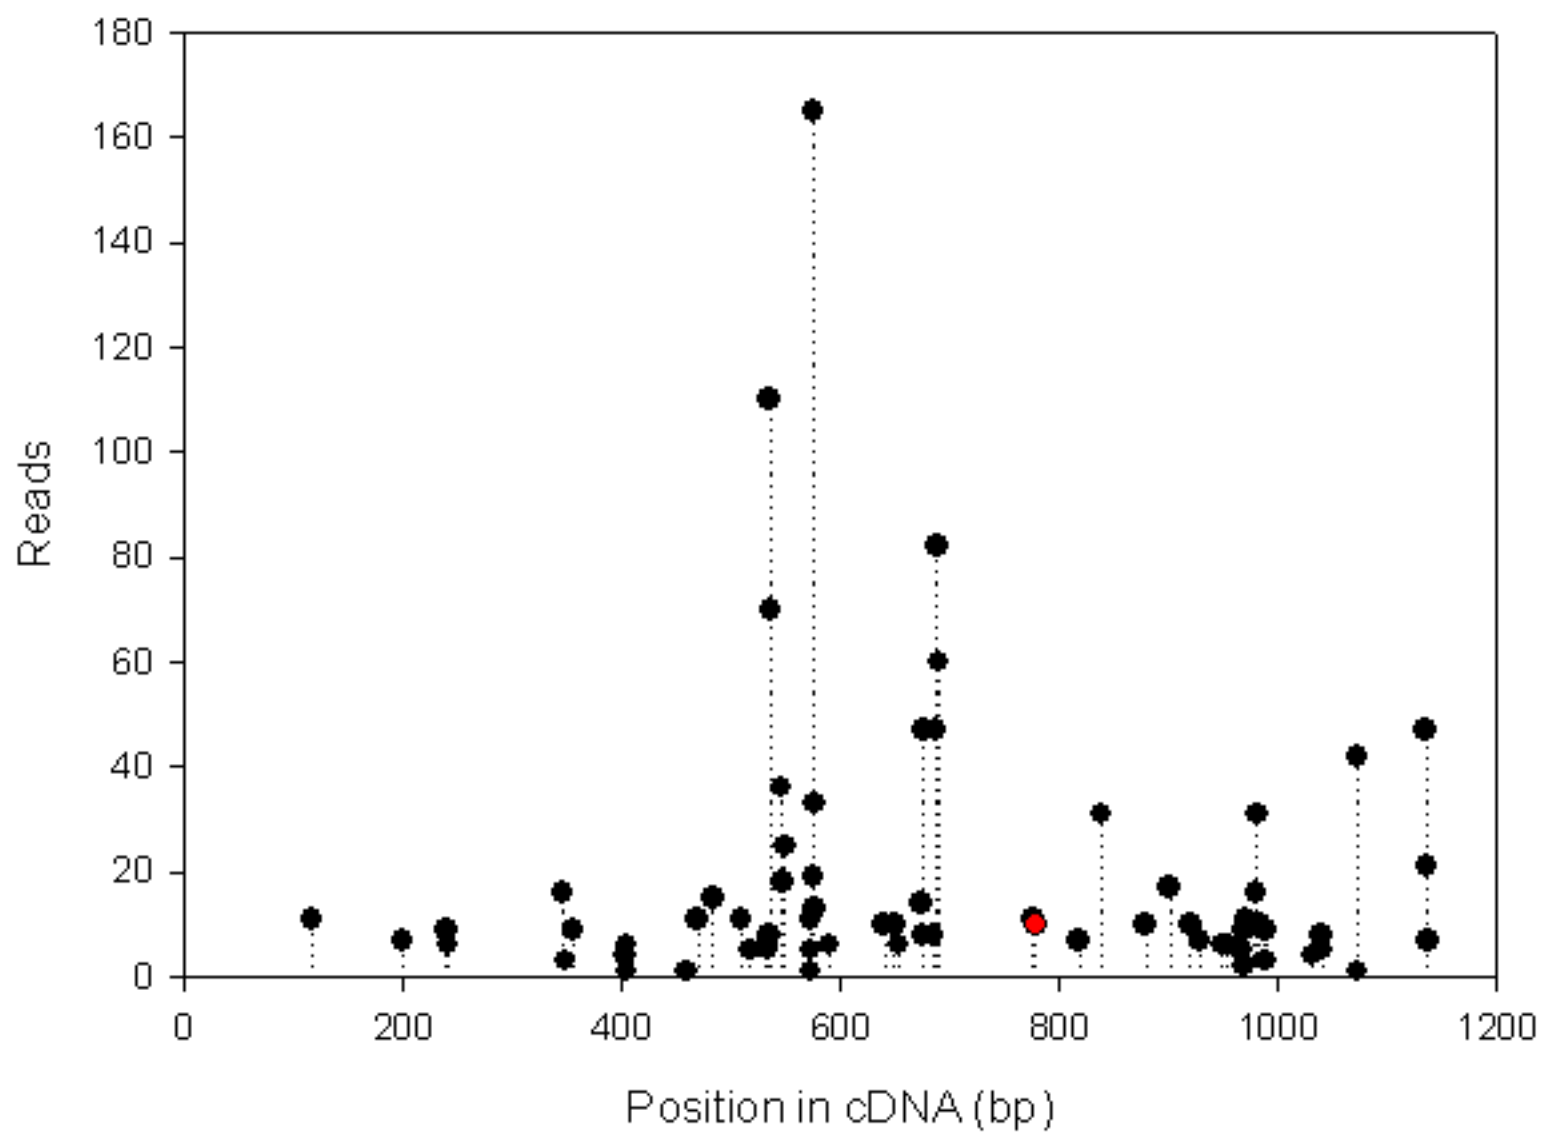

5' ACGUUUGAUUGCAGCUAUUCCAGCAU 3'

Cs2g24890.1

..... : : : . : : : : : :

3' ---AAACUAAC-UCGGCAAGGUUGU- 5'

Csi-miR171a.1

Csi-miR171b, target=Cs4g09320.1 gene=Cs4g09320  
 Category=3  
 Score=4  
 Cleavage Site=527

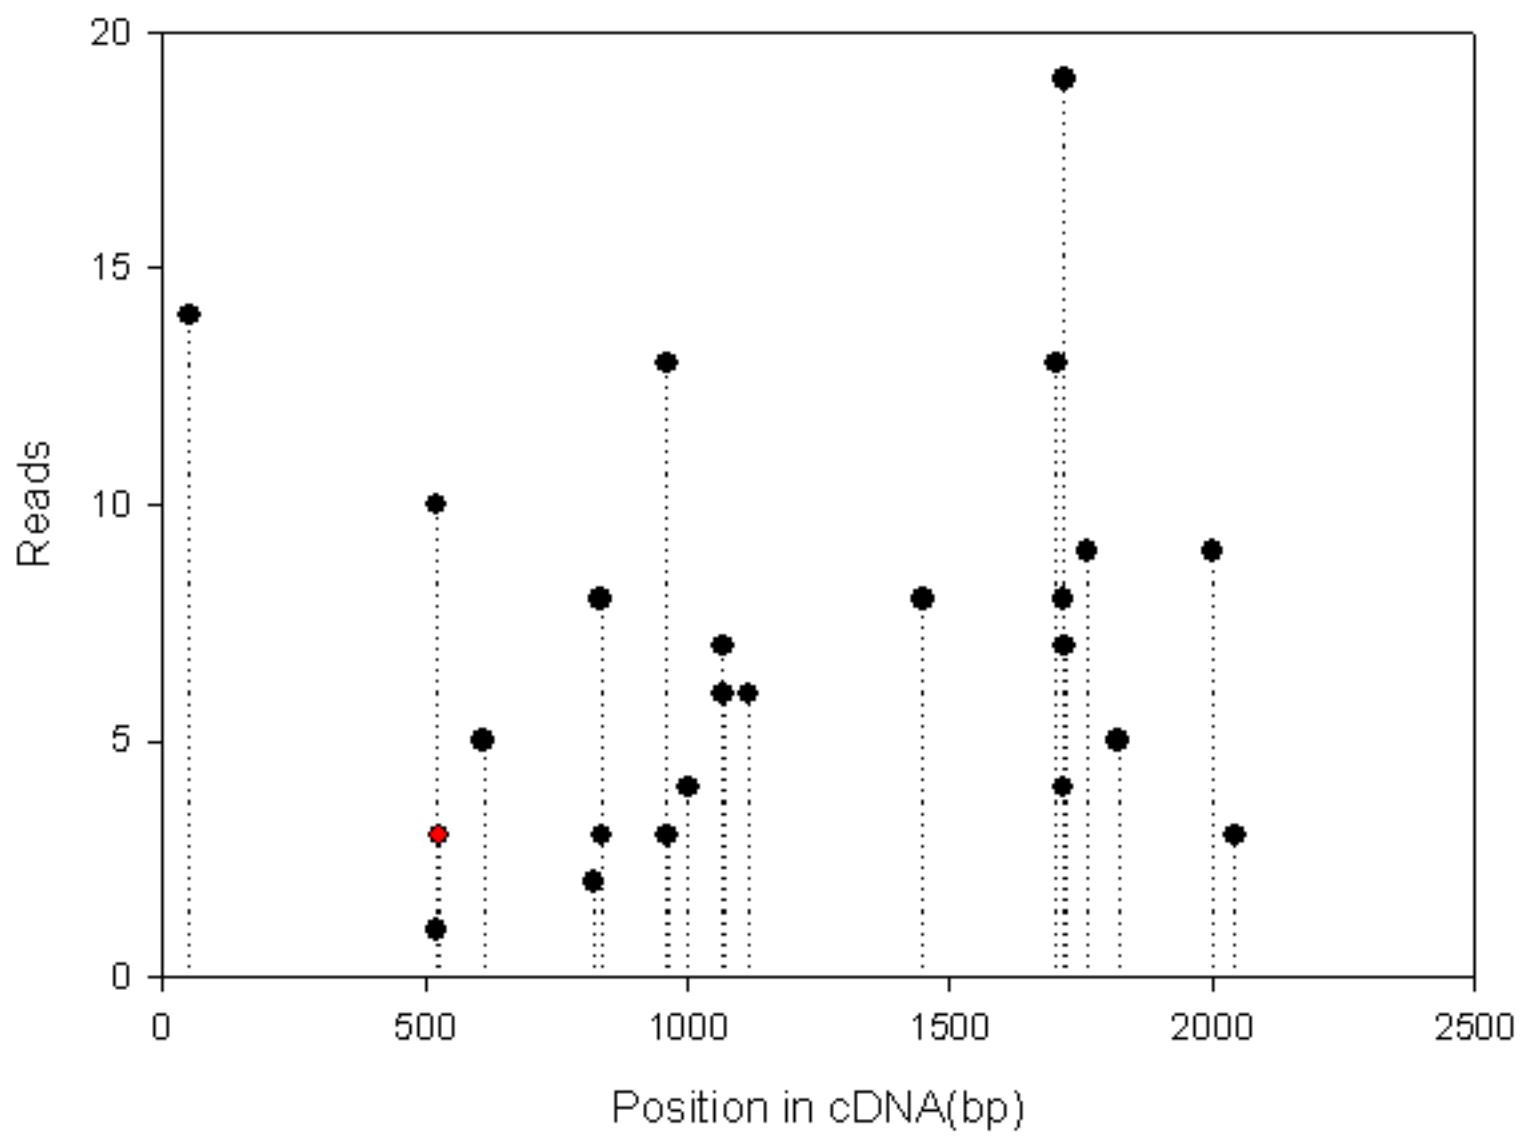

```

5' AAGAGCGAGAAUUGAUUCGGCUUGAG 3'      Cs4g09320.1
   :::  ::  ::::::::::::::::::::
3' --CUCACU-AUAACUAAGCCGAGC-- 5'      Csi-miR171b
  
```

Csi-miR171d, target=Cs9g19410.1 gene=Cs9g19410  
 Category=3  
 Score=4.5  
 Cleavage Site=1275

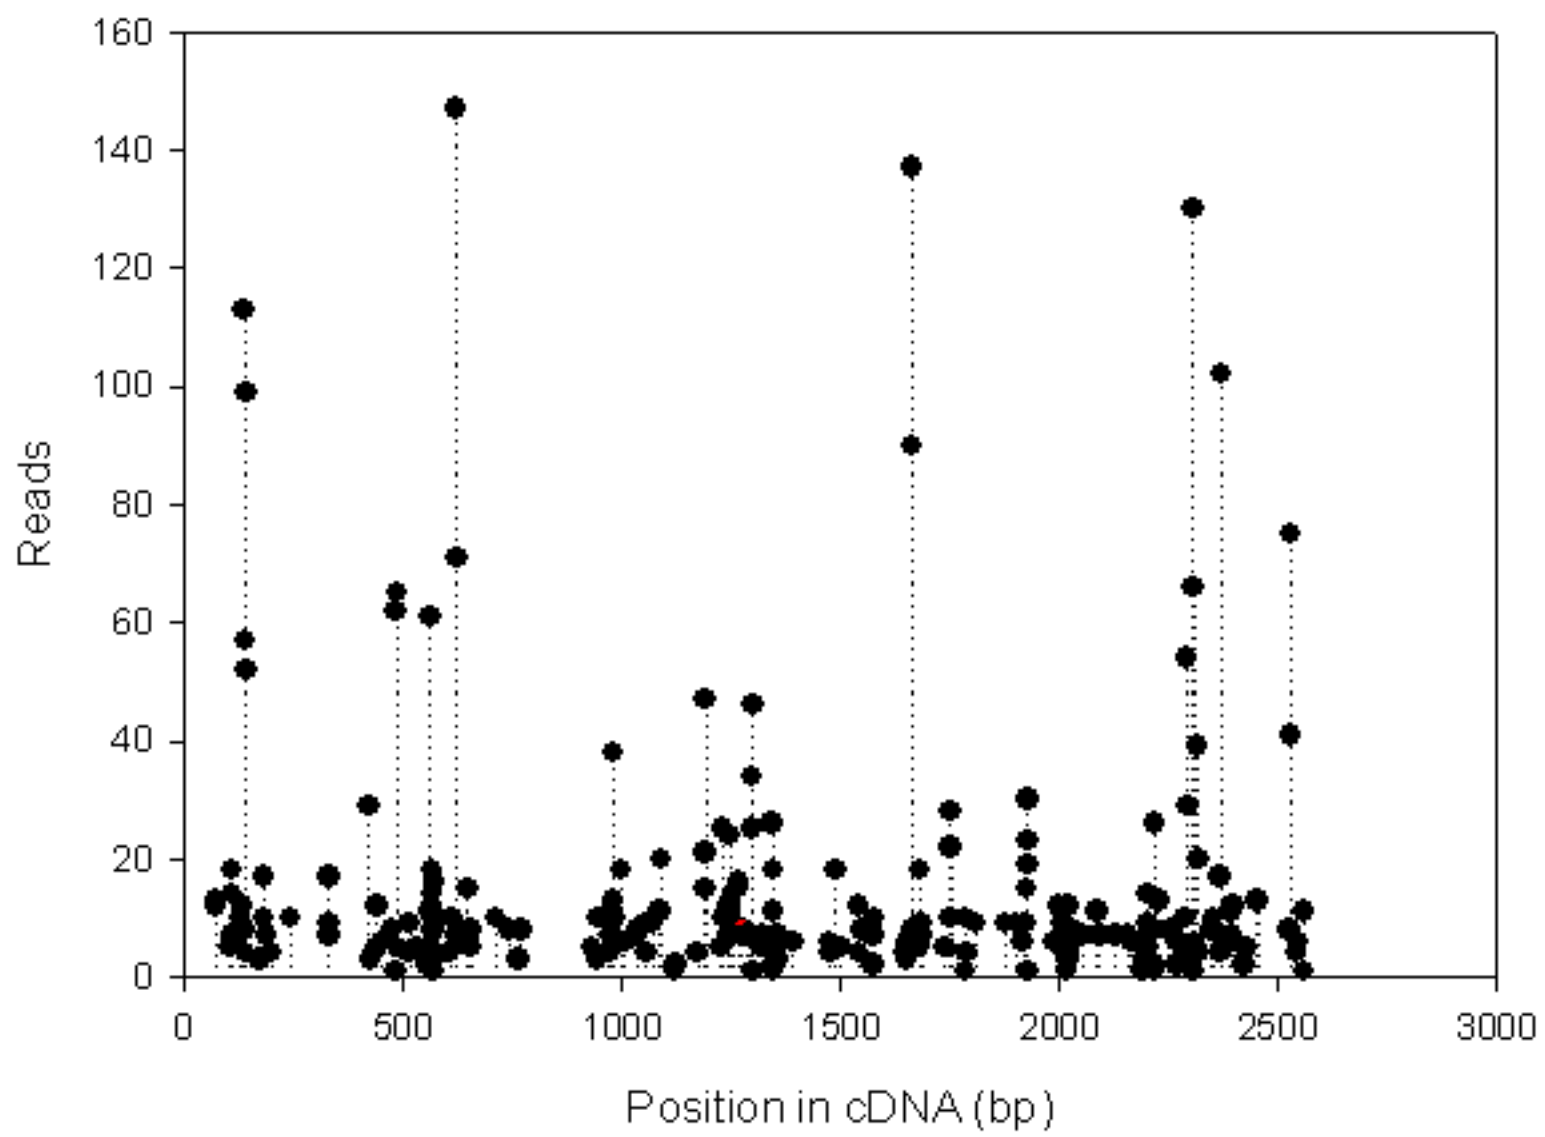

```

5' CGAGAUCUUGACGCGGCUGAGCCAGG 3'      Cs9g19410.1
   ::::: ::::::::::::::: ..
3' CCUCUAUAACUGCGCCGAGUU----- 5'      Csi-miR171d
  
```

Csi-miR171g.1, target=Orange1.1t00199.1 gene=Orange1.1t00199  
 Category=1  
 Score=1  
 Cleavage Site=1615

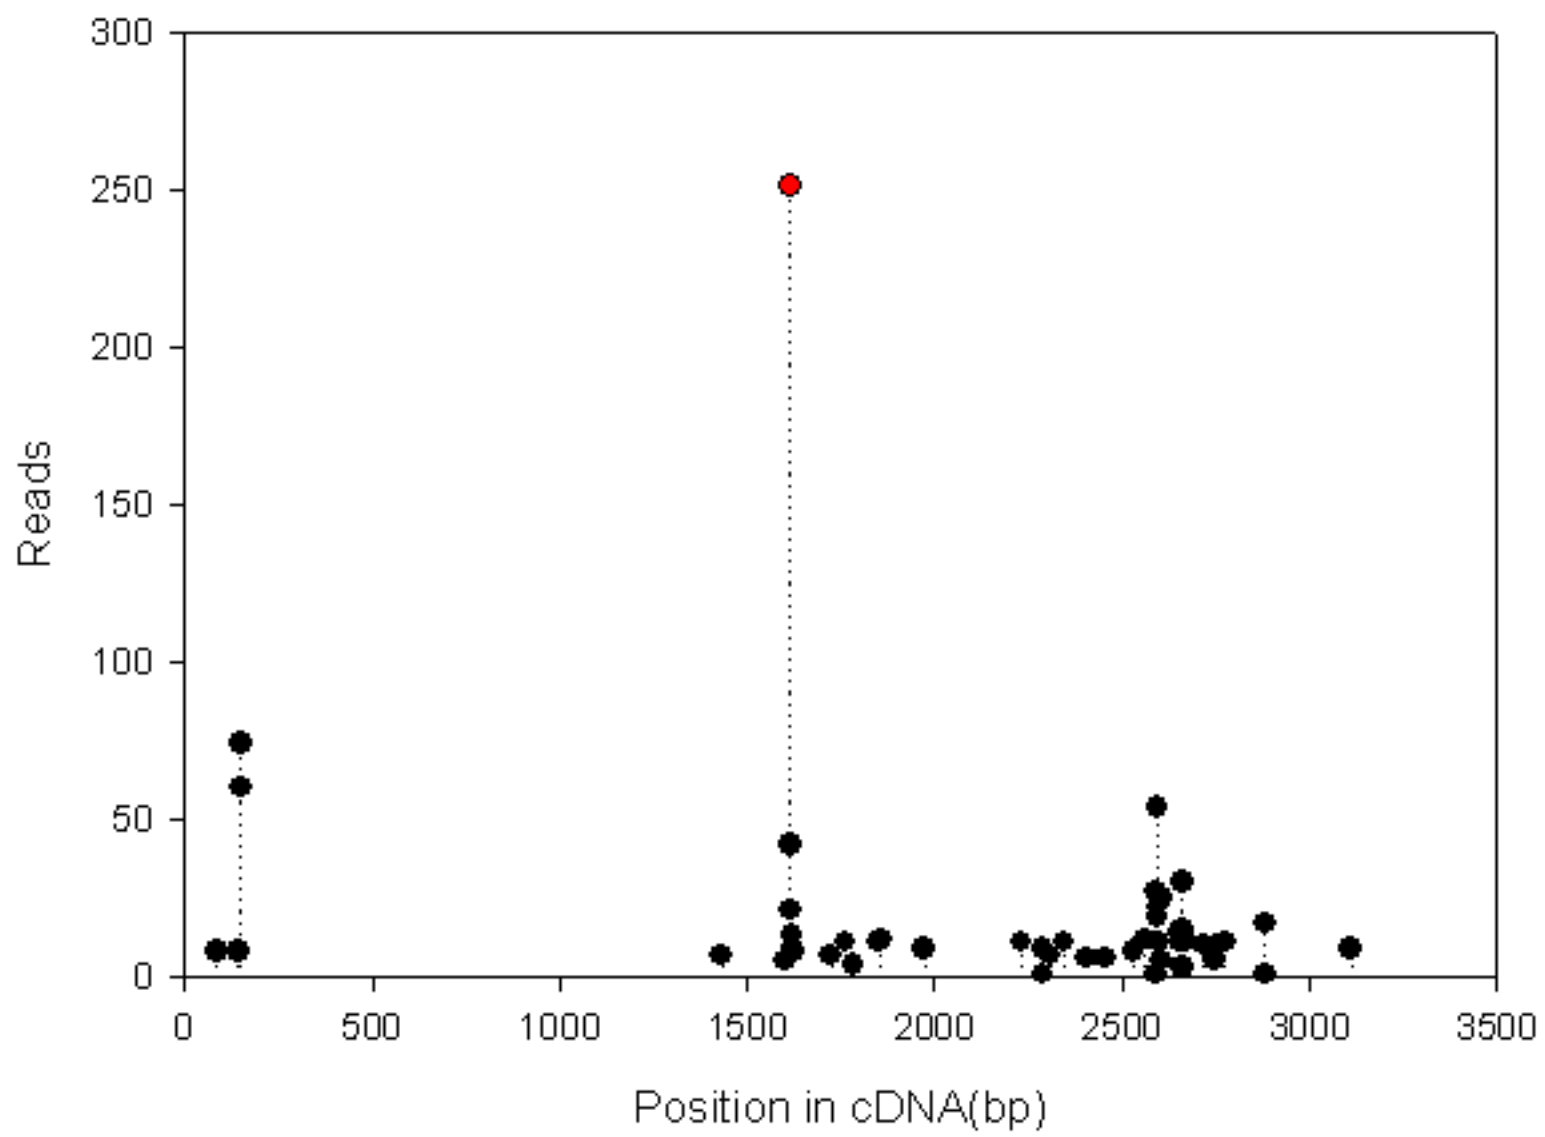

```

5'  GGAUAUUGGCGCGGCUCAAUCCAG 3'      Orange1.1t00199.1
      ::::::::::::::::::::
3'  -CUAUAACCGUGCCGAGUUAGU---- 5'      Csi-miR171g.1
  
```

Csi-miR171g.1, target=Orange1.1t00200.1 gene=Orange1.1t00200  
 Category:1  
 Score=1  
 Cleavage Site=1514

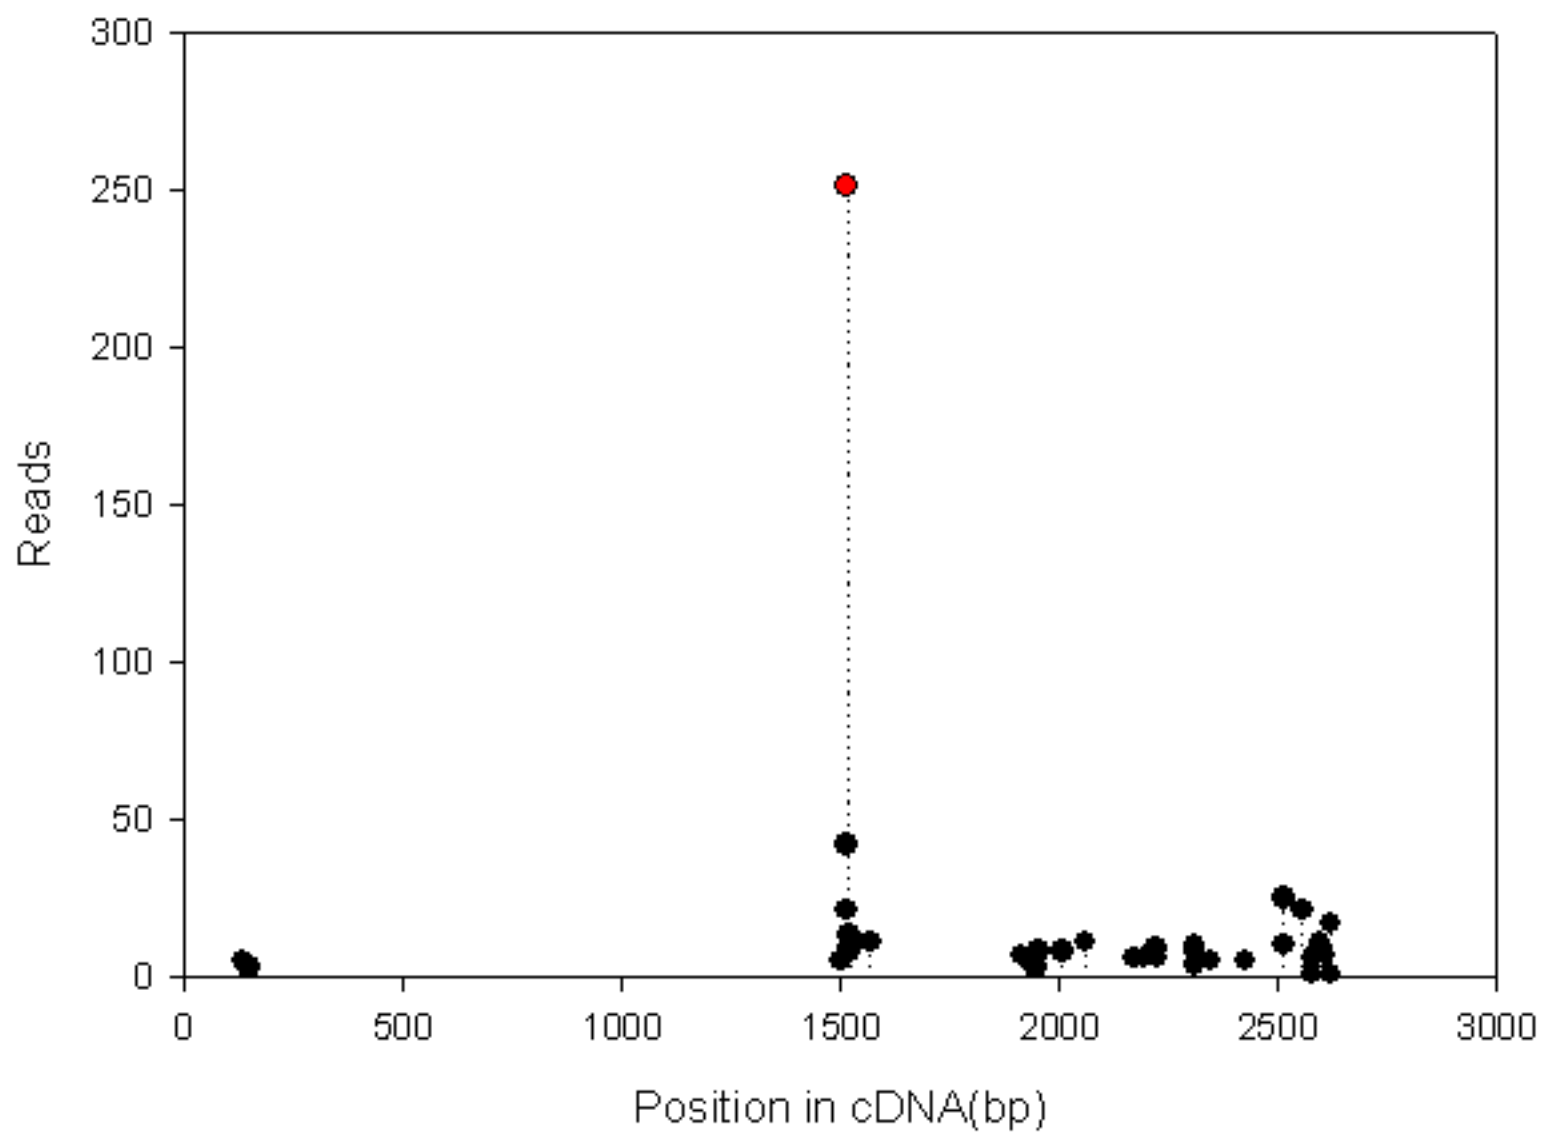

```

5' GGAUAUUGGCGCGGCUCAAUACACAG 3'
   ::::::::::::::::::::::::::::
3' -CUAUAACCGUGCCGAGUUAGU----- 5'

```

Orange1.1t00200.1  
 Csi-miR171g.1

Csi-miR172a-3p.1, target=Cs8g17390.1 gene=Cs8g17390  
Category:3  
Score=2  
Cleavage Site=1865

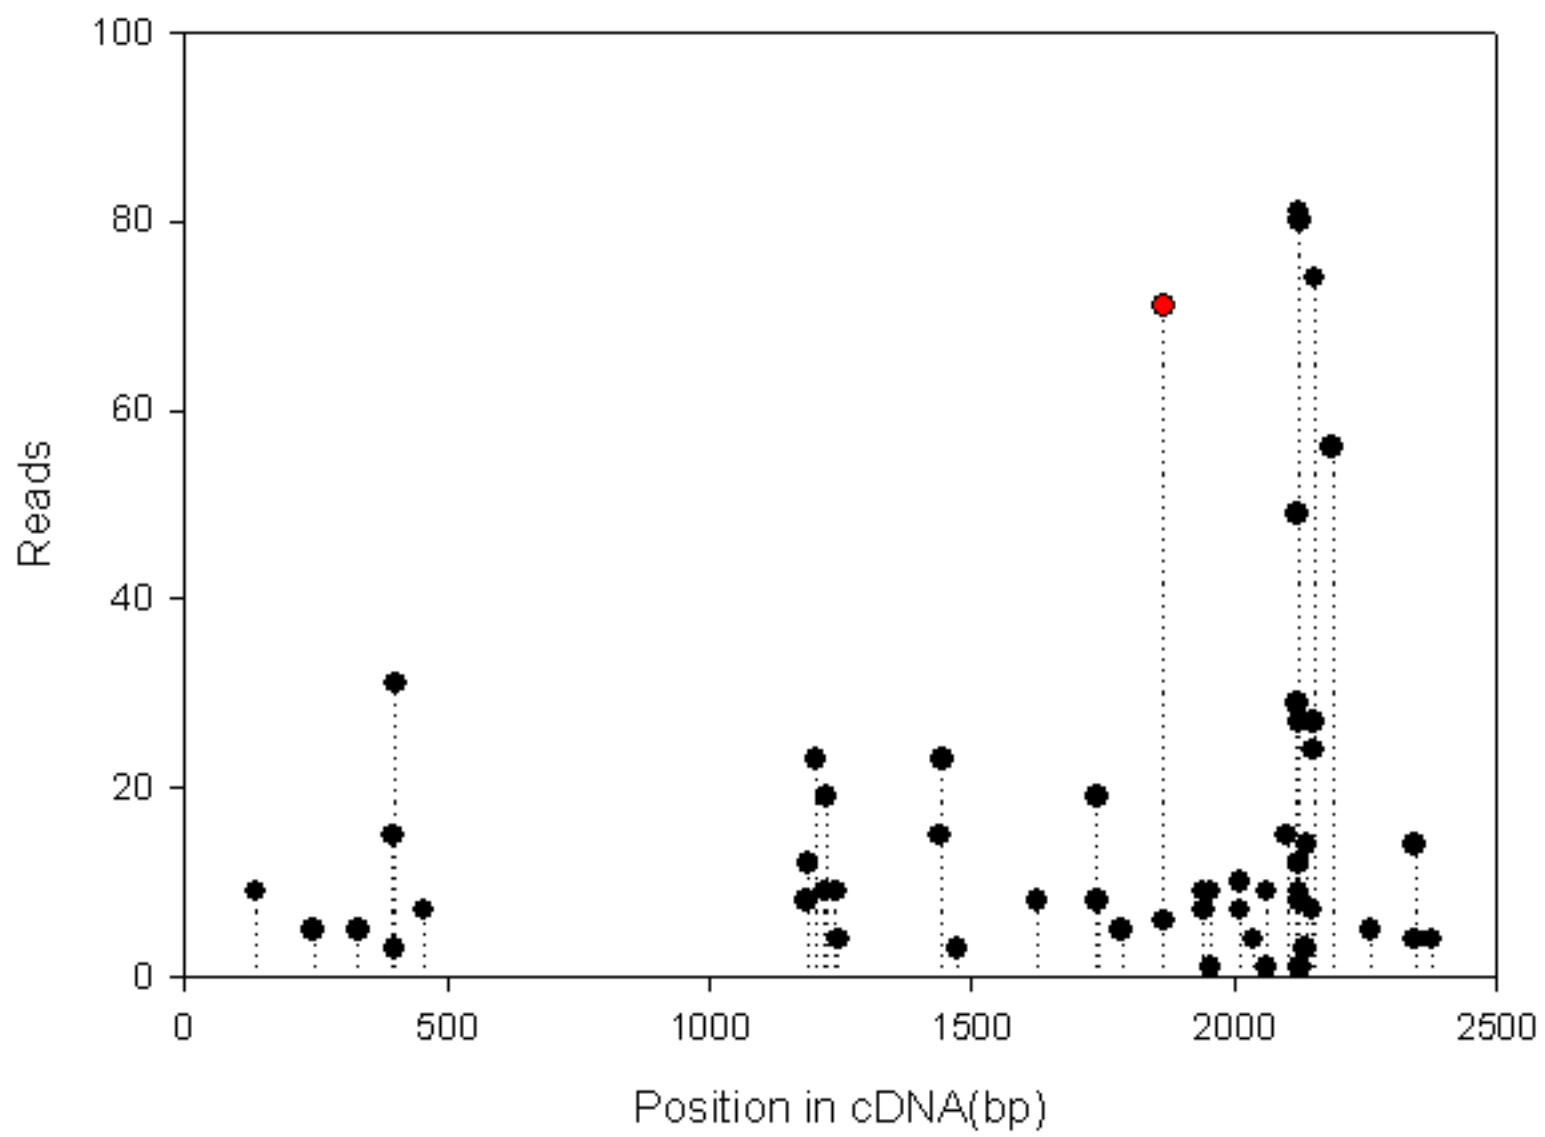

```
5' AGUGCAGCAUCAUCAGGAUCCCAU 3' Cs8g17390.1
   .....
```

```
3' --ACGUCGUAGUAGUUCUAAGA---- 5' Csi-miR172a-3p.1
```

Csi-miR172a-3p.1, target=Orange1.1t04055.1 gene=Orange1.1t04055  
 Category=3  
 Score=2  
 Cleavage Site=2049

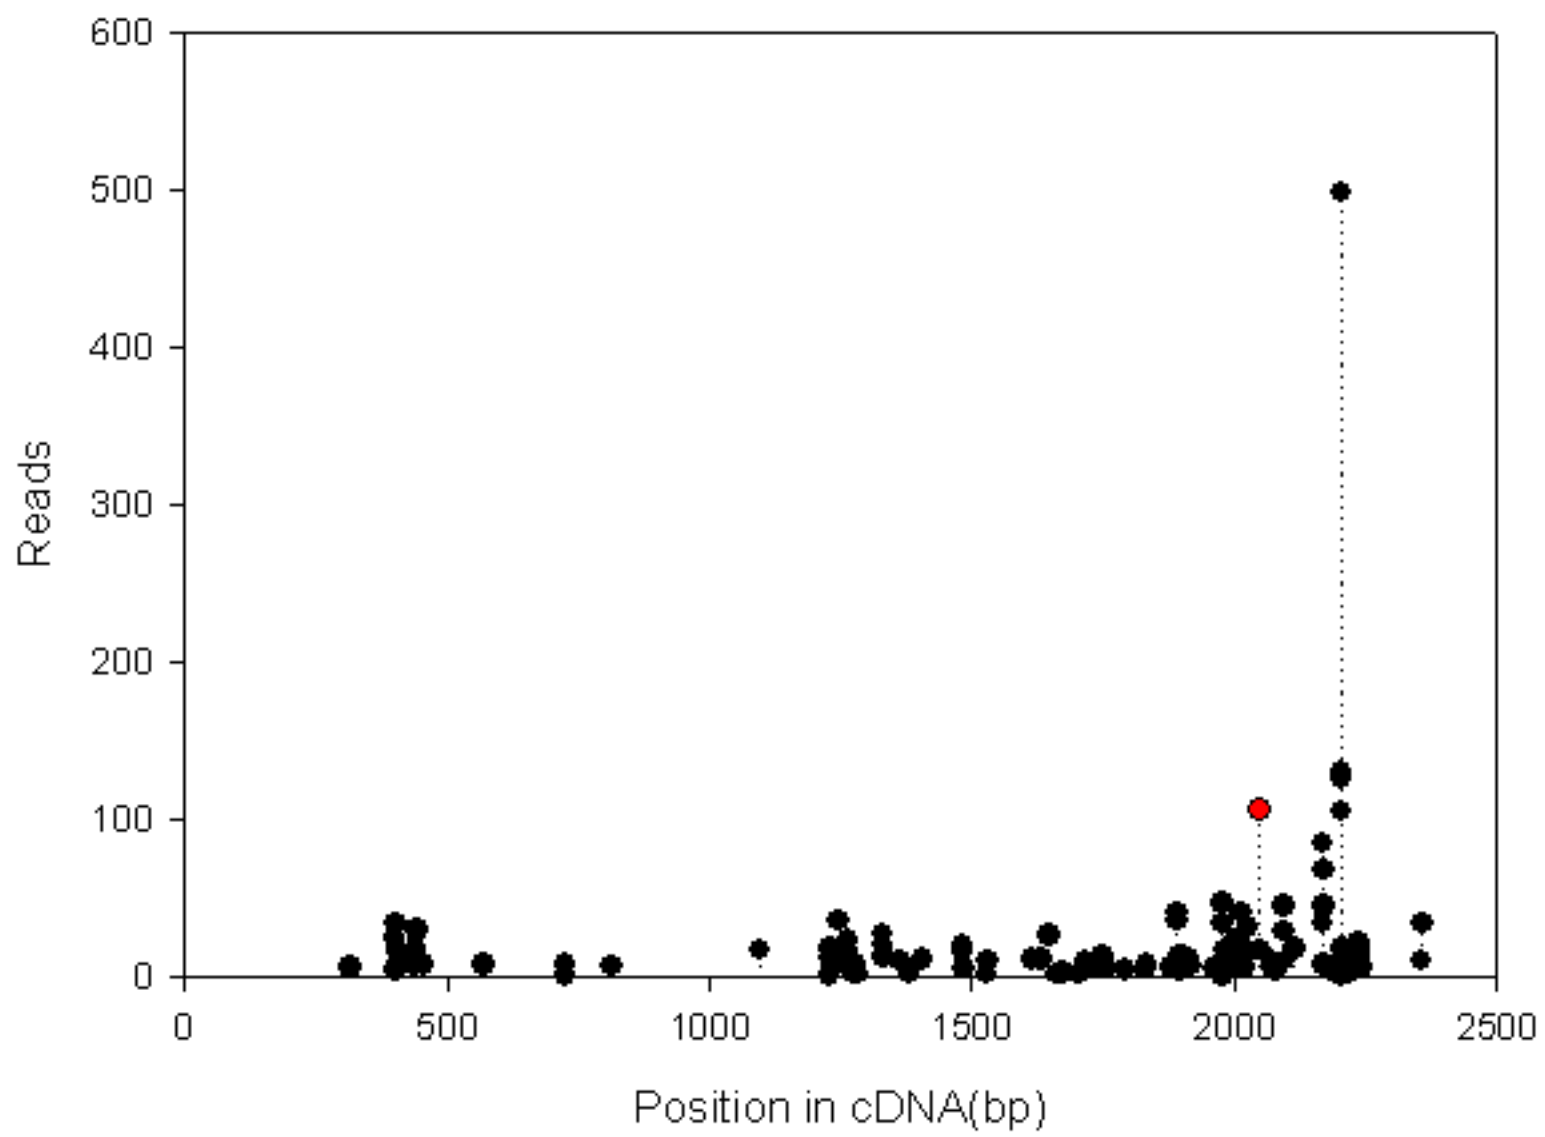

|    |                            |    |                   |
|----|----------------------------|----|-------------------|
| 5' | GCUGCAGCAUCAUCAGGAUCCCUCA  | 3' | Orange1.1t04055.1 |
|    | .....                      |    |                   |
| 3' | --ACGUCGUAGUAGUUCUAAGA---- | 5' | Csi-miR172a-3p.1  |

Csi-miR172a-3p.2, target=Cs8g17390.1 gene=Cs8g17390

Category:3

Score=3

Cleavage Site=1865

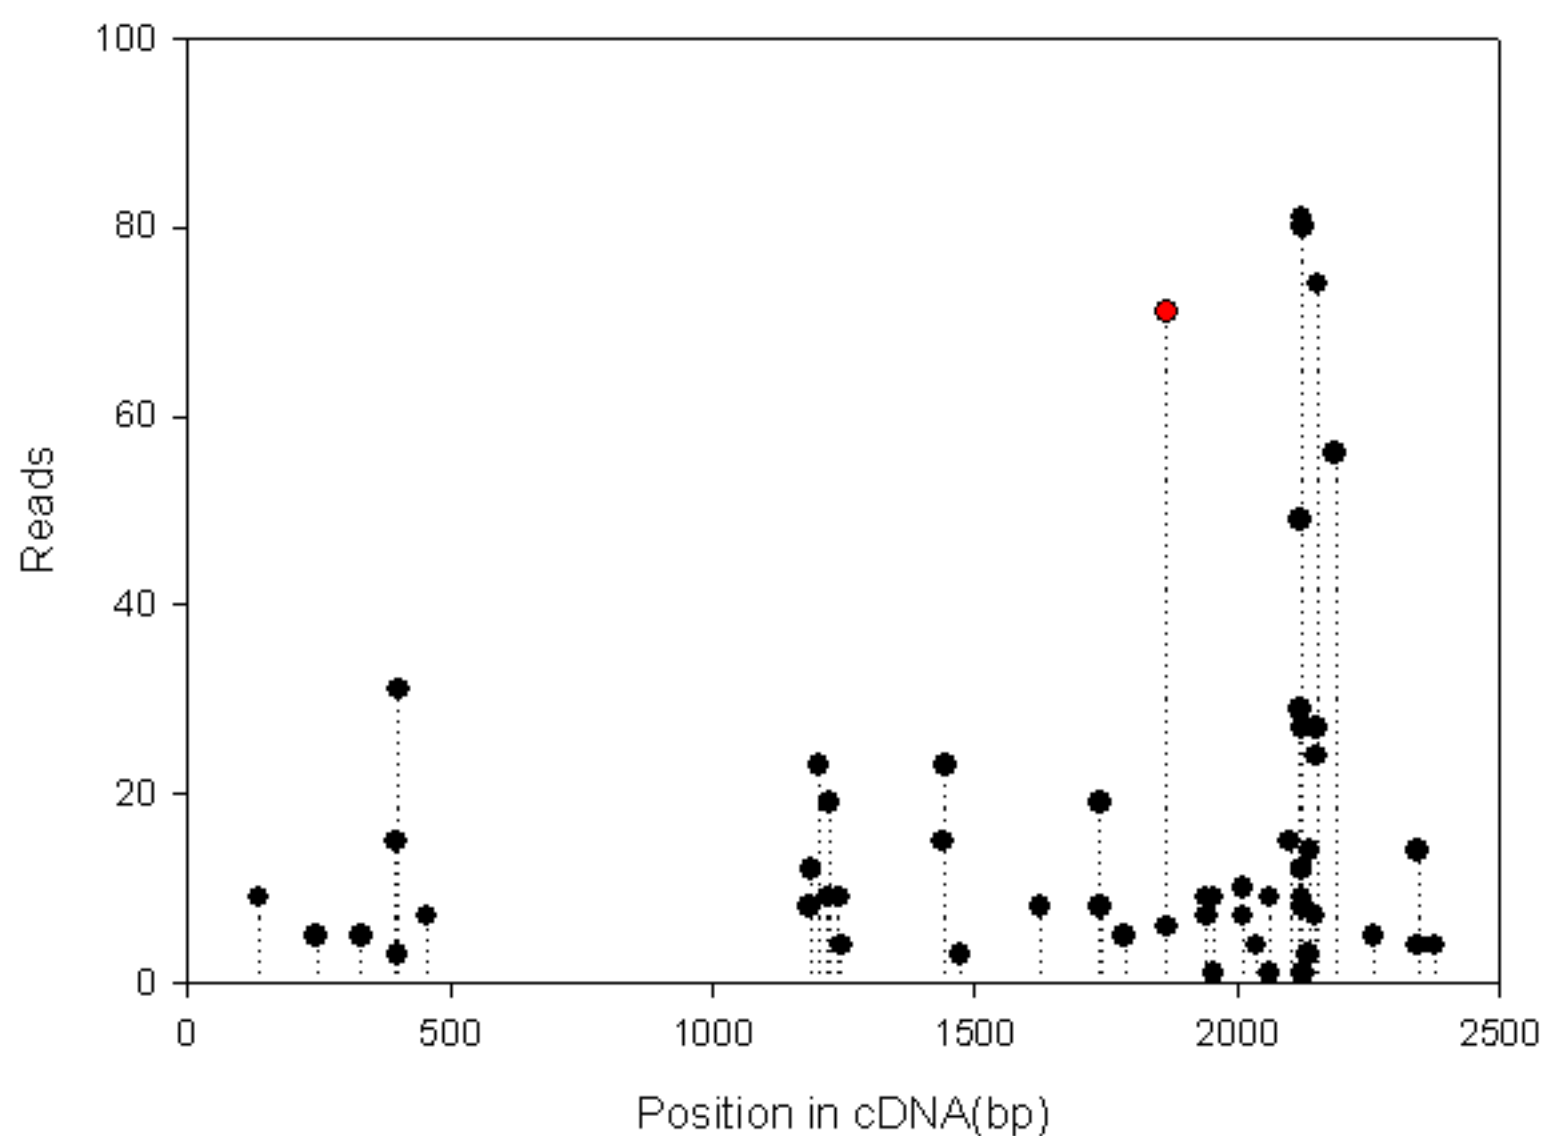

5' AGUGCAGCAUCAUCAGGAUCCCAUU 3'

Cs8g17390.1

.....

3' -AACGUCGUAGUAGUUCUAAGA---- 5'

Csi-miR172a-3p.2



Csi-miR172a-3p.2, target=Orange1.1t04055.1 gene=Orange1.1t04055  
 Category=3  
 Score=3  
 Cleavage Site=2049



5' GCUGCAGCAUCAUCAGGAUCCCUCA 3'  
 :::::::::::::::::::::  
 3' -AACGUCGUAGUAGUUCUAAGA---- 5'

Orange1.1t04055.1  
 Csi-miR172a-3p.2

Csi-miR172a-3p.3, target=Cs8g17390.1 gene=Cs8g17390

Category:3

Score=2

Cleavage Site=1865

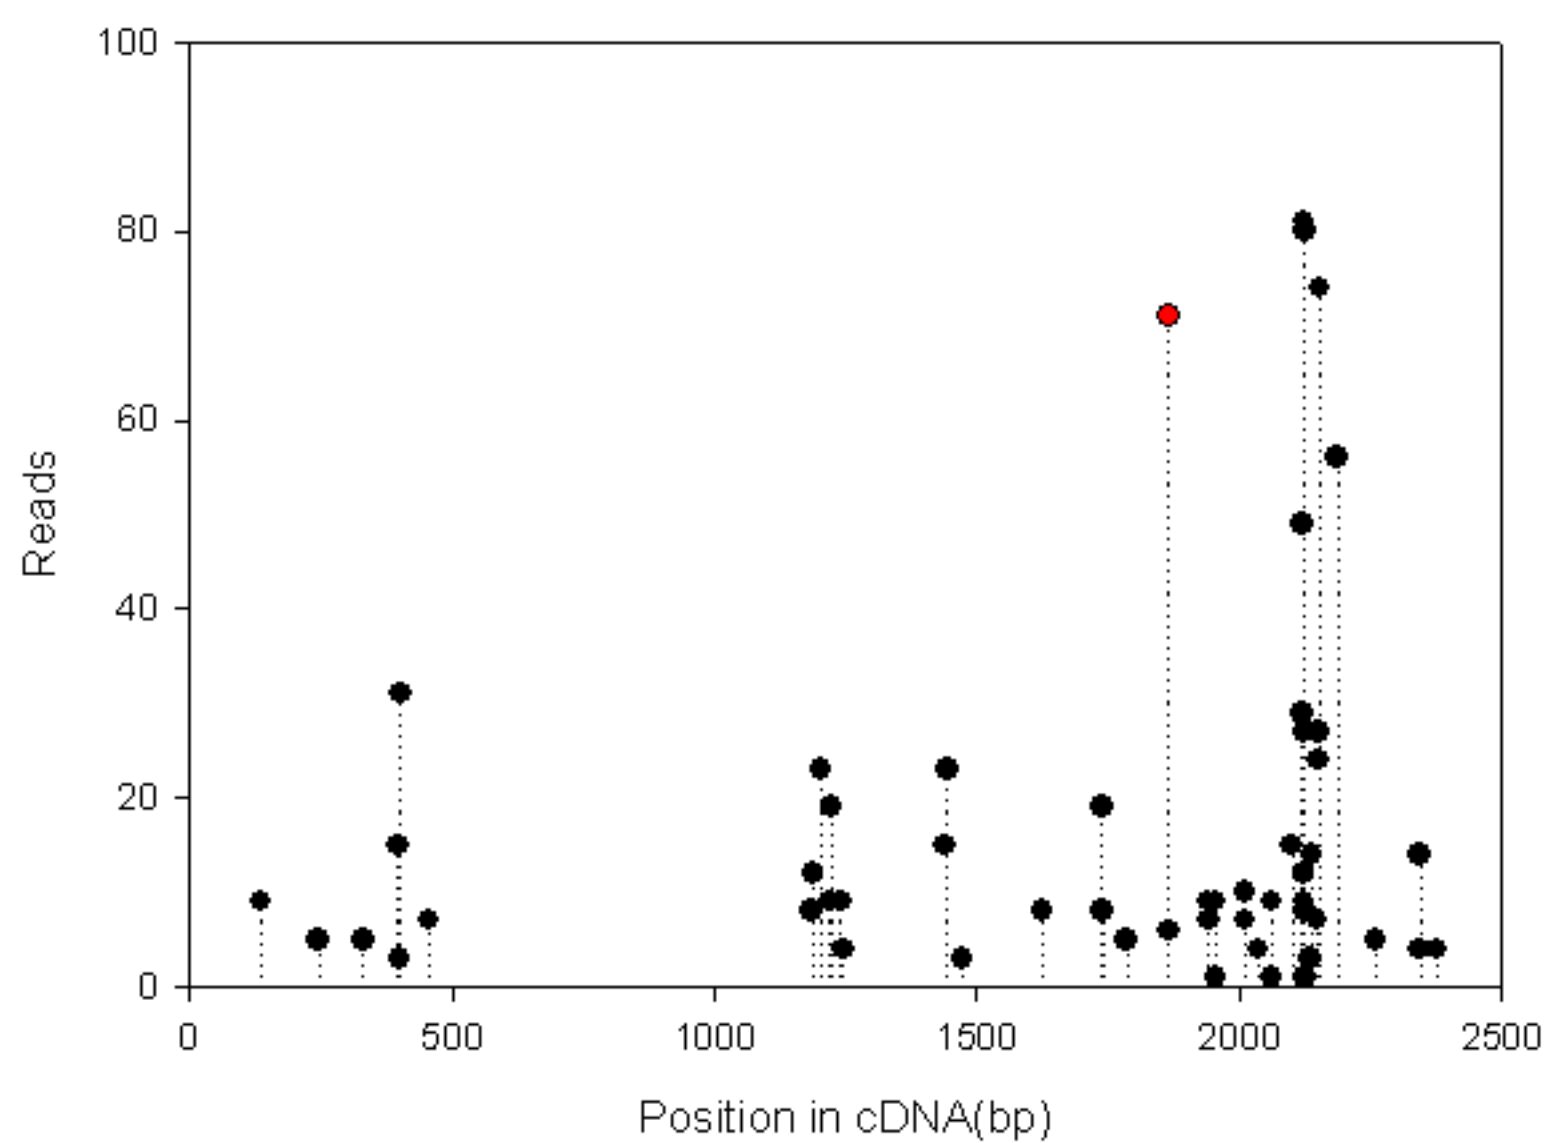

5' AGUGCAGCAUCAUCAGGAUCCCAUU 3'

Cs8g17390.1

.....

3' -AACGUCGUAGUAGUUCUAAG----- 5'

Csi-miR172a-3p.3

Csi-miR172a-3p.3, target=Orange1.1t04055.1 gene=Orange1.1t04055  
 Category=3  
 Score=2  
 Cleavage Site=2049



```

5' GCUGCAGCAUCAUCAGGAUCCCUCA 3'           Orange1.1t04055.1
   ::::::::::::::::::::
3' -AACGUCGUAGUAGUUCUAAG----- 5'       Csi-miR172a-3p.3

```

Csi-miR172c.1, target=Cs1g21180.1 gene=Cs1g21180  
 Category:3  
 Score=4  
 Cleavage Site=3253

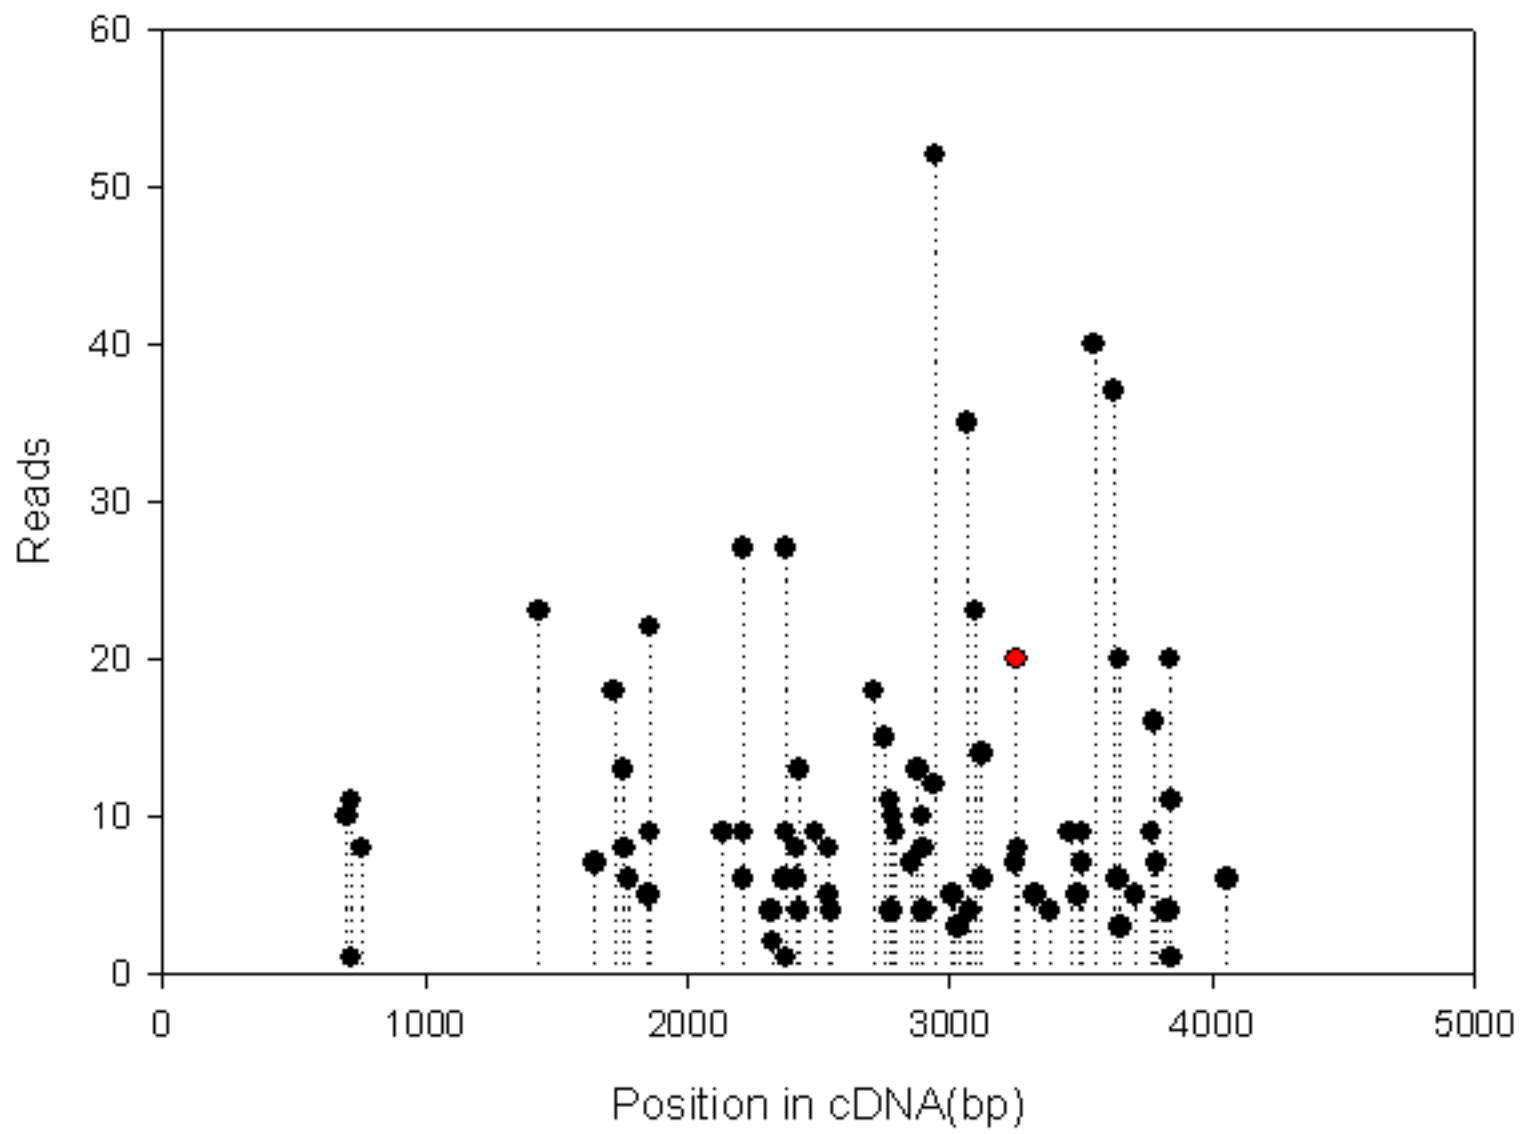

```

5' GUAGAUAAAG-AUCAUUAAGAUUUCUGA 3'      Cs1g21180.1
   :: ::::::::::::::::::::
3' -----UCGUAGUAGUUCUAAGGU-- 5'      Csi-miR172c.1

```

Csi-miR172c.1, target=Cs3g06140.1 gene=Cs3g06140  
 Category:1  
 Score=4.5  
 Cleavage Site=480

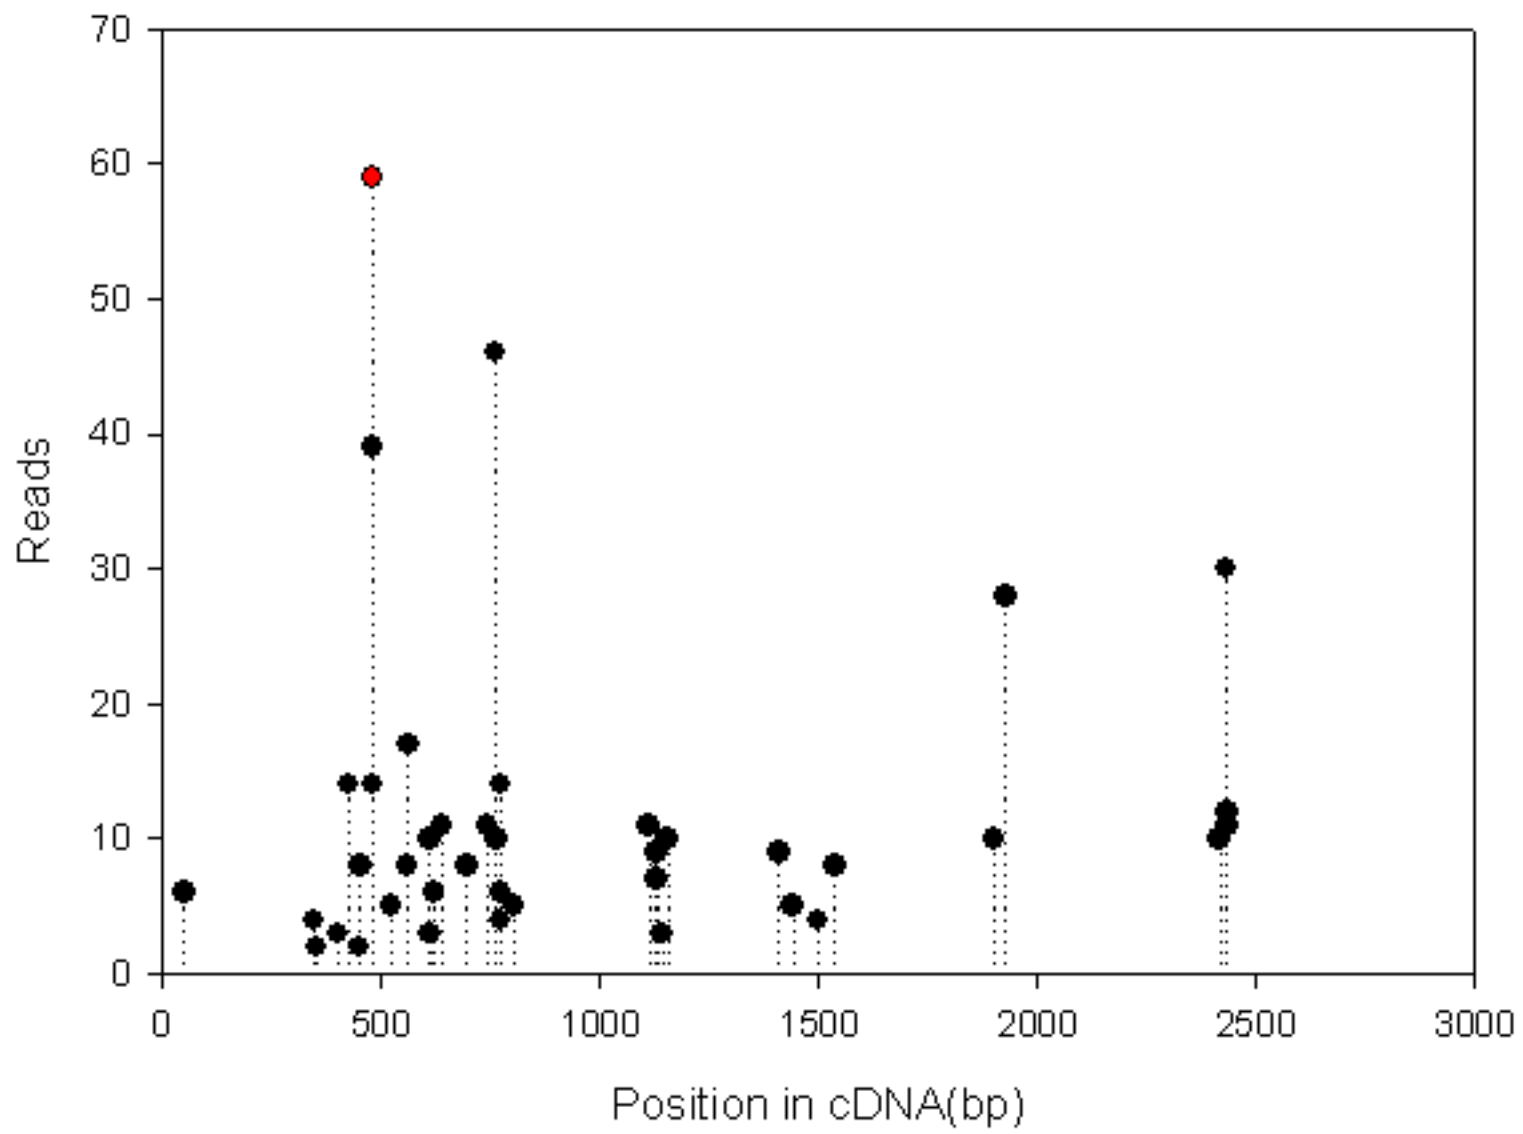

```

5'  UGAGUCUGCCACCAUUAAGAUUCCUG  3'          Cs3g06140.1
      .  ::  :::::~::~:~::~:
3'  -----UCGUAGUAGUUCUAAGGU-  5'          Csi-miR172c.1
  
```

Csi-miR172c.1, target=Cs8g17390.1 gene=Cs8g17390  
 Category:3  
 Score=2  
 Cleavage Site=1865

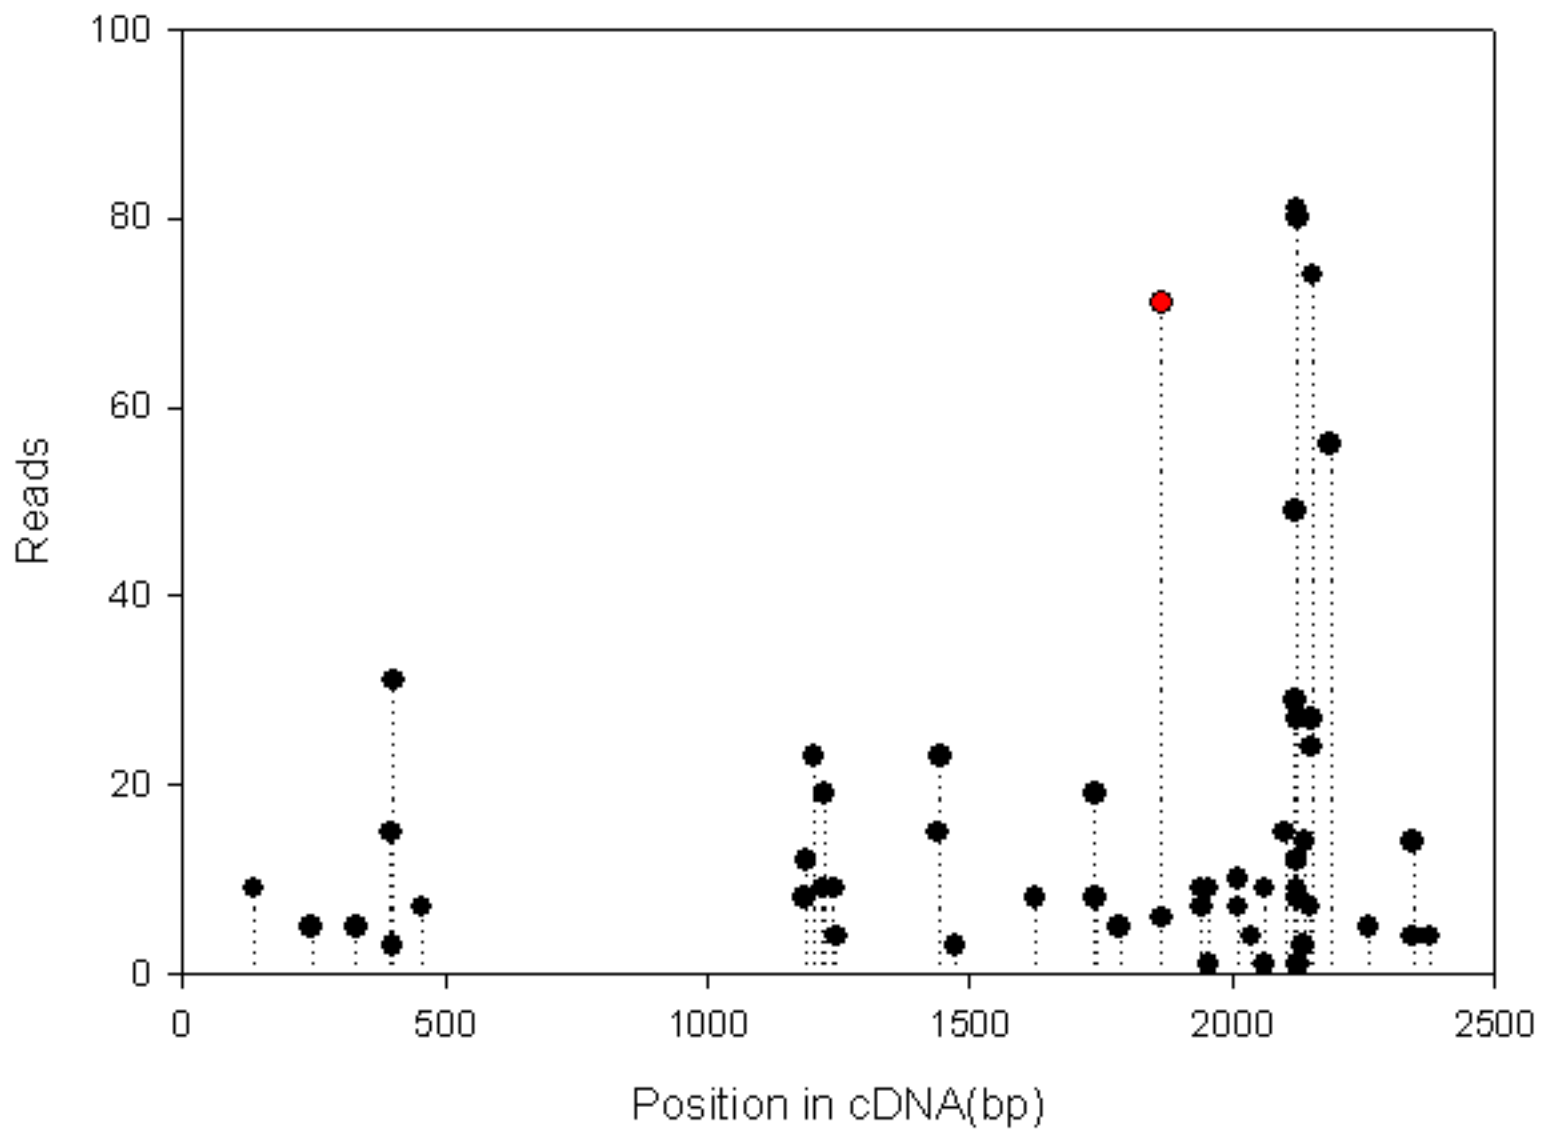

```

5' AGUGCAGCAUCAUCAGGAUCCCAUU 3'          Cs8g17390.1
   ::::::::::::::::::::
3' -----UCGUAGUAGUUCUAAGGU--- 5'        Csi-miR172c.1
  
```

Csi-miR172c.1, target=Orange1.1t04055.1 gene=Orange1.1t04055  
 Category=3  
 Score=2  
 Cleavage Site=2049

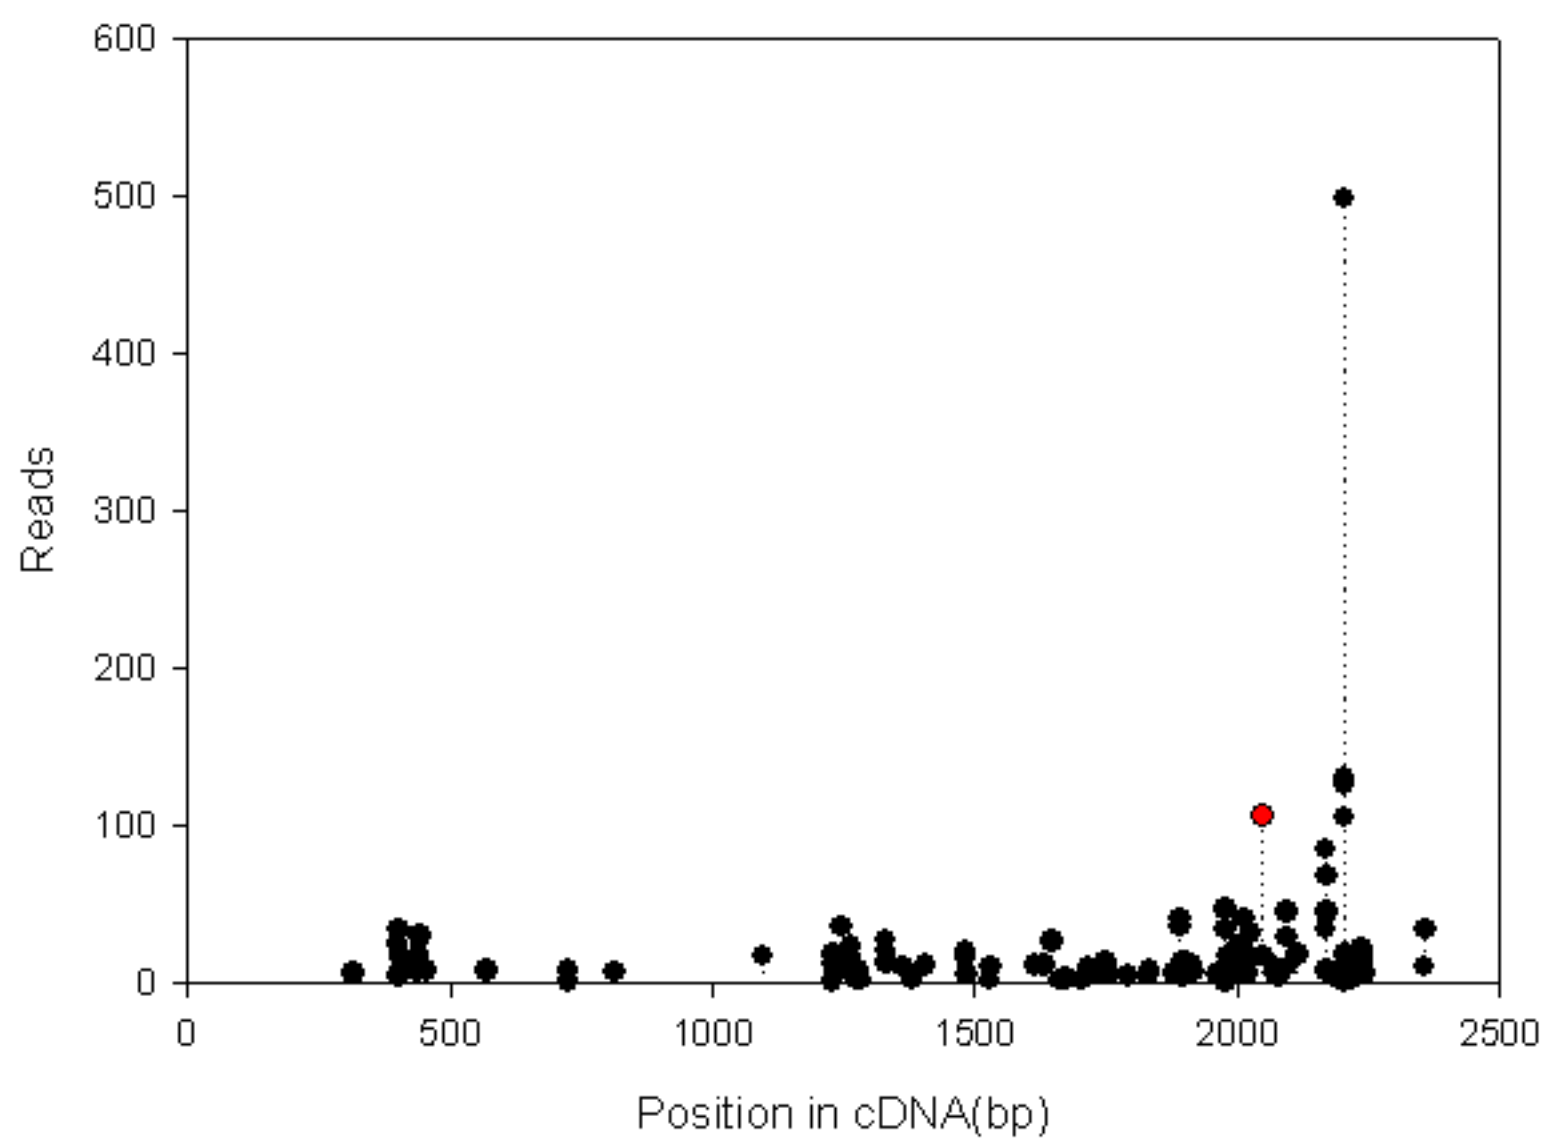

```

5' GCUGCAGCAUCAUCAGGAUCCCUCA 3'      Orange1.1t04055.1
      ::::::::::::::::::::
3' -----UCGUAGUAGUUCUAAGGU--- 5'      Csi-miR172c.1
  
```

Csi-miR172c.2, target=Cs8g17390.1 gene=Cs8g17390  
 Category:3  
 Score=3  
 Cleavage Site=1865



```

5' AGUGCAGCAUCAUCAGGAUUCCTCAU 3'      Cs8g17390.1
   ::::::::::::::::::::
3' -GACGUCGUAGUAGUUCUAAGGU--- 5'      Csi-miR172c.2
  
```



Csi-miR172c.2, target=Orange1.1t04055.1 gene=Orange1.1t04055  
 Category=3  
 Score=2  
 Cleavage Site=2049



|                                                                     |                   |
|---------------------------------------------------------------------|-------------------|
| 5' GCUGCAGCAUCAUCAGGAUCCCUCA 3'                                     | Orange1.1t04055.1 |
| :  :  :  :  :  :  :  :  :  :  :  :  :  :  :  :  :  :  :  :  :  :  : |                   |
| 3' -GACGUCGUAGUAGUUCUAAGGU--- 5'                                    | Csi-miR172c.2     |

Csi-miR172d, target=Cs8g17390.1 gene=Cs8g17390  
 Category:3  
 Score=2.5  
 Cleavage Site=1865



```

5' AGUGCAGCAUCAUCAGGAUUCCTCAUU 3'      Cs8g17390.1
   . . . . .
3' -UACGUCGUAGUAGUUCUAAGA----- 5'      Csi-miR172d

```

Csi-miR172d, target=Orange1.1t04055.1 gene=Orange1.1t04055  
 Category=3  
 Score=3  
 Cleavage Site=2049

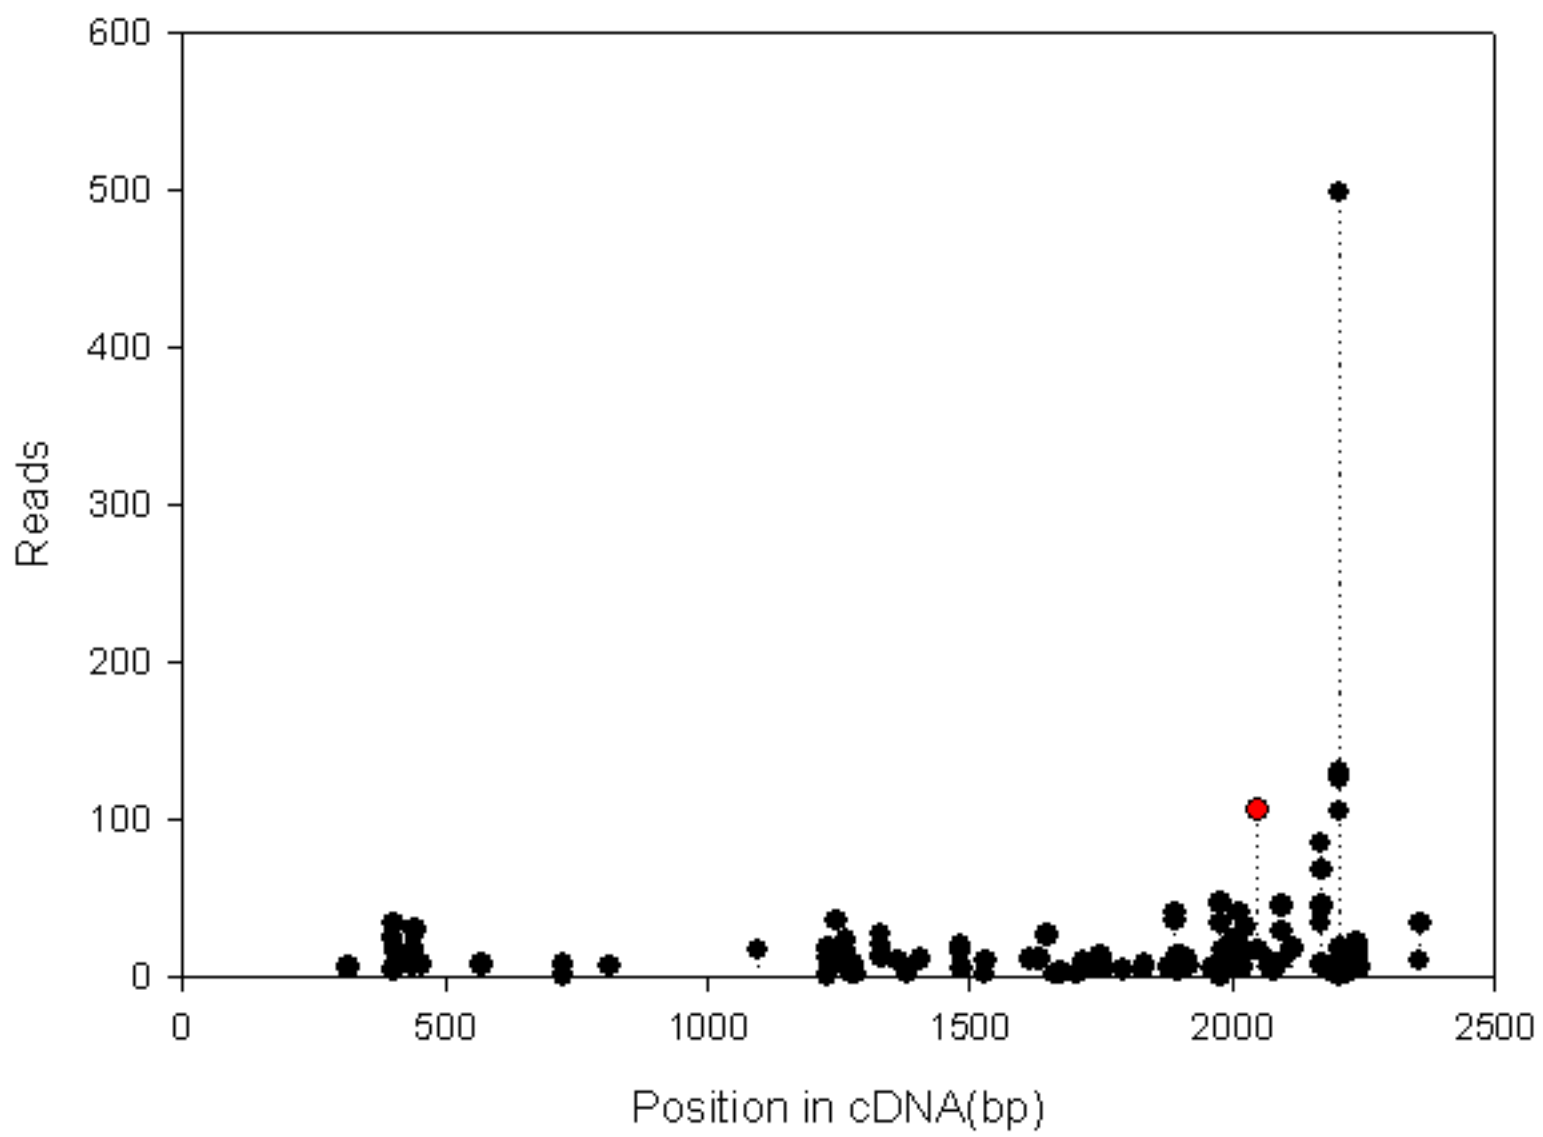

|                                  |                   |
|----------------------------------|-------------------|
| 5' GCUGCAGCAUCAUCAGGAUCCCUCA 3'  | Orange1.1t04055.1 |
| .....                            |                   |
| 3' -UACGUCGUAGUAGUUCUAAGA---- 5' | Csi-miR172d       |

Csi-miR172d-3p, target=Cs9g03090.1 gene=Cs9g03090  
 Category=1  
 Score=4.5  
 Cleavage Site=2765

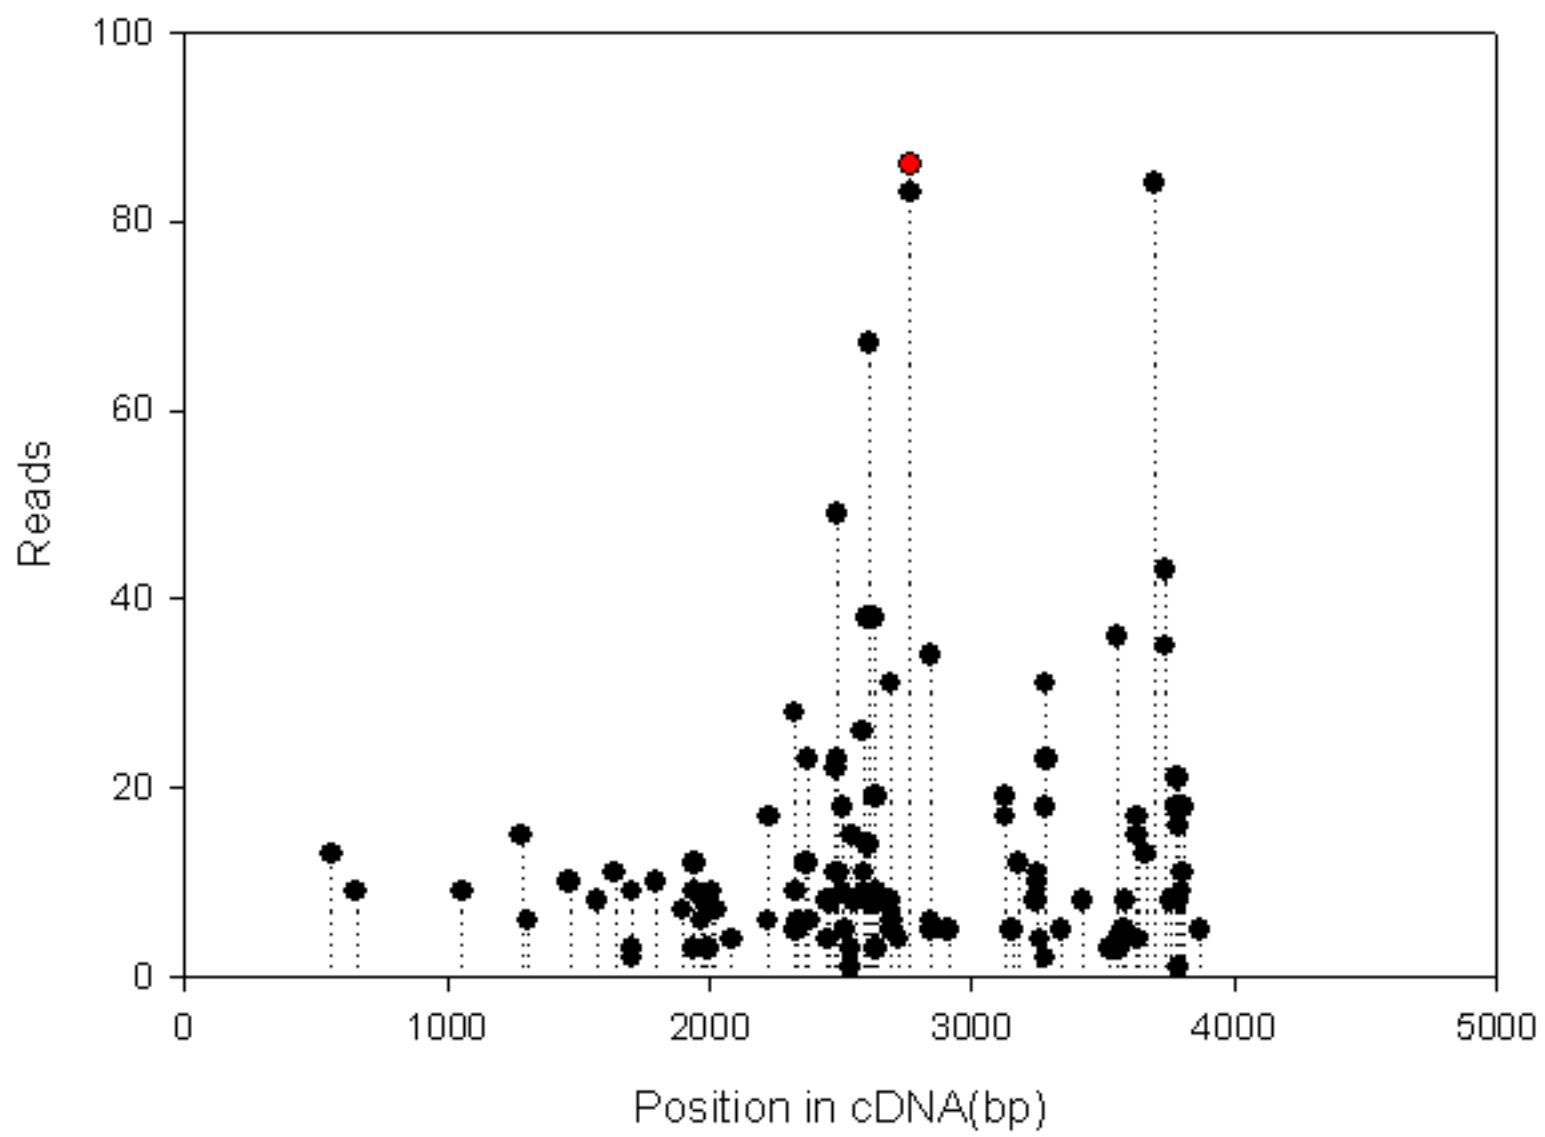

```

5' GCAAUCUGCAUUUUUGAUGAUGUUGC 3'          Cs9g03090.1
   :  :  :  :  :  :  :  :  :  :  :  :  :
3' ----ACAC-UUAGAACUACUACGACG 5'          Csi-miR172d-3p
  
```

Csi-miR172e.2, target=Cs8g17390.1 gene=Cs8g17390  
 Category:3  
 Score=1.5  
 Cleavage Site=1865

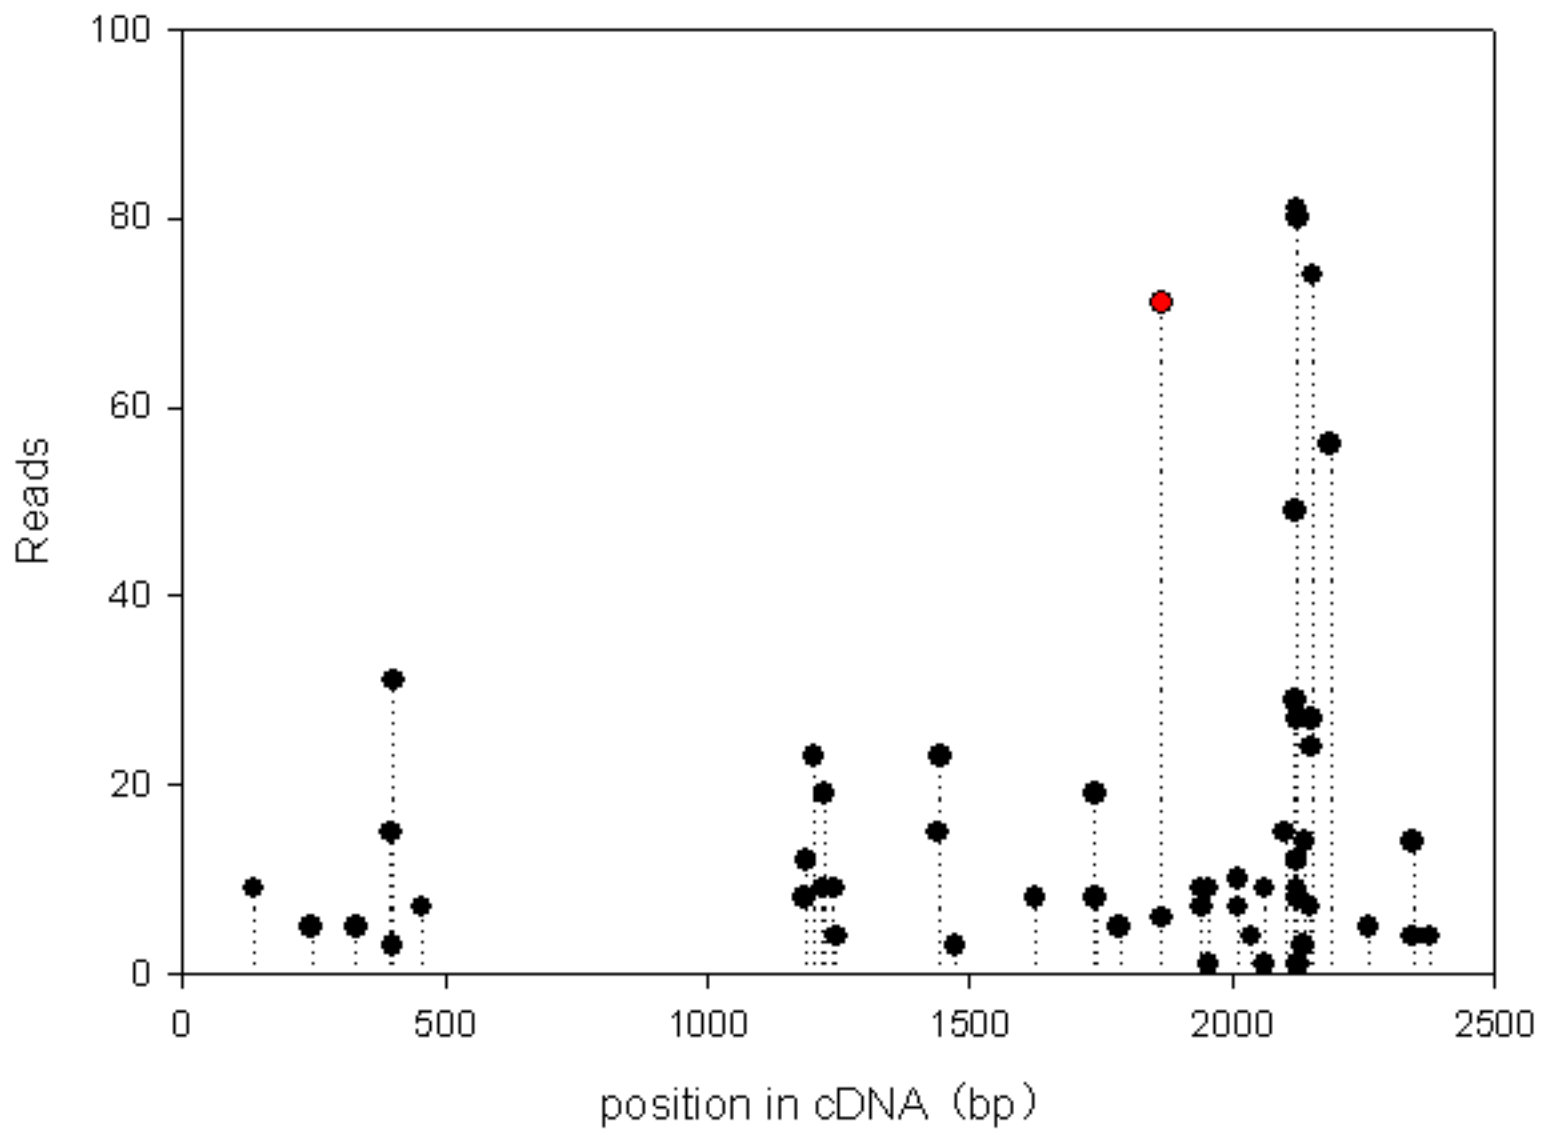

```

5' AGUGCAGCAUCAUCAGGAUCCCAUU 3'          Cs8g17390.1
   . . . . .
3' -UACGUCGUAGUAGUUCUAAG----- 5'      Csi-miR172e.2
  
```

Csi-miR172e.2, target=Orange1.1t04055.1 gene=Orange1.1t04055  
 Category=2  
 Score=2  
 Cleavage Site=2049

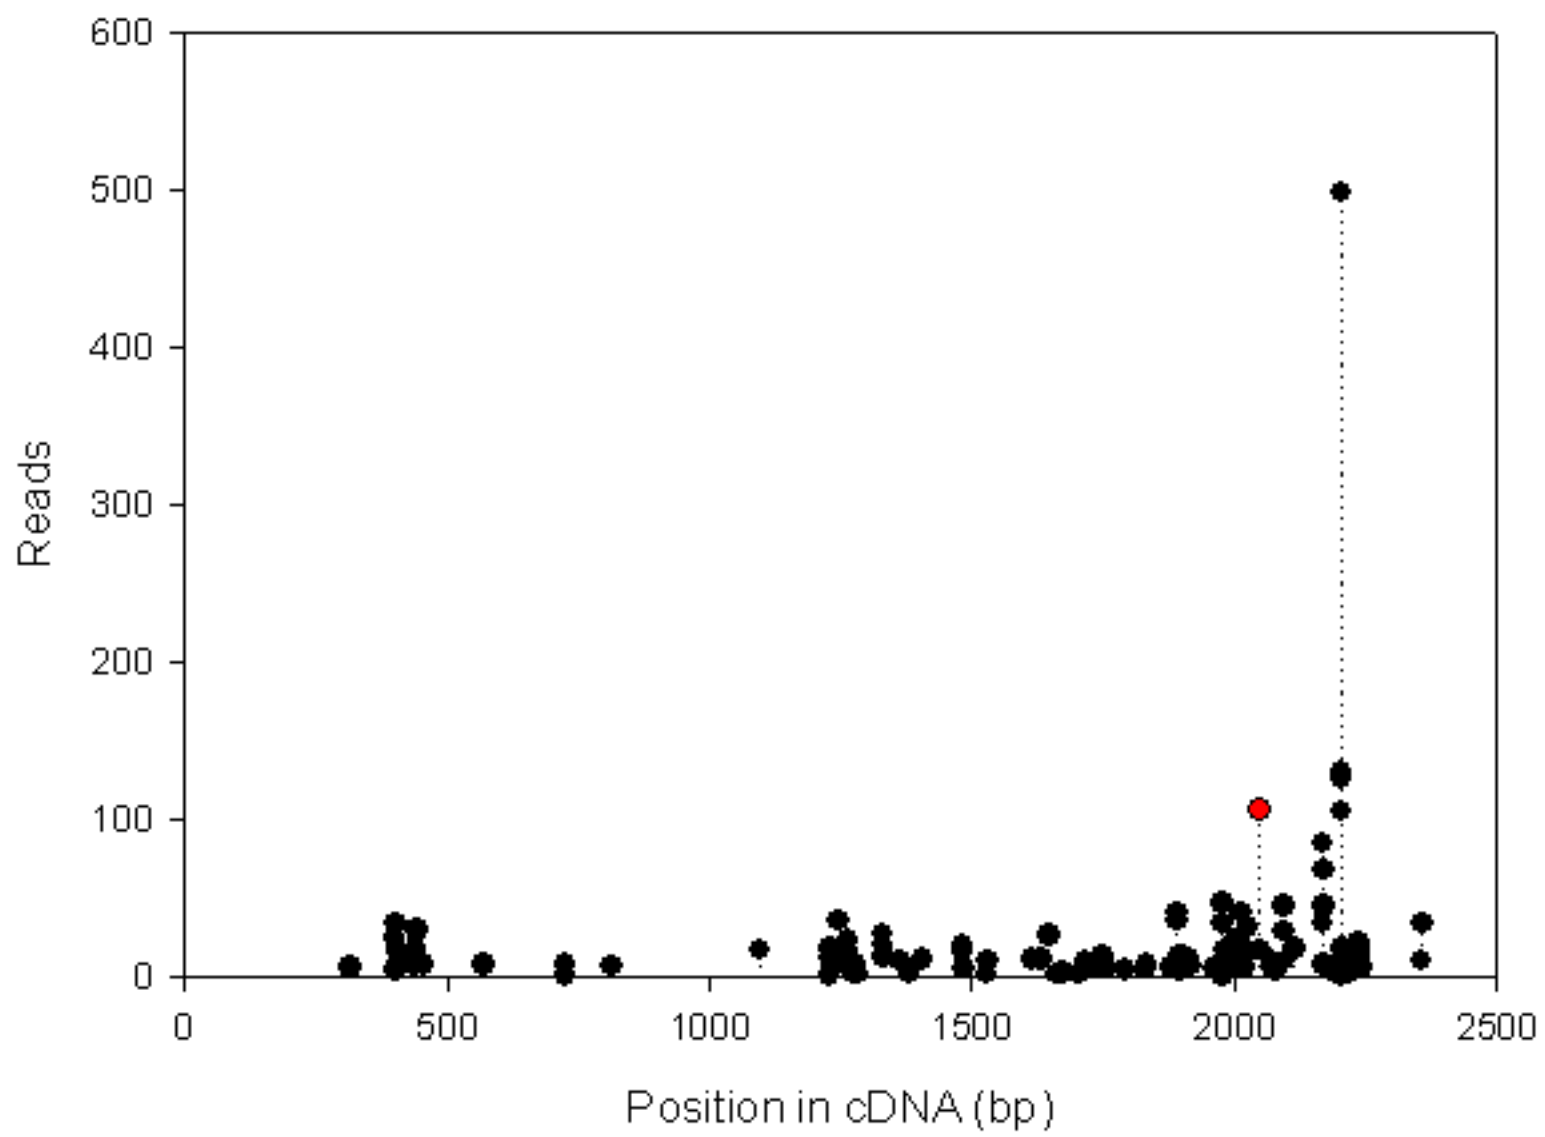

5' GCUGCAGCAUCAUCAGGAUCCCUCA 3'  
 :::::::::::::::::::::  
 3' -UACGUCGUAGUAGUUCUAAG----- 5'

Orange1.1t04055.1  
 Csi-miR172e.2

Csi-miR172k, target=Cs8g17390.1 gene=Cs8g17390  
 Category:3  
 Score=2.5  
 Cleavage Site=1865

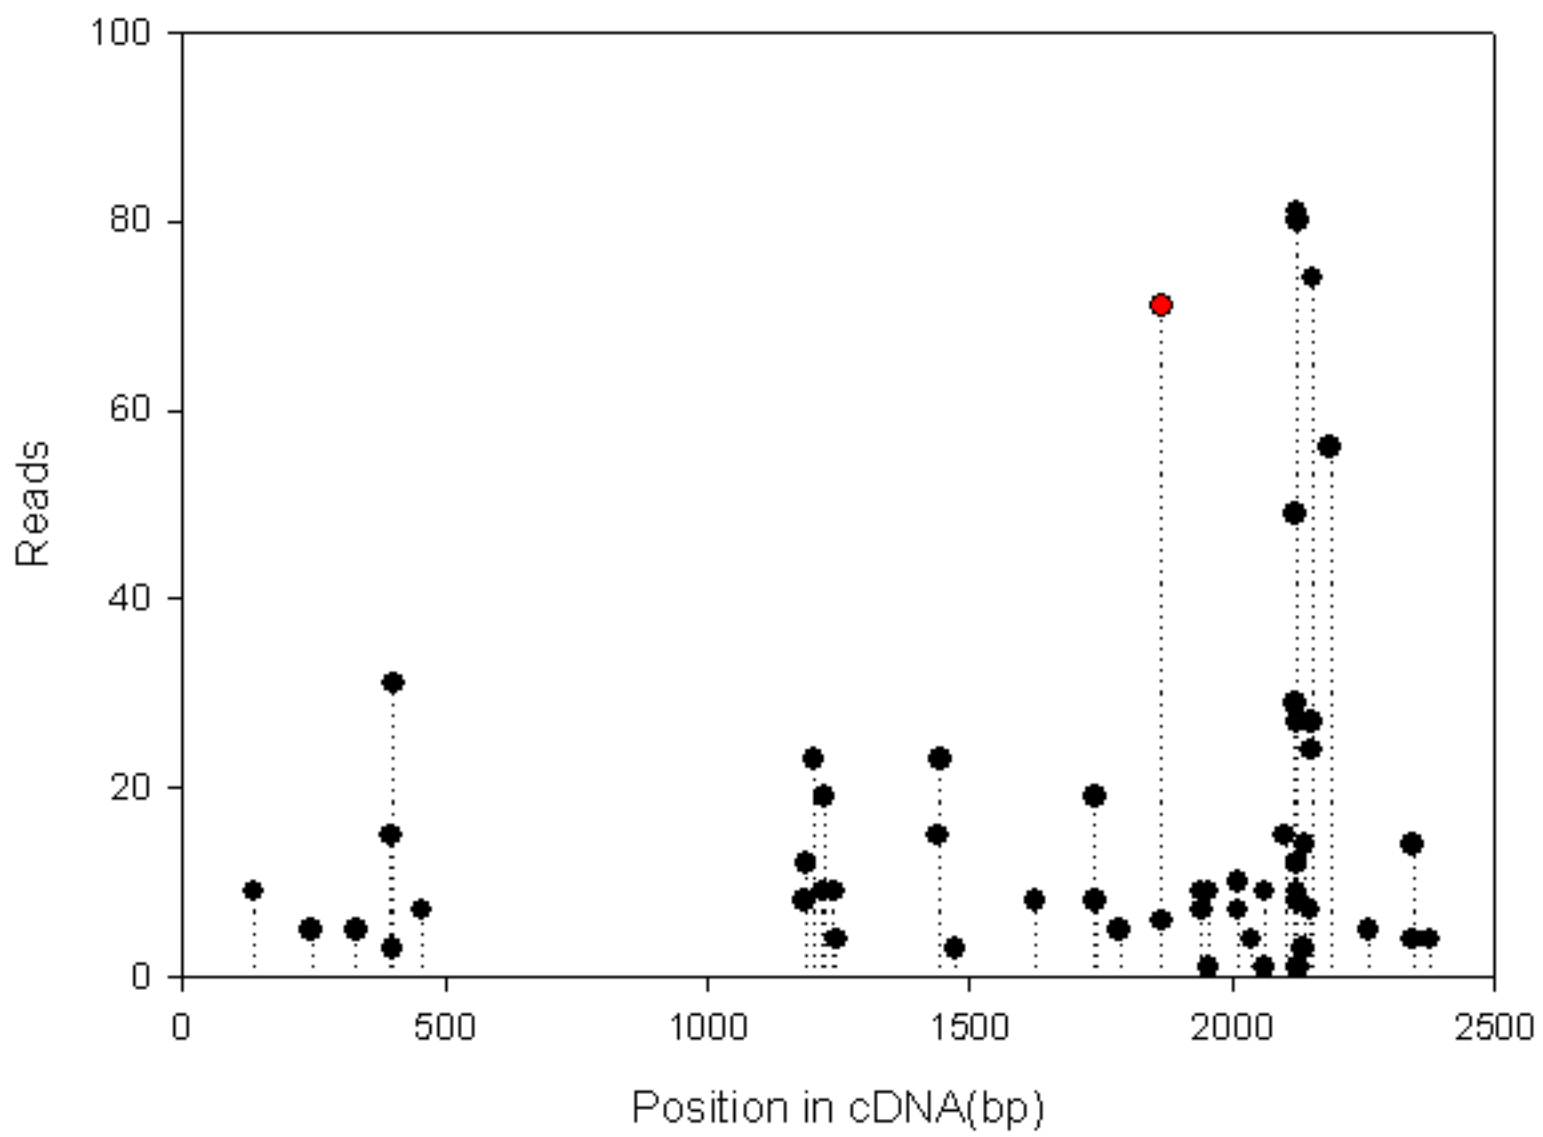

|    |                                   |    |             |
|----|-----------------------------------|----|-------------|
| 5' | AGUGCAGCAUCAUCAGGAUCCCAUU         | 3' | Cs8g17390.1 |
|    | . : : : : : : : : : : : : : : : : |    |             |
| 3' | -UACGUCGUAGUAGUUCUAAGU-----       | 5' | Csi-miR172k |

Csi-miR172k, target=Orange1.1t04055.1 gene=Orange1.1t04055  
 Category=3  
 Score=3  
 Cleavage Site=2049



5' GCUGCAGCAUCAUCAGGAUCCCUCA 3'  
 :::::::::::::::::::::  
 3' -UACGUCGUAGUAGUUCUAAGU---- 5'

Orange1.1t04055.1

Csi-miR172k



Csi-miR2111, target=Cs5g29630.1 gene=Cs5g29630  
 Category=3  
 Score=5  
 Cleavage Site=1384

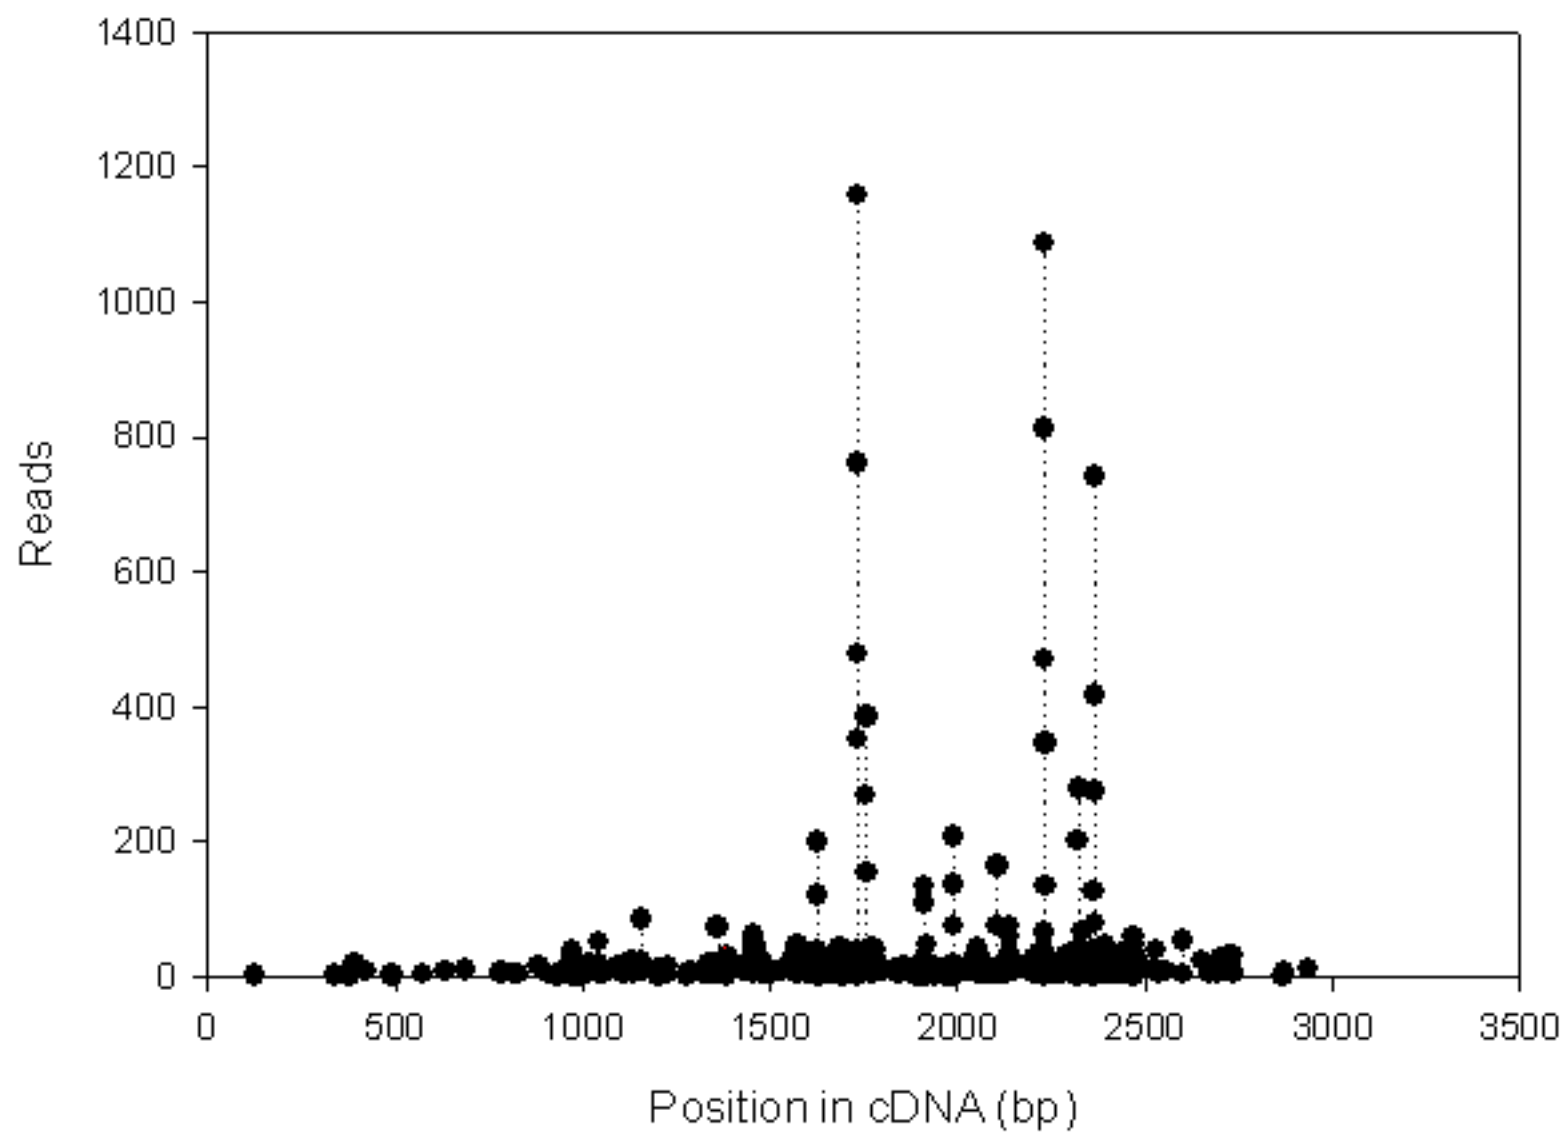

```

5' UUUGACCCCAGGAUGCAGUUUAUUU 3'          Cs5g29630.1
   ..:  ::  :::::~::~:  :::
3' --GUUUGGAGUCCUACGUCUAAU--- 5'        Csi-miR2111

```

Csi-miR2118.1,target=Cs6g12050.1 gene=Cs6g12050  
 Category=3  
 Score=5  
 Cleavage Site=655

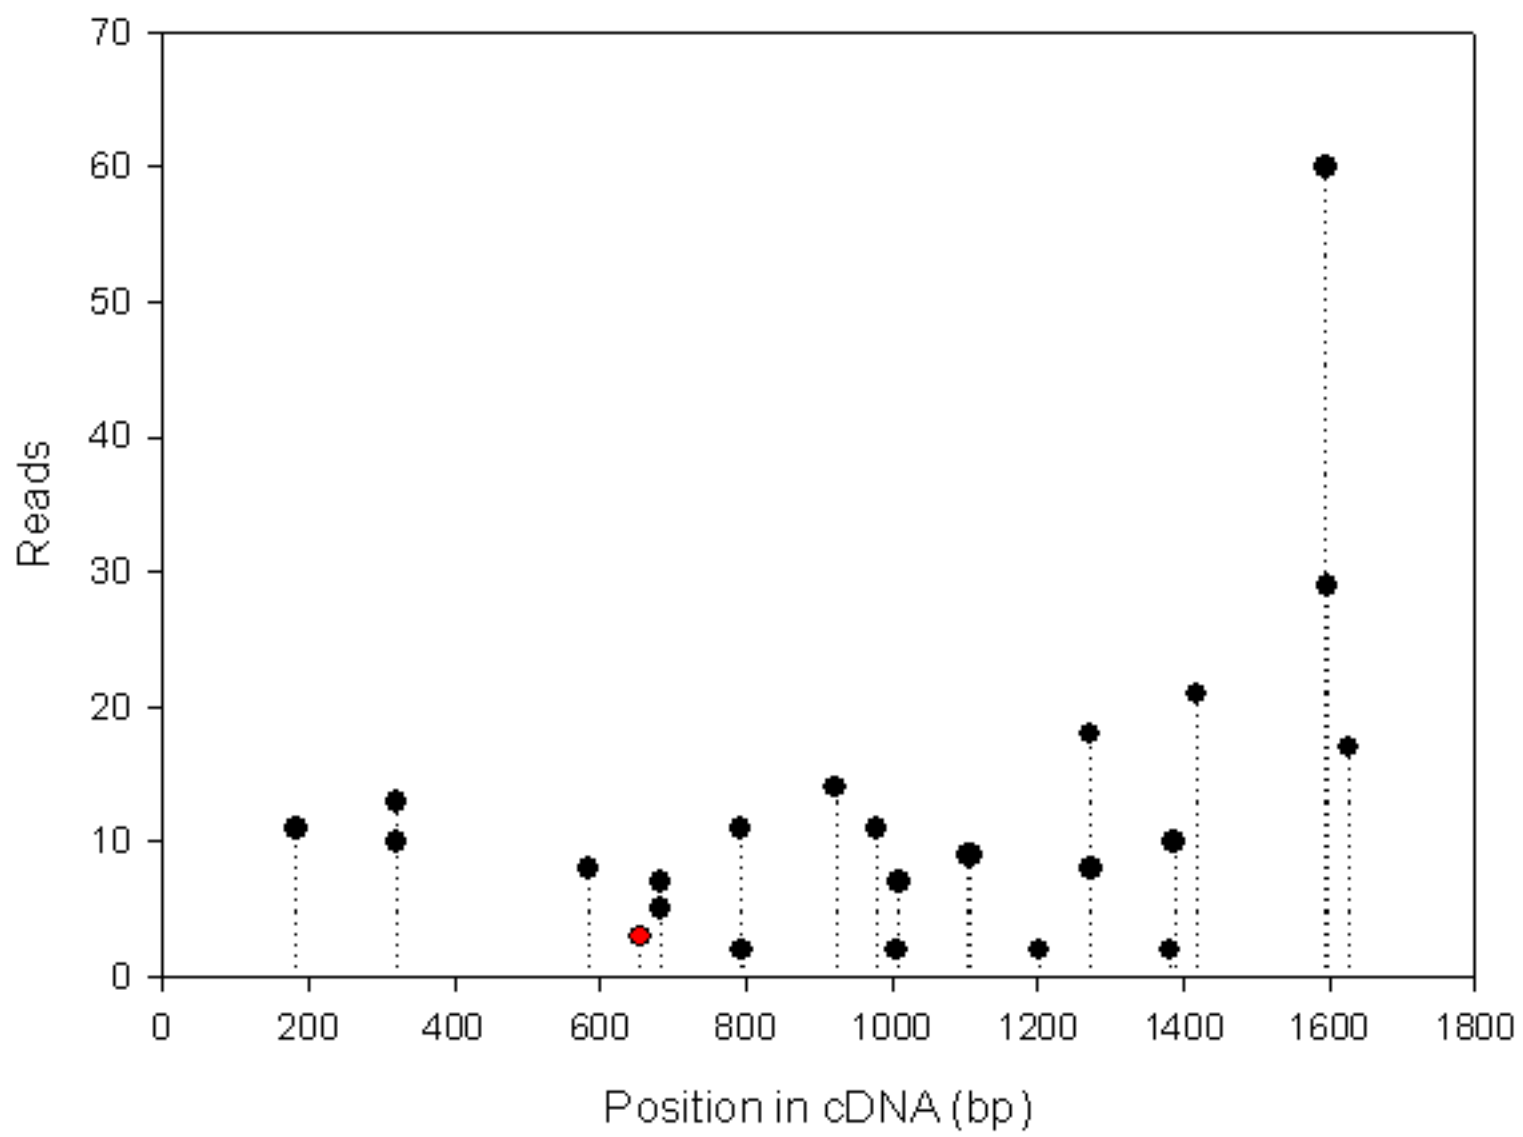

```

5' AAGGAAUGGGUGACAGAGGUGAAUUU 3'      Cs6g12050.1
   :::::::::::  ::  :::::
3' UCCCUUACCCACCGUAUCCAUU----- 5'    Csi-miR2118.1
  
```

Csi-miR2118.2, target=Cs3g12720.1 gene=Cs3g12720  
 Category=1  
 Score=5  
 Cleavage Site=547

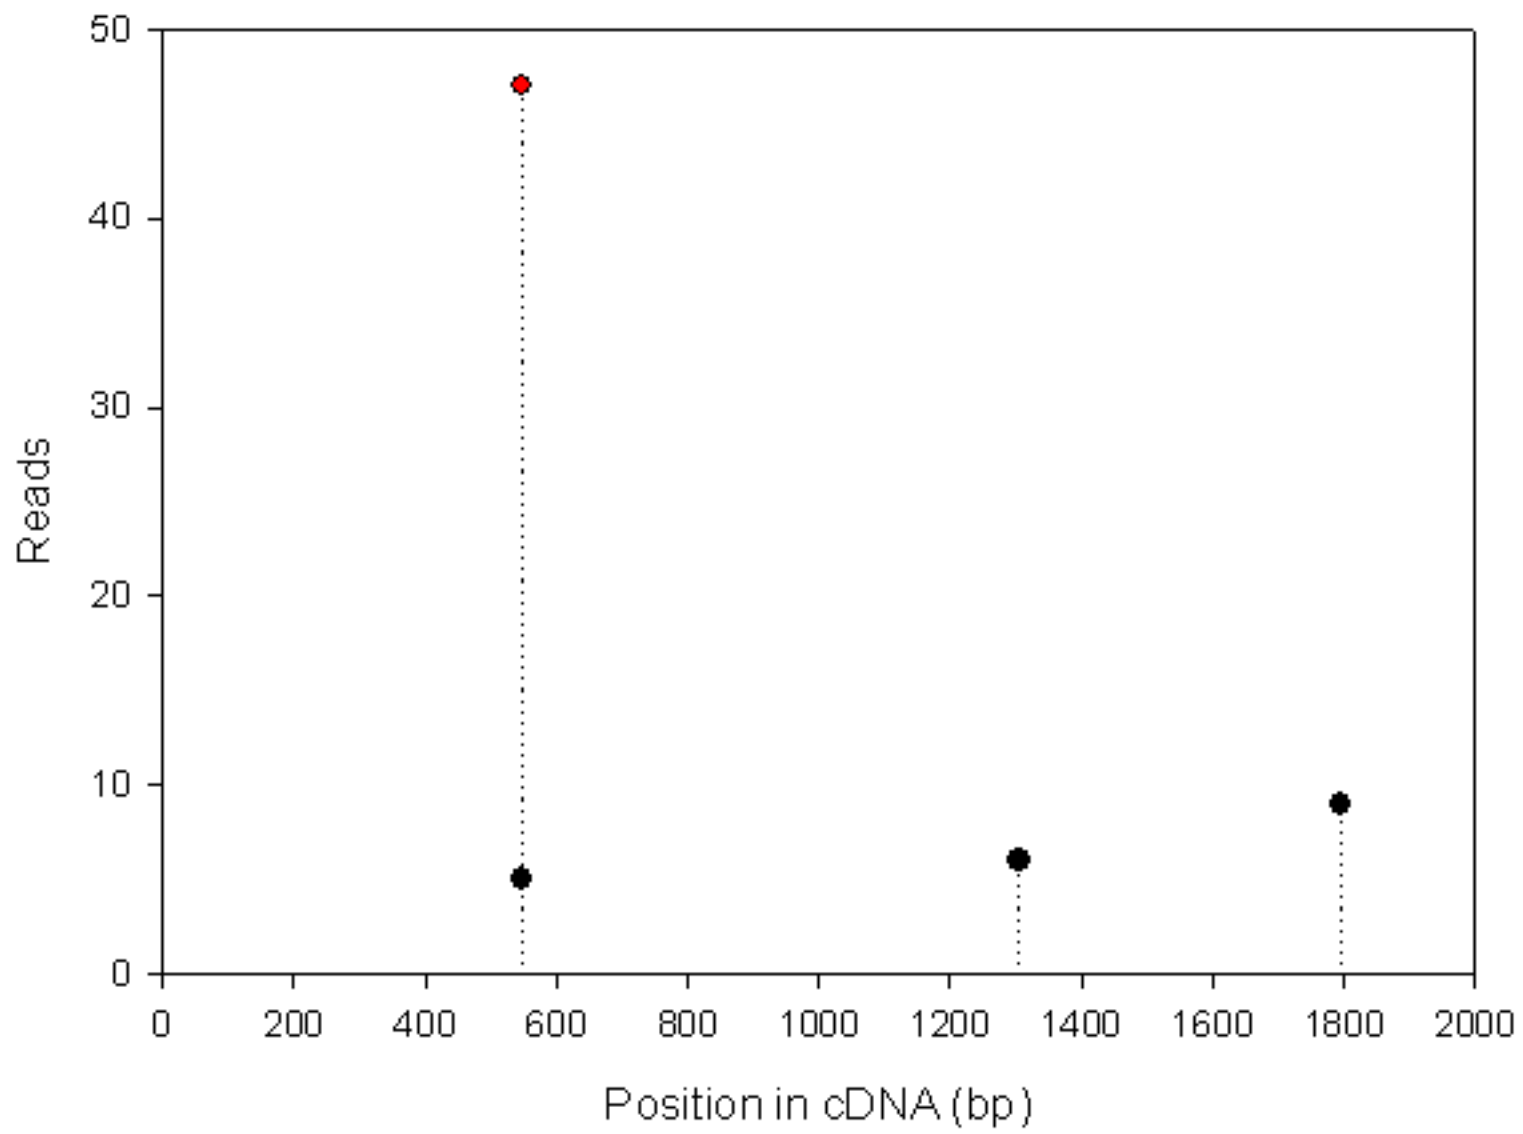

```

5' GGCAUGGGUGGGCAUUGGAAAGACAAC 3'      Cs3g12720.1
  :: :::::::::::::: :: ::
3' CCUACCCACCGUAUCCAU----- 5'      Csi-miR2118.2
  
```

Csi-miR2118.2, target=Cs3g12850.1 gene=Cs3g12850  
 Category=1  
 Score=4.5  
 Cleavage Site=547

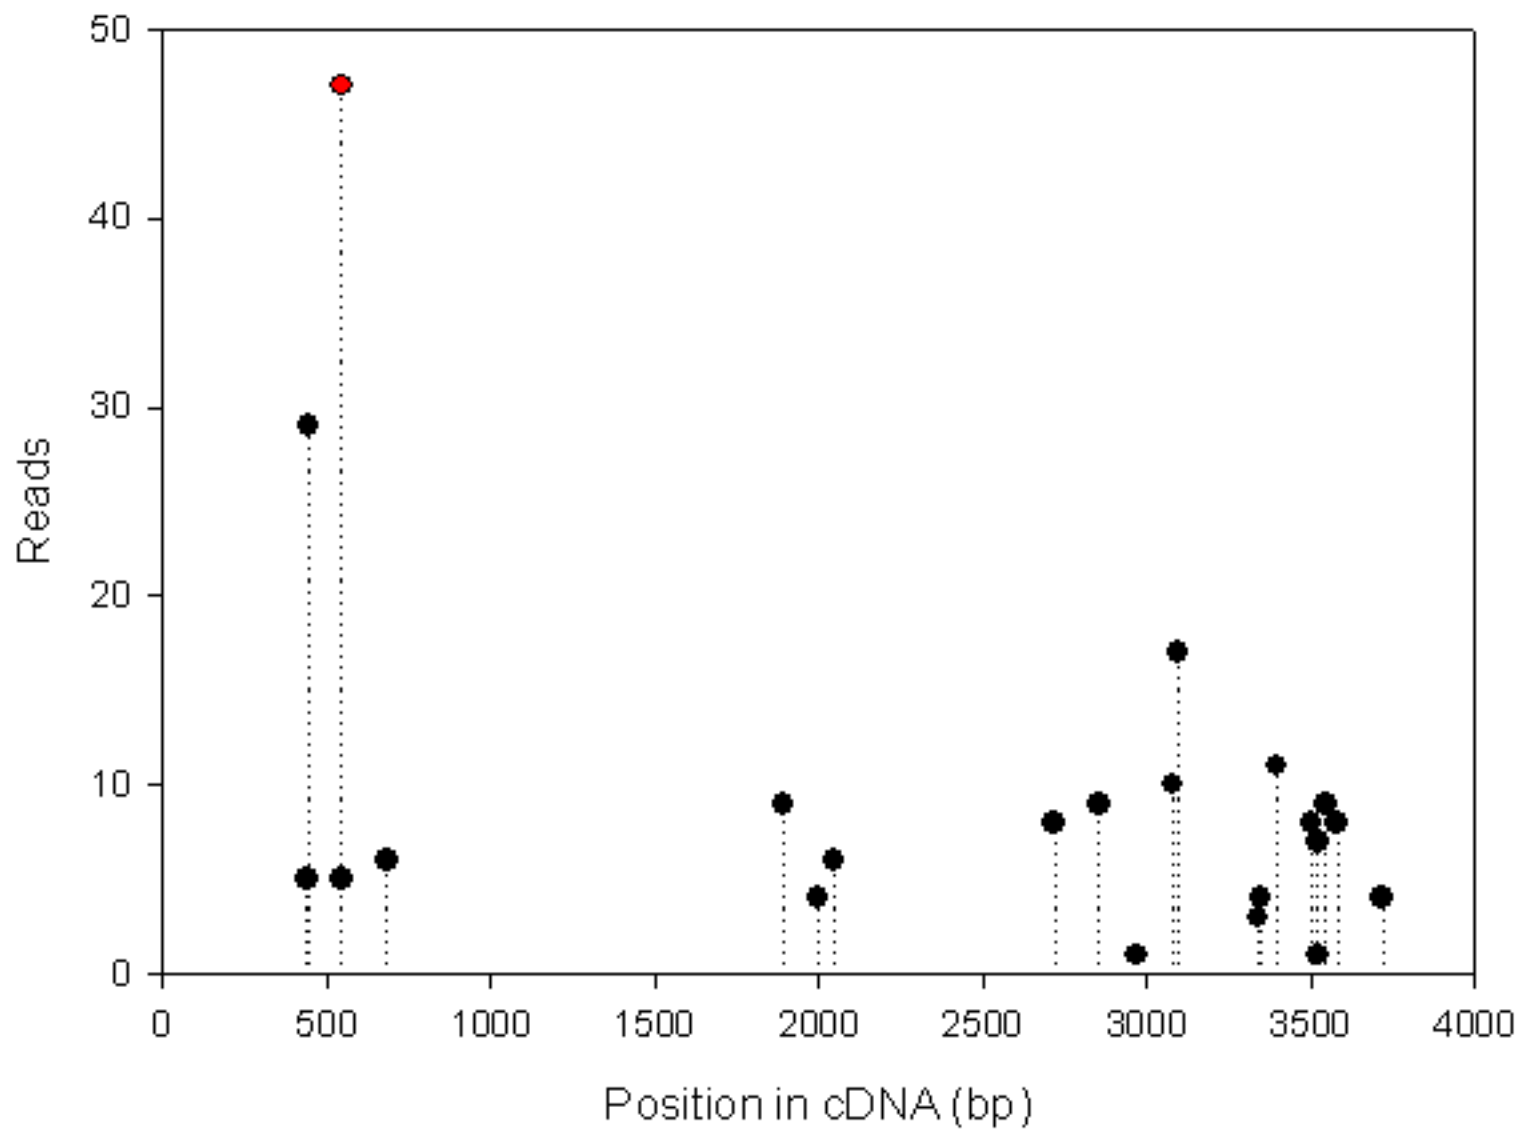

```

5' GGAUGGGUGGCAUUGGAAAGACAAC 3'      Cs3g12850.1
   ::::::::::::::: :: ::
3' CCUUAACCACCGUAUCCAUU----- 5'      Csi-miR2118.2

```

Csi-miR2118.2, target=Orange1.1t00149.1 gene=Orange1.1t00149  
 Category:2  
 Score=3.5  
 Cleavage Site=100

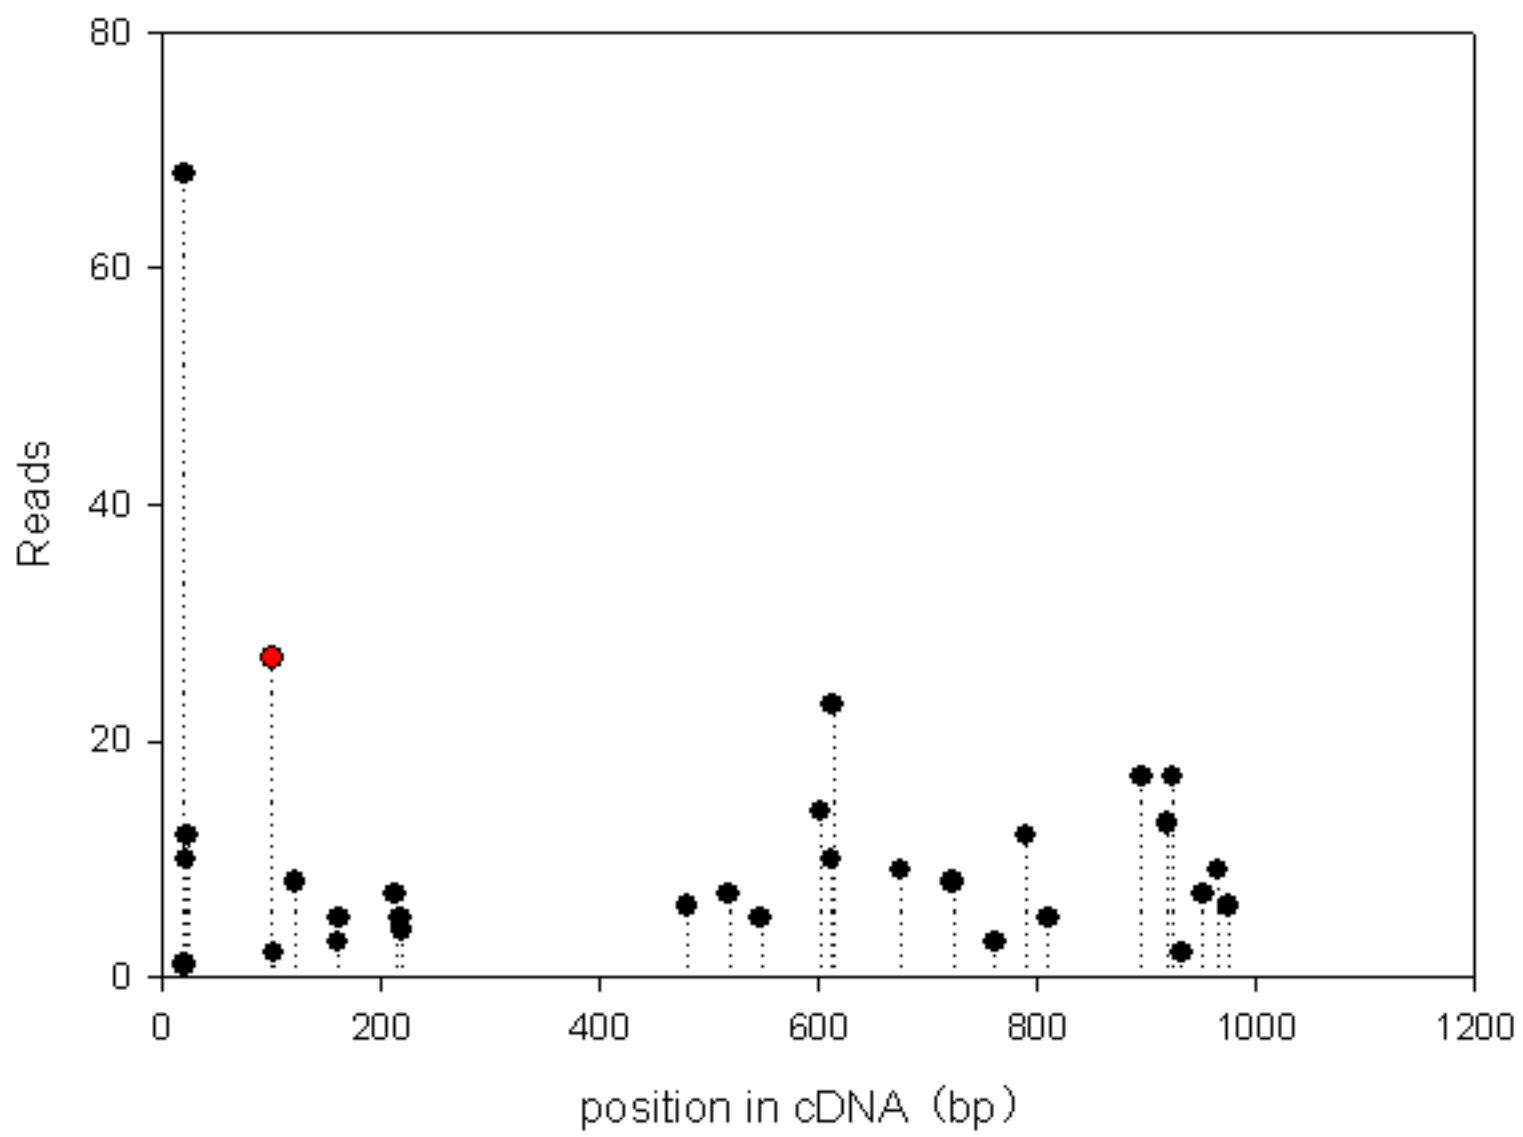

```

5' GGAGUGGGUGGCAUA-GUGAUGGCCGG 3'      Orange1.1t00149.1
   :::::::::::::::
3' CCUACCCACCGUAUCCAUU----- 5'      Csi-miR2118.2
  
```

Csi-miR2118.2target=Cs3g12760.1 gene=Cs3g12760  
 Category=1  
 Score=4.5  
 Cleavage Site=1037

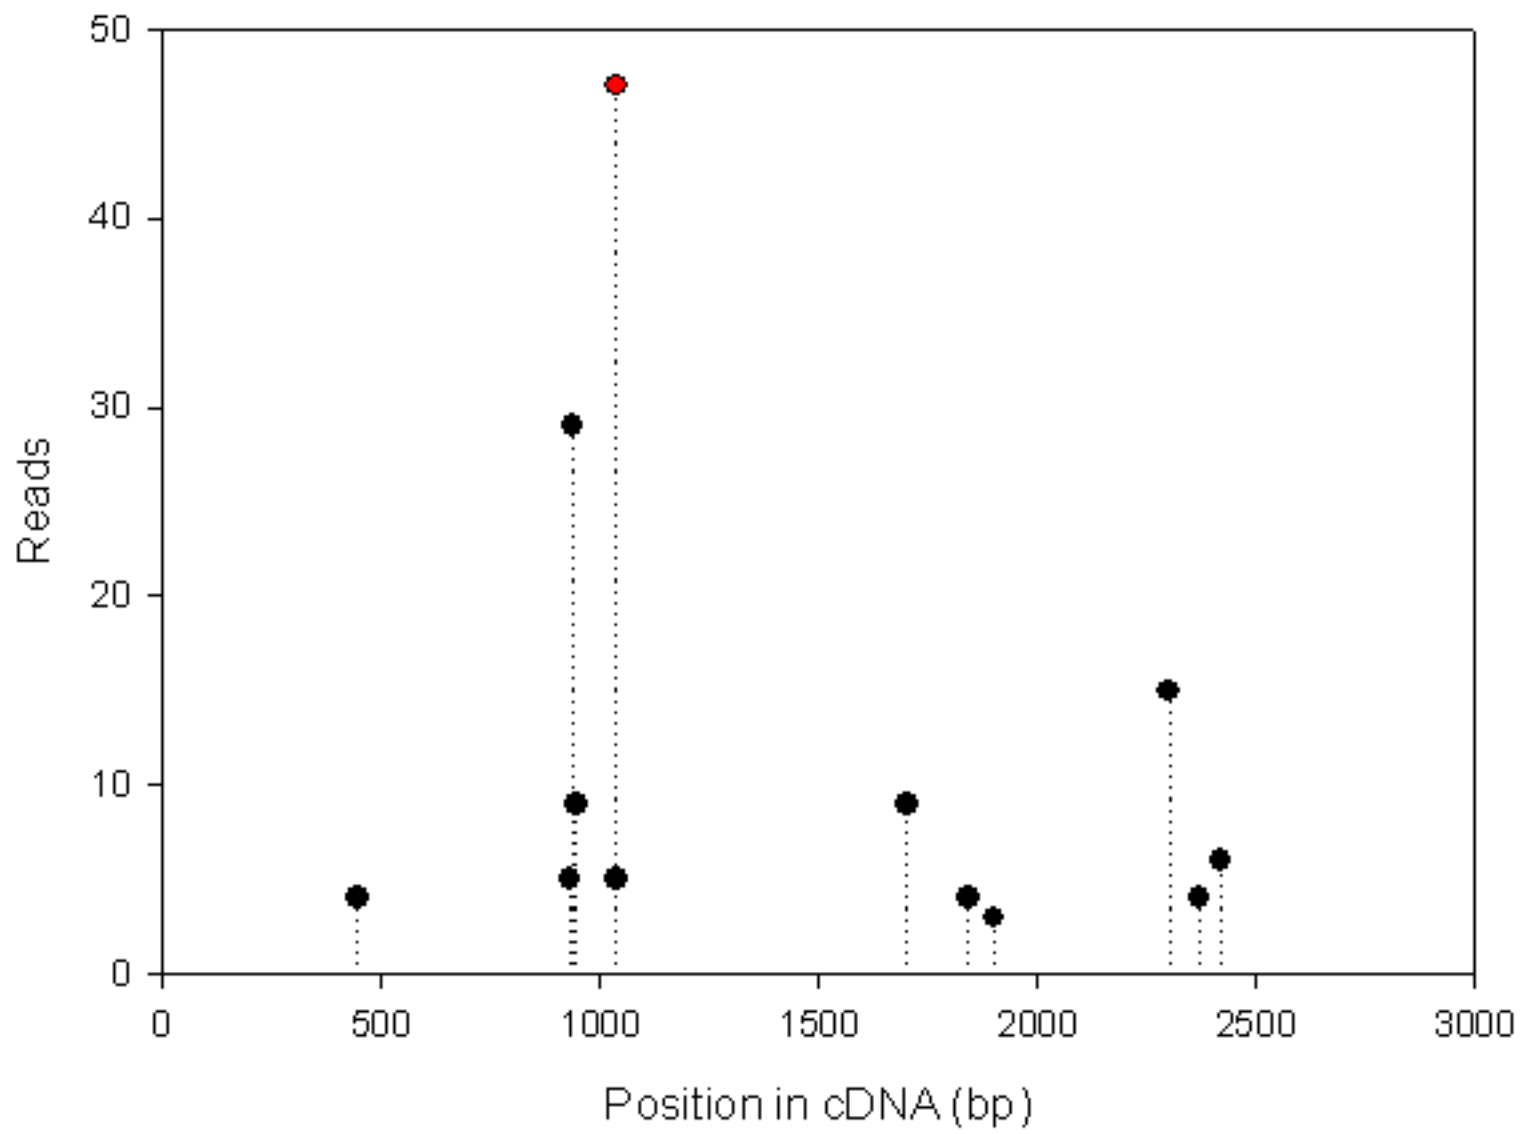

5' GGGAUGGGUGGCAUUGGAAAGACAAC 3'  
 .....  
 3' CCUUACCCACCGUAUCCAUU----- 5'

Cs3g12760.1

Csi-miR2118.2

Csi-miR2275a, target=Orange1.1t02313.1 gene=Orange1.1t02313  
 Category=3  
 Score=4.5  
 Cleavage Site=2627

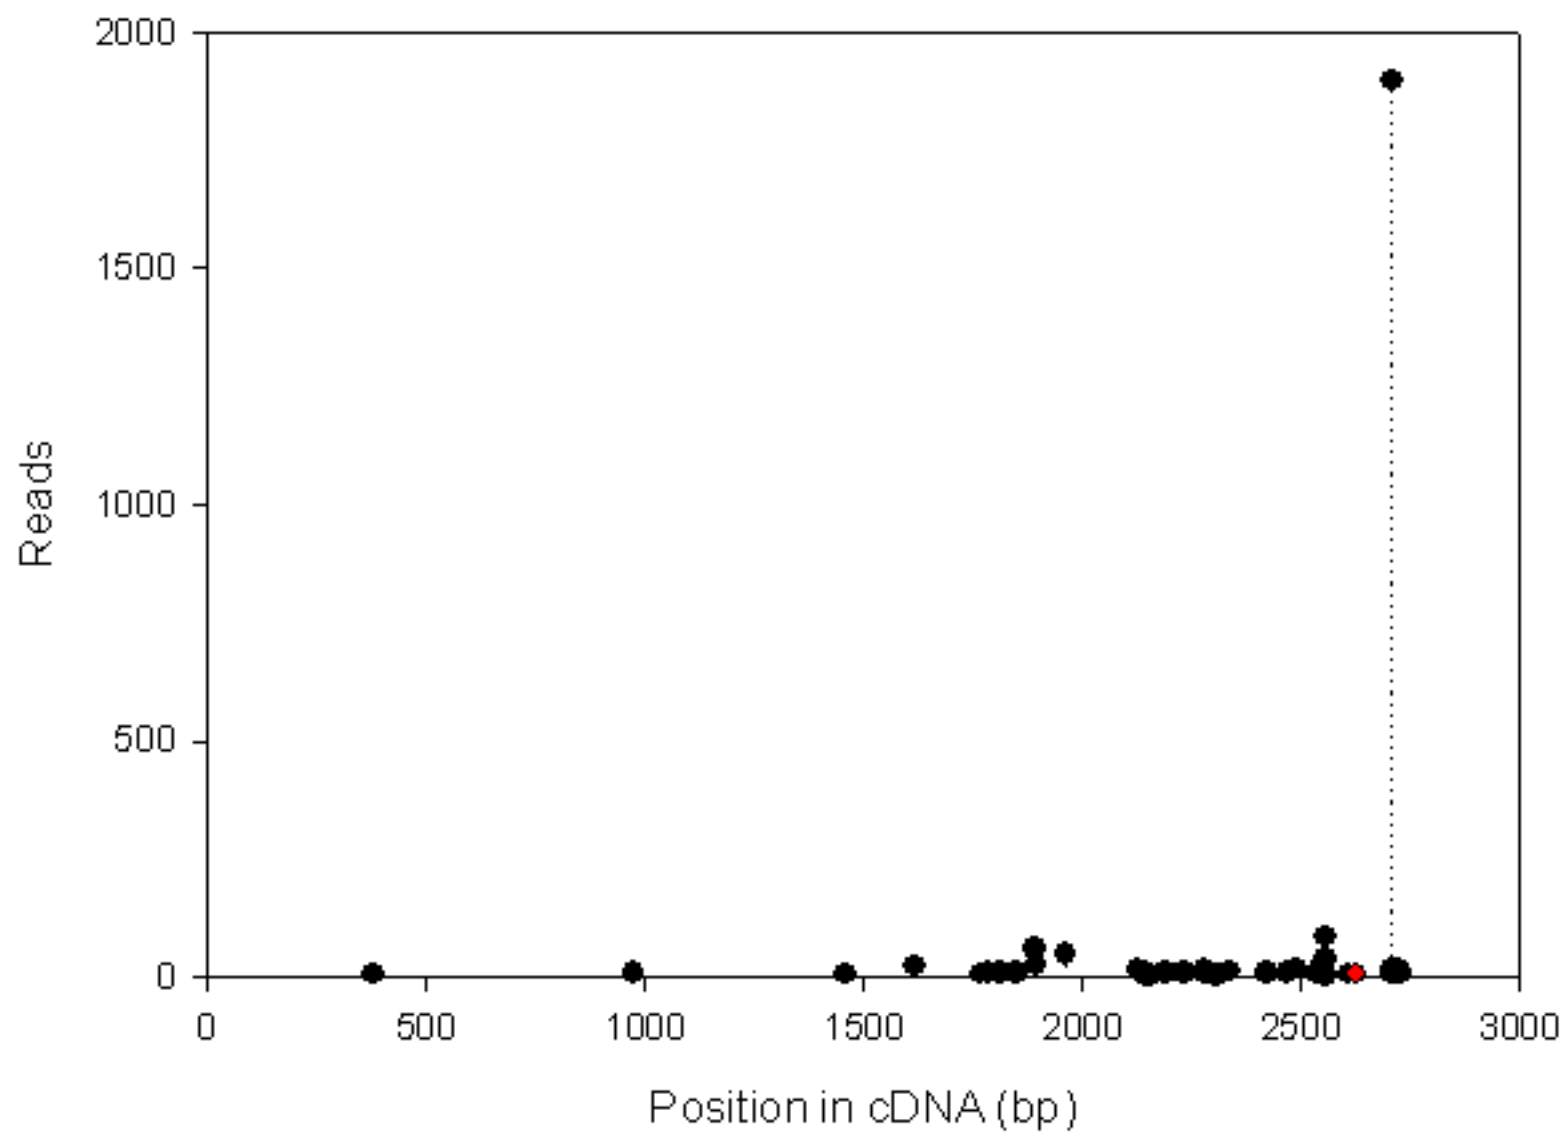

5' CCUGAGA-AUUGGAGGGAAUAAAAGUU 3'  
 :.:.:.: :.:.:.:.:.:.:.:.:.: :.:.:  
 3' --AUUCUAUAACCUCCUUUAAUUU--- 5'

Orange1.1t02313.1  
 Csi-miR2275a

Csi-miR2275b, target=Cs2g10790.1 gene=Cs2g10790  
 Category=3  
 Score=4.5  
 Cleavage Site=1371

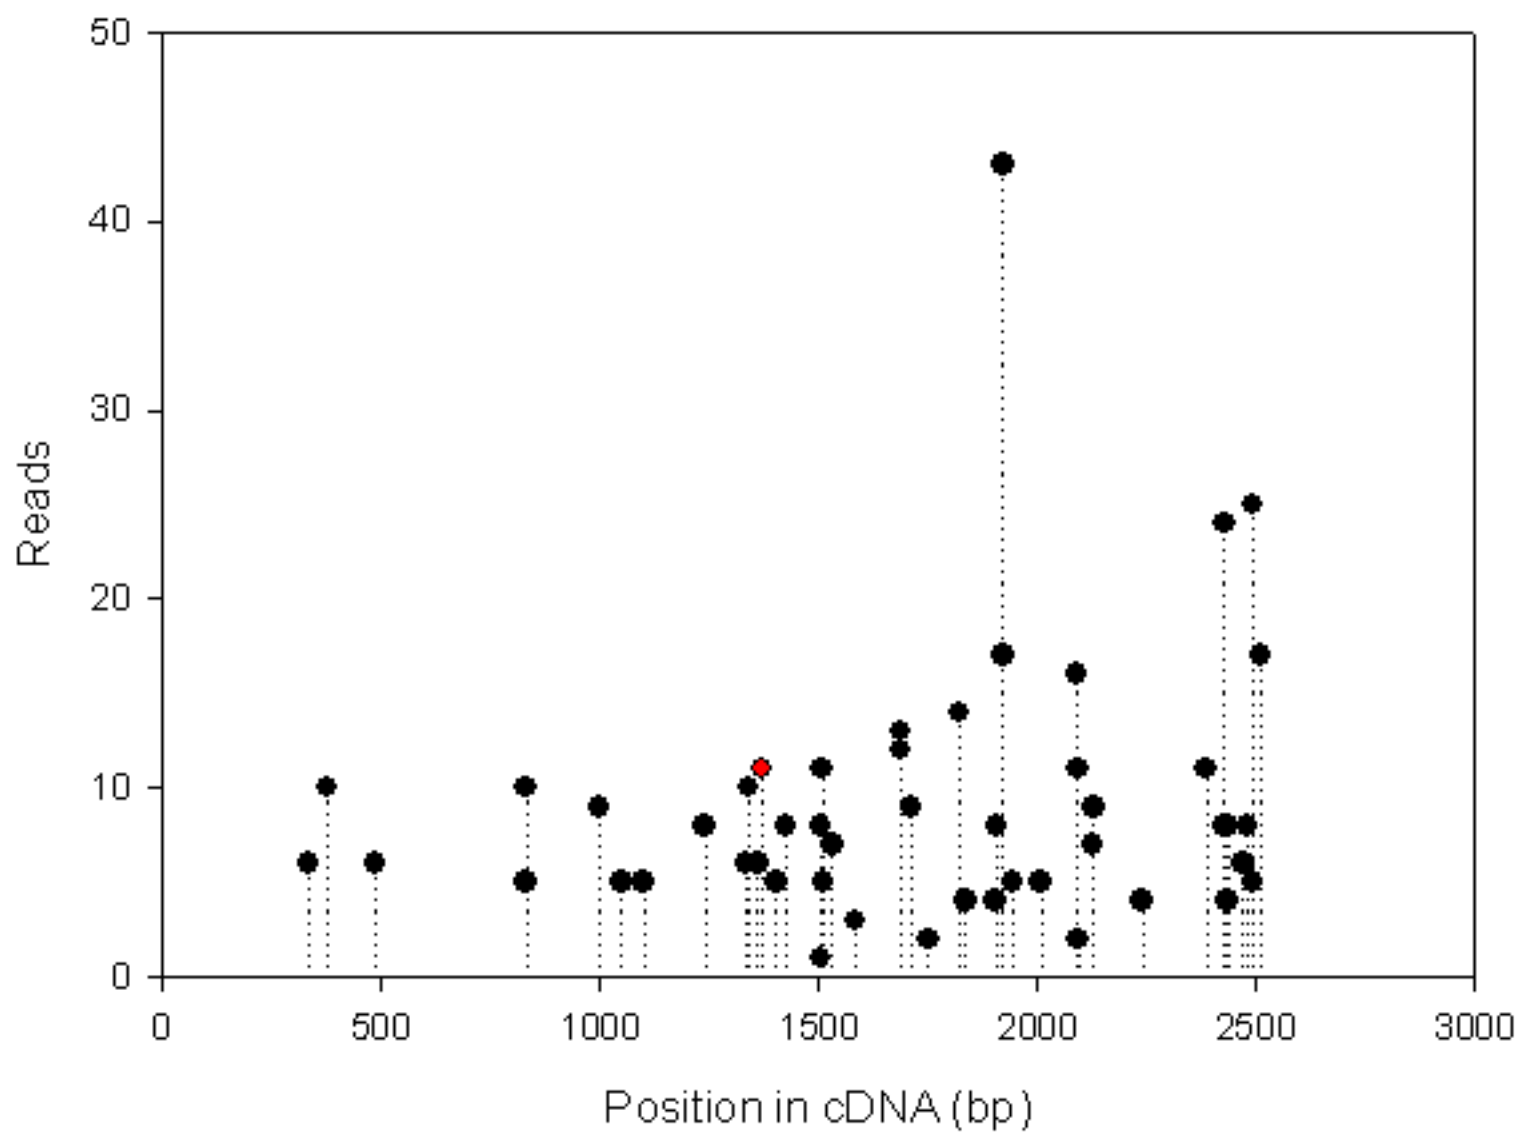

```

5' UGAAGUUGCGGAGGAAAUUAGAAUGC 3'      Cs2g10790.1
   : : : : : : : : : : : : : : : :
3' ACUUUAUAACCUCCUUUAAUUU----- 5'    Csi-miR2275b

```



Csi-miR2275c.1, target=Cs2g10790.1 gene=Cs2g10790  
 Category=3  
 Score=5  
 Cleavage Site=1371

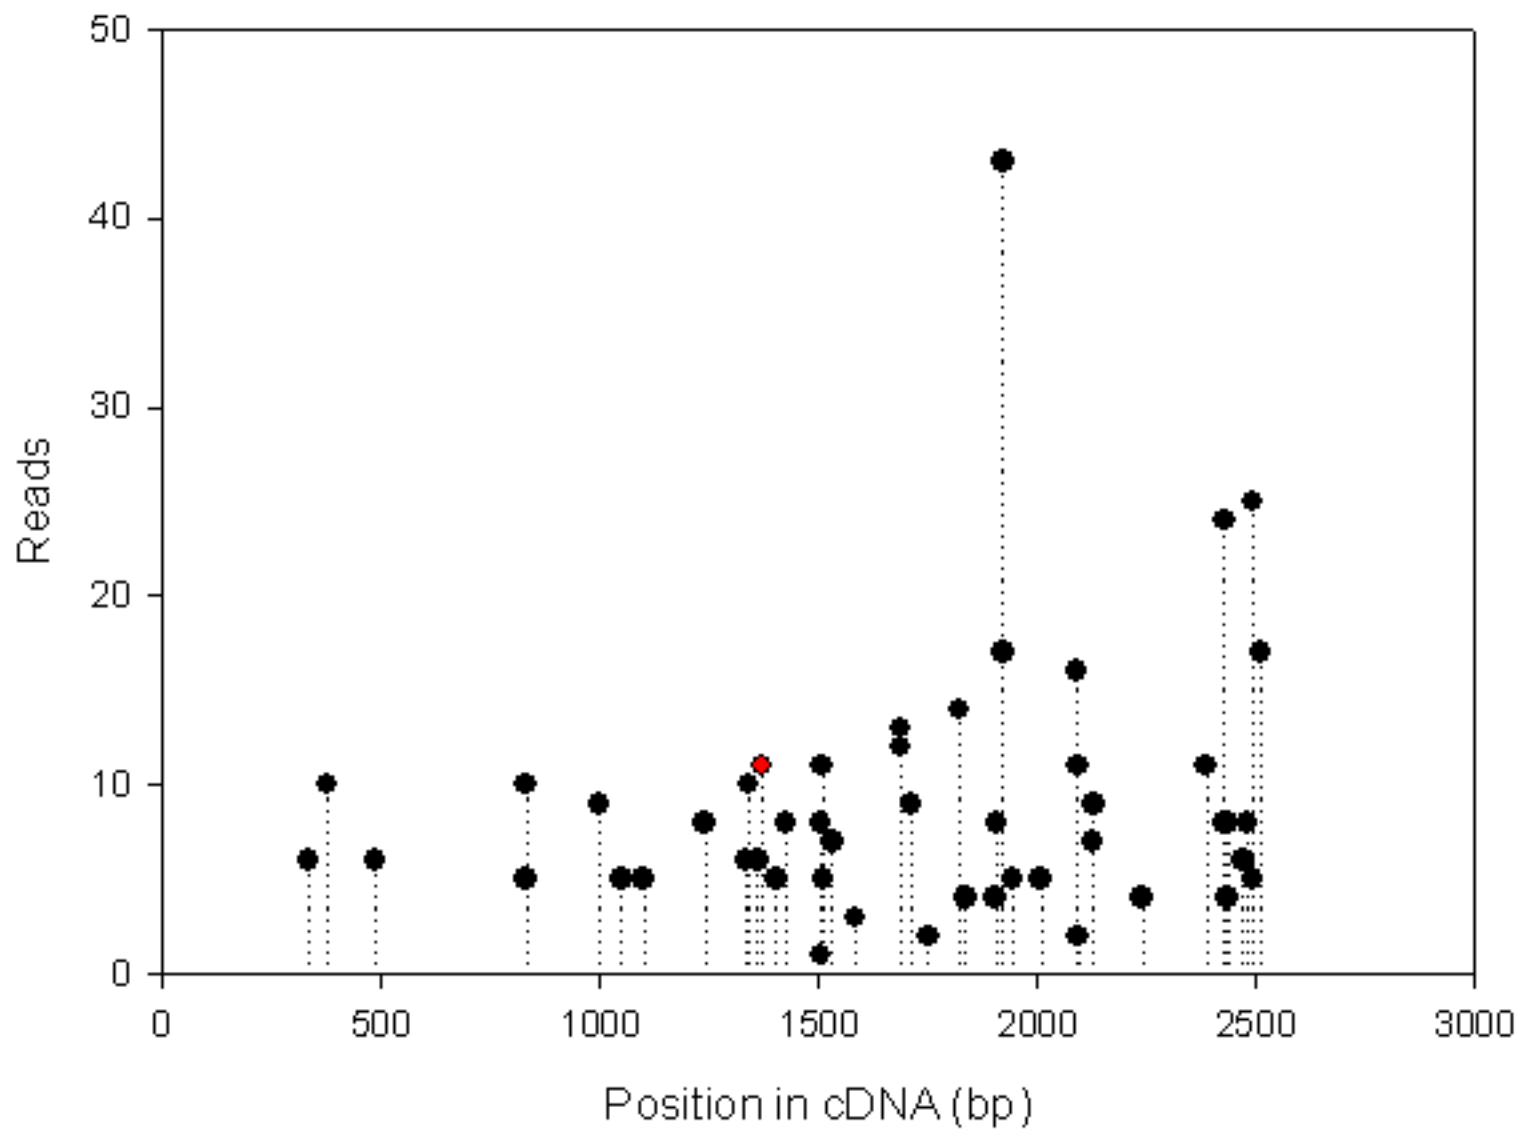

```

5' UGAAGUUGCGGAGGAAAUAGAAUGC 3'      Cs2g10790.1
   :.:.:.:  :.:.:.:.:.:.:.:.:.:.:
3' AUUUUAUAACCUCCUUAAUUU----- 5'    Csi-miR2275c.1
  
```

Csi-miR2275d, target=Cs2g06980.1 gene=Cs2g06980  
 Category: 3  
 Score=5  
 Cleavage Site=3782

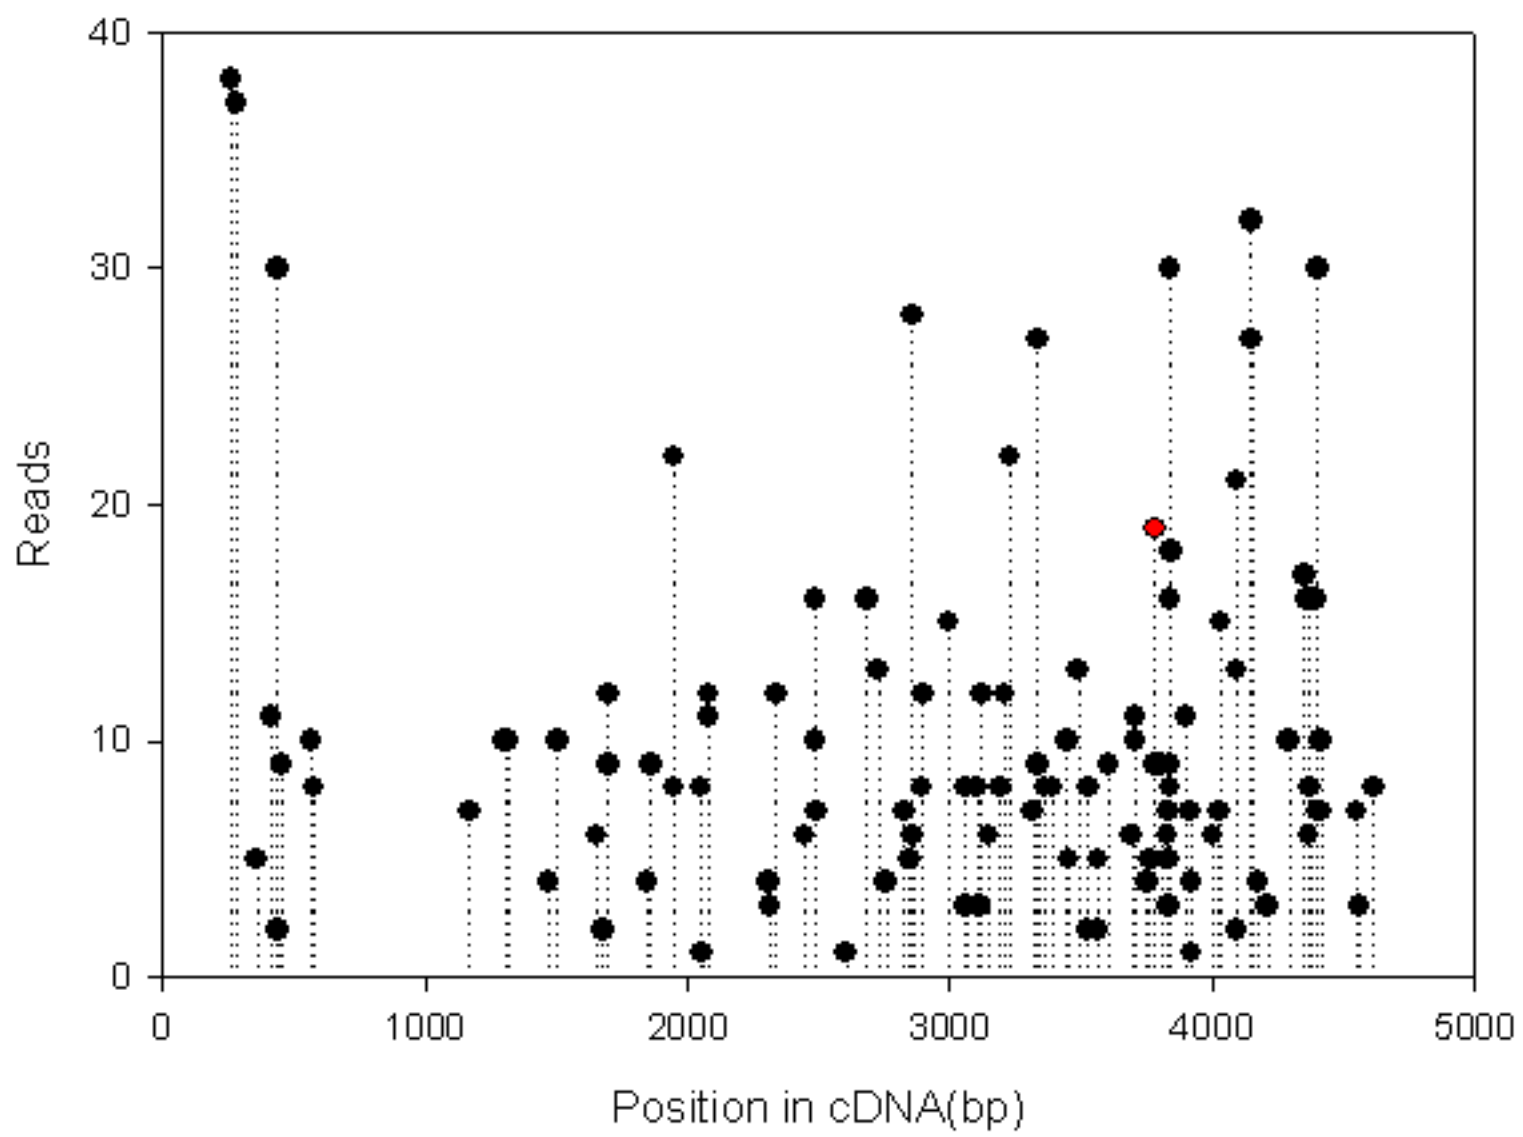

```

5' AGAUCAUGUAGUU-CAUCCAAUUCUUG 3'      Cs2g06980.1
   : : : : : : : : : : : : : : : :
3' ----ACAAAUCAAGGUAGGUUAAGA-- 5'      Csi-miR2275d
  
```

Csi-miR2275d, target=Cs8g02270.2 gene=Cs8g02270  
 Category=3  
 Score=4  
 Cleavage Site=456

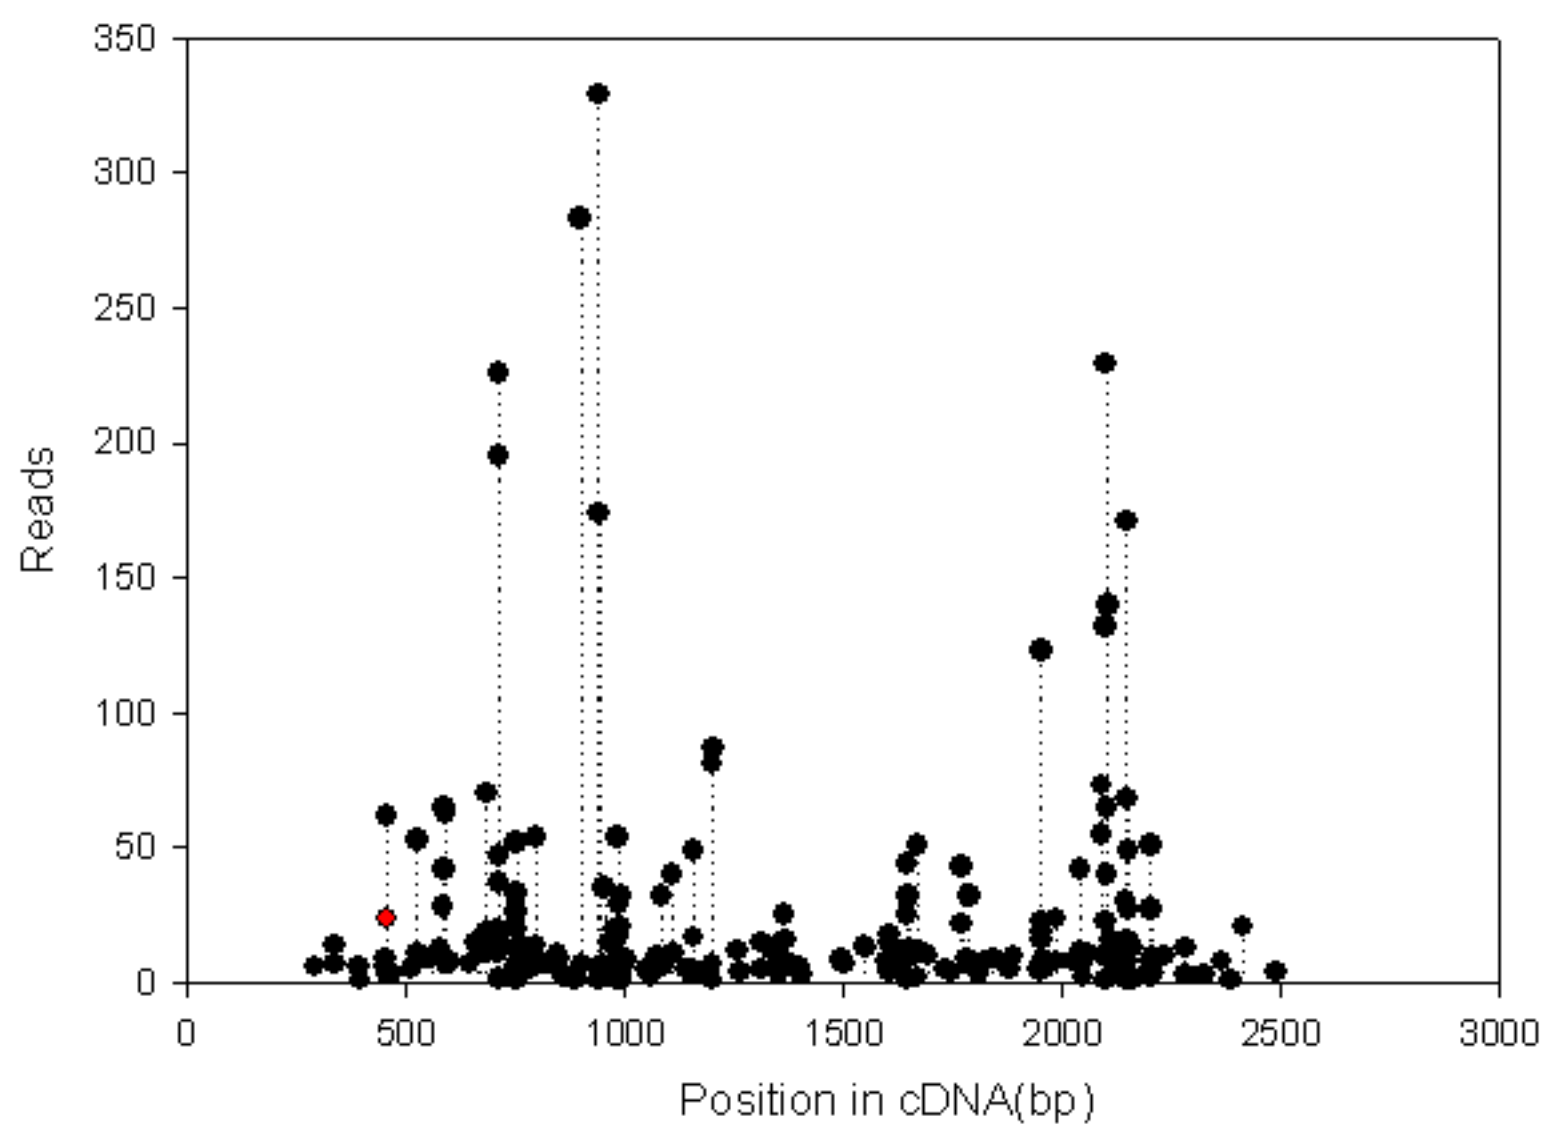

```

5' AGUUUUCAUUUGUUUCAUCCAAUUCU 3'      Cs8g02270.2
   :  :  :  :  :  :  :  :  :  :  :
3' -----ACAAAUCAAGGUAGGUUAAGA 5'      Csi-miR2275d

```

Csi-miR2275f, target=Cs4g12820.1 gene=Cs4g12820  
 Category=3  
 Score=5  
 Cleavage Site=522

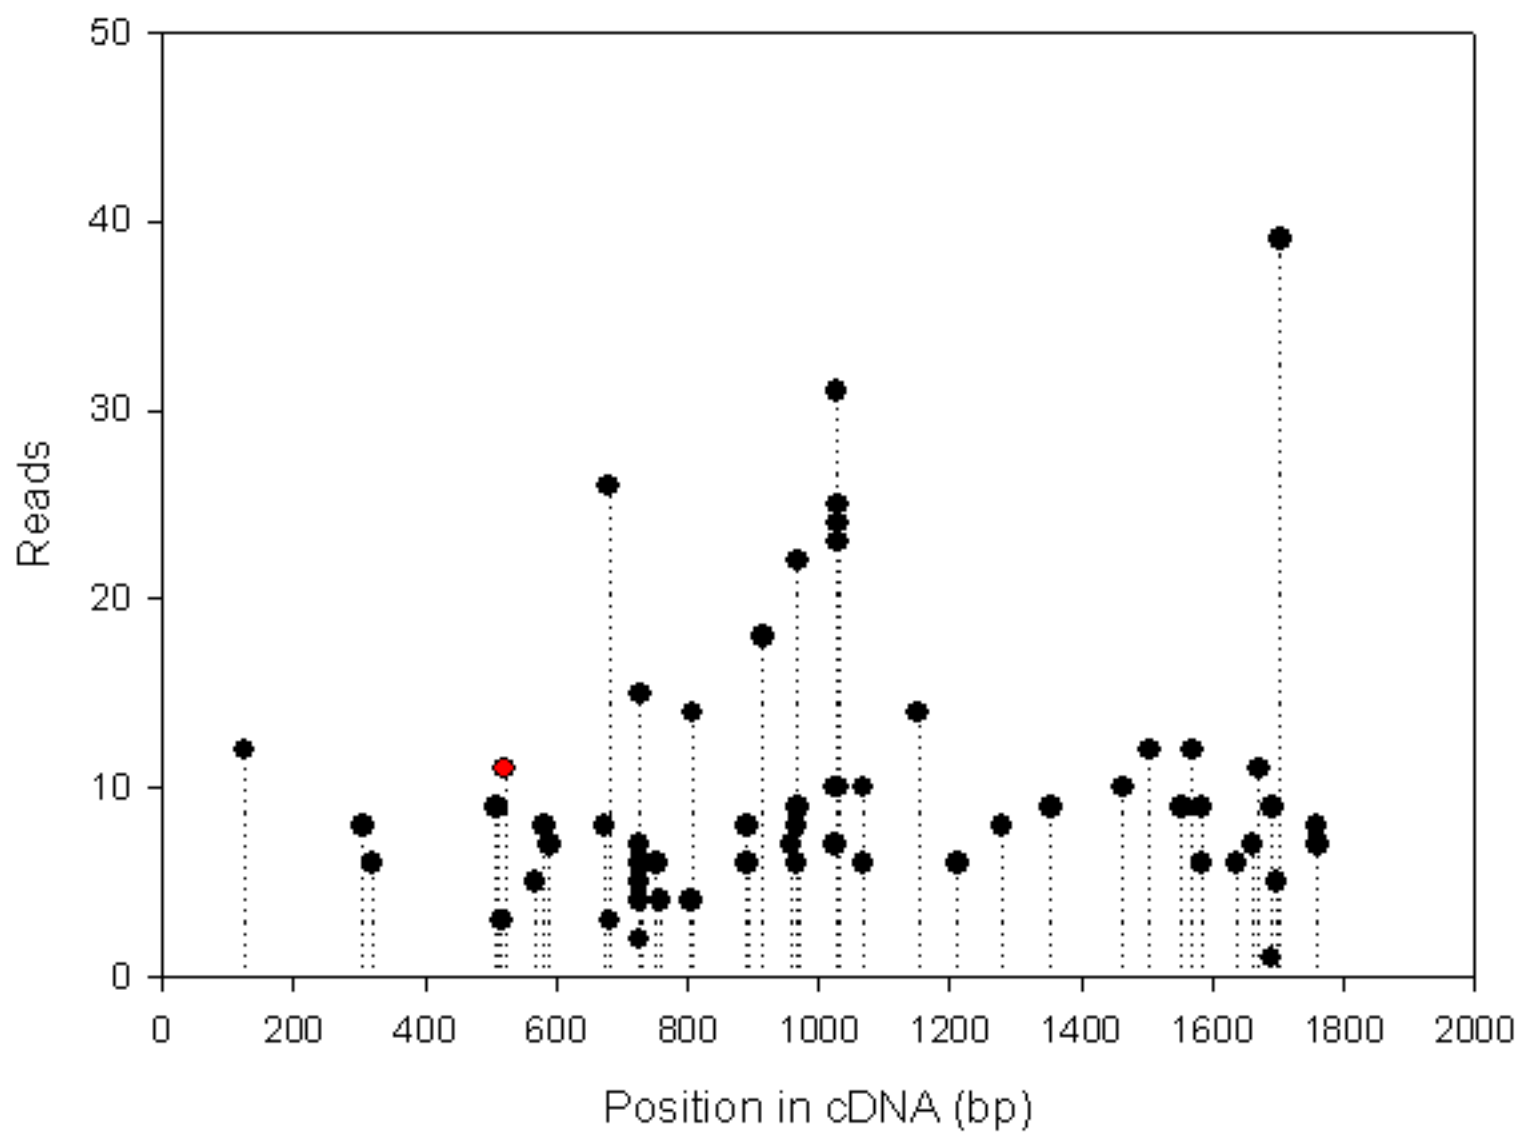

```

5' UUUAGAAUUGCAGAAAACCAACGGA 3'          Cs4g12820.1
   :  ::  ::::  :::::
3' -ACUCUAUAACCUCUUUUGGUUU--- 5'          Csi-miR2275f

```

Csi-miR319, target=Cs3g06390.1 gene=Cs3g06390  
 Category=1  
 Score=4  
 Cleavage Site=773

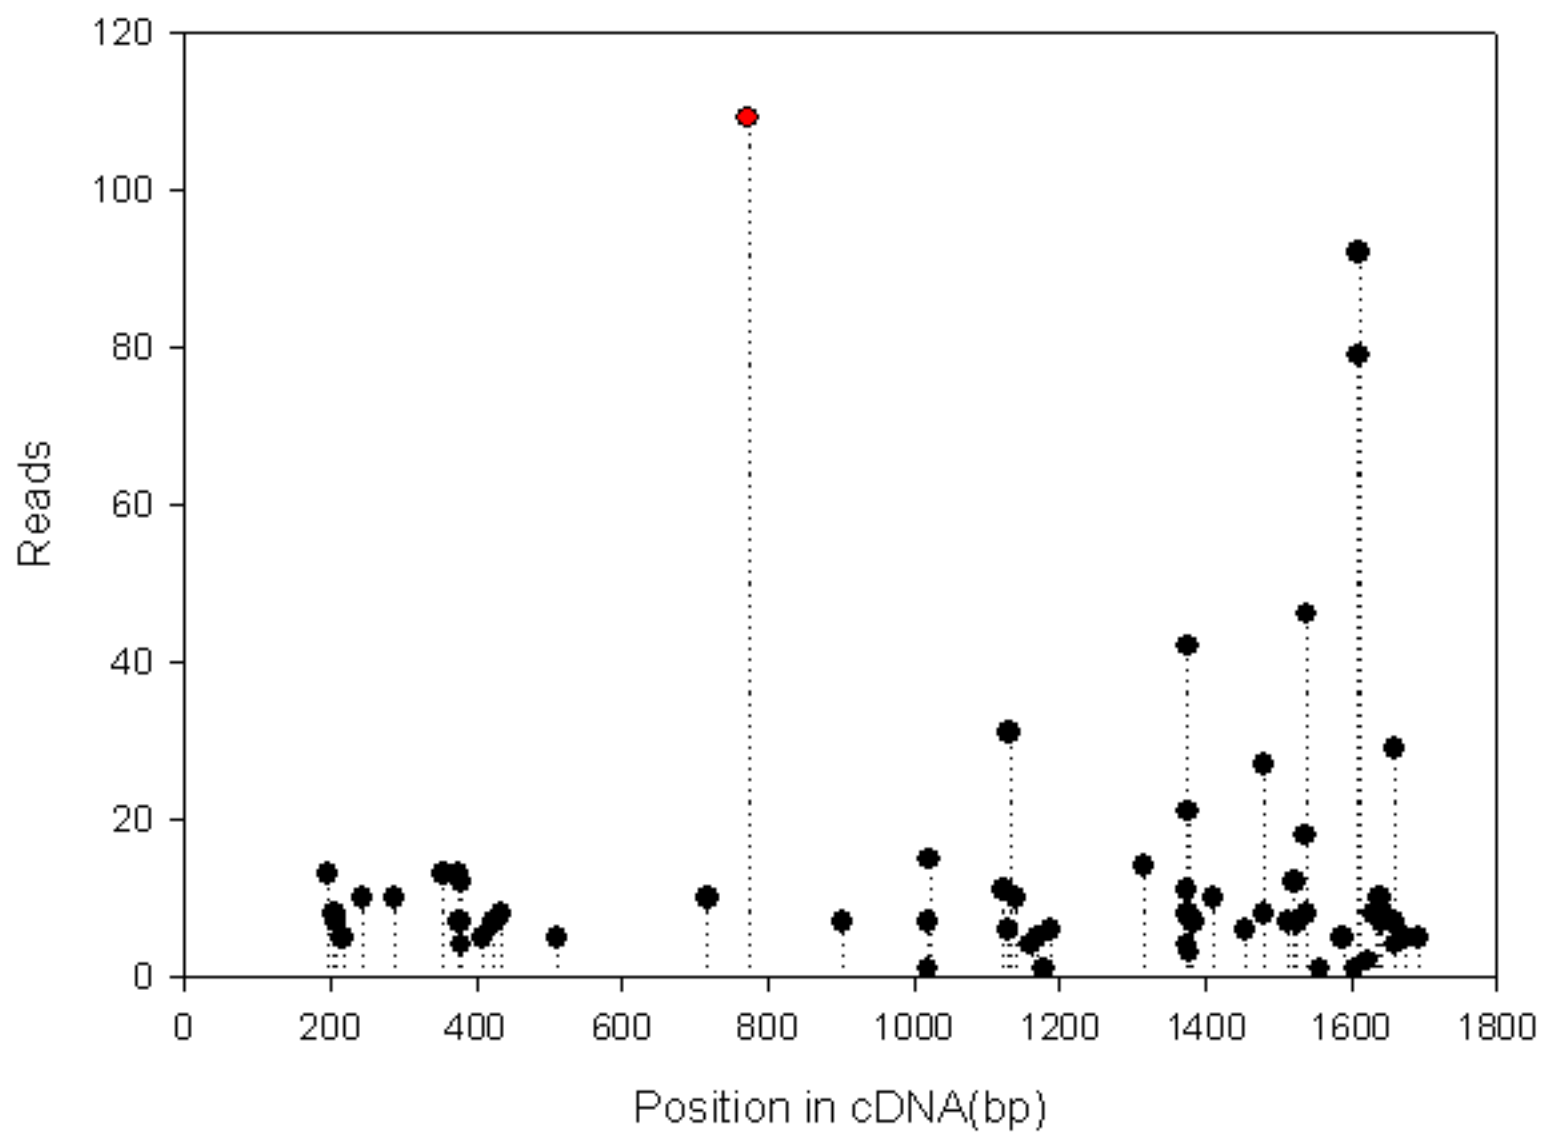

```

5' UUGGAGCUCUCCUUCACUCCAAUAUAC 3'      Cs3g06390.1
   ::::::::::::::: :::::
3' -UCCUCGAGGGAAGUCAGGUUU---- 5'      Csi-miR319
  
```

Csi-miR319a, target=Cs1g06290.1 gene=Cs1g06290  
Category=3  
Score=3  
Cleavage Site=1242

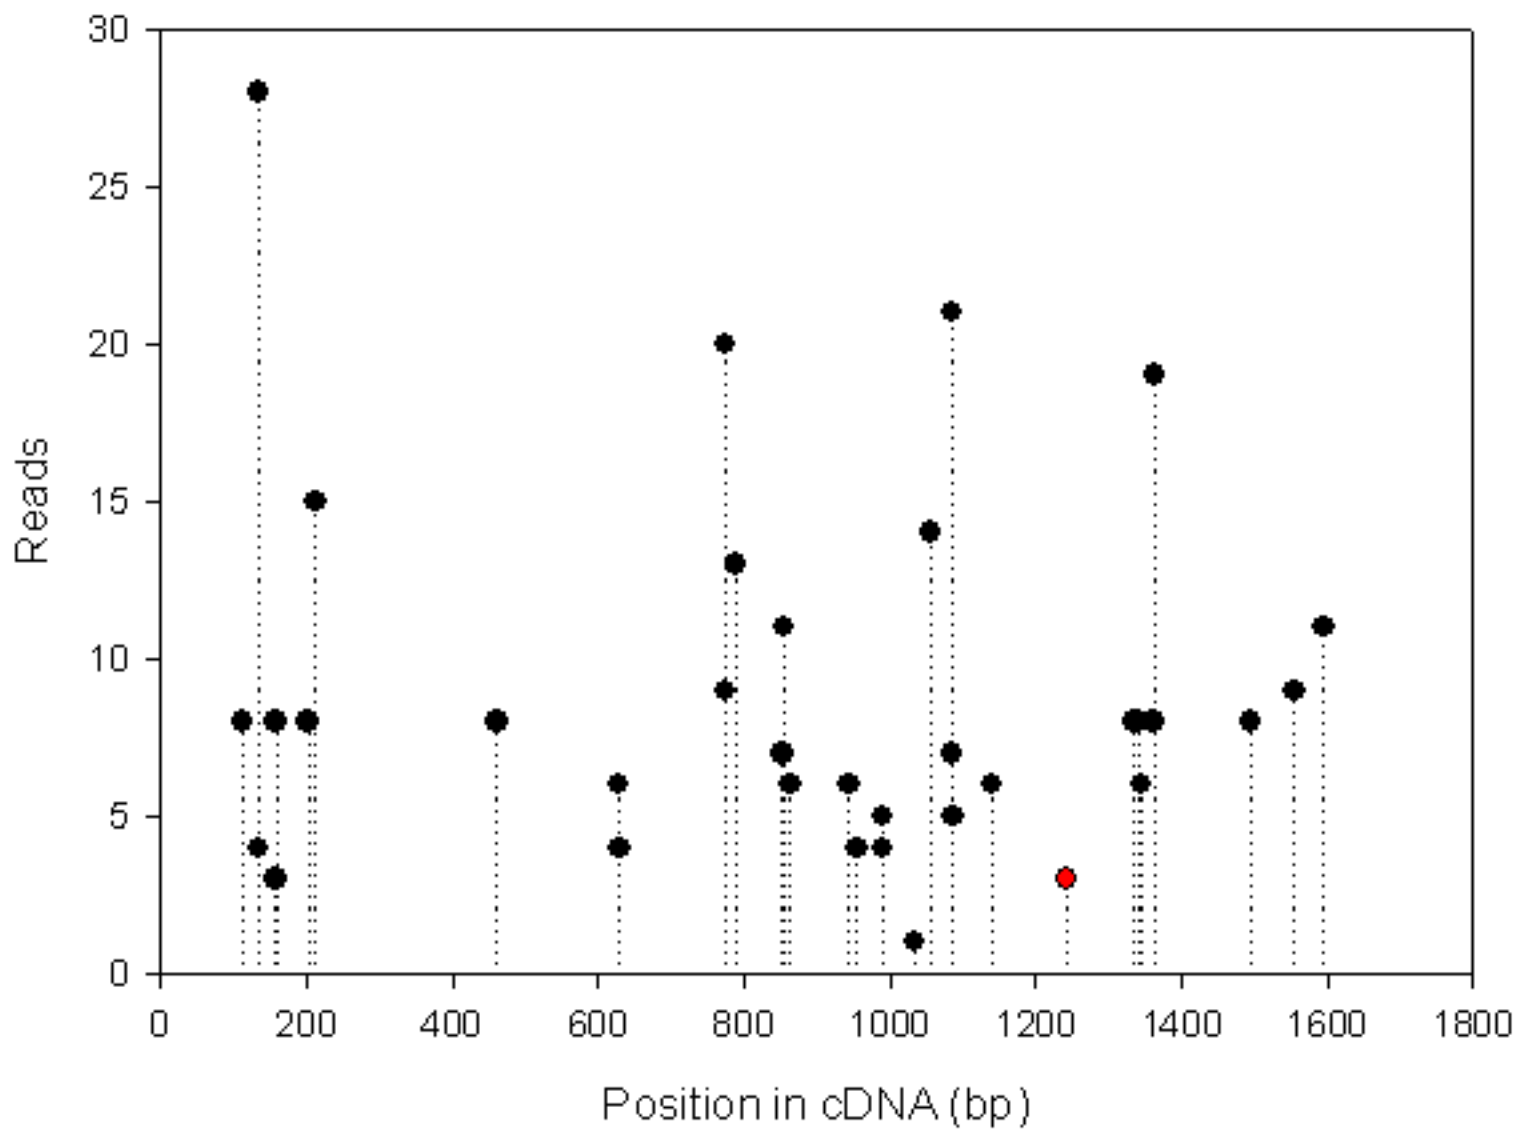

```
5' GUGCGGAUGAAUGAGUUGGUAGUUCA 3'
    ::::::::::::::::::::::::::::
3' ---ACUUACUUACUCAGCCGUCGA-- 5'
```

Cs1g06290.1

Csi-miR319a

Csi-miR319b, target=Cs3g06390.1 gene=Cs3g06390  
 Category=1  
 Score=3  
 Cleavage Site=773



```

5' UGGAGCUCUCCUUCACUCCAAUAUAC 3'      Cs3g06390.1
   ::::::::::::::::::::
3' -CCCUCGAGGGAAGUCAGGU----- 5'      Csi-miR319b
  
```

Csi-miR390.1, target=Cs9g01780.1 gene=Cs9g01780  
 Category=1  
 Score=4.5  
 Cleavage Site=495

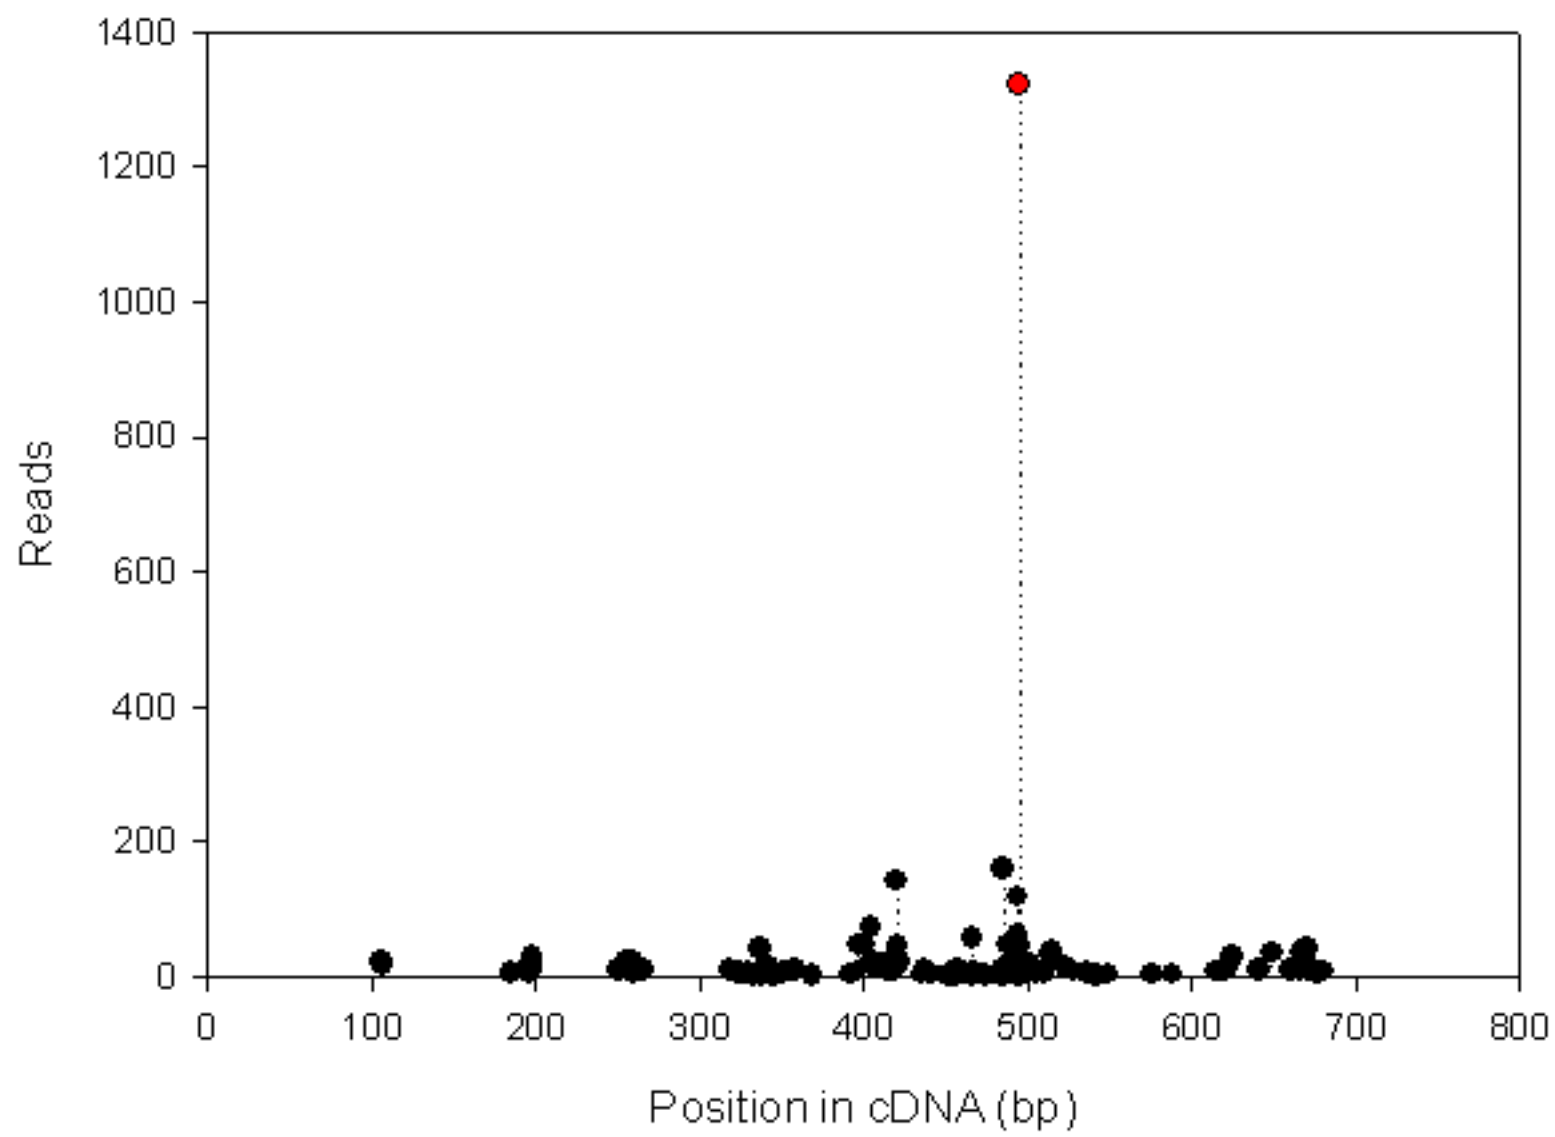

```

5' CUUCCUUGUCUAUCCCUCUGAGCUG 3'          Cs9g01780.1
   .. : : : : : : : : : : : : : :
3' ----CCGC-GAUAGGGAGGACUCGAA 5'        Csi-miR390.1

```



Csi-miR390.2, target=Cs9g01780.1 gene=Cs9g01780  
 Category=1  
 Score=3.5  
 Cleavage Site=495



```

5' CUUCCUUGUCUAUCCCUCCUGAGCUG 3'          Cs9g01780.1
   . : : : : : : : : : : : : : :
3' ----CCGC-GAUAGGGAGGACUCGA- 5'          Csi-miR390.2

```

Csi-miR390-3p.2, target=Cs8g04530.1 gene=Cs8g04530  
 Category=3  
 Score=5  
 Cleavage Site=871

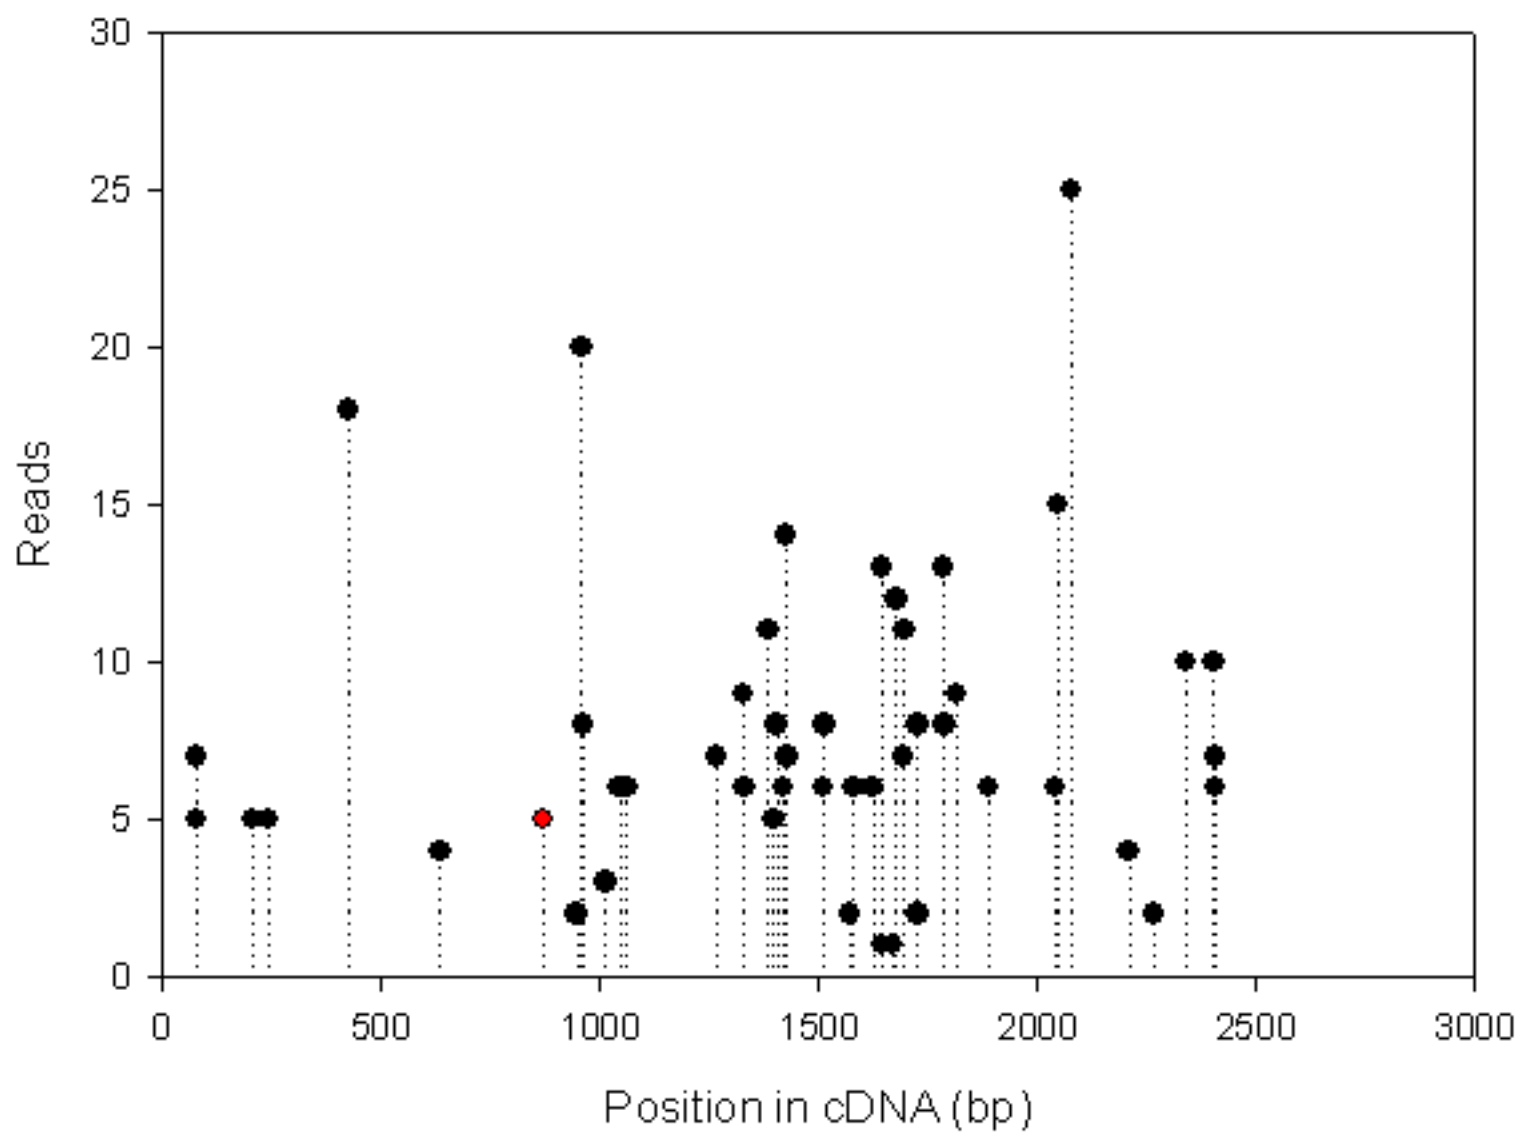

|                                   |                 |
|-----------------------------------|-----------------|
| 5' CAAUGGGGAAGGUUAGGAUGG-UAGCC 3' | Cs8g04530.1     |
| :::. :.::::: ::::                 |                 |
| 3' -----CUUUGAGUCCUACCUAUCGC 5'   | Csi-miR390-3p.2 |

Csi-miR390b, target=Cs9g01780.1 gene=Cs9g01780  
 Category=1  
 Score=0  
 Cleavage Site=495

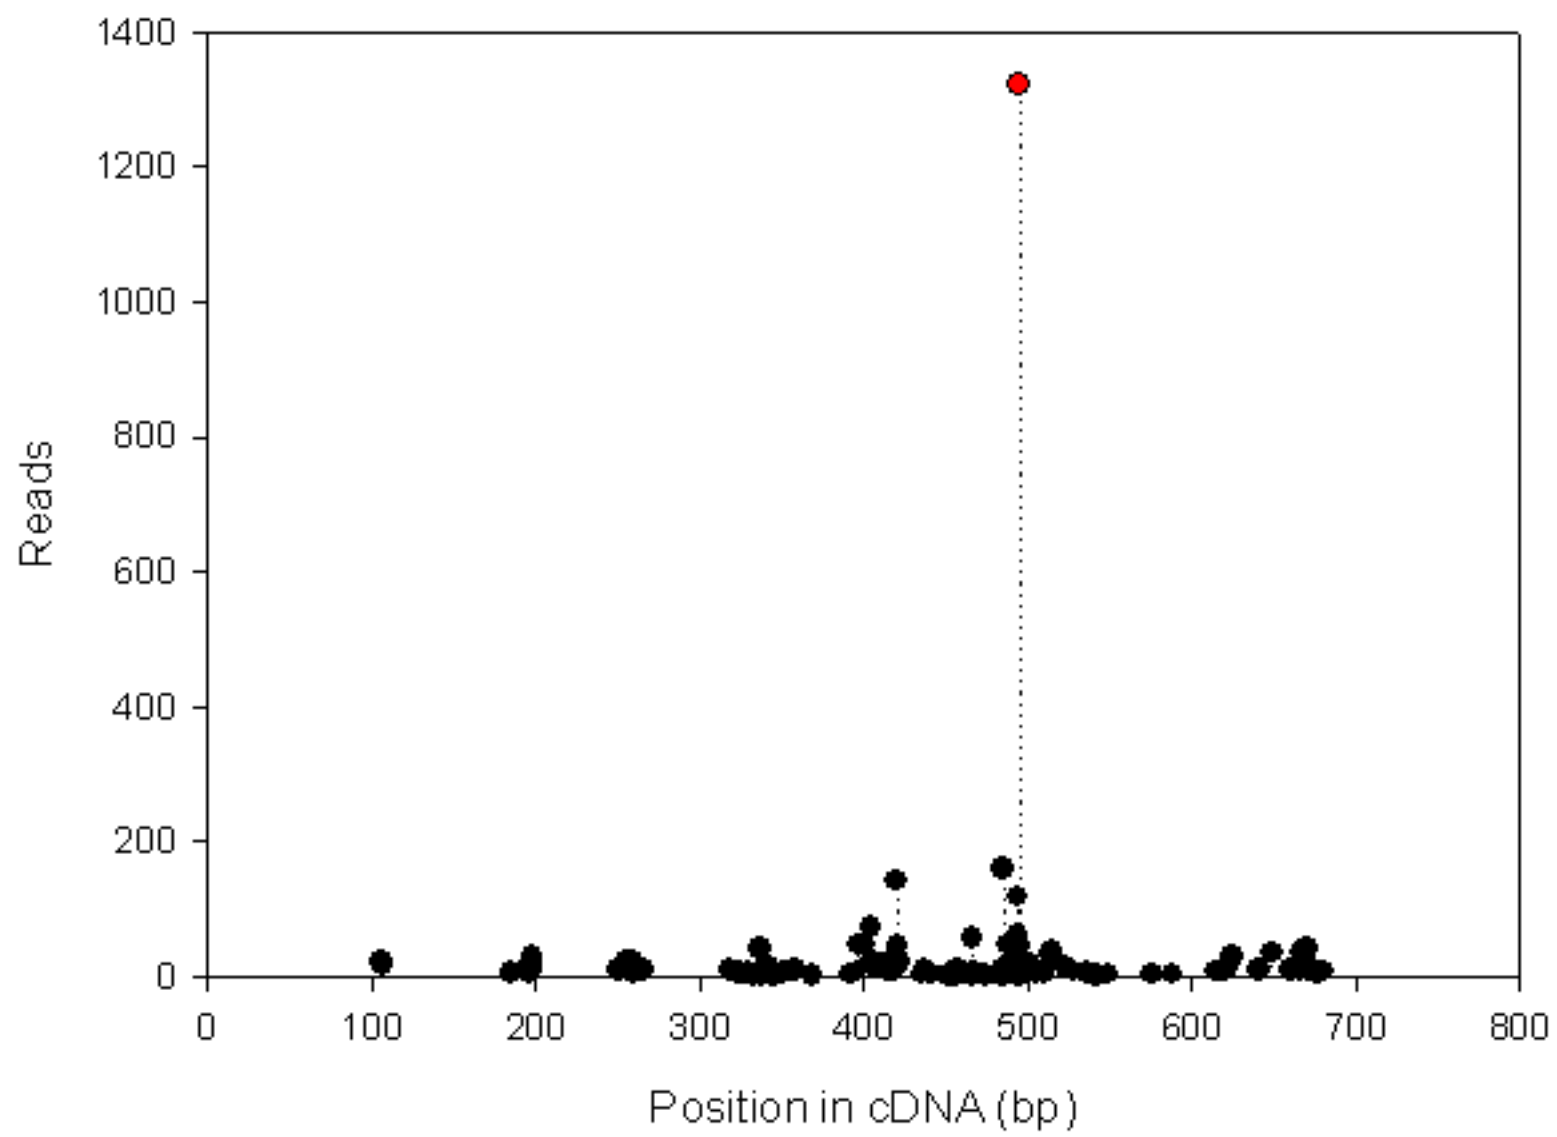

```

5' CUUCCUUGUCUAUCCCUCCUGAGCUG 3'      Cs9g01780.1
   ::::::::::::::::::::::::::::
3' -----AACAGAUAGGGAGGACUCGAC 5'      Csi-miR390b

```

Csi-miR391a.1, target=Cs5g17560.1 gene=Cs5g17560  
 Category=3  
 Score=4.5  
 Cleavage Site=2319

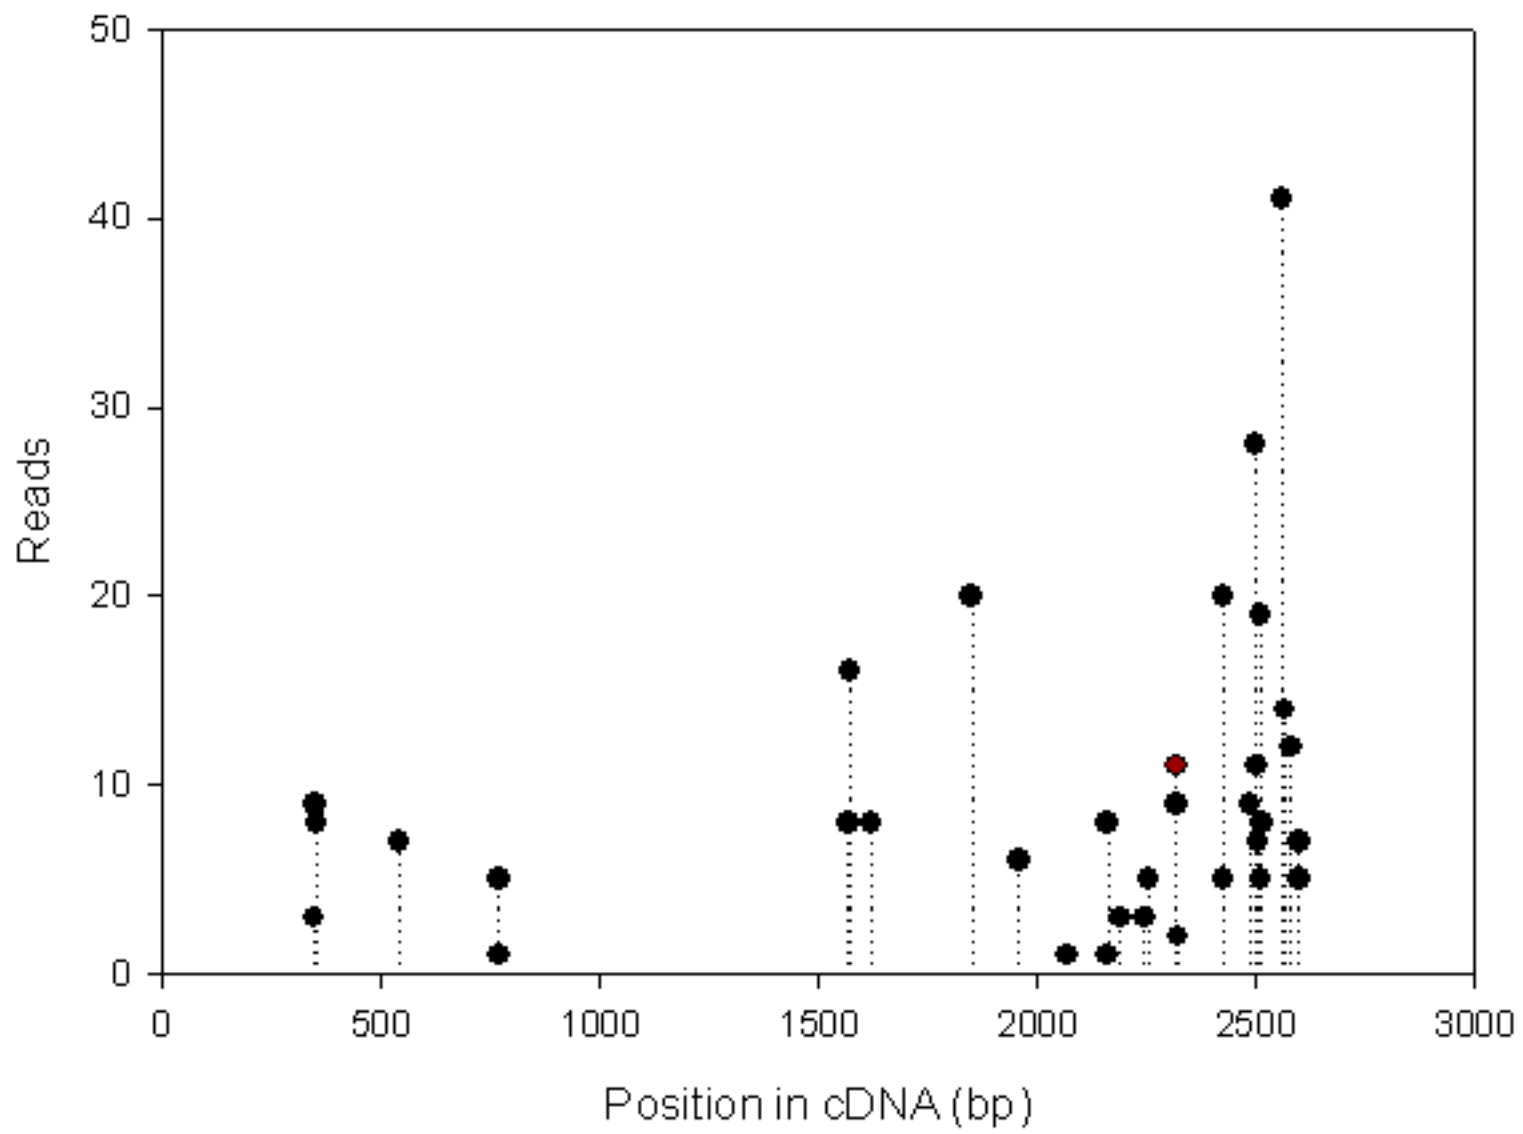

```

5' UUGC-AUUUUUCUGGUGACAAUCUCAA 3'      Cs5g17560.1
   ::: :.:.:.:.:.:.:.:.:.:.
3' -ACGAUAGAGAGGCCGCUGUU----- 5'      Csi-miR391a.1
  
```

Csi-miR393a.1, target=Cs7g31800.1 gene=Cs7g31800  
 Category=3  
 Score=5  
 Cleavage Site=1321

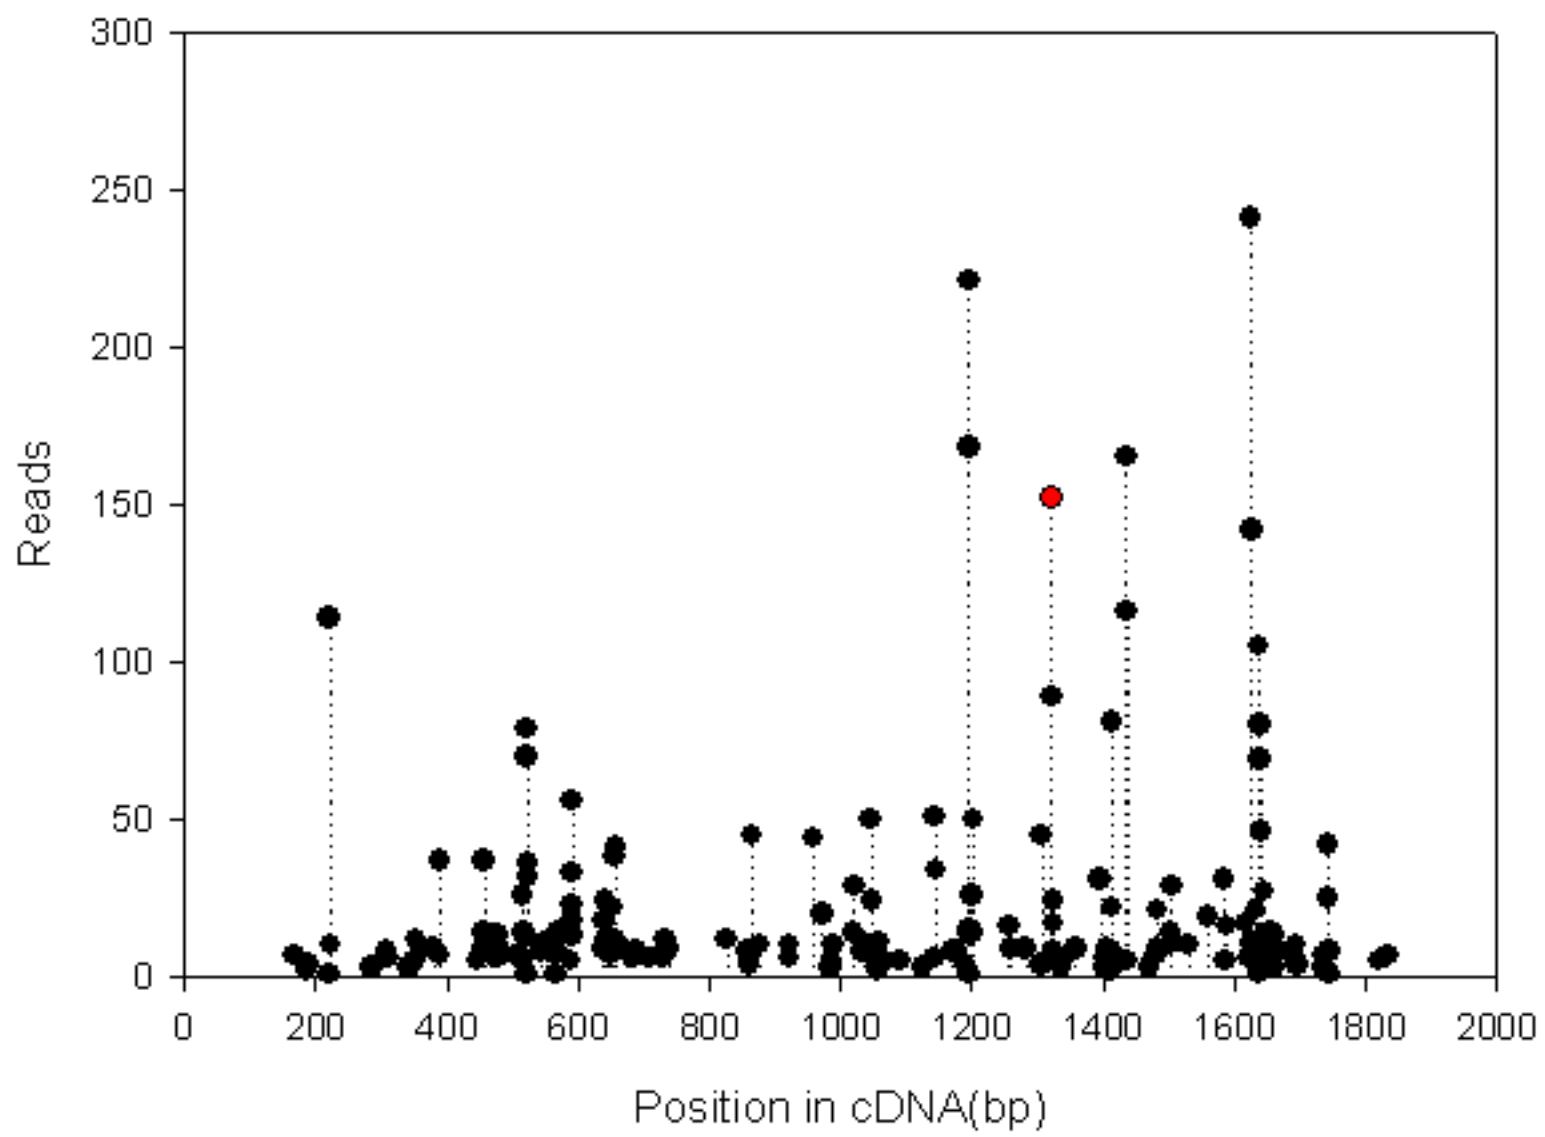

```

5' CCGGCCAAUCCAU-UGAUUUCUUUGGA 3'      Cs7g31800.1
   : : : : : : : : : : : : : : : :
3' -----UAGUUACGCUAGGGAAACCU 5'      Csi-miR393a.1

```

Csi-miR393a.2, target=Orange1.1t02367.1 gene=Orange1.1t02367  
 Category=3  
 Score=3.5  
 Cleavage Site=424

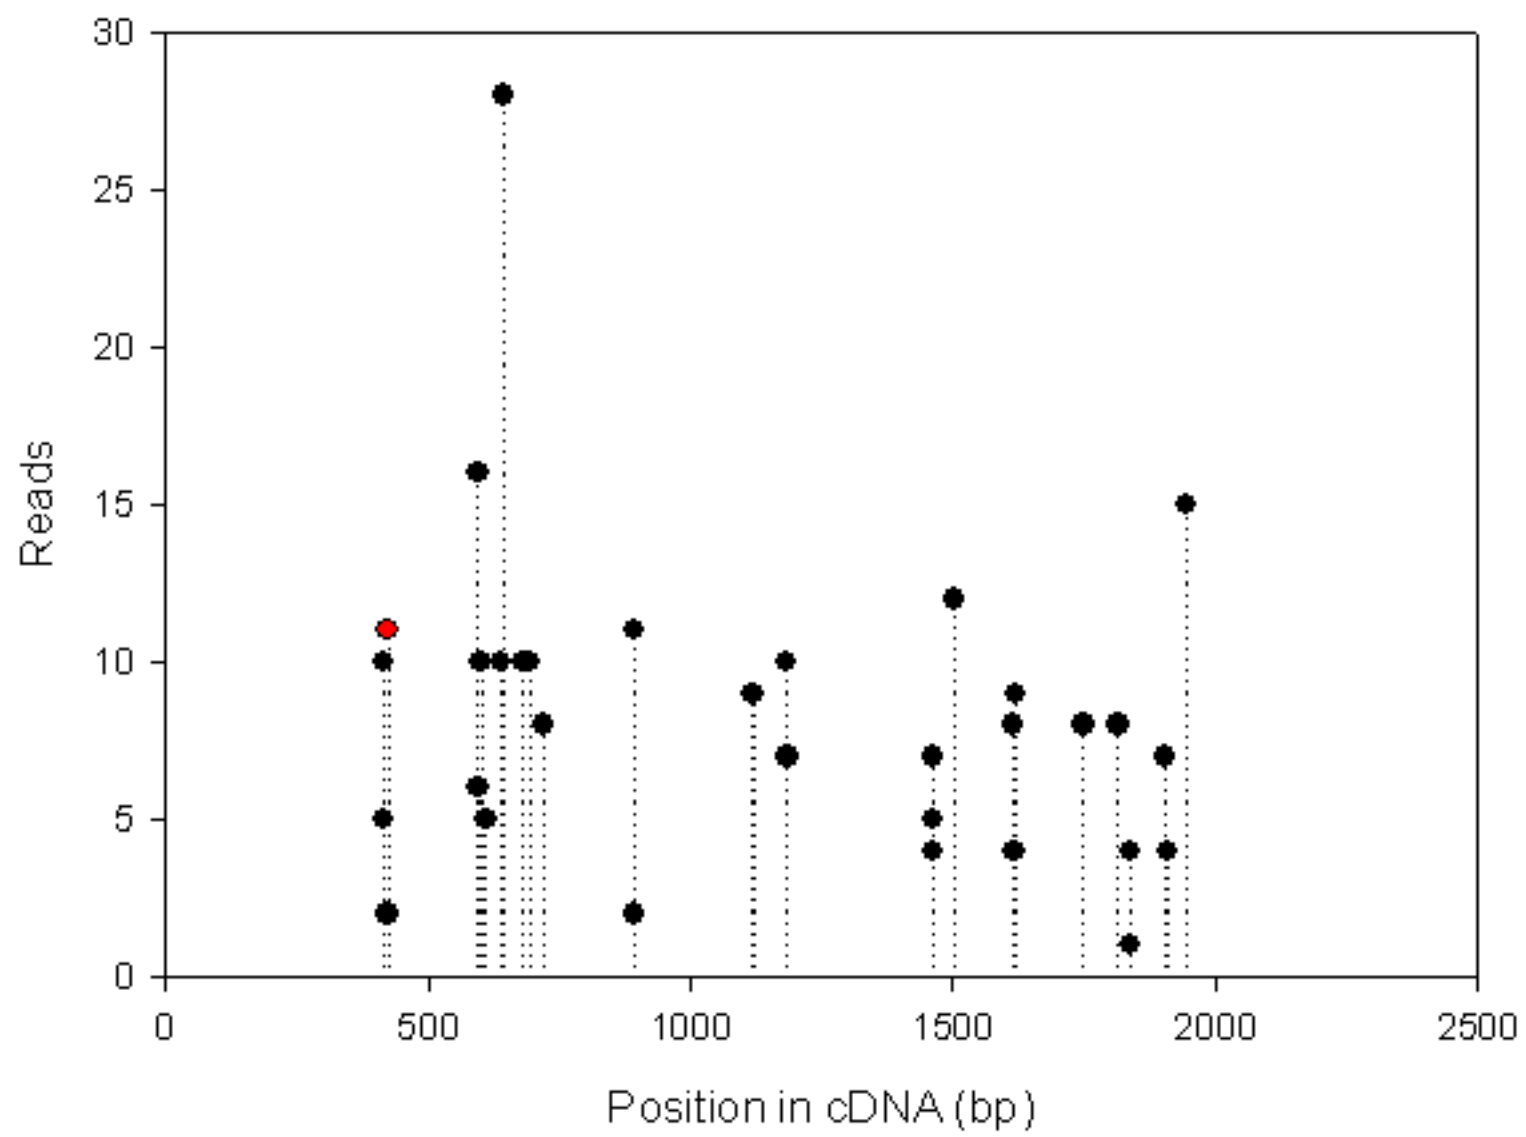

```

5' GGAUCAGAGCGAUCCCUUGAAUCAG 3'
   : : : : : : : : : : : : : : :
3' -CUAGUUACGCUAGGGAAACCU----- 5'

```

Orange1.1t02367.1

Csi-miR393a.2

Csi-miR393a.2-3p, target=Cs9g05070.1 gene=Cs9g05070

Category=3

Score=4

Cleavage Site=1601

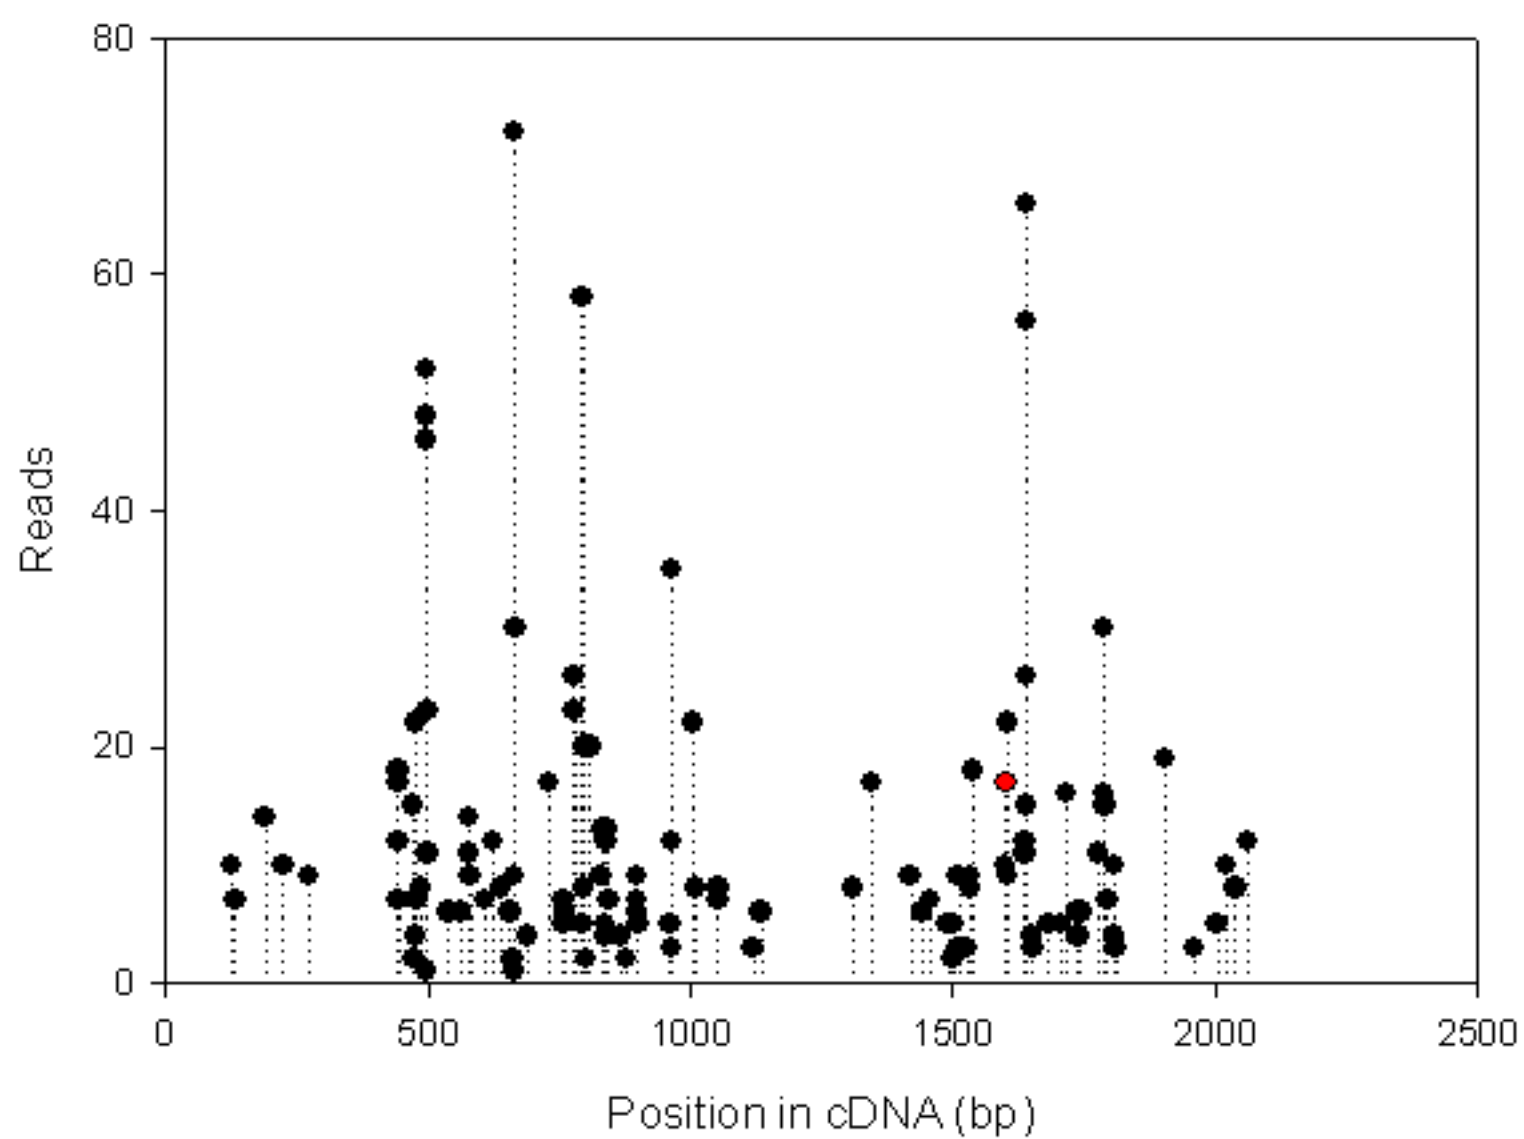

5' UAAUCCGGA-GGAUGGCAUGAUUCUUG 3'

Cs9g05070.1

.....

3' -UUAGGUUCCCUAUCGUACUA----- 5'

Csi-miR393a.2-3p

Csi-miR393a.3, target=Orange1.1t02367.1 gene=Orange1.1t02367  
 Category=3  
 Score=3.5  
 Cleavage Site=424



5' GGAUCAGAGCGAUCCCUUGAAUCAG 3'  
 :::::::::: :::::::::: ::  
 3' CCUAGUUACGCUAGGGAAACCU---- 5'

Orange1.1t02367.1  
 Csi-miR393a.3



Csi-miR393b, target=Orange1.1t02367.1 gene=Orange1.1t02367  
 Category=3  
 Score=4.5  
 Cleavage Site=424

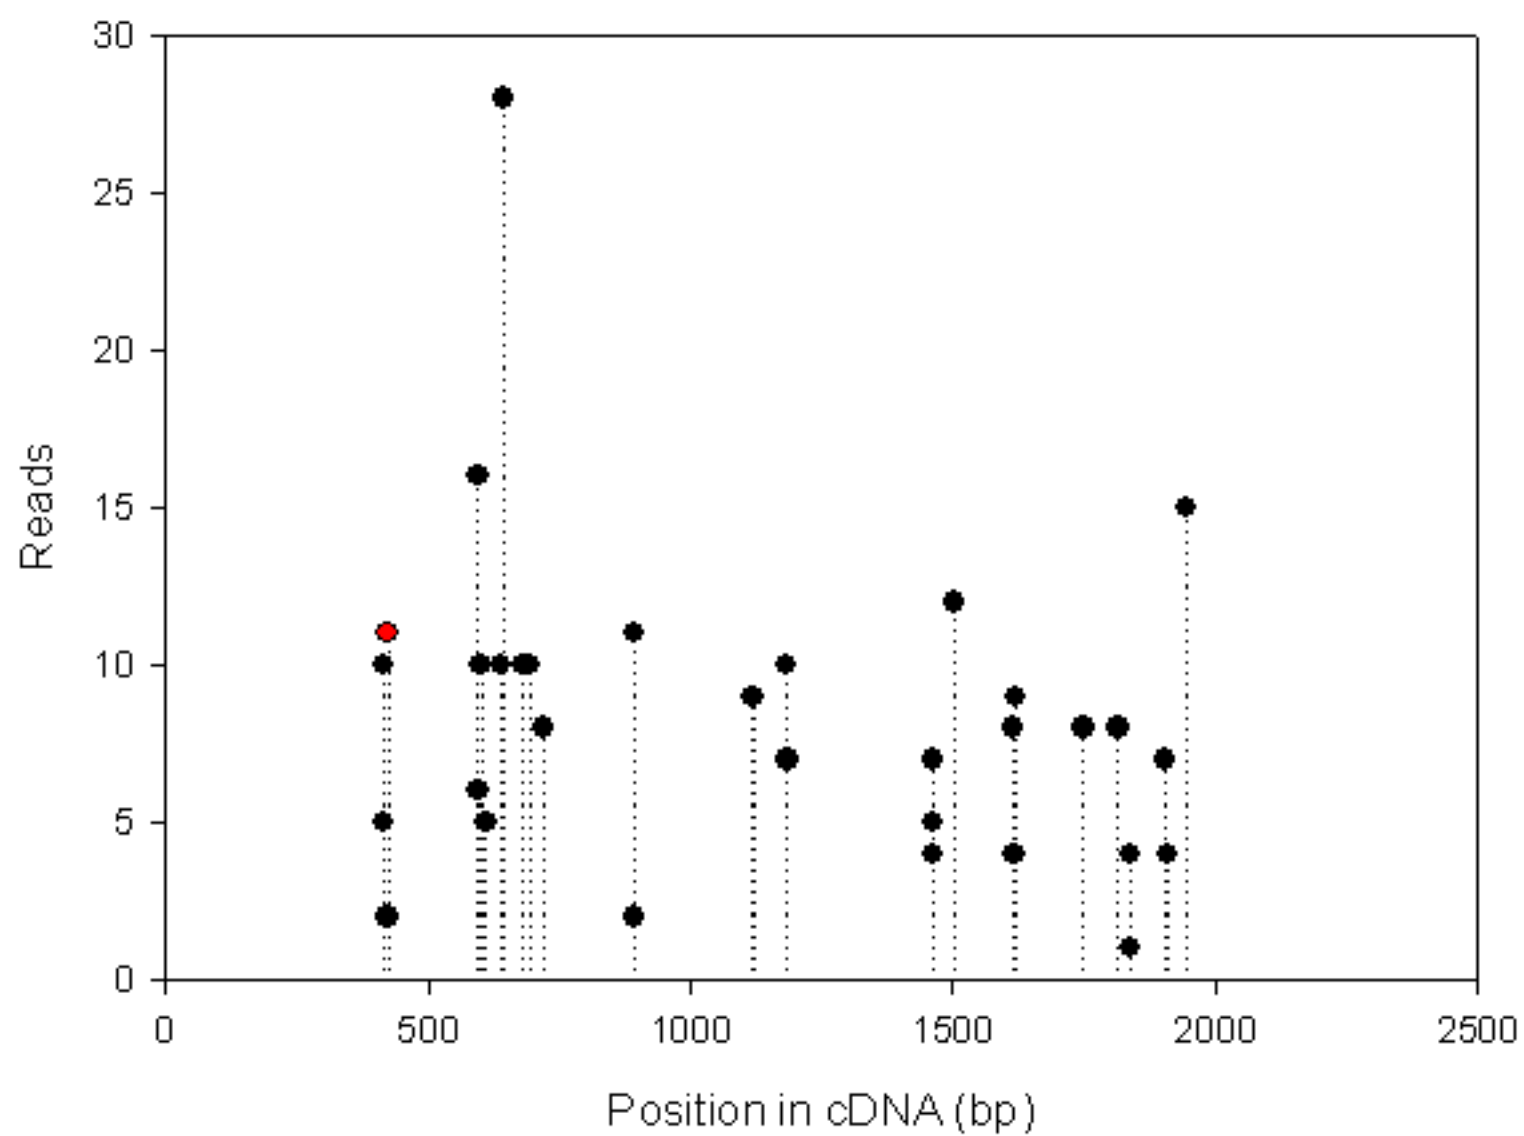

```

5' GGAUCAGAGCGAUCCCUUGAAUCAG 3' Orange1.1t02367.1
   :::::  :::::  :::::  :
3' -CUAGUUACGCUAGGGAAACCUU--- 5' Csi-miR393b

```

Csi-miR393b-3p,target=Cs5g31220.1 gene=Cs5g31220  
 Category=3  
 Score=5  
 Cleavage Site=483

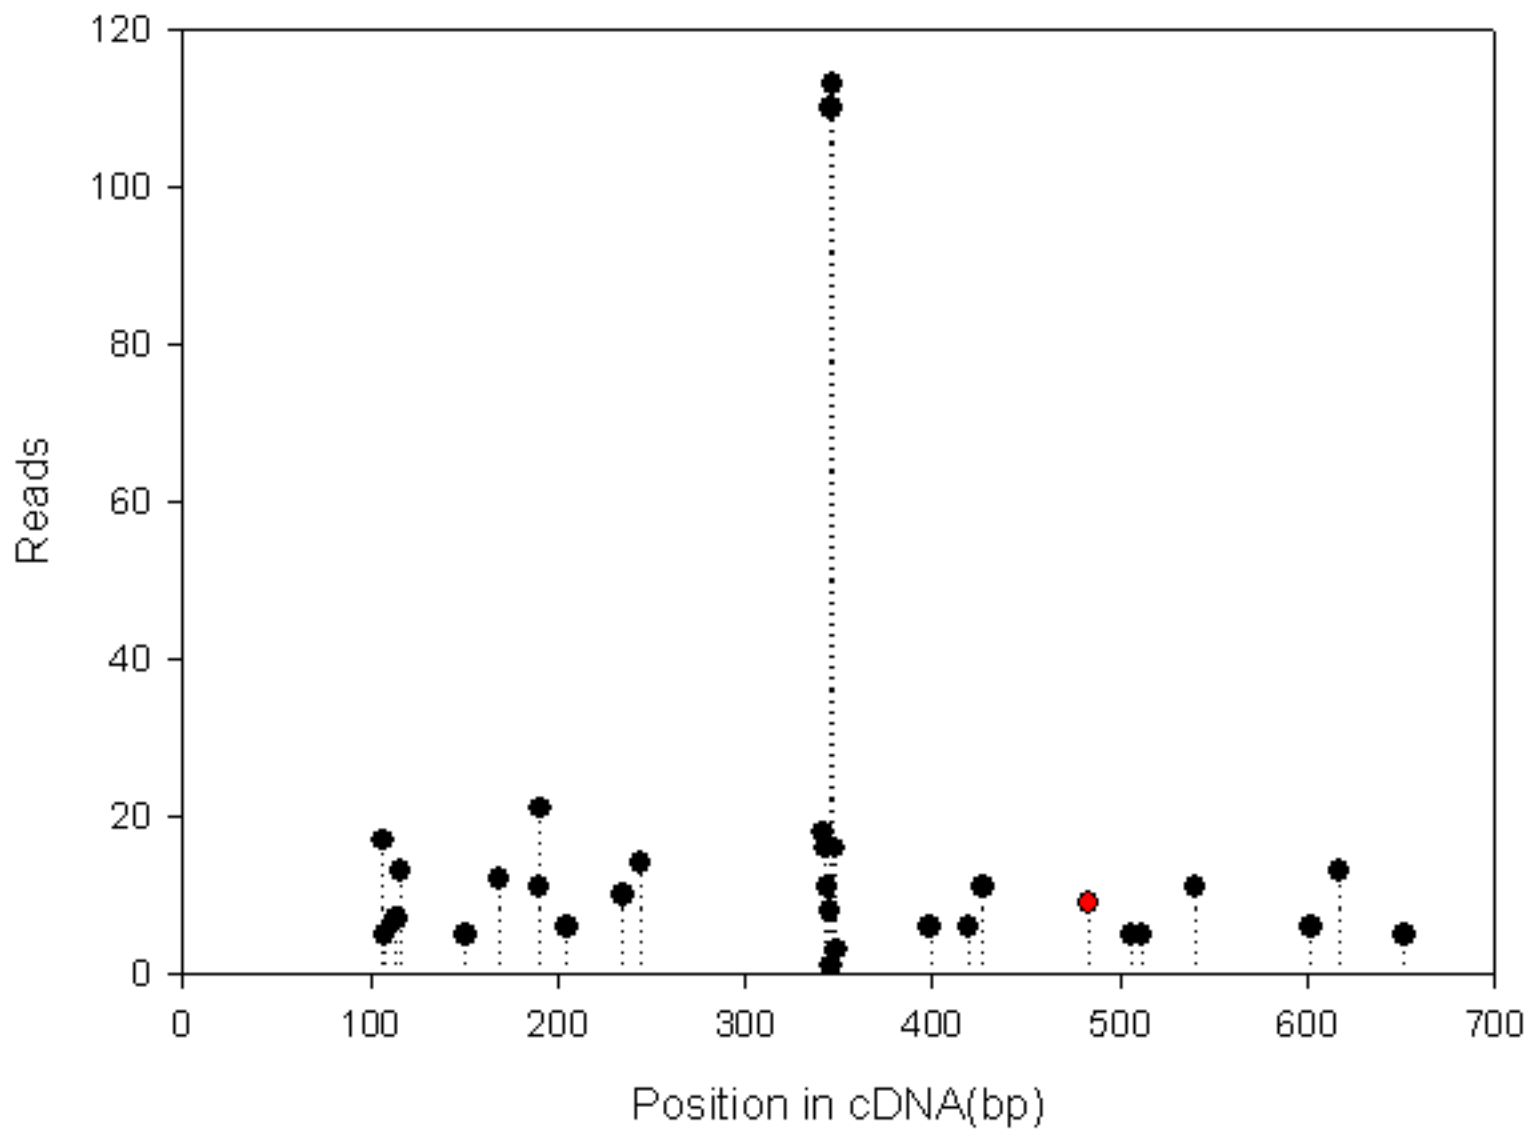

```

5' AAUUCCUAAGGGAUC-UGUGAUUGAGC 3'           Cs5g31220.1
   :::::  :::::  ..:::
3' UUAAGGCUUCCCUAGCGUACU----- 5'           Csi-miR393b-3p

```

Csi-miR394, target=Cs5g08980.1 gene=Cs5g08980  
 Category=3  
 Score=3.5  
 Cleavage Site=2526

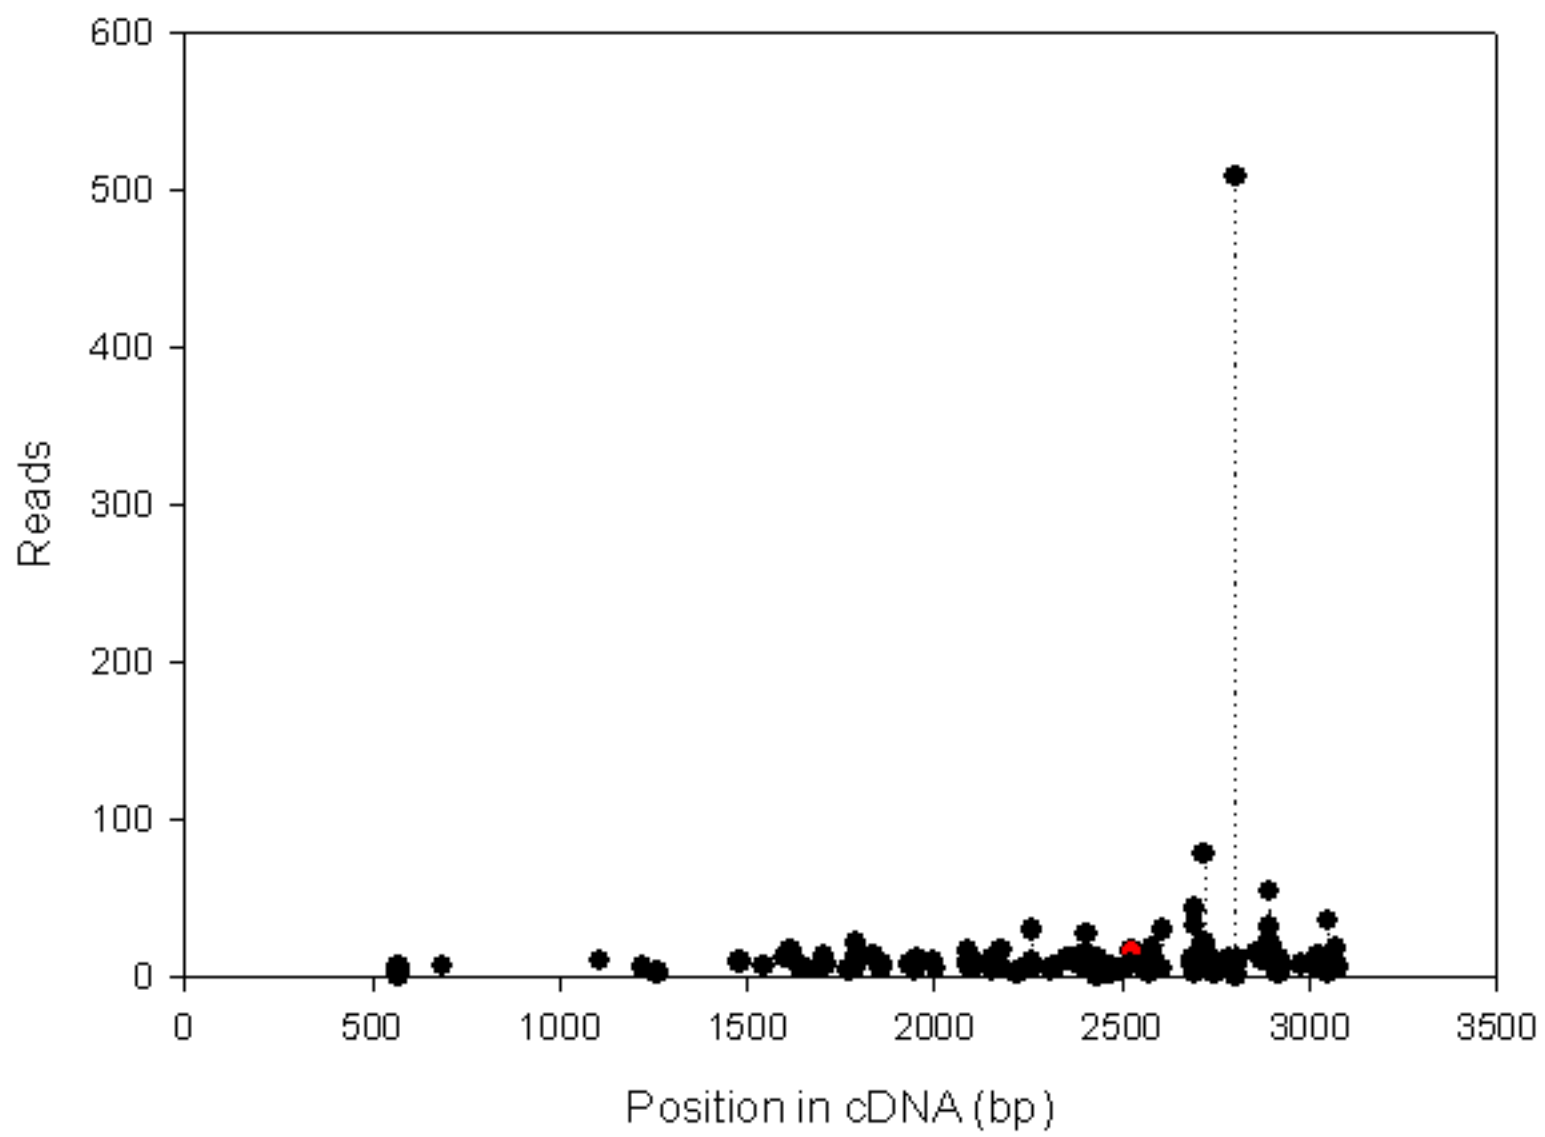

```

5' GGGCCCGGACAGAAUGCCAUGUGGA 3' Cs5g08980.1
   . . . . .
3' CCUCCACCUGUCUUACGGUU----- 5' Csi-miR394

```

Csi-miR394-3p.1, target=Cs3g09210.1 gene=Cs3g09210  
 Category=3  
 Score=5  
 Cleavage Site=1866

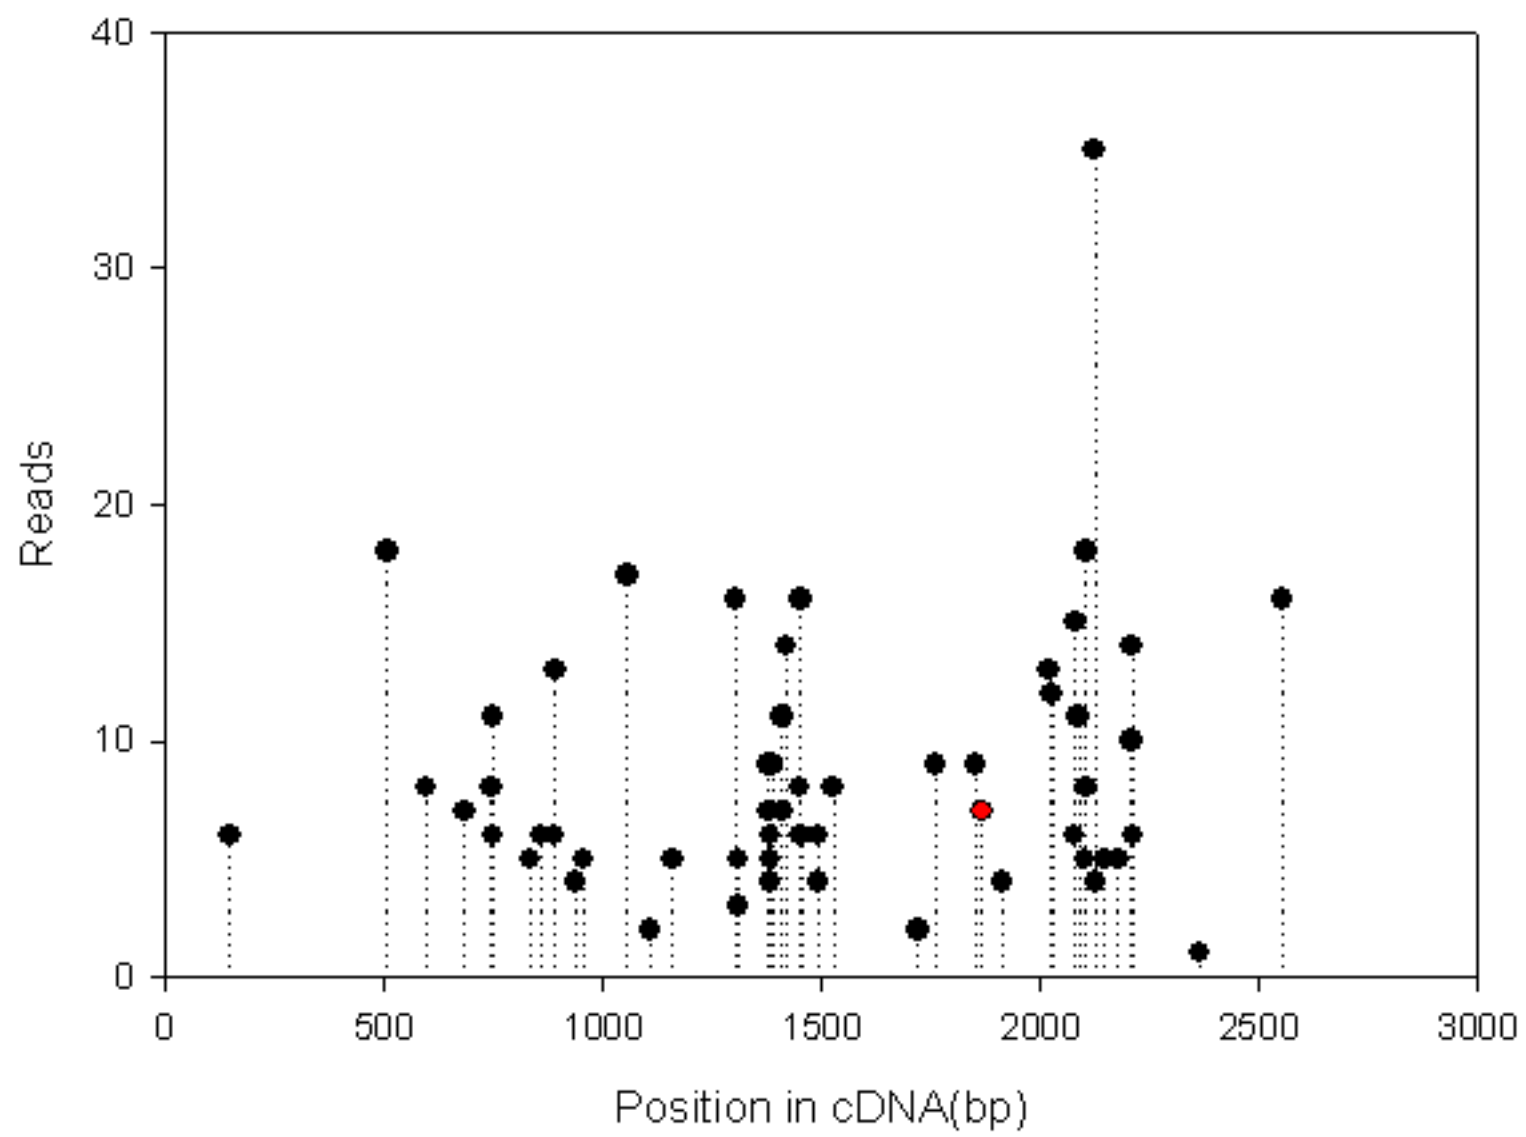

```

5' GUUUGUUUGGAAUUU-UCUAGCUGAUA 3'      Cs3g09210.1
   : : : : : : : : : : : : : : : :
3' --AUCAAACGUUAAACAGGUCGA---- 5'      Csi-miR394-3p.1
  
```

Csi-miR394-3p.2, target=Cs8g14600.1 gene=Cs8g14600  
 Category=3  
 Score=5  
 Cleavage Site=996

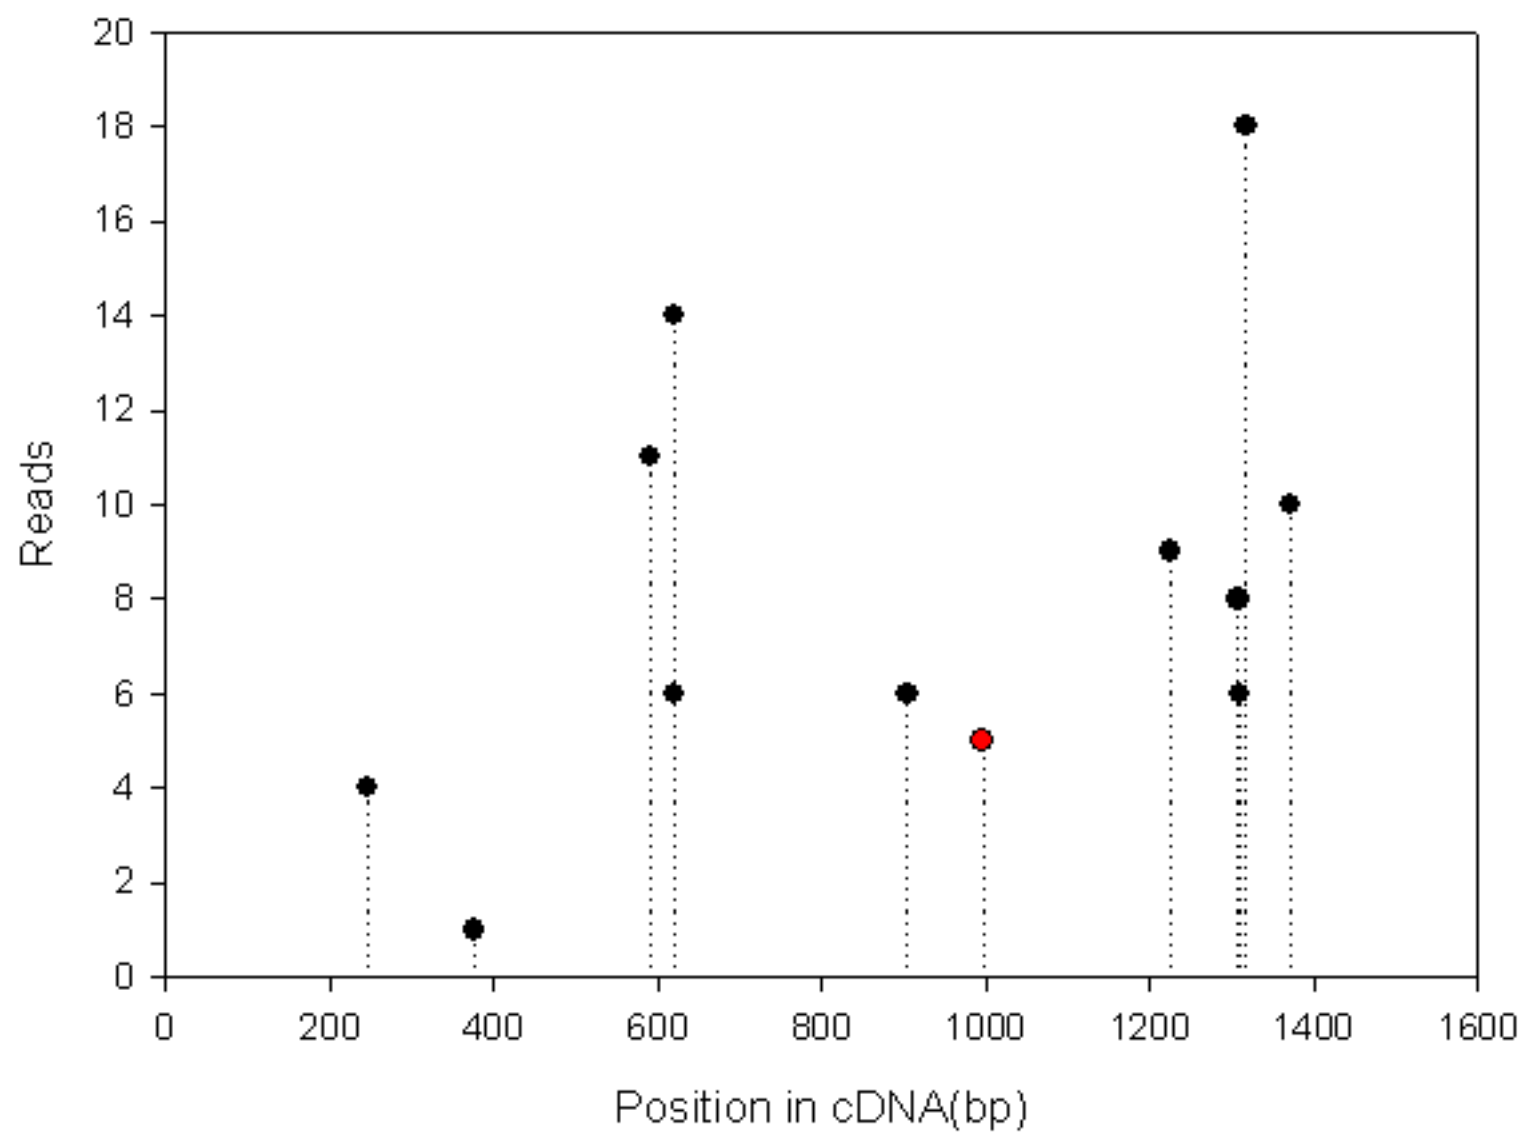

|                                           |                 |
|-------------------------------------------|-----------------|
| 5' UGAAG-CUGCAGUUUGUCCAUCCAAAC 3'         | Cs8g14600.1     |
| : : : : : : : : : : : : : : : : : : : : : |                 |
| 3' ACAUCAAAACGUUAAACAGGUC----- 5'         | Csi-miR394-3p.2 |

Csi-miR395.1, target=Orange1.1t01708.1 gene=Orange1.1t01708  
 Category=3  
 Score=4.5  
 Cleavage Site=1338

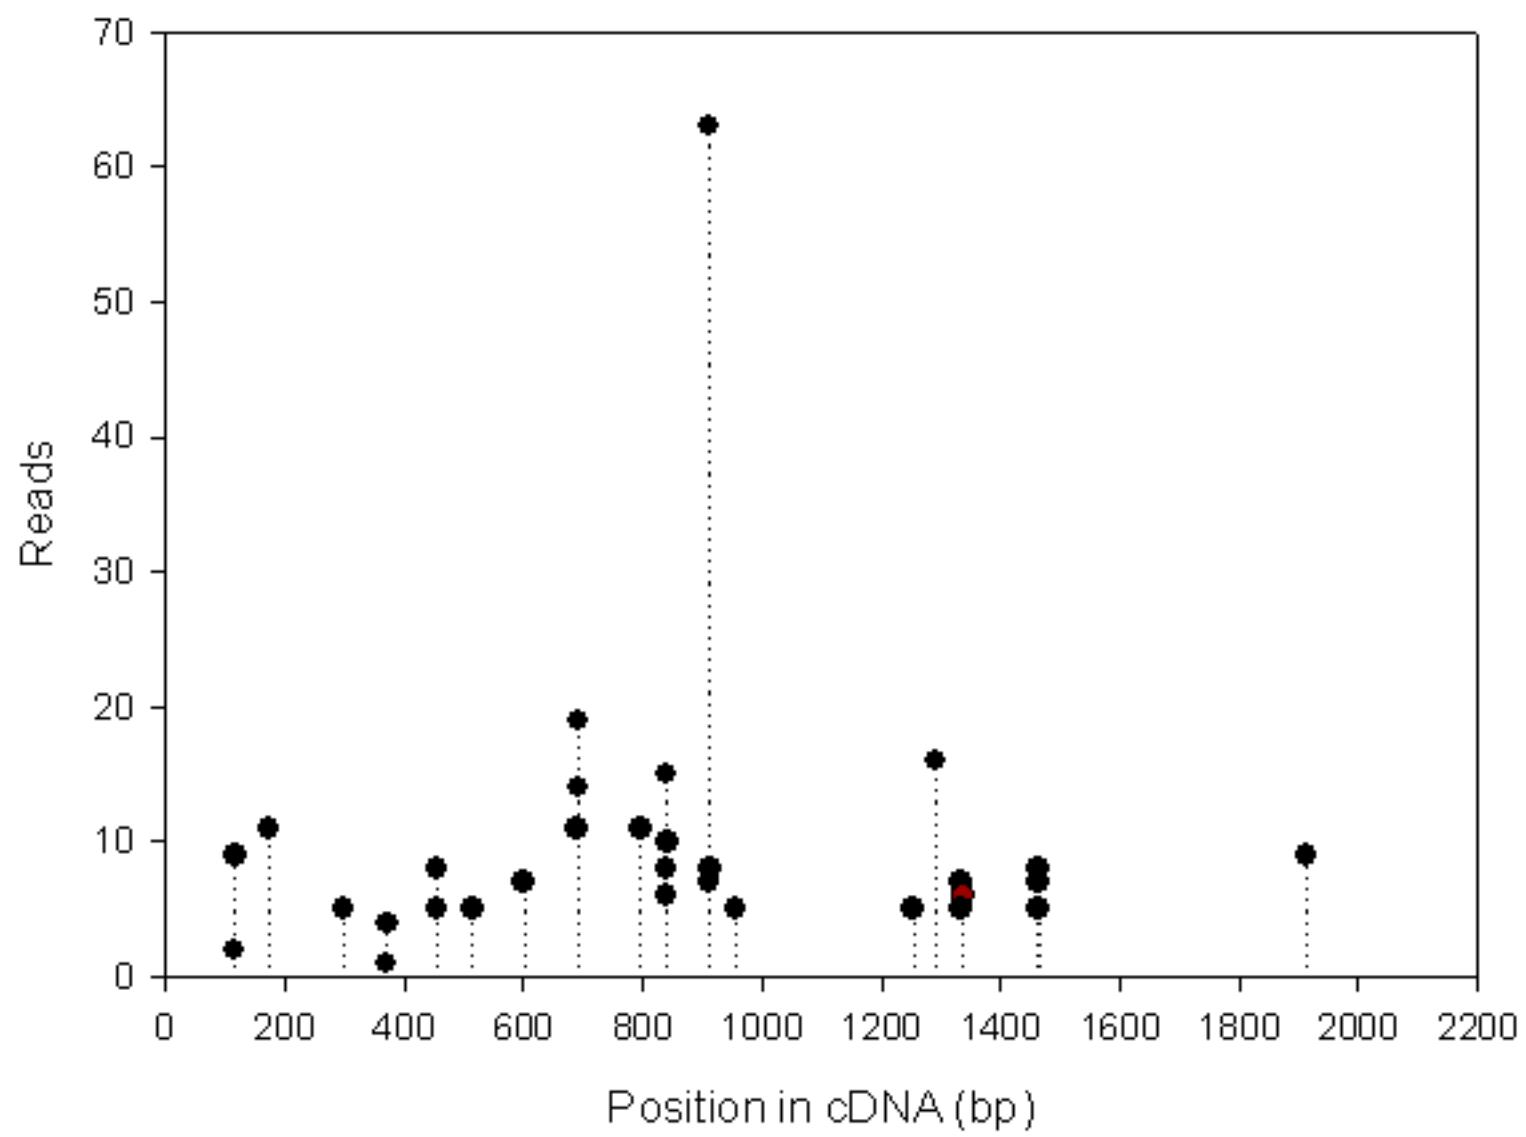

```

5' AACCGGGCU-CACCAAUACUUCAGAU 3'      Orange1.1t01708.1
   : : : : : : : : : : : : : : :
3' ----CUCAAGGGGGUUUGUGAAGUC-- 5'      Csi-miR395.1
  
```

Csi-miR395.2, target=Cs5g34330.1 gene=Cs5g34330  
 Category=3  
 Score=5  
 Cleavage Site=1443

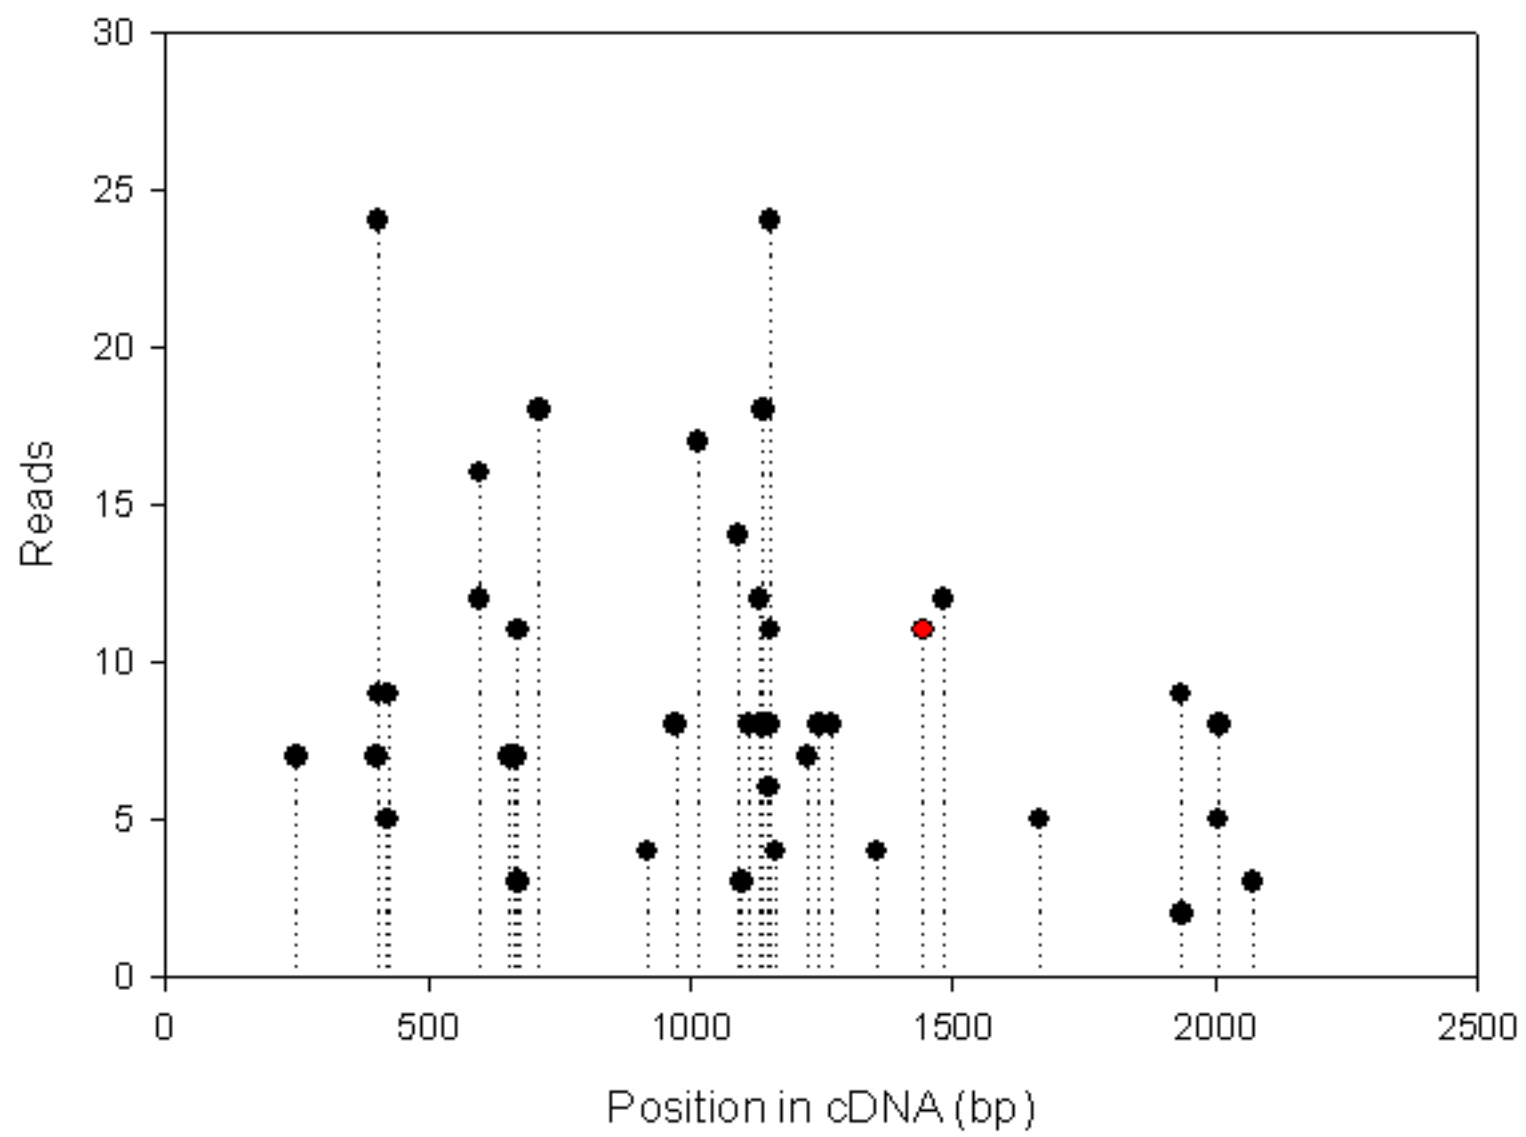

```

5' UUUUUAAGUU-UCCCAGACACUUUGGC 3'      Cs5g34330.1
      : : : : . : : : . : : : . : : : . :
3' -----CUCAAGGGGGUUUGUGAAGU-- 5'      Csi-miR395.2

```

Csi-miR3951, target=Orange1.1t05622.1 gene=Orange1.1t05622  
 Category=1  
 Score=2.5  
 Cleavage Site=113

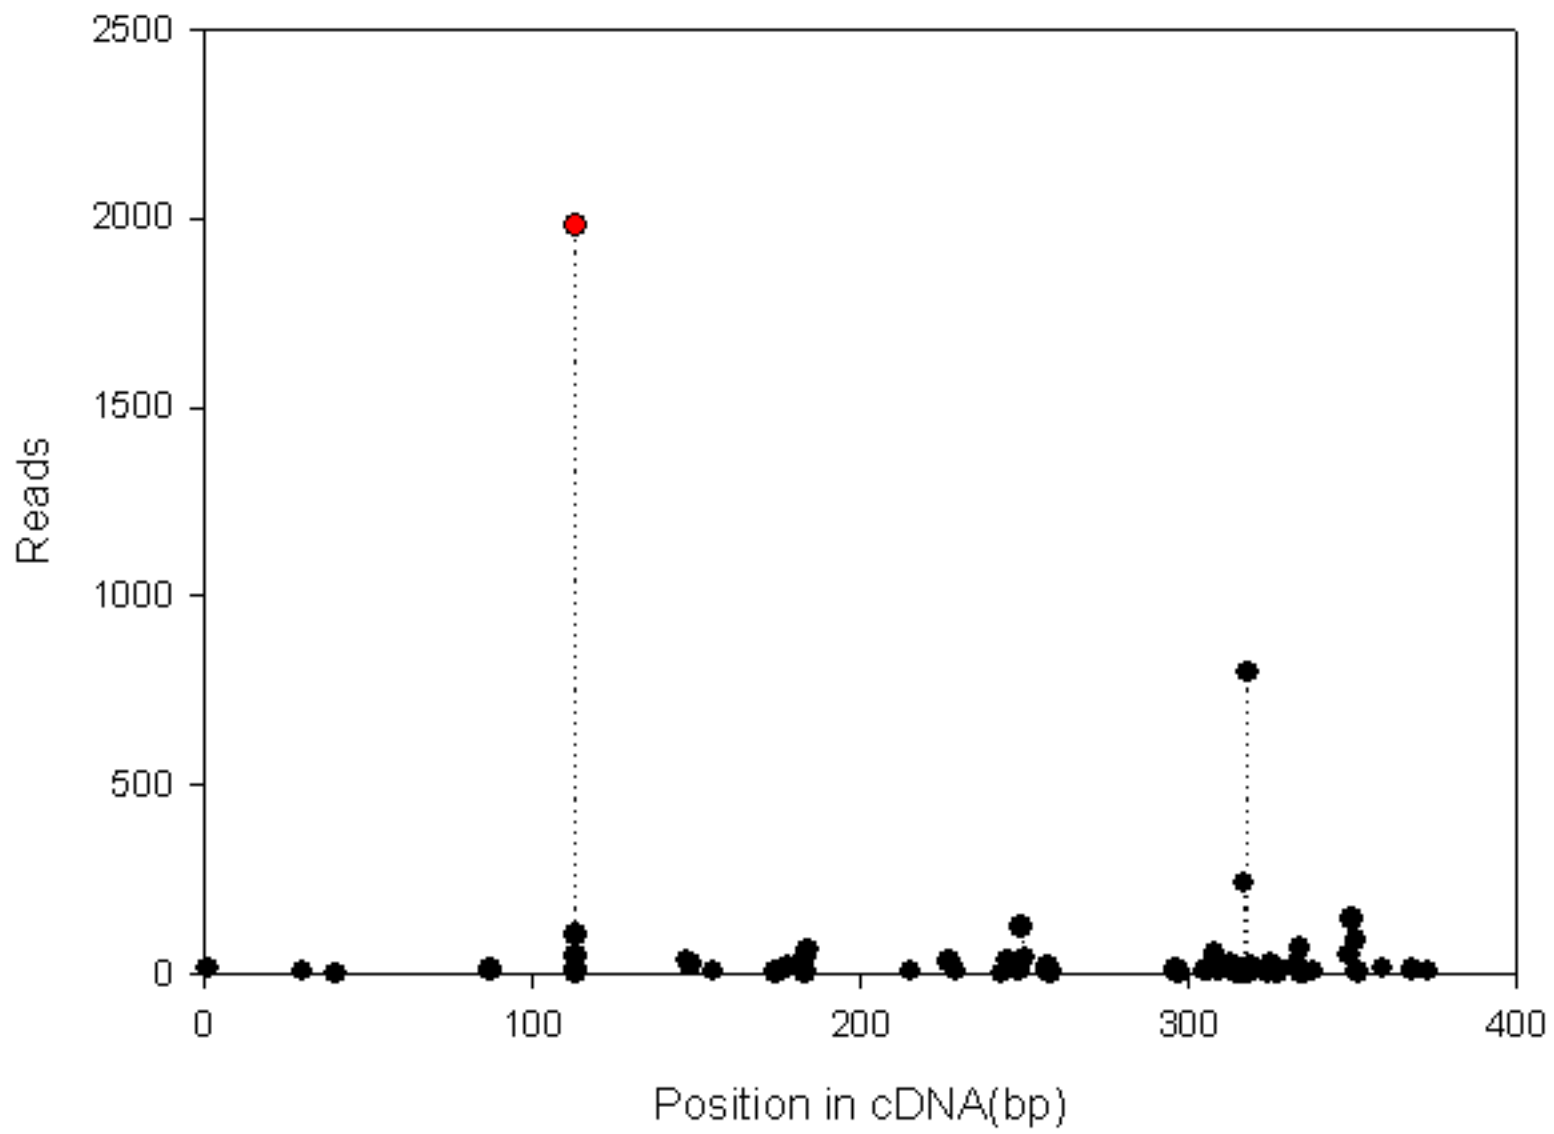

5' UUUUUUUCUCUC-UCUUUAUCUGUGGG 3'  
 ::::::::::: :::::::::::  
 3' --AAAAGAGAGUAGAAUAGAU---- 5'

Orange1.1t05622.1

Csi-miR3951



Csi-miR3951-3p, target=Cs2g03130.1 gene=Cs2g03130

Category=3

Score=5

Cleavage Site=1813

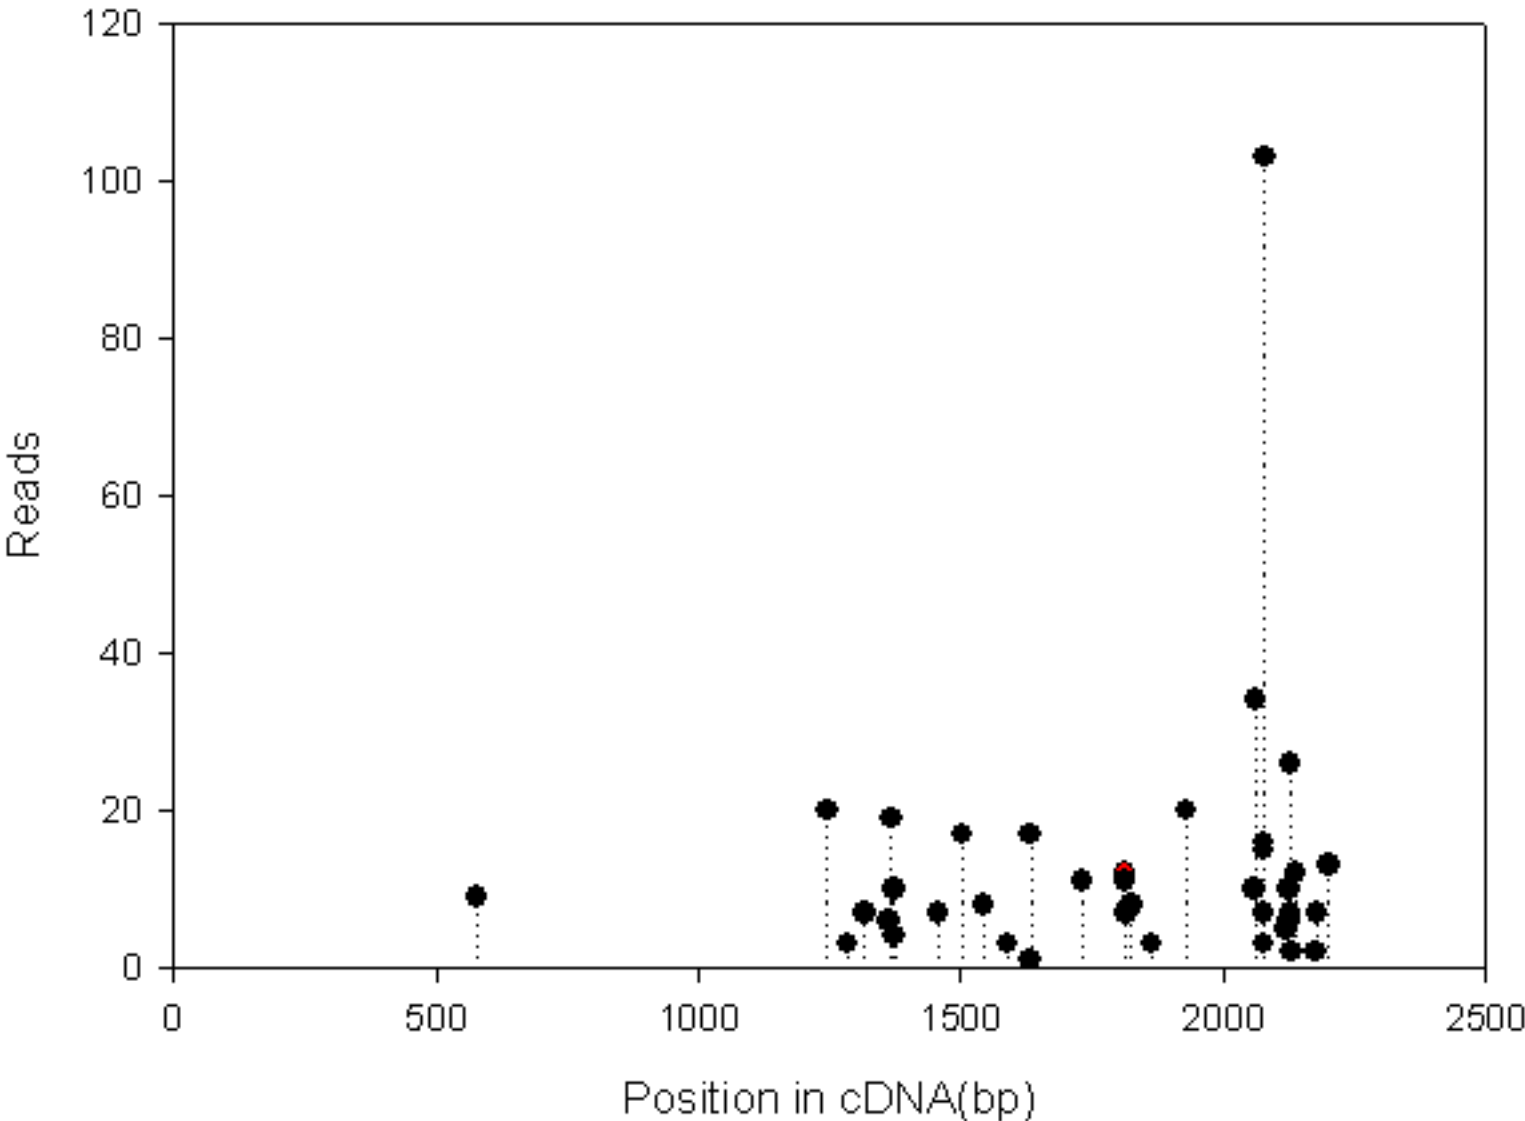

5' AUACAGAUAAUGAUGGGAGGAUCAAC 3'  
 :::::::::::::::::::::  
 3' --UGUCUAUUGCUAUUCUCUUU---- 5'

Cs2g03130.1

Csi-miR3951-3p

Csi-miR3952.1, target=Cs8g13286.1 gene=Cs8g13286  
 Category=2  
 Score=3  
 Cleavage Site=304

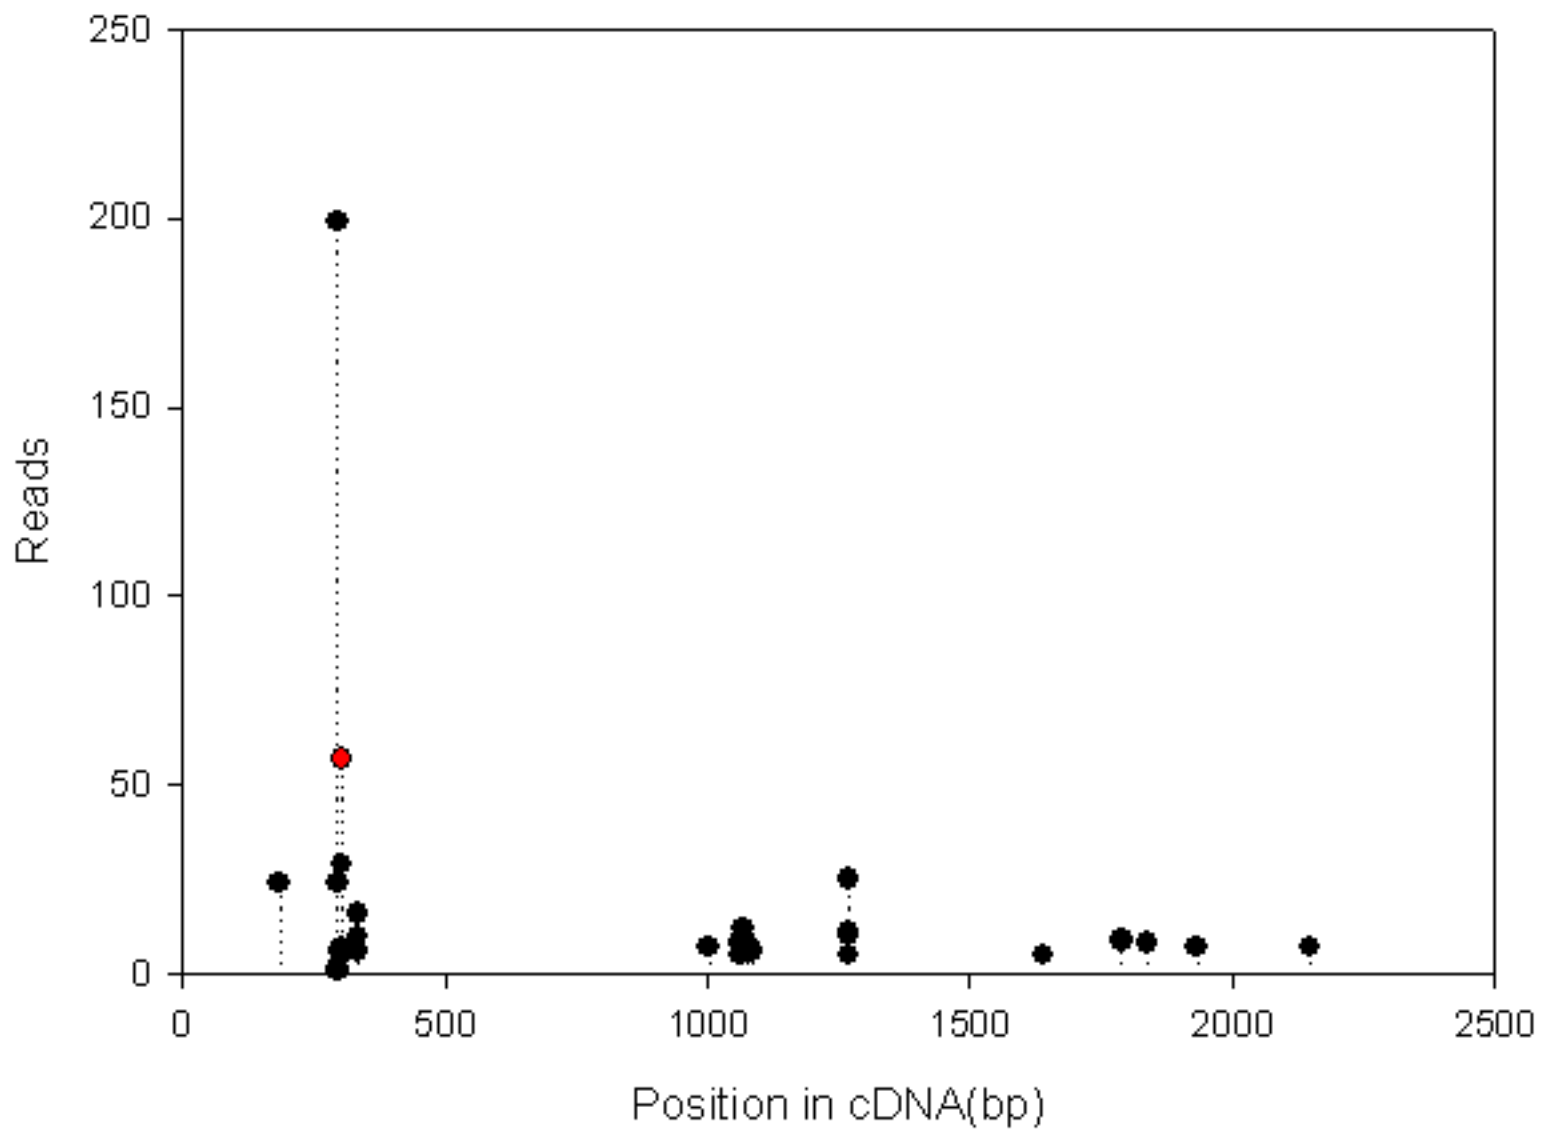

```

5' AGUUGAAGGGCCUUUCUAGAGCACUG 3'      Cs8g13286.1
   :::: :::::::::::::: ::::
3' --AACUCCCCGGAAAGAUGUCGU--- 5'      Csi-miR3952.1

```

Csi-miR3952.2, target=Cs8g13286.1 gene=Cs8g13286  
 Category=2  
 Score=3  
 Cleavage Site=304



```

5' AGUUGAAGGGCCUUUCUAGAGCACUG 3'      Cs8g13286.1
   ::::: ::::::::::::::: :::
3' -CAACUCCCCGGAAAGAUGUCG----- 5'    Csi-miR3952.2
  
```

Csi-miR3952-3p, target=Cs8g13286.1 gene=Cs8g13286  
 Category=3  
 Score=3  
 Cleavage Site=185

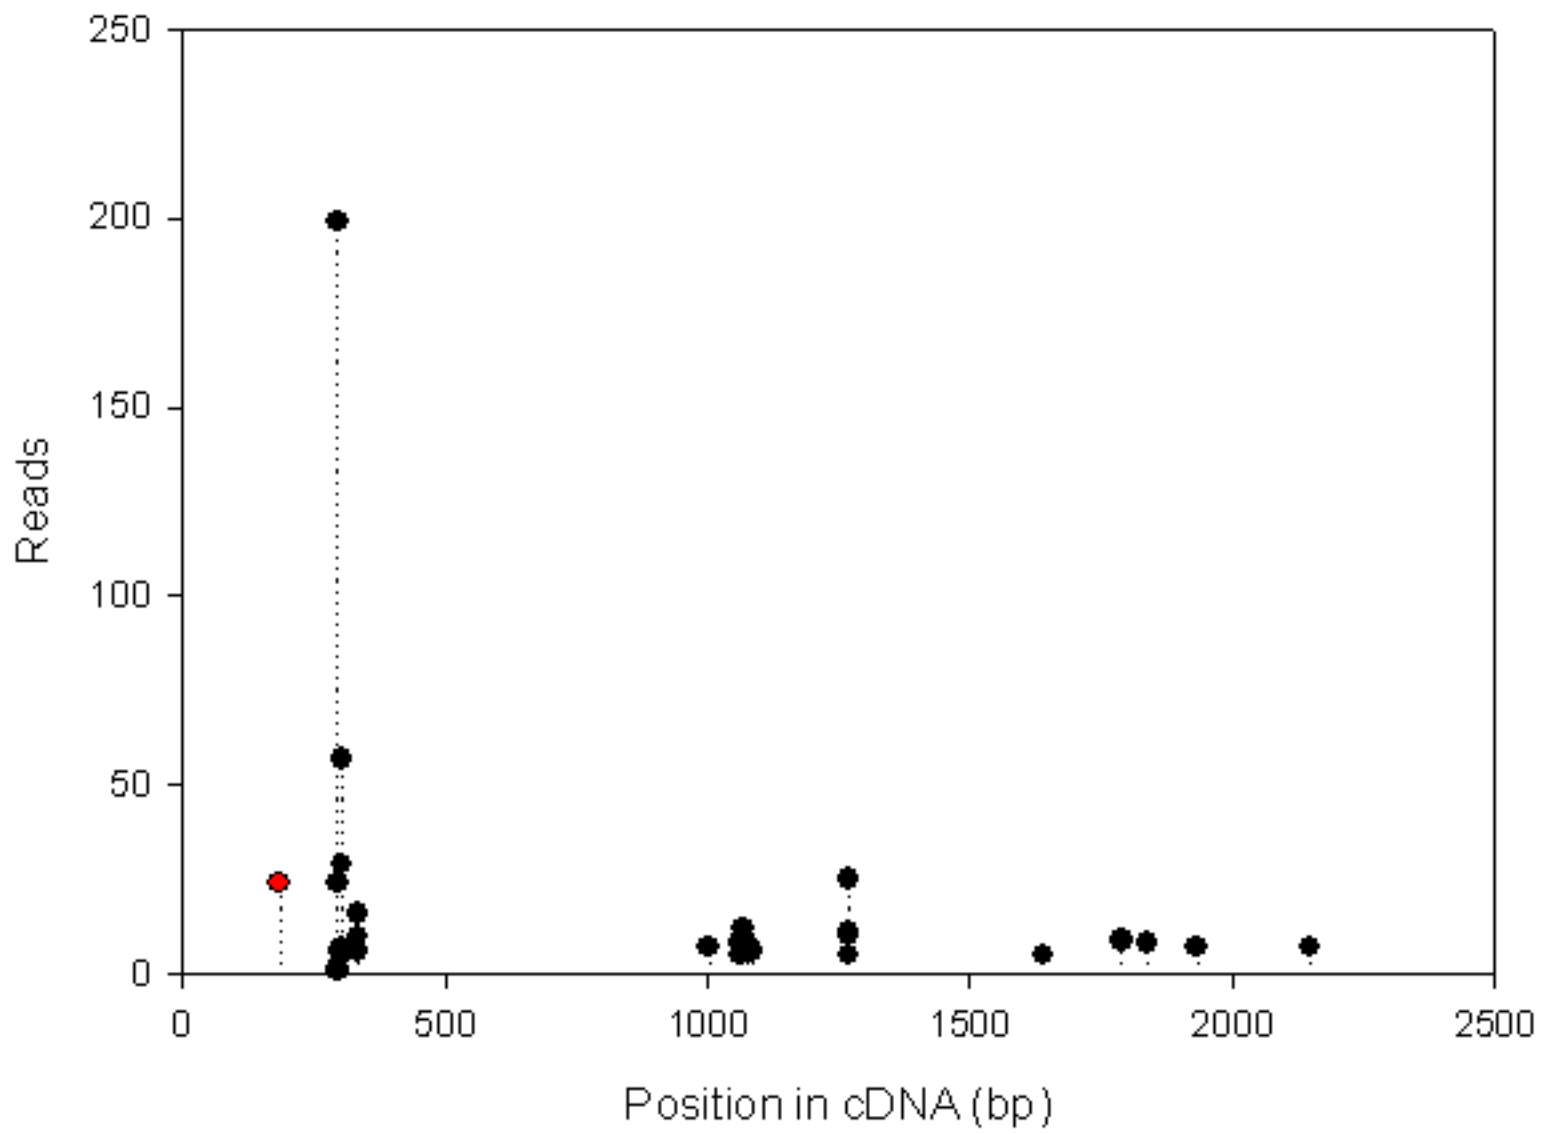

```

5' UGUGCUGUAGAAAGGCCCCUCAACCU 3'      Cs8g13286.1
   ::::: ::::::::::::::: :::
3' -CACGAGAUCUUUCCGGGAAGU----- 5'    Csi-miR3952-3p

```

Csi-miR3954a, target=Cs1g09600.1 gene=Cs1g09600  
 Category=1  
 Score=1  
 Cleavage Site=416

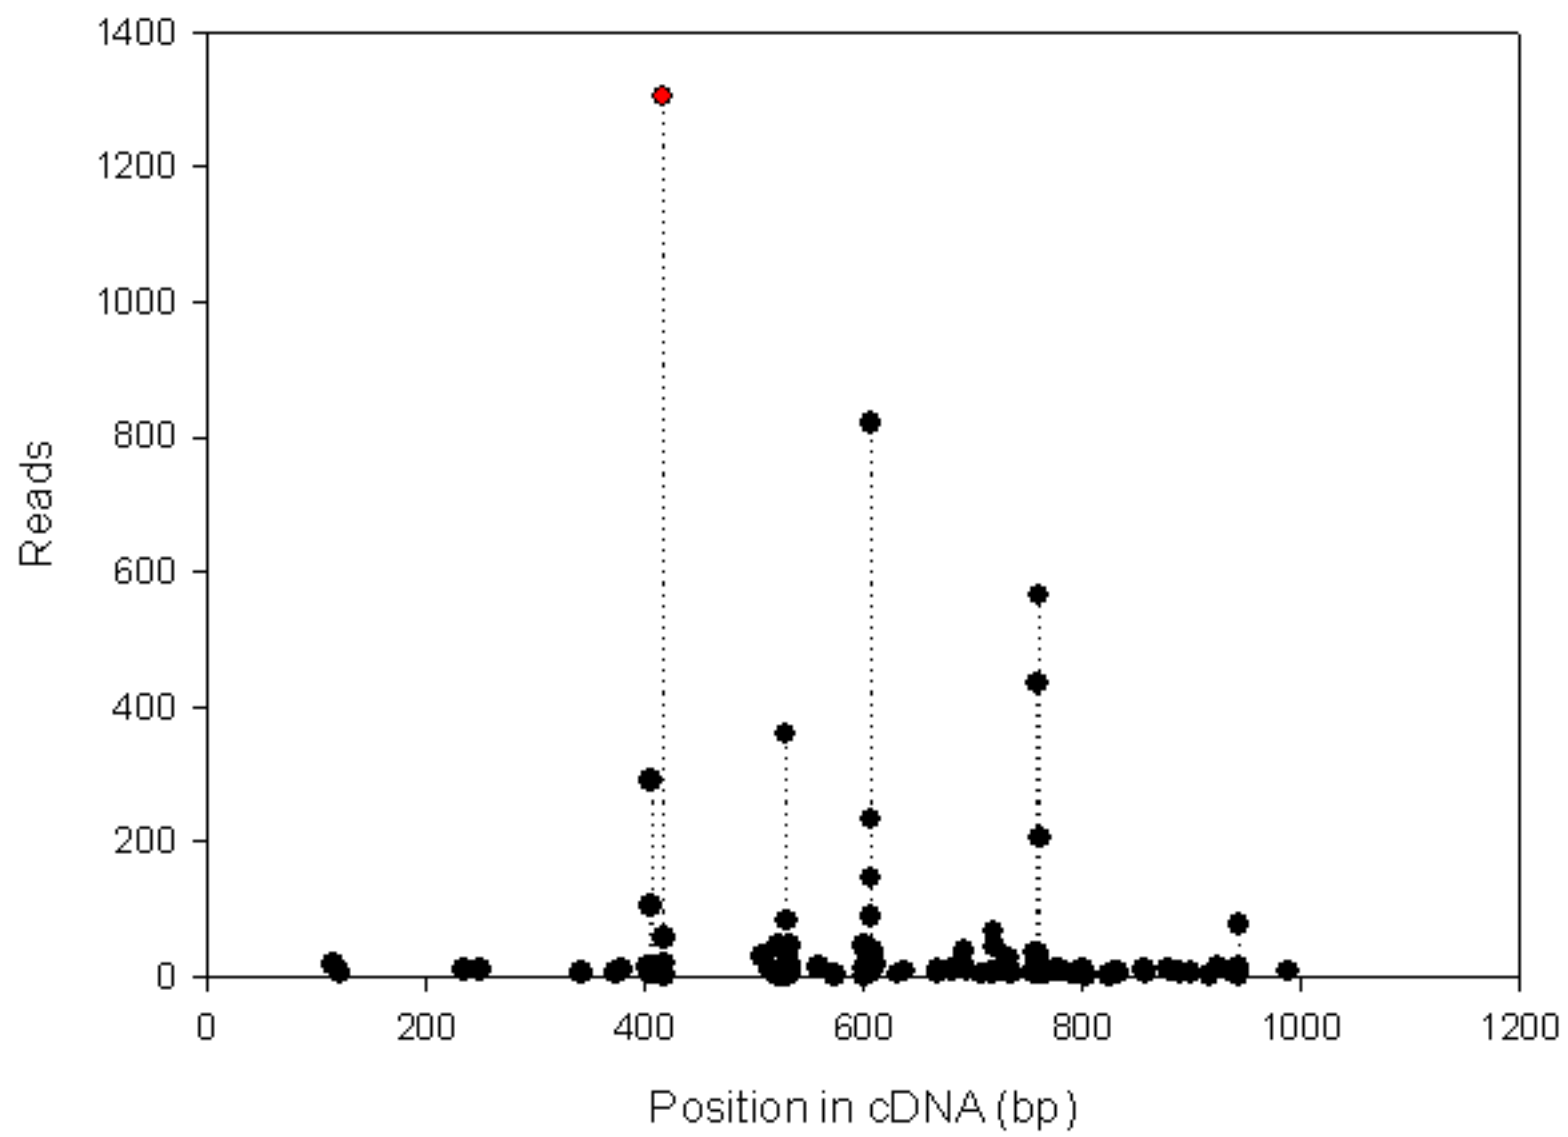

```

5' UGACCCUGAUUUCUCUGUCCAAGCAA 3'      Cs1g09600.1
   ::::: ::::::::::::::::::::
3' ACUGGCACUAAAGAGACAGGUU---- 5'      Csi-miR3954a

```

Csi-miR3954a, target=Cs1g09635.1 gene=Cs1g09635  
 Category:3  
 Score=1  
 Cleavage Site=351

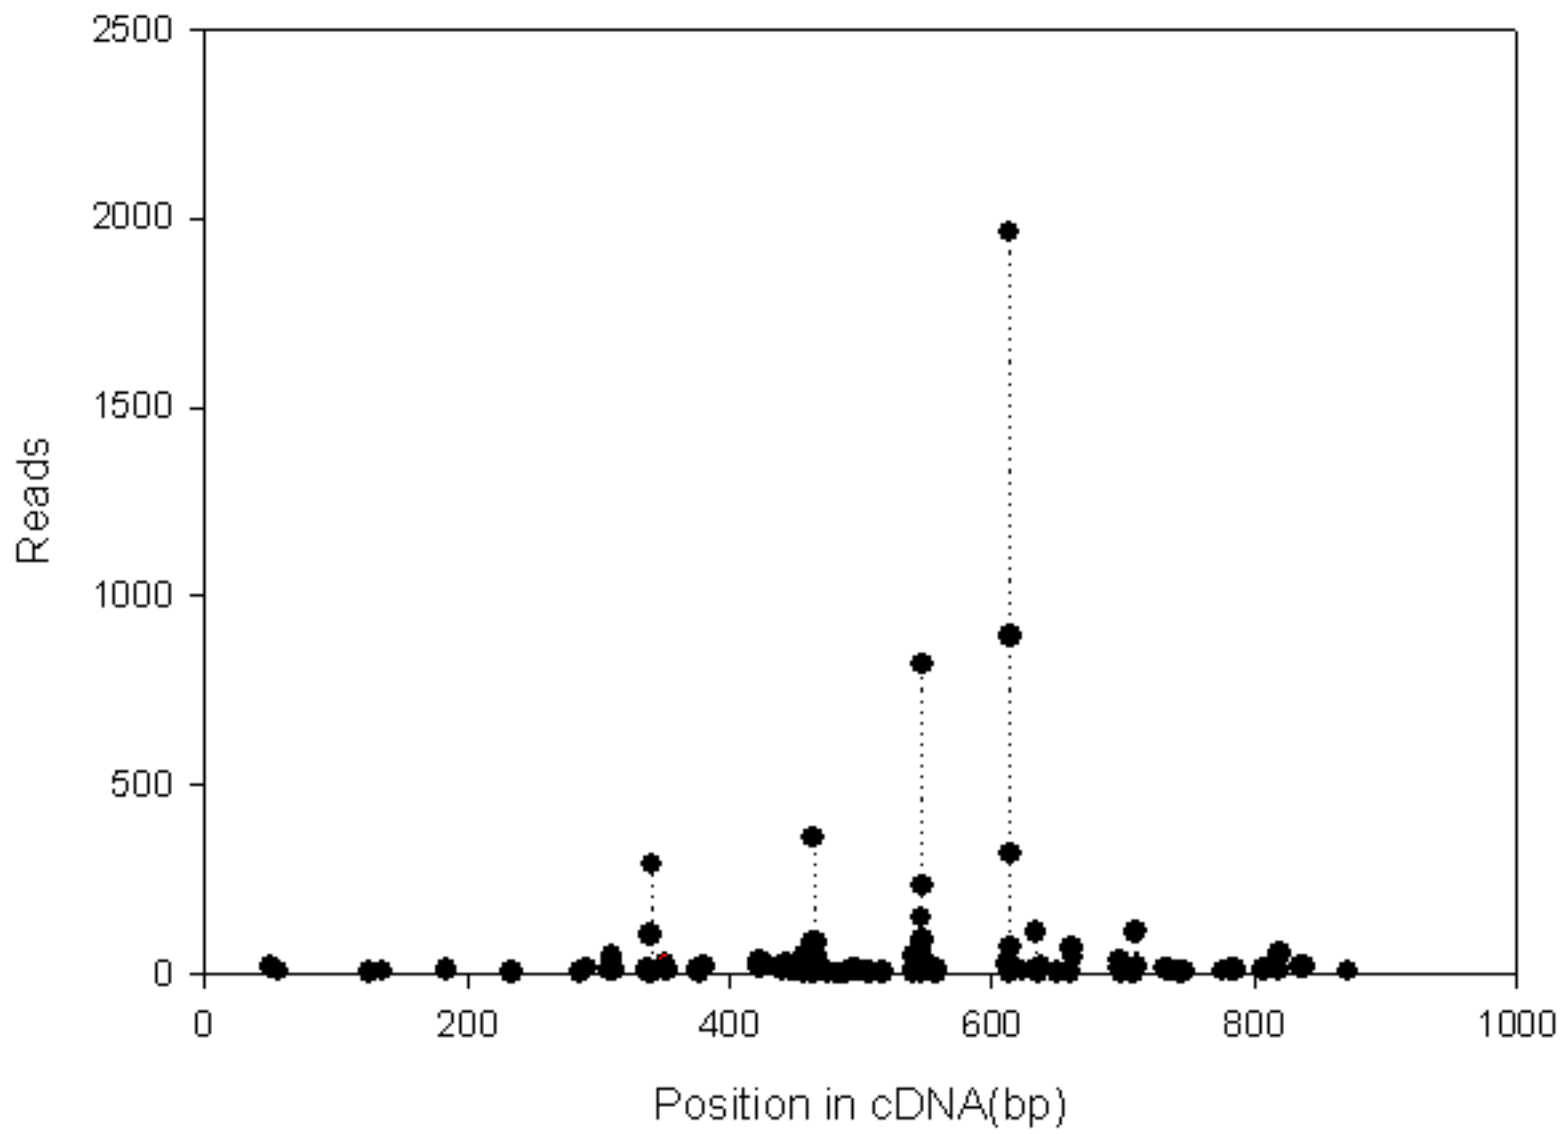

```

5' UGACCCUGAUUUCUCUGUCCAAACAG 3'      Cs1g09635.1
   ::::: ::::::::::::::::::::
3' ACUGGCACUAAAGAGACAGGUU----- 5'    Csi-miR3954a

```

Csi-miR3954a, target=Cs5g04670.1 gene=Cs5g04670  
 Category:3  
 Score=1  
 Cleavage Site=142

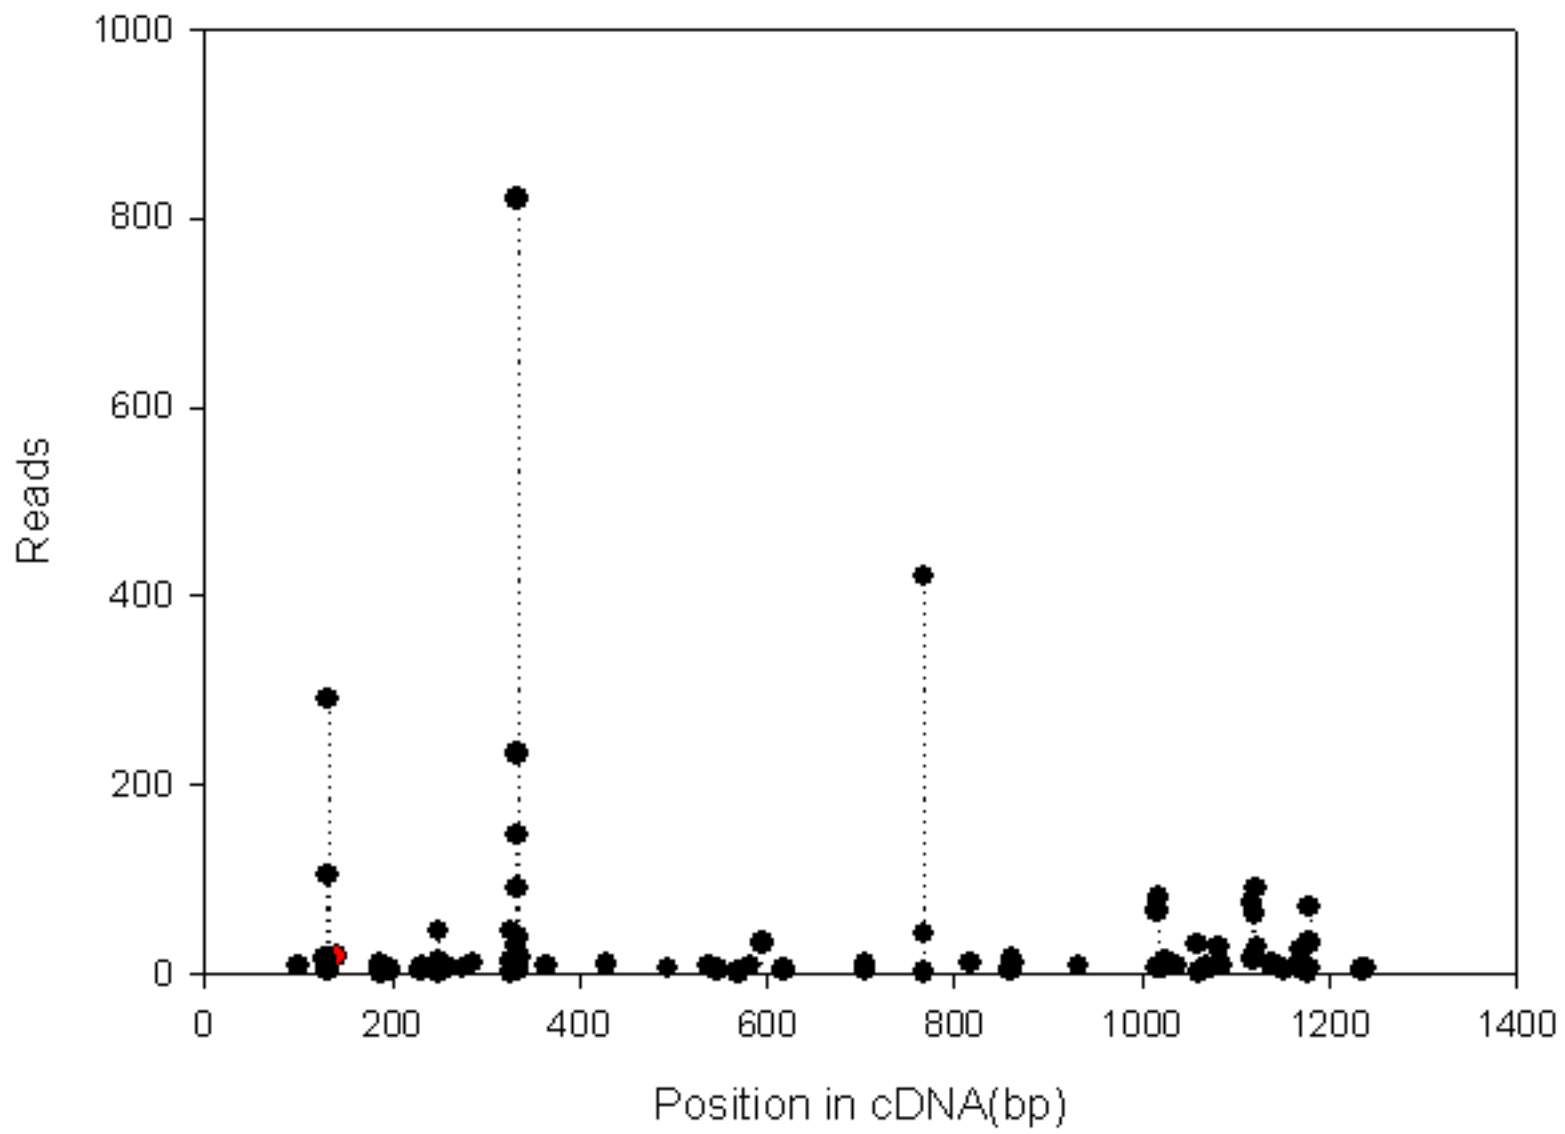

```

5' UGACCCUGAUUUCUCUGUCCAAACAA 3' Cs5g04670.1
   : : : : : : : : : : : : : : : :
3' ACUGGCACUAAAGAGACAGGUU----- 5' Csi-miR3954a

```

Csi-miR3954b, target=Cs1g09600.1 gene=Cs1g09600  
 Category=1  
 Score=1  
 Cleavage Site=416

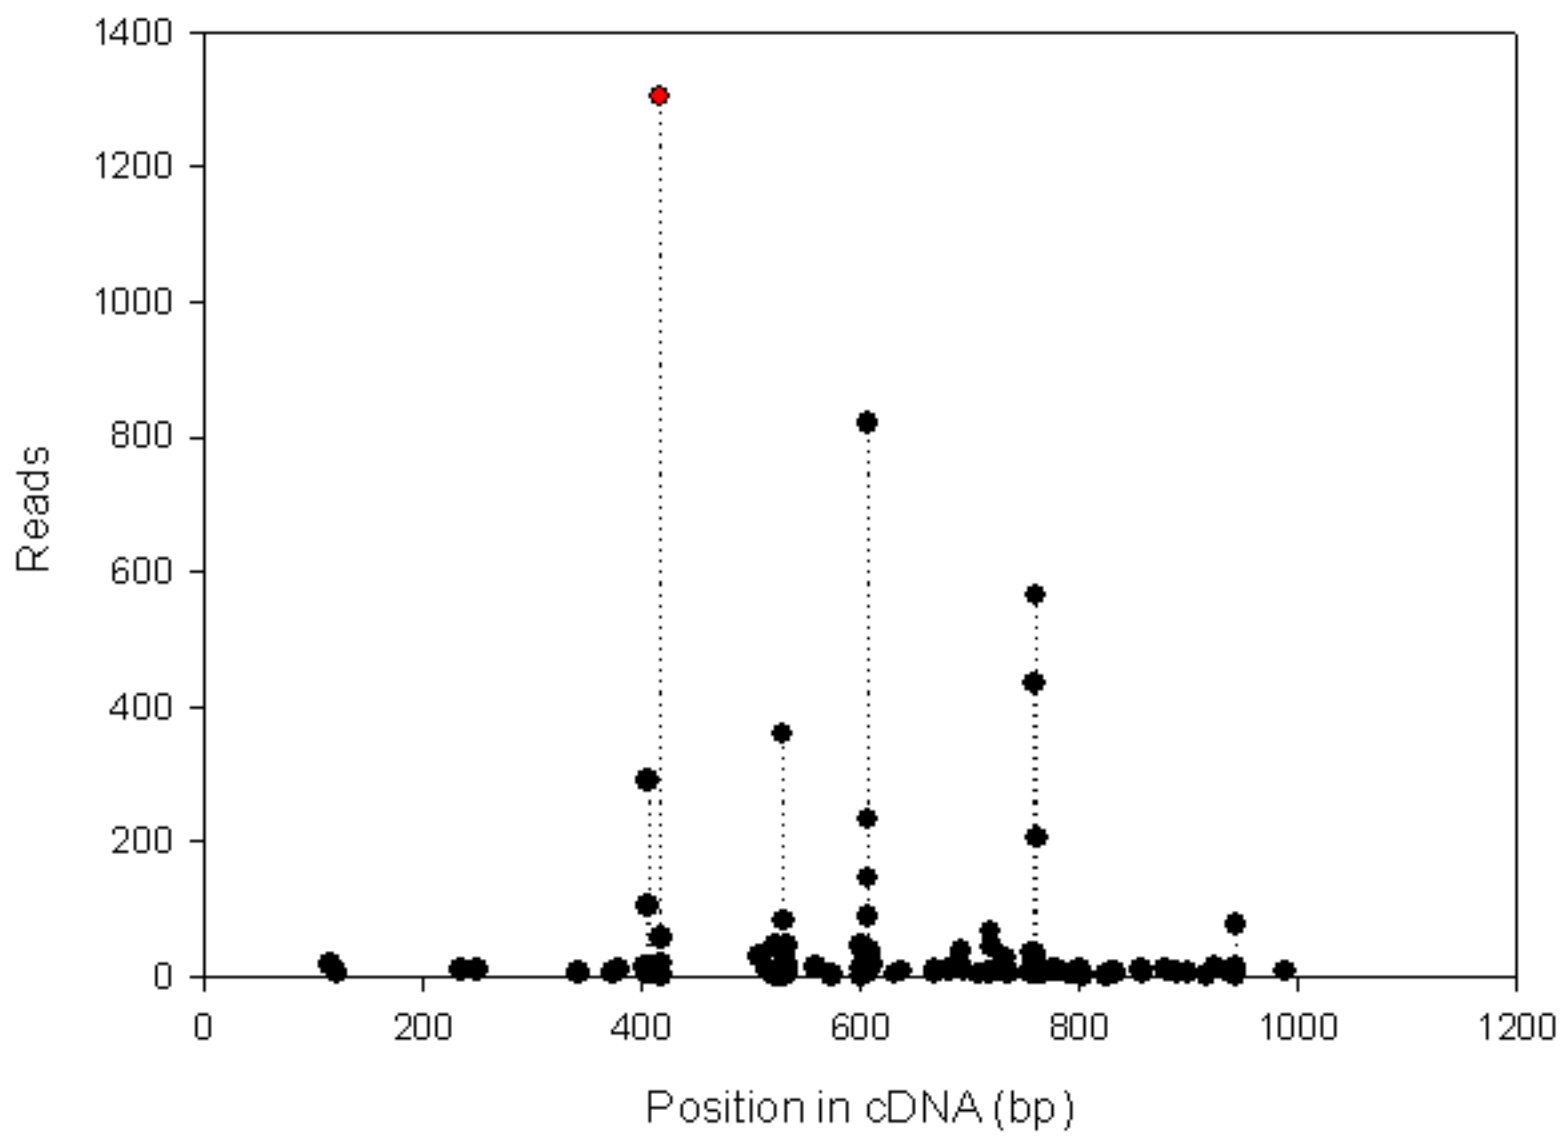

```

5'  UGACCCUGAUUUCUCUGUCCAAGCAA  3'      Cs1g09600.1
      ::::: ::::::::::::::::::::
3'  ACUGGCACUAAAGAGACAGG-----  5'      Csi-miR3954b
  
```



Csi-miR3954b, target=Cs1g09635.1 gene=Cs1g09635  
 Category:3  
 Score=1  
 Cleavage Site=351

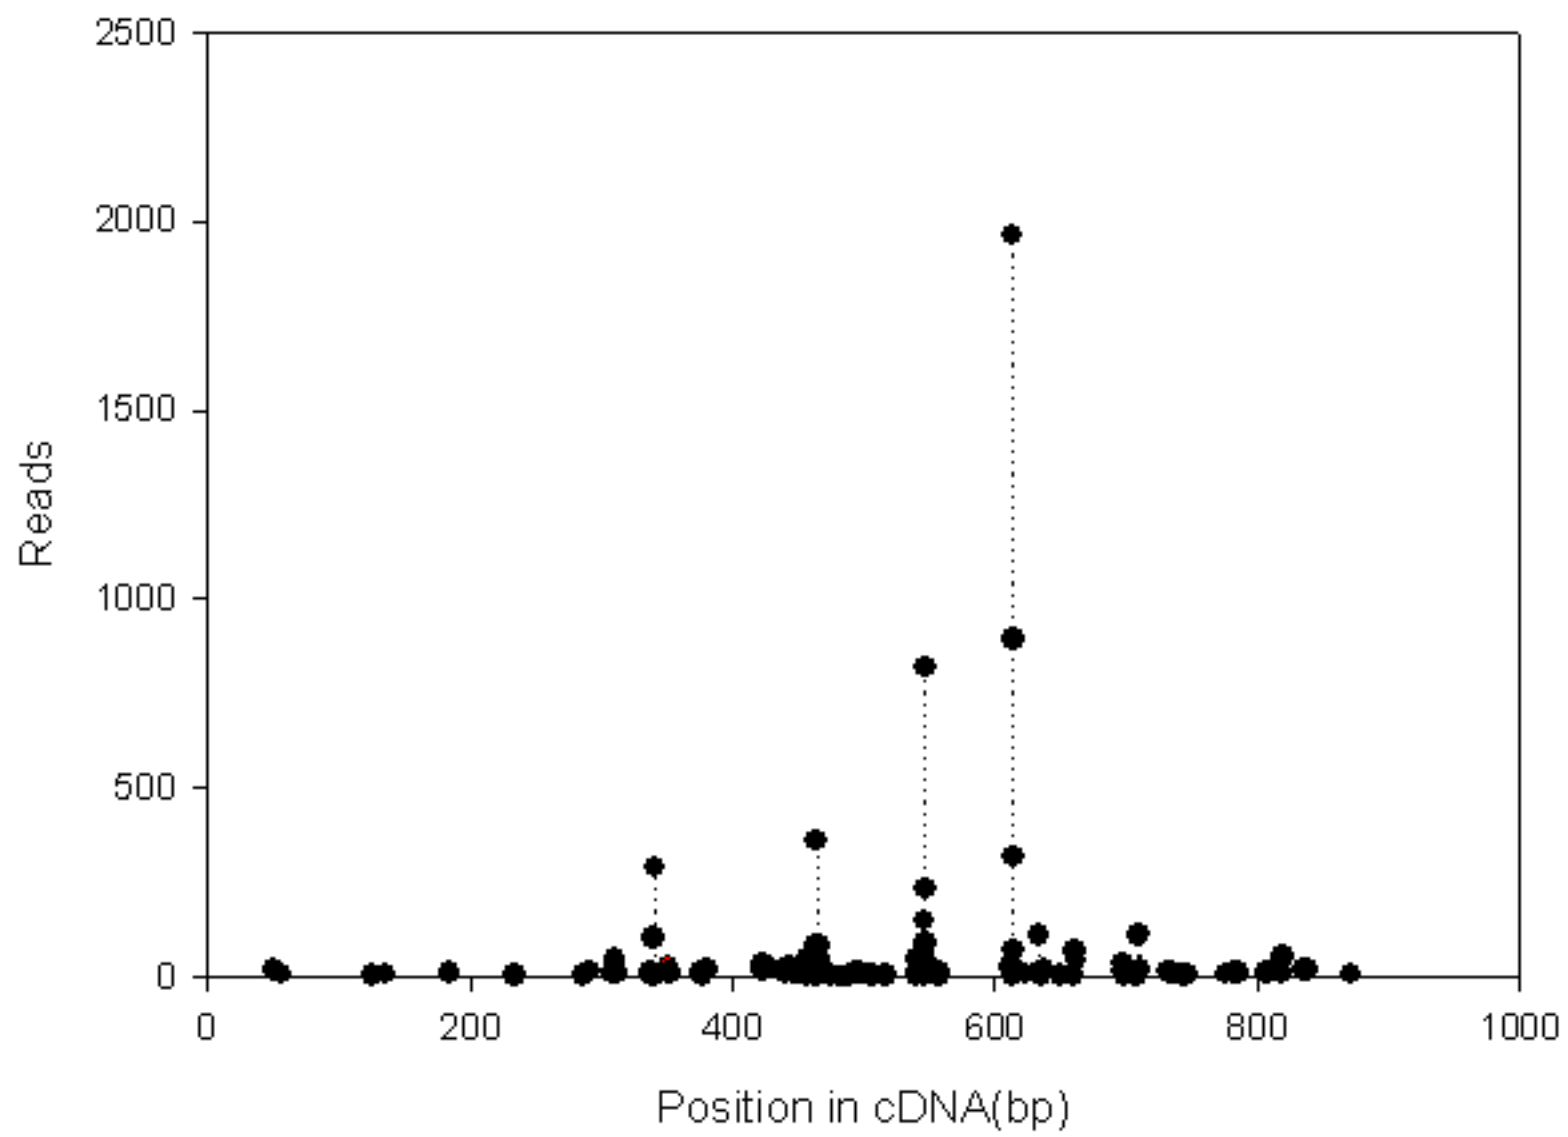

```

5' UGACCCUGAUUUCUCUGUCCAAACAG 3'          Cs1g09635.1
   : : : : : : : : : : : : : : : :
3' ACUGGCACUAAAGAGACAGG----- 5'        Csi-miR3954b

```

Csi-miR3954b, target=Cs2g29120.1 gene=Cs2g29120

Category:1

Score=4.5

Cleavage Site=942

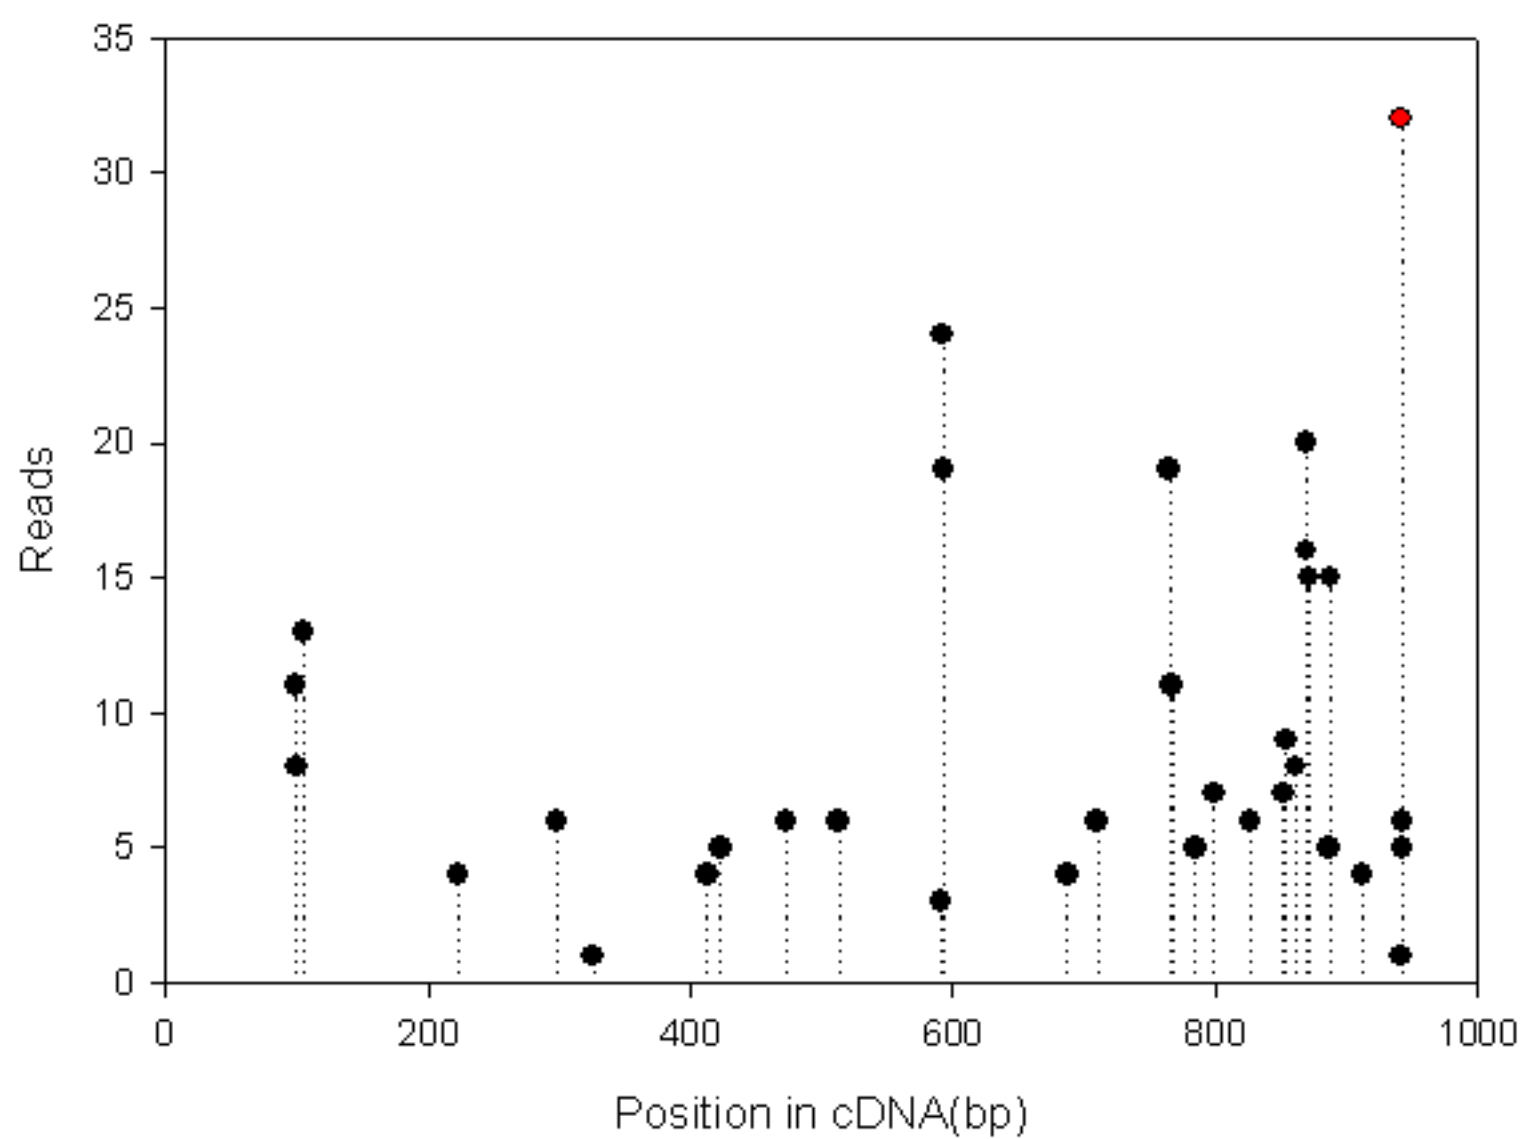

5' UAAGGACUGUGAUUACUCUGUCAAC 3'

Cs2g29120.1

.....

3' ---ACUGGCACUAAAGAGACAGG--- 5'

Csi-miR3954b

Csi-miR3954b, target=Cs5g04670.1 gene=Cs5g04670  
 Category:3  
 Score=1  
 Cleavage Site=142

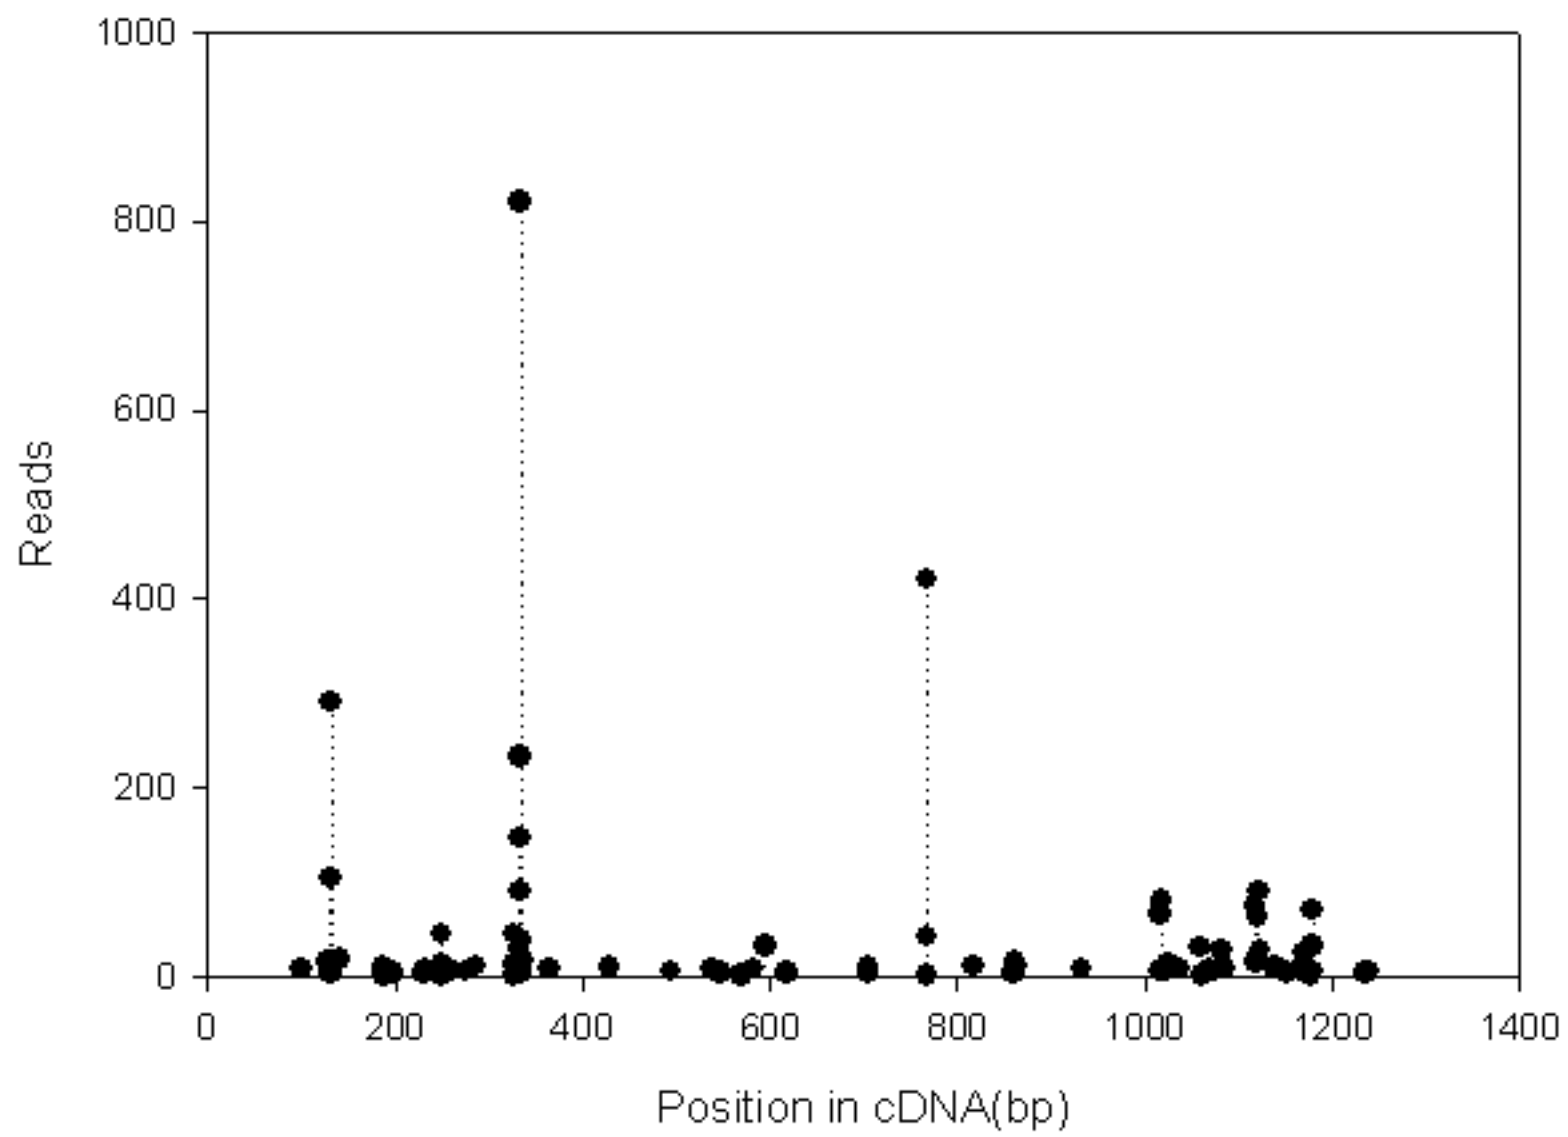

```

5'  UGACCCUGAUUUCUCUGUCCAAACAA  3'          Cs5g04670.1
    ::::: ::::::::::::::::::::
3'  ACUGGCACUAAAGAGACAGG-----  5'          Csi-miR3954b
  
```

Csi-miR396a, target=Cs1g22520.1 gene=Cs1g22520  
 Category:1  
 Score=4  
 Cleavage Site=226

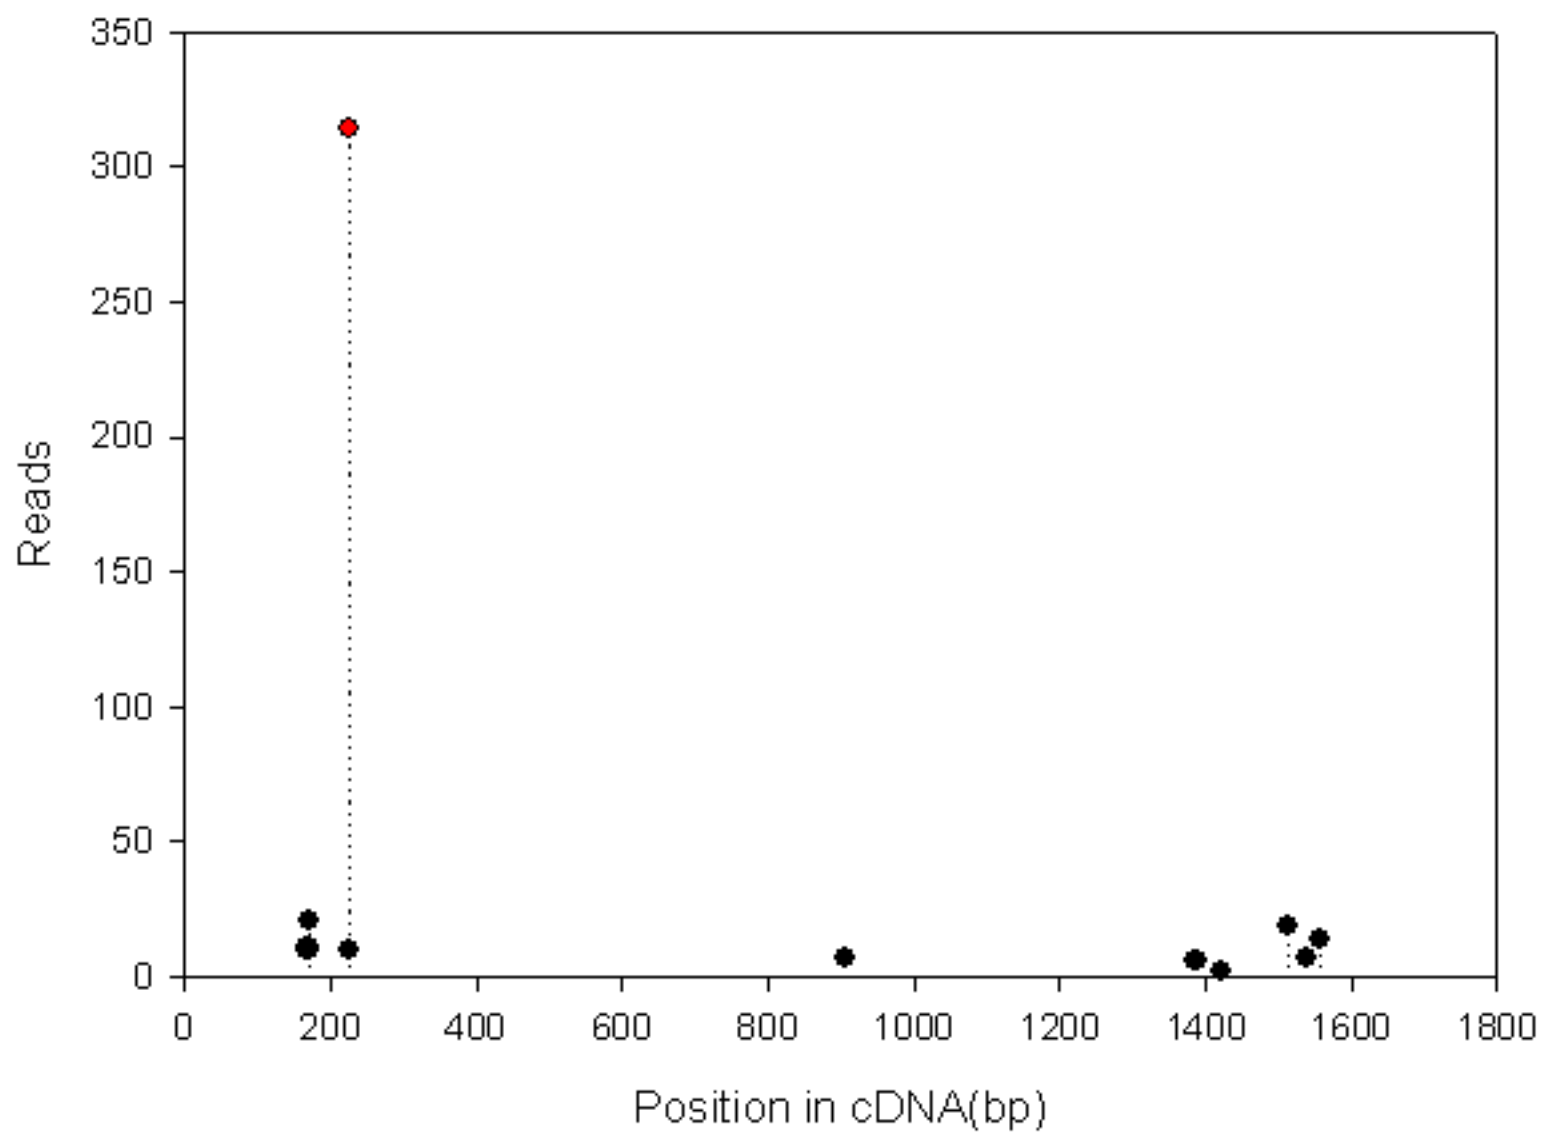

```

5' GAAGUUCAAGAAAUCUGUGGGAAGAA 3'      Cs1g22520.1
   :::::::::::::: ::::::::::::::
3' -GUCAAGUUCUUUCGACACCUU----- 5'    Csi-miR396a
  
```

Csi-miR396a, target=Cs3g23180.1 gene=Cs3g23180  
 Category:3  
 Score=4  
 Cleavage Site=625

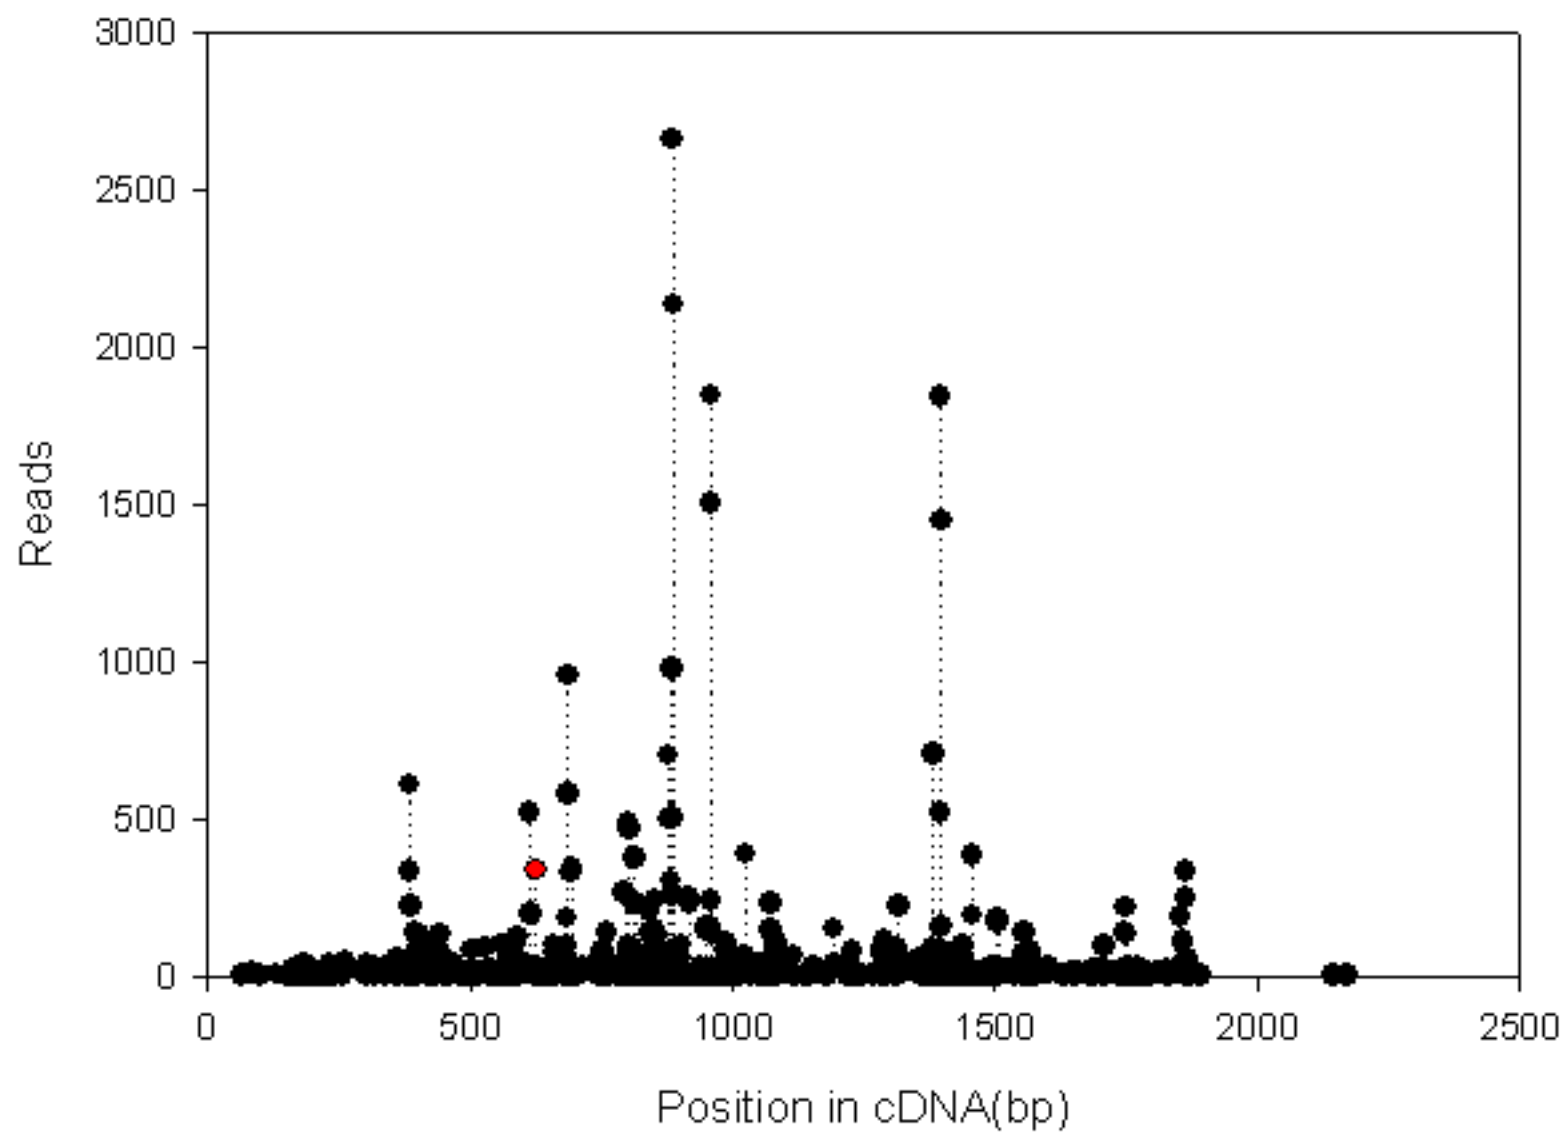

```

5' AAAGAUCAAGGAAGCUGUGGGAGUUG 3' Cs3g23180.1
   :: ::::::::::::::::::::
3' -GUCAAGUUCUUUCGACACCUU---- 5' Csi-miR396a
  
```

Csi-miR396a, target=Cs5g09850.1 gene=Cs5g09850  
 Category:2  
 Score=4  
 Cleavage Site=767

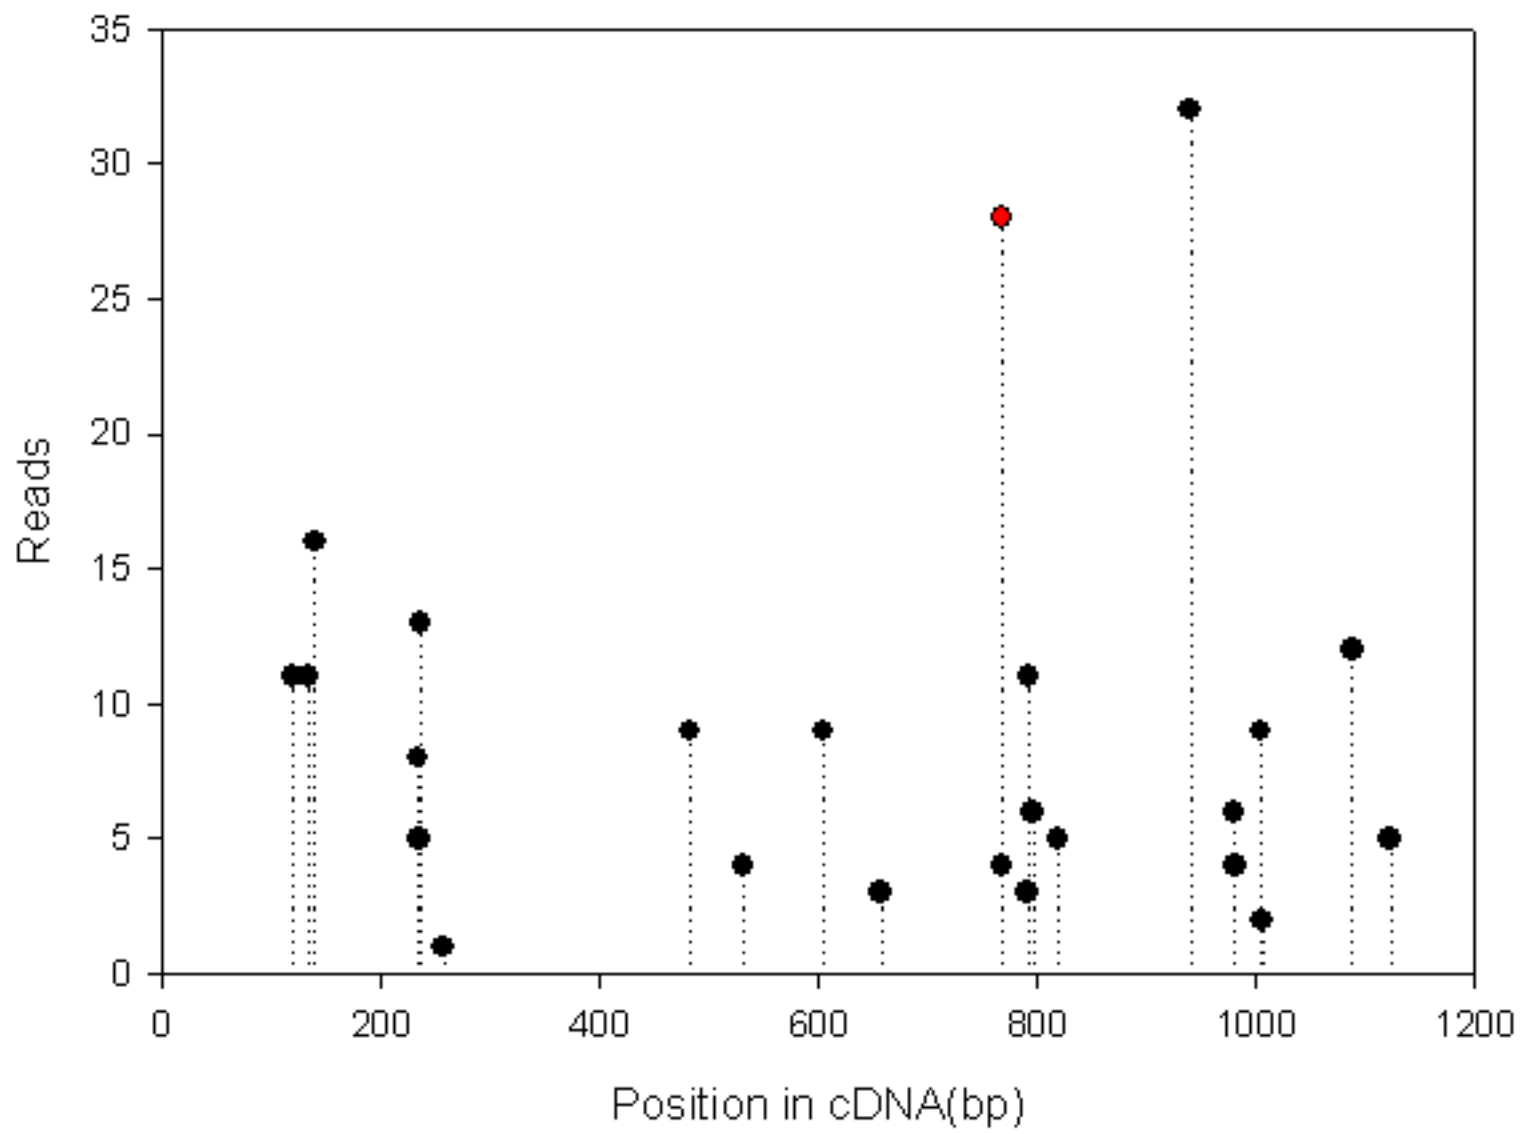

```

5' UGCGUUCAAGAAAGCUUGUGGAAGCU 3'      Cs5g09850.1
   ::::::::::::::: ::::::::::::
3' -GUCAAGUUCUUUCG-ACACCUU--- 5'      Csi-miR396a
  
```

Csi-miR396a, target=Cs6g15330.1 gene=Cs6g15330  
 Category: 1  
 Score=3  
 Cleavage Site=449

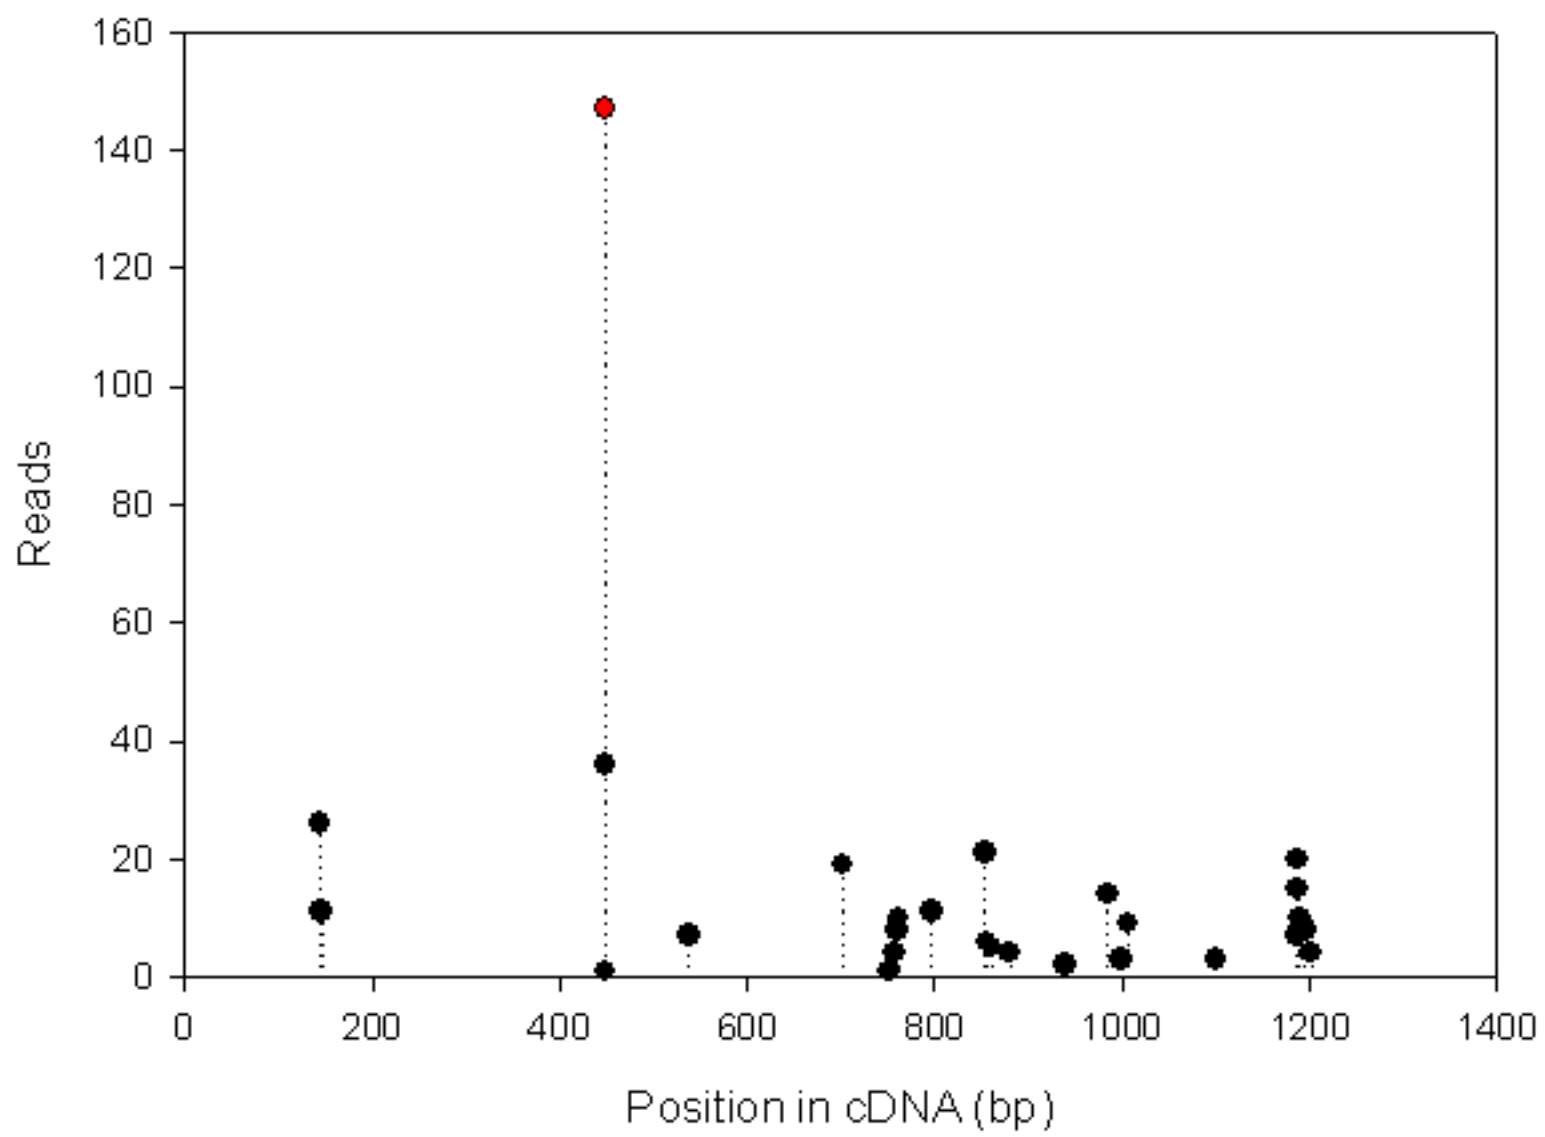

```

5' ACCGUUCAAGAAAGCAUGUGGAAAUC 3'      Cs6g15330.1
   : : : : : : : : : : : : : : : :
3' -GUCAAGUUCUUUCG-ACACCUU--- 5'      Csi-miR396a
  
```

Csi-miR396a, target=Cs7g15220.1 gene=Cs7g15220  
 Category=1  
 Score=3  
 Cleavage Site=377

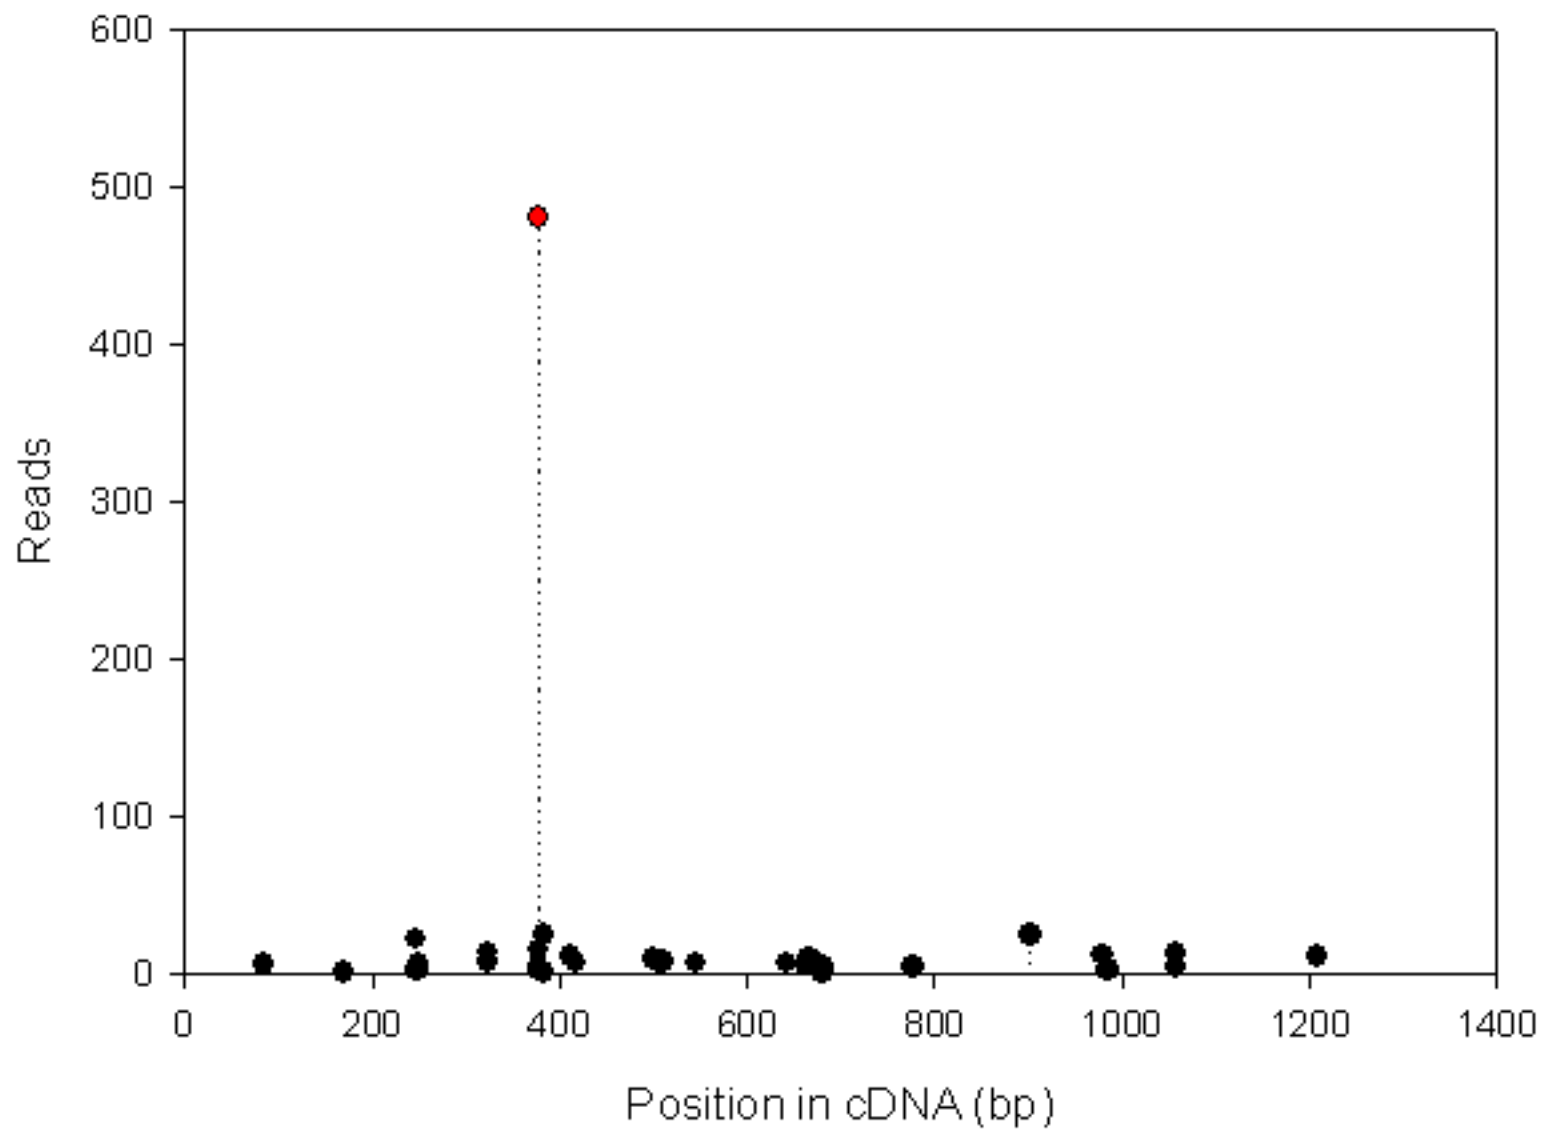

```

5' ACCGUUCAAGAAAGCCUGUGGAAUCA 3'      Cs7g15220.1
   : : : : : : : : : : : : : : : :
3' -GUCAAGUUCUUUC-GACACCUU--- 5'      Csi-miR396a
  
```



Csi-miR396a, target=Orange1.1t03122.1 gene=Orange1.1t03122  
Category=1  
Score=3  
Cleavage Site=583

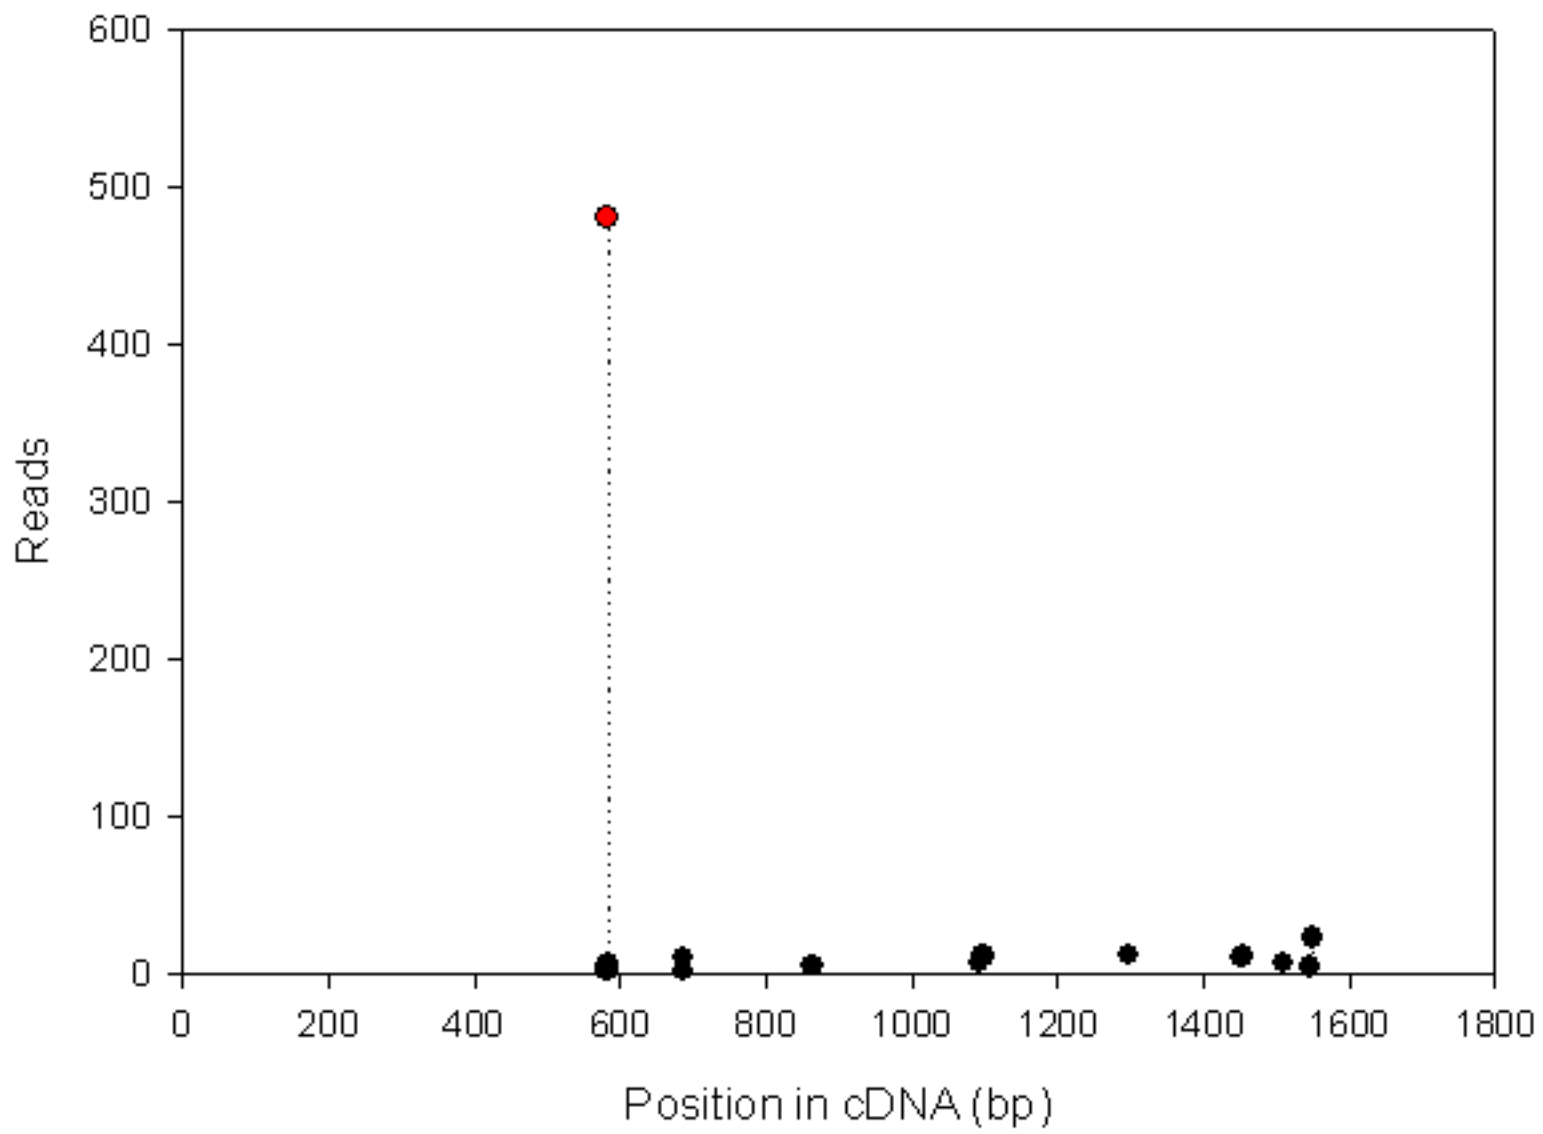

```
5' ACCGUUCAAGAAAGCCUGUGGAAUCA 3'      Orange1.1t03122.1
   : : : : : : : : : : : : : : : :
3' -GUCAAGUUCUUUC-GACACCUU--- 5'      Csi-miR396a
```

Csi-miR396b.1, target=Cs1g22520.1 gene=Cs1g22520  
Category:1  
Score=3  
Cleavage Site=226



```
5' GAAGUUCAAGAAAUCUGUGGGAAGAA 3'      Cs1g22520.1
   :::::::::::::: ::::::::::::::
3' ---CAAGUUCUUUCGACACCUU--- 5'      Csi-miR396b.1
```

Csi-miR396b.1, target=Cs3g23180.1 gene=Cs3g23180  
 Category:3  
 Score=3  
 Cleavage Site=625

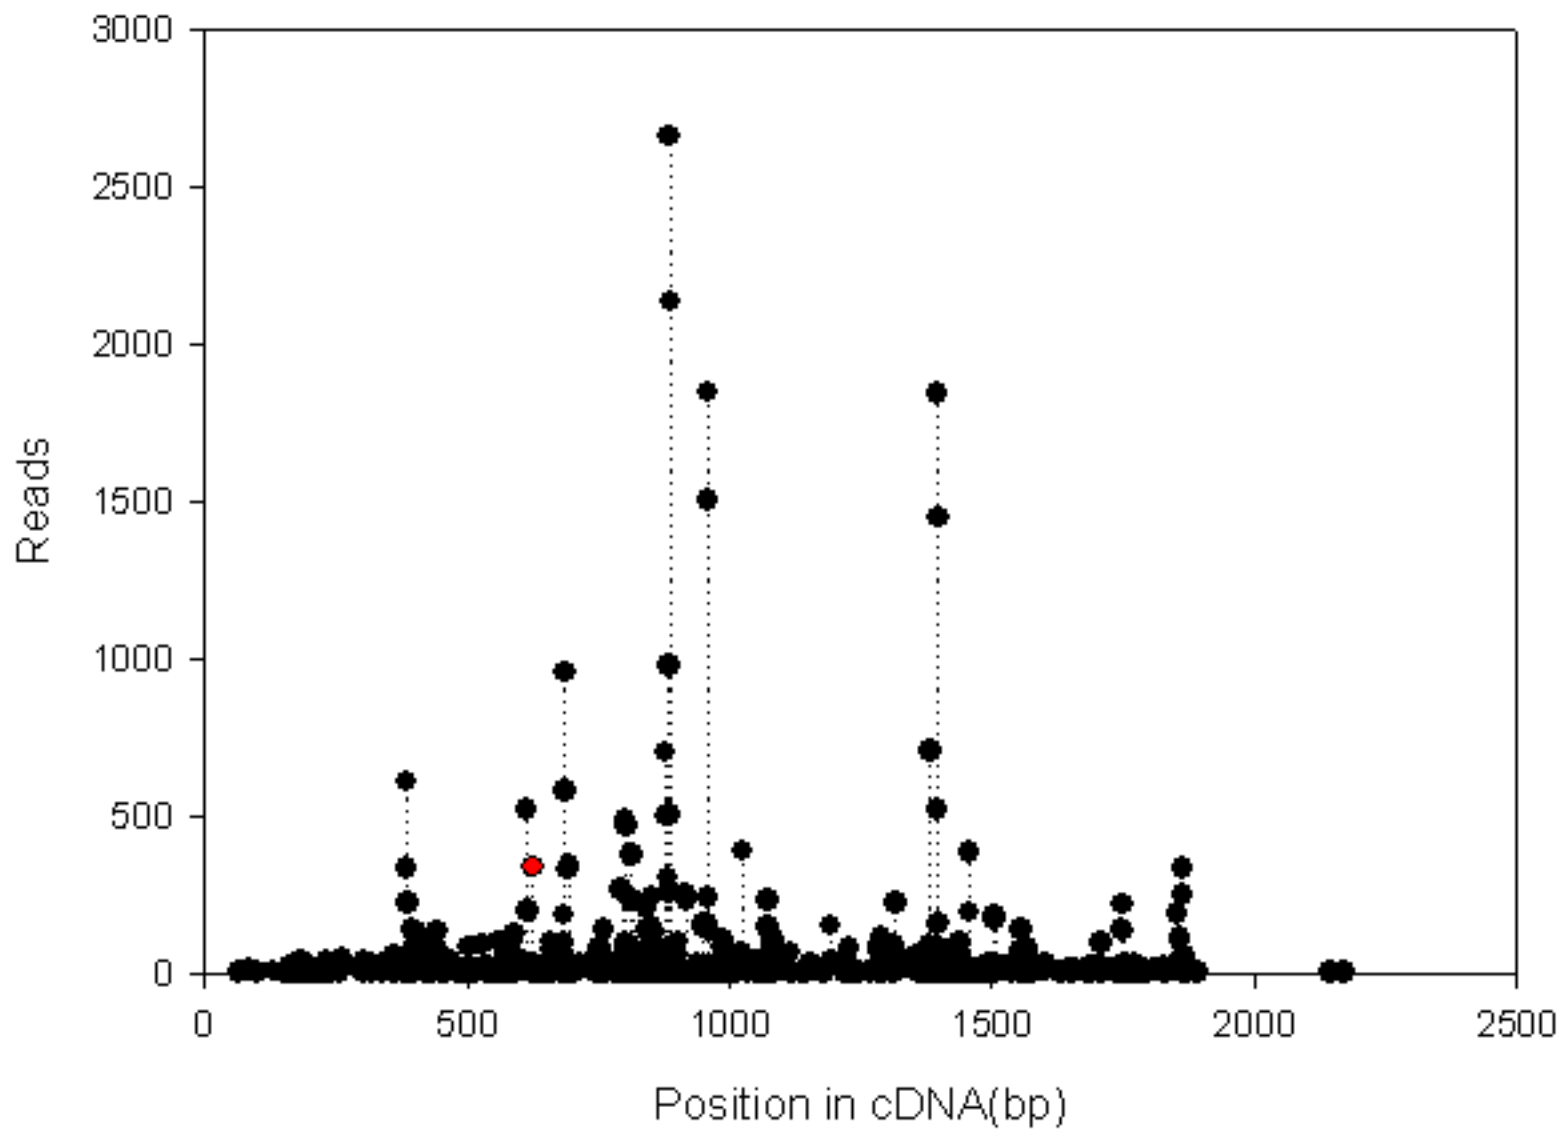

```

5' AAAGAUCAAGGAAGCUGUGGGAGUUG 3' Cs3g23180.1
   : : : : : : : : : : : : : : : :
3' ---CAAGUUCUUUCGACACCUU---- 5' Csi-miR396b.1
  
```

Csi-miR396b.1, target=Cs5g09850.1 gene=Cs5g09850  
 Category:2  
 Score=2  
 Cleavage Site=767



5' UGCGUUCAAGAAAGCUUGUGGAAGCU 3'

Cs5g09850.1

.....

3' ---CAAGUUCUUUCG-ACACCUU--- 5'

Csi-miR396b.1

Csi-miR396b.1, target=Cs6g15330.1 gene=Cs6g15330  
 Category: 1  
 Score=2  
 Cleavage Site=449

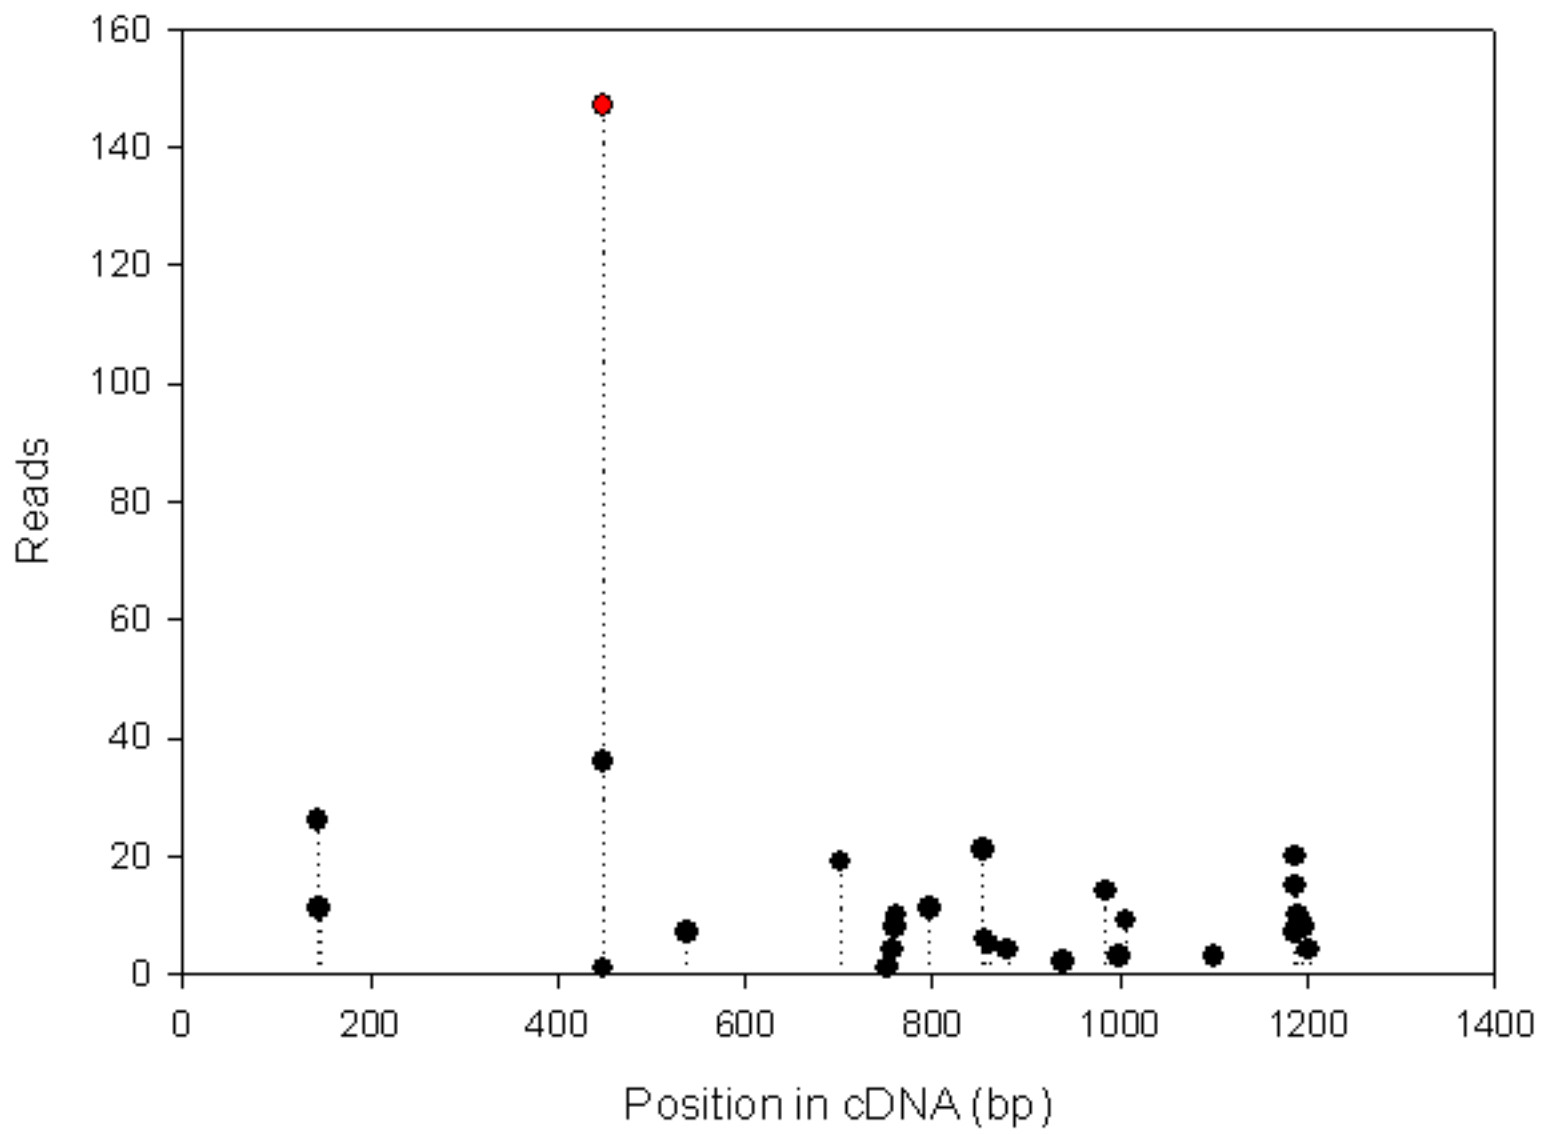

5' ACCGUUCAAGAAAGCAUGUGGAAAUC 3'  
 :::::::::::::: :::::::  
 3' ---CAAGUUCUUUCG-ACACCUU--- 5'

Cs6g15330.1

Csi-miR396b.1

Csi-miR396b.1, target=Cs7g15220.1 gene=Cs7g15220  
 Category=1  
 Score=2  
 Cleavage Site=377

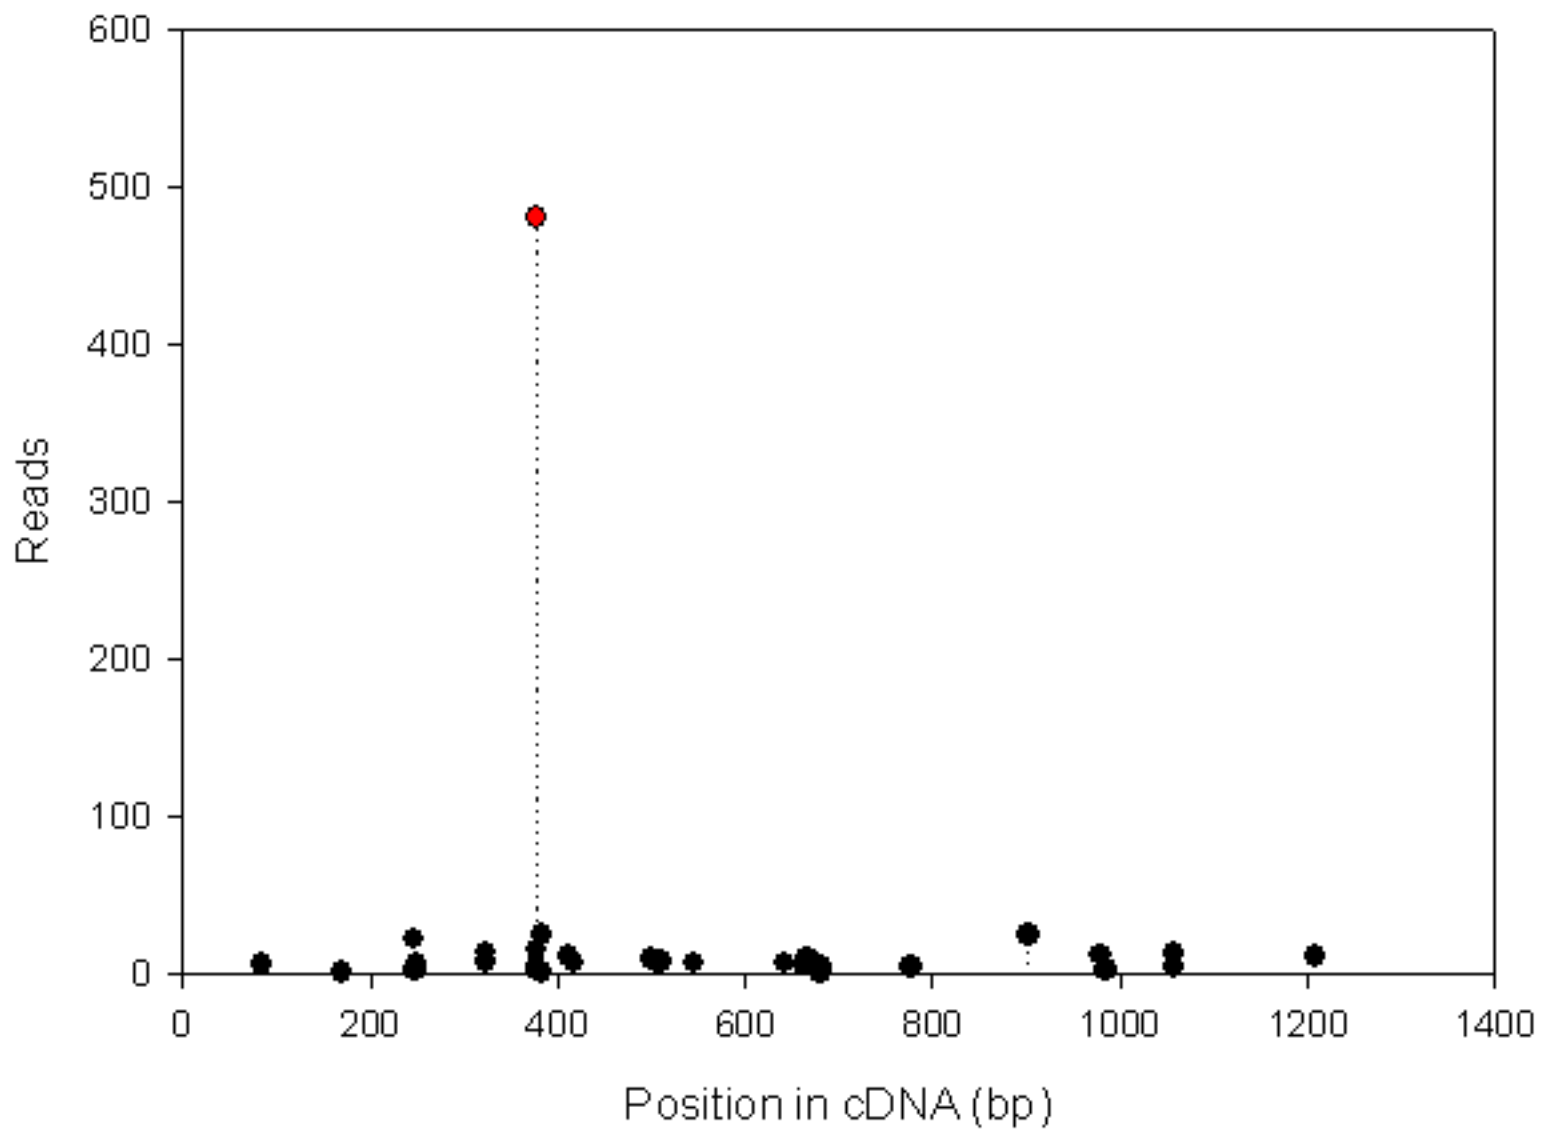

```

5' ACCGUUCAAGAAAGCCUGUGGAAUCA 3'      Cs7g15220.1
   :::::::::::::: ::::::::::::::
3' ---CAAGUUCUUUC-GACACCUU--- 5'      Csi-miR396b.1
  
```

Csi-miR396b.1, target=Orange1.1t03122.1 gene=Orange1.1t03122  
 Category=1  
 Score=2  
 Cleavage Site=583

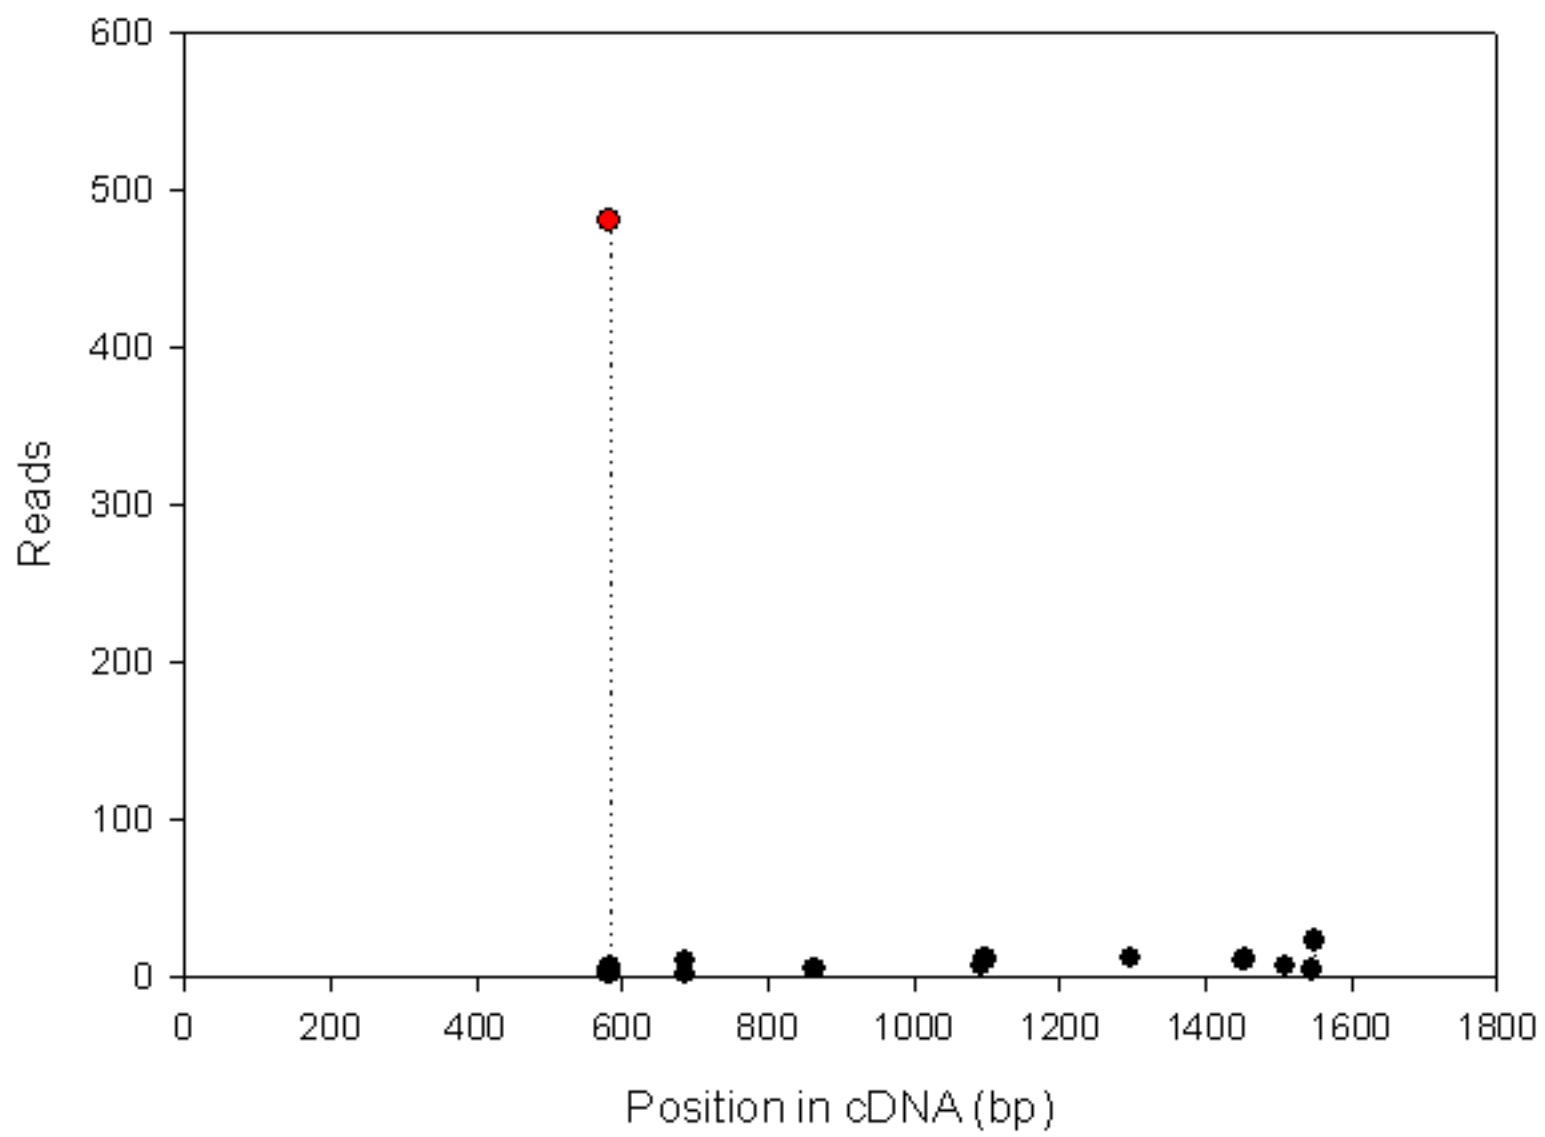

```

5' ACCGUUCAAGAAAGCCUGUGGAAUCA 3'      Orange1.1t03122.1
   : : : : : : : : : : : : : : : :
3' ---CAAGUUCUUUC-GACACCUU--- 5'      Csi-miR396b.1
  
```

Csi-miR396b.2, target=Cs1g22520.1 gene=Cs1g22520  
 Category:1  
 Score=3  
 Cleavage Site=226

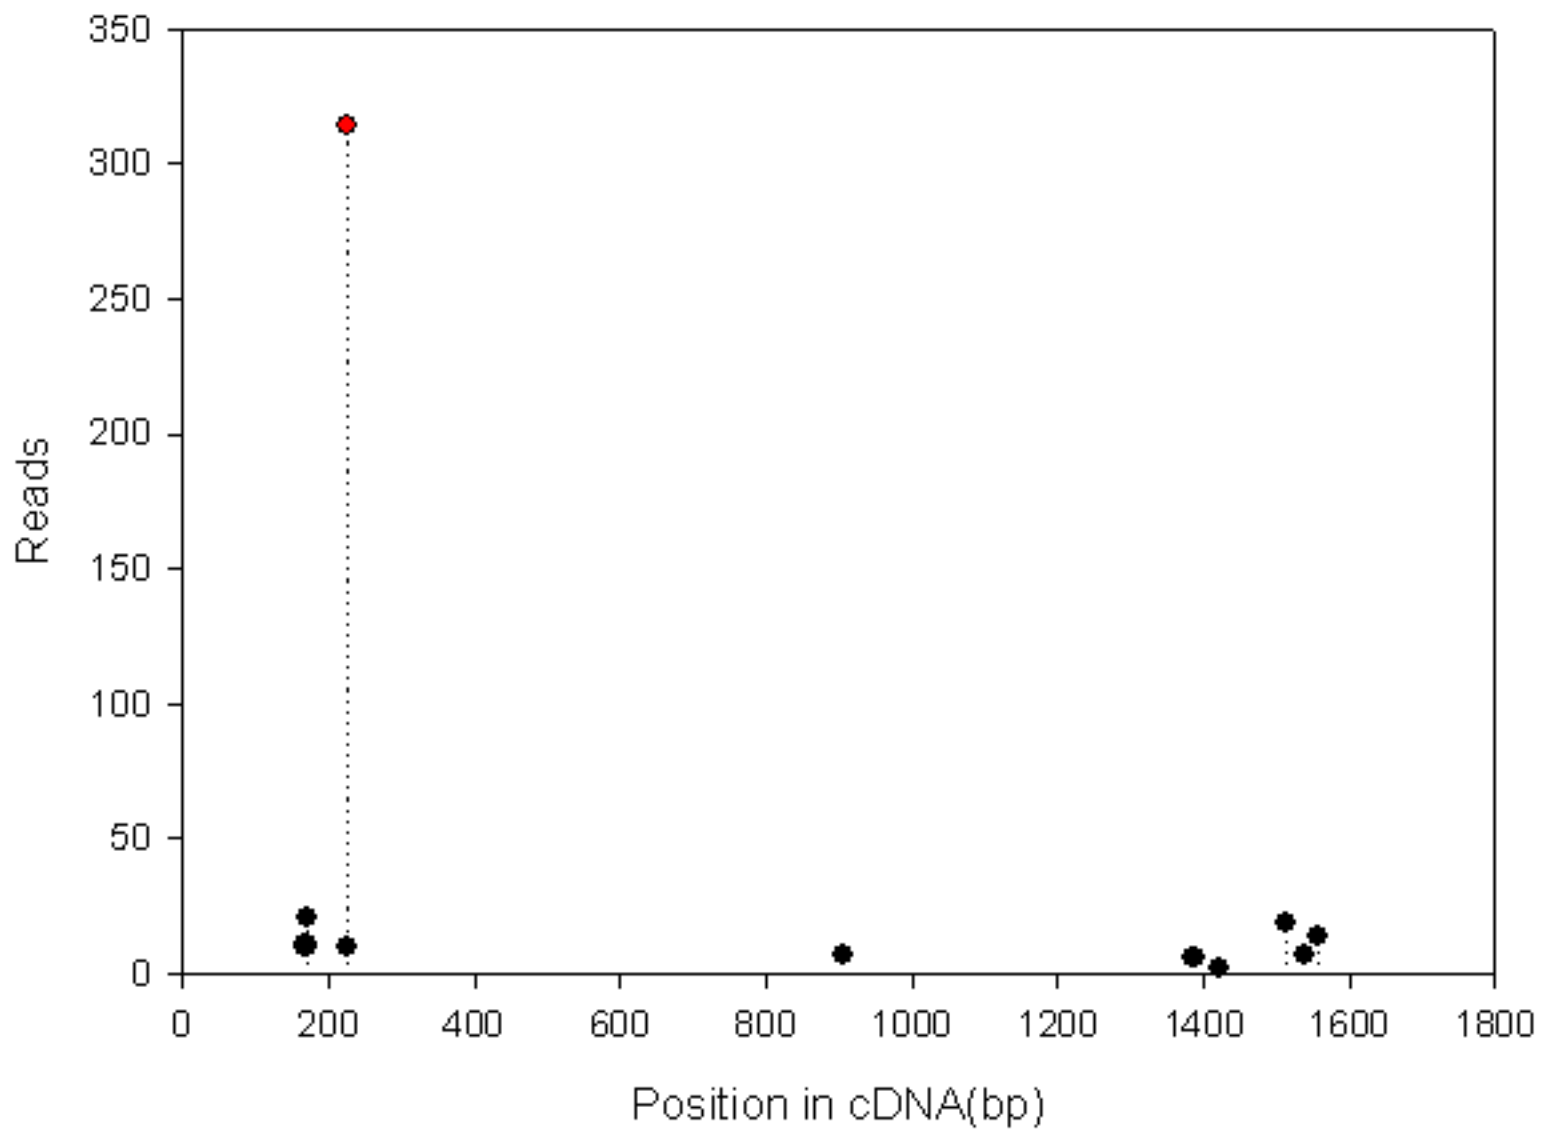

5' GAAGUUCAAGAAAUCUGUGGGAAGAA 3'  
 ::::::::::: :::::::::::  
 3' ----AAGUUCUUUCGACACCUU---- 5'

Cs1g22520.1  
 Csi-miR396b.2



Csi-miR396b.2, target=Cs3g23180.1 gene=Cs3g23180  
 Category:3  
 Score=3  
 Cleavage Site=625



```

5' AAAGAUCAAGGAAGCUGUGGGAGUUG 3'      Cs3g23180.1
   : : : : : : : : : : : : : : : :
3' ----AAGUUCUUUCGACACCUU---- 5'      Csi-miR396b.2
  
```

Csi-miR396b.2, target=Cs5g09850.1 gene=Cs5g09850  
 Category:2  
 Score=2  
 Cleavage Site=767



```

5' UGCGUUCAAGAAAGCUUGUGGAAGCU 3'
   :::::::::::::: ::::::::::
3' ----AAGUUCUUUCG-ACACCU---- 5'
  
```

Cs5g09850.1

Csi-miR396b.2

Csi-miR396b.2, target=Cs6g15330.1 gene=Cs6g15330  
 Category: 1  
 Score=2  
 Cleavage Site=449



```

5' ACCGUUCAAGAAAGCAUGUGGAAAUC 3'      Cs6g15330.1
   :::::::::::::: :::::::
3' ----AAGUUCUUUCG-ACACCUU---- 5'      Csi-miR396b.2
  
```

Csi-miR396b.2, target=Cs7g15220.1 gene=Cs7g15220  
 Category=1  
 Score=2  
 Cleavage Site=377



```

5' ACCGUUCAAGAAAGCCUGUGGAAUCA 3'      Cs7g15220.1
   :::::::::::::: ::::::::::::::
3' ----AAGUUCUUUC-GACACCUU---- 5'      Csi-miR396b.2
  
```

Csi-miR396b.2, target=Cs8g17370.1 gene=Cs8g17370  
 Category:3  
 Score=4.5  
 Cleavage Site=138

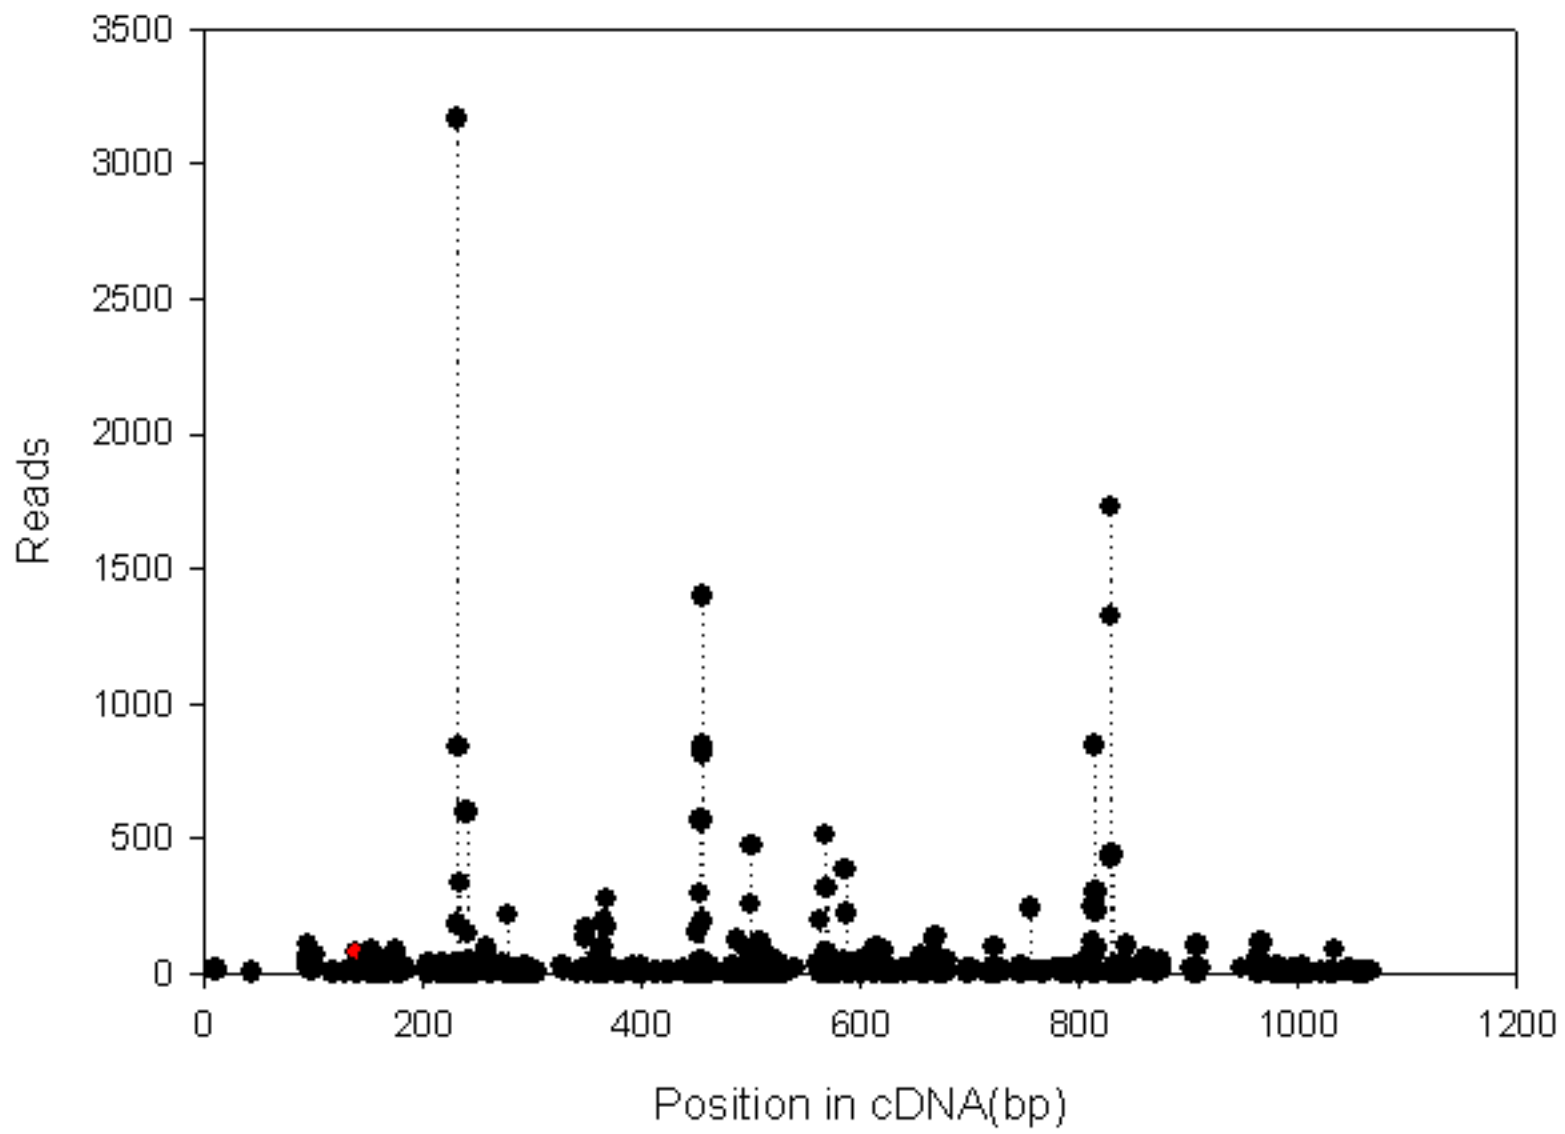

```

5' CGAGGAUUACAAGAAGGCCGUGGAGA 3'      Cs8g17370.1
   : : : : : : : : : : : : : : :
3' -----AAGUUCUUUCGACACCUU- 5'      Csi-miR396b.2

```

Csi-miR396b.2, target=Orange1.1t02555.1 gene=Orange1.1t02555  
 Category:1  
 Score=2  
 Cleavage Site=920

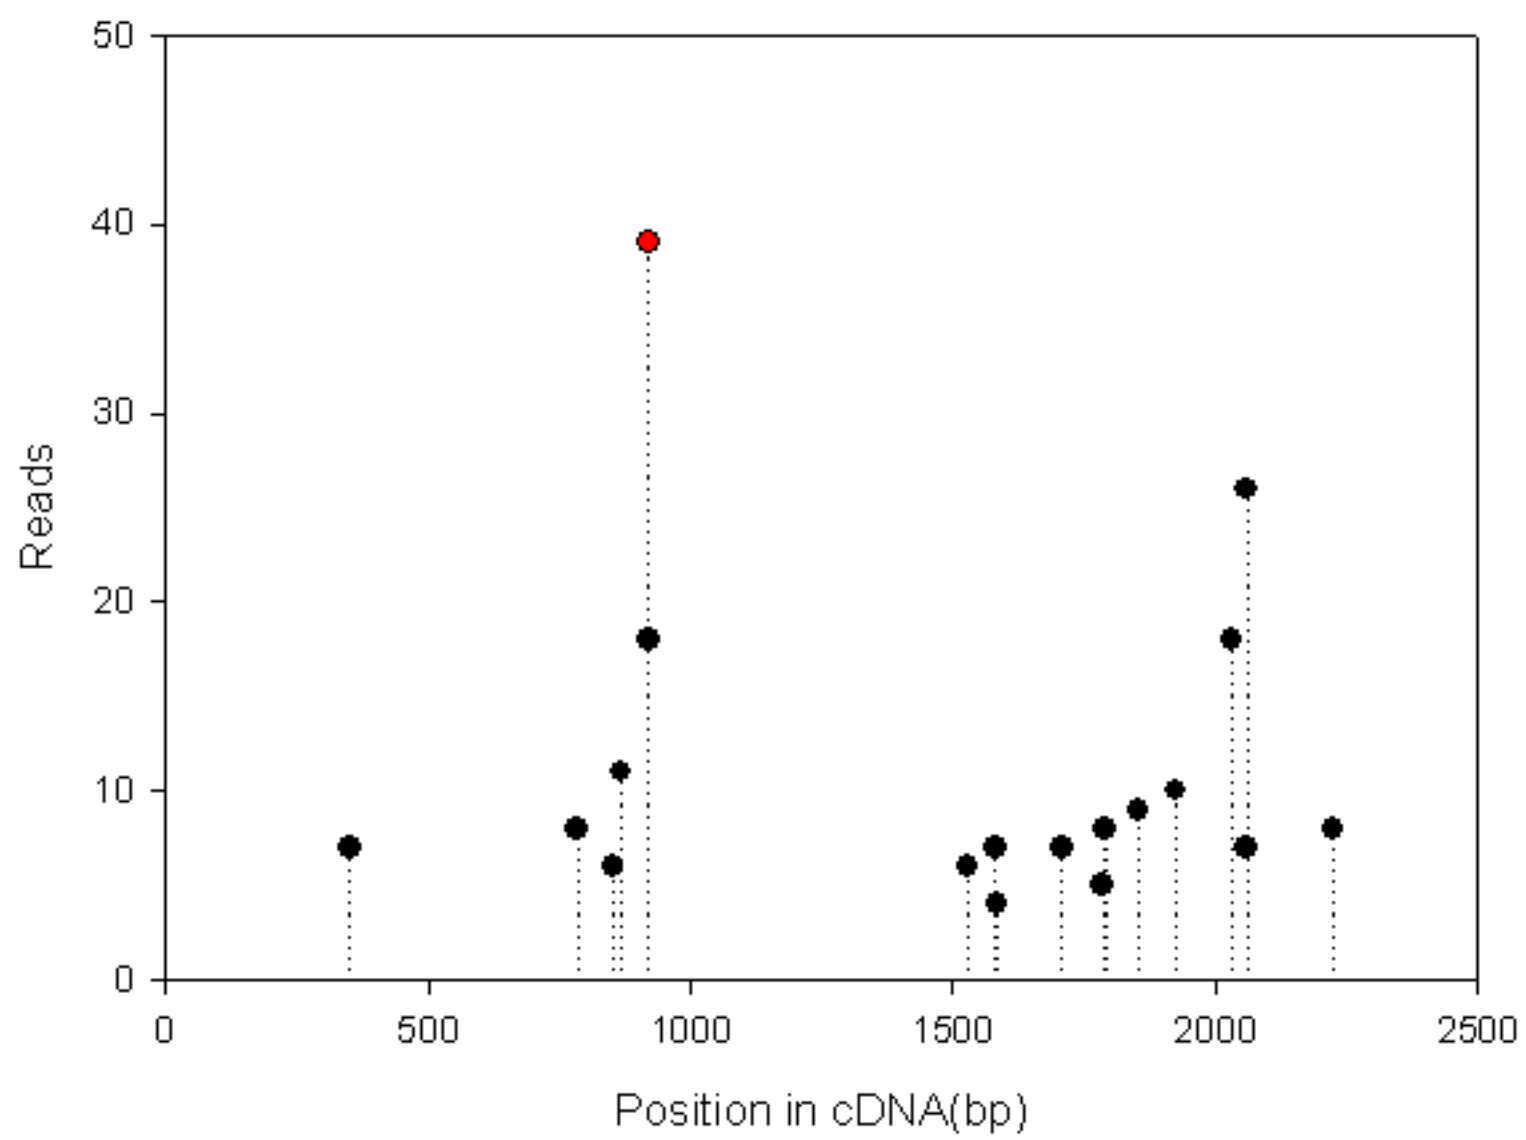

5' CACGUUCAAGAAAGCCUGUGGAACUU 3'  
 ::::::::::: :::::::::::  
 3' ----AAGUUCUUUC-GACACCUU---- 5'

Orange1.1t02555.1

Csi-miR396b.2

Csi-miR396b.2, target=Orange1.1t03122.1 gene=Orange1.1t03122  
 Category=1  
 Score=2  
 Cleavage Site=583



```

5' ACCGUUCAAGAAAGCCUGUGGAAUCA 3'
   ::::::::::: :::::::::::
3' ----AAGUUCUUUC-GACACCUU---- 5'
  
```

```

Orange1.1t03122.1
Csi-miR396b.2
  
```

Csi-miR396b.3, target=Cs1g22520.1 gene=Cs1g22520  
 Category:1  
 Score=3  
 Cleavage Site=226



```

5' GAAGUUCAAGAAAUCUGUGGGAAGAA 3'          Cs1g22520.1
   ::::::::::::::: :::::::::::
3' -UUCAAGUUCUUUCGACACCUU----- 5'       Csi-miR396b.3
  
```



Csi-miR396b.3, target=Cs3g23180.1 gene=Cs3g23180  
 Category:3  
 Score=3  
 Cleavage Site=625



|    |                            |    |               |
|----|----------------------------|----|---------------|
| 5' | AAAGAUCAAGGAAGCUGUGGGAGUUG | 3' | Cs3g23180.1   |
|    | .....                      |    |               |
| 3' | -UUCAAGUUCUUUCGACACCUU---- | 5' | Csi-miR396b.3 |

Csi-miR396b.3, target=Cs5g09850.1 gene=Cs5g09850

Category:2

Score=3.5

Cleavage Site=767

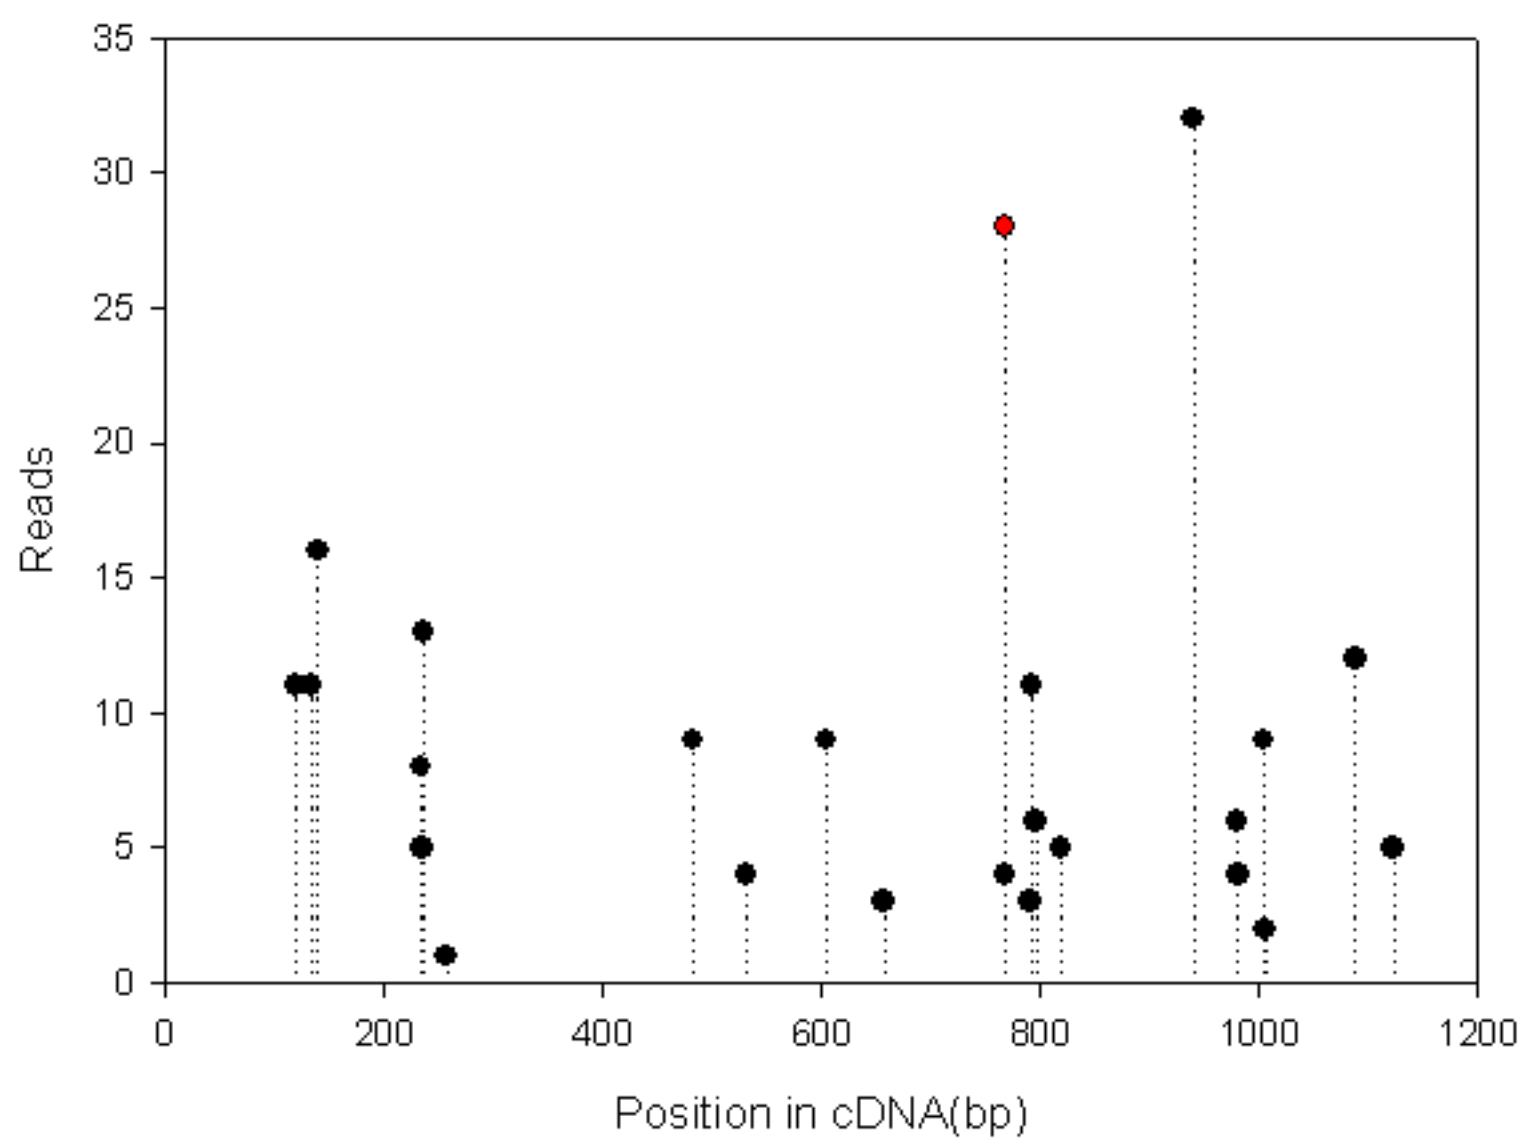

5' UGCGUUCAAGAAAGCUUGUGGAAGCU 3'

Cs5g09850.1

. :::::::::::::: :::::

3' -UUCAAGUUCUUUCG-ACACCUU--- 5'

Csi-miR396b.3

Csi-miR396b.3, target=Cs6g15330.1 gene=Cs6g15330  
 Category: 1  
 Score=4  
 Cleavage Site=449



```

5' ACCGUUCAAGAAAGCAUGUGGAAAUC 3'      Cs6g15330.1
   ::::::::::::::: :::::::
3' -UUCAAGUUCUUUCG-ACACCUU--- 5'      Csi-miR396b.3
  
```

Csi-miR396b.3, target=Cs7g15220.1 gene=Cs7g15220  
 Category=1  
 Score=4  
 Cleavage Site=377



```

5' ACCGUUCAAGAAAGCCUGUGGAAUCA 3'      Cs7g15220.1
   :::::::::::::: ::::::::::::::
3' -UUCAAGUUCUUUC-GACACCUU--- 5'      Csi-miR396b.3

```

Csi-miR396b.3, target=Orange1.1t03122.1 gene=Orange1.1t03122  
 Category=1  
 Score=4  
 Cleavage Site=583



```

5' ACCGUUCAAGAAAGCCUGUGGAAUCA 3'
   :::::::::::::: ::::::::::
3' -UUCAAGUUCUUUC-GACACCUU--- 5'
  
```

```

Orange1.1t03122.1
Csi-miR396b.3
  
```

Csi-miR396b-3p.1, target=Cs9g04080.1 gene=Cs9g04080

Category=3

Score=5

Cleavage Site=311

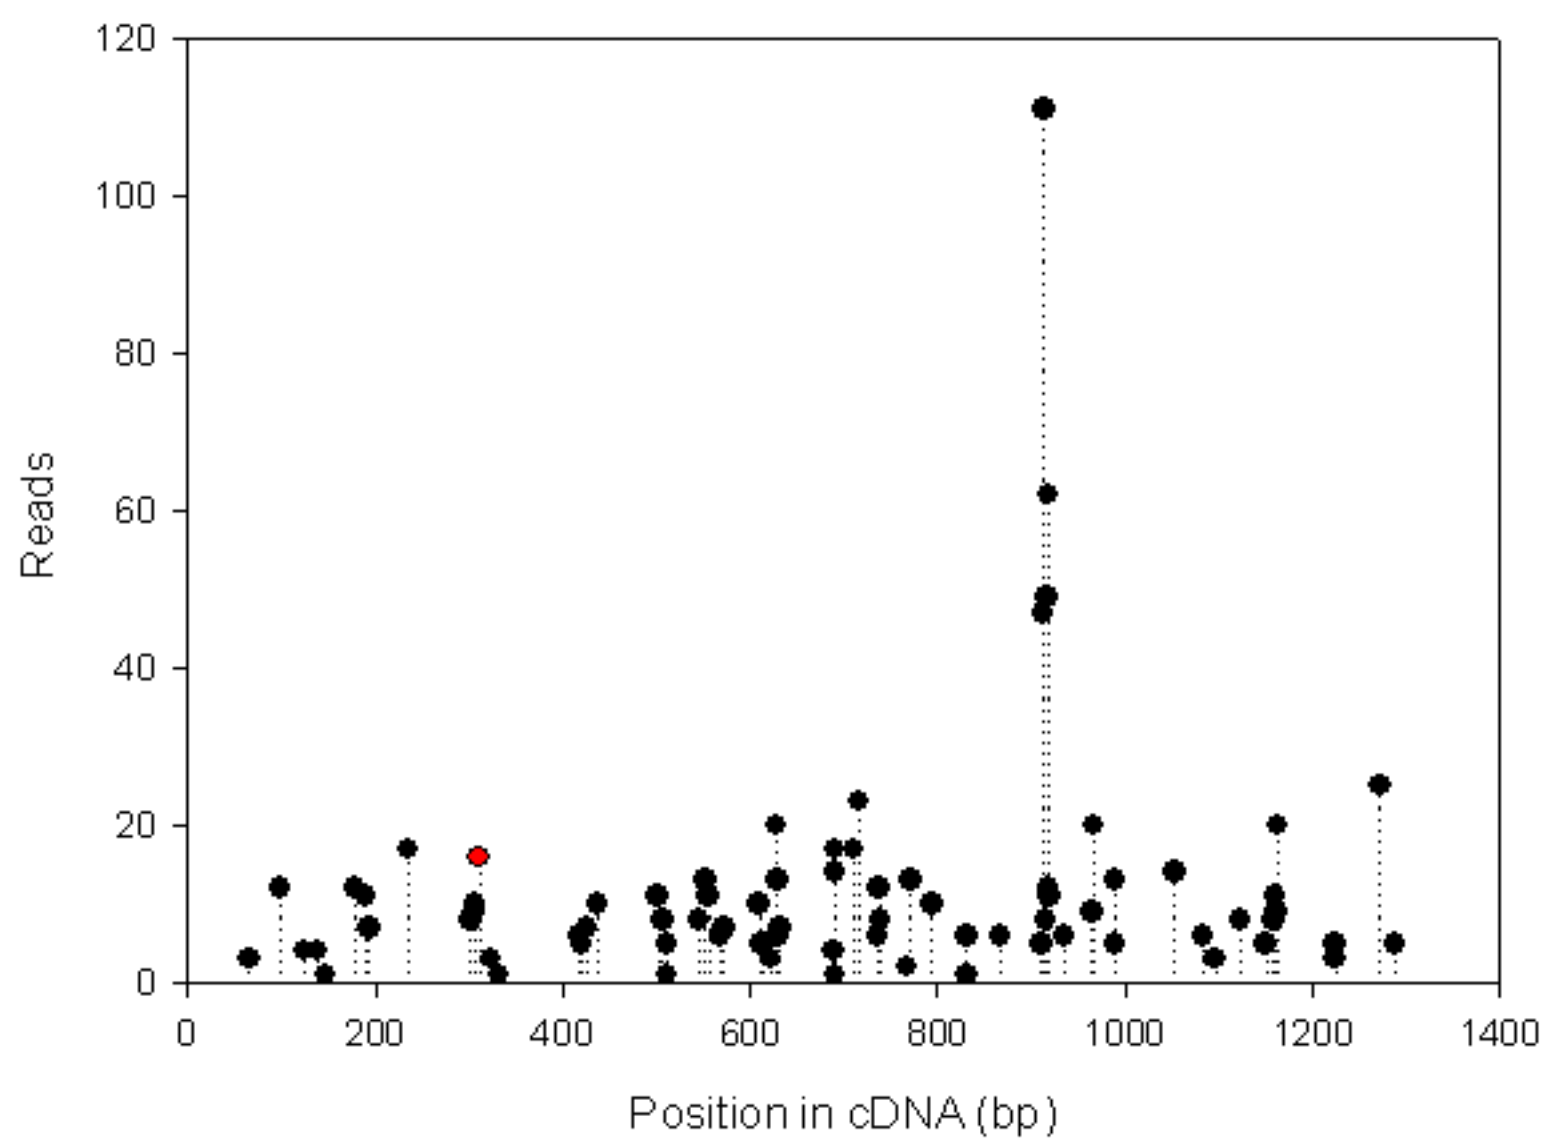

5' UCUCUCCUUCACGGCUUCCUGAGC 3'

Cs9g04080.1

:: ..:::..:::~::~:

3' -----AGAGGGUGUCGAAAGAACUCG 5'

Csi-miR396b-3p.1

Csi-miR396b-3p.2, target=Cs9g04080.1 gene=Cs9g04080  
 Category=3  
 Score=5  
 Cleavage Site=311

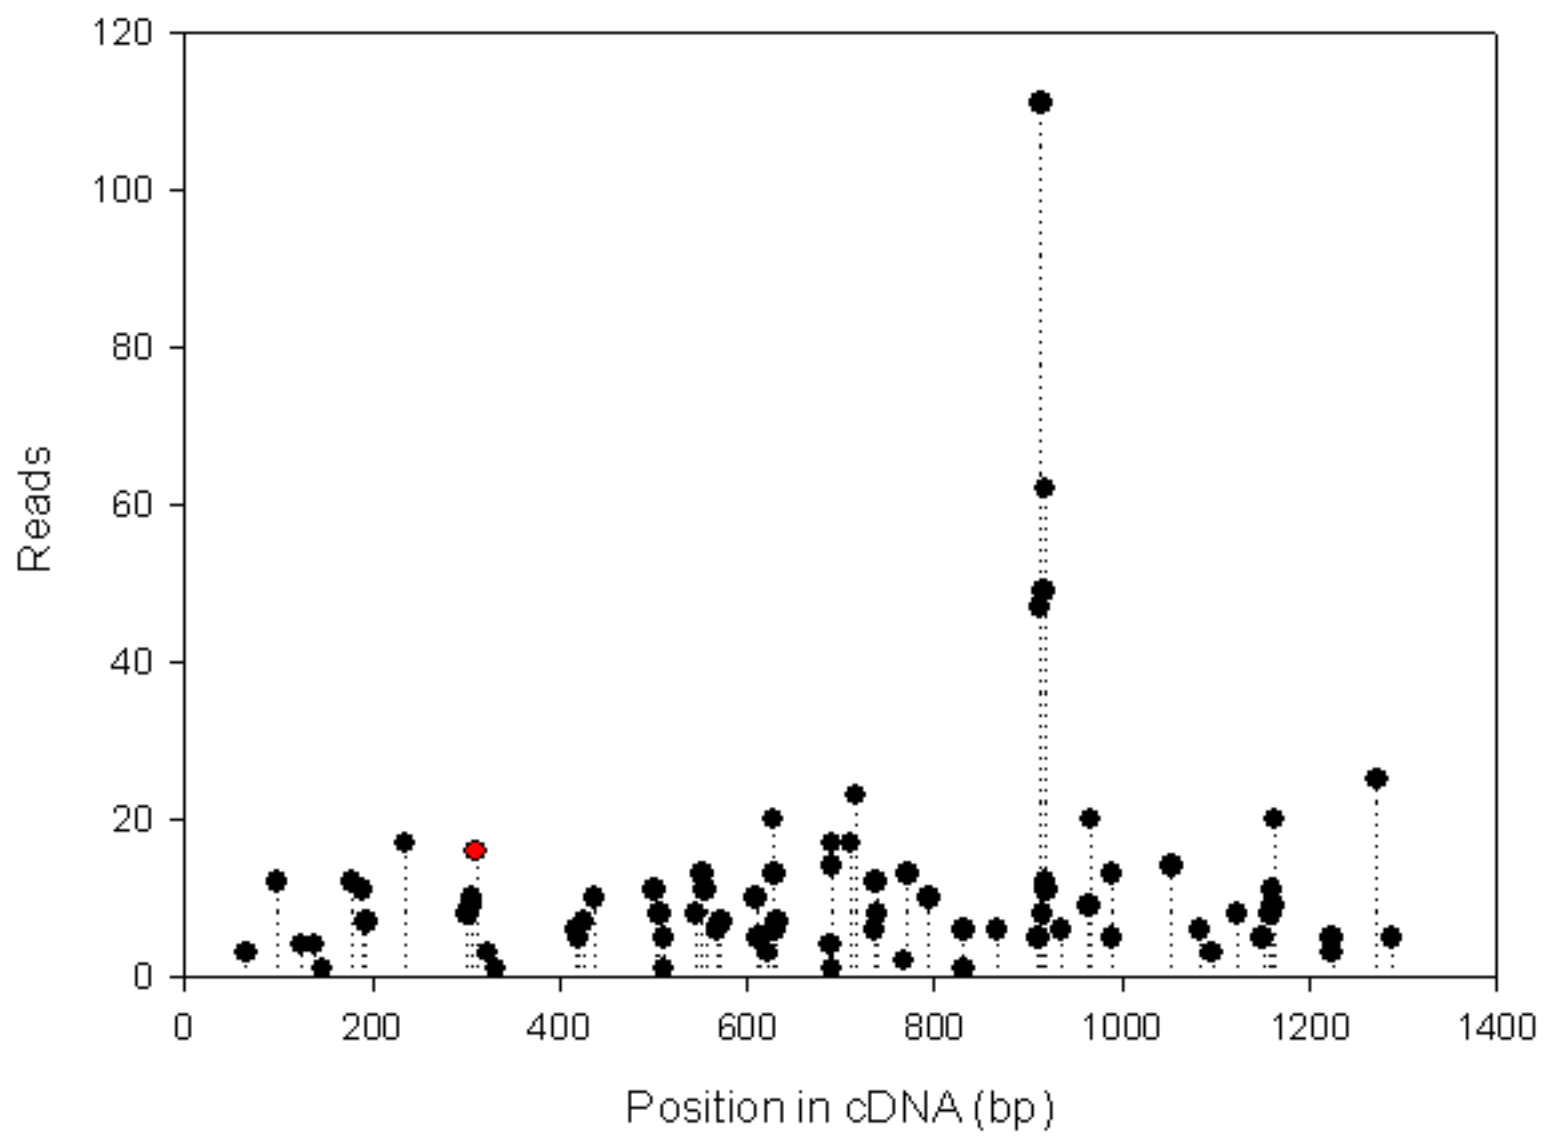

```

5' UCUCUCCUUCACGGCUUCCUGAGC 3'          Cs9g04080.1
   ..:..:..:..:..:..:..:..:..:..:..:
3' -----AGAGGGUGUCGAAAGAACUC- 5'      Csi-miR396b-3p.2
  
```

Csi-miR396c, target=Cs2g09460.1 gene=Cs2g09460  
 Category=3  
 Score=5  
 Cleavage Site=812

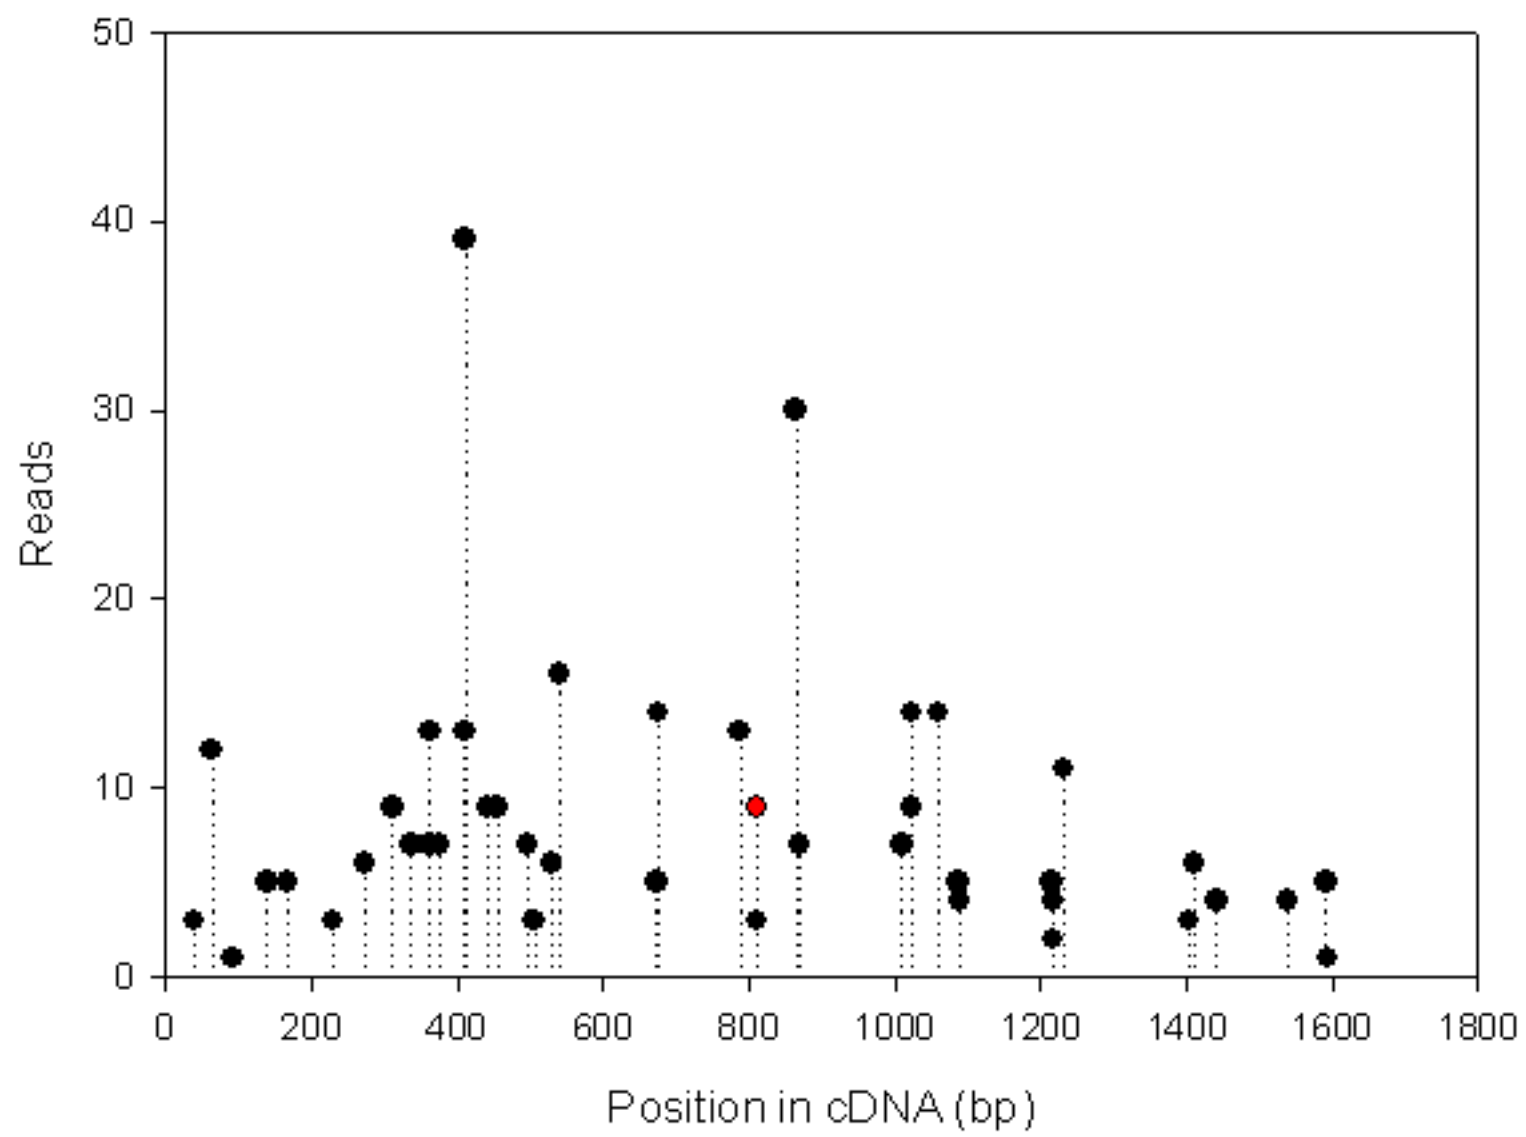

```

5' UCUGCUCCCUCAGA-CUCUUGAAGCU 3'      Cs2g09460.1
   : : : : : : : : : : : : : : : :
3' ----GAAGGGUGUCUAAAGAACUU---- 5'      Csi-miR396c
  
```



Csi-miR396d.1, target=Cs1g22520.1 gene=Cs1g22520  
 Category:1  
 Score=4  
 Cleavage Site=226



```

5' GAAGUUCAAGAAAUCUGUGGGAAGAA 3'      Cs1g22520.1
   ::::::::::: :::::::::::
3' --UCAAGUUCUUUCGGCACCUUU--- 5'      Csi-miR396d.1
  
```

Csi-miR396d.1, target=Cs3g23180.1 gene=Cs3g23180  
 Category:3  
 Score=4.5  
 Cleavage Site=625



```

5' AAAGAUCAAGGAAGCUGUGGGAGUUG 3'      Cs3g23180.1
   :: ::::::::::::::::::::
3' --UCAAGUUCUUUCGGCACCUUU--- 5'      Csi-miR396d.1

```

Csi-miR396d.1, target=Cs5g09850.1 gene=Cs5g09850  
 Category:2  
 Score=4.5  
 Cleavage Site=767

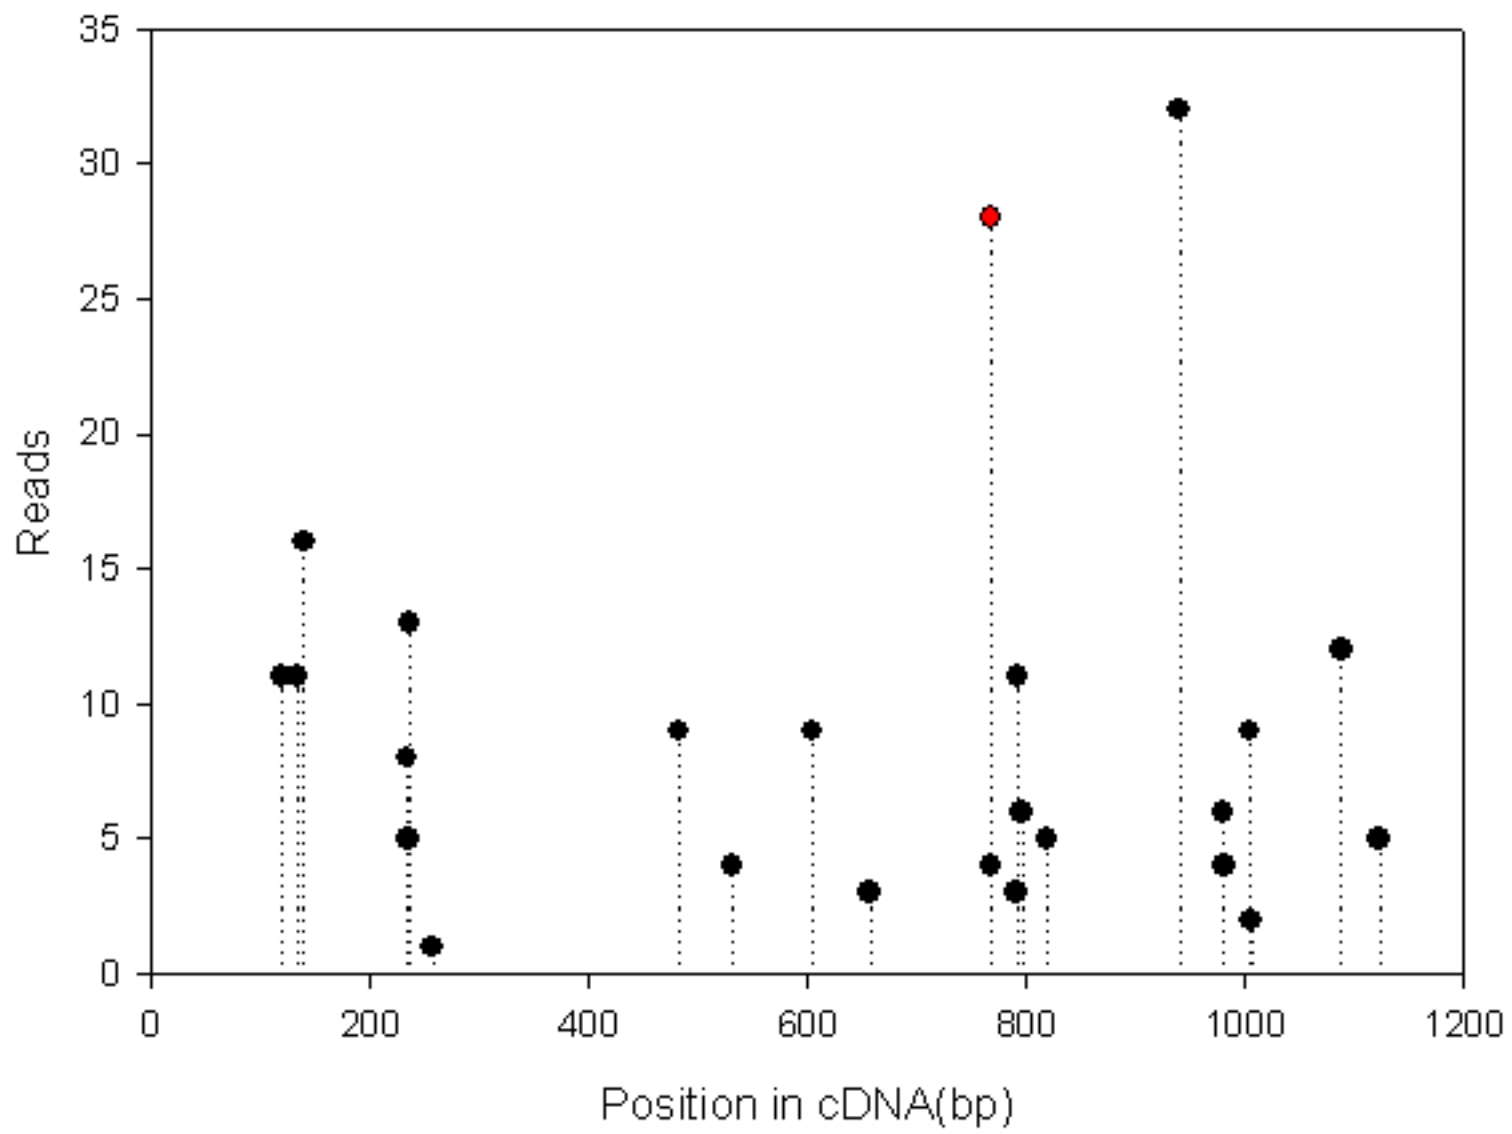

5' UGCGUUCAAGAAAGCUUGUGGAAGCU 3'  
 ::::::::::: .:::::  
 3' --UCAAGUUCUUUCG-GCACCUUU-- 5'

Cs5g09850.1

Csi-miR396d.1

Csi-miR396d.1, target=Cs6g15330.1 gene=Cs6g15330  
 Category: 1  
 Score=4  
 Cleavage Site=449



```

5' ACCGUUCAAGAAAGCAUGUGGAAAUC 3'      Cs6g15330.1
    ::::::::::::::: .::::::::::::
3' --UCAAGUUCUUUCG-GCACCUUU-- 5'      Csi-miR396d.1
  
```

Csi-miR396d.1, target=Cs7g15220.1 gene=Cs7g15220  
 Category=1  
 Score=4  
 Cleavage Site=377



```

5' ACCGUUCAAGAAAGCCUGUGGAAUCA 3'      Cs7g15220.1
   ::::::::::::::: :::::
3' --UCAAGUUCUUUCGG-CACCUUU-- 5'      Csi-miR396d.1

```

Csi-miR396d.1, target=Orange1.1t03122.1 gene=Orange1.1t03122  
 Category=1  
 Score=4  
 Cleavage Site=583



```

5' ACCGUUCAAGAAAGCCUGUGGAAUCA 3'      Orange1.1t03122.1
   :::::::::::::::::::::
3' --UCAAGUUCUUUCGG-CACCUUU-- 5'      Csi-miR396d.1
  
```

Csi-miR396d.2, target=Cs1g22520.1 gene=Cs1g22520  
 Category:1  
 Score=4  
 Cleavage Site=226



```

5' GAAGUUCAAGAAAUCUGUGGGAAGAA 3'      Cs1g22520.1
   : : : : : : : : : : : : : : : :
3' -UUCAAGUUCUUUCGGCACCUU----- 5'    Csi-miR396d.2
  
```

Csi-miR396d.2, target=Cs3g23180.1 gene=Cs3g23180  
 Category:3  
 Score=4  
 Cleavage Site=625



```

5' AAAGAUCAAGGAAGCUGUGGGAGUUG 3'      Cs3g23180.1
   :: :::::..:::..:::..:::..:::..:::
3' -UUCAAGUUCUUUCGGCACCUU----- 5'    Csi-miR396d.2
  
```



Csi-miR396d.2, target=Cs5g09850.1 gene=Cs5g09850  
 Category:2  
 Score=4.5  
 Cleavage Site=767



```

5' UCGUUCAAGAAAGCUUGUGGAAGCU 3'      Cs5g09850.1
. : : : : : : : : : : : : : : :
3' -UUCAAGUUCUUUCG-GCACCUU--- 5'      Csi-miR396d.2
  
```

Csi-miR396d.2, target=Cs6g15330.1 gene=Cs6g15330  
 Category: 1  
 Score=5  
 Cleavage Site=449



```

5' ACCGUUCAAGAAAGCAUGUGGAAAUC 3'      Cs6g15330.1
   ::::::::::::::: .::::::::::
3' -UUCAAGUUCUUUCG-GCACCUU--- 5'      Csi-miR396d.2
  
```

Csi-miR396d.2, target=Cs7g15220.1 gene=Cs7g15220  
 Category=1  
 Score=4  
 Cleavage Site=377



5' ACCGUUCAAGAAAGCCUGUGGAAUCA 3'  
 :::::::::::::::::::: :::::::  
 3' -UUCAAGUUCUUUCGG-CACCUU--- 5'

Cs7g15220.1

Csi-miR396d.2

Csi-miR396d.2, target=Orange1.1t03122.1 gene=Orange1.1t03122  
 Category=1  
 Score=4  
 Cleavage Site=583



|                                  |                   |
|----------------------------------|-------------------|
| 5' ACCGUUCAAGAAAGCCUGUGGAAUCA 3' | Orange1.1t03122.1 |
| ::::::::::::          :::::      |                   |
| 3' -UUCAAGUUCUUUCGG-CACCUU--- 5' | Csi-miR396d.2     |

Csi-miR396d.3, target=Cs1g22520.1 gene=Cs1g22520  
 Category:1  
 Score=4  
 Cleavage Site=226



```

5' GAAGUUCAAGAAAUCUGUGGGAAGAA 3'      Cs1g22520.1
   : : : : : : : : : : : : : : : :
3' ---CAAGUUCUUUCGGCACCUU----- 5'      Csi-miR396d.3
  
```

Csi-miR396d.3, target=Cs3g23180.1 gene=Cs3g23180  
 Category:3  
 Score=4  
 Cleavage Site=625



```

5' AAAGAUCAAGGAAGCUGUGGGAGUUG 3'      Cs3g23180.1
   : : : : : : : : : : : : : : : :
3' ---CAAGUUCUUUCGGCACCUU---- 5'      Csi-miR396d.3
  
```

Csi-miR396d.3, target=Cs5g09850.1 gene=Cs5g09850  
 Category:2  
 Score=3  
 Cleavage Site=767



```

5' UGCGUUCAAGAAAGCUUGUGGAAGCU 3'      Cs5g09850.1
      ::::::::::: .:::::
3' ---CAAGUUCUUUCG-GCACCU--- 5'      Csi-miR396d.3
  
```

Csi-miR396d.3, target=Cs6g15330.1 gene=Cs6g15330  
 Category: 1  
 Score=3  
 Cleavage Site=449



5' ACCGUUCAAGAAAGCAUGUGGAAAUC 3'

Cs6g15330.1

.....

3' ---CAAGUUCUUUCG-GCACCUU--- 5'

Csi-miR396d.3



Csi-miR396d.3, target=Cs7g15220.1 gene=Cs7g15220  
 Category=1  
 Score=2  
 Cleavage Site=377



5' ACCGUUCAAGAAAGCCUGUGGAAUCA 3'  
 :::::::::::::: :::::  
 3' ---CAAGUUCUUUCGG-CACCUU--- 5'

Cs7g15220.1

Csi-miR396d.3

Csi-miR396d.3, target=Orange1.1t03122.1 gene=Orange1.1t03122  
 Category=1  
 Score=2  
 Cleavage Site=583



```

5' ACCGUUCAAGAAAGCCUGUGGAAUCA 3'
   ::::::::::::::: :::::
3' ---CAAGUUCUUUCGG-CACCUU--- 5'
  
```

Orange1.1t03122.1

Csi-miR396d.3

Csi-miR396d.4, target=Cs1g22520.1 gene=Cs1g22520  
 Category:1  
 Score=4  
 Cleavage Site=226



```

5' GAAGUUCAAGAAAUCUGUGGGAAGAA 3'      Cs1g22520.1
   ::::::::::: :::::::::::
3' ----AAGUUCUUUCGGCACCUU---- 5'      Csi-miR396d.4
  
```

Csi-miR396d.4, target=Cs3g23180.1 gene=Cs3g23180  
 Category:3  
 Score=4  
 Cleavage Site=625



|    |                                   |    |               |
|----|-----------------------------------|----|---------------|
| 5' | AAAGAUCAAGGAAGCUGUGGGAGUUG        | 3' | Cs3g23180.1   |
|    | : : : : : : : : : : : : : : : : : |    |               |
| 3' | ----AAGUUCUUUCGGCACCUU----        | 5' | Csi-miR396d.4 |

Csi-miR396d.4, target=Cs5g09850.1 gene=Cs5g09850  
 Category:2  
 Score=3  
 Cleavage Site=767



5' UGCGUUCAAGAAAGCUUGUGGAAGCU 3'

Cs5g09850.1

.....

3' ----AAGUUCUUUCG-GCACCUU---- 5'

Csi-miR396d.4

Csi-miR396d.4, target=Cs6g15330.1 gene=Cs6g15330  
 Category: 1  
 Score=3  
 Cleavage Site=449

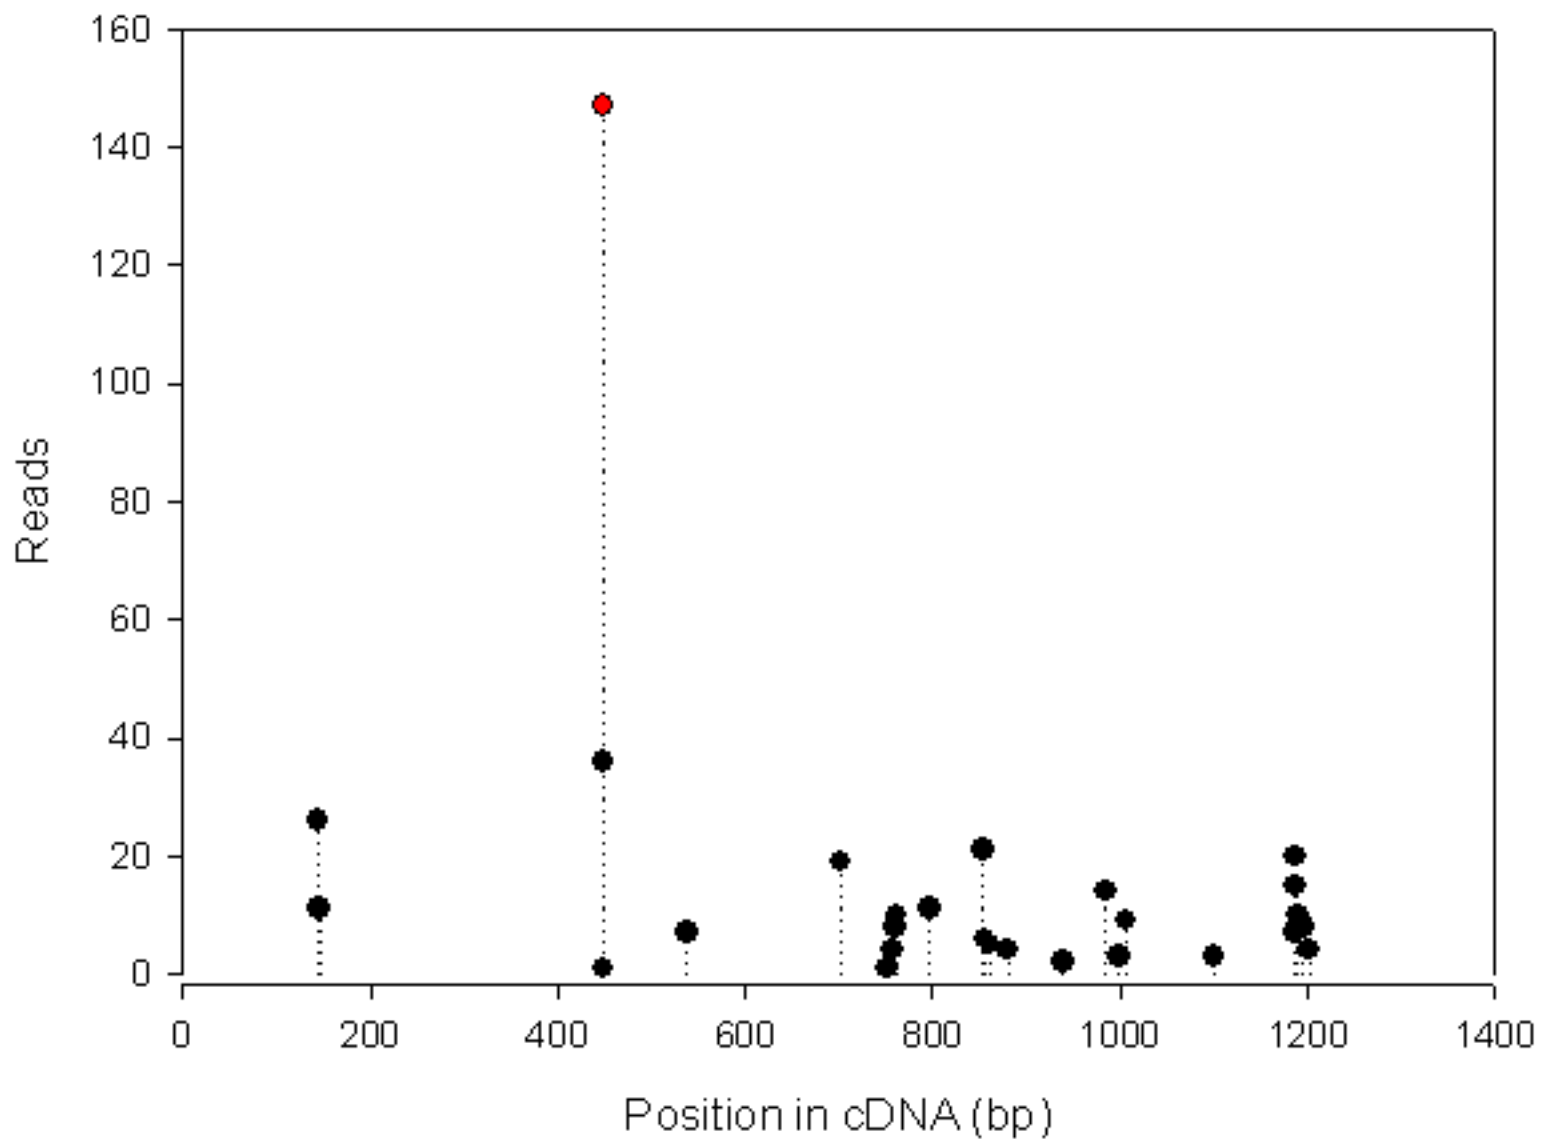

```

5' ACCGUUCAAGAAAGCAUGUGGAAAUC 3'          Cs6g15330.1
   :::::::::::::: .:::::::::
3' ----AAGUUCUUUCG-GCACCUU---- 5'          Csi-miR396d.4

```

Csi-miR396d.4, target=Cs7g15220.1 gene=Cs7g15220  
 Category=1  
 Score=2  
 Cleavage Site=377



```

5' ACCGUUCAAGAAAGCCUGUGGAAUCA 3'      Cs7g15220.1
      ::::::::::::::::::::
3' ----AAGUUCUUUCGG-CACCUU---- 5'      Csi-miR396d.4
  
```

Csi-miR396d.4, target=Cs8g17370.1 gene=Cs8g17370  
 Category:3  
 Score=2.5  
 Cleavage Site=138



```

5' CGAGGAUUACAAGAAGGCCGUGGAGA 3'      Cs8g17370.1
   : : : : : : : : : : : : : : : :
3' -----AAGUUCUUUCGGCACCUU- 5'      Csi-miR396d.4
  
```



Csi-miR396d.4, target=Orange1.1t02555.1 gene=Orange1.1t02555  
 Category:1  
 Score=2  
 Cleavage Site=920



```

5' CACGUUCAAGAAAGCCUGUGGAACUU 3'      Orange1.1t02555.1
   ::::::::::::::: :::::::
3' ----AAGUUCUUUCGG-CACCUU---- 5'      Csi-miR396d.4
  
```

Csi-miR396d.4, target=Orange1.1t03122.1 gene=Orange1.1t03122  
 Category=1  
 Score=2  
 Cleavage Site=583



5' ACCGUUCAAGAAAGCCUGUGGAAUCA 3'  
 :::::::::::::: :::::  
 3' ----AAGUUCUUUCGG-CACCUU---- 5'

Orange1.1t03122.1  
 Csi-miR396d.4

Csi-miR396d-3p, target=Cs8g05290.1 gene=Cs8g05290  
 Category=3  
 Score=5  
 Cleavage Site=160

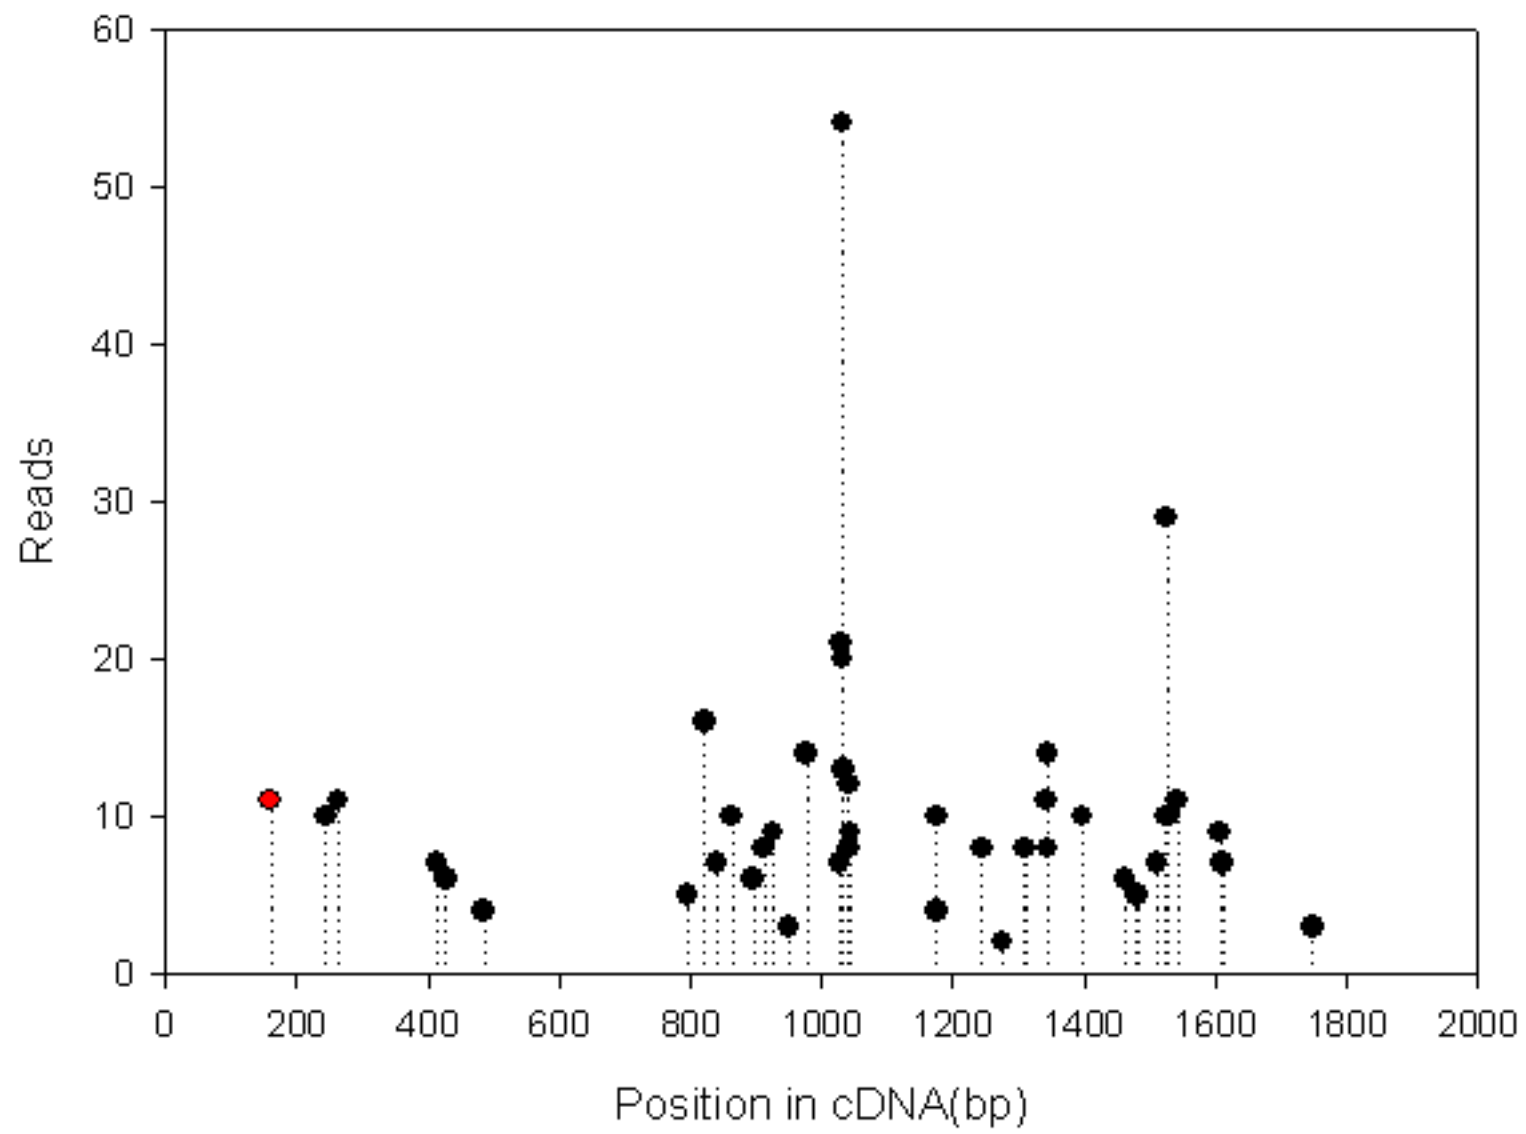

|                                     |                |
|-------------------------------------|----------------|
| 5' UAUUUUUACGGCUUUCUUGAGUCCA 3'     | Cs8g05290.1    |
| : : : : : : : : : : : : : : : : : . |                |
| 3' --AAAGGUGCCGUAAGAACUCG-- 5'      | Csi-miR396d-3p |

Csi-miR397.1, target=Cs6g07450.1 gene=Cs6g07450  
 Category=2  
 Score=2.5  
 Cleavage Site=889

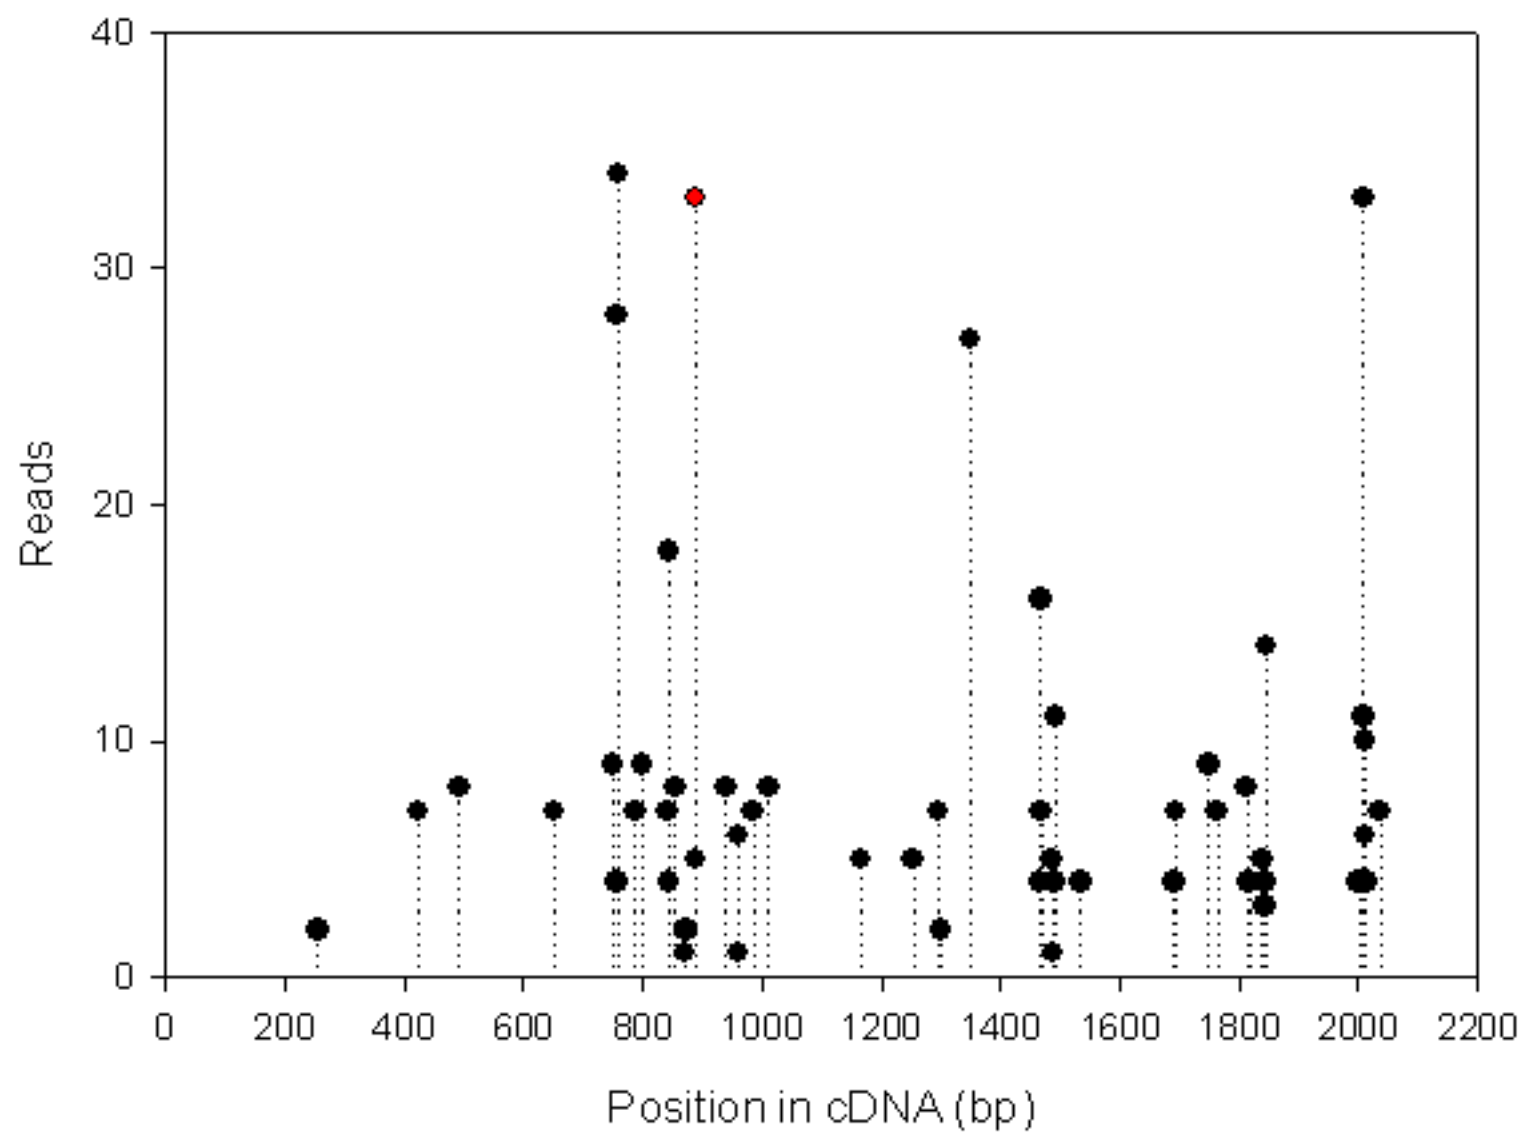

```

5' UCAUCA AUGCUGCACUCAUA ACCAG 3'          Cs6g07450.1
   ::::: . ::::: ::::: :::::
3' -GUAGUUGCGACGUGAGUUACU---- 5'          Csi-miR397.1
  
```

Csi-miR397.2, target=Cs6g07410.1 gene=Cs6g07410  
 Category=1  
 Score=1  
 Cleavage Site=775

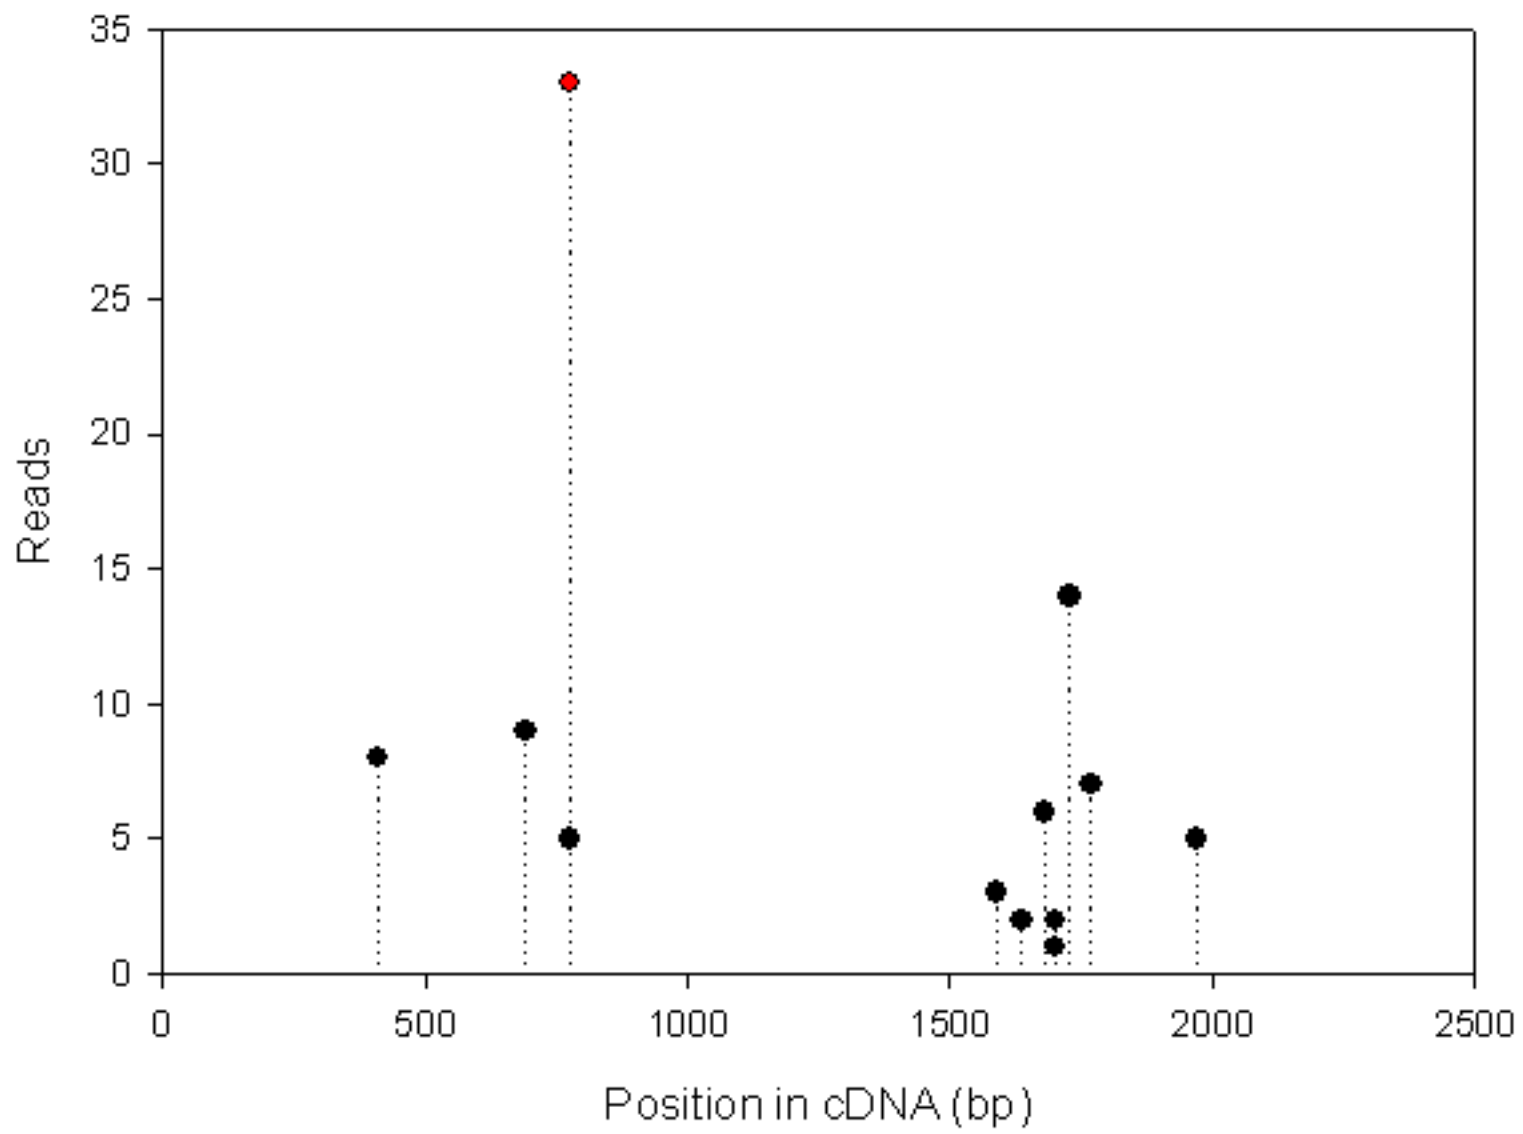

```

5' UCAUCAACGCUGCACUCAUAUACCAG 3'      Cs6g07410.1
   ::::::::::::::::::::
3' AGUAGUUGCGACGUGAGUUAC----- 5'    Csi-miR397.2
  
```

Csi-miR398b, target=Cs1g13240.1 gene=Cs1g13240  
 Category=1  
 Score=4  
 Cleavage Site=273

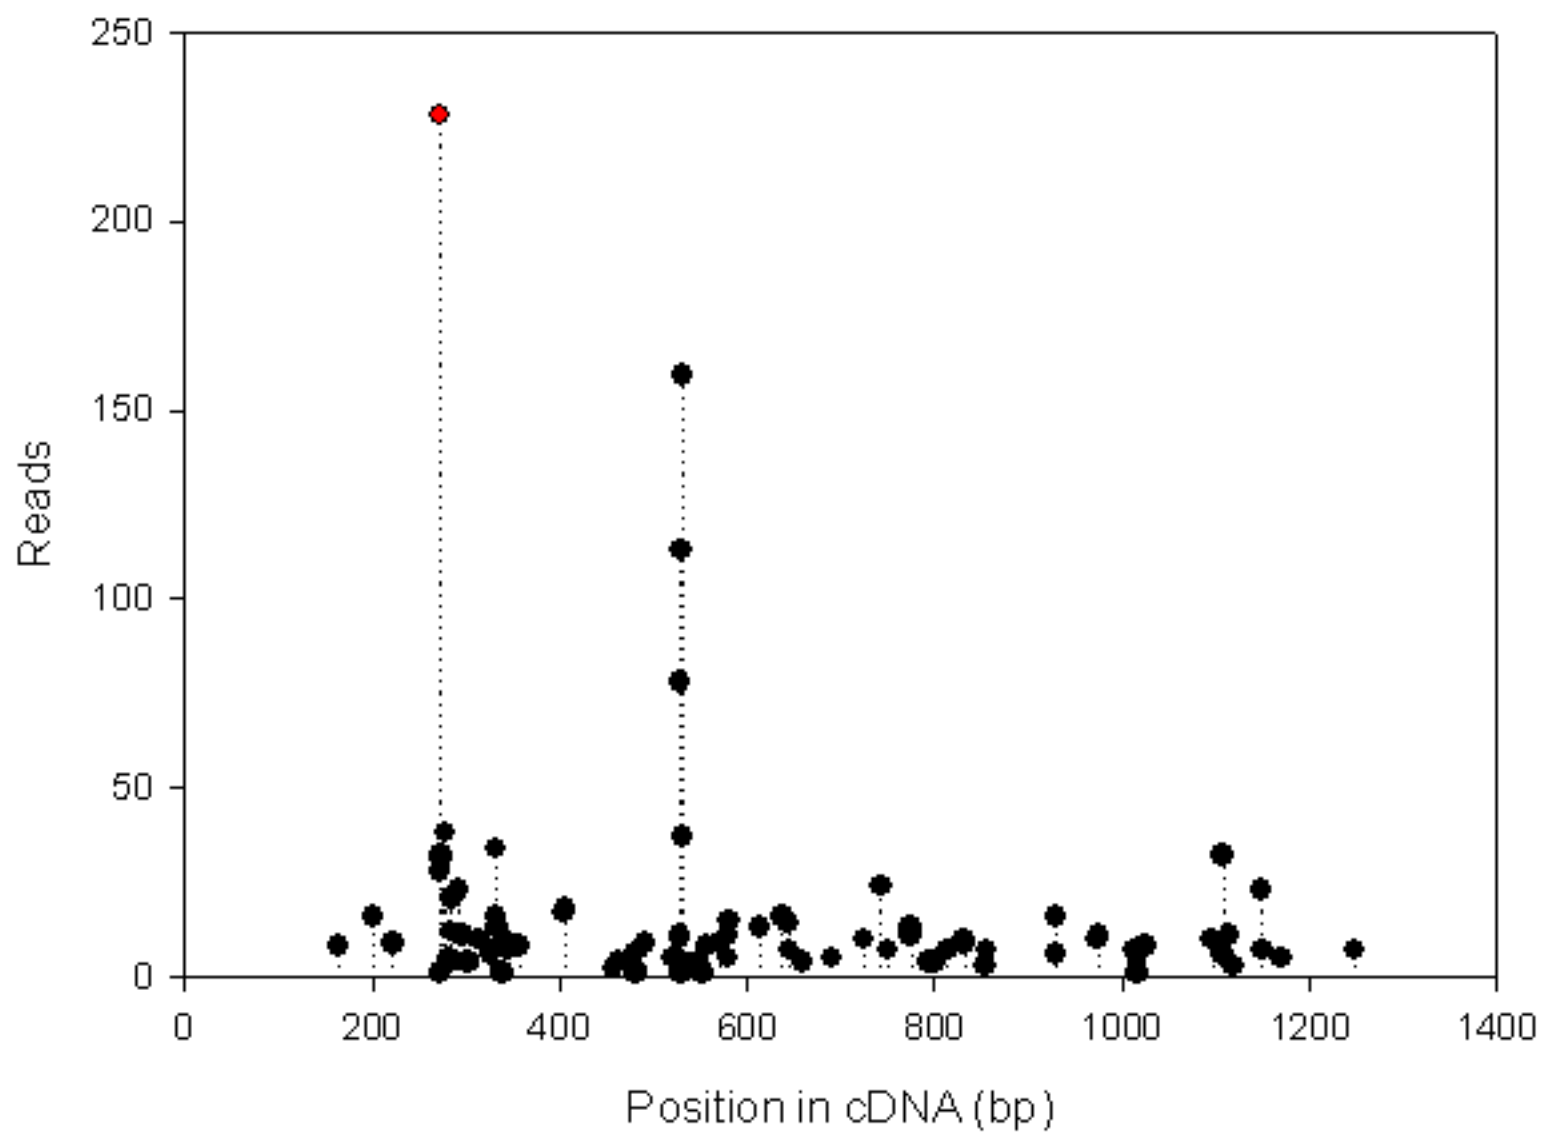

```

5' GAAAAAAGGGGCGACCUGAGAAU-CA 3' Cs1g13240.1
   :::::::::::::::::::: ::
3' -----GUCCCCGCUGGACUCUUGUGU 5' Csi-miR398b
  
```

Csi-miR399a, target=Cs3g22510.1 gene=Cs3g22510  
 Category=3  
 Score=5  
 Cleavage Site=115

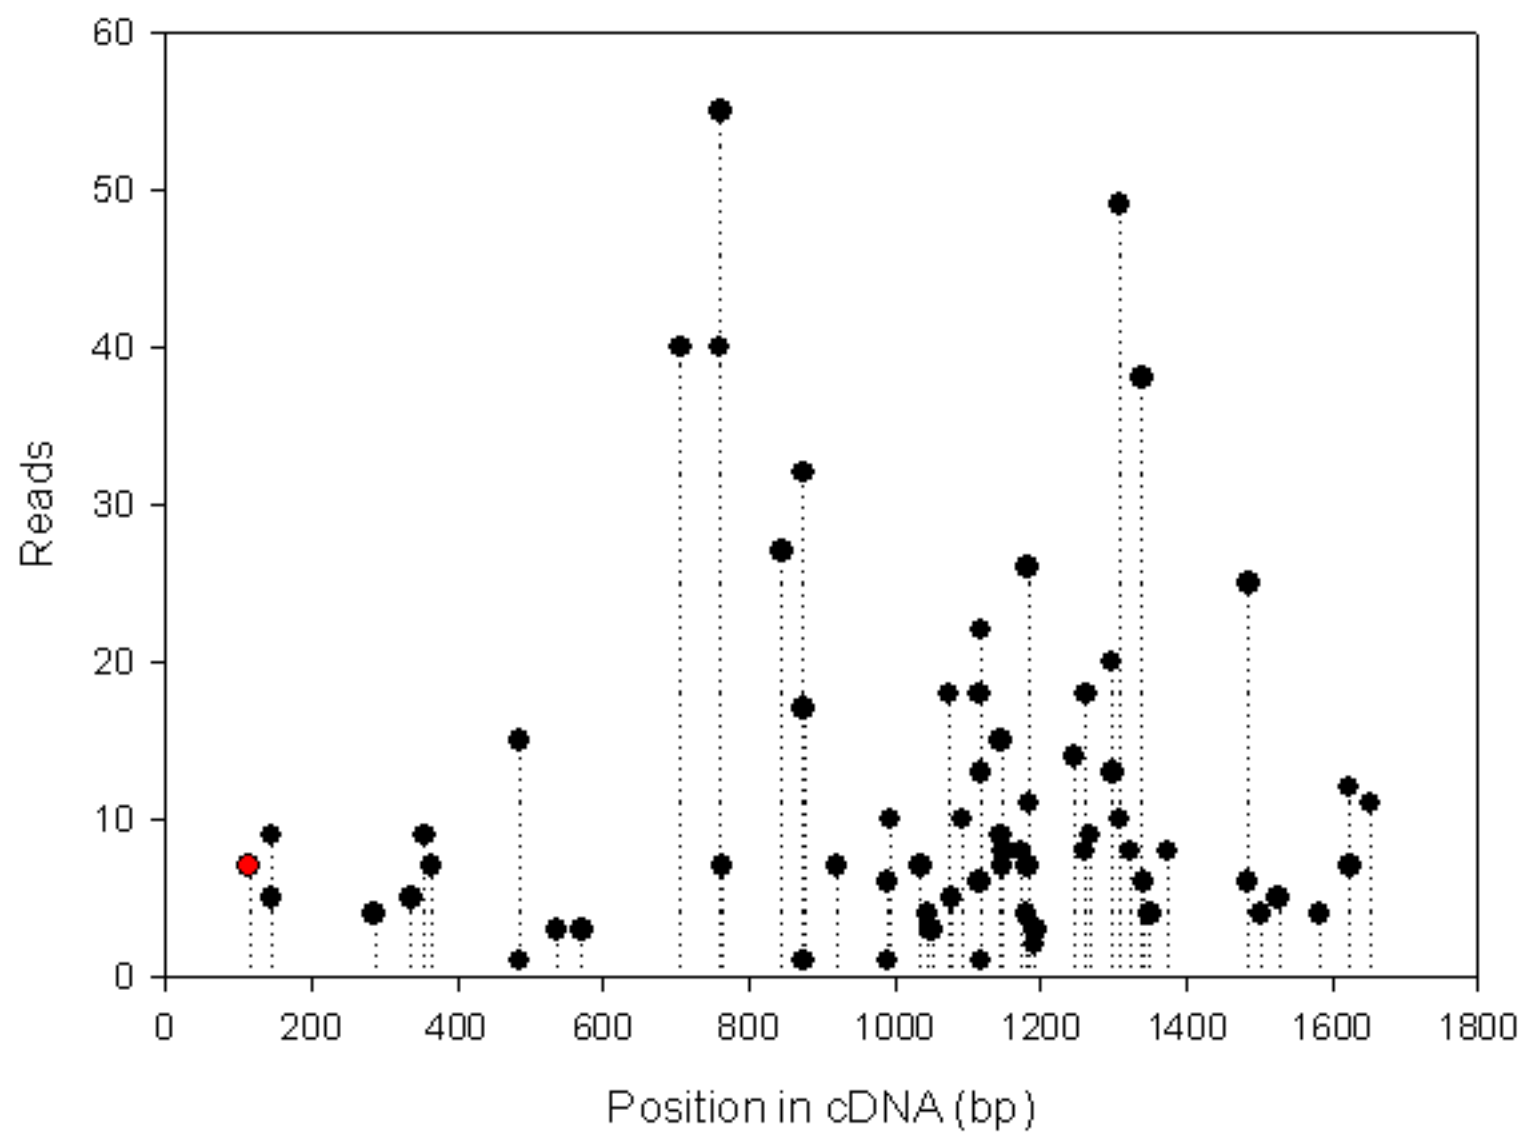

```

5' ACUUGGGCGAAGUCUUCUUGGCUGA 3'      Cs3g22510.1
   ..:::  :::::
3' --GGCCCG-UUUAGAGGAAACCGU-- 5'      Csi-miR399a
  
```

Csi-miR399b, target=Orange1.1t01536.1 gene=Orange1.1t01536  
 Category=3  
 Score=5  
 Cleavage Site=1918

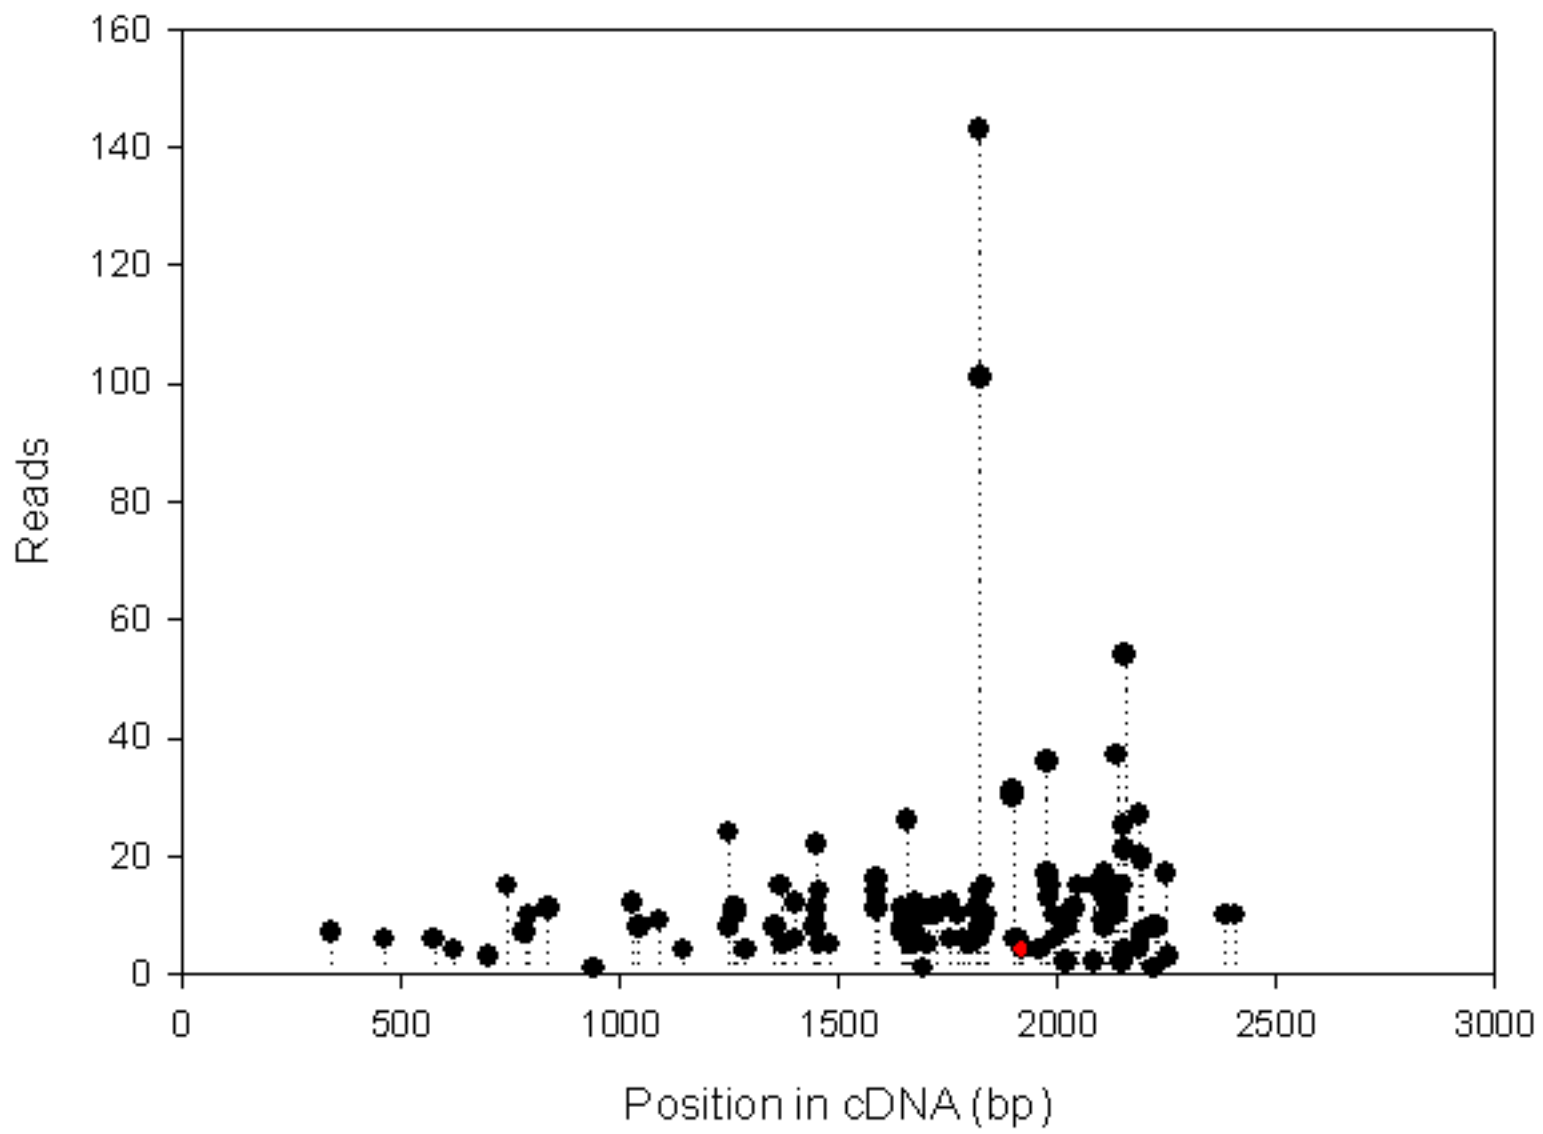

```

5' GGUUCCUGGCCAACUCUCCUCUGGCA 3'
   :: :::::::::::::: :::::
3' -----AUCCCGUUGAGAGGAAACCGU 5'

```

Orange1.1t01536.1

Csi-miR399b



Csi-miR399d, target=Cs2g30260.1 gene=Cs2g30260  
 Category=3  
 Score=4.5  
 Cleavage Site=1438

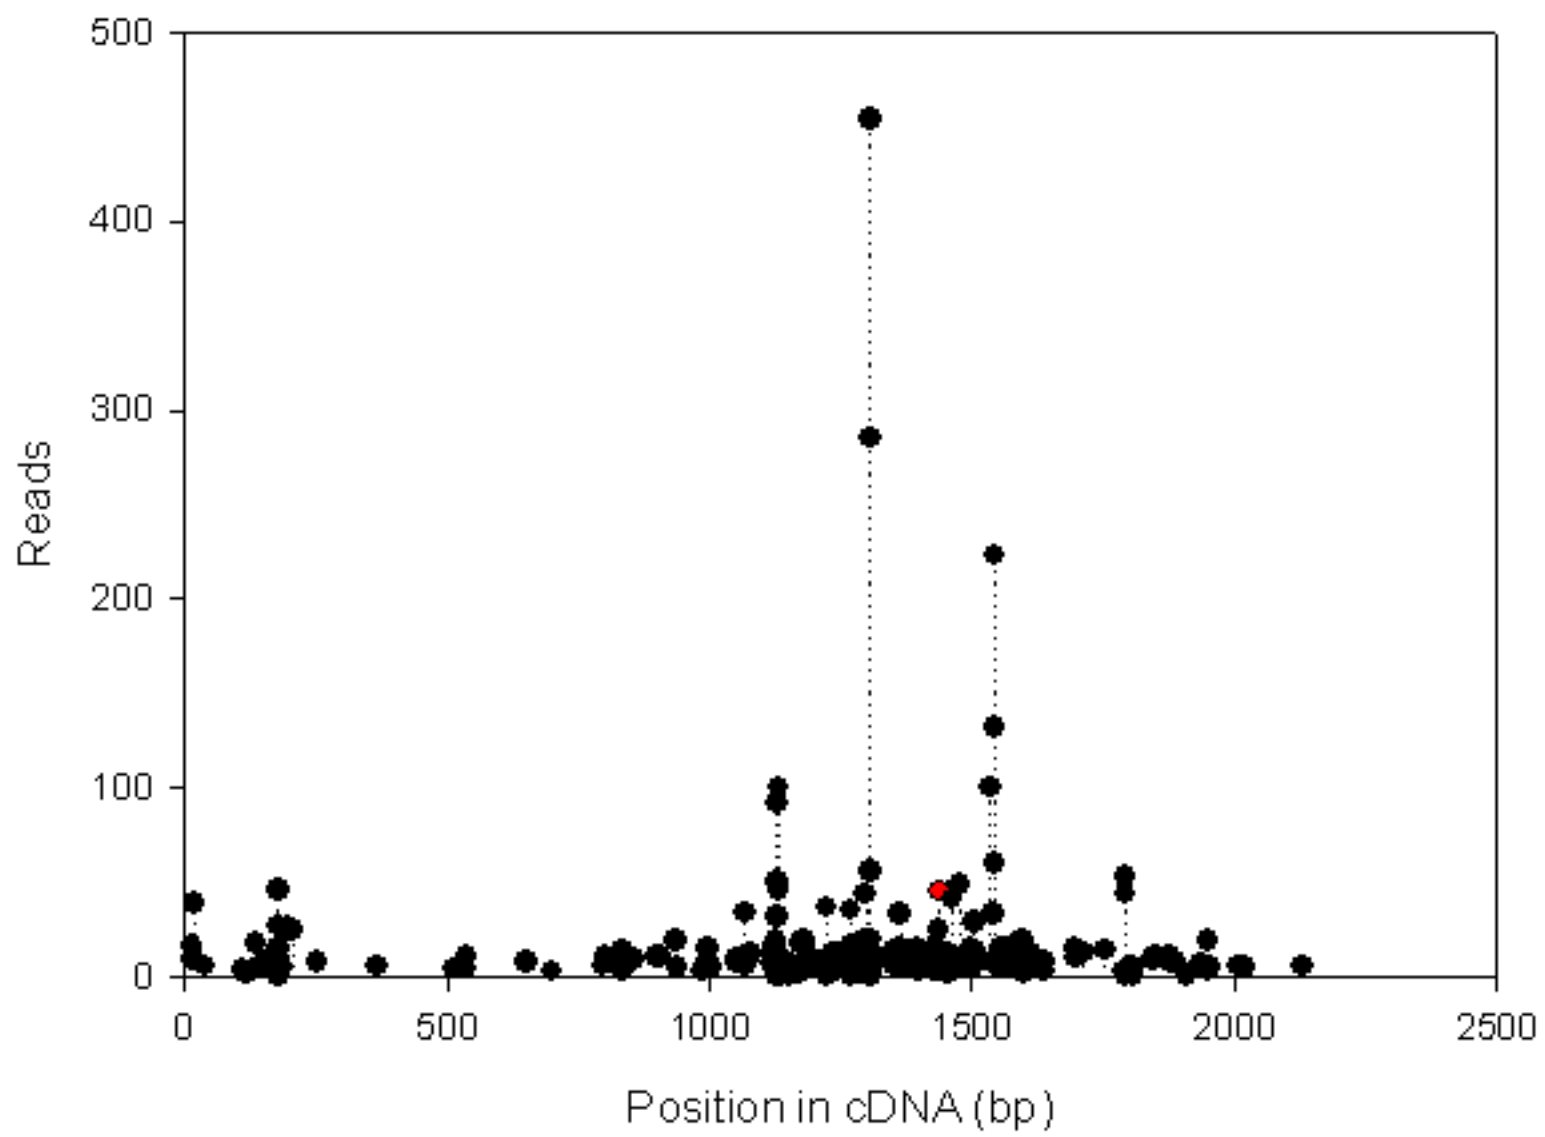

```

5' UCUUUCAUGGCAGCUAUCUUUUGGCA 3'      Cs2g30260.1
   :: ::::: ::: :::::
3' -----GUCCCGUUGAGAGGAAACCGU 5'      Csi-miR399d

```

Csi-miR399e-5p, target=Cs1g02320.1 gene=Cs1g02320  
 Category=3  
 Score=5  
 Cleavage Site=1630

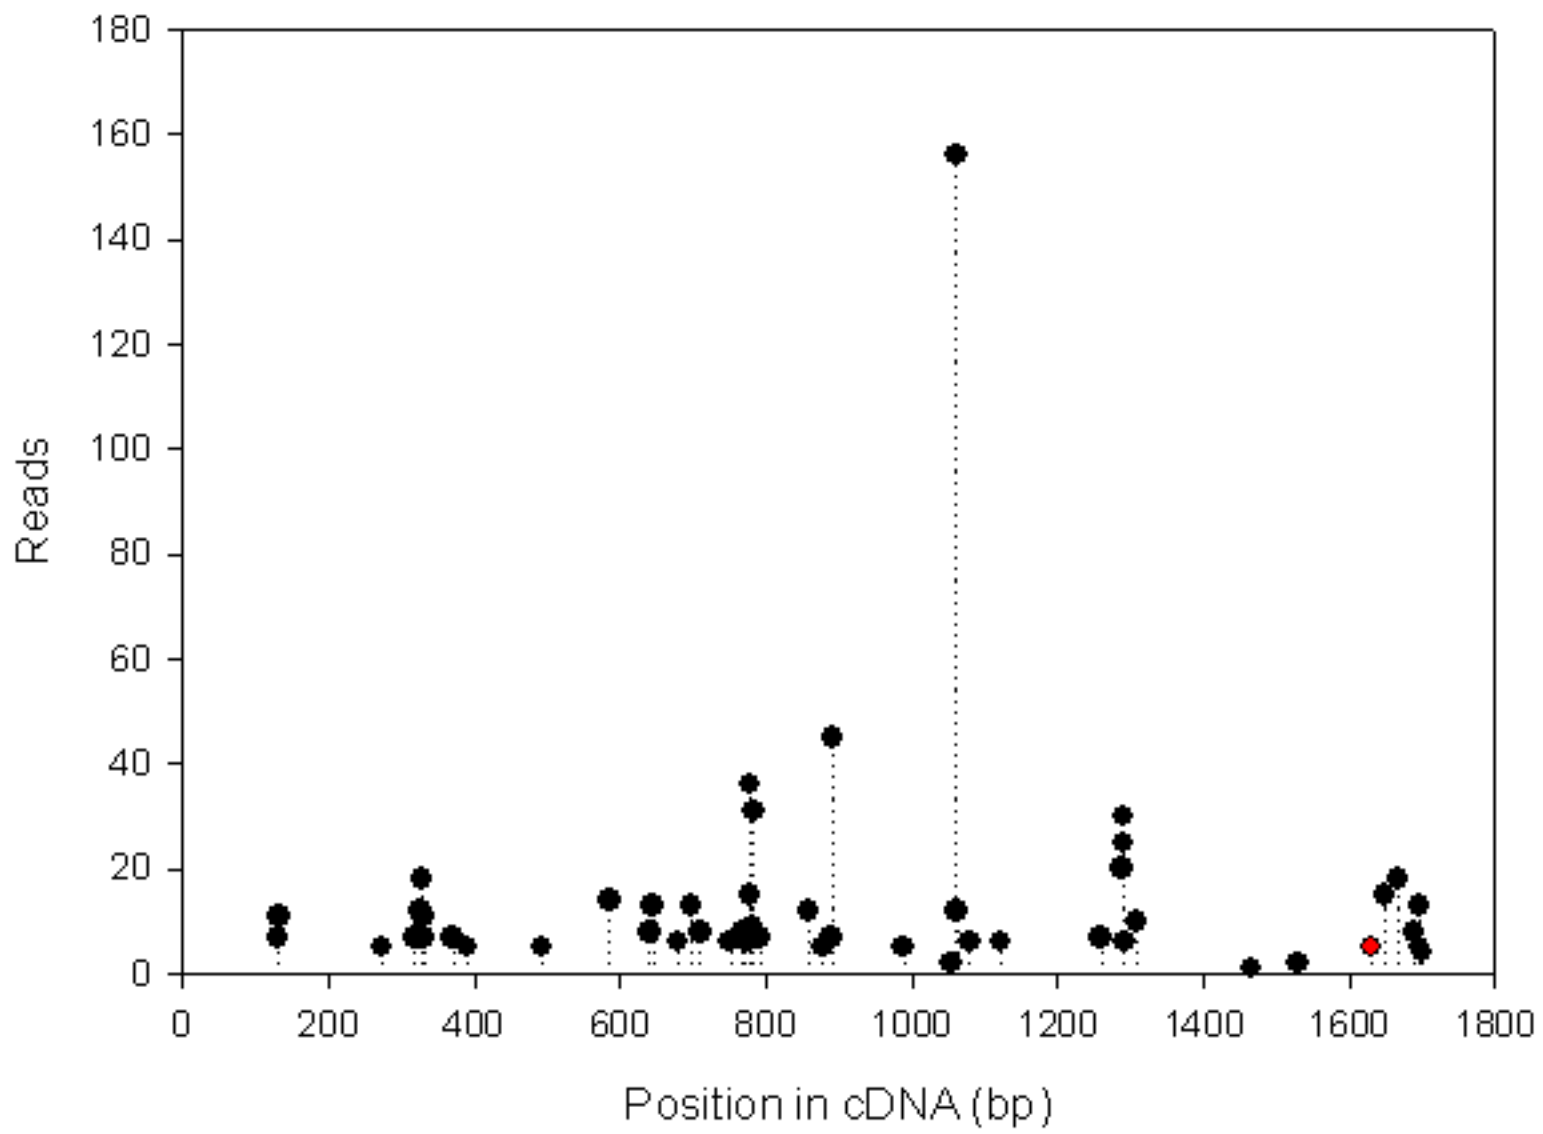

5' UUCUCAUUGGCAAAGGAGGACUACAU 3'  
 :: .: ::::::::::::::: ::.  
 3' ----GU-GCGGUUCCUCCUGACGUG 5'

Cs1g02320.1

Csi-miR399e-5p

Csi-miR403.1, target=Cs2g10760.1 gene=Cs2g10760  
 Category=1  
 Score=0  
 Cleavage Site=3364

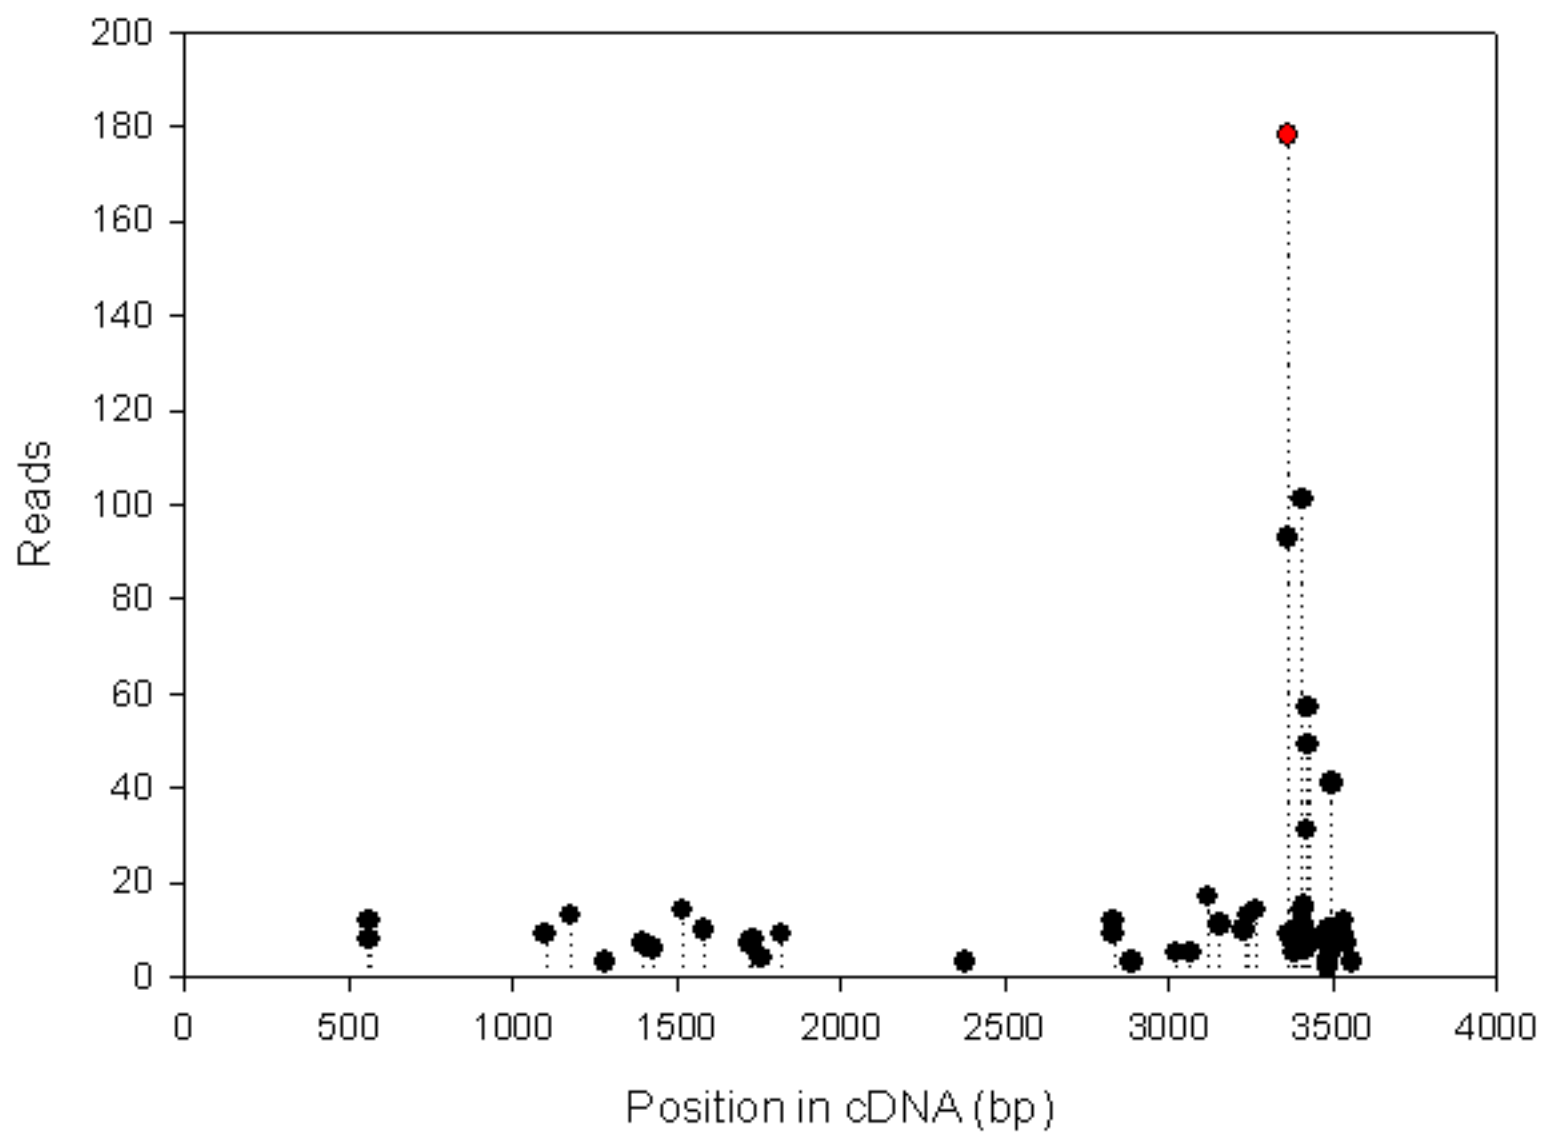

```

5' AGGAGUUUGUGCGUGAAUCUAAUGAG 3'      Cs2g10760.1
   ::::::::::::::::::::
3' ---UCAAACACGCACUUAGAUU--- 5'      Csi-miR403.1
  
```

Csi-miR403.2, target=Cs2g10760.1 gene=Cs2g10760  
 Category=1  
 Score=1  
 Cleavage Site=3364

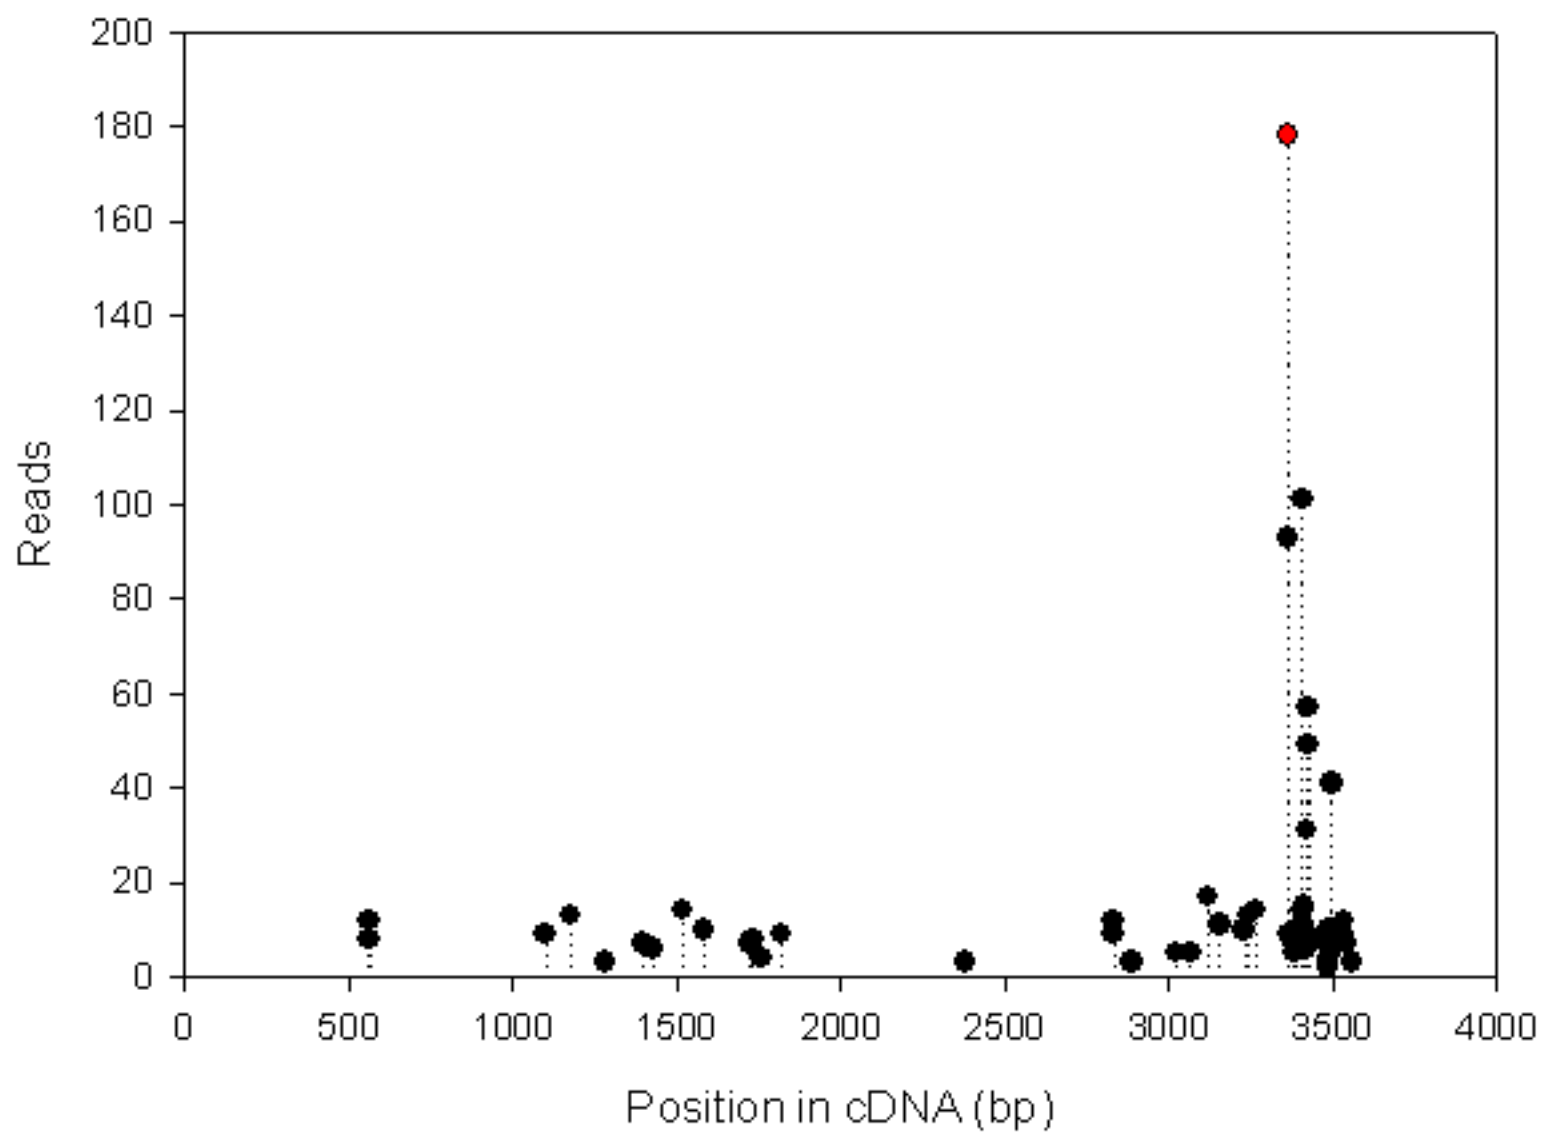

```

5' AGGAGUUUGUGCGUGAAUCUAAUGAG 3'          Cs2g10760.1
   ::::::::::::::::::::::::::::
3' -GCUCAAACACGCACUUAGAUU----- 5'        Csi-miR403.2
  
```

Csi-miR403.3, target=Cs2g10760.1 gene=Cs2g10760  
 Category=1  
 Score=0  
 Cleavage Site=3364



```

5' AGGAGUUUGUGCGUGAAUCUAAUGAG 3'      Cs2g10760.1
      ::::::::::::::::::::
3' ----CAAACACGCACUUAGAUU---- 5'      Csi-miR403.3
  
```

Csi-miR403.3, target=Cs8g07240.1 gene=Cs8g07240  
 Category:3  
 Score=5  
 Cleavage Site=532

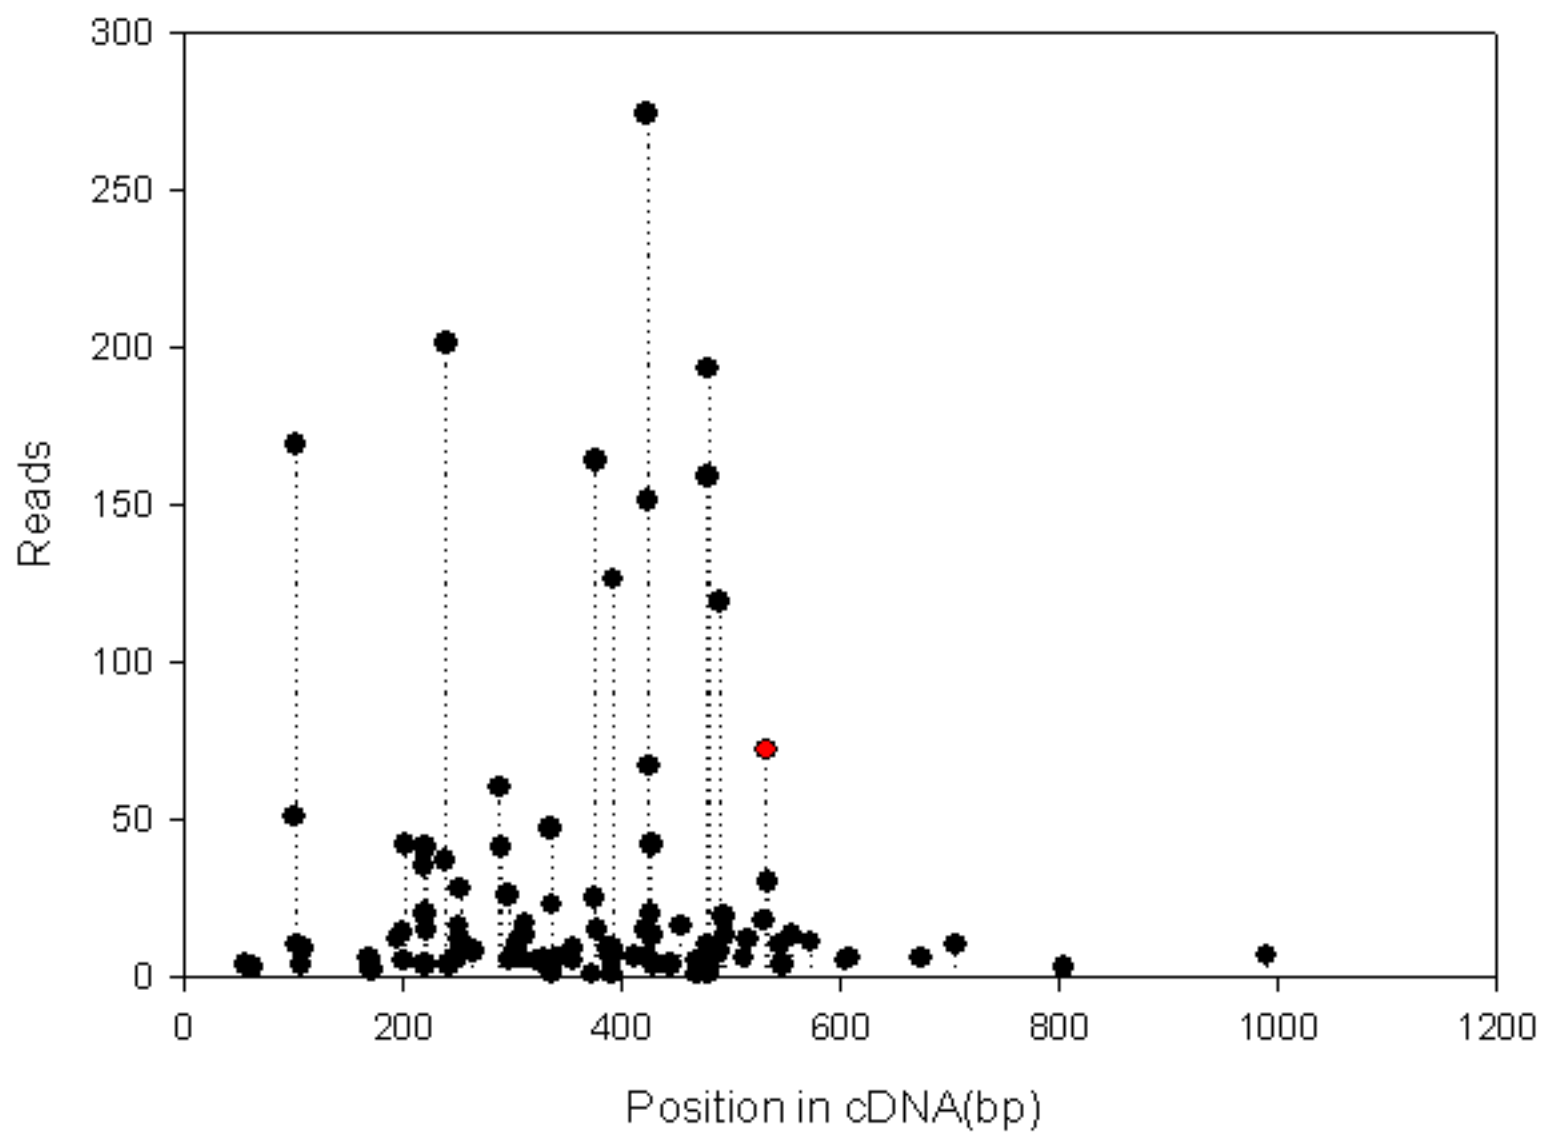

```

5' UUGUUUCU-UGUGAAUCUAUUUGAGAG 3'      Cs8g07240.1
   : : : : : : : : : : : : : : : :
3' --CAAACACGCACUUAGAUU----- 5'      Csi-miR403.3

```

Csi-miR408.1, target=Cs2g13550.1 gene=Cs2g13550  
 Category=3  
 Score=5  
 Cleavage Site=1964

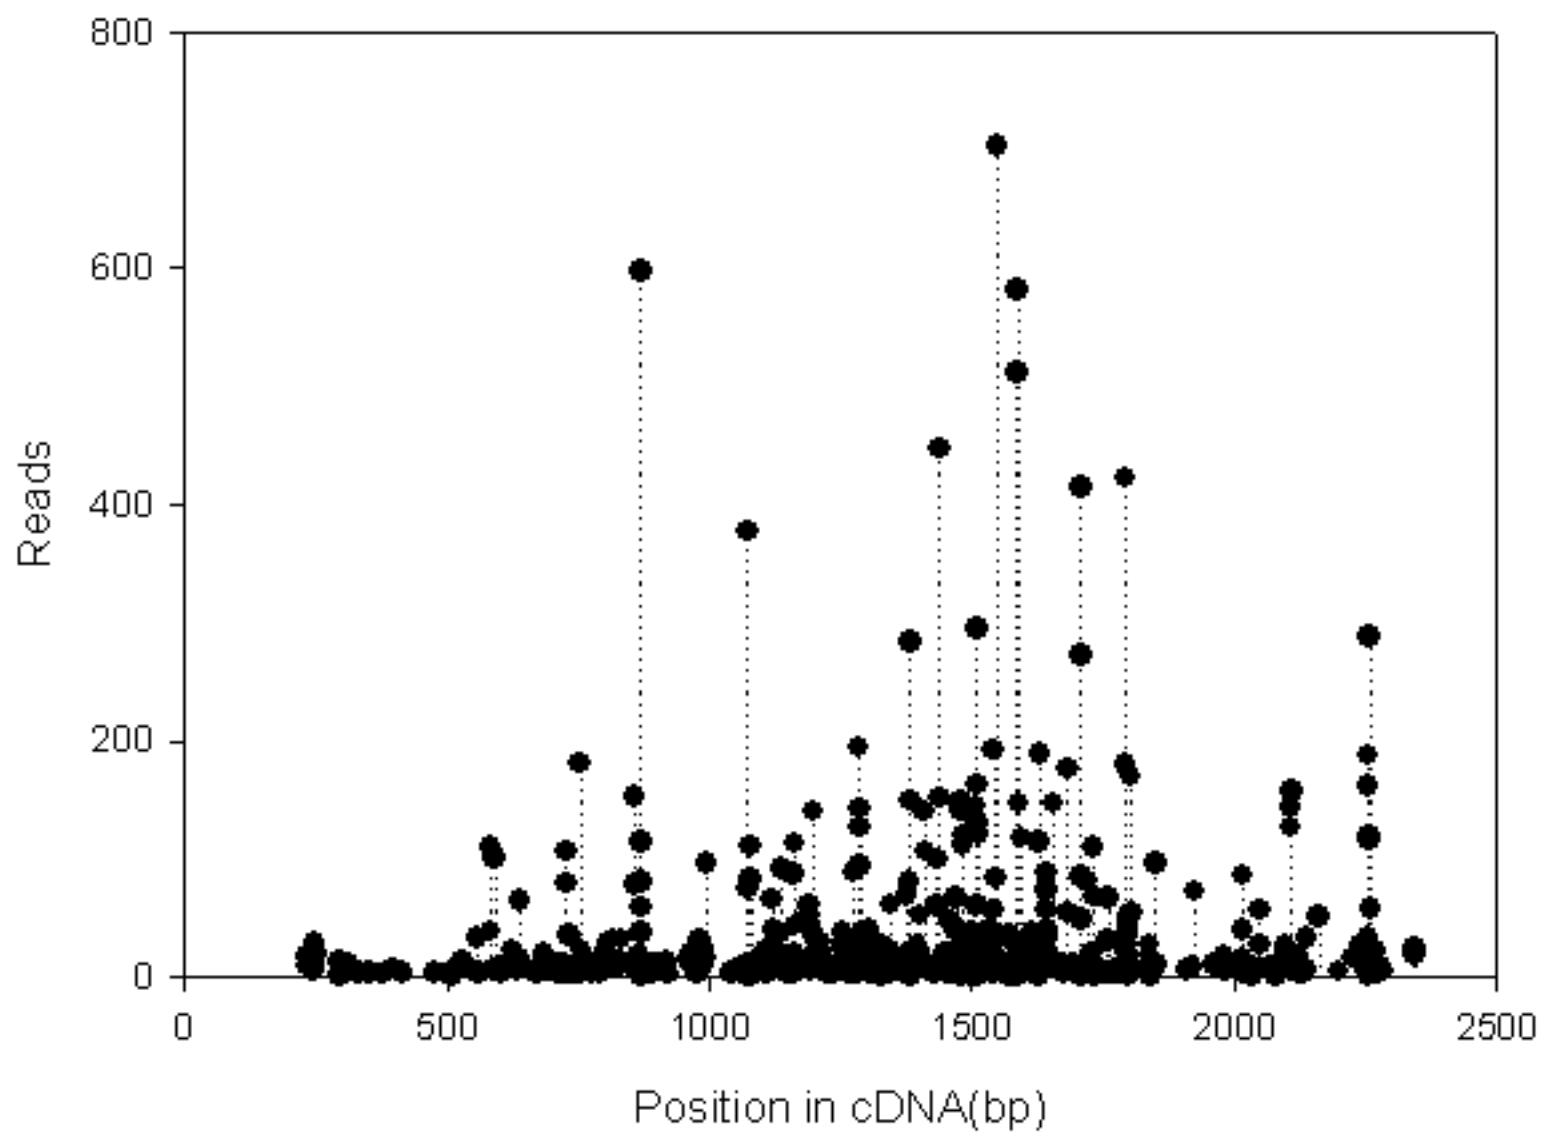

```

5'  CUCAUGCUC-GUCUCUUCCCUGUCCU 3'      Cs2g13550.1
      :::::  .:::  :::::
3'  --GUACGAGACGGACAAGGGGCA---- 5'      Csi-miR408.1
  
```

Csi-miR408.2, target=Cs6g02740.1 gene=Cs6g02740  
 Category=3  
 Score=5  
 Cleavage Site=1532

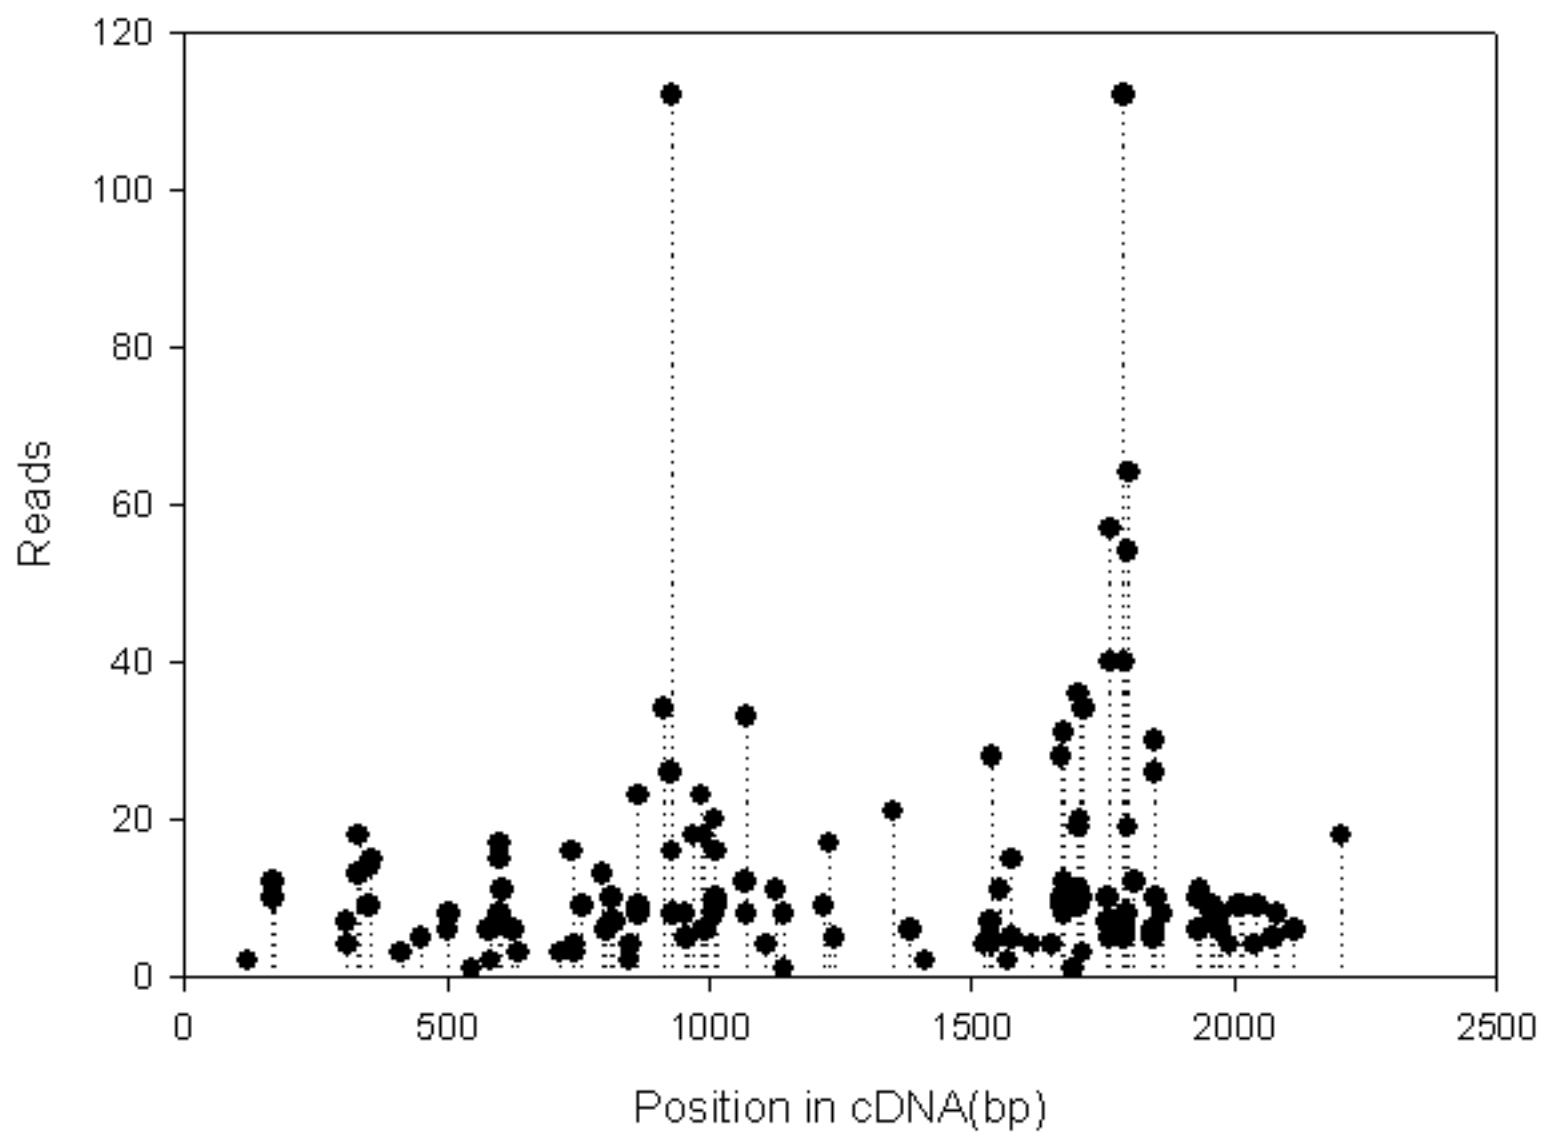

```

5' GCUGUGGUAUGCCUGUCCUUGACUC 3'      Cs6g02740.1
   : : : : : : : : : : : : : : : :
3' -GGUACGAGACGGACAAGGGGC----- 5'   Csi-miR408.2
  
```



Csi-miR4414.2, target=Cs3g26540.1 gene=Cs3g26540  
 Category=1  
 Score=5  
 Cleavage Site=736

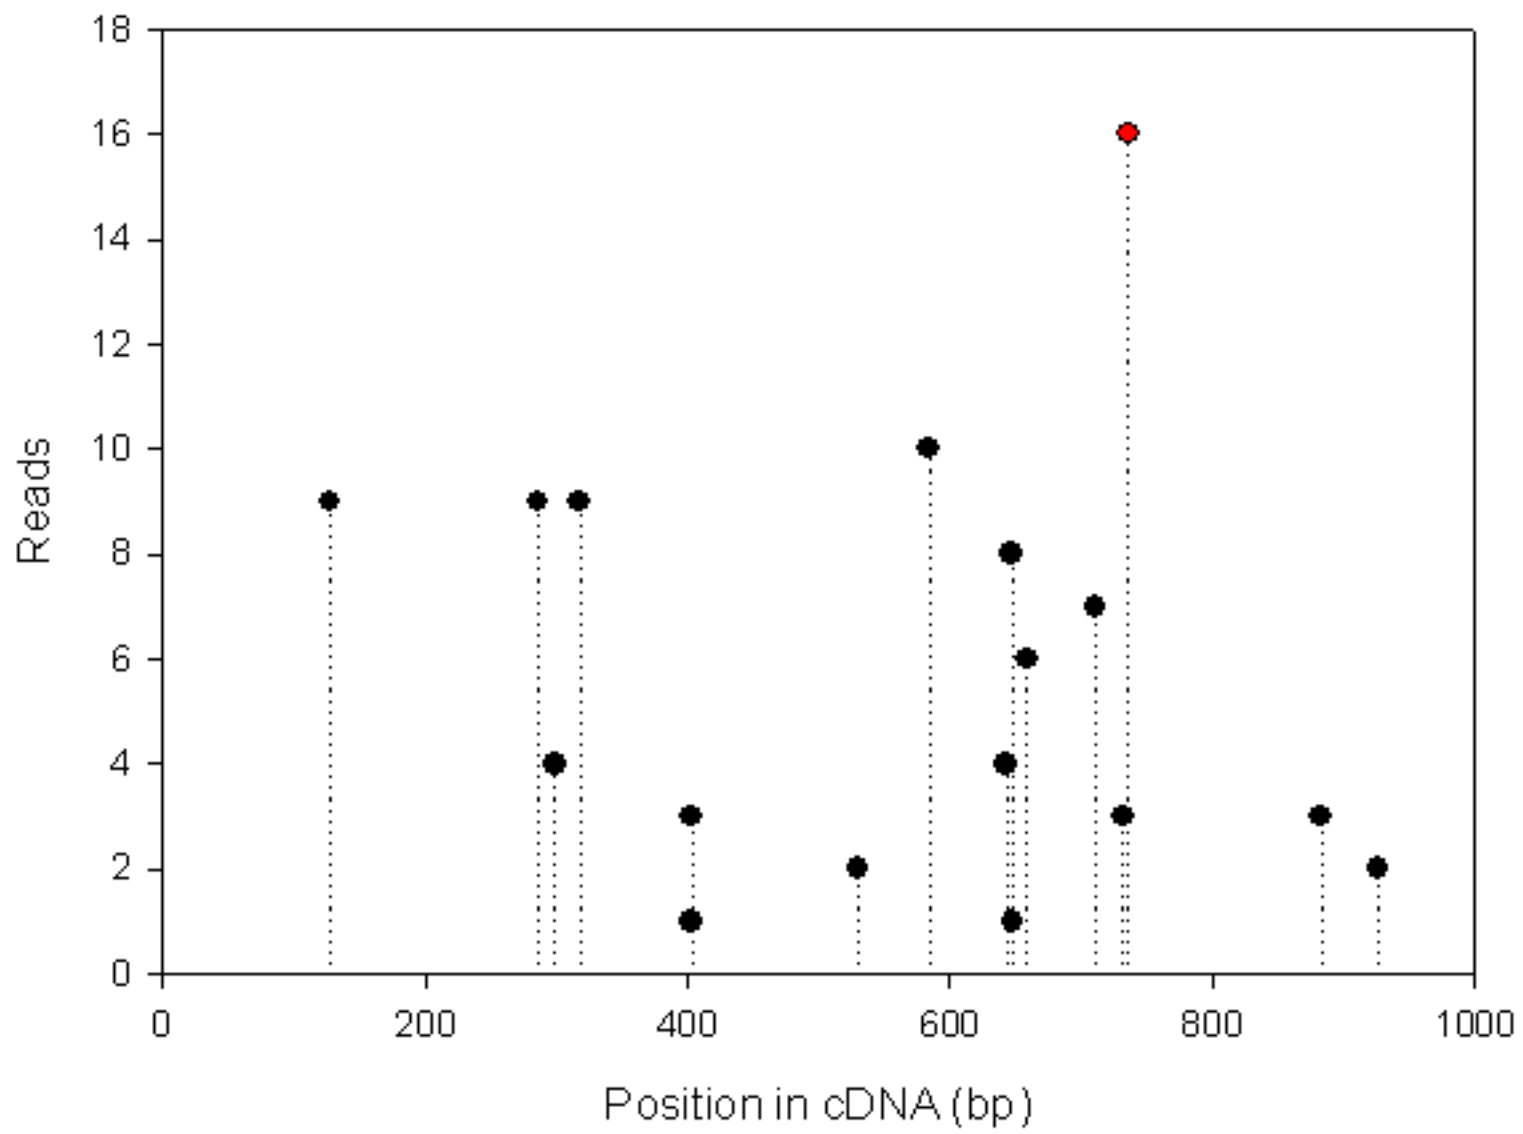

```

5' AGAAUCGA-GAGUCAGCCGCUCGCUCC 3'      Cs3g26540.1
   : : : : : : : : : : : : : : : : :
3' -CUUGGUUGCUCAGUCGUCGA----- 5'      csi-miR4414.2
  
```

Csi-miR4414.2, target=Orange1.1t02428.1 gene=Orange1.1t02428  
 Category:1  
 Score=4.5  
 Cleavage Site=58

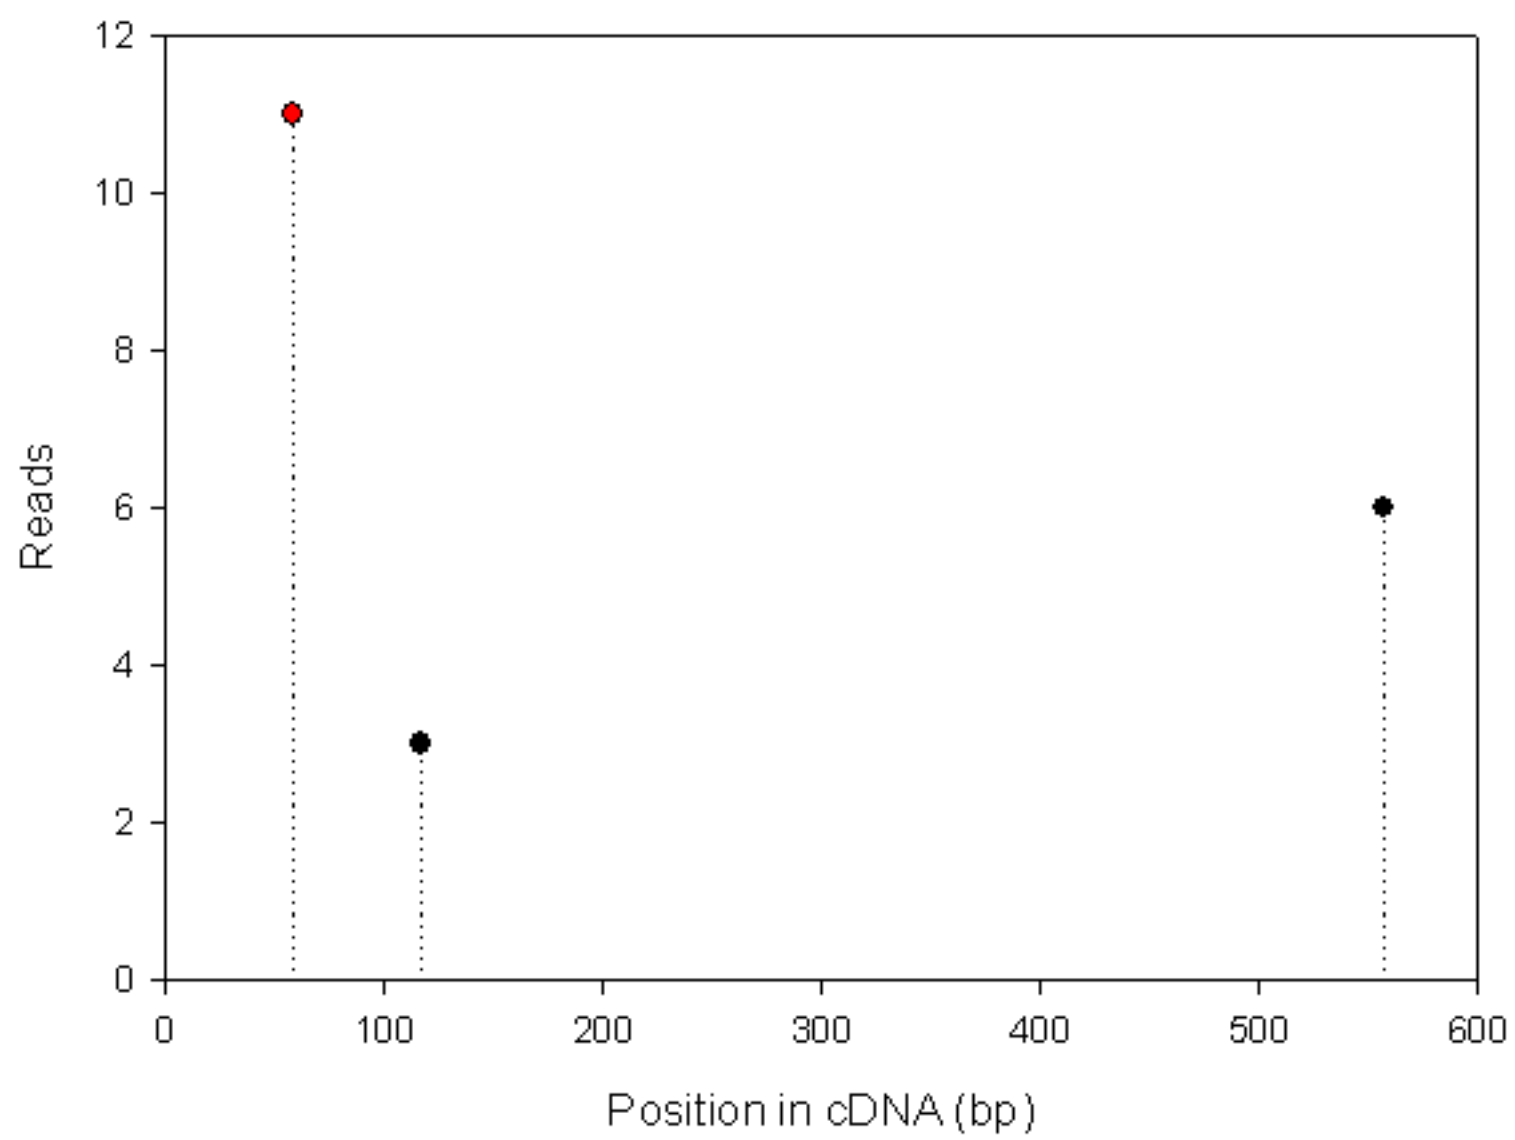

5' CCUACAACUACUGAGUCAGCAGCCAA 3'  
 .....  
 3' ----CUUGGUUGCUCAGUCGUCGA-- 5'

Orange1.1t02428.1

Csi-miR4414.2

Csi-miR444a.1, target=Orange1.1t02003.1 gene=Orange1.1t02003  
 Category=2  
 Score=4  
 Cleavage Site=545

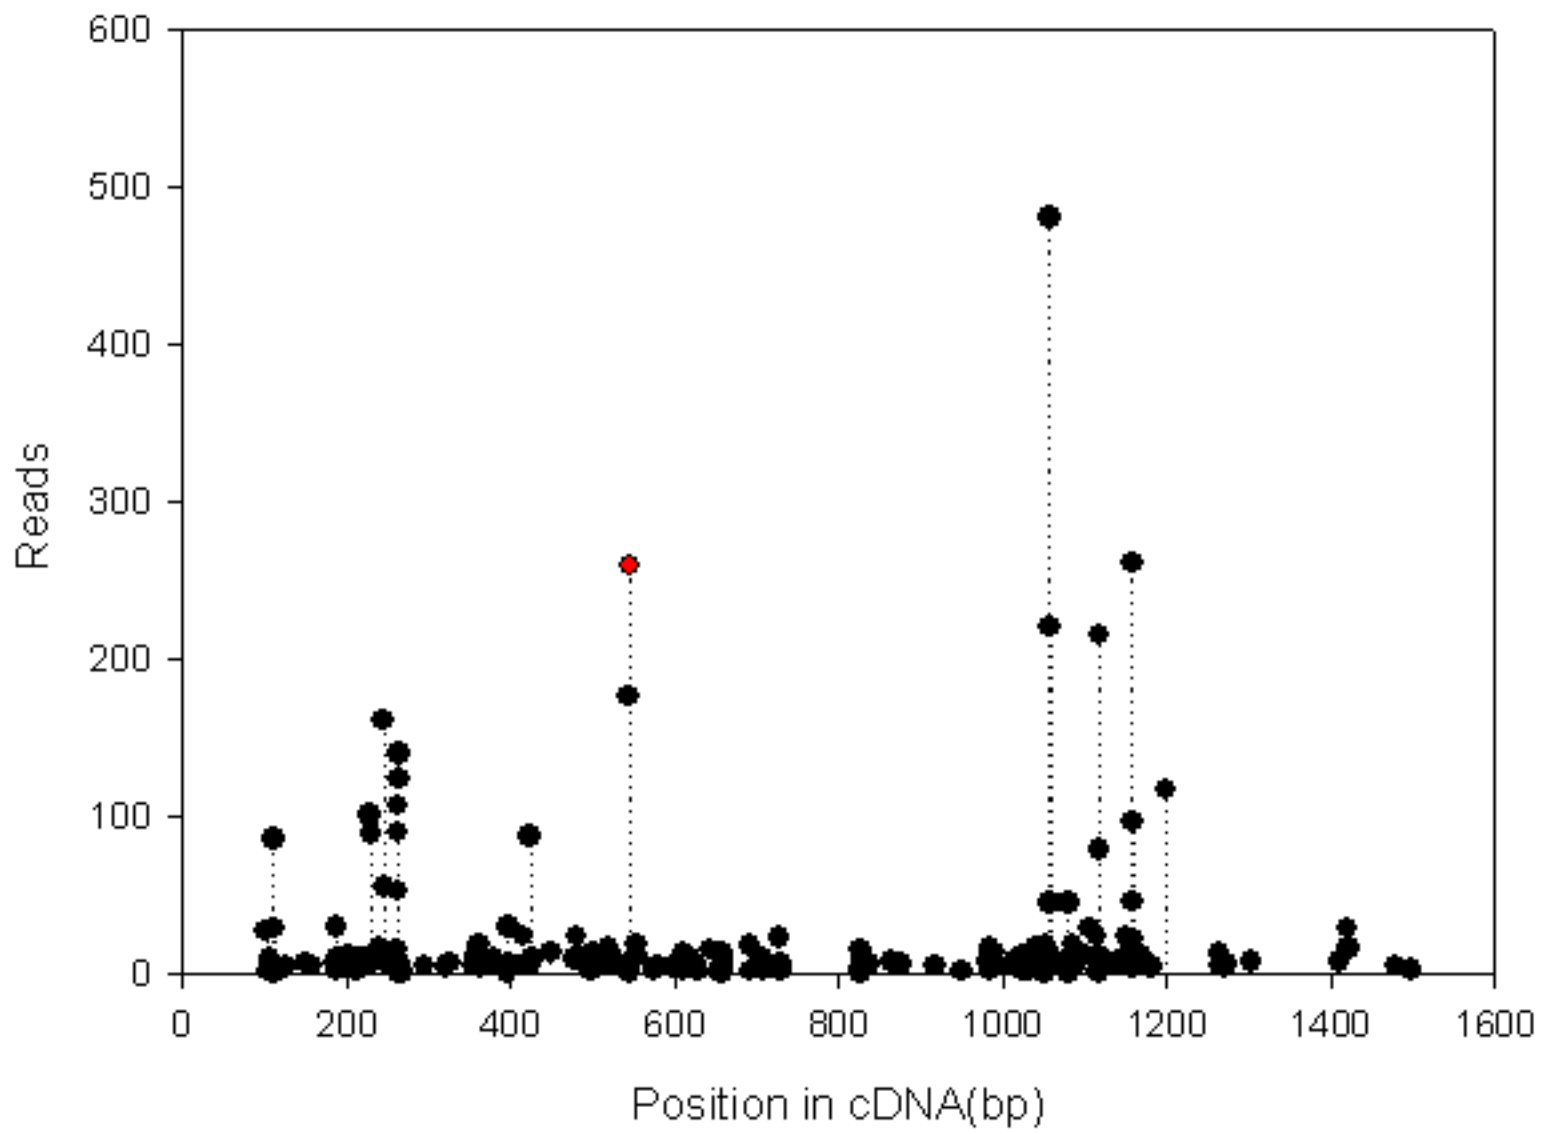

|                                                                                                                                                                                             |                   |
|---------------------------------------------------------------------------------------------------------------------------------------------------------------------------------------------|-------------------|
| 5' UUGC <span style="text-decoration: underline;">U</span> GC <span style="text-decoration: underline;">U</span> U <span style="text-decoration: underline;">G</span> UC-CAAGAAAGUAAC 3'    | Orange1.1t02003.1 |
| ::: :: :<br>::: :: :<br>::: :: :<br>::: :: :<br>::: :: :<br>::: :: :<br>::: :: :                                                                                                            |                   |
| 3' -ACGUACA <span style="text-decoration: underline;">A</span> AA <span style="text-decoration: underline;">A</span> CAGAGUUCU <span style="text-decoration: underline;">U</span> U----- 5' | Csi-miR444a.1     |

Csi-miR472, target=Cs7g26730.1 gene=Cs7g26730  
 Category=3  
 Score=3  
 Cleavage Site=1411

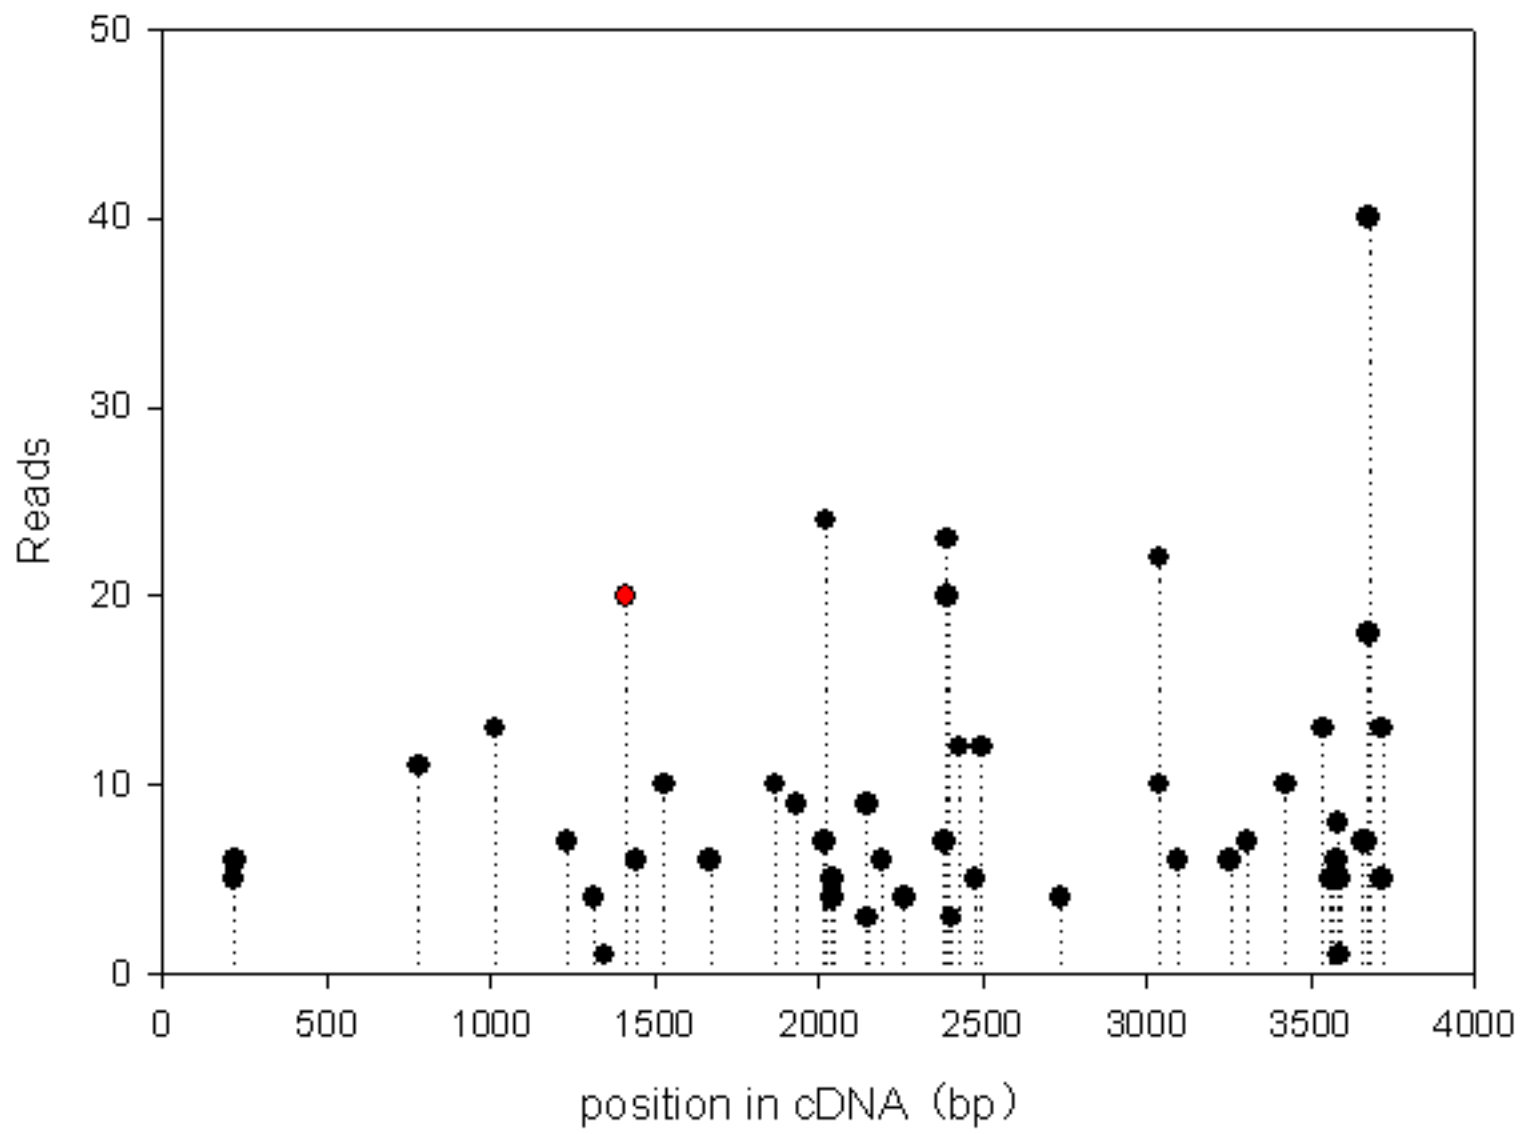

```

5' GAGAAGAGAGGUGUGGGAAAAUGCAA 3'      Cs7g26730.1
   :  :  :  :  :  :  :  :  :  :  :
3' CCCUACCCUCCACACCCUUUU----- 5'      Csi-miR472

```

Csi-miR473-3p, target=Orange1.1t02213.1 gene=Orange1.1t02213  
 Category=3  
 Score=4  
 Cleavage Site=534

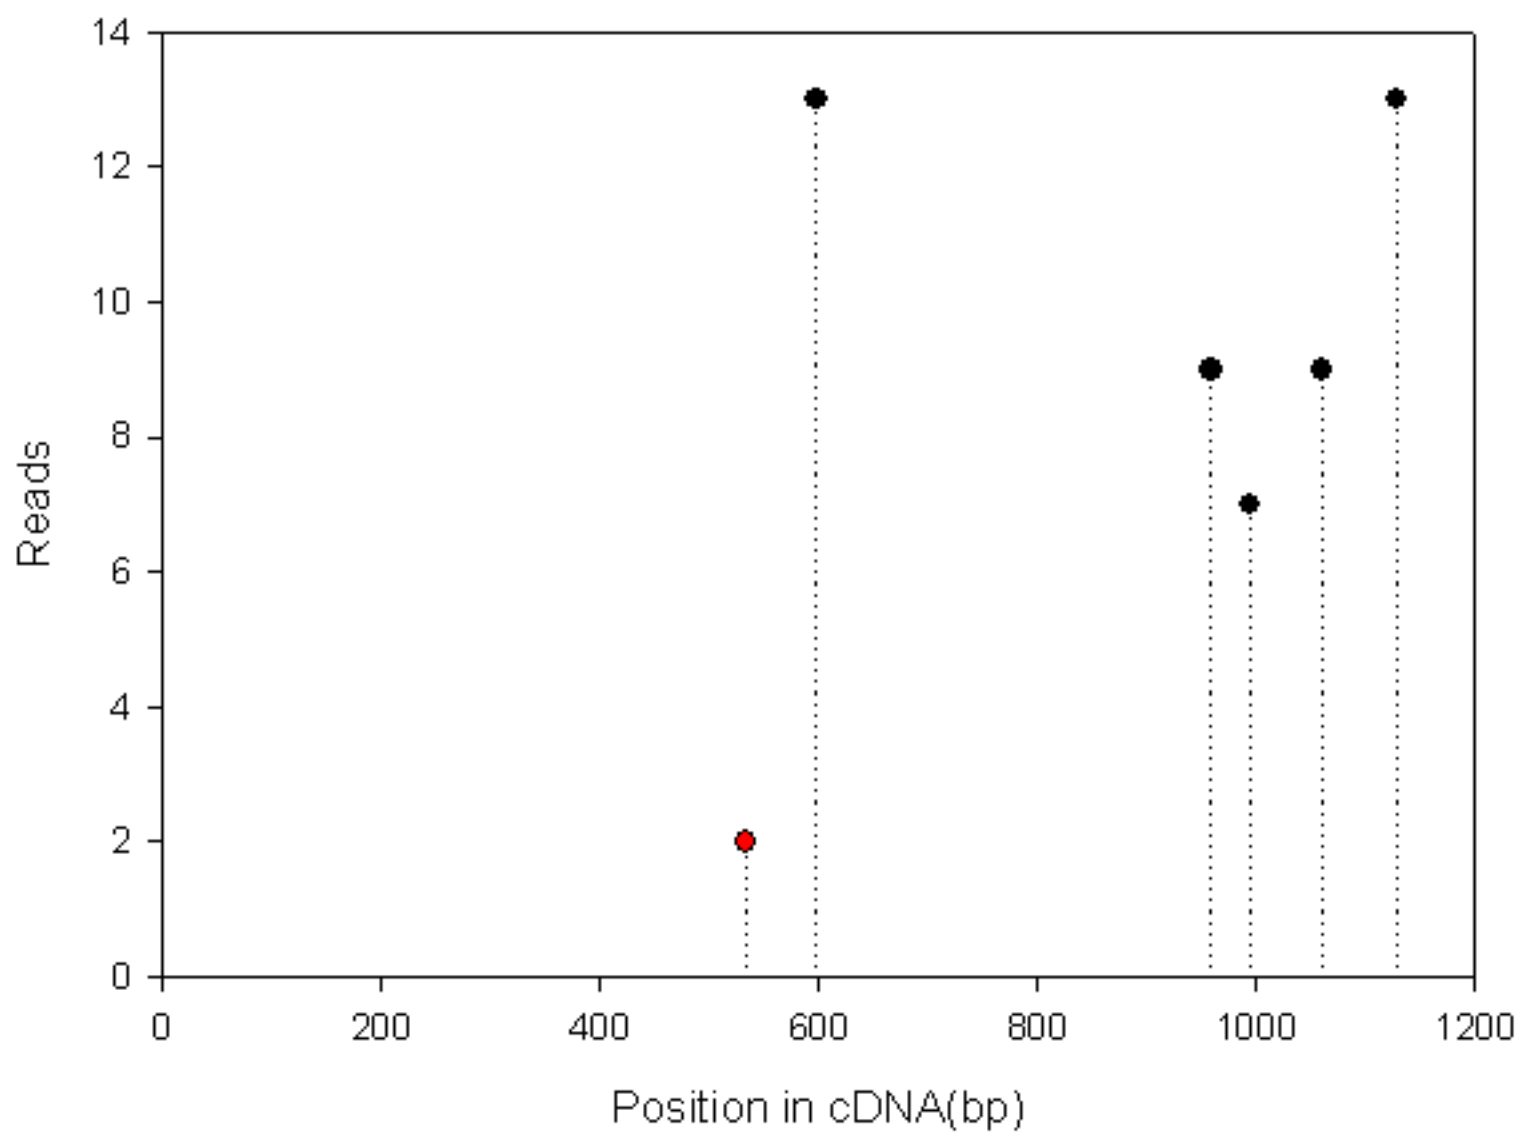

```

5' GUCUGUCA-UCAACUUCGAGGACUUCA 3'      Orange1.1t02213.1
   ::: .....
3' -----AGUGAGUUGGGGUUCCUGAAG- 5'      csi-miR473-3p
  
```

Csi-miR477a-3p, target=Cs7g09520.1 gene=Cs7g09520  
 Category=2  
 Score=5  
 Cleavage Site=463

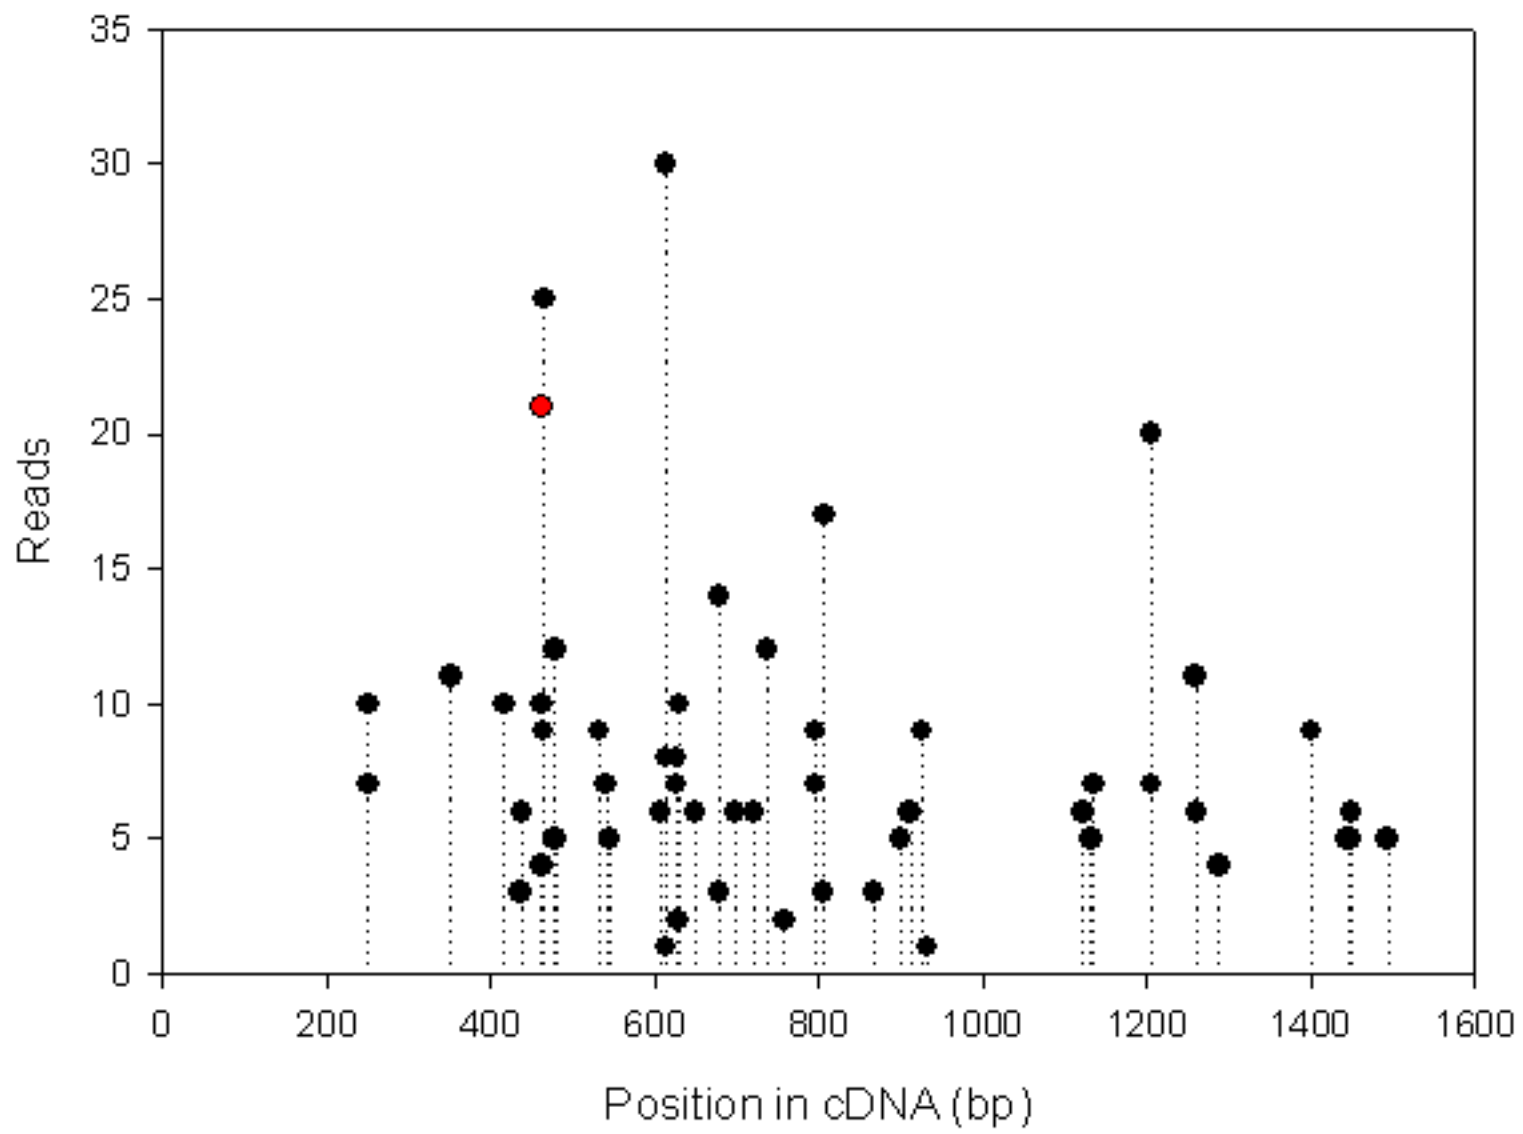

```

5' GGUCCACCUCCUAGGGUUUCGGAUUU 3'      Cs7g09520.1
   :  :  :  :  :  :  :  :  :  :  :
3' GCUGGAGGGGGGAUCCCAAAGG----- 5'    Csi-miR477a-3p
  
```

Csi-miR477b.2, target=Cs8g17030.1 gene=Cs8g17030  
 Category=3  
 Score=5  
 Cleavage Site=373

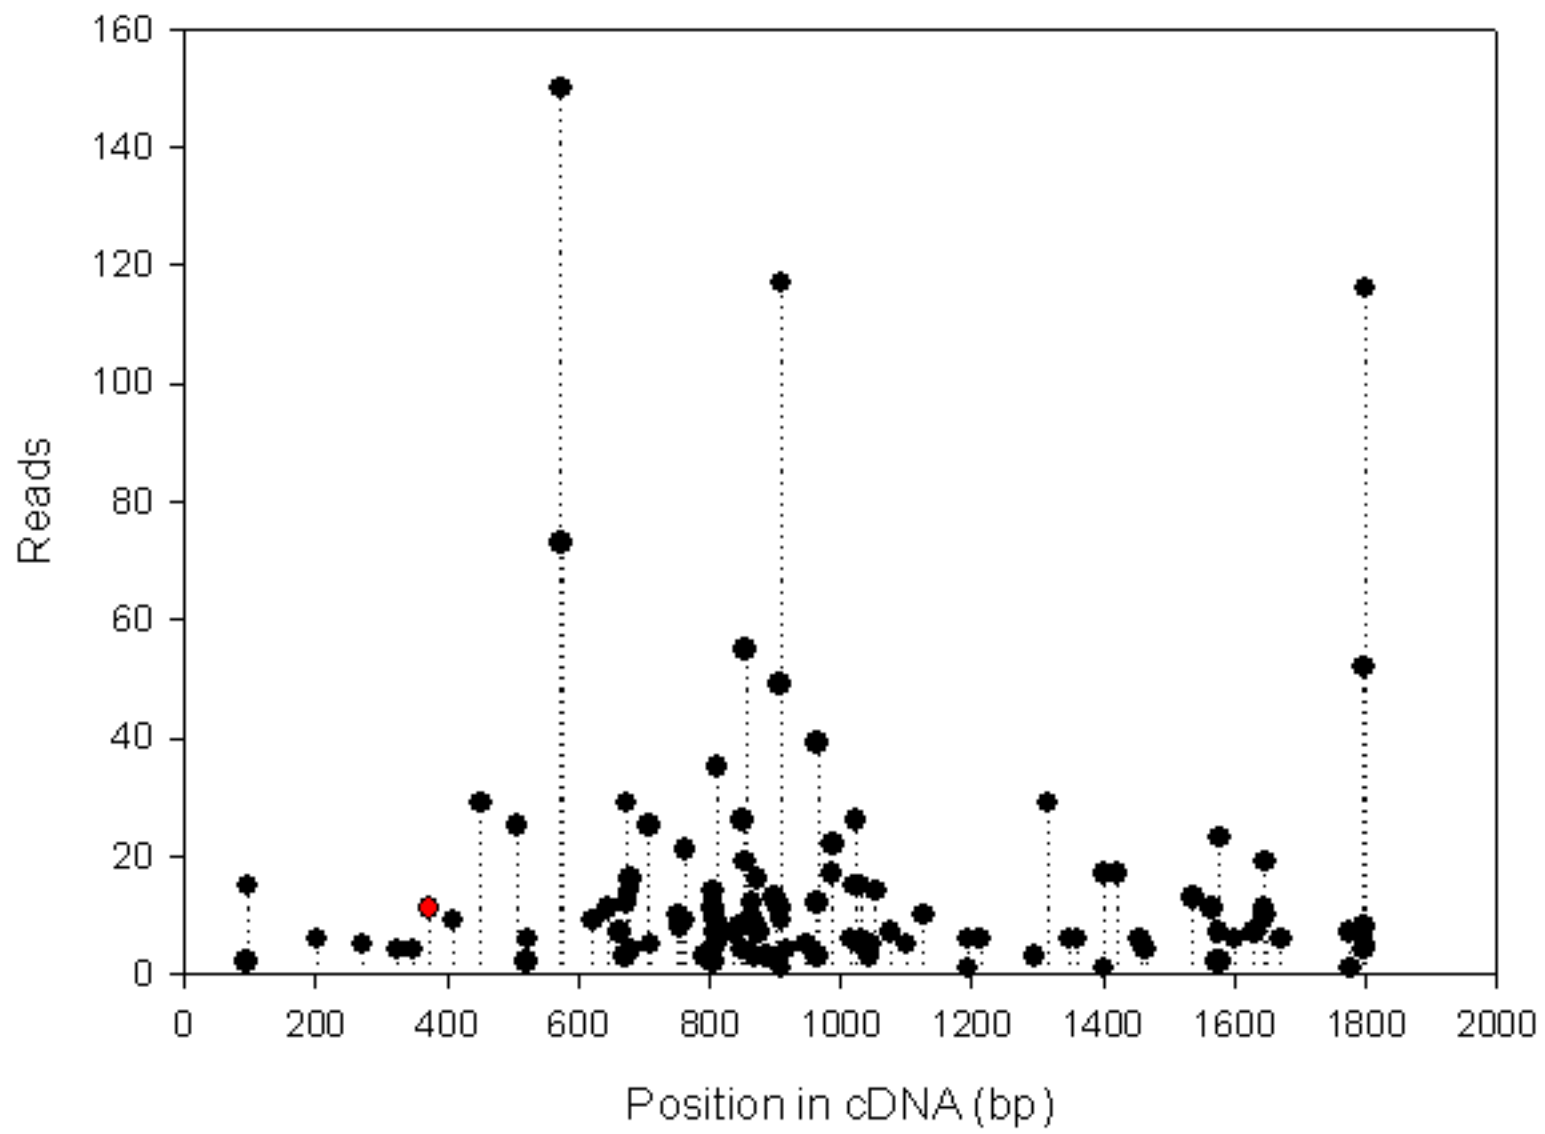

5' UGUGAGGAGUCCUGGAGGGAGAAUUU 3'  
 ::::::::::: ::::::::::: :  
 3' ---CUCUUCGGGAACUCCCUCUCA-- 5'

Cs8g17030.1

Csi-miR477b.2

Csi-miR477d.1-3p, target=Cs2g02350.1 gene=Cs2g02350  
 Category=3  
 Score=5  
 Cleavage Site=67

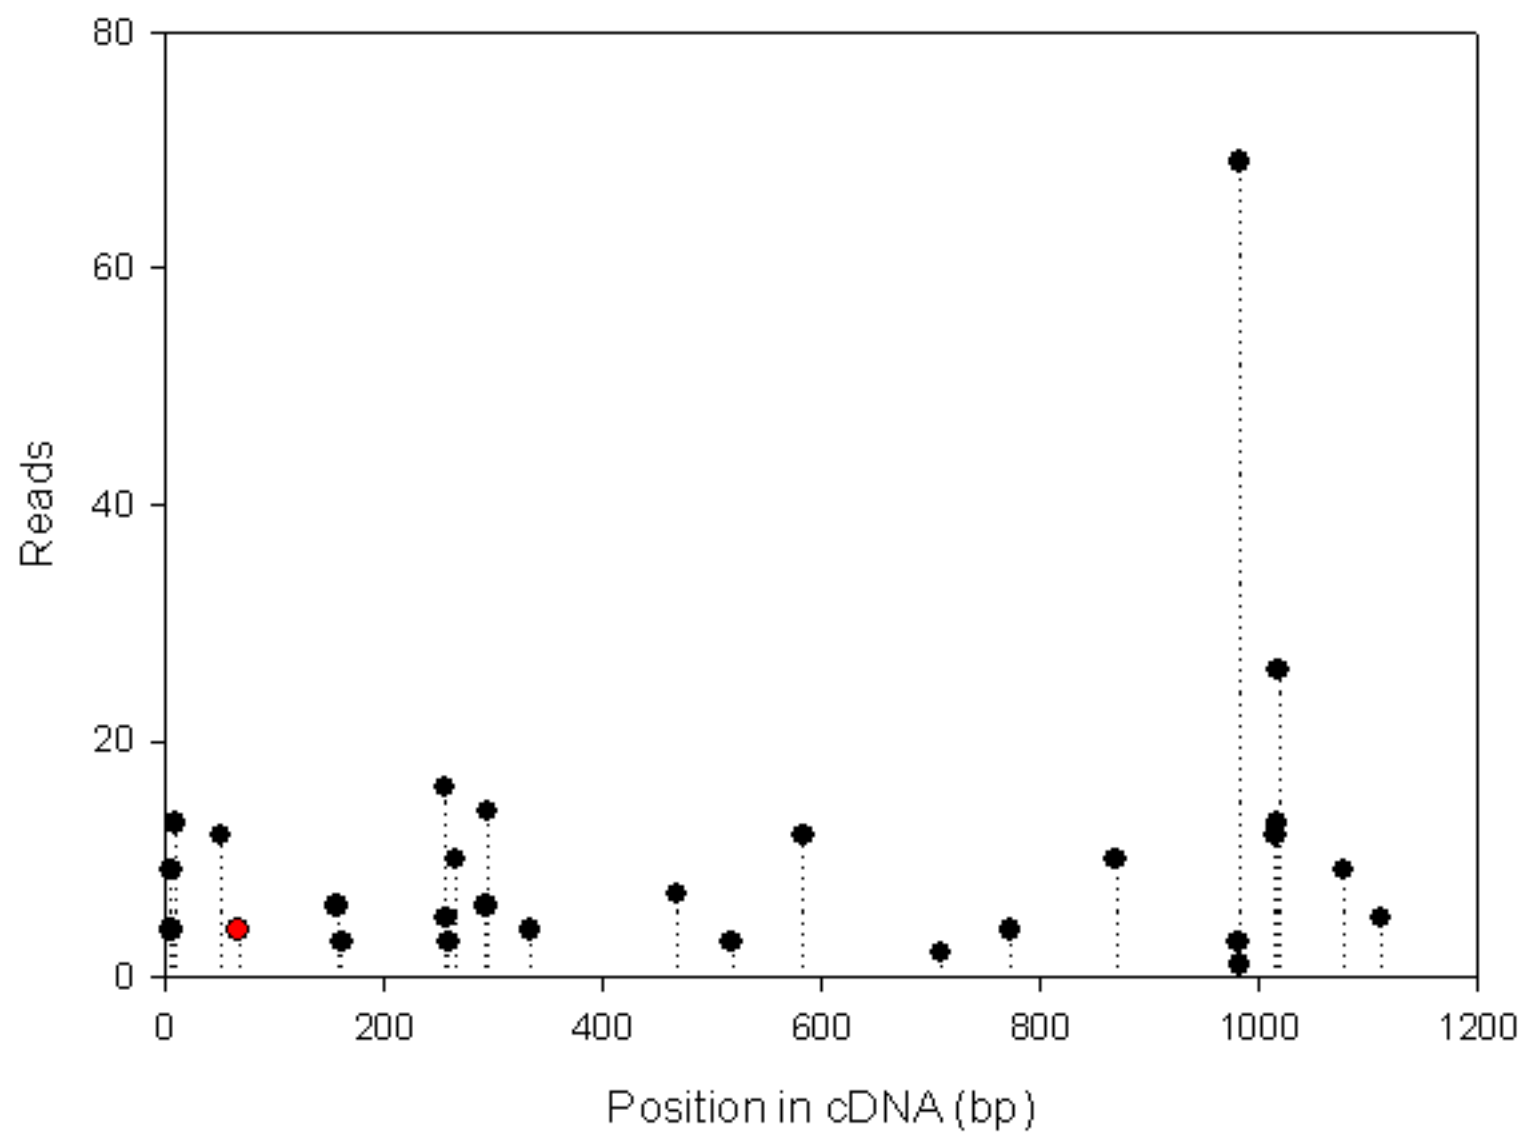

5' AACCACUUCACUUCAACGGCUUCAAA 3'  
 :::: :: :..:::::::::::  
 3' --GGUG-AGAGGGGUUGCCGGAGU-- 5'

Cs2g02350.1

Csi-miR477d.1-3p



Csi-miR477d.2-5p, target=Cs3g10900.1 gene=Cs3g10900  
 Category=3  
 Score=3.5  
 Cleavage Site=1314

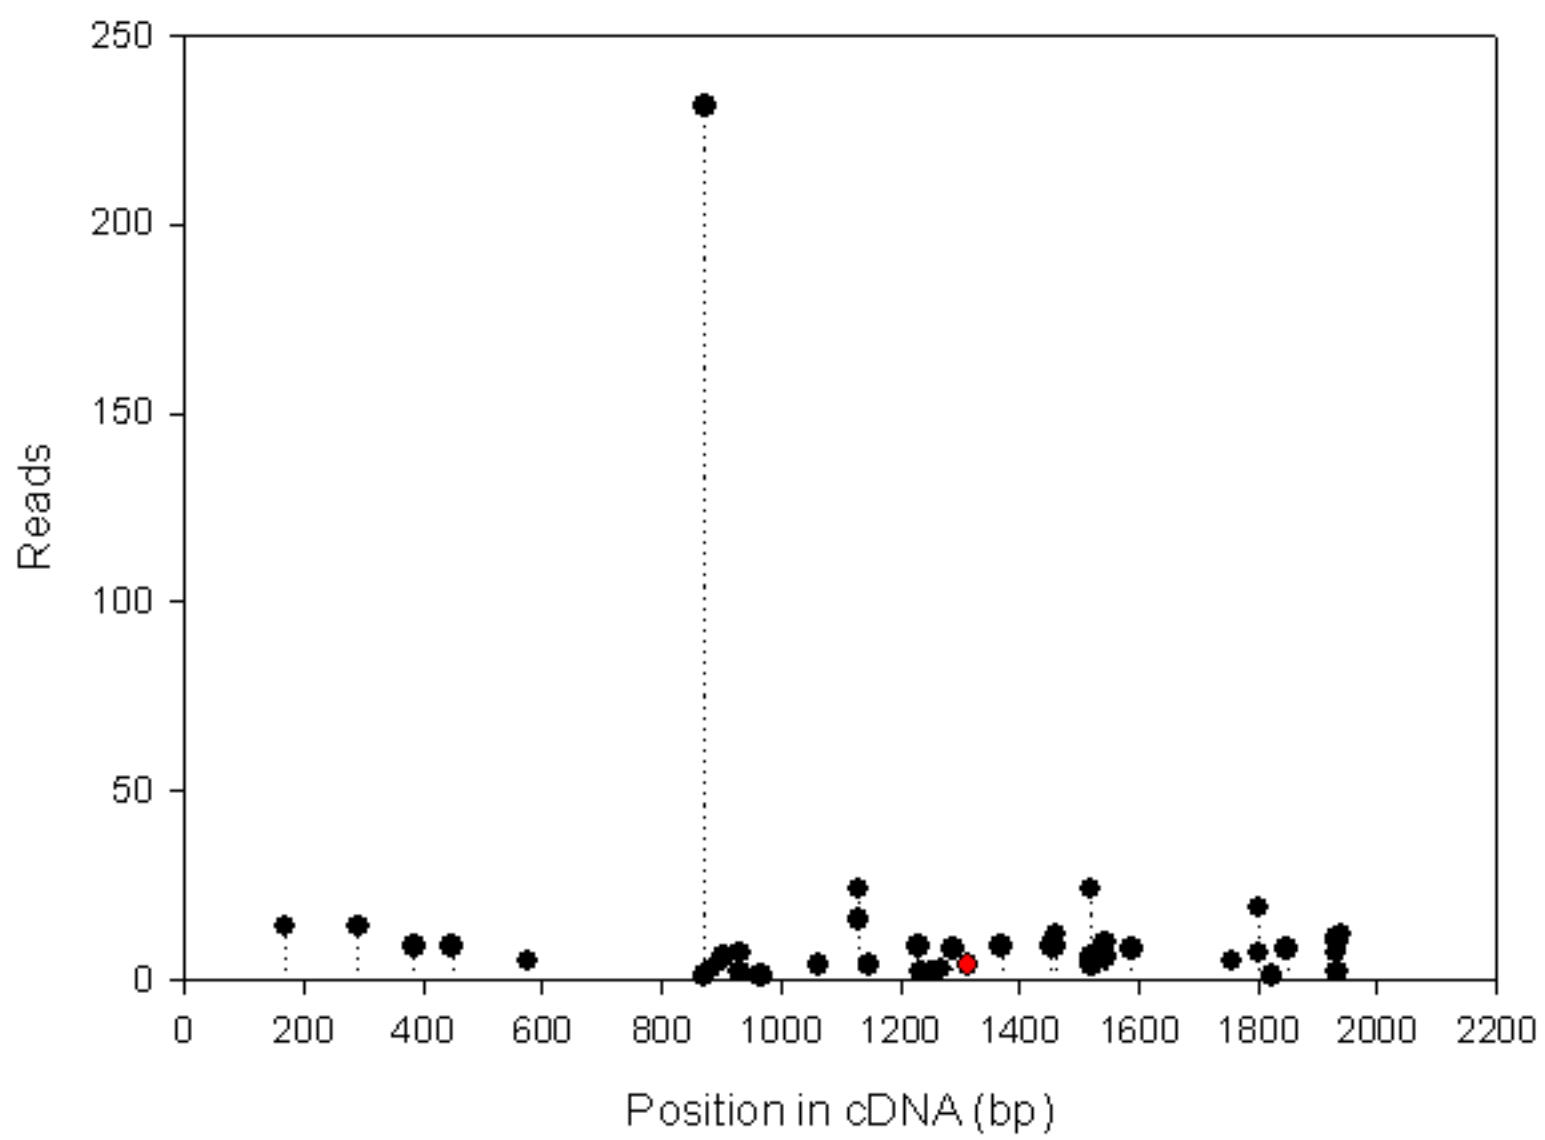

|                                  |                  |
|----------------------------------|------------------|
| 5' UCUGUCAUCAGCUCUUGAGGGAGAGA 3' | Cs3g10900.1      |
| :::  :::.:::~::~:                |                  |
| 3' ----AGUCUUCGGGAACUCCCUCUCA 5' | Csi-miR477d.2-5p |

Csi-miR479.1, target=Cs5g24810.1 gene=Cs5g24810  
 Category=3  
 Score=5  
 Cleavage Site=4314

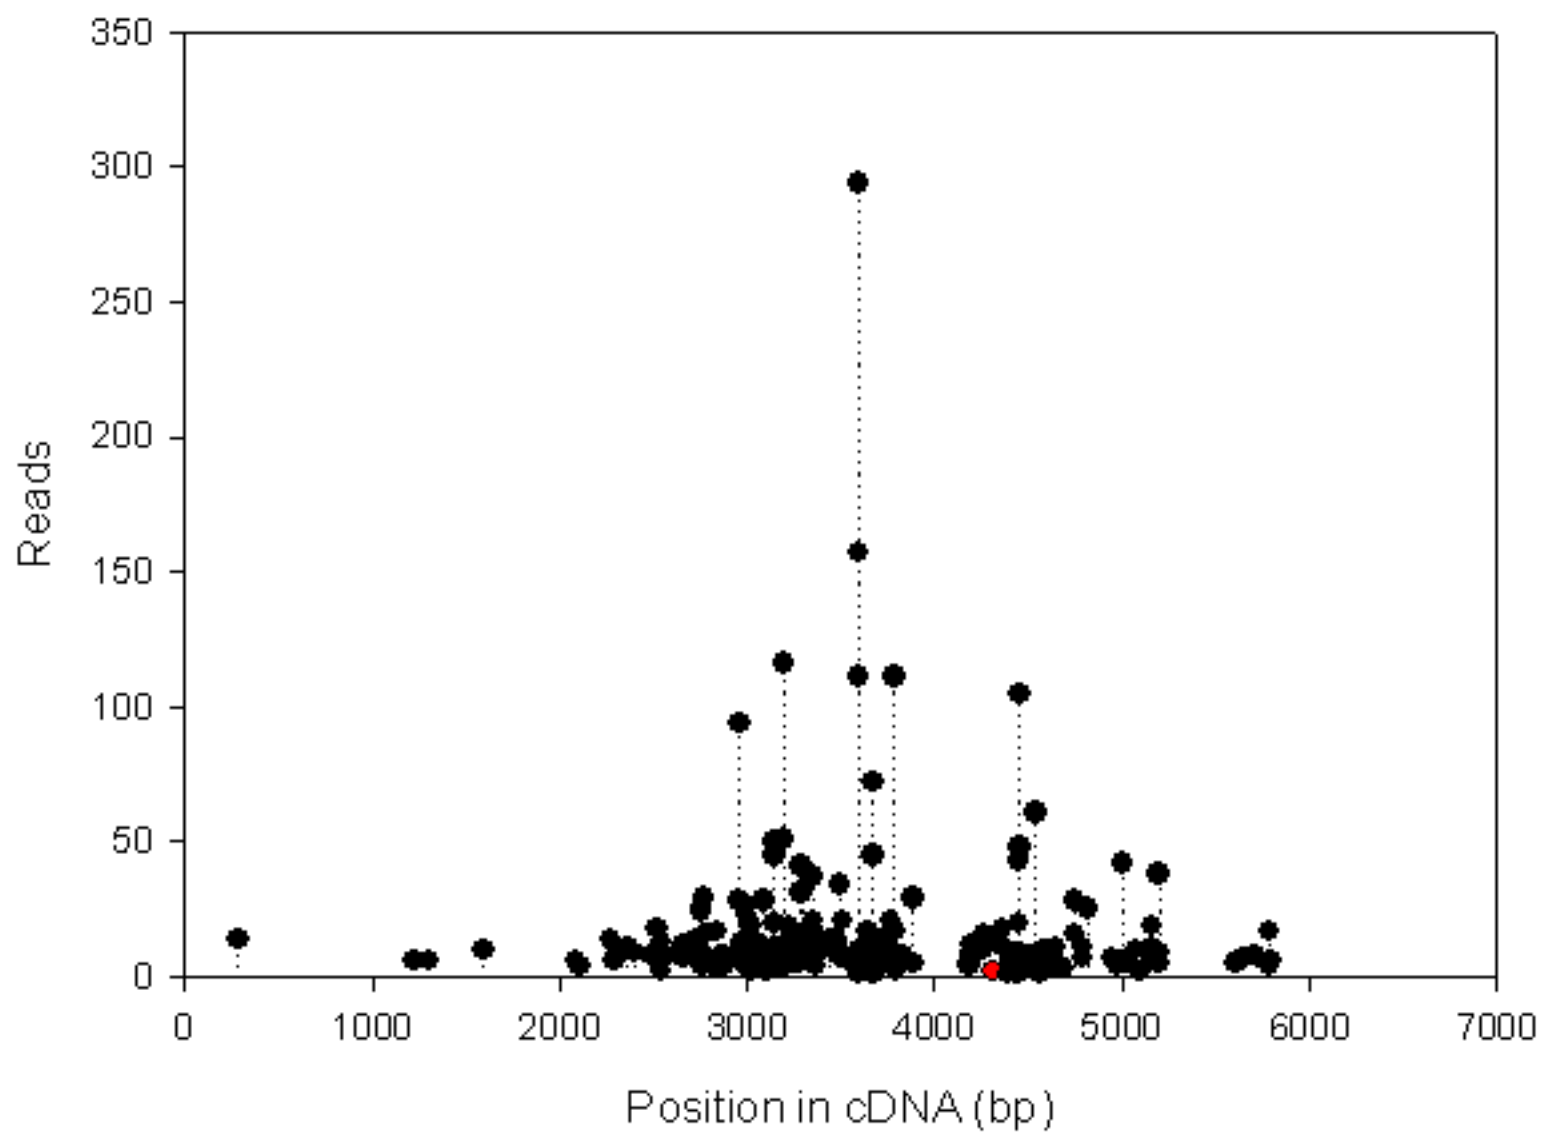

```

5' GA-GCGCCGGAUCAAUUUACAUAUGG 3'      Cs5g24810.1
   :: : :::::.....:::
3' CUACUCGGCUUGGUUAUAGUGU----- 5'    Csi-miR479.1

```

Csi-miR479.2, target=Cs6g21570.1 gene=Cs6g21570  
category=3  
score=5  
Cleavage Site=205

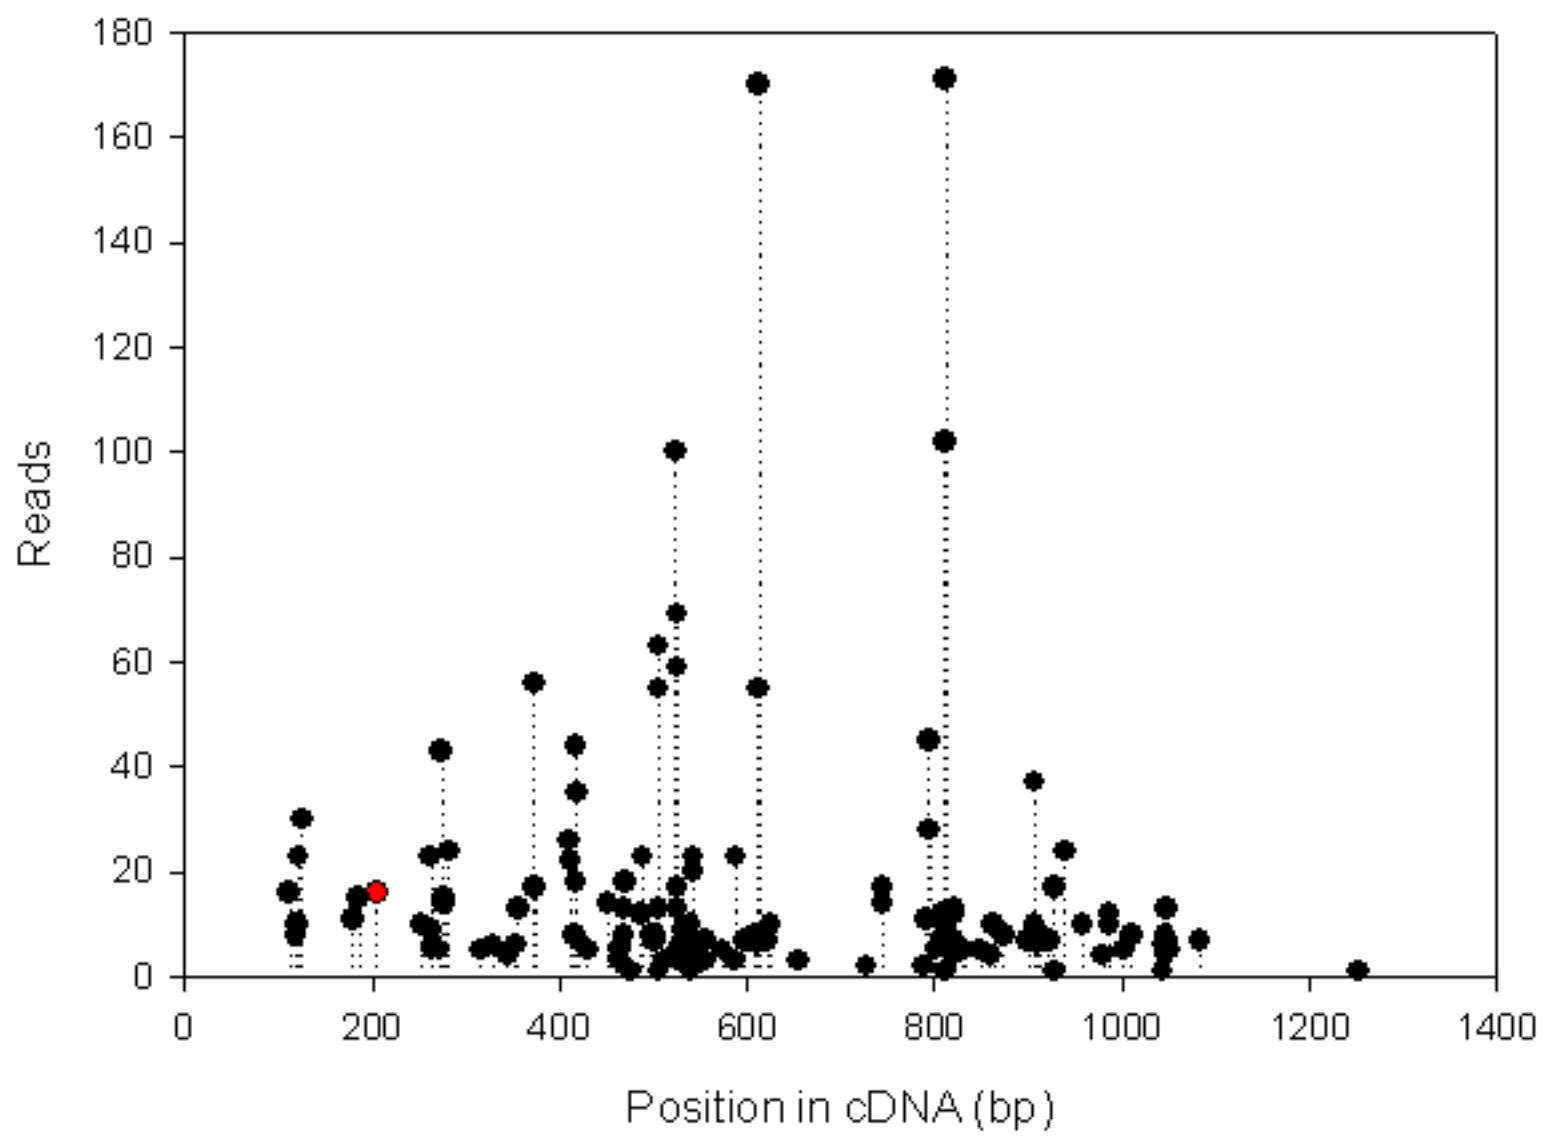

```

5' AUGA-CCGUACCAAUAUCAAAUCUUGU 3'      Cs6g21570.1
   :::  :::  :::::  :::::  :
3' -ACUCGGCUUGGUUAUAGUGU----- 5'      Csi-miR479.2

```

Csi-miR482b, target=Cs1g13430.1 gene=Cs1g13430  
 Category=3  
 Score=4  
 Cleavage Site=700

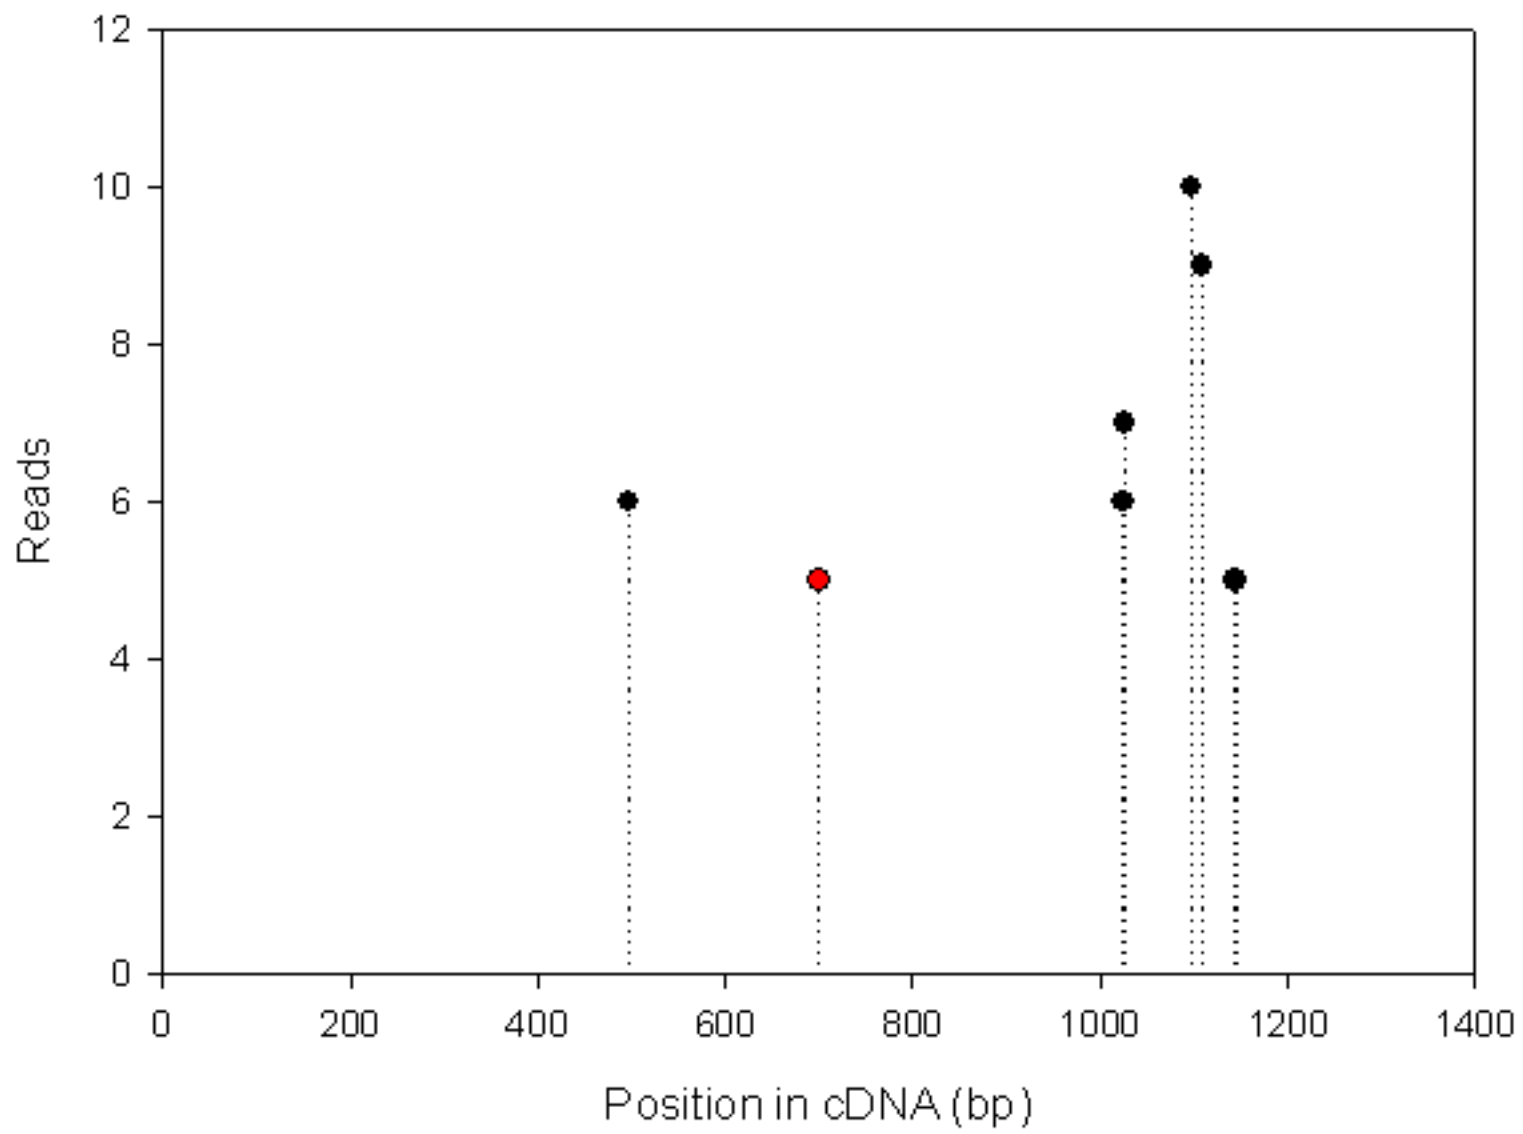

```

5' GGCAUGGGAGGGGUGGGUAAAACUAC 3'      Cs1g13430.1
  :: :::::::::::::::::::::
3' CCUACCCUCCCCACCCGUUCU----- 5'      Csi-miR482b
  
```

Csi-miR482c, target=Cs9g06846.1 gene=Cs9g06846  
 Category=3  
 Score=3  
 Cleavage Site=158

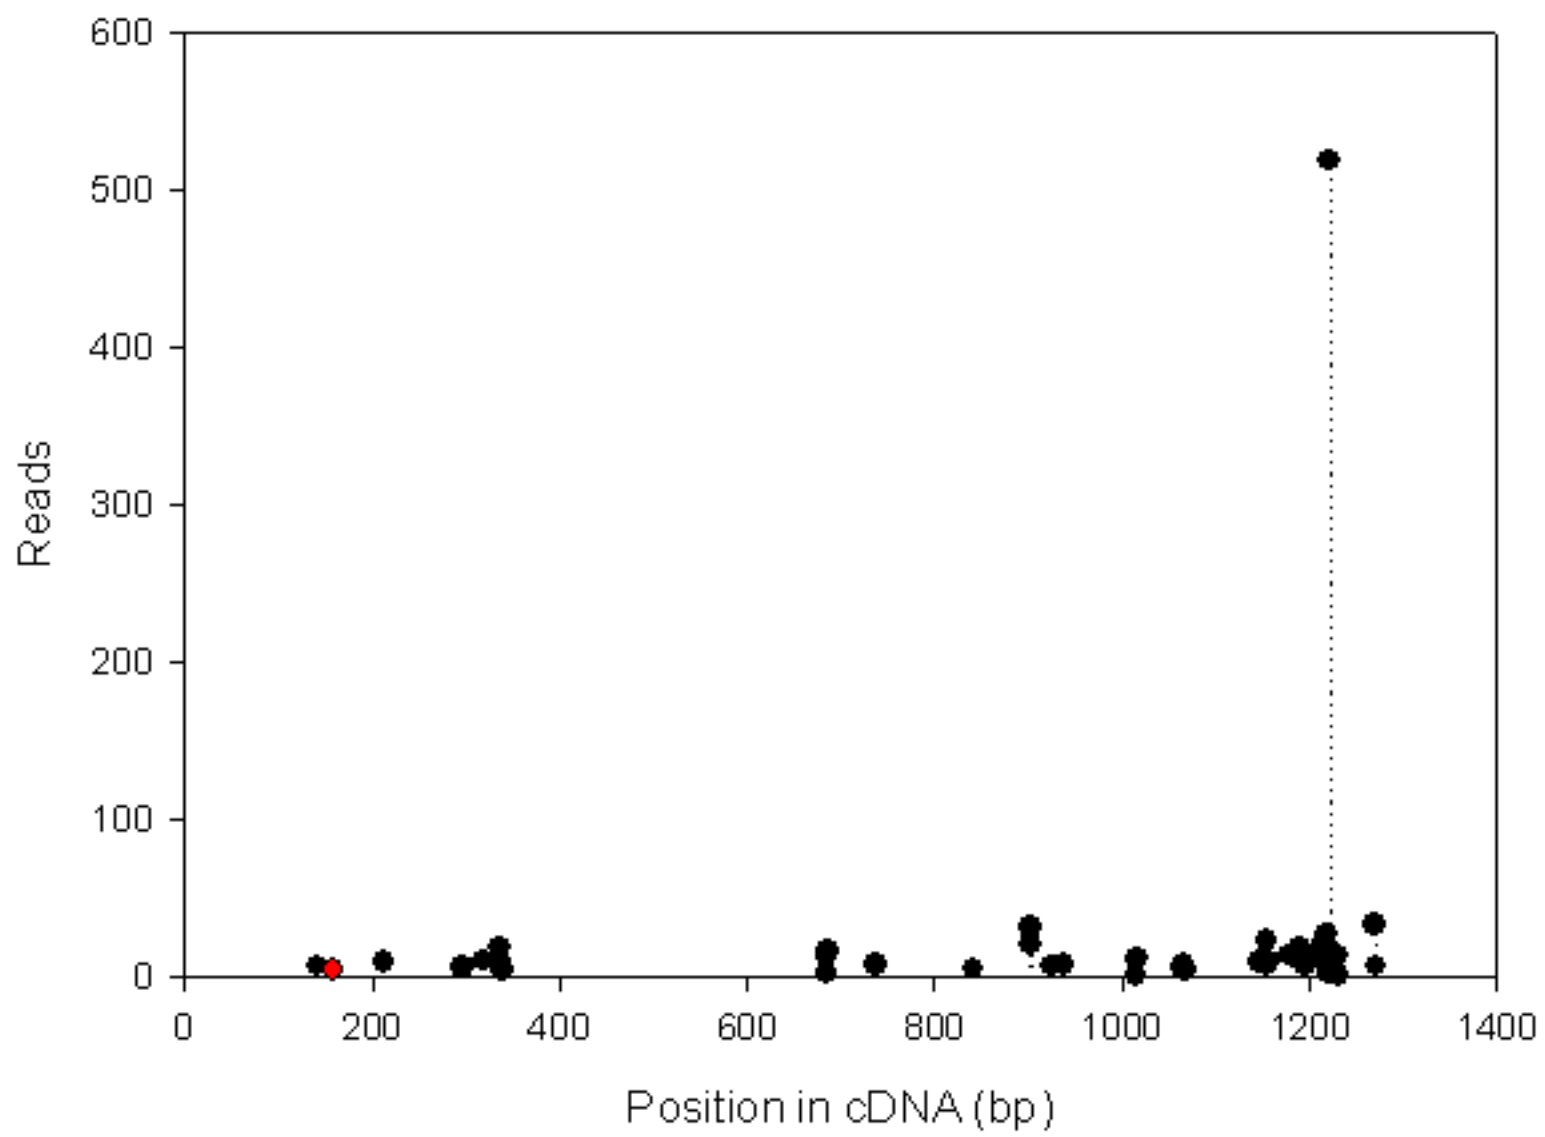

```

5' UGGGAAUAGGUGGACUAGGGAAAUU 3'      Cs9g06846.1
   :.:.:.:.:.:.:.:.:.:.:.:.:.:.:.
3' AUCCUUAUCCCCCUGAUCCCUU---- 5'      Csi-miR482c
  
```

Csi-miR482d, target=Cs6g10170.1 gene=Cs6g10170  
 Category=3  
 Score=5  
 Cleavage Site=1389

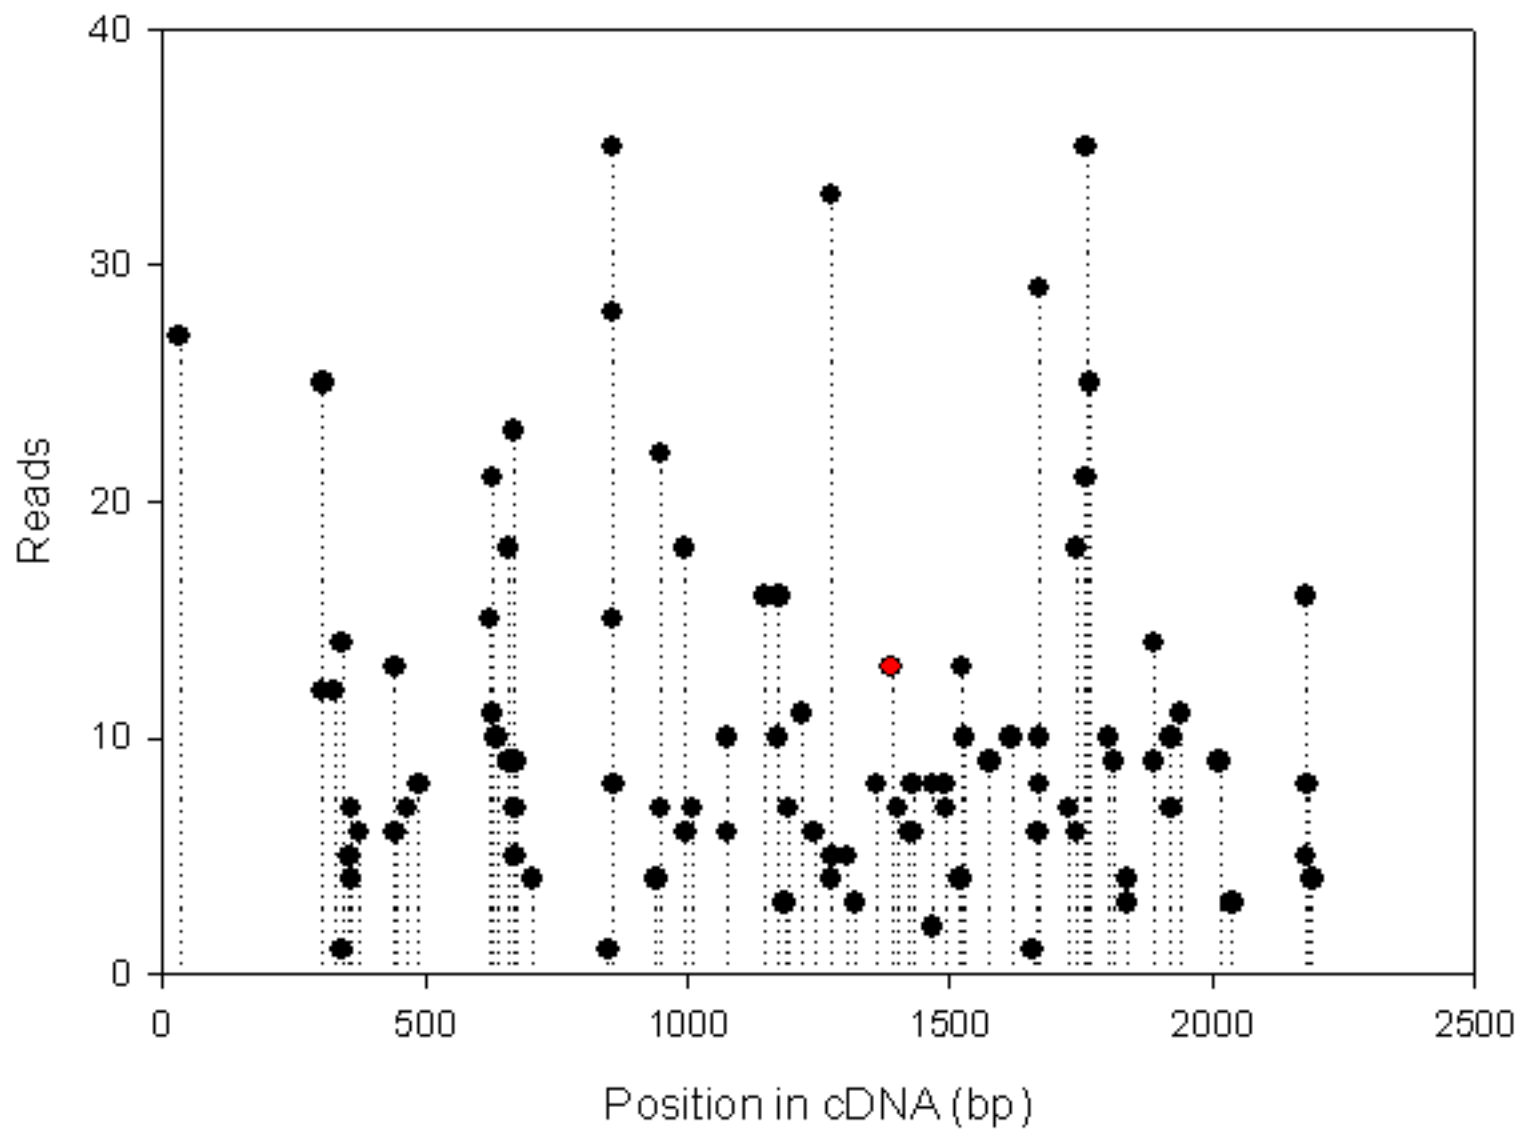

```

5' AGACAAGGGAGGAG-AGGGAAGAGAGG 3'      Cs6g10170.1
   :  :  :  :  :  :  :  :  :  :  :
3' -CCGUACCCACCUCAUCCCUUCU---- 5'      Csi-miR482d
  
```

Csi-miR5054.2, target=Cs7g07710.1 gene=Cs7g07710  
 Category=3  
 Score=4.5  
 Cleavage Site=3045

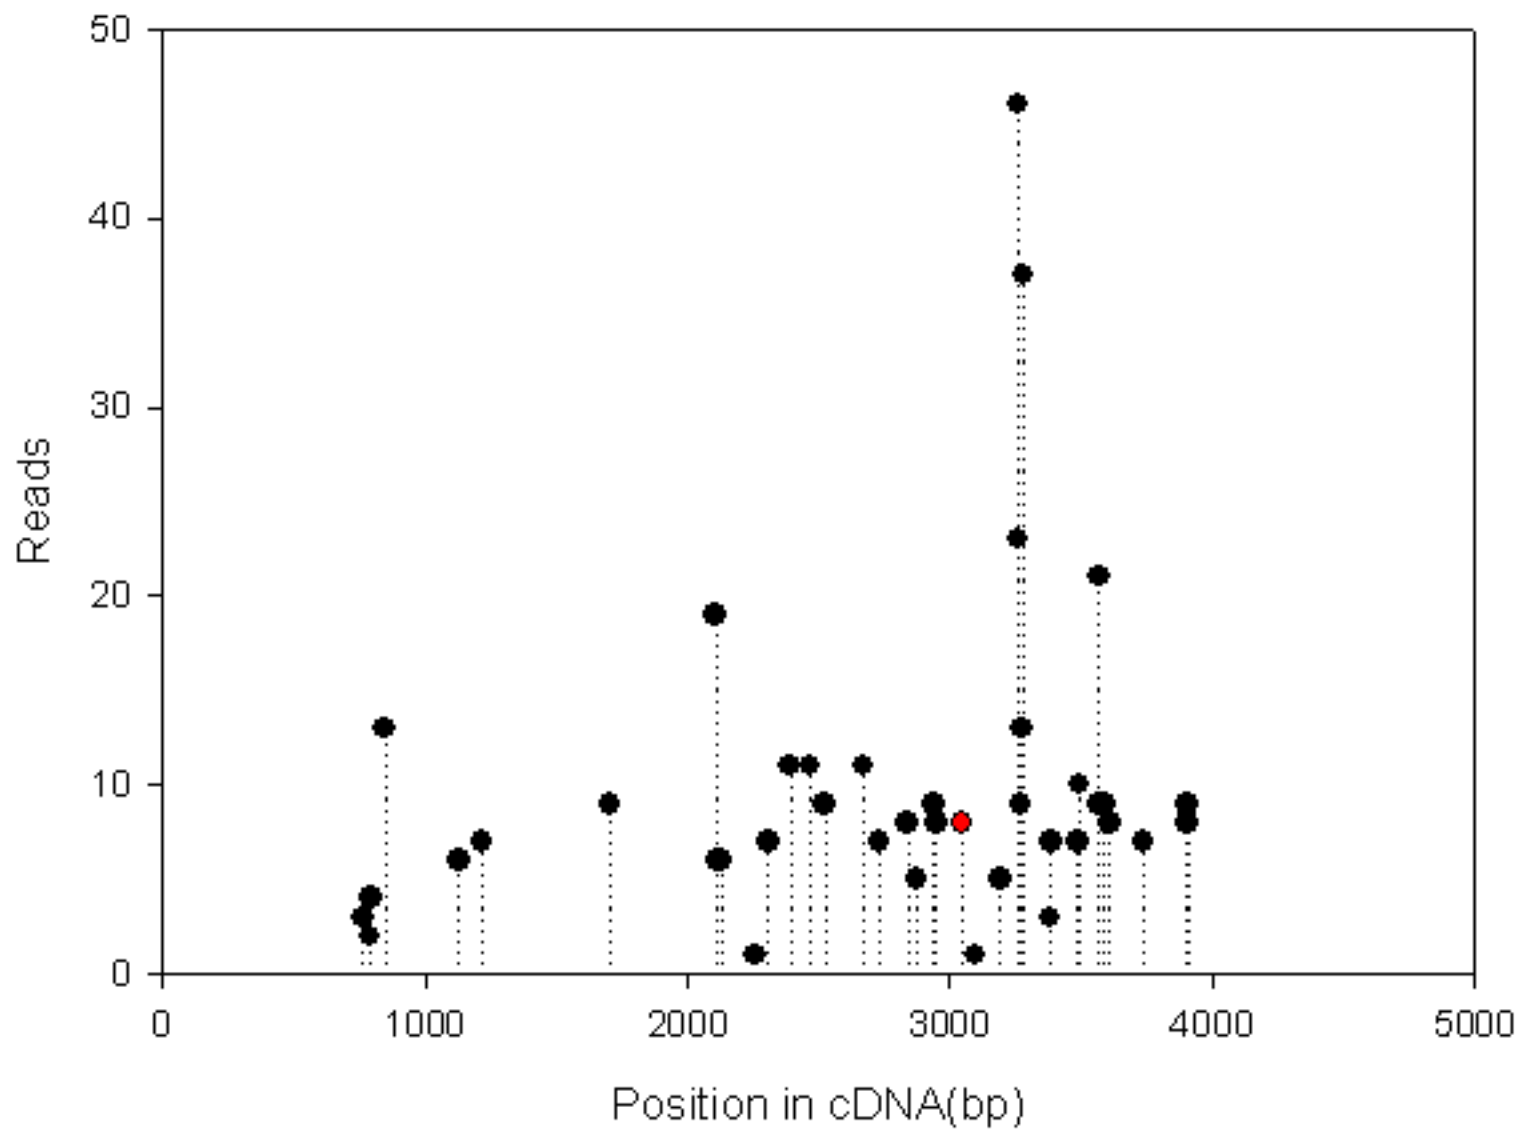

```

5' GGAGUUGUCCAGUCUGUGGGGAAGGC 3'      Cs7g07710.1
   : : . : : : : : : : : : : :
3' ----ACCGCGGCAGACACCCCUUG-- 5'      Csi-miR5054.2

```

Csi-miR5179, target=Cs1g24860.1 gene=Cs1g24860  
 Category=3  
 Score=3.5  
 Cleavage Site=820

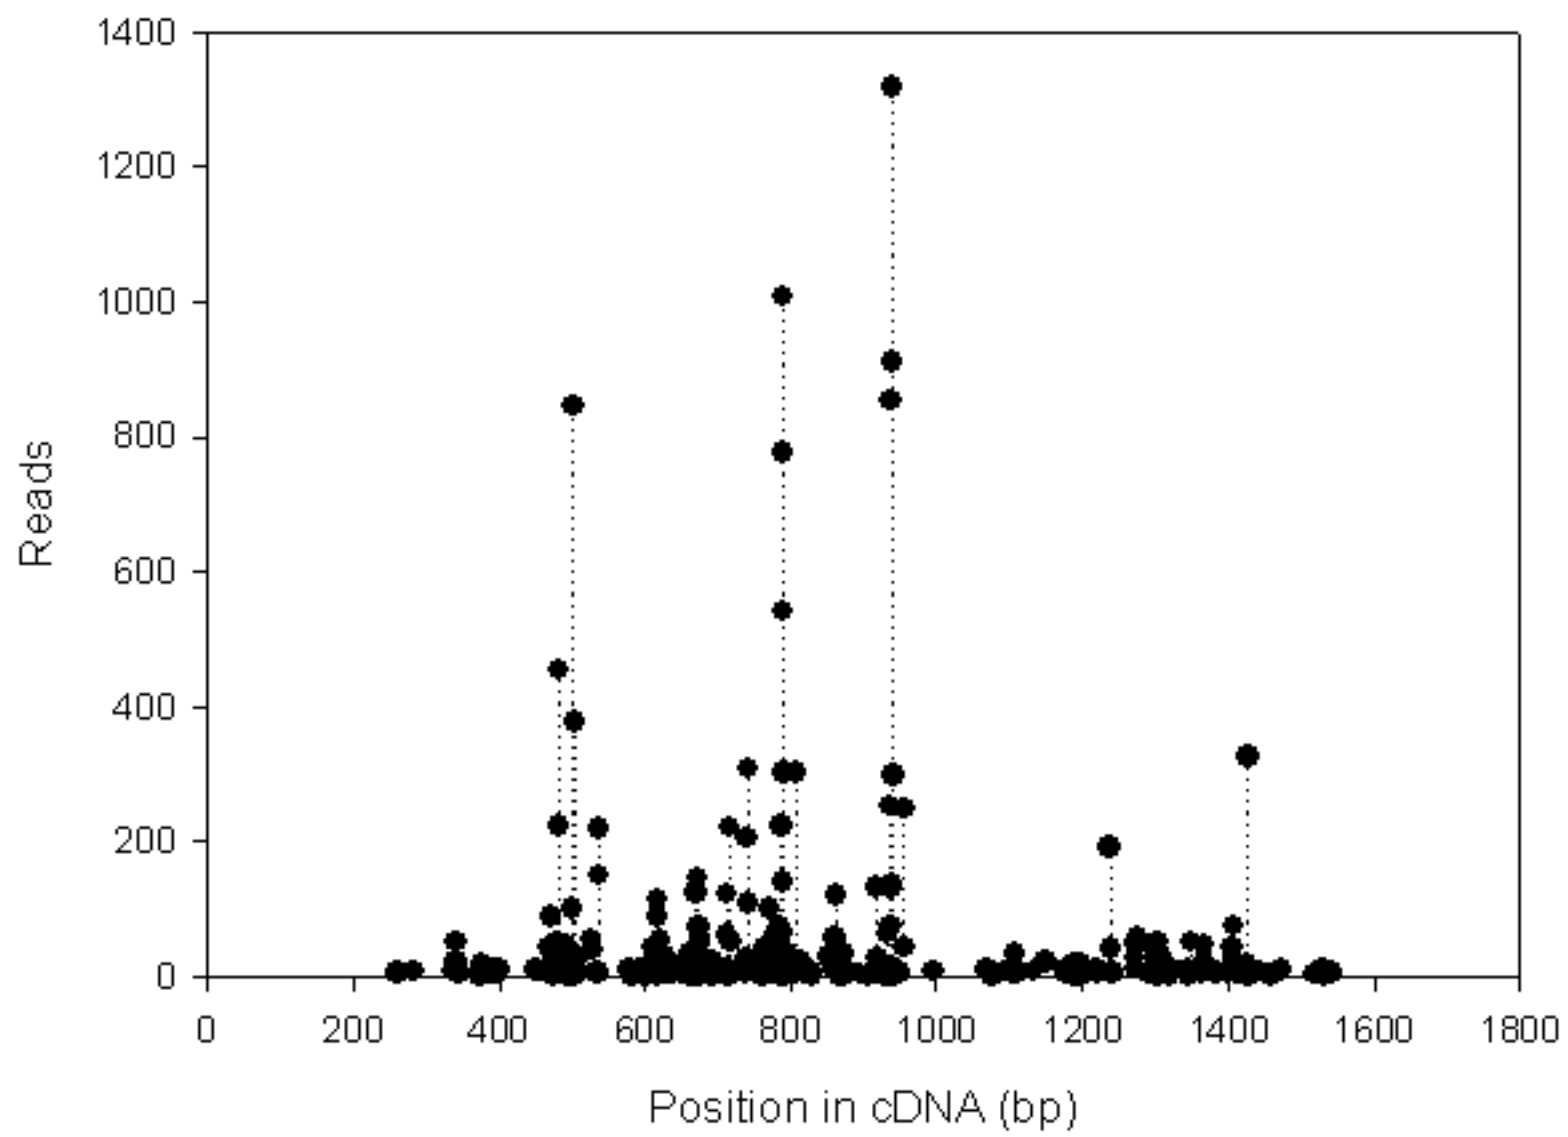

```

5' AACUGCGUGGUCUUGAGCAAACAUG 3'      Cs1g24860.1
   : : : : : : : : : : : : : : : :
3' -UAACGCGCCAGAACUCGUUCU---- 5'      Csi-miR5179
  
```



Csi-miR5291a, target=Cs1g02730.1 gene=Cs1g02730  
 Category=3  
 Score=4.5  
 Cleavage Site=665

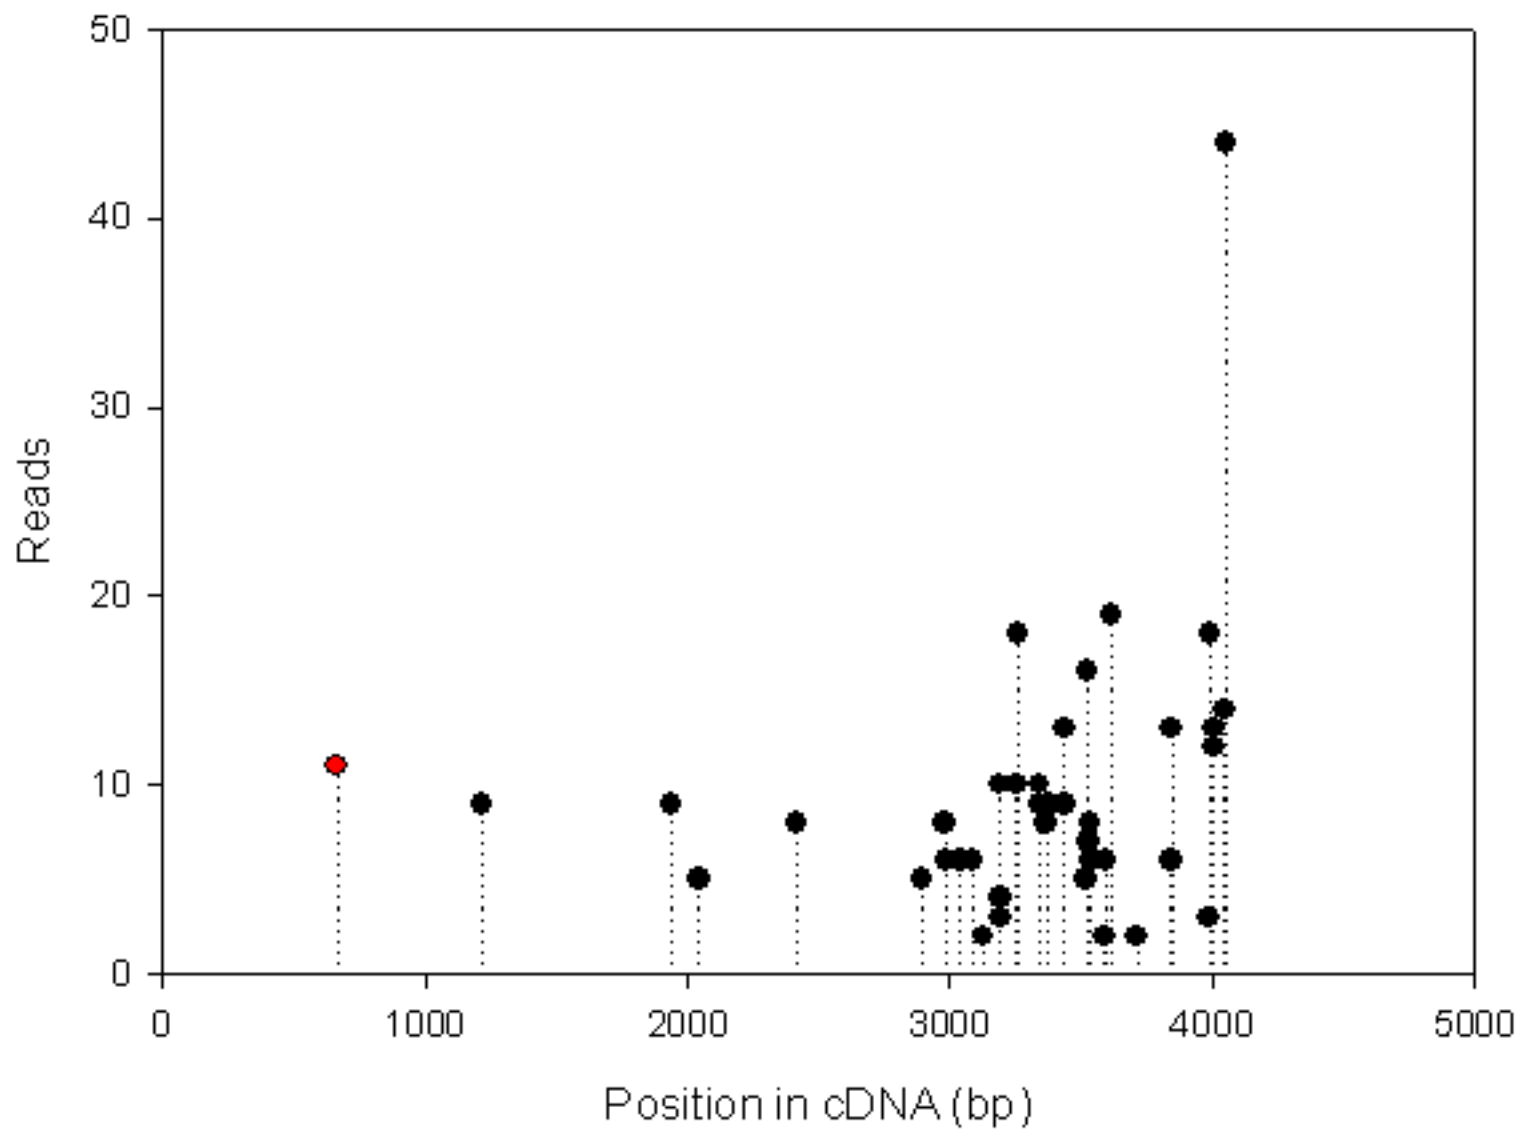

```

5' GACUCAACUCUUUGACCAUUCAUCAA 3'      Cs1g02730.1
   ::: : : : : : : : : : : : : :
3' ----GUUUAGGAUC-GGUAAGUAGUU 5'      Csi-miR5291a
  
```

Csi-miR530a, target=Cs3g18550.1 gene=Cs3g18550  
 Category=3  
 Score=5  
 Cleavage Site=332

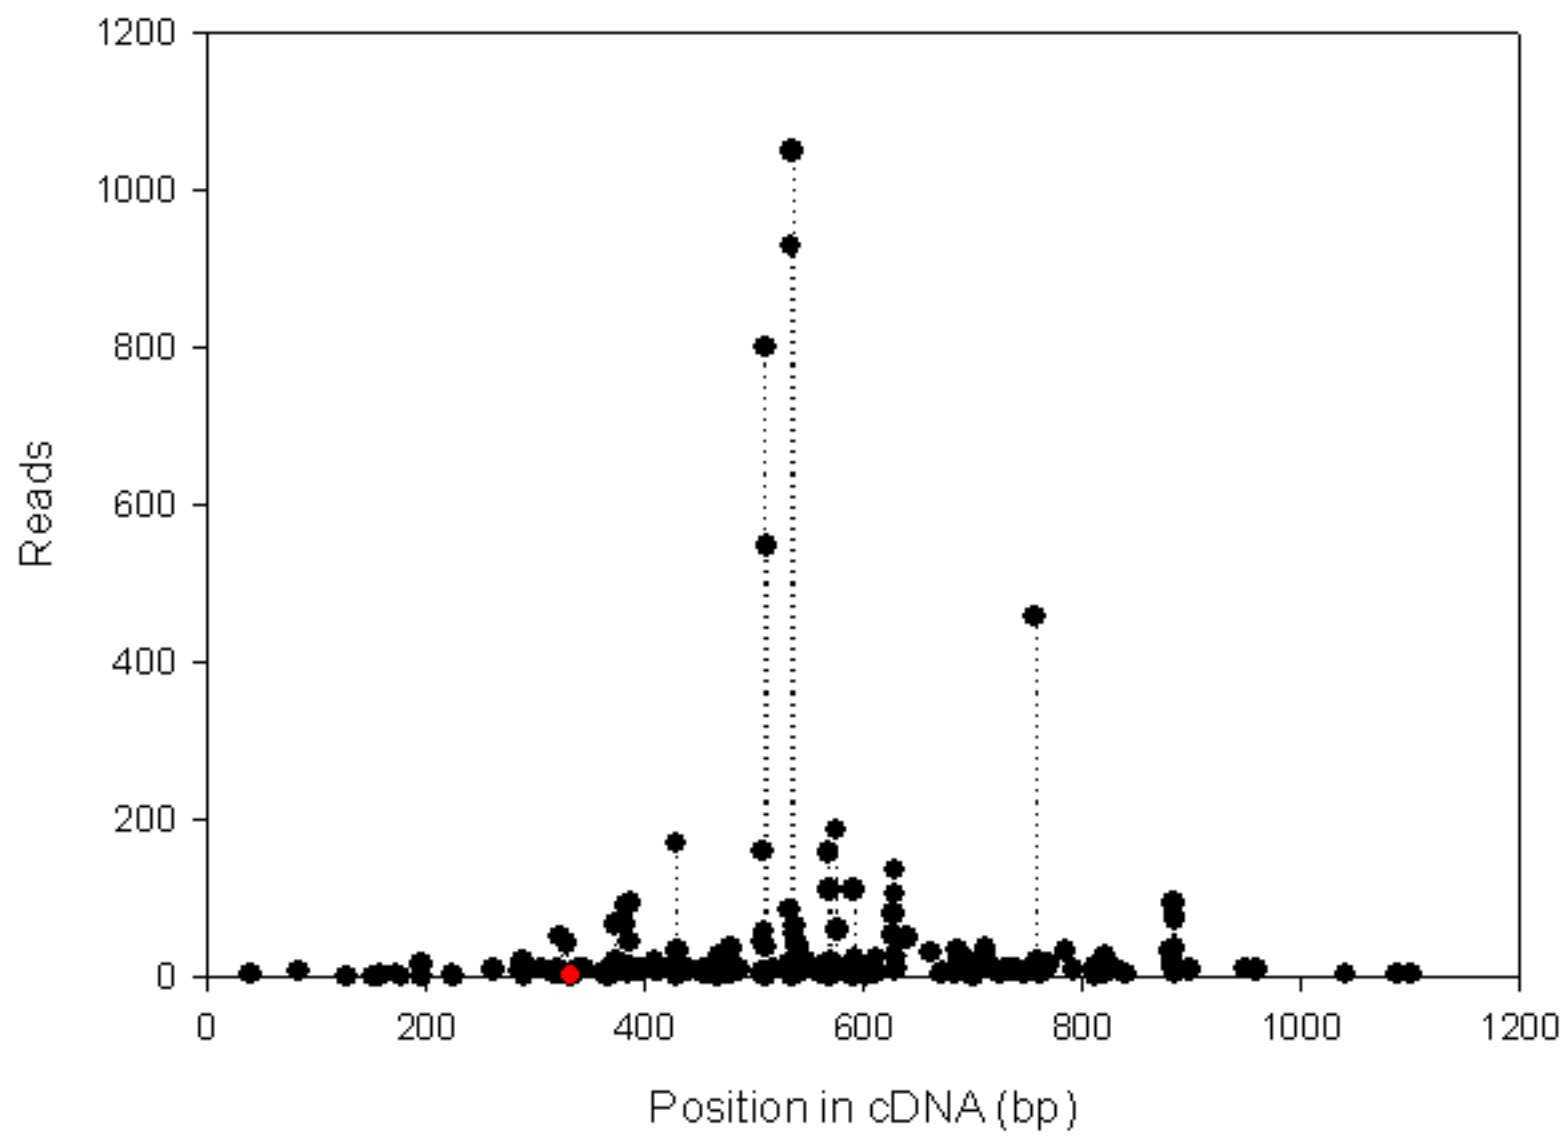

```

5' GUGCCAAGGUGAAGGU-UGAAUGCAA 3'      Cs3g18550.1
   :::::  ::::  ..:::
3' ----GUUCCACGUCCACGUUUACGU-- 5'      Csi-miR530a
  
```

Csi-miR530b, target=Cs4g05330.1 gene=Cs4g05330  
 Category=3  
 Score=5  
 Cleavage Site=2322

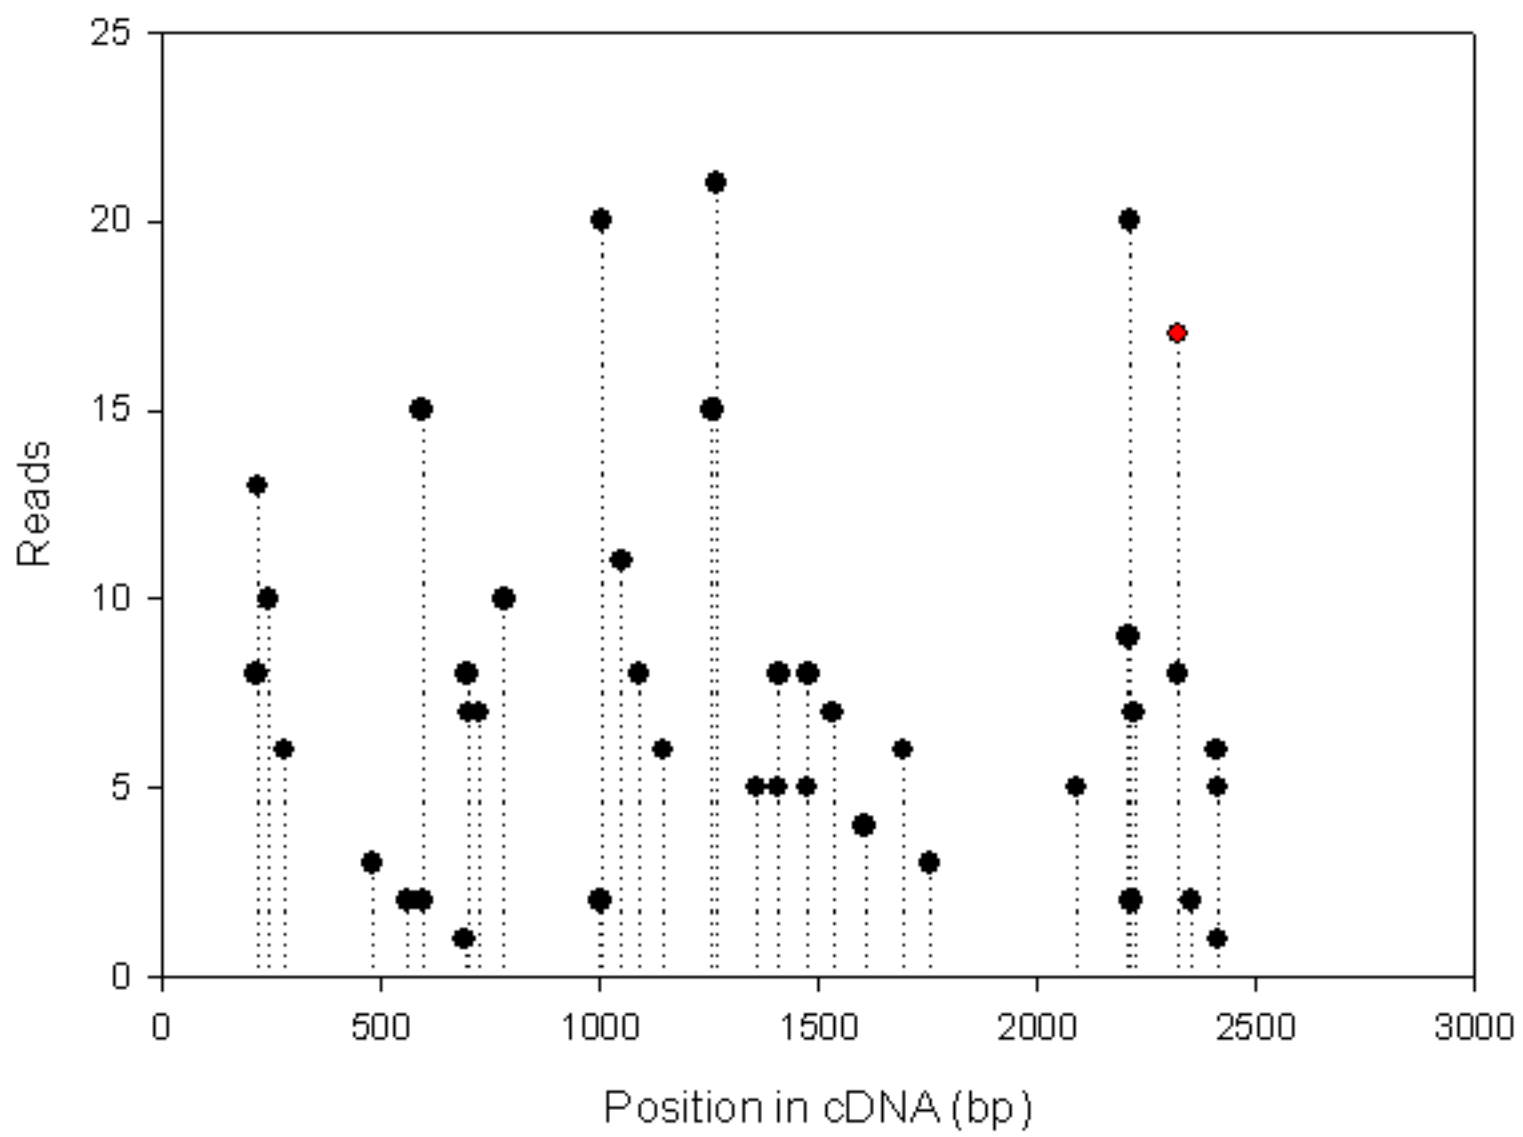

```

5' AAUGGGGACGCAGGUGC UAAUGCAUG 3'      Cs4g05330.1
   . . . . . : : : : : : : : : : :
3' ---GUUCUACGUCCACGUUUACGU-- 5'      Csi-miR530b
  
```

Csi-miR530b, target=Cs6g11650.1 gene=Cs6g11650  
 Category:3  
 Score=5  
 Cleavage Site=261

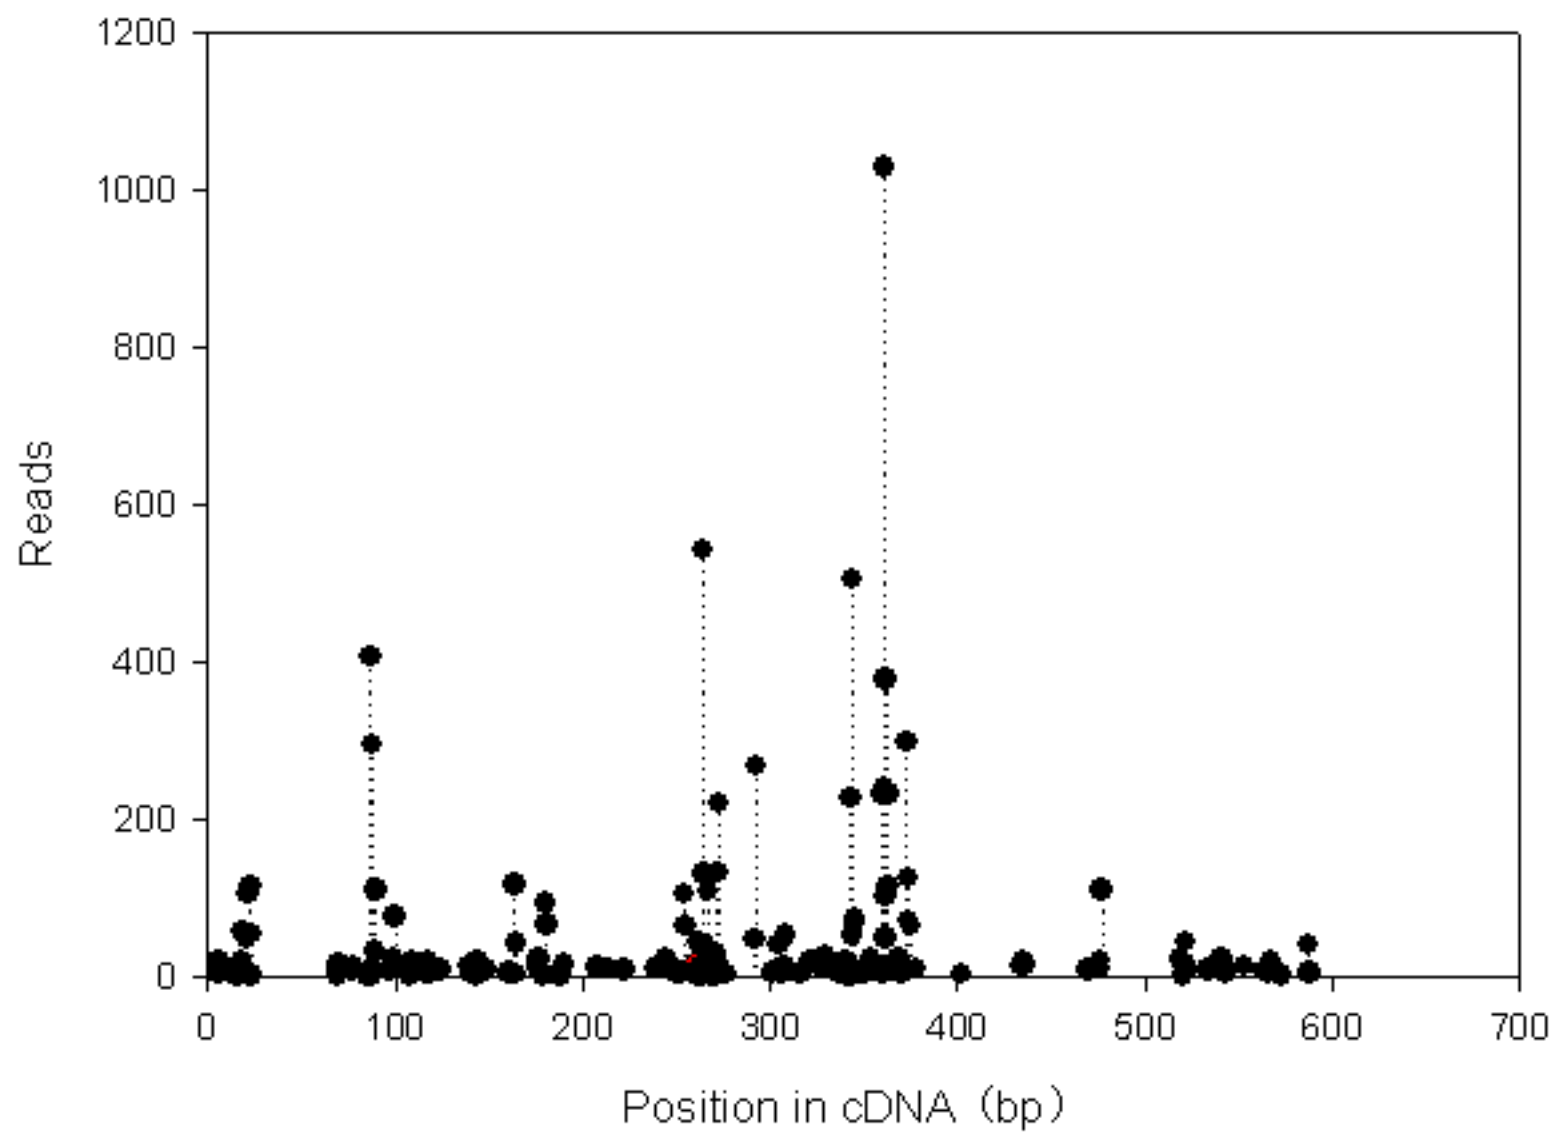

```

5' GGAGAUUCAGGUGCGAAUGUGAAGAG 3'      Cs6g11650.1
   . : : : : : : : : : : : : : : : .
3' GUUCUACGUCCACGUUUACGU----- 5'    Csi-miR530b
  
```

Csi-miR535.1, target=Cs4g05470.1 gene=Cs4g05470  
 Category=3  
 Score=4  
 Cleavage Site=1460

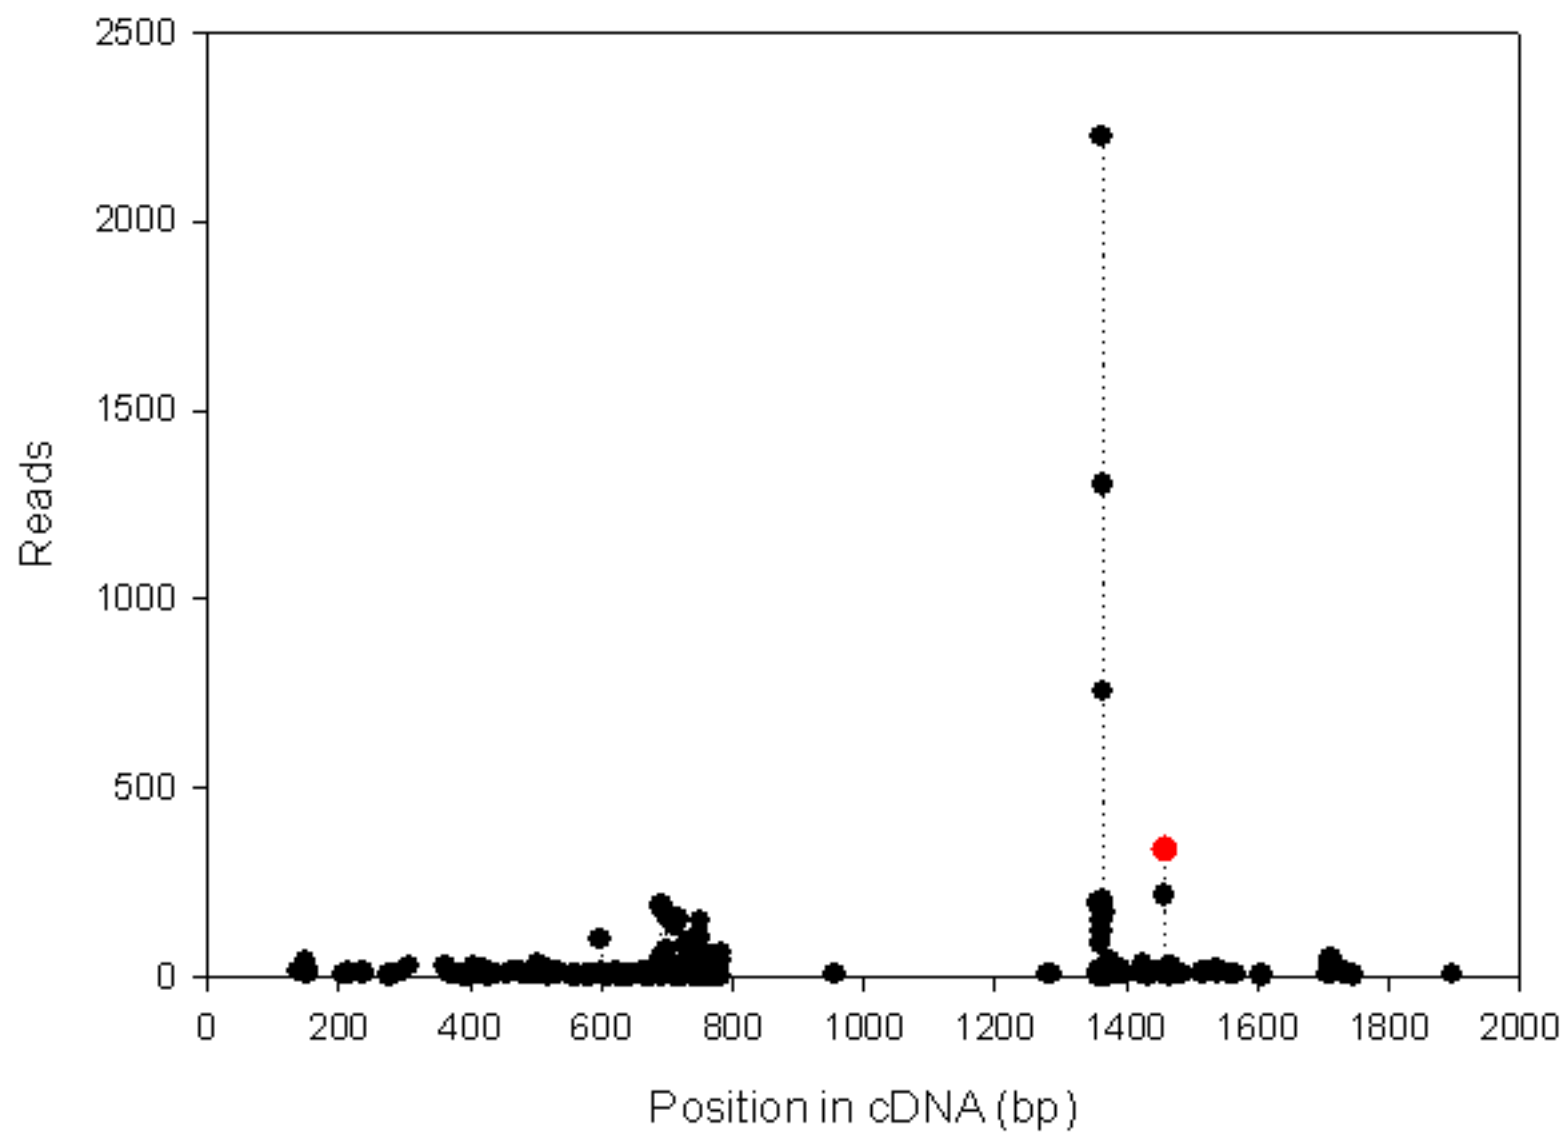

```

5' CUCUGUG-UUUCUCUCAUUGUUGGGAU 3'      Cs4g05470.1
   : : : : : . : : : : : : : : : : . .
3' --CACACGAGAGAGAGUAACAGU---- 5'      Csi-miR535.1
  
```

Csi-miR535.2, target=Cs2g05730.1 gene=Cs2g05730  
 Category:1  
 Score=5  
 Cleavage Site=818



```

5' CGUGCUCUCUCUCUUCUGUCA AUGCU 3'      Cs2g05730.1
   ::::::::::::::: : ::::::
3' ACACGAGAGAGAGUA-ACAGU----- 5'      Csi-miR535.2
  
```

Csi-miR535.2, target=Cs4g05470.1 gene=Cs4g05470  
 Category=3  
 Score=3  
 Cleavage Site=1459

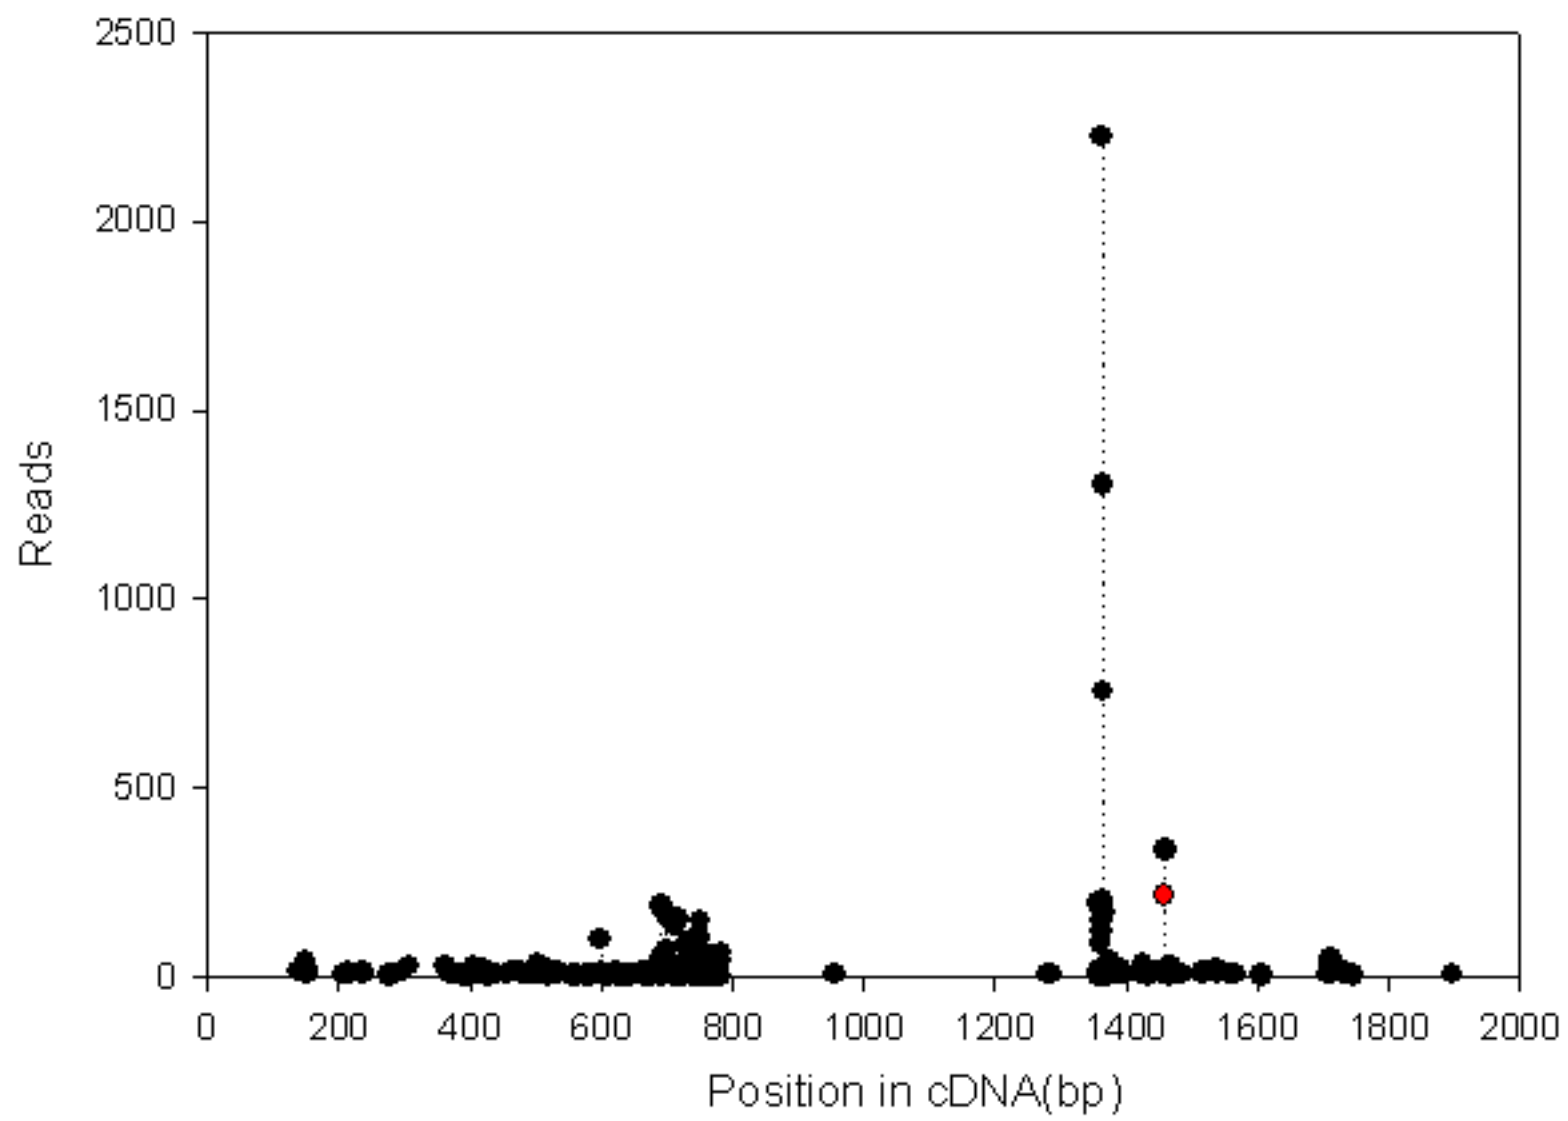

```

5' UCUCUGUG-UUUCUCUCAUUGUUGGGA 3'      Cs4g05470.1
   :   :   :   :   :   :   :   :   :
3' ----ACACGAGAGAGAGUAACAGU---- 5'      Csi-miR535.2
  
```

Csi-miR536-5p, target=Cs1g15460.1 gene=Cs1g15460  
 Category=3  
 Score=5  
 Cleavage Site=2245

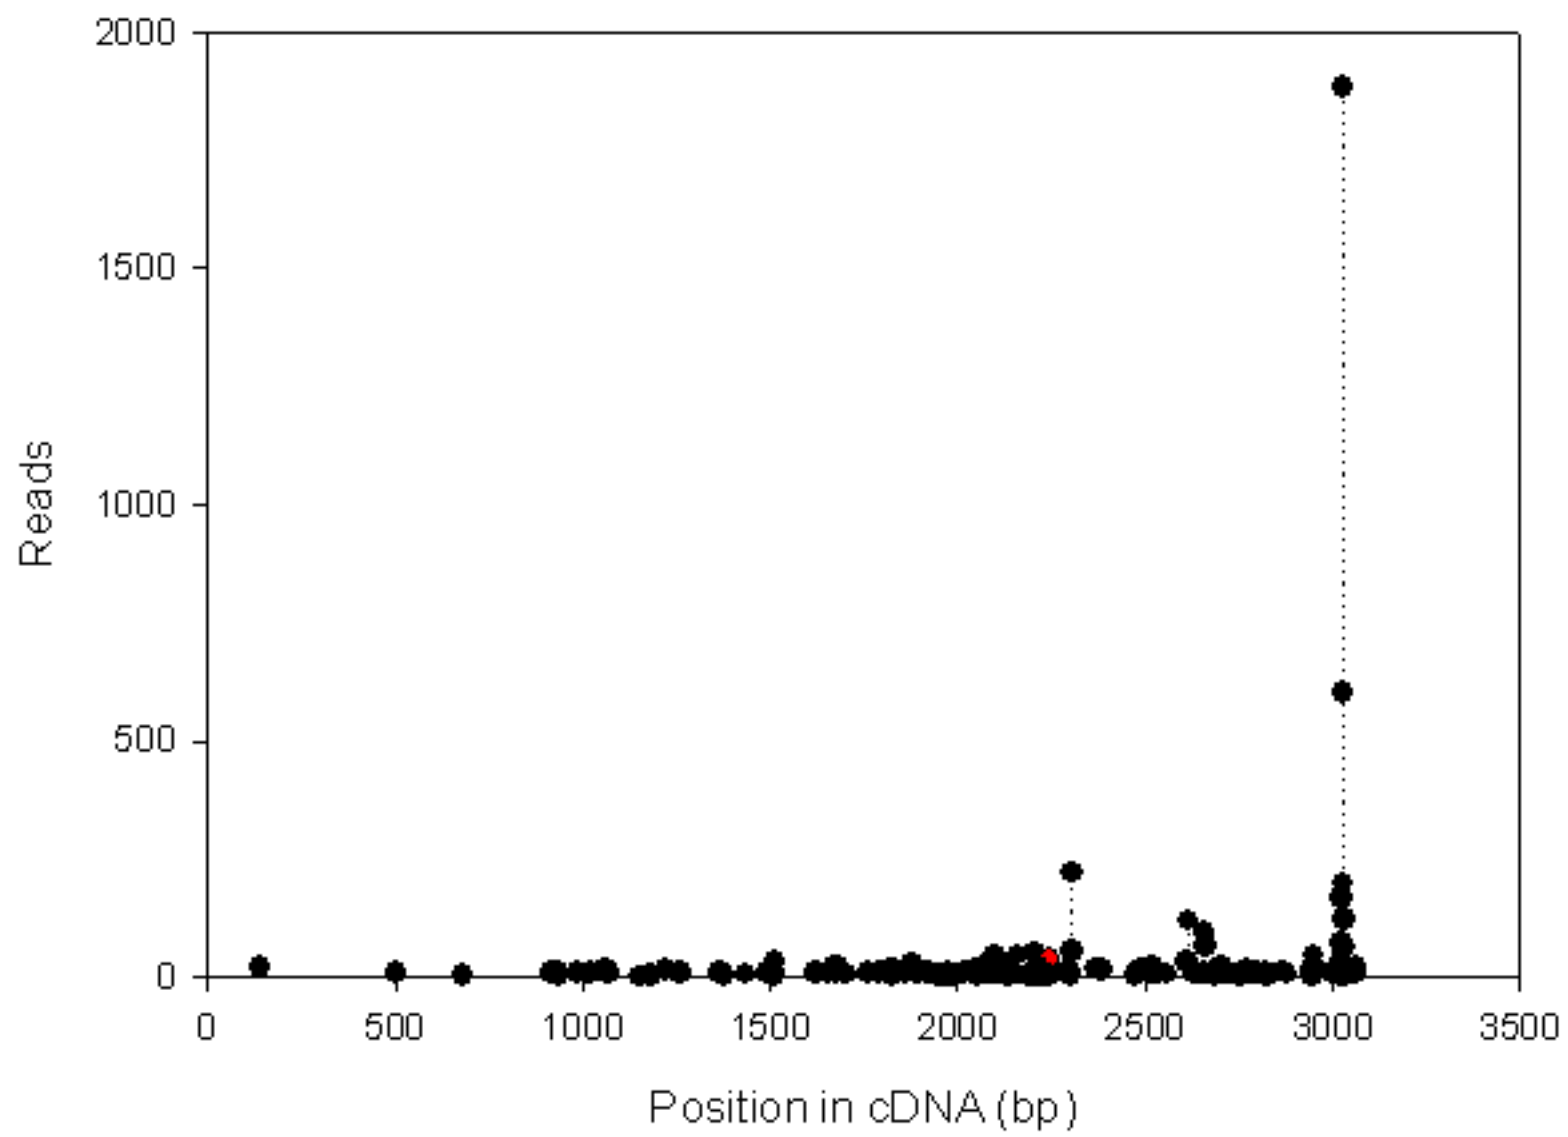

|    |                                           |    |               |
|----|-------------------------------------------|----|---------------|
| 5' | AGAAGGUUCCUCUGCUGGGGUGCCAU                | 3' | Cs1g15460.1   |
|    | : : : : : : : : : : : : : : : : : : : : : |    |               |
| 3' | -CUACCAAGGUG-CGACCCCACGC--                | 5' | Csi-miR536-5p |



Csi-miR827-5p.1, target=Cs1g24800.1 gene=Cs1g24800  
 Category=3  
 Score=3.5  
 Cleavage Site=2095

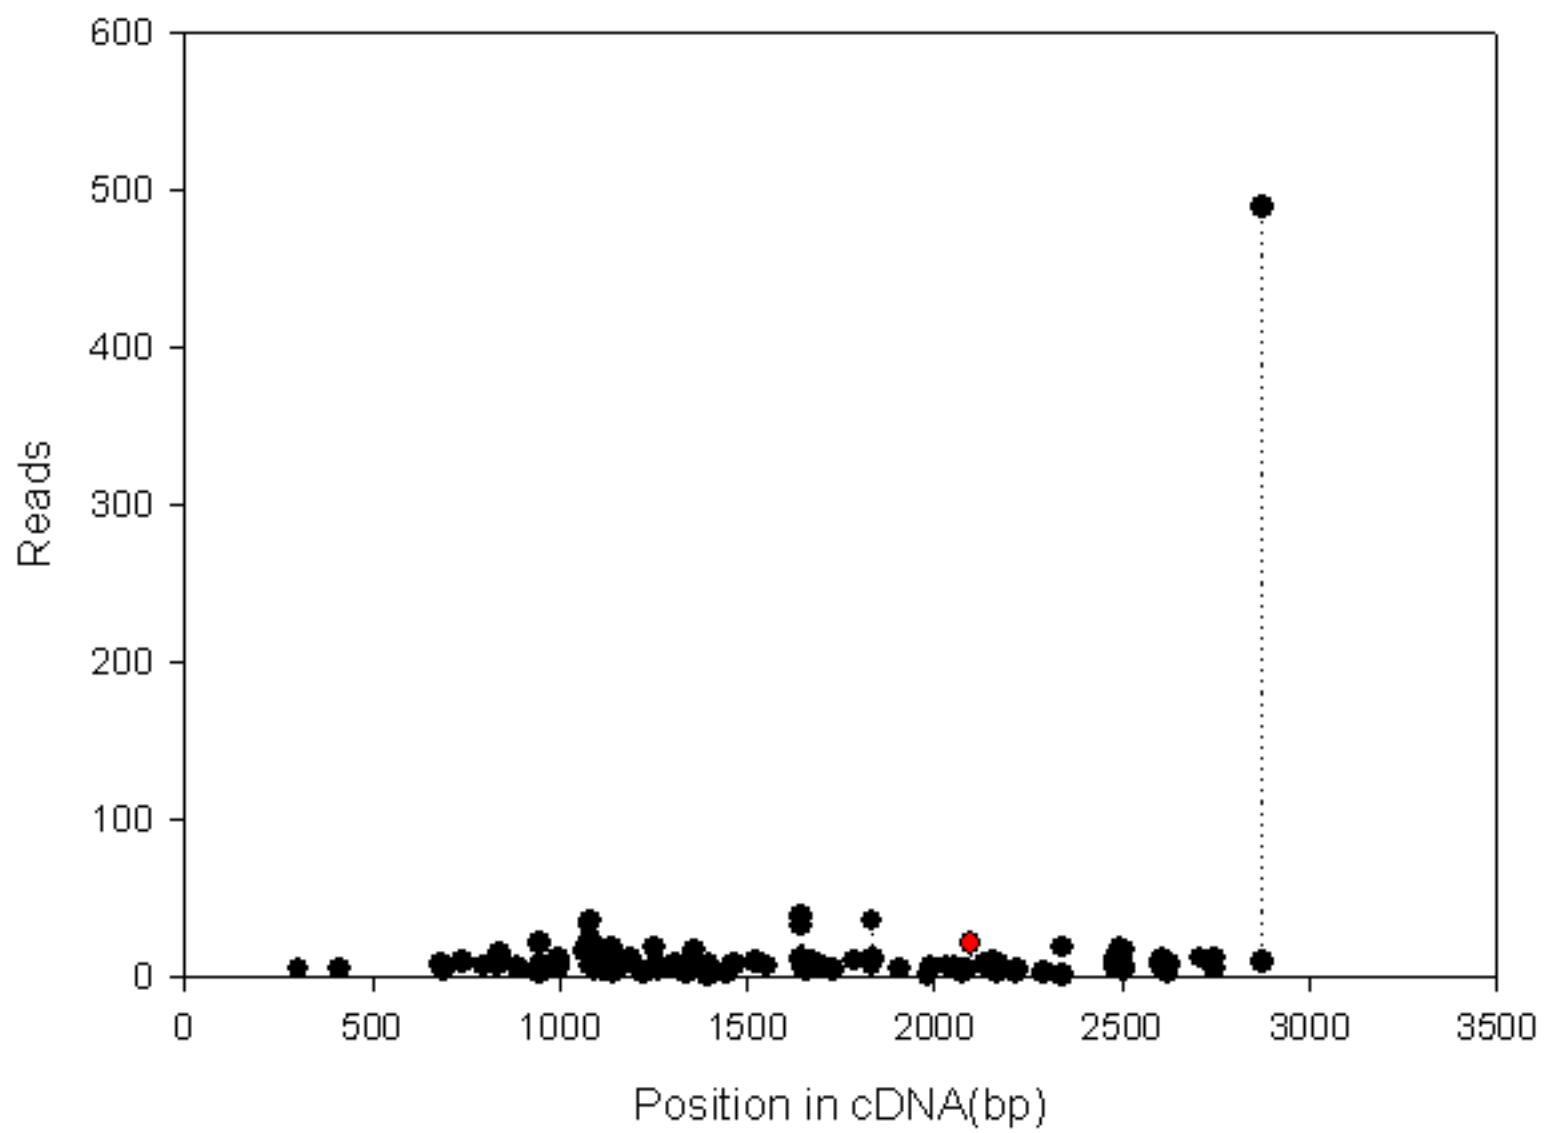

```

5' UGCGAGUGCAUGACAAUCAACAAUG 3'      Cs1g24800.1
   :: :. ::::::::::::::::::::
3' ---CUAAUCUACUGUUAGUUGUUC-- 5'      Csi-miR827-5p.1

```

Csi-miR827-5p.2, target=Cs9g10630.1 gene=Cs9g10630  
 Category=3  
 Score=4.5  
 Cleavage Site=194

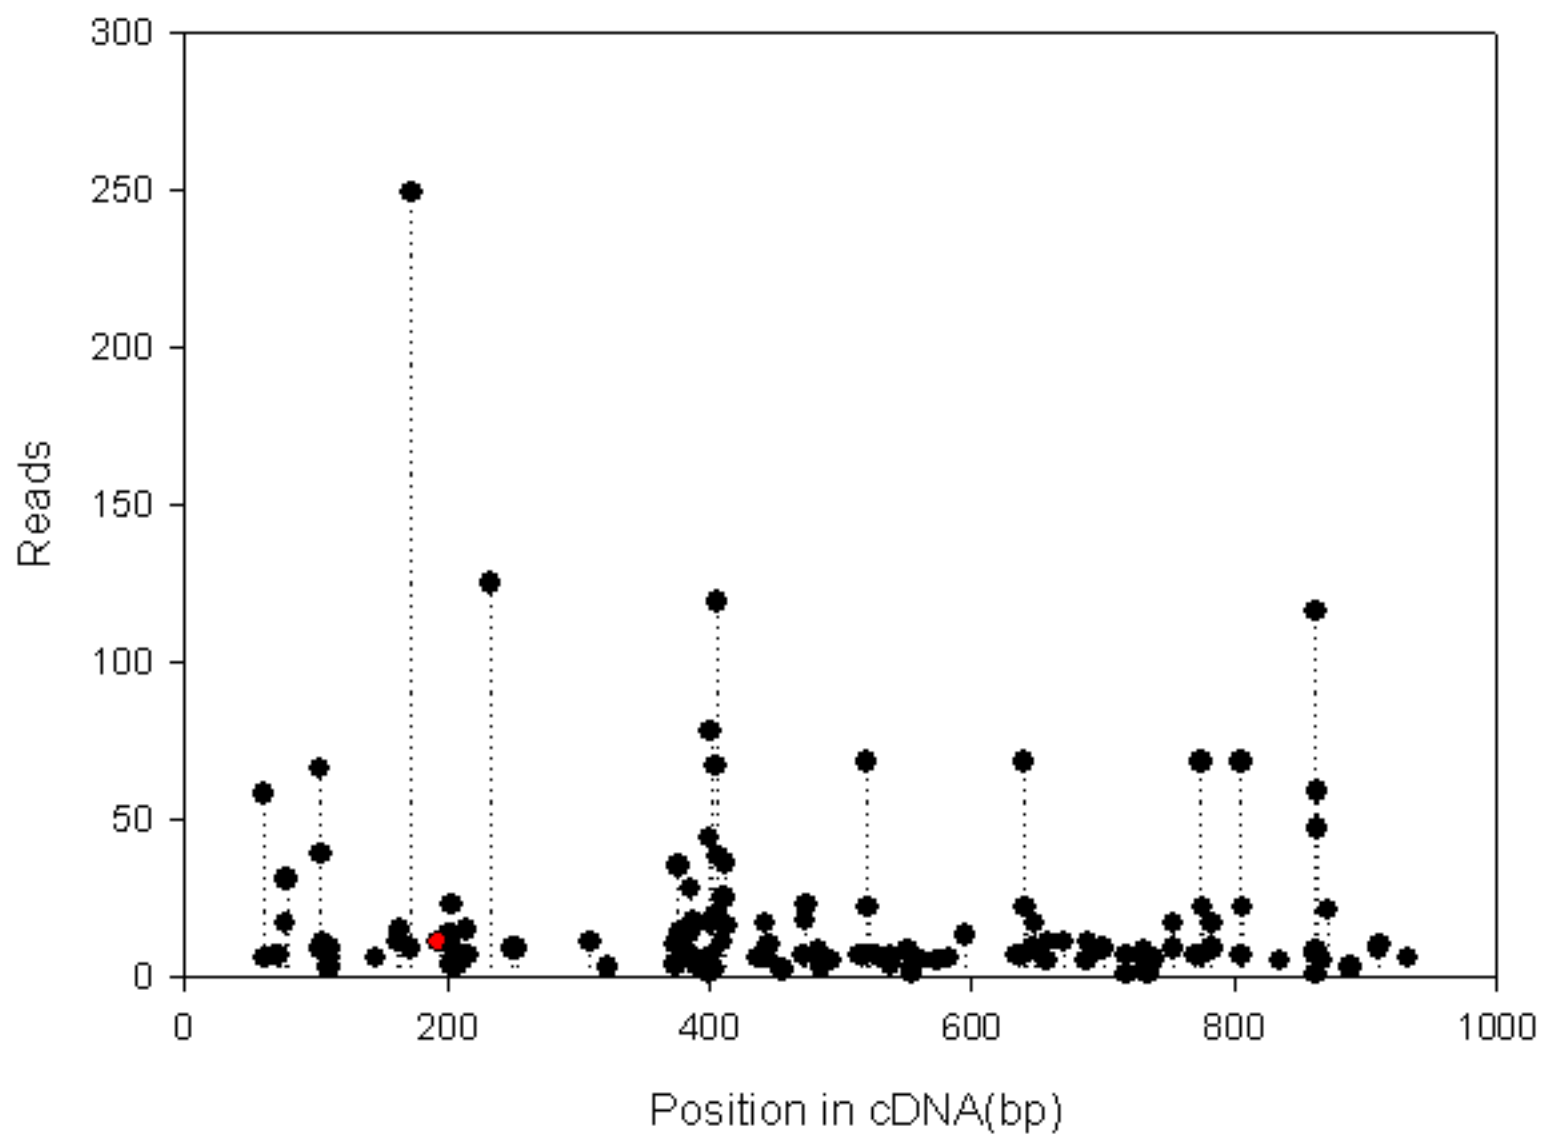

```

5' GCCUACAAG-CAAUCAACAAGCGAAUG 3'      Cs9g10630.1
   : : : : : : : : : : : : : : : :
3' --AAUCUACUGUAGUUGUUCGU---- 5'      Csi-miR827-5p.2
  
```

Csi-miR828, target=Orange1.1t00180.1 gene=Orange1.1t00180  
 Category=3  
 Score=5  
 Cleavage Site=652

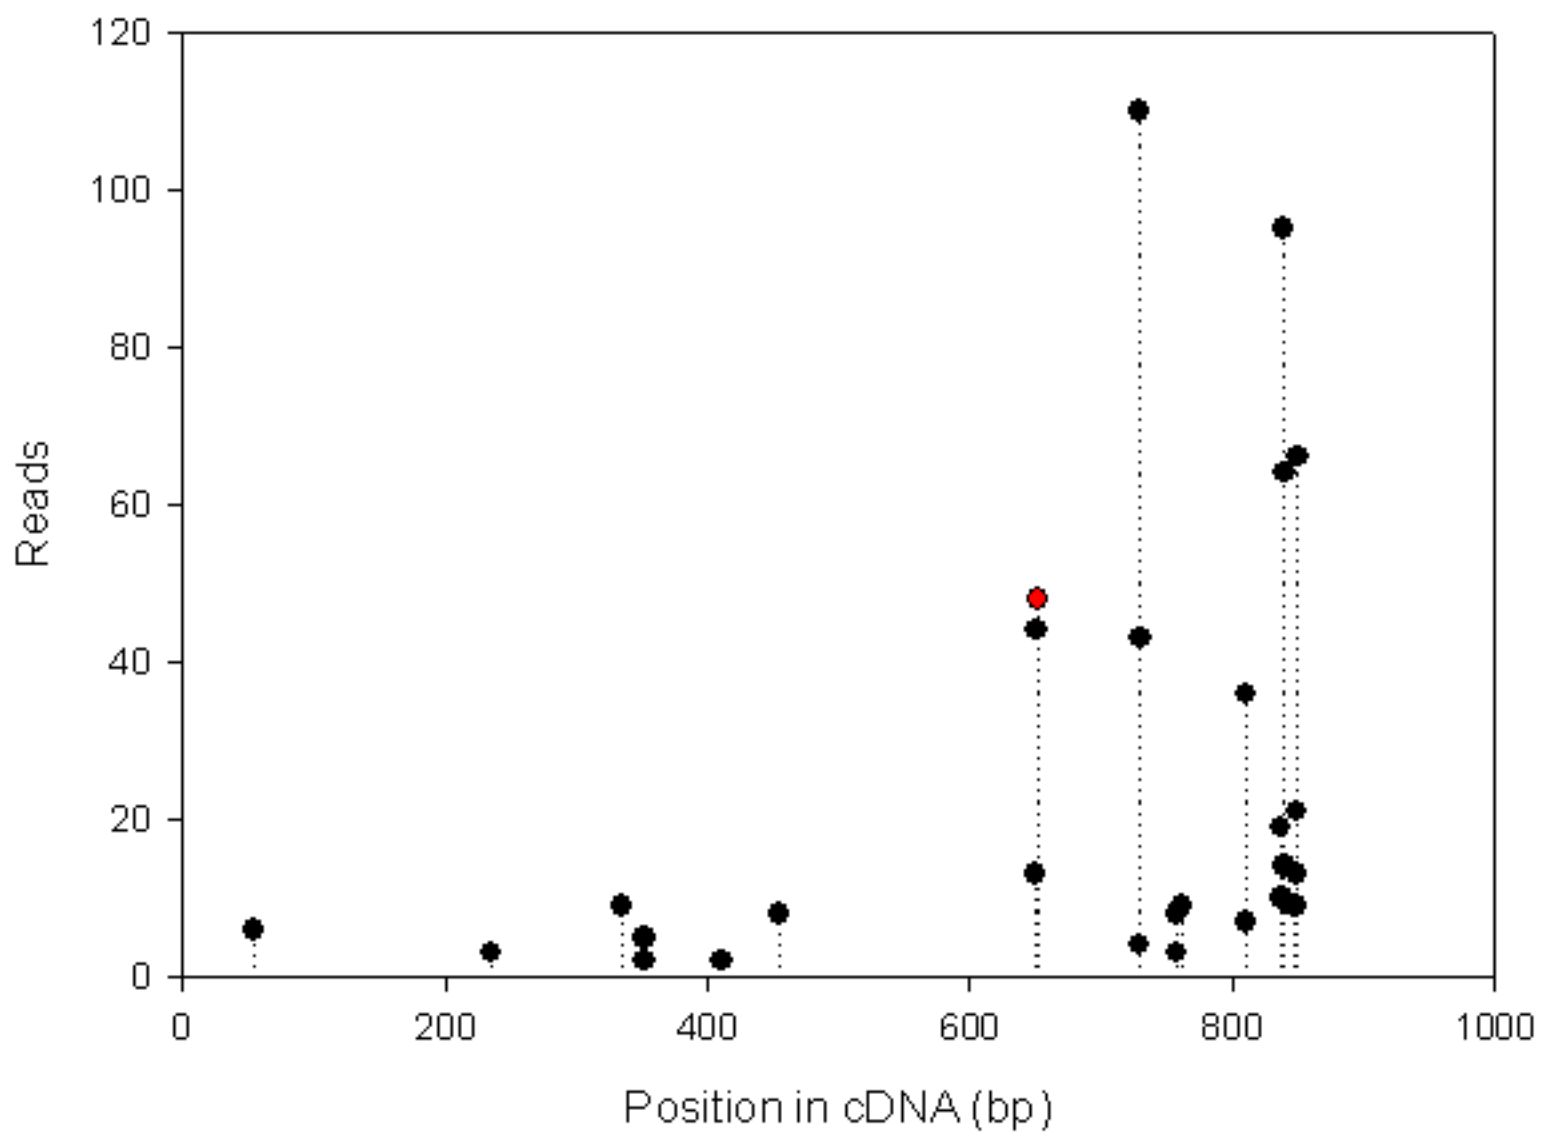

5' AGCUACUUG-CUAAAUGGGUAUGCUCU 3'

Orange1.1t00180.1

■ ■■■■ ■■■■■■■■■■

3' --GCAGAACGGAUUUACUCAUAG---- 5'

Csi-miR828

Csi-miR833.1, target=Cs9g02420.1 gene=Cs9g02420  
 Category=2  
 Score=4.5  
 Cleavage Site=936

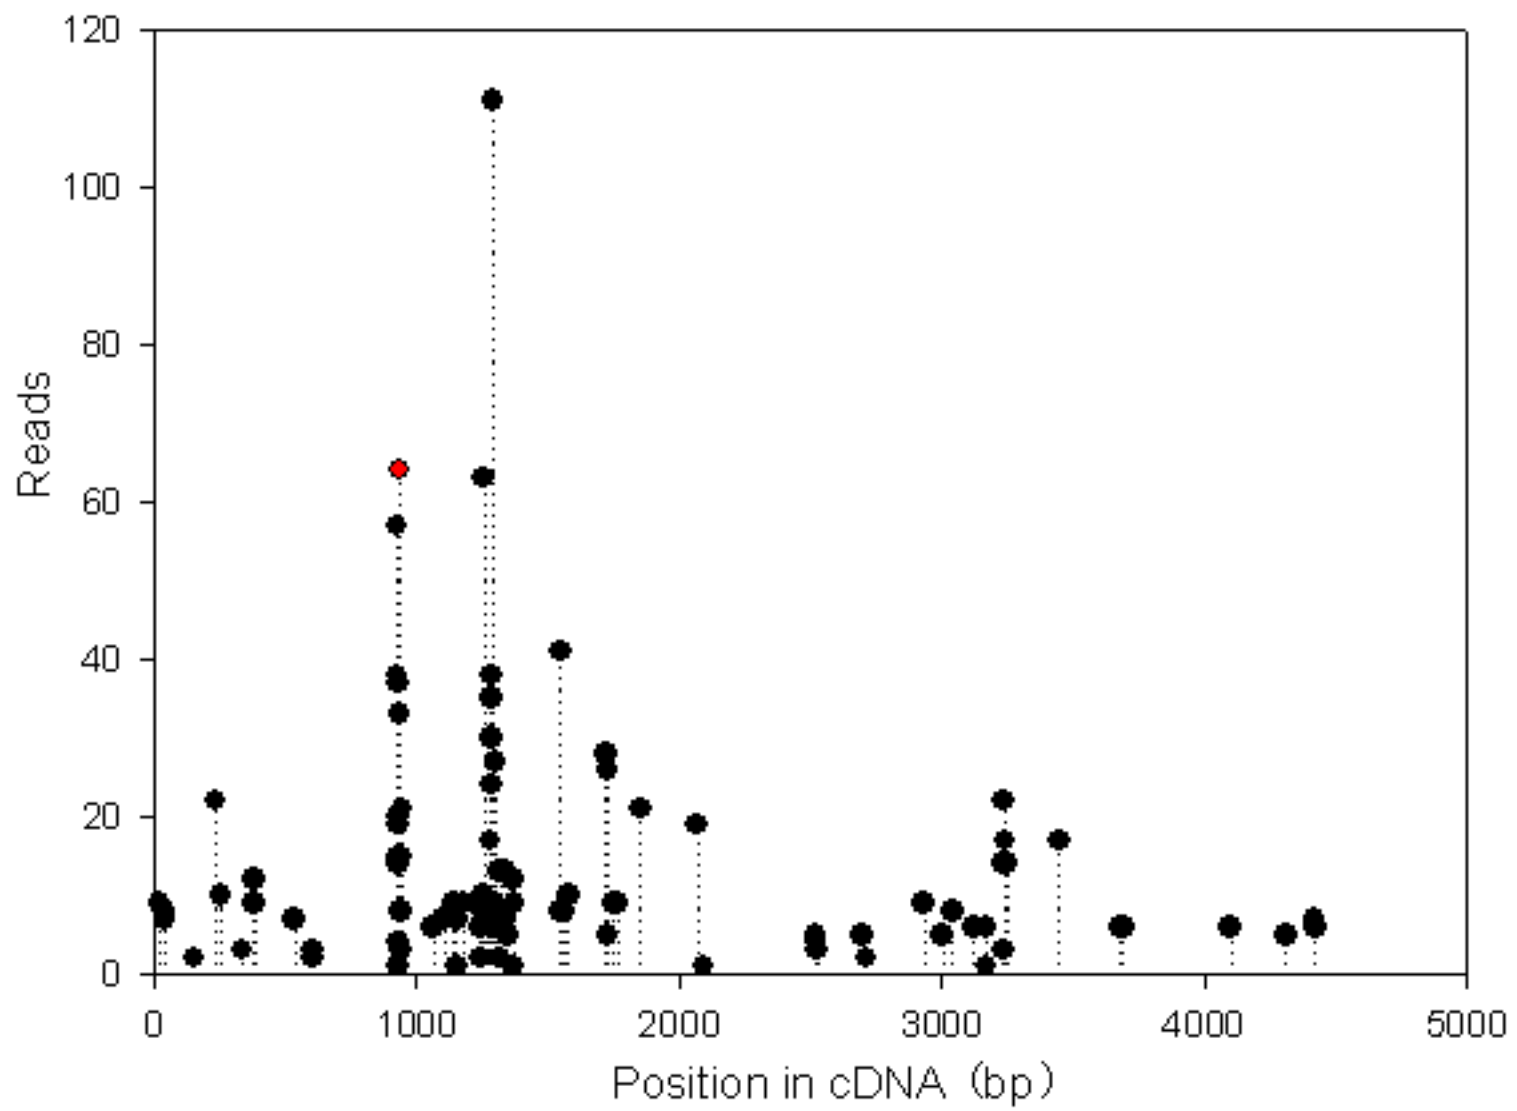

```

5' CUGUUCUGUA-CAACAAUAAAUUUUC 3'      Cs9g02420.1
   :: ..... ::::::::::::::
3' -ACUGGGUAUAGUUGUUAUUUA----- 5'    Csi-miR833.1

```

Csi-miRN01, target=Cs5g31745.1 gene=Cs5g31745  
 Category=3  
 Score=5  
 Cleavage Site=148

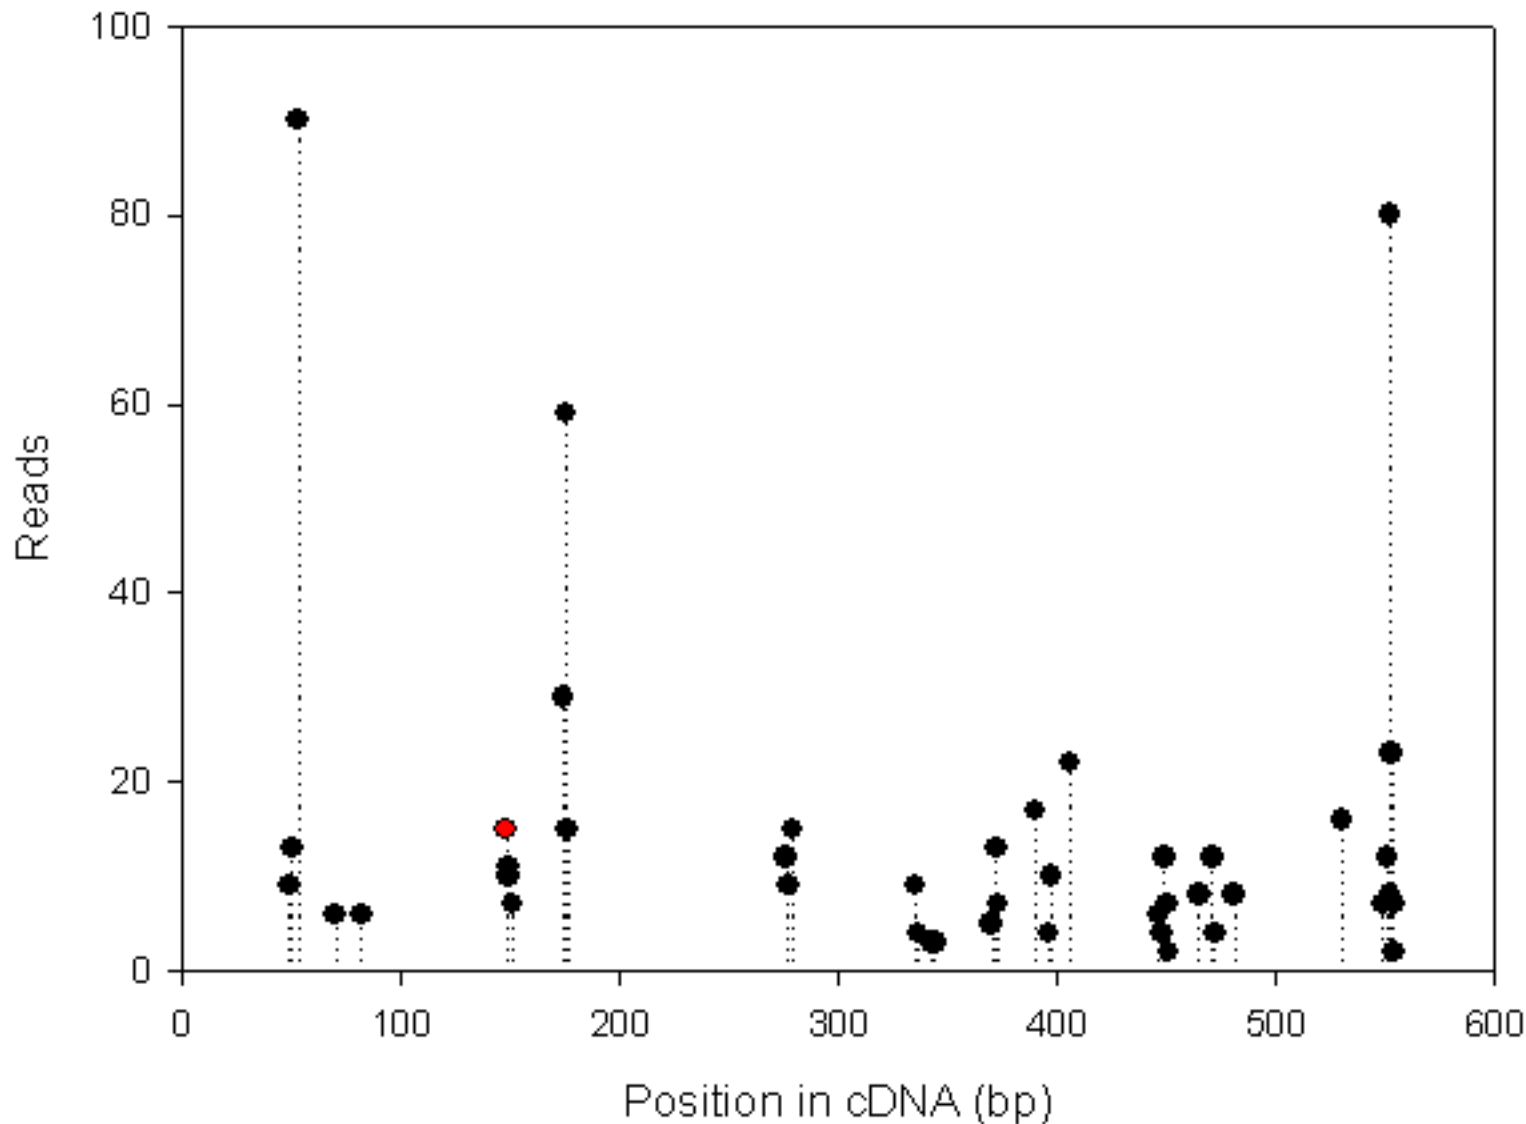

5' UGGUGGGCAGAGAAGUGACU-GUUGAG 3' Cs5g31745.1  
 : . . . . . :  
 3' ---AAUUGUCUUUCACUGAGCAA--- 5' Csi-miRN01

Csi-miRN02, target=Cs3g18790.1 gene=Cs3g18790  
 Category=2  
 Score=2  
 Cleavage Site=1819

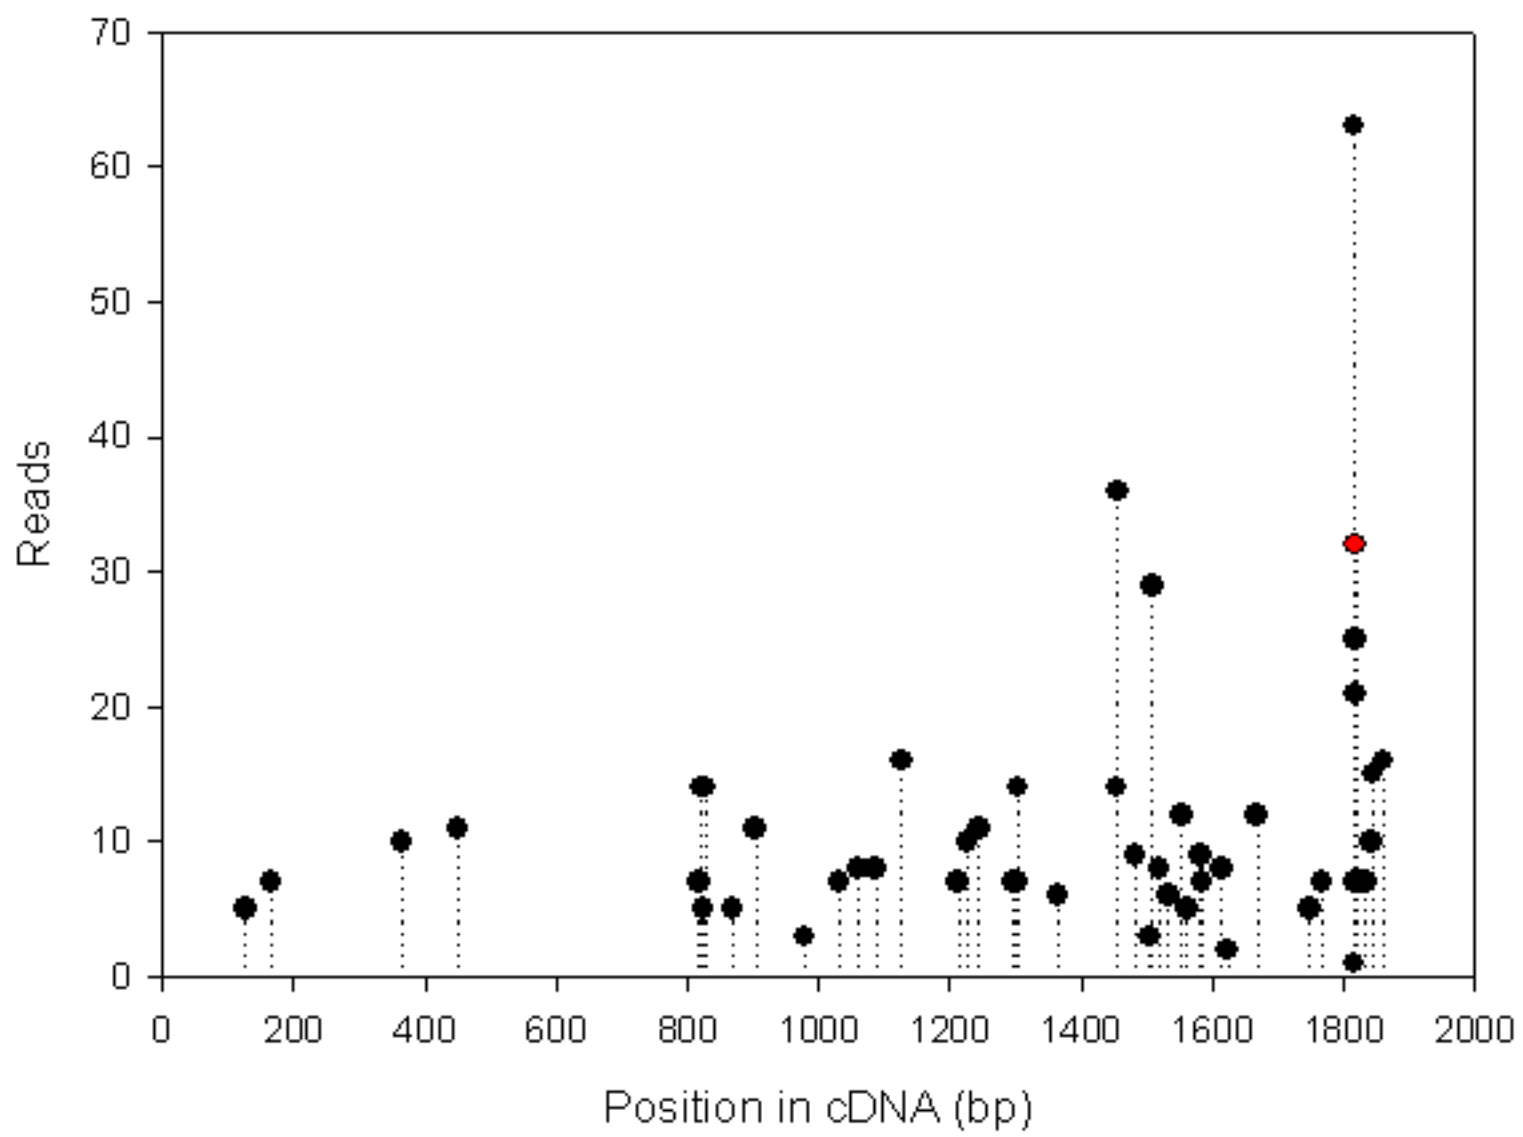

```

5' GCAACUGUGGCACGGUACCACAGUUG 3'      Cs3g18790.1
   :::::::::::::::::::: :::::
3' ----GACACCGUGCCAUGAUGUCA-- 5'      Csi-miRN02
  
```

Csi-miRN03, target=Cs5g26760.1 gene=Cs5g26760  
 Category=3  
 Score=5  
 Cleavage Site=457

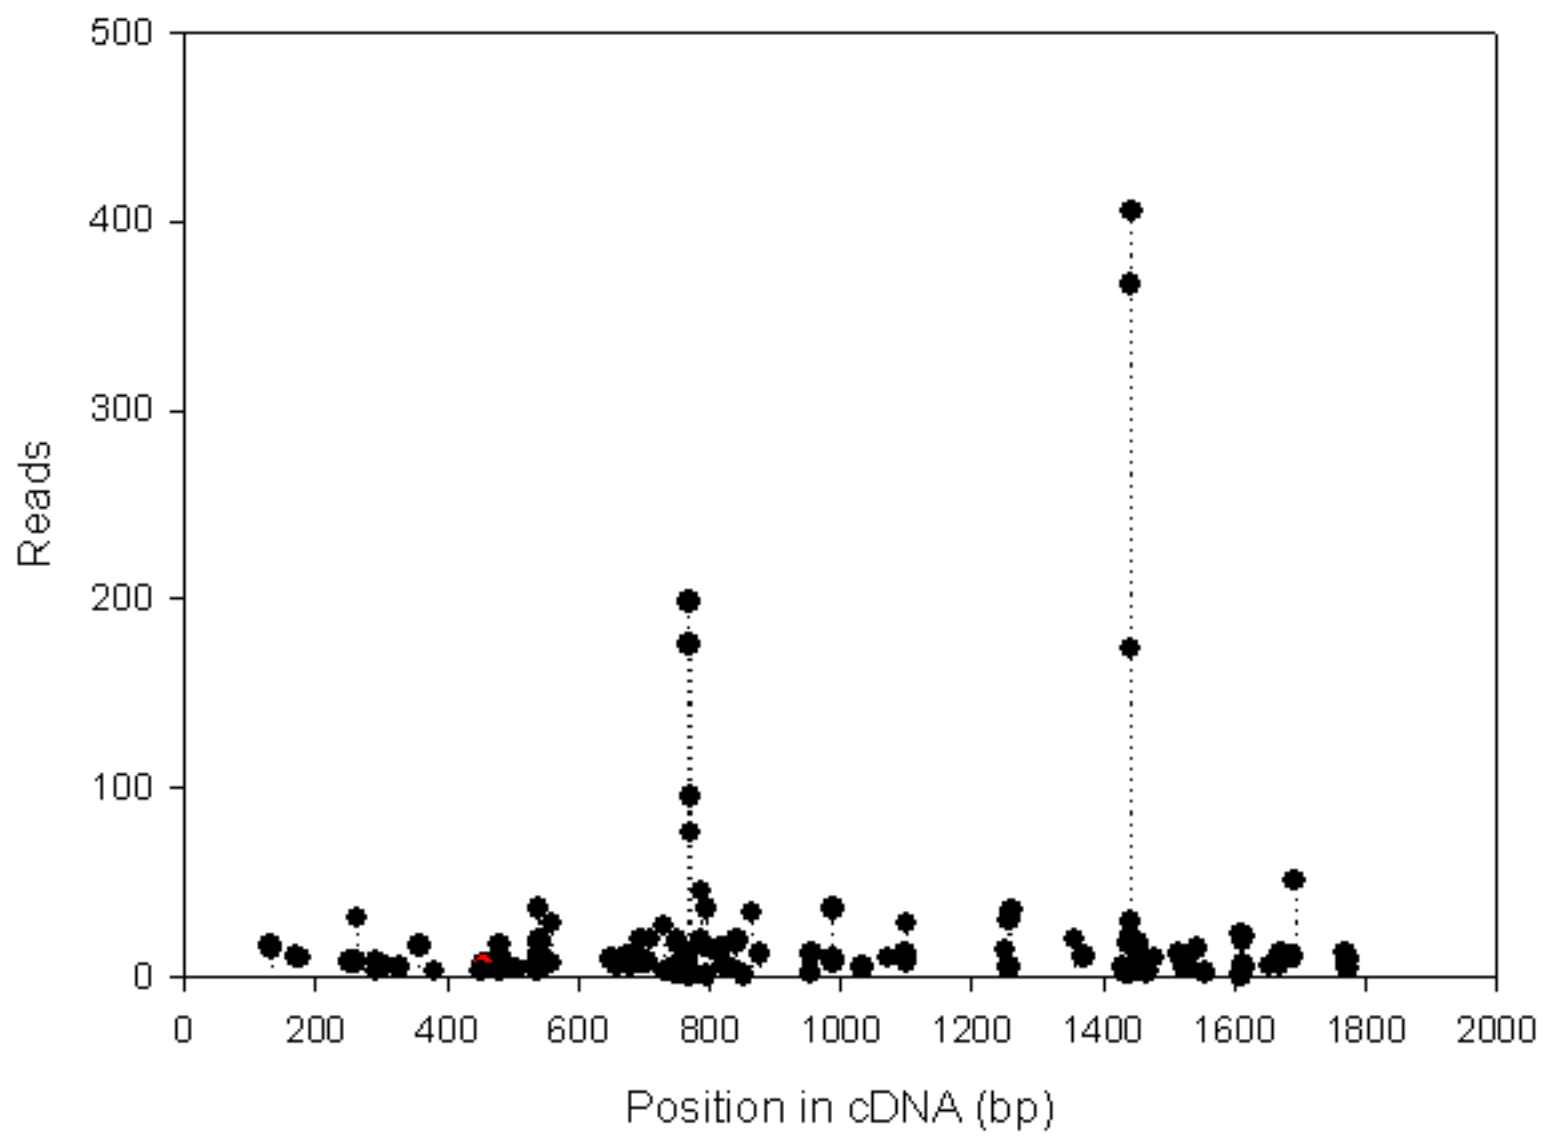

```

5' UAUAGACAACUUUUUCACCCAGAGCA 3'      Cs5g26760.1
   . : : : . . : : : : : : : : : : : :
3' ----UUGUGGGCAAAGUGGGUUUUGU 5'      Csi-miRN03

```

Csi-miRN04, target=Orange1.1t00471.1 gene=Orange1.1t00471  
 Category=4  
 Score=4  
 Cleavage Site=2386

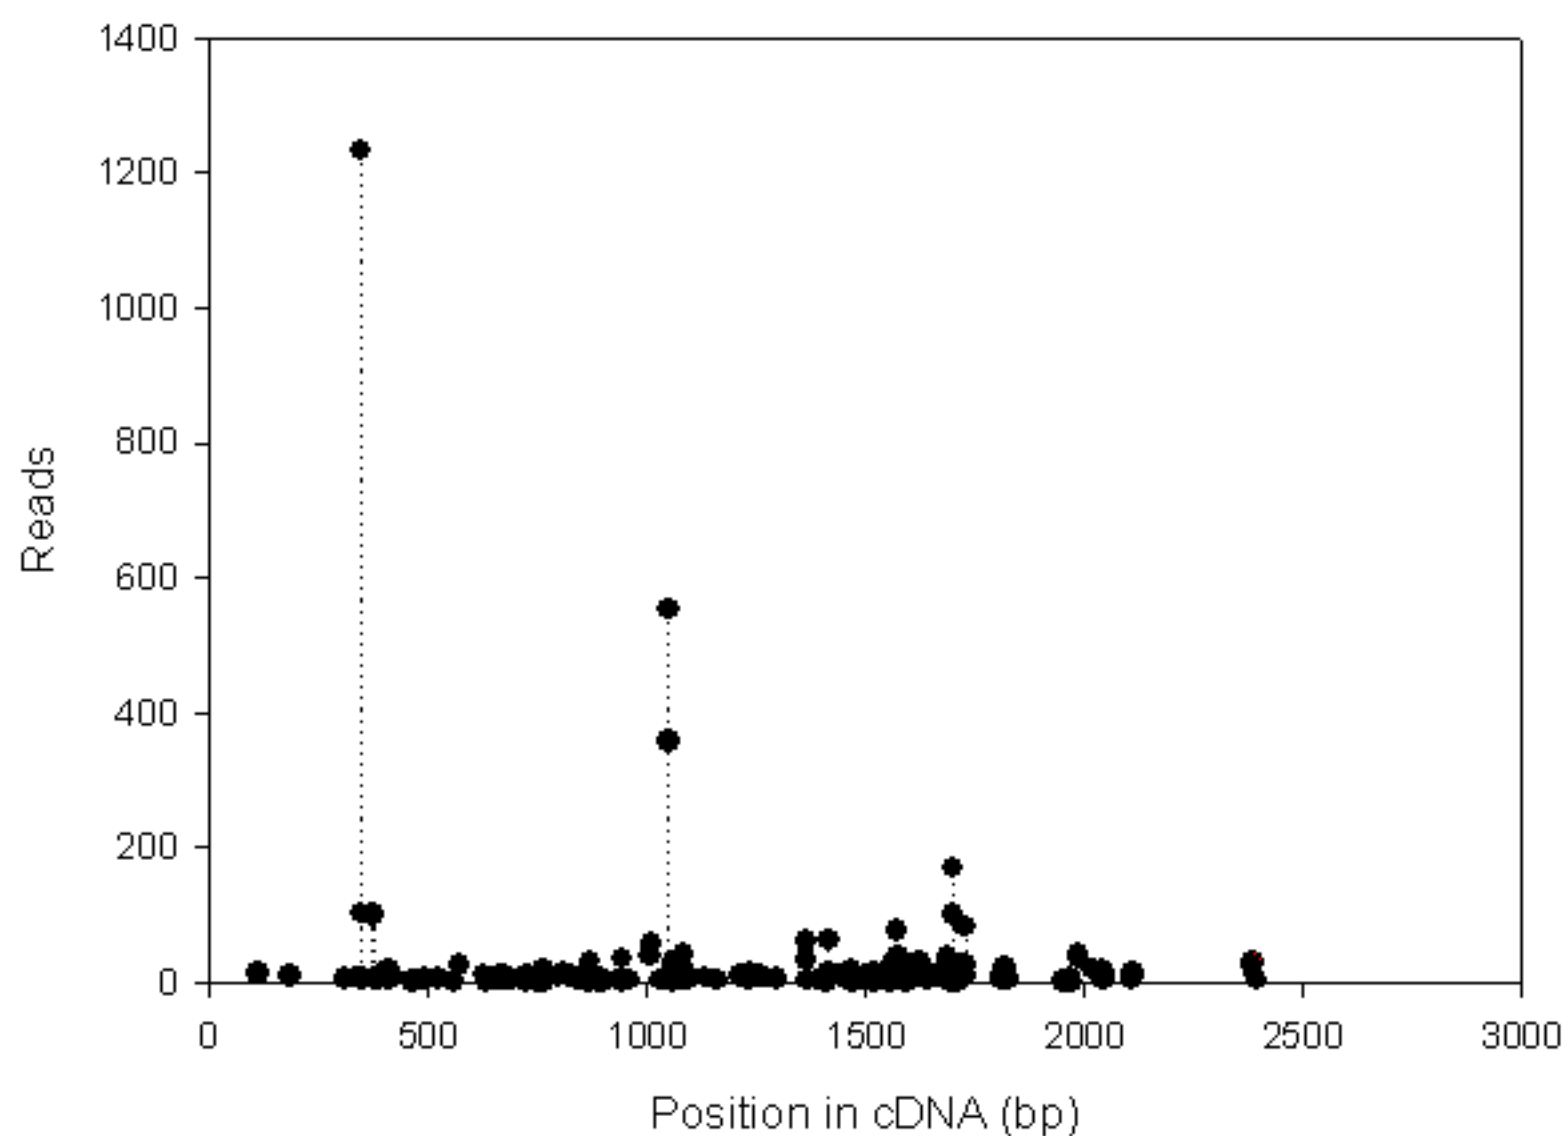

5' CAUGUAACAUAACAUAUUCACAA 3'

Orange1.1t00471.1

.....

3' --ACAUUGUAUGUGAGAGU--- 5'

Csi-miRN04



Csi-miRN05, target=Cs4g19940.1 gene=Cs4g19940  
 Category=3  
 Score=3.5  
 Cleavage Site=3041

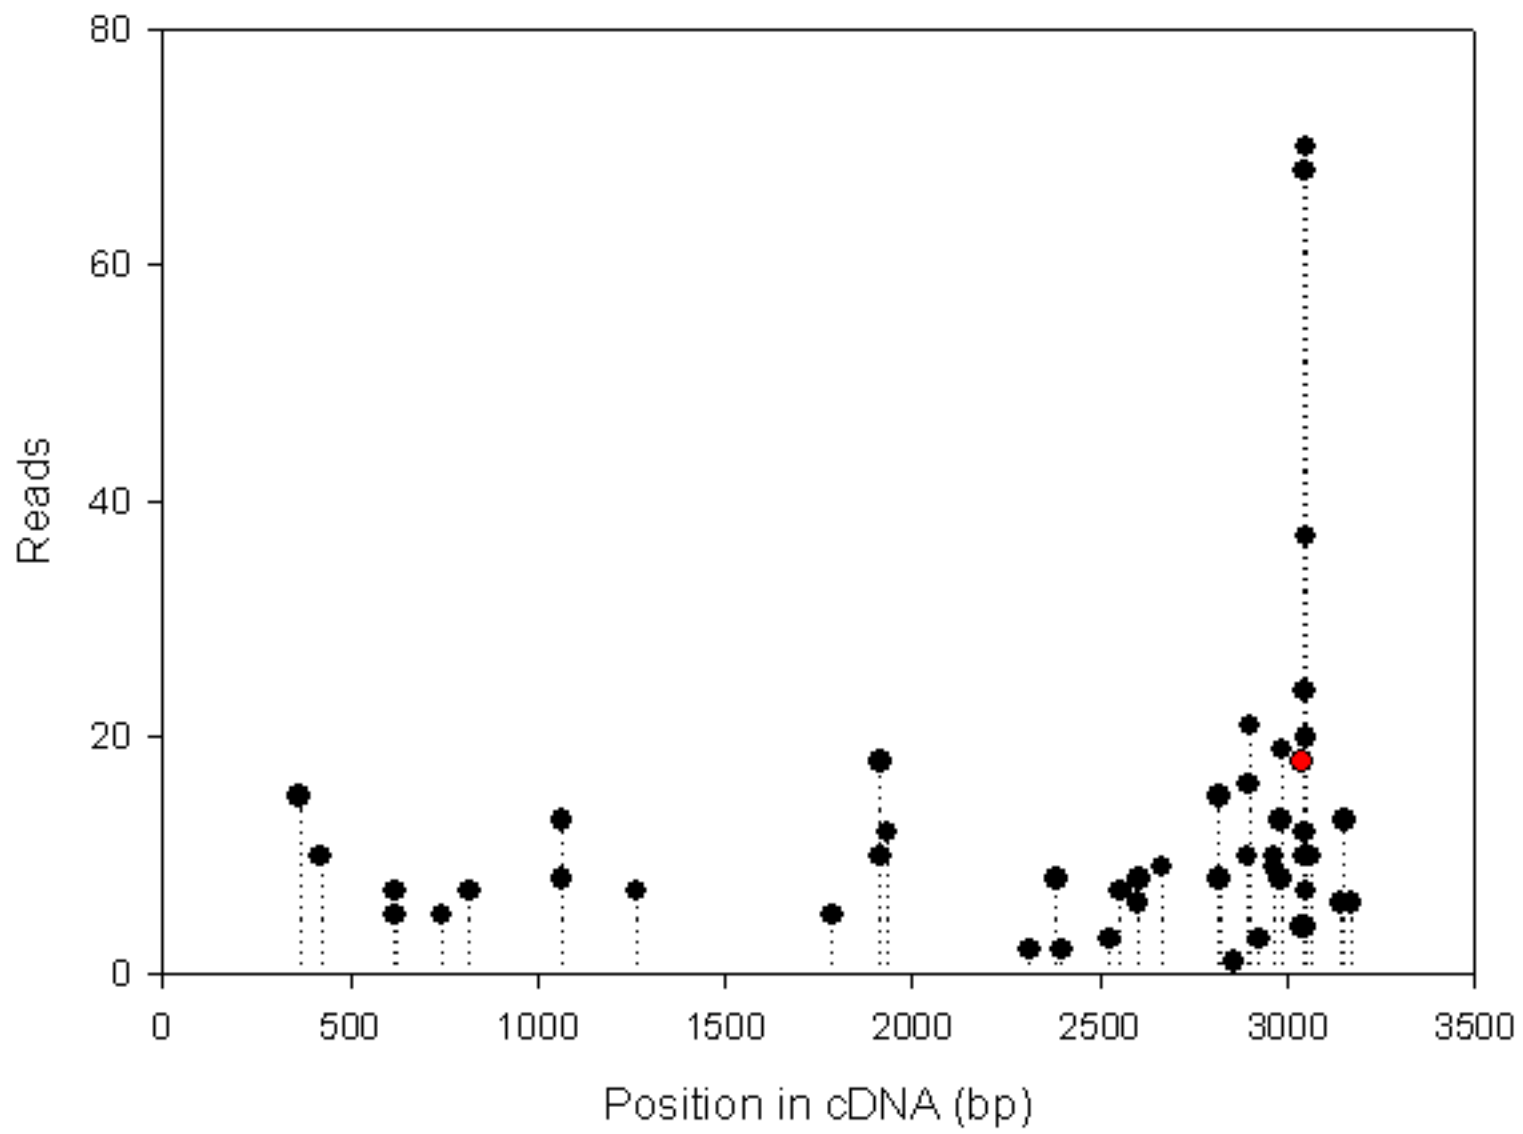

```

5' AAGCUAGGAAUGUAUCUUACAUAUA 3'      Cs4g19940.1
   : .....
3' -ACUCUCUUUACAUAAGAAUGUA----- 5'  Csi-miRN05
  
```

Csi-miRN07, target=Cs8g09620.1 gene=Cs8g09620  
 Category=1  
 Score=4  
 Cleavage Site=357

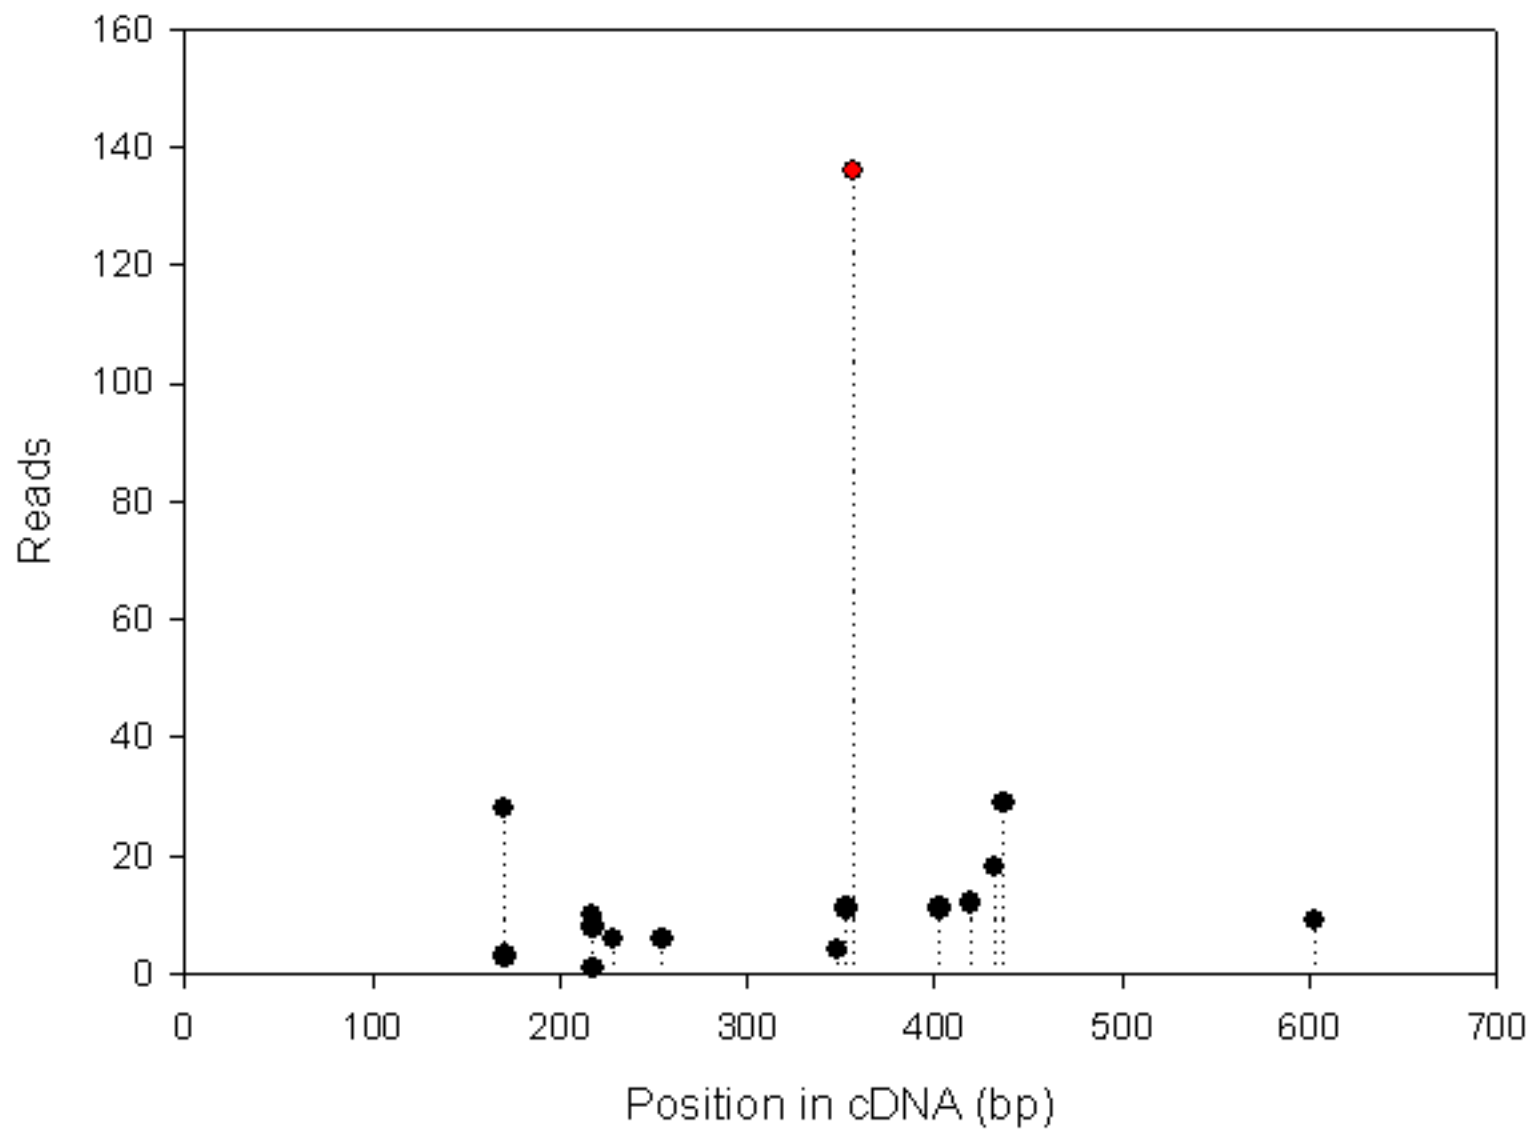

```

5' ACACCGUUUCAUCUUGUCCUCCAGAA 3'      Cs8g09620.1
   :::::::::: :::::::::: :::
3' -GUGGCAAACUAGAACAGAAGG----- 5'      Csi-miRN07
  
```

Csi-miRN10, target=Cs9g04330.1 gene=Cs9g04330  
 Category=3  
 Score=5  
 Cleavage Site=1822

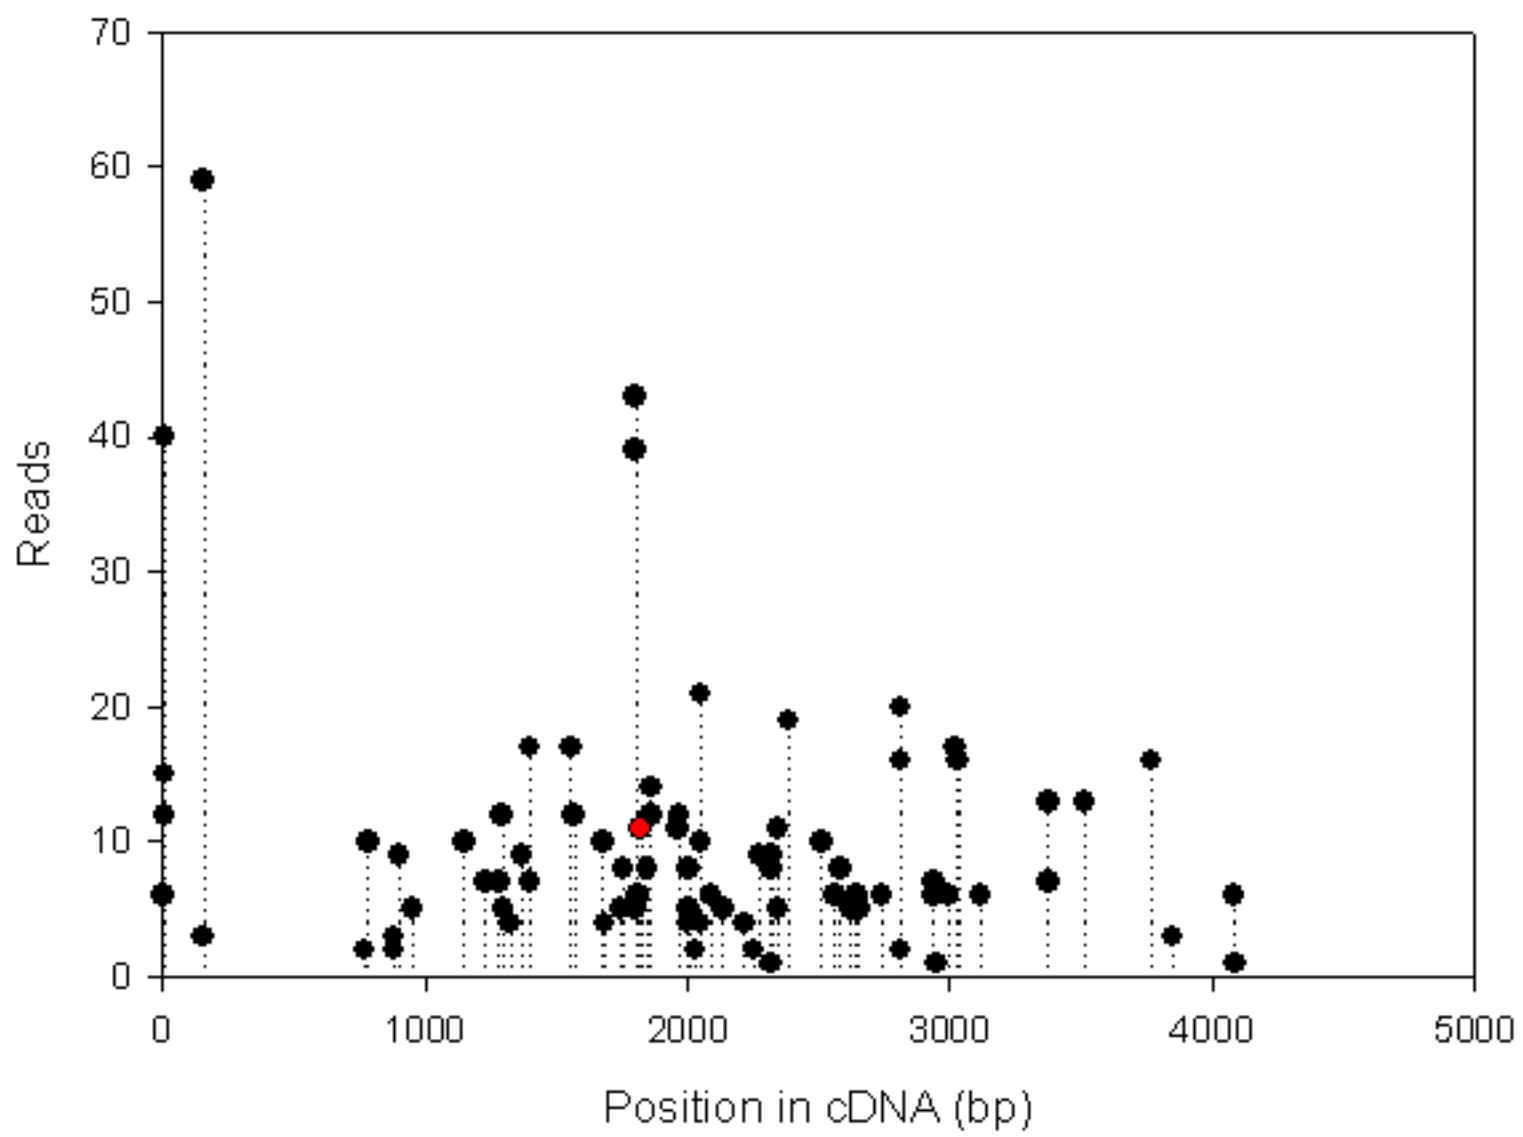

```

5' AUCAUGUGA-GCAUACACUCAAUACUU 3'      Cs9g04330.1
   : : : : . : : : : : : : : : :
3' ----ACAUUGUAUGUGUGAGUUAUU-- 5'      Csi-miRN10

```

Csi-miRN11, target=Cs8g13560.1 gene=Cs8g13560  
 Category=3  
 Score=2  
 Cleavage Site=302

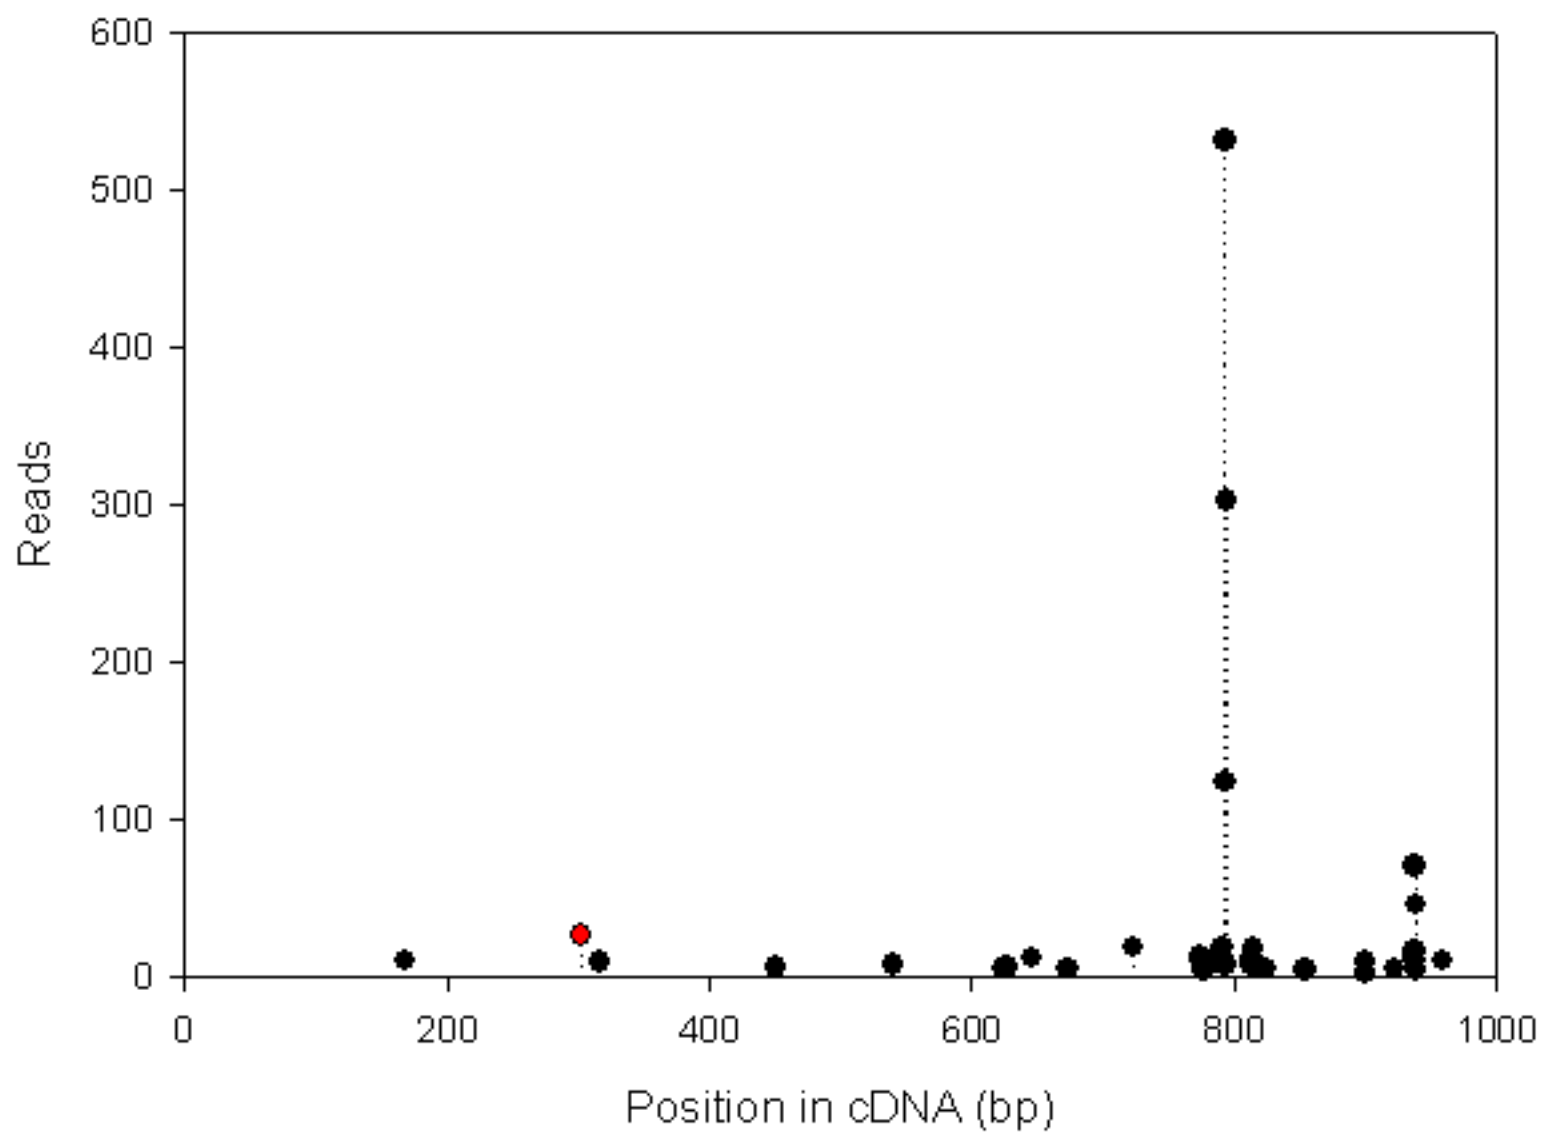

```

5' GUACCGUAAAAAGCUCCUGCGACAUG 3'      Cs8g13560.1
   ::::: ::::::::::::::::::::
3' -UUGGCAUCUUUCGAGGACGCU---- 5'      Csi-miRN11
  
```

Csi-miRN12, target=Cs4g06030.1 gene=Cs4g06030  
 Category=2  
 Score=5  
 Cleavage Site=2071

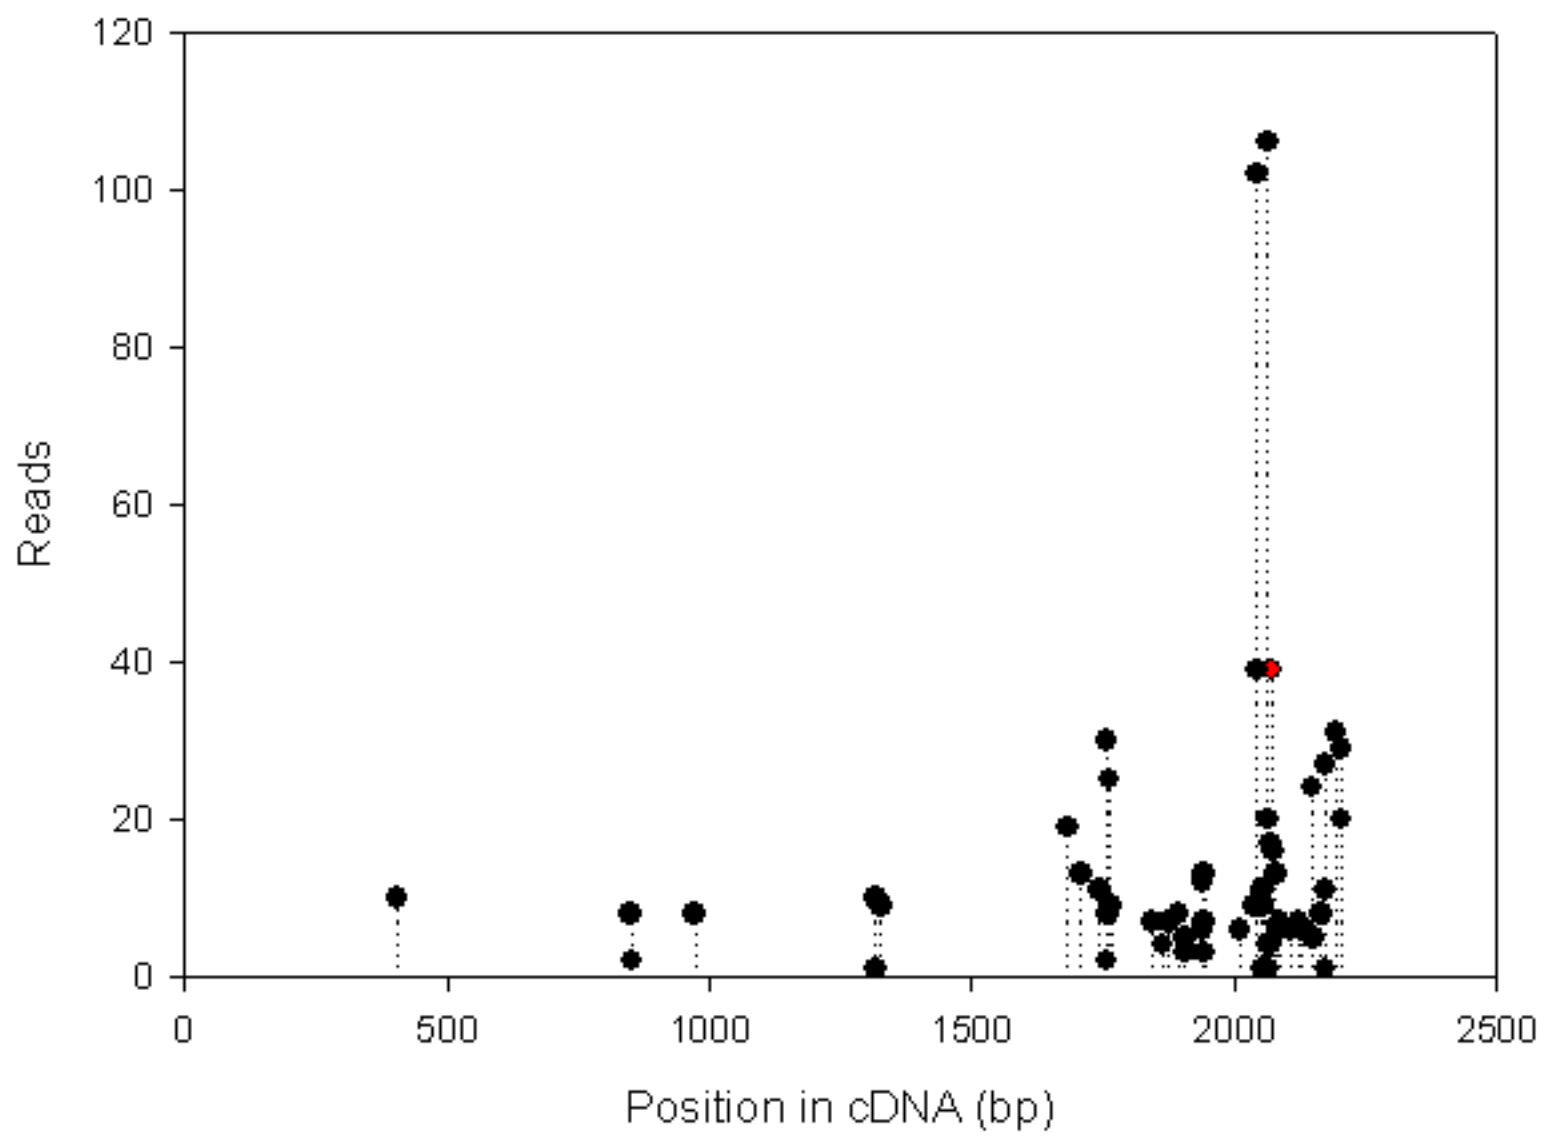

```

5'  UGAGCUCAGUGGCAUAGCCAUUGAAA  3'      Cs4g06030.1
      ::  ::::  :::::  :::::
3'  ---AGAAUCACGGUAUUGGUAACU--  5'      Csi-miRN12
  
```

Csi-miRN14, target=Cs7g14990.1 gene=Cs7g14990  
 Category=3  
 Score=4.5  
 Cleavage Site=2345

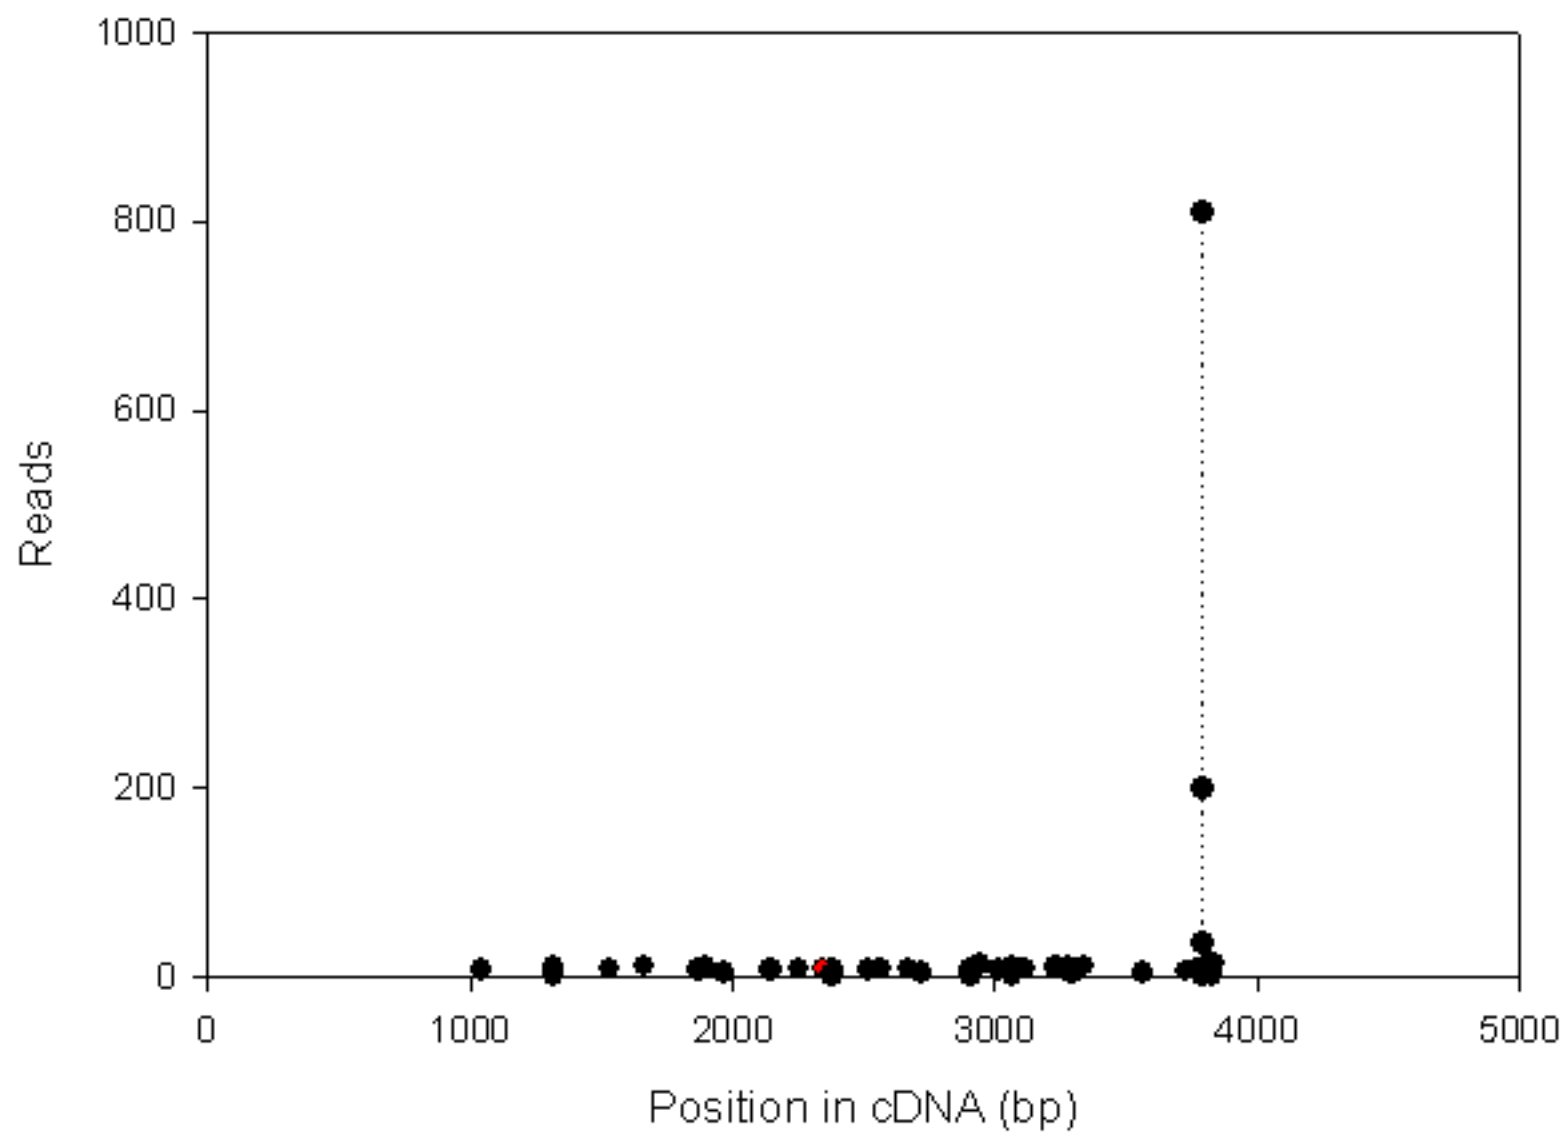

```

5' GAUGAAUAUUU-UUAUCAGGACUAUGA 3'      Cs7g14990.1
   : : : : . : : : : : : : : : : :
3' ---CUUAAGAAUAAUAGUUCUGAUACG 5'      Csi-miRN14
  
```

Csi-miRN16, target=Cs7g06555.1 gene=Cs7g06555  
 Category=3  
 Score=5  
 Cleavage Site=132

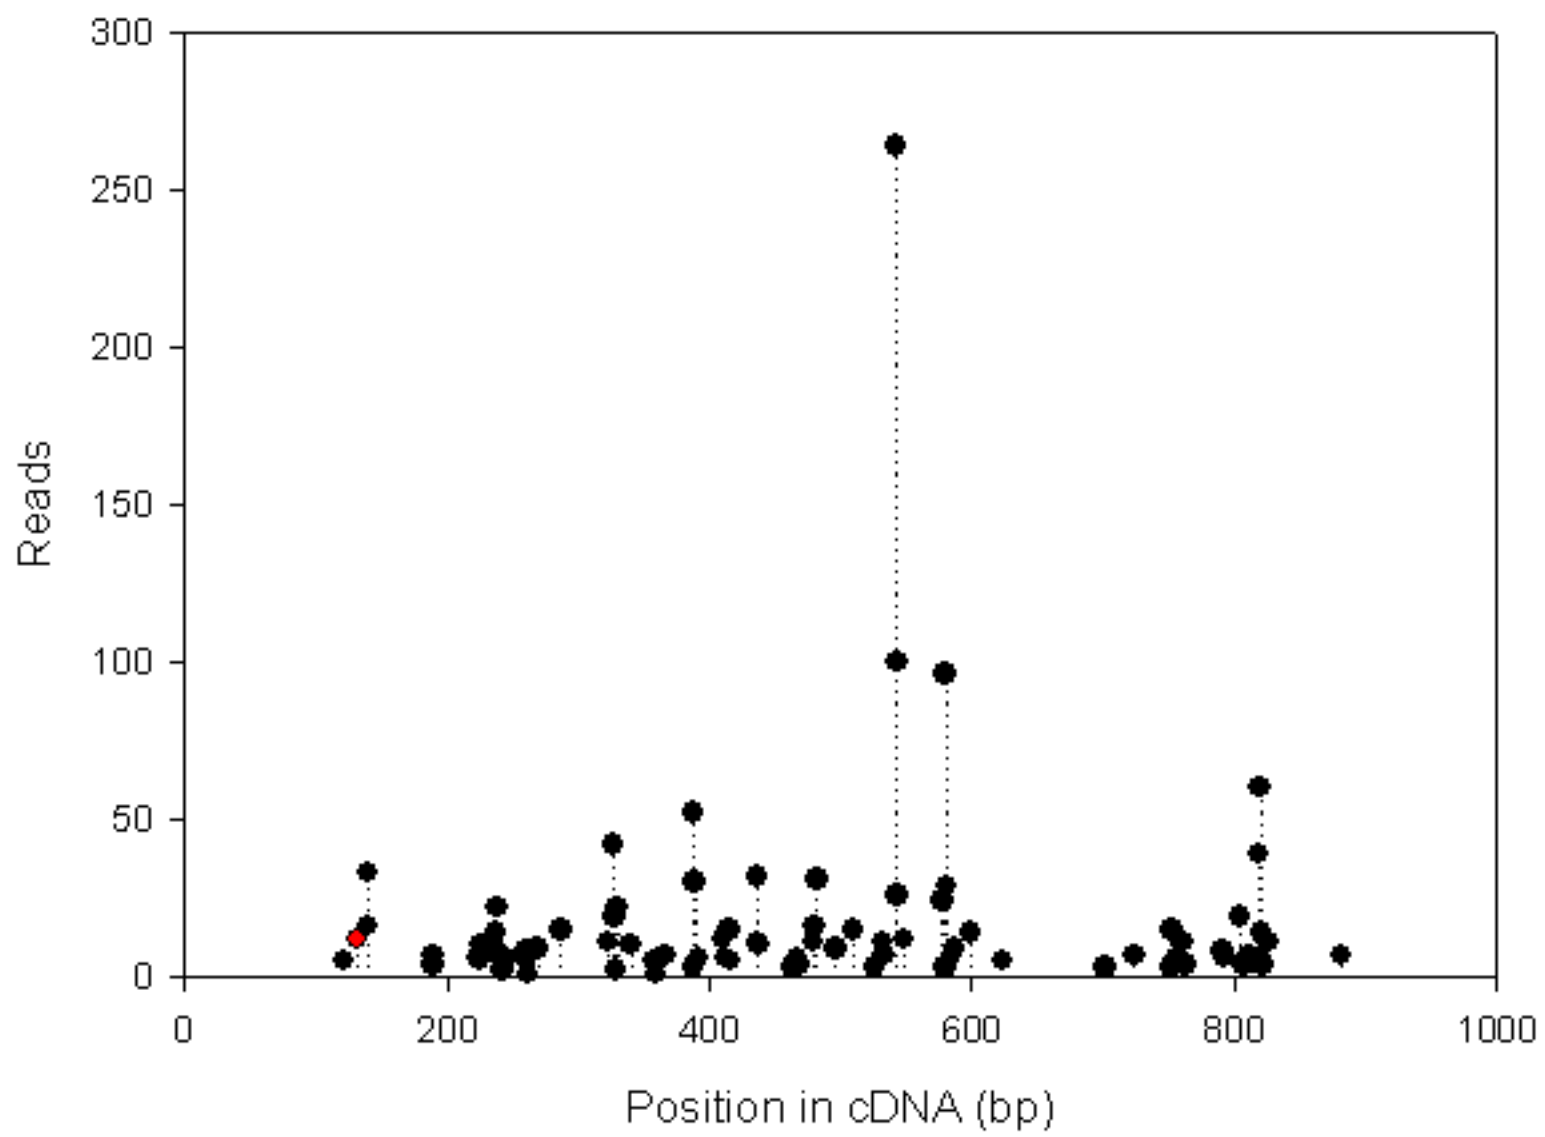

```

5' CCUUCAUUUUUUUGUUCUCUUAUCAGC 3'      Cs7g06555.1
   .. : : : : : : : : : : : : : :
3' ----AUAGUAAGCGAGAGAGUAGUC- 5'      Csi-miRN16

```

Csi-miRN17, target=Orange1.1t00471.1 gene=Orange1.1t00471  
 Category=3  
 Score=2  
 Cleavage Site=2386

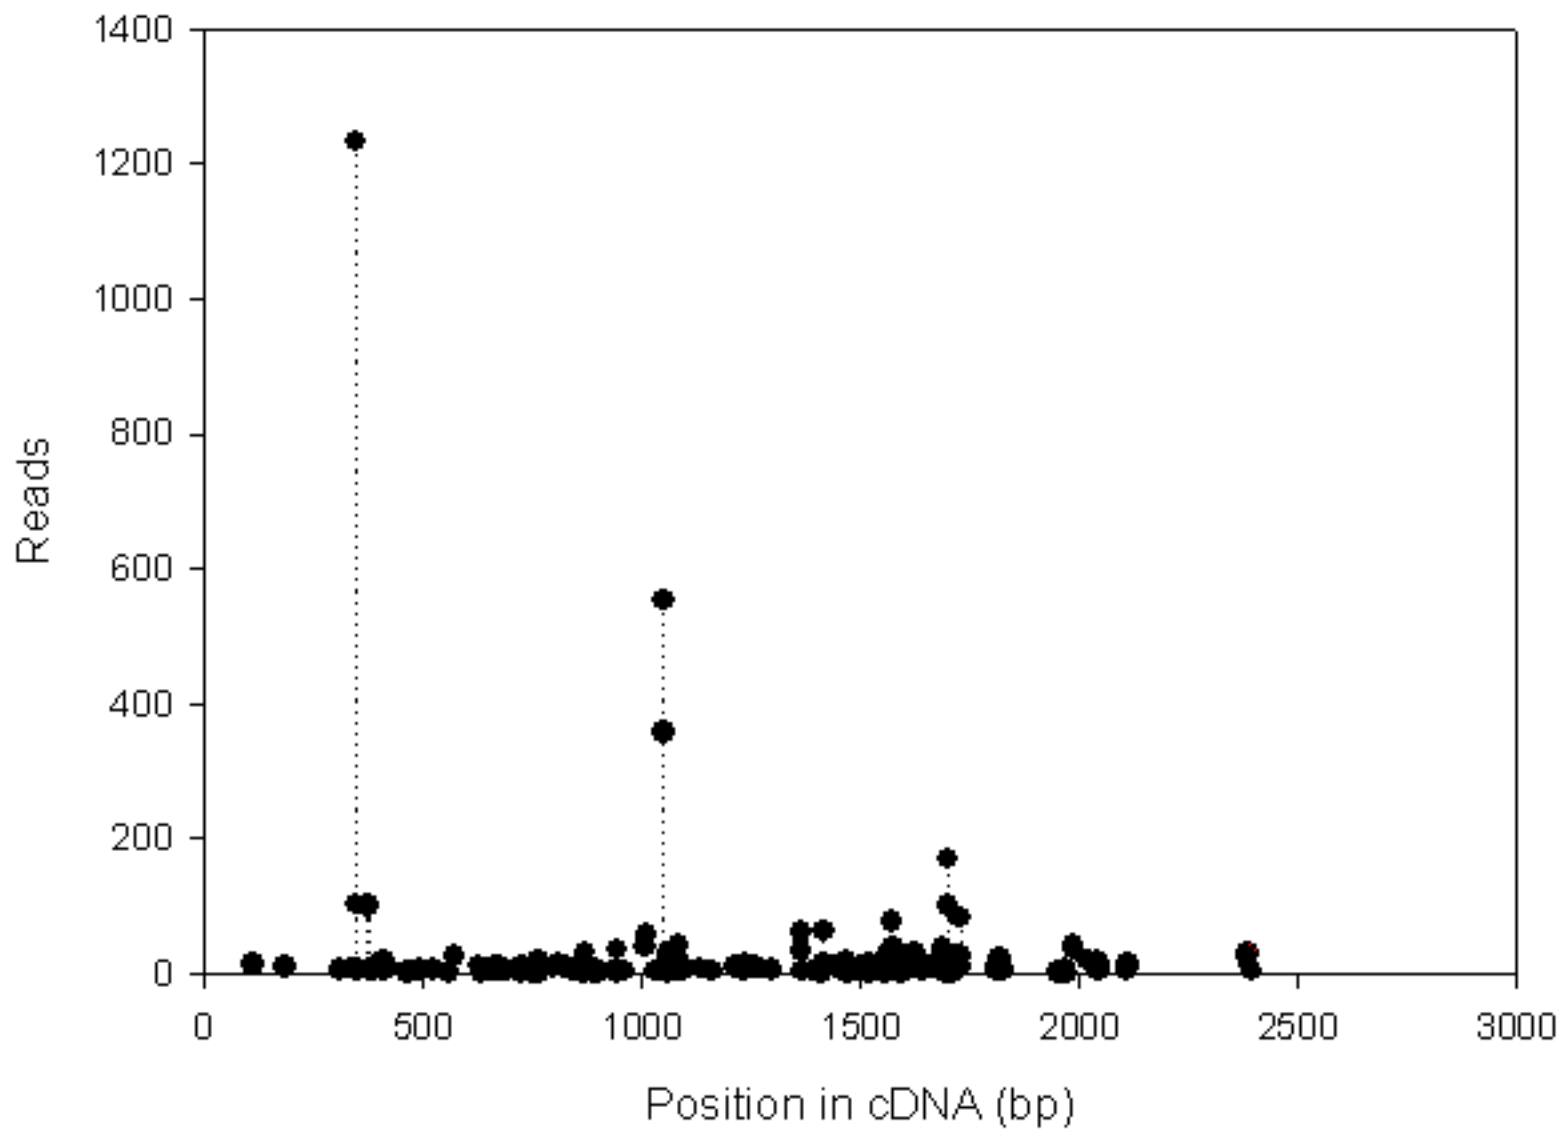

```

5' CAUGUAACAUAACAUAUCCACAACAA 3'      Orange1.1t00471.1
   ::::::::::::::::::::::::::::
3' --ACAUUGUAUGUGUGAGGUGUU--- 5'      Csi-miRN17
  
```



Csi-miRN18, target=Cs7g24200.1 gene=Cs7g24200  
 Category=3  
 Score=5  
 Cleavage Site=1104

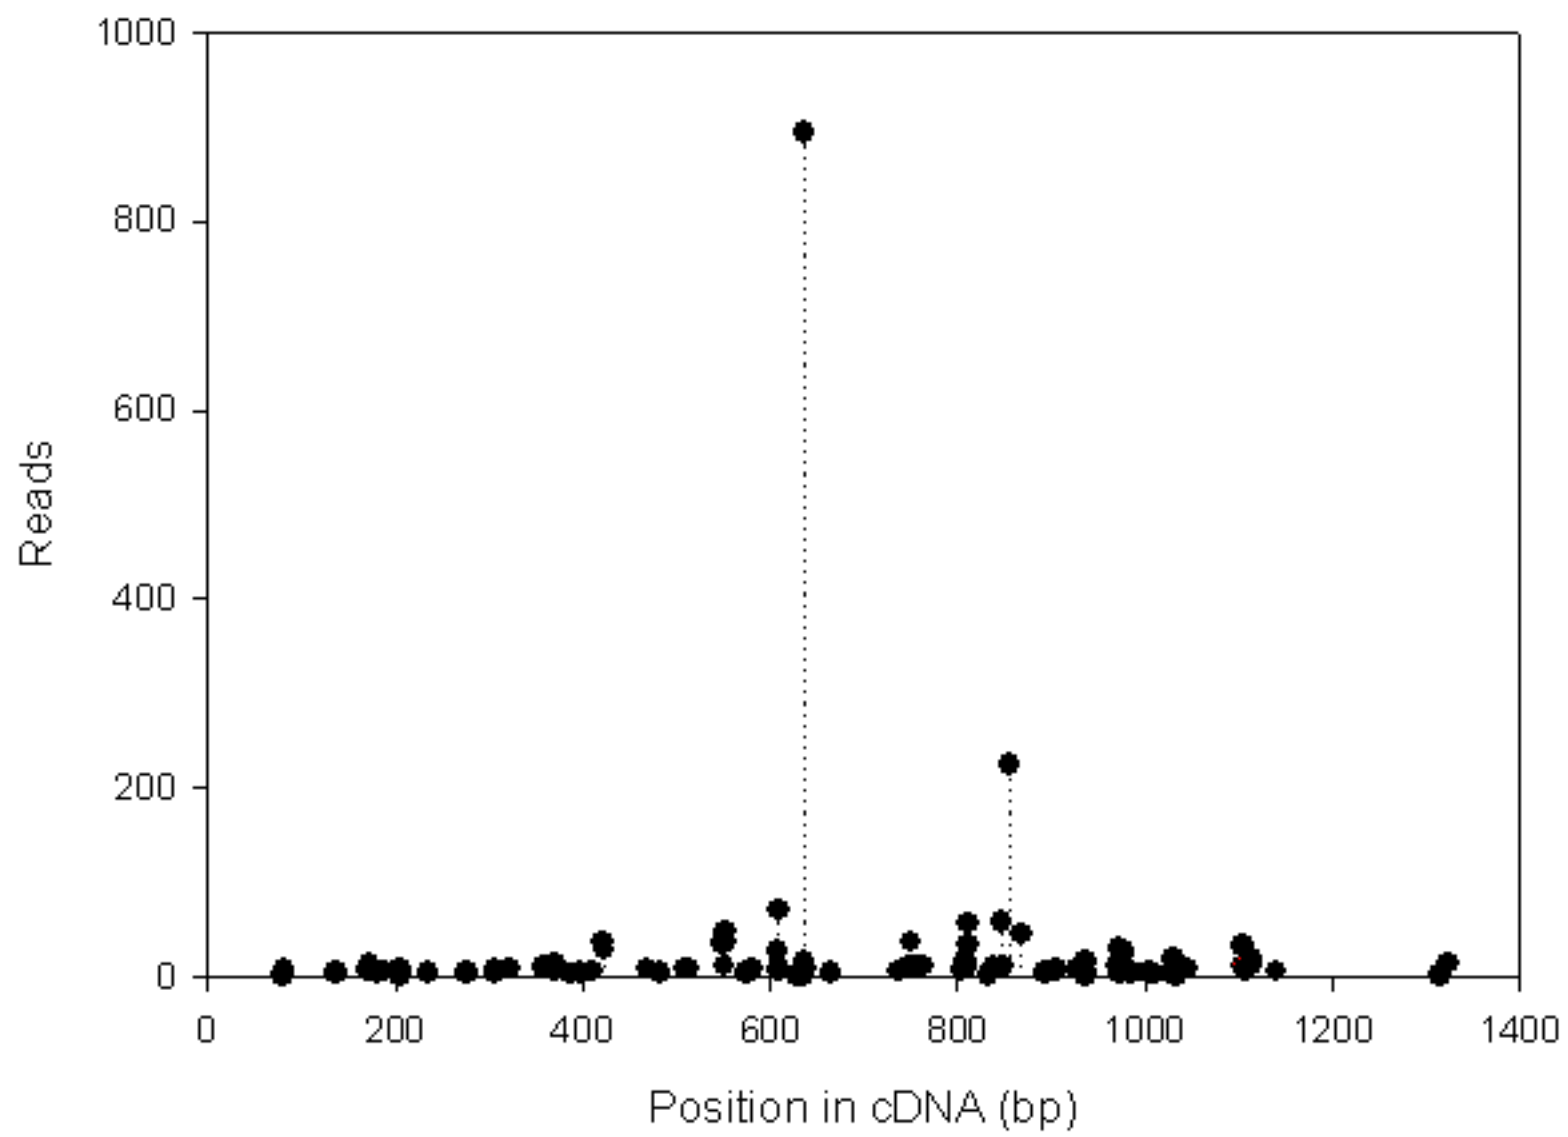

```

5' CAUAAUAGGGUUGCAUCCAGUUAGGA 3'      Cs7g24200.1
  :  :  .:  .:  .:  .:  .:  .:  .:  .:
3' GCAUGGUGUCAACGUAGGUCG----- 5'      Csi-miRN18
  
```

Csi-miRN19, target=Cs5g32800.1 gene=Cs5g32800  
 Category=3  
 Score=5  
 Cleavage Site=1085

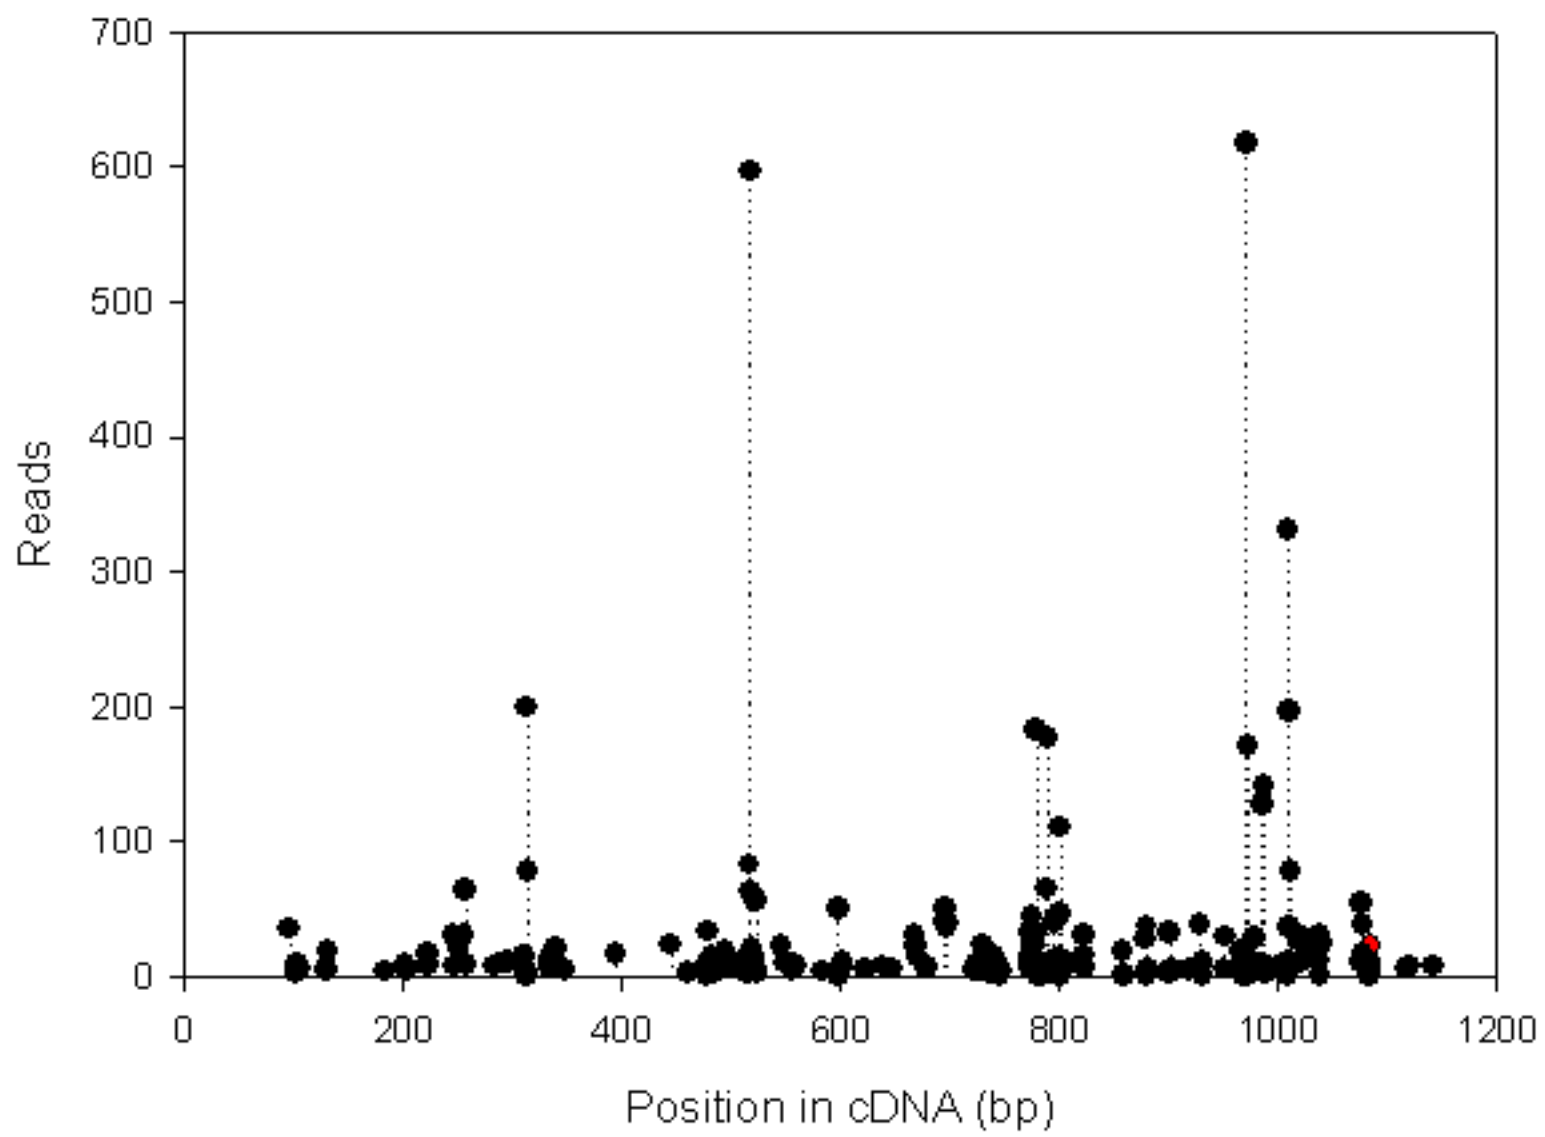

```

5' UAAAUUUUAG-UAUUCA AUGAACGACU 3' Cs5g32800.1
   : : : : : : : : : : : : : : :
3' -----AAAUCUCA AAGUUGCUUGCUU- 5' Csi-miRN19
  
```

Csi-miRN20, target=Cs3g05320.1 gene=Cs3g05320  
 Category=3  
 Score=0  
 Cleavage Site=451

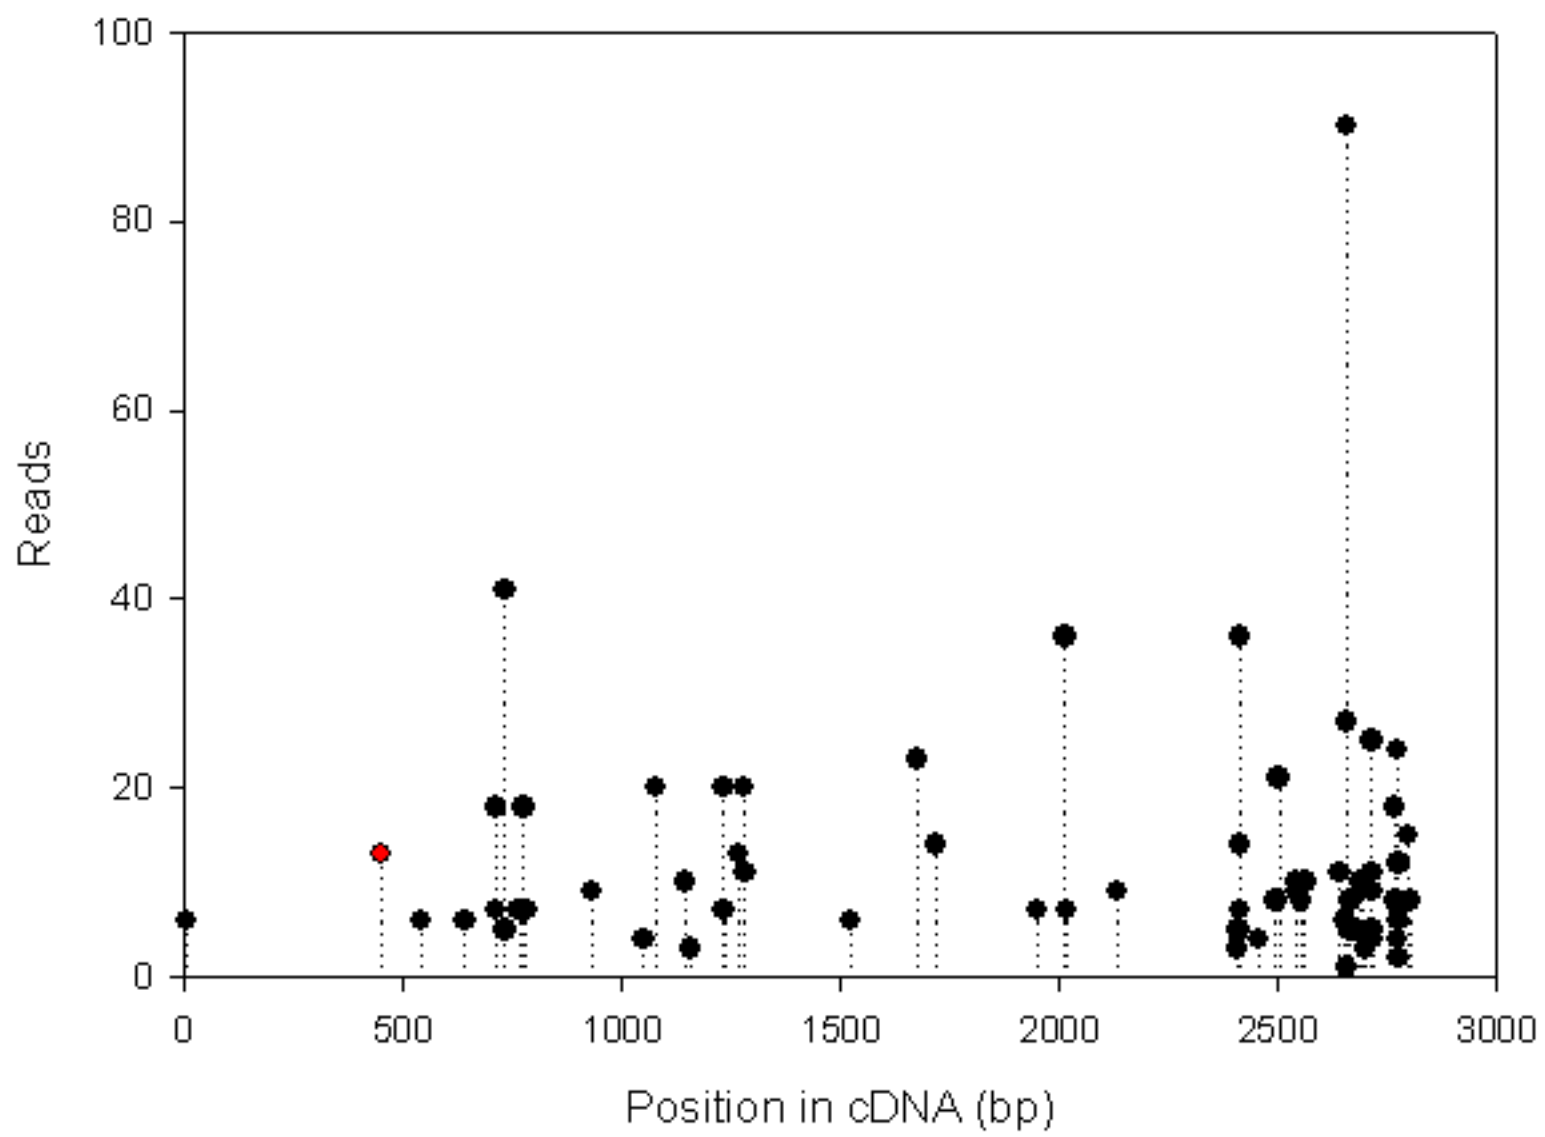

```

5' UUAUCAGCAUCAUGCAACAAAUAAGU 3'      Cs3g05320.1
   .....
3' AAUAGUCGUAGUACGUUGUUUU----- 5'    Csi-miRN20

```

Csi-miRN23, target=Cs1g07330.1 gene=Cs1g07330  
 Category=3  
 Score=5  
 Cleavage Site=130

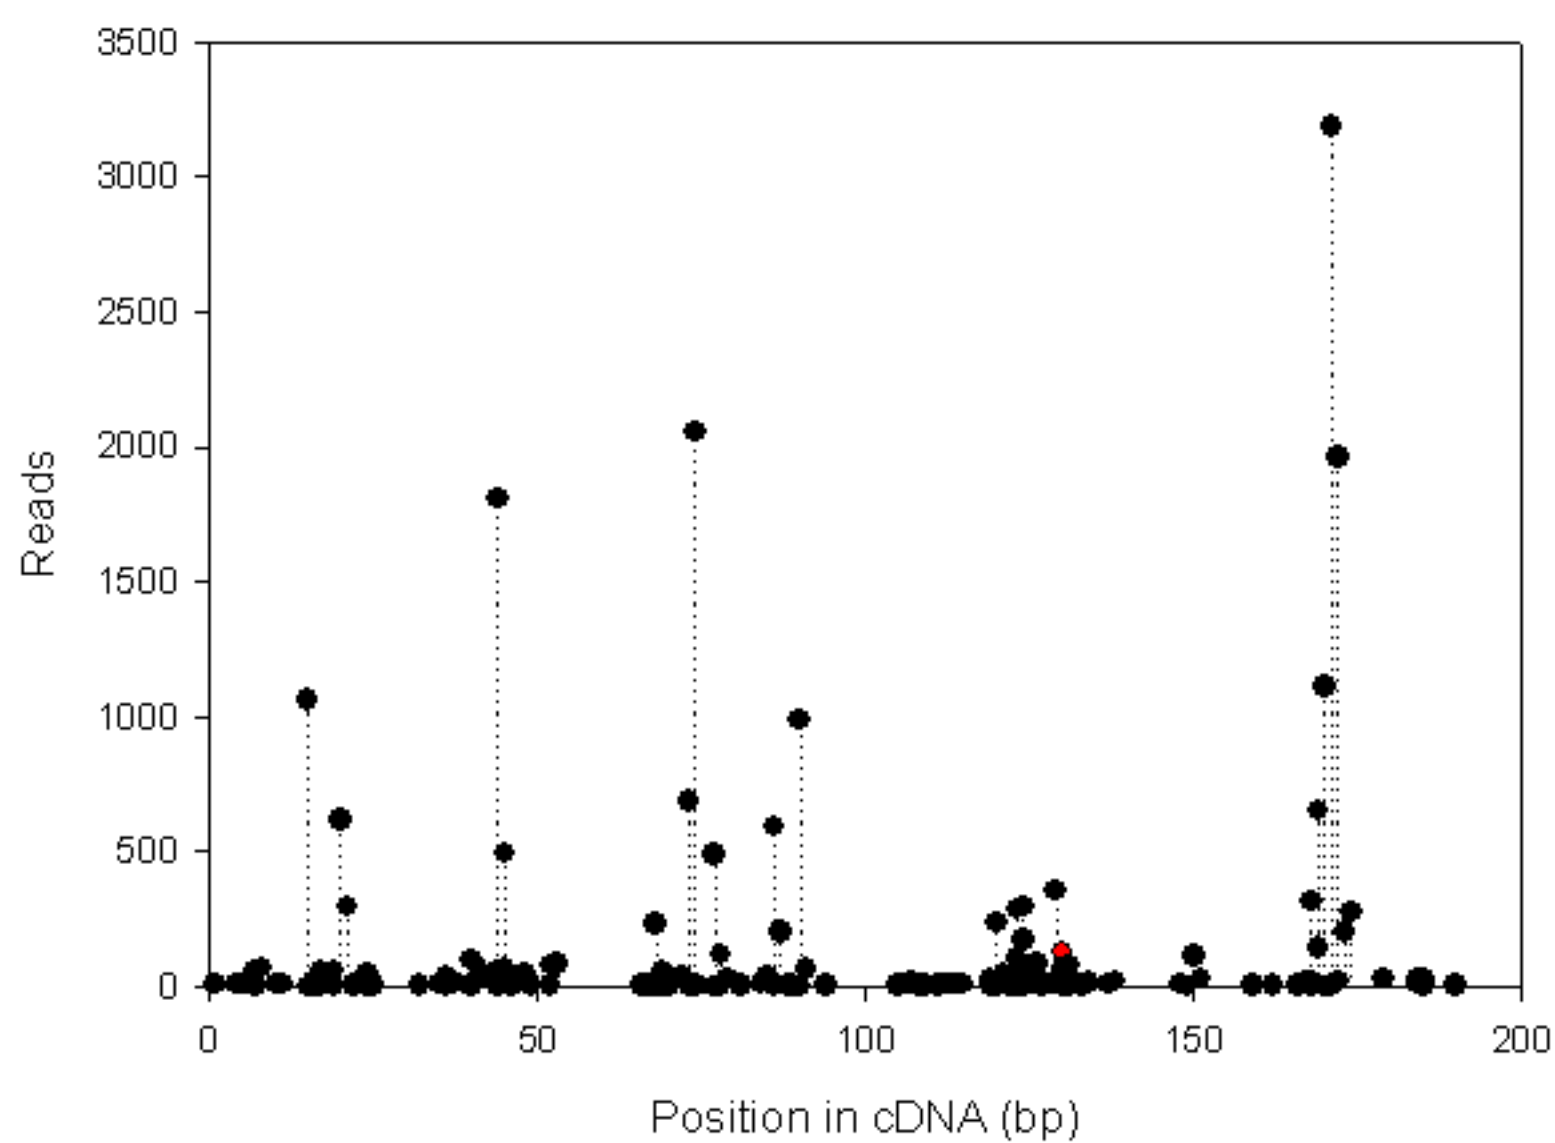

```

5'  GUCAUGGACGUU-CAGGCUGCUGAGAC  3'      Cs1g07330.1
      .....  :~::~:~::~:~::~:~::~:~::~:
3'  -----CUGCGGCCUCCGACGACUUUC  5'      Csi-miRN23
  
```

Csi-miRN24, target=Cs4g01970.1 gene=Cs4g01970  
 Category=3  
 Score=4.5  
 Cleavage Site=2471

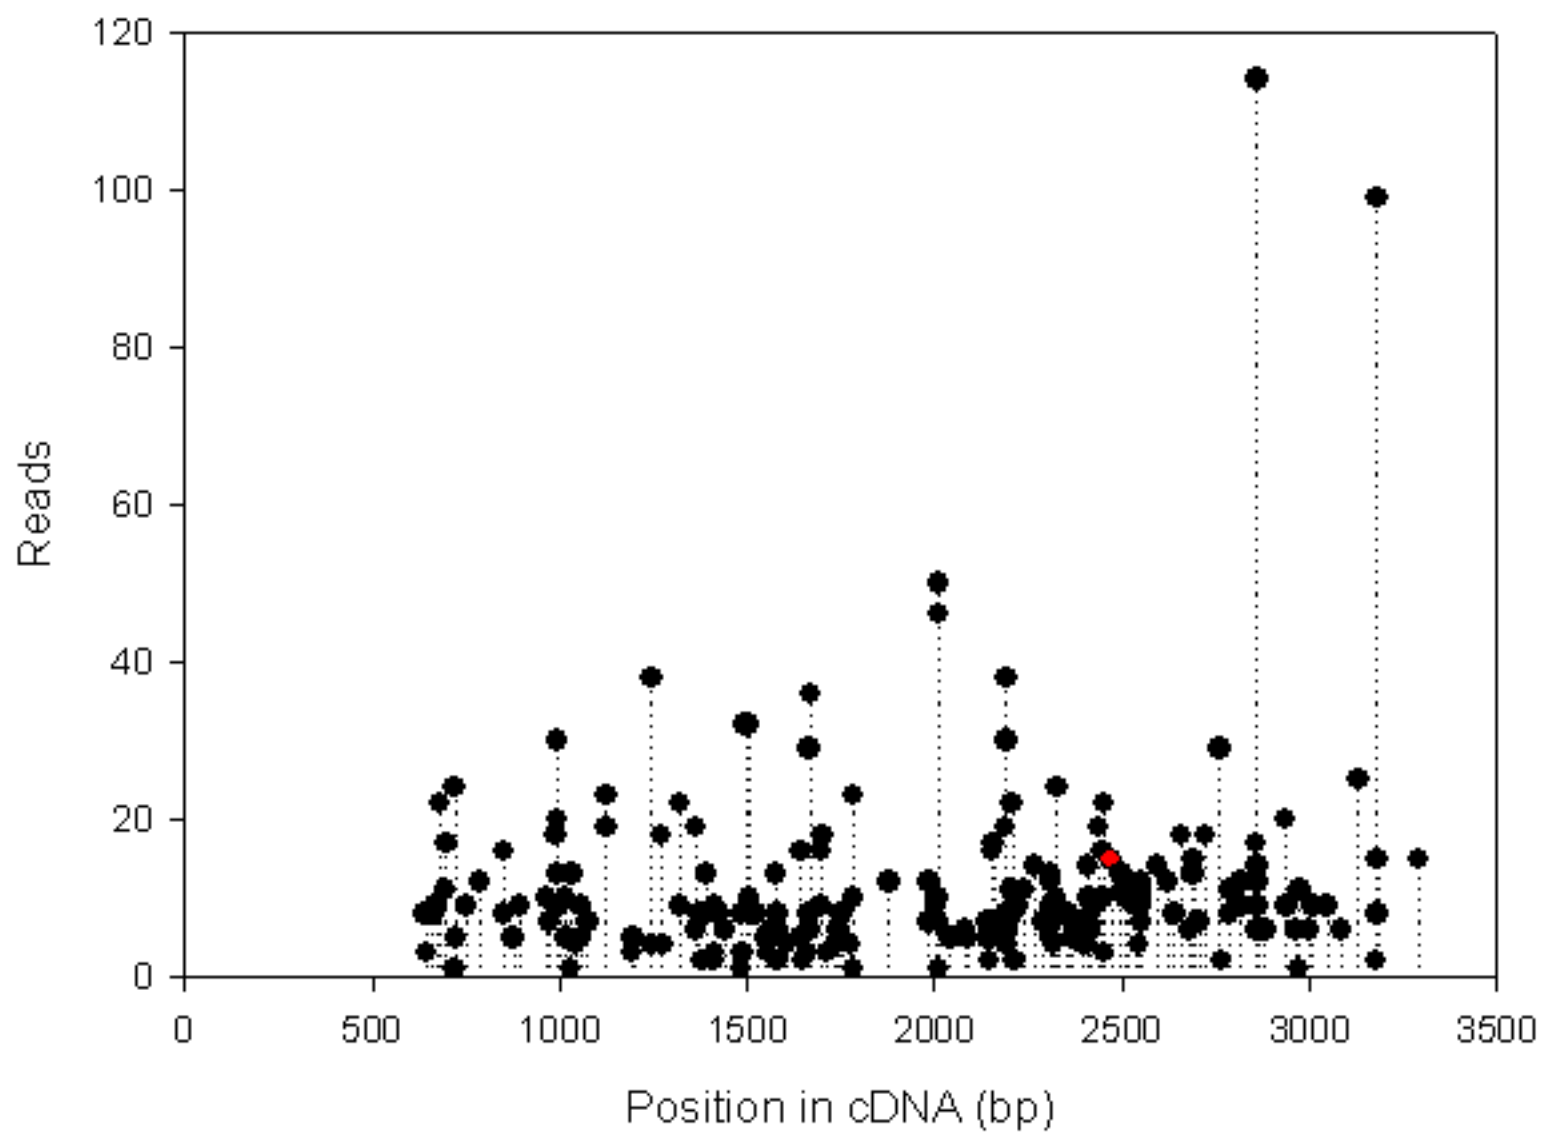

```

5' GAGACAUUGGGACGGGAUGUUUGCUC 3'      Cs4g01970.1
   : : : : : : : : : : : : : : : :
3' -----UAAUCGGGUCCUACGAACGA- 5'      Csi-miRN24
  
```

Csi-miRN26, target=Cs9g18000.1 gene=Cs9g18000  
 Category=3  
 Score=5  
 Cleavage Site=3291

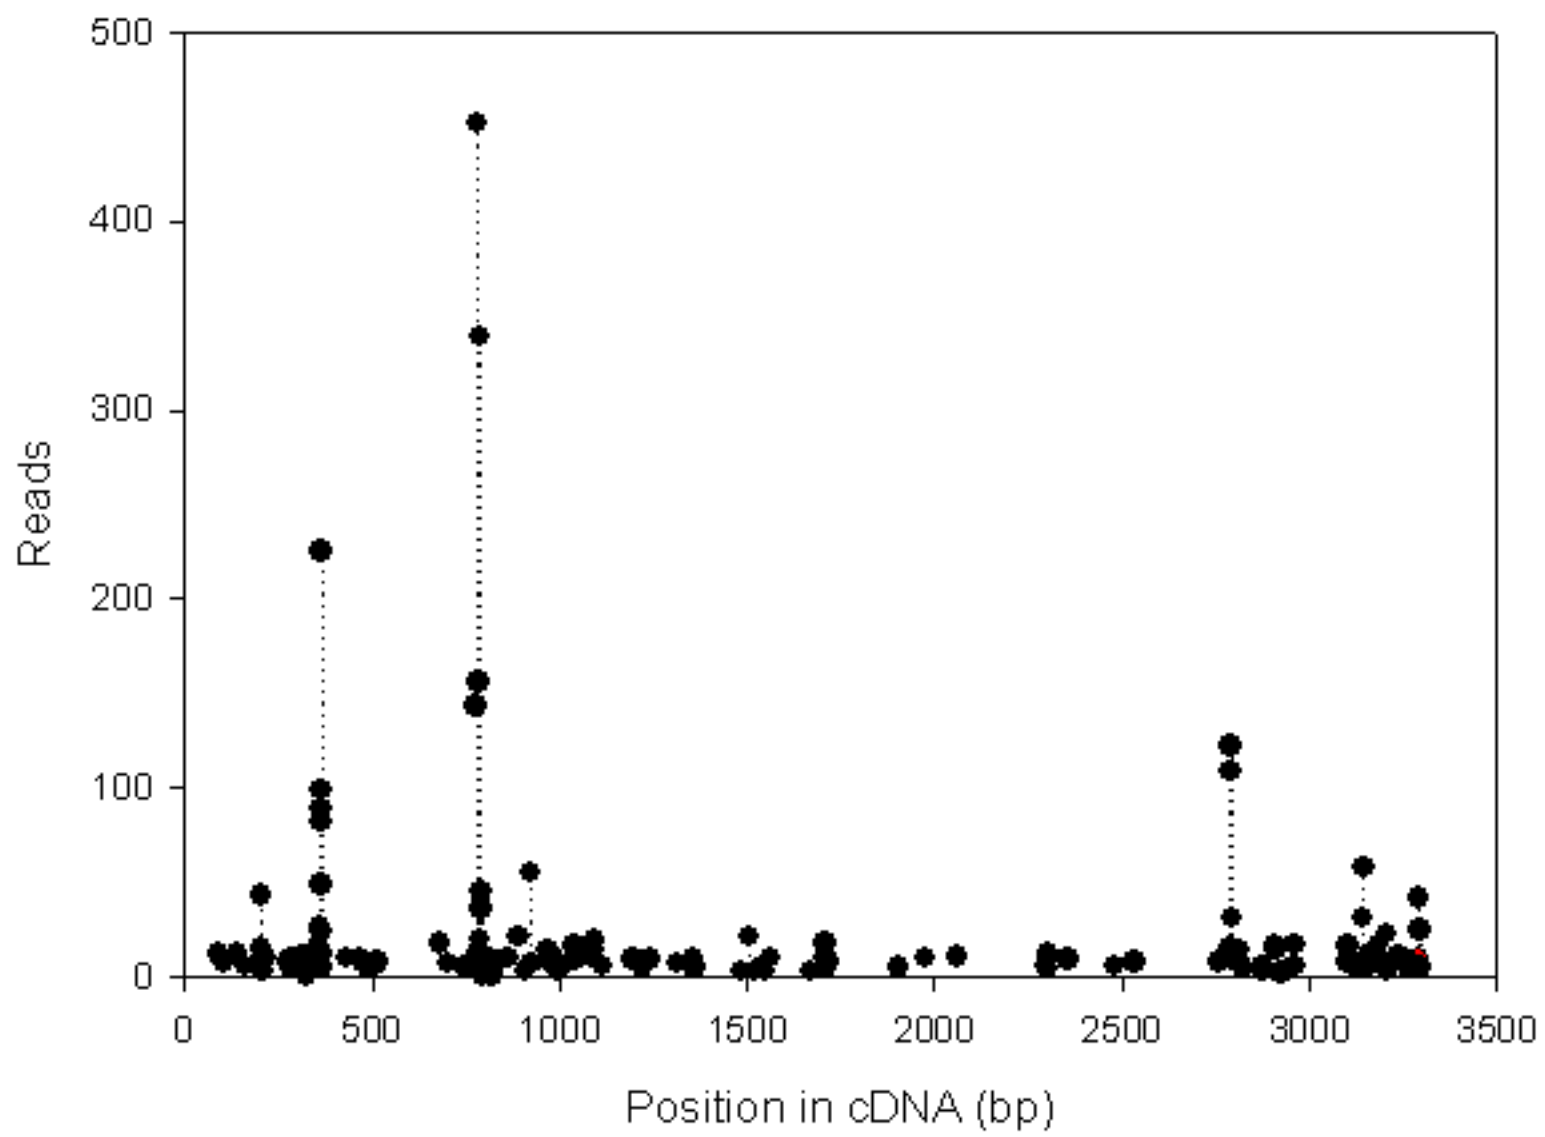

```

5' GUUCA-ACUUGUUCUGCCUCCUGUAAA 3'      Cs9g18000.1
   : : : : : : : : : : : : : : : : :
3' AAAGUAUAAACAAGGUGGAGGACA--- 5'      Csi-miRN26
  
```

Csi-miRN28, target=Cs3g17940.1 gene=Cs3g17940

Category=3

Score=5

Cleavage Site=610

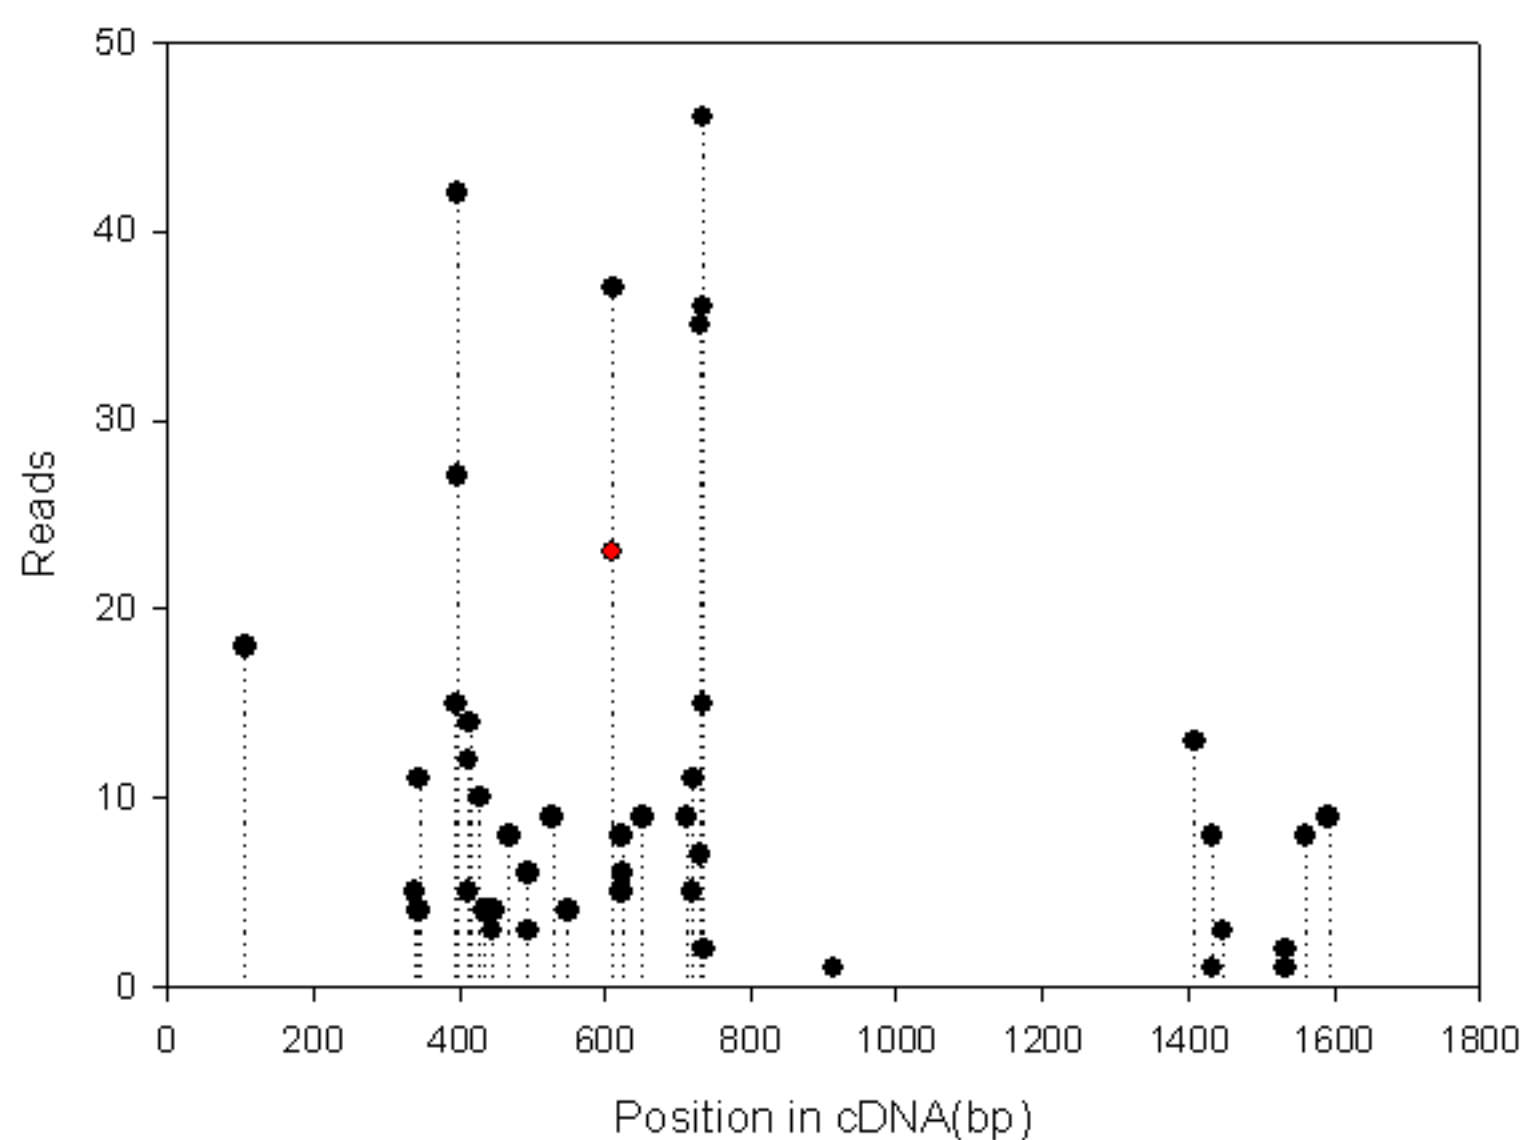

5' ACUGGAAGGCUACUCCCCAUAACUCU 3'

Cs3g17940.1

.....

3' UGGCGCGUCGAUGAGGGGUAC----- 5'

Csi-miRN28

Csi-miRN33, target=Cs4g07210.1 gene=Cs4g07210  
 Category=3  
 Score=5  
 Cleavage Site=1803

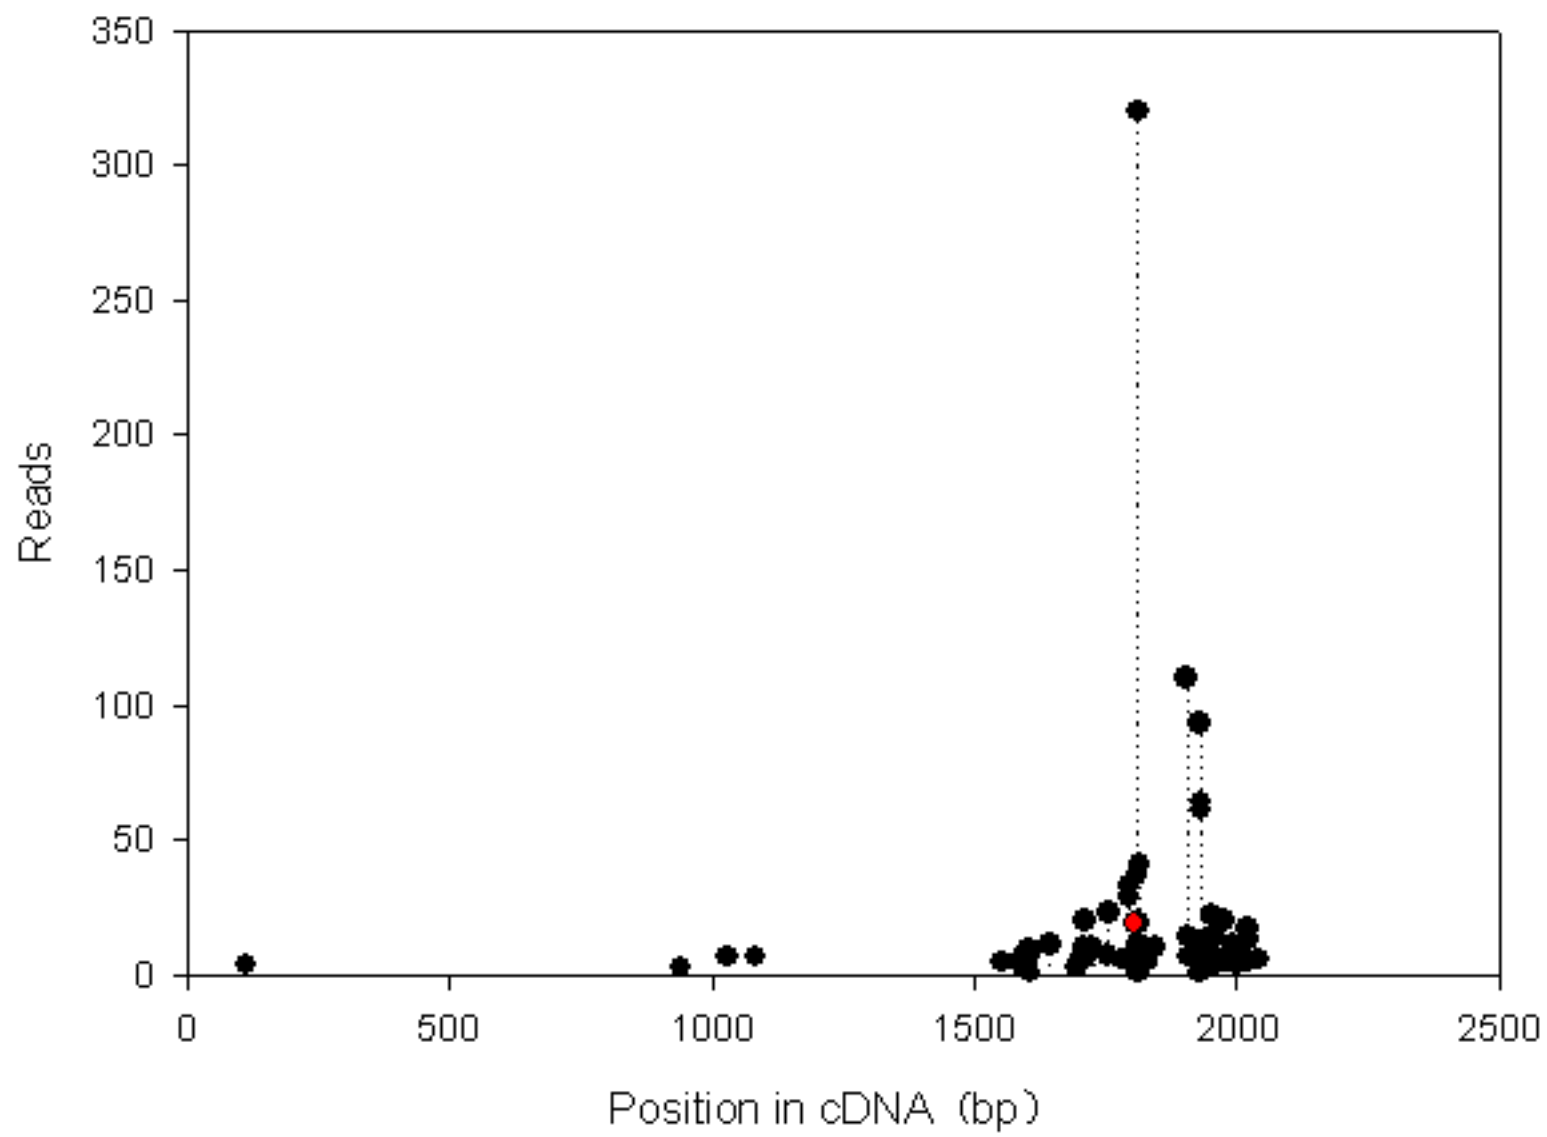

```

5' UUGGUCAUUUAGCUUGUUACAACACU 3'      Cs4g07210.1
   : : : : : : : : : : : : : : : : :
3' AACCGAAAAUCGAACAGGGA----- 5'      Csi-miRN33
  
```





T-plots for targets of all  
miRNAs in fruit

Csi-miR1092.2, target=Cs8g11330.1 gene=Cs8g11330  
 Category:3  
 Score=5  
 Cleavage Site=1168

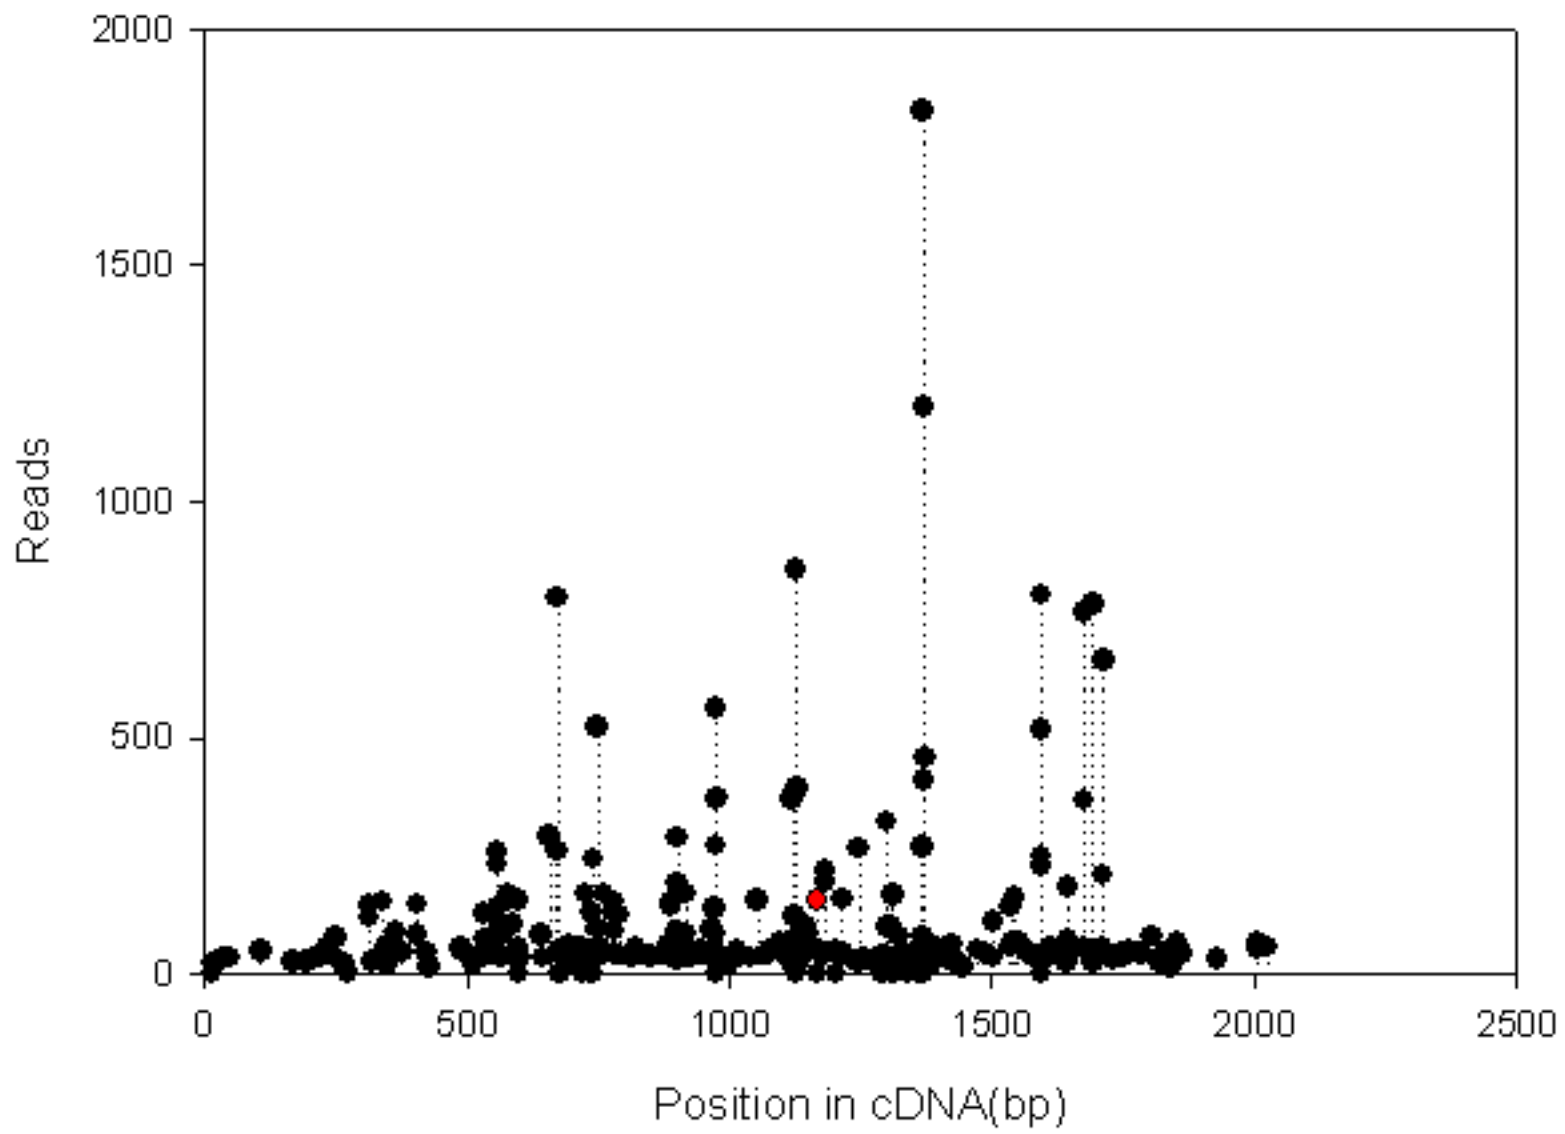

```

5' GGAAAUGUAUGCCAUUGGUGGAAGUG 3'      Cs8g11330.1
   :::::  ::  :  :::::
3' CCUUUACUUAC-GAAACCACCU--- 5'      Csi-miR1092.2

```

Csi-miR1446, target=Cs2g01340.1 gene=Cs2g01340

Category:3

Score=5

Cleavage Site=353

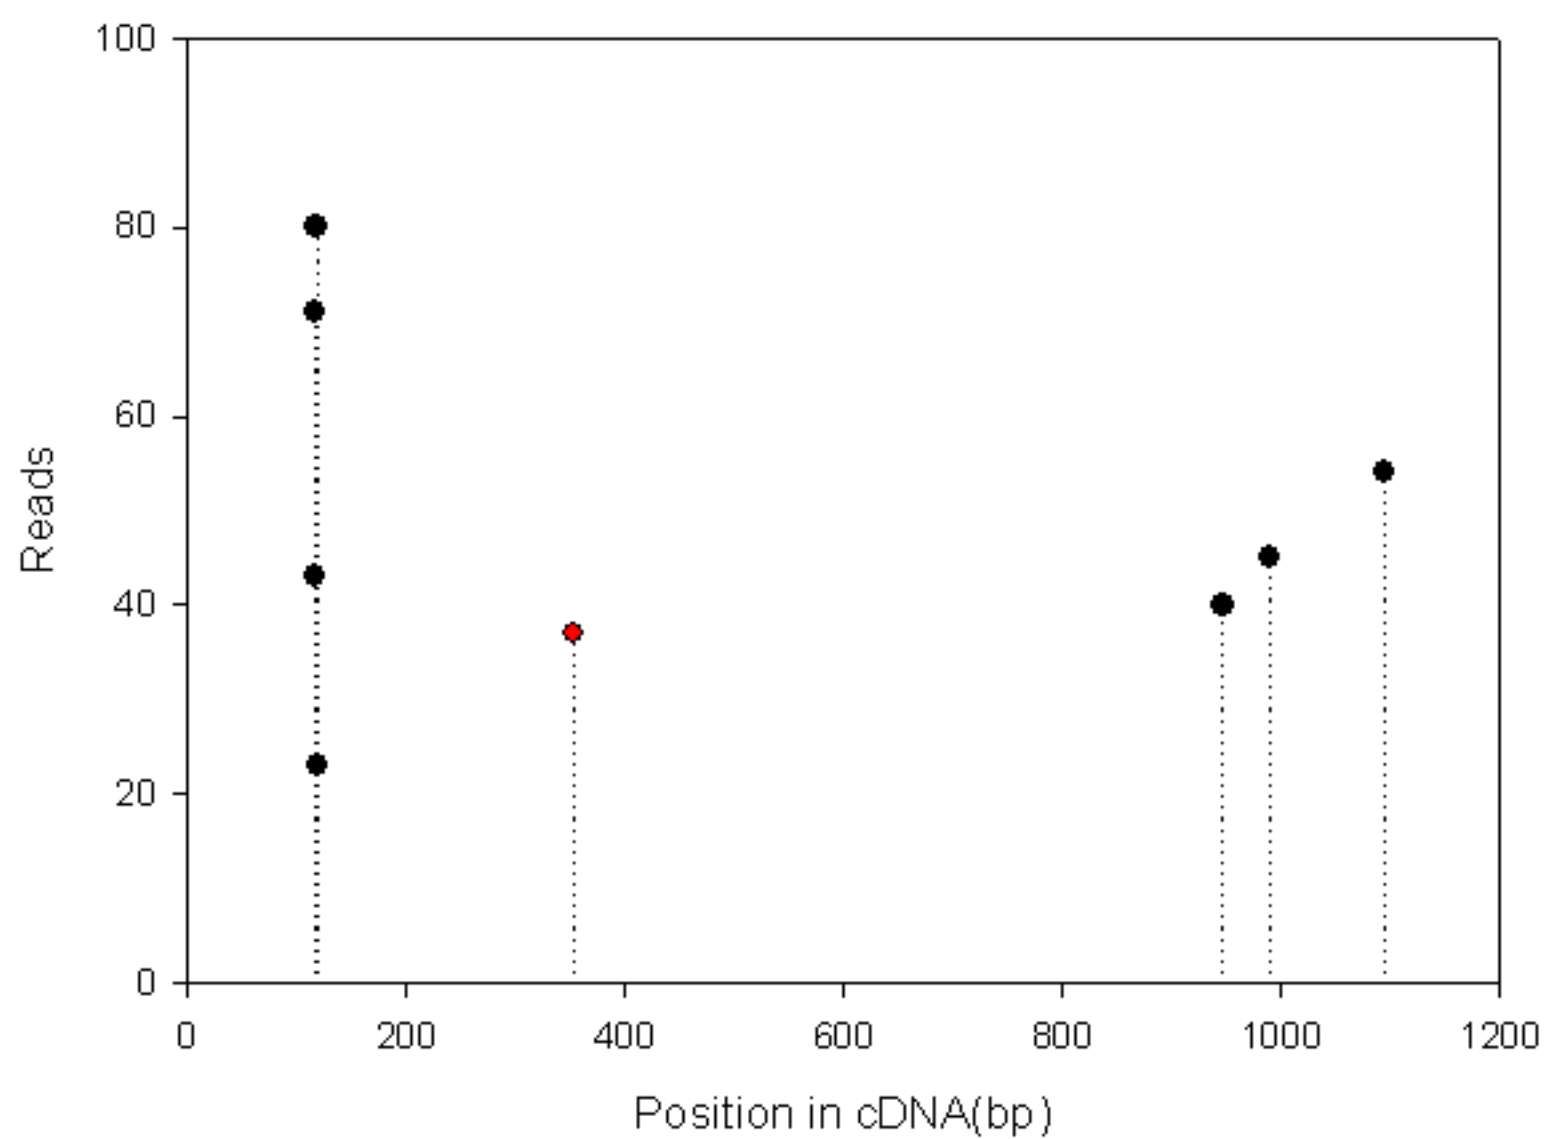

5' UUUGUUUAGCGAGAGAGUUCGGAUUU 3'

Cs2g01340.1

..... :: ::::: :::::

3' CGGCAACUCCUCUCUCAAGC----- 5'

Csi-miR1446

Csi-miR156a.1, target=Cs2g23550.1 gene=Cs2g23550  
 Category:1  
 Score=3  
 Cleavage Site=934

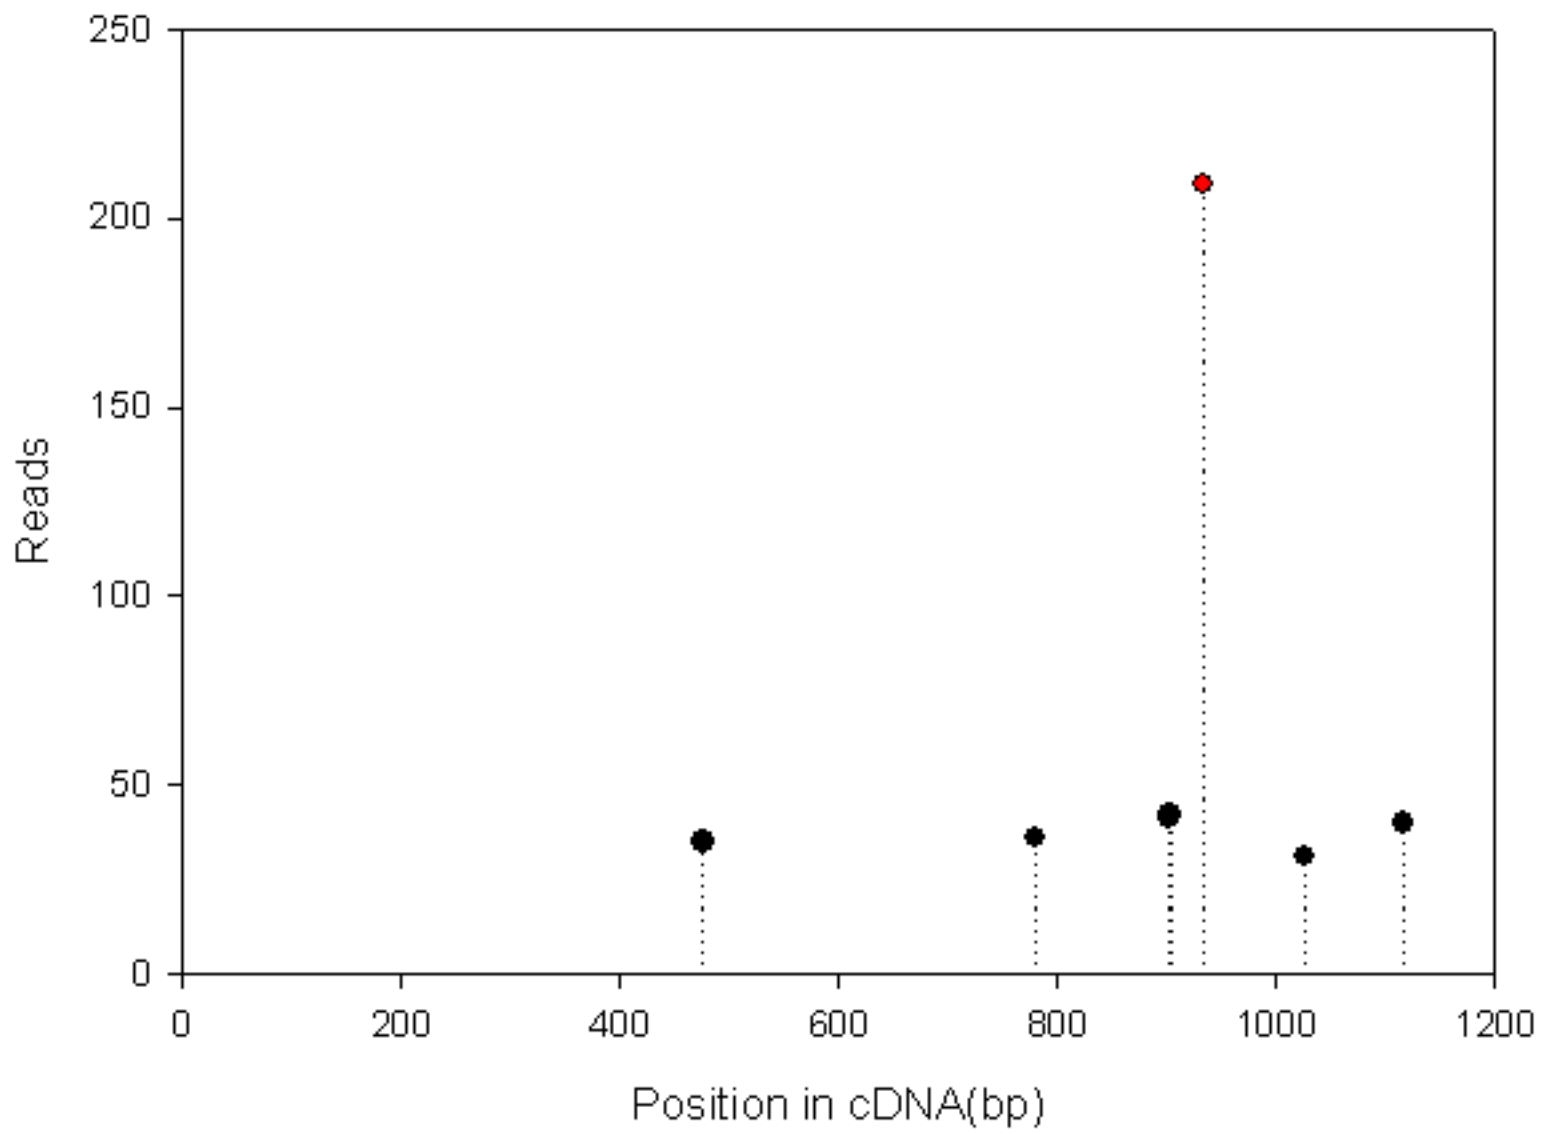

5' CAUGCUCUCUCUCUUCUGUCAUCCUA 3'  
 ::::: :::::::::::::::  
 3' -CACGAGUGAGAGAAGACAGUU---- 5'

Cs2g23550.1

Csi-miR156a.1

Csi-miR156a.1, target=Cs3g10870.1 gene=Cs3g10870  
 Category:1  
 Score=3.5  
 Cleavage Site=244

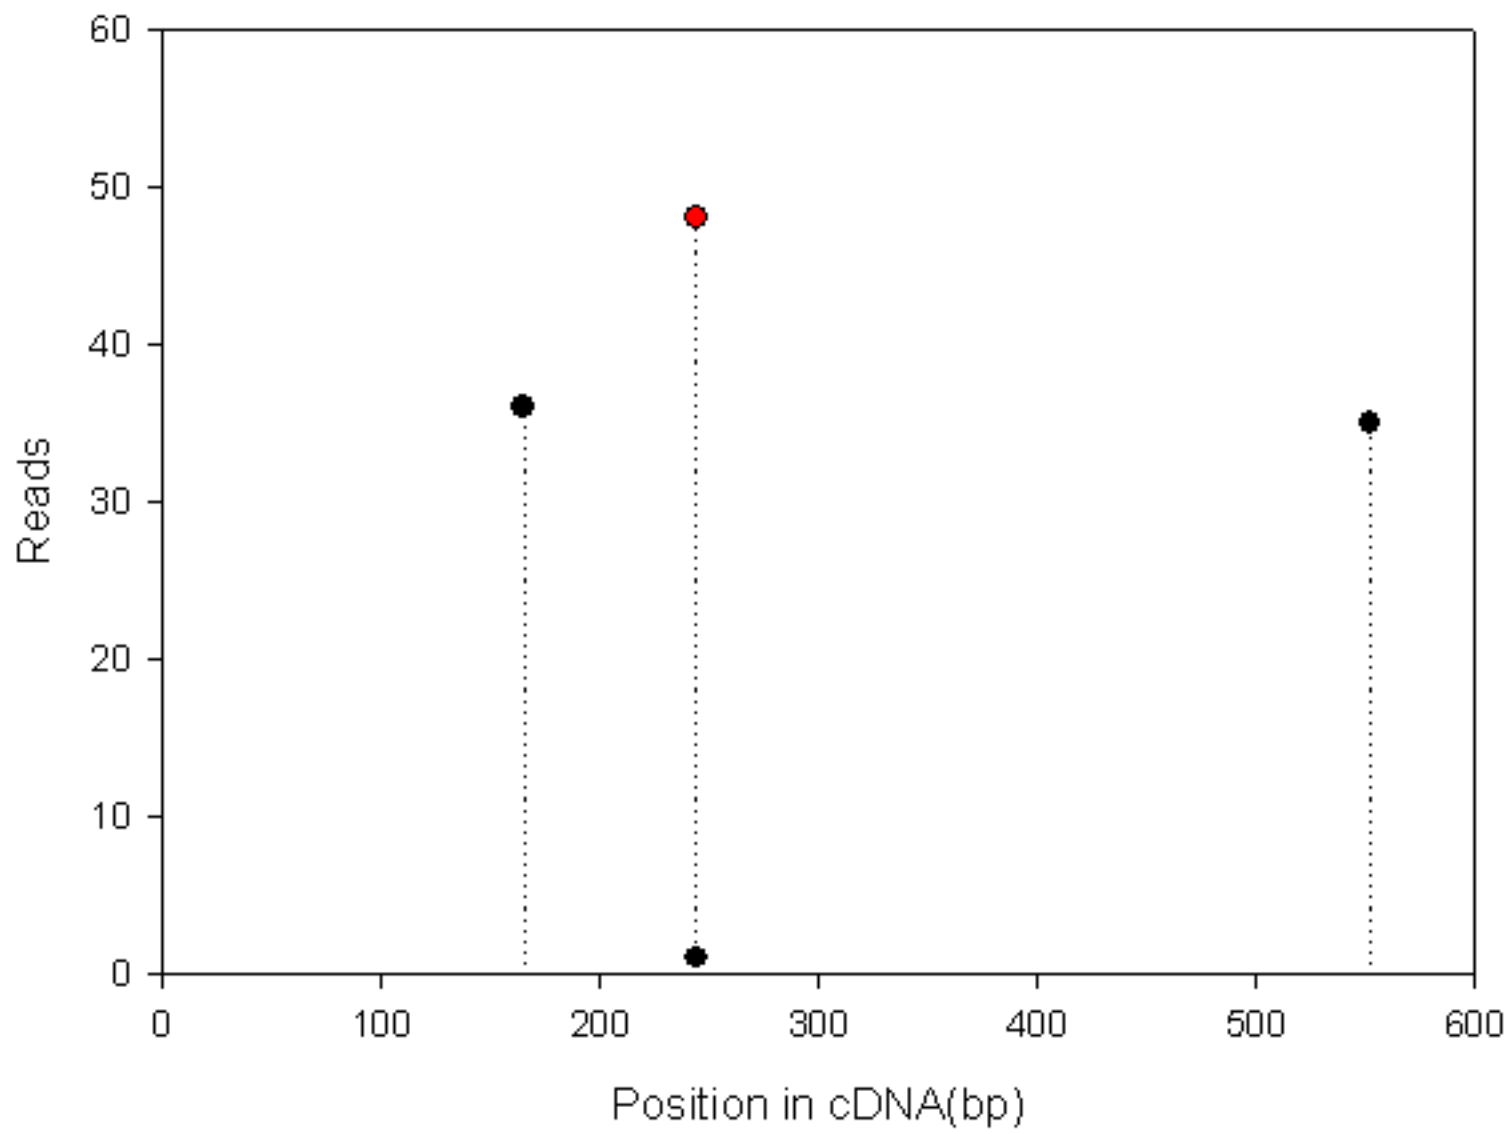

```

5' CUUCGUCCUC-UUCUUUUCUGUCAACA 3'      Cs3g10870.1
   :: ::: .:::::
3' ----CACGAGUGAGAGAAGACAGUU-- 5'      Csi-miR156a.1
  
```

Csi-miR156a.1, target=Cs5g12260.1 gene=Cs5g12260  
Category:1  
Score=4  
Cleavage Site=1693

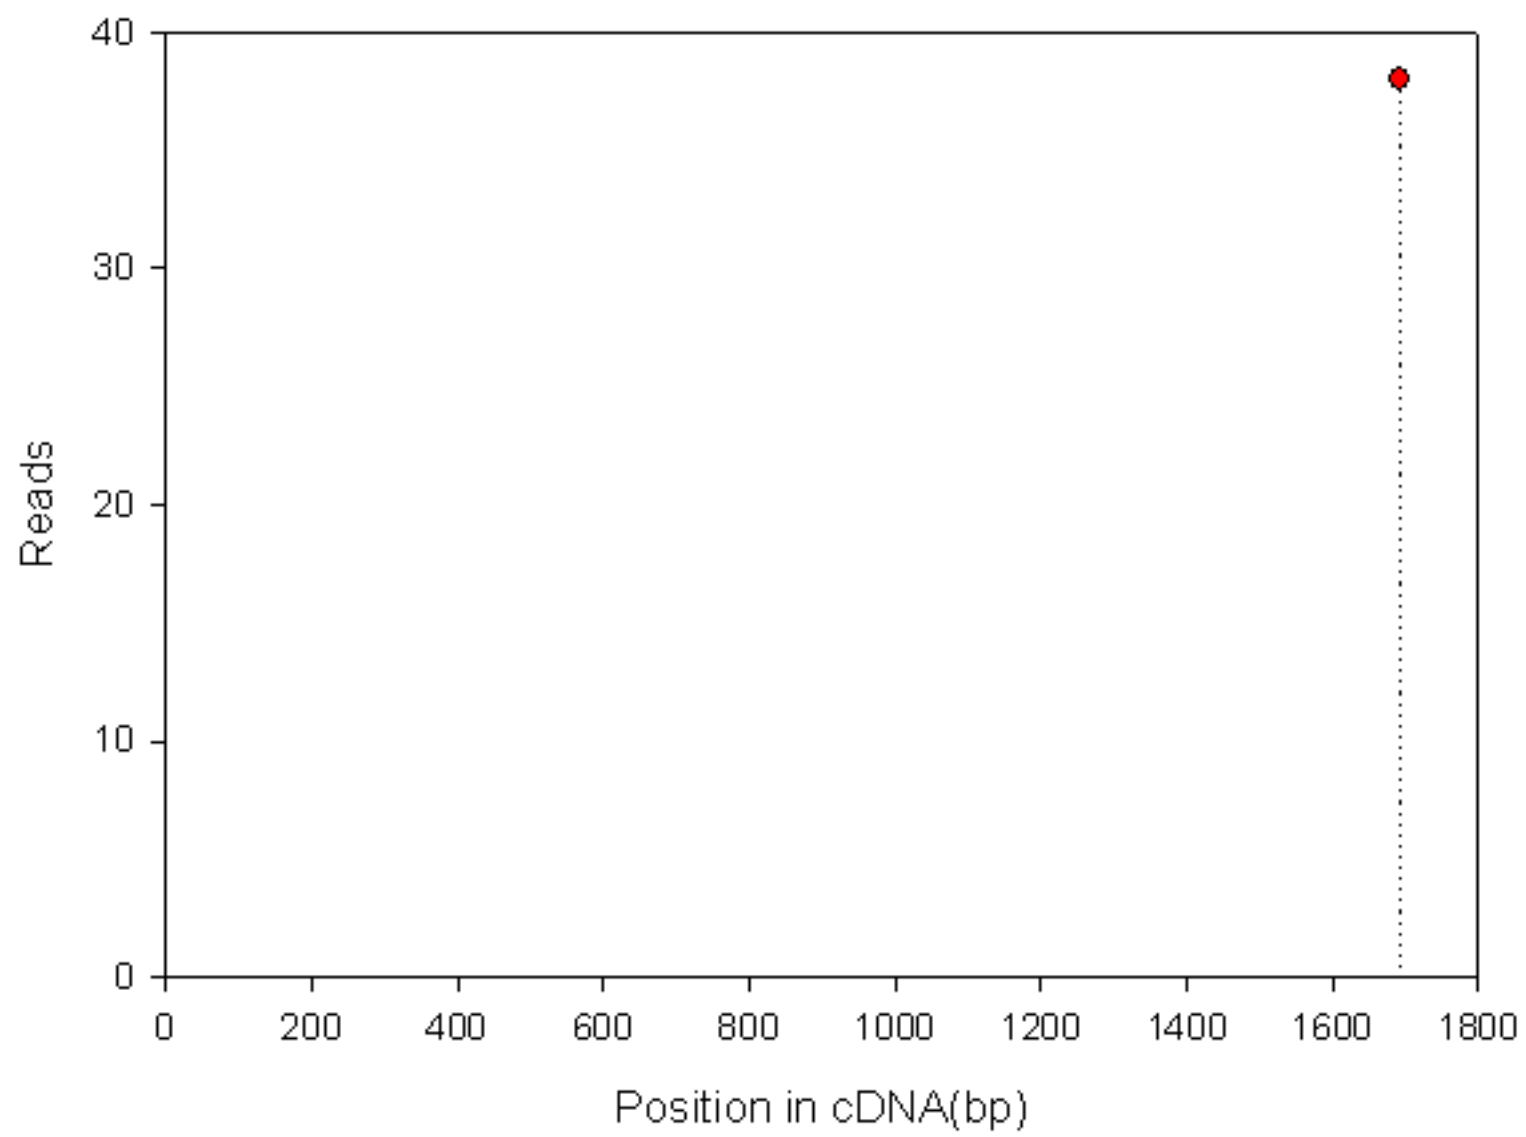

```
5' CUAUGCUCACCCUCUUCUGUCAUCUA 3' Cs5g12260.1
   :::::::::: ::::::::::::::::::::
3' --CACGAGUGAGAGAAGACAGUU--- 5' Csi-miR156a.1
```

Csi-miR156a.1, target=Cs7g11770.1 gene=Cs7g11770  
 Category:1  
 Score=1.5  
 Cleavage Site=1487

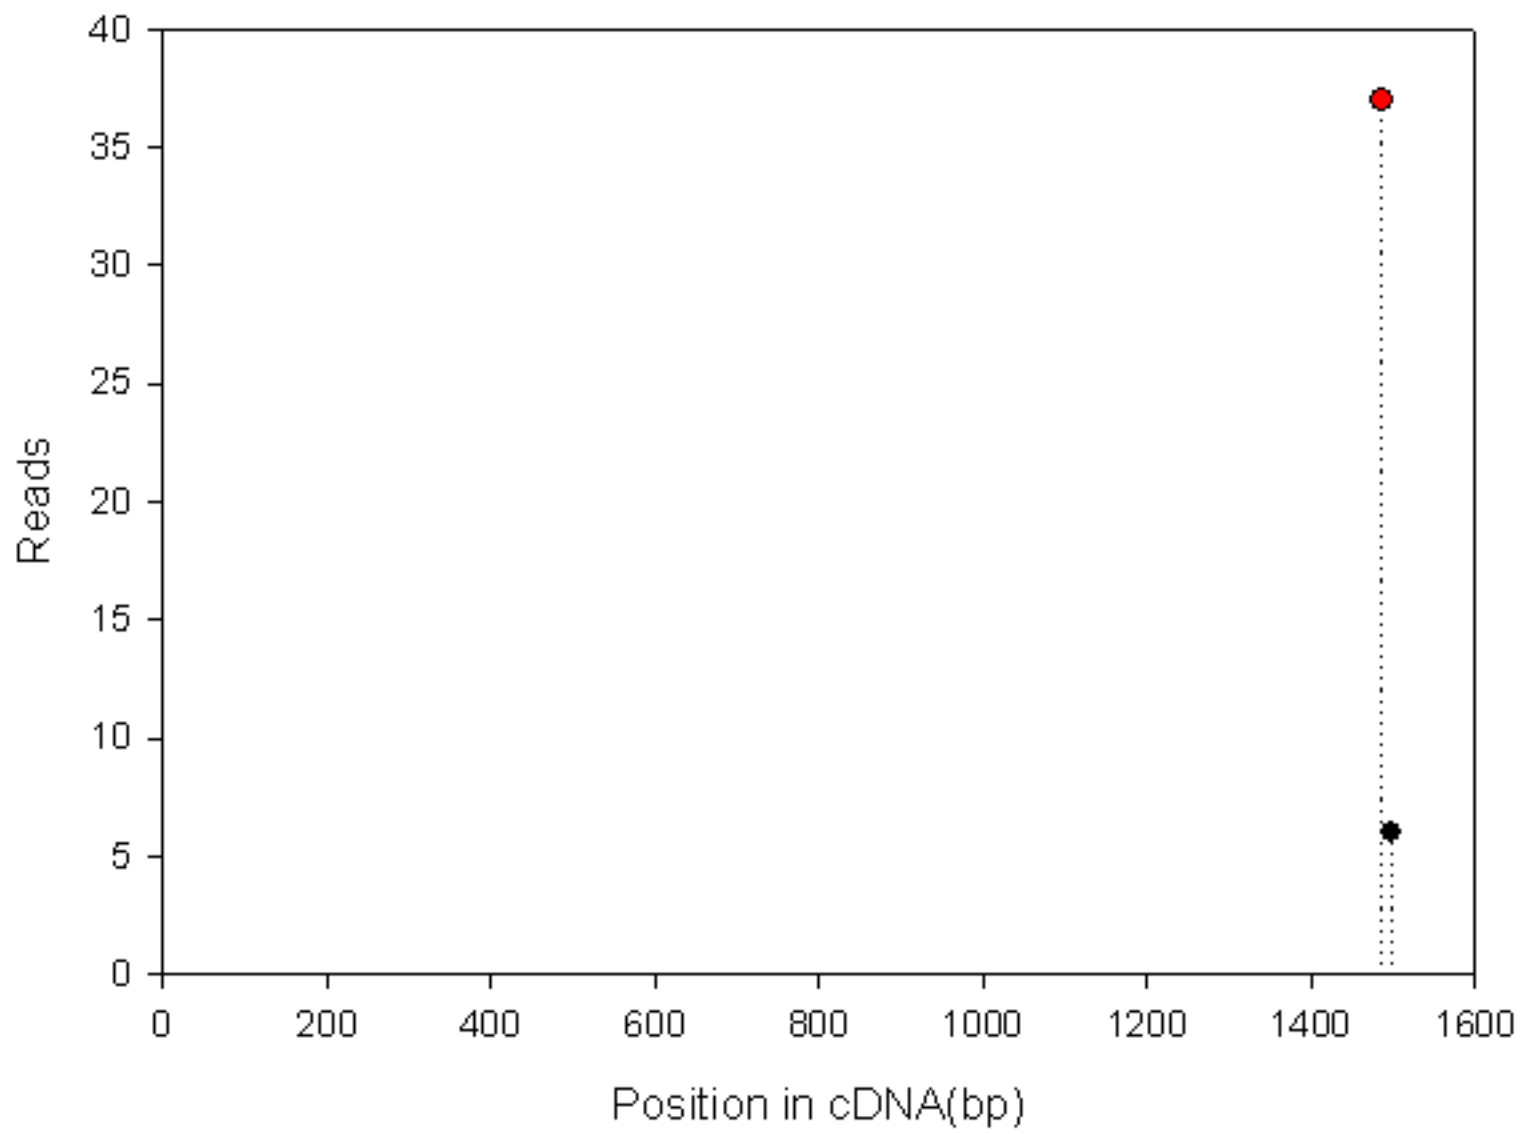

```

5' UGGUGCUCUCUCUCUUCUGUCAGCUC 3'      Cs7g11770.1
   ::::: ::::::::::::::::::::.
3' --CACGAGUGAGAGAAGACAGUU--- 5'      Csi-miR156a.1
  
```



Csi-miR156a.1, target=Orange1.1t01983.1 gene=Orange1.1t01983  
 Category:3  
 Score=5  
 Cleavage Site=693

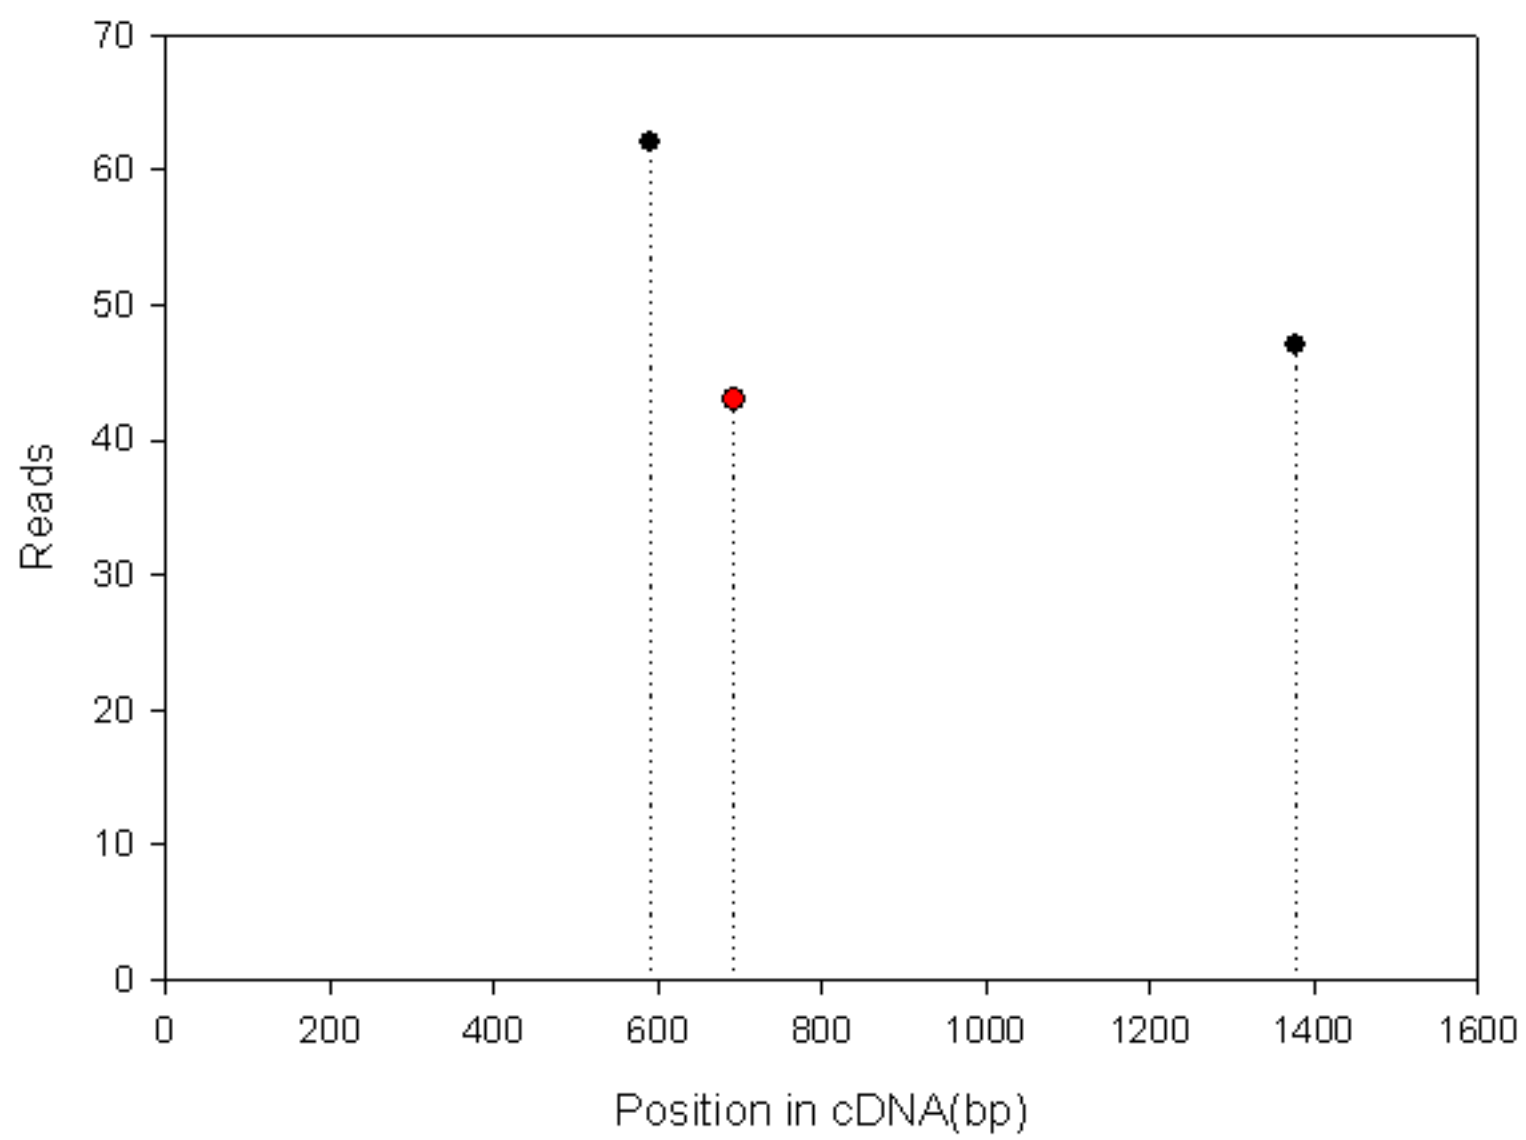

```

5' CUUGCUUCUGUCUCUUCUGUCAUCAC 3'      Orange1.1t01983.1
   : : : : . . : : : : : : : : : :
3' -CACGAGUG-AGAGAAGACAGUU--- 5'      Csi-miR156a.1
  
```

Csi-miR156a.2, target=Cs2g17270.1 gene=Cs2g17270  
 Category:3  
 Score=4.5  
 Cleavage Site=274

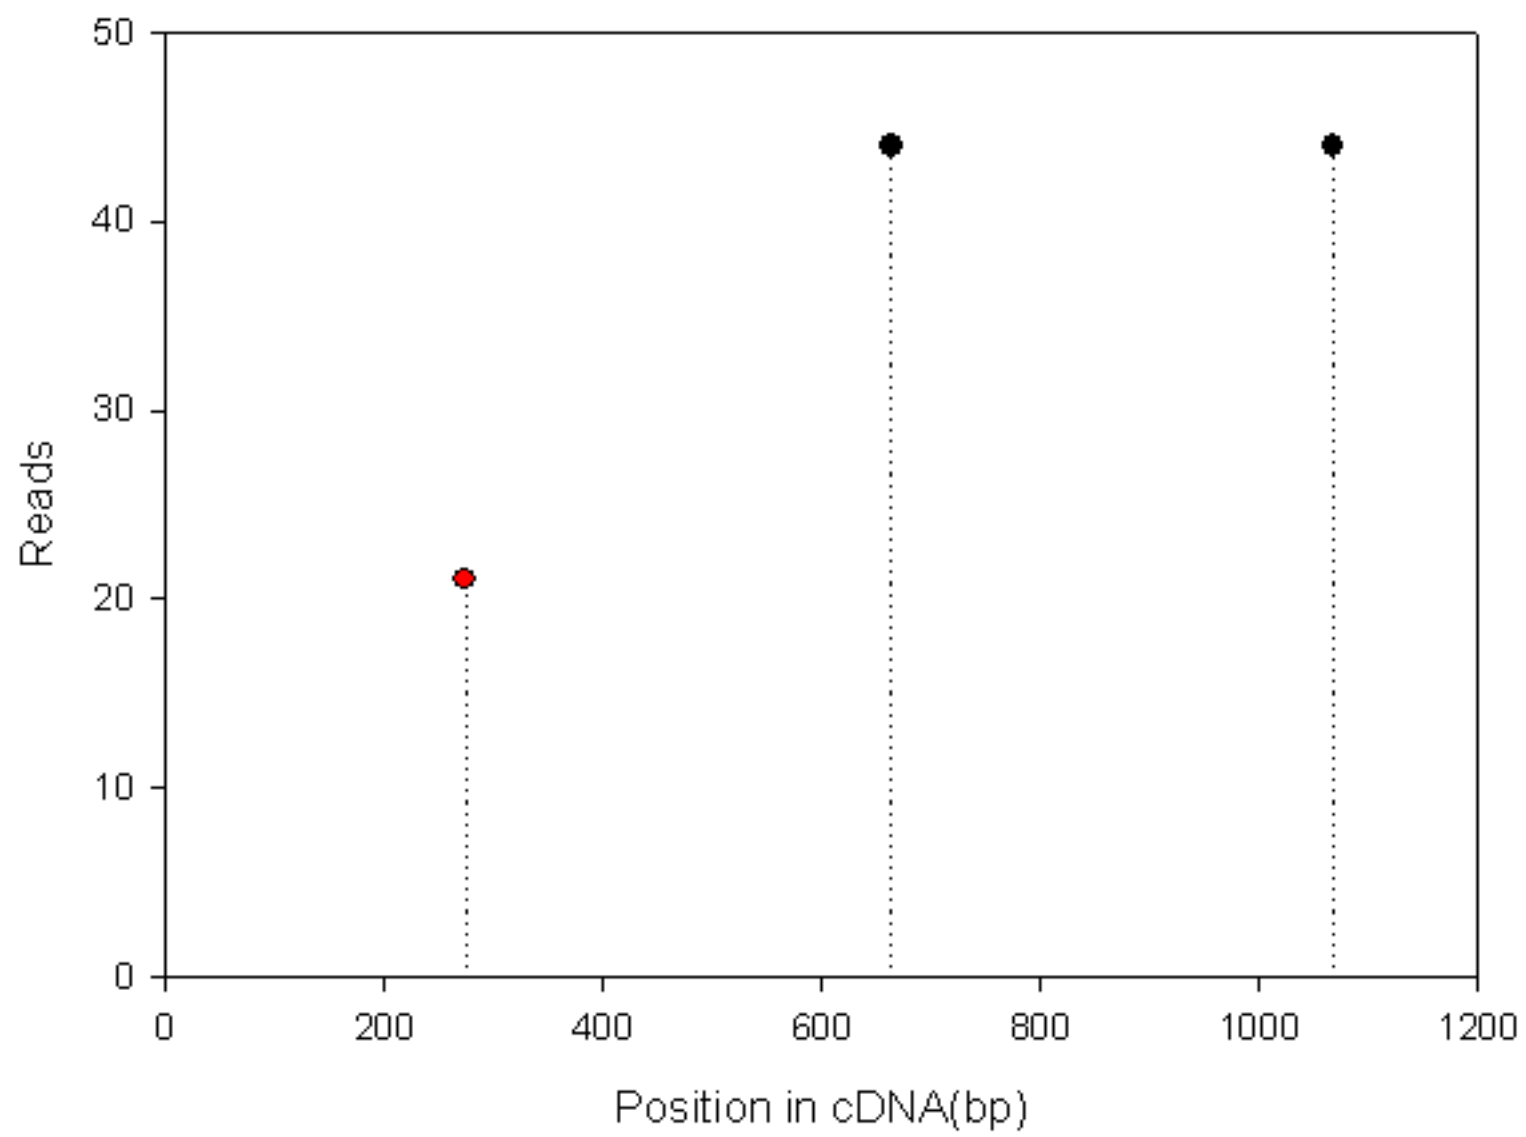

```

5' CUCUCUGCACGCU-UCUUCUGUCAUGG 3'      Cs2g17270.1
   ::: :.:: ::::~::~:
3' ----CACGAGUGAGAGAAGACAGU---- 5'      Csi-miR156a.2
  
```

Csi-miR156a.2, target=Cs2g23550.1 gene=Cs2g23550  
 Category:1  
 Score=2  
 Cleavage Site=934



5' CAUGCUCUCUCUCUUCUGUCAUCCUA 3'  
 ::::: :::::::::::::::  
 3' -CACGAGUGAGAGAAGACAGU----- 5'

Cs2g23550.1

Csi-miR156a.2

Csi-miR156a.2, target=Cs3g10870.1 gene=Cs3g10870  
 Category:1  
 Score=4  
 Cleavage Site=244



5' CUUCGUCCUC-UUCUUUUCUGUCAACA 3'

Cs3g10870.1

  :: ::: .::::: ::::: :::::

3' ----CACGAGUGAGAGAAGACAGU---- 5'

Csi-miR156a.2

Csi-miR156a.2, target=Cs5g12260.1 gene=Cs5g12260  
Category:1  
Score=3  
Cleavage Site=1693



```
5' CUAUGCUCACCCUCUUCUGUCAUCUA 3'      Cs5g12260.1
   :::::  ::::::::::::::
3' --CACGAGUGAGAGAAGACAGU---- 5'      Csi-miR156a.2
```

Csi-miR156a.2, target=Cs7g11770.1 gene=Cs7g11770  
 Category:1  
 Score=1  
 Cleavage Site=1487

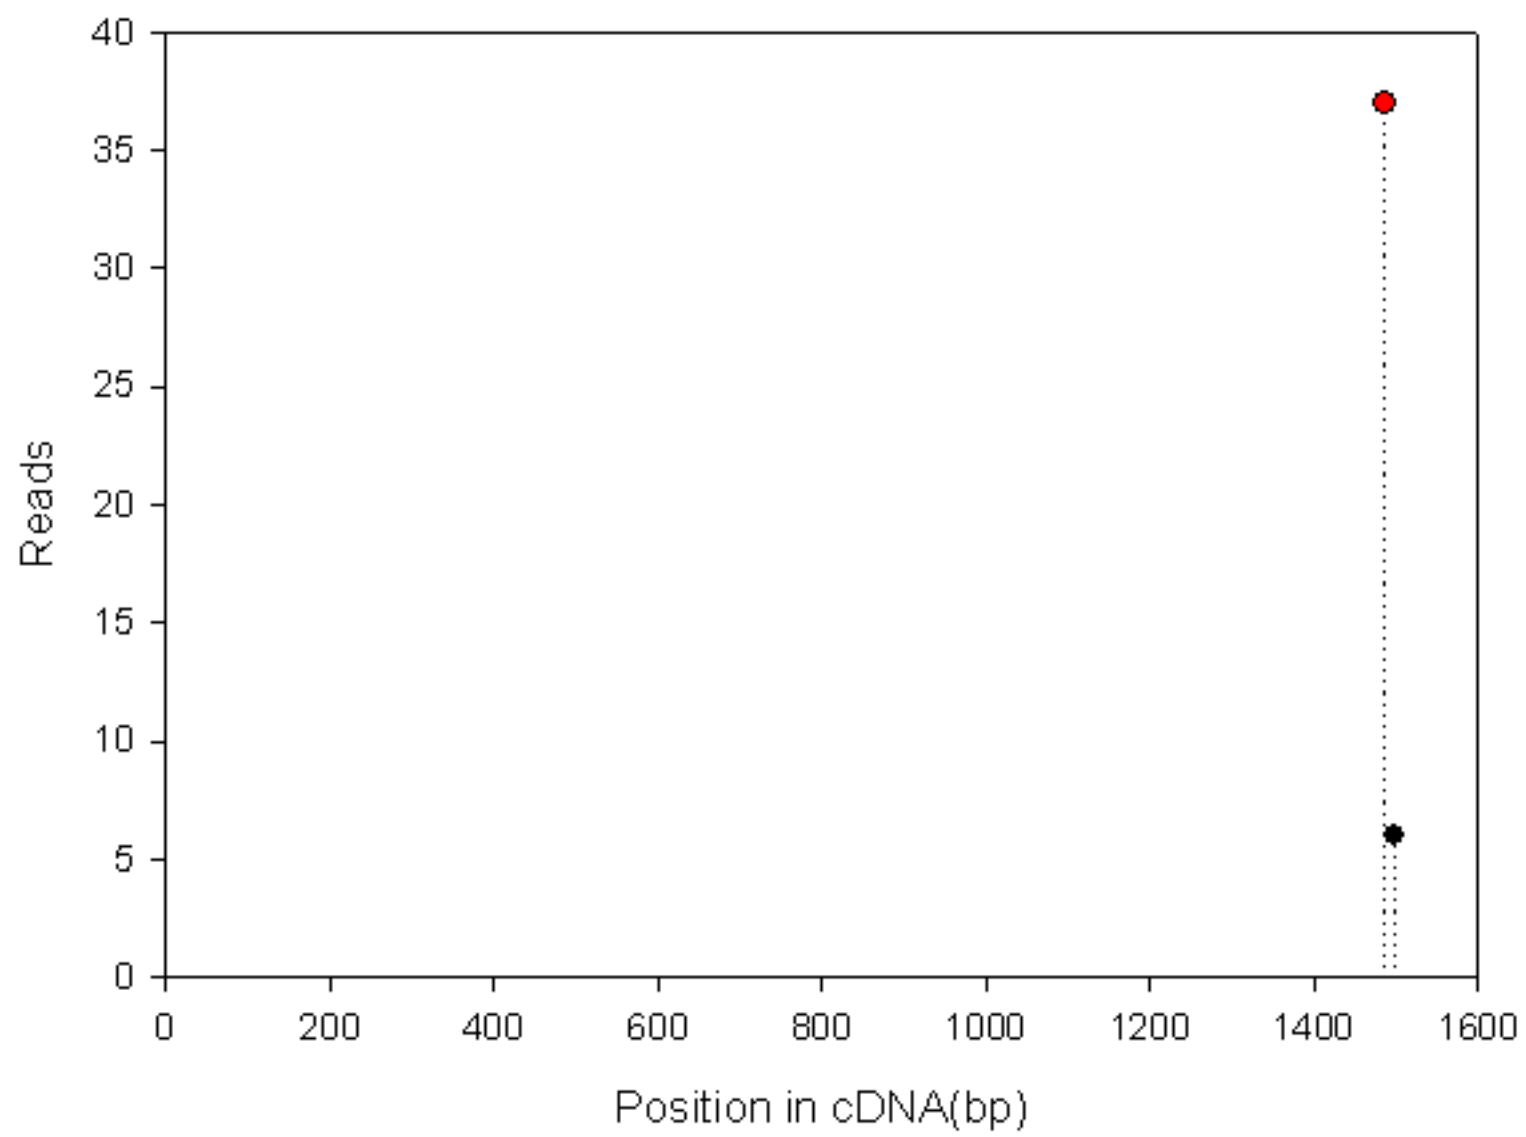

```

5' UGGUGCUCUCUCUCUUCUGUCAGCUC 3'      Cs7g11770.1
   : : : : : : : : : : : : : : : :
3' --CACGAGUGAGAGAAGACAGU----- 5'    Csi-miR156a.2
  
```

Csi-miR156a.2, target=Orange1.1t01983.1 gene=Orange1.1t01983  
 Category:3  
 Score=5  
 Cleavage Site=693

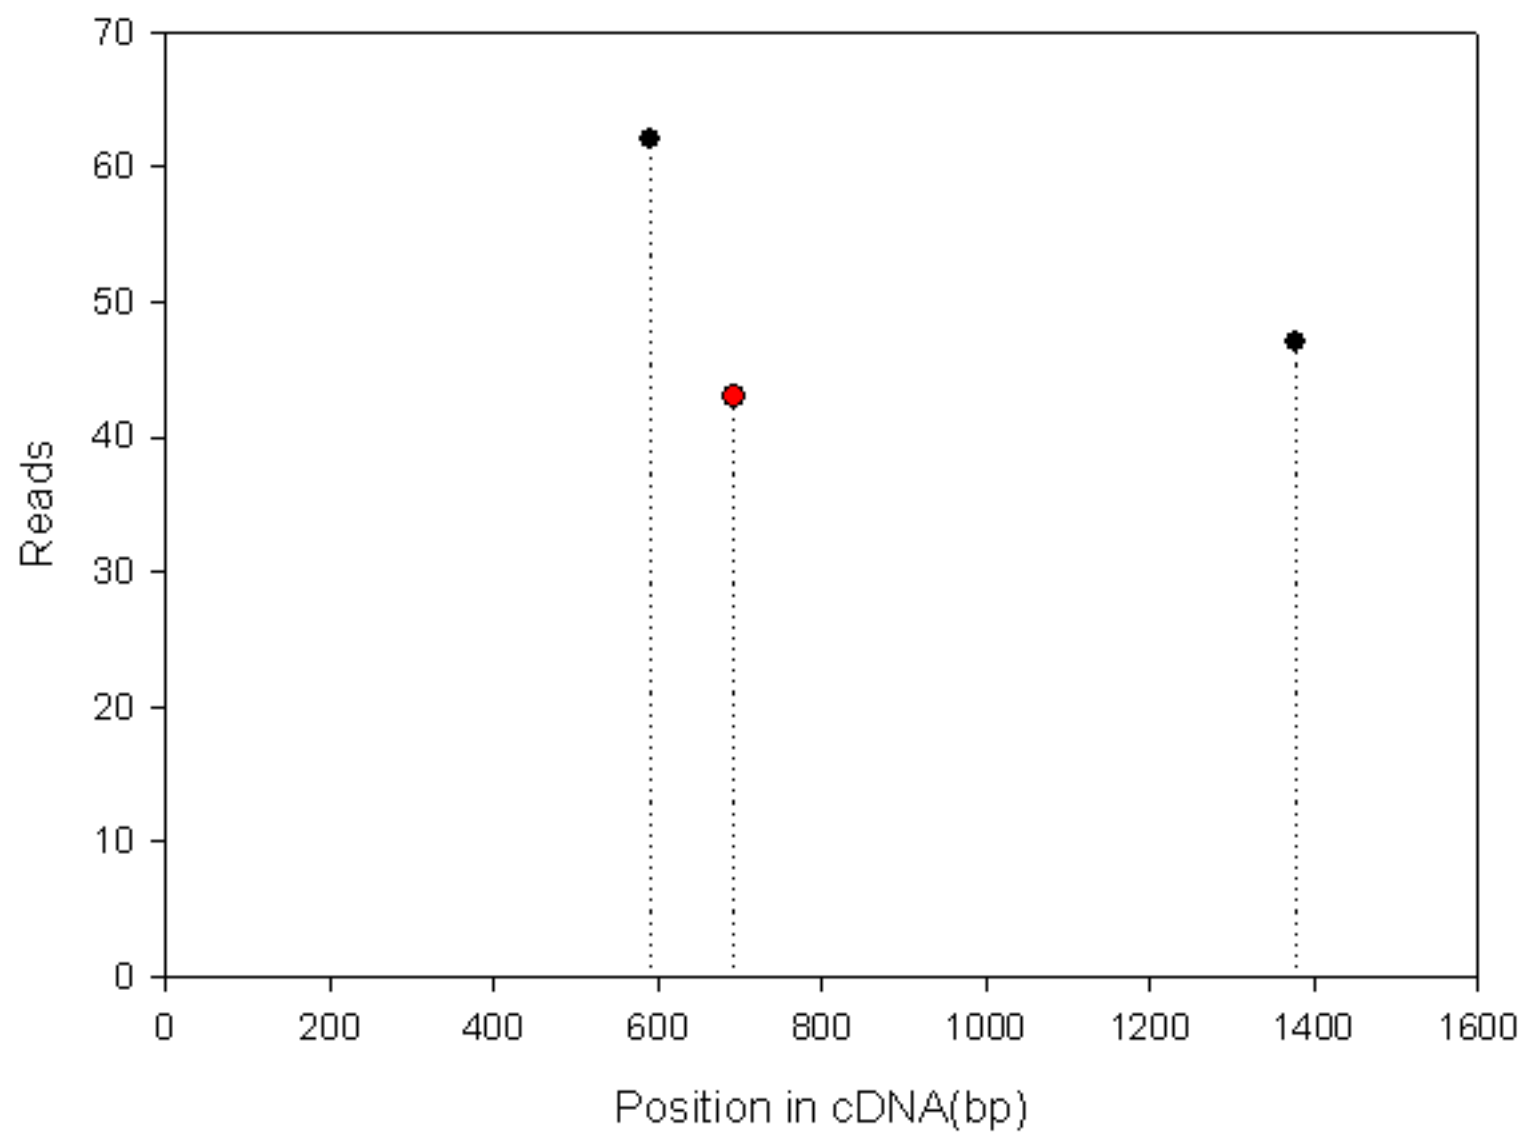

5' CUUGCUUCUGUCUCUUCUGUCAUCAC 3'  
 :::: . ::::::::::::::  
 3' -CACGAGUG-AGAGAAGACAGU---- 5'

Orange1.1t01983.1  
 Csi-miR156a.2

Csi-miR156b.1, target=Cs2g23550.1 gene=Cs2g23550  
 Category:1  
 Score=3  
 Cleavage Site=934

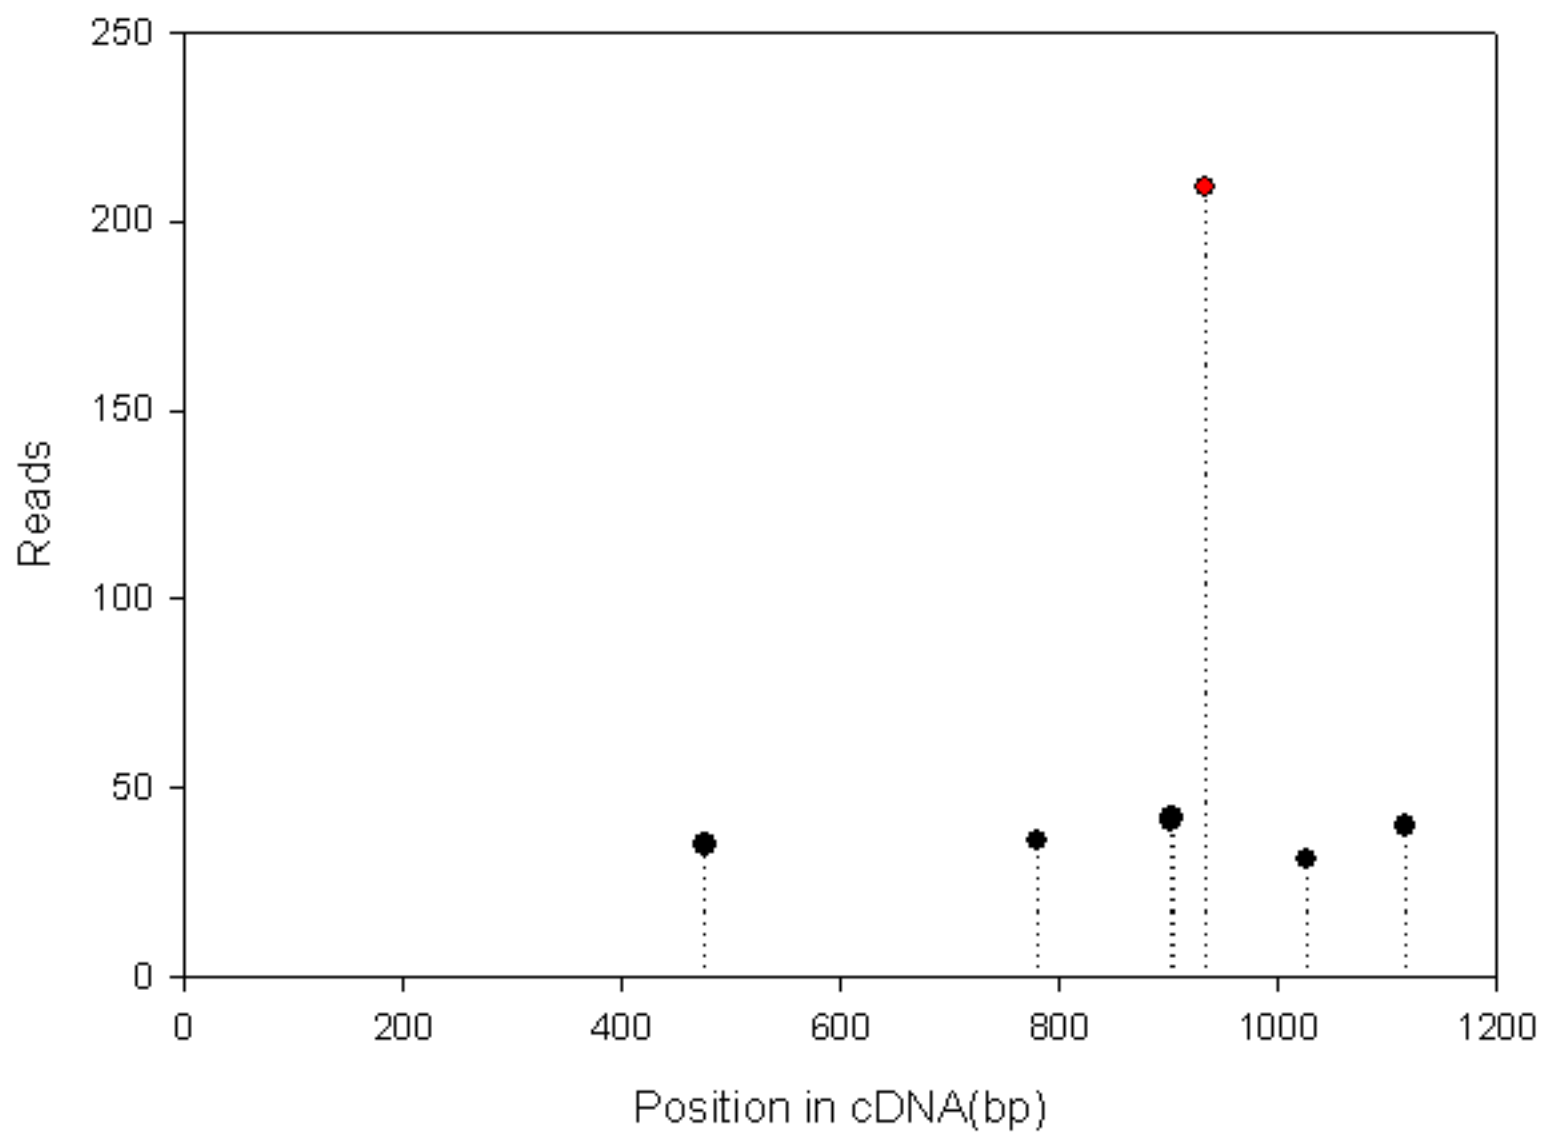

5' CAUGCUCUCUCUCUUCUGUCAUCCUA 3'  
 ::::: :::::::::::::::  
 3' -CACGAGUGAGAGAAGACAGUC---- 5'

Cs2g23550.1  
 Csi-miR156b.1



Csi-miR156b.1, target=Cs3g10870.1 gene=Cs3g10870  
 Category:1  
 Score=4.5  
 Cleavage Site=244



```

5' CUUCGUCCUC-UUCUUUUCUGUCAACA 3'      Cs3g10870.1
   :: ::: .:::::
3' ----CACGAGUGAGAGAAGACAGUC-- 5'      Csi-miR156b.1
  
```

Csi-miR156b.1, target=Cs5g12260.1 gene=Cs5g12260  
 Category:1  
 Score=4  
 Cleavage Site=1693



```

5' CUAUGCUCACCCUCUUCUGUCAUCUA 3'      Cs5g12260.1
   :::::  ::::::::::::::
3' --CACGAGUGAGAGAAGACAGUC--- 5'      Csi-miR156b.1

```

Csi-miR156b.1, target=Cs7g11770.1 gene=Cs7g11770  
 Category:1  
 Score=1  
 Cleavage Site=1487



```

5' UGGUGCUCUCUCUCUCUUCUGUCAGCUC 3'      Cs7g11770.1
   ::::: ::::::::::::::::::::
3' --CACGAGUGAGAGAAGACAGUC--- 5'      Csi-miR156b.1
  
```

Csi-miR156b.1, target=Orange1.1t01983.1 gene=Orange1.1t01983  
 Category:3  
 Score=5  
 Cleavage Site=693



5' CUUGCUCUCUGUCUCUCUCUGUCAUCAC 3'  
 ::::. . :::::~::~:  
 3' -CACGAGUG-AGAGAAGACAGUC--- 5'

Orange1.1t01983.1

Csi-miR156b.1

Csi-miR156c.1, target=Cs2g17270.1 gene=Cs2g17270  
 Category:3  
 Score=4.5  
 Cleavage Site=274



```

5' CUCUCUGCACGCU-UCUUCUGUCAUGG 3'      Cs2g17270.1
   : ::: :.:: ::::~::~:
3' ---ACACGAGUGAGAGAAGACAGU--- 5'      Csi-miR156c.1
  
```

Csi-miR156c.1, target=Cs2g23550.1 gene=Cs2g23550  
 Category:1  
 Score=3  
 Cleavage Site=934

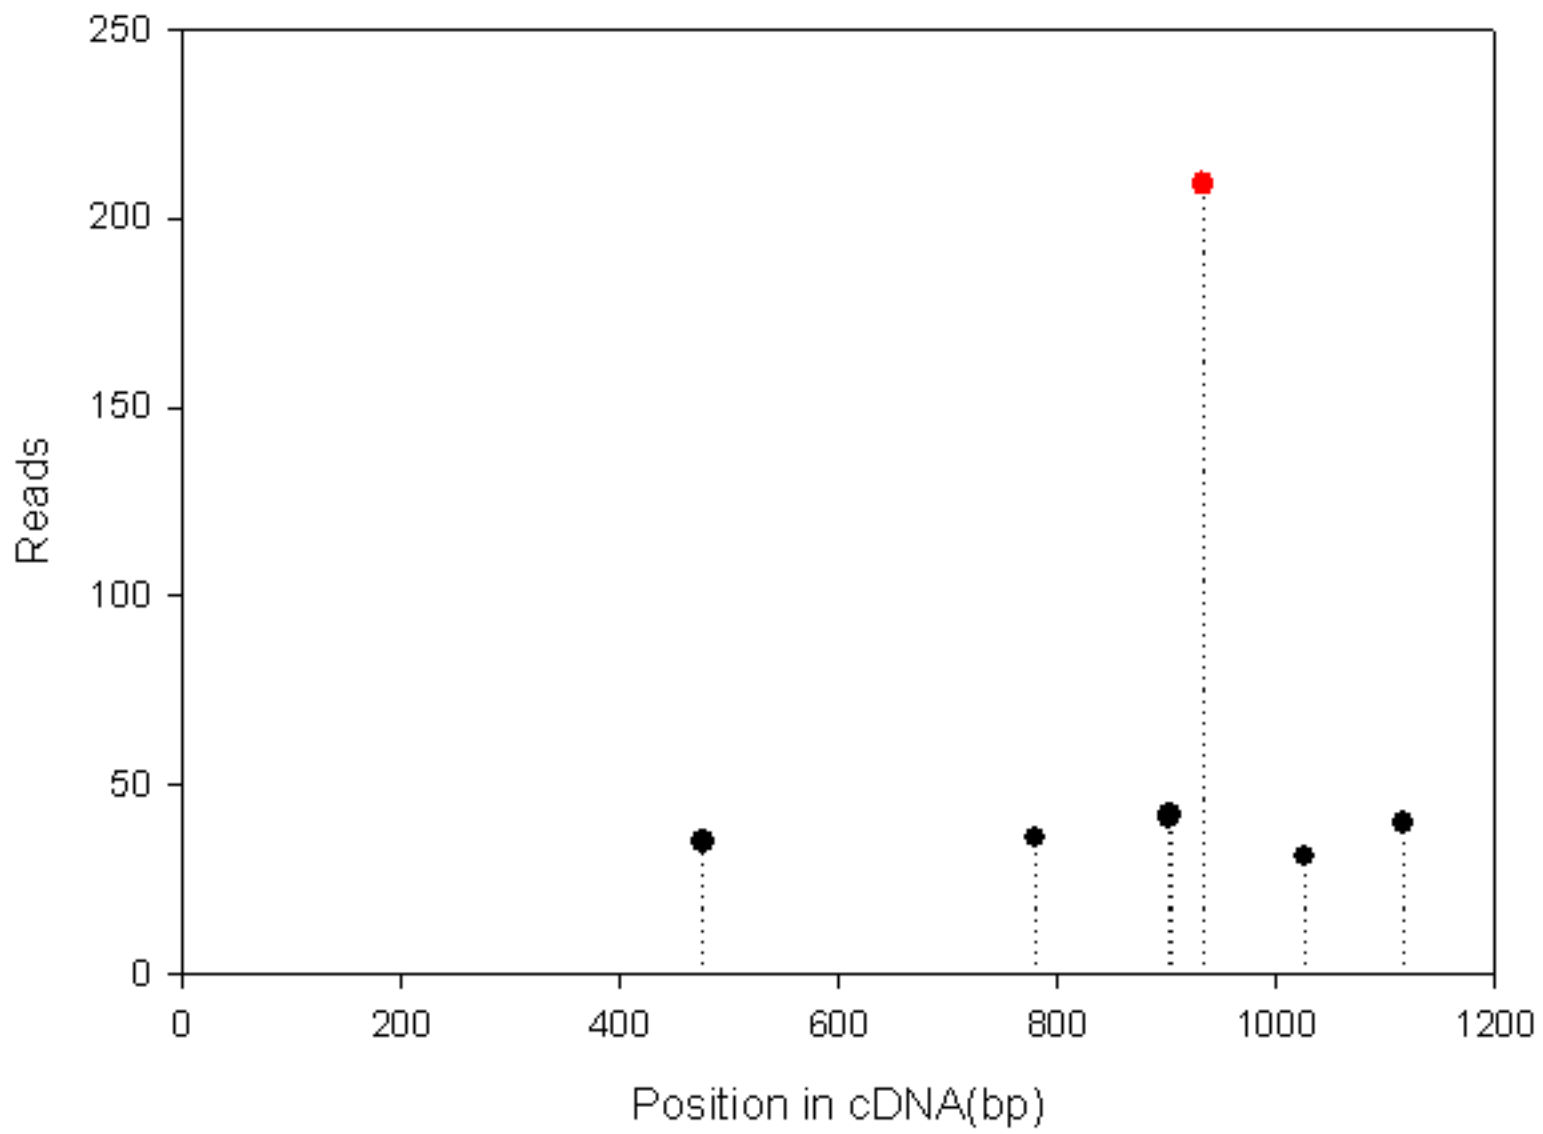

```

5' CAUGCUCUCUCUCUUCUGUCAUCCUA 3'      Cs2g23550.1
   : : : : : : : : : : : : : : : :
3' ACACGAGUGAGAGAAGACAGU----- 5'    Csi-miR156c.1
  
```

Csi-miR156c.1, target=Cs3g10870.1 gene=Cs3g10870  
 Category:1  
 Score=5  
 Cleavage Site=244



```

5' CUUCGUCCUC-UUCUUUUCUGUCAACA 3'      Cs3g10870.1
   :: ::: .:::::
3' ---ACACGAGUGAGAGAAGACAGU--- 5'      Csi-miR156c.1

```

Csi-miR156c.1, target=Cs5g12260.1 gene=Cs5g12260  
 Category:1  
 Score=3  
 Cleavage Site=1693

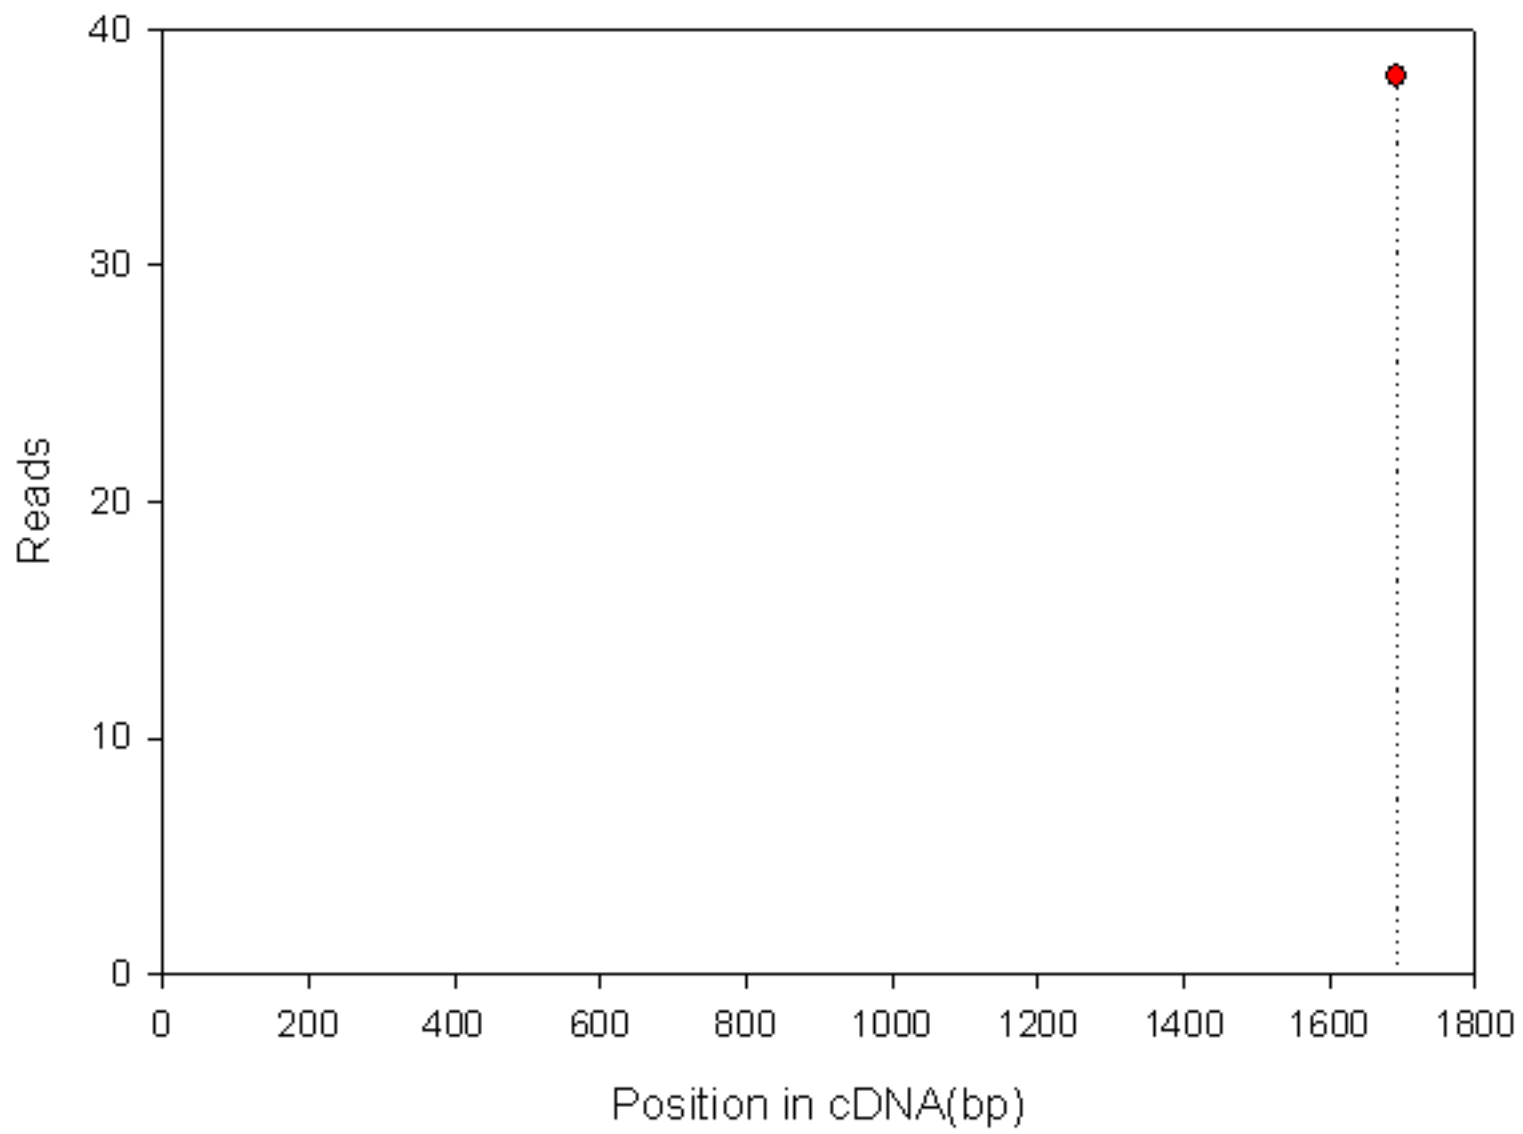

```

5' CUAUGCUCACCCUCUUCUGUCAUCUA 3'      Cs5g12260.1
   : : : : : : : : : : : : : : : :
3' -ACACGAGUGAGAGAAGACAGU----- 5'    Csi-miR156c.1

```



Csi-miR156c.1, target=Cs7g11770.1 gene=Cs7g11770  
 Category:1  
 Score=2  
 Cleavage Site=1487



```

5' UGGUGCUCUCUCUCUUCUGUCAGCUC 3'          Cs7g11770.1
   : : : : : : : : : : : : : : : : : :
3' -ACACGAGUGAGAGAAGACAGU----- 5'      Csi-miR156c.1
  
```

Csi-miR156d, target=Cs2g23550.1 gene=Cs2g23550  
 Category:1  
 Score=3.5  
 Cleavage Site=934



```

5' CAUGCUCUCUCUCUUCUGUCAUCCUA 3'      Cs2g23550.1
   . . . . . : . . . . .
3' -CGCGAGAGAUAGAAGACAGU----- 5'      Csi-miR156d
  
```

Csi-miR156d, target=Cs7g11770.1 gene=Cs7g11770  
 Category:1  
 Score=2.5  
 Cleavage Site=1487



```

5' UGGUGCUCUCUCUCUUCUGUCAGCUC 3'      Cs7g11770.1
   :.:.:.:.:.:.:.:.:.:.:.:.:.:.:.:
3' --CGCGAGAGAUAGAAGACAGU----- 5'    Csi-miR156d
  
```

Csi-miR156e, target=Cs2g23550.1 gene=Cs2g23550  
 Category:1  
 Score=4  
 Cleavage Site=934



```

5' CAUGCUCUCUCUCUUCUGUCAUCCUA 3'      Cs2g23550.1
   . : : : : : : : : : : : : : : .
3' -CGCGAGAGAUAGAAGACAGUG----- 5'    Csi-miR156e
  
```

Csi-miR156e, target=Cs4g07790.1 gene=Cs4g07790  
 Category:3  
 Score=5  
 Cleavage Site=424

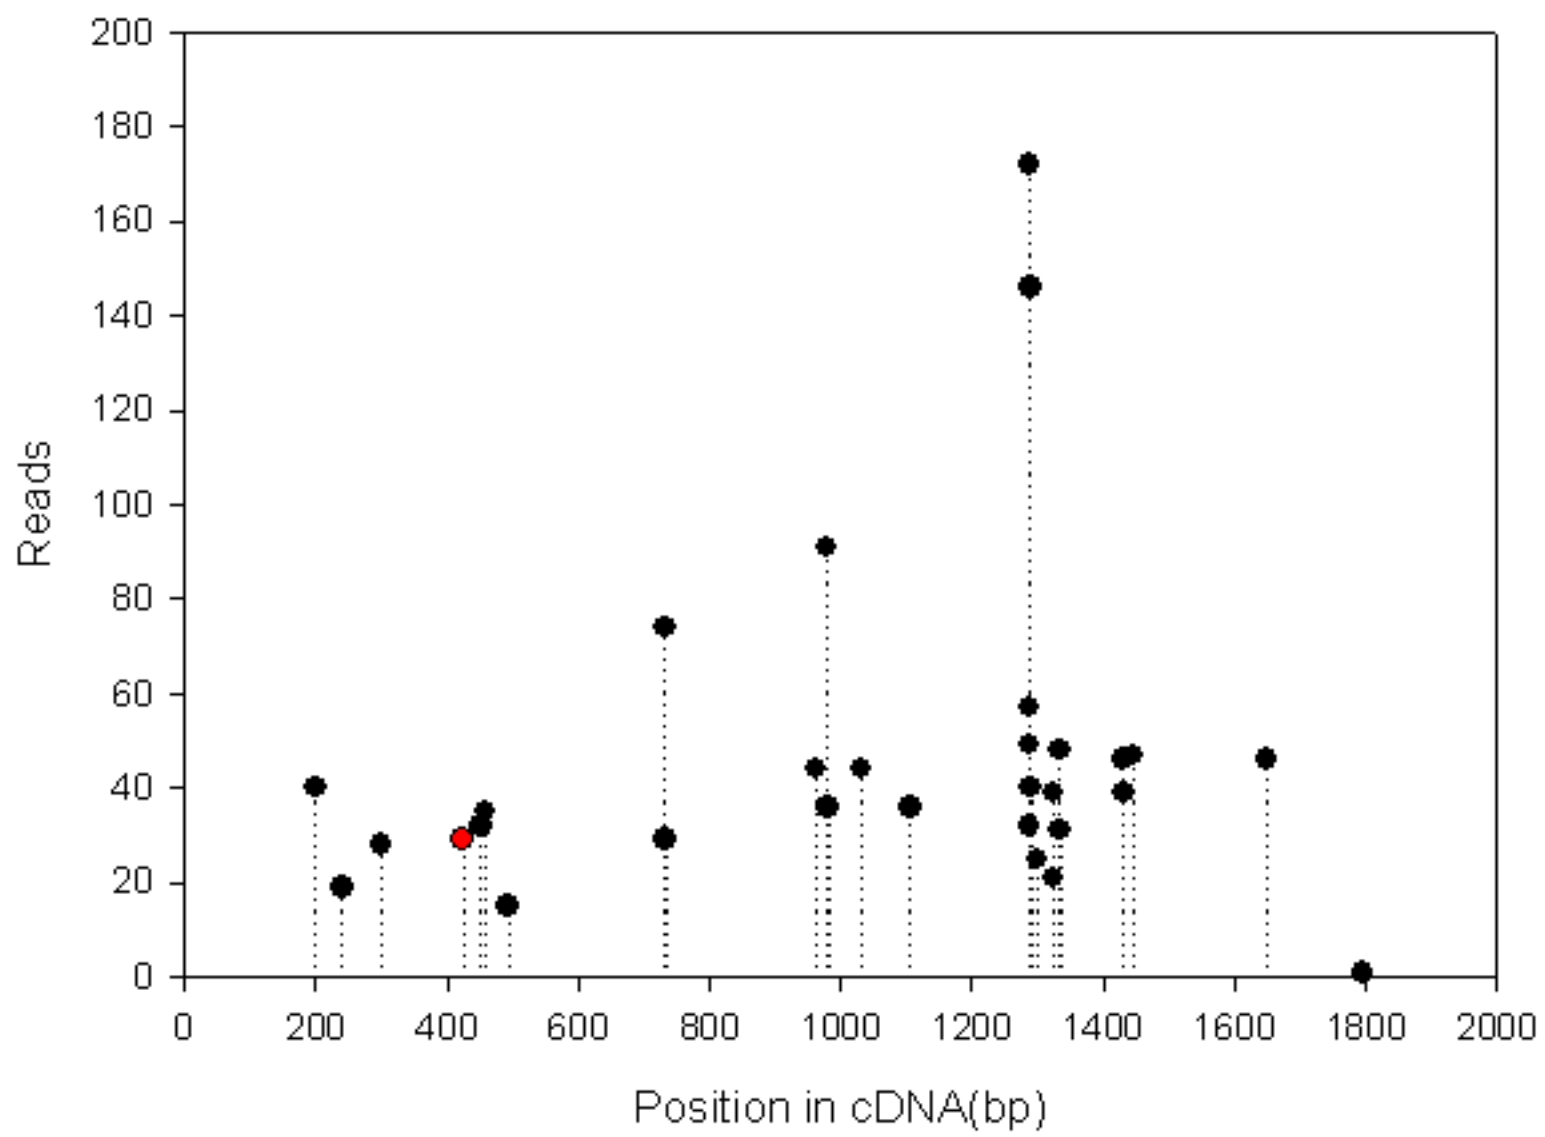

```

5' GCAAUGGUGAUCUUUG-CUUCUGUCAC 3'      Cs4g07790.1
   :  :  :  :  :  :  :  :  :  :  :
3' -----CGCGAGAGAUAGAAGACAGUG 5'      Csi-miR156e
  
```



Csi-miR156f.2, target=Cs2g23550.1 gene=Cs2g23550  
 Category:1  
 Score=1.5  
 Cleavage Site=934

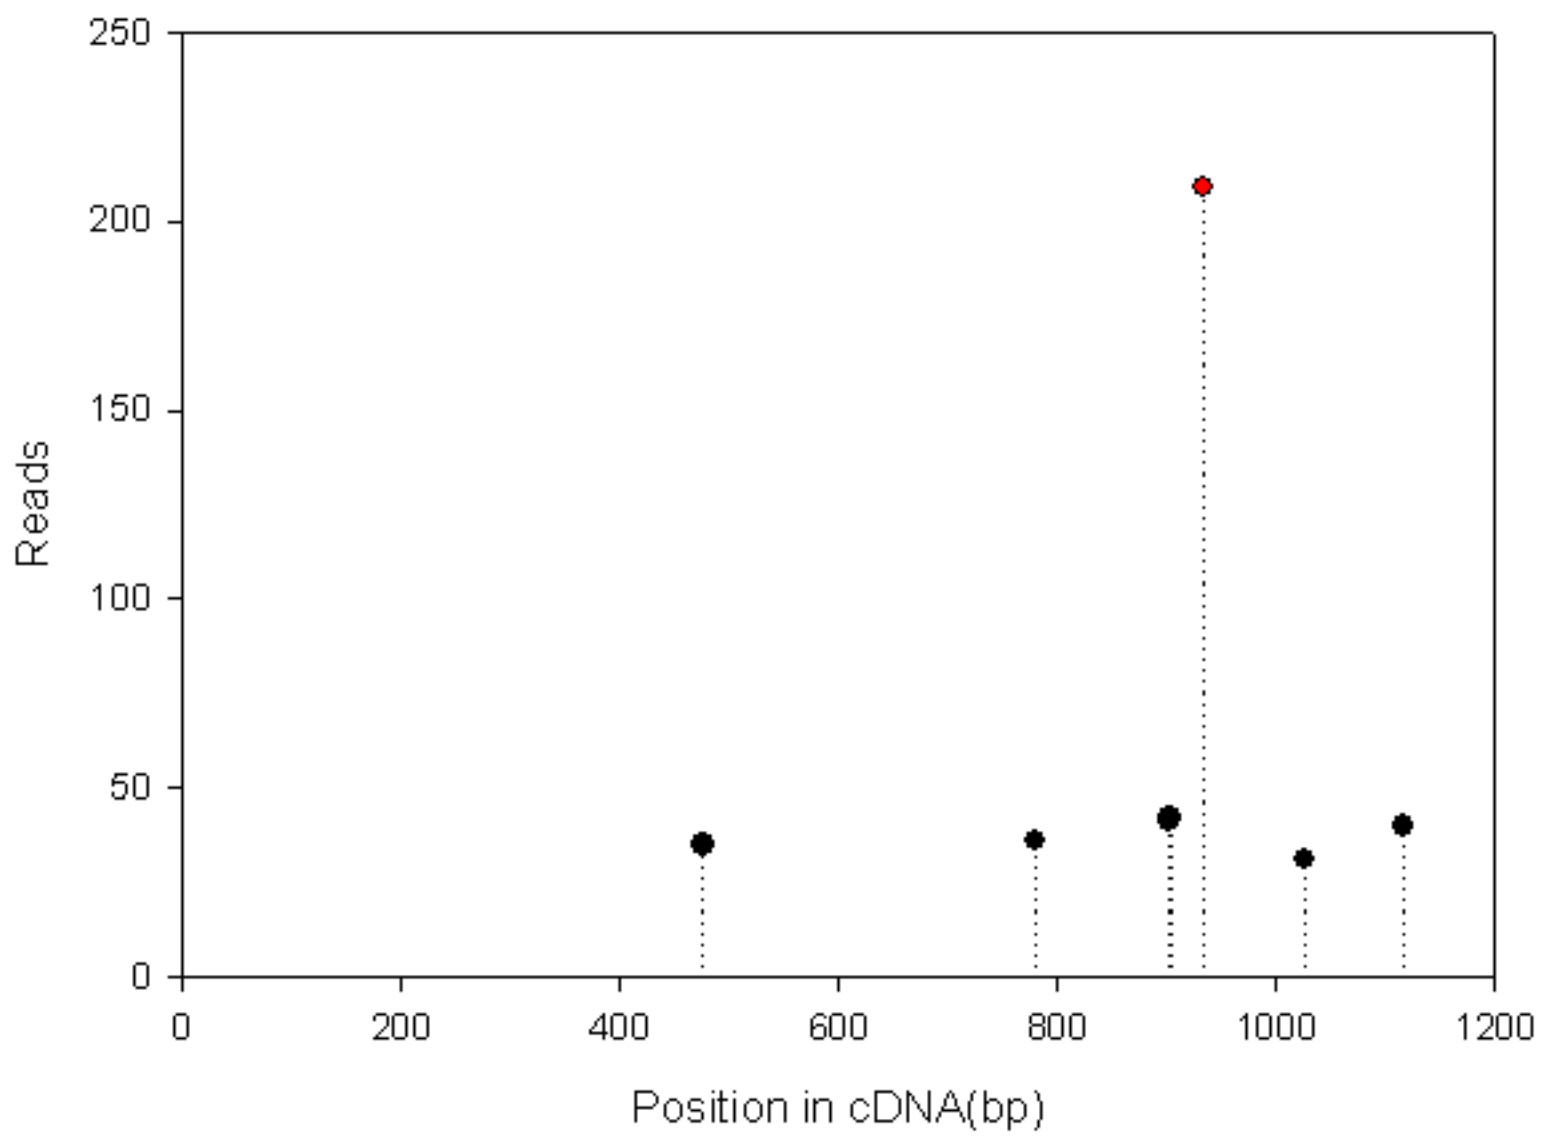

```

5' CAUGCUCUCUCUCUUCUGUCAUCCUA 3'          Cs2g23550.1
   ::::::::::::::::::::
3' -CAUGAGAGAGAGAAGACAGUA----- 5'      Csi-miR156f.2

```

Csi-miR156f.2, target=Cs3g10870.1 gene=Cs3g10870  
 Category:1  
 Score=4  
 Cleavage Site=244



```

5' CUUCGUCCUCU-UCUUUCUGUCAACA 3'      Cs3g10870.1
   :: : : : : : : : : : : : : : :
3' ----CAUGAGAGAGAGAAGACAGUA-- 5'      Csi-miR156f.2
  
```



Csi-miR156f.2, target=Cs5g12260.1 gene=Cs5g12260  
 Category:1  
 Score=4.5  
 Cleavage Site=1693

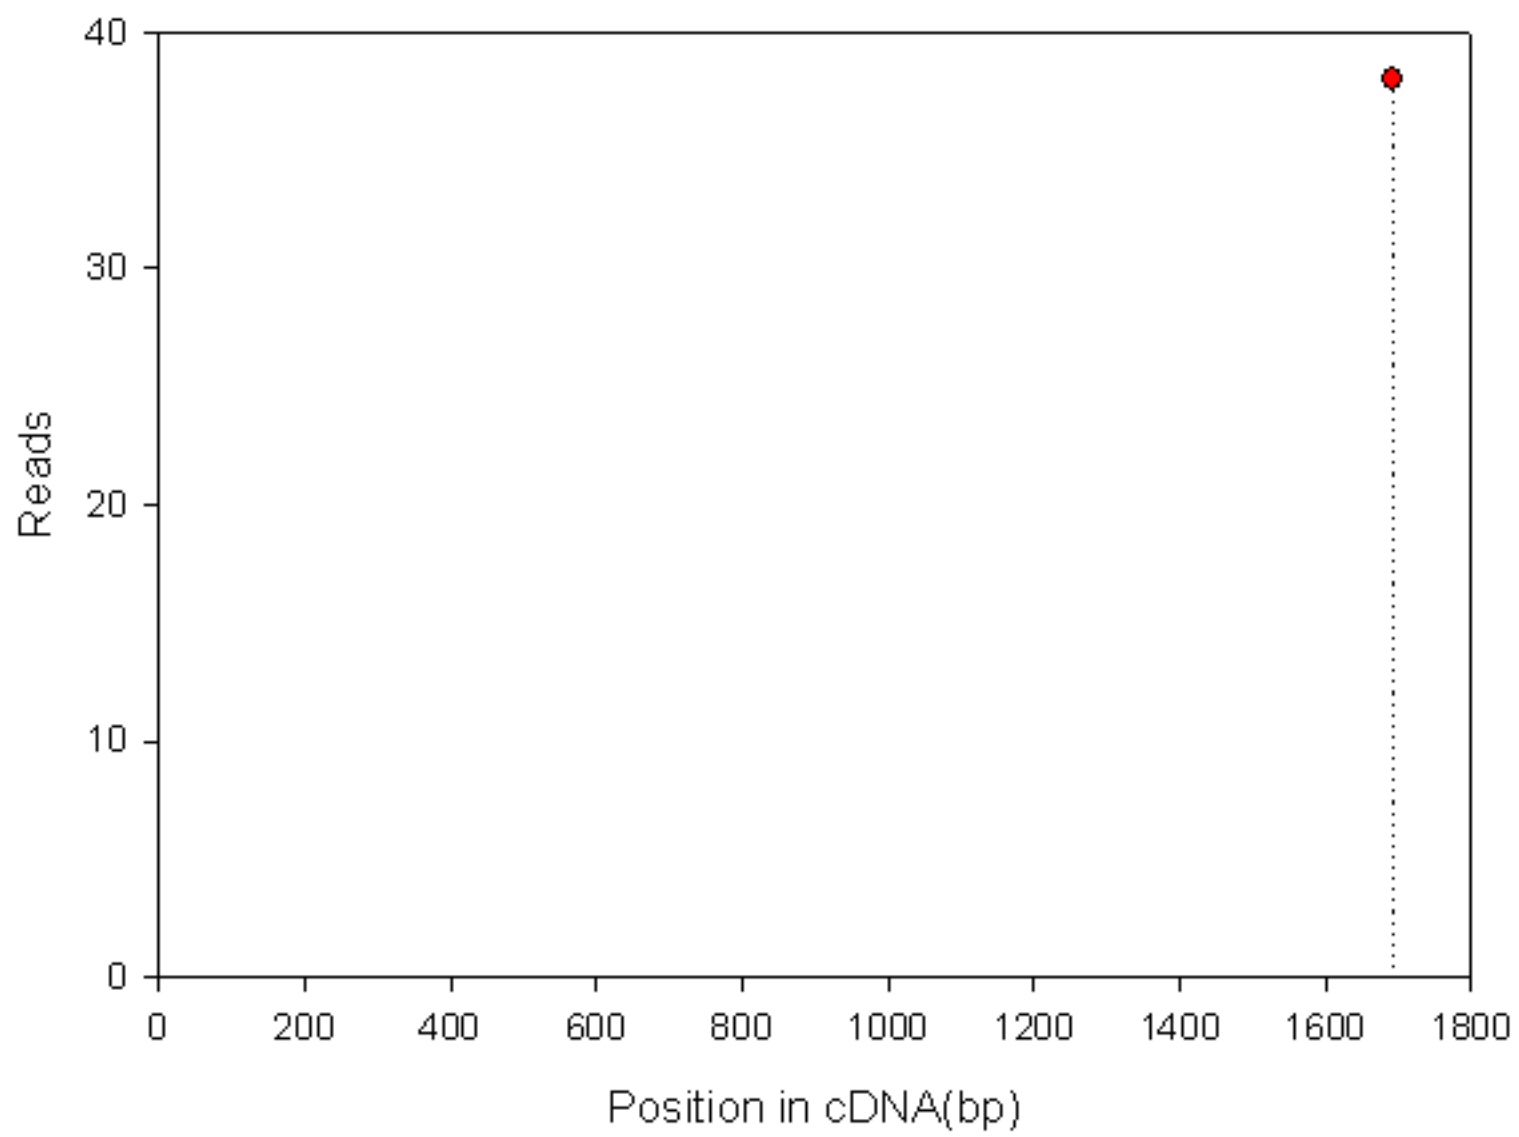

```

5' CUAUGCUCACCCUCUUCUGUCAUCUA 3'      Cs5g12260.1
   :. . . . : : . . . . . . . . . .
3' --CAUGAGAGAGAGAAGACAGUA--- 5'      Csi-miR156f.2
  
```

Csi-miR156f.2, target=Cs7g11770.1 gene=Cs7g11770  
Category:1  
Score=1.5  
Cleavage Site=1487



```
5' UGGUGCUCUCUCUCUUCUGUCAGCUC 3'      Cs7g11770.1
      ::::::::::::::::::::
3' --CAUGAGAGAGAGAAGACAGUA--- 5'      Csi-miR156f.2
```

Csi-miR156f.2, target=Cs8g19900.1 gene=Cs8g19900  
 Category:2  
 Score=5  
 Cleavage Site=2794

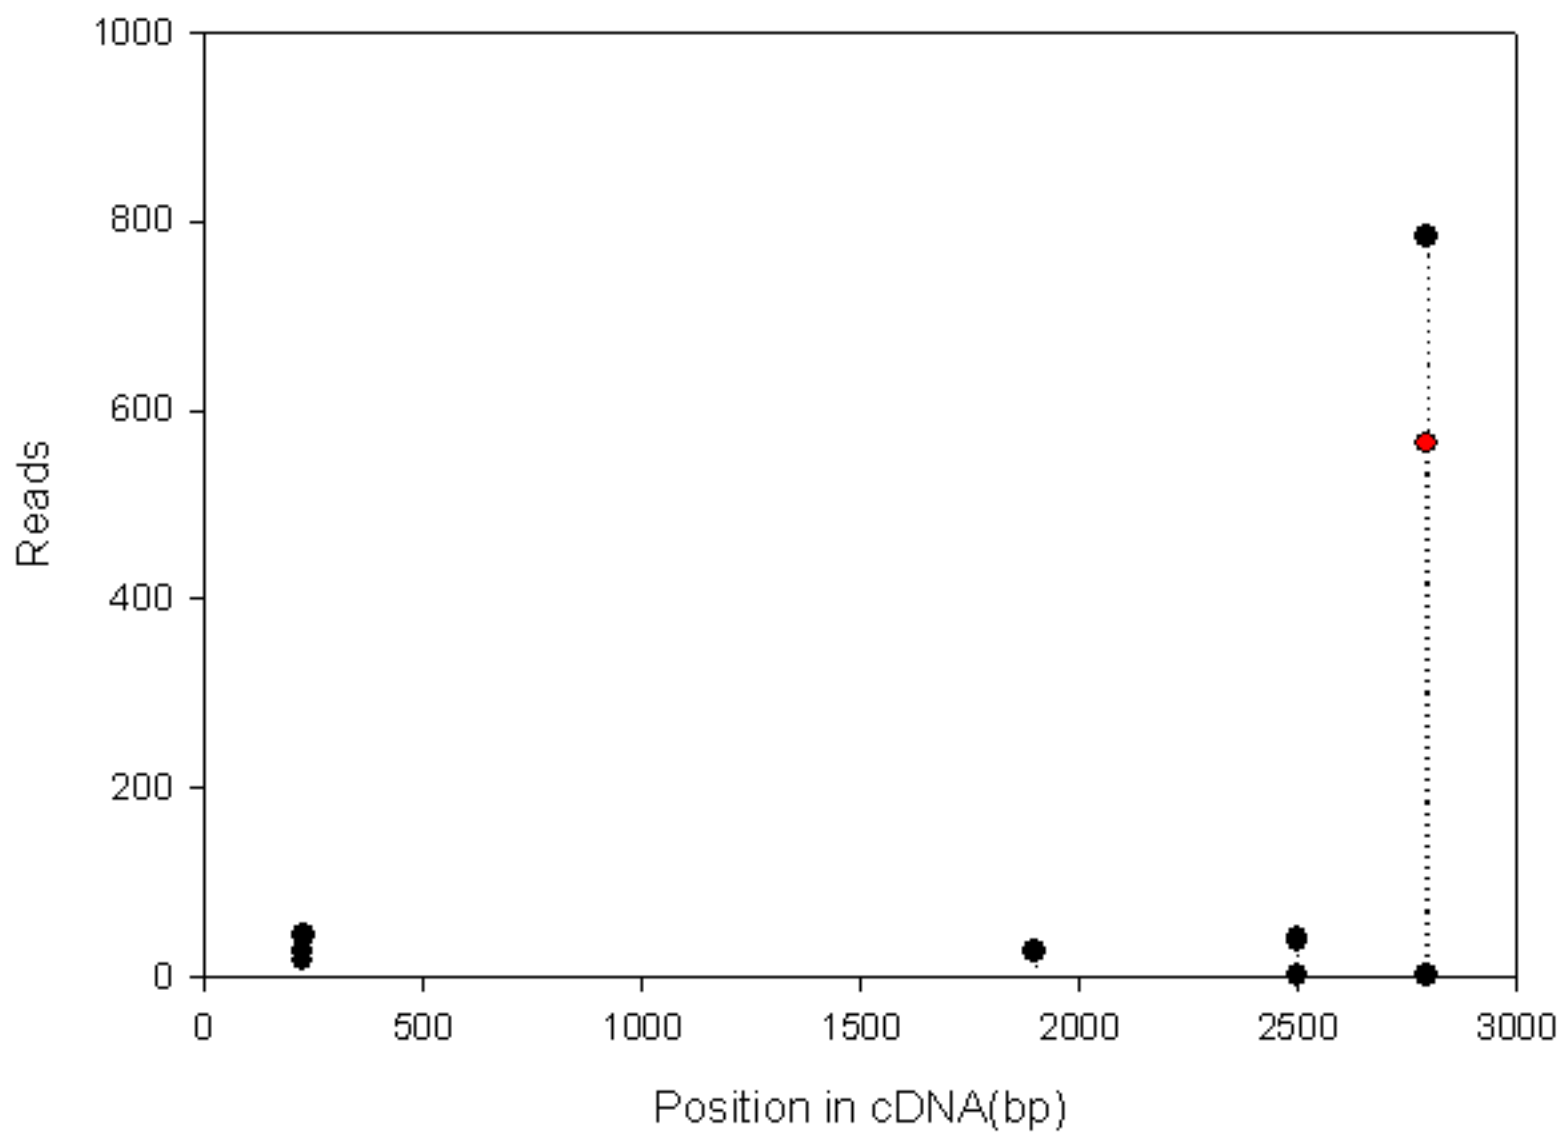

```

5' GUG-UCUUUCUCUUUUGACAUAUAUGAG 3'      Cs8g19900.1
... ..
3' CAUGAGAGAGAGAAGACAGUA----- 5'      Csi-miR156f.2
  
```

Csi-miR156f.2, target=Orange1.1t01983.1 gene=Orange1.1t01983  
 Category:3  
 Score=3.5  
 Cleavage Site=693



5' CUUGCUUCUGUCUCUUCUGUCAUCAC 3'  
 . . . . .  
 3' -CAUG-AGAGAGAGAAGACAGUA--- 5'

Orange1.1t01983.1  
 Csi-miR156f.2

Csi-miR156g.1, target=Cs2g23550.1 gene=Cs2g23550  
 Category:1  
 Score=5  
 Cleavage Site=934



5' CAUGCUCUCUCUCUUCUGUCAUCCUA 3'  
 :::::::::: ::::::::::  
 3' -CACGAGAGAUAGAAGGCAGUU---- 5'

Cs2g23550.1

Csi-miR156g.1

Csi-miR156g.1, target=Cs7g11770.1 gene=Cs7g11770  
 Category:1  
 Score=3.5  
 Cleavage Site=1487



```

5' UGGUGCUCUCUCUCUUCUGUCAGCUC 3'      Cs7g11770.1
   ::::::::::: :::::::::::
3' --CACGAGAGAUAGAAGGCAGUU--- 5'      Csi-miR156g.1
  
```

Csi-miR156g.2, target=Cs2g23550.1 gene=Cs2g23550  
 Category:1  
 Score=4  
 Cleavage Site=934



```

5' CAUGCUCUCUCUCUUCUGUCAUCCUA 3'      Cs2g23550.1
   :::::::::: ::::::::::
3' -CACGAGAGAUAGAAGGCAGU----- 5'      Csi-miR156g.2
  
```

Csi-miR156g.2, target=Cs7g11770.1 gene=Cs7g11770  
 Category:1  
 Score=3  
 Cleavage Site=1487



```

5' UGGUGCUCUCUCUCUUCUGUCAGCUC 3'      Cs7g11770.1
   ::::::::::: :::::::::::
3' --CACGAGAGAUAGAAGGCAGU---- 5'      Csi-miR156g.2
  
```



Csi-miR156h, target=Cs1g26030.1 gene=Cs1g26030  
 Category:1  
 Score=5  
 Cleavage Site=1018

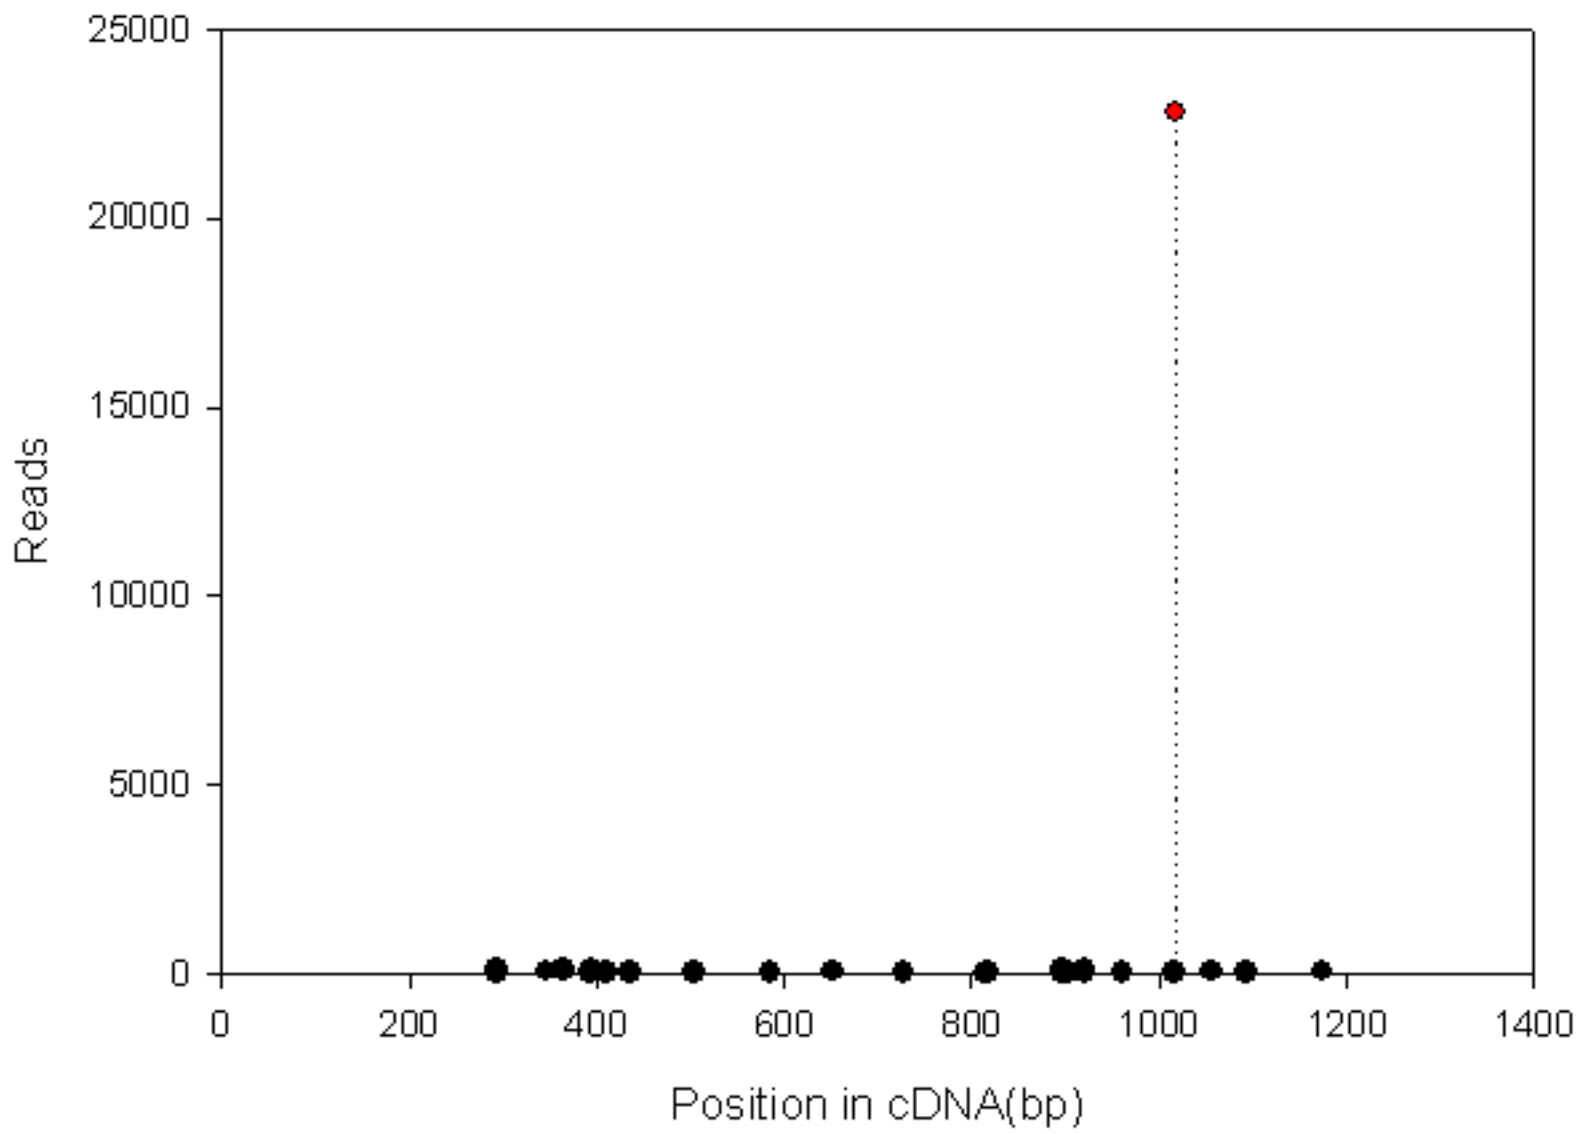

```

5' GUGCAUUUUCUUUUCUGUAAAUAACU 3'      Cs1g26030.1
   : : : : . : : : : : : : : : : : : :
3' CACGAGAGAGAGAAGACAGUU----- 5'      Csi-miR156h
  
```

Csi-miR156h, target=Cs2g23550.1 gene=Cs2g23550  
 Category:1  
 Score=2  
 Cleavage Site=934



```

5' CAUGCUCUCUCUCUUCUGUCAUCCUA 3'      Cs2g23550.1
   ::::::::::::::::::::
3' -CACGAGAGAGAGAAGACAGUU----- 5'    Csi-miR156h
  
```

Csi-miR156h, target=Cs3g10870.1 gene=Cs3g10870  
 Category:1  
 Score=3  
 Cleavage Site=244

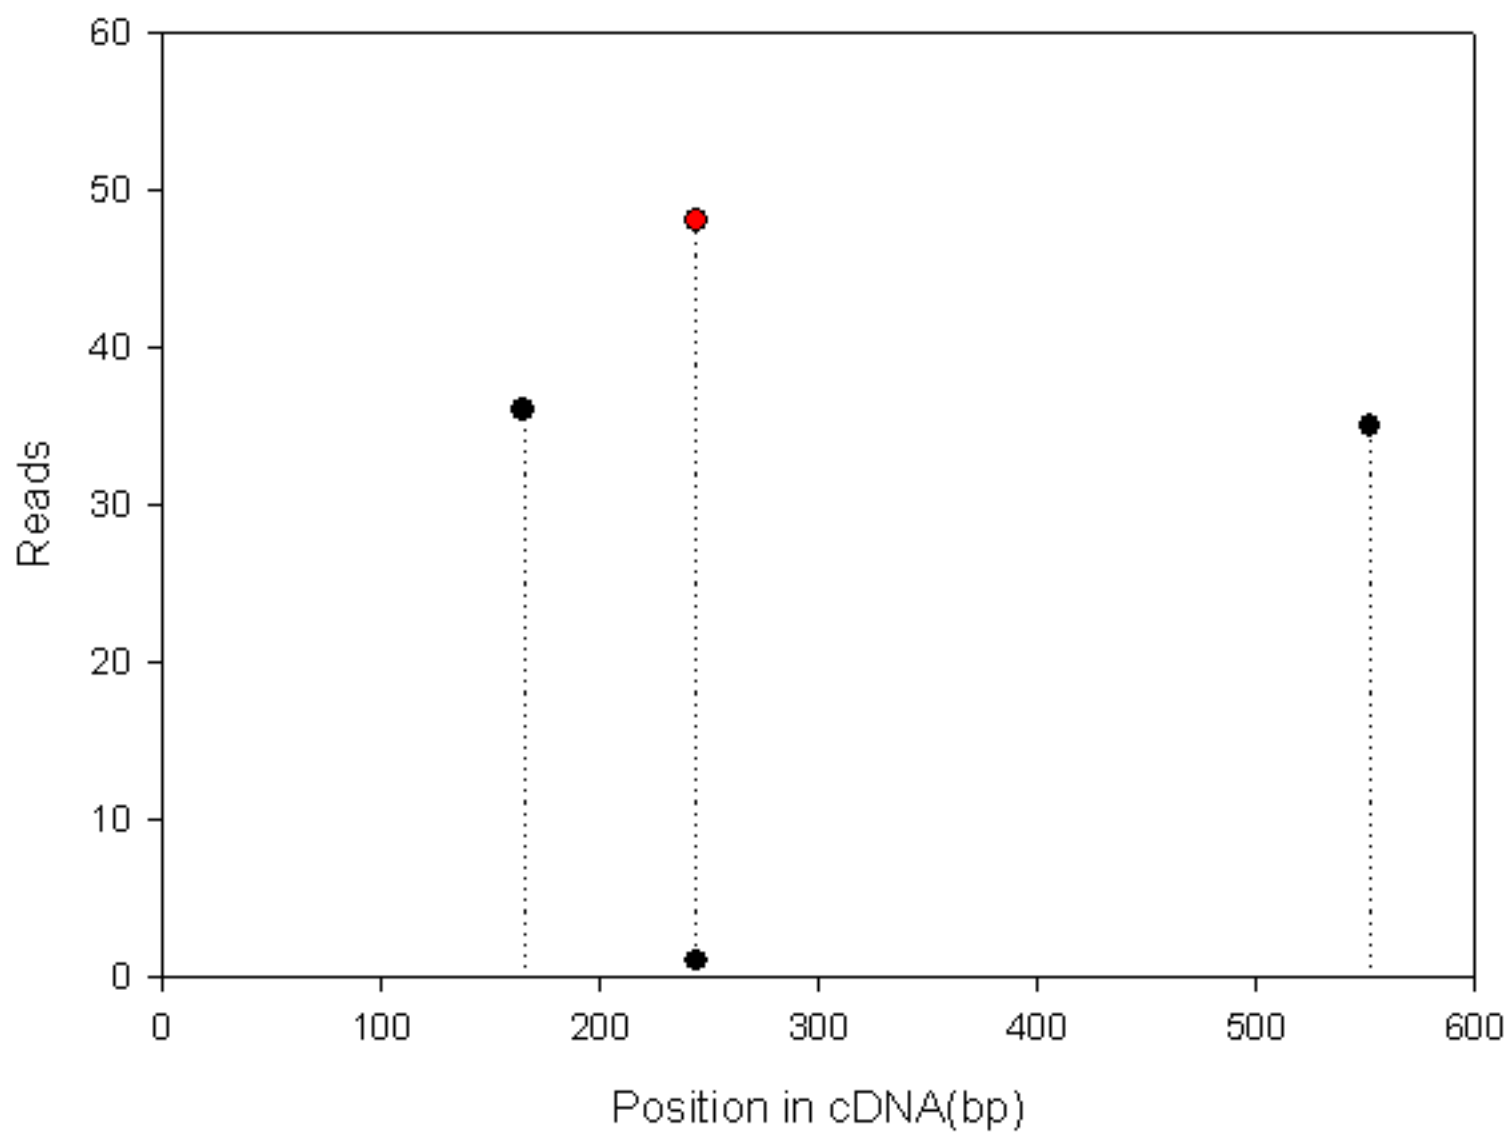

```

5' CUUCGUCCUCU-UCUUUUCUGUCAACA 3'      Cs3g10870.1
   ::  ::::  :::.:::
3' ----CACGAGAGAGAGAAGACAGUU-- 5'      Csi-miR156h

```

Csi-miR156h, target=Cs5g12260.1 gene=Cs5g12260  
Category:1  
Score=5  
Cleavage Site=1693

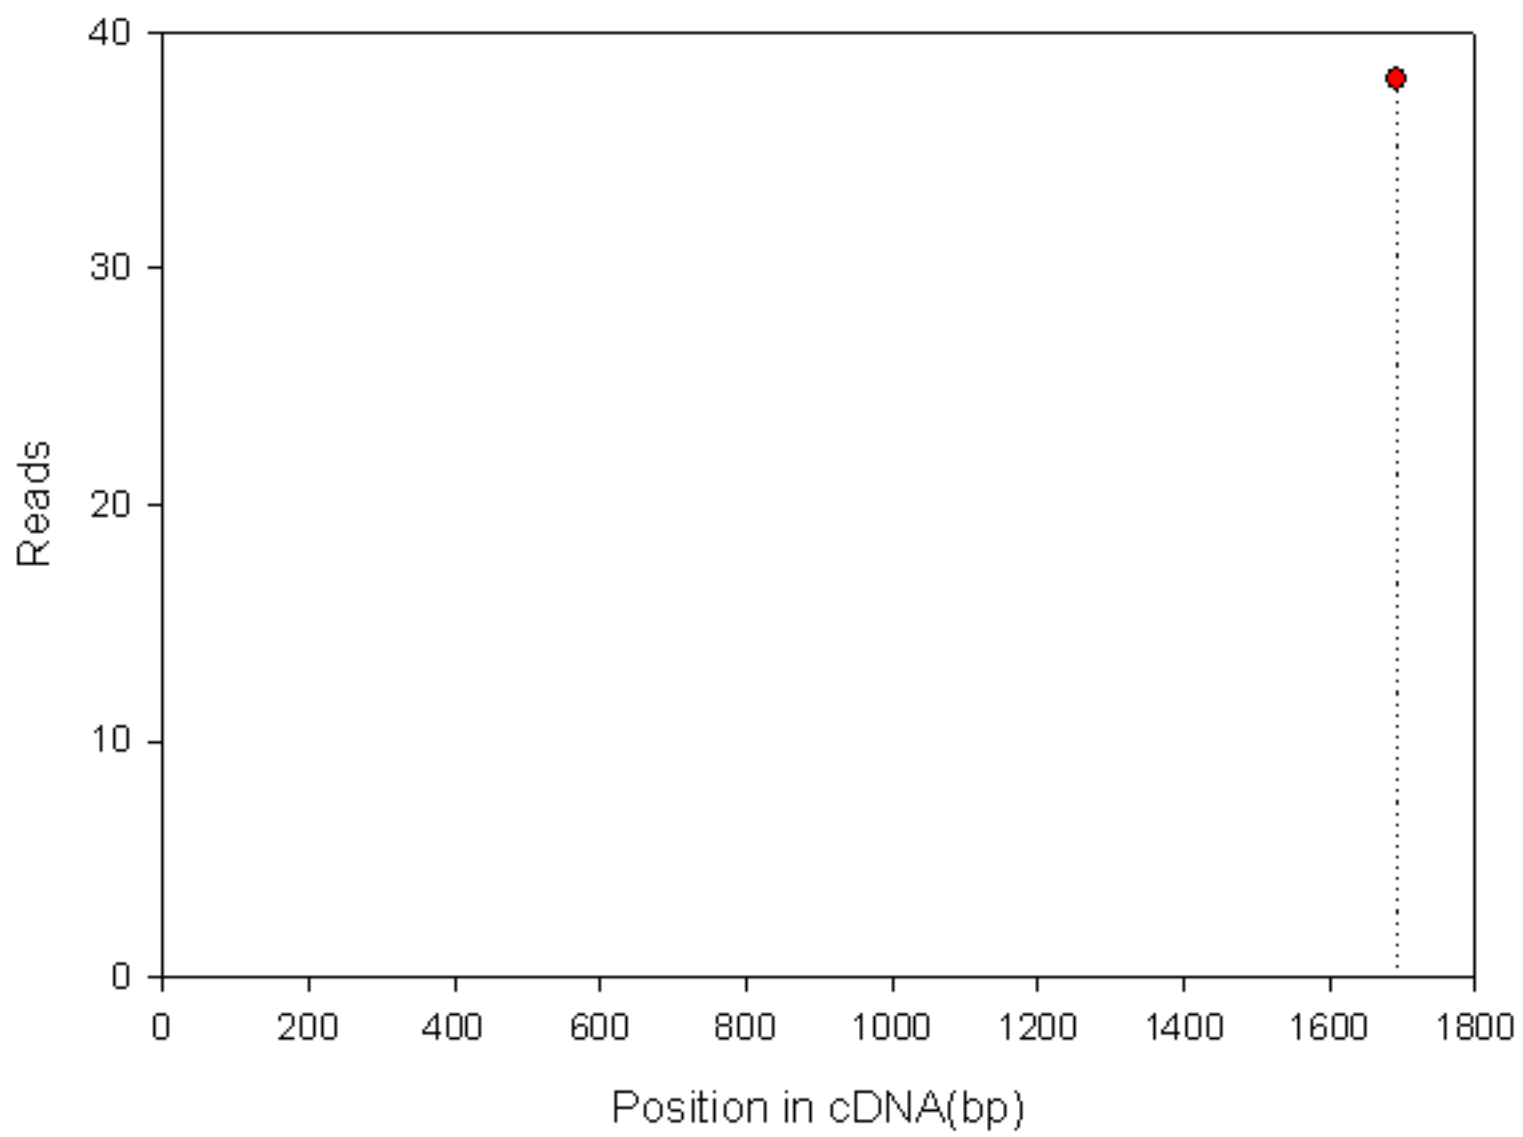

```
5' CUAUGCUCACCCUCUUCUGUCAUCUA 3'          Cs5g12260.1
      : : : : : : : : : : : : : : : : : :
3' --CACGAGAGAGAGAAGACAGUU--- 5'          Csi-miR156h
```

Csi-miR156h, target=Cs7g11770.1 gene=Cs7g11770  
 Category:1  
 Score=0.5  
 Cleavage Site=1487



```

5' UGGUGCUCUCUCUCUCUUCUGUCAGCUC 3'      Cs7g11770.1
   ::::::::::::::::::::.
3' --CACGAGAGAGAGAAGACAGUU--- 5'      Csi-miR156h
  
```

Csi-miR156h, target=Orange1.1t01983.1 gene=Orange1.1t01983  
 Category:3  
 Score=4  
 Cleavage Site=693

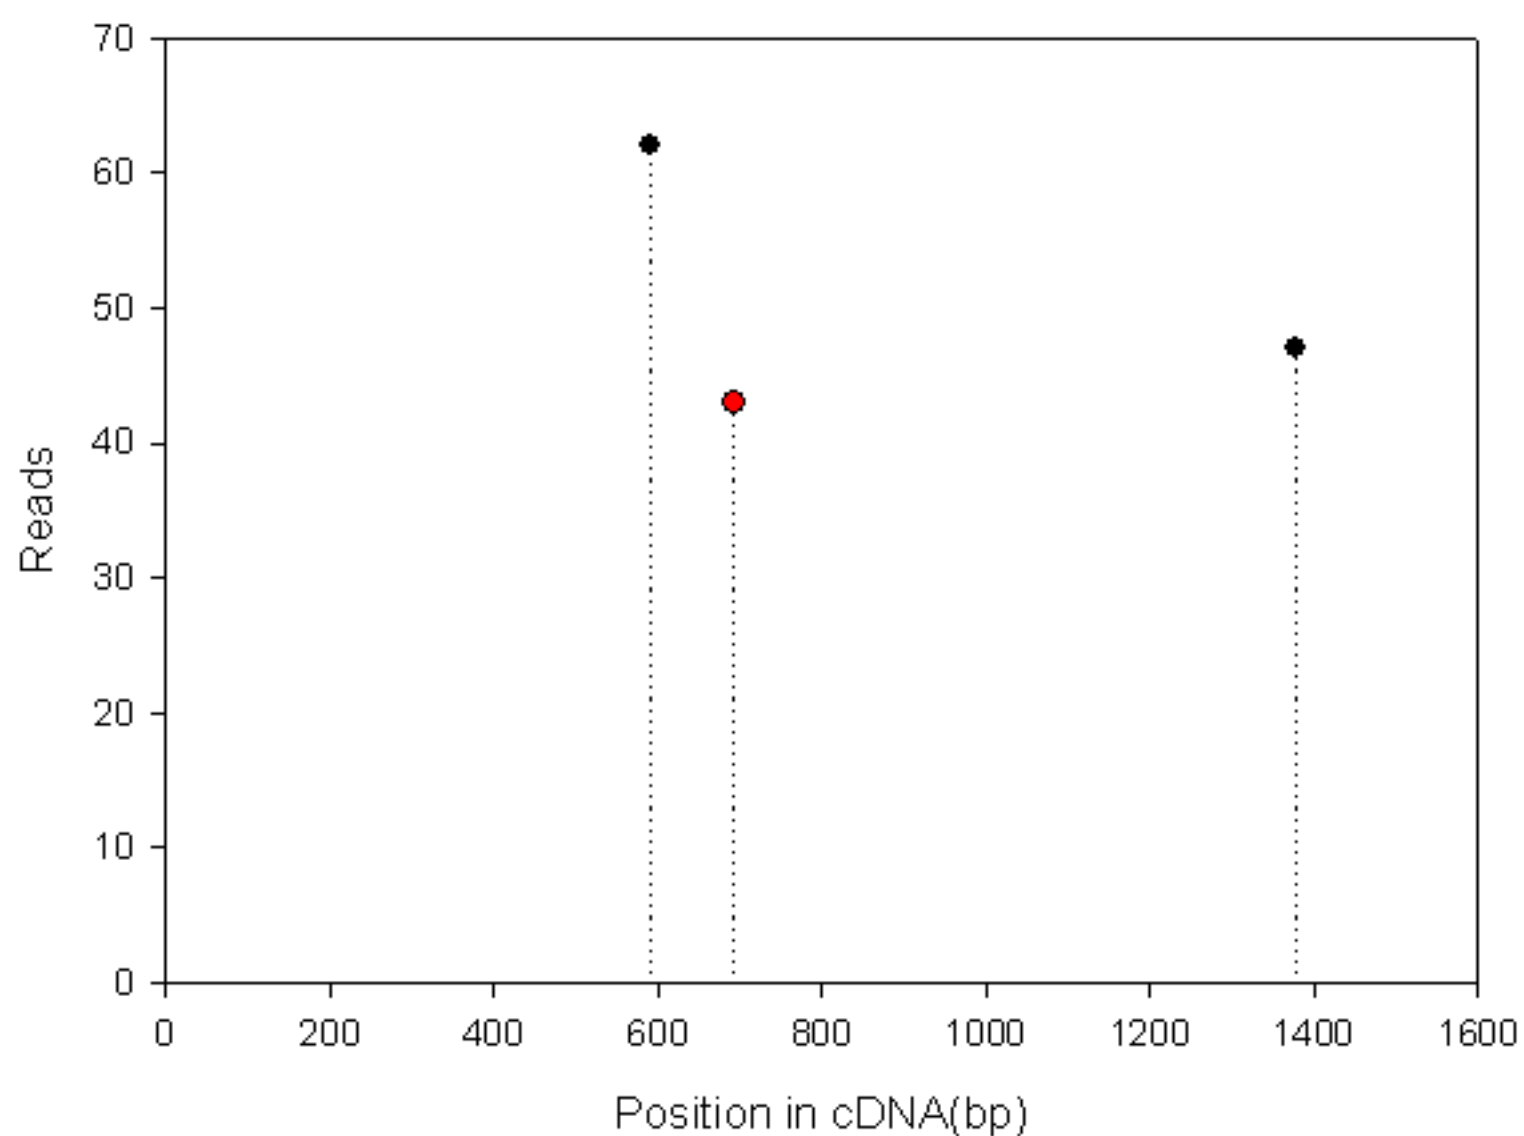

```

5' CUUGCUUCUGUCUCUUCUGUCAUCAC 3'      Orange1.1t01983.1
   :::  :::  ::::::::::::::
3' -CACG-AGAGAGAGAAGACAGUU--- 5'      Csi-miR156h
  
```

Csi-miR159, target=Cs3g10900.1 gene=Cs3g10900  
 Category:3  
 Score=3.5  
 Cleavage Site=1442

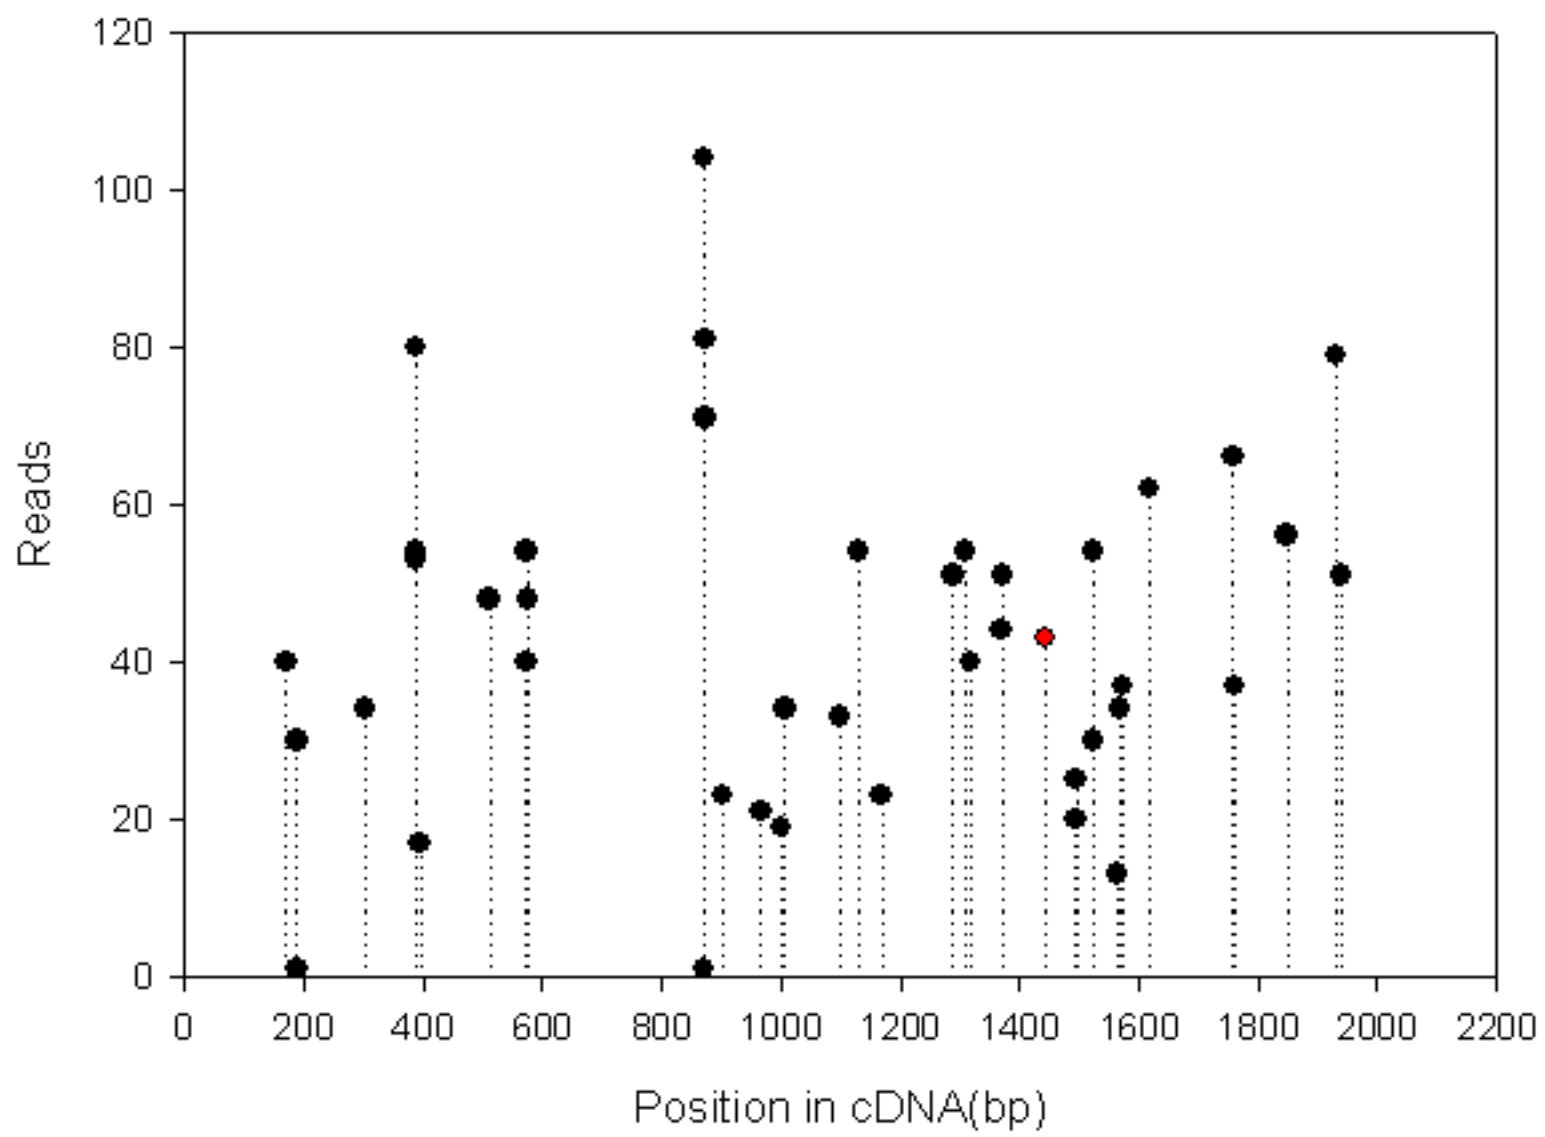

```

5' UGCAG-UCCUUC AAUCCAAGGCACUU 3'      Cs3g10900.1
   ..  ..  ..  ..  ..  ..  ..  ..  ..
3' AUCUCGAGGGAAGUUAGGUUU----- 5'      Csi-miR159
  
```

Csi-miR159, target=Cs6g10950.1 gene=Cs6g10950  
 Category:3  
 Score=4  
 Cleavage Site=5461

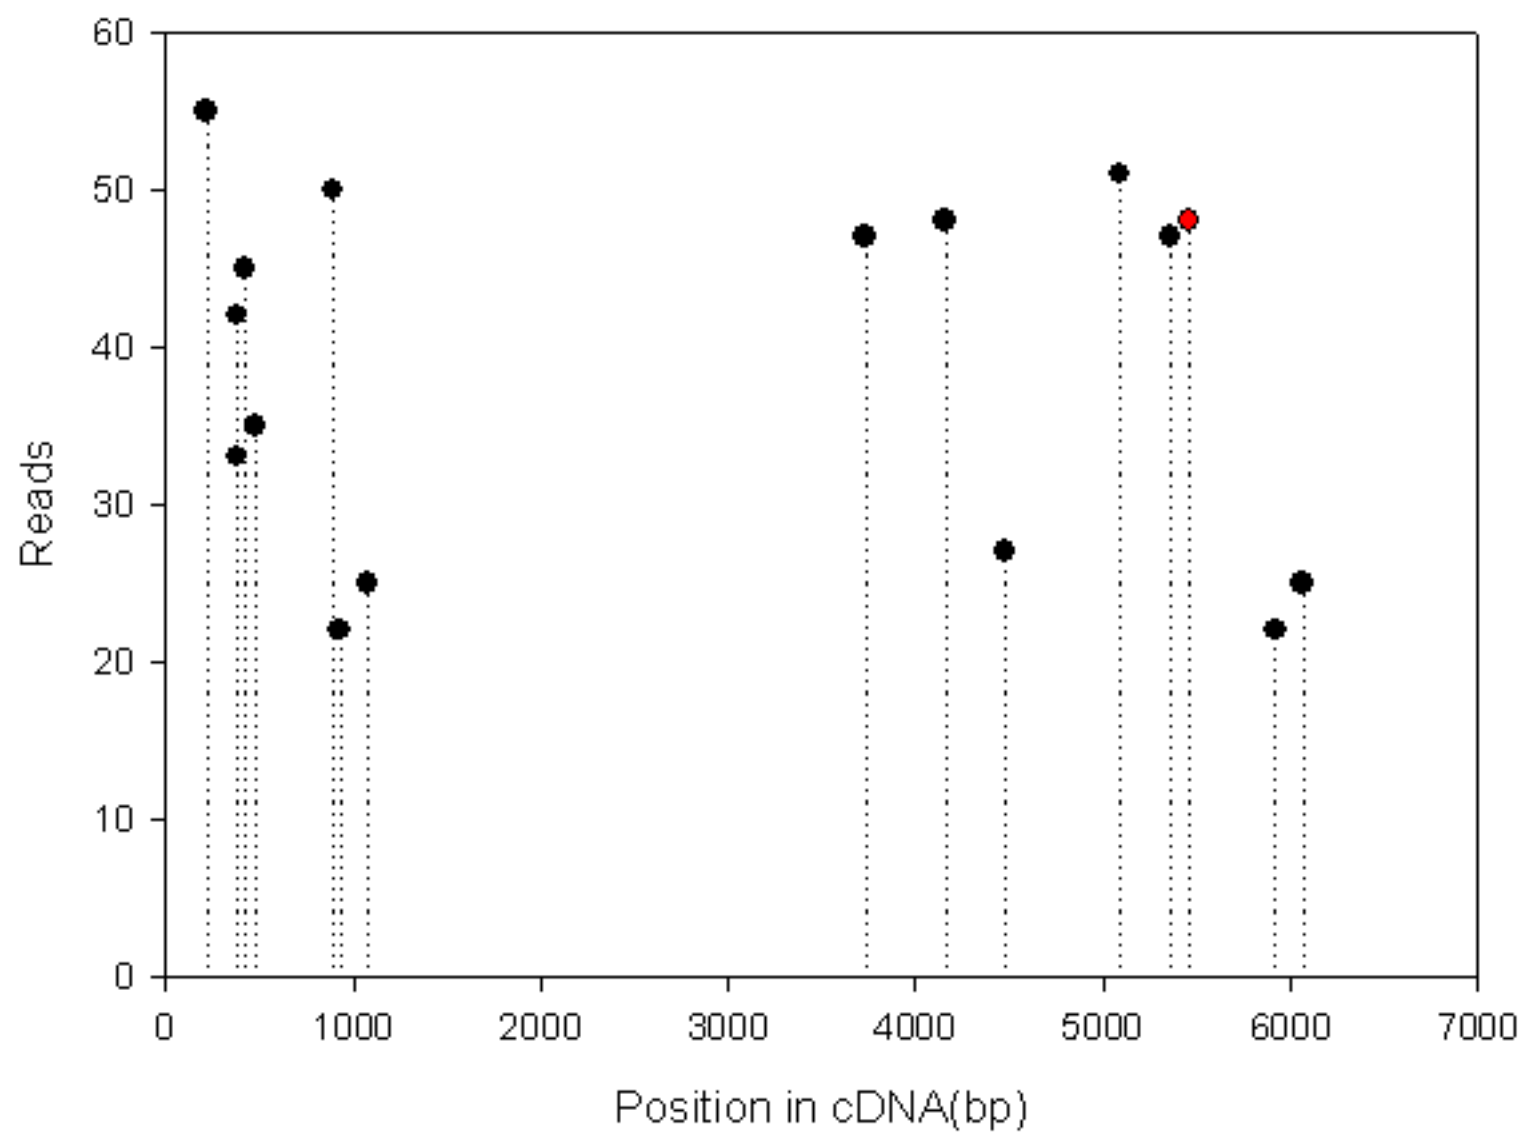

```

5' AAGAGCUCUACUUCAAUCCAAGCUUU 3'      Cs6g10950.1
   ::::::::::. ::::::::::::::.
3' AUCUCGAGG-GAAGUUAGGUUU----- 5'    Csi-miR159
  
```



Csi-miR159, target=Cs8g05120.1 gene=Cs8g05120  
 Category:1  
 Score=4  
 Cleavage Site=205

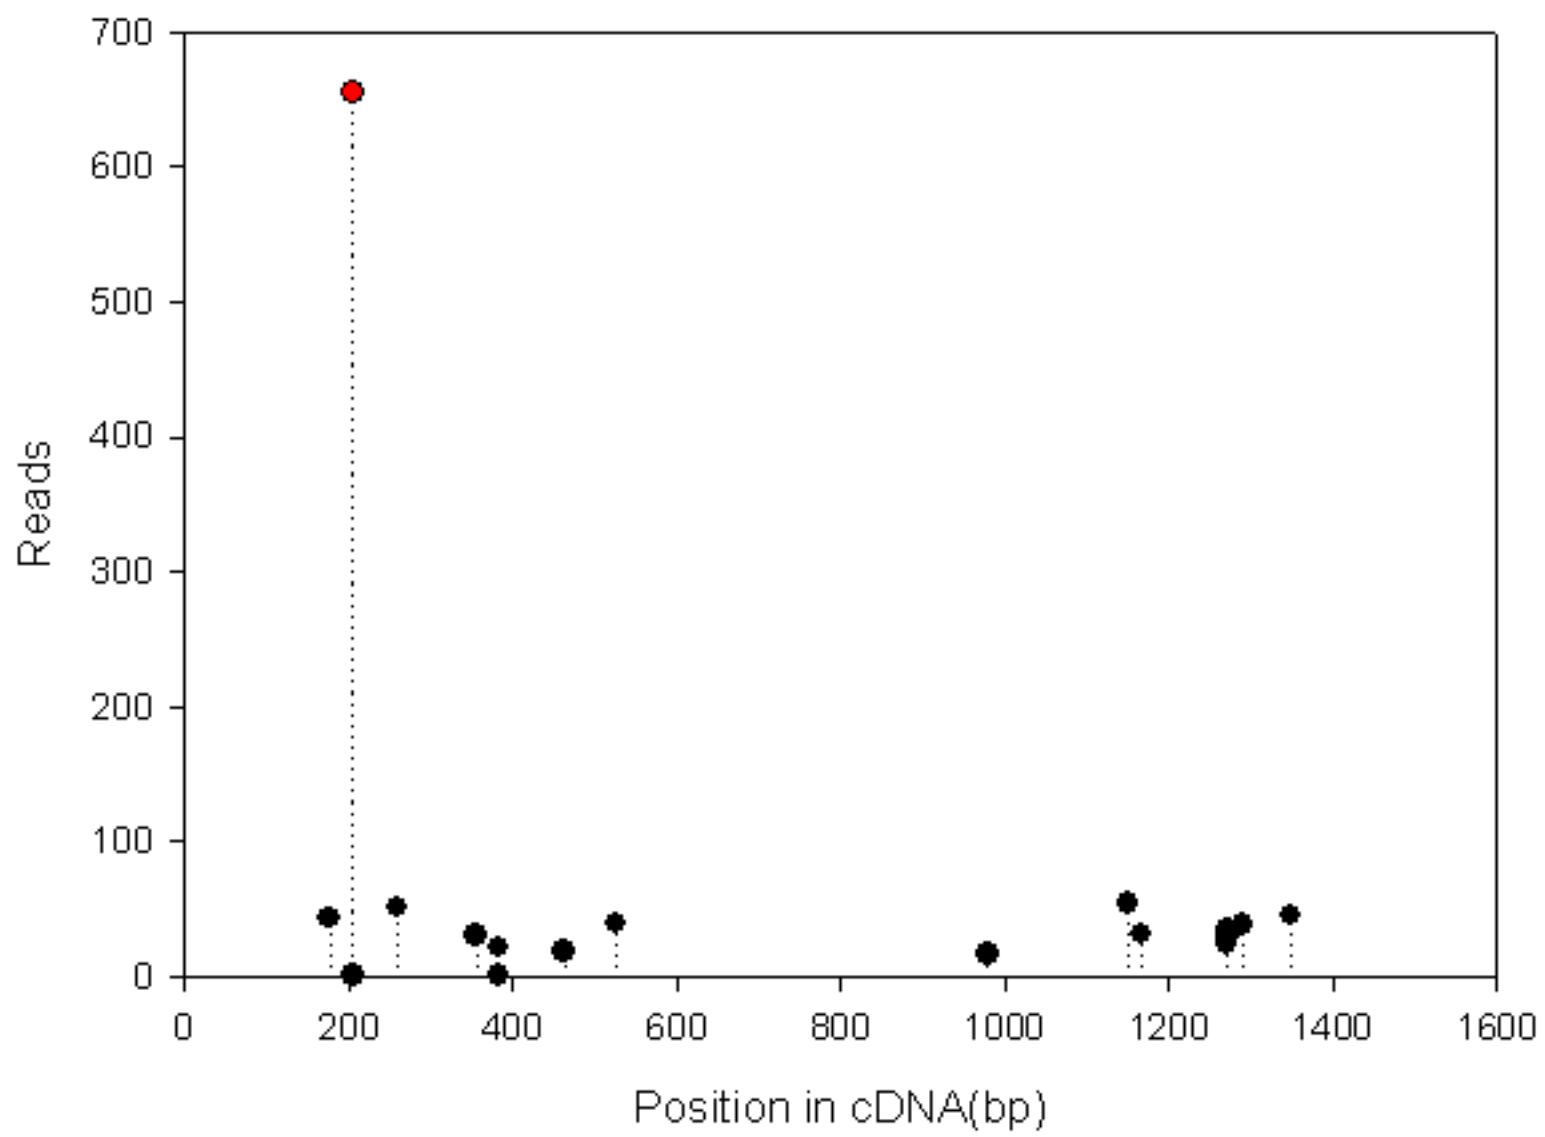

```

5' AUGAAGCUCUCUCAAUCUCAAACGC 3'      Cs8g05120.1
   .. : : : : : : : : : : : : : : :
3' -AUCUCGAGGGAAGUUAG-GUUU--- 5'      Csi-miR159
  
```

Csi-miR162-3p.2, target=Cs7g27400.1 gene=Cs7g27400  
 Category:3  
 Score=5  
 Cleavage Site=770

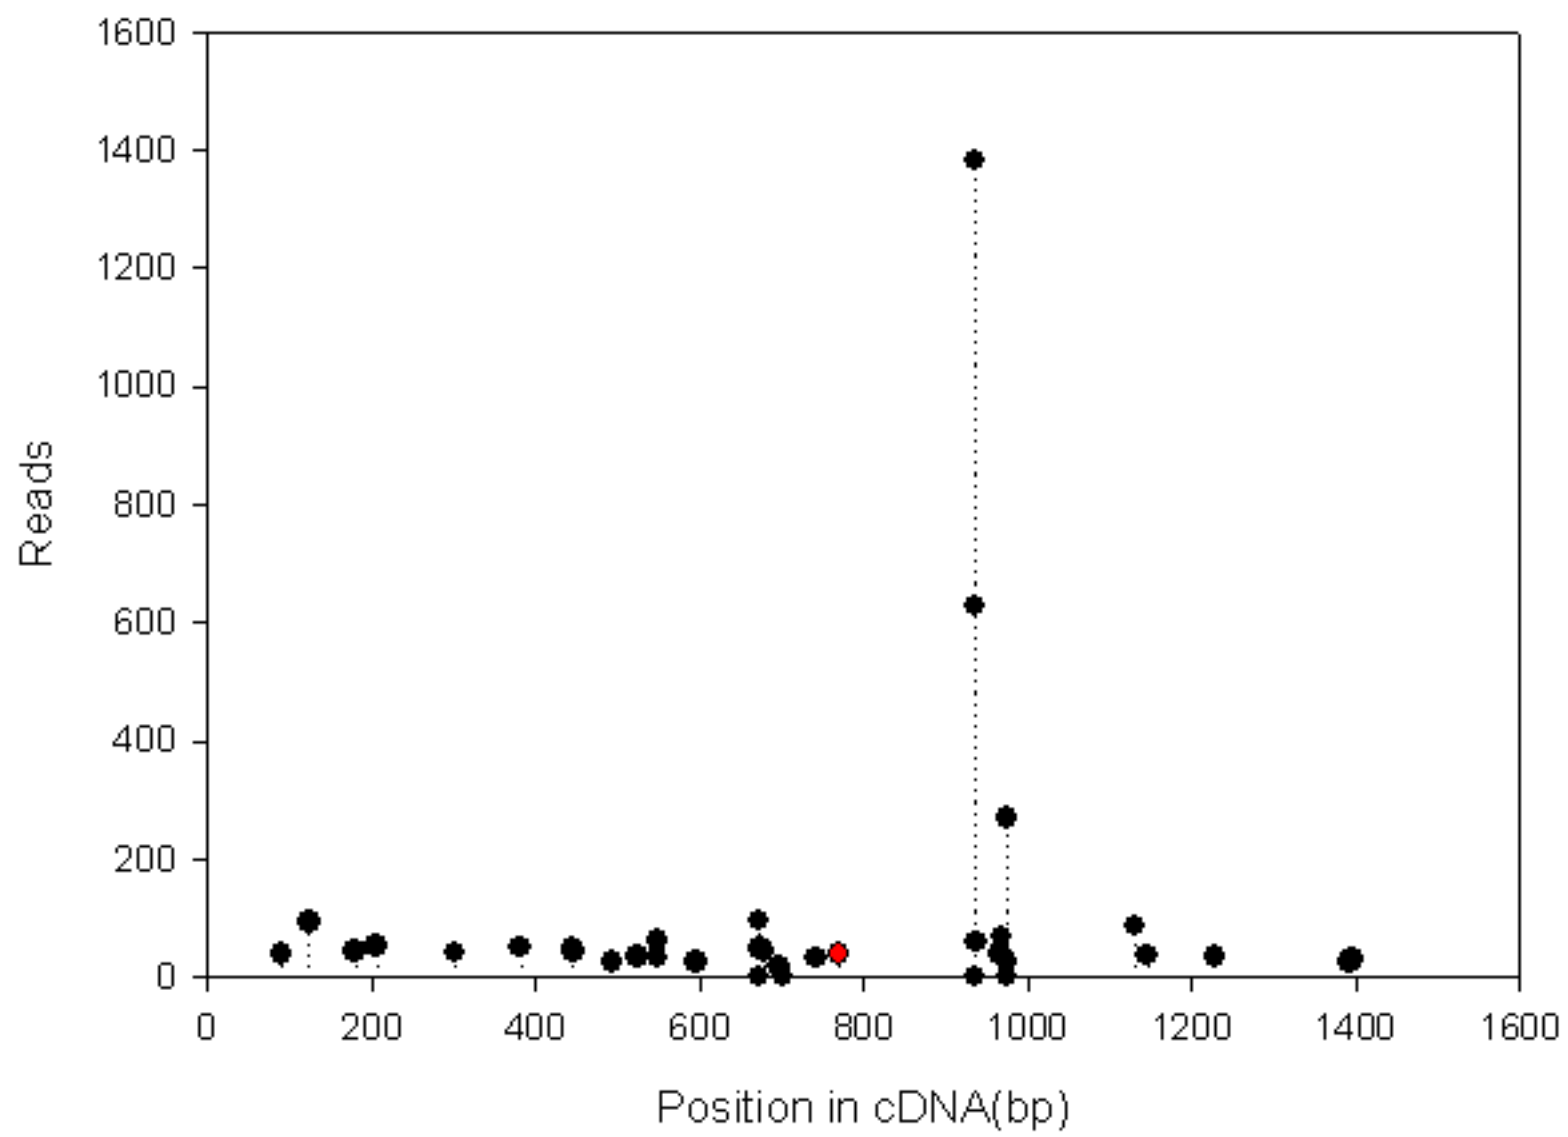

5' CCACUGGUUGCAAAGGUUUUUCAGCC 3'  
 : : : : : : : : : : : : : : : : : :  
 3' ---GACCUACGUCUCCAAAUAG---- 5'

Cs7g27400.1

Csi-miR162-3p.2

Csi-miR164, target=Cs5g10870.1 gene=Cs5g10870  
 Category:1  
 Score=3.5  
 Cleavage Site=1062

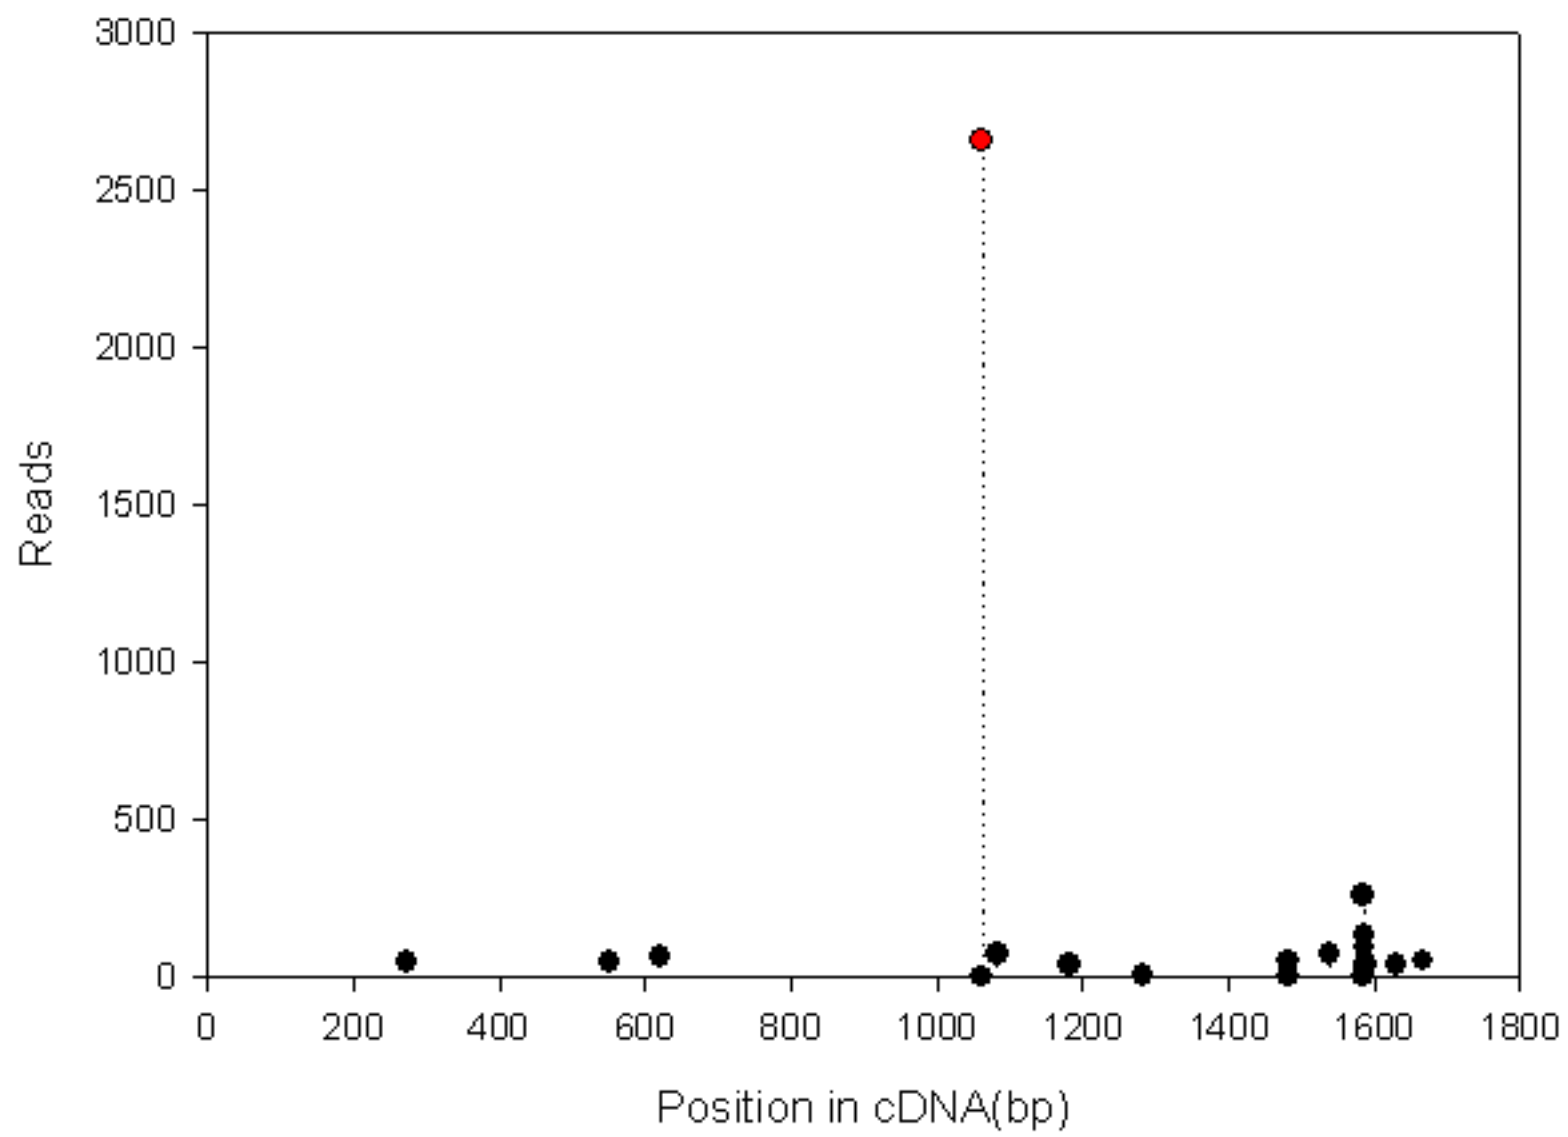

```

5' GCUUACGUGUCCUGCUUCUCCAAUUC 3'      Cs5g10870.1
   . : : : : . : : : : : : : : : :
3' -ACGUGCACGGGACGAAGAGGU---- 5'      Csi-miR164
  
```

Csi-miR164, target=Cs8g18140.1 gene=Cs8g18140  
 Category:3  
 Score=4.5  
 Cleavage Site=521

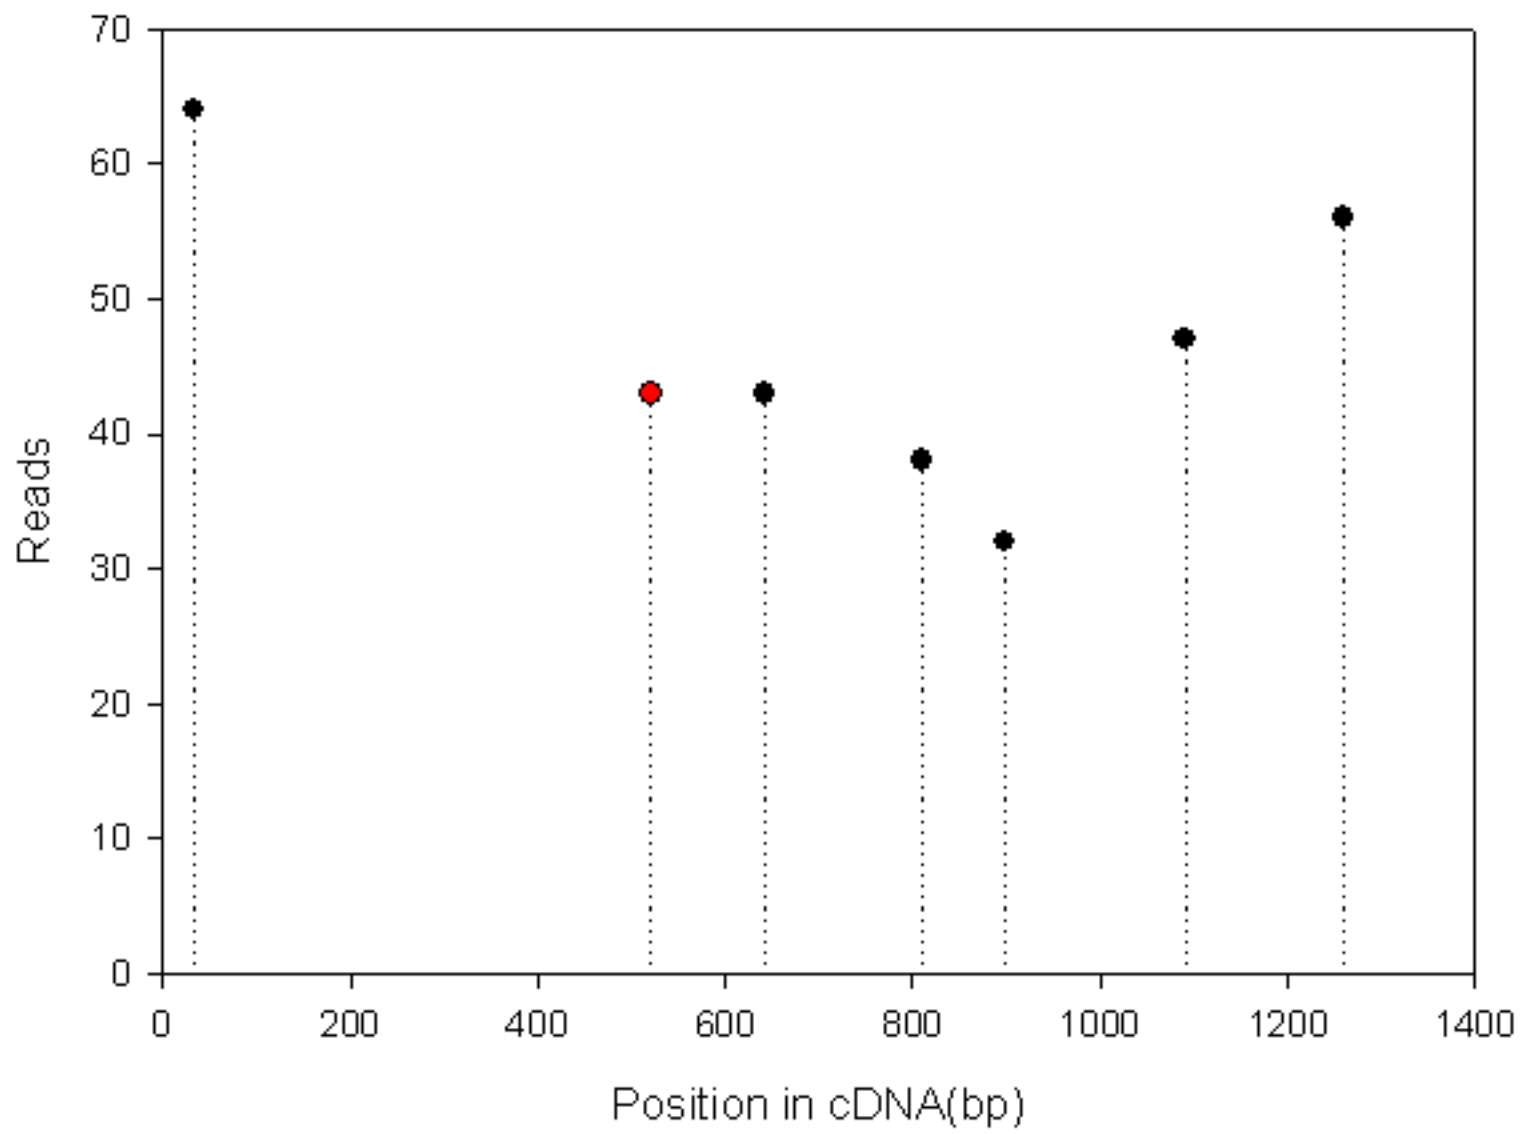

```

5' ACCUUGCAUGCCCUGCUUCUCCGAUU 3'      Cs8g18140.1
   ..: ::::::::::::::::::::.
3' --ACGUGCACGGGACGAAGAGGU--- 5'      Csi-miR164
  
```

Csi-miR166a.1, target=Cs8g16510.1 gene=Cs8g16510  
 Category:1  
 Score=4  
 Cleavage Site=1434

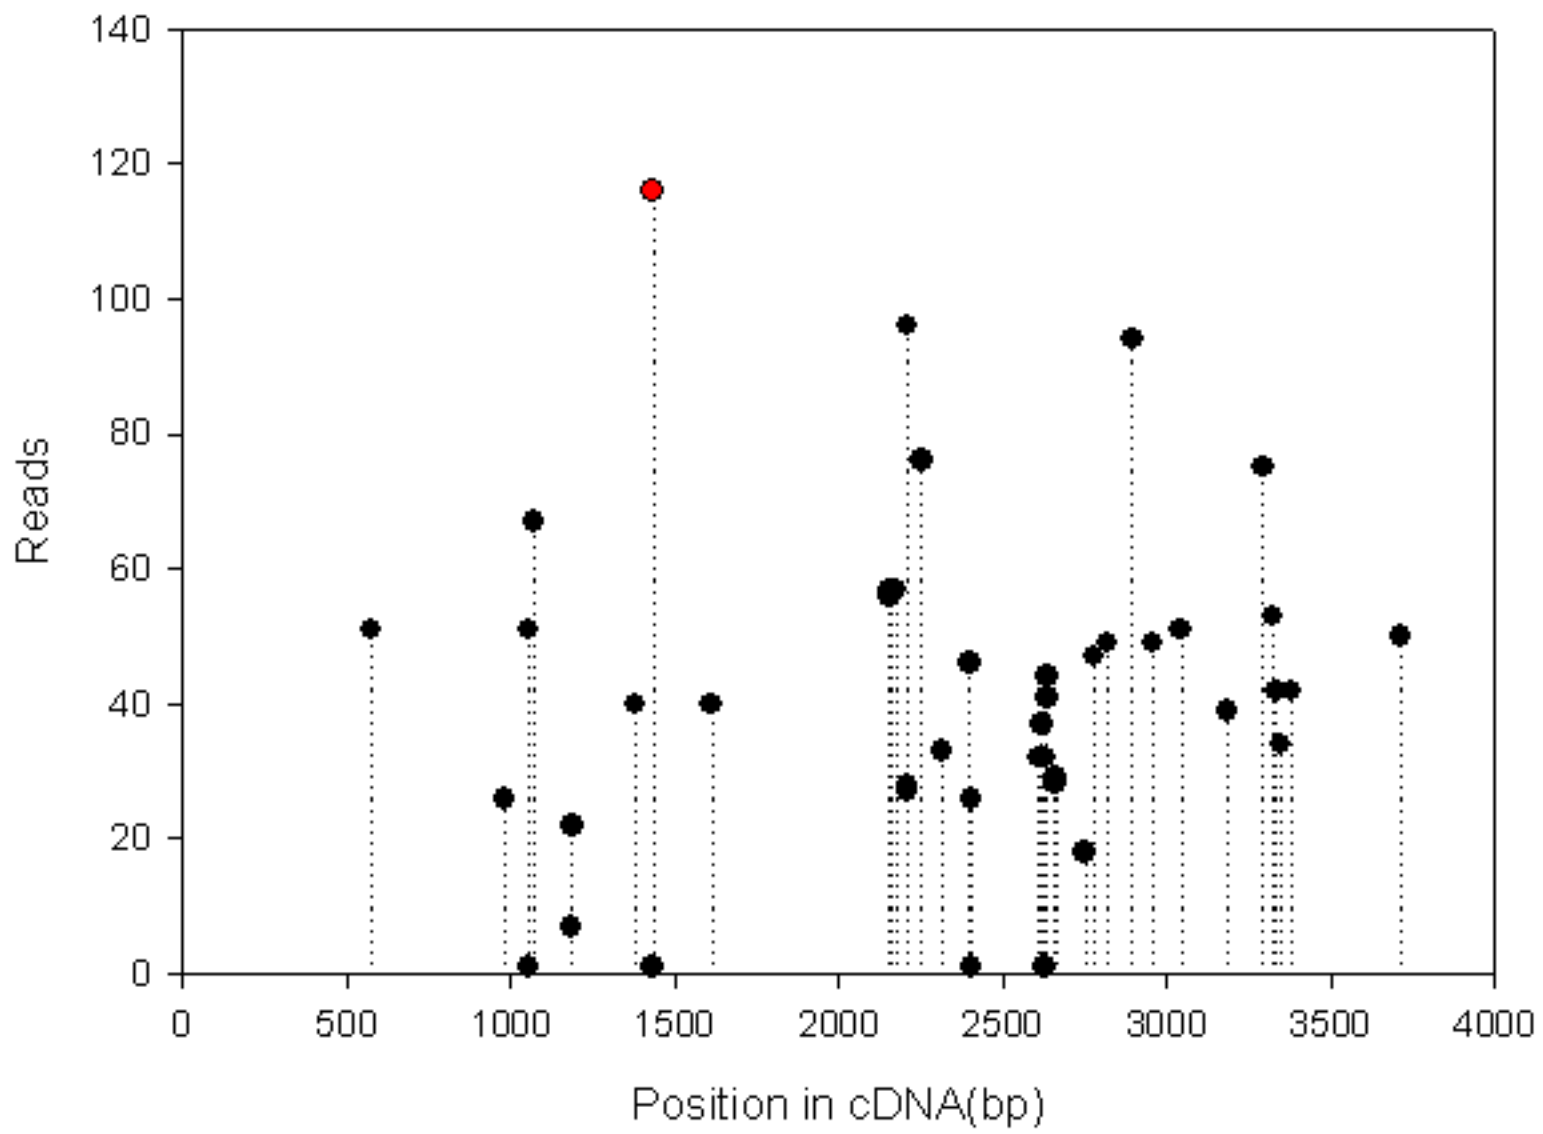

5' CCUGGGAUGAAGCCUGGUCCGGAUUC 3'

Cs8g16510.1

.....

3' CCCCUCUACUUCGGACCAGGCU---- 5'

Csi-miR166a.1

Csi-miR166a.2, target=Cs8g16510.1 gene=Cs8g16510  
 Category:1  
 Score=3  
 Cleavage Site=1434



5' CCUGGGAUGAAGCCUGGUCCGGAUUC 3'

Cs8g16510.1

.....

3' -CCCCUACUUCGGACCAGGCU---- 5'

Csi-miR166a.2

Csi-miR166b, target=Cs8g16510.1 gene=Cs8g16510  
 Category:1  
 Score=2  
 Cleavage Site=1434

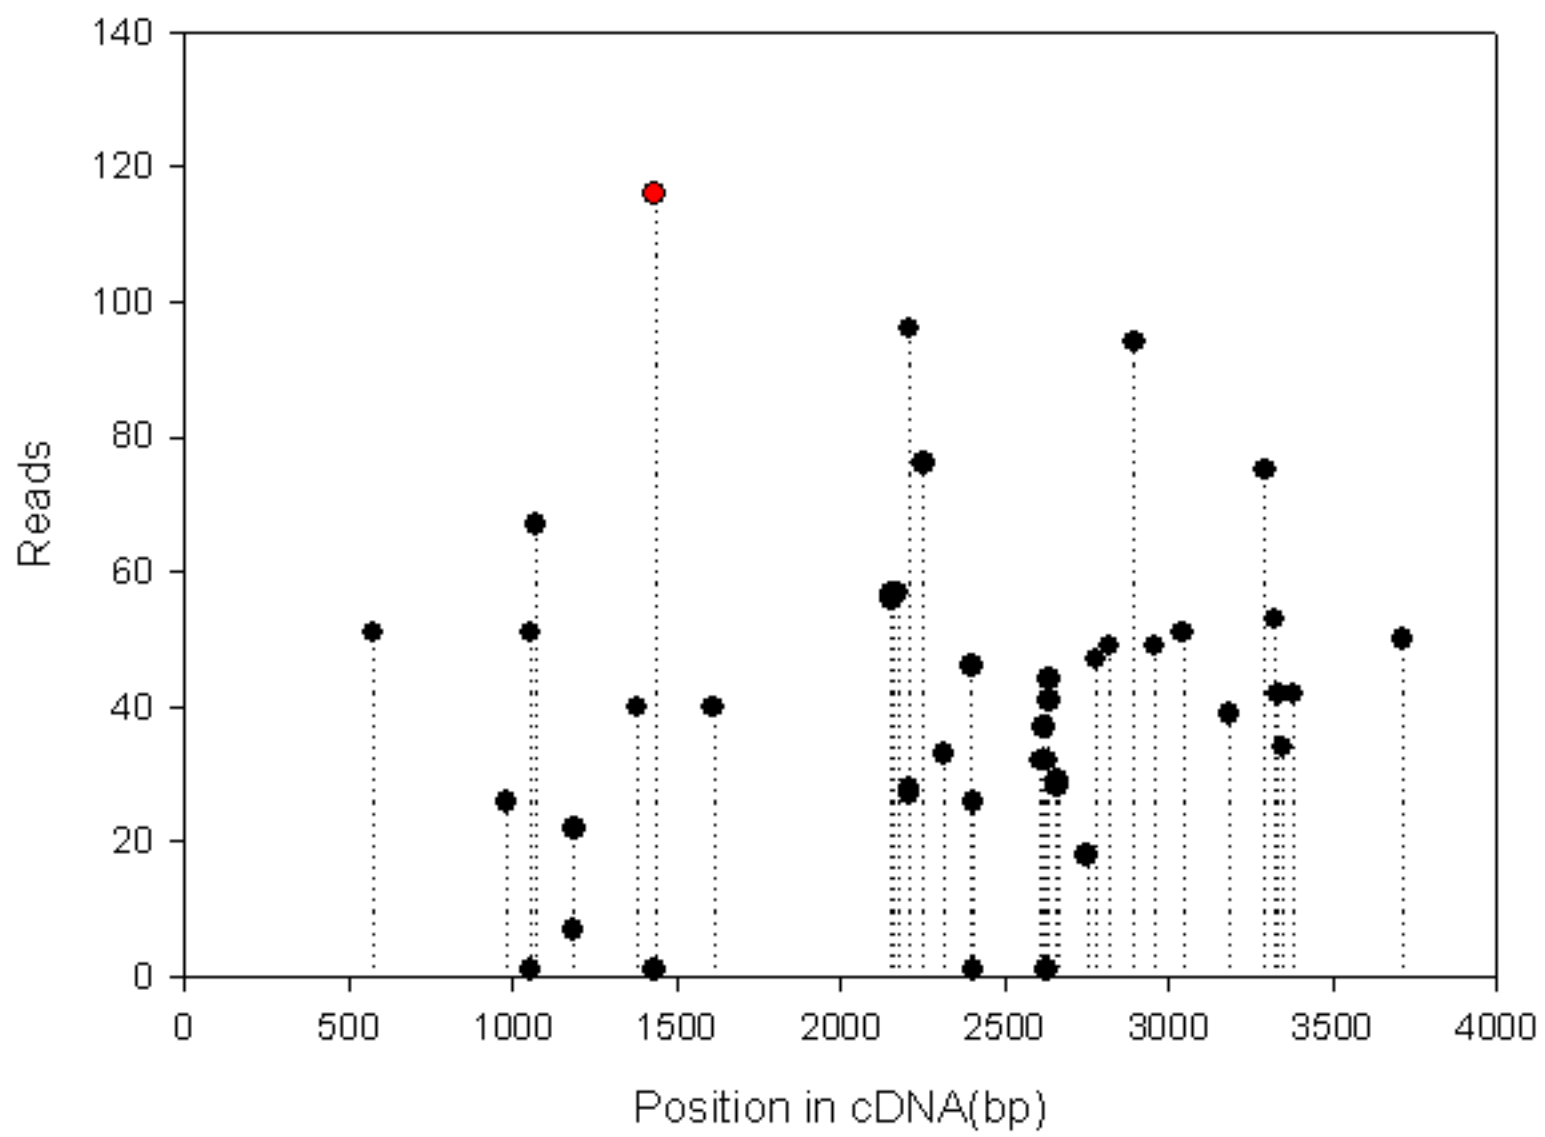

```

5' CCUGGGAUGAAGCCUGGUC CGGAUUC 3'      Cs8g16510.1
   : : : : : : : : : : : : : : : :
3' -GCCCUUACUUCGGACCAGGCU----- 5'      Csi-miR166b

```

Csi-miR166c.1, target=Cs8g16510.1 gene=Cs8g16510  
 Category:1  
 Score=1  
 Cleavage Site=1434



```

5' CCUGGGAUGAAGCCUGGUCCGGAUUC 3'      Cs8g16510.1
   ::::::::::::::::::::.
3' ---CCUUACUUCGGACCAGGCU---- 5'      Csi-miR166c.1

```



Csi-miR166c.2, target=Cs4g06030.1 gene=Cs4g06030  
 Category:2  
 Score=4.5  
 Cleavage Site=2041

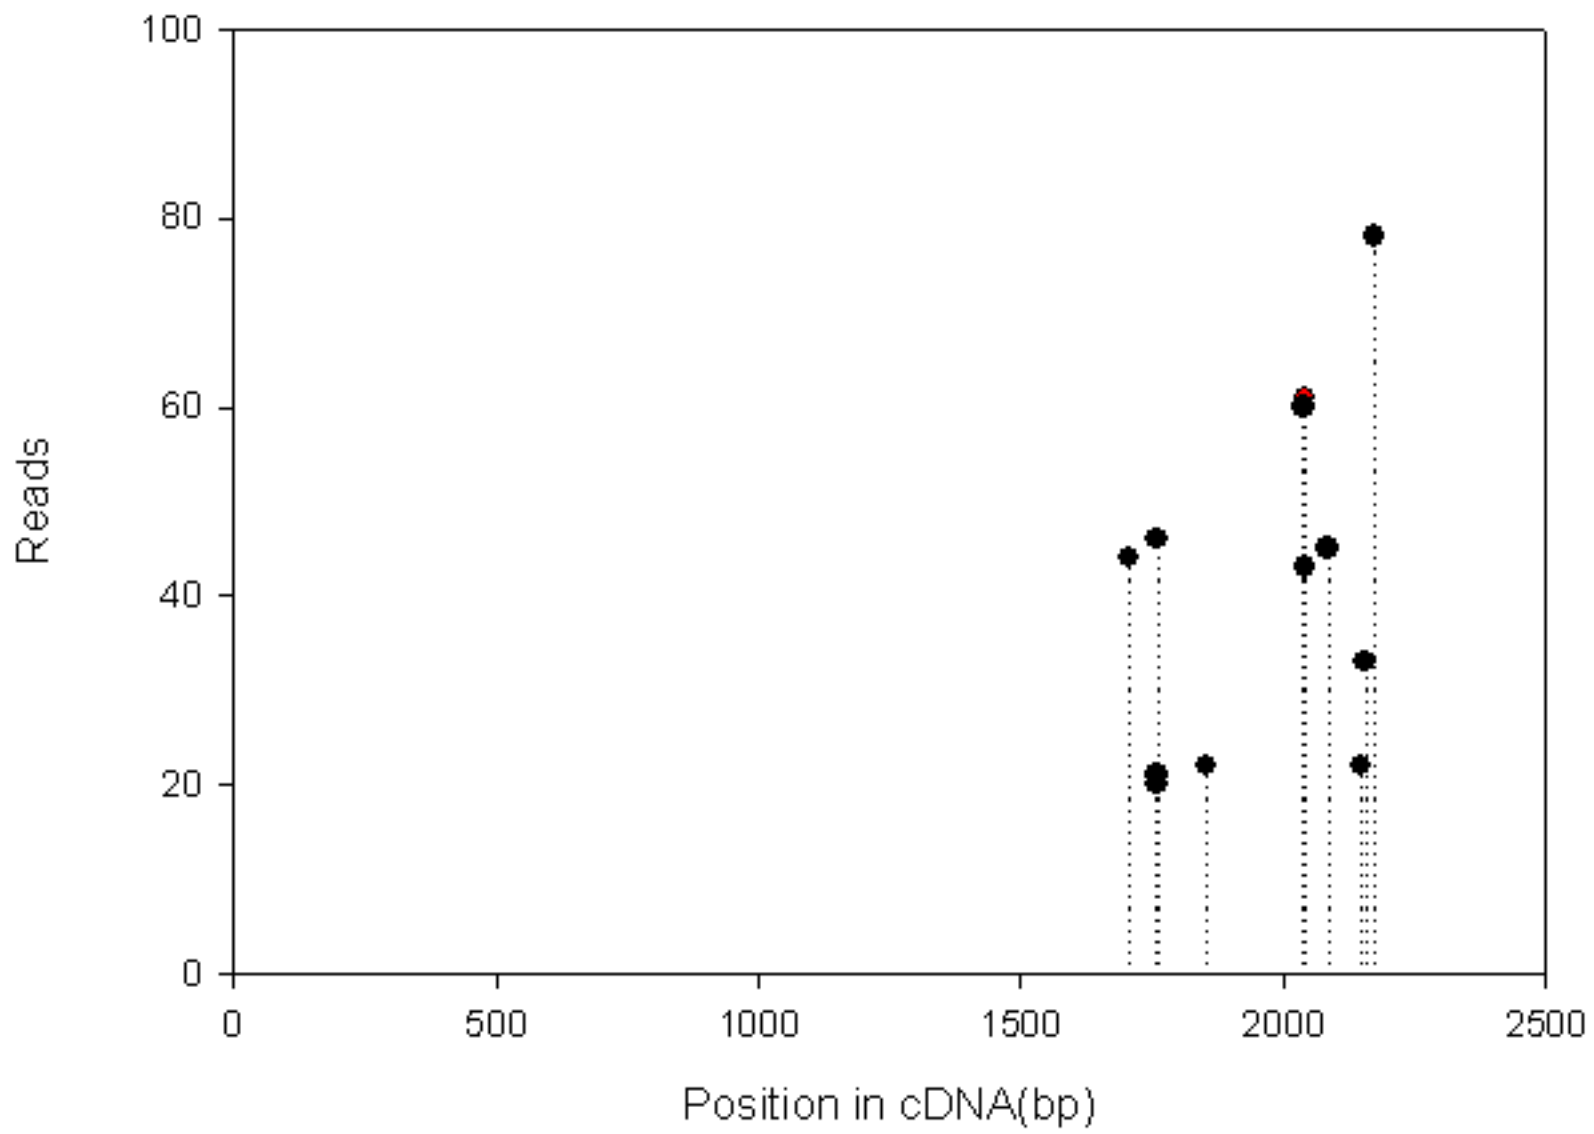

```

5' GCUAGGCUGAAU-AAGCCUGUUCUGGG 3'      Cs4g06030.1
      : : : : : : : : : : : : : : :
3' -----CUUACUUCGGACCAGGCU- 5'      Csi-miR166c.2
  
```

Csi-miR166c.2, target=Cs8g16510.1 gene=Cs8g16510  
 Category:1  
 Score=1  
 Cleavage Site=1434



5' CCUGGGAUGAAGCCUGGUCCGGAUUC 3'

Cs8g16510.1

: : : : : : : : : : : : : : : : : .

3' ----CUUACUUCGGACCAGGCU---- 5'

Csi-miR166c.2

Csi-miR166c.3, target=Cs8g16510.1 gene=Cs8g16510  
 Category:1  
 Score=2  
 Cleavage Site=1434



|    |                                   |    |               |
|----|-----------------------------------|----|---------------|
| 5' | CCUGGGAUGAAGCCUGGUCGGAUUC         | 3' | Cs8g16510.1   |
|    | : : : : : : : : : : : : : : : : . |    |               |
| 3' | --CCCUUACUUCGGACCAGGCU----        | 5' | Csi-miR166c.3 |

Csi-miR166c.4, target=Cs8g16510.1 gene=Cs8g16510  
 Category:1  
 Score=3.5  
 Cleavage Site=1434



```

5' CCUGGGAUGAAGCCUGGUCCGGAUUC 3'      Cs8g16510.1
   .....
3' --CCCUUACUUCGGACCAGGCUC--- 5'      Csi-miR166c.4
  
```

Csi-miR166c.5, target=Cs8g16510.1 gene=Cs8g16510  
 Category:1  
 Score=2.5  
 Cleavage Site=1434



```

5' CCUGGGAUGAAGCCUGGUCGGAUUC 3'      Cs8g16510.1
   .....
3' ---CCUUACUUCGGACCAGGCUC--- 5'      Csi-miR166c.5
  
```

Csi-miR166d.1, target=Cs8g16510.1 gene=Cs8g16510  
 Category:1  
 Score=4  
 Cleavage Site=1434



```

5' CCUGGGAUGAAGCCUGGUCCGGAUUC 3'      Cs8g16510.1
   ::::::::::::::::::::
3' UUCCCUUACUUCGGACCAGGCU----- 5'    Csi-miR166d.1
  
```

Csi-miR166d.2, target=Cs8g16510.1 gene=Cs8g16510  
 Category:1  
 Score=3  
 Cleavage Site=1434



```

5' CCUGGGAUGAAGCCUGGUCCGGAUUC 3'      Cs8g16510.1
   .....
3' -UCCCUUACUUCGGACCAGGCU---- 5'      Csi-miR166d.2
  
```

Csi-miR166g.1, target=Cs8g16510.1 gene=Cs8g16510  
 Category:1  
 Score=4.5  
 Cleavage Site=1434



```

5' CCUGGGAUGAAGCCUGGUCCGGAUUC 3'      Cs8g16510.1
   : : : : : : : : : : : : : : : :
3' ---CCUACUUCGGACCAGGCUCU-- 5'      Csi-miR166g.1
  
```



Csi-miR166i, target=Cs8g16510.1 gene=Cs8g16510  
 Category:1  
 Score=2.5  
 Cleavage Site=1434



```

5' CCUGGGAUGAAGCCUGGUCGGAUUC 3'      Cs8g16510.1
   ::::::::::::::::::::
3' --CCCUUACUUCGGACCAGGCUU--- 5'      Csi-miR166i

```

Csi-miR166j.1, target=Cs8g16510.1 gene=Cs8g16510  
 Category:1  
 Score=4  
 Cleavage Site=1434



5' CCUGGGAUGAAGCCUGGUCGGAUUC 3'  
 ::::::::::::::::::::.  
 3' -CUCCUACUUCGGACCAGGUU---- 5'

Cs8g16510.1  
 Csi-miR166j.1

Csi-miR166j.3, target=Cs4g04520.1 gene=Cs4g04520  
 Category:3  
 Score=4.5  
 Cleavage Site=1936

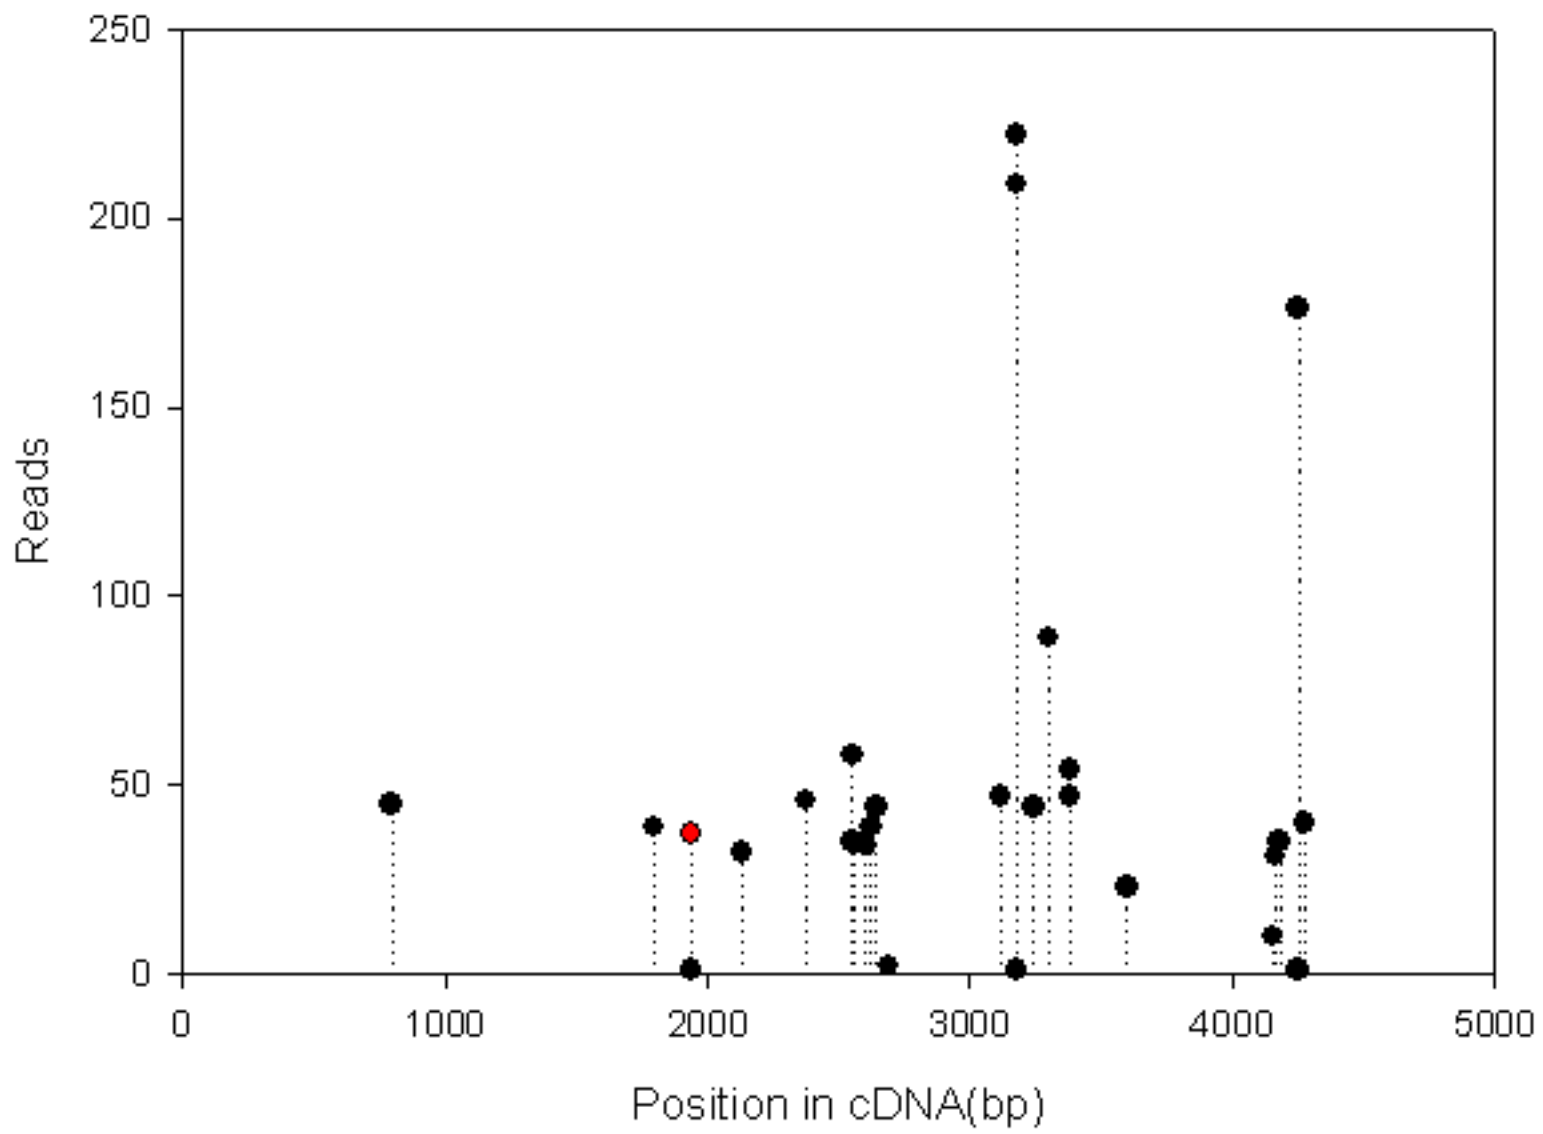

5' UCCUGGACU-AAGCUUGGUCCAGUGGA 3'  
 :::: : ::::: ::::: :::::  
 3' --CACCUUACUUCGGACCAGGUU---- 5'

Cs4g04520.1

Csi-miR166j.3

Csi-miR166j.3, target=Cs8g16510.1 gene=Cs8g16510  
 Category:1  
 Score=3  
 Cleavage Site=1434



```

5' CCUGGGAUGAAGCCUGGUCGGAUUC 3'      Cs8g16510.1
   ::::::::::::::::::::
3' -CACCUUACUUCGGACCAGGUU---- 5'      Csi-miR166j.3
  
```

Csi-miR167a.1, target=Cs2g15130.1 gene=Cs2g15130  
 Category:2  
 Score=5  
 Cleavage Site=3444

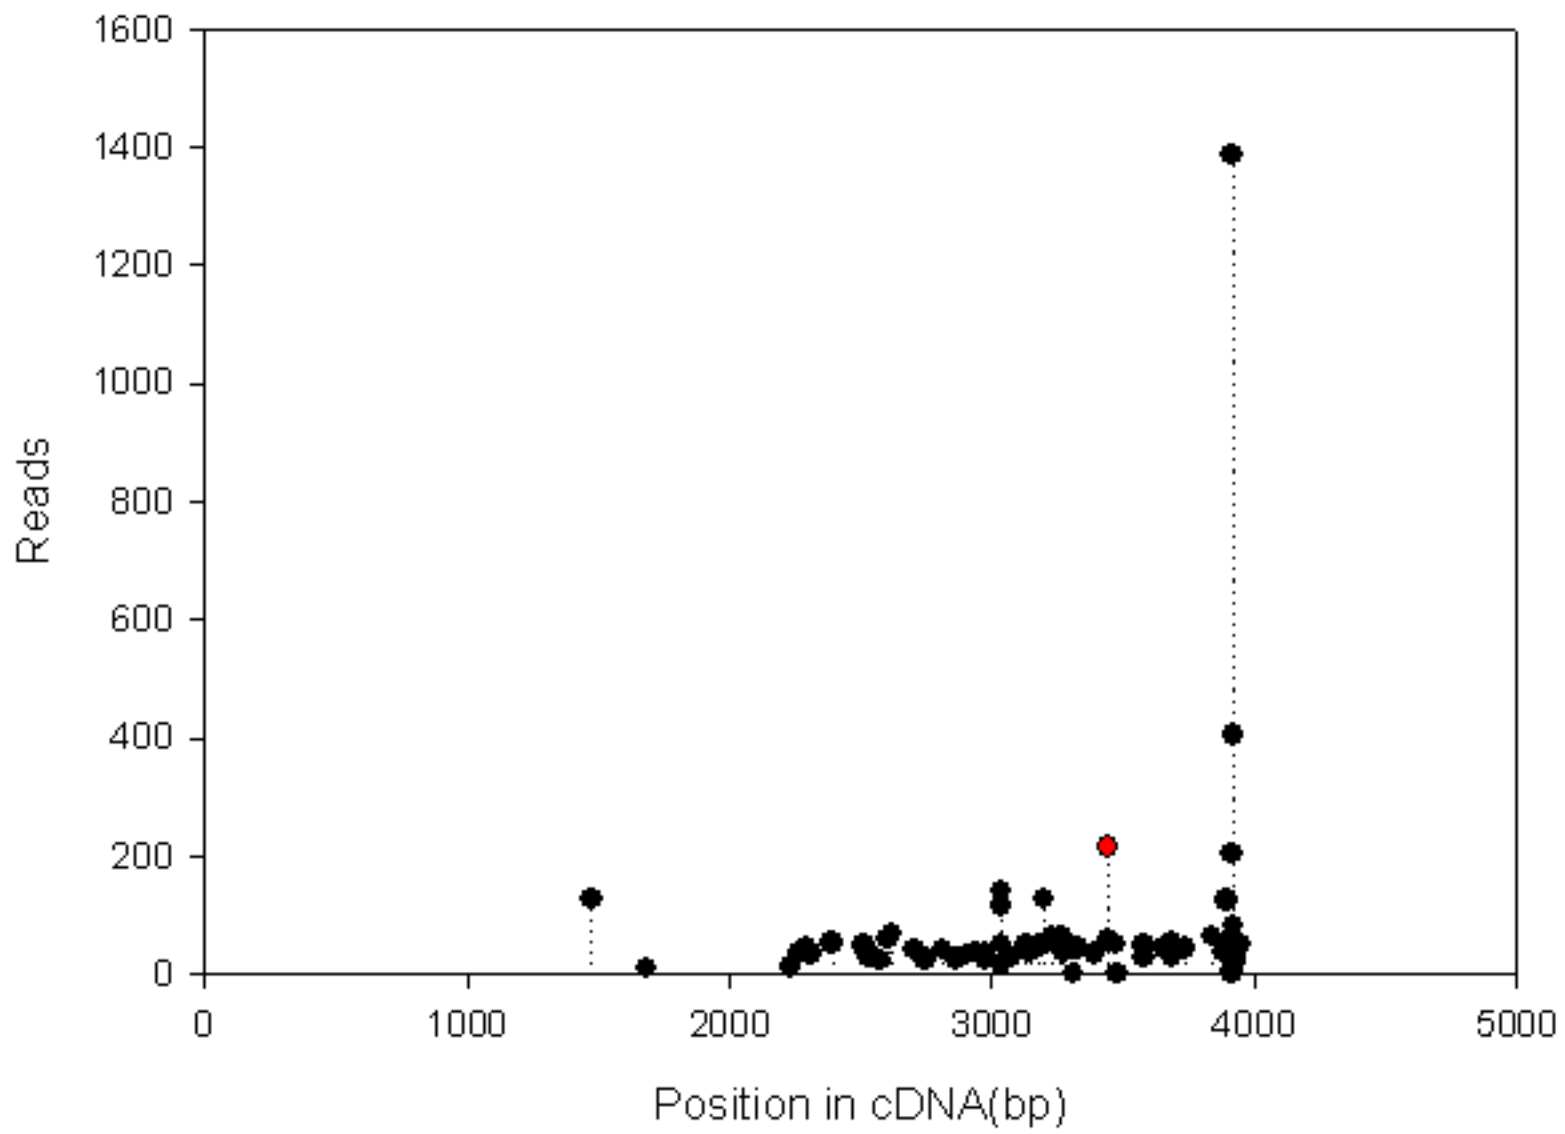

```

5' AGAGAUCAGGCUGGCAGCUUGUAUUU 3'      Cs2g15130.1
   : : : : : : : : : : : : : : : : :
3' -AUCUAGUACGACCGUCGAA-GU--- 5'      Csi-miR167a.1
  
```

Csi-miR167a.1, target=Cs8g08320.1 gene=Cs8g08320  
 Category:3  
 Score=4.5  
 Cleavage Site=585

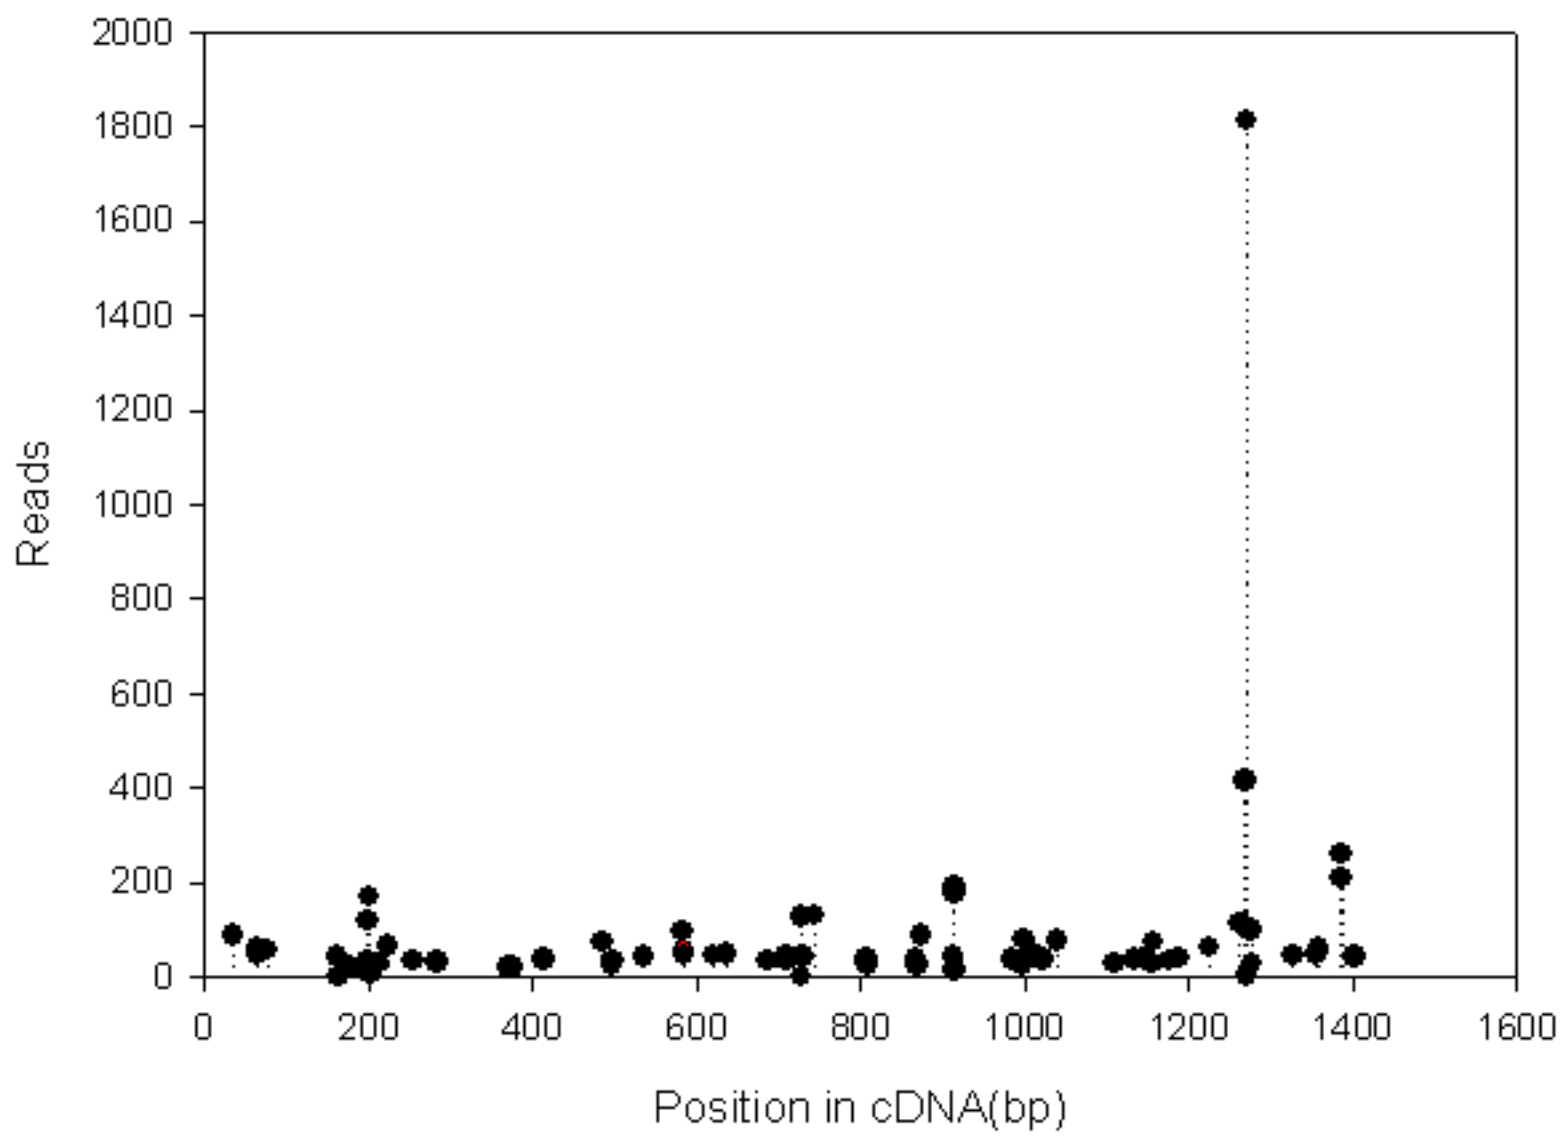

```

5' UCAUGC GGAUCAUGCUGG-AGUUUCAG 3'      Cs8g08320.1
      . . . . .
3' -----AUCUAGUACGACCGUCGAAGU- 5'      Csi-miR167a.1
  
```

Csi-miR167b.1, target=Cs2g09440.1 gene=Cs2g09440  
 Category:3  
 Score=4  
 Cleavage Site=3259

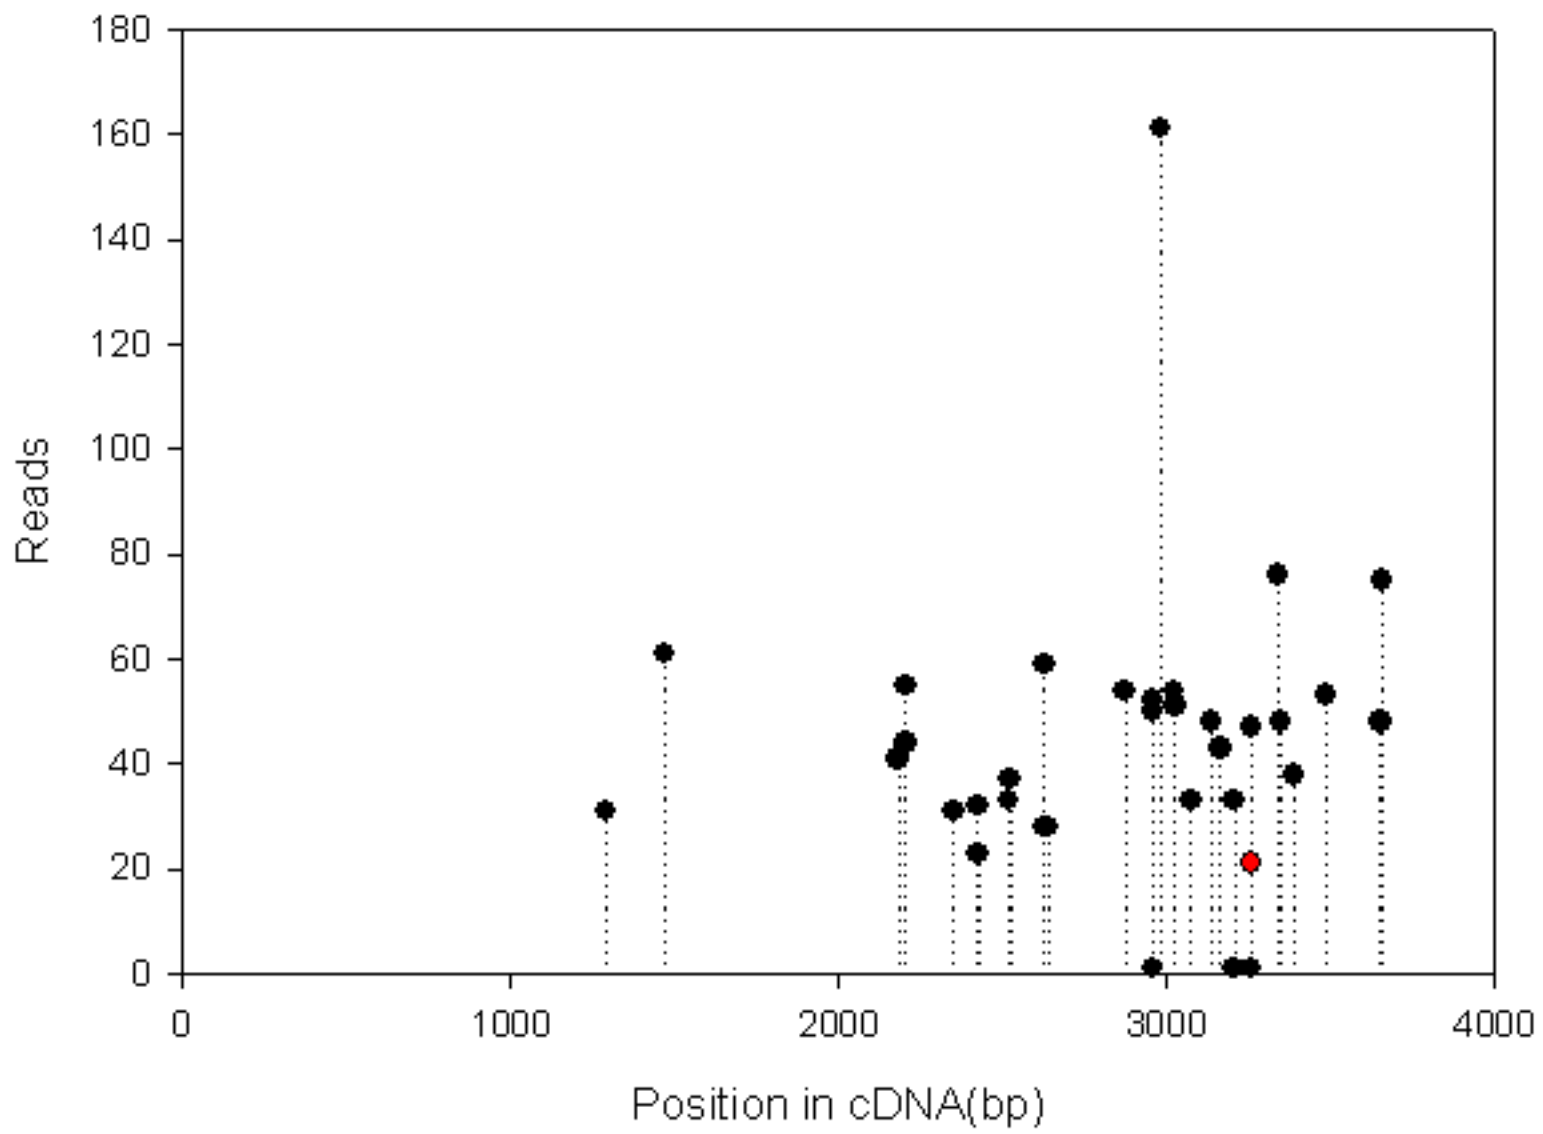

```

5' AGAUCAGGCUGGCAGCUUGUAUUCGU 3'      Cs2g09440.1
  ::::: ::::::::::: ::
3' UCUAGUACGACCGUCGAA-GU----- 5'      Csi-miR167b.1

```

Csi-miR167b.1, target=Cs2g15130.1 gene=Cs2g15130  
 Category:2  
 Score=4  
 Cleavage Site=3444



```

5' AGAGAUCAGGCUGGCAGCUUGUAUUU 3'      Cs2g15130.1
   ::::: ::::::::::: .:
3' --UCUAGUACGACCGUCGAA-GU--- 5'      Csi-miR167b.1
  
```



Csi-miR167b.1, target=Cs8g08320.1 gene=Cs8g08320

Category:3

Score=3.5

Cleavage Site=585

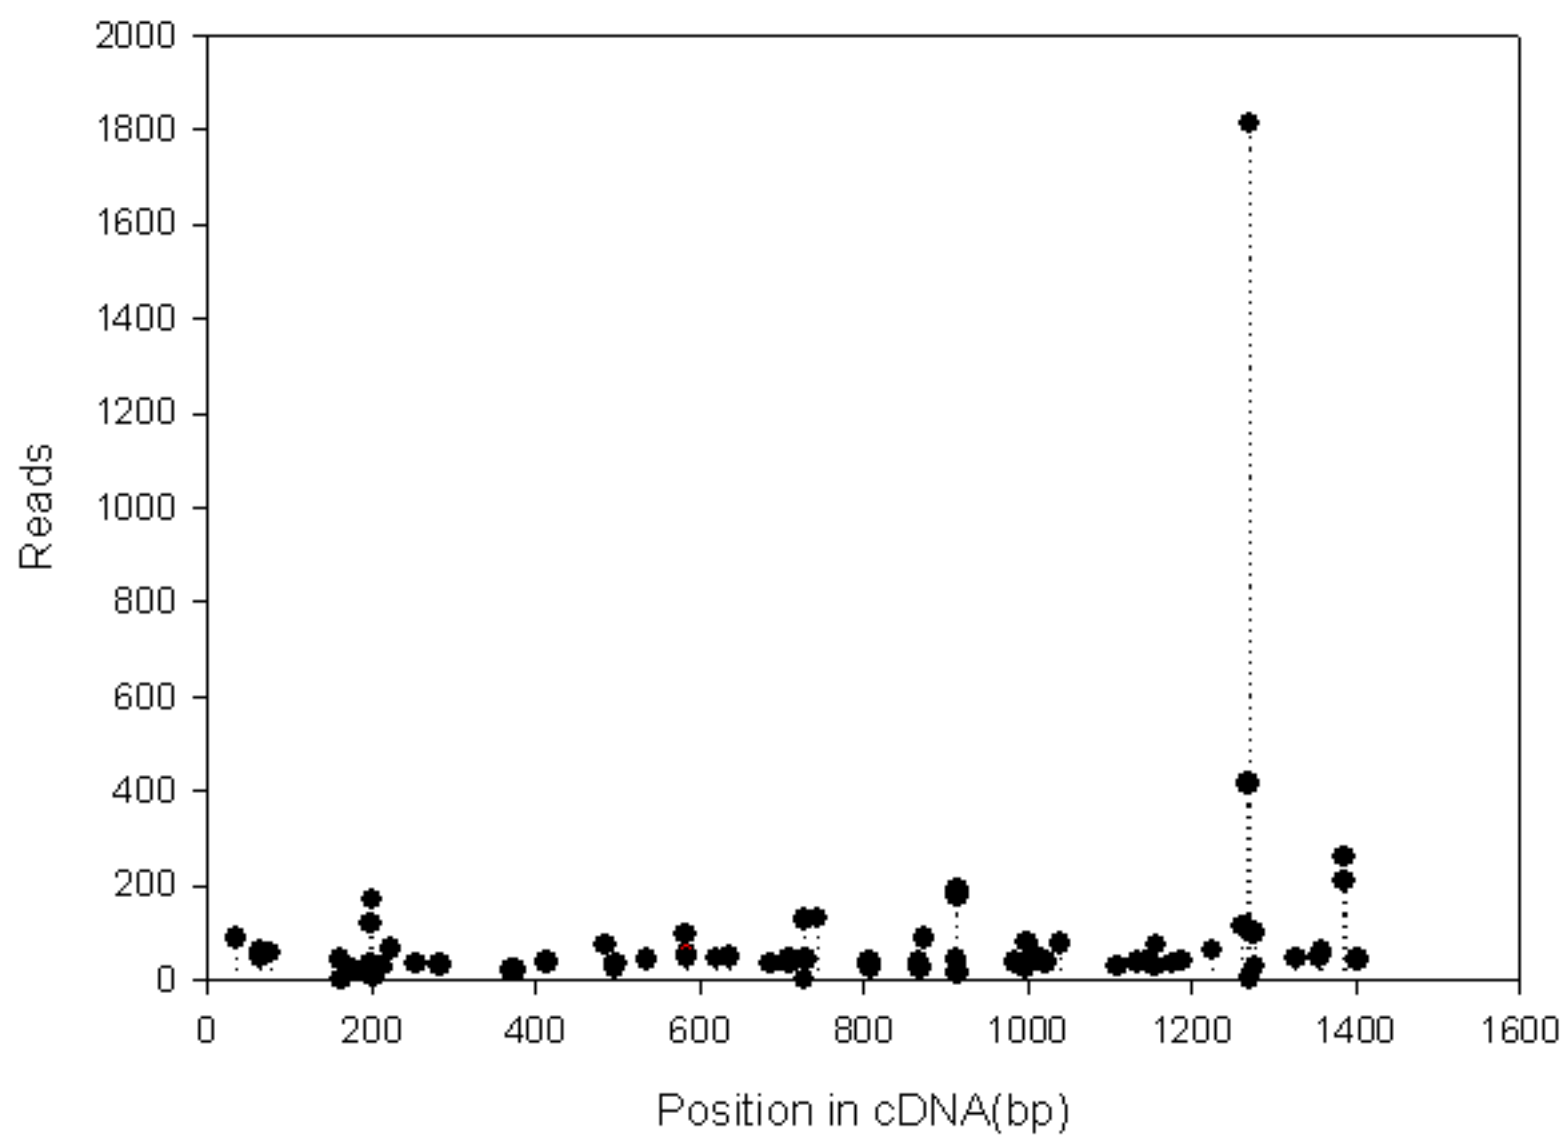

5' UCAUGC~~CGGAUCAUGCUGG~~-AGUUUCAG 3'

Cs8g08320.1

.: .: .: .: .: .: .: .: .: .: .: .: .: .: .: .:

3' -----UCUAGUACGACCGUCGAAGU- 5'

Csi-miR167b.1

Csi-miR167b.3, target=Cs2g15130.1 gene=Cs2g15130  
 Category:2  
 Score=3.5  
 Cleavage Site=3444



```

5' AGAGAUCAAGGCUGGCAGCUUGUAUUU 3'      Cs2g15130.1
   . . . . . : . . . . .
3' AUUCUAGUACGACCGUCGAA----- 5'      Csi-miR167b.3
  
```

Csi-miR167b.3, target=Cs8g07440.1 gene=Cs8g07440  
 Category:3  
 Score=5  
 Cleavage Site=1606

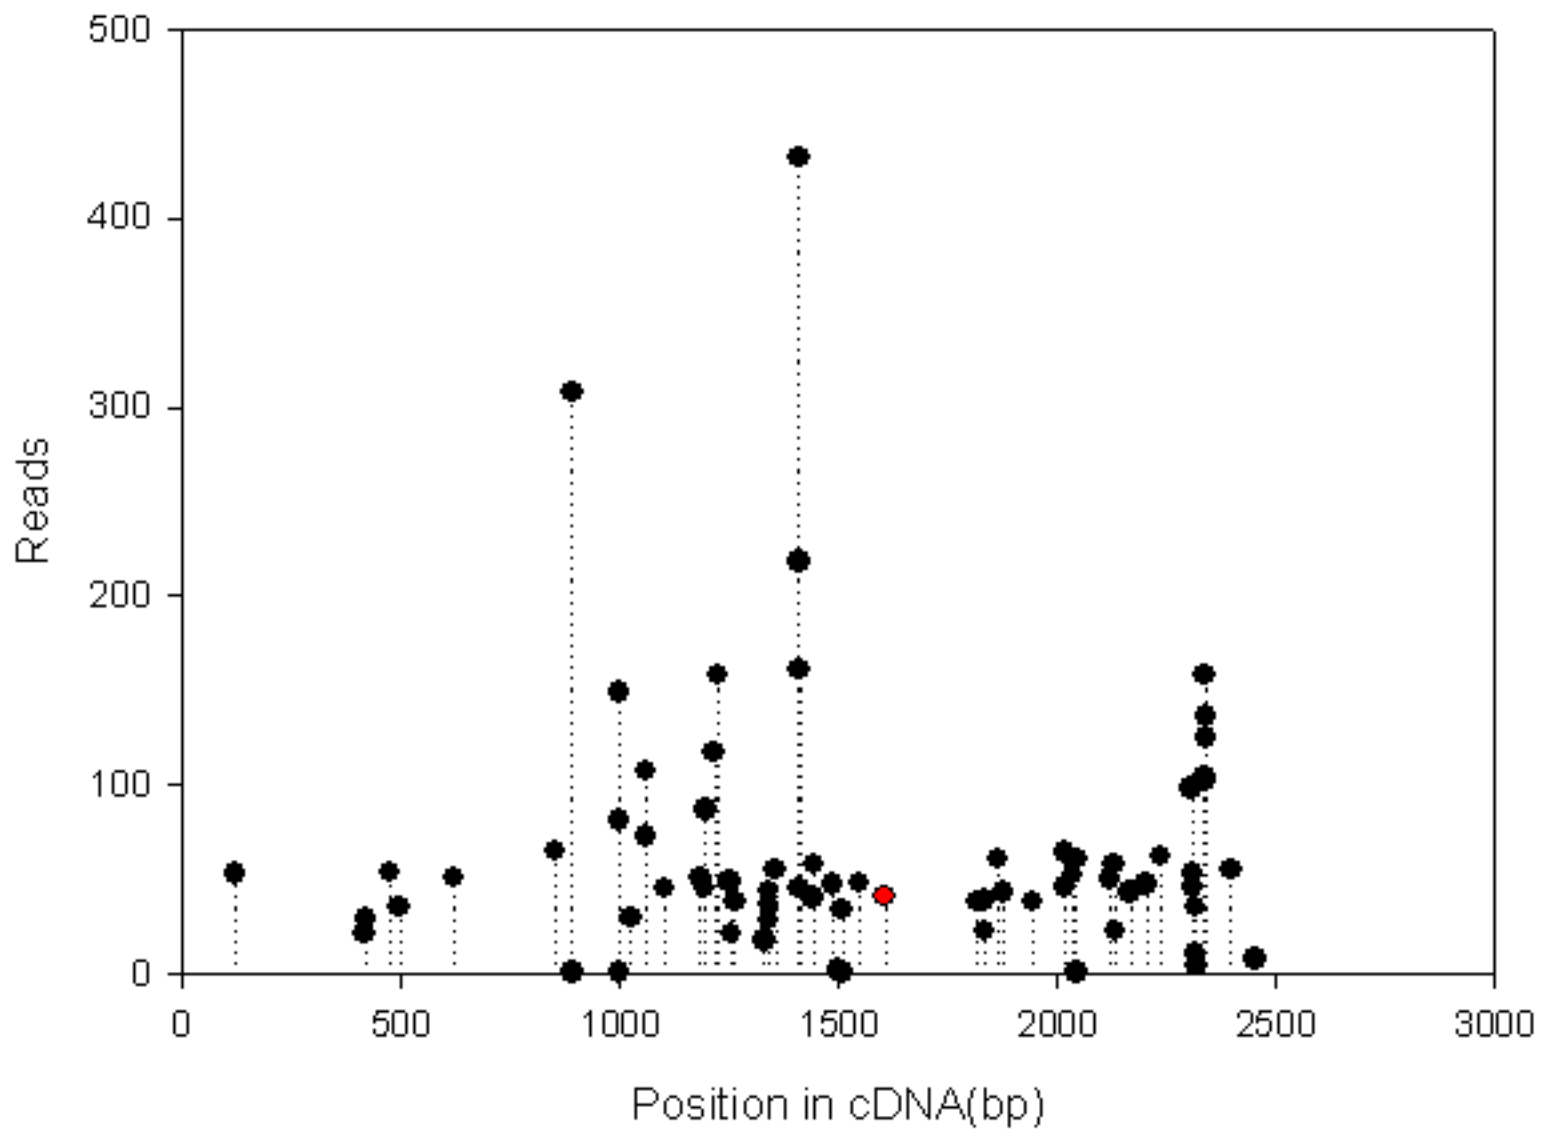

```

5' GGAAAACAAGCU-AUGCUGGAAGCUUC 3' Cs8g07440.1
   ::: : ::::: : :::::
3' -----AUUCUAGUACGACCGUCGAA- 5' Csi-miR167b.3
  
```

Csi-miR167b.4, target=Cs2g15130.1 gene=Cs2g15130  
 Category:2  
 Score=4.5  
 Cleavage Site=3444



```

5' AGAGAUCAGGCUGGCAGCUUGUAUUU 3'      Cs2g15130.1
   . . . . . . . . . . . . . . . . . .
3' -UUCUAGUACGACCGUCGAA-GU--- 5'      Csi-miR167b.4
  
```

Csi-miR167b.4, target=Cs8g08320.1 gene=Cs8g08320  
 Category:3  
 Score=4.5  
 Cleavage Site=585

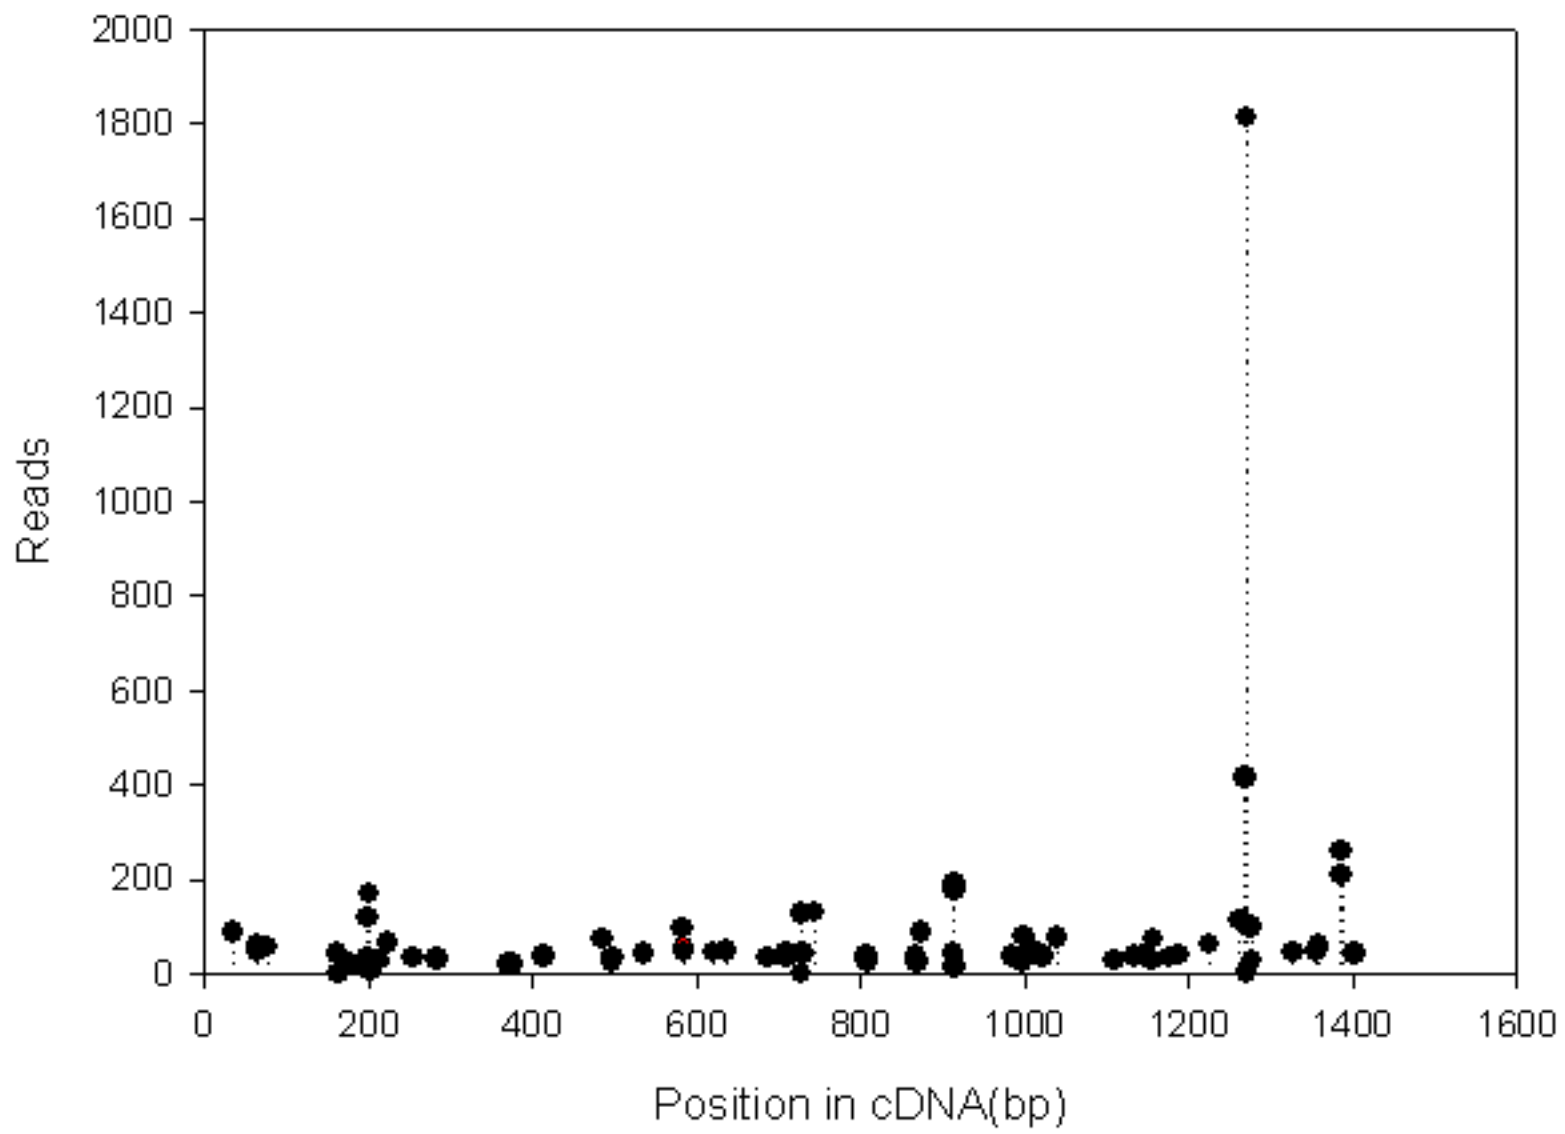

```

5' UCAUGCGGAUCAUGCUGG-AGUUUCAG 3'      Cs8g08320.1
      . . . . .
3' -----UUCUAGUACGACCGUCGAAGU- 5'      Csi-miR167b.4
  
```

Csi-miR167d.1, target=Cs8g08320.1 gene=Cs8g08320  
 Category:3  
 Score=4.5  
 Cleavage Site=585

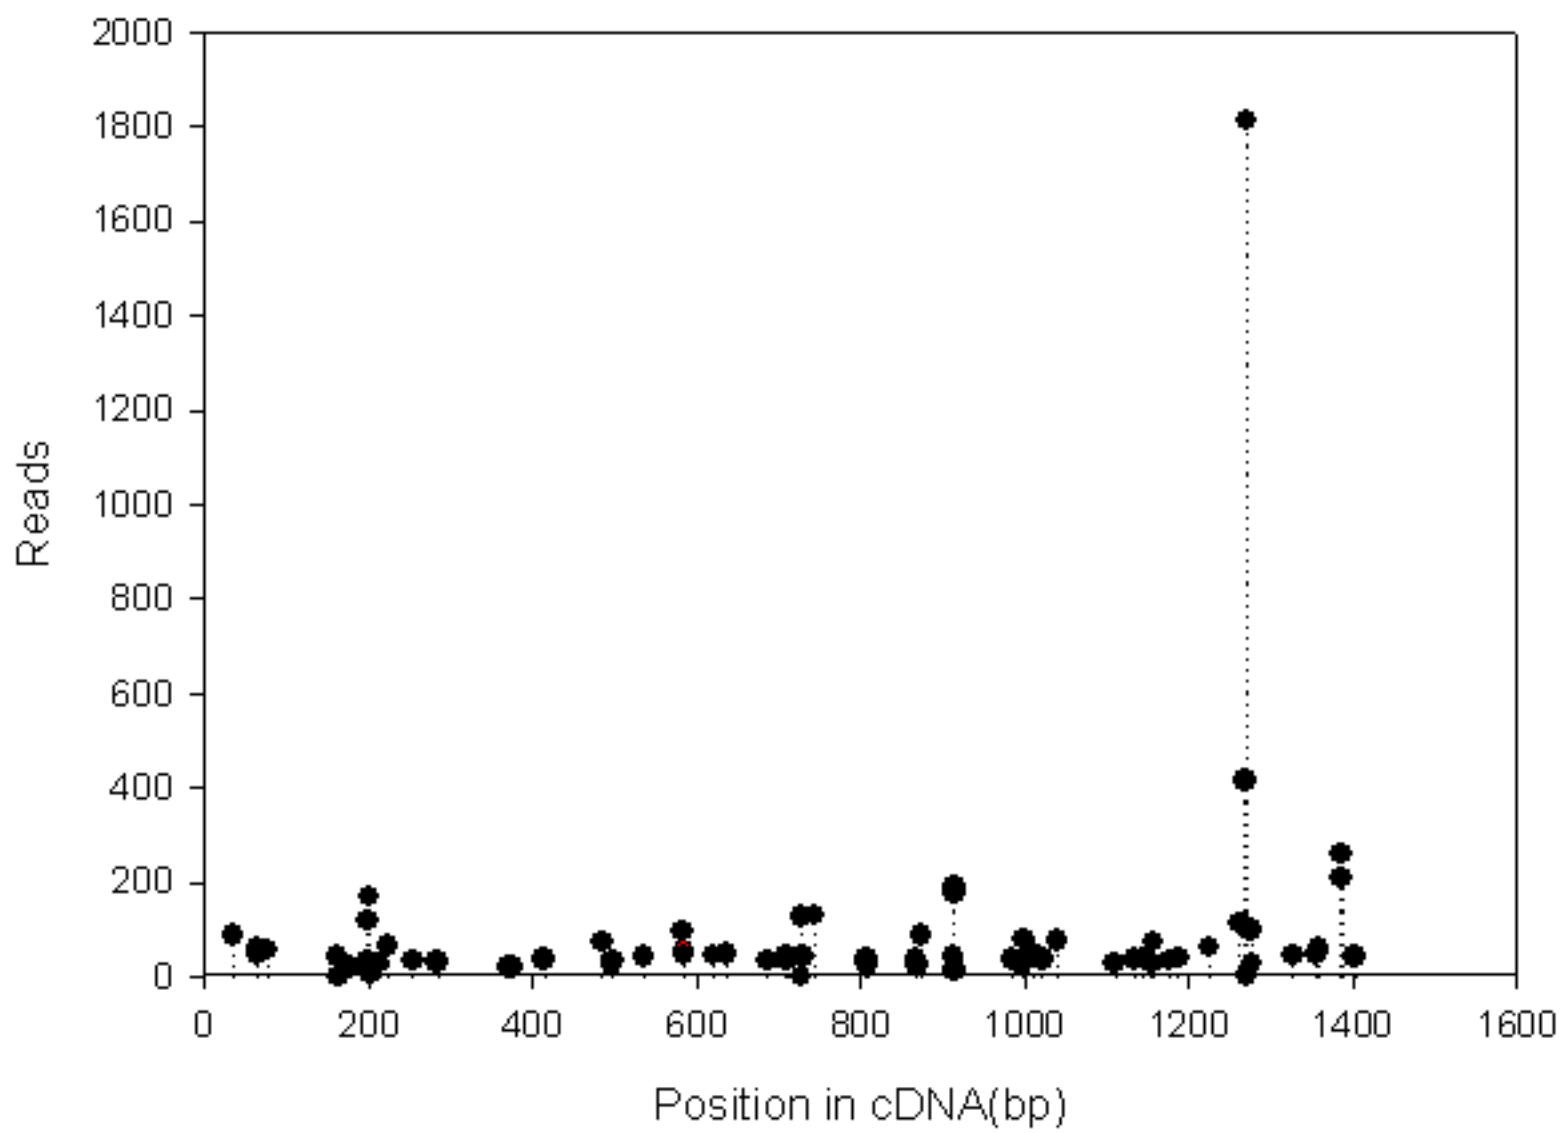

```

5' UCAUGC GGAUCAUGCUGG-AGUUUCAG 3'      Cs8g08320.1
      . . . . .
3' ----AGUCUAGUACGACCGUCGAAGU- 5'      Csi-miR167d.1
  
```

Csi-miR167d.2, target=Cs2g15130.1 gene=Cs2g15130  
 Category:2  
 Score=5  
 Cleavage Site=3444



```

5' AGAGAUCAGGCUGGCAGCUUGUAUUU 3'      Cs2g15130.1
   ::::: ::::::::::::::: ..
3' -GUCUAGUACGACCGUCGAA-GU--- 5'      Csi-miR167d.2
  
```

Csi-miR167d.2, target=Cs8g08320.1 gene=Cs8g08320  
 Category:3  
 Score=3.5  
 Cleavage Site=585



```

5' UCAUGC GGAUCAUGCUGG-AGUUUCAG 3'      Cs8g08320.1
   :.:.:.:.:.:.:.:.:.:.:.:.:.:.:.:.:.
3' -----GUCUAGUACGACCGUCGAAGU- 5'      Csi-miR167d.2
  
```



Csi-miR168a, target=Cs5g05510.1 gene=Cs5g05510  
 Category:1  
 Score=5  
 Cleavage Site=1971

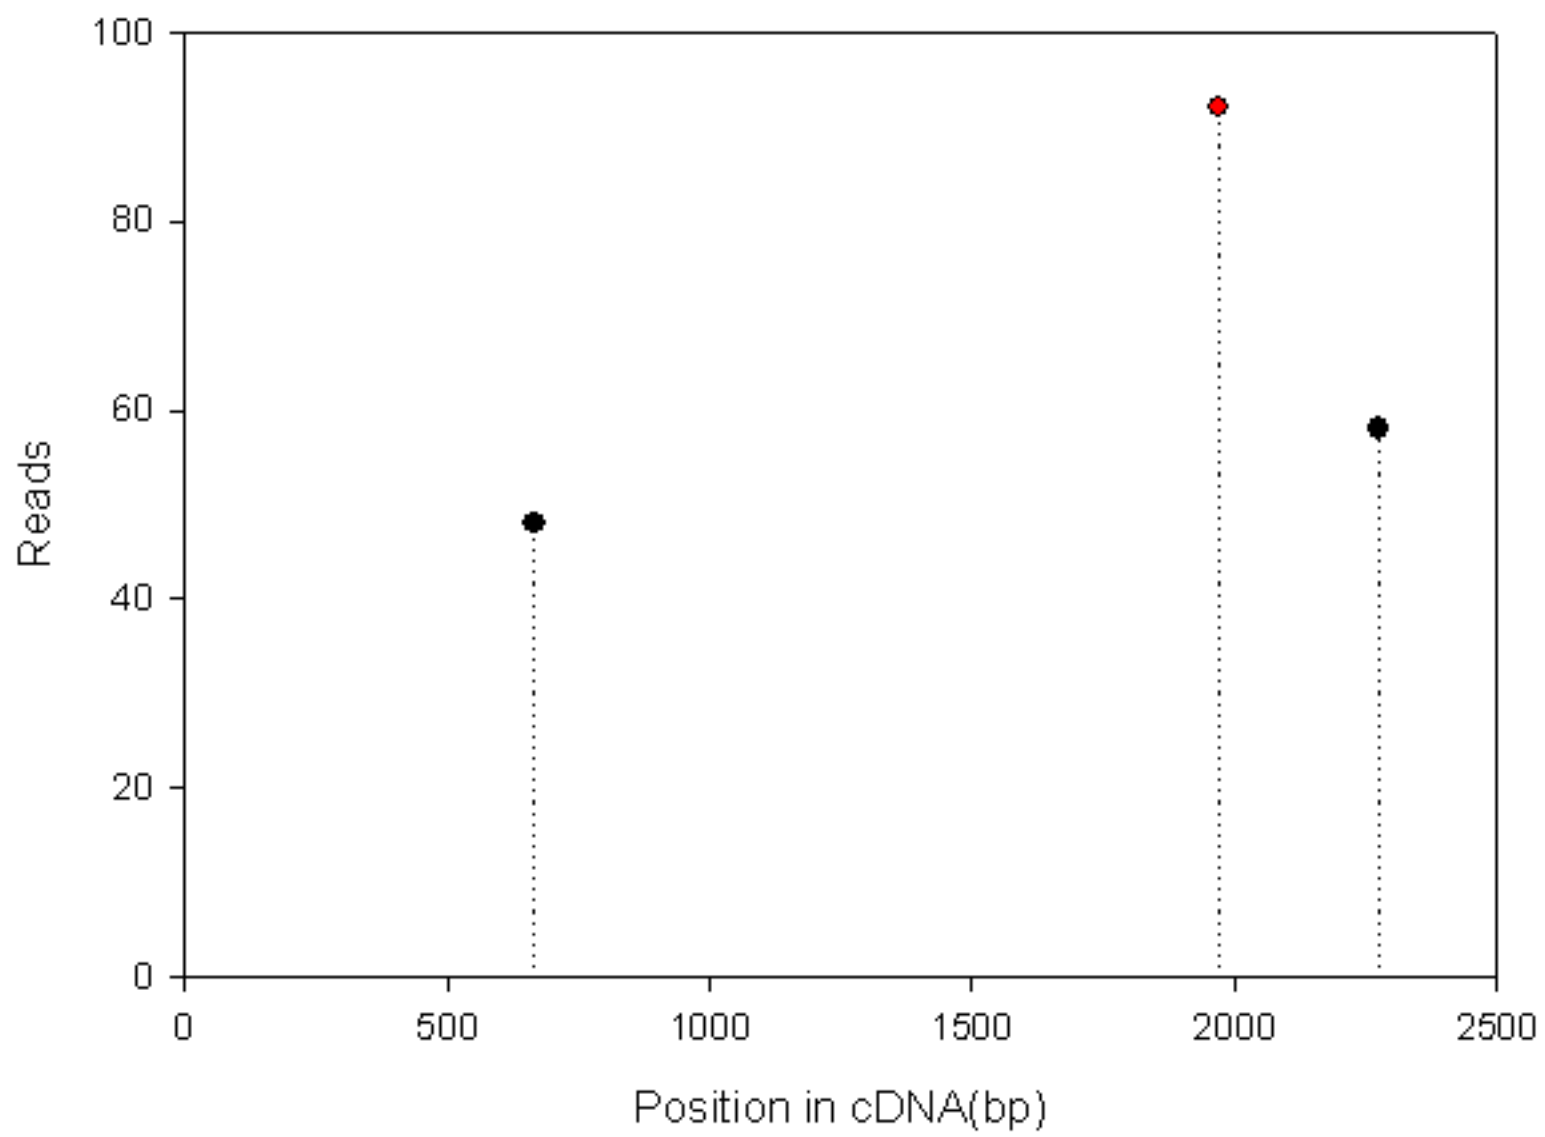

```

5' AUUCCCUCCCUGCACUAAACGAUAUA 3'      Cs5g05510.1
   : : : : : : : : : : : : : : : : :
3' -AAGGGCUGGACGUGGUUCGCU----- 5'    Csi-miR168a
  
```

Csi-miR168a, target=Cs5g16710.1 gene=Cs5g16710  
 Category:2  
 Score=5  
 Cleavage Site=797

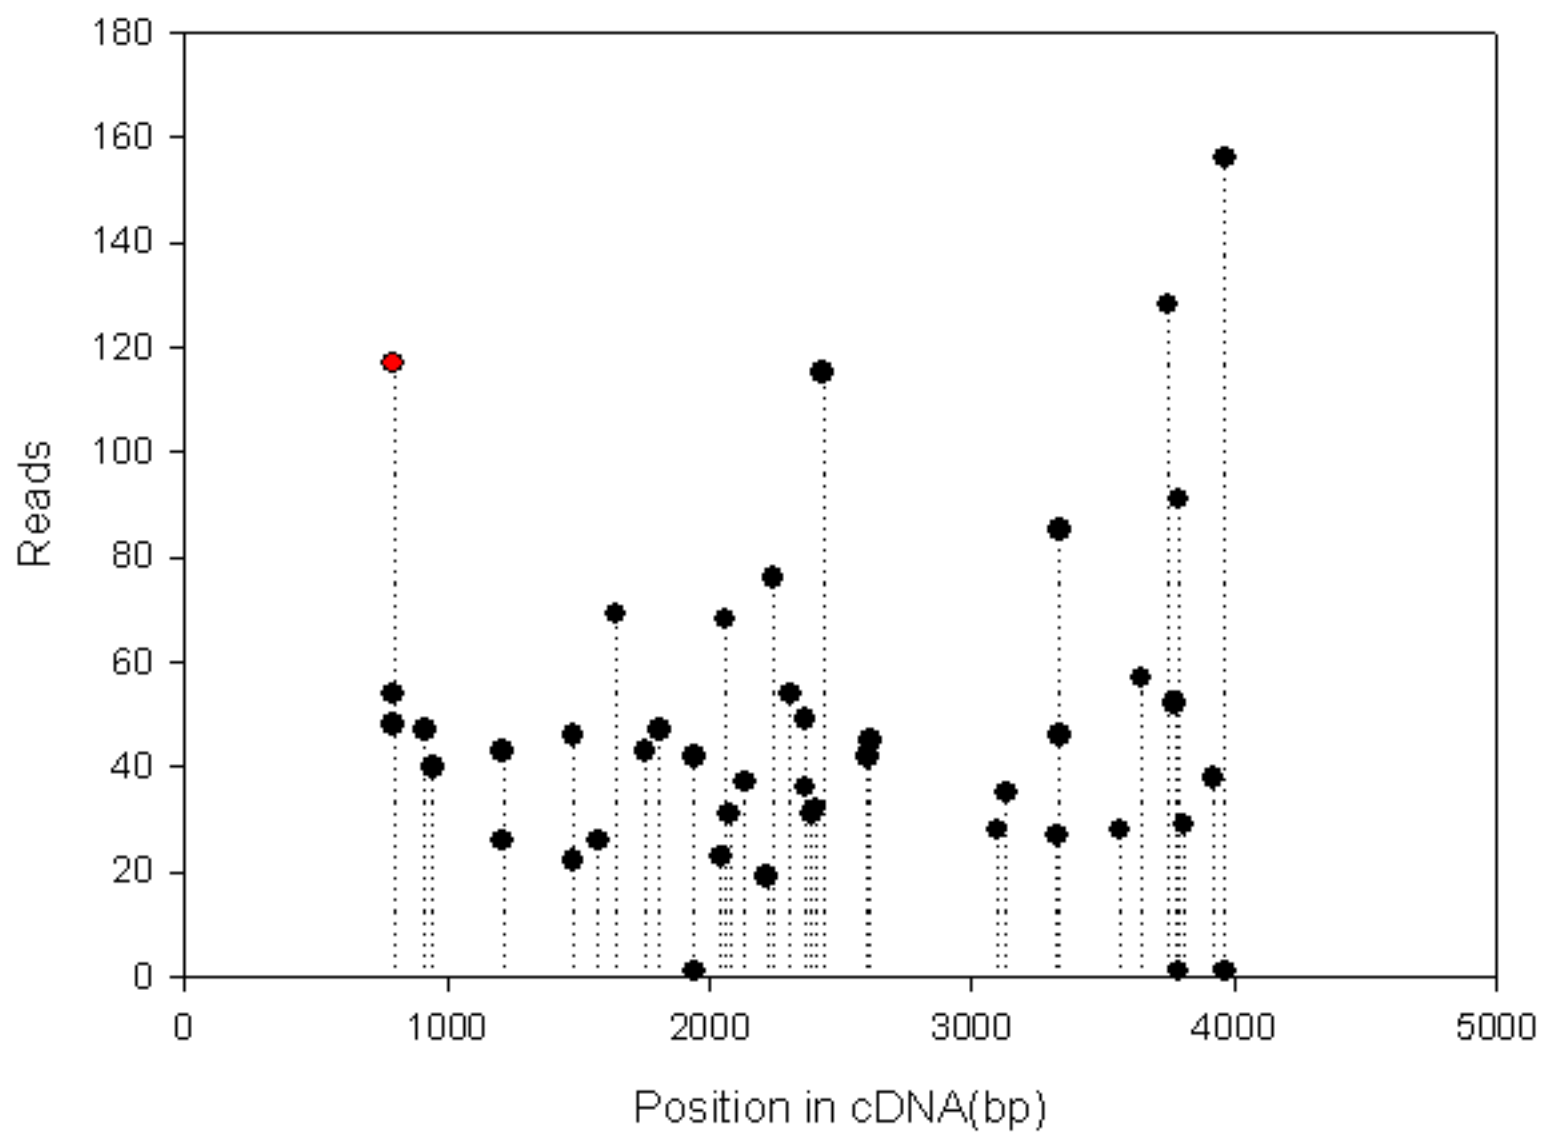

```

5' AUUCCCGAGCUACACCAAGCAACCCC 3'      Cs5g16710.1
   :::::  ::  :::::  ::
3' -AAGGGCUGGACGUGGUUCGCU----- 5'    Csi-miR168a
  
```

Csi-miR169b.1, target=Cs6g13560.1 gene=Cs6g13560  
 Category:2  
 Score=3.5  
 Cleavage Site=1307

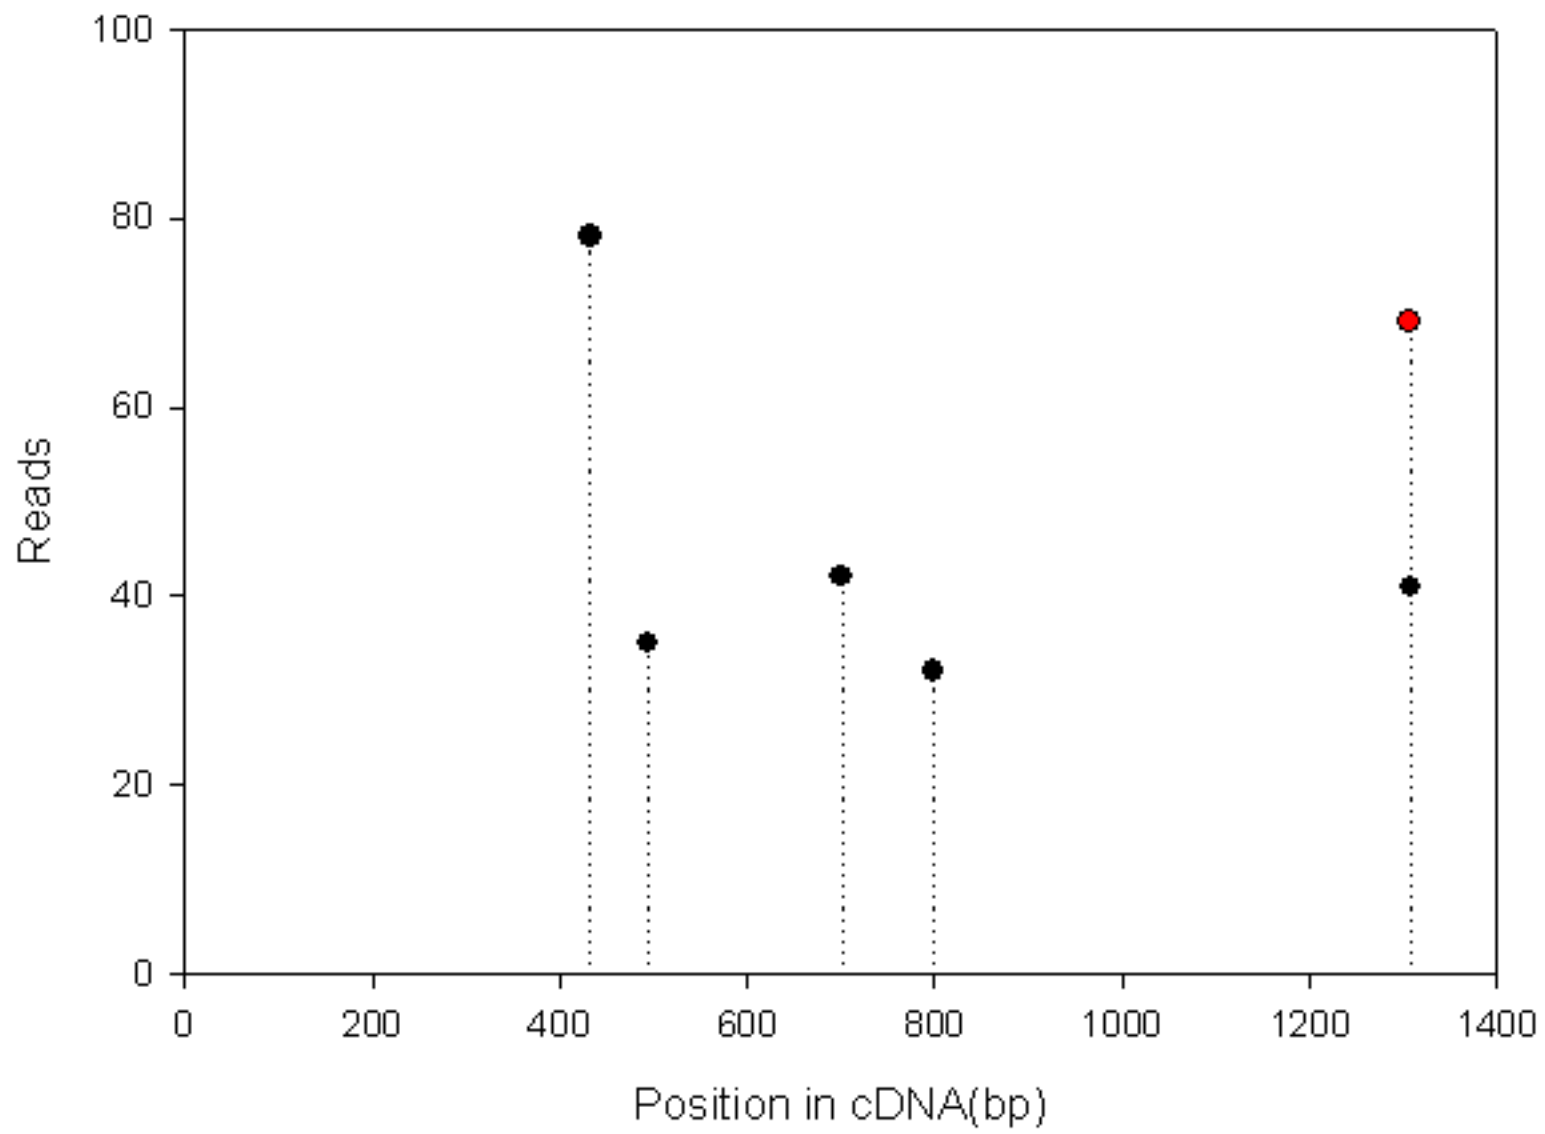

```

5' UUAGGCAAUUCAUUCUUGGCUCAUCU 3'      Cs6g13560.1
  . . . . . . . . . . . . . . . . . .
3' -GUCCGUUCAGUAGGAACCGAU----- 5'    Csi-miR169b.1
  
```

Csi-miR169b.1-3p, target=Cs2g28180.1 gene=Cs2g28180

Category:2

Score=5

Cleavage Site=544

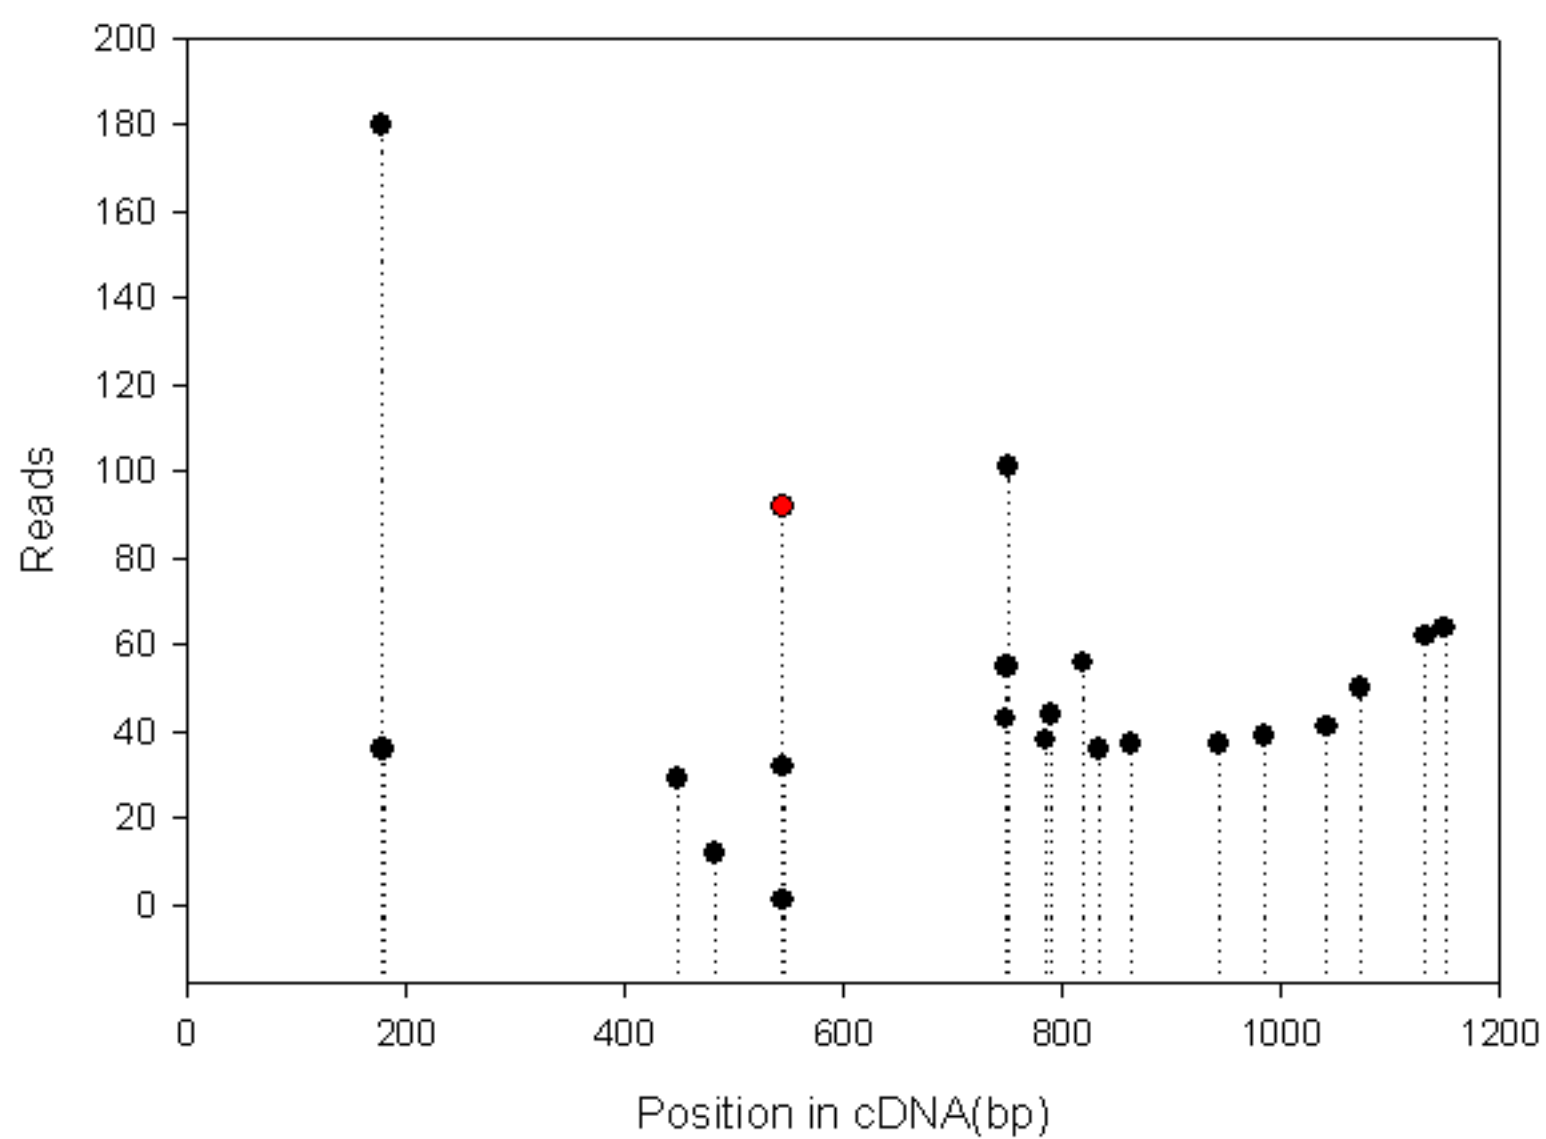

5' CCUCCCCUU-GCCACUGAGACUGCCU 3'

Cs2g28180.1

::: :::: ::::::::::::

3' -----GAAUCGGUUCUCUGACGGA 5'

Csi-miR169b.1-3p

Csi-miR169b.1-3p, target=Cs9g16380.1 gene=Cs9g16380  
 Category:3  
 Score=5  
 Cleavage Site=616

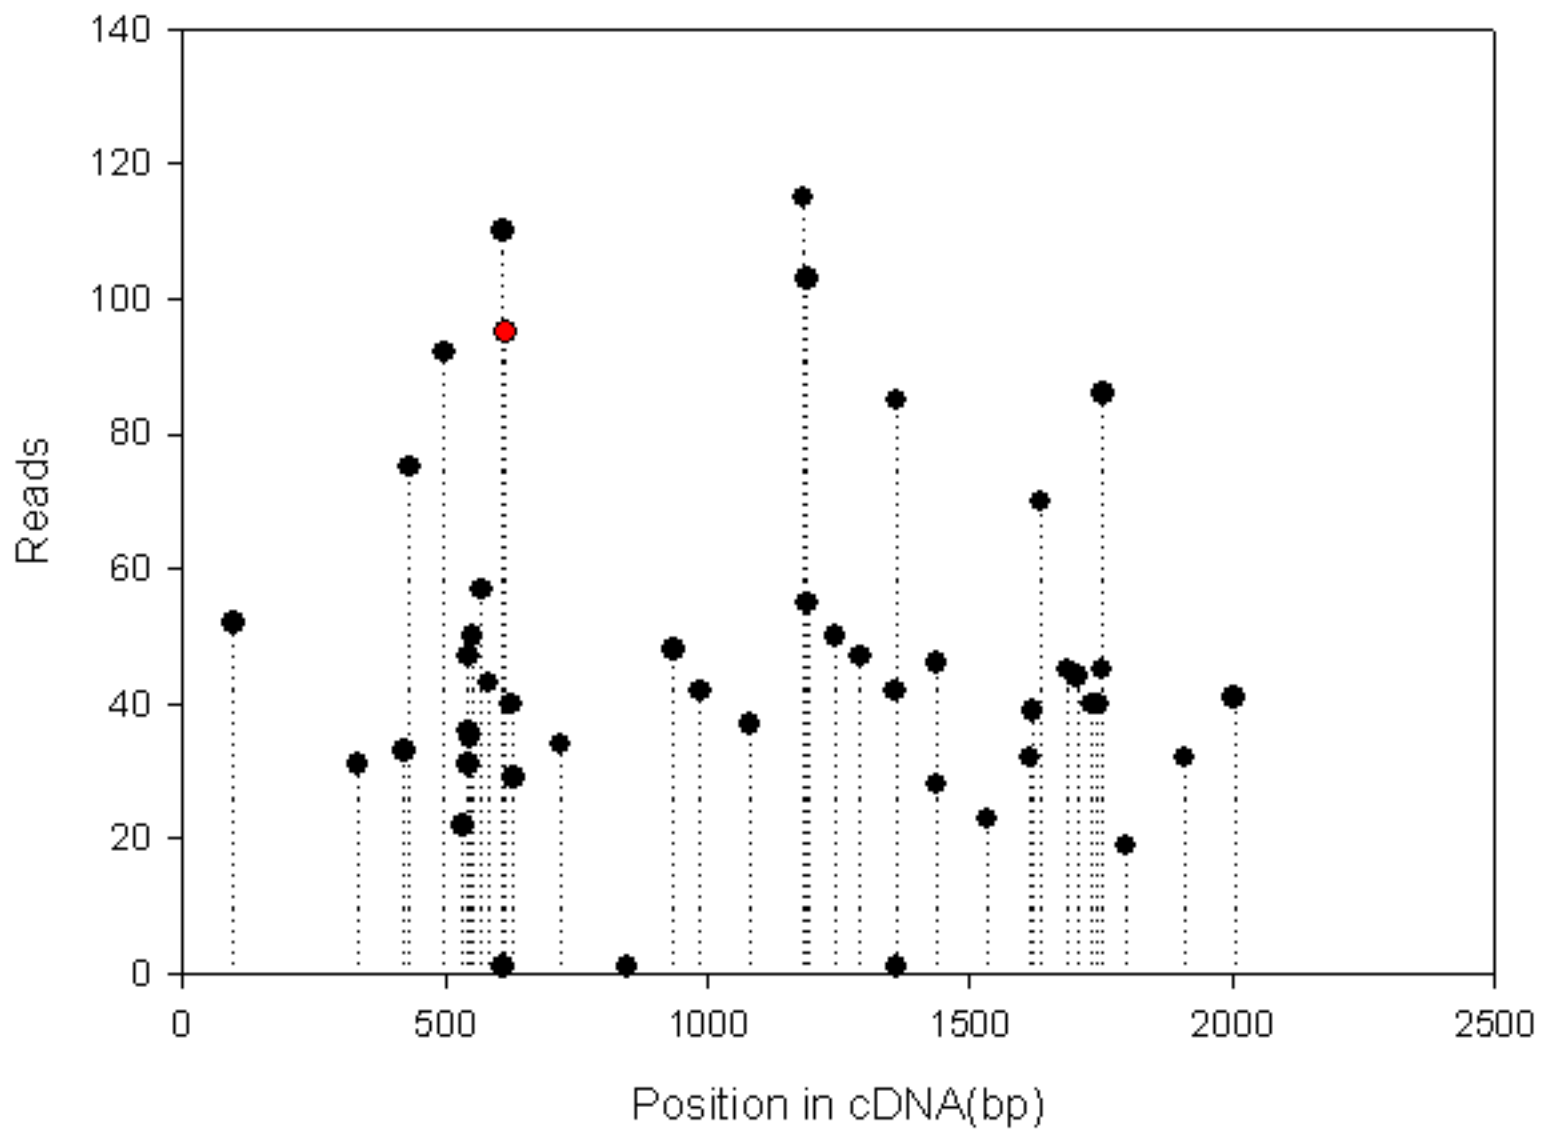

5' GUUGACAUCGCCAAGGGGAUUGCUUA 3'

Cs9g16380.1

: : : : : : : : : : : : : : : : :

3' -----GAAUCGGUCCUCUGACGGA- 5'

Csi-miR169b.1-3p

Csi-miR169h, target=Cs7g27875.1 gene=Cs7g27875  
 Category:1  
 Score=4.5  
 Cleavage Site=194

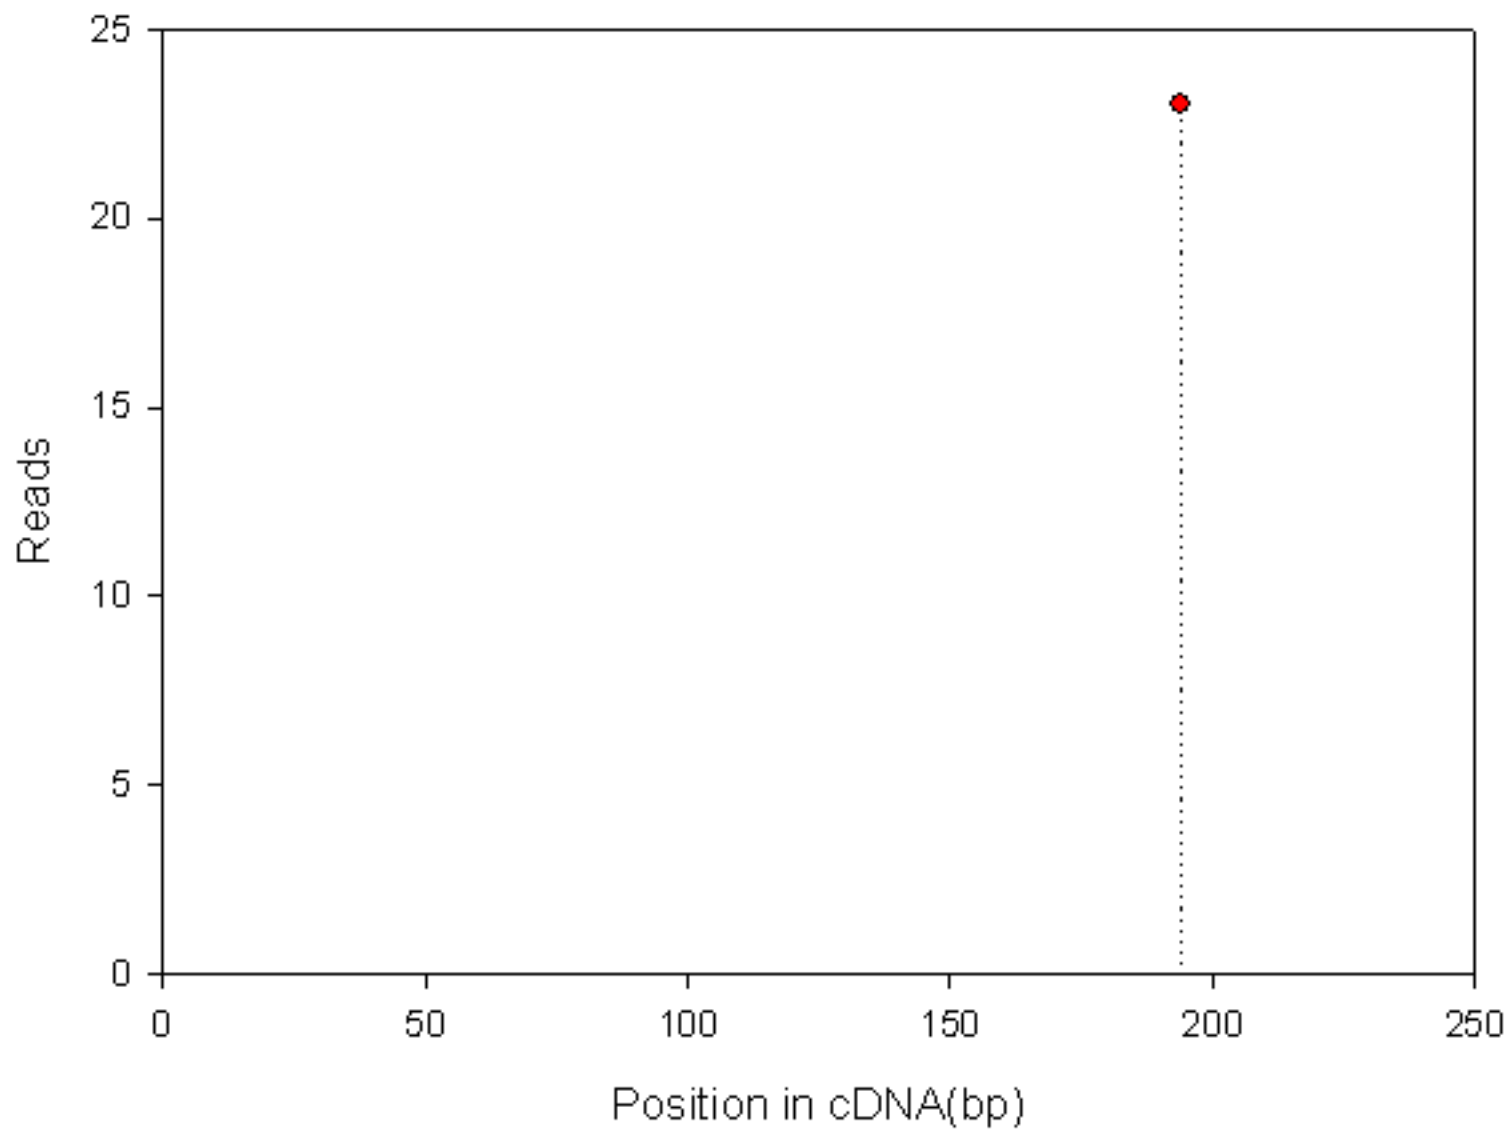

```

5' CAGGCAGGACAUCCUUGGUUUUCUAU 3'      Cs7g27875.1
   .....
3' GUCCGUUCAGUAGGAACCGAU----- 5'     Csi-miR169b.1
  
```

Csi-miR169i.1, target=Cs6g13560.1 gene=Cs6g13560  
 Category:2  
 Score=3.5  
 Cleavage Site=1307



```

5' UUAGGCAAUCAUUCUUGGCUCAUCU 3'      Cs6g13560.1
   .....
3' AGUCCGUUCAGUAGGAACCGAU----- 5'   Csi-miR169i.1
  
```

Csi-miR169i.1-3p, target=Cs4g06620.1 gene=Cs4g06620  
 Category:3  
 Score=5  
 Cleavage Site=923

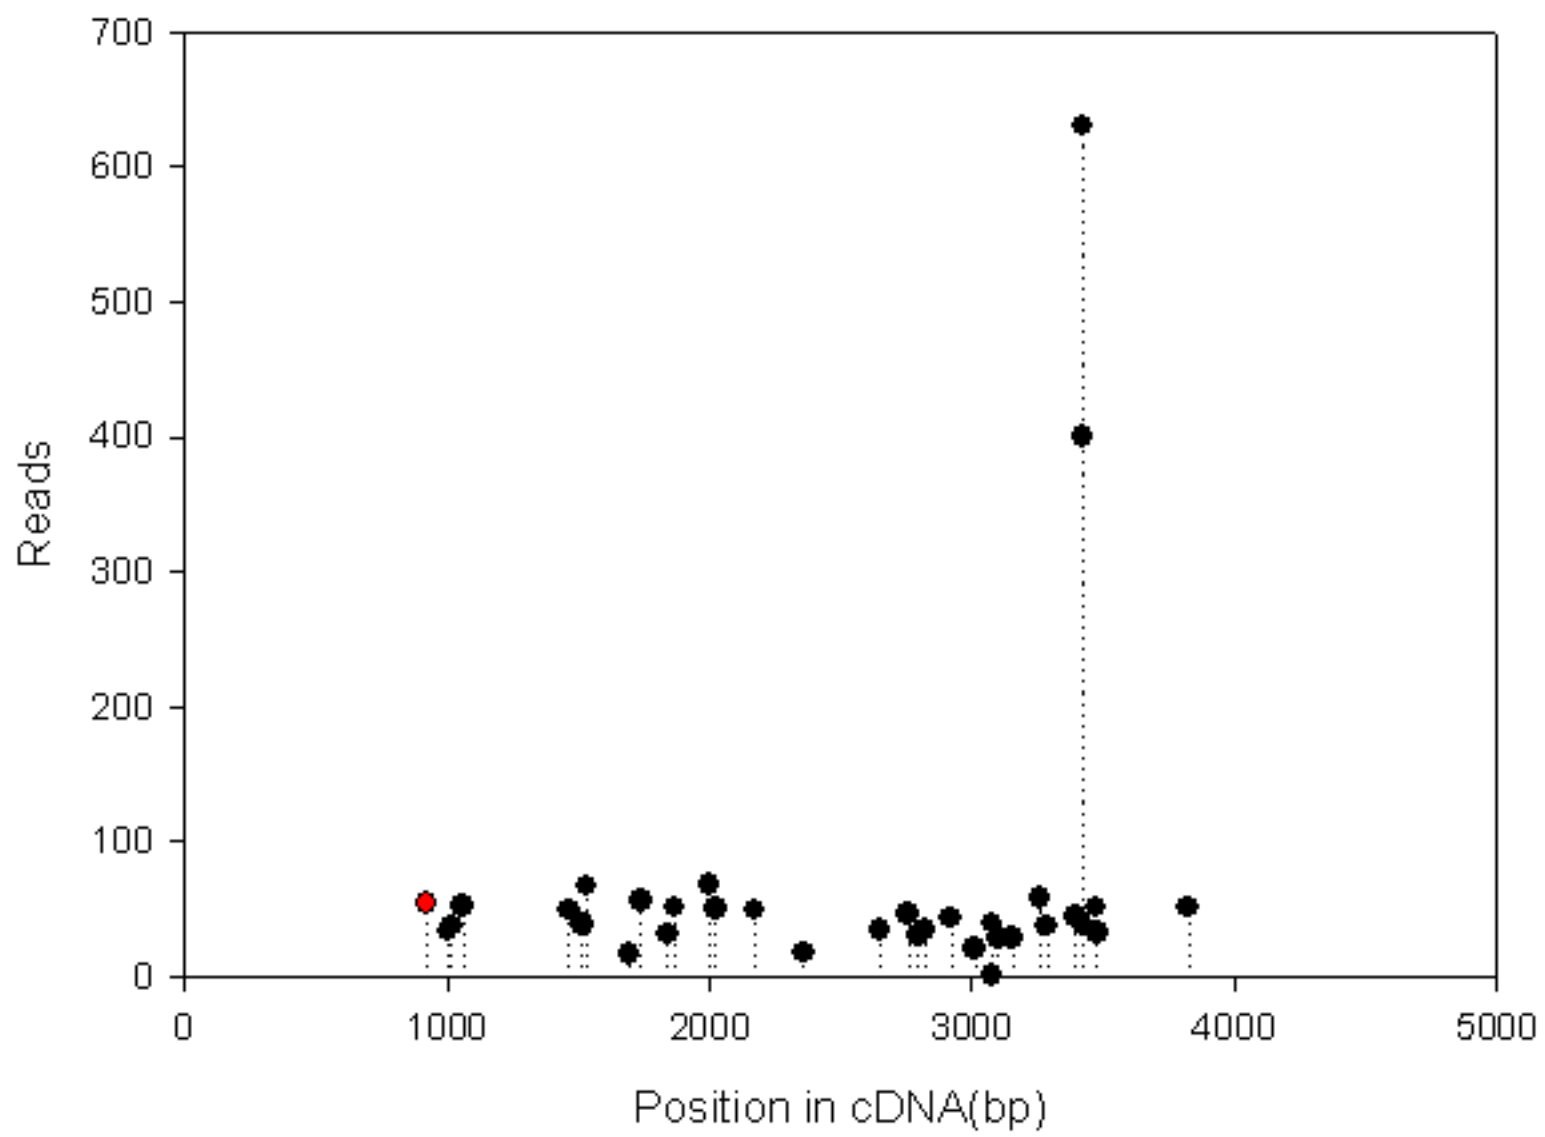

5' ACUUUUGUUGAGCCAAGUAGACUUC 3'

Cs4g06620.1

   ::: ::::: :::: ::

3' -----CAA-UCGGUCCUCUGACGG 5'

Csi-miR169i.1-3p



Csi-miR169i.1-3p, target=Cs7g12040.1 gene=Cs7g12040  
 Category:3  
 Score=5  
 Cleavage Site=1874

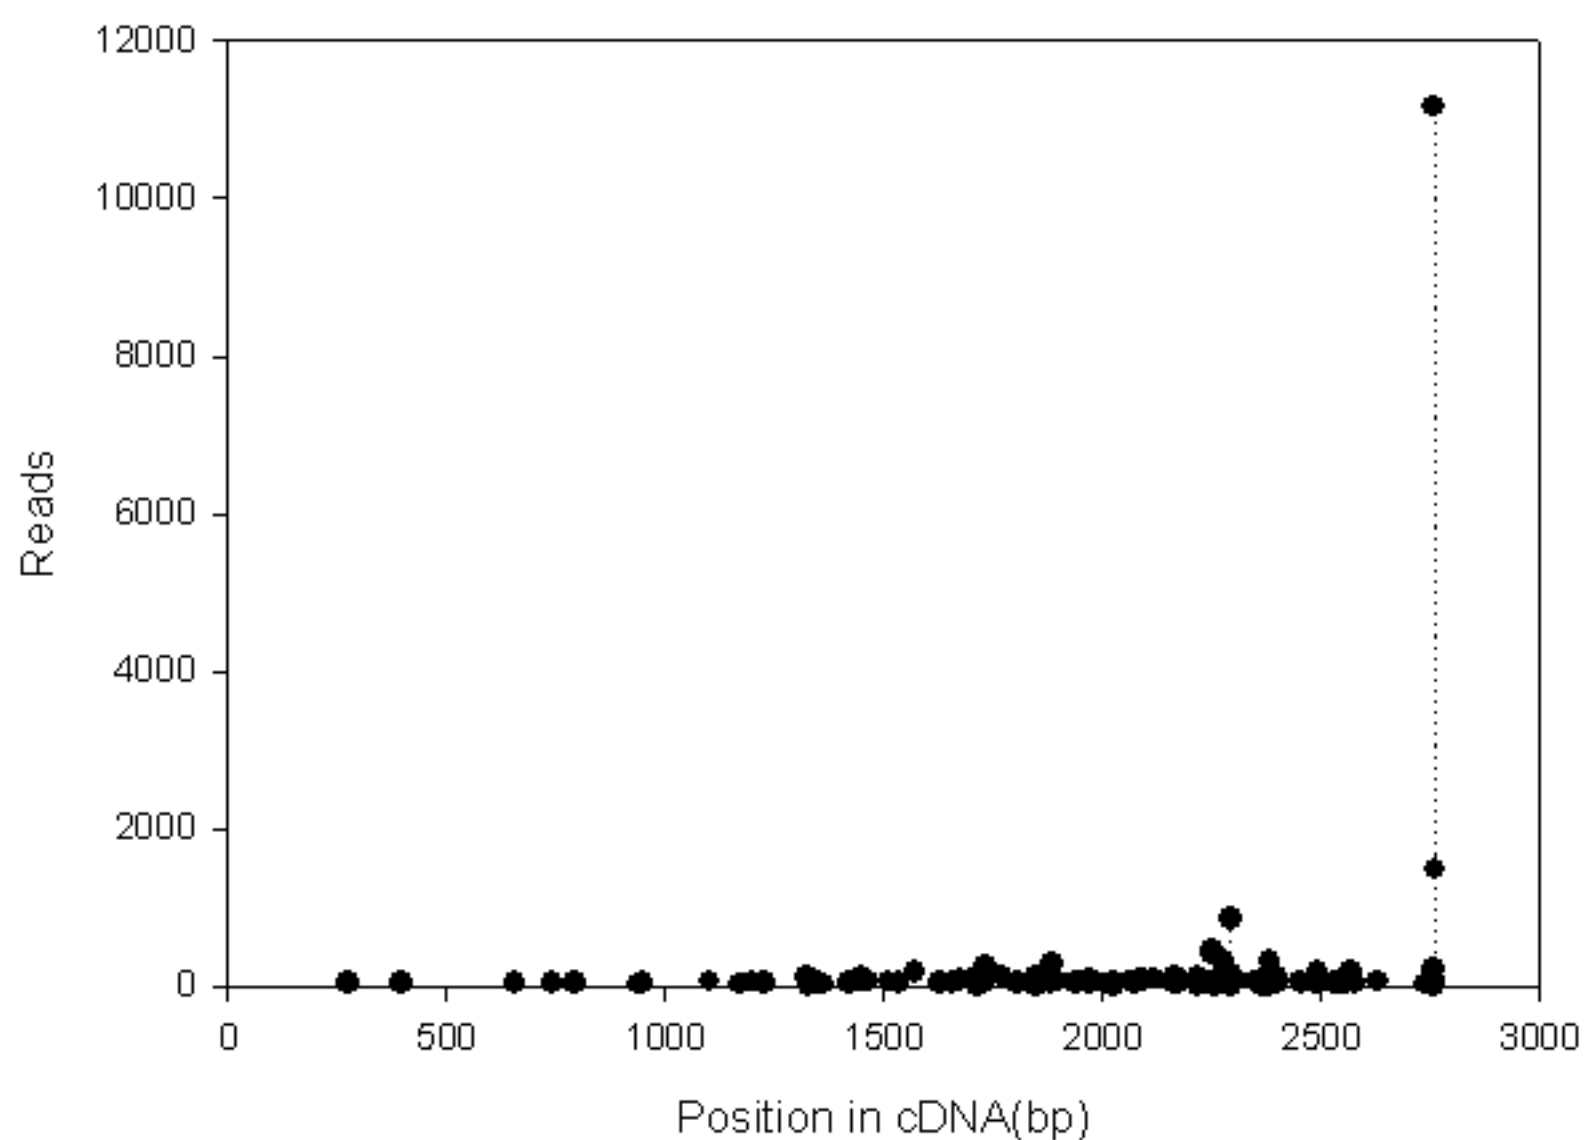

```

5' GCACAAUUUUUCUCAAGGAGGCUGCU 3'
   :: .:~::~~::~~::~~::~~::~~::~~::
3' -----CAAUCGGUCCUCUGACGG 5'
  
```

Cs7g12040.1

Csi-miR169i.1-3p

Csi-miR169m.1, target=Cs6g13560.1 gene=Cs6g13560  
 Category:2  
 Score=4.5  
 Cleavage Site=1307



```

5' UUAGGCAAU CAUUCUUGGCUCAUCU 3'      Cs6g13560.1
.  :::::  :::::
3' -GGCCGUUCAGUAGGAACCGAC----- 5'    Csi-miR169m.1

```

Csi-miR169m.1, target=Cs8g17280.1 gene=Cs8g17280  
 Category:3  
 Score=4.5  
 Cleavage Site=46

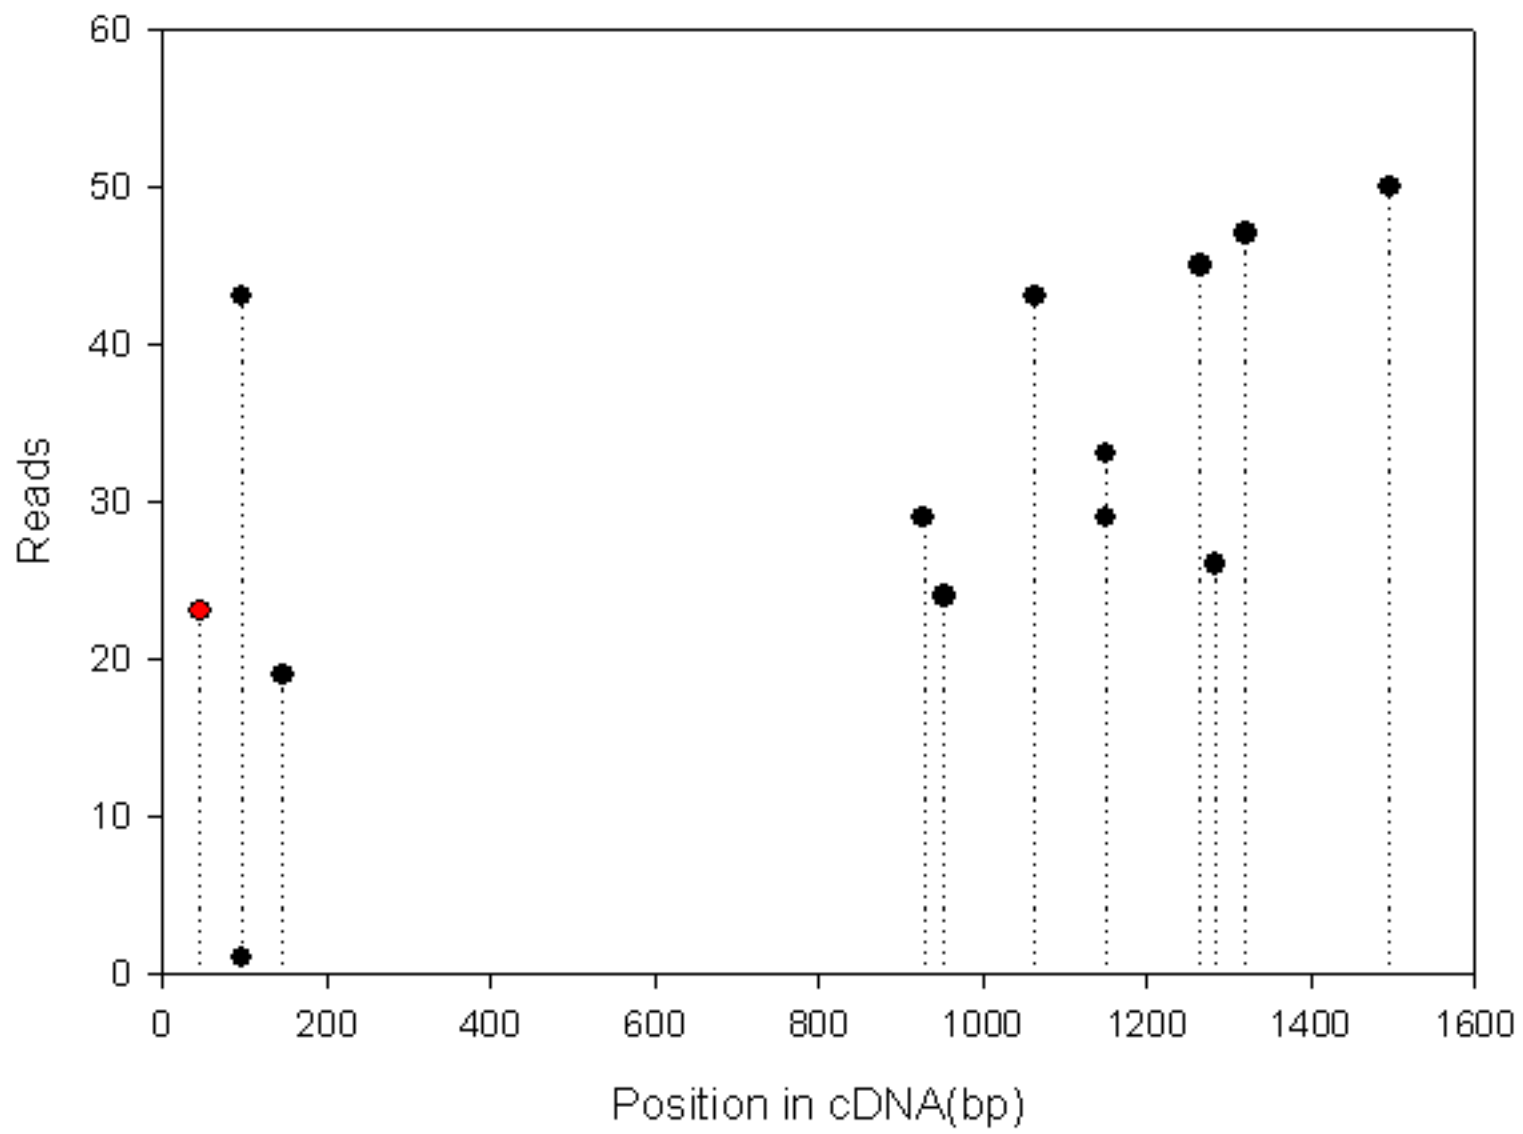

```

5' CGUCUGGCAAGUCACCCGUGGCUGAG 3'      Cs8g17280.1
   :.:.:.:.:.:.:.:.:.:.:.:.:.:.:
3' ---GGCCGUUCAGUAGGAACCGAC-- 5'      Csi-miR169m.1

```

Csi-miR171b.1, target=Orange1.1t00200.1 gene=Orange1.1t00200  
 Category:1  
 Score=1  
 Cleavage Site=1514

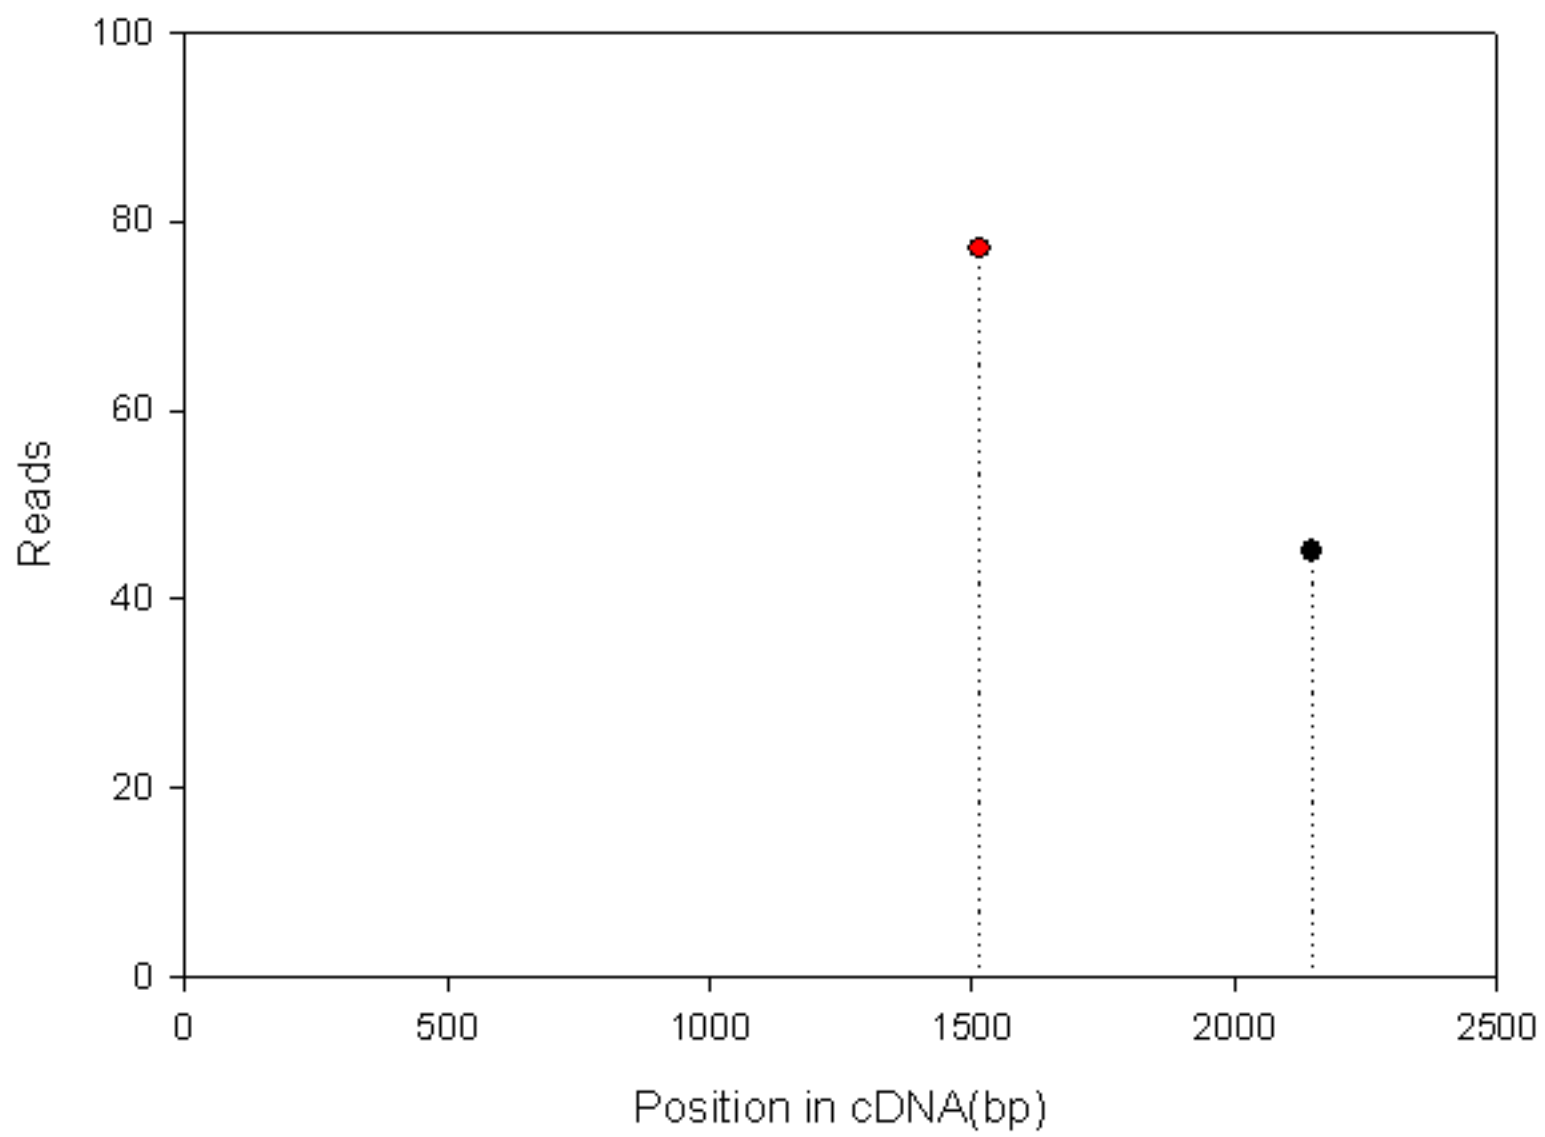

```

5'  GGAUAUUGGCGCGGCUCAUACACCAG 3'      Orange1.1t00200.1
      ::::::::::::::::::::
3'  -CUAUAACCGUGCCGAGUUAGU----- 5'    Csi-miR171g.1
  
```

Csi-miR171g.1, target=Orange1.1t00199.1 gene=Orange1.1t00199  
 Category:1  
 Score=1  
 Cleavage Site=1615

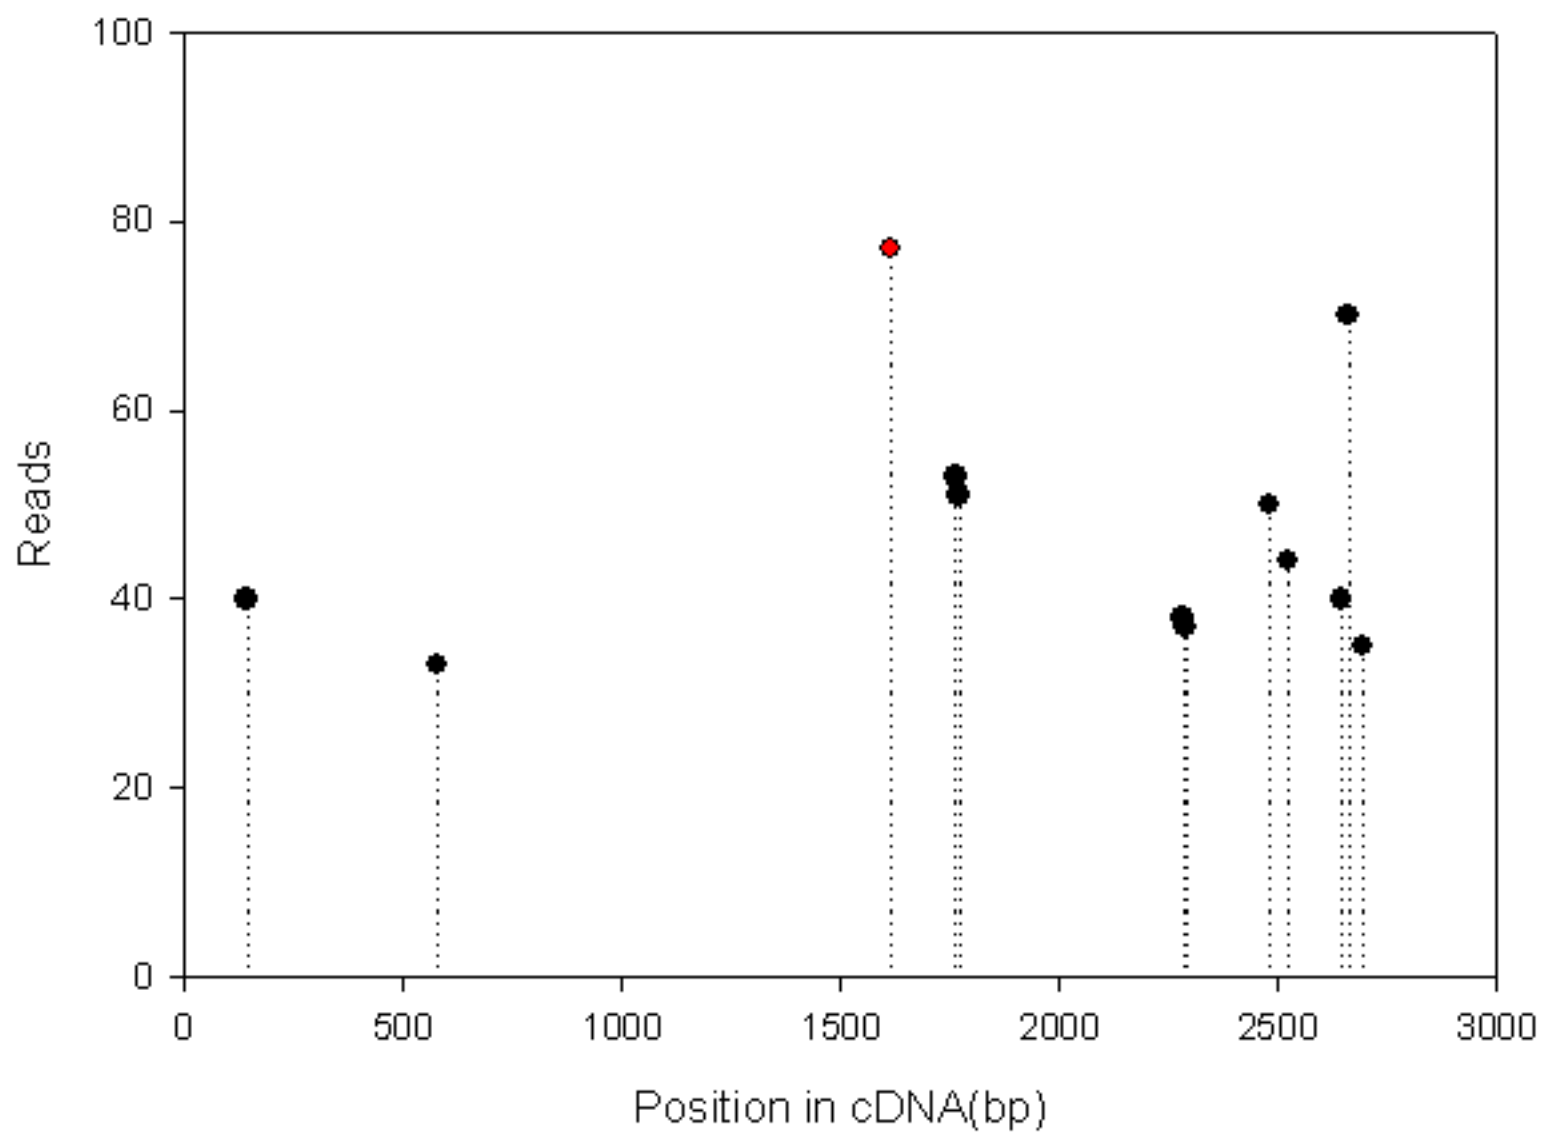

5' GGAUUAUUGGCGCGGCUCAAUCCAG 3'  
 :::::::::::::::::::::  
 3' -CUAUAACCGUGCCGAGUUAGU---- 5'

Orange1.1t00199.1  
 Csi-miR171g.1

Csi-miR172a-3p.1, target=Cs2g04660.1 gene=Cs2g04660

Category:2

Score=4.5

Cleavage Site=1098

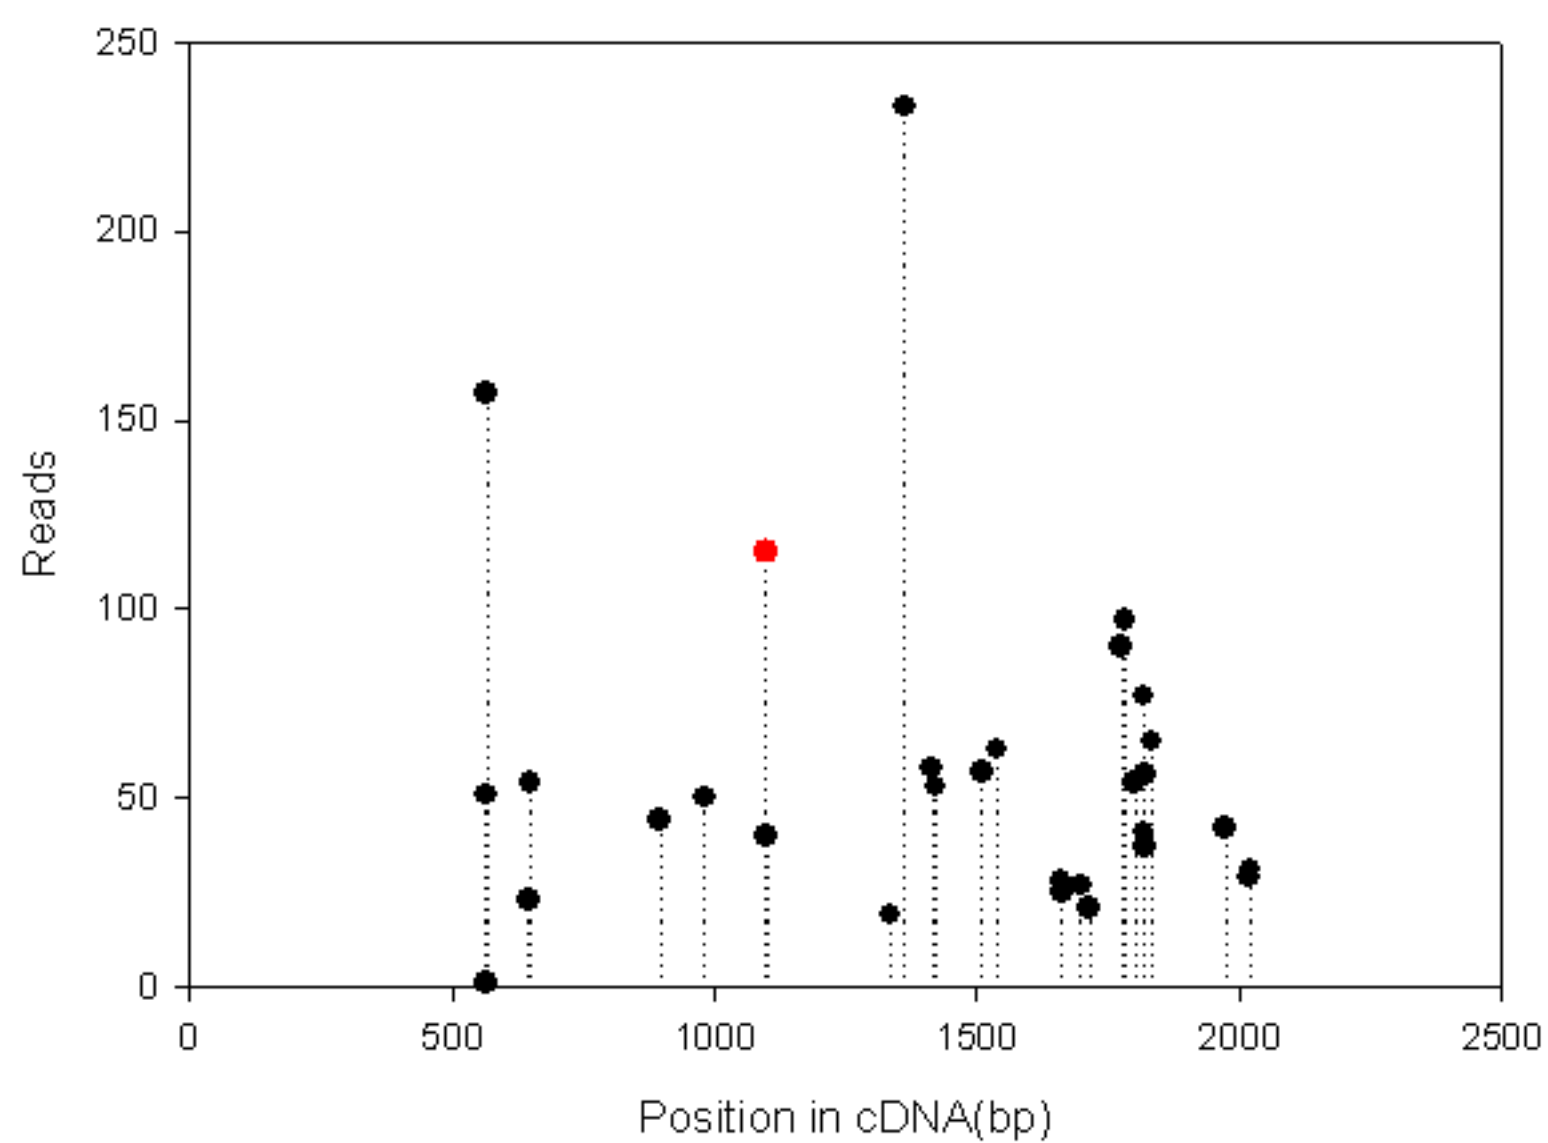

5' CUUGUAGAGAUUAUCAAGGUUCUCGG 3'

Cs2g04660.1

.....

3' --ACGUC-GUAGUAGUUCUAAGA--- 5'

Csi-miR172a-3p.1

Csi-miR172a-3p.1, target=Cs7g02590.1 gene=Cs7g02590  
 Category:3  
 Score=5  
 Cleavage Site=4764

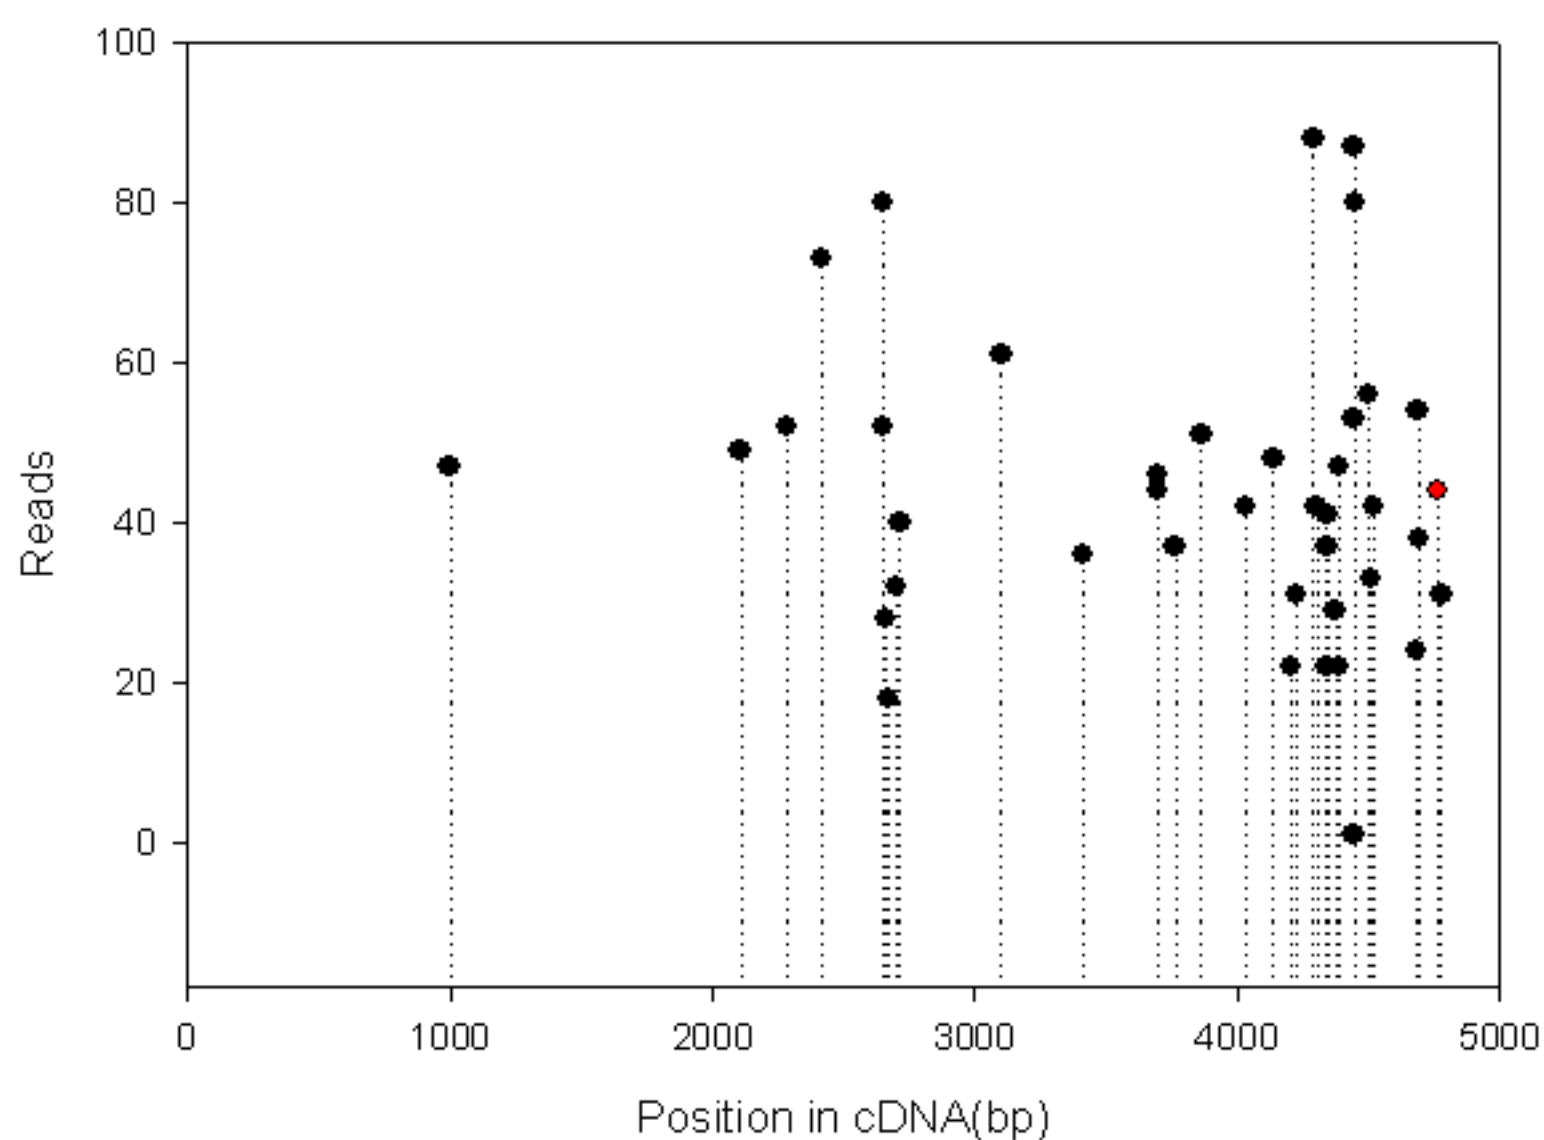

```

5' AGCGCAGCCU-AUCAAGAUUUUUCUUU 3'      Cs7g02590.1
   : : : : : : : : : : : : : : : :
3' --ACGUCGUAGUAGUUCUAAGA----- 5'      Csi-miR172a-3p.1
  
```

Csi-miR172a-3p.1,target=Orange1.1t04055.1 gene=Orange1.1t04055

Category:3

Score=2

Cleavage Site=2049

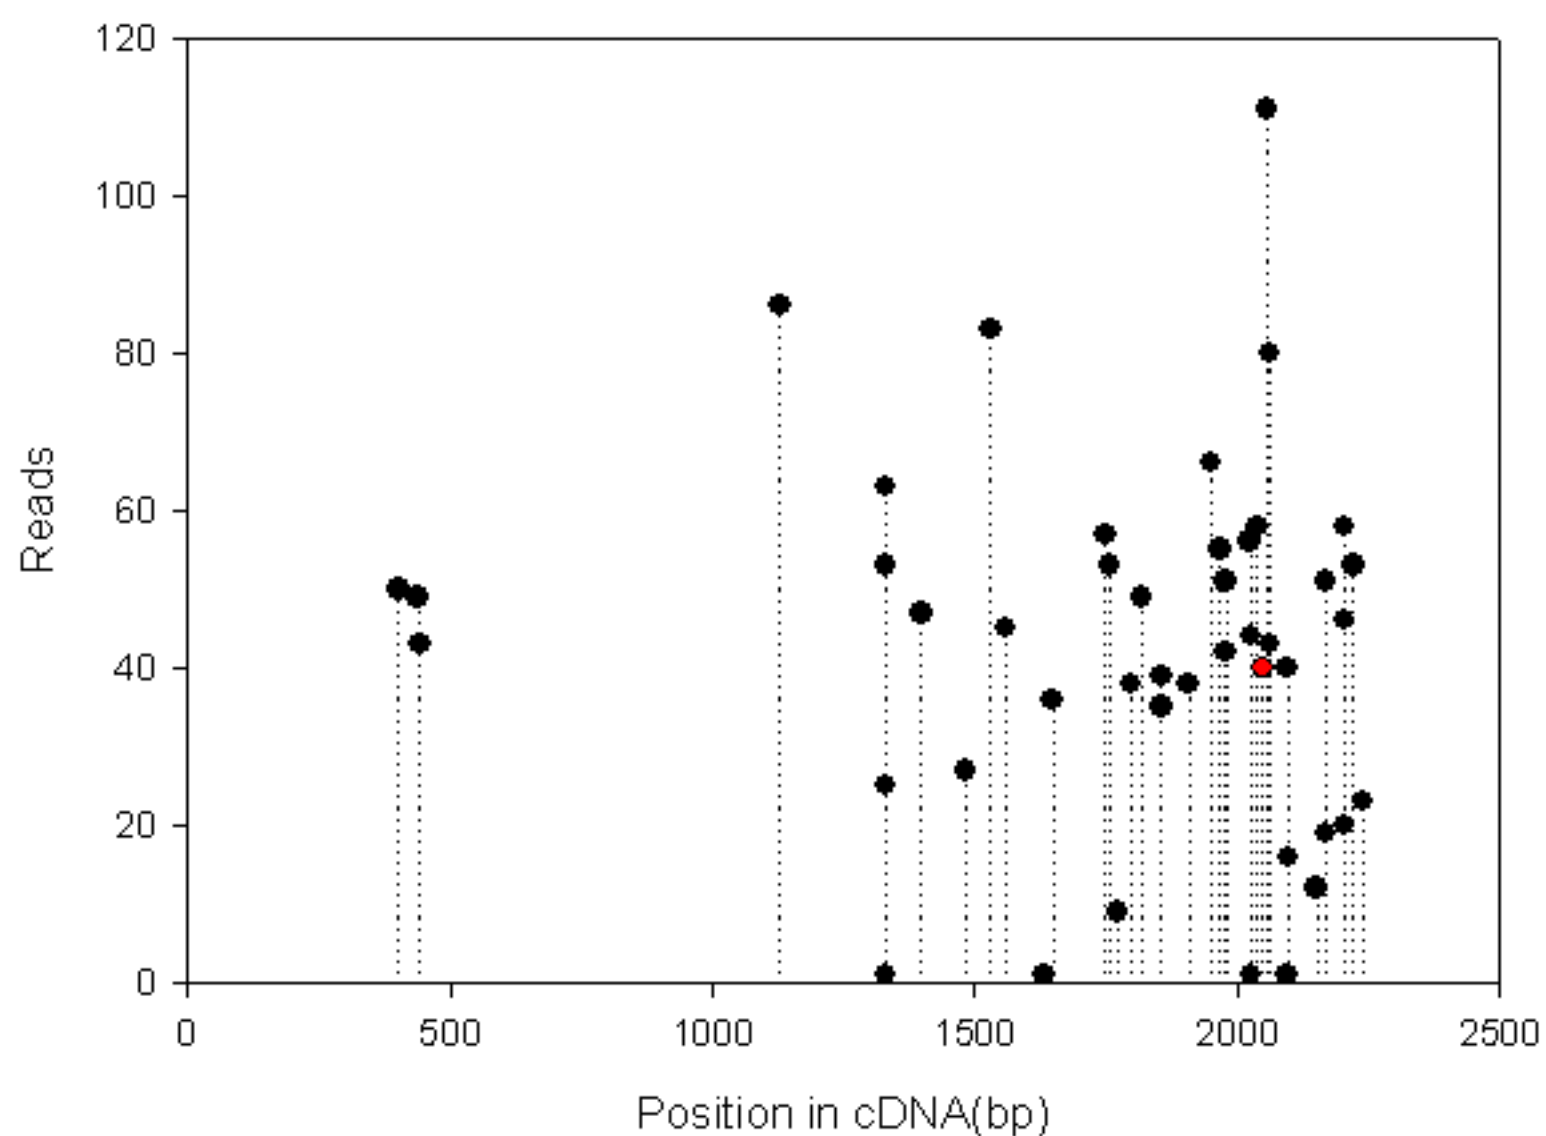

5' GCUGCAGCAUCAUCAGGAUCCCUCA 3'

.....

3' --ACGUCGUAGUAGUUCUAAGA---- 5'

Orange1.1t04055.1

Csi-miR172a-3p.1



Csi-miR172a-3p.2, target=Cs2g04660.1 gene=Cs2g04660  
 Category:2  
 Score=4.5  
 Cleavage Site=1098

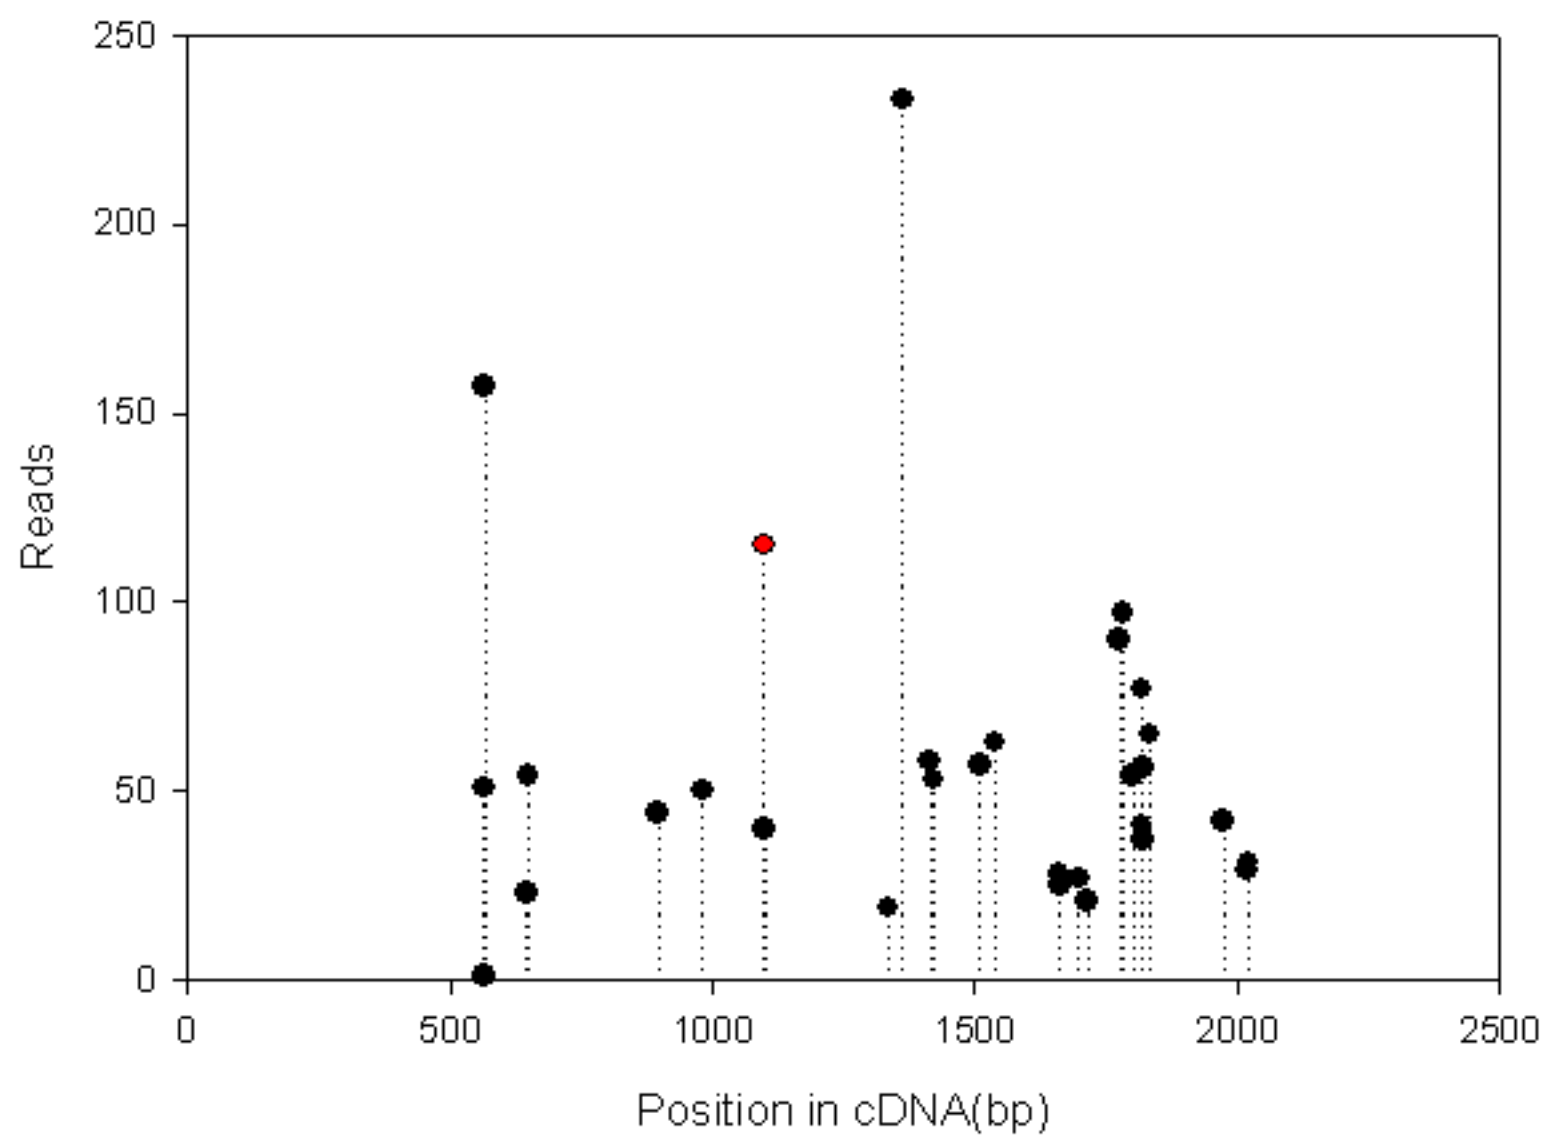

|                                  |                  |
|----------------------------------|------------------|
| 5' CUUGUAGAGAUUAUCAAGGUUCUCGG 3' | Cs2g04660.1      |
| .....                            |                  |
| 3' -AACGUC-GUAGUAGUUCUAAGA--- 5' | Csi-miR172a-3p.2 |

Csi-miR172a-3p.2,target=Orange1.1t04055.1 gene=Orange1.1t04055

Category:3

Score=3

Cleavage Site=2049



5' GCUGCAGCAUCAUCAGGAUCCCUCA 3'

.....

3' -AACGUCGUAGUAGUUCUAAGA---- 5'

Orange1.1t04055.1

Csi-miR172a-3p.2

Csi-miR172a-3p.3, target=Cs2g04660.1 gene=Cs2g04660  
 Category:2  
 Score=4.5  
 Cleavage Site=1098

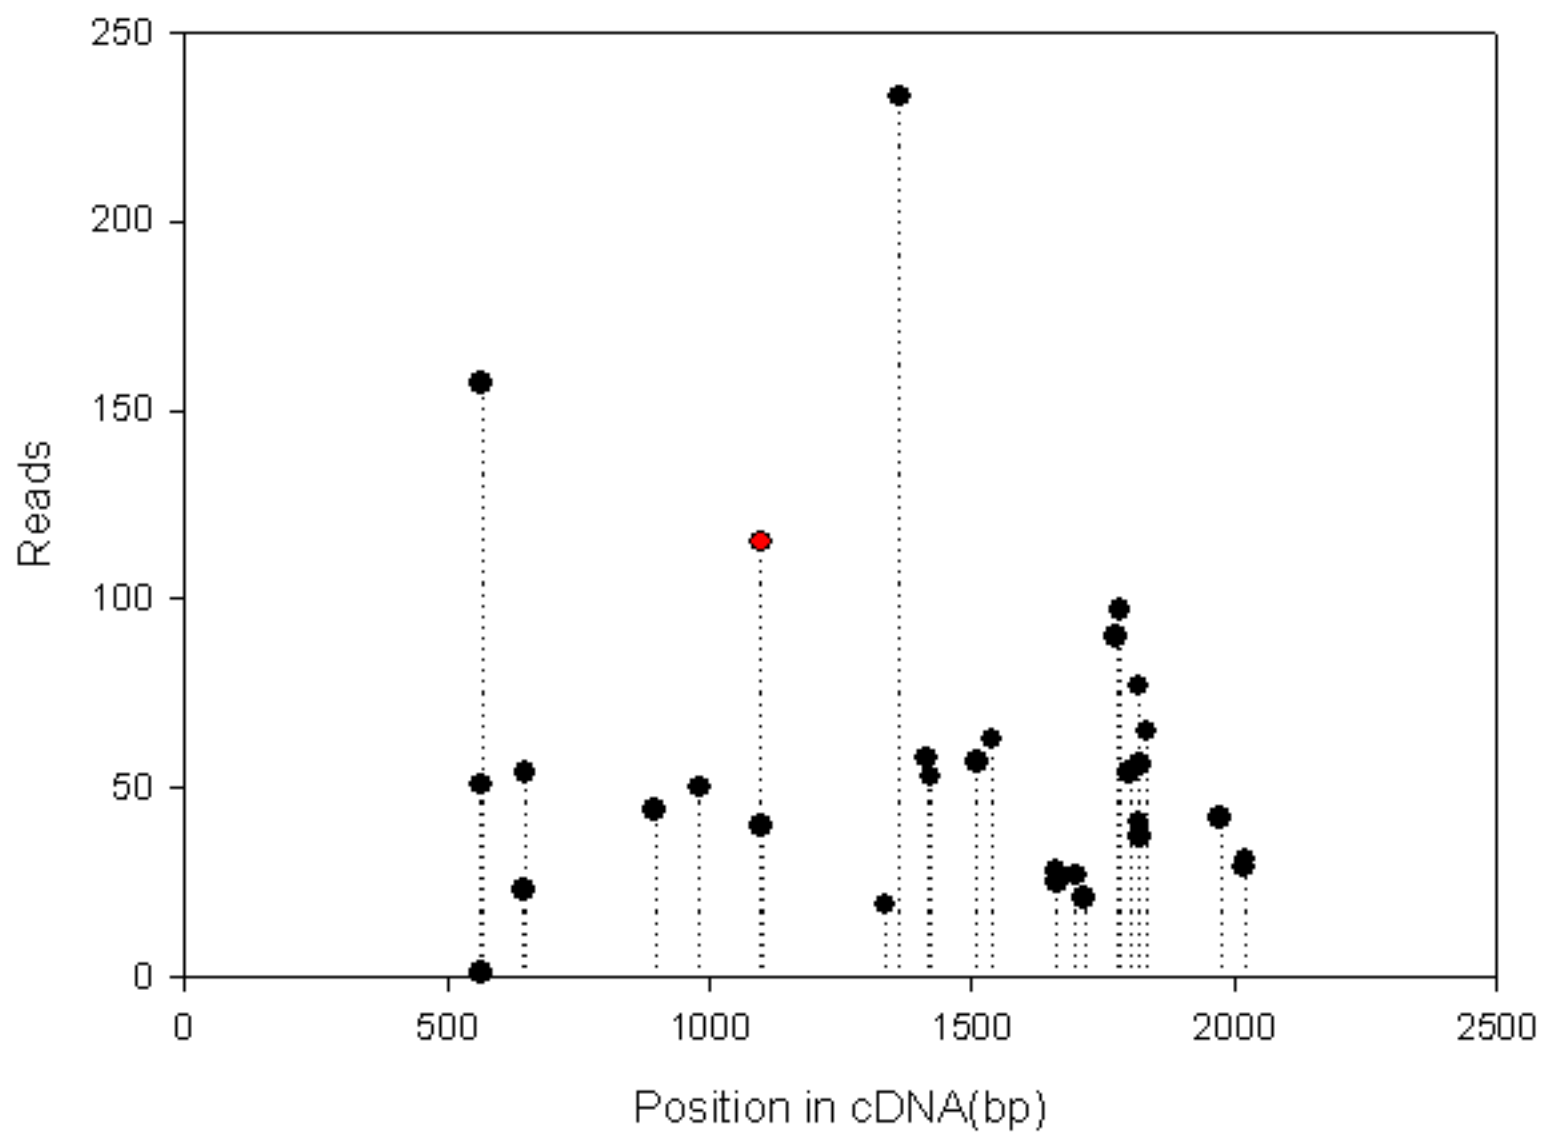

|                                                   |                  |
|---------------------------------------------------|------------------|
| 5' CUUGUAGAGAUUAUCAAGGUUCUCGG 3'                  | Cs2g04660.1      |
| :  :  :  :  :  :  :  :  :  :  :  :  :  :  :  :  : |                  |
| 3' -AACGUC-GUAGUAGUUCUAAG----- 5'                 | Csi-miR172a-3p.3 |

Csi-miR172a-3p.3, target=Cs2g21180.1 gene=Cs2g21180  
 Category:3  
 Score=5  
 Cleavage Site=438

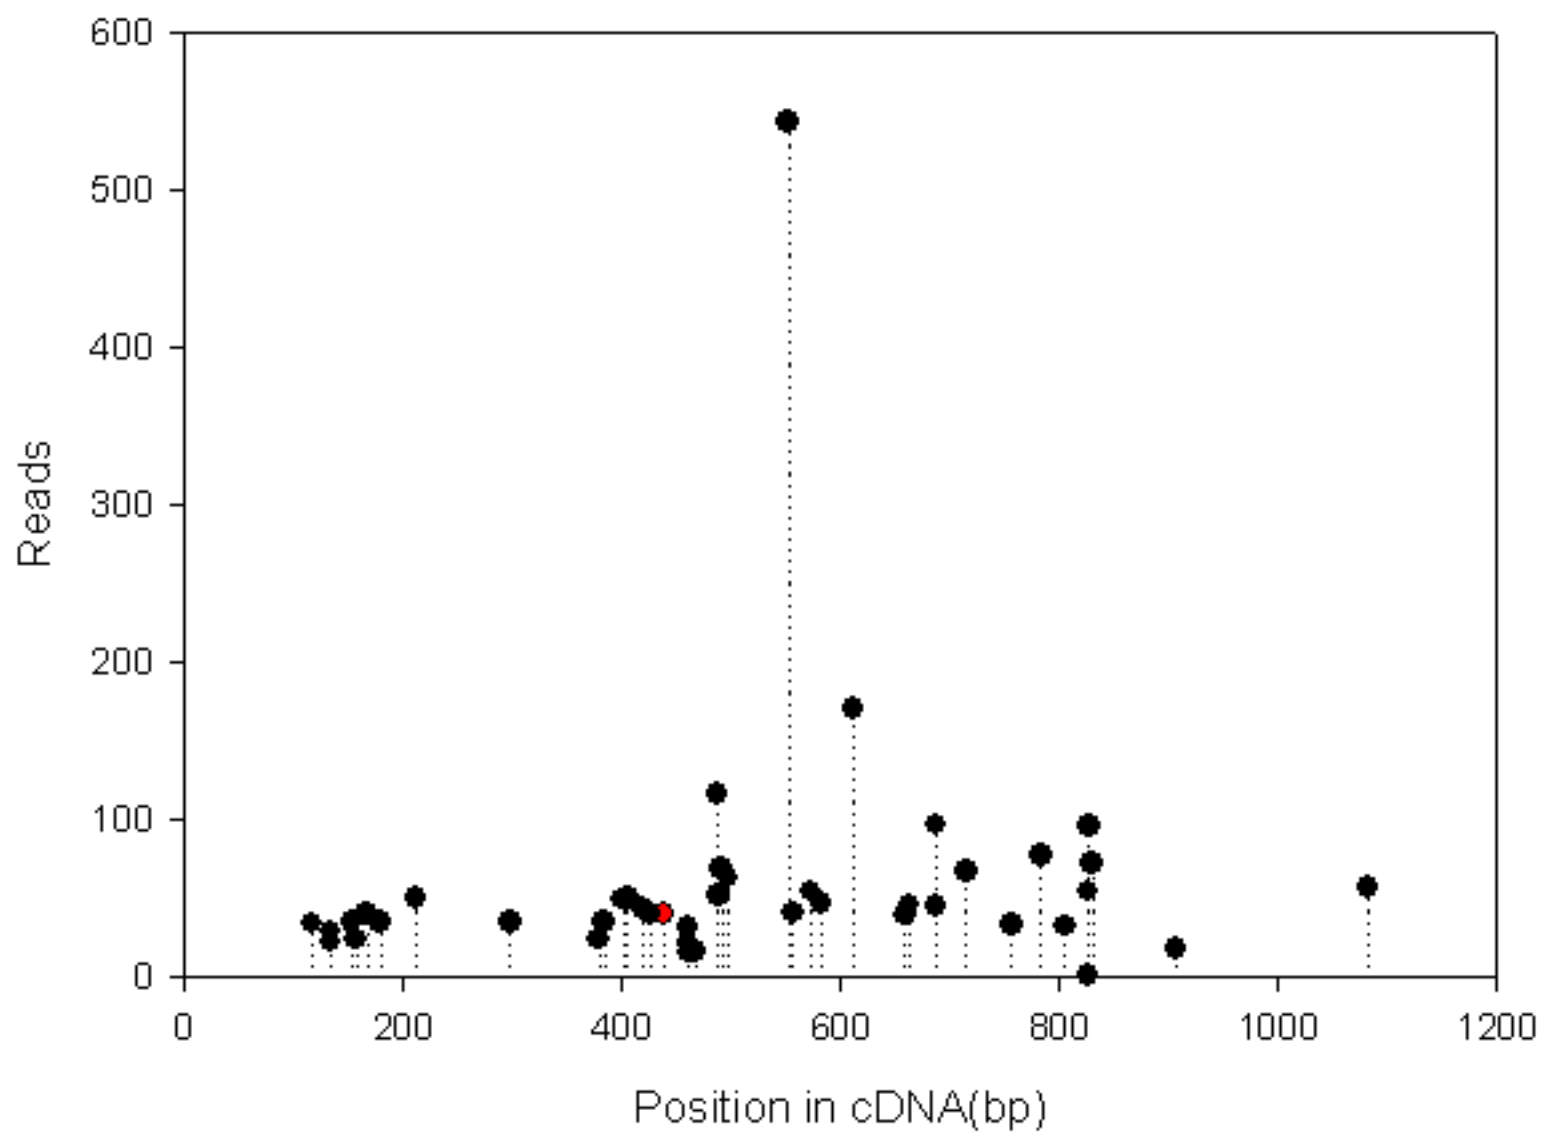

|                                   |                  |
|-----------------------------------|------------------|
| 5' UUACAGCAUCCUCAAGAUC CAGCAAC 3' | Cs2g21180.1      |
| .. : : : : : : : : : : : :        |                  |
| 3' AACGUCGUAGUAGUUCUAAG----- 5'   | Csi-miR172a-3p.3 |

Csi-miR172a-3p.3, target=Orange1.1t04055.1 gene=Orange1.1t04055

Category:3

Score=2

Cleavage Site=2049



5' GCUGCAGCAUCAUCAGGAUCCCUCA 3'

.....

3' -AACGUCGUAGUAGUUCUAAG----- 5'

Orange1.1t04055.1

Csi-miR172a-3p.3

Csi-miR172c.1, target=Cs1g21180.1 gene=Cs1g21180  
 Category:3  
 Score=4  
 Cleavage Site=3251

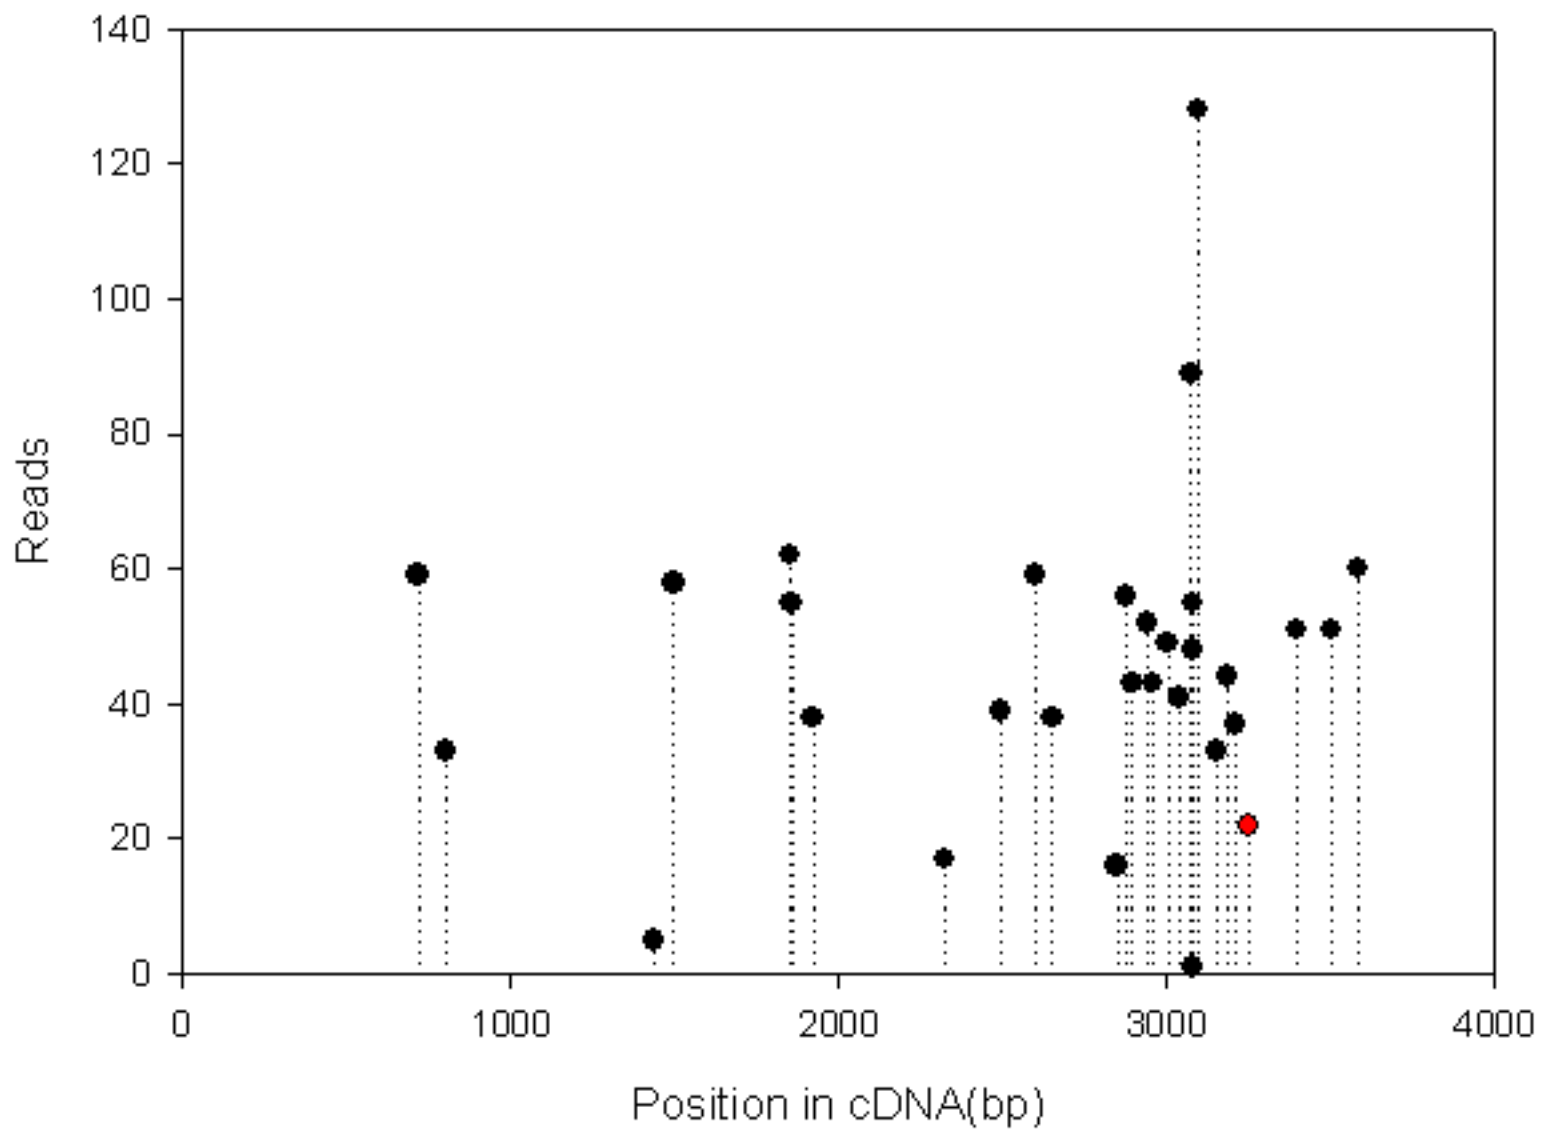

```

5' UUGUAGAUAAAG-AUCAUUAAGAUUUCU 3'      Cs1g21180.1
      :: ::::::::::::::::::::
3' -----UCGUAGUAGUUCUAAGGU 5'      Csi-miR172c.1
  
```

Csi-miR172c.1, target=Cs2g04660.1 gene=Cs2g04660  
 Category:2  
 Score=5  
 Cleavage Site=1098

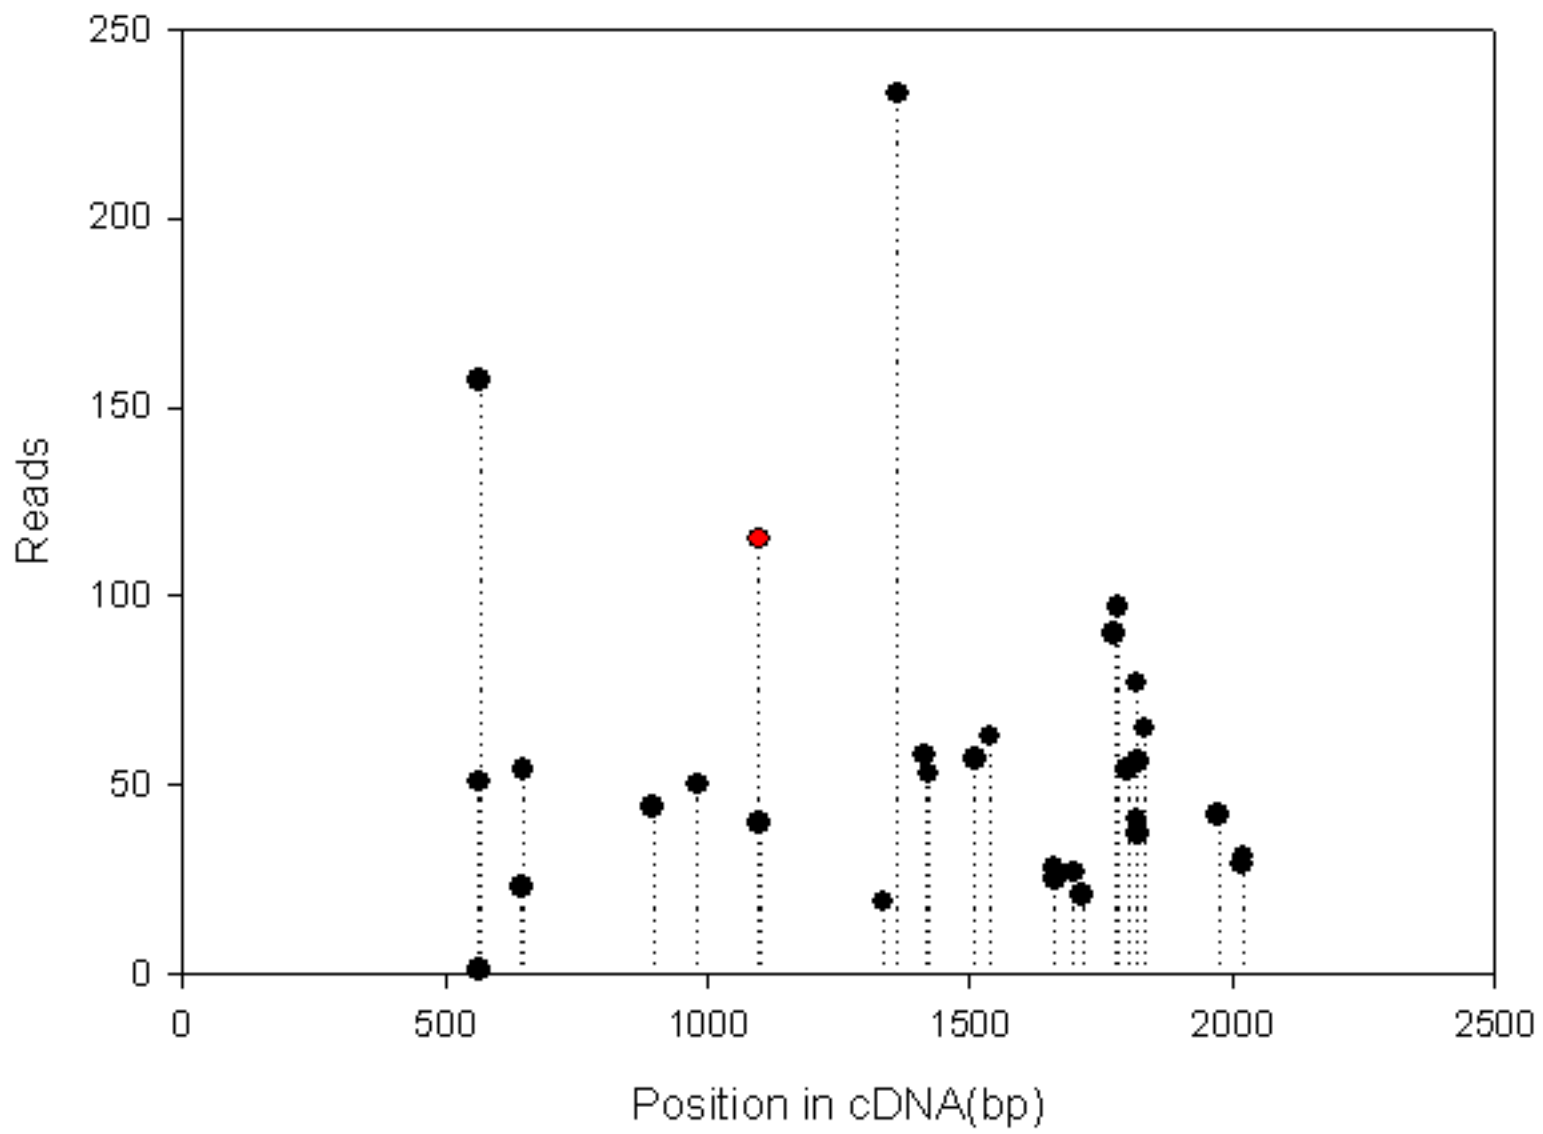

```

5' CUUGUAGAG-AUUAUCAAGGUUCUCGG 3'      Cs2g04660.1
      :: ::::::::::::::
3' -----UCGUAGUAGUUCUAAGGU-- 5'      Csi-miR172c.1
  
```

Csi-miR172c.1, target=Cs2g21180.1 gene=Cs2g21180  
 Category:3  
 Score=4  
 Cleavage Site=438

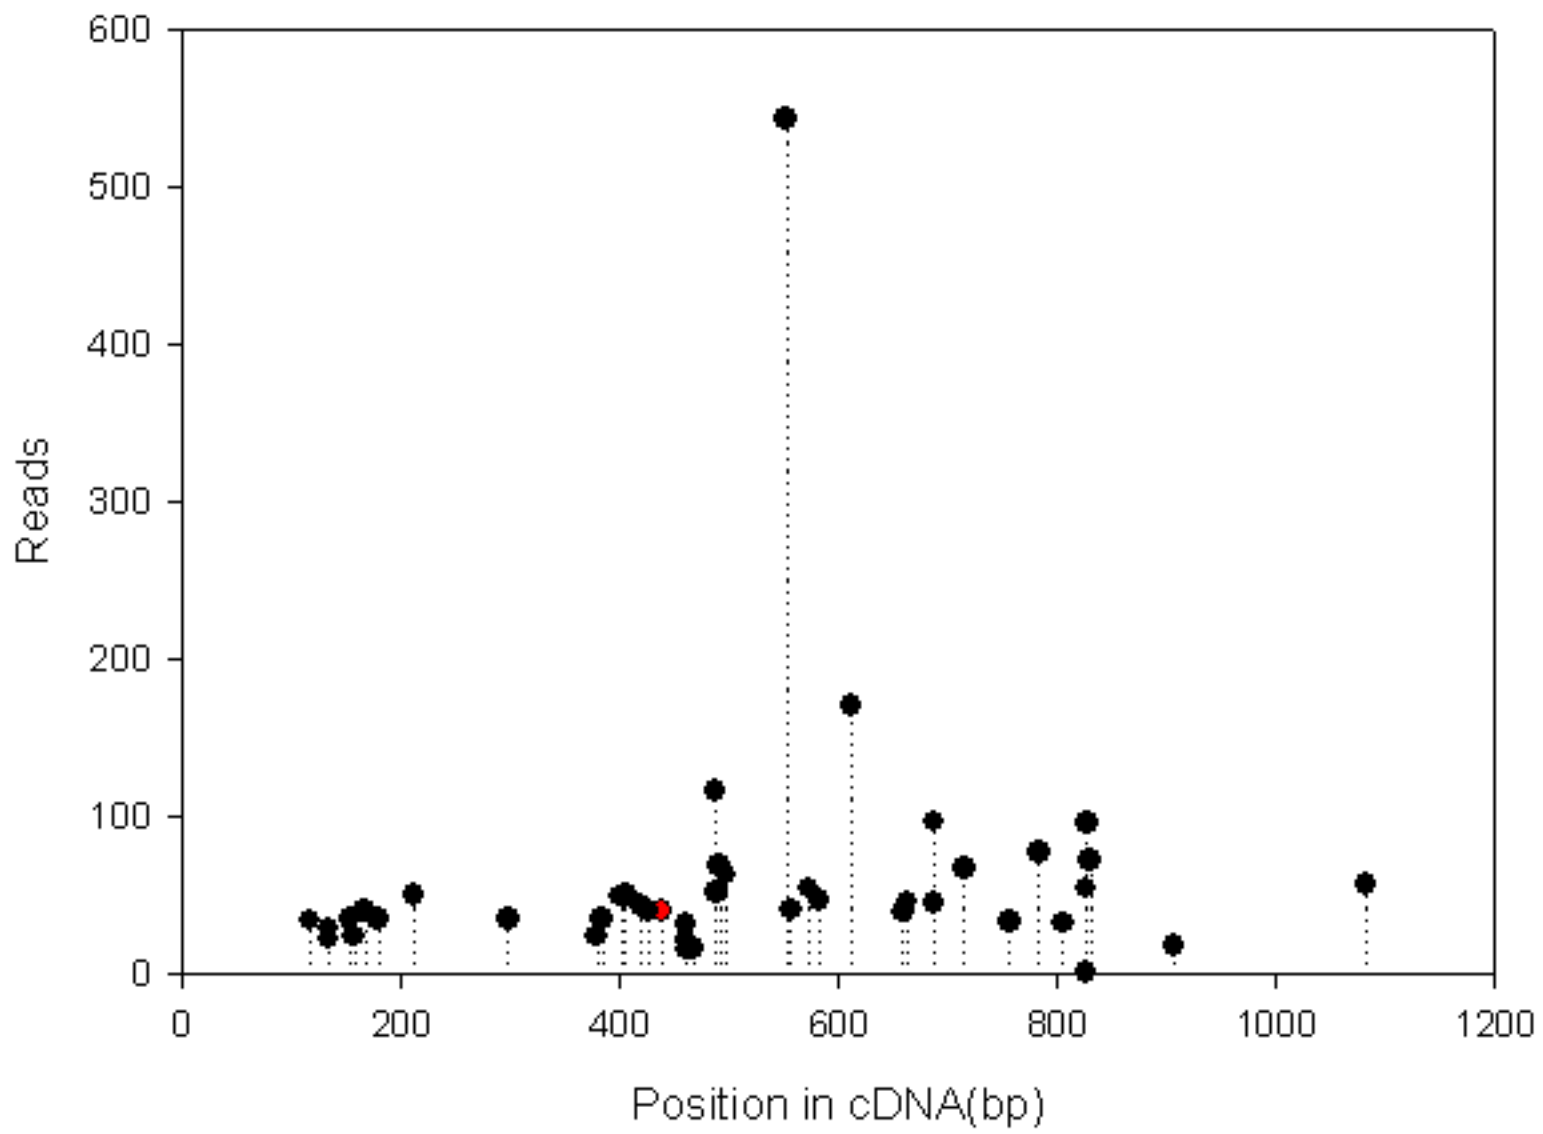

```

5' UUACAGCAUCCUCAAGA-UCCAGCAAC 3'      Cs2g21180.1
      : : : : : : : : : : : : : : :
3' ----UCGUAGUAGUUCUAAGGU----- 5'      Csi-miR172c.1
  
```



Csi-miR172c.1, target=Cs3g06140.1 gene=Cs3g06140

Category:1

Score=4.5

Cleavage Site=480

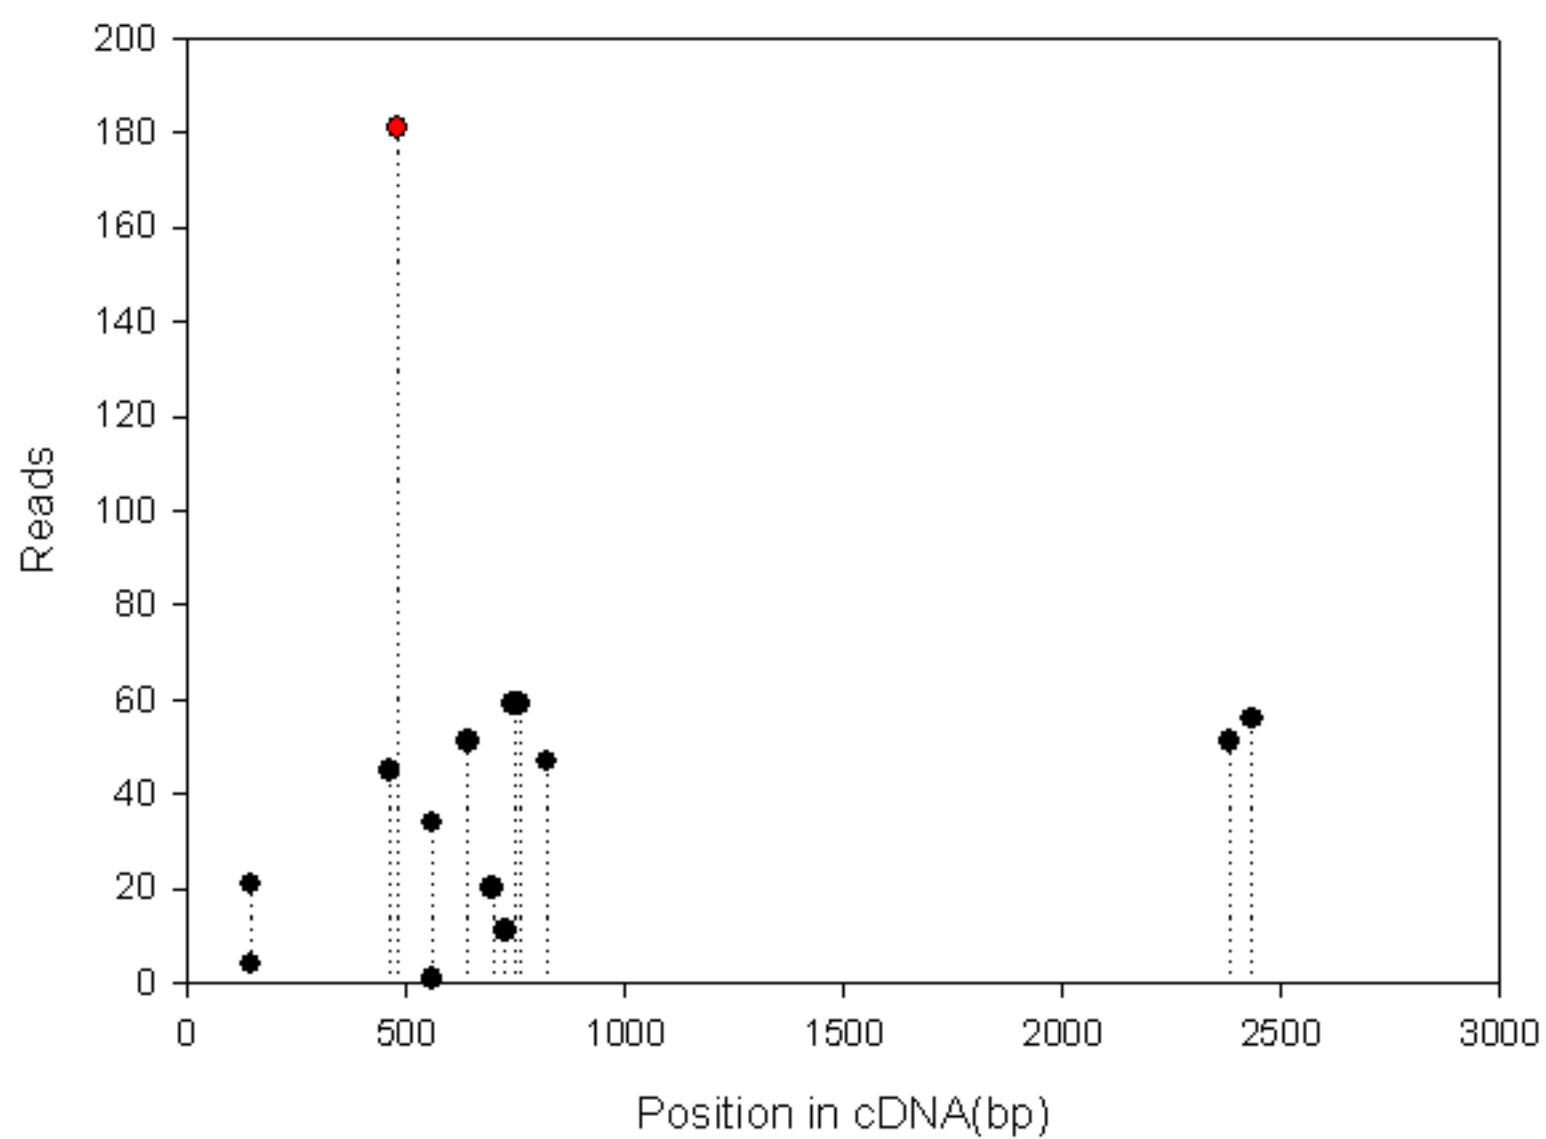

5' UGAGUCUGCCACCAUUAAGAUUCCUG 3'

Cs3g06140.1

- : : : : : : : : : : : :

3' -----UCGUAGUAGUUCUAAGGU- 5'

Csi-miR172c.1

Csi-miR172c.1, target=Cs7g19400.1 gene=Cs7g19400  
 Category:3  
 Score=5  
 Cleavage Site=1191

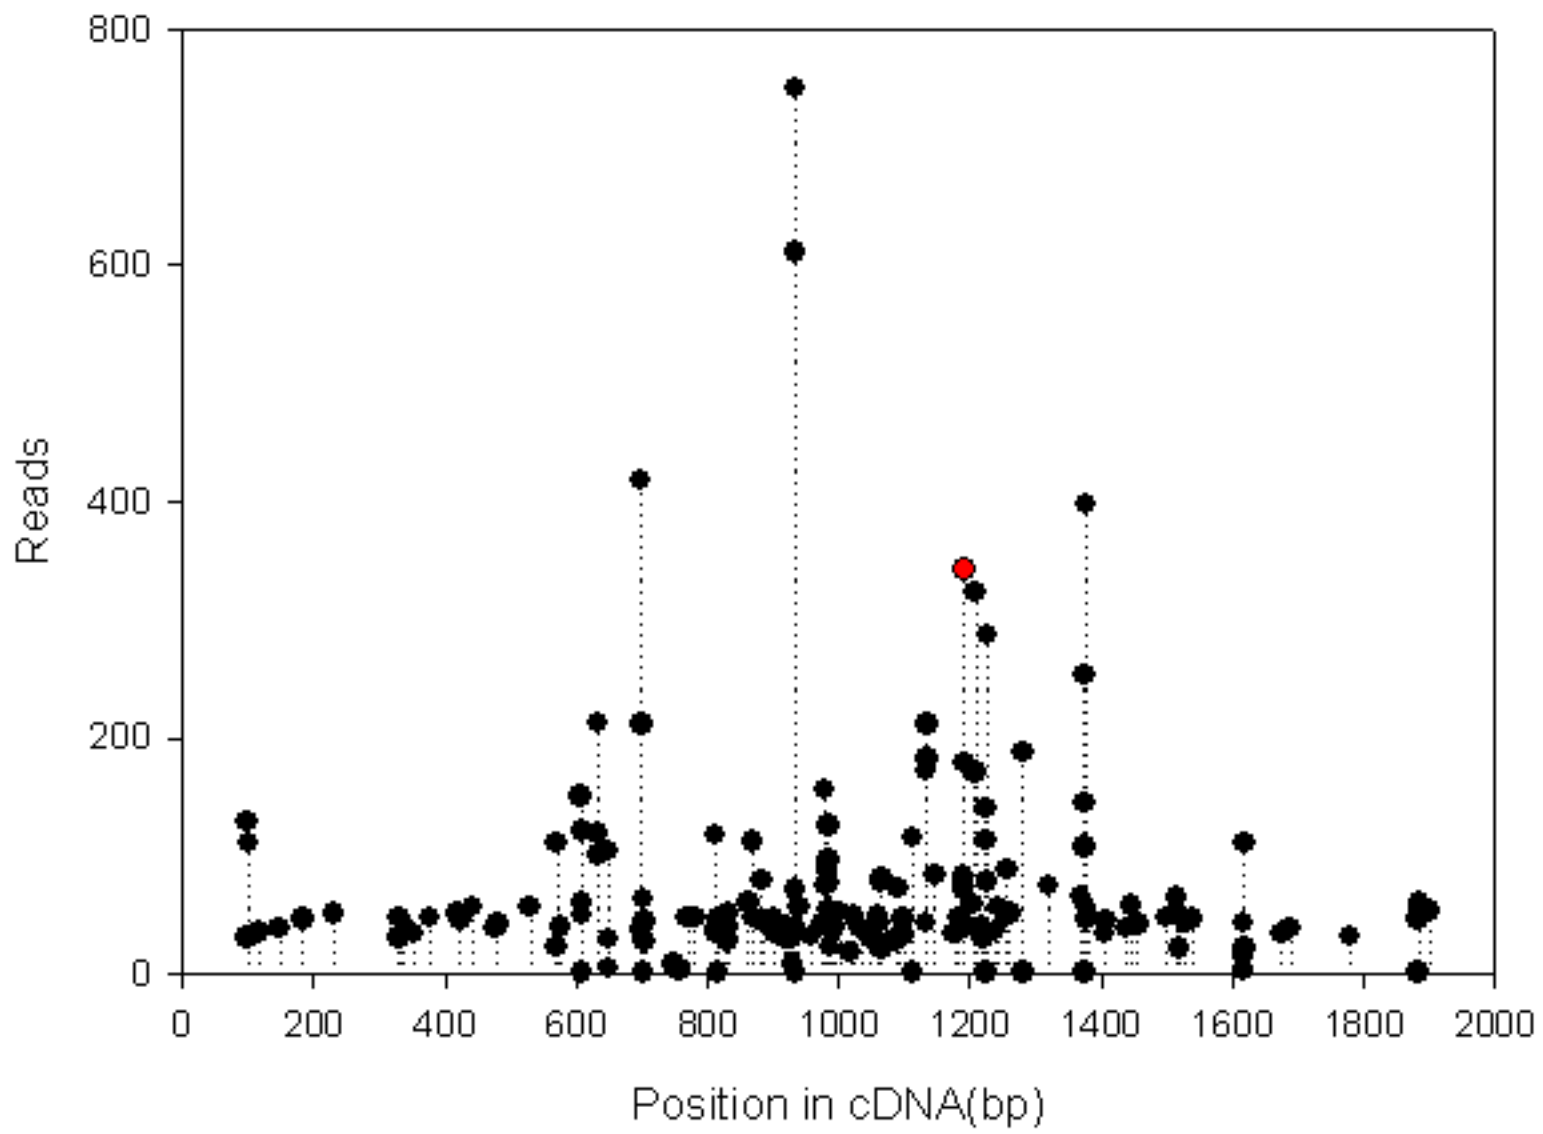

|    |                             |    |               |
|----|-----------------------------|----|---------------|
| 5' | GUAUUUGGAAGCCUCAGC-AGAUUCCA | 3' | Cs7g19400.1   |
|    | :::  :::  :  :::  :::  :::  |    |               |
| 3' | -----UCGUAGUAGUUCUAAGGU     | 5' | Csi-miR172c.1 |



Csi-miR172c.1, target=Orange1.1t00903.1 gene=Orange1.1t00903  
 Category:3  
 Score=5  
 Cleavage Site=329

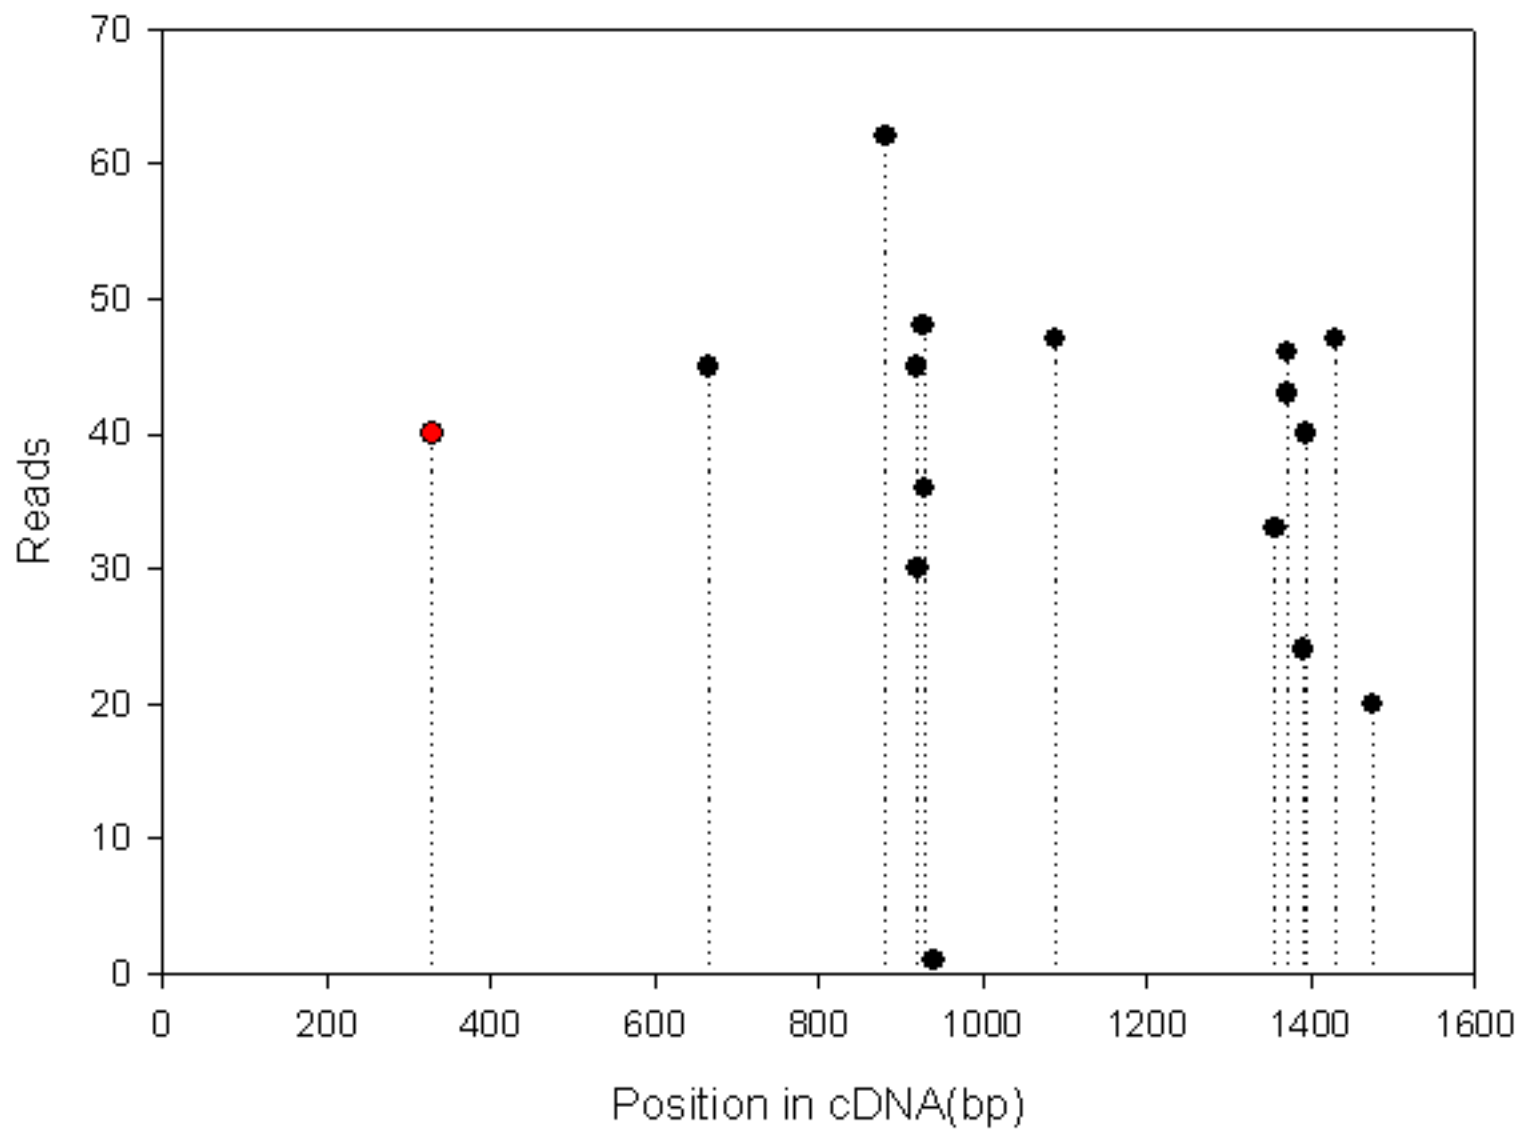

```

5' CAUCAUCAAGG-UCUAGUAGAAA 3'      Orange1.1t00903.1
   : : : : : : : : : : : : : :
3' -UCGUAGUAGUUCUAAGGU----- 5'    Csi-miR172c.1
  
```

Csi-miR172c.1, target=Orange1.1t04055.1 gene=Orange1.1t04055  
 Category:3  
 Score=2  
 Cleavage Site=2049

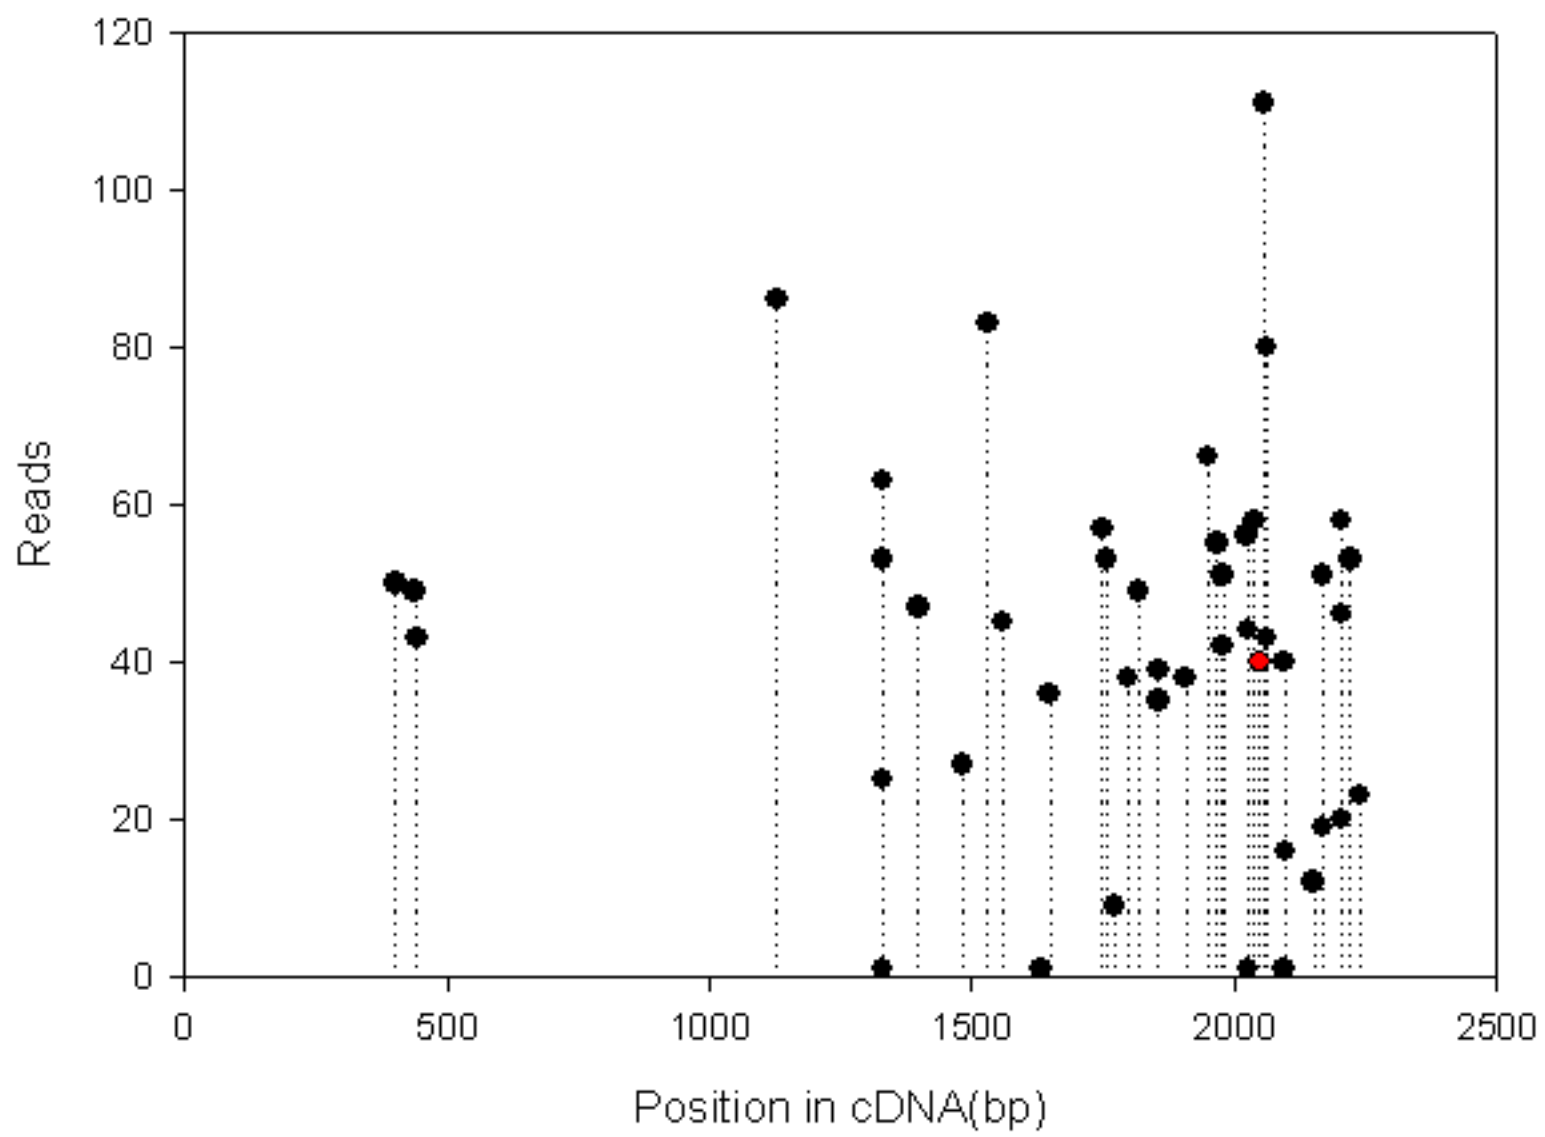

```

5' GCUGCAGCAUCAUCAGGAUUCCUCA 3'      Orange1.1t04055.1
      ::::::::::::::::::::
3' ----UCGUAGUAGUUCUAAGGU---- 5'      Csi-miR172c.1
  
```

Csi-miR172c.2, target=Orange1.1t04055.1 gene=Orange1.1t04055  
 Category:3  
 Score=2  
 Cleavage Site=2049



5' GCUGCAGCAUCAUCAGGAUCCCUCA 3'  
 :::::::::::::::::::::  
 3' -GACGUCGUAGUAGUUCUAAGGU--- 5'

Orange1.1t04055.1  
 Csi-miR172c.2

Csi-miR172d, target=Orange1.1t04055.1 gene=Orange1.1t04055  
 Category:3  
 Score=3  
 Cleavage Site=2049

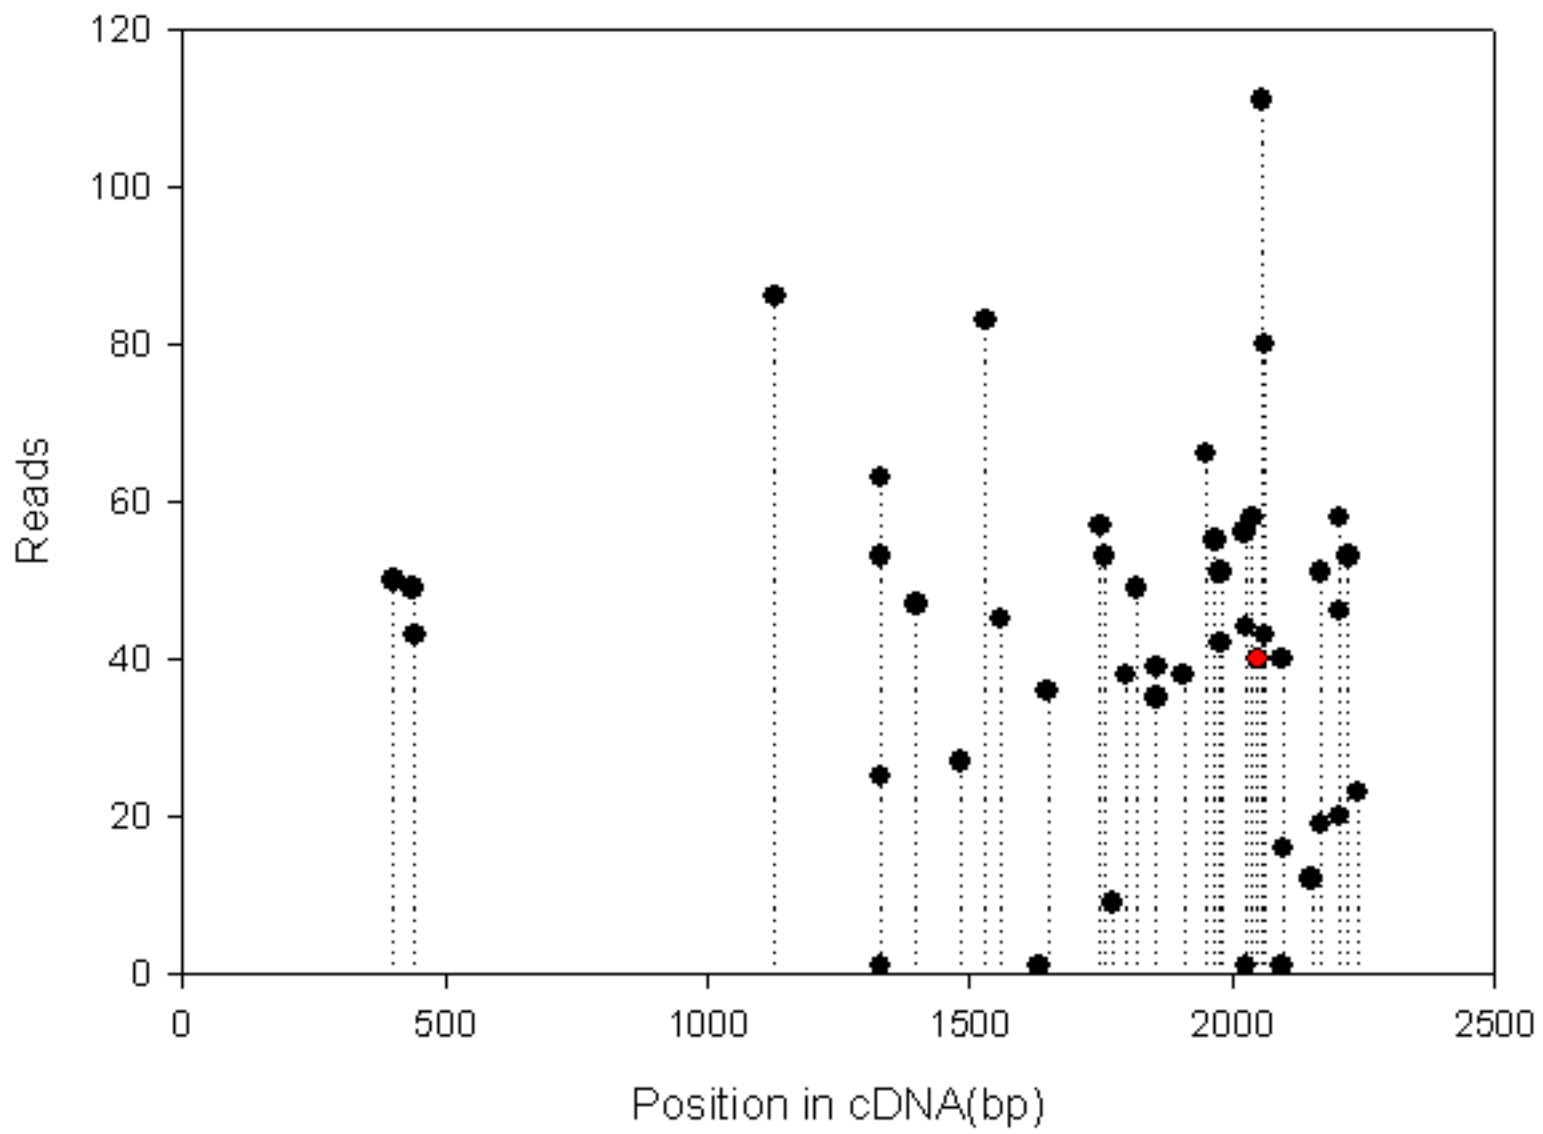

5' GCUGCAGCAUCAUCAGGAUCCCUCA 3'  
 :::::::::::::::::::::  
 3' -UACGUCGUAGUAGUUCUAAGA----- 5'

Orange1.1t04055.1  
 Csi-miR172d





Csi-miR172d-3p, target=Cs5g21000.1 gene=Cs5g21000  
 Category:3  
 Score=5  
 Cleavage Site=749

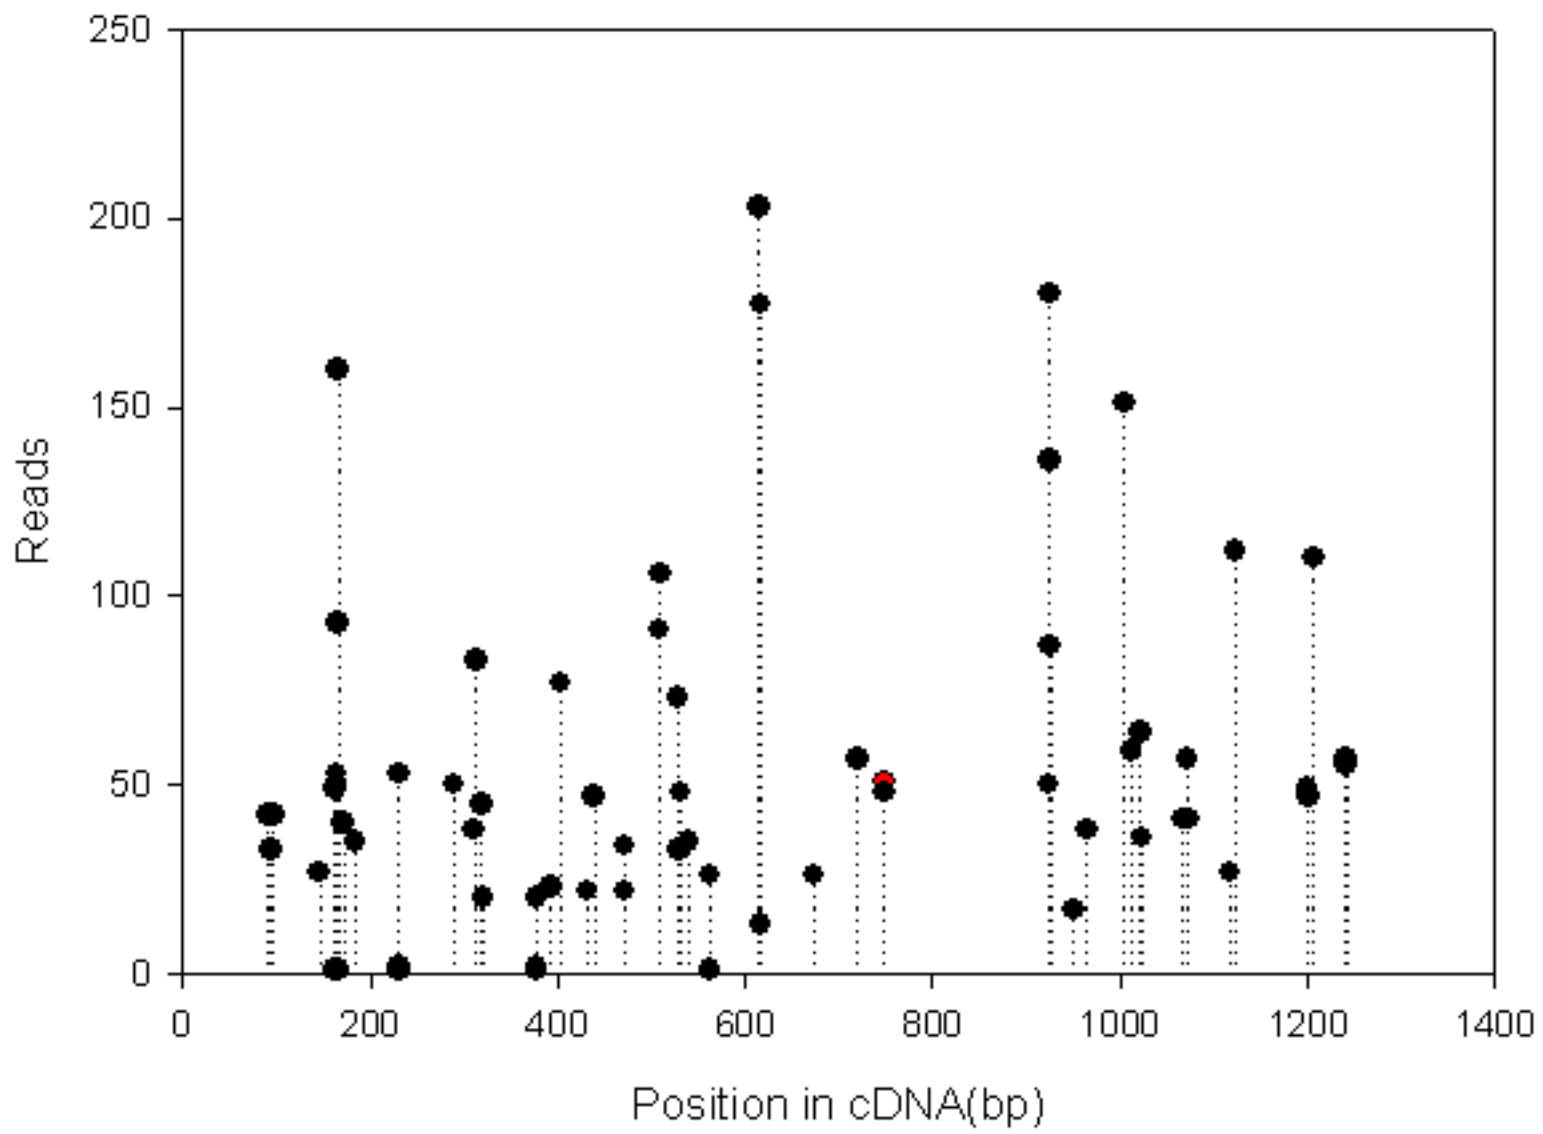

5' ACAAGUUUGGAU-UUGAUGAUGCUIUUU 3'  
 : : : : : : : : : : : : : : : : :  
 3' -----ACACUUAGAACUACUACGACG- 5'

Cs5g21000.1

Csi-miR172d-3p

Csi-miR172d-3p, target=Cs7g07030.1 gene=Cs7g07030  
 Category:3  
 Score=5  
 Cleavage Site=1972

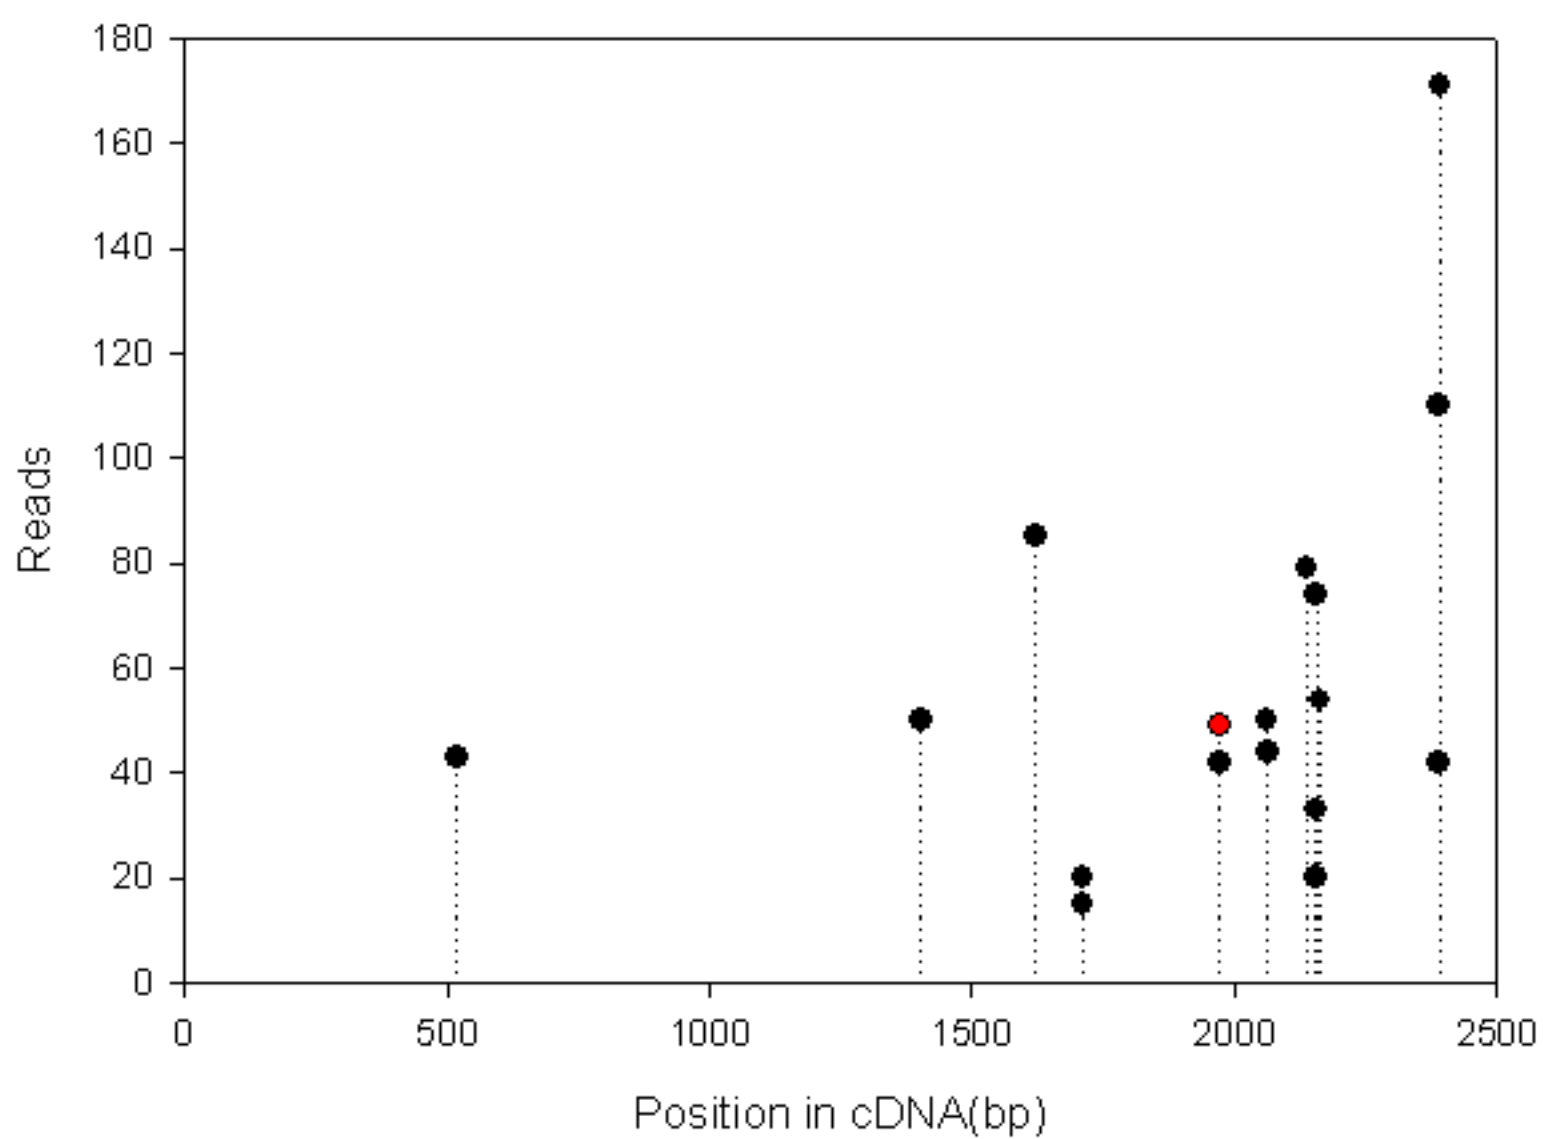

5' GAUGAUAUGAAUAUUGAUGAUCCUGA 3'  
 : : : : : : : : : : : : : : : : : :  
 3' -----ACACUUAGAACUACUACGACG 5'

Cs7g07030.1

Csi-miR172d-3p

Csi-miR172d-3p, target=Cs9g03090.1 gene=Cs9g03090  
 Category:2  
 Score=4.5  
 Cleavage Site=2765

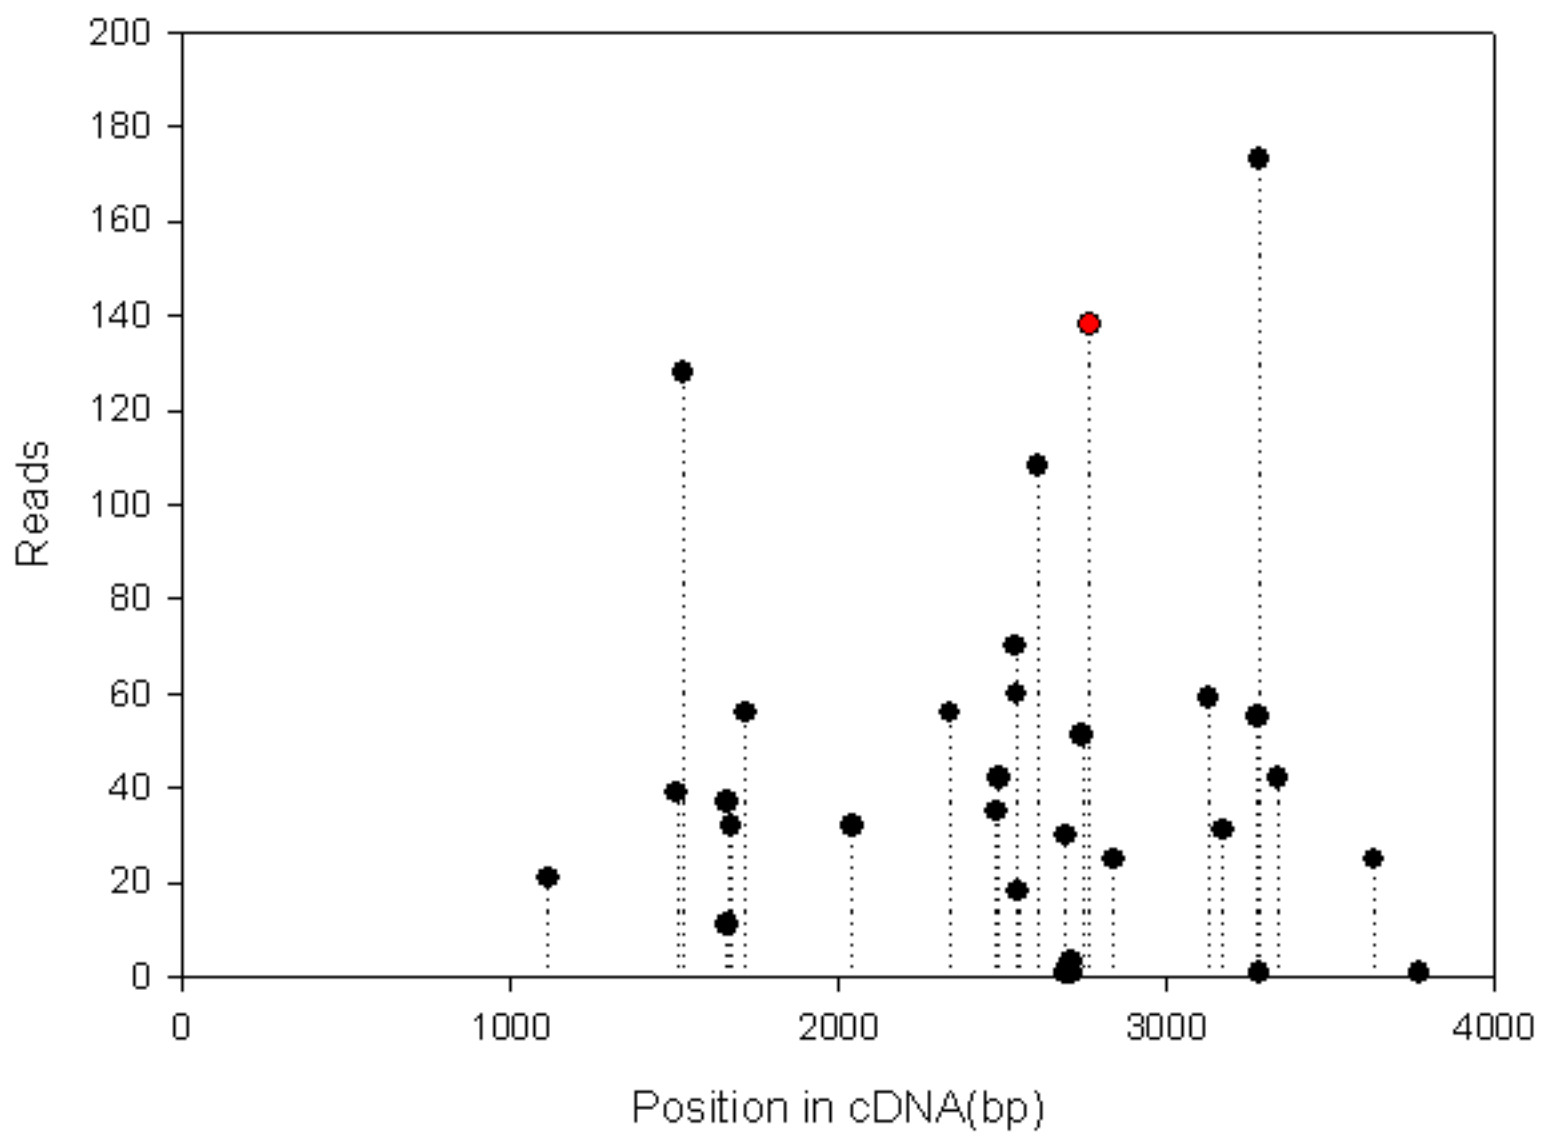

```

5' GCAAUCUGCAUUUUUGAUGAUGUUGC 3'      Cs9g03090.1
   : : : : : : : : : : : : : : :
3' ----ACAC-UUAGAACUACUACGACG 5'      Csi-miR172d-3p
  
```

Csi-miR172e.2, target=Cs1g23980.1 gene=Cs1g23980  
 Category:3  
 Score=5  
 Cleavage Site=1458

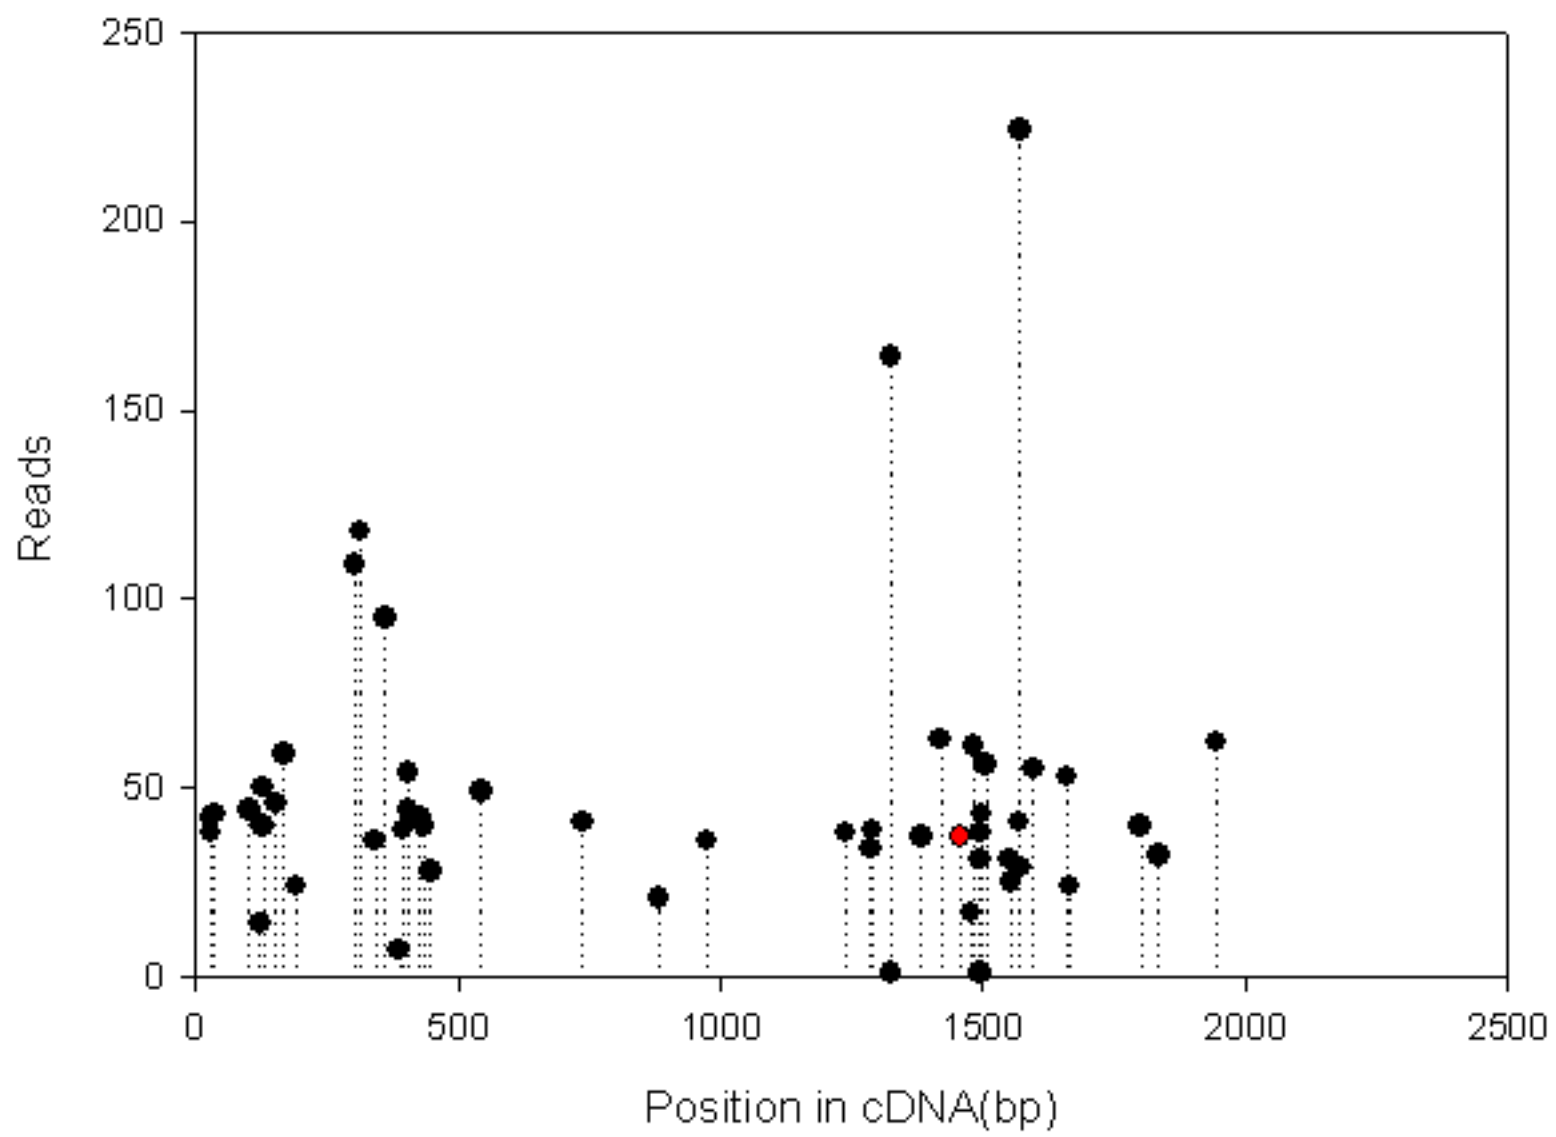

|                                    |               |
|------------------------------------|---------------|
| 5' AACUAUG-AGCAUCAUCGGGGUUAUGG 3'  | Cs1g23980.1   |
| ::: ::::::::::::::::::::           |               |
| 3' ----UACGUCGUAGUAGUUCUAAG---- 5' | Csi-miR172e.2 |

Csi-miR172e.2, target=Cs6g08190.1 gene=Cs6g08190  
 Category:2  
 Score=5  
 Cleavage Site=1095

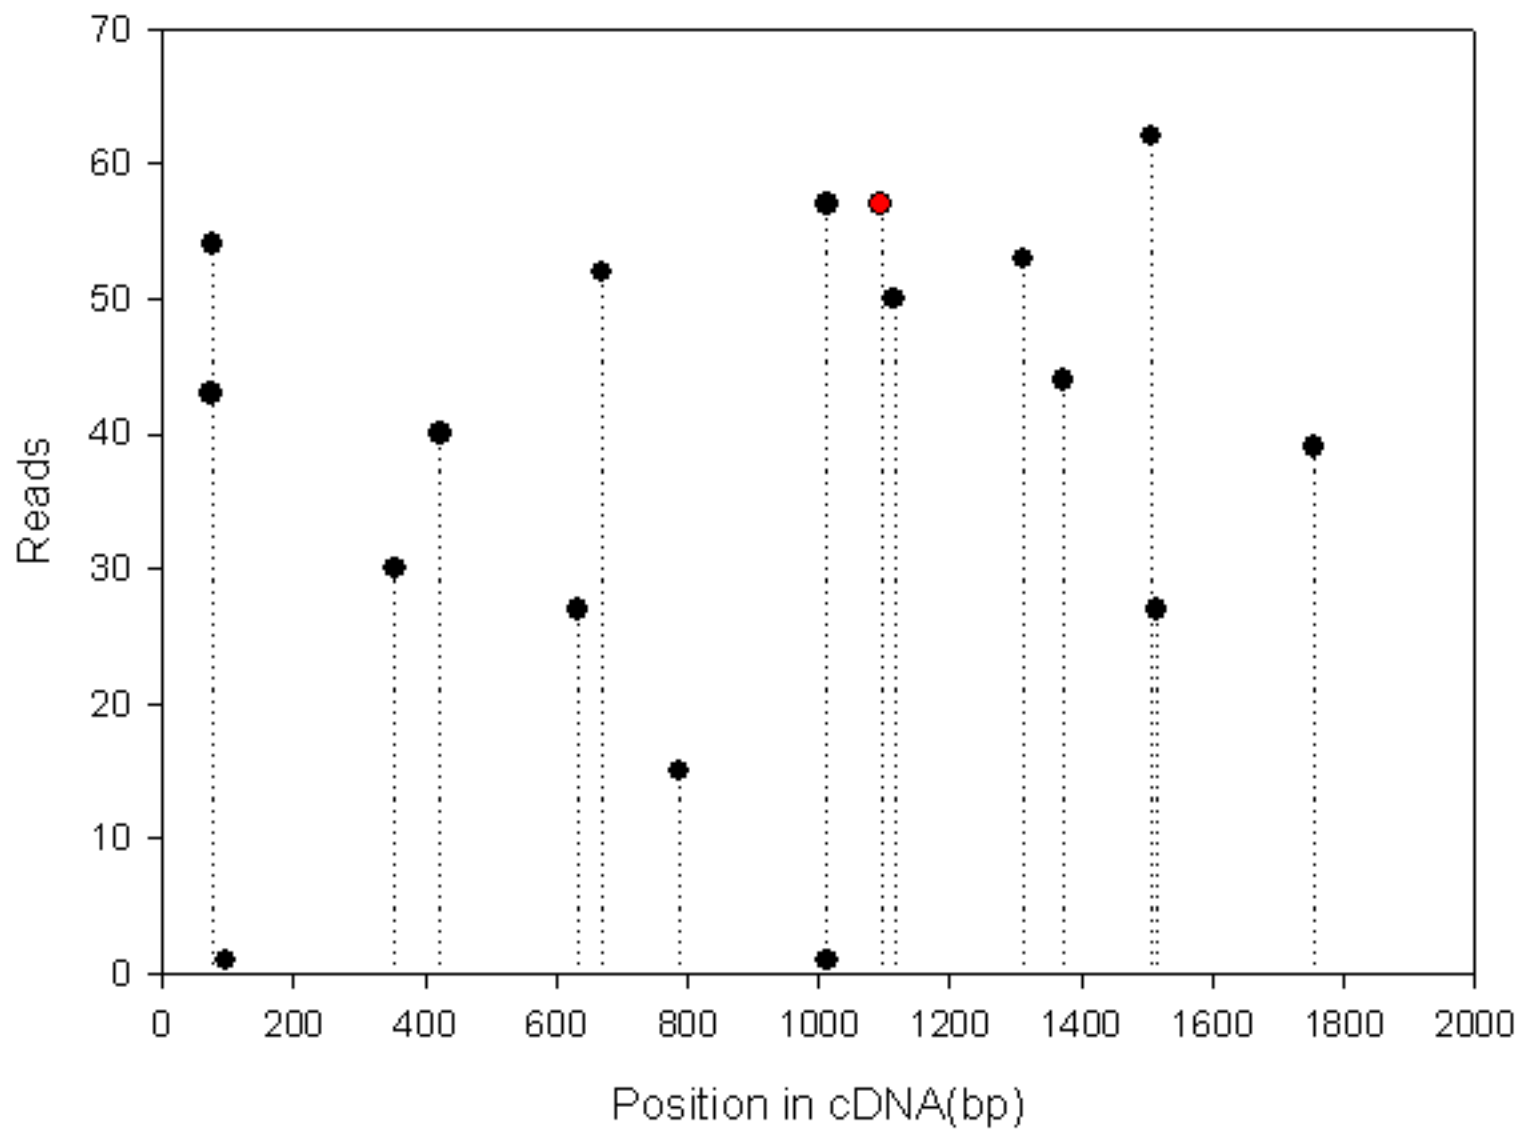

5' UCUGGGAAGCAGCAUGAUCAAGAAUC 3'  
 : : : : : : : : : : : : : : : : : :  
 3' -----UACGUCGUAGUAGUUCUAAG 5'

Cs6g08190.1

Csi-miR172e.2



Csi-miR172k, target=Cs4g17900.1 gene=Cs4g17900  
 Category:3  
 Score=5  
 Cleavage Site=454

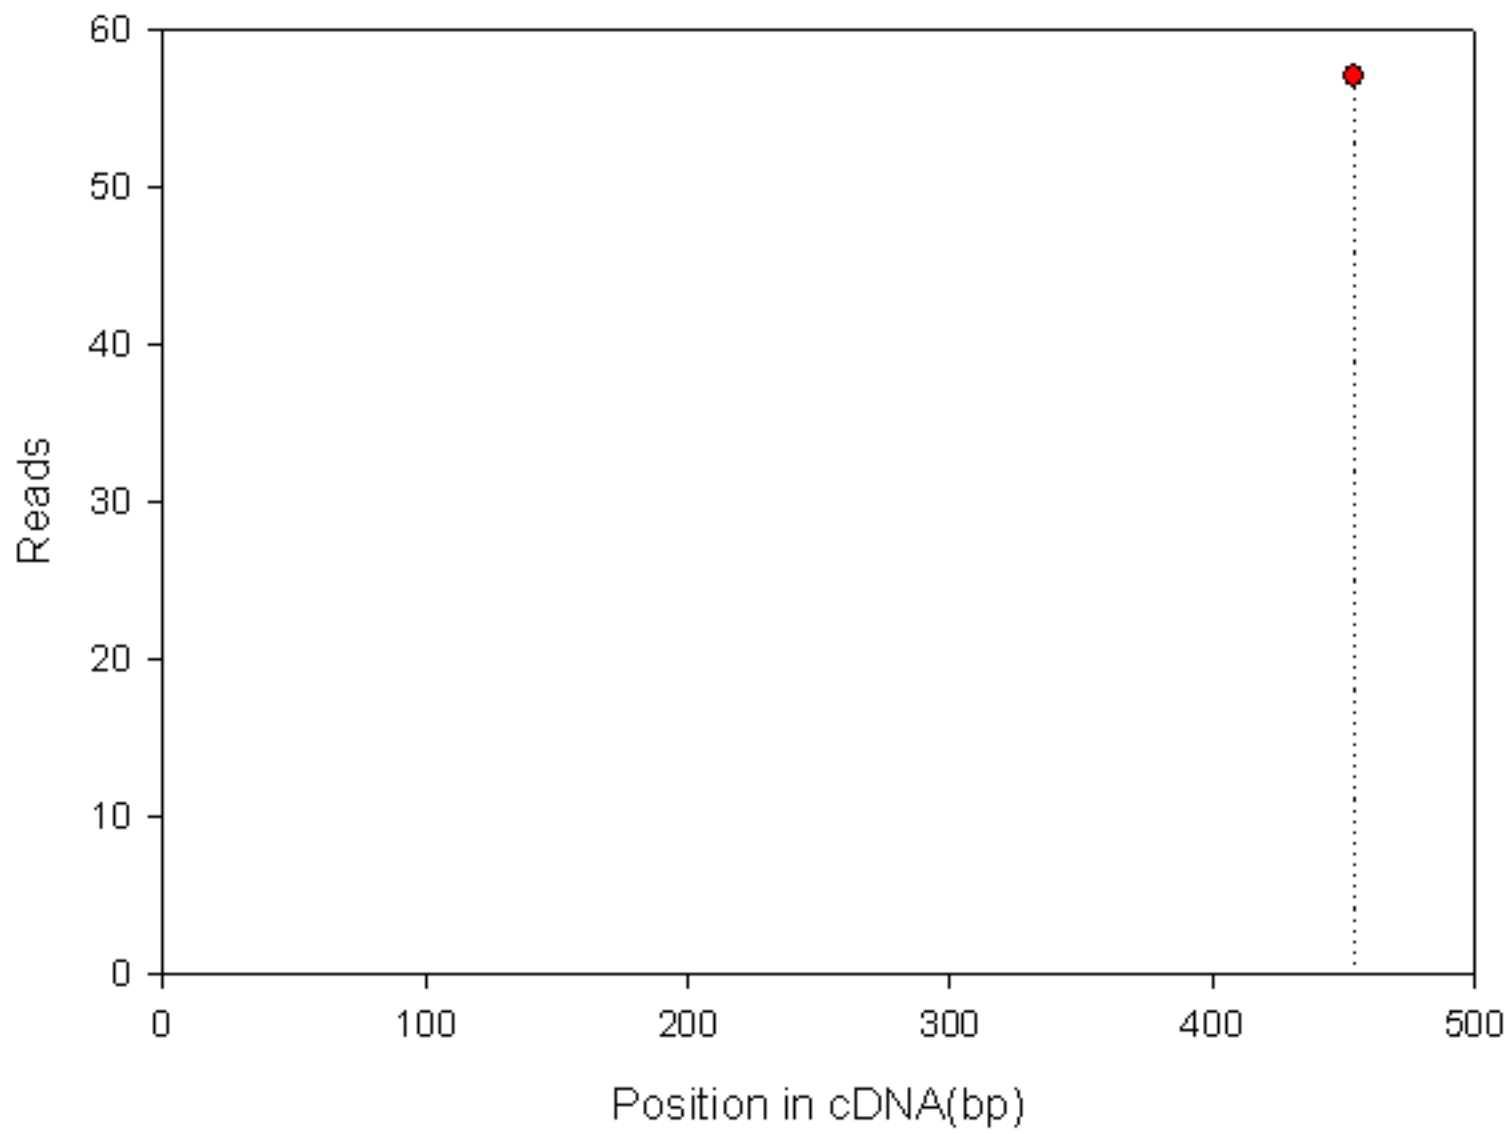

```

5' UUCAU-CAUCAUCUUCAAGGUUCAAGA 3'      Cs4g17900.1
   :: :: :::: ::::: :::::
3' ---UACGUCGUAGUAGUUCUAAGU--- 5'      Csi-miR172k
  
```

Csi-miR172k, target=Orange1.1t00603.1 gene=Orange1.1t00603

Category:3

Score=5

Cleavage Site=1075

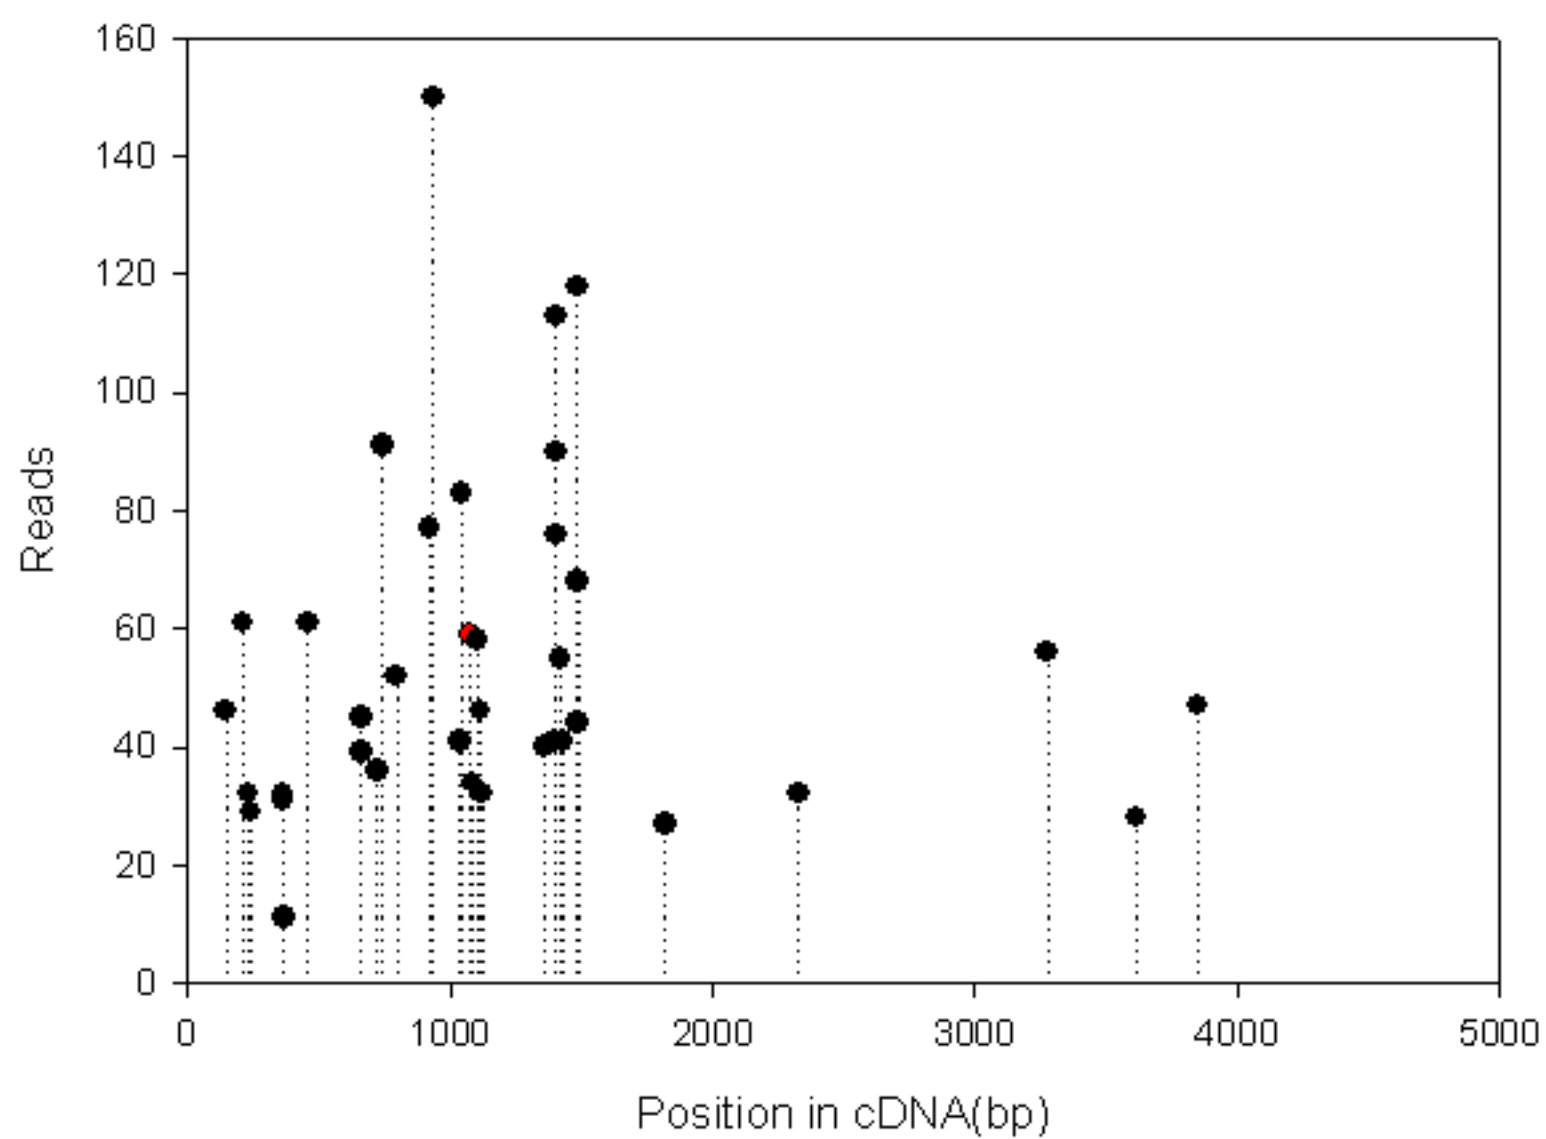

5' CGAUGCACCAACAUAAGUAUUCAAA 3'

Orange1.1t00603.1

..... :: .....:..... :::::

3' --UACGUCGUAGUAGUUC-UAAGU-- 5'

Csi-miR172k



Csi-miR172k, target=Orange1.1t04055.1 gene=Orange1.1t04055

Category:3

Score=3

Cleavage Site=2049

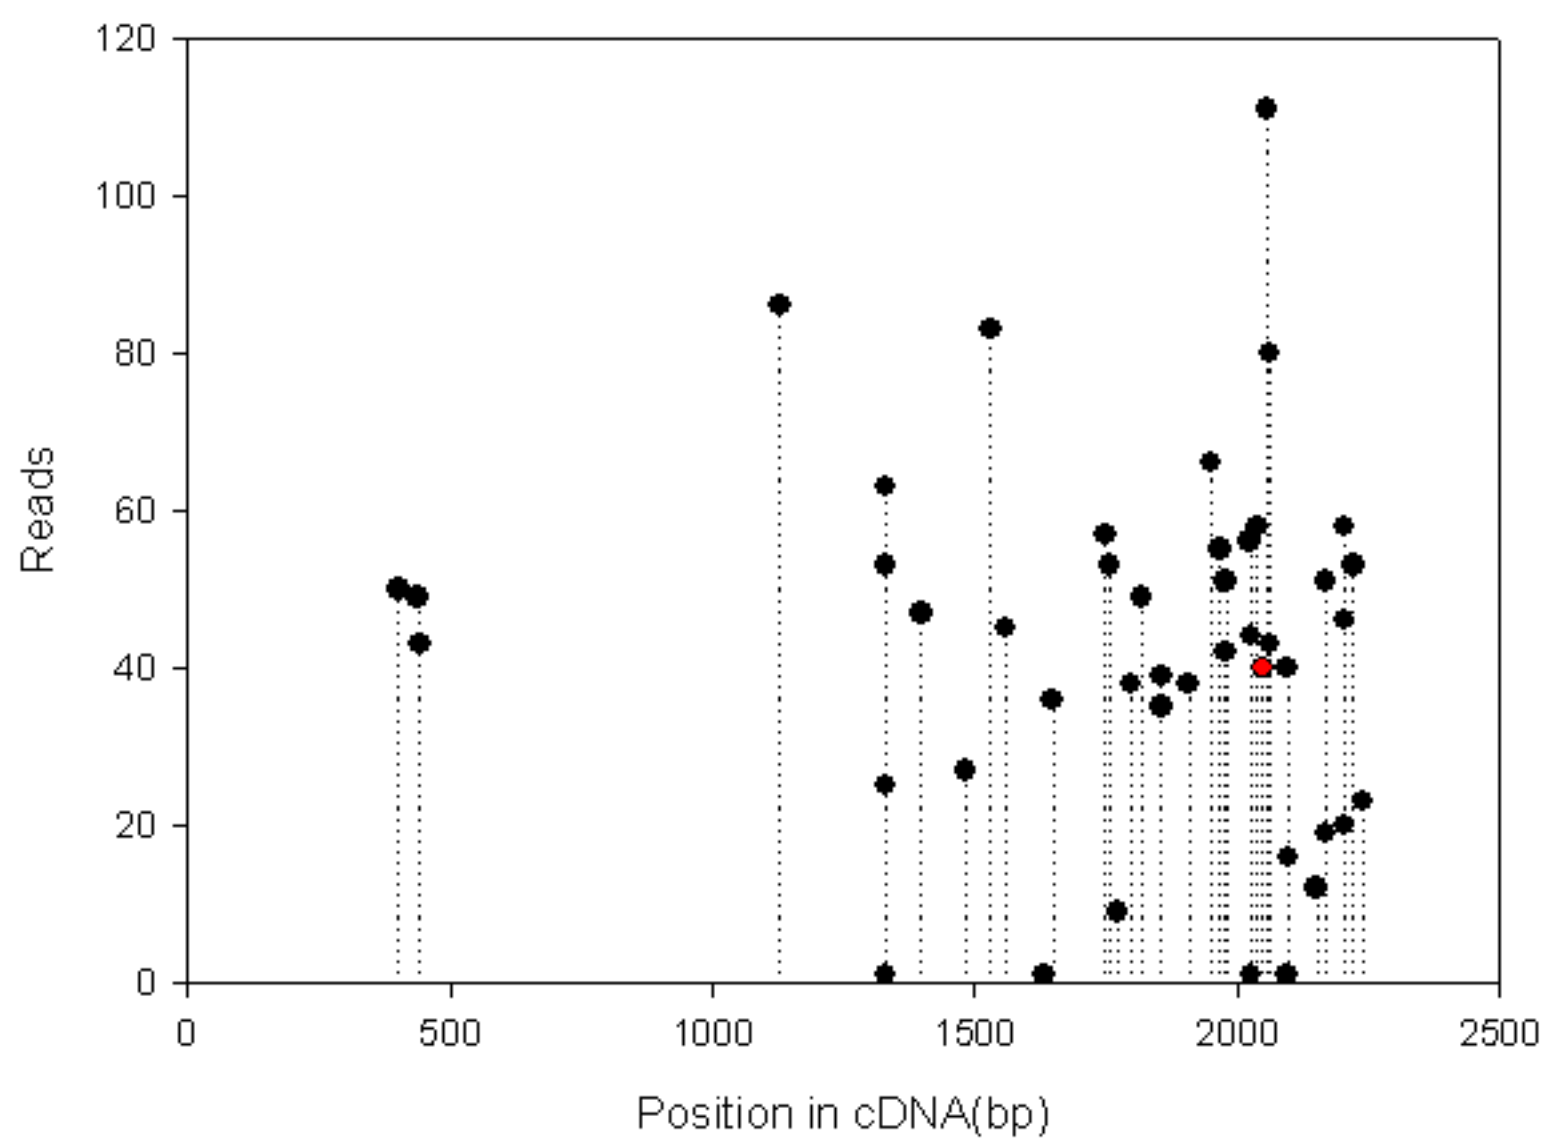

5' GCUGCAGCAUCAUCAGGAUCCCUCA 3'

.....

3' -UACGUCGUAGUAGUUCUAAGU---- 5'

Orange1.1t04055.1

Csi-miR172k

Csi-miR2118.1, target=Orange1.1t00557.1 gene=Orange1.1t00557  
 Category:2  
 Score=4  
 Cleavage Site=131

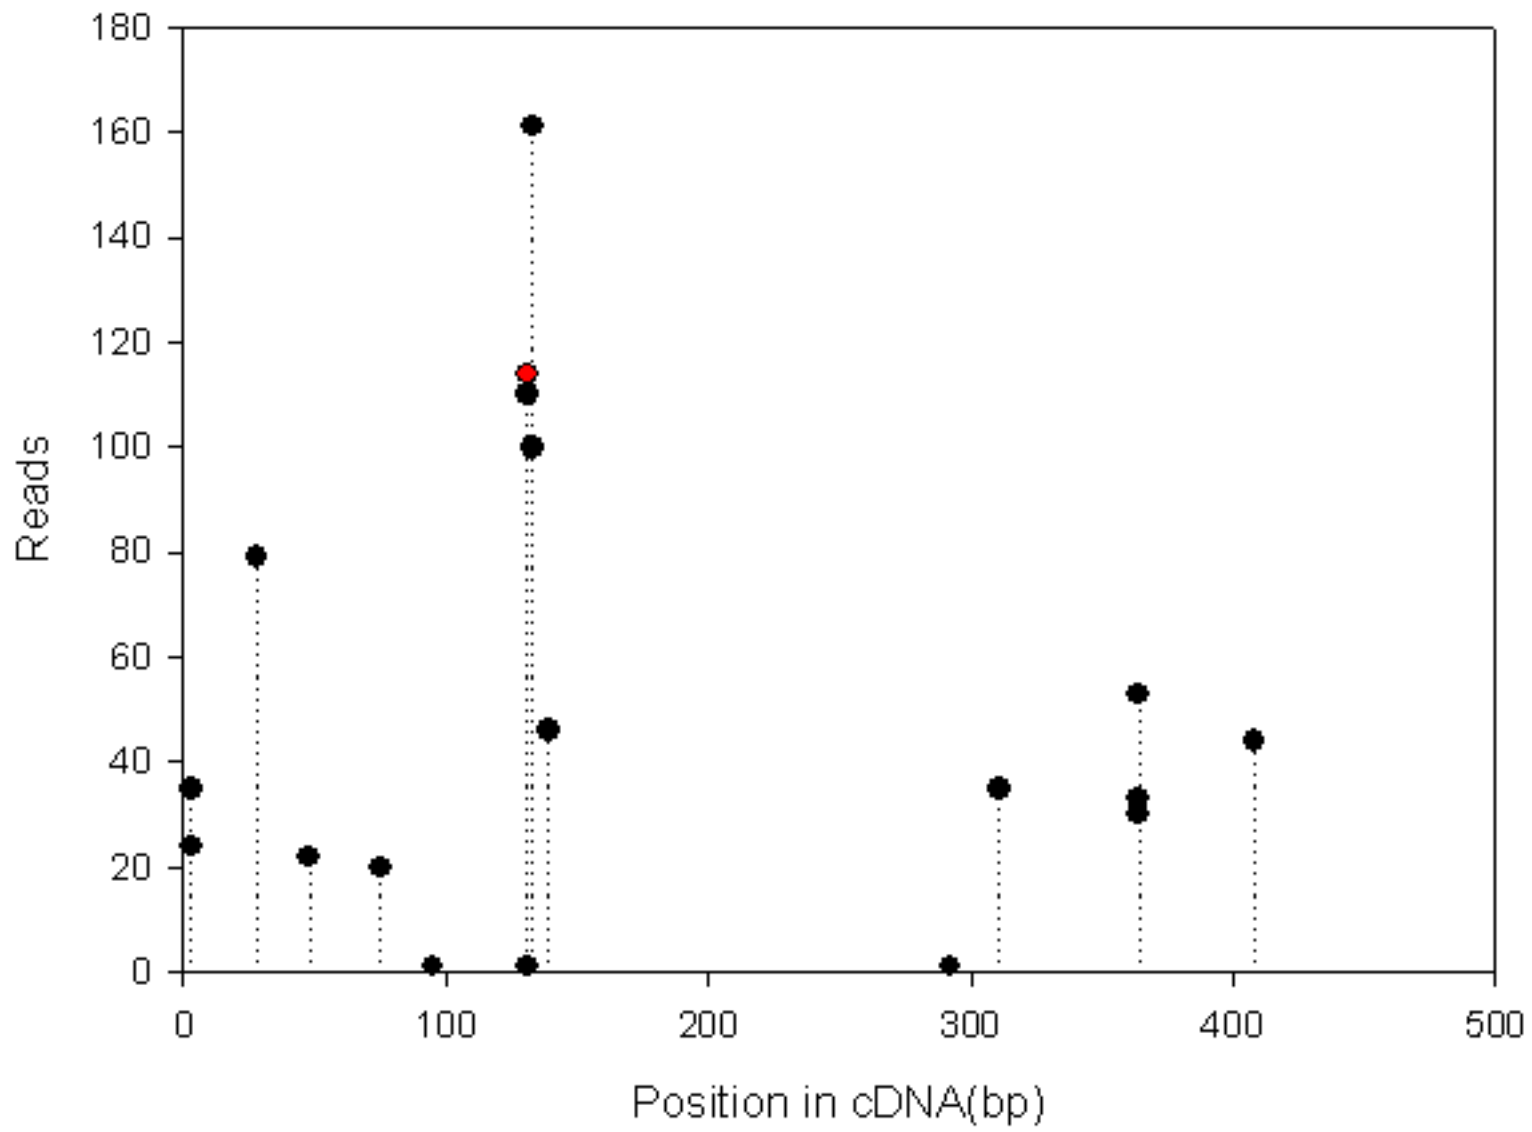

```

5' AAGACAUGGGUGGCAUAGGUCACAUC 3'      Orange1.1t00557.1
   :::  :::::::::::::::::::::  :
3' UCCCUUACCCACCGUAUCCAUU----- 5'    Csi-miR2118.1
  
```

Csi-miR2118.2, target=Cs3g12720.1 gene=Cs3g12720  
 Category:1  
 Score=5  
 Cleavage Site=547

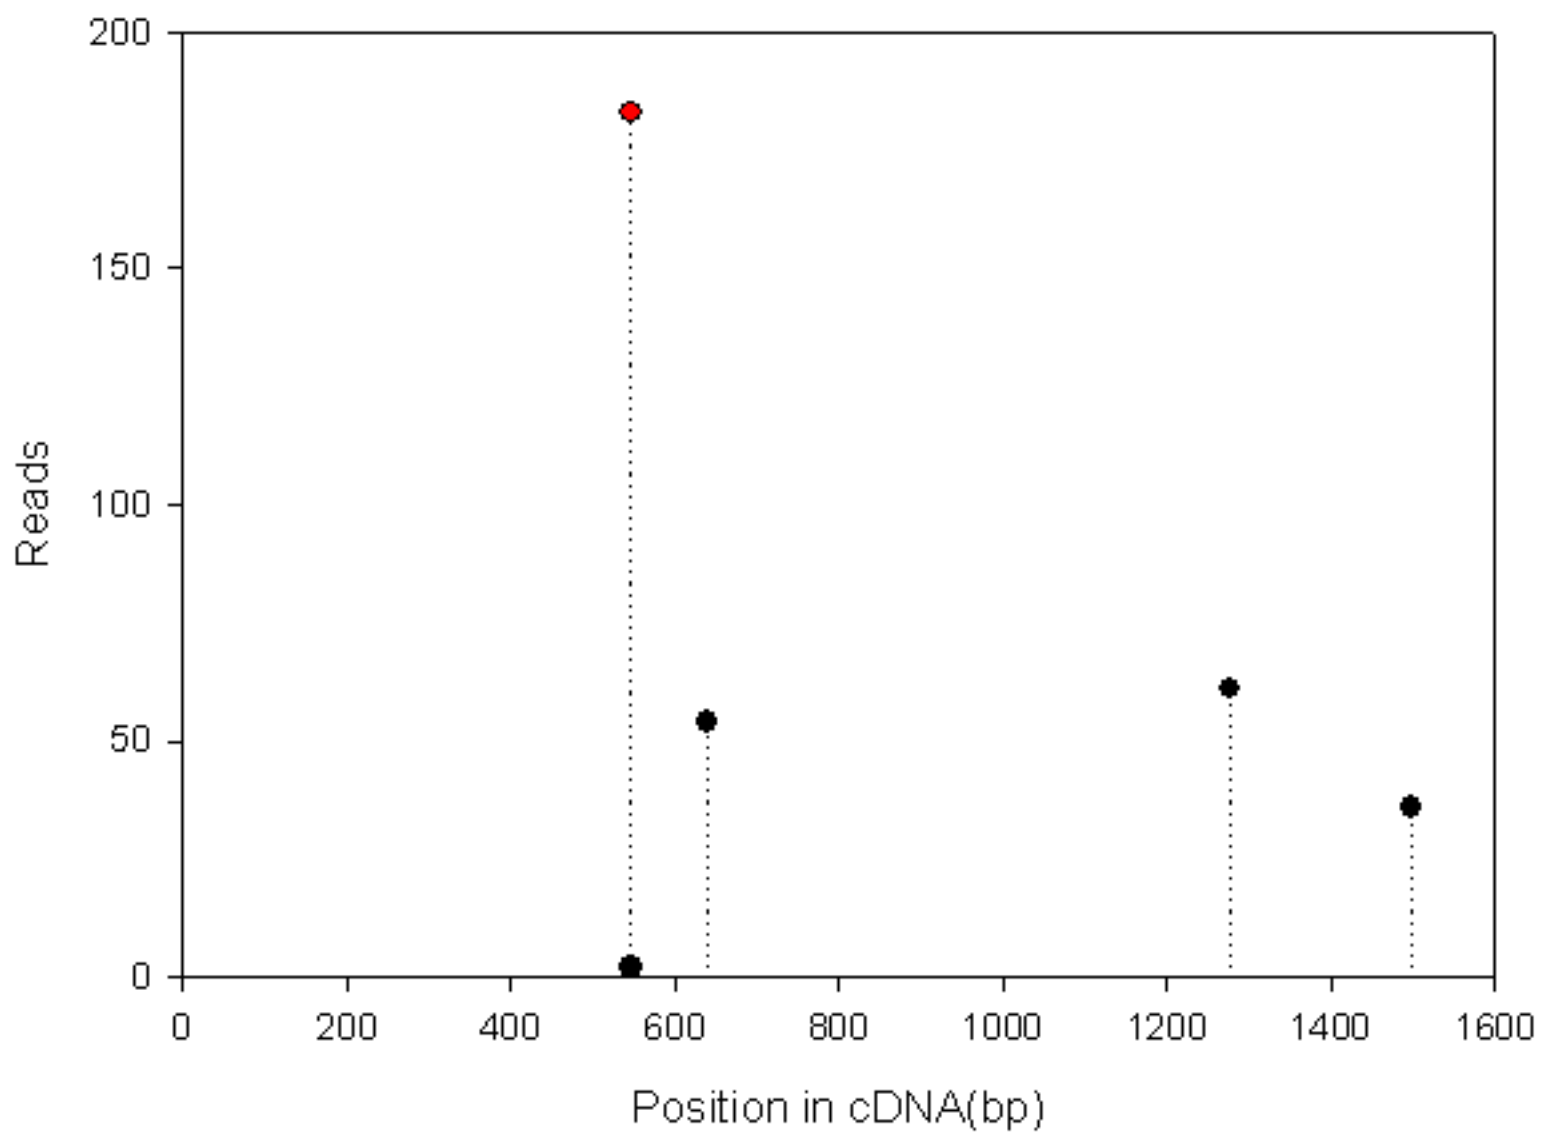

```

5' GGCAUGGGUGGCAUUGGAAAGACAAC 3'      Cs3g12720.1
  :: :::::::::::::: :: ::
3' CCUUACCCACCGUAUCCAUU----- 5'      Csi-miR2118.2
  
```

Csi-miR2118.2, target=Cs3g12760.1 gene=Cs3g12760  
 Category:1  
 Score=4.5  
 Cleavage Site=1037

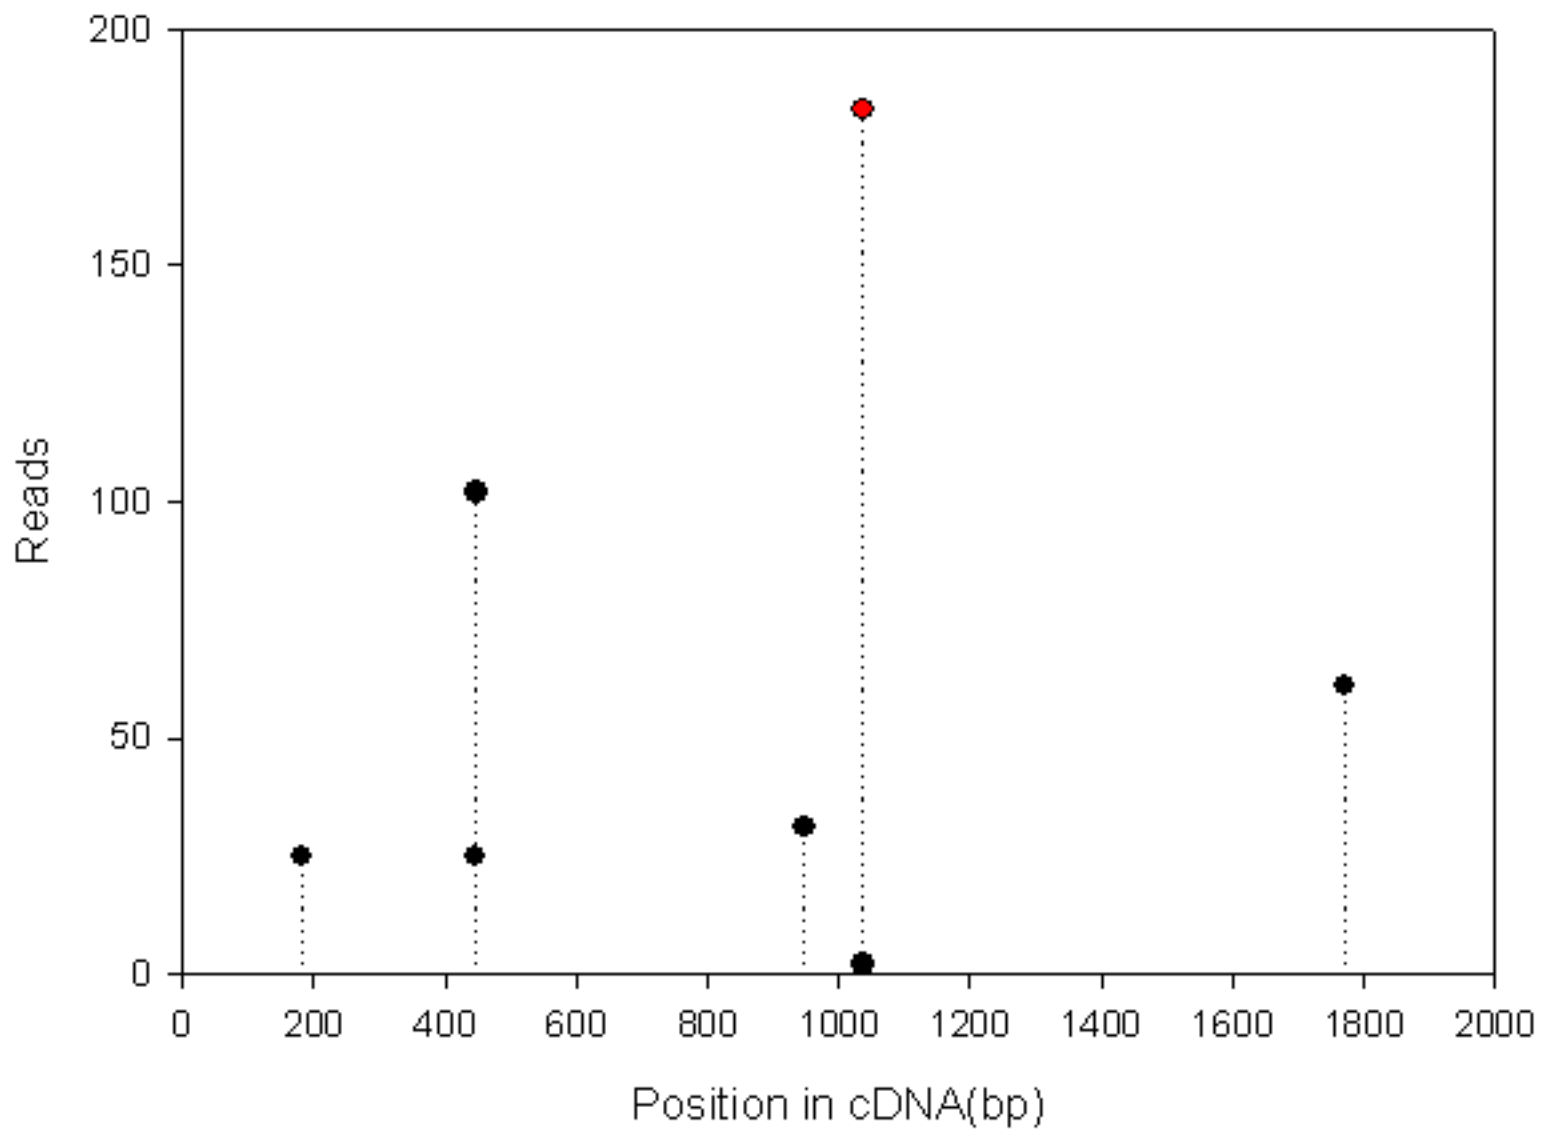

```

5' GGAUGGGUGGCAUUGGAAAGACAAC 3'      Cs3g12760.1
   .....: :
3' CCUACCCACCGUAUCCAU----- 5'      Csi-miR2118.2
  
```

Csi-miR2118.2, target=Cs3g12850.1 gene=Cs3g12850  
 Category:1  
 Score=4.5  
 Cleavage Site=547

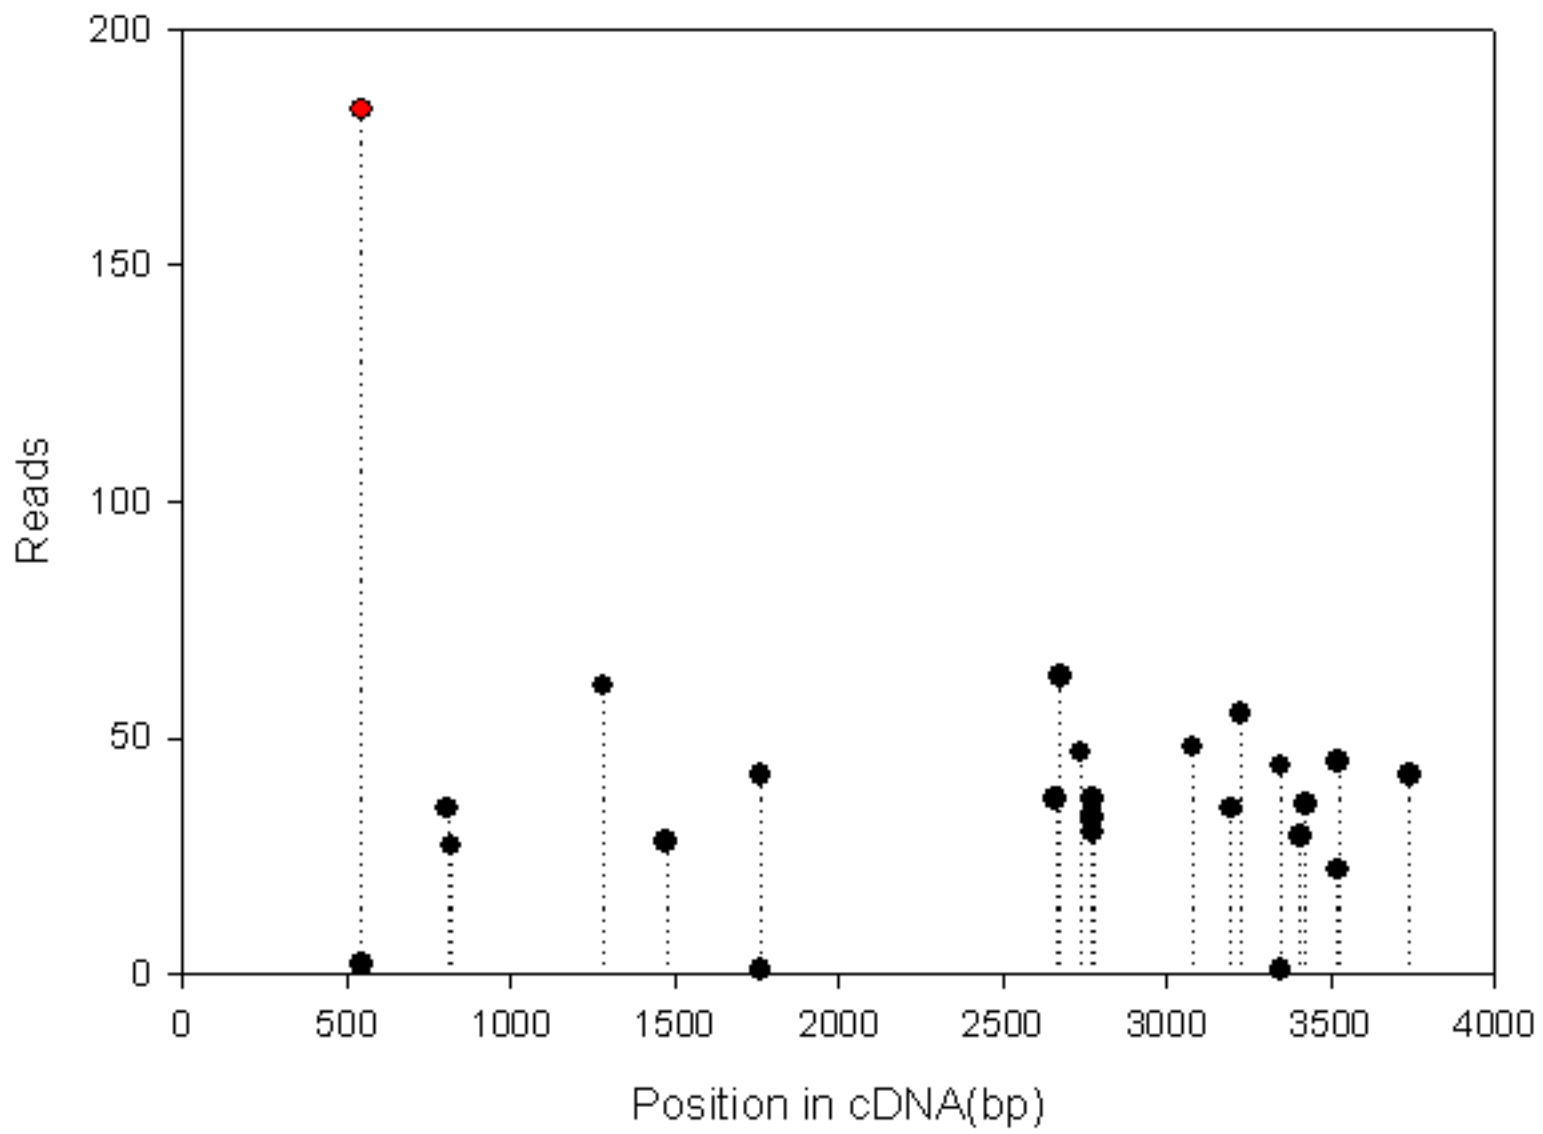

```

5' GGAUGGGUGGCAUUGGAAAGACAAC 3'      Cs3g12850.1
   .....: :
3' CCUACCCACCGUAUCCAU----- 5'      Csi-miR2118.2

```

Csi-miR2118.2, target=Cs3g13320.1 gene=Cs3g13320  
 Category:1  
 Score=4.5  
 Cleavage Site=643

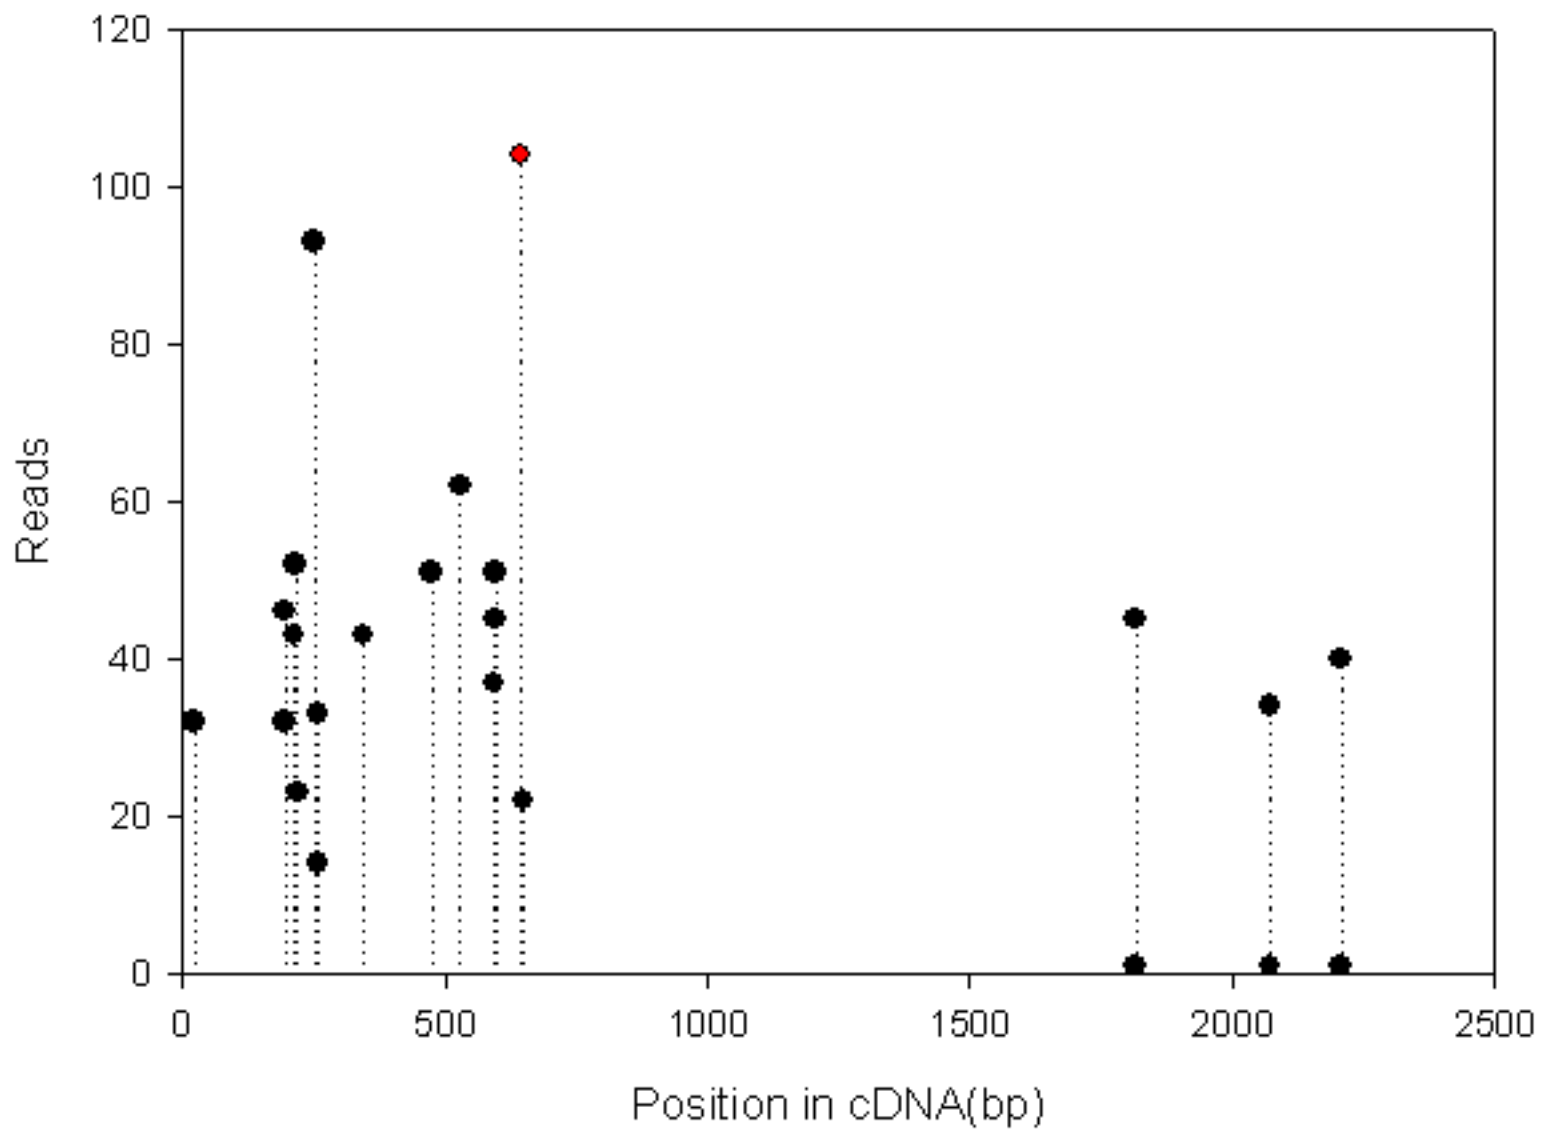

```

5' GGGAUGGGGGGCAUAGGCAAAACUAC 3'      Cs3g13320.1
   .....
3' CCUACCCACCGUAUCCAUU----- 5'      Csi-miR2118.2
  
```

Csi-miR2118.2, target=Cs3g13340.1 gene=Cs3g13340  
 Category:2  
 Score=4.5  
 Cleavage Site=702

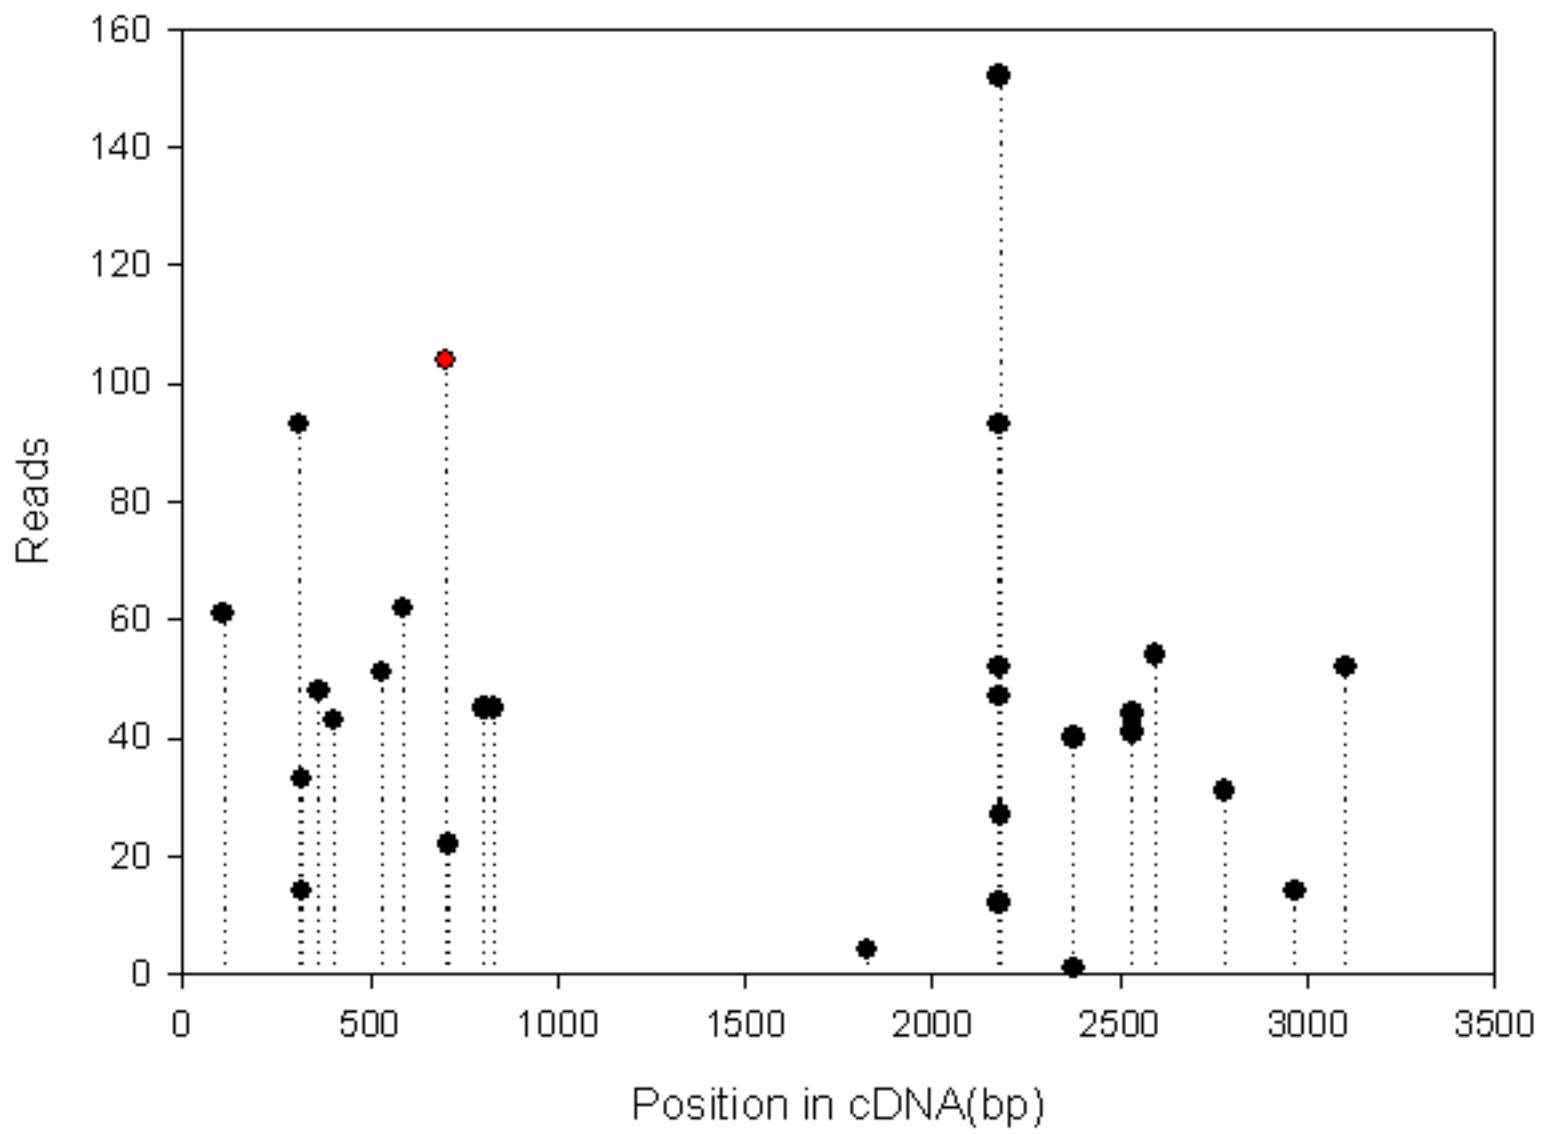

```

5' GGGAUAGGGGGGCAUAGGCAAACUAC 3'      Cs3g13340.1
   ::::::::::: ::::::::::: ::
3' CCUACCCACCGUAUCCAUU----- 5'      Csi-miR2118.2

```

Csi-miR2118.2, target=Cs3g13390.1 gene=Cs3g13390

Category:1

Score=4.5

Cleavage Site=800

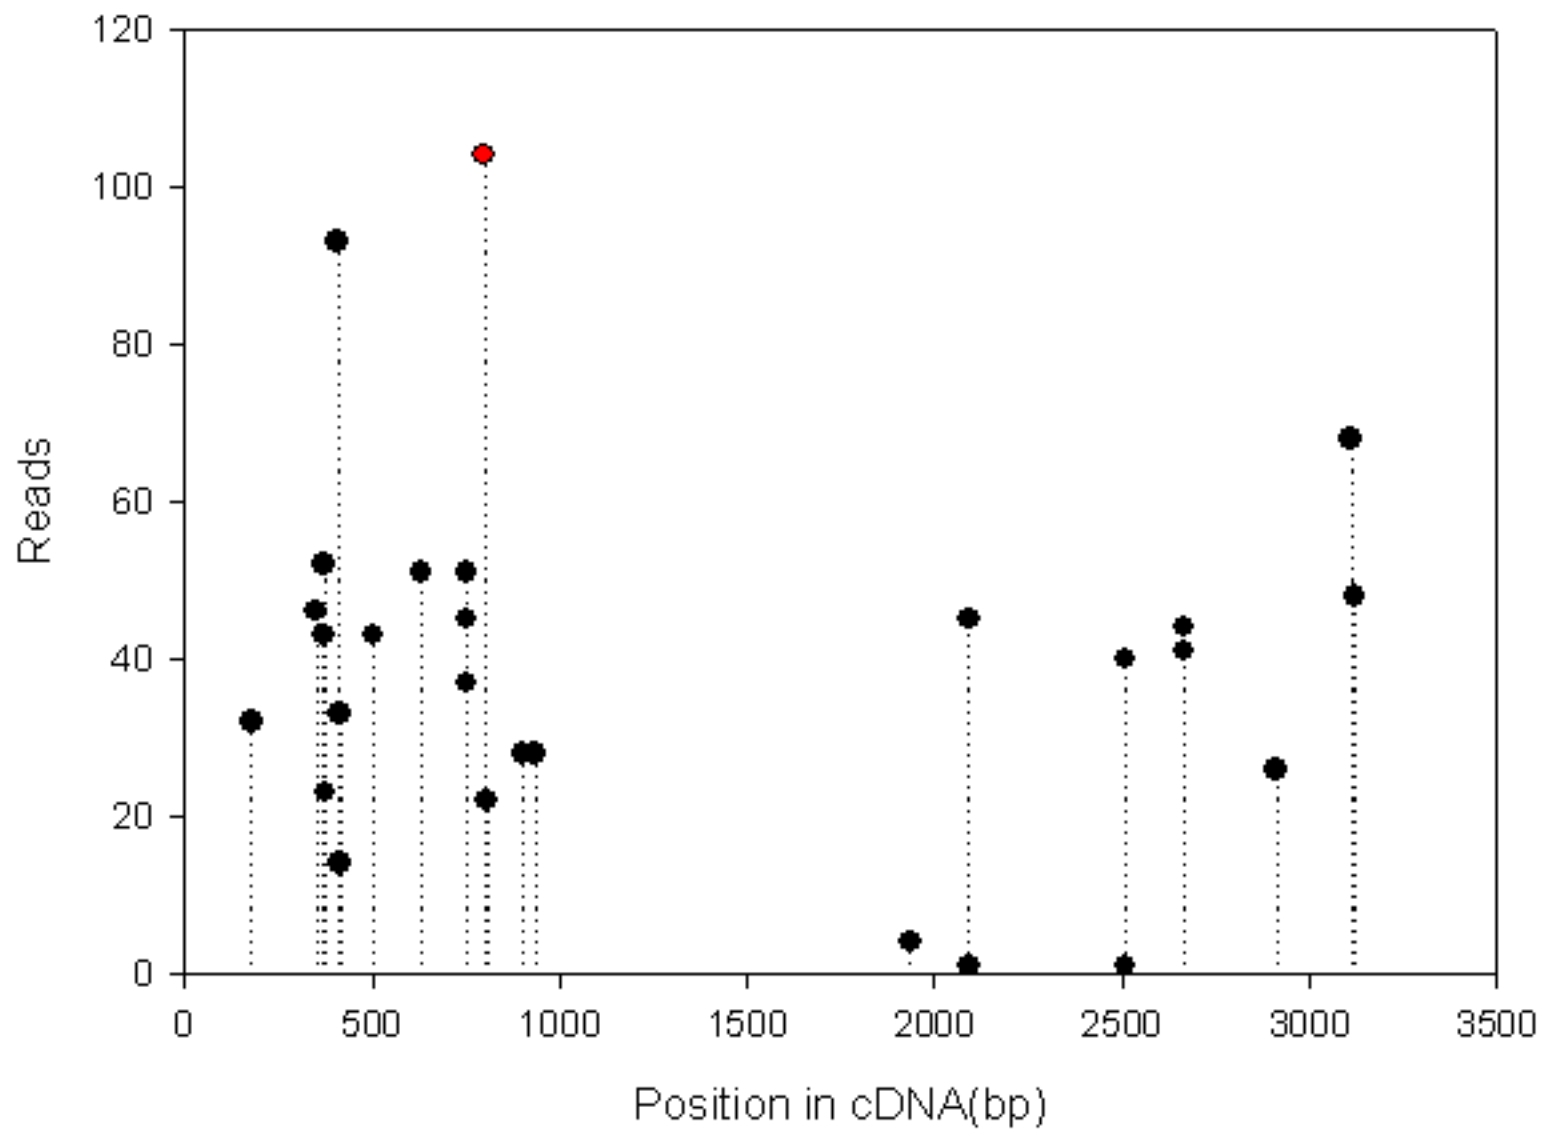

5' GGAUGGGGGGCAUAGGCAAACUAC 3'  
 :::::::::: :::::::::: ::  
 3' CCUACCCACCGUAUCCAU----- 5'

Cs3g13390.1

Csi-miR2118.2



Csi-miR2118.2, target=Cs3g13740.1 gene=Cs3g13740  
 Category:2  
 Score=4.5  
 Cleavage Site=686

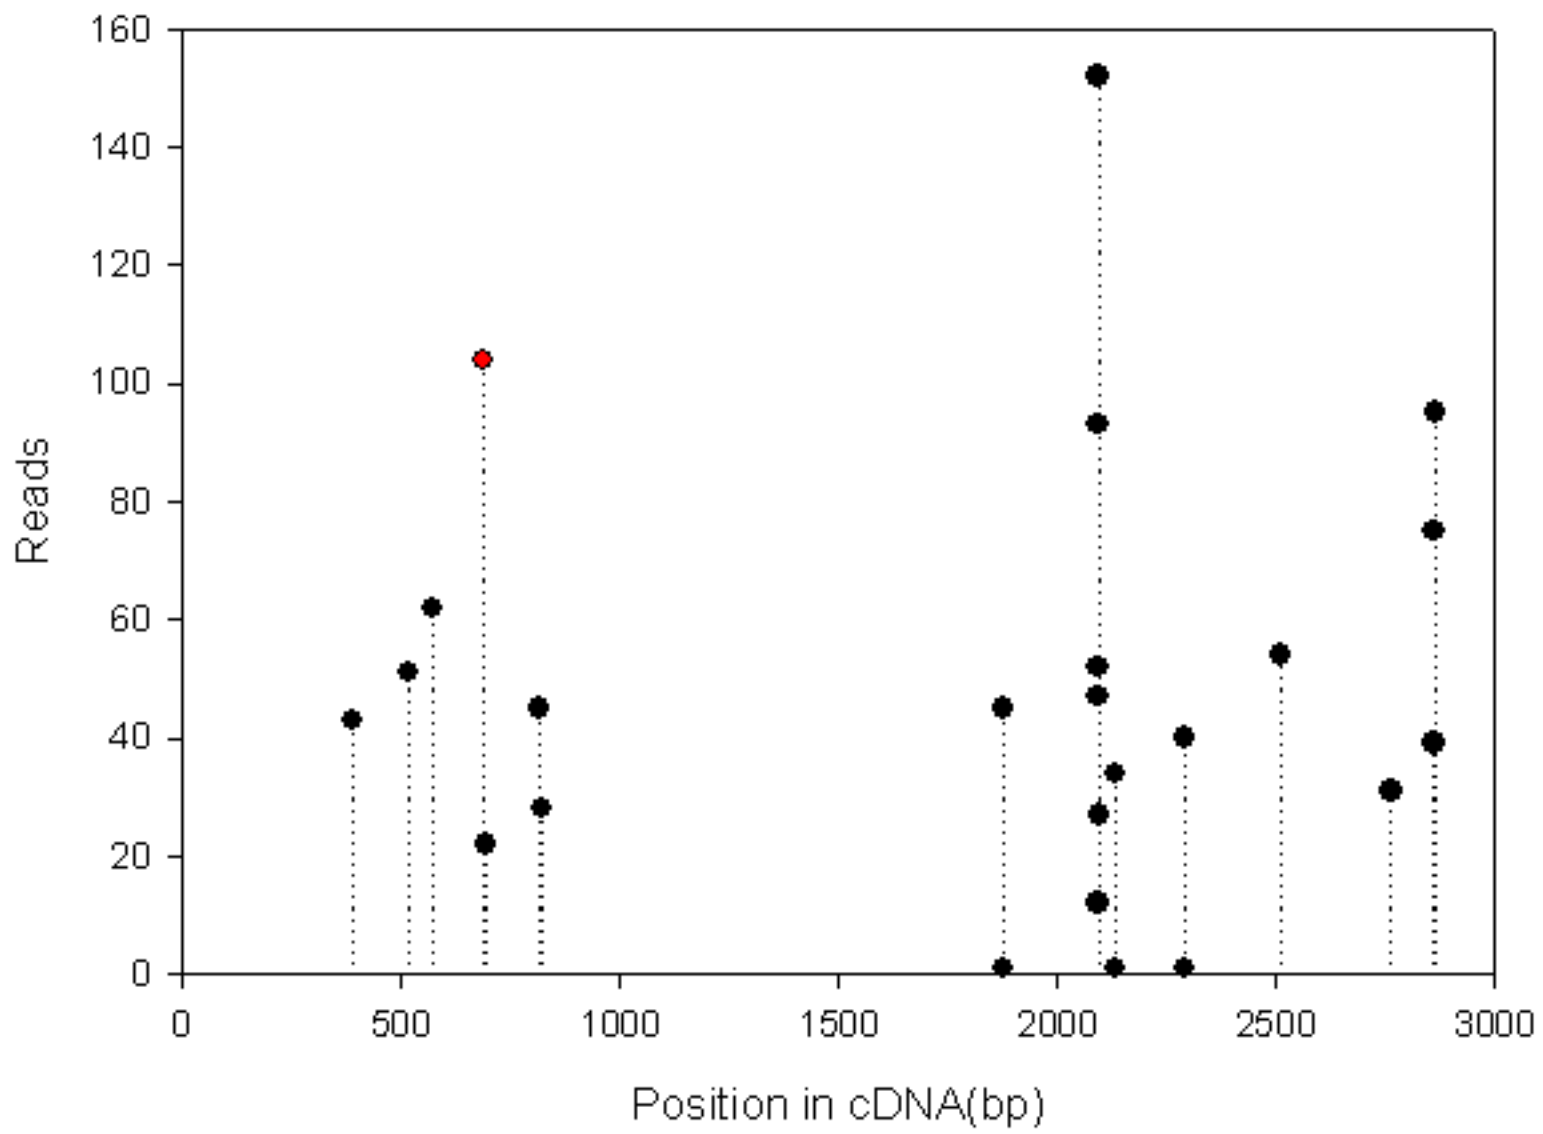

5' GGGAUAGGGGGGCAUAGGCAAACUAC 3'  
 :::::::::: :::::::::: ::  
 3' CCUACCCACCGUAUCCAUU----- 5'

Cs3g13740.1  
 Csi-miR2118.2

Csi-miR2118.2, target=Cs5g19440.1 gene=Cs5g19440  
 Category:1  
 Score=4  
 Cleavage Site=364

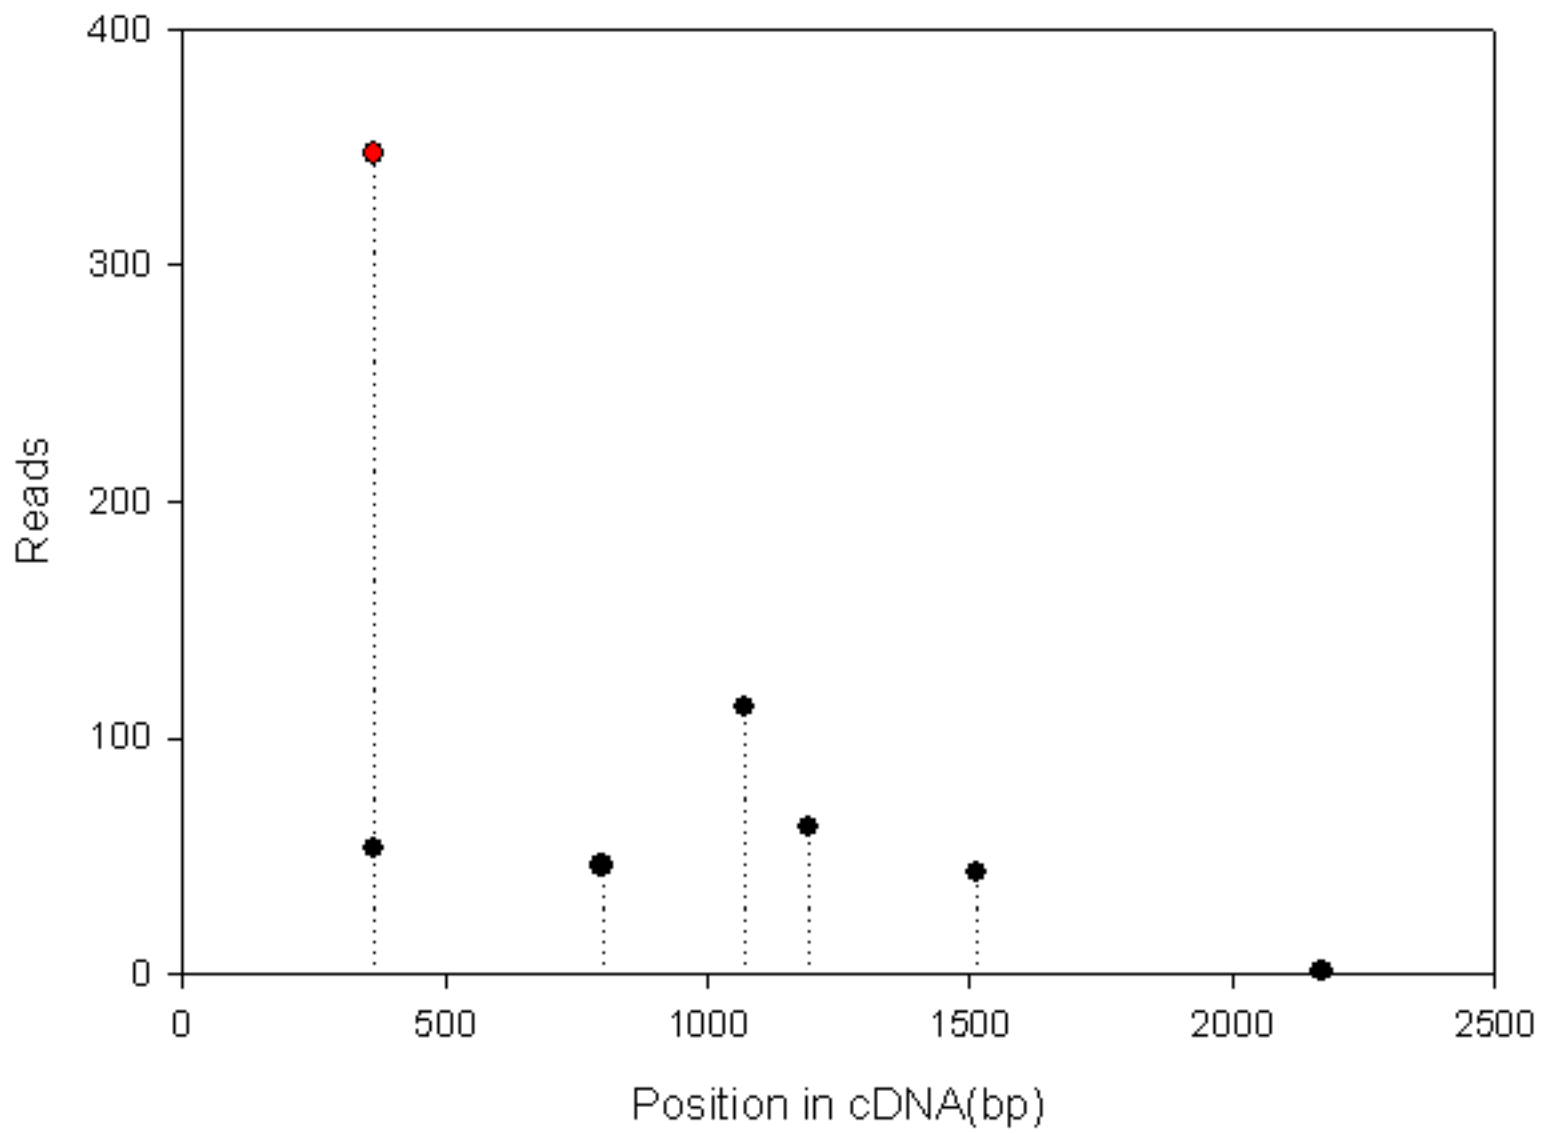

```

5' GGUAUGGGAGGUAUAGGUAAGACAAC 3'      Cs5g19440.1
   :: : : : : : : : : : : : : : :
3' CCUUAACCCACCGUAUCCAUAU----- 5'    Csi-miR2118.2
  
```

Csi-miR2118.2, target=Orange1.1t00557.1 gene=Orange1.1t00557  
 Category:2  
 Score=4  
 Cleavage Site=131

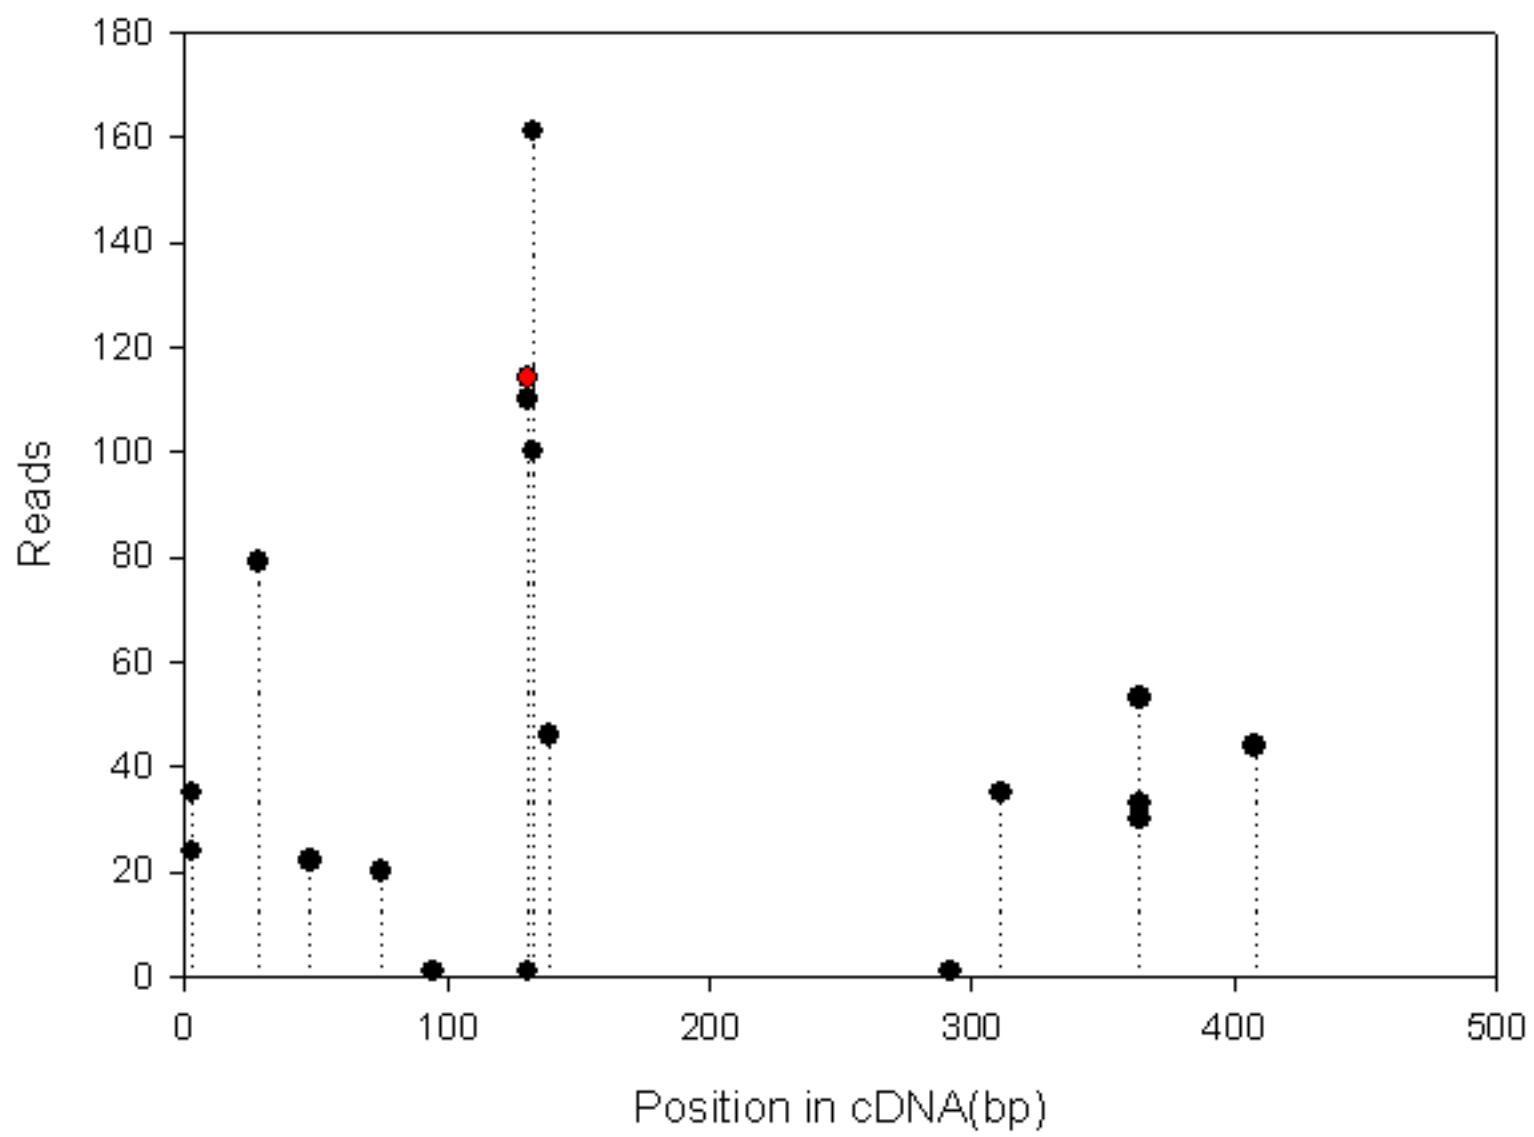

5' AAGACAUGGGUGGCAUAGGUCACAUC 3'  
 :: :::::::::::::::::::: ::  
 3' -CCU-UACCCACCGUAUCCAUU---- 5'

Orange1.1t00557.1  
 Csi-miR2118.2

Csi-miR2118.2, target=orange1.1t01829.1 gene=orange1.1t01829  
 Category:1  
 Score=4  
 Cleavage Site=810

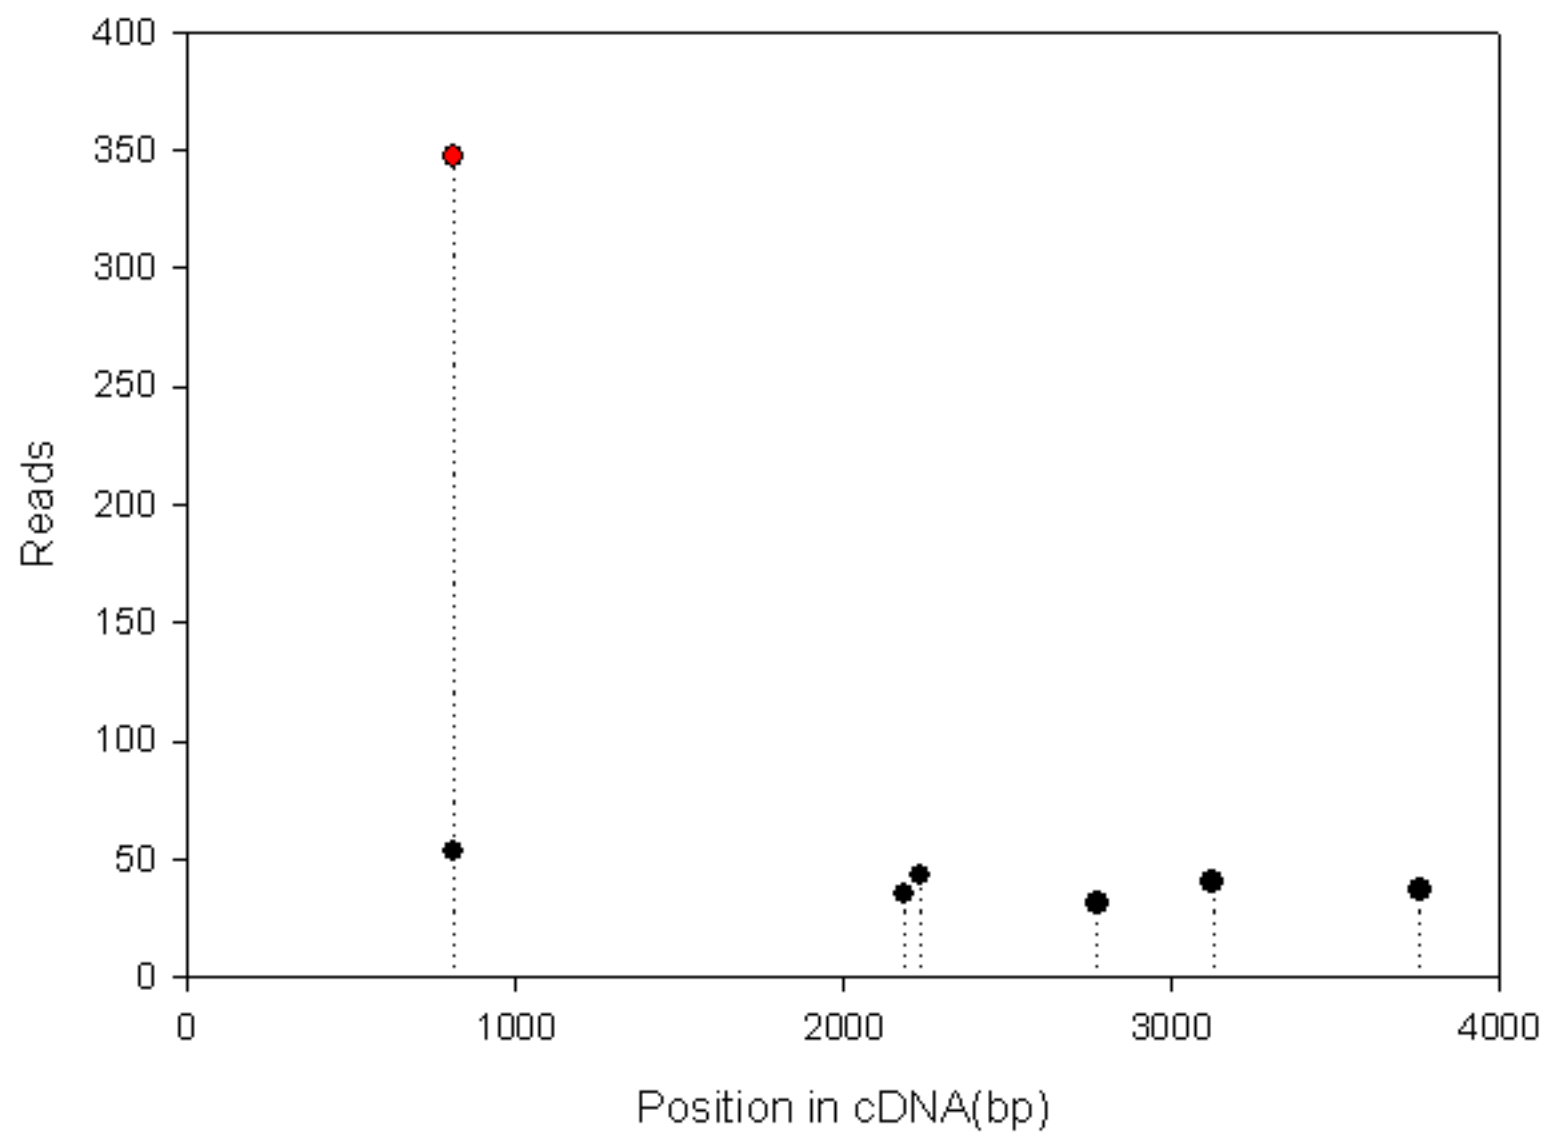

```

5' GGUAUGGGAGGUAAUAGGUAAGACAAC 3'      Orange1.1t01829.1
  :: ::::: ::.:::::::::::
3' CCUACCCACCGUAUCCAUU----- 5'      Csi-miR2118.2
  
```

Csi-miR2118.2, target=Orange1.1t02518.1 gene=Orange1.1t02518  
 Category:1  
 Score=4.5  
 Cleavage Site=1369

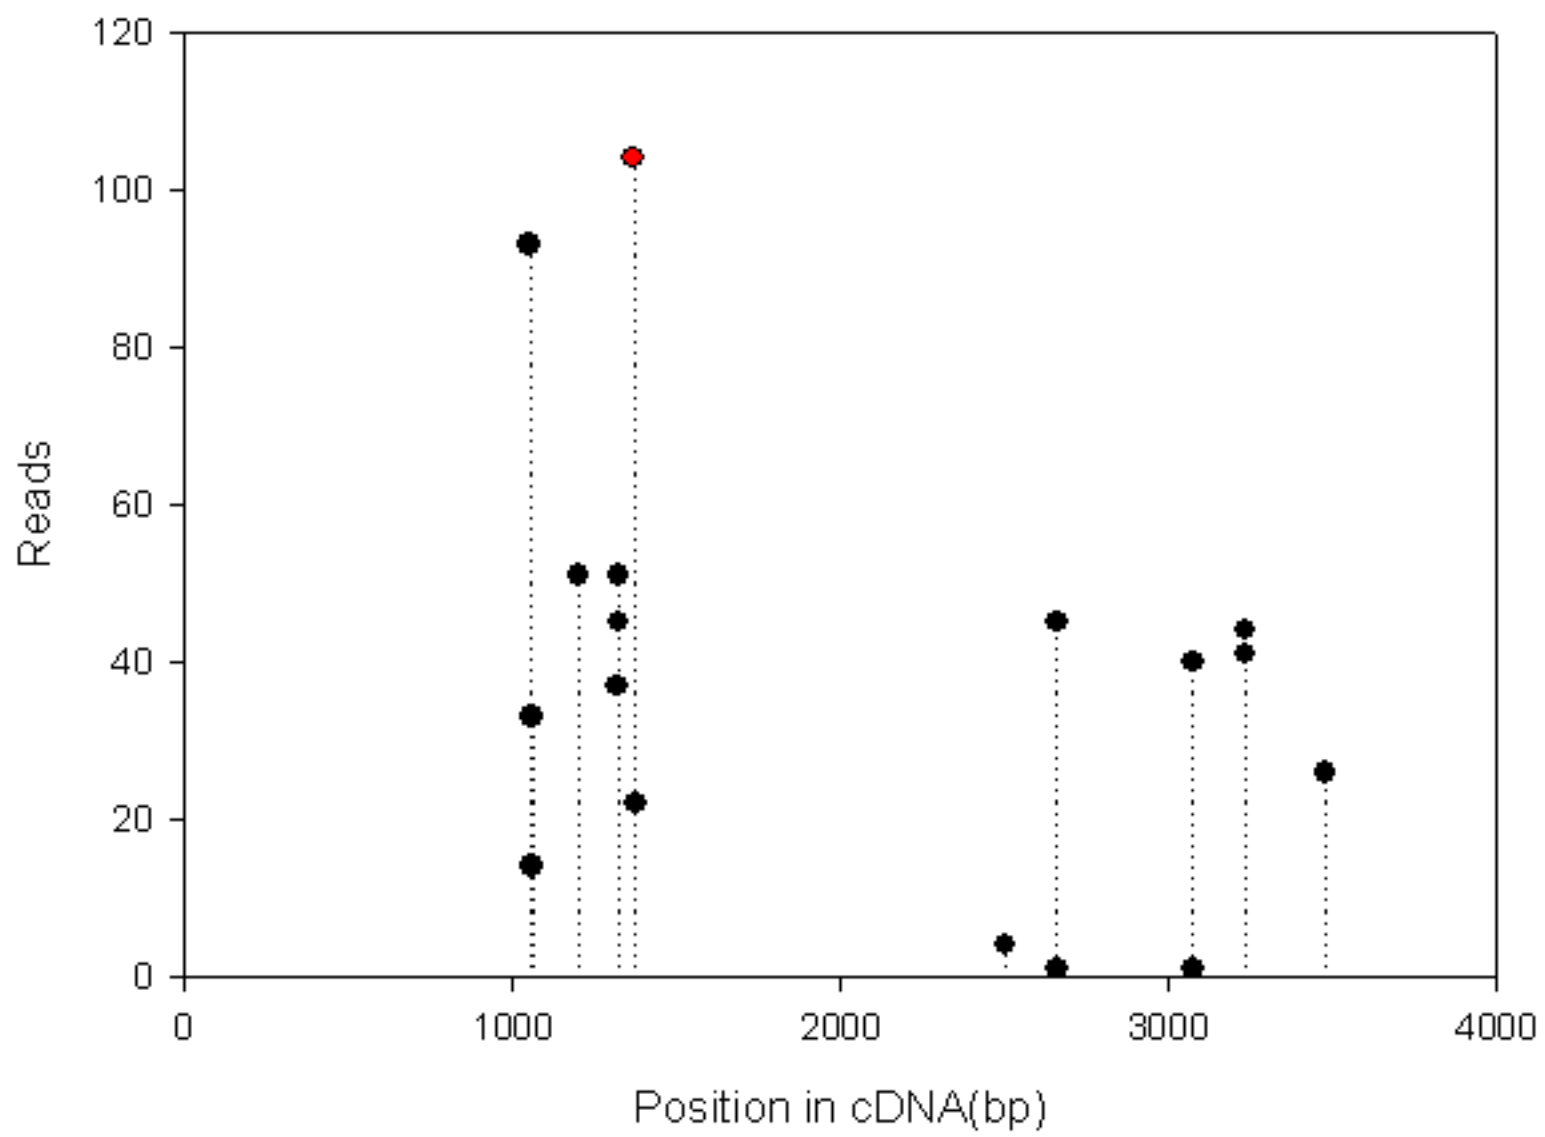

```

5' GGAUGGGGGGCAUAGGCAAACUAC 3'      Orange1.1t02518.1
   :::::::::: :::::::::: ::
3' CCUACCCACCGUAUCCAUU----- 5'      Csi-miR2118.2
  
```

Csi-miR390.1, target=Cs9g01780.1 gene=Cs9g01780  
 Category:2  
 Score=4.5  
 Cleavage Site=495

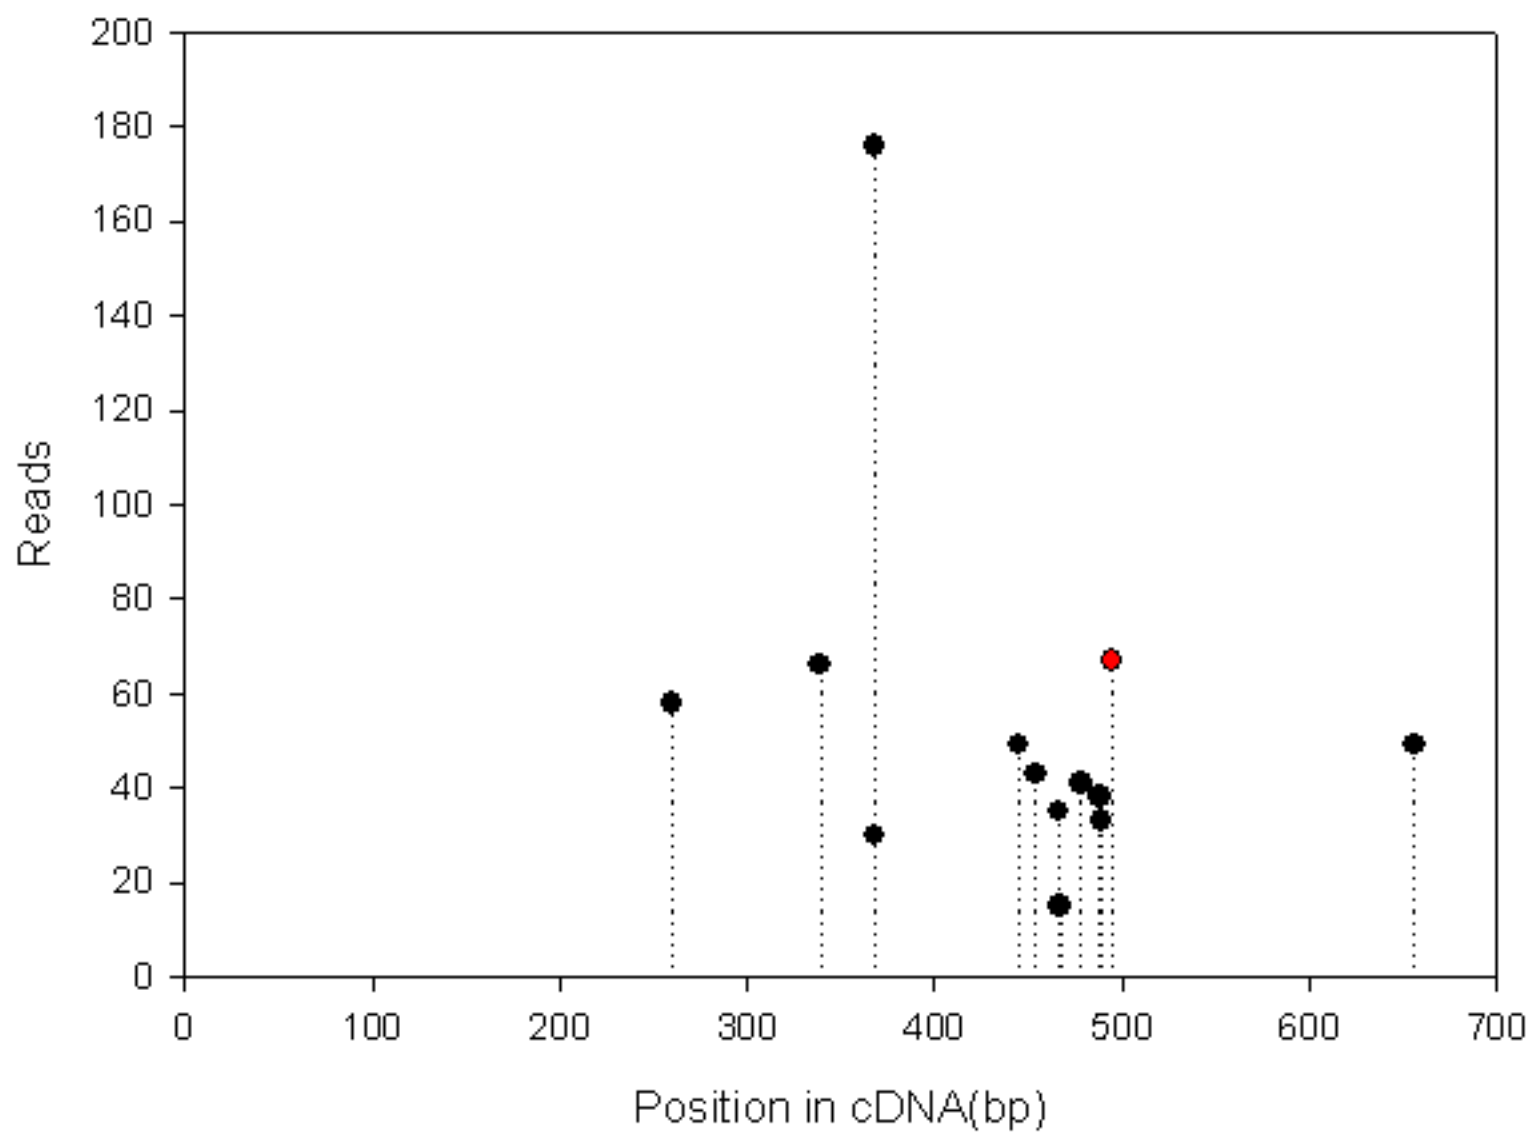

```

5' CUUCCUUGUCUAUCCCUCCUGAGCUG 3'      Cs9g01780.1
   . : : : : : : : : : : : : : : : :
3' ----CCGC-GAUAGGGAGGACUCGAA 5'      Csi-miR390.1
  
```

Csi-miR390.2, target=Cs9g01780.1 gene=Cs9g01780  
 Category:2  
 Score=3.5  
 Cleavage Site=495



```

5' CUUCCUUGUCUAUCCCUCCUGAGCUG 3'      Cs9g01780.1
      . : : : : : : : : : : : : : :
3' ----CCGC-GAUAGGGAGGACUCGA- 5'      Csi-miR390.2
  
```

Csi-miR390b, target=Cs9g01780.1 gene=Cs9g01780  
 Category:2  
 Score=0  
 Cleavage Site=495



```

5' CUUCCUUGUCUAUCCCUCCUGAGCUG 3'      Cs9g01780.1
      ::::::::::::::::::::::::::::
3' -----AACAGAUAGGGAGGACUCGAC 5'      Csi-miR390b
  
```



Csi-miR391a.1, target=Cs5g17560.1 gene=Cs5g17560  
 Category:2  
 Score=4.5  
 Cleavage Site=2317

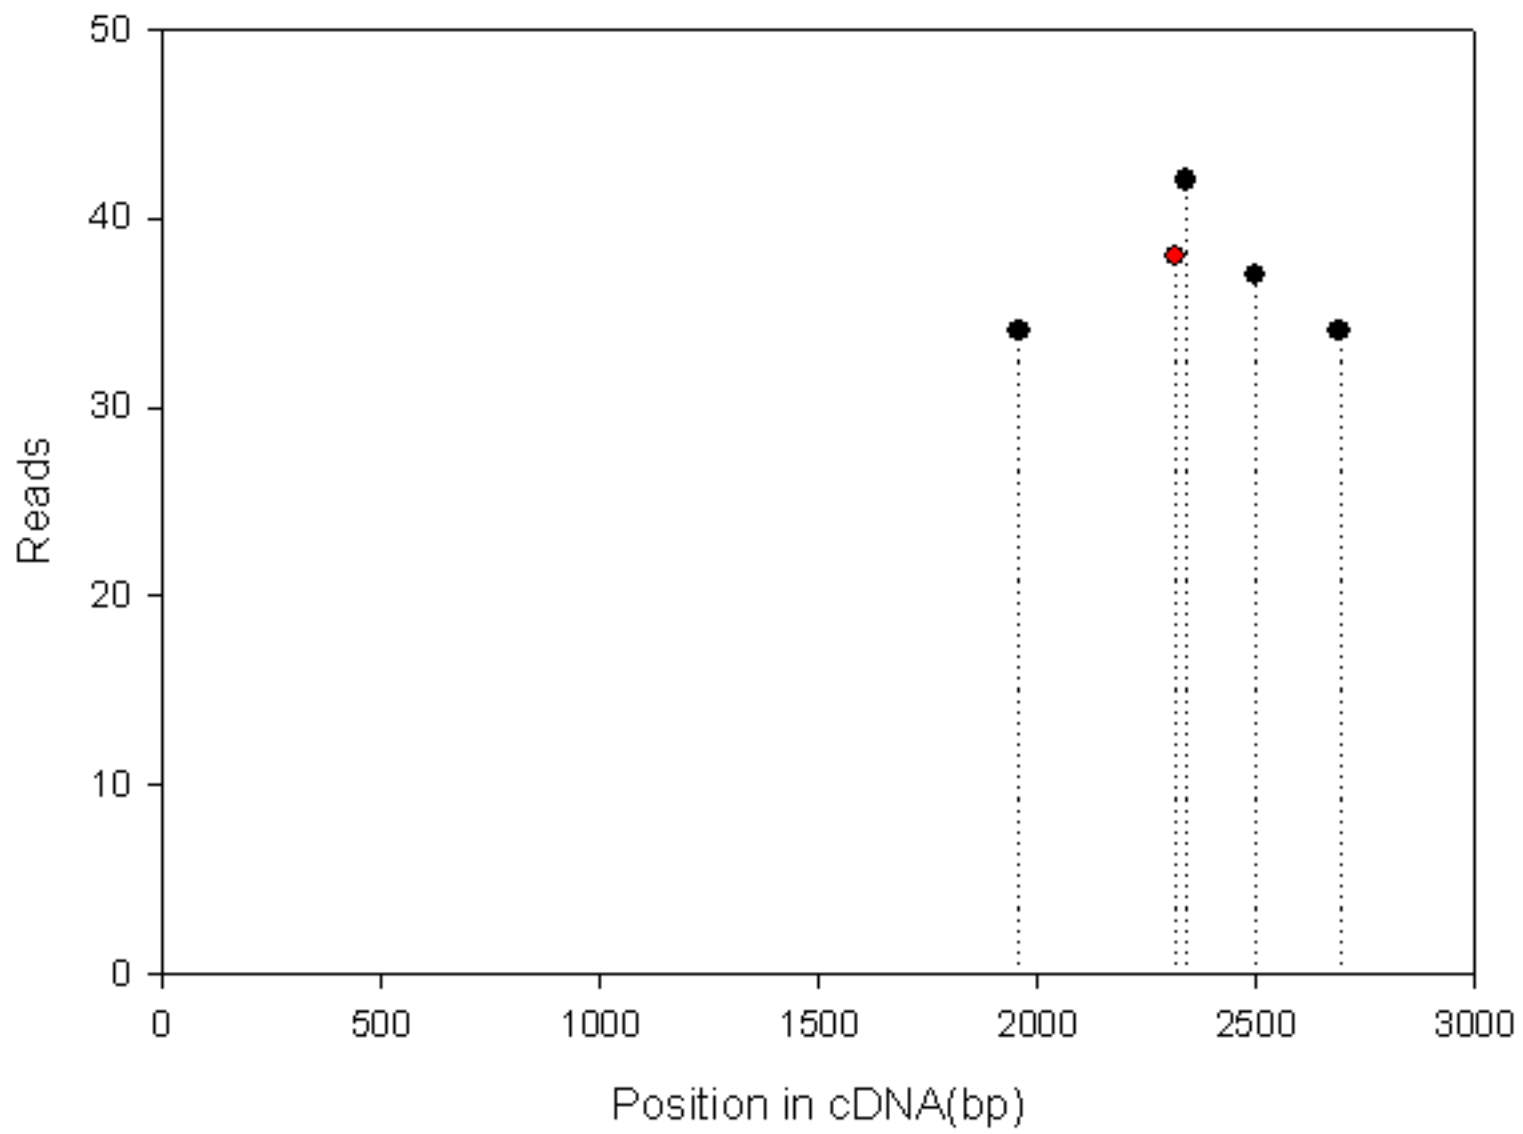

```

5' GCUUGC-AUUUUUCUGGUGACAAUCUC 3'      Cs5g17560.1
   : : : : : : : : : : : : : : : :
3' ---ACGAUAGAGAGGCCGCUGUU---- 5'      Csi-miR391a.1
  
```

Csi-miR393a.2-3p, target=Orange1.1t01772.1 gene=Orange1.1t0177  
 Category:3  
 Score=3.5  
 Cleavage Site=1915

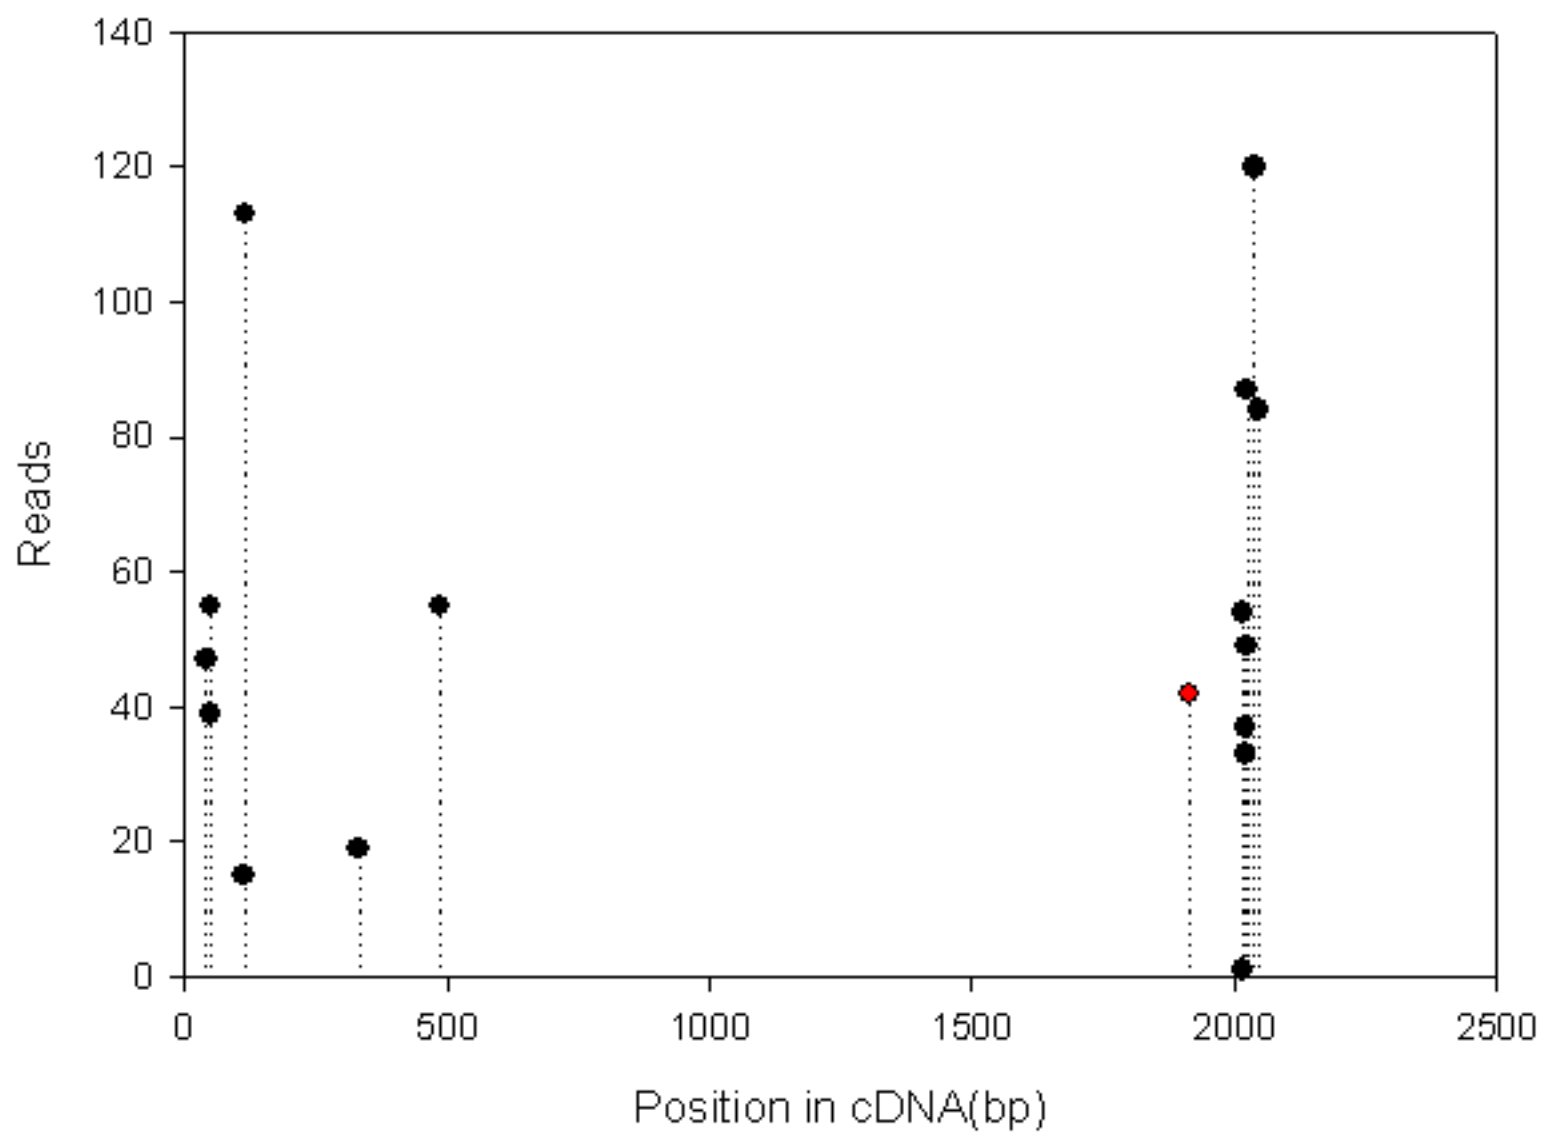

5' GGAAGAAUUCAAUGGAAUAGCAUGAU 3'  
 : : : : : : : : : : : : : : : : : :  
 3' -----UUAGGUUCCCUAUCGUACUA 5'

Orange1.1t01772.1  
 Csi-miR393a.2-3p

Csi-miR394, target=Orange1.1t03542.1 gene=Orange1.1t03542  
 Category:3  
 Score=5  
 Cleavage Site=1135

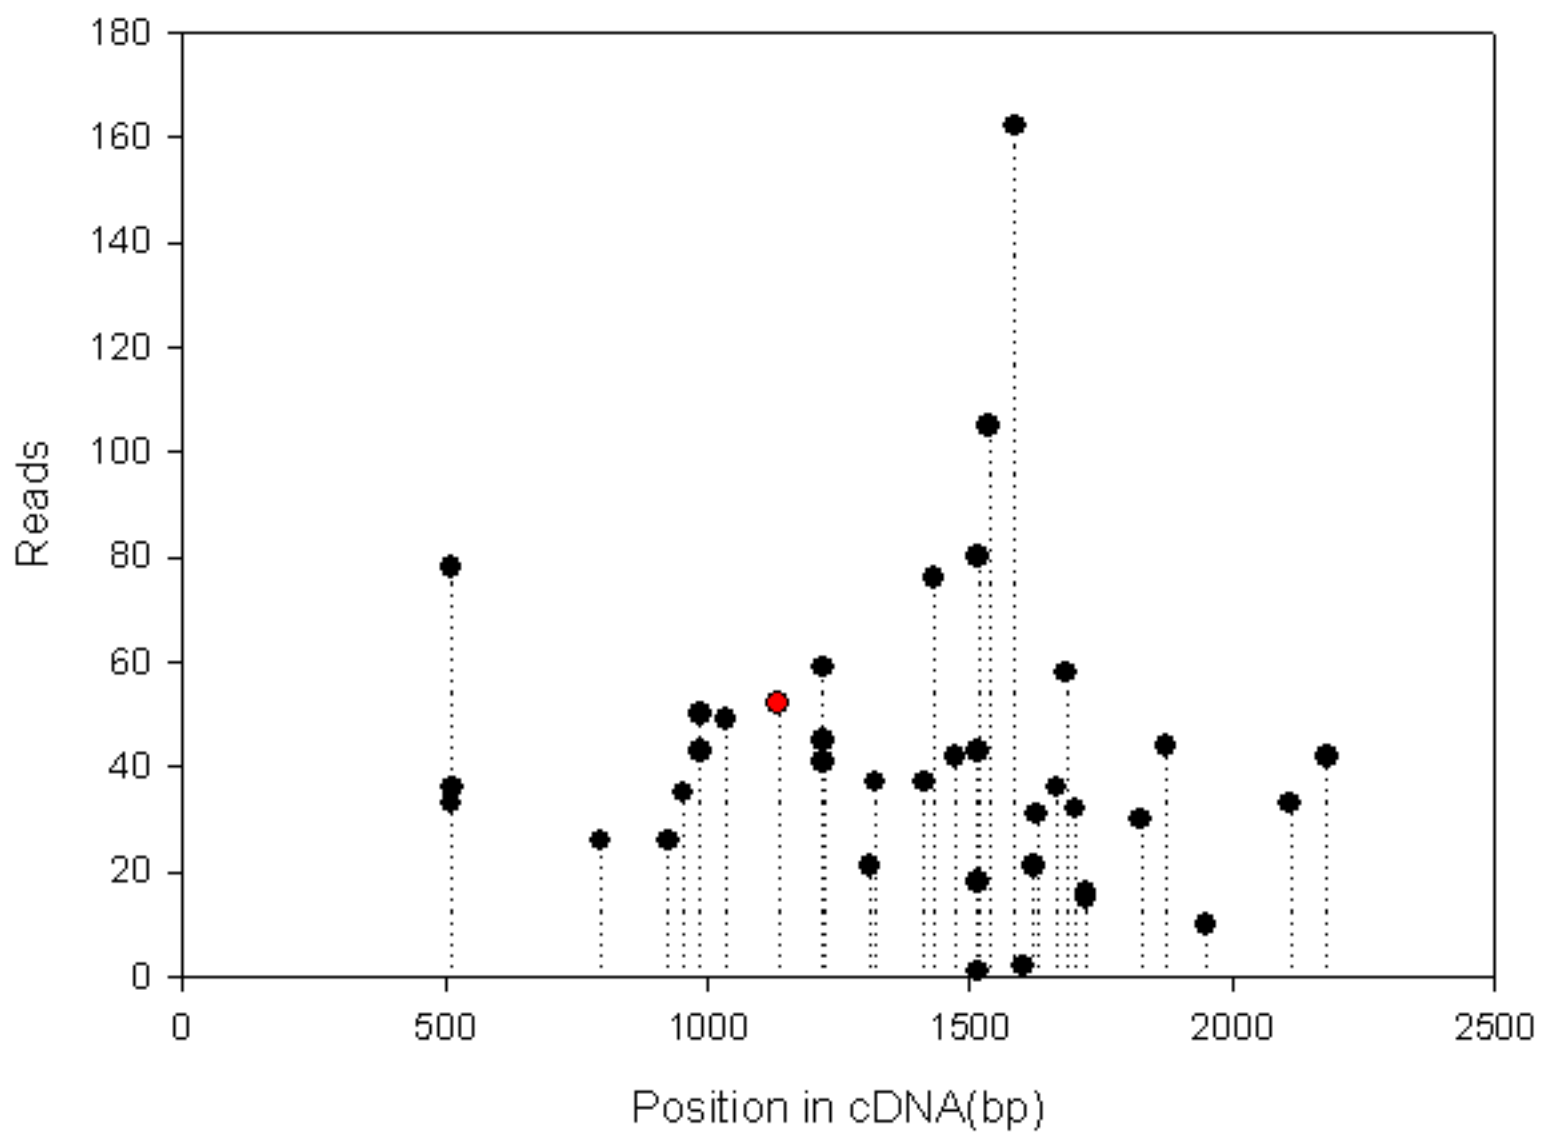

```

5' GUGAGG-GGACAGAAUGUAAAGCGCCA 3'      Orange1.1t03542.1
   : : : : : : : : : : : : : : : : :
3' -CCUCCACCUGUCUUACGGUU----- 5'      Csi-miR394
  
```

Csi-miR394-3p.1, target=Cs3g09210.1 gene=Cs3g09210  
 Category:3  
 Score=5  
 Cleavage Site=1866

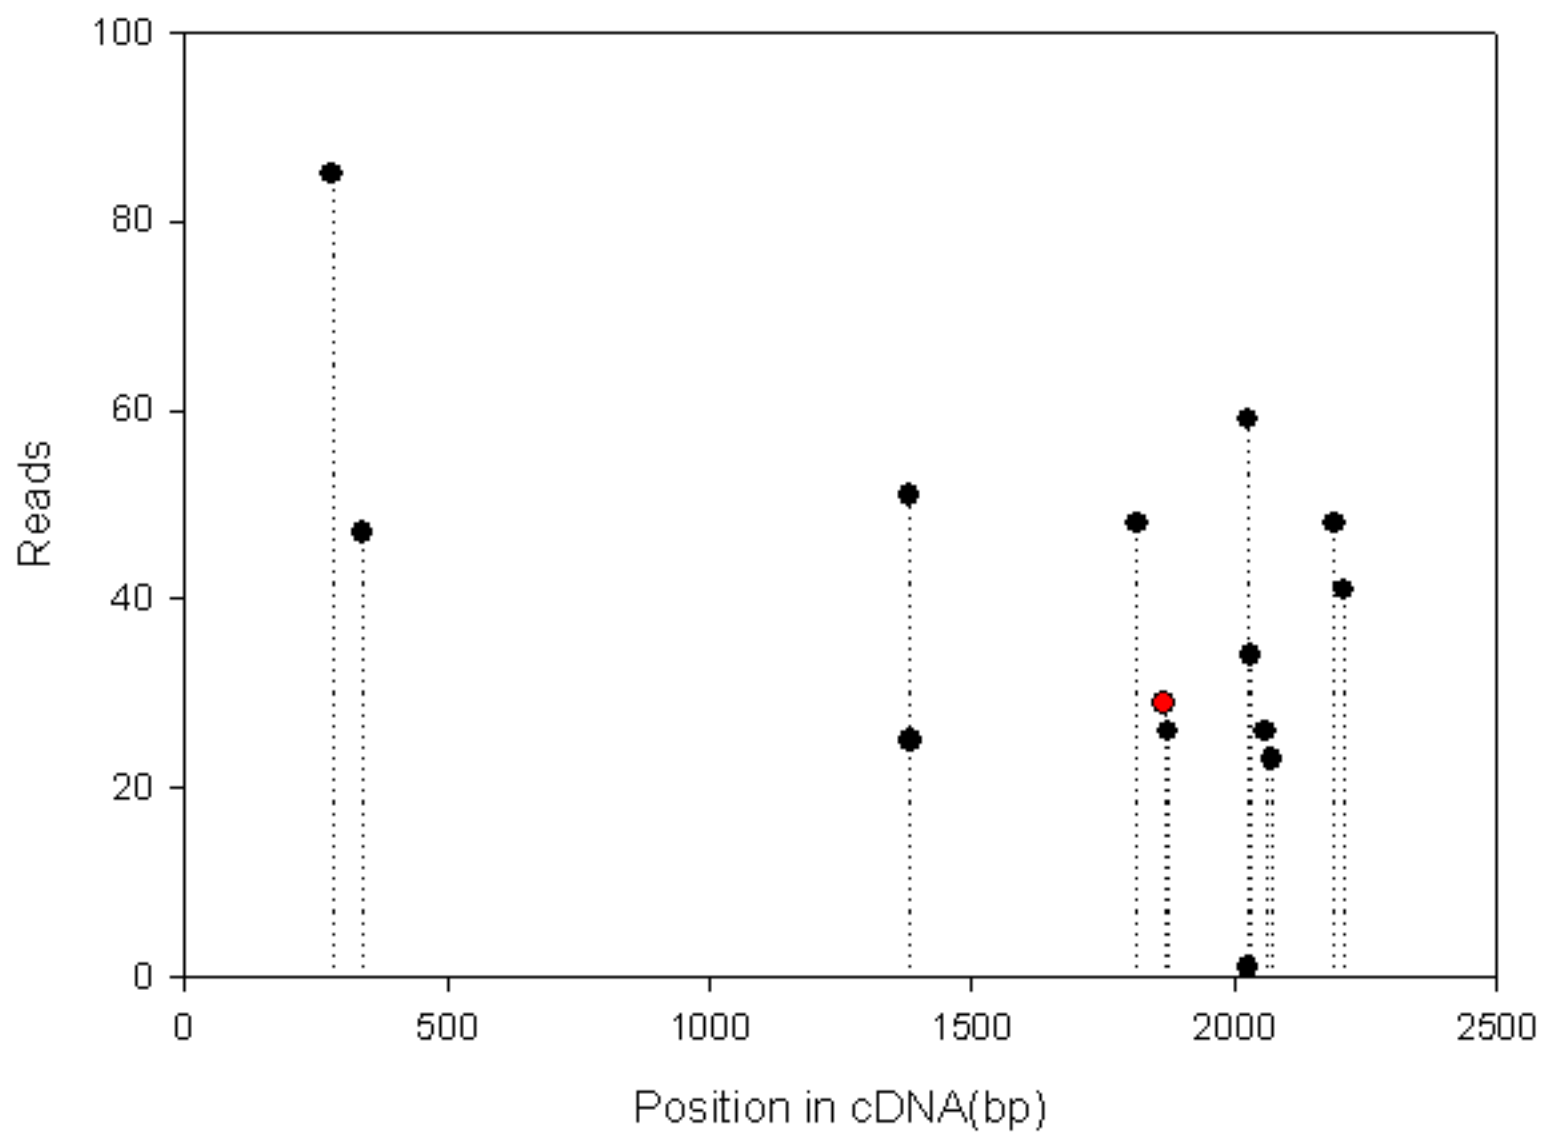

```

5' GUUUGUUUGGAAUUU-UCUAGCUGAUA 3'      Cs3g09210.1
   : : : : : : : : : : : : : : : :
3' --AUCAAACGUUAAACAGGUCGA---- 5'      Csi-miR394-3p.1
  
```



Csi-miR3951, target=Cs1g06060.1 gene=Cs1g06060  
 Category:2  
 Score=2.5  
 Cleavage Site=174

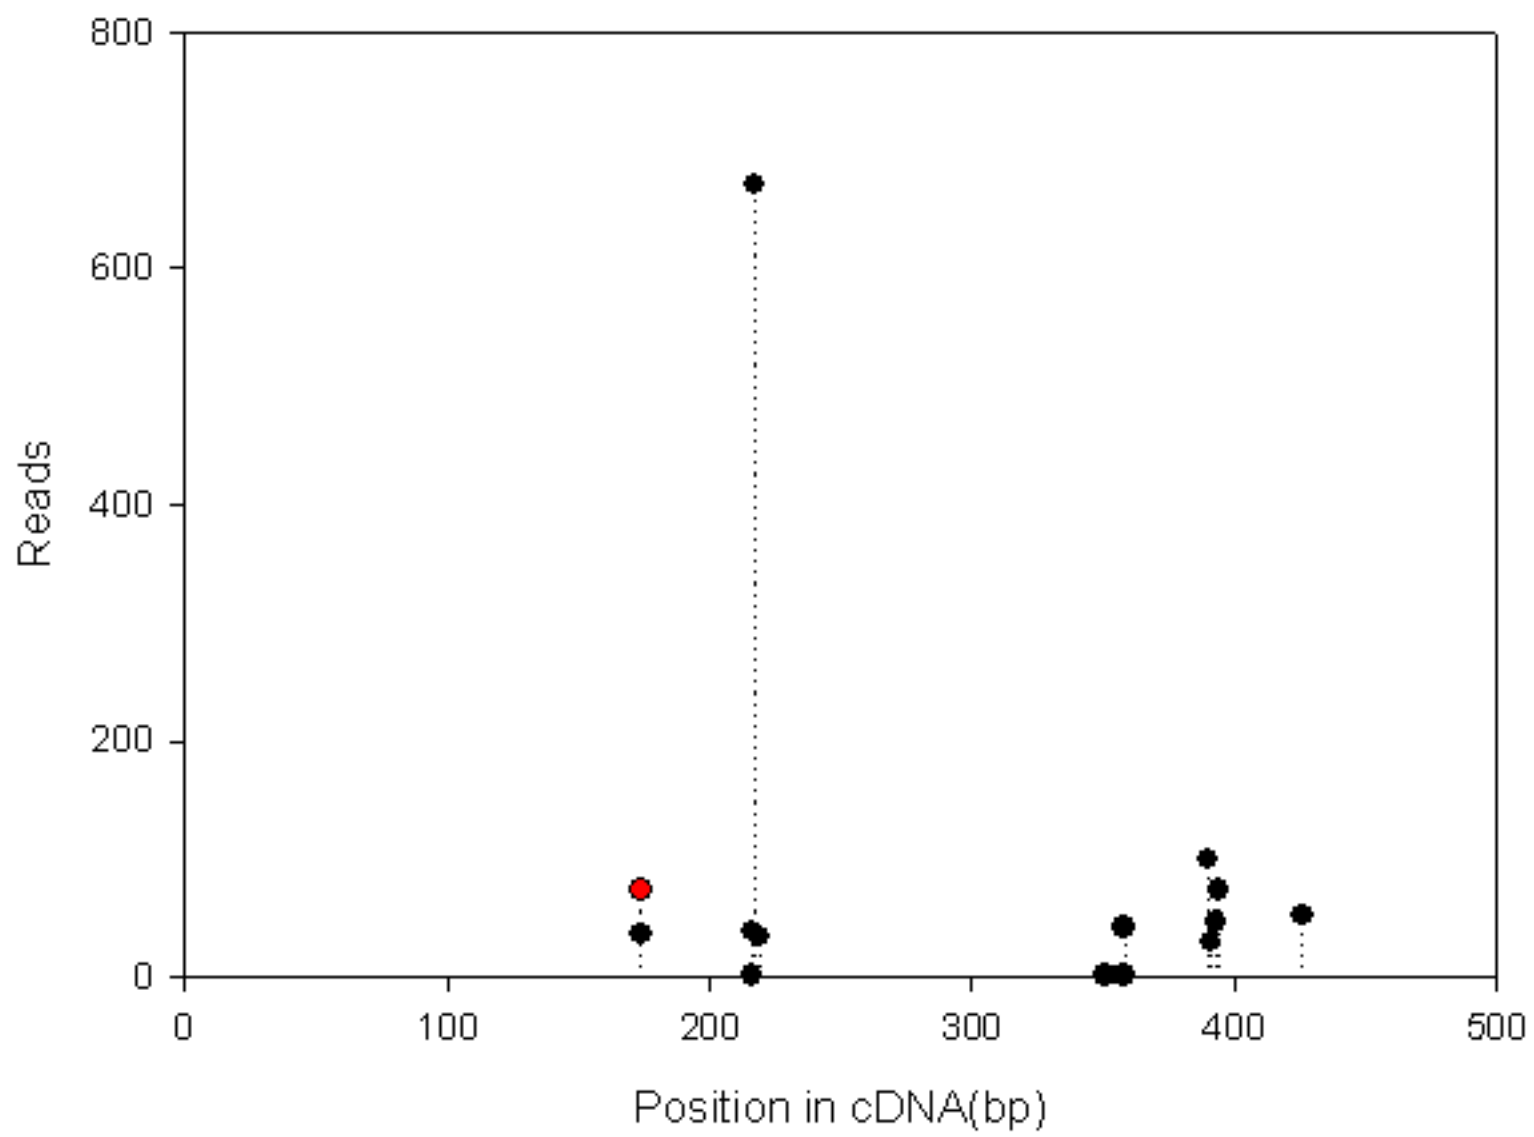

```

5' UUUUUUUCUCUC-UCUUUAUCUGUGGG 3'      Cs1g06060.1
   ::::::::::: :::::::::::
3' --AAAAGAGAGUAGAAAUAGAU---- 5'      Csi-miR3951
  
```

Csi-miR3951, target=Orange1.1t05622.1 gene=Orange1.1t05622

Category:2

Score=2.5

Cleavage Site=113

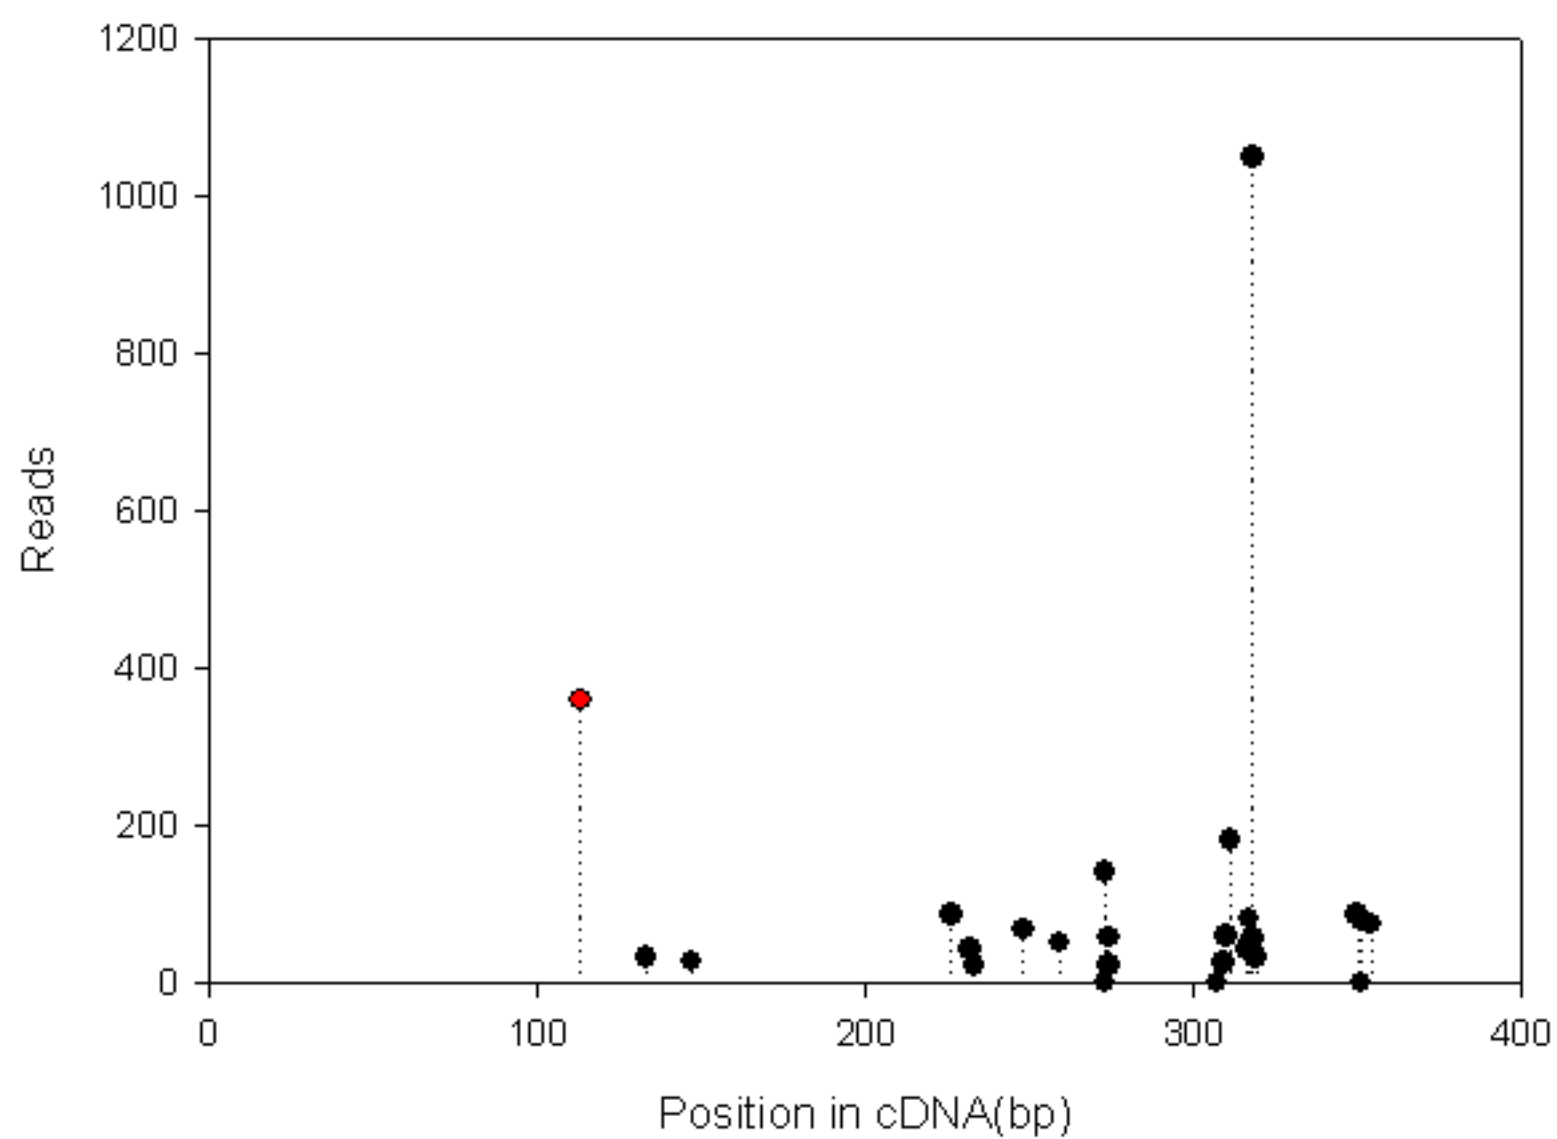

5' UUUUUUUCUCUC-UCUUUAUCUGUGGG 3'

Orange1.1t05622.1

.....

3' --AAAAGAGAGUAGAAUAGAU---- 5'

Csi-miR3951

Csi-miR3951-3p, target=Cs6g09300.1 gene=Cs6g09300  
 Category:3  
 Score=5  
 Cleavage Site=352

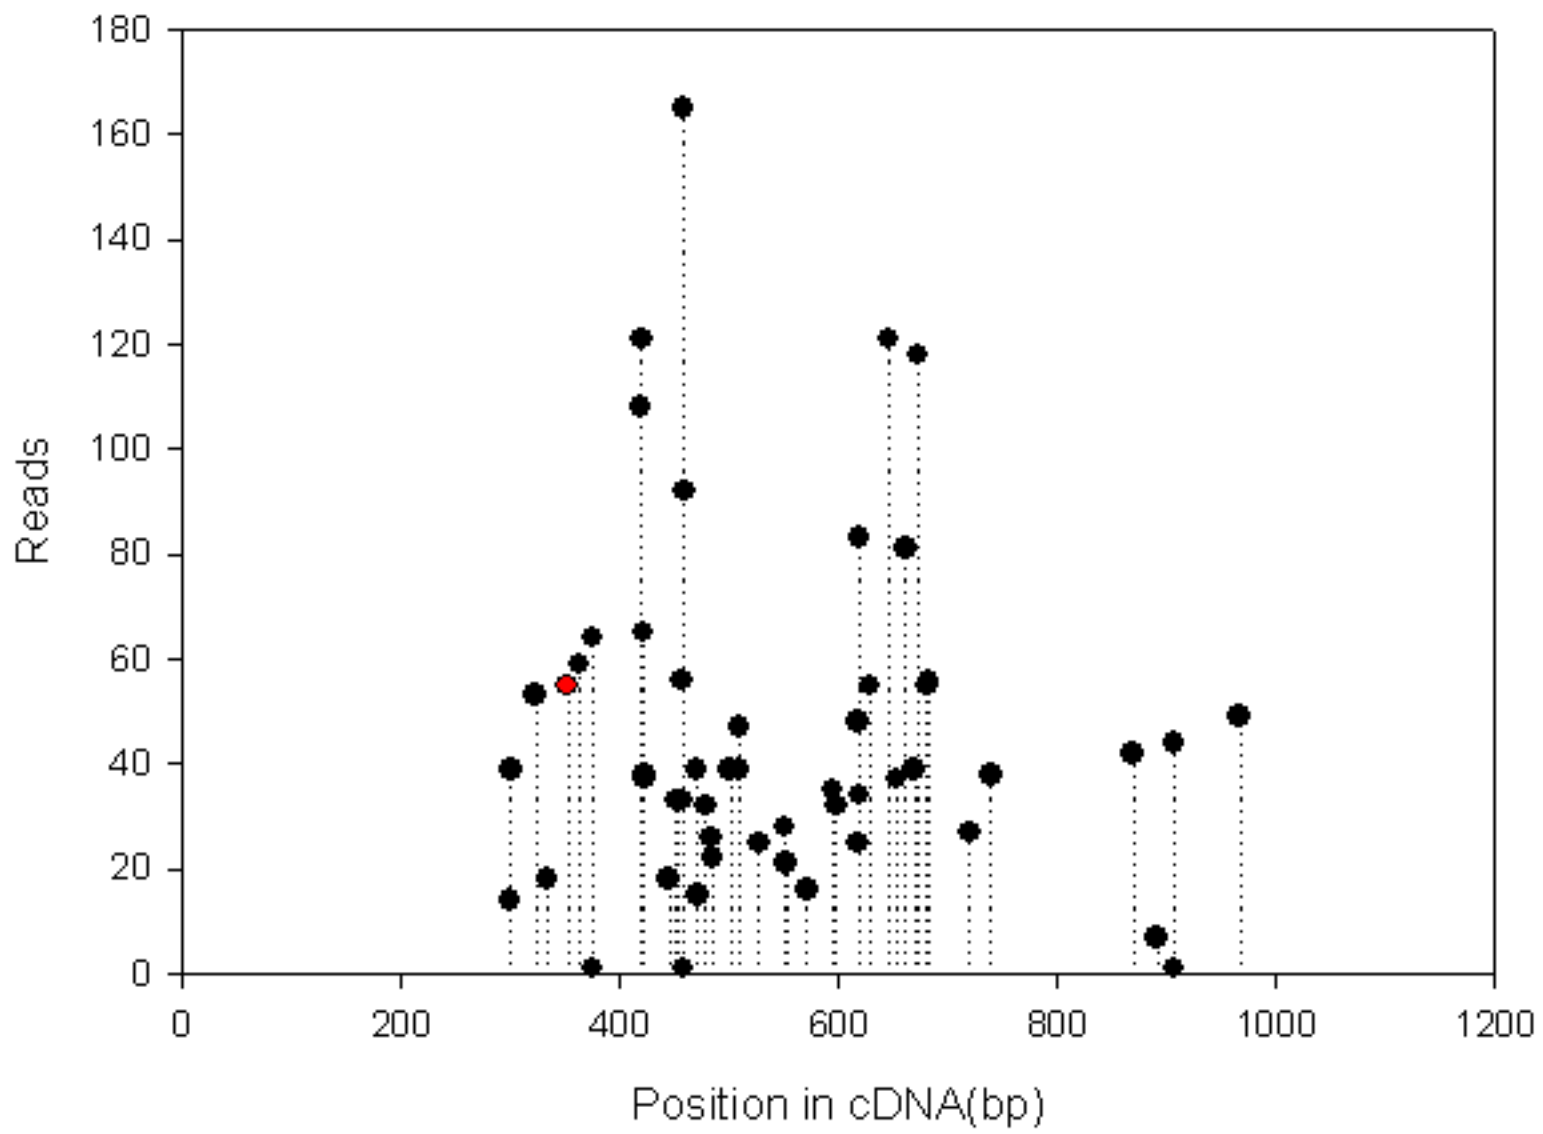

```

5' CCACCAAAGAACGAUAAGAAAAAGGU 3'      Cs6g09300.1
   :: : :::::::::::::: :::
3' ---UGUCUAUUGCUAUUCUCUUU--- 5'      Csi-miR3951-3p

```



Csi-miR3952.1, target=Cs8g13286.1 gene=Cs8g13286  
 Category:3  
 Score=3  
 Cleavage Site=304

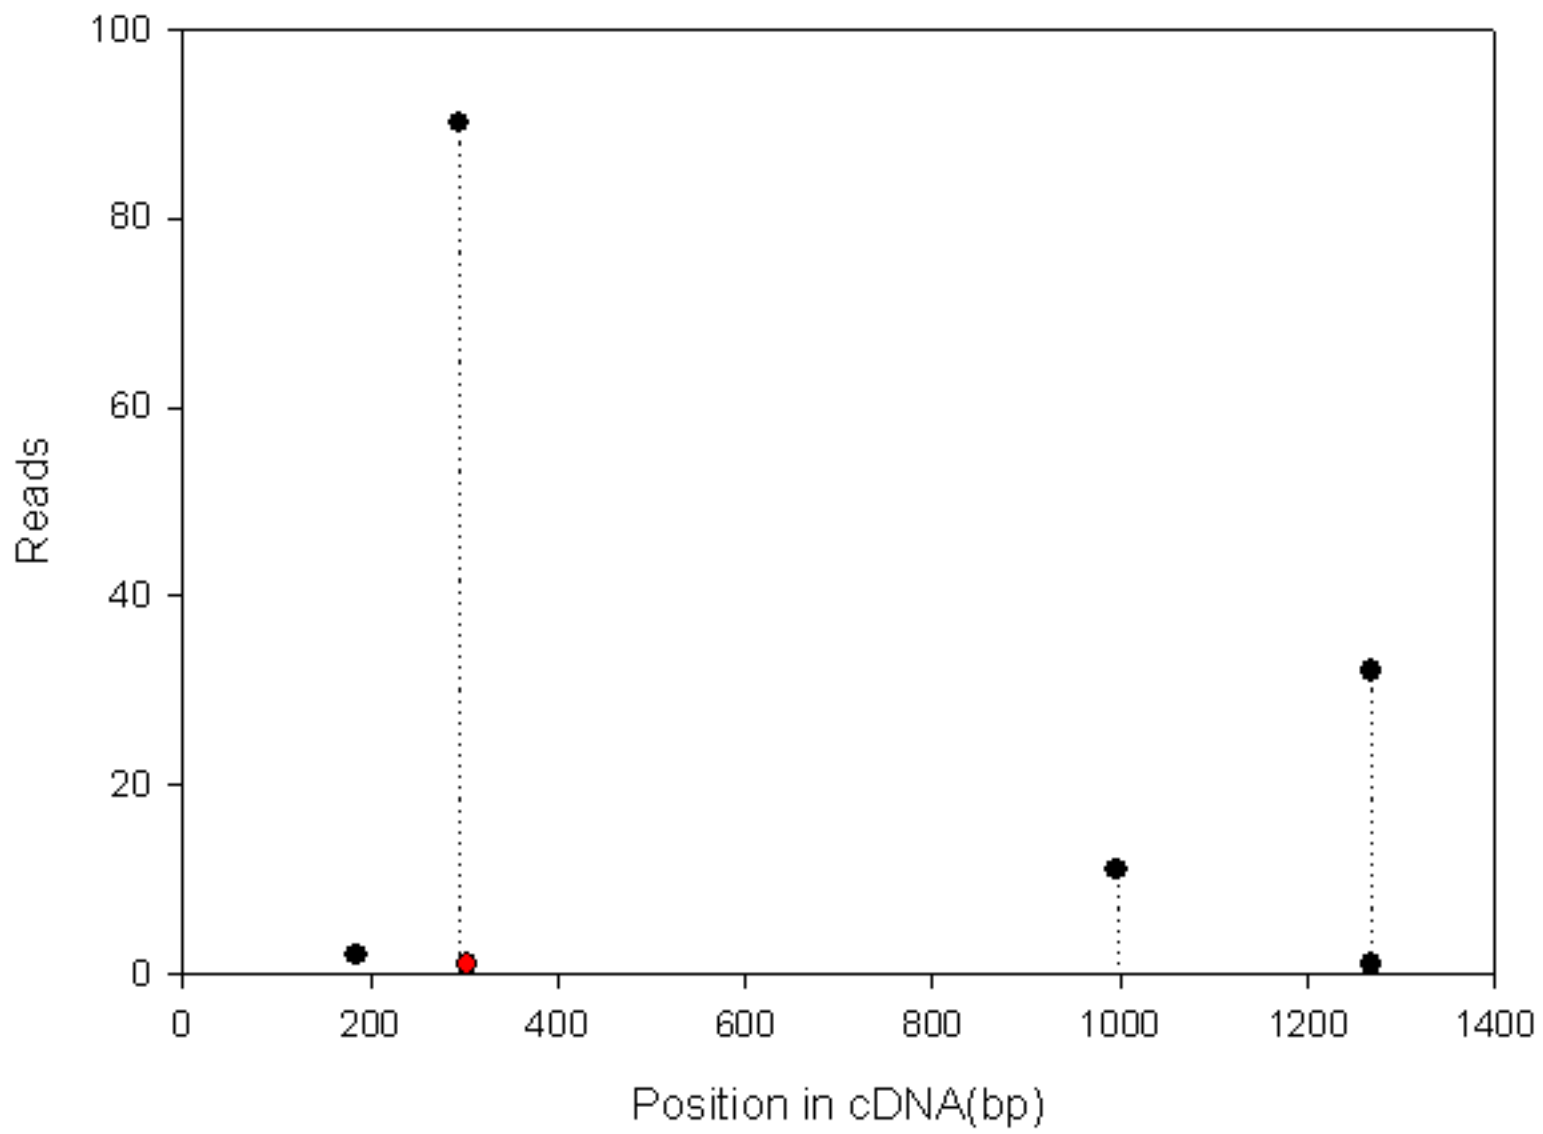

```

5' AGUUGAAGGGCCUUUCUAGAGCACUG 3'      Cs8g13286.1
   : : : : : : : : : : : : : : : : : :
3' --AACUCCCCGGAAAGAUGUCGU--- 5'      Csi-miR3952.1
  
```

Csi-miR3952.2, target=Cs8g13286.1 gene=Cs8g13286  
 Category:3  
 Score=3  
 Cleavage Site=304

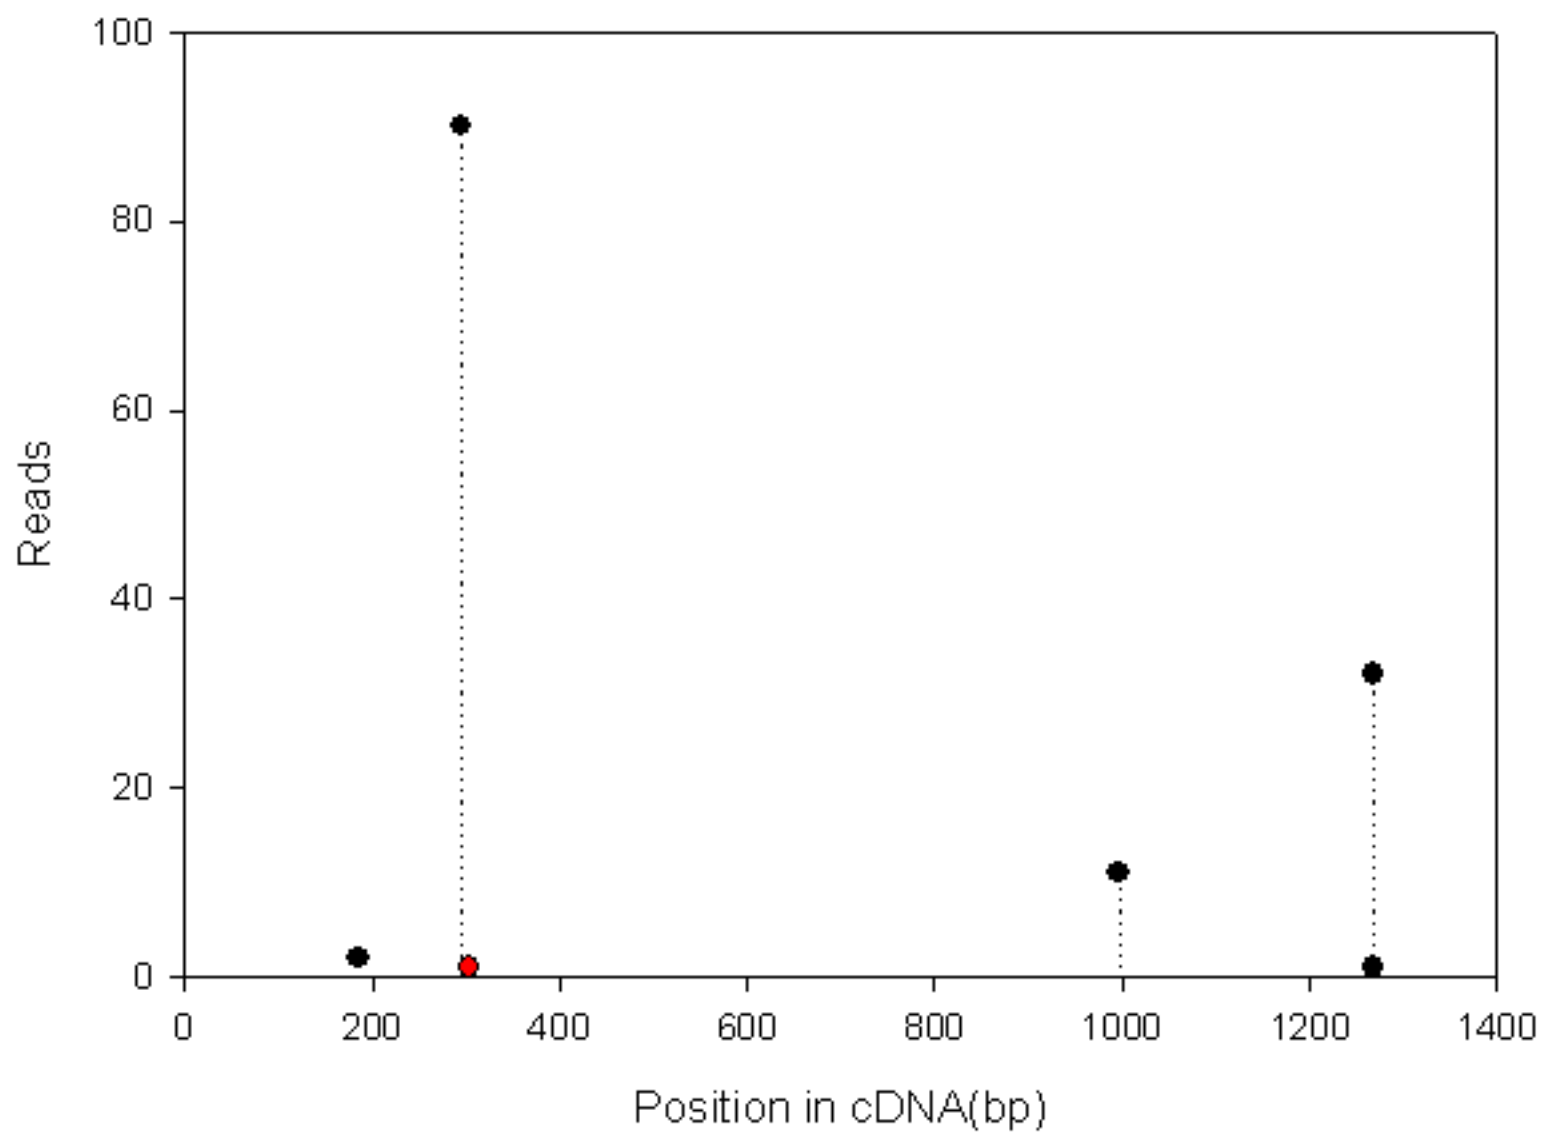

```

5' AGUUGAAGGGCCUUUCUAGAGCACUG 3'      Cs8g13286.1
   : : : : : : : : : : : : : : : : :
3' -CAACUCCCCGGAAAGAUGUCG----- 5'    Csi-miR3952.2
  
```

Csi-miR3952-3p, target=Cs8g13286.1 gene=Cs8g13286  
 Category:3  
 Score=3  
 Cleavage Site=185

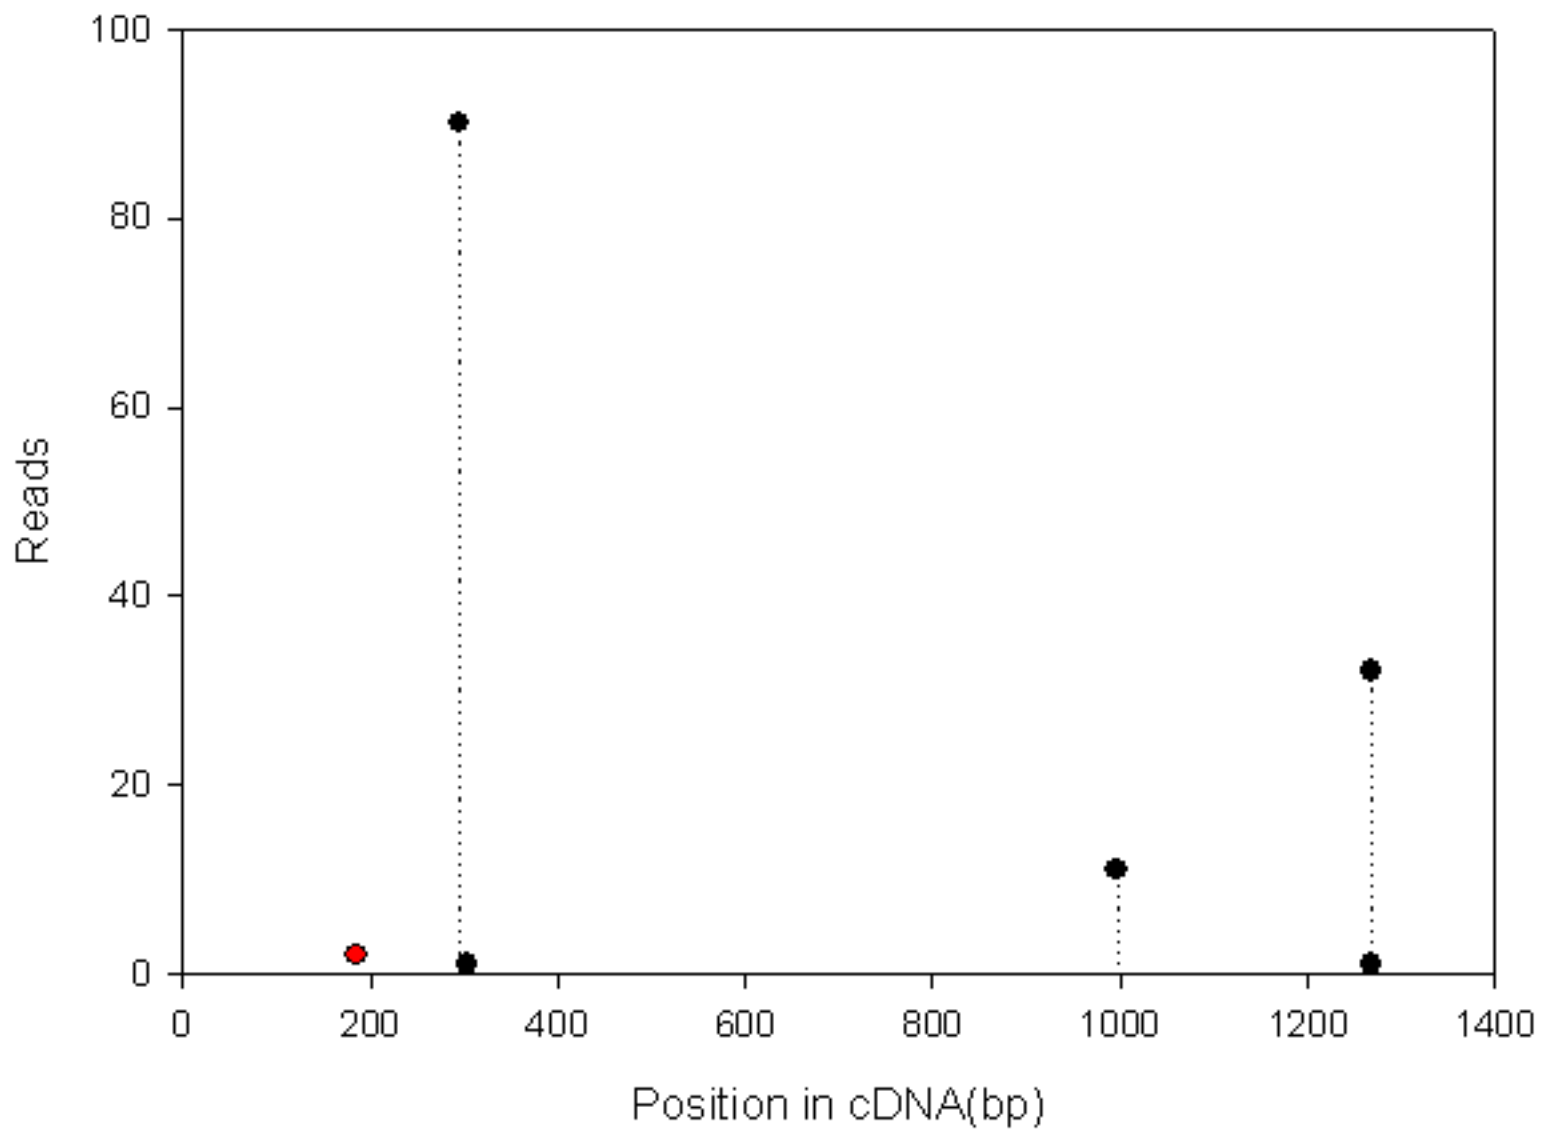

```

5' UGUGCUGUAGAAAGGCCCCUCAACCU 3'      Cs8g13286.1
   : : : : : : : : : : : : : : : :
3' -CACGAGAUCUUUCCGGGAAGU---- 5'      Csi-miR3952-3p
  
```

Csi-miR3954a, target=Cs1g09600.1 gene=Cs1g09600  
 Category:3  
 Score=1  
 Cleavage Site=416

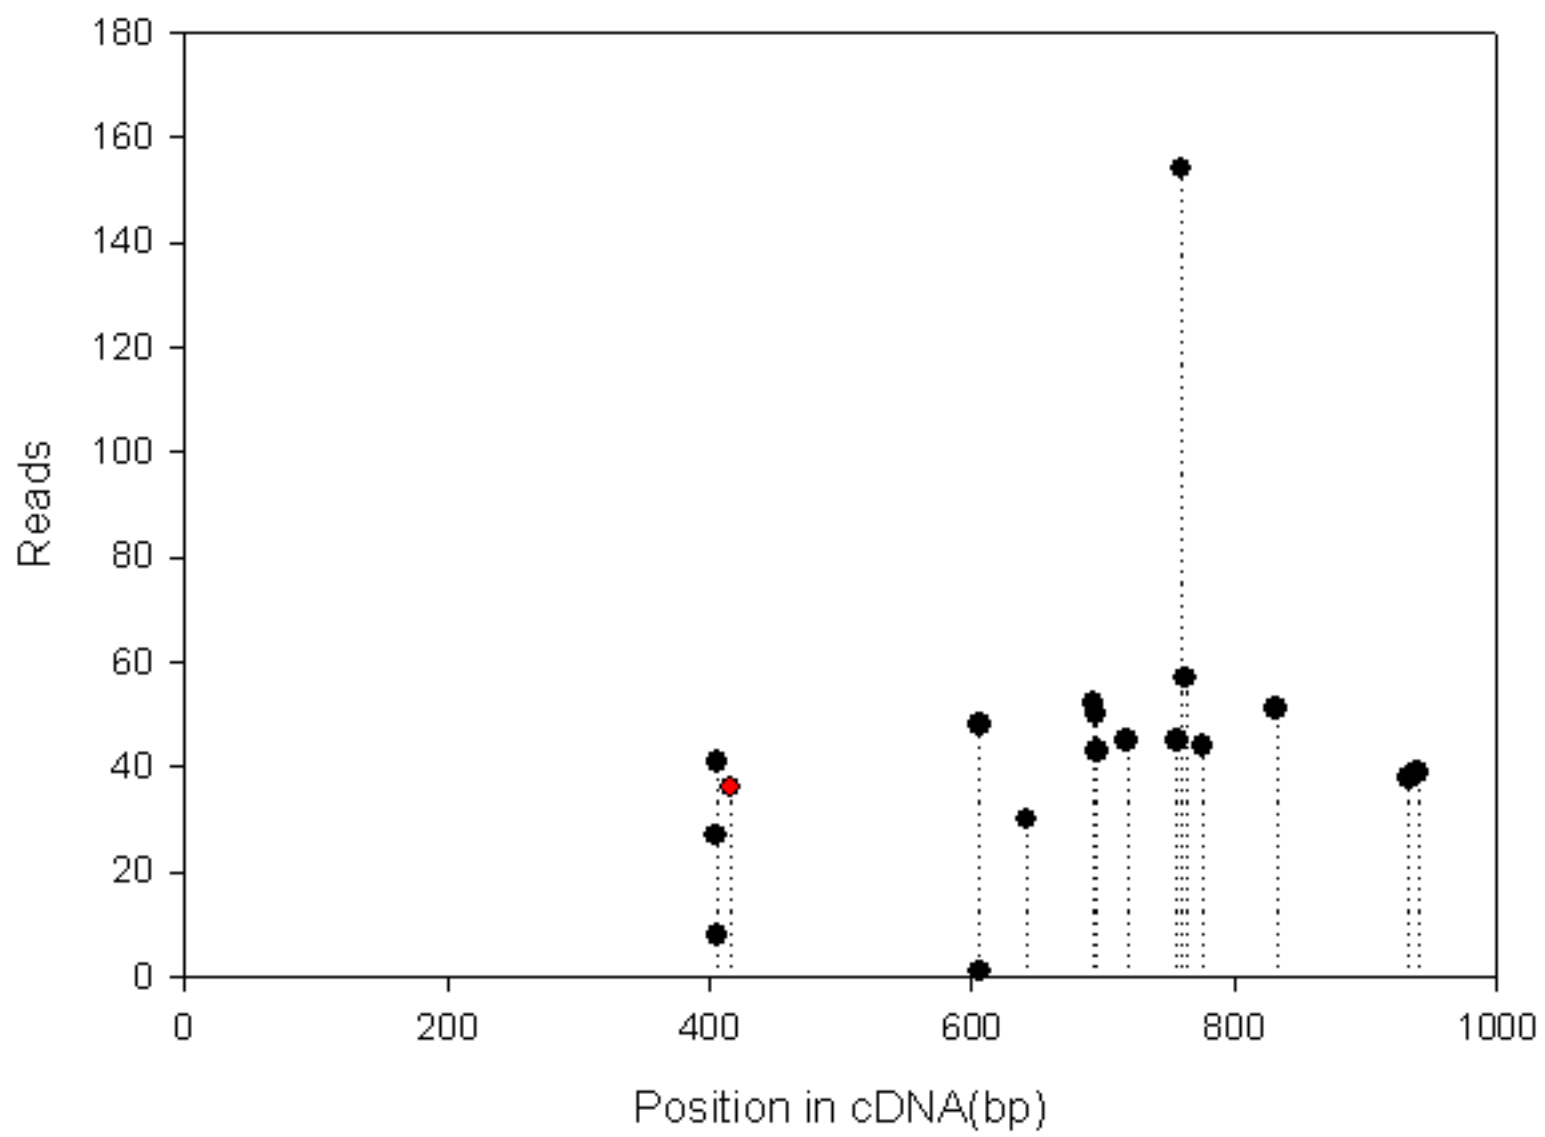

```

5' UGACCCUGAUUUCUCUGUCCAAGCAA 3'      Cs1g09600.1
   : : : : : : : : : : : : : : : :
3' ACUGGCACUAAAGAGACAGGUU---- 5'      Csi-miR3954a
  
```

Csi-miR3954a, target=Cs5g04670.1 gene=Cs5g04670  
 Category:2  
 Score=1  
 Cleavage Site=142

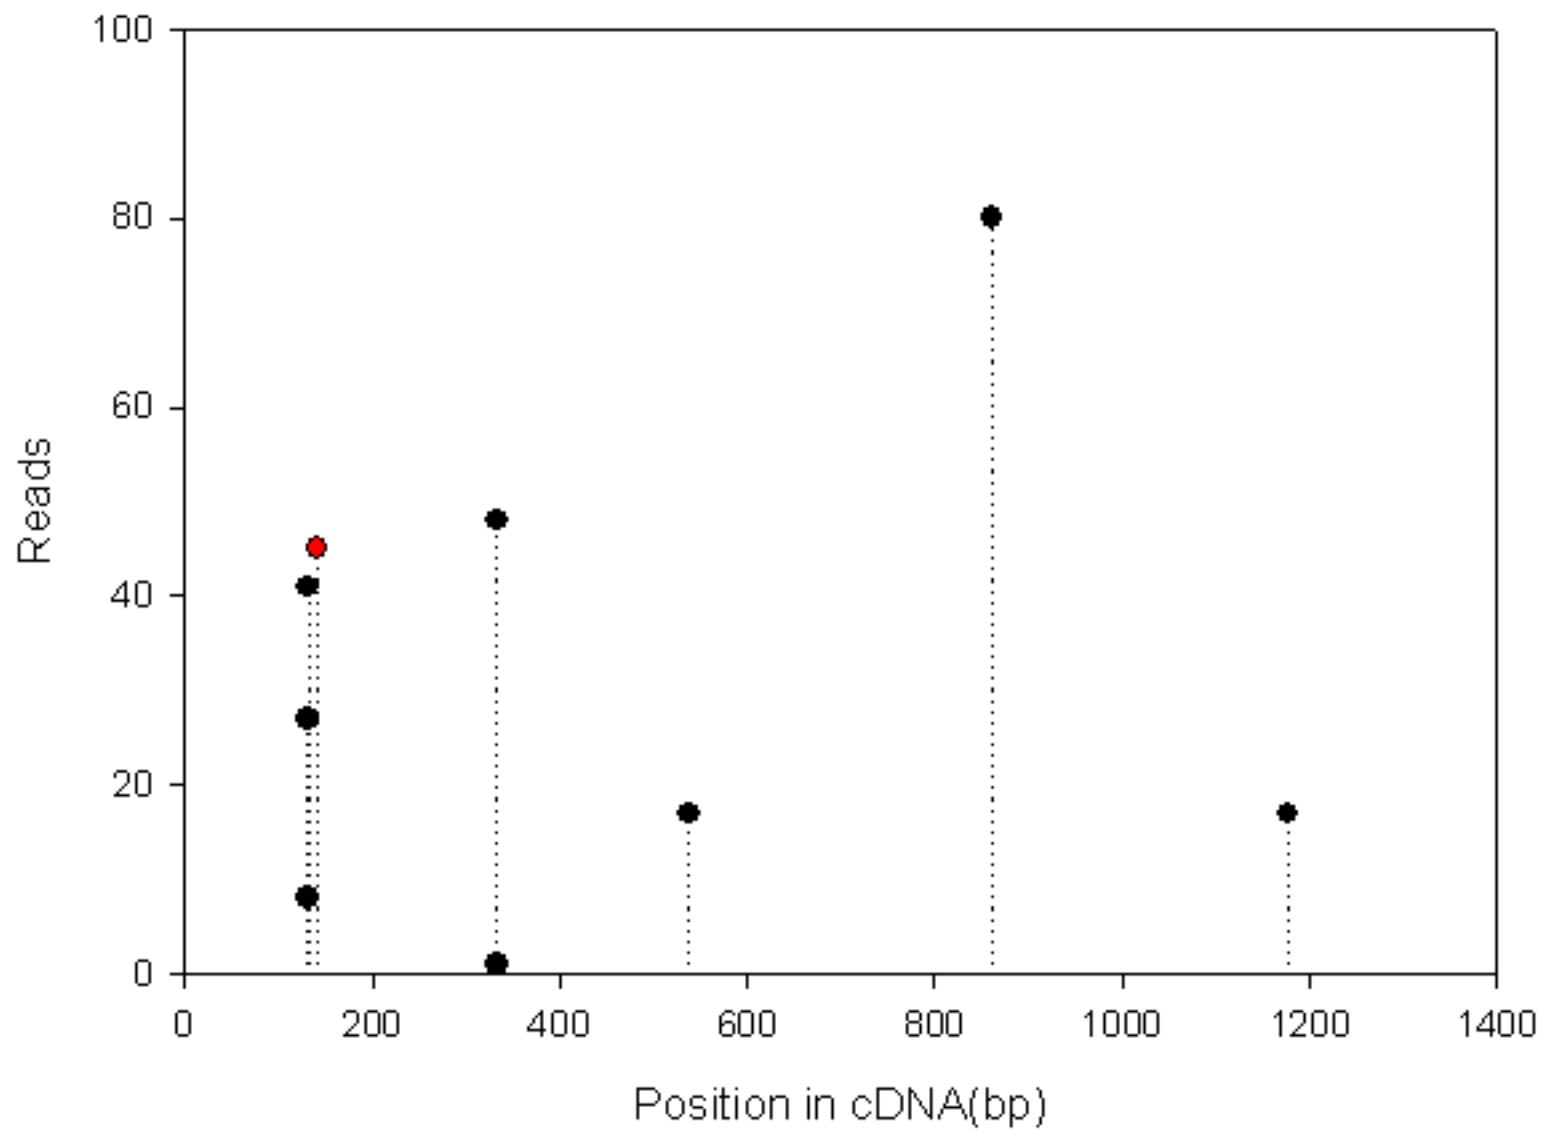

```

5' UGACCCUGAUUUCUCUGUCCAAACAA 3'      Cs5g04670.1
   ::::: :::::::::::::::::::::
3' ACUGGCACUAAAGAGACAGGUU---- 5'      Csi-miR3954a
  
```

Csi-miR3954b, target=Cs1g09600.1 gene=Cs1g09600  
 Category:3  
 Score=1  
 Cleavage Site=416

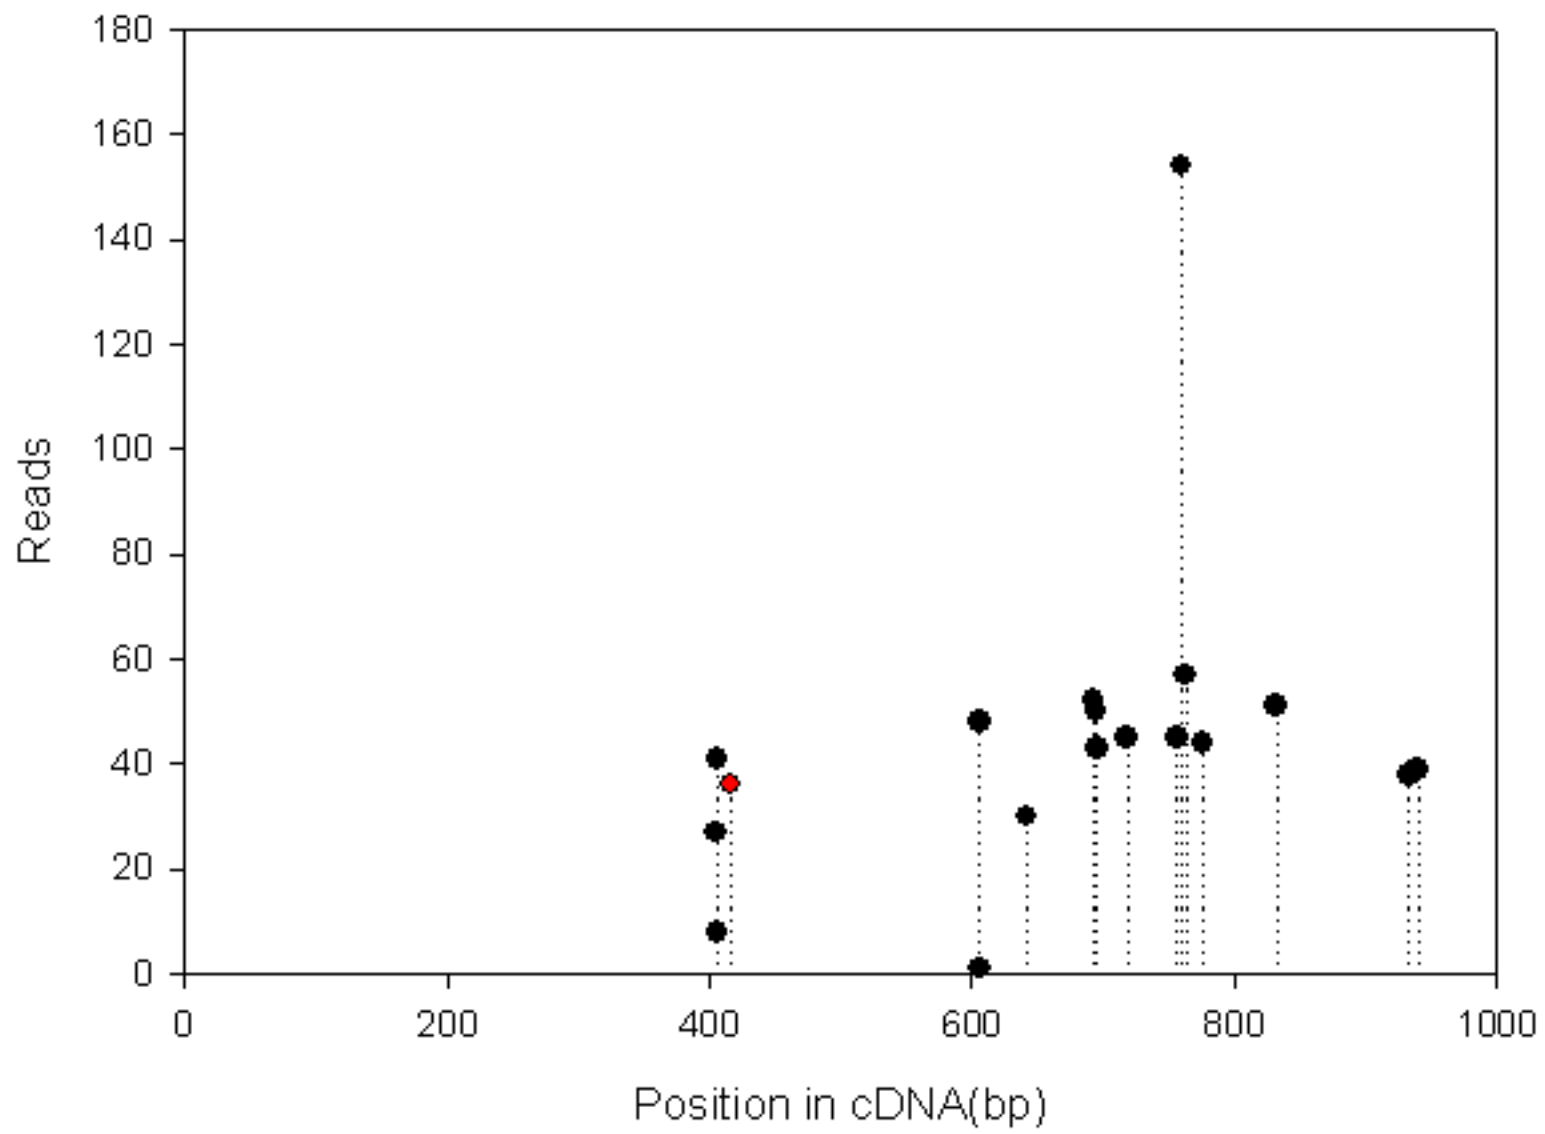

```

5' UGACCCUGAUUUCUCUGUCCAAGCAA 3'      Cs1g09600.1
   : : : : : : : : : : : : : : : :
3' ACUGGCACUAAAGAGACAGG----- 5'      Csi-miR3954b
  
```

Csi-miR3954b, target=Cs2g28990.1 gene=Cs2g28990  
 Category:3  
 Score=4.5  
 Cleavage Site=1505

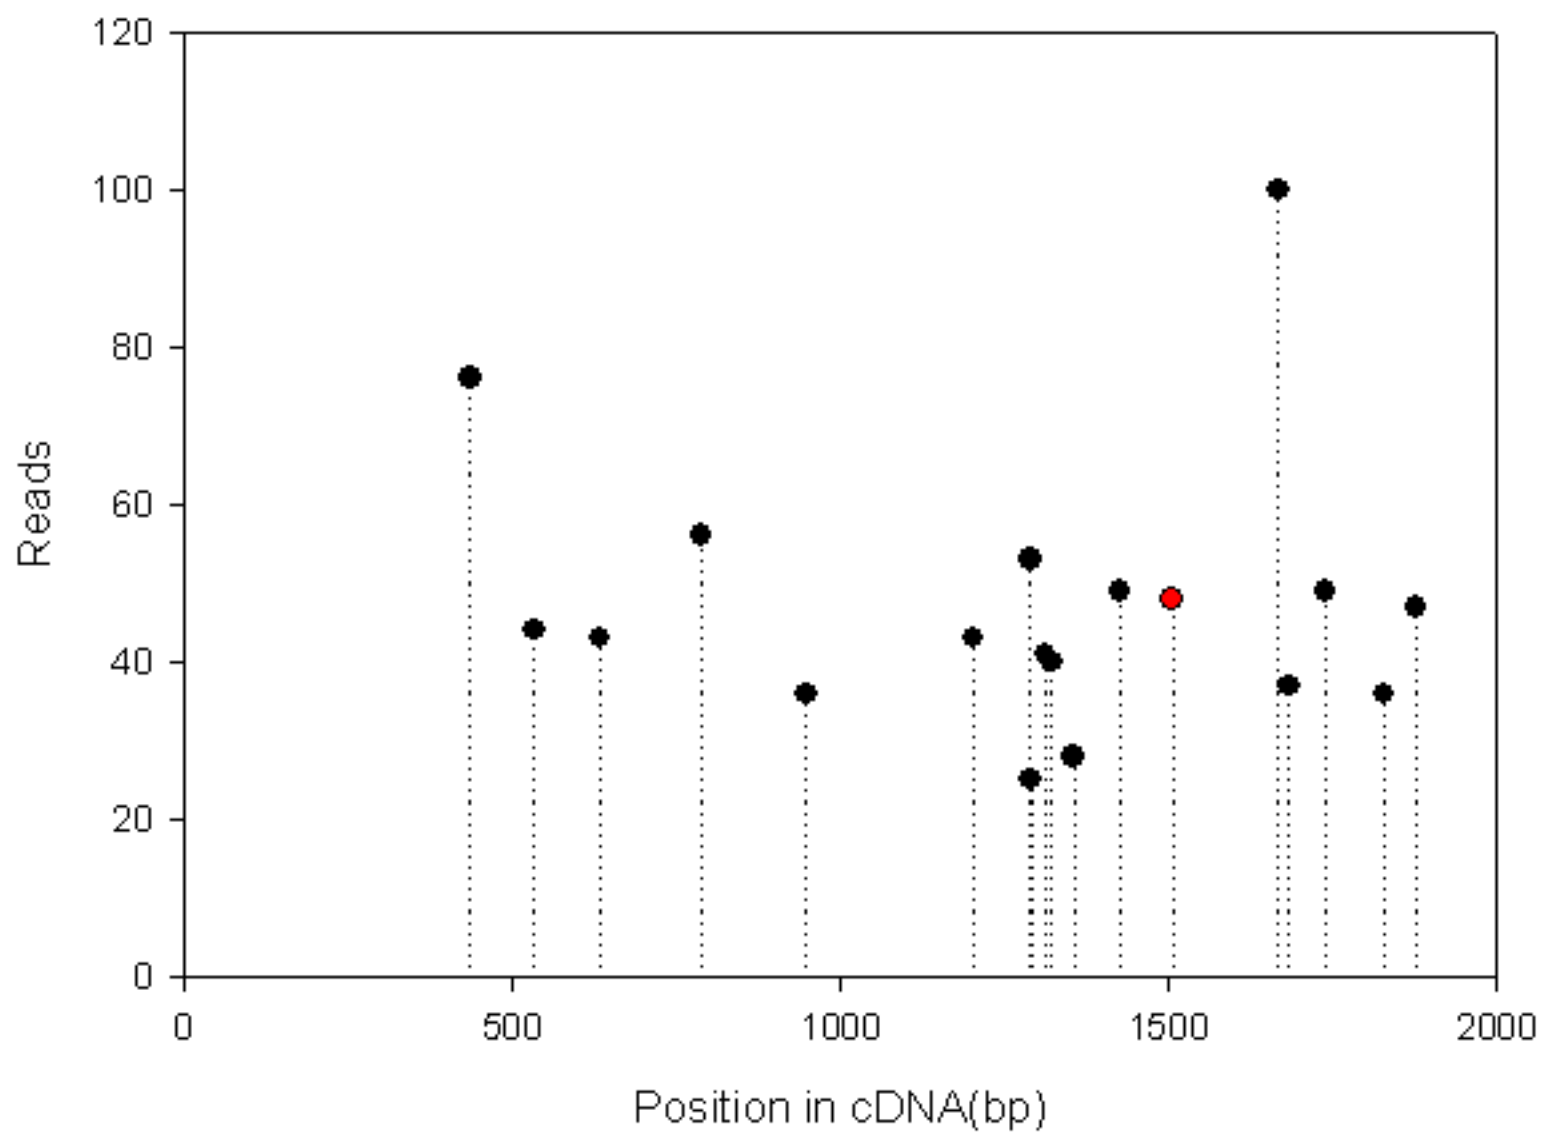

```

5' UGAGU-UGAUUUCUUUGUCAAAAGGAC 3'      Cs2g28990.1
   : : : . : : : : : : : : : : : : :
3' ACUGGCACUAAAGAGACAGG----- 5'      Csi-miR3954b
  
```

Csi-miR3954b, target=Cs5g04670.1 gene=Cs5g04670  
 Category:2  
 Score=1  
 Cleavage Site=142



```

5' UGACCCUGAUUUCUCUGUCCAAACAA 3'      Cs5g04670.1
   ::::: ::::::::::::::::::::
3' ACUGGCACUAAAGAGACAGG----- 5'      Csi-miR3954b
  
```



Csi-miR396a, target=Cs3g07260.1 gene=Cs3g07260  
 Category:3  
 Score=5  
 Cleavage Site=2418

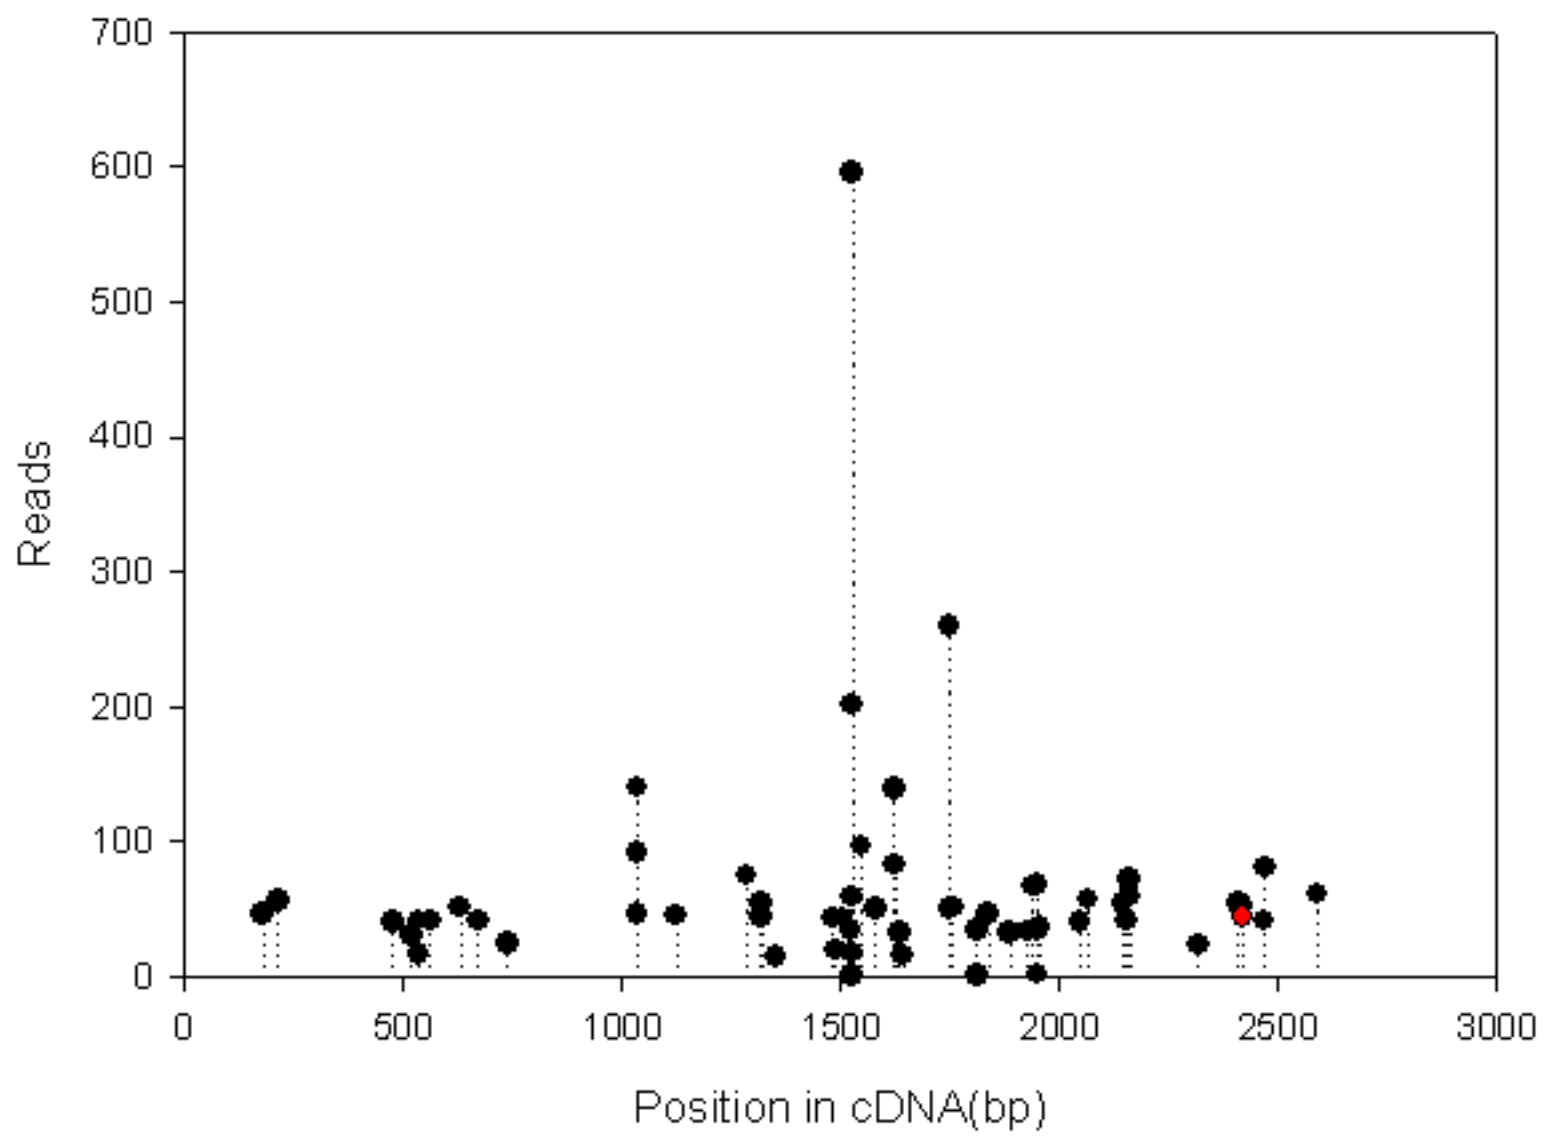

```

5' UUAUUC CAGGAAAGUUGUGGGAUAAA 3'      Cs3g07260.1
   . : : : : : : : : : : : : : : : :
3' -GUCAAGUUCUUUCGACACCUU----- 5'      Csi-miR396a
  
```

Csi-miR396a, target=Cs3g23180.1 gene=Cs3g23180  
 Category: 3  
 Score=4  
 Cleavage Site=625

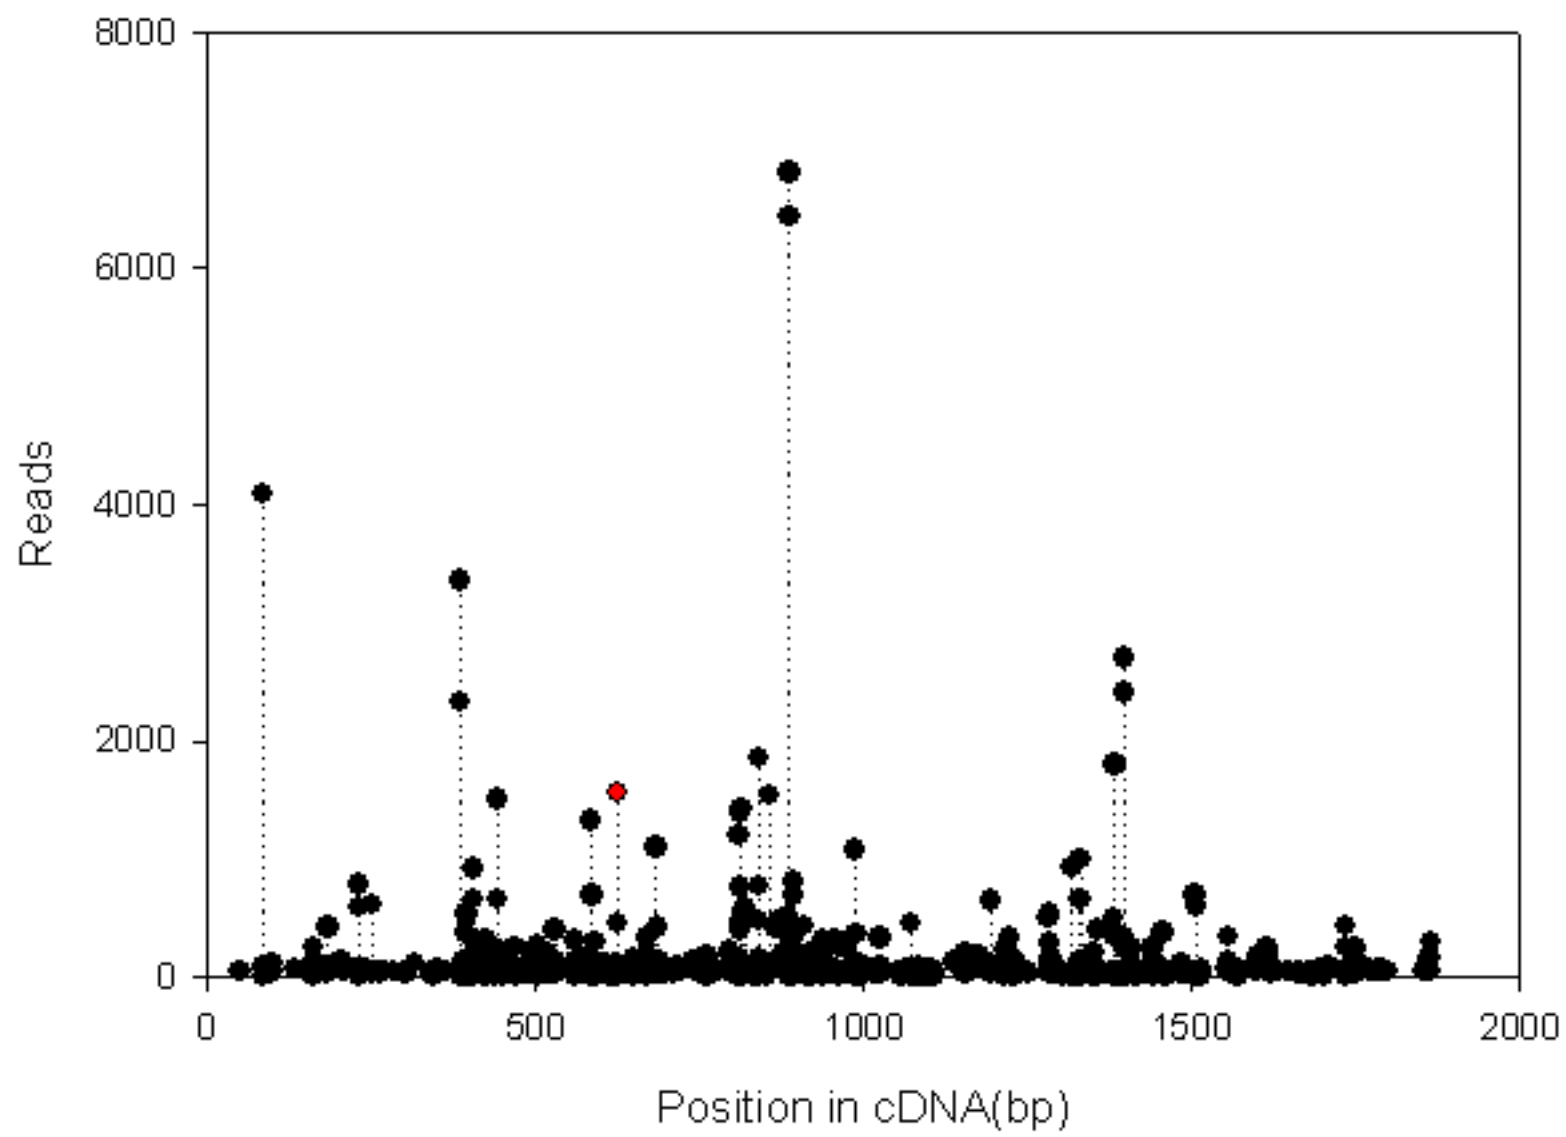

```

5' AAAGAUCAAGGAAGCUGUGGGAGUUG 3'      Cs3g23180.1
   :: :::::.....:
3' -GUCAAGUUCUUUCGACACCUU---- 5'      Csi-miR396a
  
```

Csi-miR396a, target=Cs5g01380.1 gene=Cs5g01380  
 Category:1  
 Score=3  
 Cleavage Site=1181

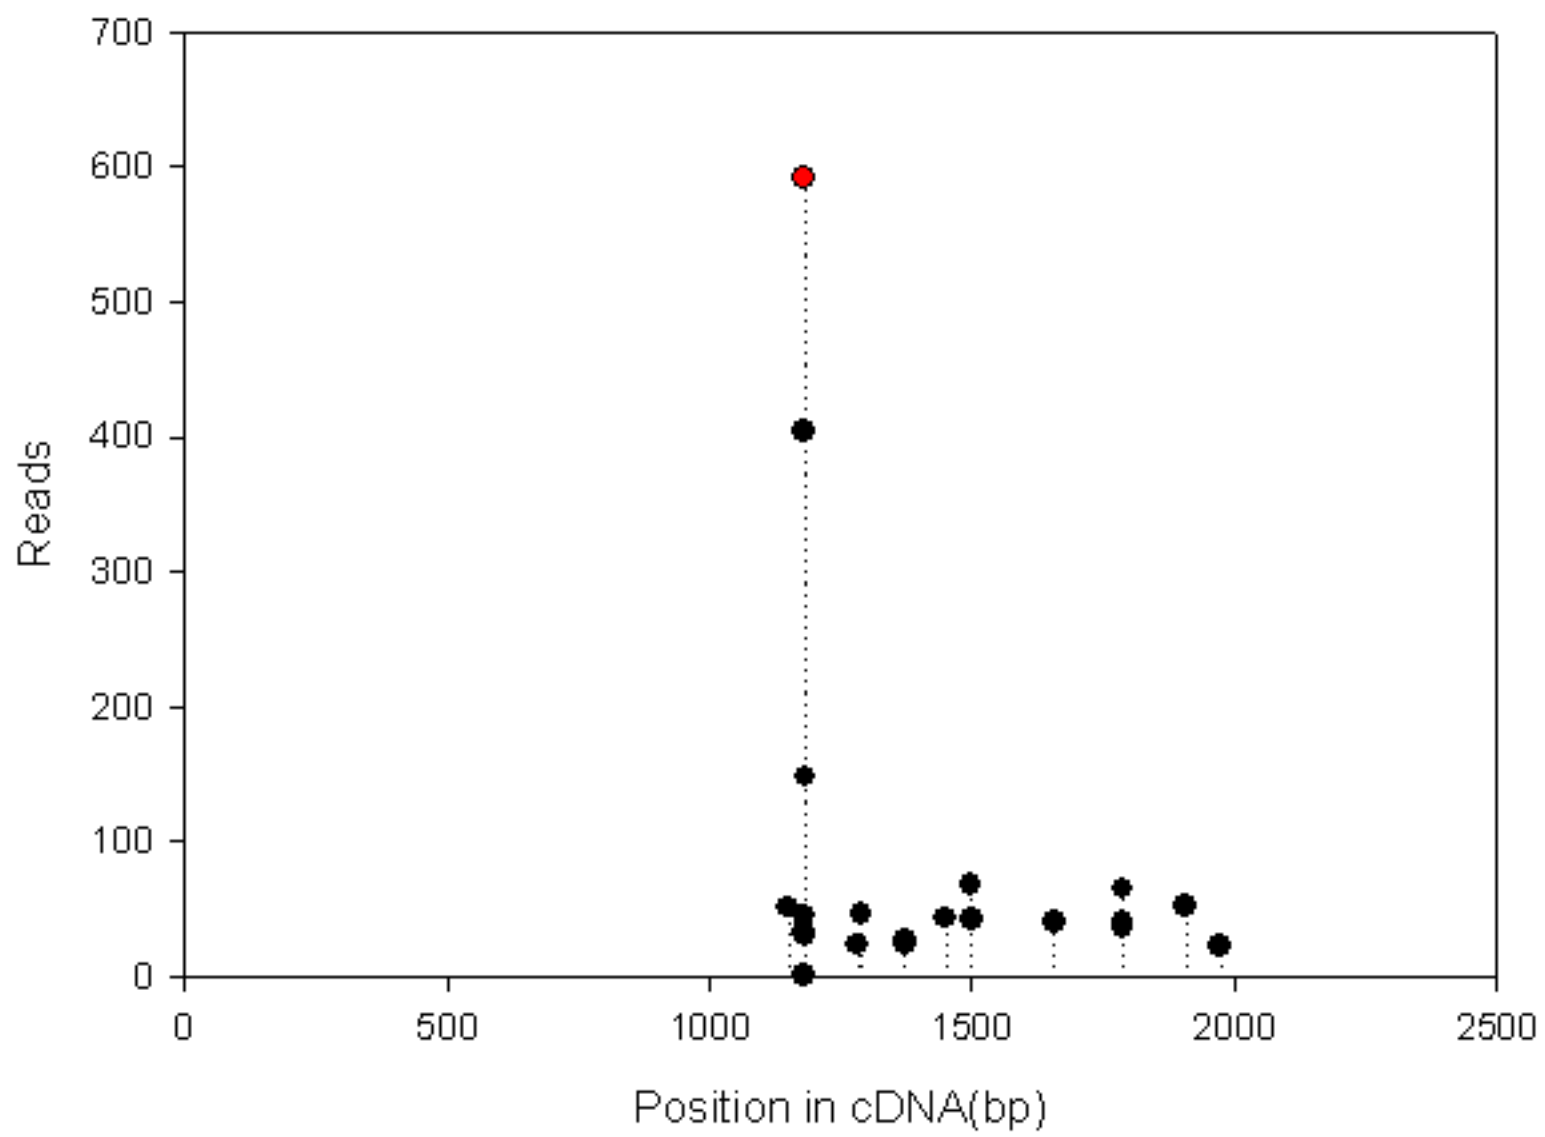

```

5' CCGUUCAAGAAAGCCUGUGGAAUUA 3'      Cs5g01380.1
   : : : : : : : : : : : : : : : :
3' -GUCAAGUUCUUUC-GACACCUU--- 5'      Csi-miR396a
  
```

Csi-miR396a, target=Cs5g19200.1 gene=Cs5g19200  
 Category:2  
 Score=4.5  
 Cleavage Site=201

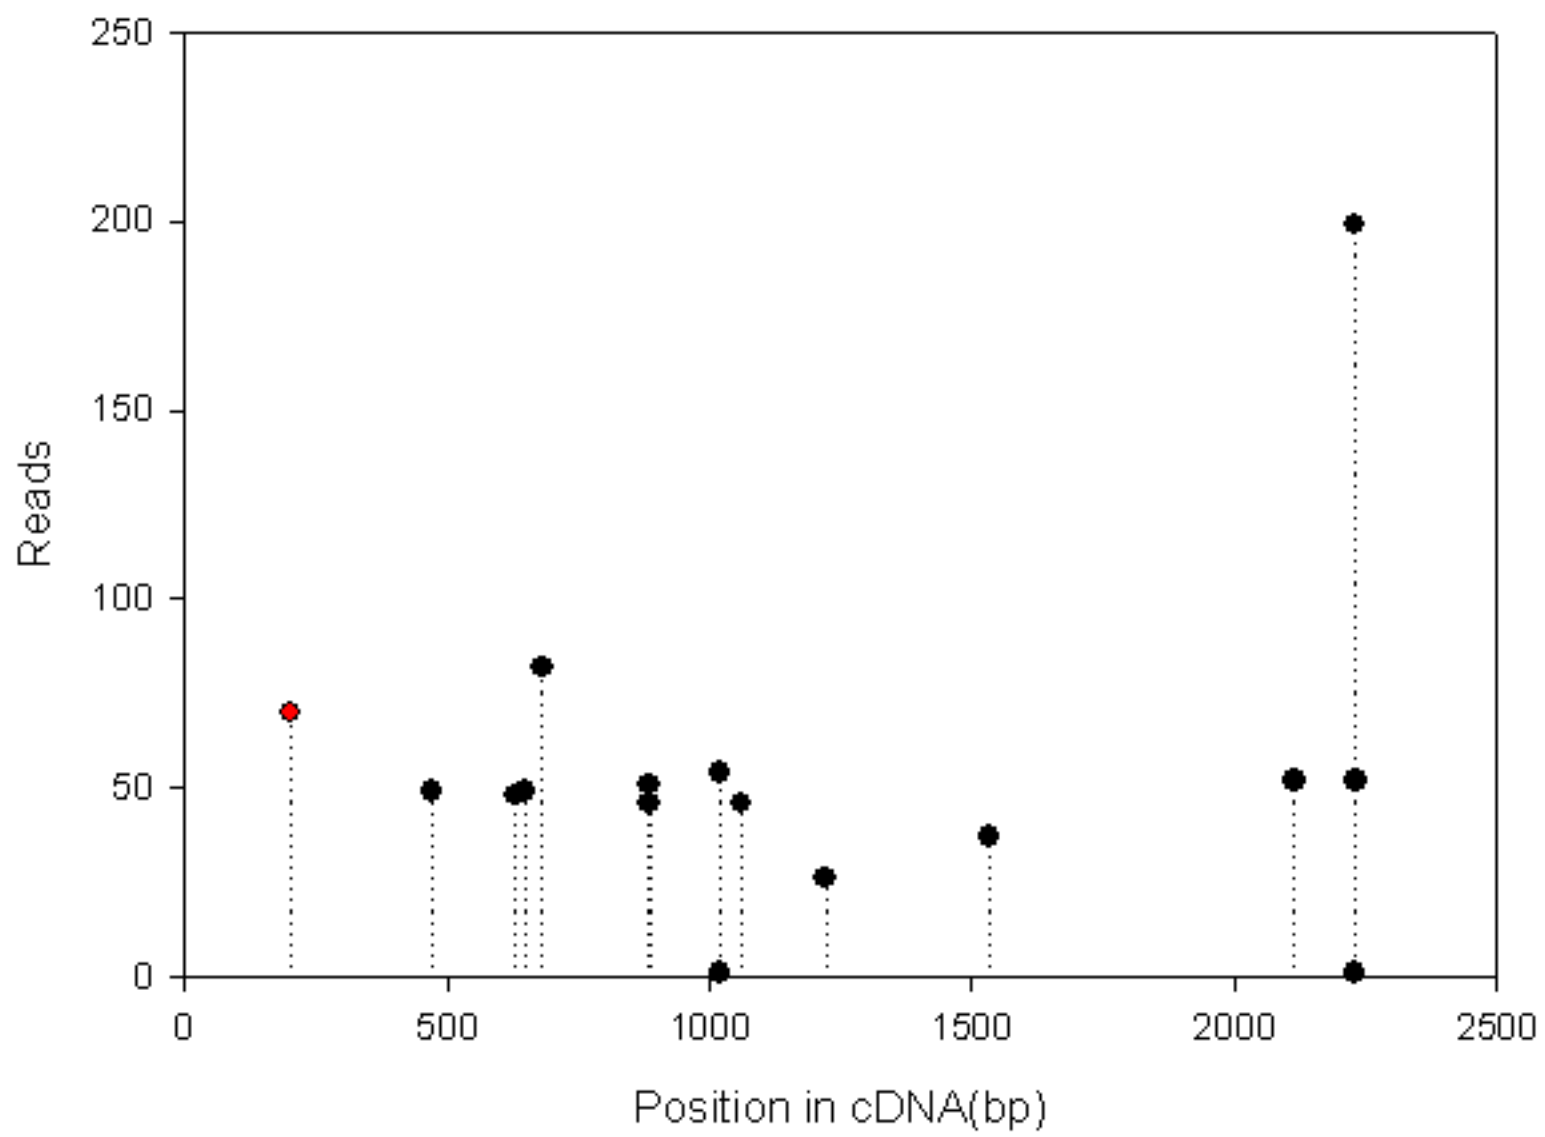

```

5' AAUGUUUAAGAAAGCAGUGGAAGCAA 3'      Cs5g19200.1
   : : : : : : : : : : : : : : : :
3' -GUCAAGUUCUUUCGACACCUU----- 5'    Csi-miR396a
  
```

Csi-miR396a, target=Cs7g12930.1 gene=Cs7g12930  
 Category:1  
 Score=4  
 Cleavage Site=1079

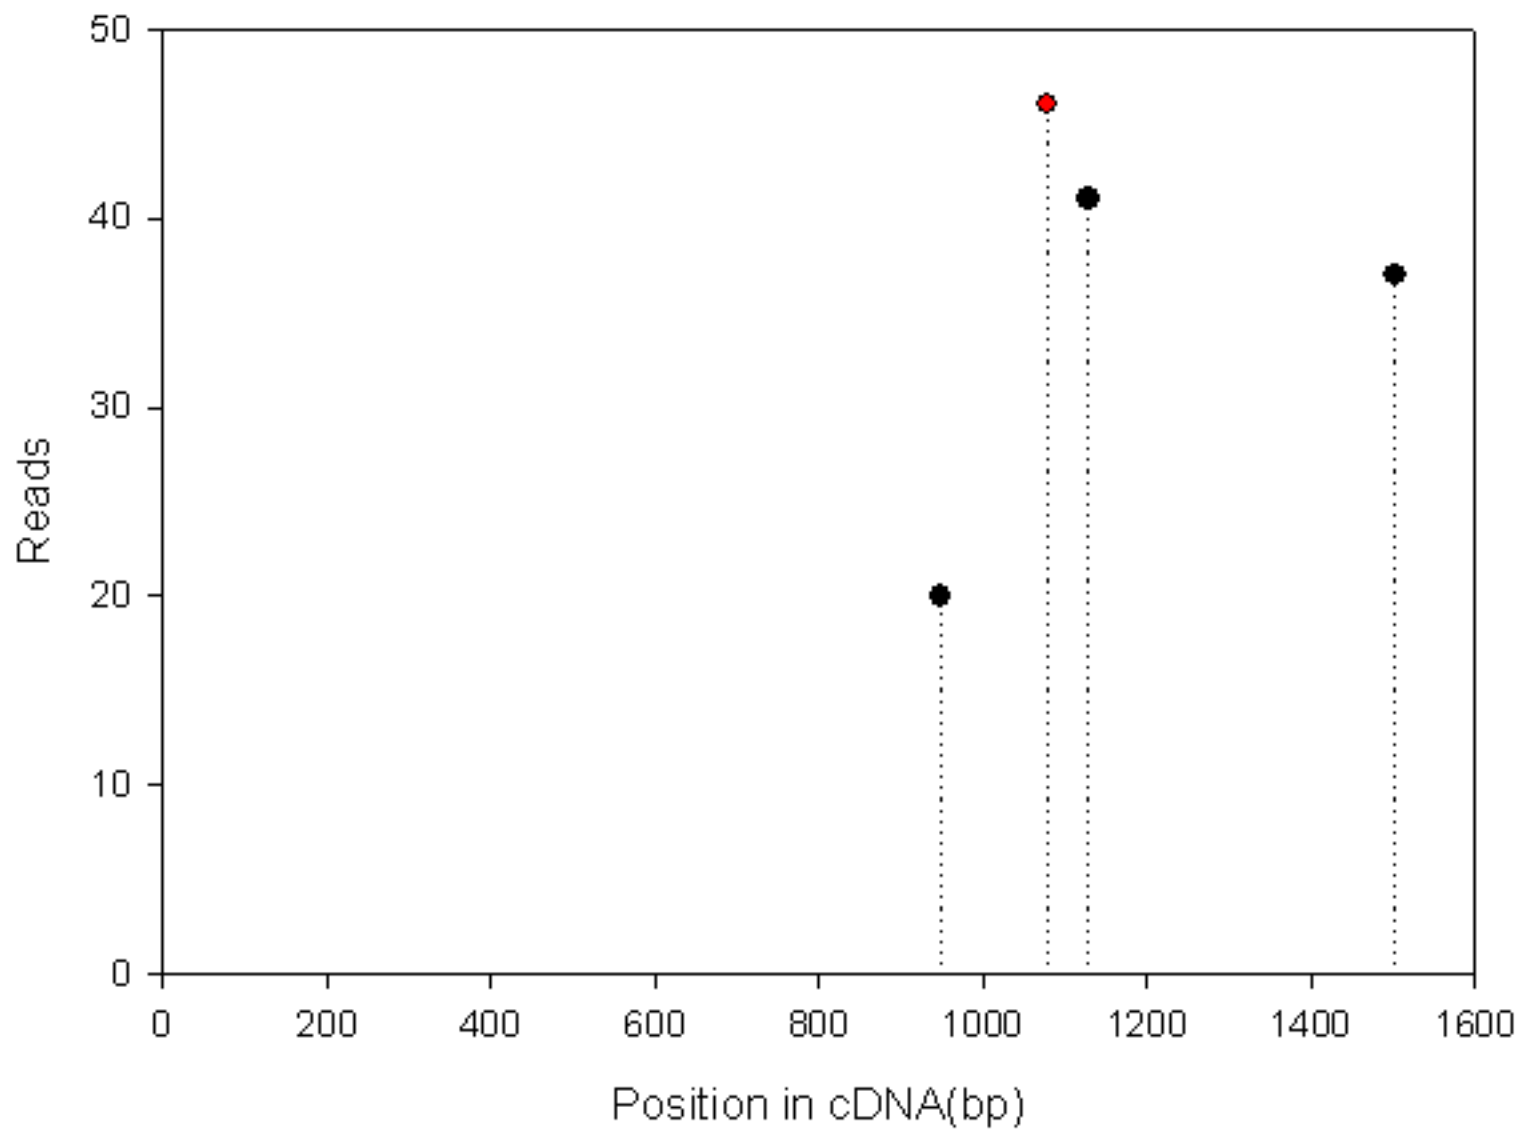

```

5' UAGUUAUUAAGAAAGCUGAGGAAAAAG 3'      Cs7g12930.1
   .:.:. .:.:.:.:.:.:.:.:.:. .:.:.
3' GUCA-AGUUCUUUCGACACCUU----- 5'      Csi-miR396a
  
```

Csi-miR396a, target=Cs7g15220.1 gene=Cs7g15220  
Category:1  
Score=3  
Cleavage Site=377

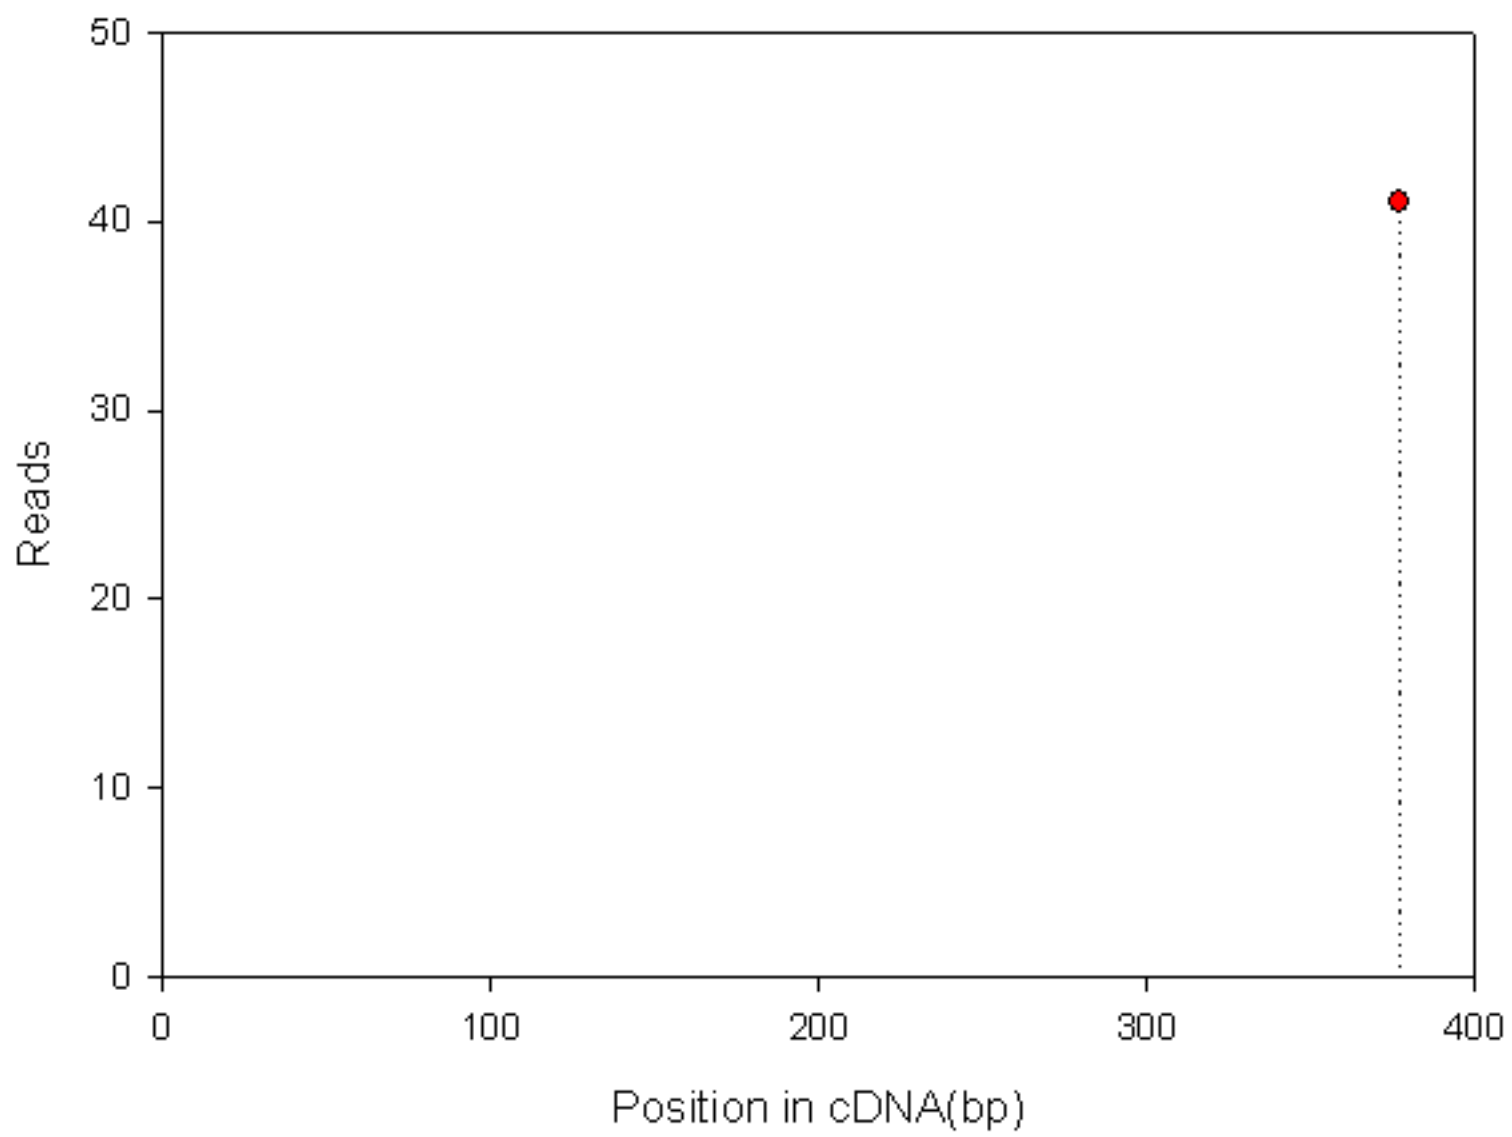

```
5' ACCGUUCAAGAAAGCCUGUGGAAUCA 3'      Cs7g15220.1
   : : : : : : : : : : : : : : : :
3' -GUCAAGUUCUUUC-GACACCUU--- 5'      Csi-miR396a
```

Csi-miR396a, target=Orange1.1t02254.1 gene=Orange1.1t02254  
 Category:3  
 Score=4  
 Cleavage Site=1371

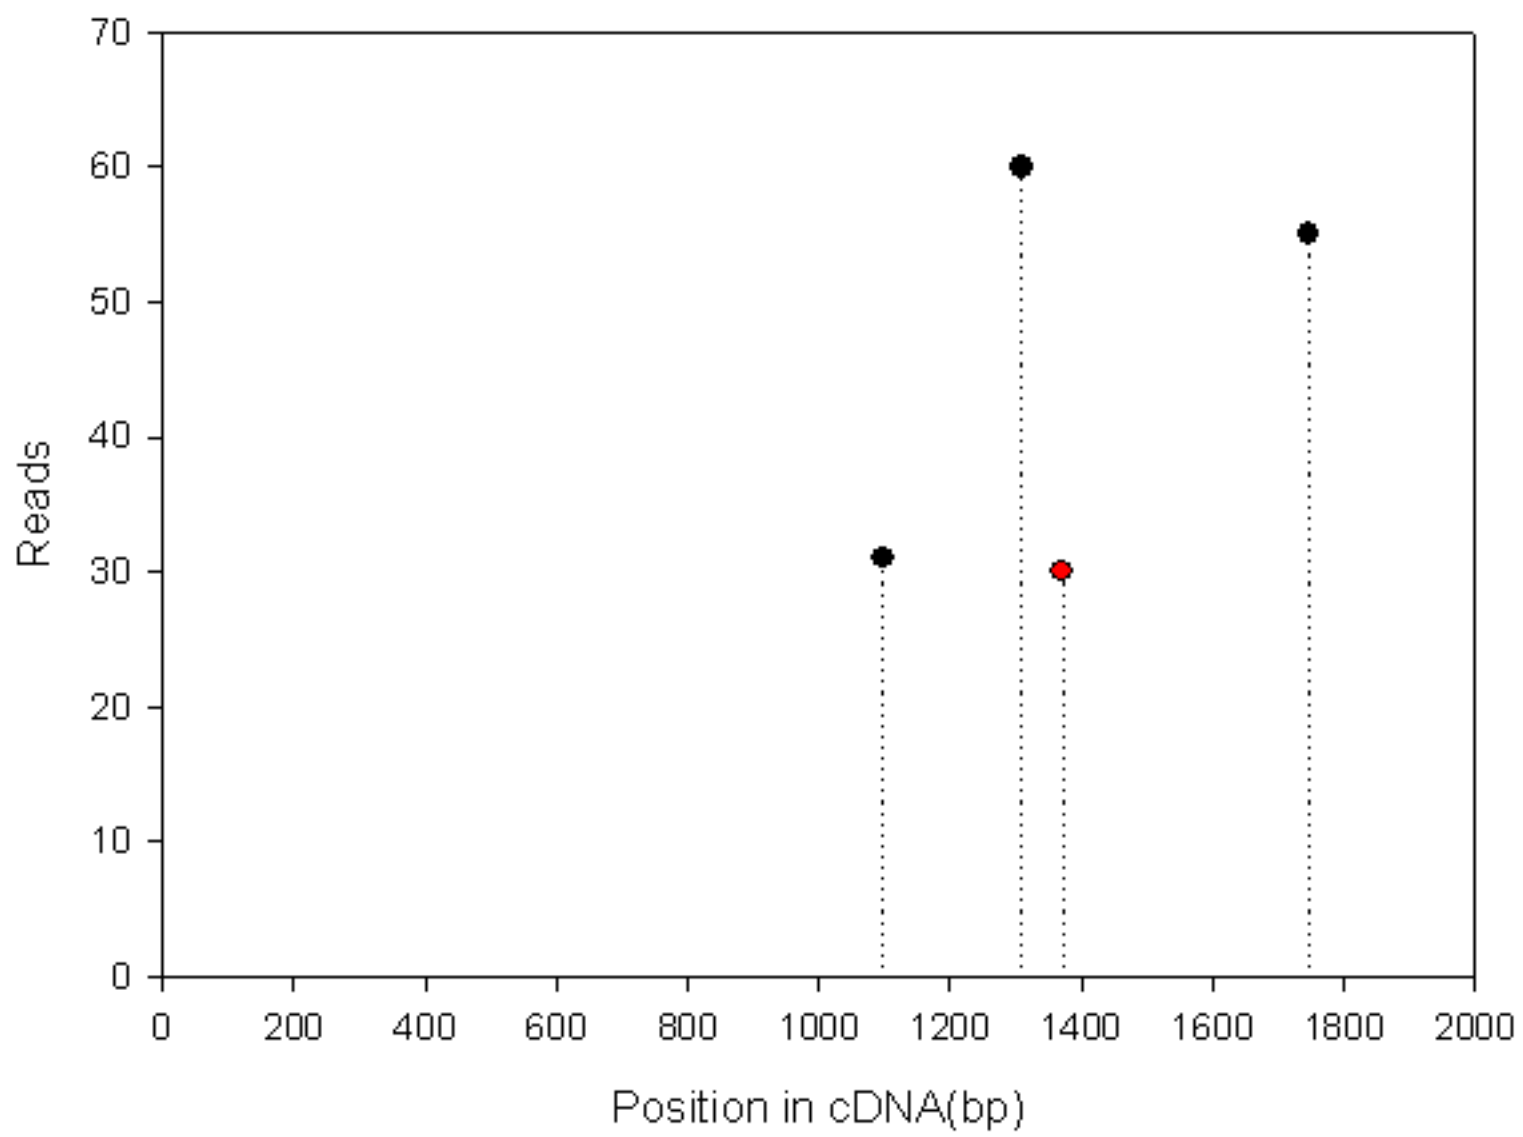

5' GUUGCUGAAGAAAGCUGUGGAGGAUC 3'  
 . : : : : : : : : : : : : : : .  
 3' -GUCAAGUUCUUUCGACACCUU----- 5'

Orange1.1t02254.1

Csi-miR396a

Csi-miR396a, target=Orange1.1t03122.1 gene=Orange1.1t03122  
 Category:2  
 Score=3  
 Cleavage Site=583

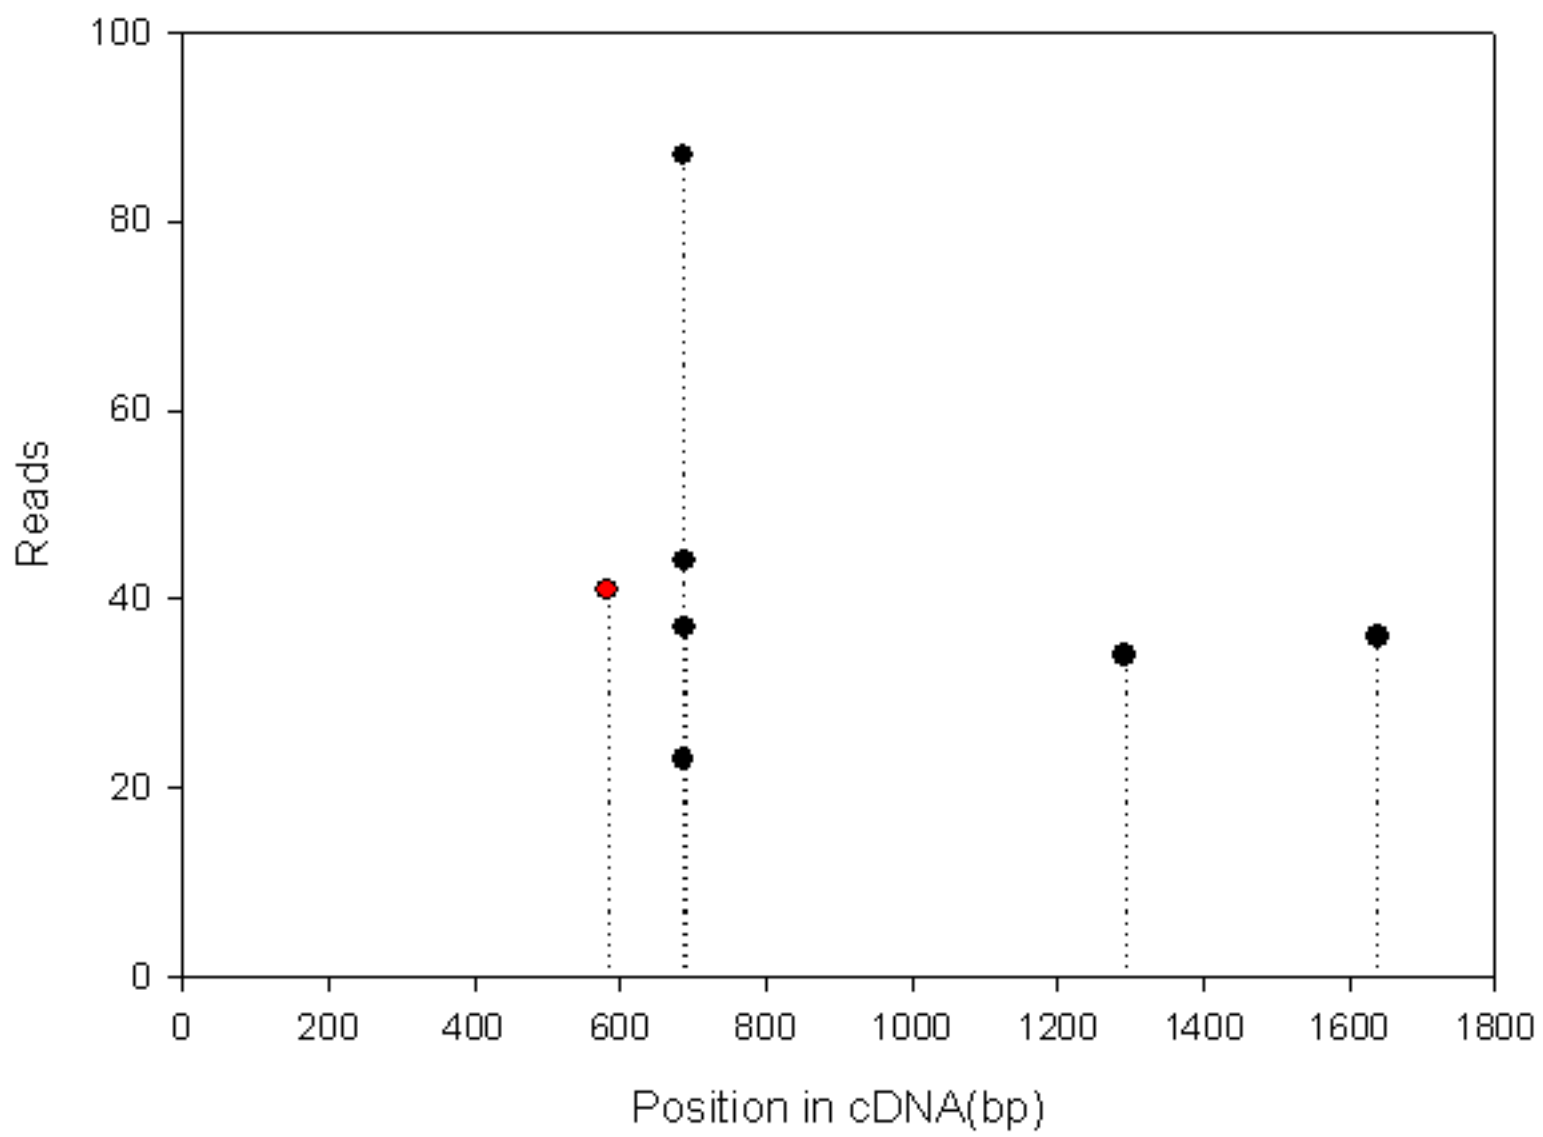

5' ACCGUUCAAGAAAGCCUGUGGAAUCA 3'  
 : :::::::::::::: ::::::::::  
 3' -GUCAAGUUCUUUC-GACACCUU--- 5'

Orange1.1t03122.1  
 Csi-miR396a



Csi-miR396b.1, target=Cs3g07260.1 gene=Cs3g07260  
 Category:3  
 Score=4.5  
 Cleavage Site=2420

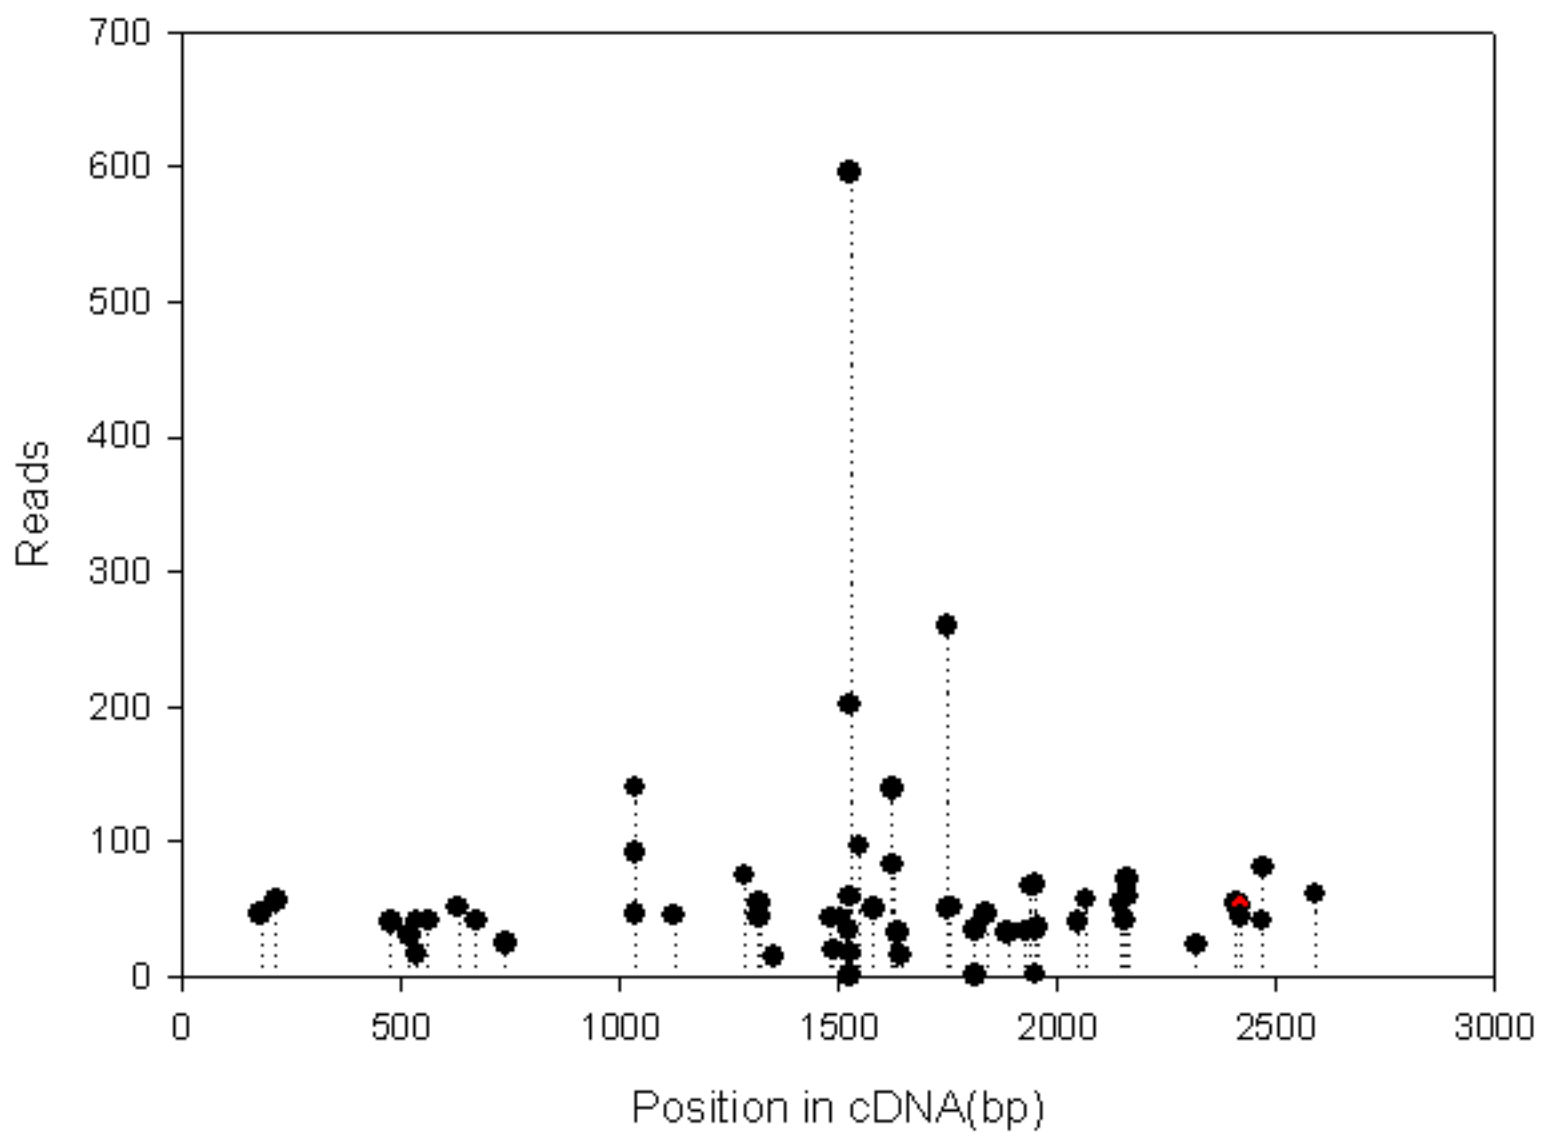

```

5' AUUCCAGGAAAGUUGUGGGGAUAAAUA 3'          Cs3g07260.1
   : : : : : : : : : : : : : : : :
3' -CAAGUUCUUUCGACACCUU----- 5'          Csi-miR396b.1
  
```

Csi-miR396b.1, target=Cs3g23180.1 gene=Cs3g23180  
 Category: 3  
 Score=3  
 Cleavage Site=625

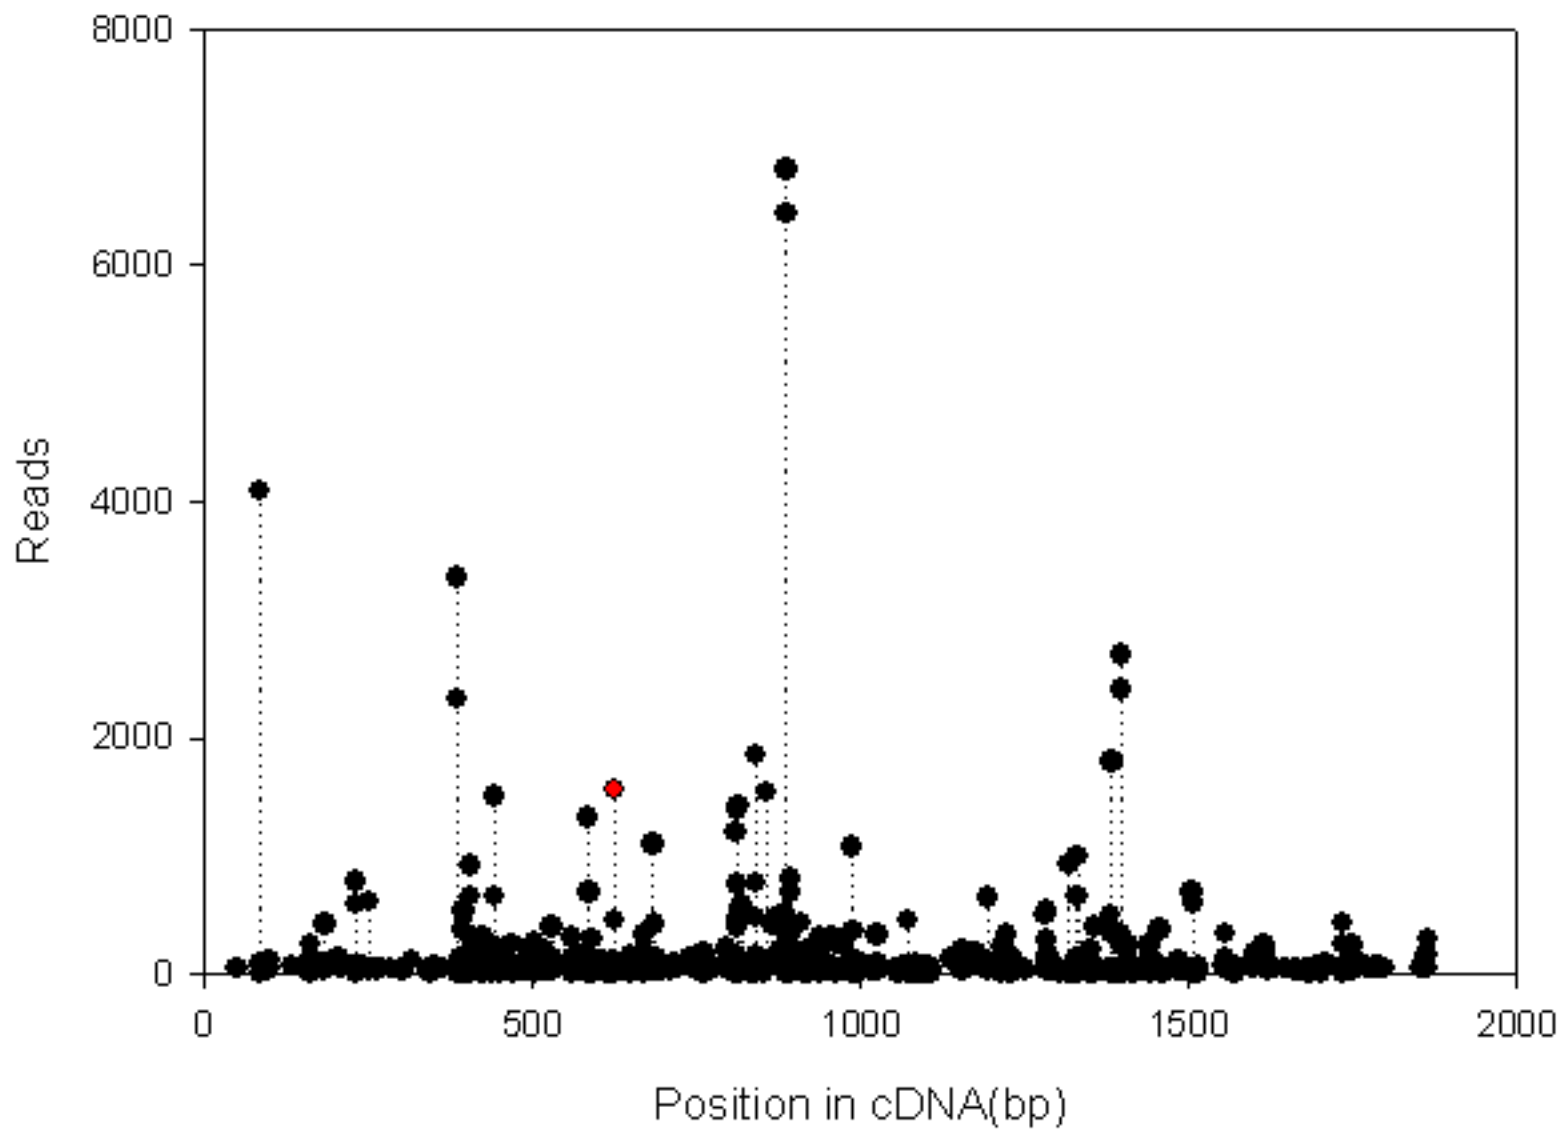

|    |                                             |    |               |
|----|---------------------------------------------|----|---------------|
| 5' | AAAGAUCAAGGAAGCUGUGGGAGUUG                  | 3' | Cs3g23180.1   |
|    | : : : : : . : : : : : : : : : : : : : : : : |    |               |
| 3' | ---CAAGUUCUUUCGACACCUU---                   | 5' | Csi-miR396b.1 |

Csi-miR396b.1, target=Cs5g01380.1 gene=Cs5g01380  
 Category:1  
 Score=2  
 Cleavage Site=1181

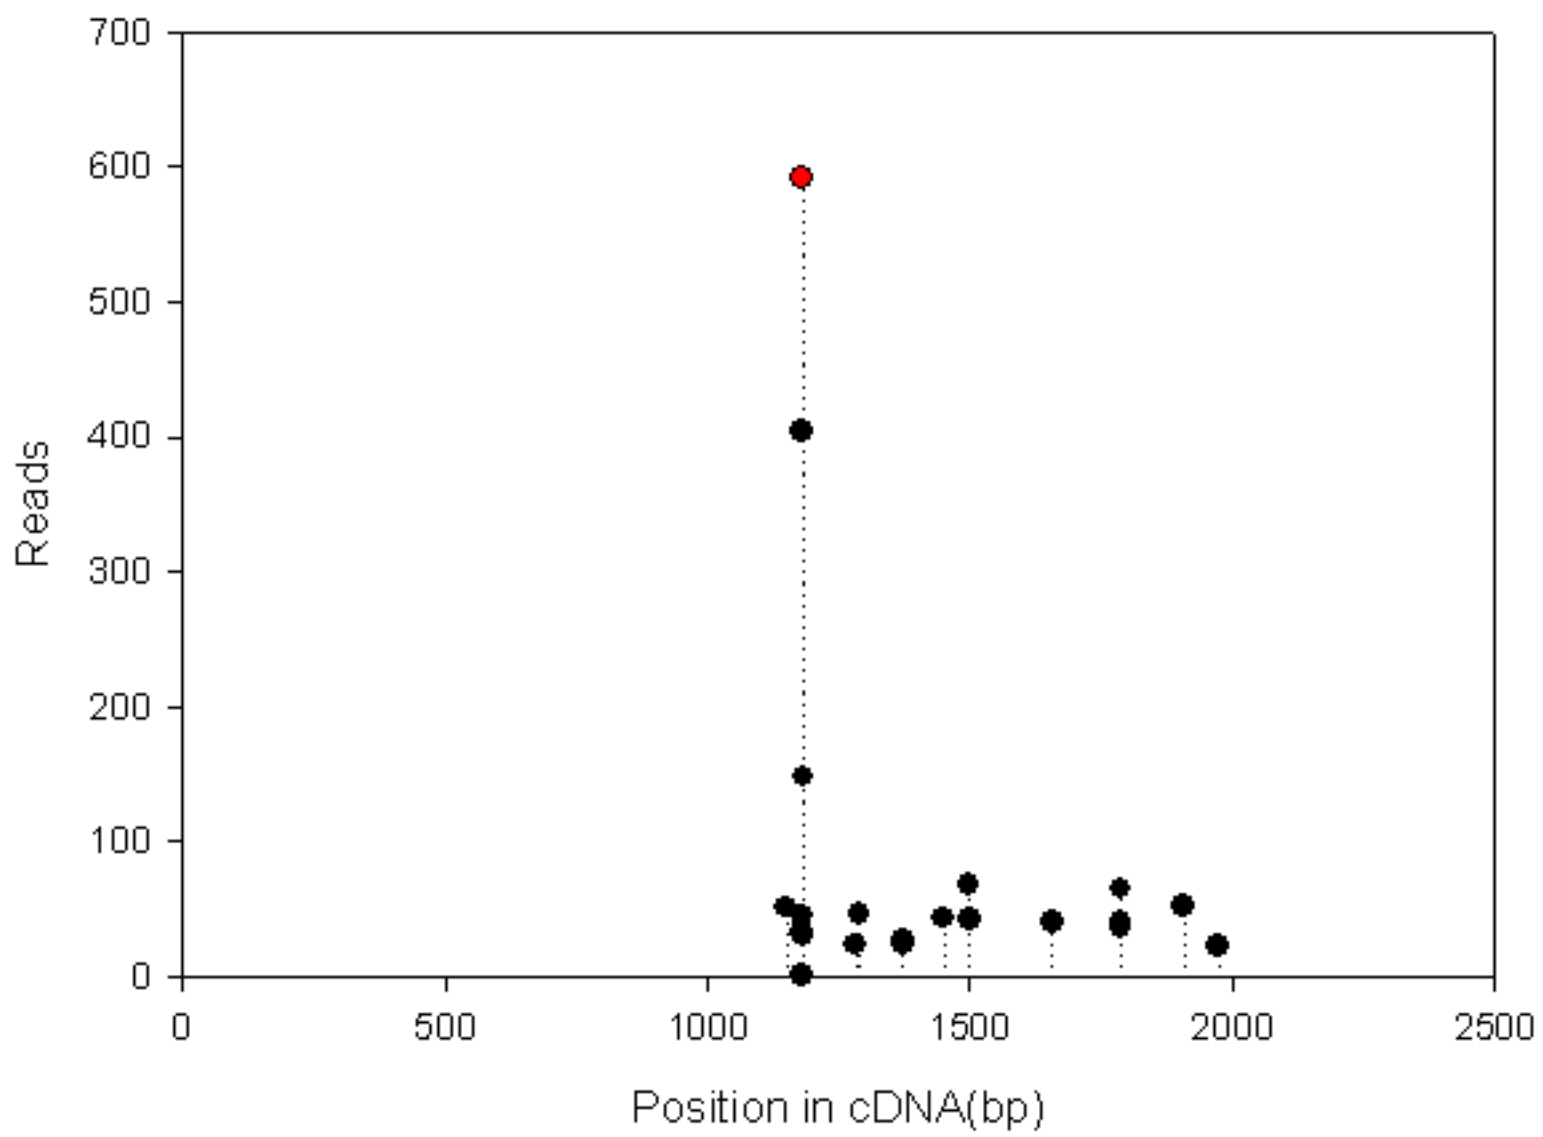

```

5' CCGUUCAAGAAAGCCUGUGGAAUUA 3'      Cs5g01380.1
   :::::::::::::: ::::::::::::::
3' ---CAAGUUCUUUC-GACACCUU--- 5'      Csi-miR396b.1

```

Csi-miR396b.1, target=Cs5g19200.1 gene=Cs5g19200  
 Category:2  
 Score=2.5  
 Cleavage Site=201

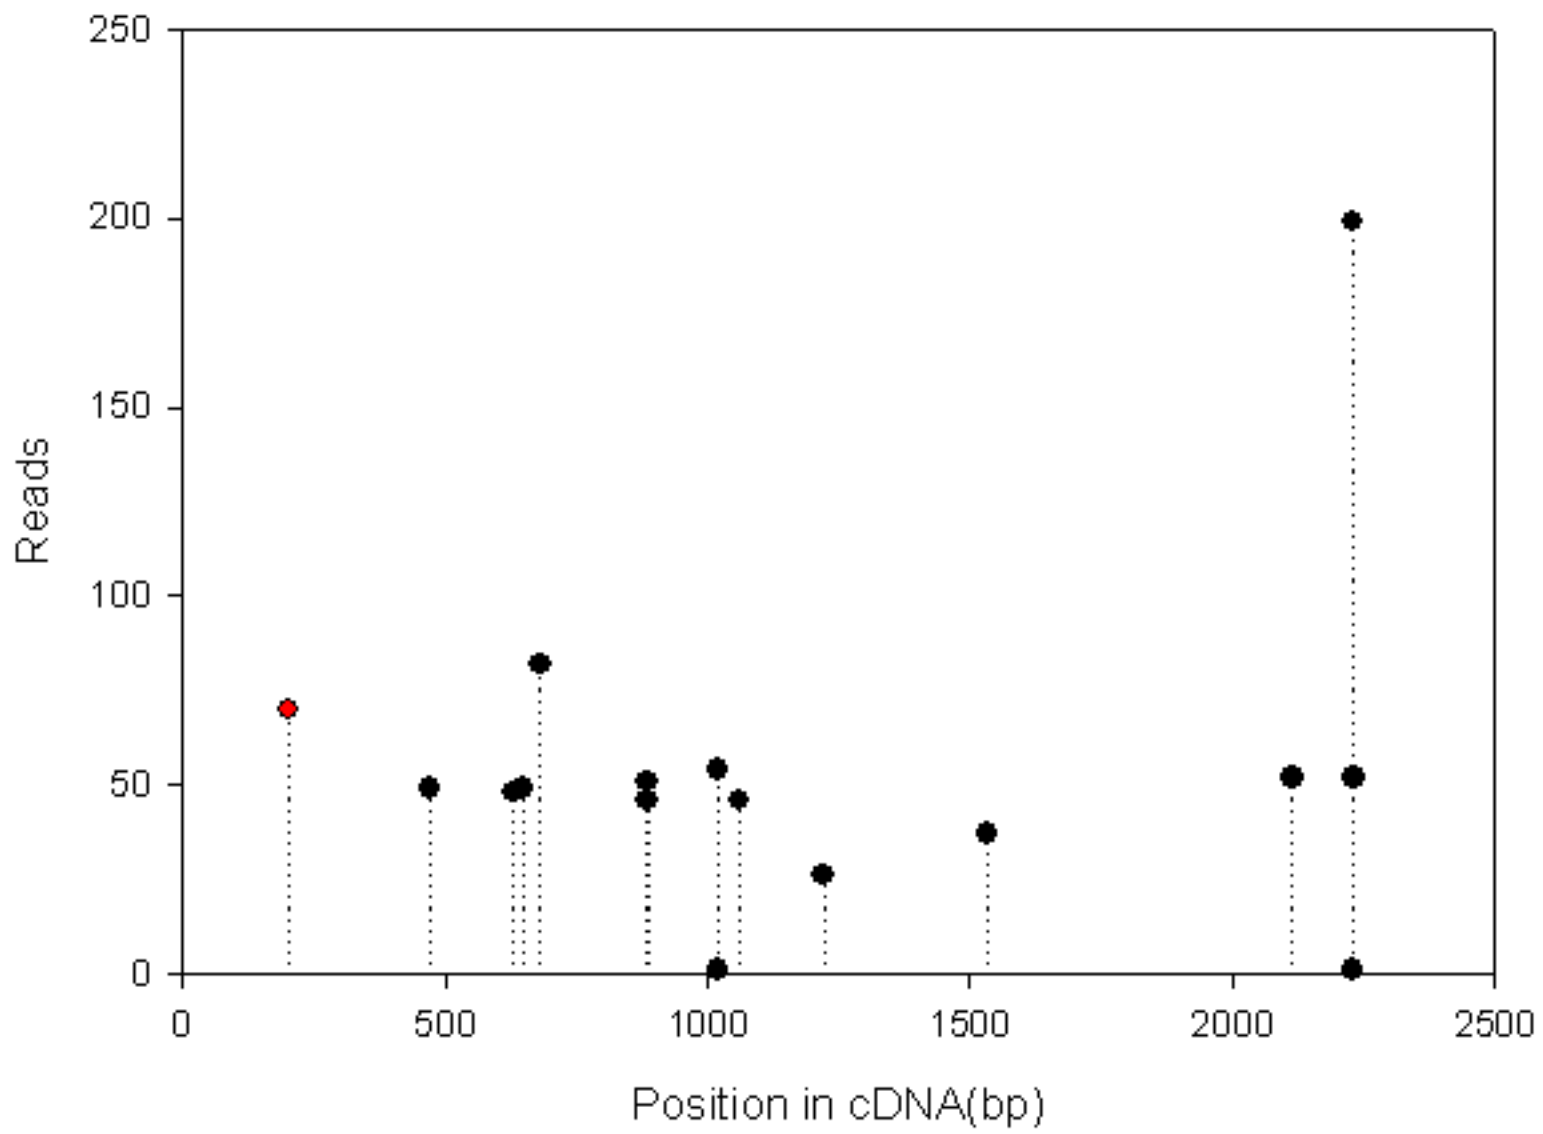

```

5' AAUGUUUAAGAAAGCAGUGGAAGCAA 3'      Cs5g19200.1
   .....
3' ---CAAGUUCUUUCGACACCUU---- 5'      Csi-miR396b.1
  
```

Csi-miR396b.1, target=Cs7g12930.1 gene=Cs7g12930  
 Category:1  
 Score=3.5  
 Cleavage Site=1079



```

5' UAGUAUUAAGAAAGCUGAGGAAAAAG 3'      Cs7g12930.1
   :: .....
3' --CA-AGUUCUUUCGACACCUU----- 5'      Csi-miR396b.1
  
```

Csi-miR396b.1, target=Cs7g15220.1 gene=Cs7g15220  
Category:1  
Score=2  
Cleavage Site=377

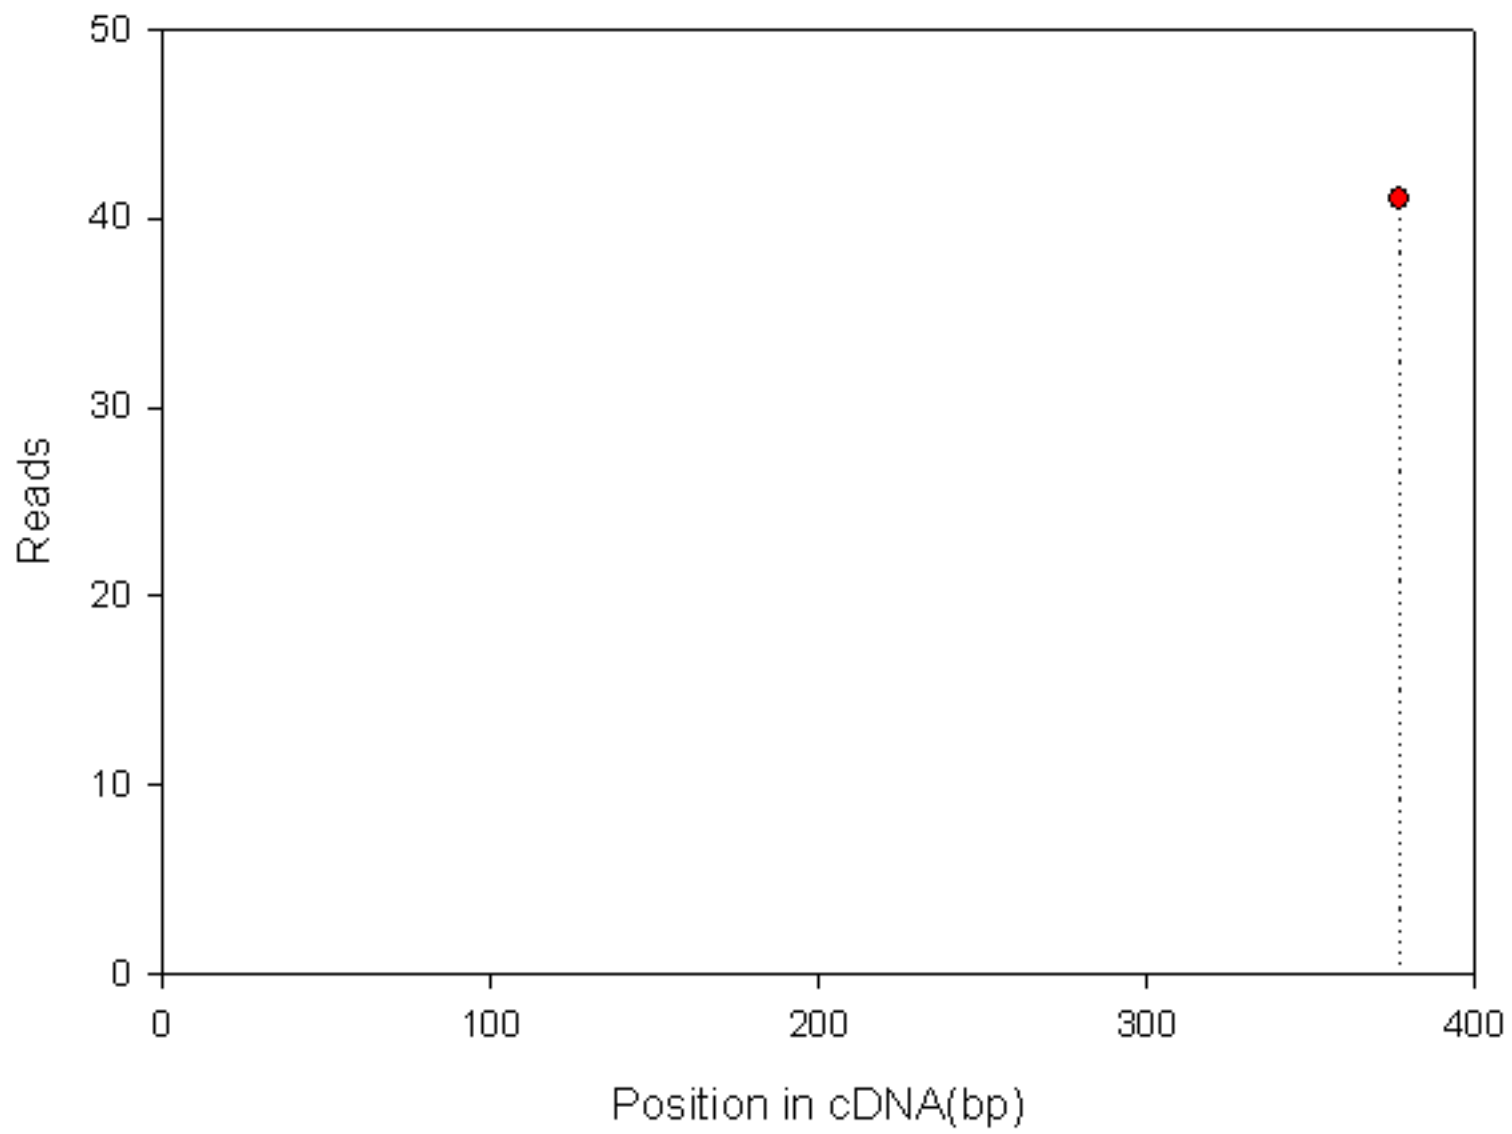

```
5' ACCGUUCAAGAAAGCCUGUGGAAUCA 3'      Cs7g15220.1
      ::::::::::::::: :::::::::::::::
3' ---CAAGUUCUUUC-GACACCUU--- 5'      Csi-miR396b.1
```

Csi-miR396b.1, target=Orange1.1t02254.1 gene=Orange1.1t02254  
 Category:3  
 Score=2.5  
 Cleavage Site=1371

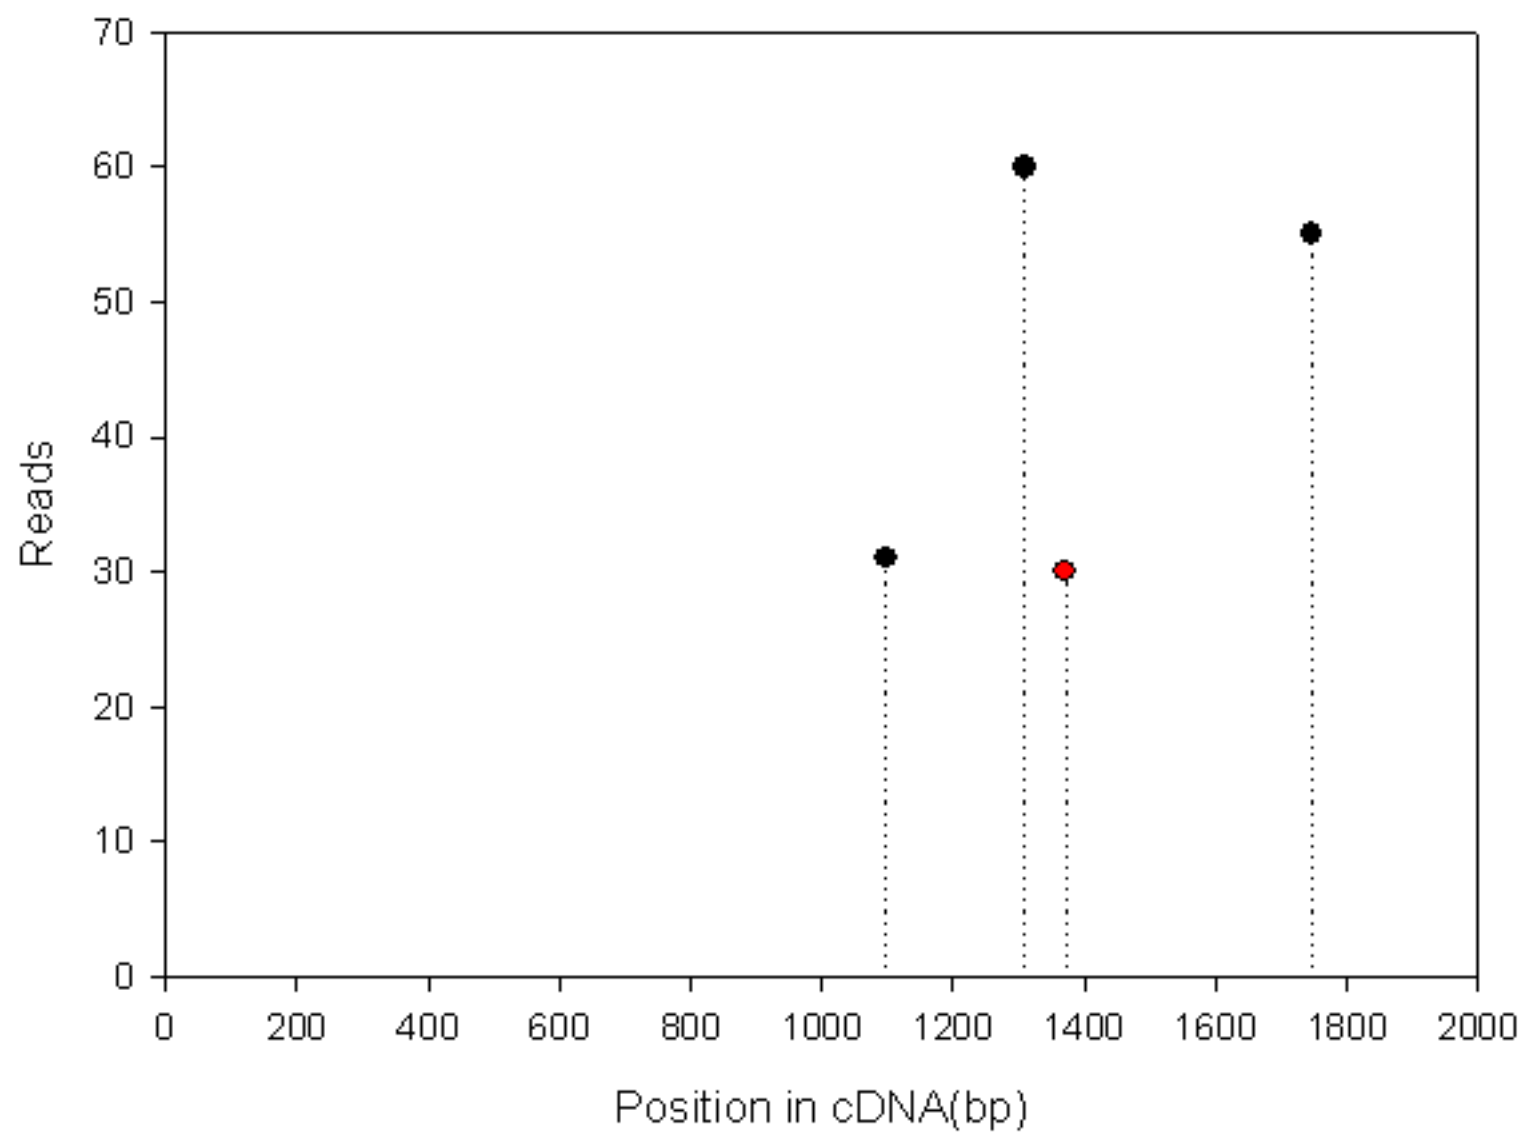

|                                  |                   |
|----------------------------------|-------------------|
| 5' GUUGCUGAAGAAAGCUGUGGAGGAUC 3' | Orange1.1t02254.1 |
| : : : : : : : : : : : : : : .    |                   |
| 3' ---CAAGUUCUUUCGACACCUU---- 5' | Csi-miR396b.1     |

Csi-miR396b.1, target=Orange1.1t02555.1 gene=Orange1.1t02555  
 Category:1  
 Score=2  
 Cleavage Site=920

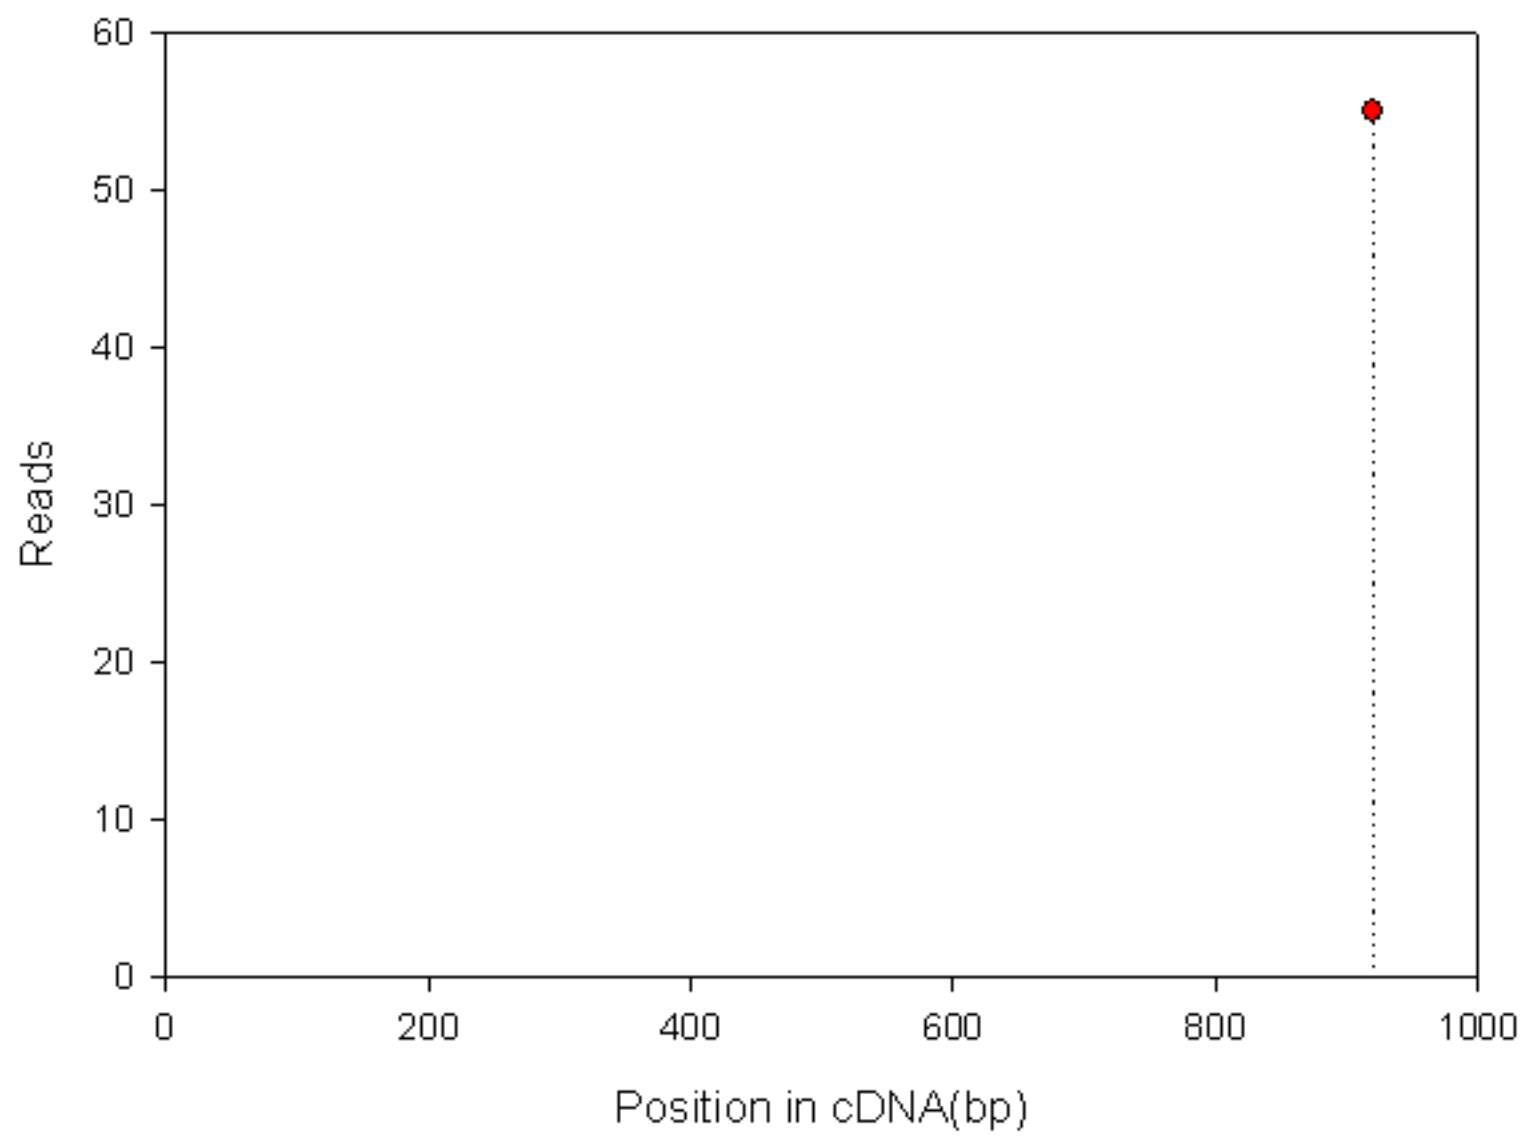

```

5' CACGUUCAAGAAAGCCUGUGGAACUU 3'      Orange1.1t02555.1
   : : : : : : : : : : : : : : : :
3' ---CAAGUUCUUUC-GACACCUU--- 5'      Csi-miR396b.1
  
```



Csi-miR396b.1, target=Orange1.1t03122.1 gene=Orange1.1t03122  
 Category:2  
 Score=2  
 Cleavage Site=583

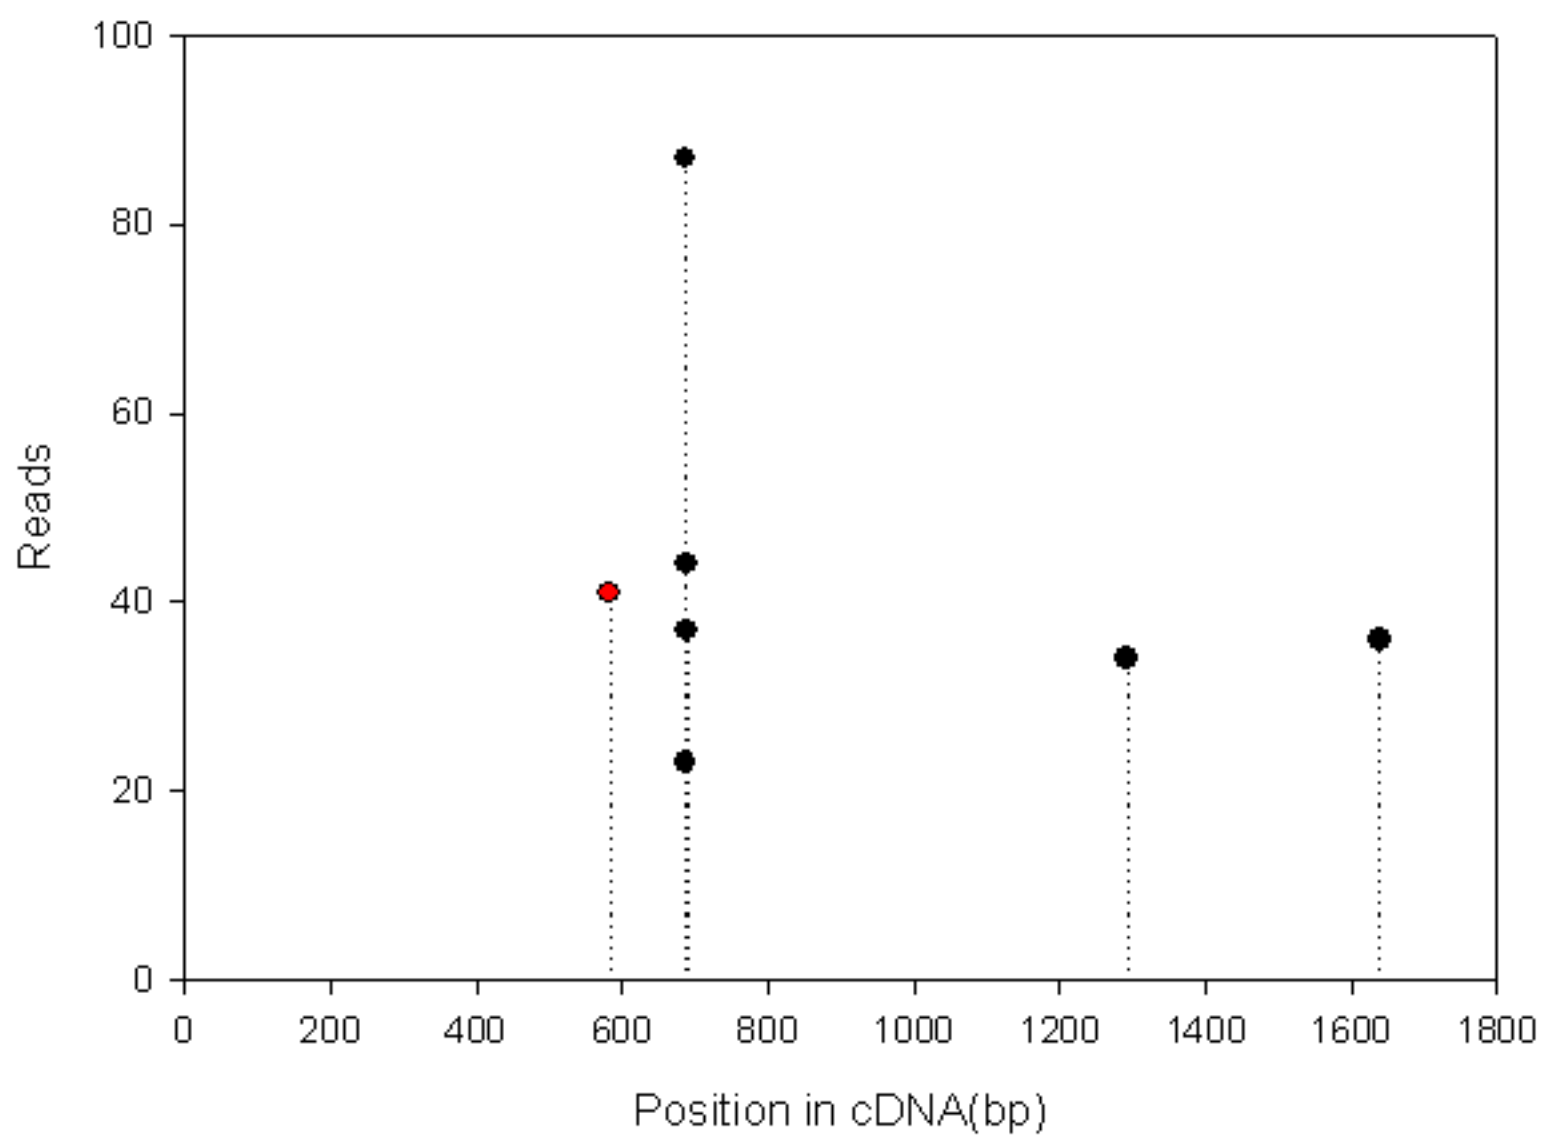

```

5' ACCGUUCAAGAAAGCCUGUGGAAUCA 3'
   :::::::::::::: ::::::::::::::
3' ---CAAGUUCUUUC-GACACCUU--- 5'
  
```

```

Orange1.1t03122.1
Csi-miR396b.1
  
```

Csi-miR396b.2, target=Cs1g21890.1 gene=Cs1g21890  
 Category:3  
 Score=4.5  
 Cleavage Site=1329

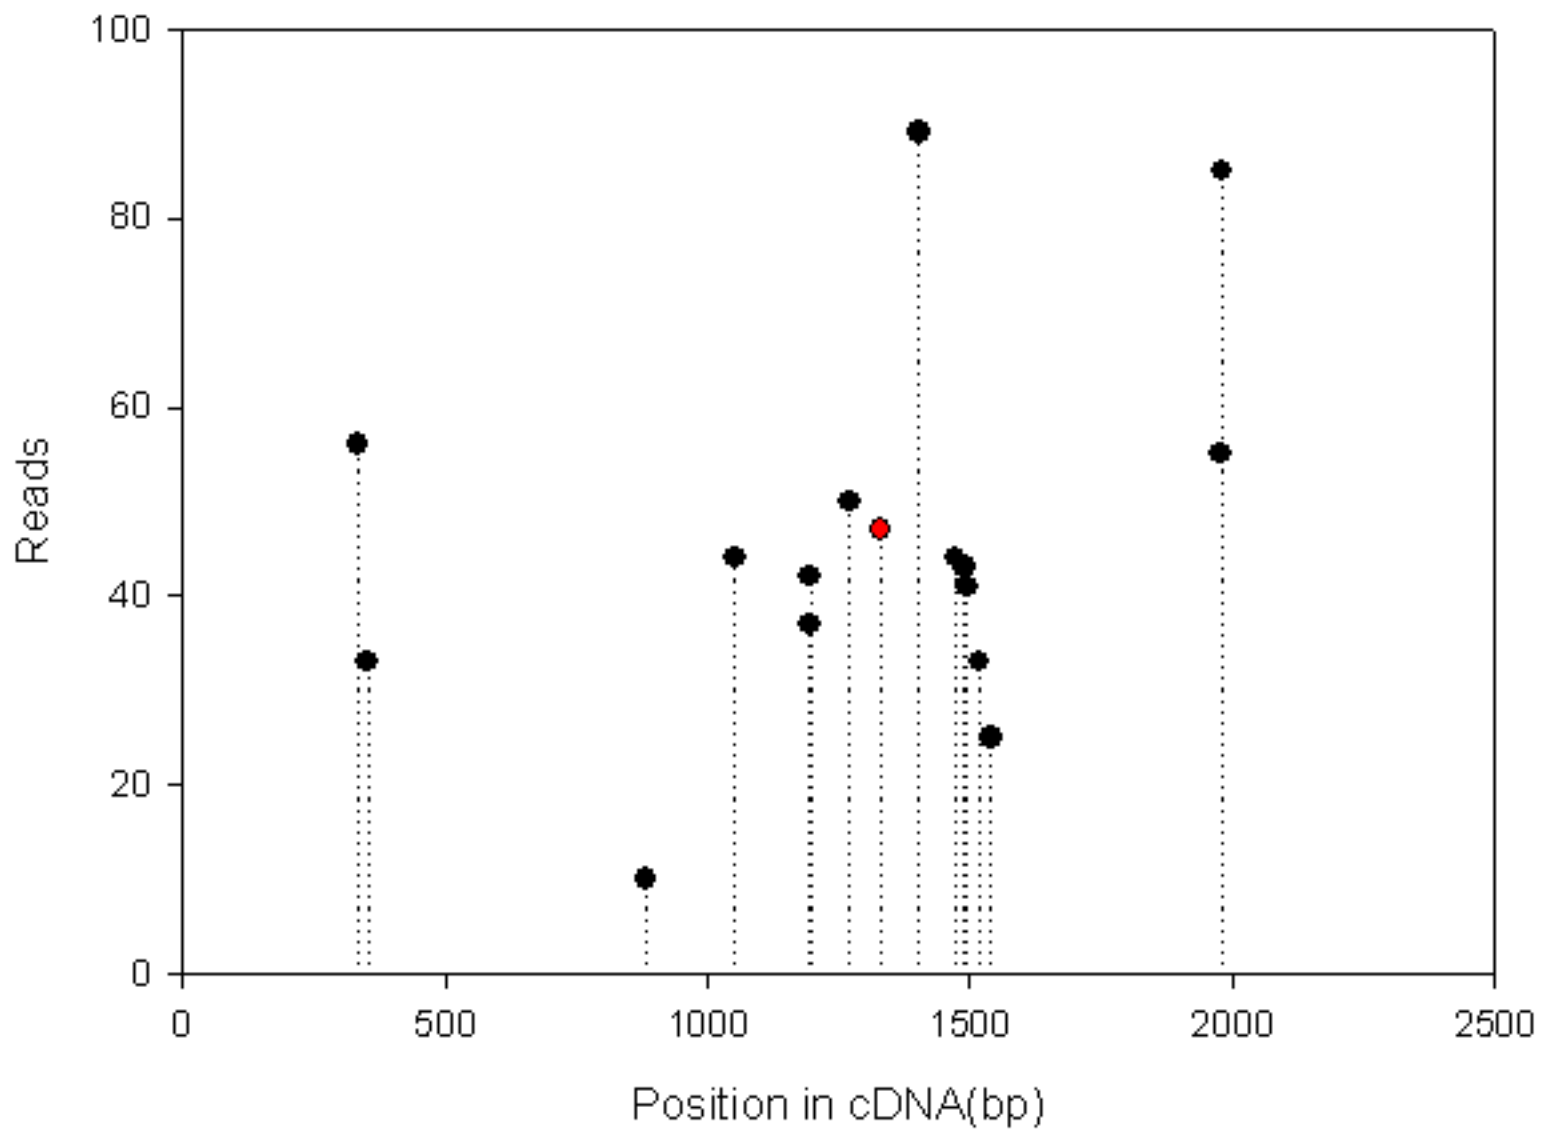

```

5' UAGGUUUCGAGGAAAUCUGUGGGAUU 3'      Cs1g21890.1
   ::: :.:::: ::::::
3' -----AAG-UUCUUUCGACACCUU-- 5'      Csi-miR396b.2
  
```

Csi-miR396b.2, target=Cs2g08090.1 gene=Cs2g08090  
 Category:3  
 Score=5  
 Cleavage Site=349

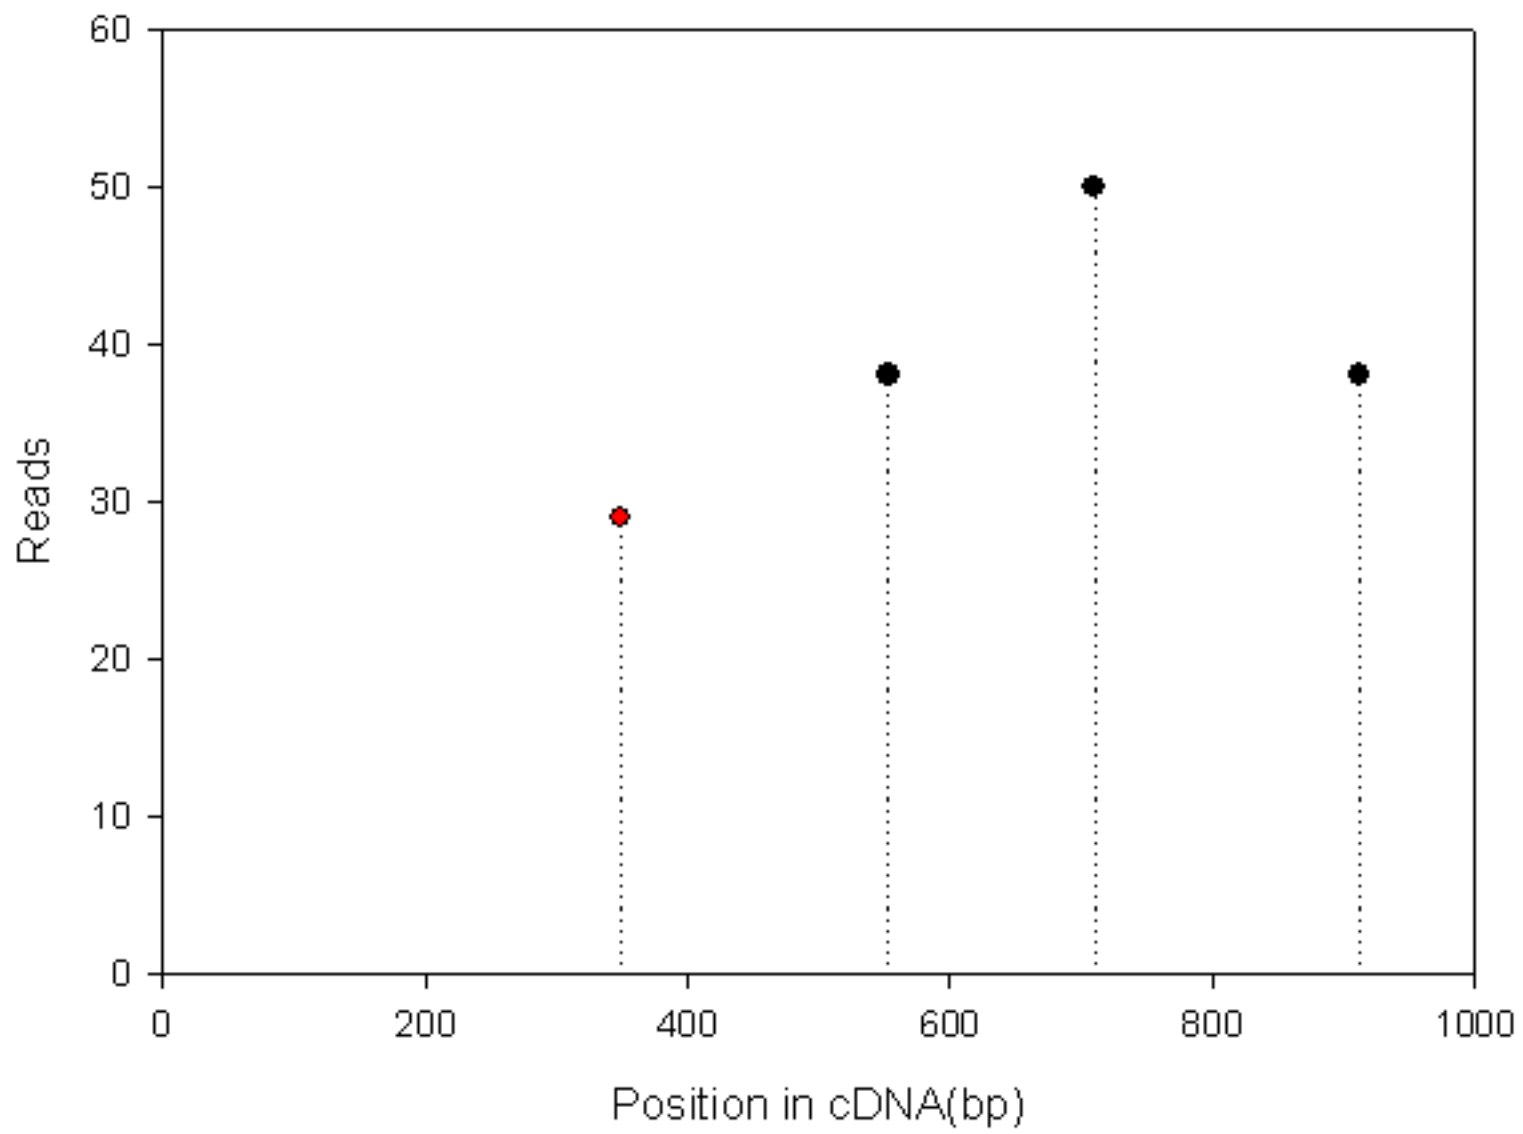

```

5' GGACUGUUCUA-AAAGUUGUGGACAAC 3'      Cs2g08090.1
      : : : : : : : : : :
3' -----AAGUUCUUUCGACACCUU---- 5'      Csi-miR396b.2
  
```

Csi-miR396b.2, target=Cs3g07260.1 gene=Cs3g07260  
 Category:3  
 Score=3.5  
 Cleavage Site=2420

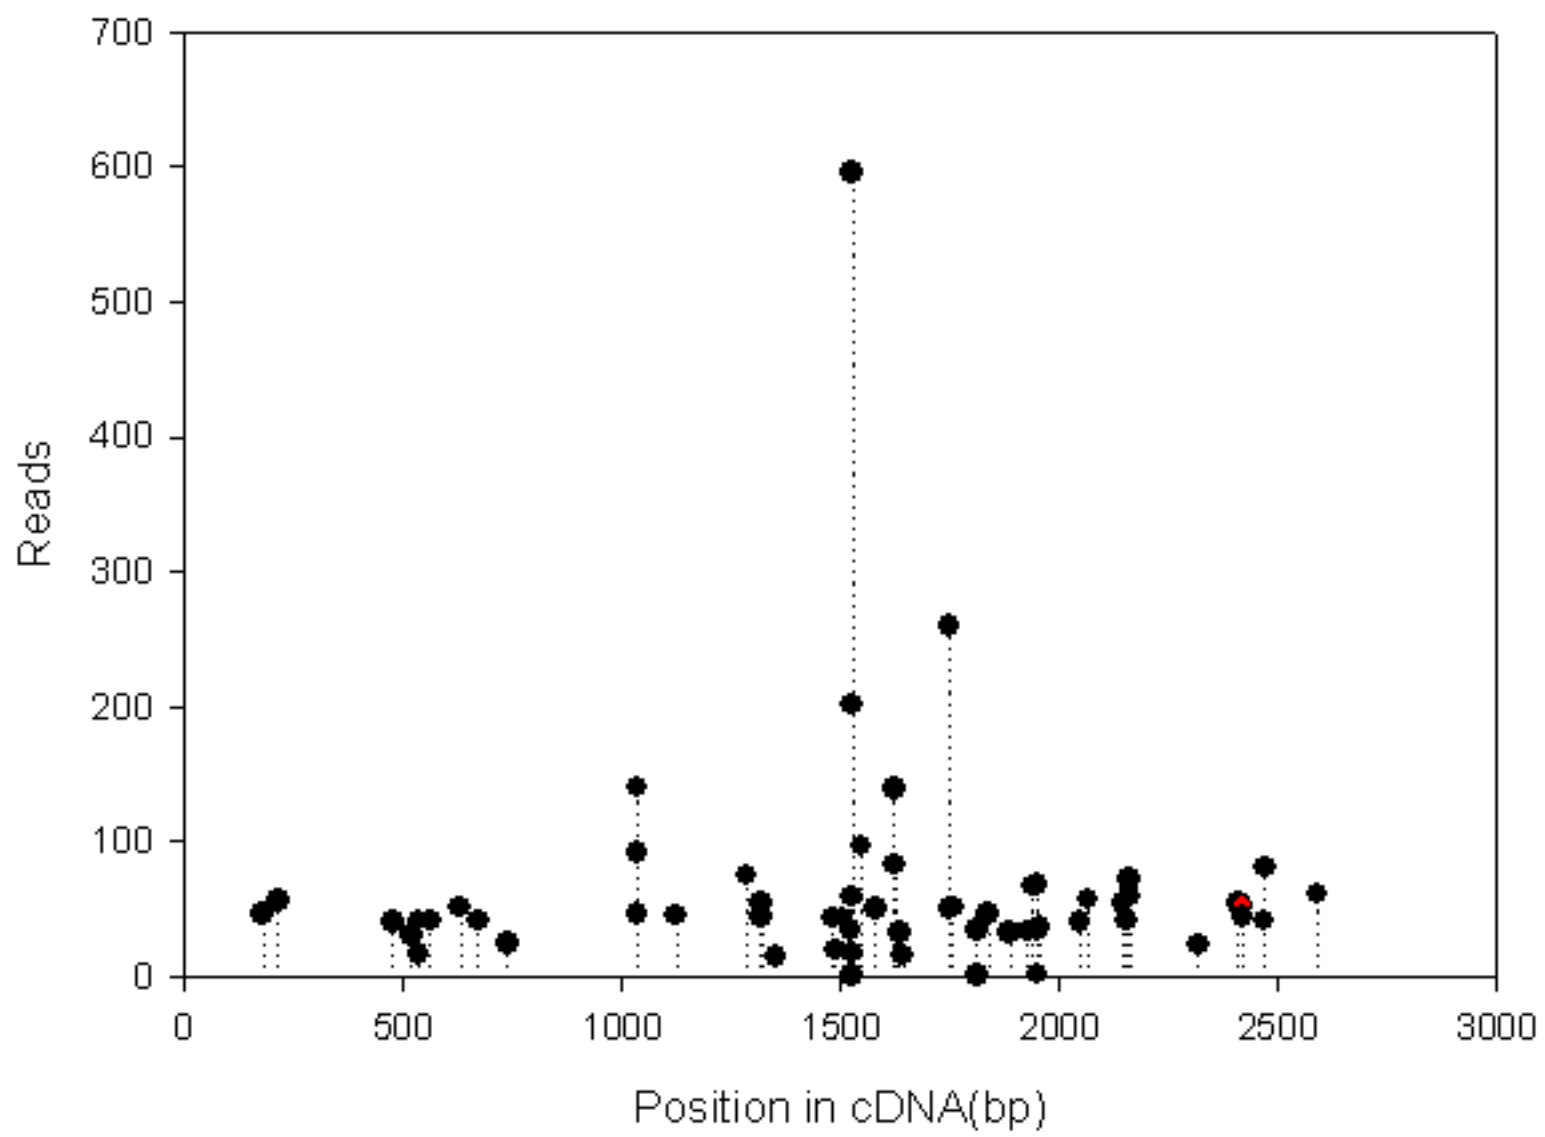

|    |    |                                 |    |               |
|----|----|---------------------------------|----|---------------|
| 5' | AU | CCAGGAAAGUUGUGGGAUAAUA          | 3' | Cs3g07260.1   |
|    | :  | : : : : : : : : : : : : : : : : |    |               |
| 3' | -- | AAGUUCUUUCGACACCUU-----         | 5' | Csi-miR396b.2 |

Csi-miR396b.2, target=Cs3g23180.1 gene=Cs3g23180  
 Category: 3  
 Score=3  
 Cleavage Site=625



|    |                            |    |               |
|----|----------------------------|----|---------------|
| 5' | AAAGAUCAAGGAAGCUGUGGGAGUUG | 3' | Cs3g23180.1   |
|    | .....                      |    |               |
| 3' | ----AAGUUCUUUCGACACCUU---- | 5' | Csi-miR396b.2 |

Csi-miR396b.2, target=Cs4g07730.1 gene=Cs4g07730  
 Category:1  
 Score=4.5  
 Cleavage Site=1132

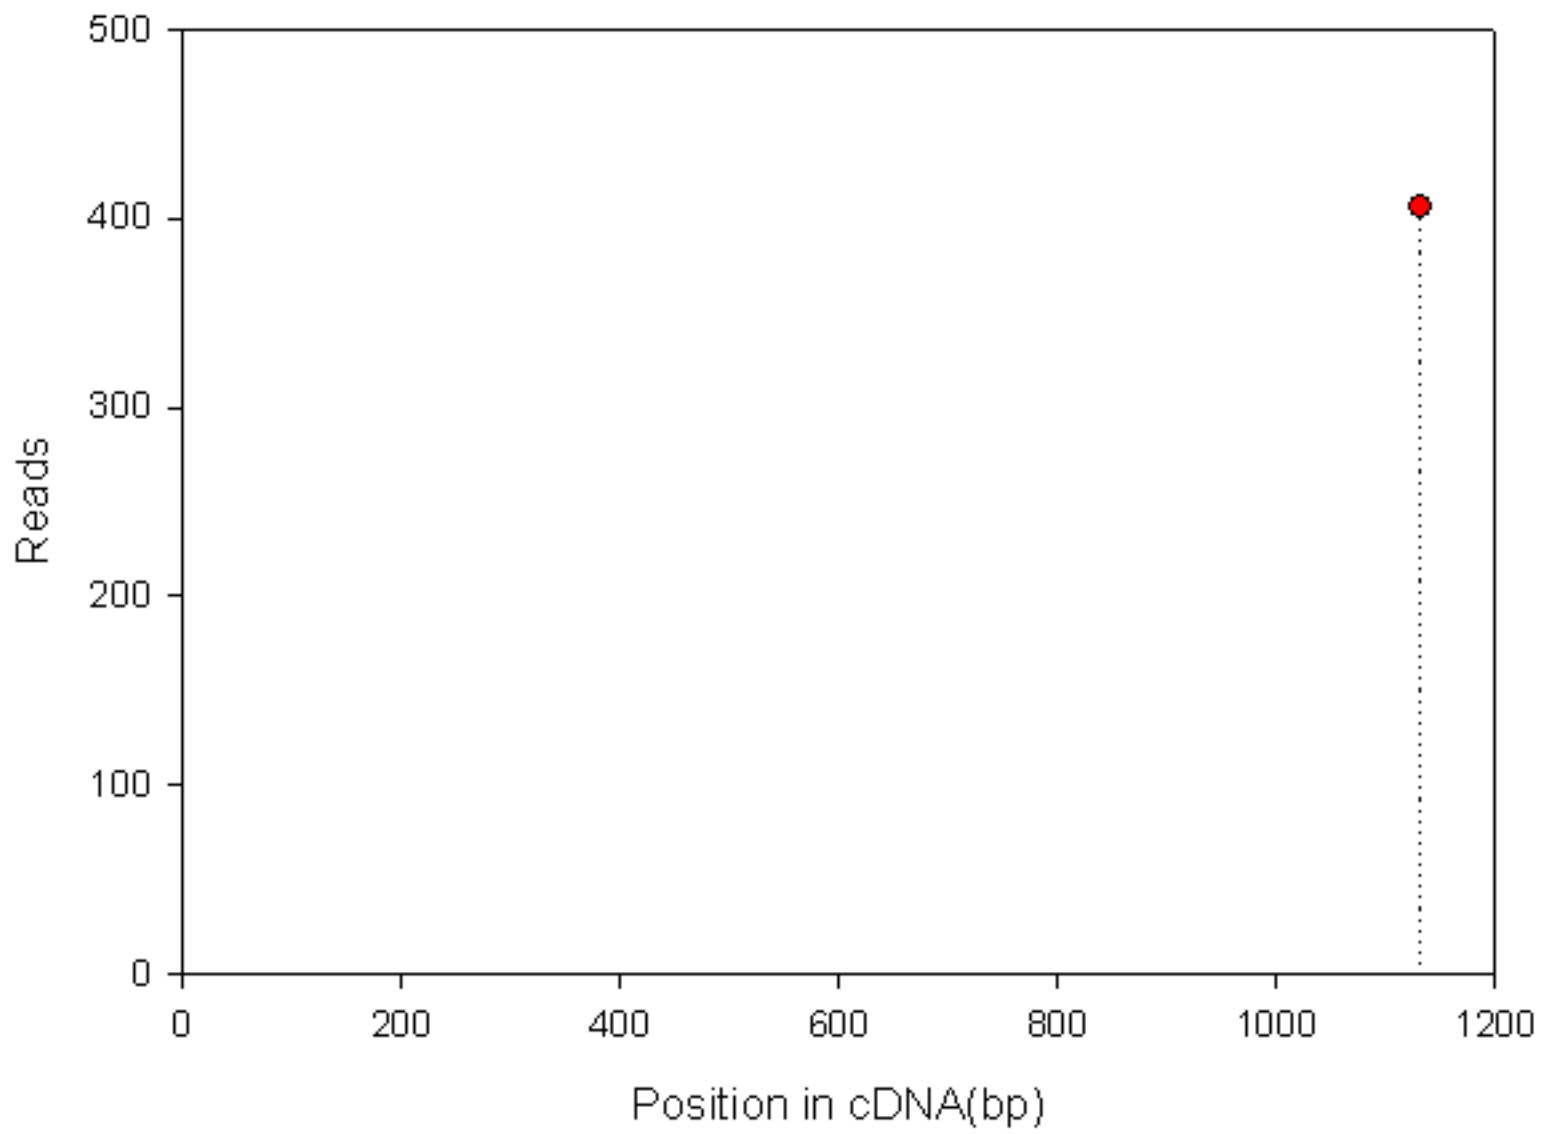

5' CGGAGGAAAGUUGUGGAAAAGUGUAA 3'

Cs4g07730.1

:.:.:.:.:.:.:.:.:.:.:.:.:.:.:.:

3' AAGUUCUUUCGACACCUU----- 5'

Csi-miR396b.2

Csi-miR396b.2, target=Cs5g01380.1 gene=Cs5g01380  
 Category:1  
 Score=2  
 Cleavage Site=1181

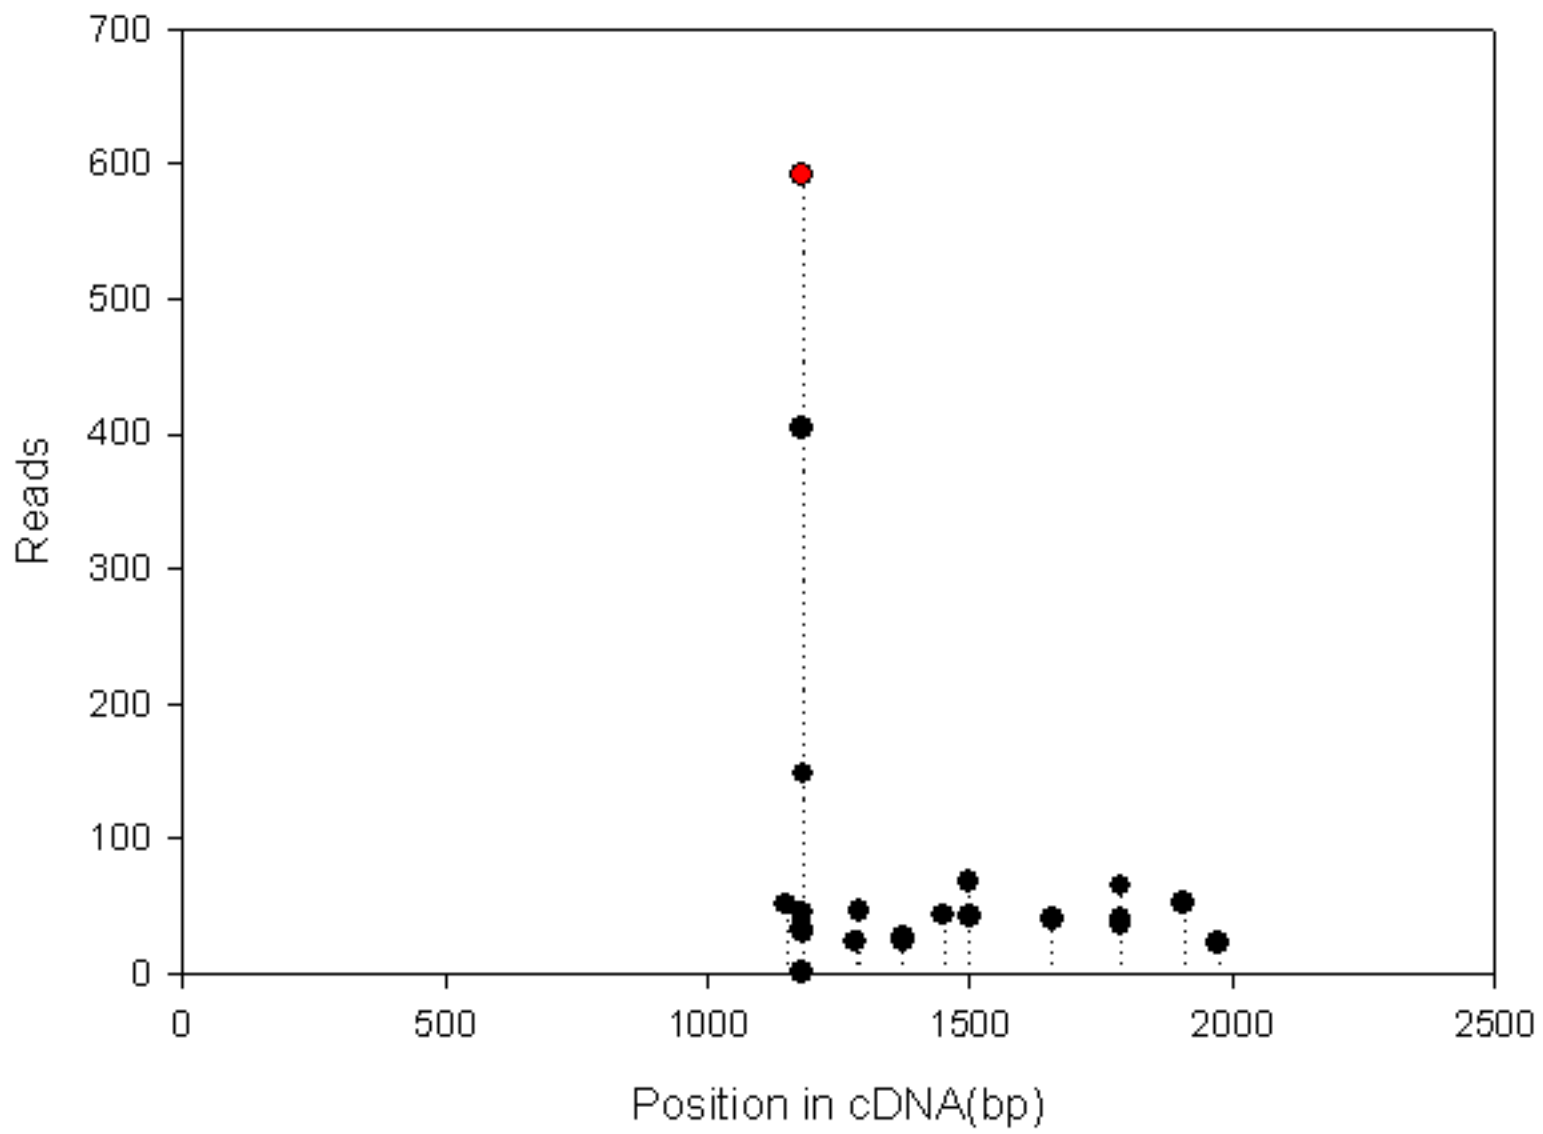

```

5' CCGUUCAAGAAAGCCUGUGGAAUUA 3'      Cs5g01380.1
   ::::::::::: :::::::::::
3' ----AAGUUCUUUC-GACACCUU---- 5'      Csi-miR396b.2
  
```

Csi-miR396b.2, target=Cs5g05620.1 gene=Cs5g0562  
 Category:3  
 Score=5  
 Cleavage Site=404

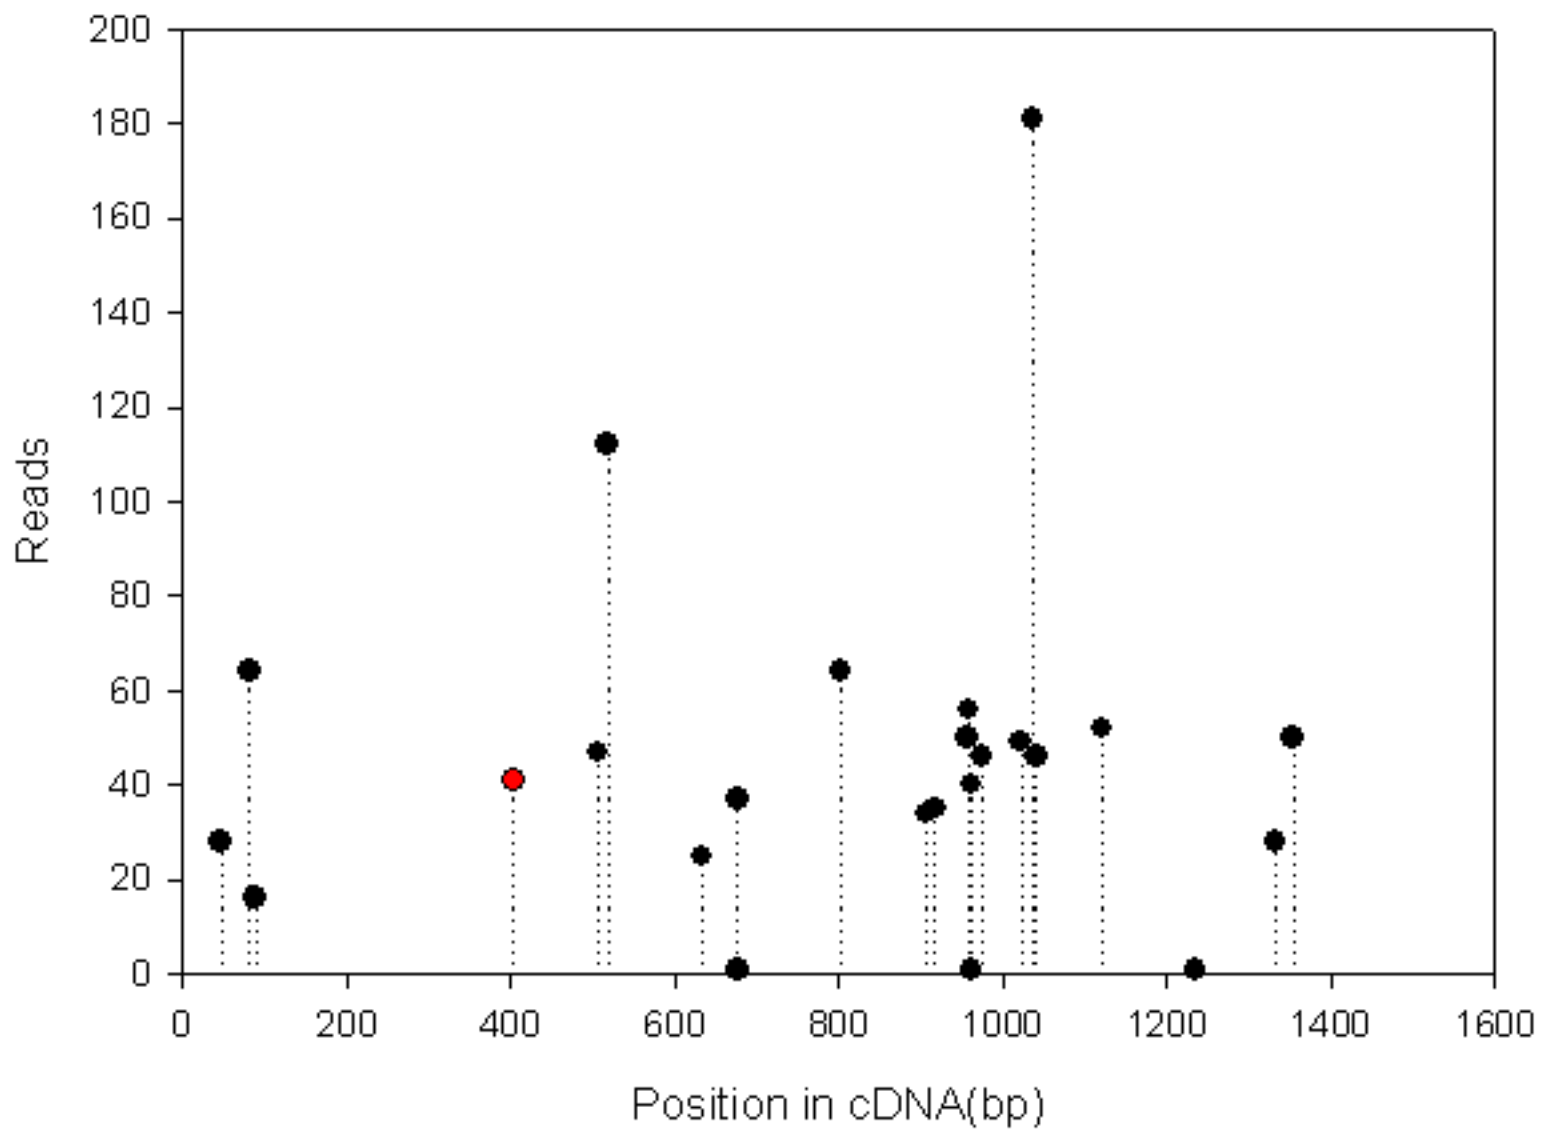

```

5' AAGGUGAGAAGAAGGUUGUGGAAAGU 3'          Cs5g05620.1
      : : : : : : : : : : : : : : :
3' -----AAGUUCUUUCGACACCU----- 5'      Csi-miR396b.2
  
```



Csi-miR396b.2, target=Cs5g19200.1 gene=Cs5g19200  
 Category:2  
 Score=2.5  
 Cleavage Site=201

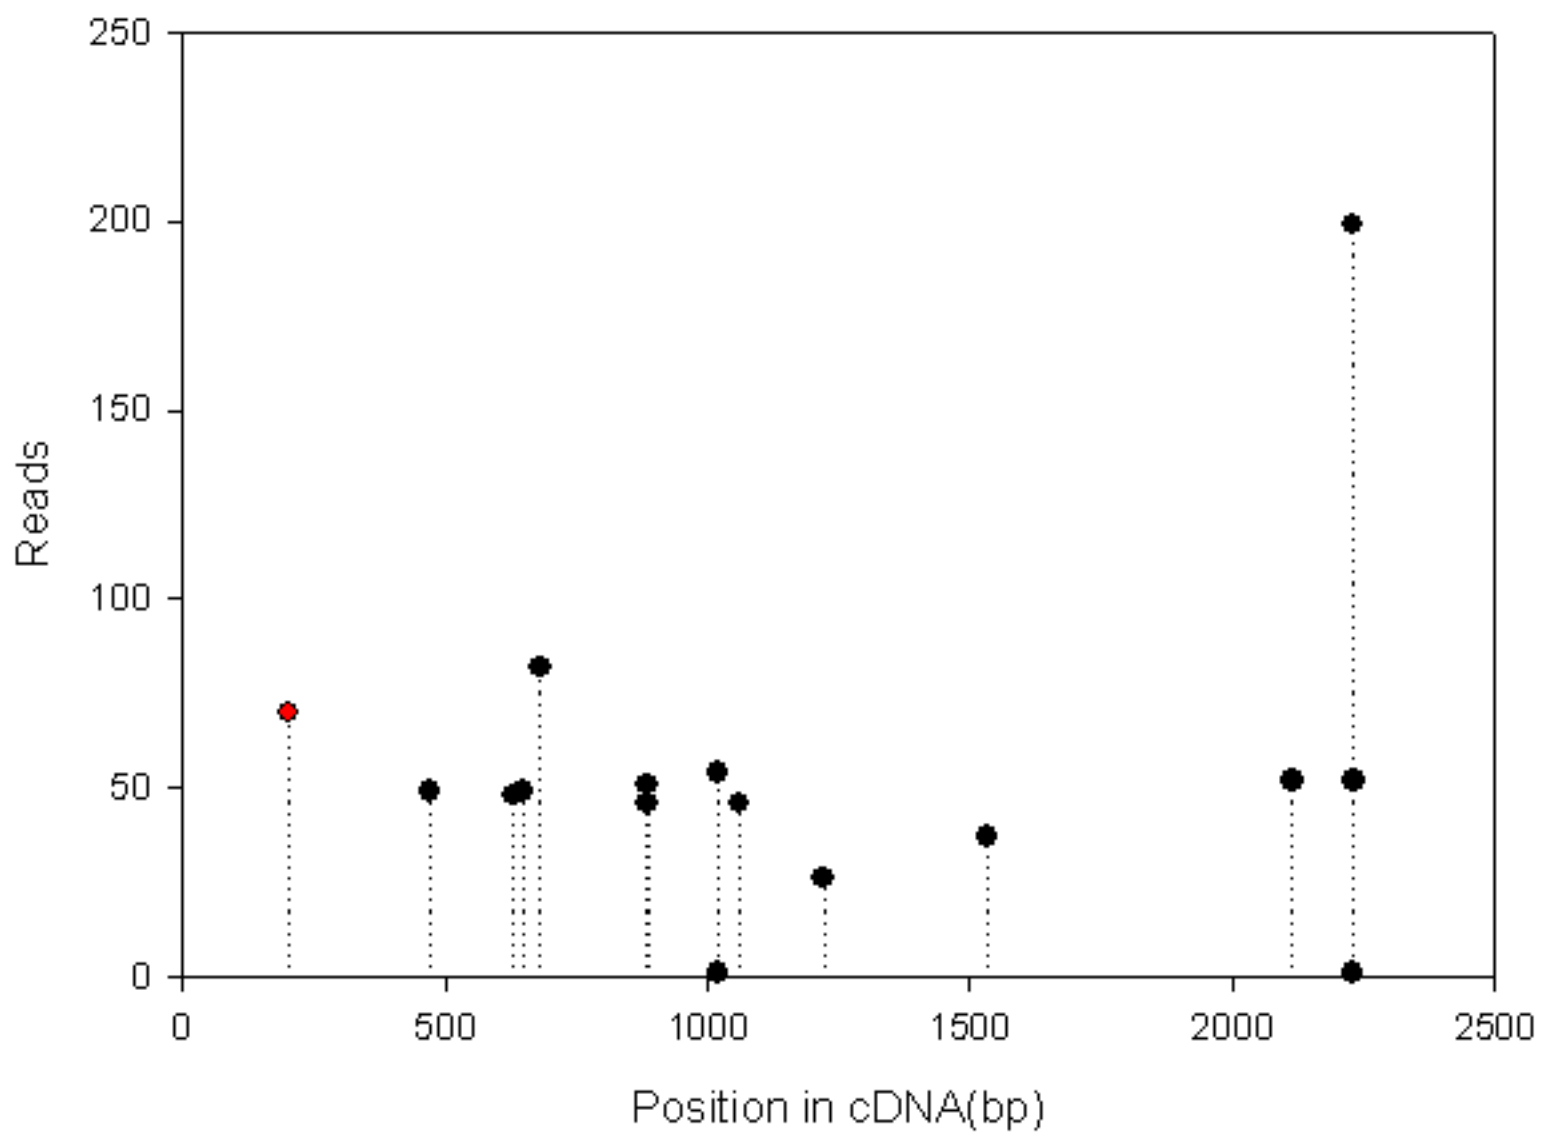

5' AAUGUUUAAGAAAGCAGUGGAAGCAA 3'  
 :::::::::::::: :::::  
 3' ----AAGUUCUUUCGACACCUU---- 5'

Cs5g19200.1

Csi-miR396b.2

Csi-miR396b.2, target=Cs5g23130.1 gene=Cs5g23130  
 Category:3  
 Score=4.5  
 Cleavage Site=3311

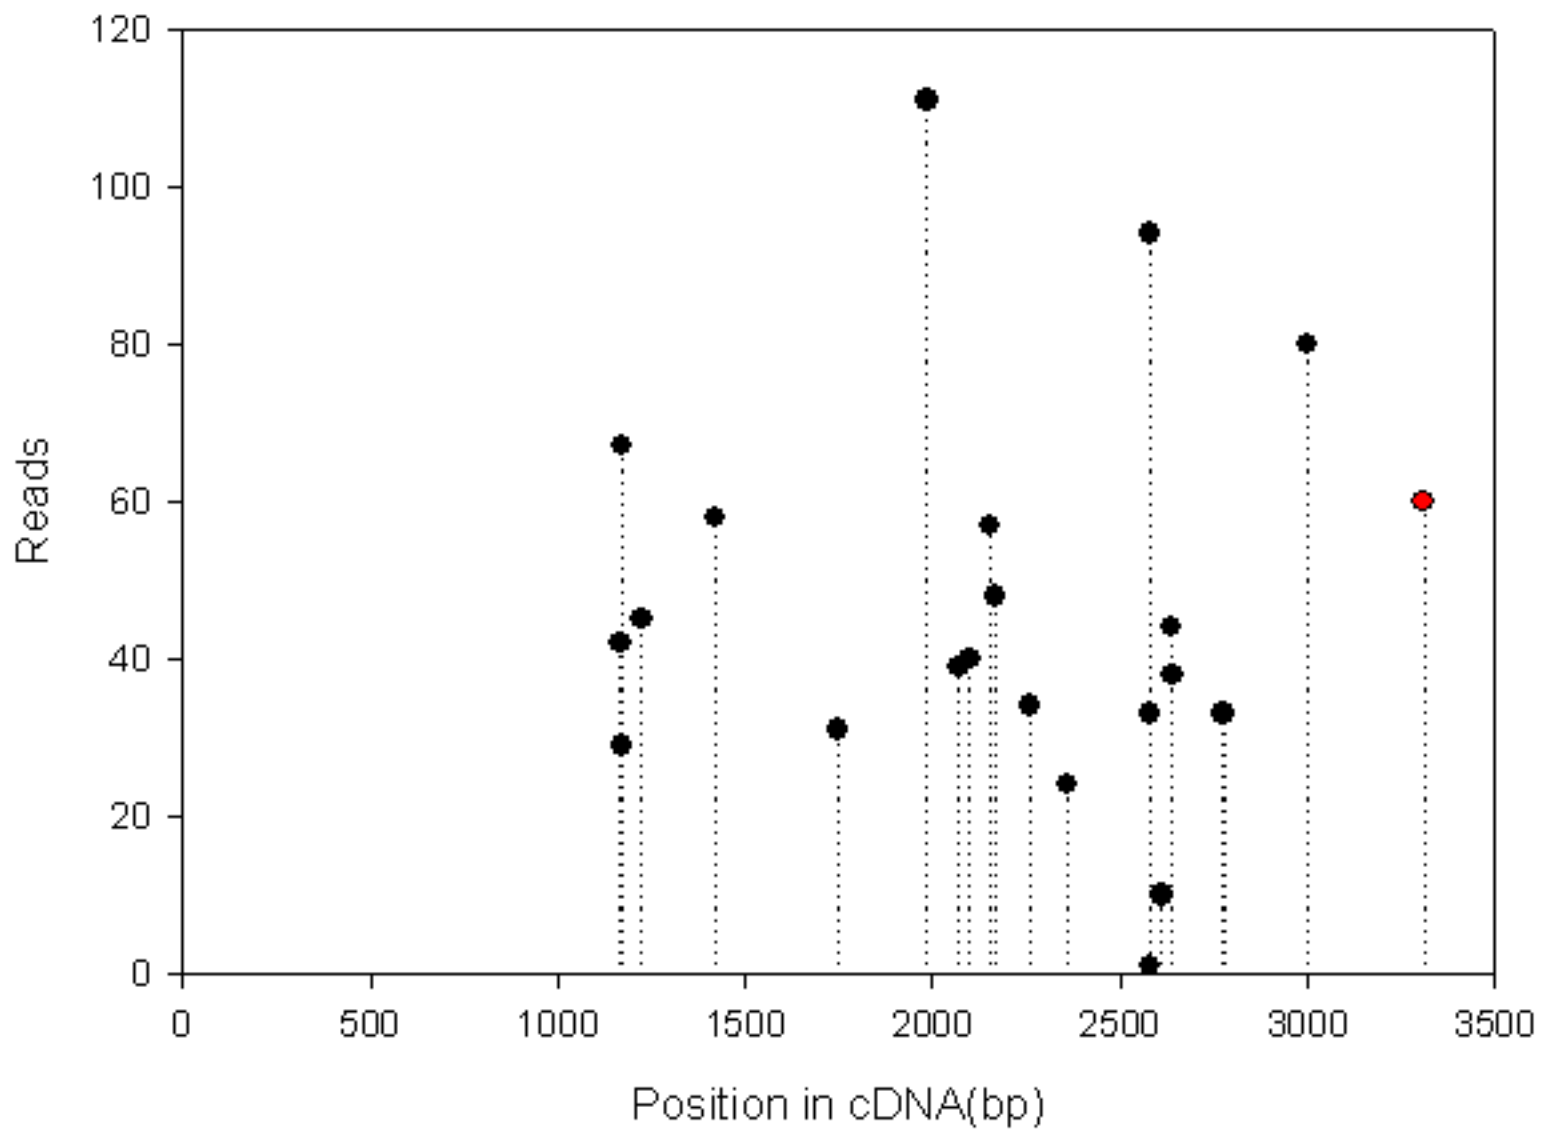

```

5' AACUUGUGGAGAAAGCUGUGGCAAU 3'      Cs5g23130.1
   : .....:
3' -----AAGUUCUUUCGACACCUU---- 5'    Csi-miR396b.2
  
```

Csi-miR396b.2, target=Cs5g24150.1 gene=Cs5g24150  
 Category:3  
 Score=5  
 Cleavage Site=3244

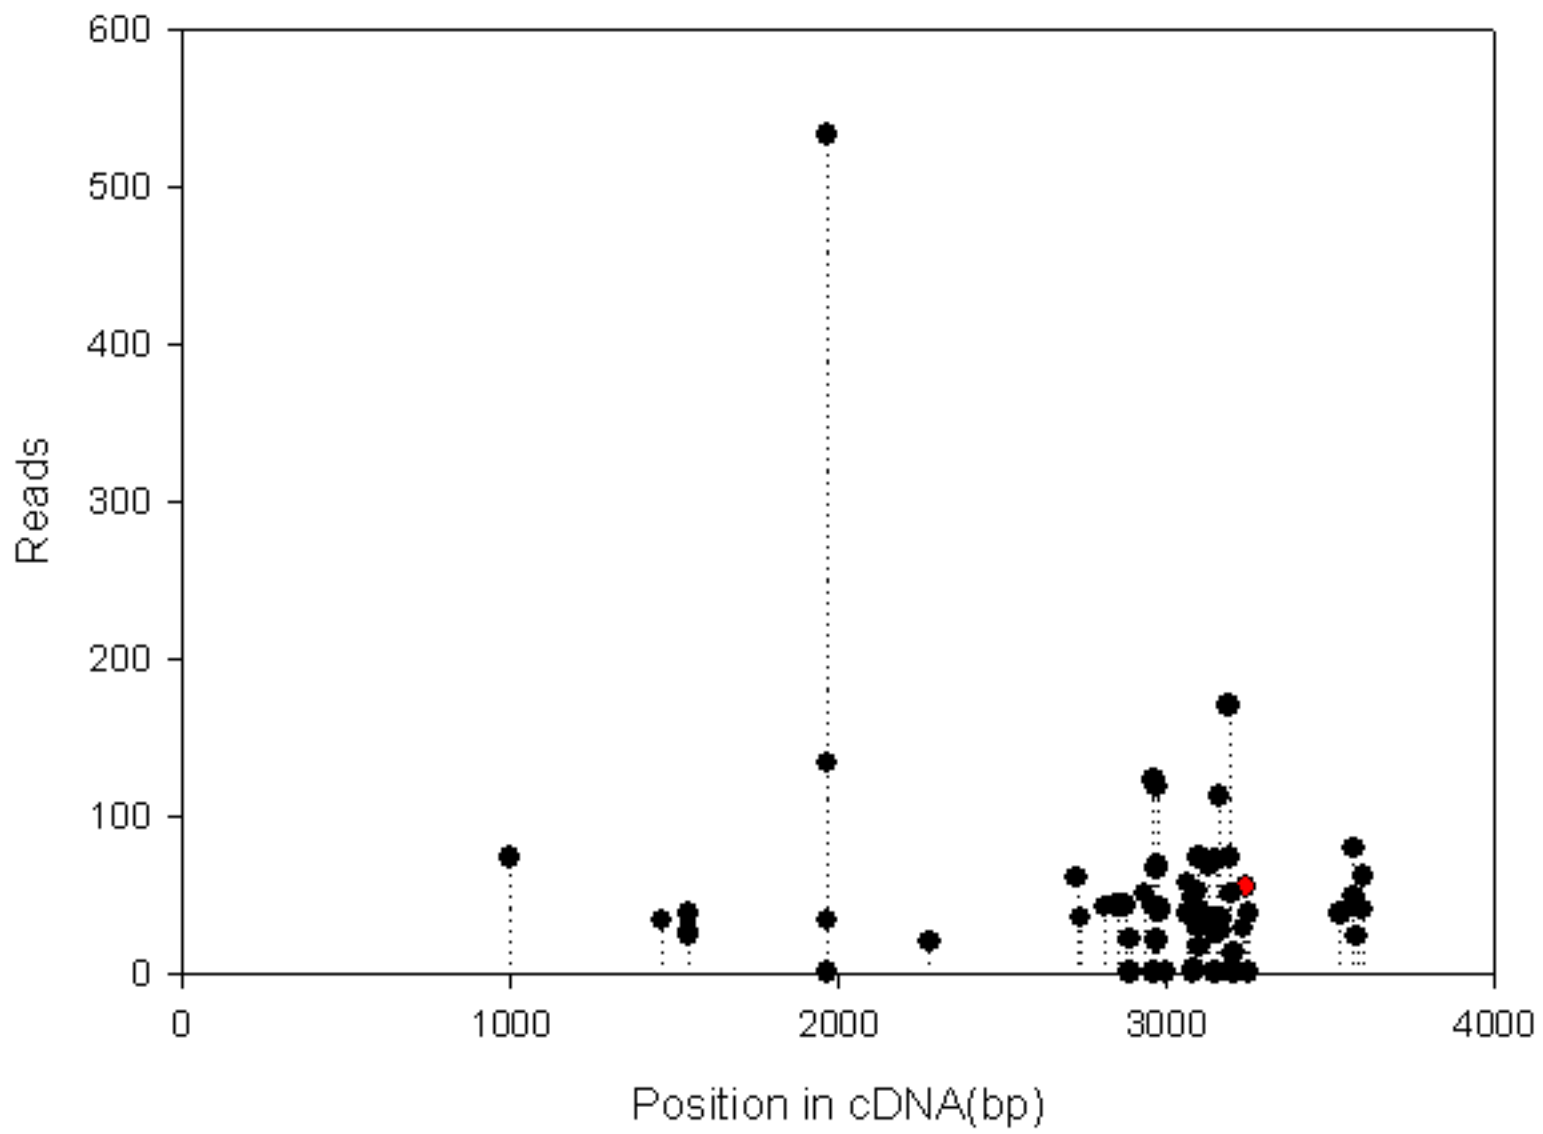

```

5' ACCAGAGCGAUCAA-AAAGCUGUAGAA 3'      Cs5g24150.1
      : : : : : : : : : : : : : :
3' -----AAGUUCUUUCGACACCUU 5'      Csi-miR396b.2
  
```

Csi-miR396b.2, target=Cs6g04030.1 gene=Cs6g04030  
 Category:3  
 Score=4  
 Cleavage Site=857

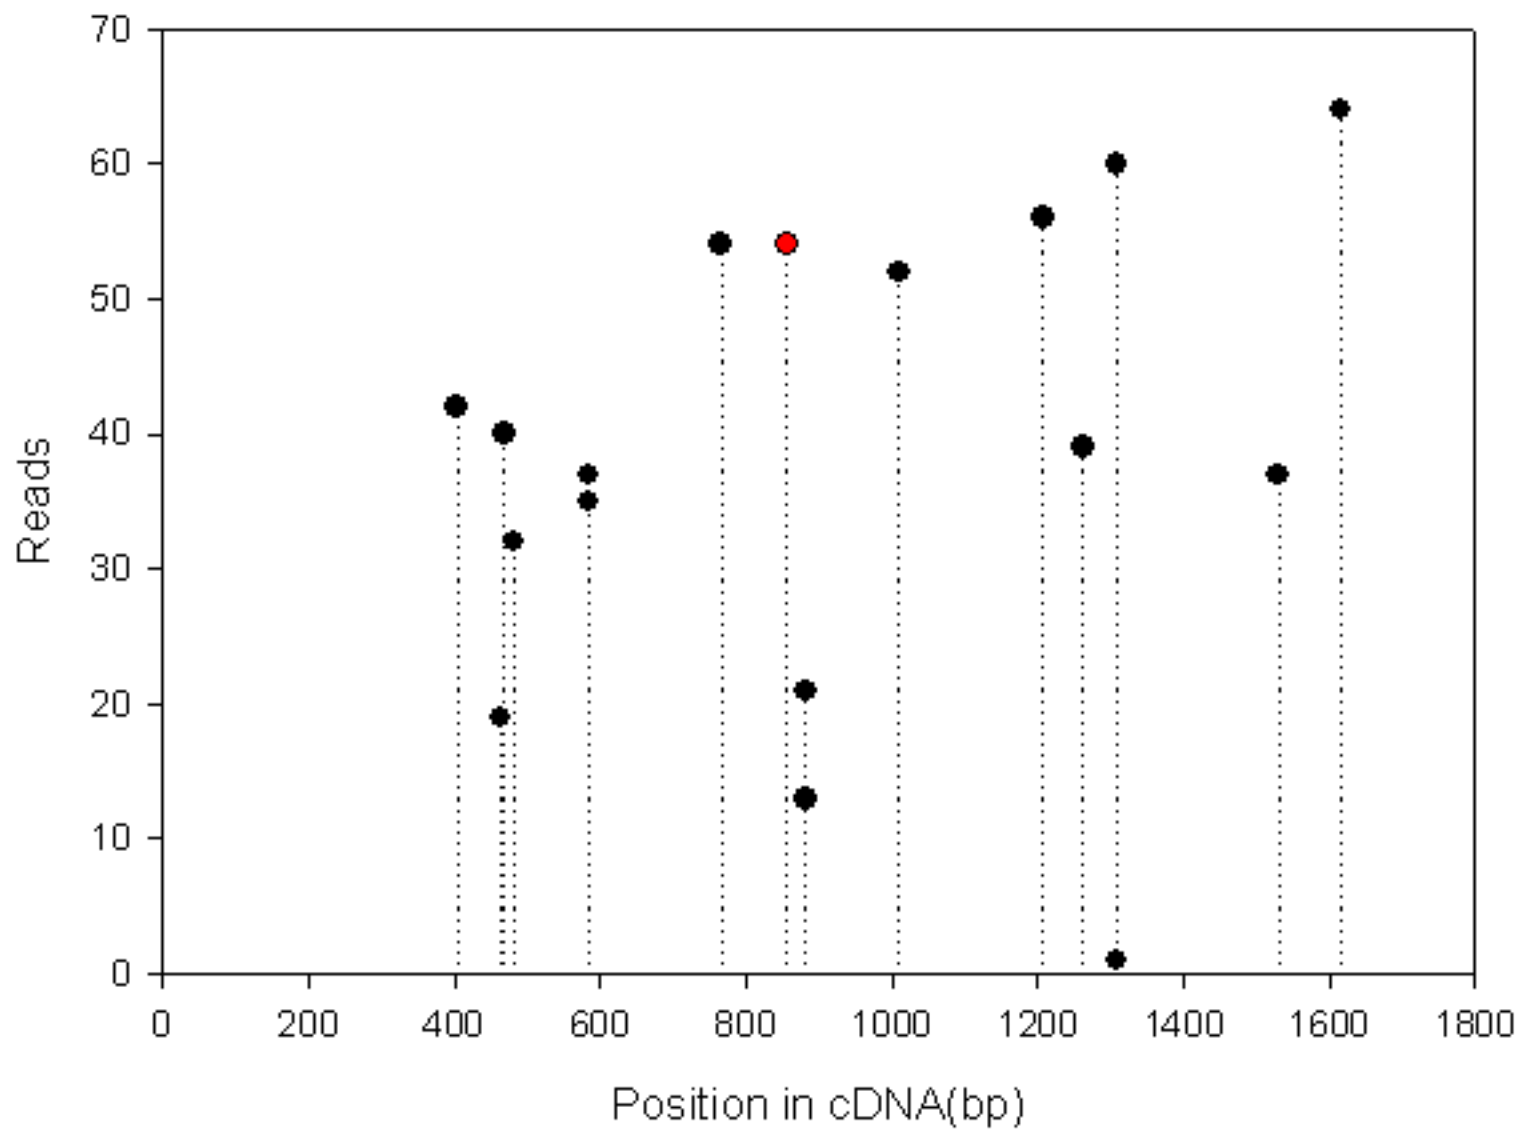

```

5'  GUAAAUACUUUUUAG-AAGCUGUGGAG  3'      Cs6g04030.1
      . . . . .
3'  -----AAGUUCUUUCGACACCUU  5'      Csi-miR396b.2
  
```

Csi-miR396b.2, target=Cs6g06540.1 gene=Cs6g06540  
 Category:3  
 Score=4  
 Cleavage Site=526

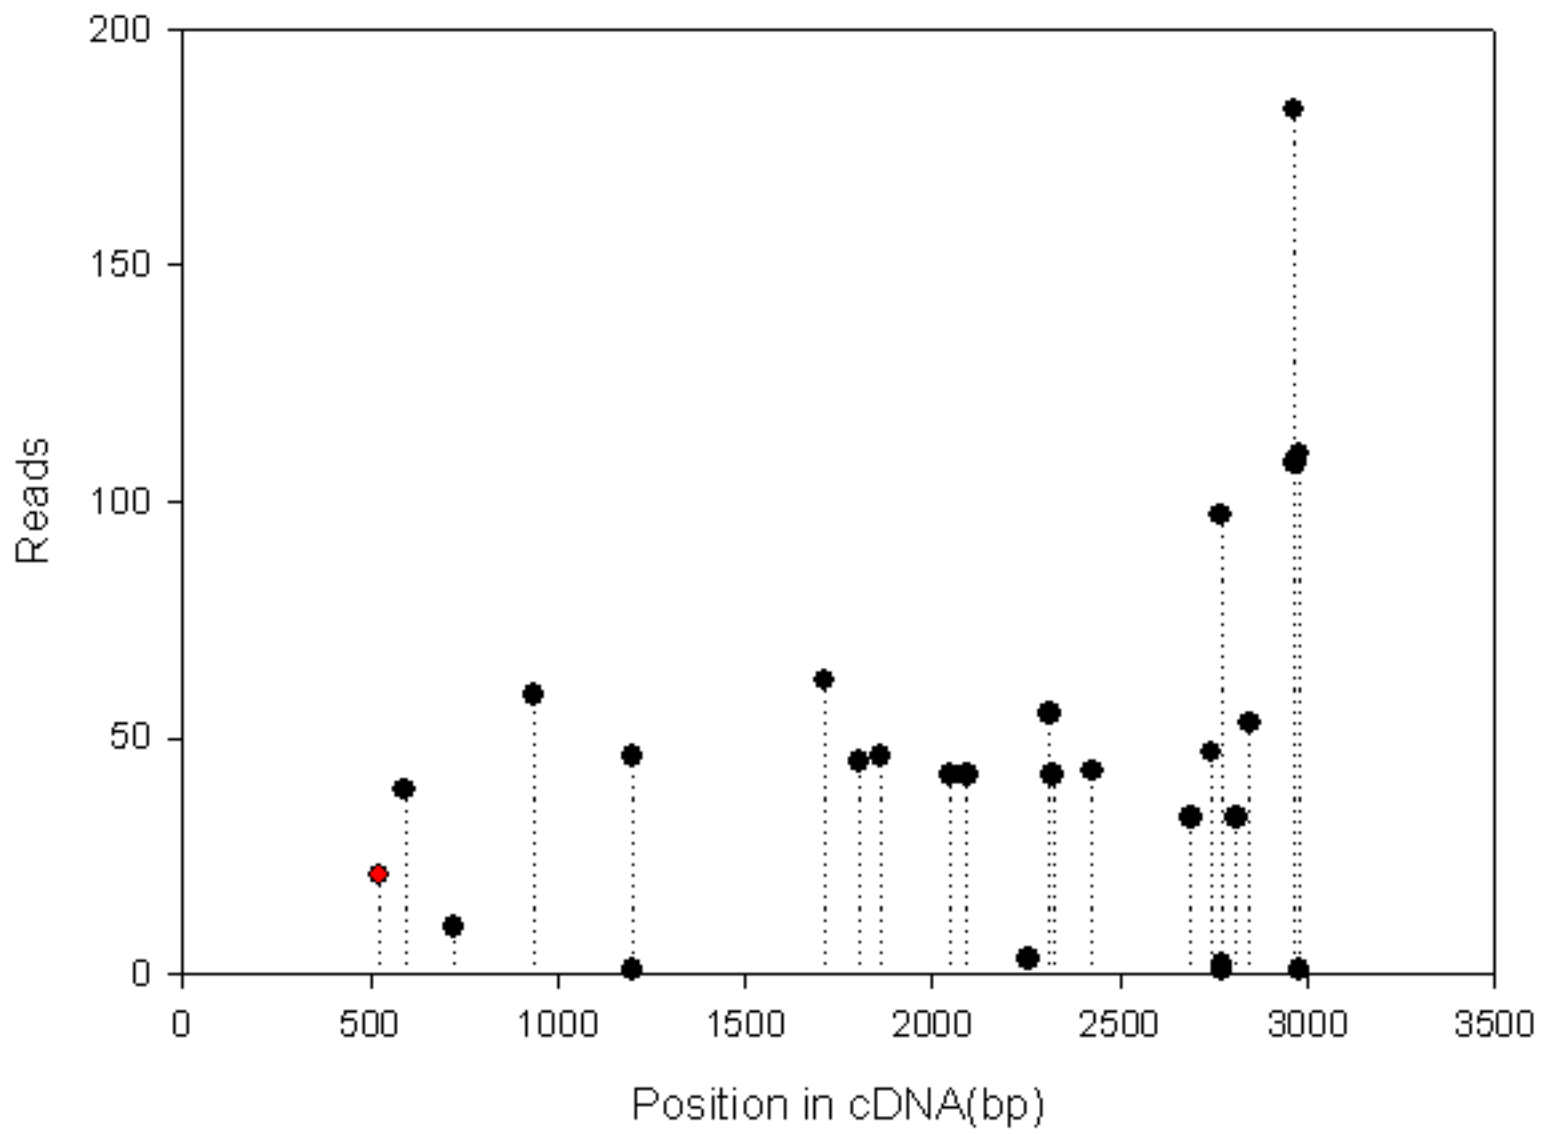

5' AACUCCUUC-AGAAAGCUGAGGAUAA 3'  
 ::: ::::::::::: :::  
 3' -----AAGUUCUUUCGACACCUU-- 5'

Cs6g06540.1

Csi-miR396b.2

Csi-miR396b.2, target=Cs6g20570.1 gene=Cs6g20570  
 Category:3  
 Score=5  
 Cleavage Site=231

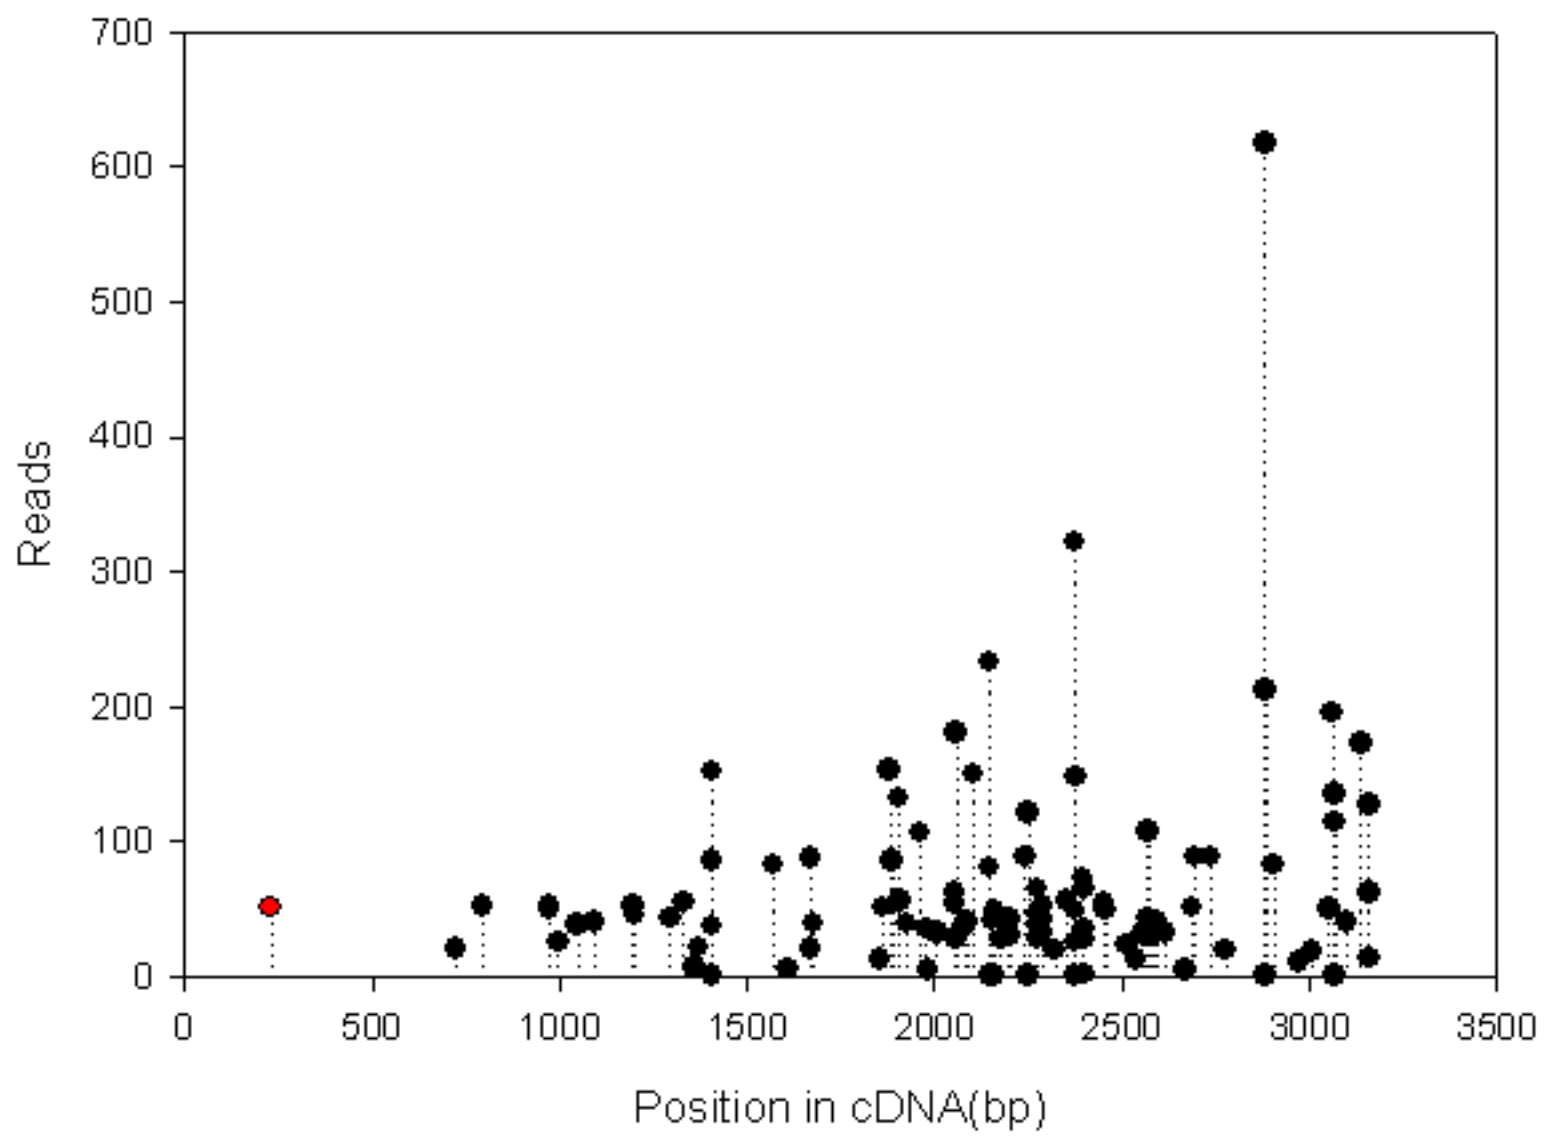

5' GCAGUGUUGAAGGAAGCUGUAGAUUU 3'  
 :: ::::: ::::: ::  
 3' -----AAGUUCUUUCGACACCUU-- 5'

Cs6g20570.1

Csi-miR396b.2

Csi-miR396b.2, target=Cs7g11670.1 gene=Cs7g11670  
 Category:3  
 Score=4.5  
 Cleavage Site=143

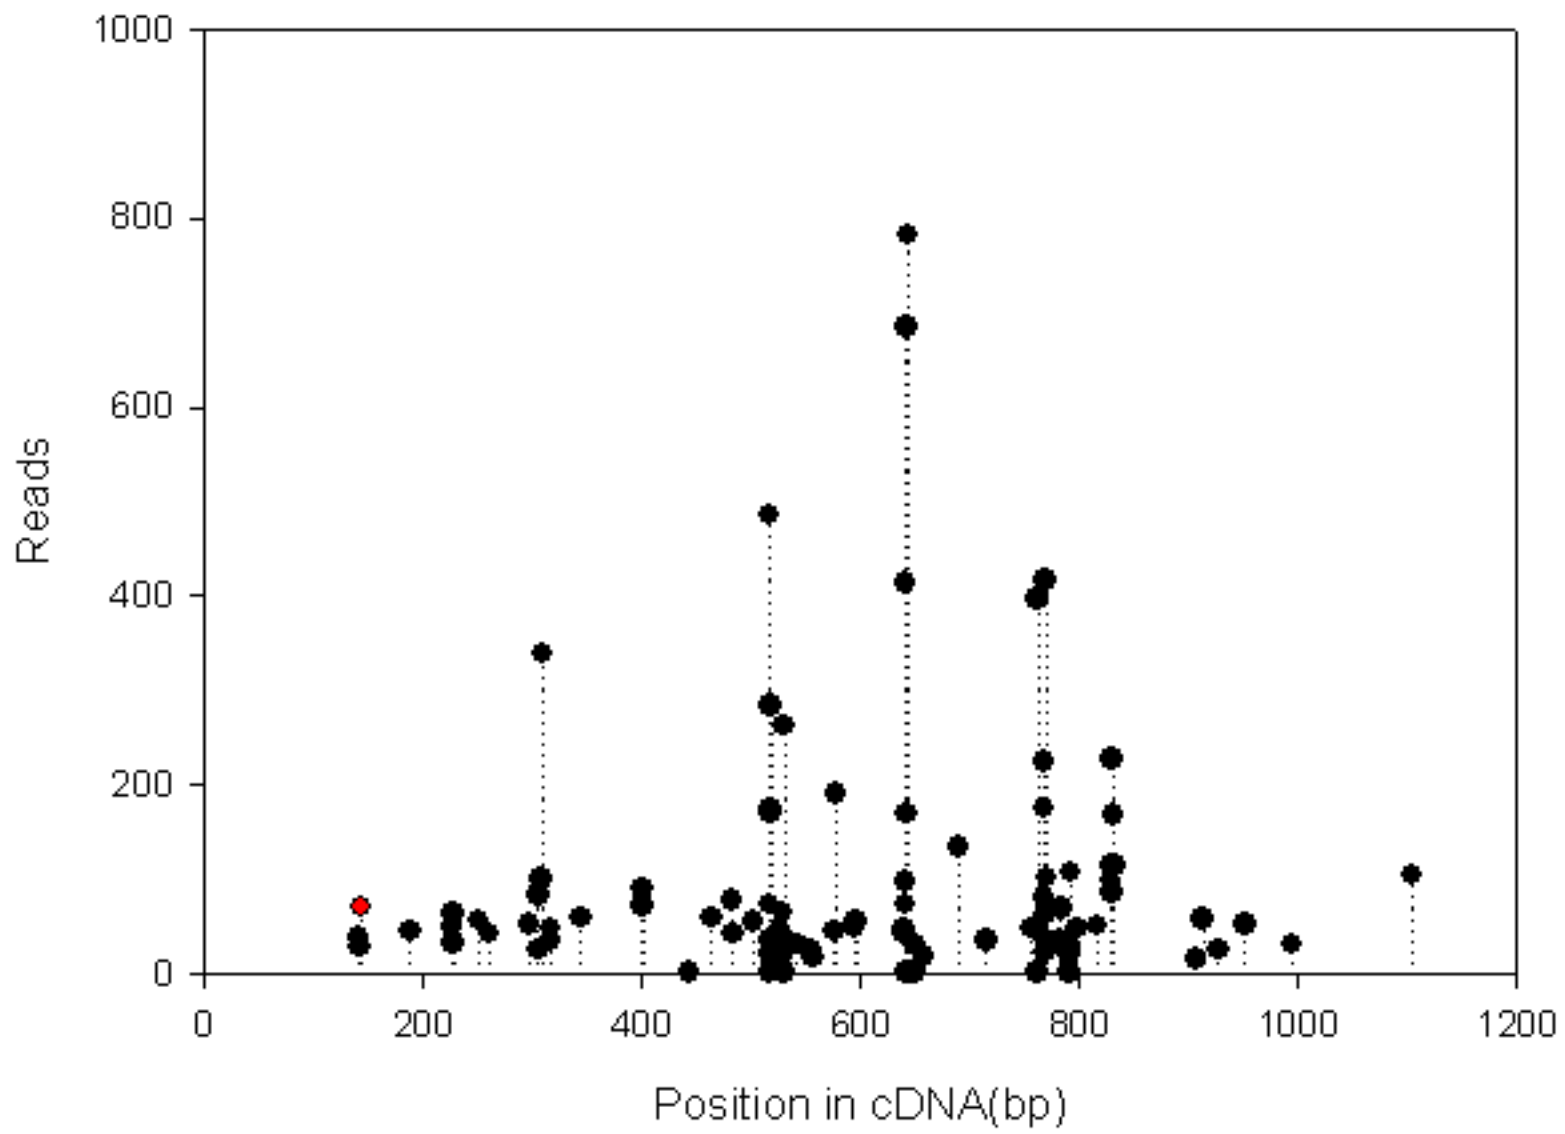

```

5' GGAUUCAUGAGAG-UGUGGAGGAGCUU 3'      Cs7g11670.1
   : : : : : : : : : : : : : : : :
3' ---AAGUUCUUUCGACACCUU----- 5'      Csi-miR396b.2
  
```

Csi-miR396b.2, target=Cs7g12930.1 gene=Cs7g12930  
 Category:1  
 Score=3.5  
 Cleavage Site=1079



```

5' UAGUAUUAAGAAAGCUGAGGAAAAAG 3'          Cs7g12930.1
   :.:.:.:.:.:.:.:.:.:.:.:.:.:.:
3' ----AAGUUCUUUCGACACCUU---- 5'          Csi-miR396b.2
  
```



Csi-miR396b.2, target=Cs7g15220.1 gene=Cs7g15220  
Category:1  
Score=2  
Cleavage Site=377



```
5' ACCGUUCAAGAAAGCCUGUGGAAUCA 3' Cs7g15220.1
      ::::::::::: :::::::::::
3' ----AAGUUCUUUC-GACACCUU---- 5' Csi-miR396b.2
```

Csi-miR396b.2, target=Cs7g18780.1 gene=Cs7g18780  
 Category:3  
 Score=5  
 Cleavage Site=1021

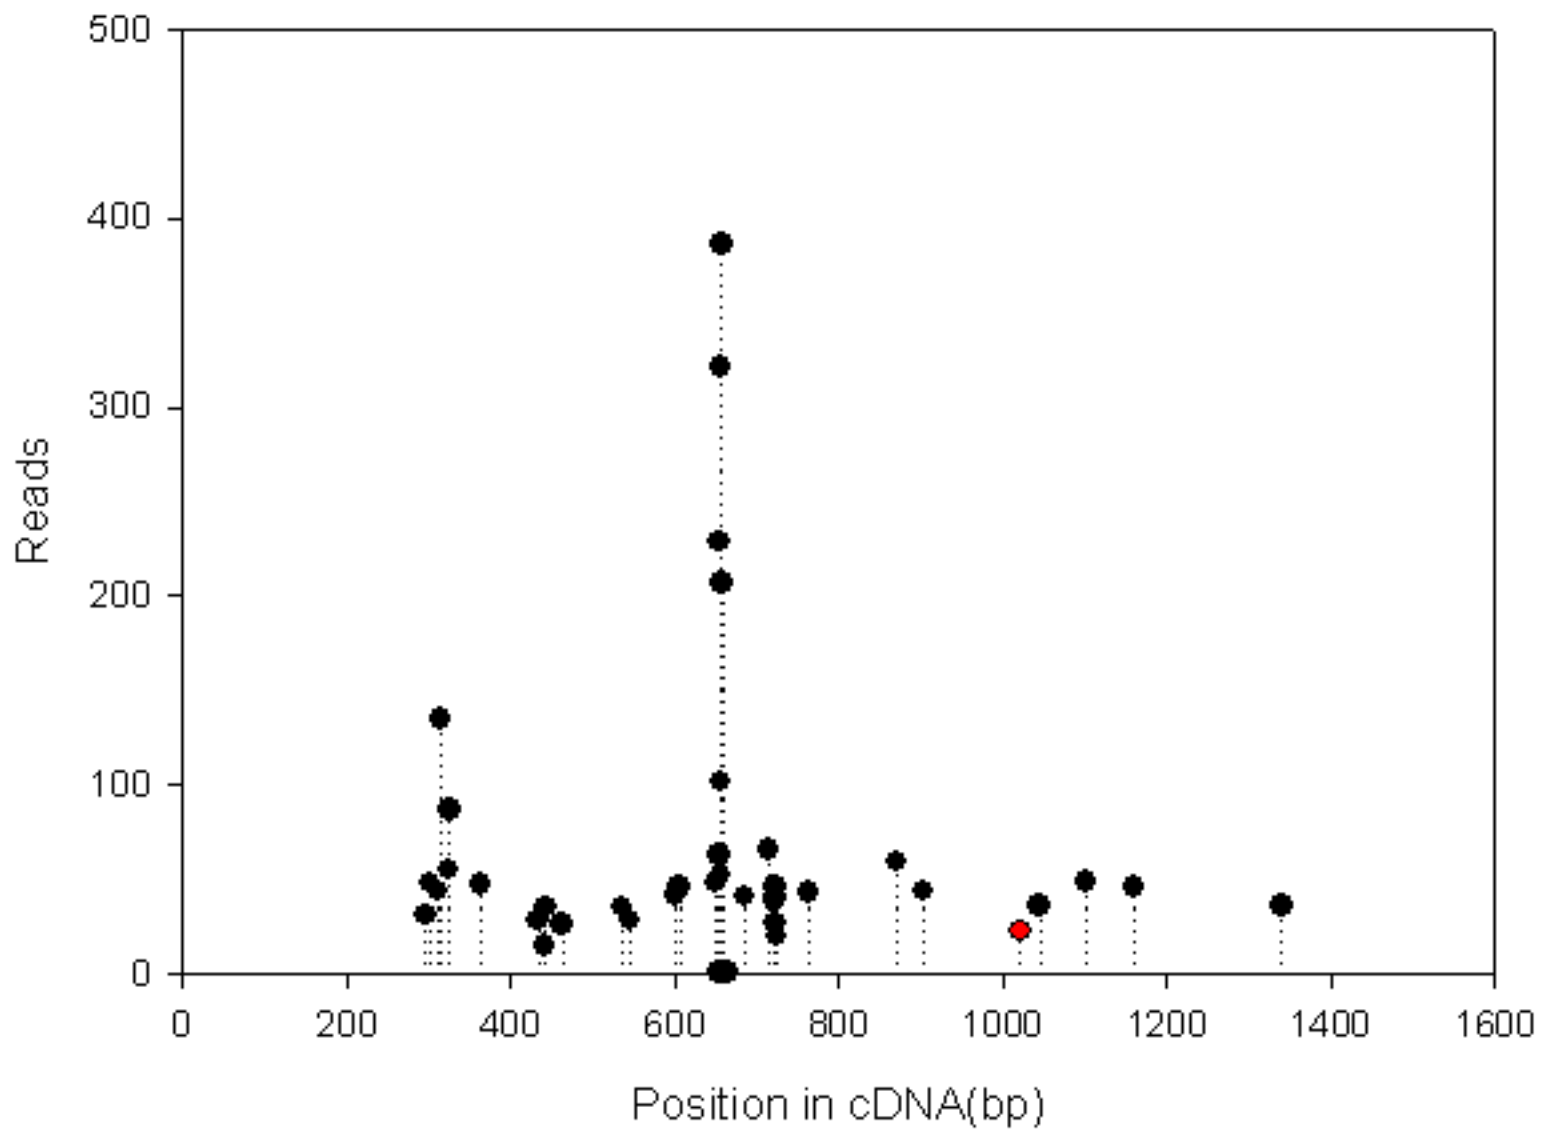

```

5' AGGGAACAAGAAAGUAUGUGGAAAGC 3'      Cs7g18780.1
   ::::::::::. :::::
3' ----AAGUUCUUUCG-ACACCU---- 5'      Csi-miR396b.2

```

Csi-miR396b.2, target=Cs7g23200.1 gene=Cs7g23200  
 Category:2  
 Score=5  
 Cleavage Site=260

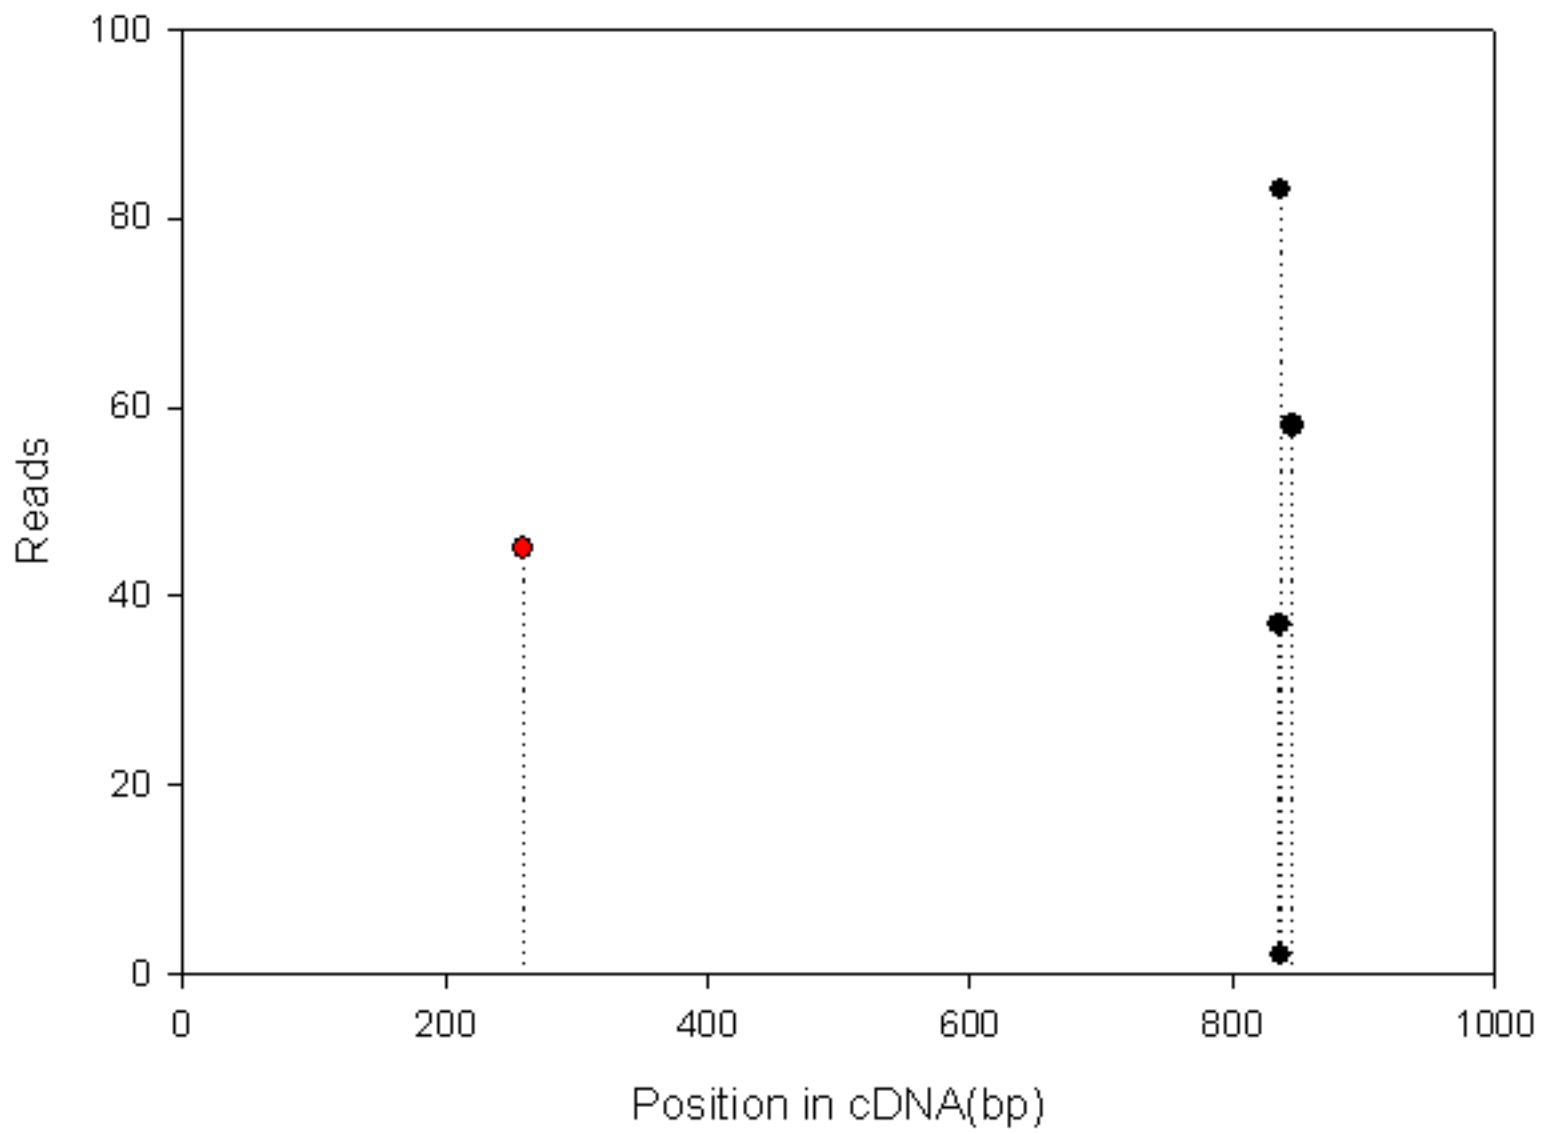

5' AAGAGUUCUGGAAGGCUGCGGAGGAC 3'  
 . . . . .  
 3' -----AAGUUCUUUCGACACCUU--- 5'

Cs7g23200.1

Csi-miR396b.2

Csi-miR396b.2, target=Cs8g04510.1 gene=Cs8g04510  
 Category:3  
 Score=4.5  
 Cleavage Site=1239

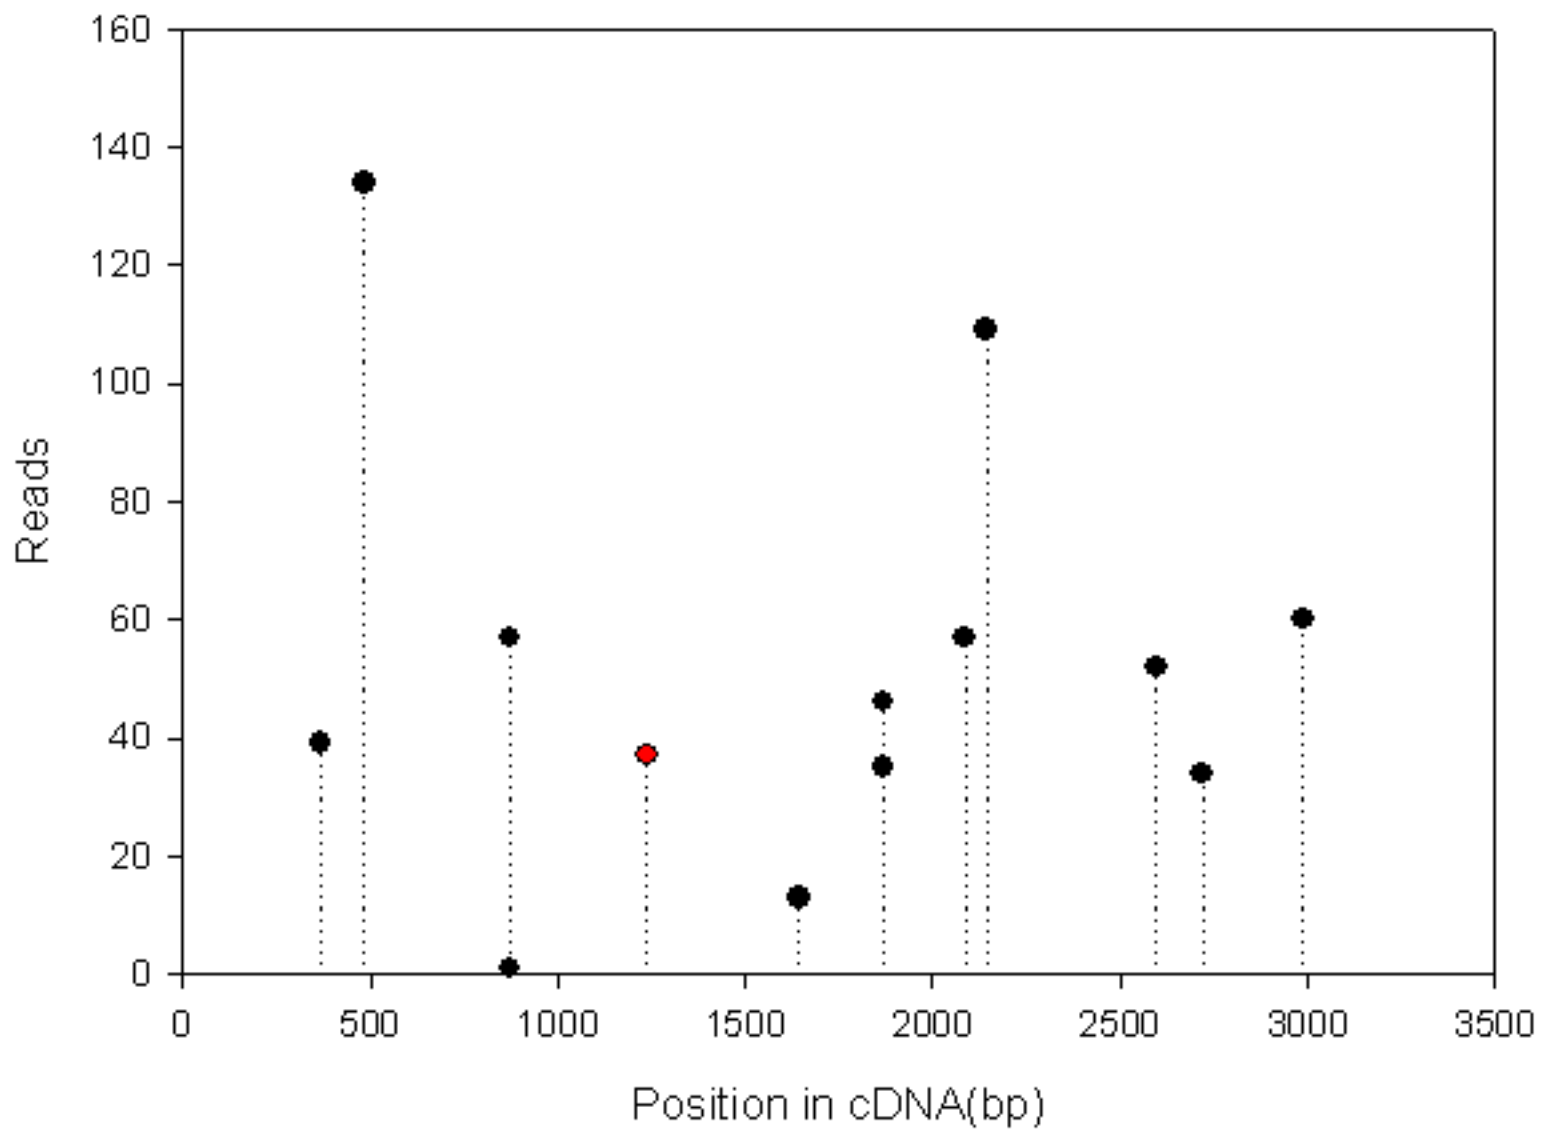

5' UCUGUUAAGGAAGCUAUGGAGCUUA 3'  
 :: :::::::::::::: :::::  
 3' ----AAGUUCUUUCGACACCU---- 5'

Cs8g04510.1

Csi-miR396b.2

Csi-miR396b.2, target=Cs8g17370.1 gene=Cs8g17370  
 Category:3  
 Score=4.5  
 Cleavage Site=137

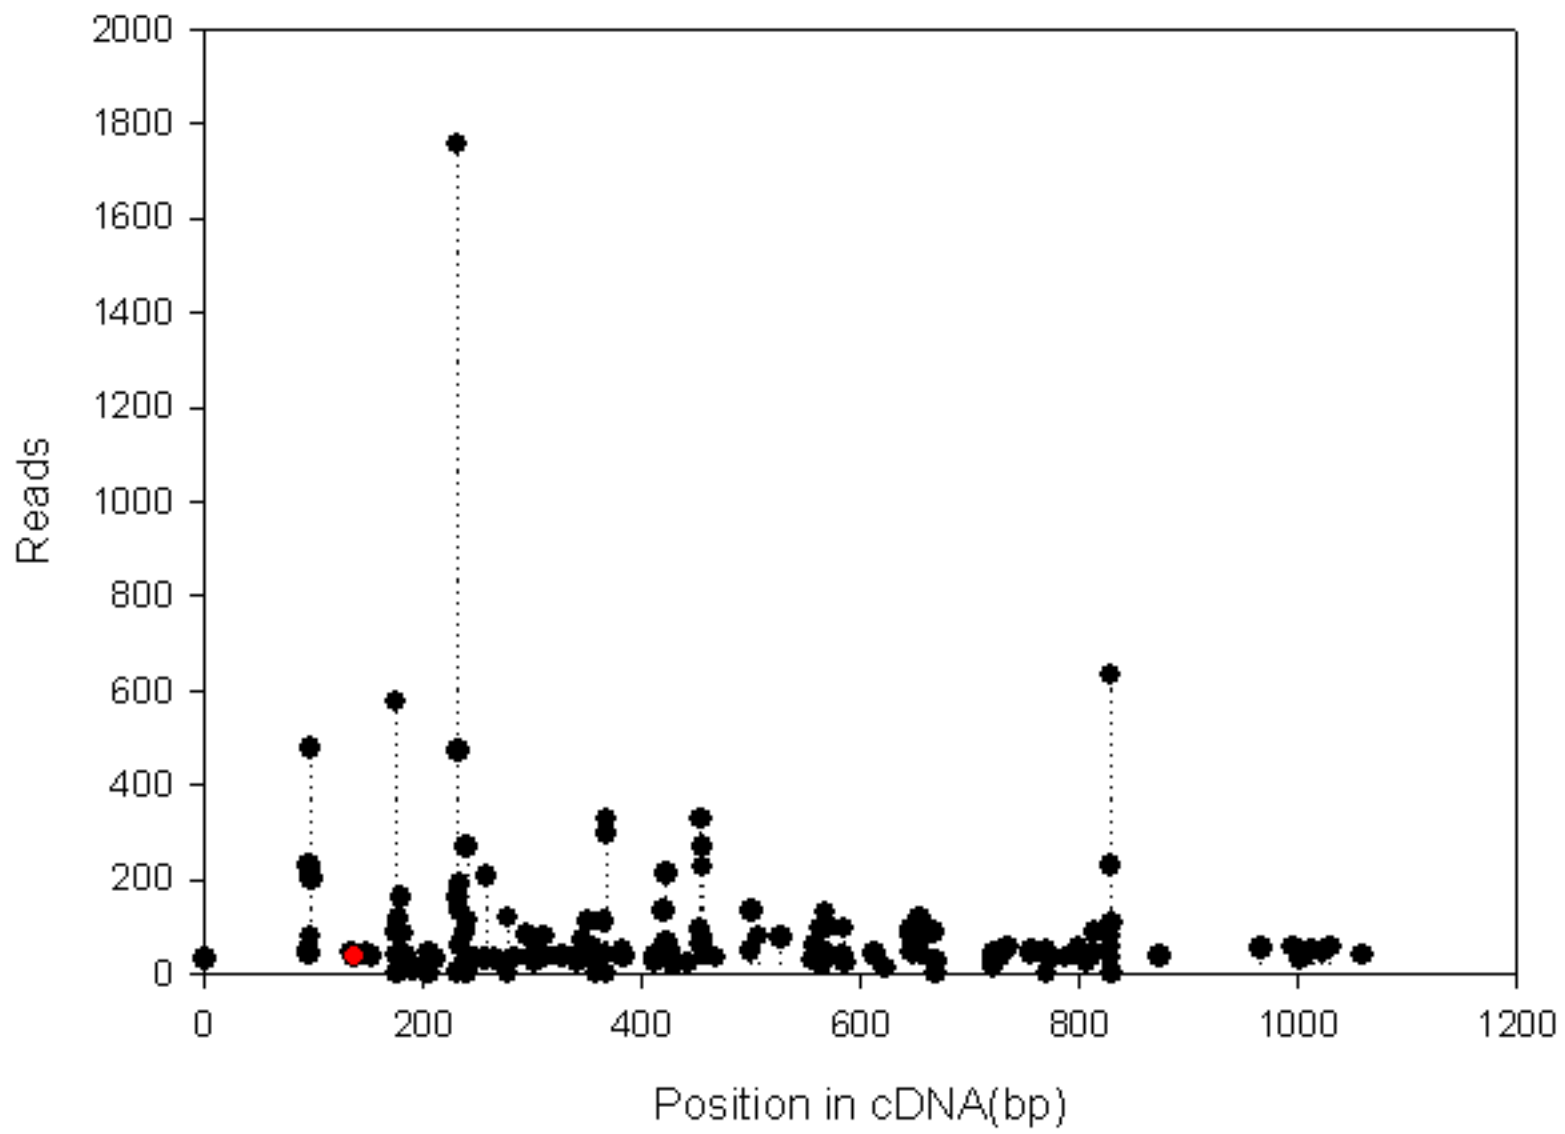

```

5' GCGAGGAUUACAAGAAGGCCGUGGAG 3'      Cs8g17370.1
   : : : : : : : : : : : : : : : :
3' -----AAGUUCUUUCGACACCUU 5'      Csi-miR396b.2

```

Csi-miR396b.2, target=Cs9g05650.1 gene=Cs9g0565  
 Category:2  
 Score=5  
 Cleavage Site=973

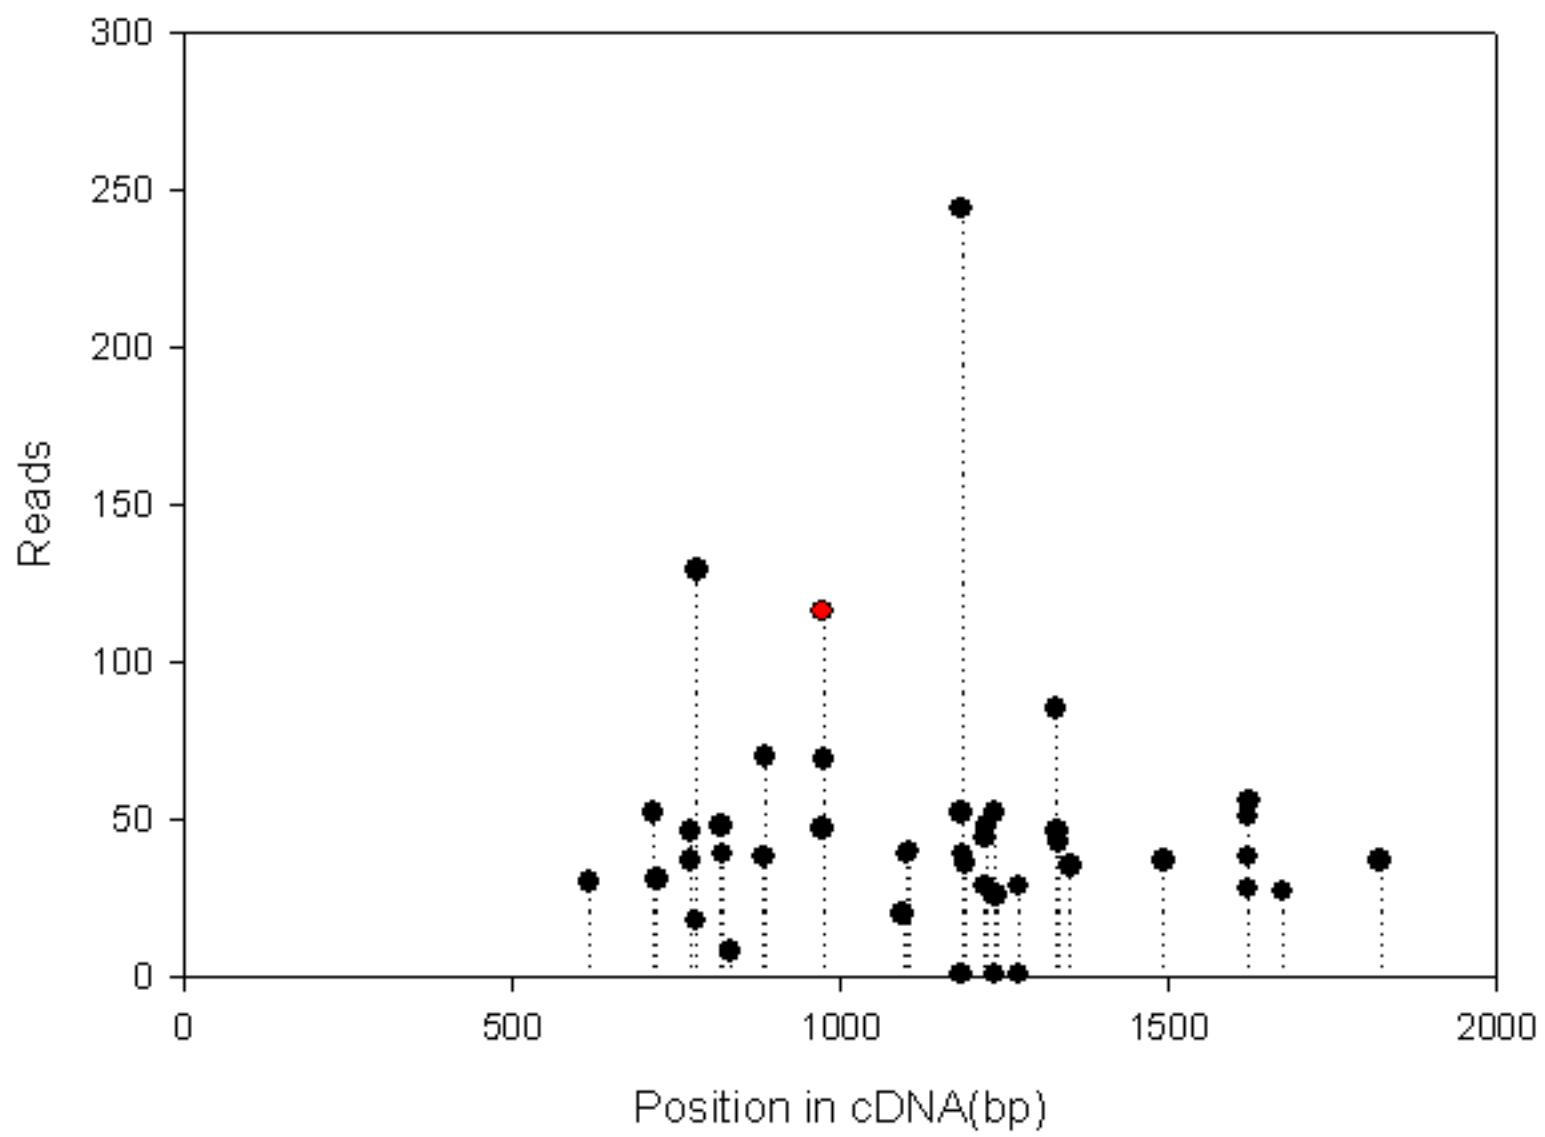

```

5' UUGUACUUGCAAUAAAGCU-UGGAAUG 3'
   :  :  :  :  :  :  :  :  :  :
3' -----AAGUUCUUUCGACACCUU-- 5'
  
```

Cs9g05650.1

Csi-miR396b.2

Csi-miR396b.2, target=Cs9g17470.1 gene=Cs9g17470  
 Category:3  
 Score=5  
 Cleavage Site=4344

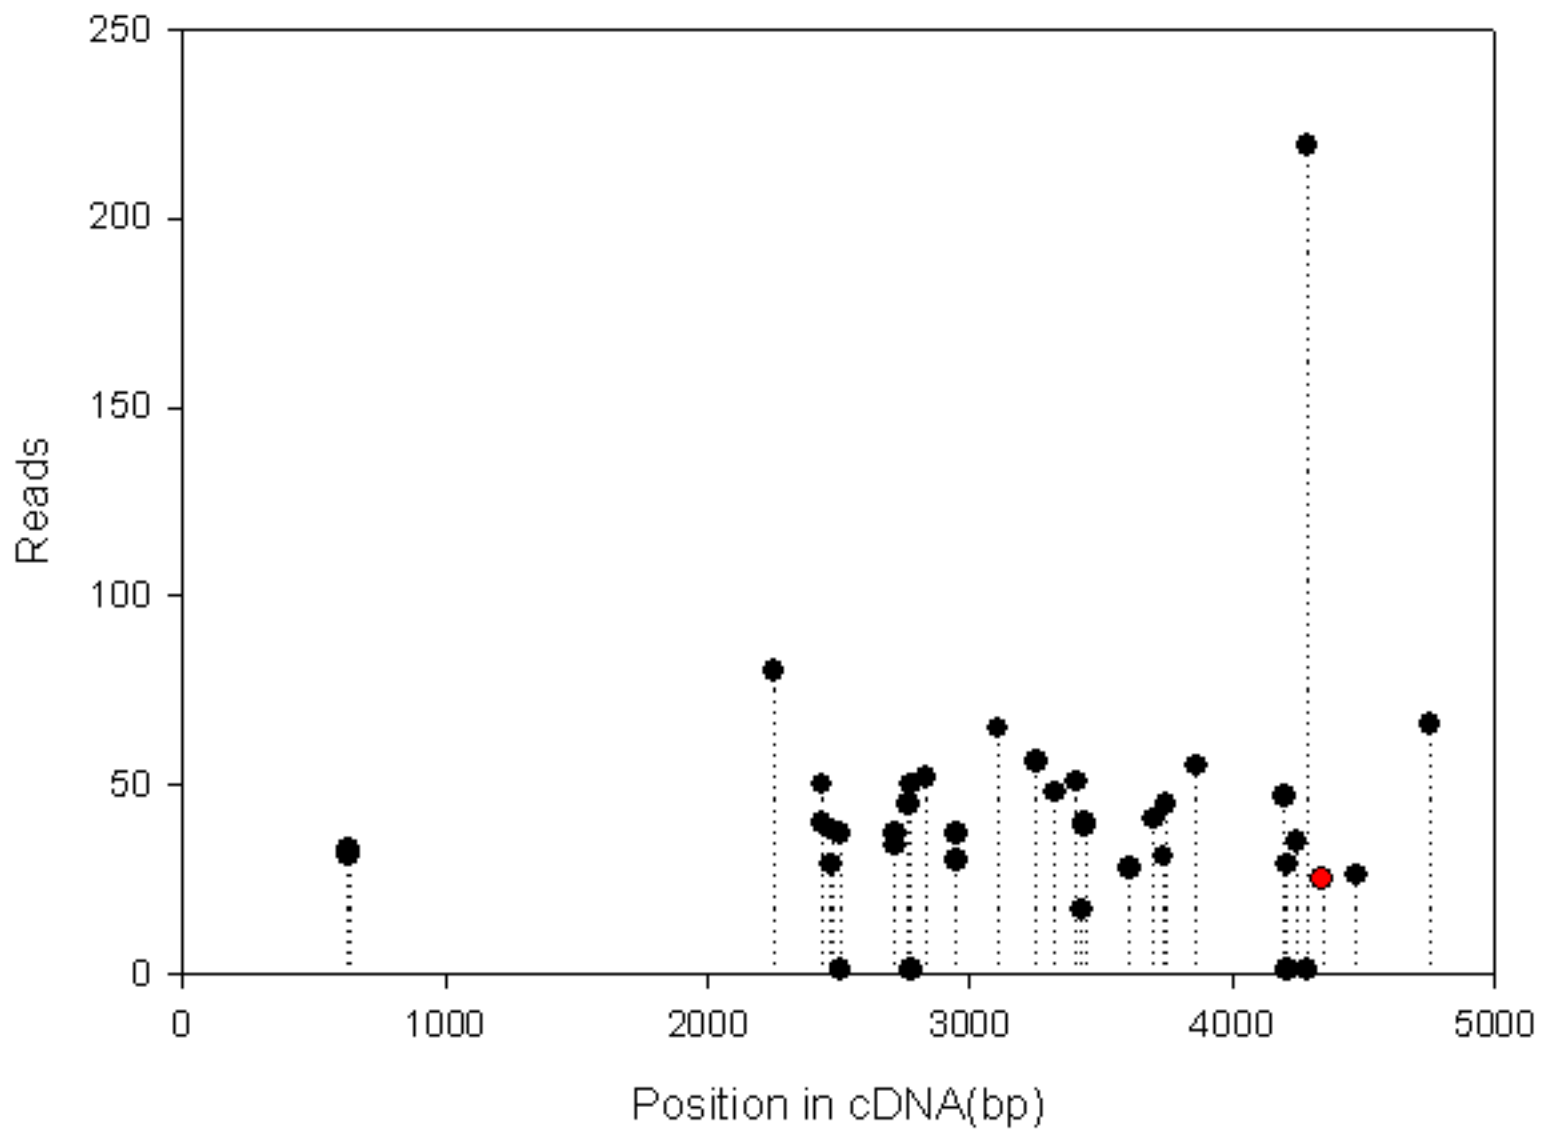

```

5' UAUGAGAAA-CUGUGGAUGCACGUGCG 3'      Cs9g17470.1
   : ..:::  :::::
3' AAGUUCUUUCGACACCUU----- 5'      Csi-miR396b.2

```

Csi-miR396b.2, target=Cs9g19220.1 gene=Cs9g19220  
 Category:3  
 Score=3.5  
 Cleavage Site=1829

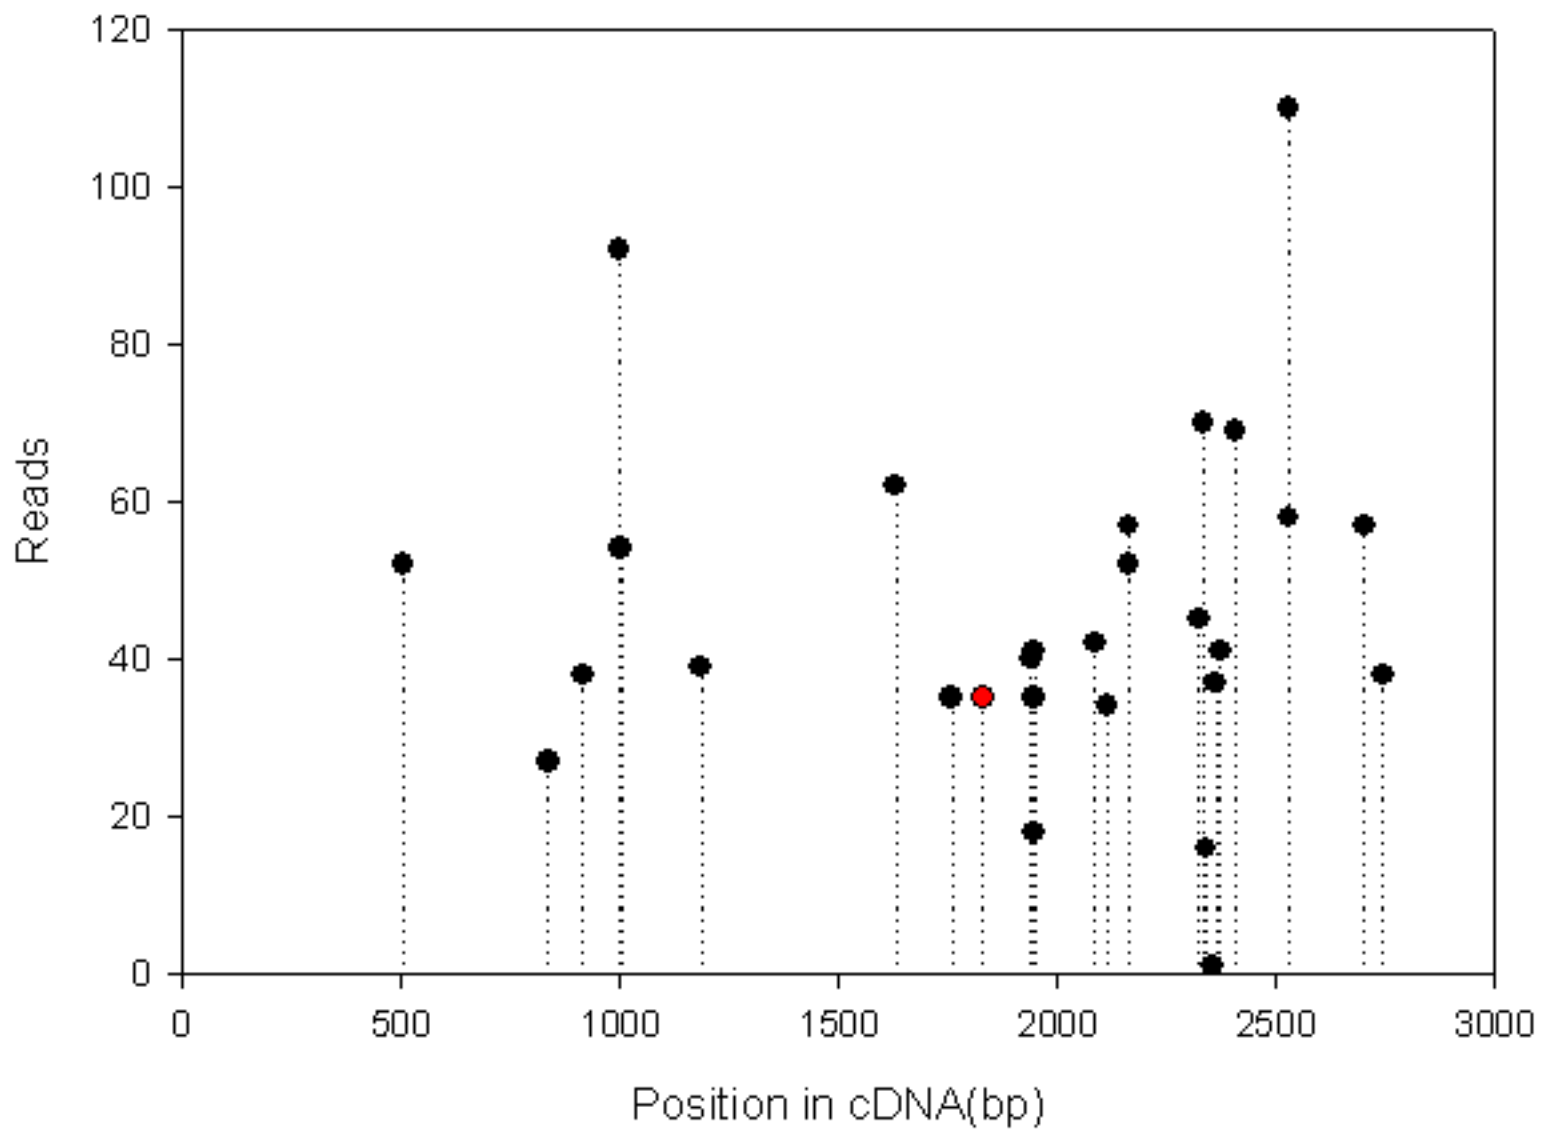

5' GGUGAGAGCAAGAAGGCUGUGGAGAA 3'  
 .....  
 3' -----AAGUUCUUUCGACACCUU-- 5'

Cs9g19220.1

Csi-miR396b.2



Csi-miR396b.2, target=Orange1.1t01932.1 gene=Orange1.1t01932  
 Category:3  
 Score=5  
 Cleavage Site=968

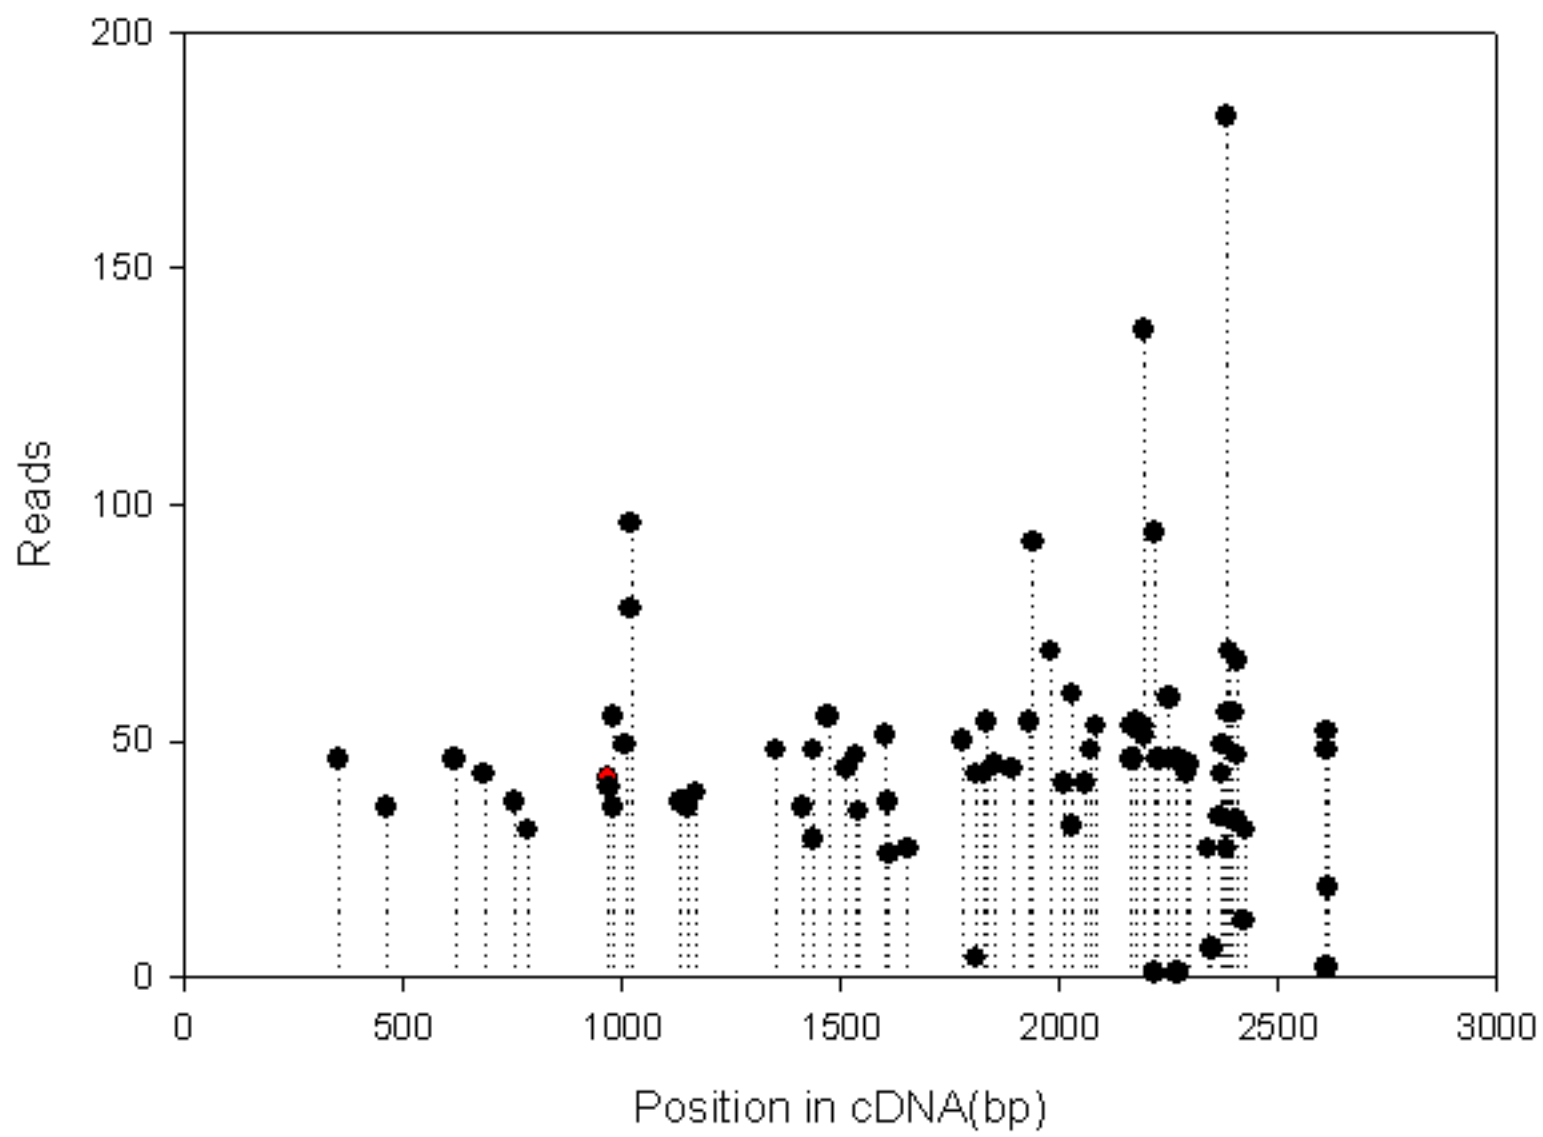

```

5' UCAGGUCUUGAGAAAGCUUGUGGAUG 3'      Orange1.1t01932.1
   :.:.:.:.:.:.:.:.:.:.:.:.:.:.
3' -----AAGUUCUUUCG-ACACCUU- 5'      Csi-miR396b.2
  
```

Csi-miR396b.2, target=Orange1.1t02254.1 gene=Orange1.1t02254  
 Category:3  
 Score=2.5  
 Cleavage Site=1371



```

5' GUUGCUGAAGAAAGCUGUGGAGGAUC 3'
   : : : : : : : : : : : : : : :
3' ----AAGUUCUUUCGACACCUU---- 5'
  
```

```

Orange1.1t02254.1
Csi-miR396b.2
  
```

Csi-miR396b.2, target=Orange1.1t02489.1 gene=Orange1.1t02489  
 Category:3  
 Score=5  
 Cleavage Site=182

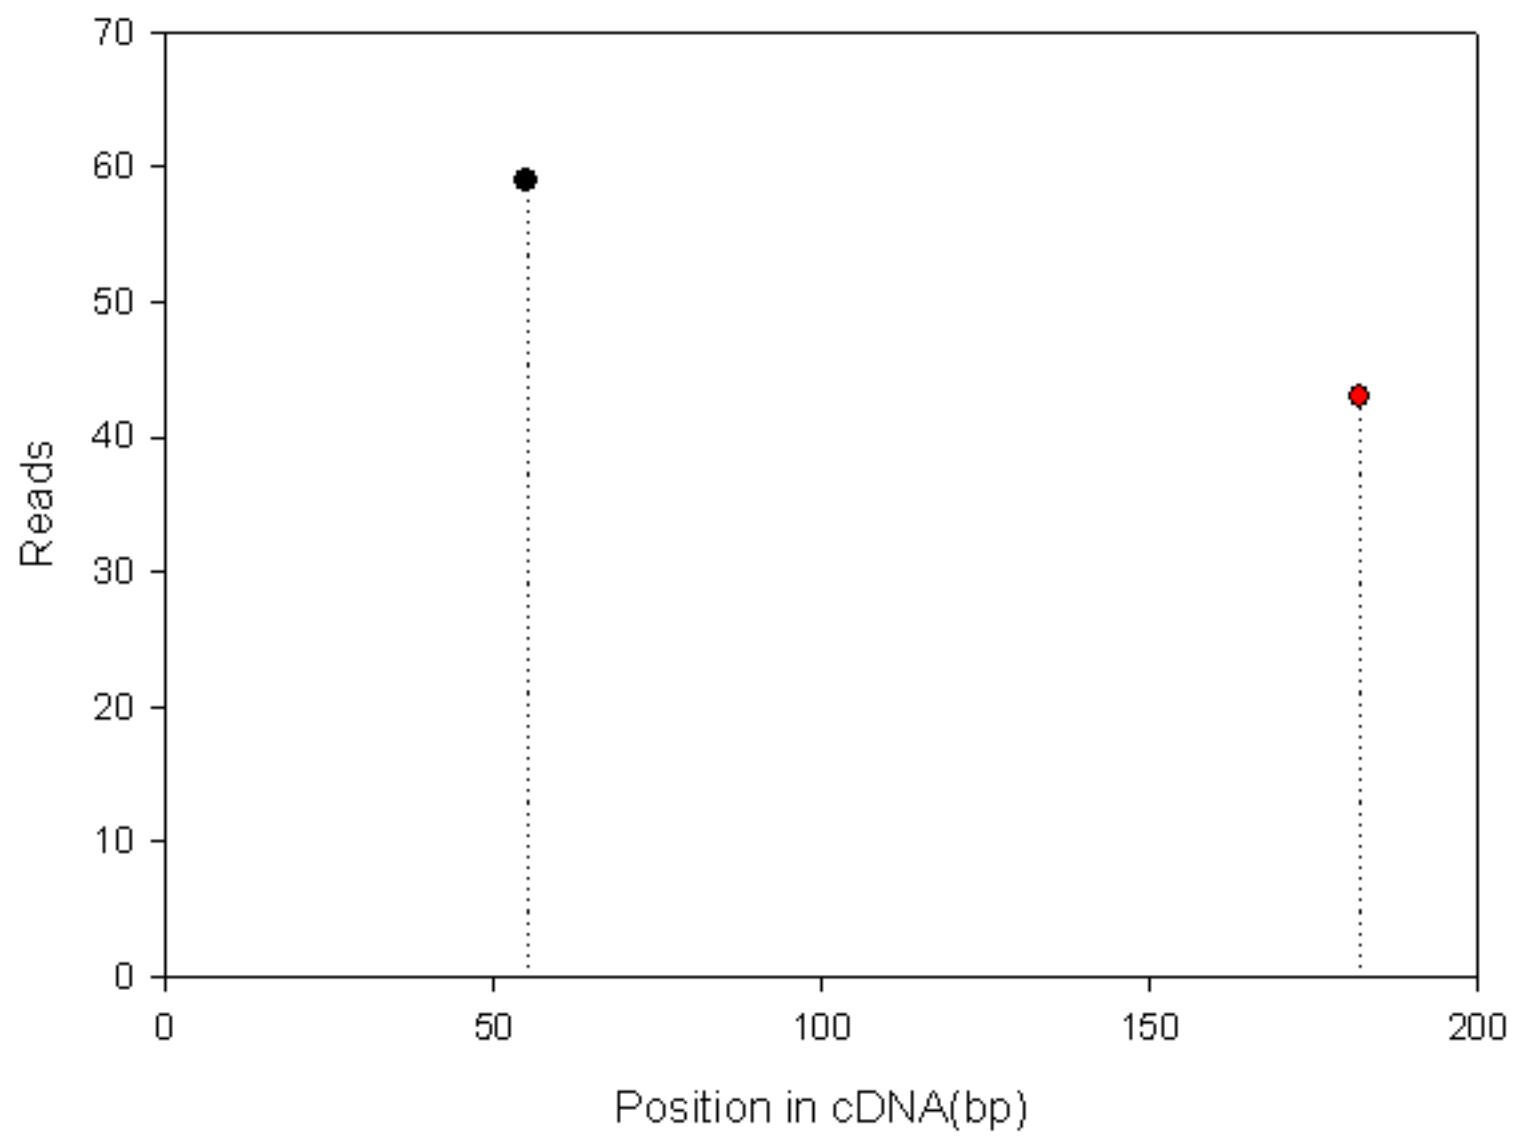

```

5' UUAUAUUCACUAAAGCUG-GGAAAAUC 3'      Orange1.1t02489.1
   : : : : : : : : : : : : : : : :
3' -----AAGUUCUUUCGACACCUU----- 5'    Csi-miR396b.2
  
```

Csi-miR396b.2, target=Orange1.1t02492.1 gene=Orange1.1t02492  
 Category:3  
 Score=5  
 Cleavage Site=1009

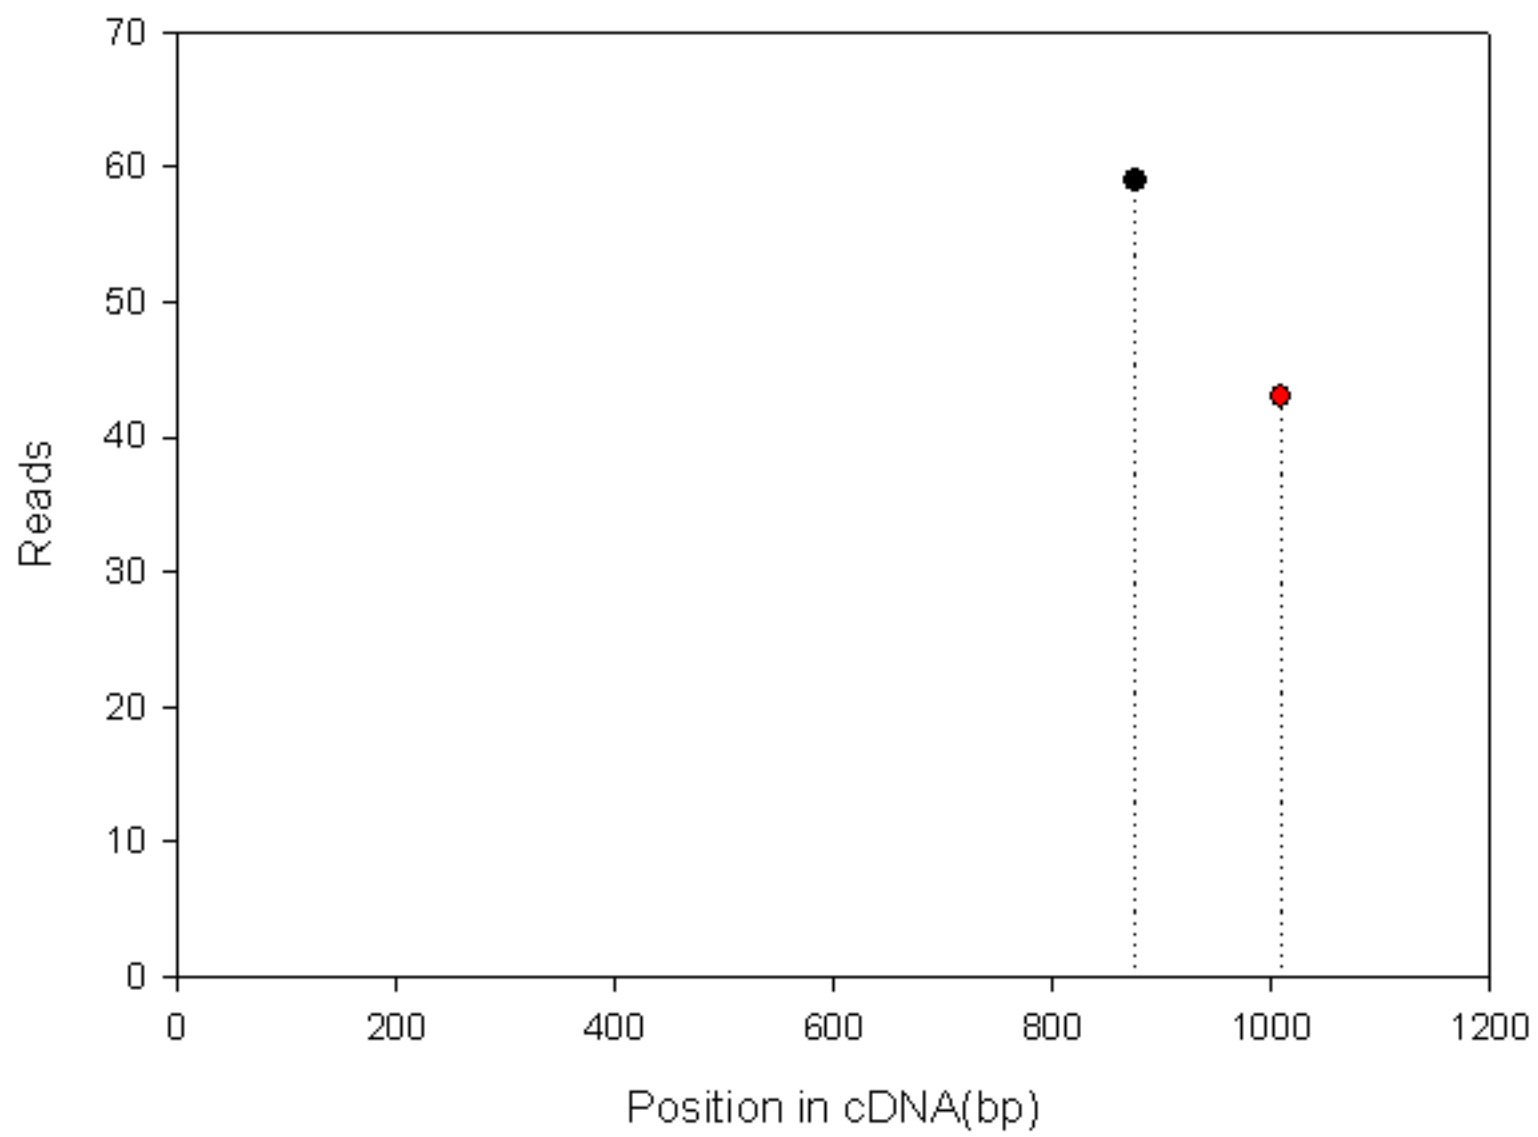

```

5' UUAUAUUCACUAAAGCUG-GGAAAUC 3'      Orange1.1t02492.1
   : : : : : : : : : : : : : : :
3' -----AAGUUCUUUCGACACCU----- 5'    Csi-miR396b.2
  
```

Csi-miR396b.2, target=orange1.1t02555.1 gene=orange1.1t02555  
Category:1  
Score=2  
Cleavage Site=920

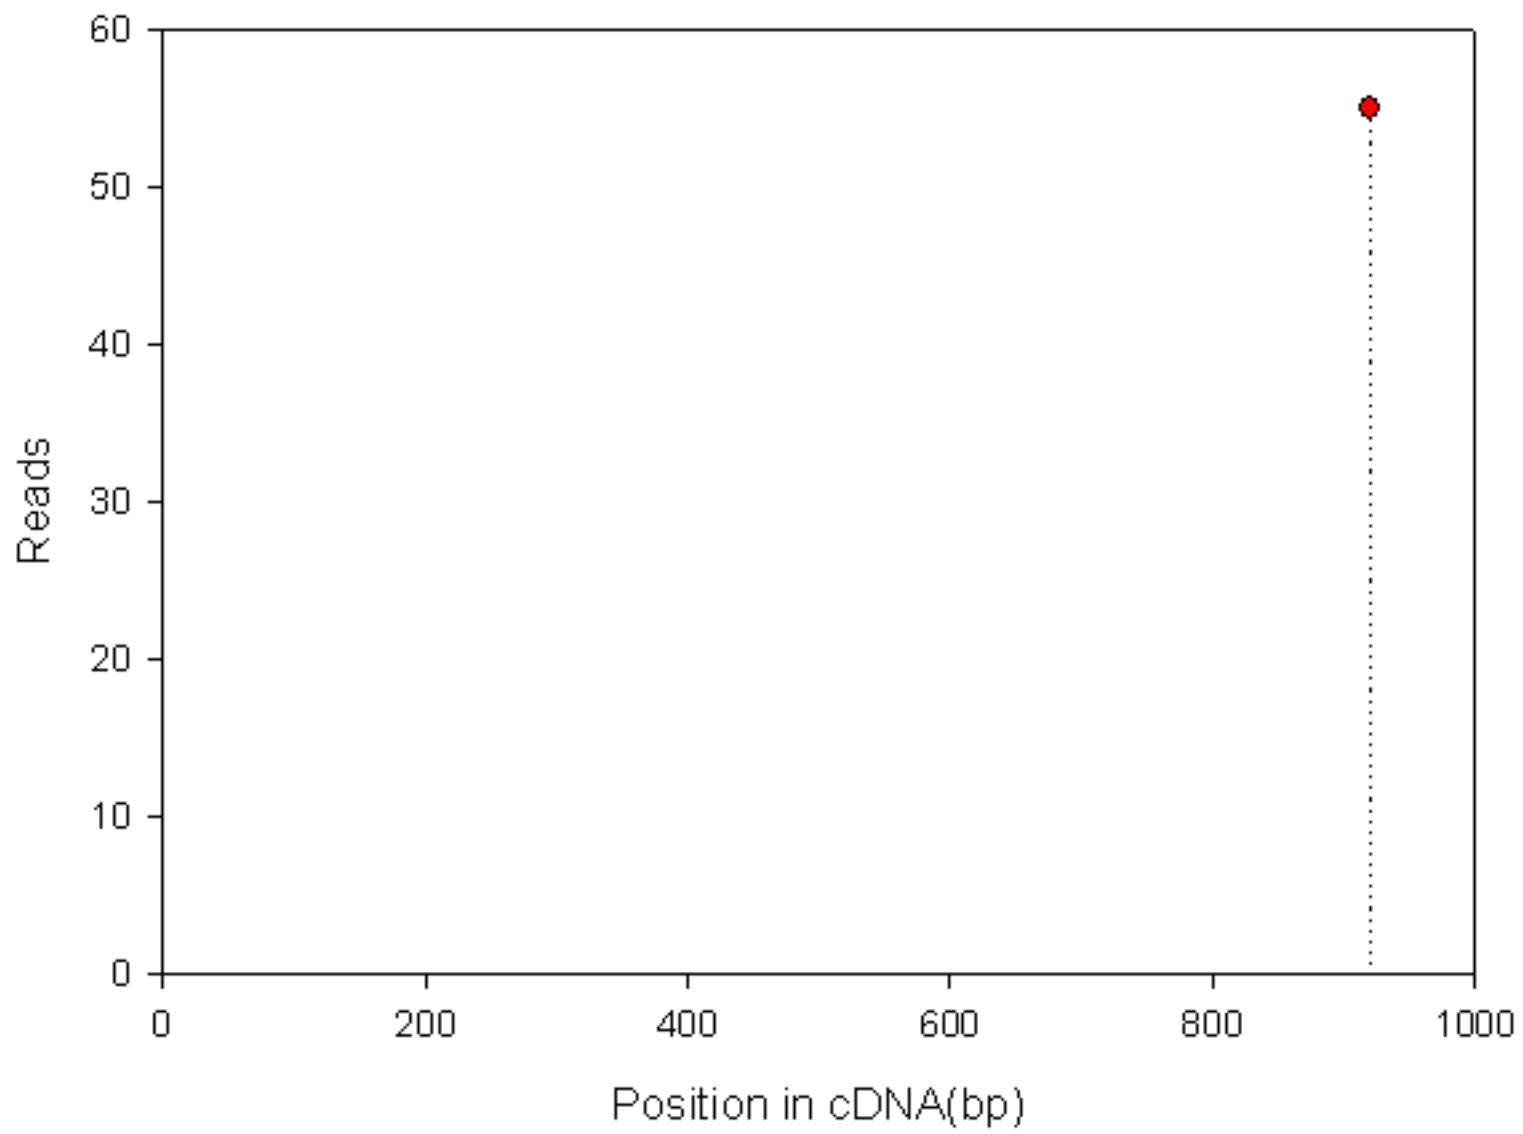

```
5' CACGUUCAAGAAAGCCUGUGGAACUU 3' Orange1.1t02555.1
   ::::::::::: :::::::::::
3' ----AAGUUCUUUC-GACACCUU---- 5' Csi-miR396b.2
```

Csi-miR396b.2, target=orange1.1t03122.1 gene=orange1.1t03122  
 Category:2  
 Score=2  
 Cleavage Site=583

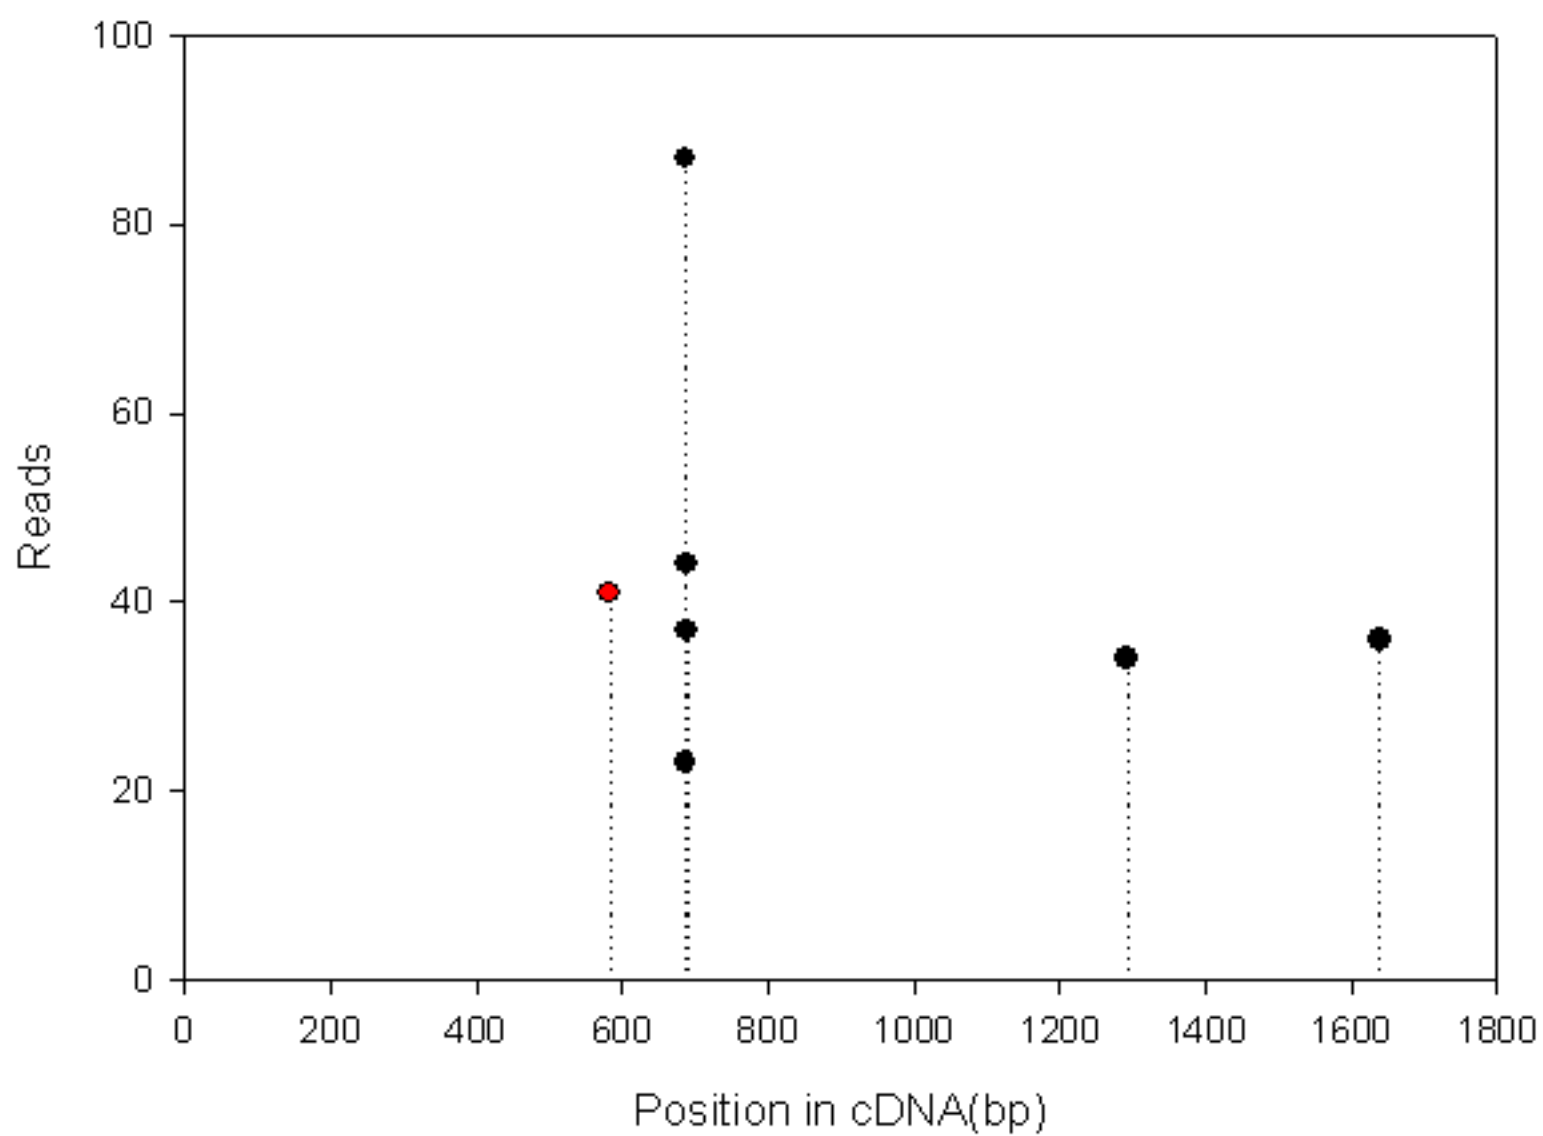

5' ACCGUUCAAGAAAGCCUGUGGAAUCA 3'  
 :::::::::::::: ::::::::::::::  
 3' ----AAGUUCUUUC-GACACCUU---- 5'

Orange1.1t03122.1  
 Csi-miR396b.2

Csi-miR396b.3, target=Cs3g23180.1 gene=Cs3g23180  
 Category: 3  
 Score=3  
 Cleavage Site=625

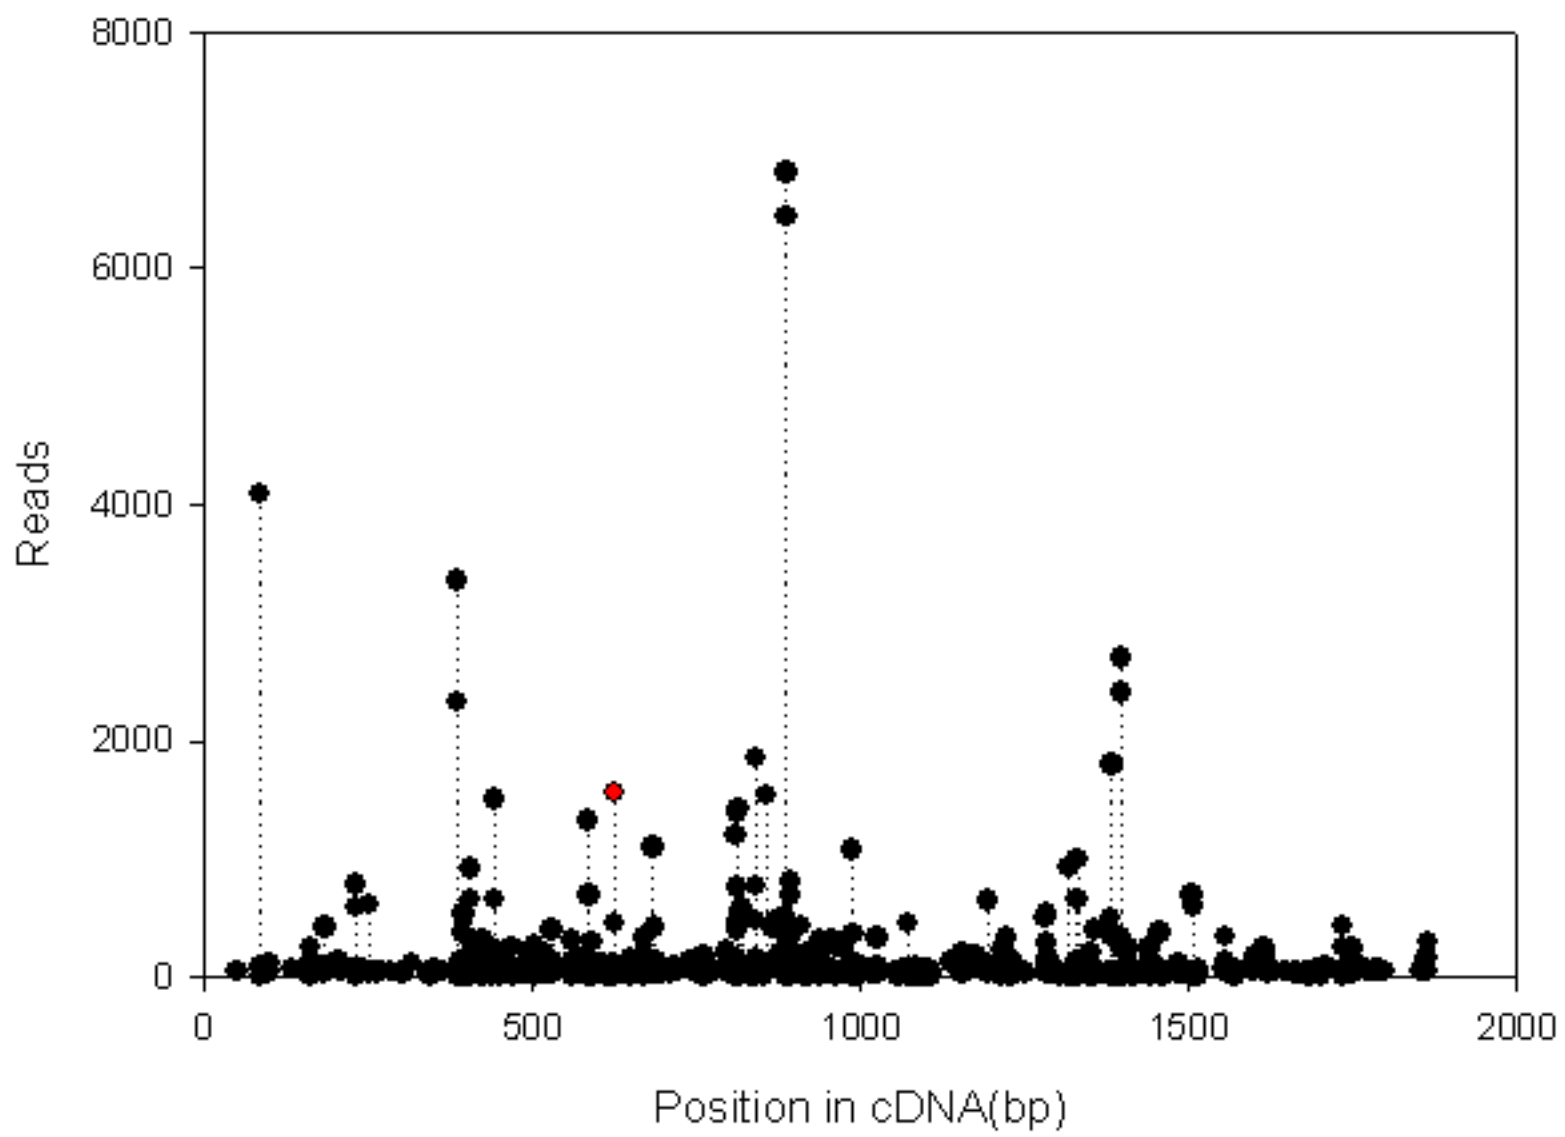

```

5' AAAGAUCAAGGAAGCUGUGGGAGUUG 3'      Cs3g23180.1
   ::: :::::::::::::::::::::
3' -UUCAAGUUCUUUCGACACCUU----- 5'    Csi-miR396b.3
  
```

Csi-miR396b.3, target=Cs5g01380.1 gene=Cs5g01380  
 Category:1  
 Score=4  
 Cleavage Site=1181



5' CCGUUCAAGAAAGCCUGUGGAAUUA 3'

Cs5g01380.1

          :::          :::

3' -UUCAAGUUCUUUC-GACACCUU--- 5'

Csi-miR396b.3



Csi-miR396b.3, target=Cs5g19200.1 gene=Cs5g19200  
 Category:2  
 Score=3.5  
 Cleavage Site=201



```

5' AAUGUUUAAGAAAGCAGUGGAAGCAA 3'          Cs5g19200.1
  : :.:.:.:.:.:.:.:.:.:.:.:.:.:.:
3' -UUCAAGUUCUUUCGACACCUU----- 5'       Csi-miR396b.3
  
```

Csi-miR396b.3, target=Cs7g12930.1 gene=Cs7g12930  
 Category:1  
 Score=4.5  
 Cleavage Site=1079



5' UAGUAUUAAGAAAGCUGAGGAAAAAG 3'  
 ::: :.:.:.:.:.:.:.:.:.:.  
 3' UUCA-AGUUCUUUCGACACCUU---- 5'

Cs7g12930.1

Csi-miR396b.3

Csi-miR396b.3, target=Cs7g15220.1 gene=Cs7g15220  
Category:1  
Score=4  
Cleavage Site=377

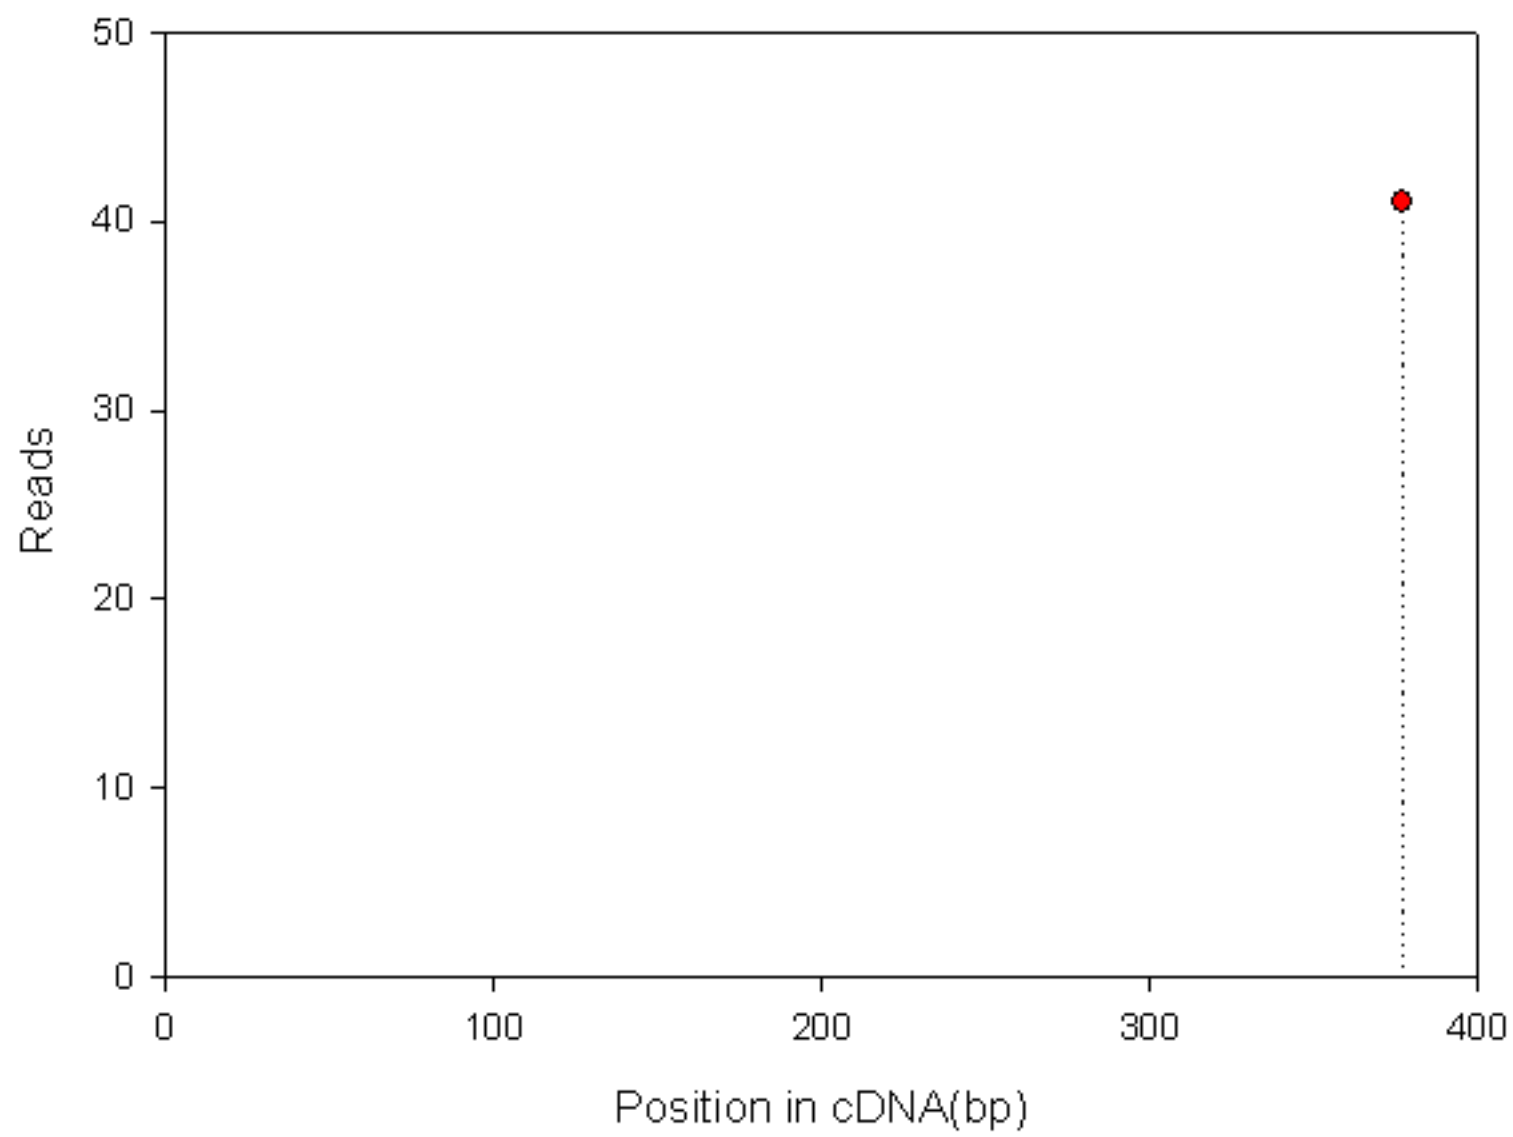

```
5' ACCGUUCAAGAAAGCCUGUGGAAUCA 3'      Cs7g15220.1
   :::::::::::::: ::::::::::::::
3' -UUCAAGUUCUUUC-GACACCUU--- 5'      Csi-miR396b.3
```

Csi-miR396b.3, target=Cs9g19220.1 gene=Cs9g19220  
 Category:3  
 Score=4  
 Cleavage Site=1829



5' GGUGAGAGCAAGAAGGCUGUGGAGAA 3'  
 . . . . .  
 3' ---UUCAAGUUCUUUCGACACCUU-- 5'

Cs9g19220.1

Csi-miR396b.3

Csi-miR396b.3, target=Orange1.1t02254.1 gene=Orange1.1t02254  
 Category:3  
 Score=4.5  
 Cleavage Site=1371



|                                  |                   |
|----------------------------------|-------------------|
| 5' GUUGCUGAAGAAAGCUGUGGAGGAUC 3' | Orange1.1t02254.1 |
| : : : : : : : : : : : : : : : .  |                   |
| 3' -UUCAAGUUCUUUCGACACCUU---- 5' | Csi-miR396b.3     |

Csi-miR396b.3, target=Orange1.1t02555.1 gene=Orange1.1t02555  
 Category:1  
 Score=3  
 Cleavage Site=920



```

5' CACGUUCAAGAAAGCCUGUGGAACUU 3'      Orange1.1t02555.1
   : : : : : : : : : : : : : : : :
3' -UUCAAGUUCUUUC-GACACCUU--- 5'      Csi-miR396b.3
  
```

Csi-miR396b.3, target=Orange1.1t03122.1 gene=Orange1.1t03122  
 Category:2  
 Score=4  
 Cleavage Site=583



5' ACCGUUCAAGAAAGCCUGUGGAAUCA 3'  
 :::::::::::::: ::::::::::  
 3' -UUCAAGUUCUUUC-GACACCUU--- 5'

Orange1.1t03122.1  
 Csi-miR396b.3

Csi-miR396b-3p.2, target=Cs8g05290.1 gene=Cs8g05290  
 Category:2  
 Score=3.5  
 Cleavage Site=160

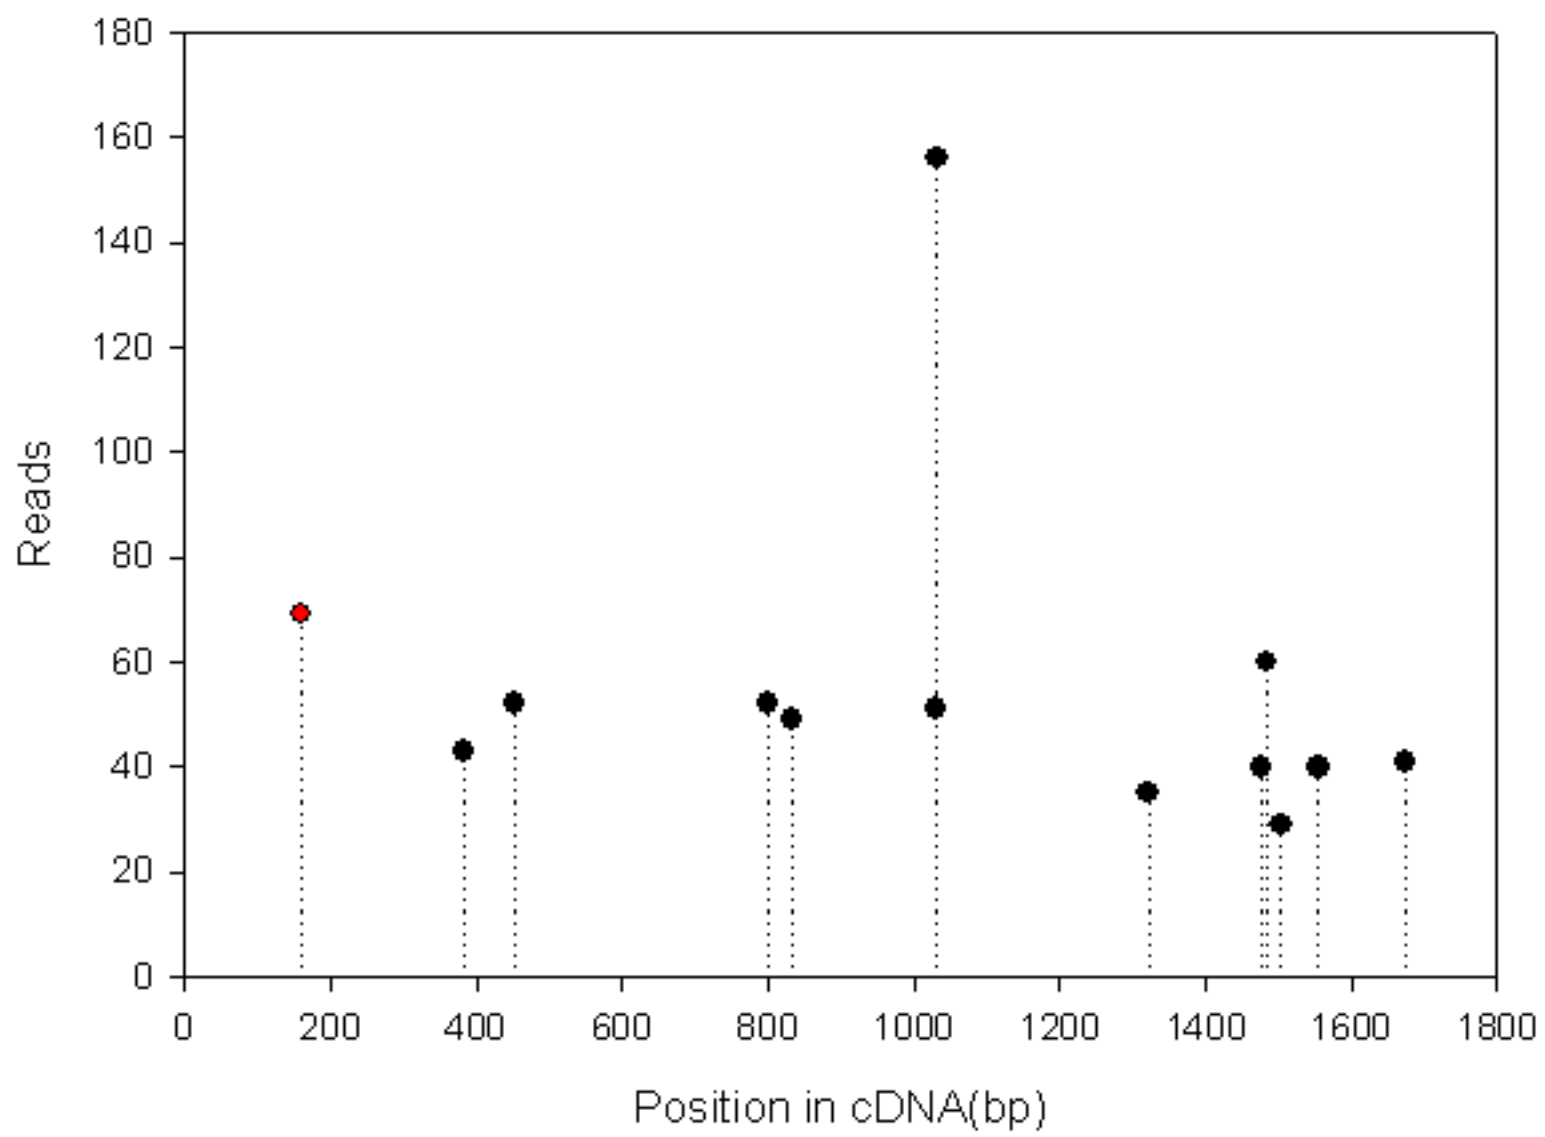

5' UAUUUUUACGGCUUUCUUGAGUCCA 3'  
 : .....  
 3' --AGAGGGUGUCGAAAGAACUC---- 5'

Cs8g05290.1

Csi-miR396b-3p.2



Csi-miR396c, target=Cs2g27200.1 gene=Cs2g27200  
 Category:3  
 Score=5  
 Cleavage Site=1455

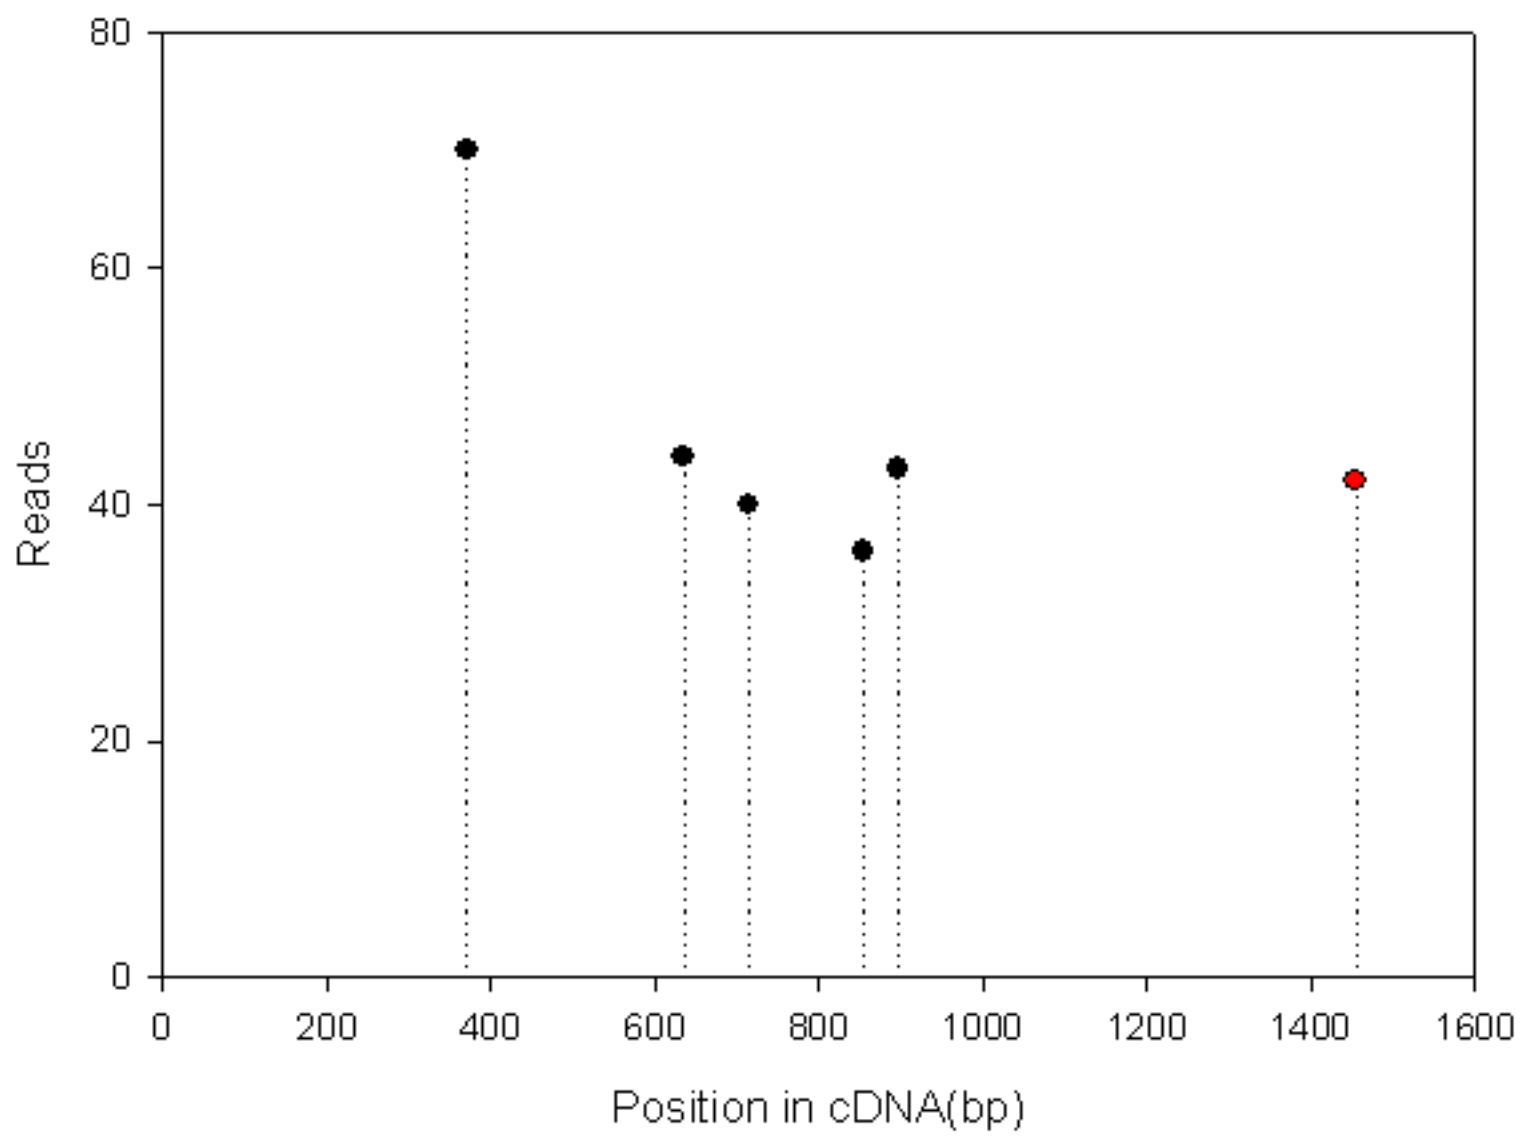

5' AUCUUCUGCAUAUUGUUGAACAAC 3'  
 :::::::::: : ::: : :::::  
 3' --GAAGGGUGUCUAAAGAACUU---- 5'

Cs2g27200.1

Csi-miR396c

Csi-miR396c, target=Cs5g07360.1 gene=Cs5g07360  
 Category:2  
 Score=5  
 Cleavage Site=3325

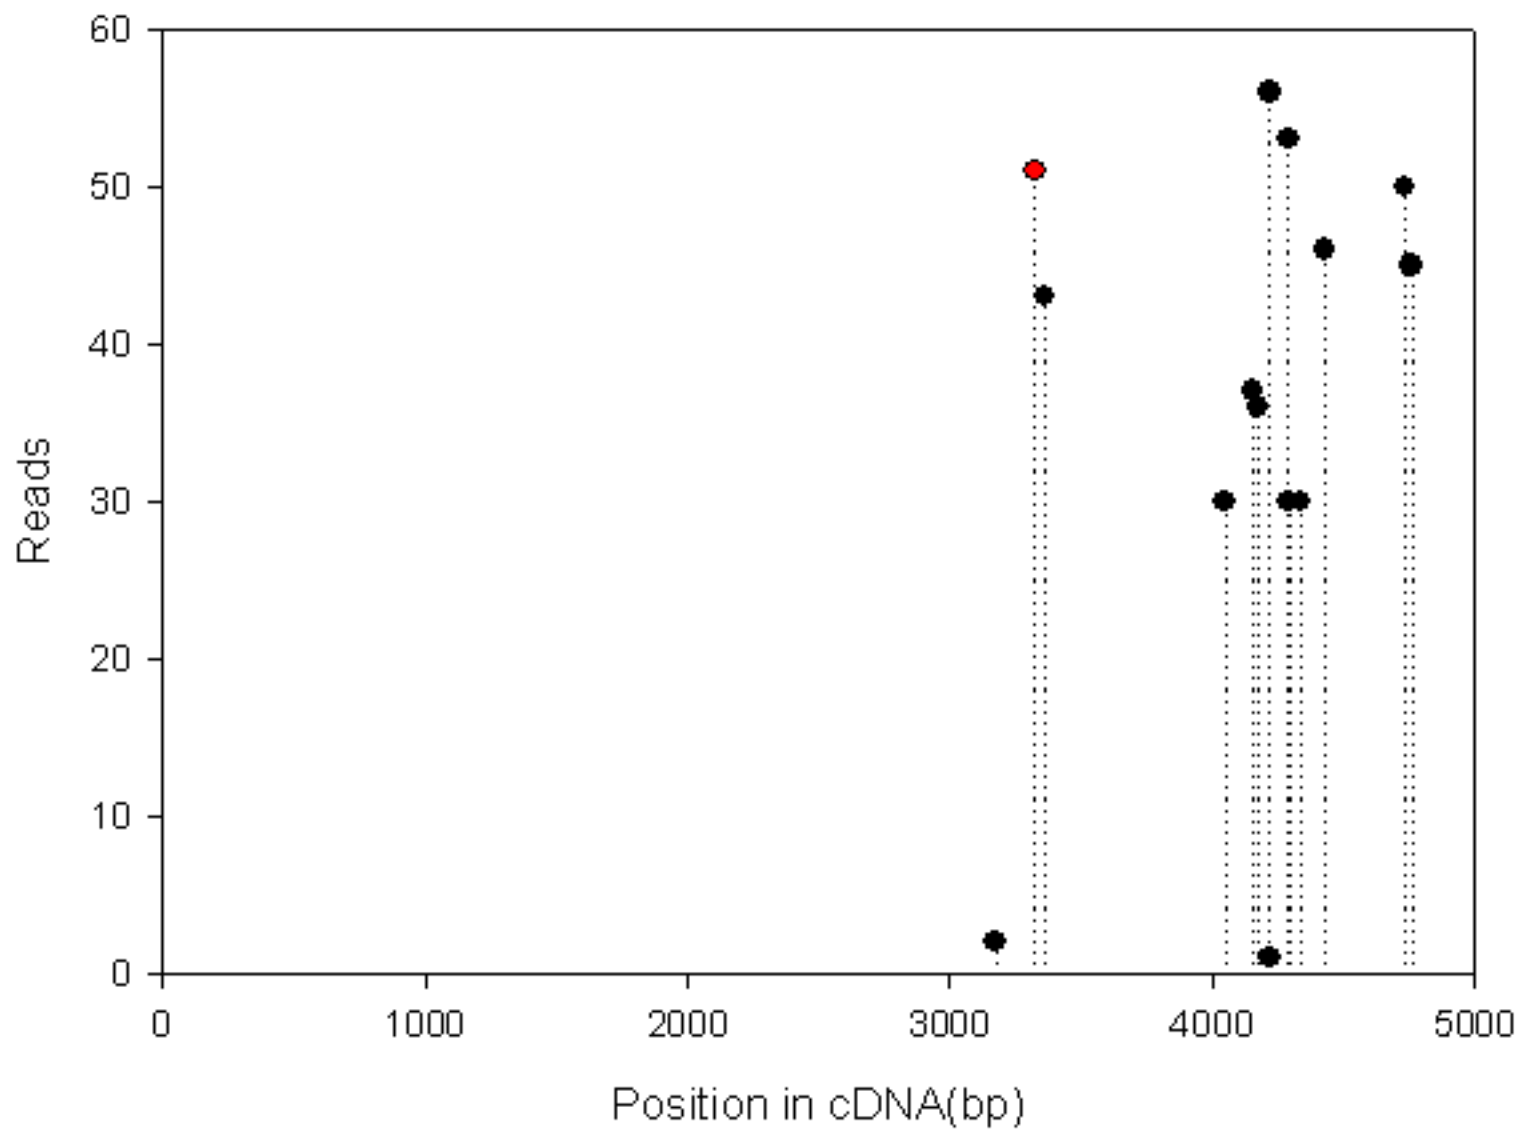

5' AUGCUUUUAACAGAUUUAUUGACGAG 3' Cs5g07360.1

.....

3' ---GAAGGGUGUCUAAAGAACUU--- 5' Csi-miR396c

Cs5g07360.1

Csi-miR396c

Csi-miR396d.1, target=Cs3g23180.1 gene=Cs3g23180  
 Category: 3  
 Score=4.5  
 Cleavage Site=625

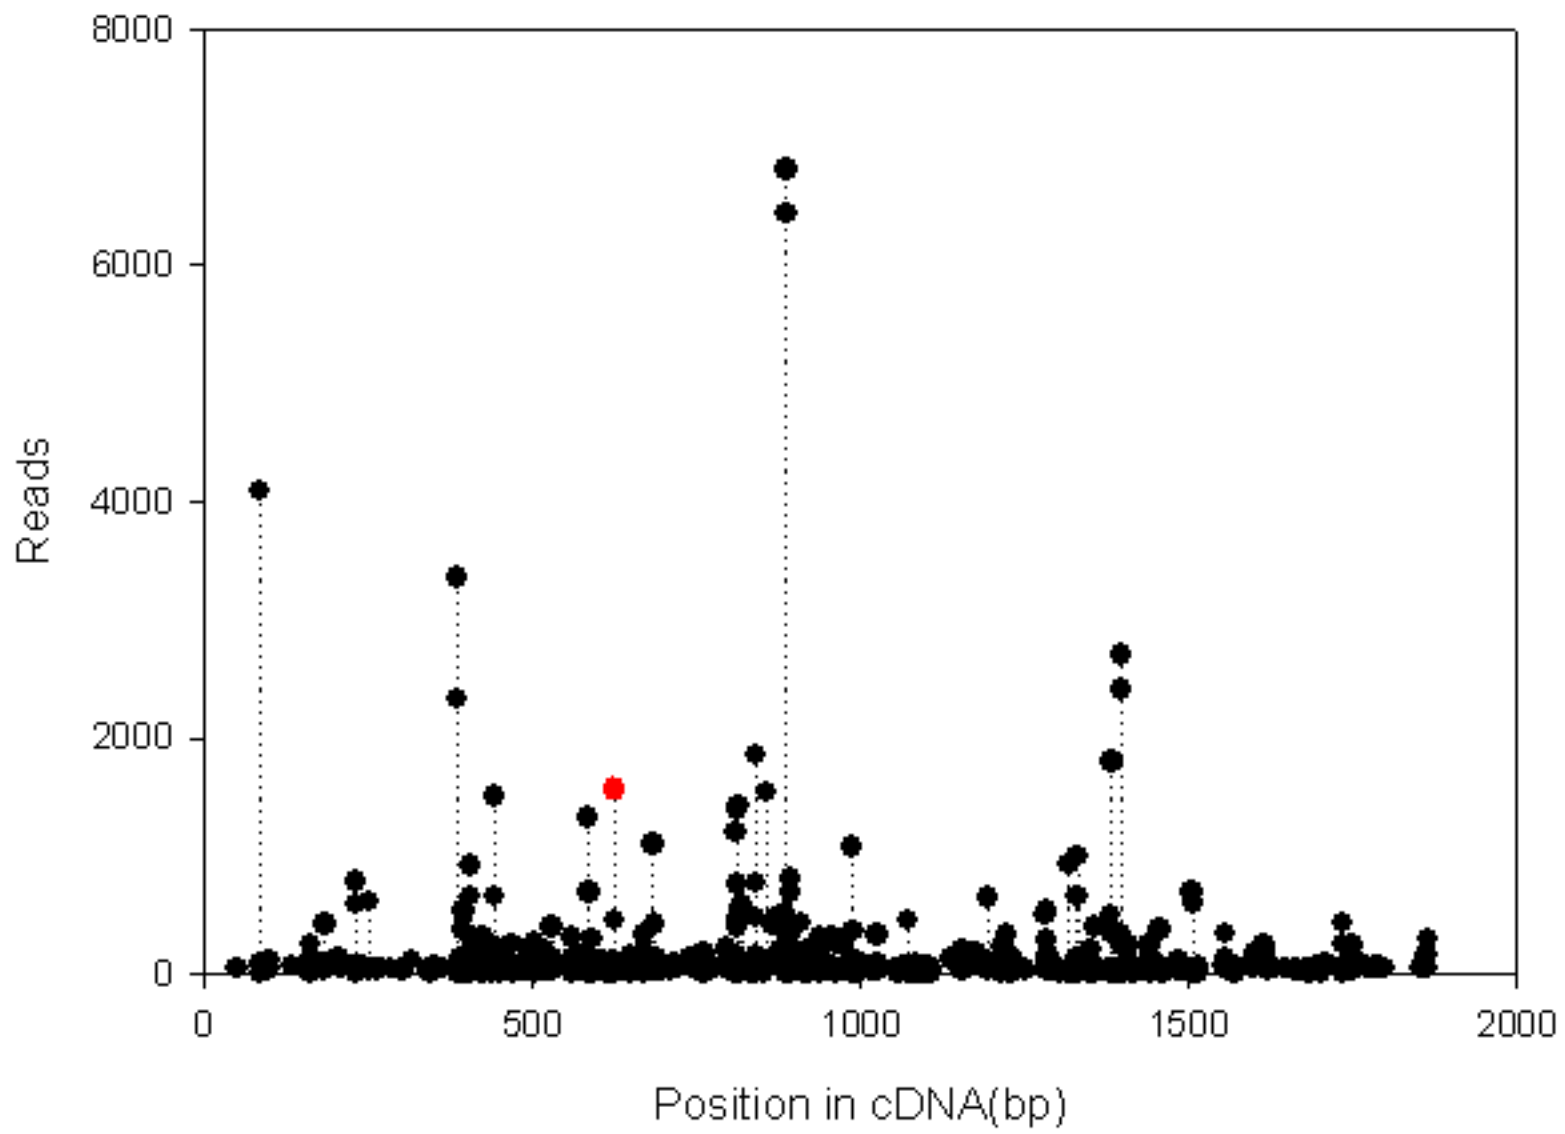

```

5' AAAGAUCAAGGAAGCUGUGGGAGUUG 3'      Cs3g23180.1
   :: ::::::::::::::::::::
3' --UCAAGUUCUUUCGGCACCUUU--- 5'      Csi-miR396d.1

```

Csi-miR396d.1, target=Cs4g12200.1 gene=Cs4g12200  
 Category:2  
 Score=4.5  
 Cleavage Site=228

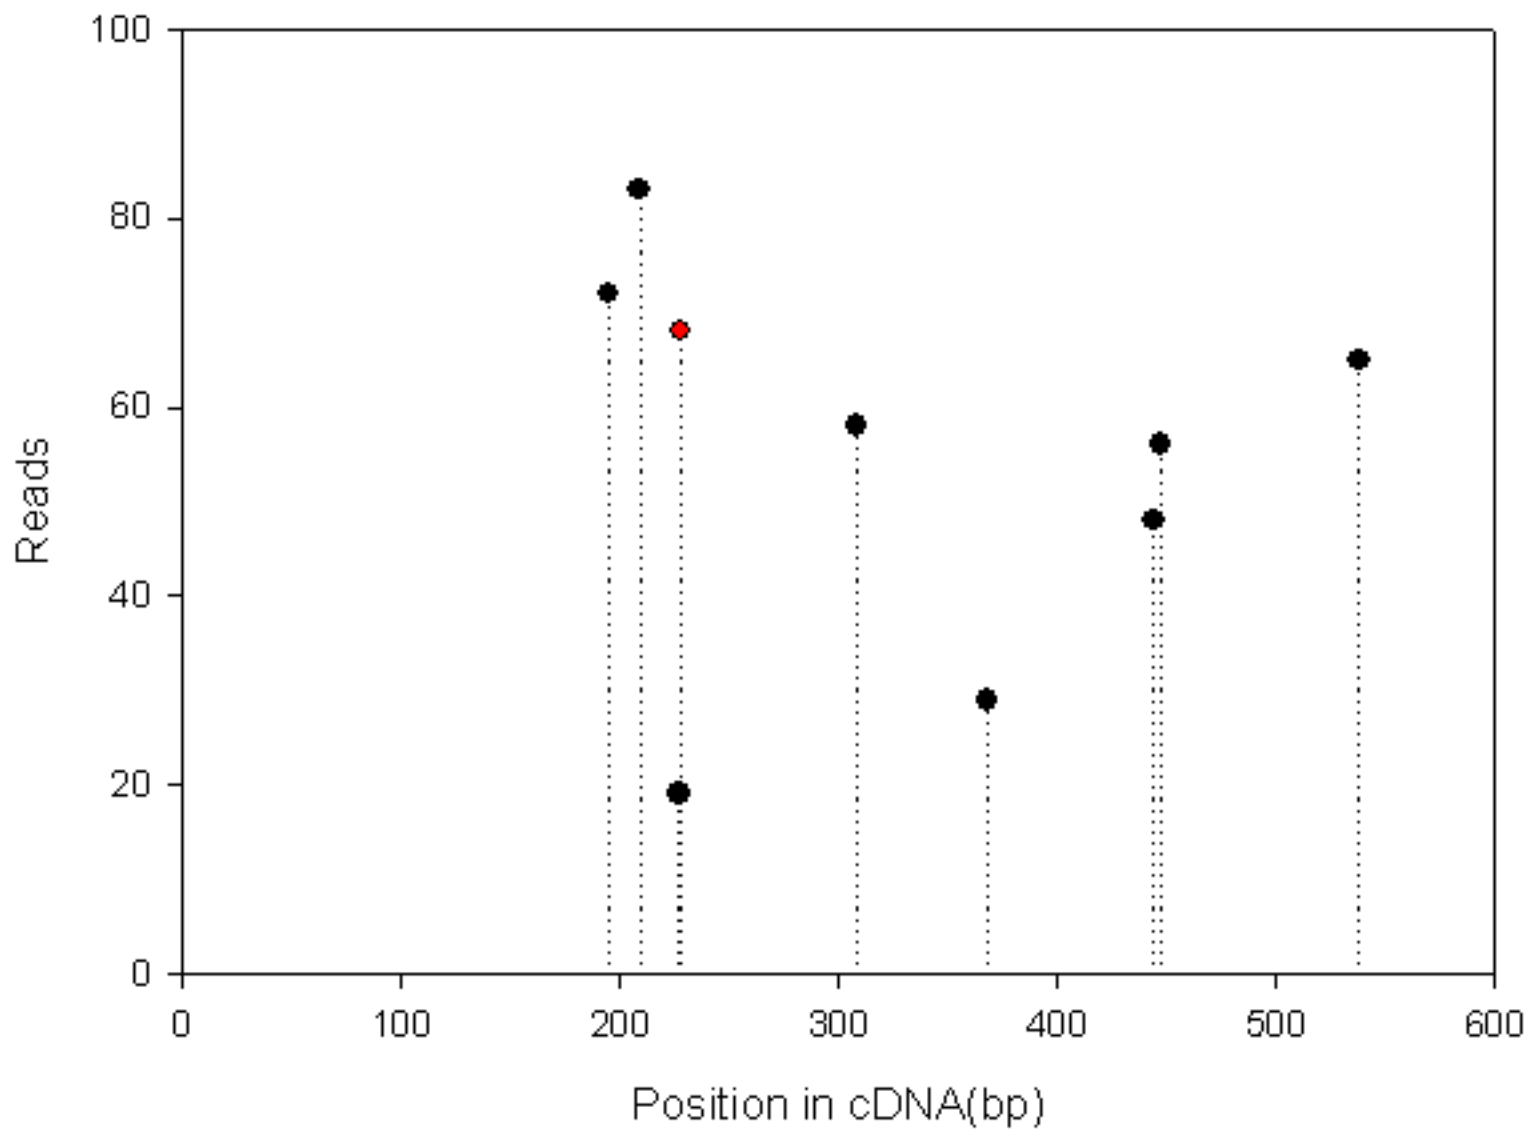

```

5' GGUUCCUGAAAGCCG-GGAAUAUGCU 3'      Cs4g12200.1
   . . . . . : : : : : : : : : . . . . .
3' UCAAGUUCUUUCGGCACCUUU----- 5'     Csi-miR396d.1
  
```

Csi-miR396d.1, target=Cs5g01380.1 gene=Cs5g01380  
 Category:1  
 Score=4  
 Cleavage Site=1181



```

5' CCGUUCAAGAAAGCCUGUGGAAUUA 3'      Cs5g01380.1
   ::::::::::::::: :::::
3' --UCAAGUUCUUUCGG-CACCUUU-- 5'      Csi-miR396d.1

```

Csi-miR396d.1, target=Cs5g19200.1 gene=Cs5g19200  
 Category:2  
 Score=4  
 Cleavage Site=201



5' AAUGUUUAAGAAAGCAGUGGAAGCAA 3'

Cs5g19200.1

.....

3' --UCAAGUUCUUUCGGCACCUUU--- 5'

Csi-miR396d.1

Csi-miR396d.1, target=Cs7g12930.1 gene=Cs7g12930  
 Category:1  
 Score=4.5  
 Cleavage Site=1079



```

5' UAGUAUUAAGAAAGCUGAGGAAAAAG 3'      Cs7g12930.1
   ::: :.:.:.:.:.:.:.:.:.:.:.:.:.
3' -UCA-AGUUCUUUCGGCACCUUU--- 5'      Csi-miR396d.1
  
```

Csi-miR396d.1, target=Cs7g15220.1 gene=Cs7g15220  
Category:1  
Score=4  
Cleavage Site=377



```
5' ACCGUUCAAGAAAGCCUGUGGAAUCA 3'      Cs7g15220.1
   :::::::::::::::::::: :::::
3' --UCAAGUUCUUUCGG-CACCUUU-- 5'      Csi-miR396d.1
```



Csi-miR396d.1, target=Cs9g19220.1 gene=Cs9g19220  
 Category:3  
 Score=5  
 Cleavage Site=1829



```

5' GGUGAGAGCAAGAAGGCUGUGGAGAA 3'      Cs9g19220.1
   :: : : : : : : : : : : : : : :
3' ----UCAAGUUCUUUCGGCACCUUU- 5'      Csi-miR396d.1
  
```



Csi-miR396d.1, target=orange1.1t03122.1 gene=orange1.1t03122

Category:2

Score=4

Cleavage Site=583

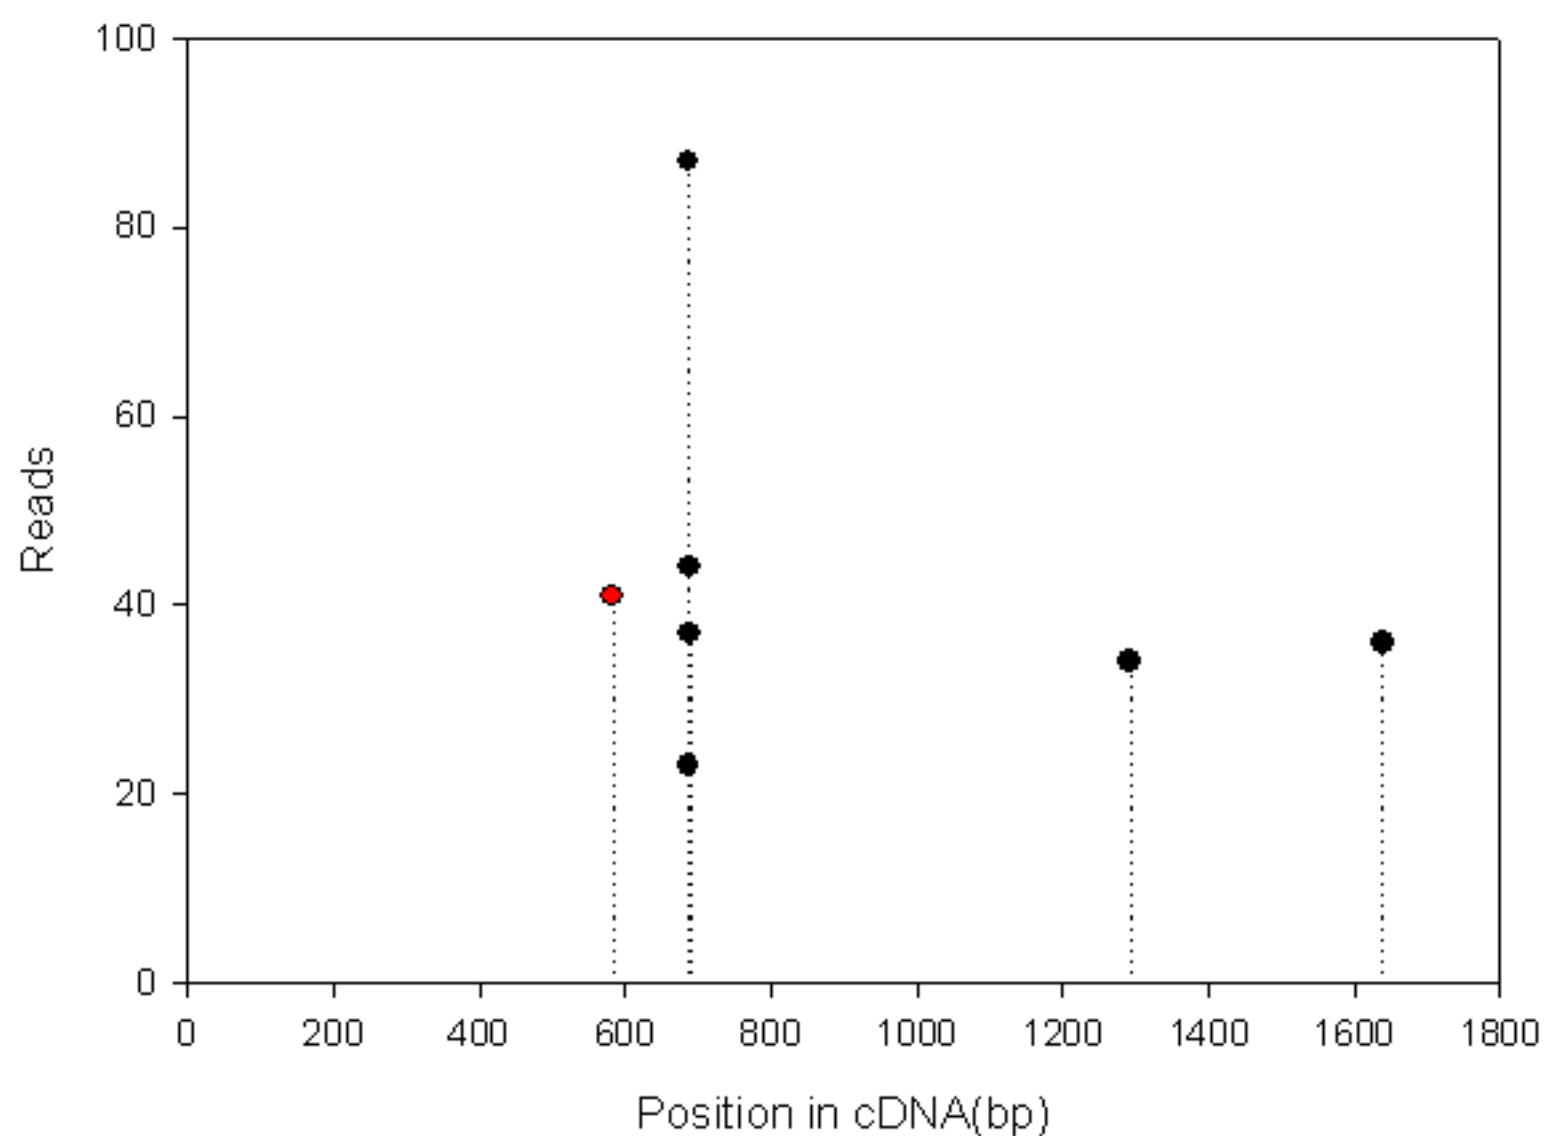

5' ACCGUUCAAGAAAGCCUGUGGAAUCA 3'

.....

3' --UCAAGUUCUUUCGG-CACCUUU-- 5'

Orange1.1t03122.1

Csi-miR396d.1

Csi-miR396d.2, target=Cs2g09620.1 gene=Cs2g09620  
 Category:3  
 Score=5  
 Cleavage Site=3511

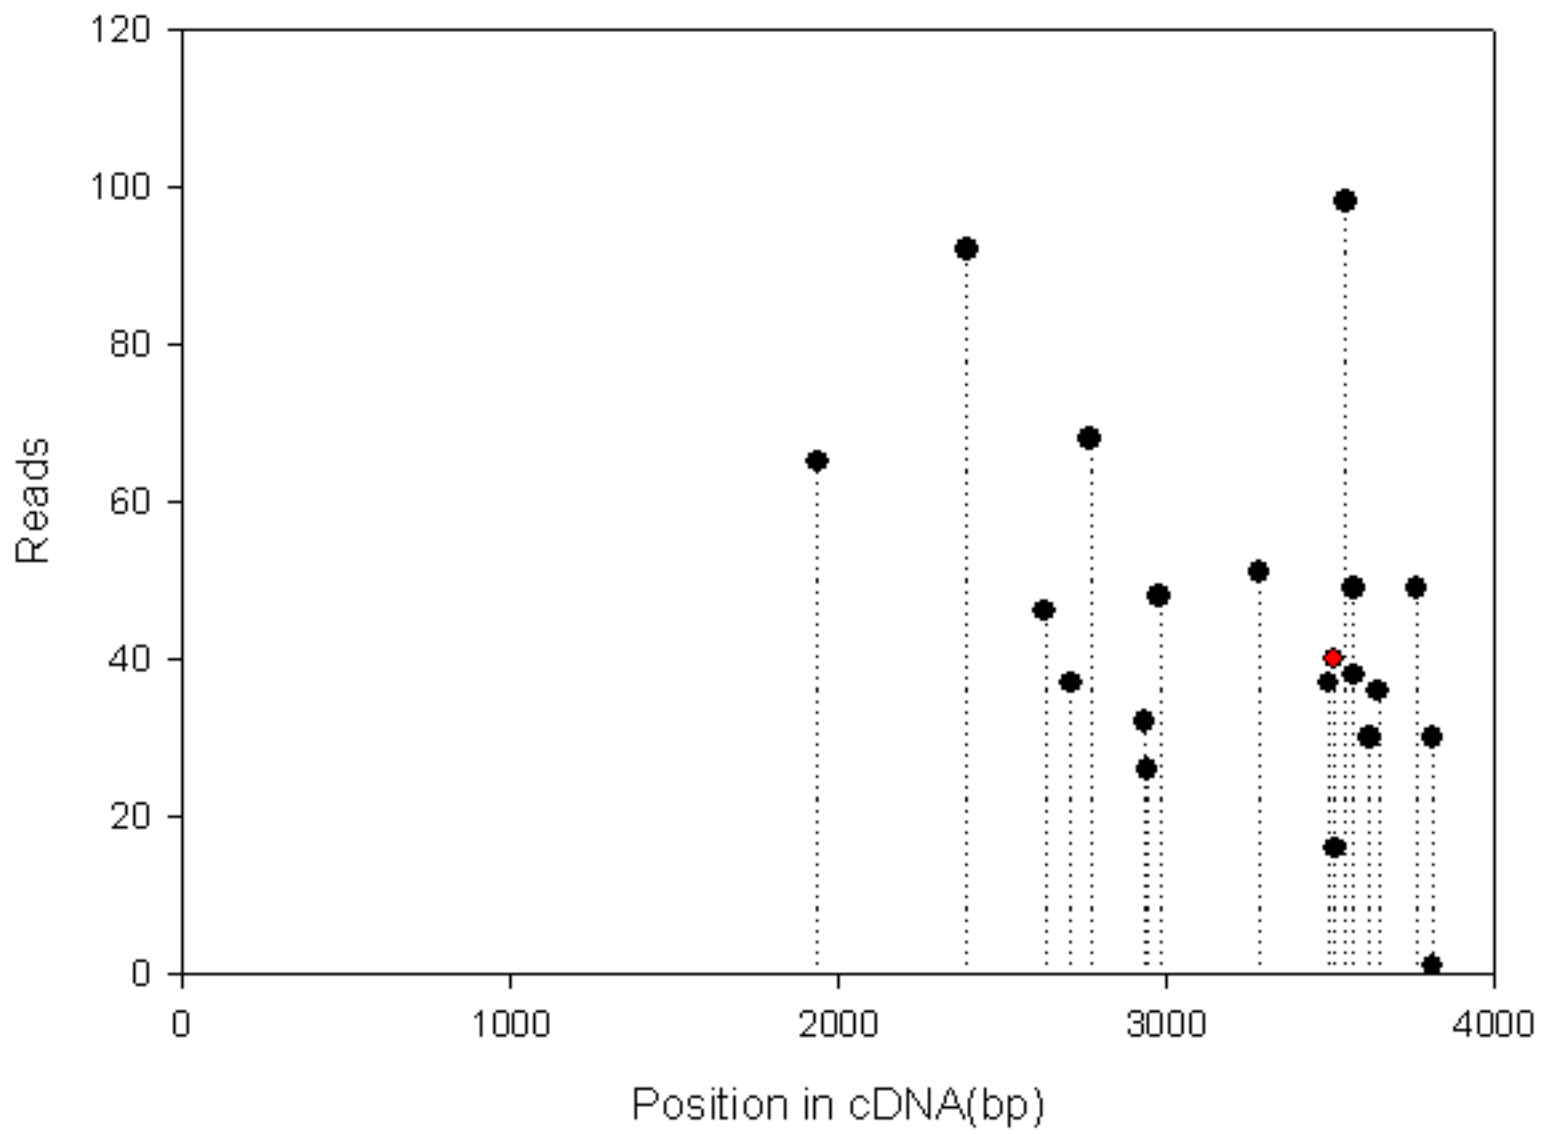

5' CCAAGUAC-UGAAAUCCGUGGAACUUU 3'  
 :::: : :::: :::::  
 3' --UUCAAGUUCUUUCGGCACCUU---- 5'

Cs2g09620.1

Csi-miR396d.2

Csi-miR396d.2, target=Cs3g23180.1 gene=Cs3g23180  
 Category: 3  
 Score=4  
 Cleavage Site=625



```

5' AAAGAUCAAGGAAGCUGUGGGAGUUG 3' Cs3g23180.1
   ::::::::::::::::::::
3' -UUCAAGUUCUUUCGGCACCUU---- 5' Csi-miR396d.2
  
```

Csi-miR396d.2, target=Cs5g01380.1 gene=Cs5g01380  
 Category:1  
 Score=4  
 Cleavage Site=1181



```

5' CCGUUCAAGAAAGCCUGUGGAAUUA 3'      Cs5g01380.1
   : : : : : : : : : : : : : : : :
3' -UUCAAGUUCUUUCGG-CACCUU--- 5'      Csi-miR396d.2
  
```

Csi-miR396d.2, target=Cs5g19200.1 gene=Cs5g19200  
 Category:2  
 Score=3.5  
 Cleavage Site=201



```

5' AAUGUUUAAGAAAGCAGUGGAAGCAA 3'      Cs5g19200.1
   : : : : : : : : : : : : : : : :
3' -UUCAAGUUCUUUCGGCACCUCU----- 5'    Csi-miR396d.2
  
```

Csi-miR396d.2, target=Cs7g15220.1 gene=Cs7g15220

Category:1

Score=4

Cleavage Site=377

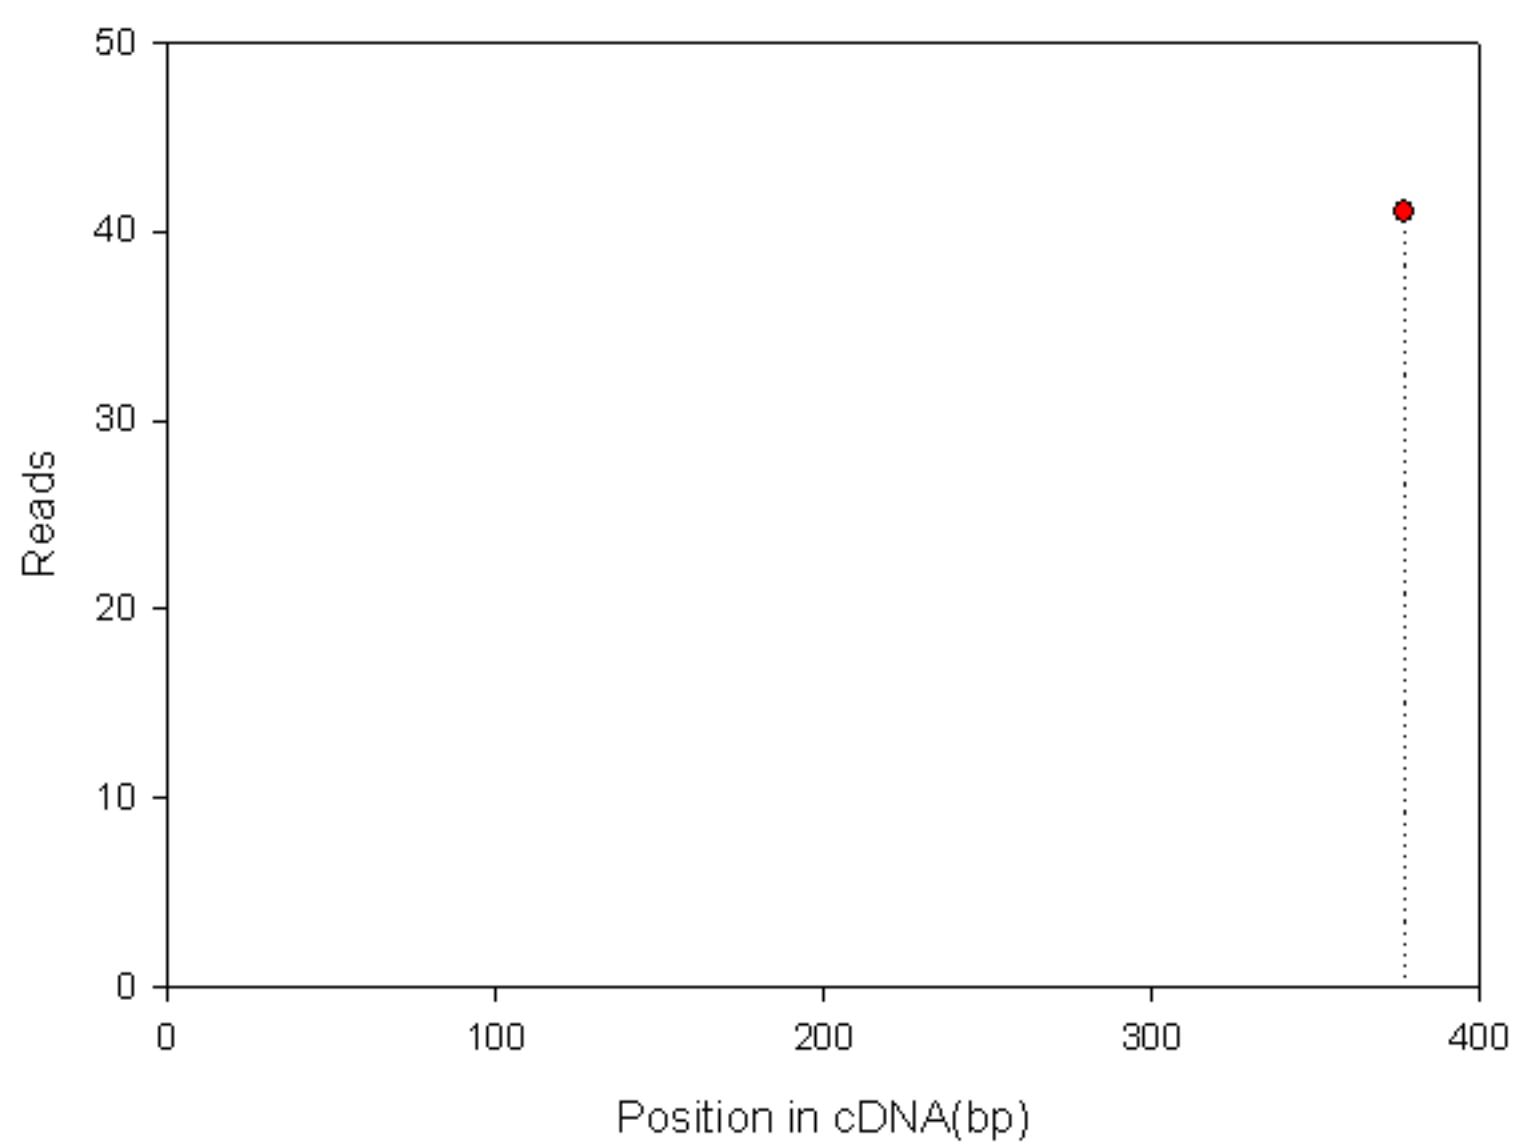

5' ACCGUUCAAGAAAGCCUGUGGAAUCA 3'

Cs7g15220.1

:::::::::::::::::: :::::

3' -UUCAAGUUCUUUCGG-CACCUU--- 5'

Csi-miR396d.2



Csi-miR396d.2, target=Cs8g17370.1 gene=Cs8g17370  
 Category:3  
 Score=4  
 Cleavage Site=137



```

5' GCGAGGAUUACAAGAAGGCCGUGGAG 3'
   . : : : : : : : : : : : : : .
3' ----UUCAAGUUCUUUCGGCACCUU 5'
  
```

Cs8g17370.1

Csi-miR396d.2

Csi-miR396d.2, target=Cs9g19220.1 gene=Cs9g19220  
 Category:3  
 Score=5  
 Cleavage Site=1829



5' GGUGAGAGCAAGAAGGCUGUGGAGAA 3'

Cs9g19220.1

. . . : : : : : . . . . .

3' ---UUCAAGUUCUUUCGGCACCUU-- 5'

Csi-miR396d.2

Csi-miR396d.2, target=Orange1.1t02555.1 gene=Orange1.1t02555  
Category:1  
Score=3  
Cleavage Site=920



```
5' CACGUUCAAGAAAGCCUGUGGAACUU 3' Orange1.1t02555.1
   : : : : : : : : : : : : : : : :
3' -UUCAAGUUCUUUCGG-CACCUU--- 5' Csi-miR396d.2
```

Csi-miR396d.2, target=Orange1.1t03122.1 gene=Orange1.1t03122  
 Category:2  
 Score=4  
 Cleavage Site=583

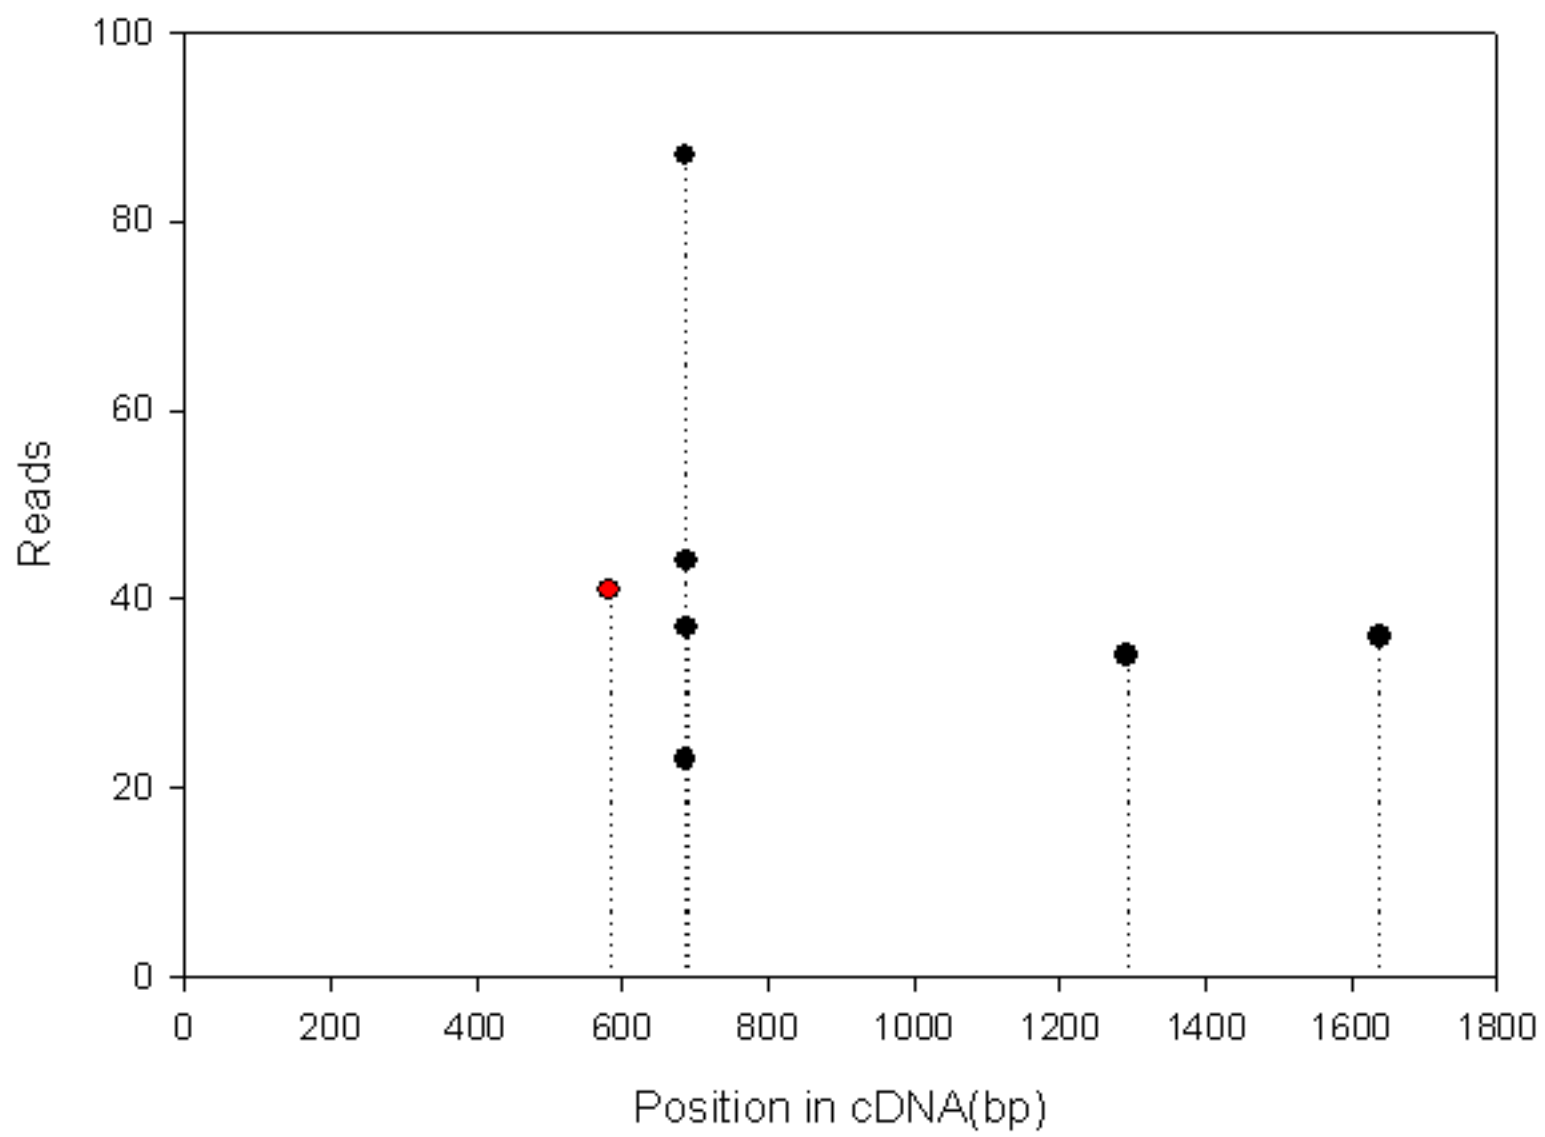

5' ACCGUUCAAGAAAGCCUGUGGAAUCA 3'  
 ::::::::::::::::::::  
 3' -UUCAAGUUCUUUCGG-CACCUU--- 5'

Orange1.1t03122.1  
 Csi-miR396d.2

Csi-miR396d.3, target=Cs1g15720.1 gene=Cs1g15720  
 Category:2  
 Score=5  
 Cleavage Site=1610

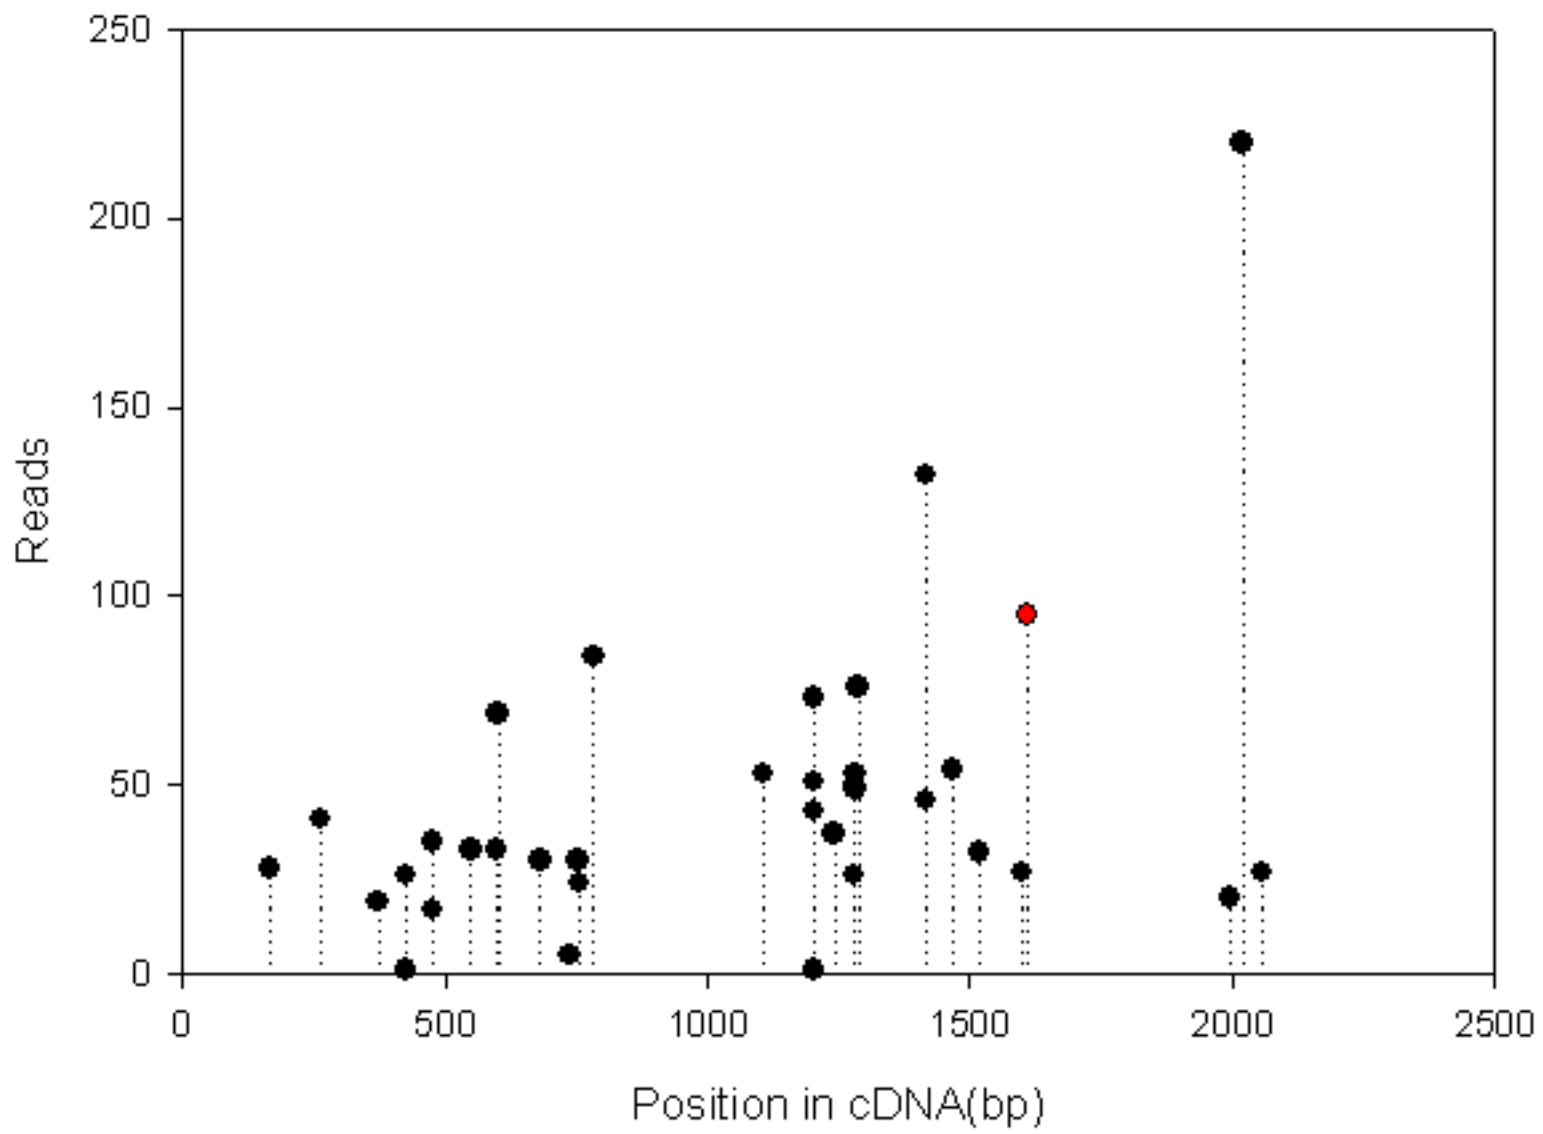

5' CAACAUUCAA-AAAGCCGUGGGCUCA 3'

Cs1g15720.1

.....

3' -----CAAGUUCUUUCGGCACCUCU--- 5'

Csi-miR396d.3

Csi-miR396d.3, target=Cs3g23180.1 gene=Cs3g23180  
 Category: 3  
 Score=4  
 Cleavage Site=625



|    |                                 |    |               |
|----|---------------------------------|----|---------------|
| 5' | AAAGAUCAAGGAAGCUGUGGGAGUUG      | 3' | Cs3g23180.1   |
|    | : : : : : . : : : : . : : : : . |    |               |
| 3' | ---CAAGUUCUUUCGGCACCUU---       | 5' | Csi-miR396d.3 |

Csi-miR396d.3, target=Cs4g12200.1 gene=Cs4g12200  
 Category:2  
 Score=4  
 Cleavage Site=228



```

5' GGUUCCUGAAAGCCG-GGAAUAUGCU 3'      Cs4g12200.1
   :   :   :   :   :   :   :   :
3' -CAAGUUCUUUCGGCACCU----- 5'      Csi-miR396d.3
  
```

Csi-miR396d.3, target=Cs5g01380.1 gene=Cs5g01380  
 Category:1  
 Score=2  
 Cleavage Site=1181



```

5' CCGUUCAAGAAAGCCUGUGGAAUUA 3'      Cs5g01380.1
   :::::::::::::::::::: :::::
3' ---CAAGUUCUUUCGG-CACCUU--- 5'      Csi-miR396d.3
  
```



Csi-miR396d.3, target=Cs5g07120.1 gene=Cs5g07120  
 Category:2  
 Score=4.5  
 Cleavage Site=1257

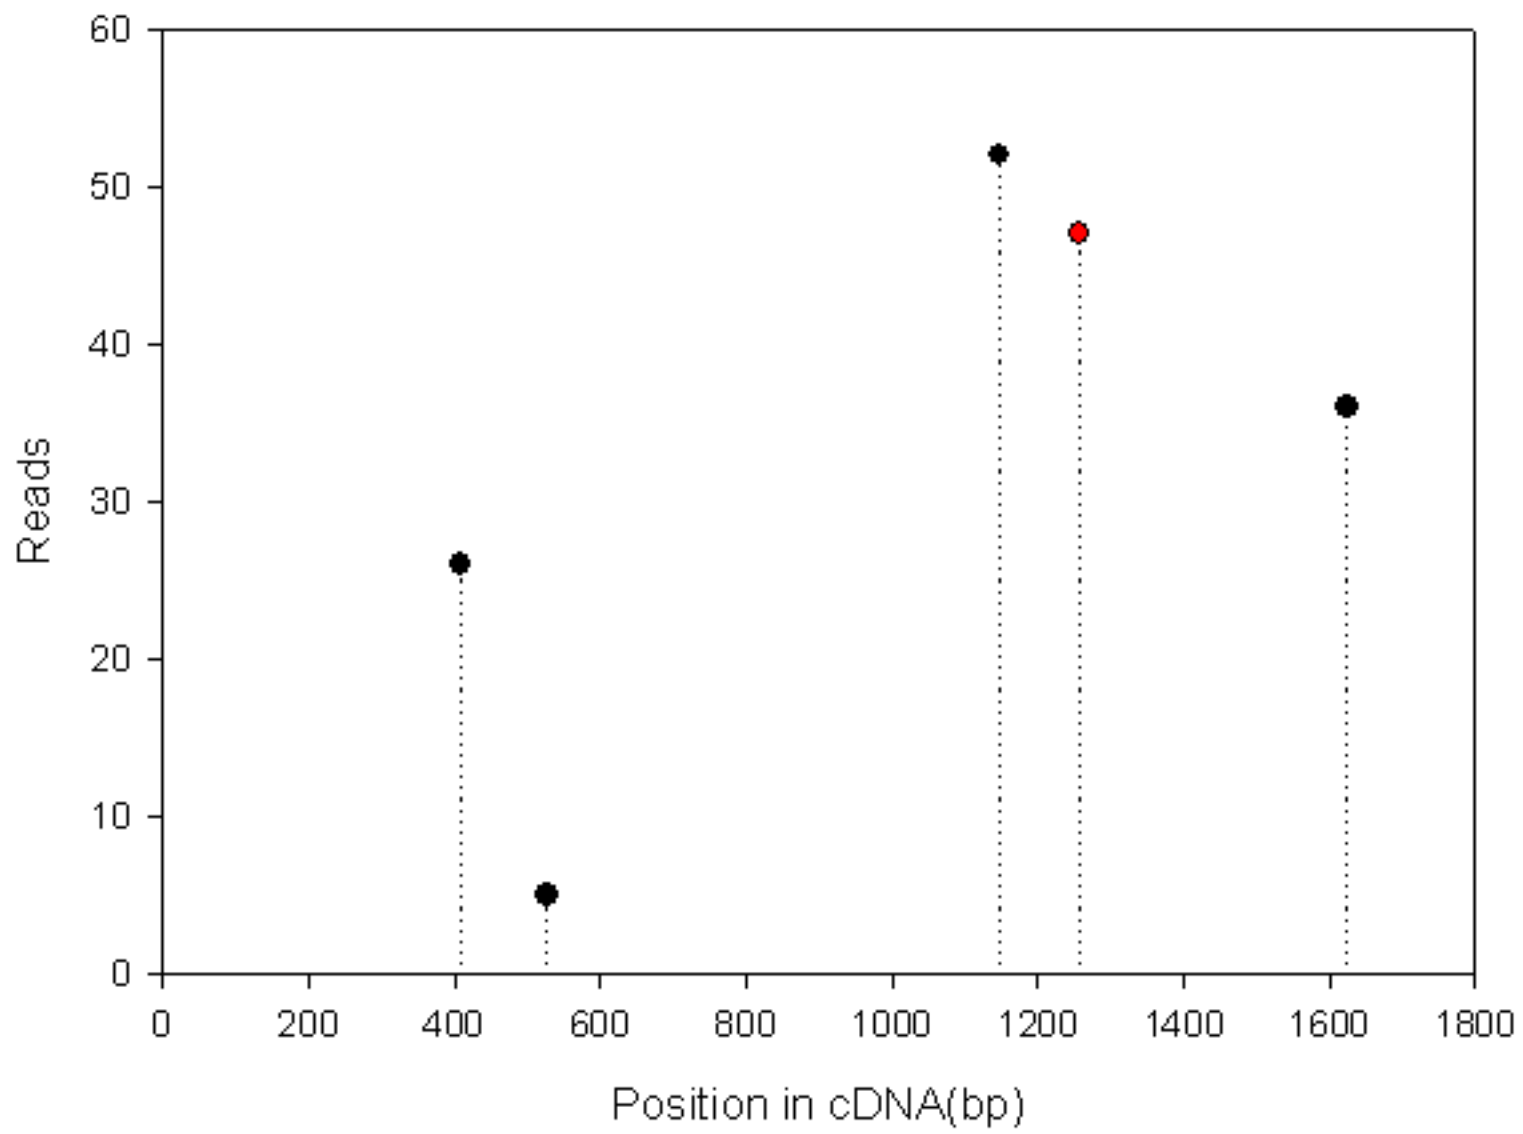

```

5' UGUUGGUAUGA-AAAGCCGUGGAGUCU 3'      Cs5g07120.1
      :: ..: :::::::::::::::
3' -----CAAGUUCUUUCGGCACC UU---- 5'      Csi-miR396d.3
  
```

Csi-miR396d.3, target=Cs5g19200.1 gene=Cs5g19200  
 Category:2  
 Score=2.5  
 Cleavage Site=201



5' AAUGUUUAAGAAAGCAGUGGAAGCAA 3'

Cs5g19200.1

.....

3' ---CAAGUUCUUUCGGCACCUU---- 5'

Csi-miR396d.3

Csi-miR396d.3, target=Cs7g12930.1 gene=Cs7g12930  
 Category:1  
 Score=4.5  
 Cleavage Site=1079



```

5' UAGUAUUAAGAAAGCUGAGGAAAAG 3'      Cs7g12930.1
   :: ::::::::::::::: ::::
3' --CA-AGUUCUUUCGGCACCUU----- 5'    Csi-miR396d.3
  
```

Csi-miR396d.3, target=Cs7g15220.1 gene=Cs7g15220  
Category:1  
Score=2  
Cleavage Site=377



```
5' ACCGUUCAAGAAAGCCUGUGGAAUCA 3'      Cs7g15220.1
   :::::::::::::::::::: ::::::
3' ---CAAGUUCUUUCGG-CACCUU--- 5'      Csi-miR396d.3
```

Csi-miR396d.3, target=Cs8g15450.1 gene=Cs8g15450  
 Category:3  
 Score=4.5  
 Cleavage Site=219

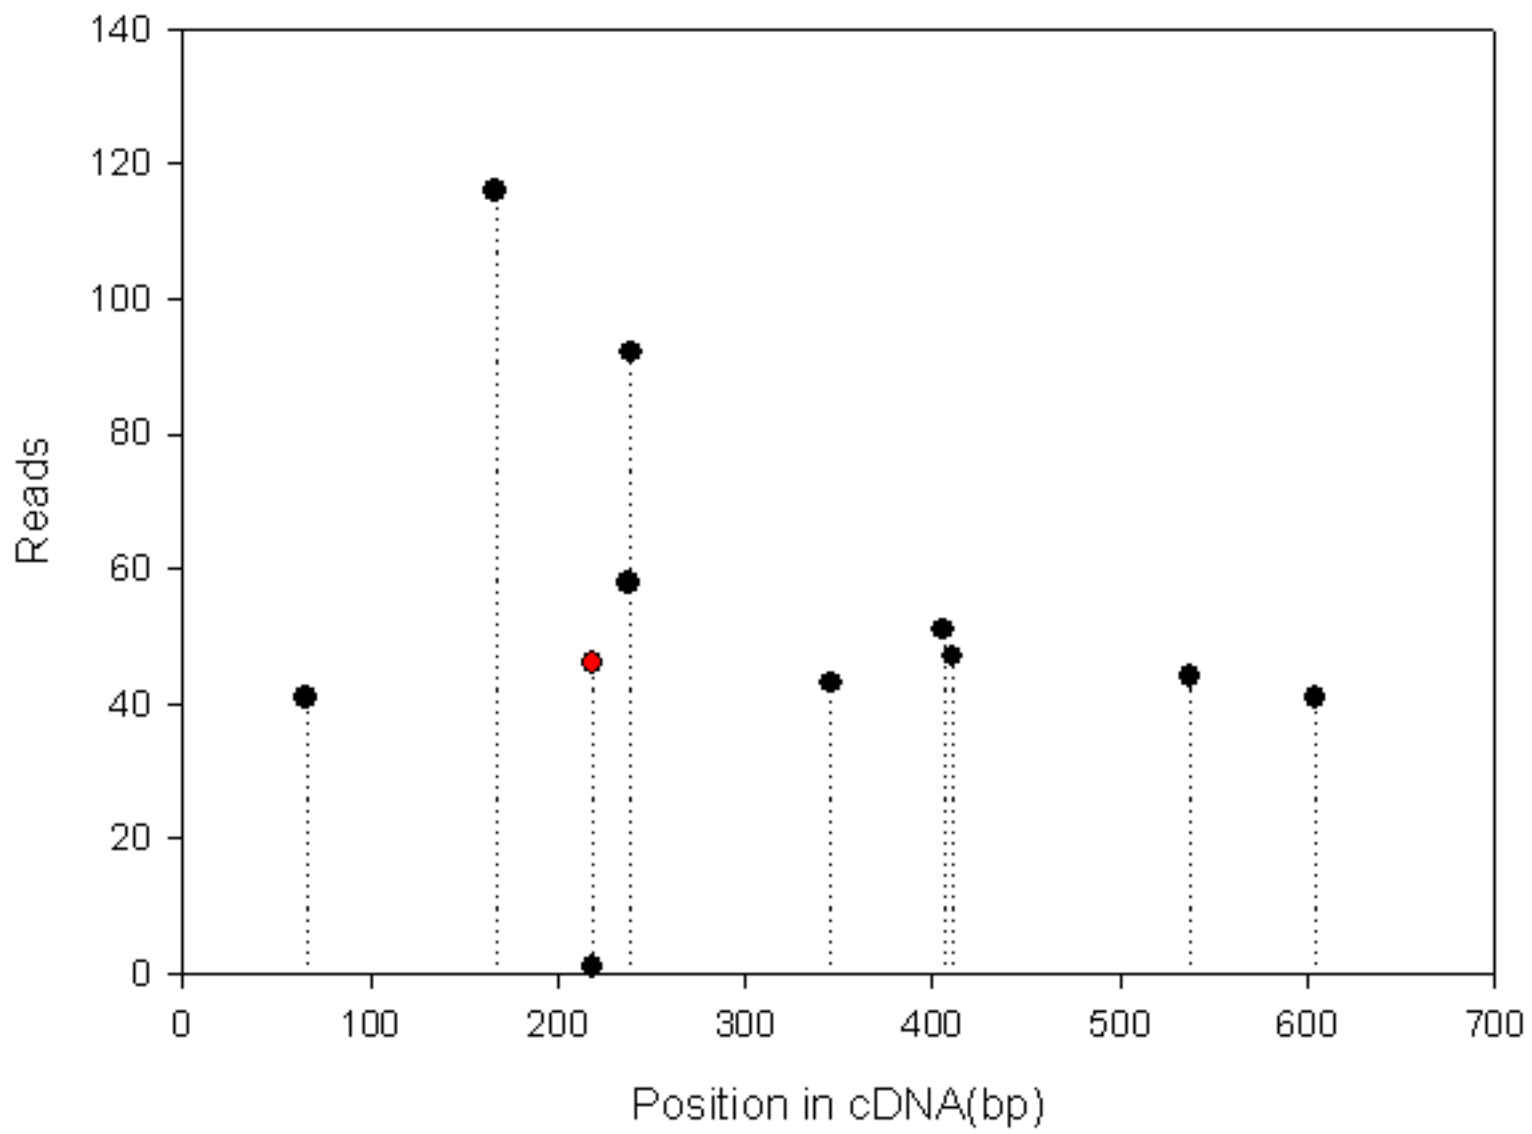

```

5' GUUCAGCAGAGCCGUGGAUGGGUUCA 3'          Cs8g15450.1
   .....
3' CAAGUUCUUUCGGCACCU----- 5'          Csi-miR396d.3

```

Csi-miR396d.3, target=Cs8g17370.1 gene=Cs8g17370  
 Category:3  
 Score=3.5  
 Cleavage Site=137



```

5' GCGAGGAUUACAAGAAGGCCGUGGAG 3'      Cs8g17370.1
      : : : : : : : : : : : : : :
3' -----CAAGUUCUUUCGGCACCUU 5'      Csi-miR396d.3
  
```

Csi-miR396d.3, target=Cs9g14020.1 gene=Cs9g14020  
 Category:3  
 Score=5  
 Cleavage Site=639

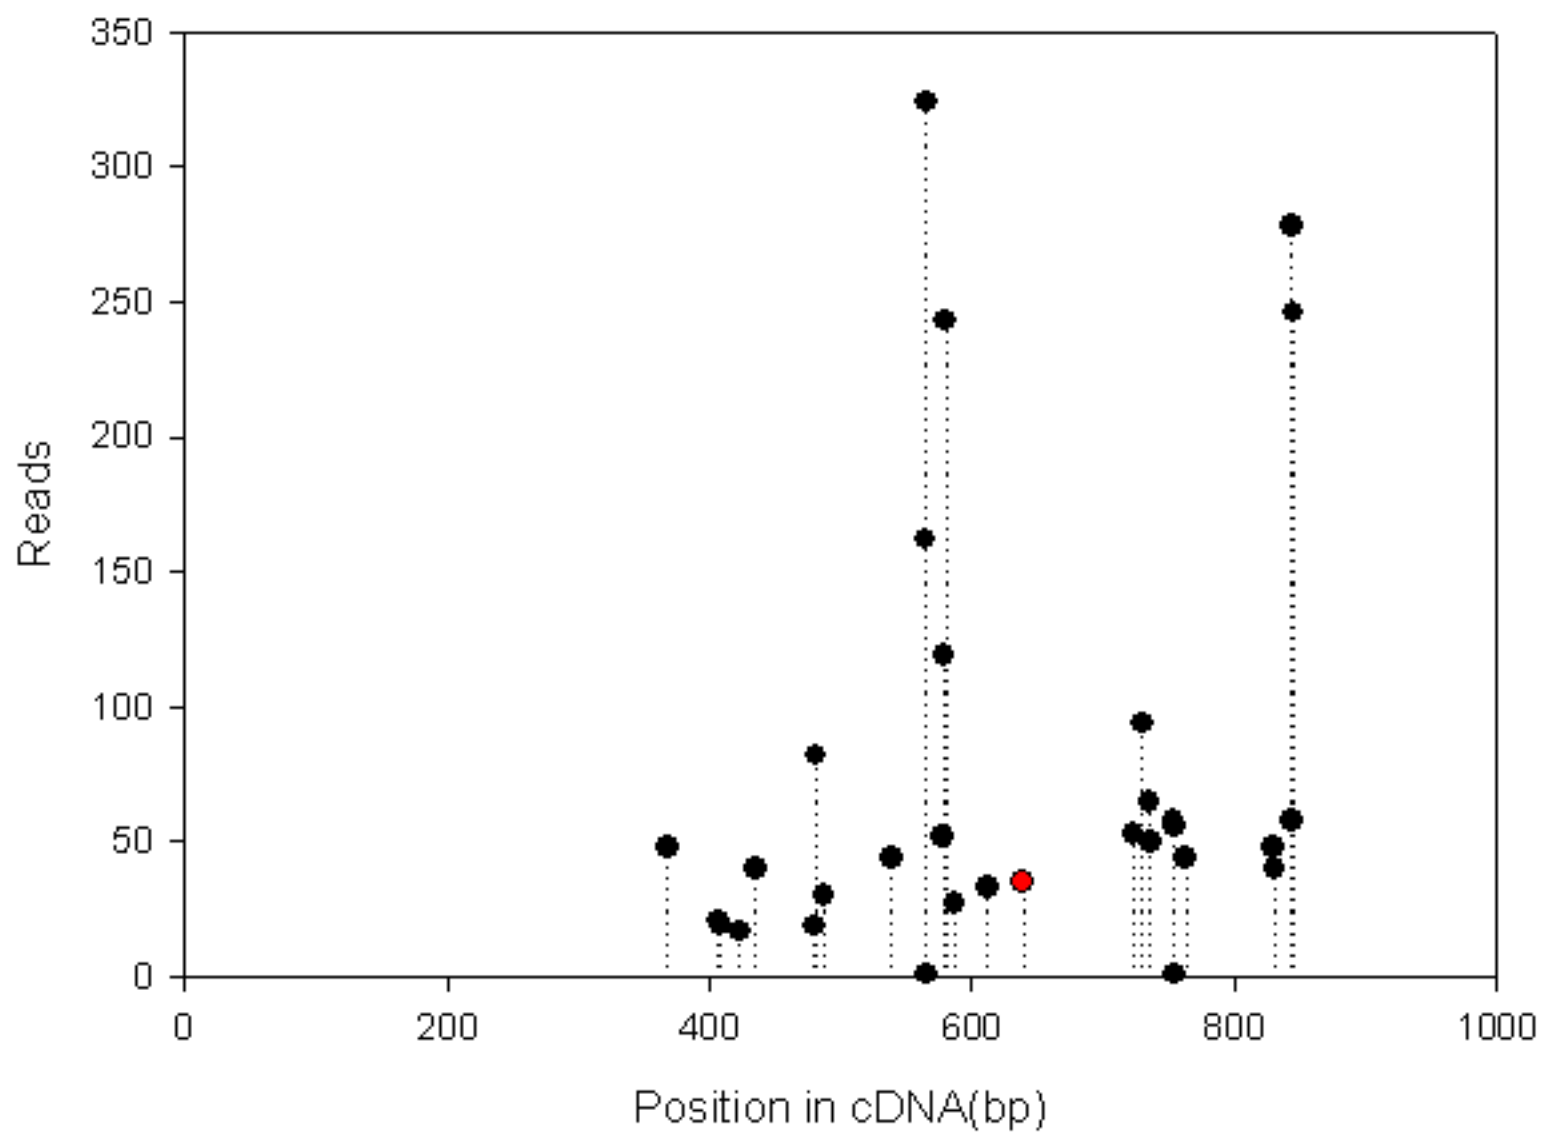

|                                   |               |
|-----------------------------------|---------------|
| 5' GGCCCAUC-AGAAAGCCCUGGAACGCC 3' | Cs9g14020.1   |
| : : : : : : : : : : : :           |               |
| 3' ----CAAGUUCUUUCGGCACCUU---- 5' | Csi-miR396d.3 |

Csi-miR396d.3, target=Cs9g19220.1 gene=Cs9g19220  
 Category:3  
 Score=4.5  
 Cleavage Site=1829



```

5' GGUGAGAGCAAGAAGGCUGUGGAGAA 3'      Cs9g19220.1
   :  :  :  :  :  :  :  :  :  :  :
3' -----CAAGUUCUUUCGGCACCUU-- 5'      Csi-miR396d.3

```



Csi-miR396d.3, target=Orange1.1t02254.1 gene=Orange1.1t02254  
 Category:3  
 Score=3.5  
 Cleavage Site=1371



```

5' GUUGCUGAAGAAAGCUGUGGAGGAUC 3'      Orange1.1t02254.1
   : : : : : : : : : : : : : : :
3' ---CAAGUUCUUUCGGCACCUU----- 5'    Csi-miR396d.3
  
```

Csi-miR396d.3, target=Orange1.1t02555.1 gene=Orange1.1t02555  
Category:1  
Score=2  
Cleavage Site=920

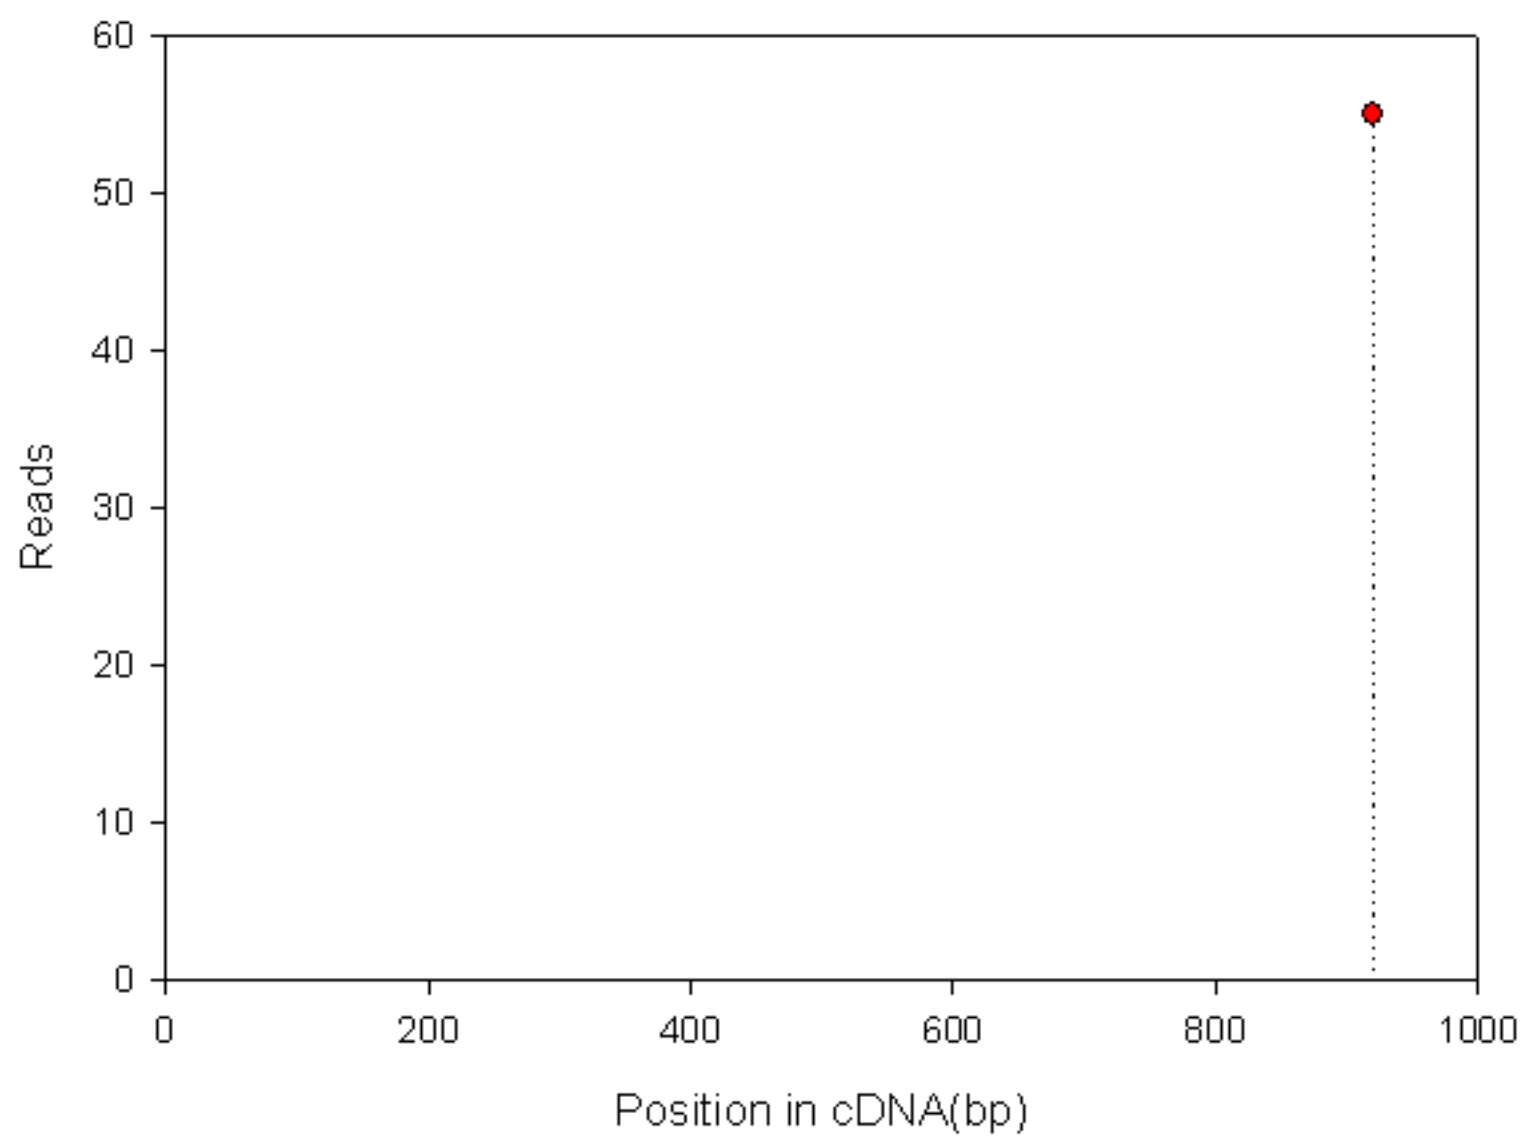

```
5' CACGUUCAAGAAAGCCUGUGGAACUU 3'      Orange1.1t02555.1
      ::::::::::::::: :::::
3' ---CAAGUUCUUUCGG-CACCUU--- 5'      Csi-miR396d.3
```

Csi-miR396d.3, target=Orange1.1t03122.1 gene=Orange1.1t03122  
 Category:2  
 Score=2  
 Cleavage Site=583



5' ACCGUUCAAGAAAGCCUGUGGAAUCA 3'  
 :::::::::::::: :::::  
 3' ---CAAGUUCUUUCGG-CACCUU--- 5'

Orange1.1t03122.1  
 csi-miR396d.3

Csi-miR396d.4, target=Cs1g15720.1 gene=Cs1g15720  
 Category:2  
 Score=4  
 Cleavage Site=1610

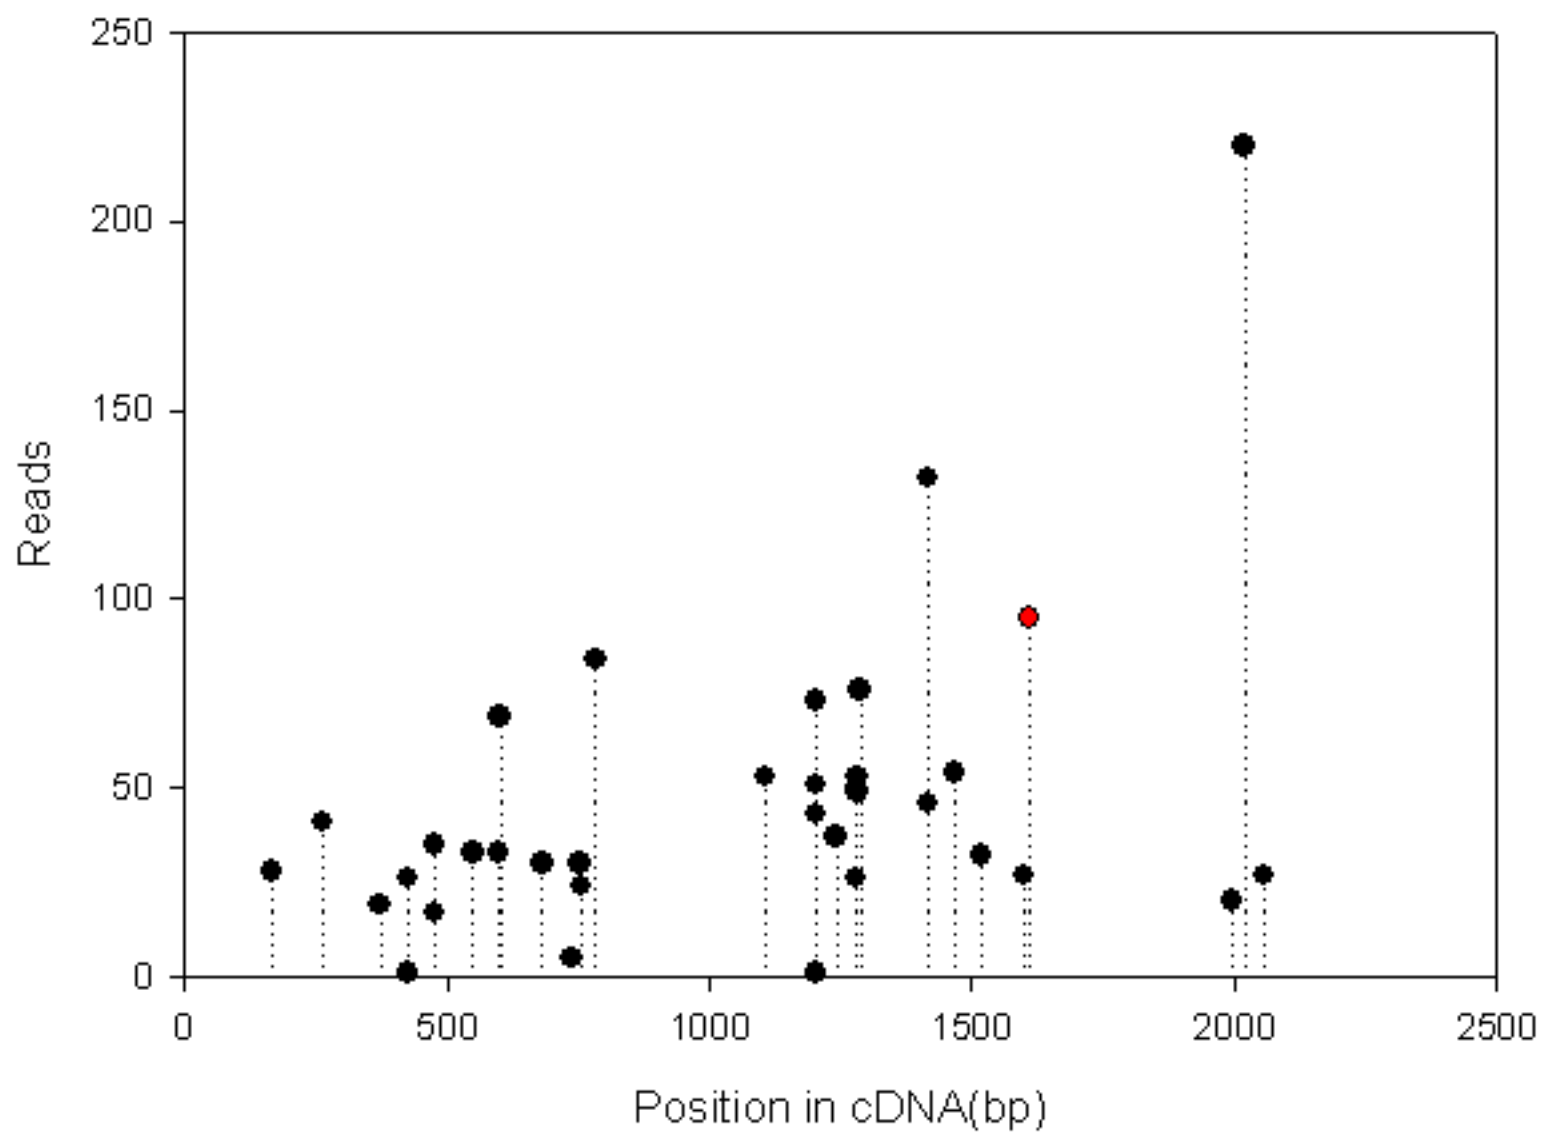

|    |                               |    |               |
|----|-------------------------------|----|---------------|
| 5' | CAACAUUCAA-AAAGCCGUGGGCUCA    | 3' | Cs1g15720.1   |
|    | : : : : : : : : : : : : : : . |    |               |
| 3' | -----AAGUUCUUUCGGCACCUU---    | 5' | Csi-miR396d.4 |

Csi-miR396d.4, target=Cs1g16550.1 gene=Cs1g16550  
 Category:3  
 Score=5  
 Cleavage Site=418

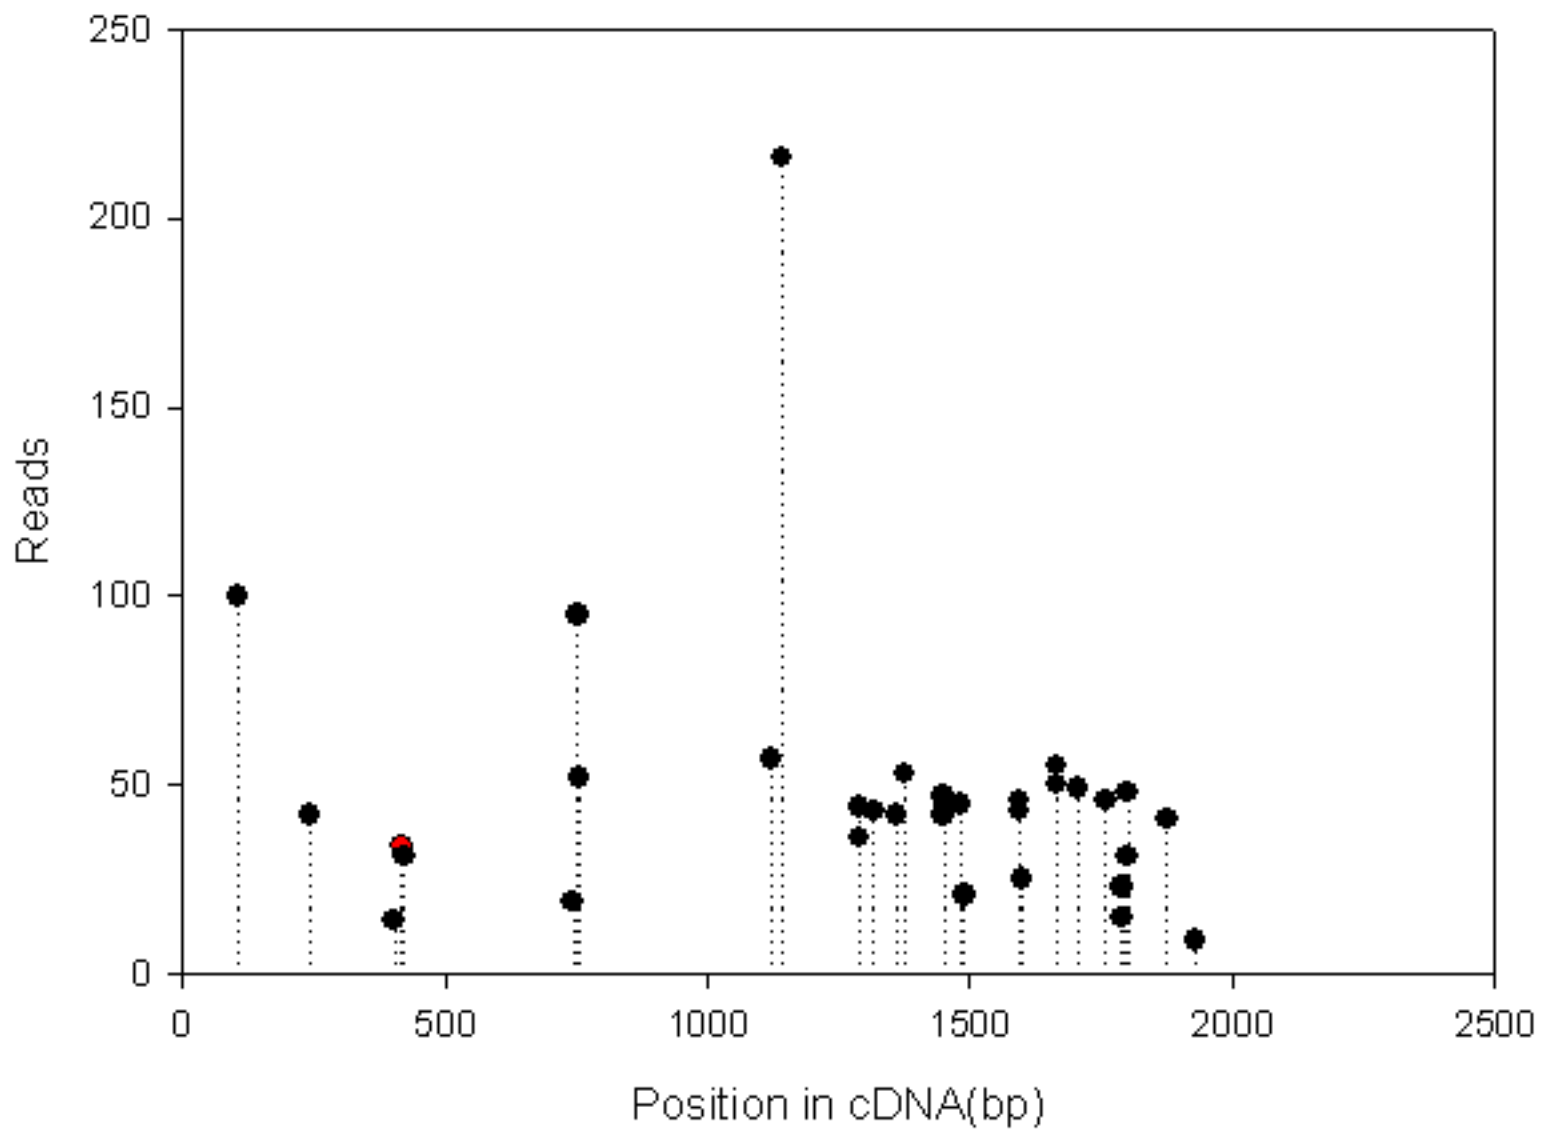

5' ACAUCACAACAACAGCCGUGGAACAC 3'  
 ::: :: :  
 3' ----AAGUUCUU-UCGGCACCUU---- 5'

Cs1g16550.1

Csi-miR396d.4

Csi-miR396d.4, target=Cs3g07260.1 gene=Cs3g07260  
 Category:3  
 Score=4.5  
 Cleavage Site=2420

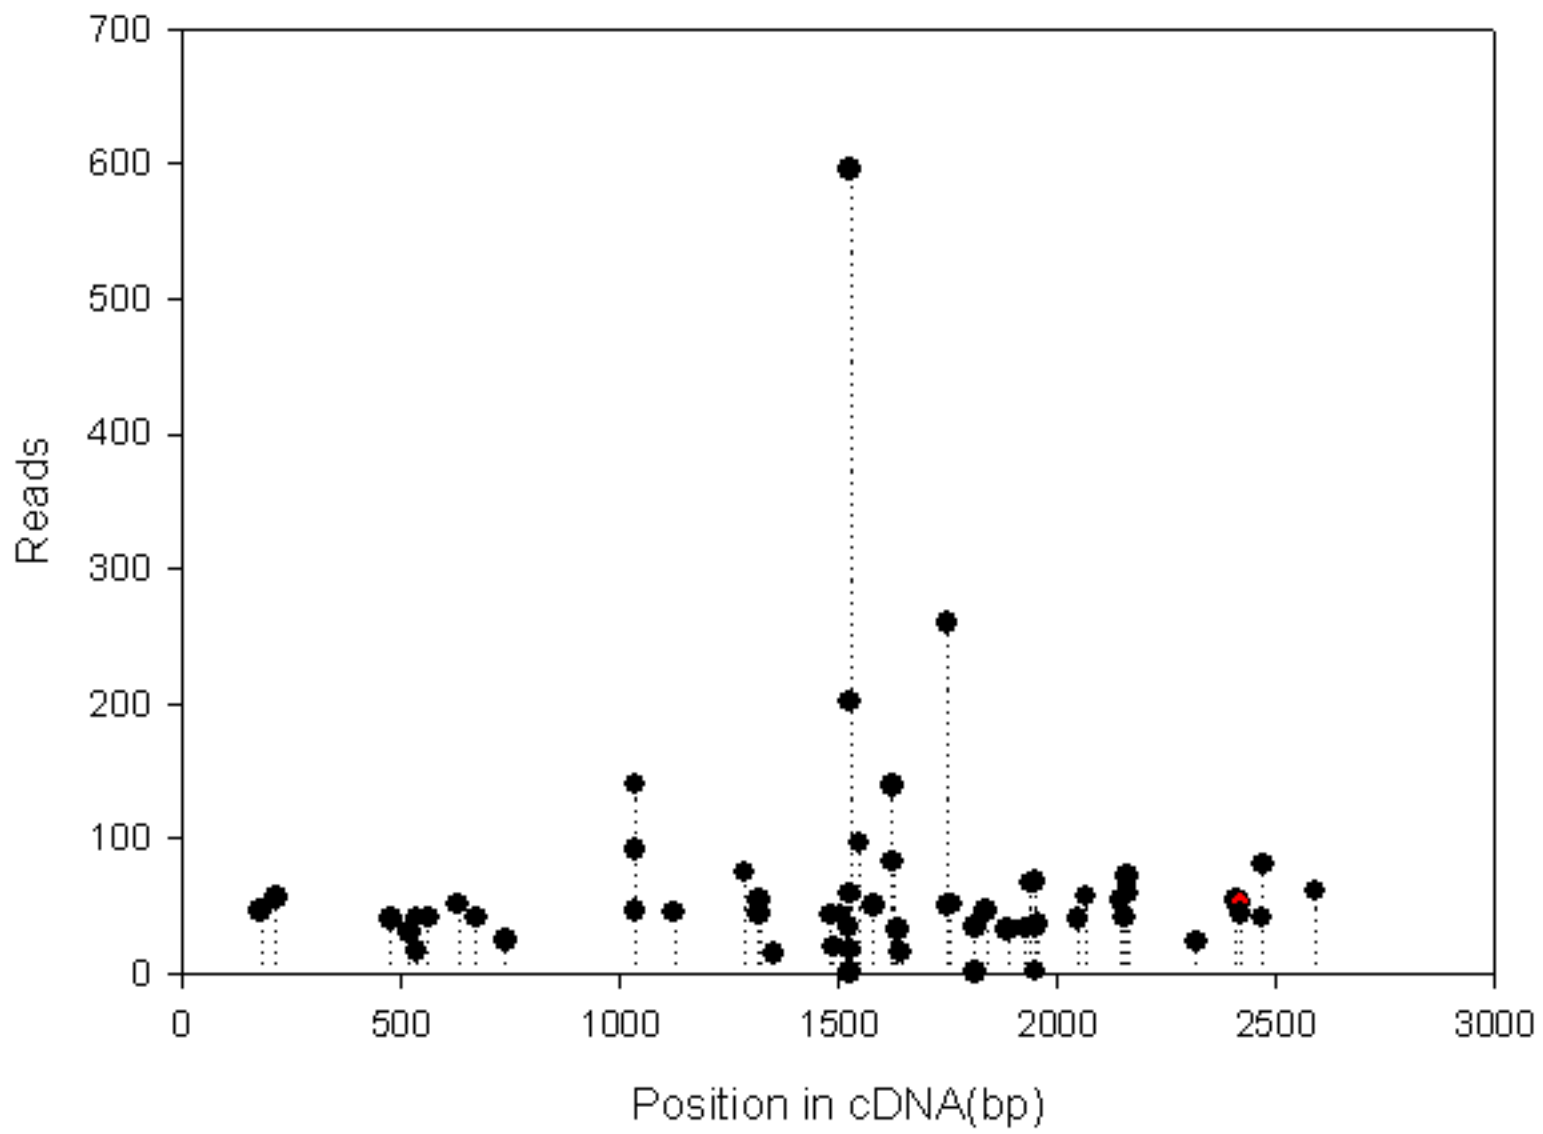

```

5' AUUCCAGGAAAGUUGUGGGAUAAAUA 3'      Cs3g07260.1
   : : : : : : : : : : : : : : : :
3' --AAGUUCUUUCGGCACCUU----- 5'      Csi-miR396d.4

```

Csi-miR396d.4, target=Cs3g23180.1 gene=Cs3g23180  
 Category: 3  
 Score=4  
 Cleavage Site=625



```

5' AAAGAUCAAGGAAGCUGUGGGAGUUG 3'      Cs3g23180.1
      ::::::::::::::::::::
3' ----AAGUUCUUUCGGCACCUU---- 5'      Csi-miR396d.4
  
```

Csi-miR396d.4, target=Cs4g12200.1 gene=Cs4g12200  
 Category:2  
 Score=4  
 Cleavage Site=228



```

5' GGUUCCUGAAAGCCG-GGAAAUAUGCU 3'      Cs4g12200.1
   :::  :::::::::::  ::::
3' --AAGUUCUUUCGGCACCUU----- 5'      Csi-miR396d.4
  
```



Csi-miR396d.4, target=Cs4g18150.1 gene=Cs4g18150  
 Category:3  
 Score=5  
 Cleavage Site=506

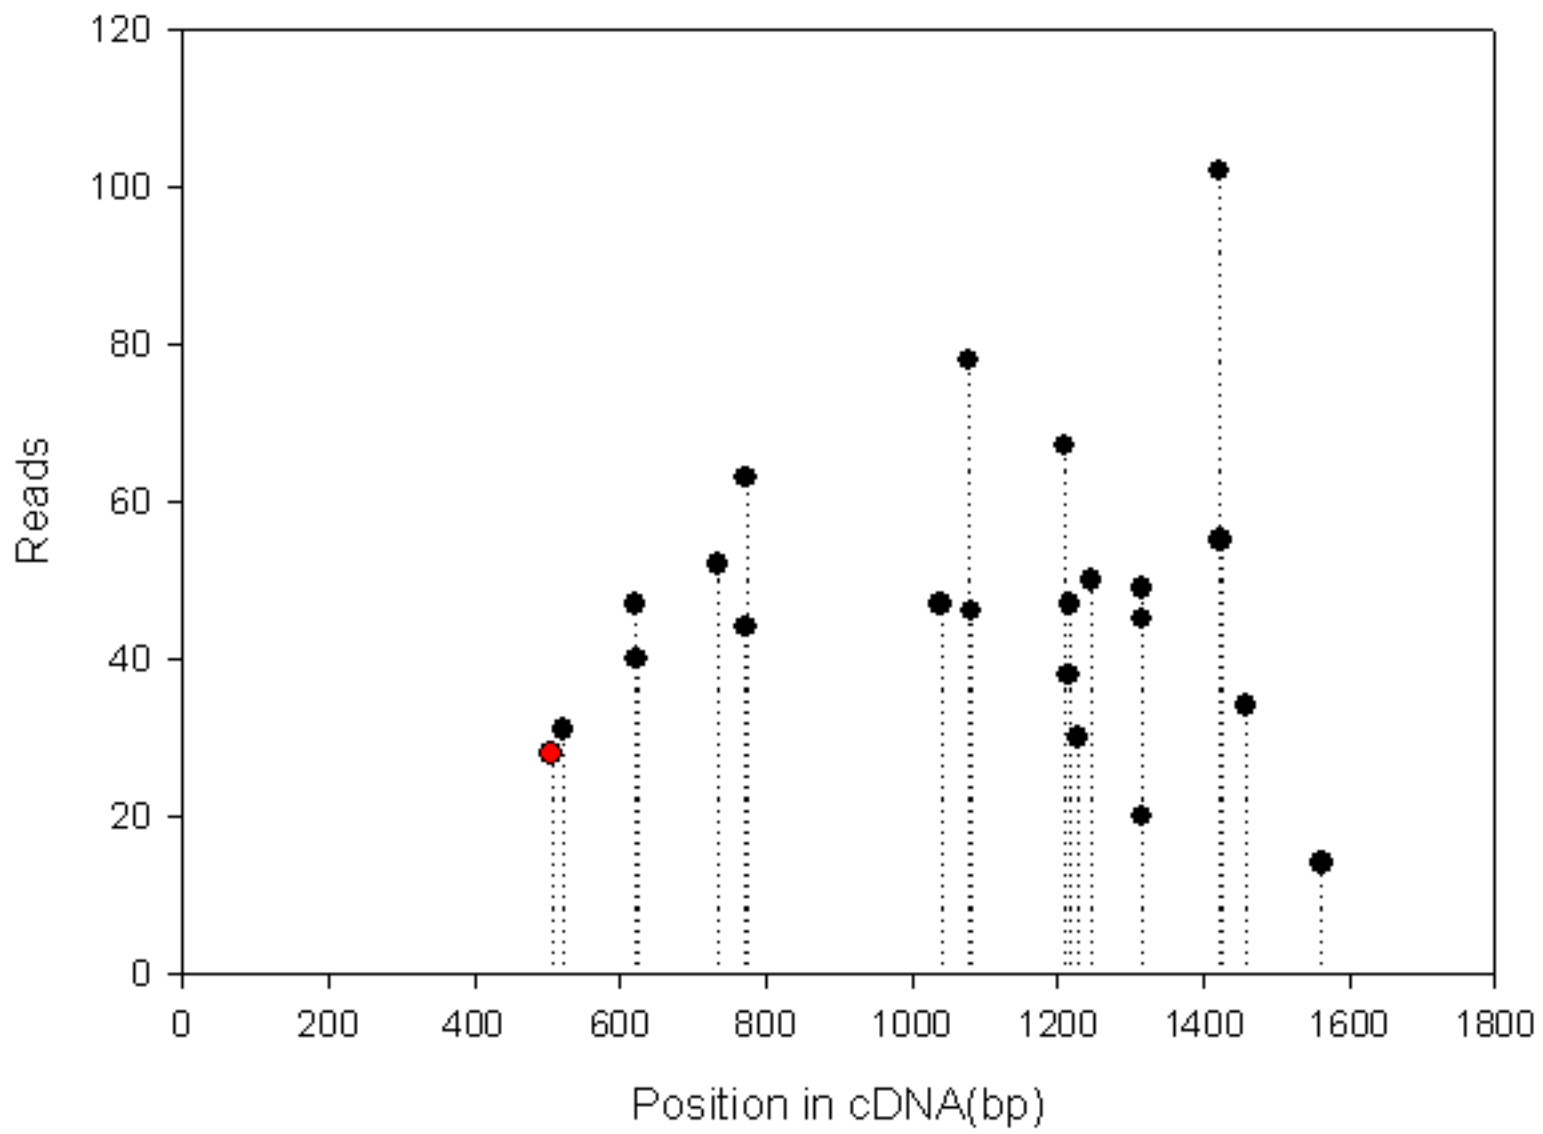

```

5' UUGUCUUGAAAGCCGAGGAAUUCUC 3'      Cs4g18150.1
   ::  :::::  ::::
3' --AAGUUCUUUCGGCACCUU----- 5'      Csi-miR396d.4

```

Csi-miR396d.4, target=Cs5g01380.1 gene=Cs5g01380  
 Category:1  
 Score=2  
 Cleavage Site=1181



```

5' CCGUUCAAGAAAGCCUGUGGAAUUA 3'      Cs5g01380.1
   :::::::::::::: :::::
3' ----AAGUUCUUUCGG-CACCUU---- 5'      Csi-miR396d.4
  
```

Csi-miR396d.4, target=Cs5g07120.1 gene=Cs5g07120  
 Category:2  
 Score=4.5  
 Cleavage Site=1257



```

5' UGUUGGUAUGA-AAAGCCGUGGAGUCU 3'      Cs5g07120.1
      : ..: ::::::::::::::
3' -----AAGUUCUUUCGGCACCUU----- 5'    Csi-miR396d.4
  
```

Csi-miR396d.4, target=Cs5g19200.1 gene=Cs5g19200  
 Category:2  
 Score=2.5  
 Cleavage Site=201

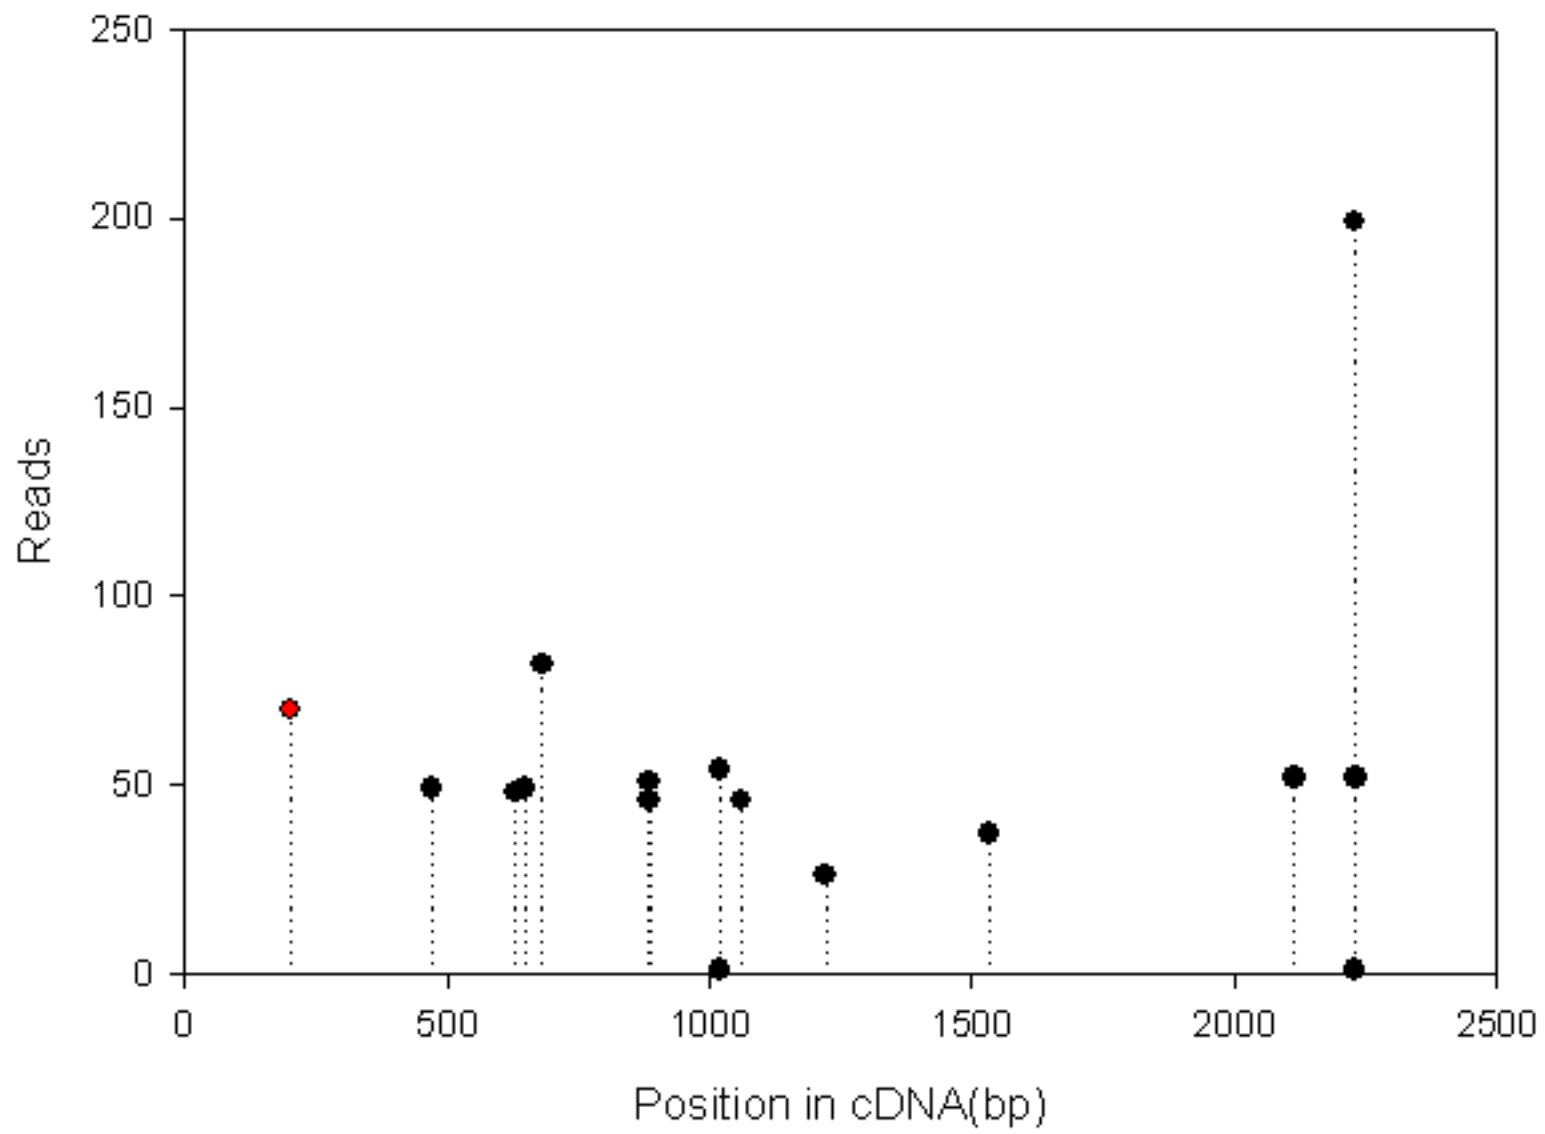

5' AAUGUUUAAGAAAGCAGUGGAAGCAA 3'

Cs5g19200.1

.....

3' ----AAGUUCUUUCGGCACCUU---- 5'

Csi-miR396d.4

Csi-miR396d.4, target=Cs6g04030.1 gene=Cs6g04030  
 Category:3  
 Score=5  
 Cleavage Site=857

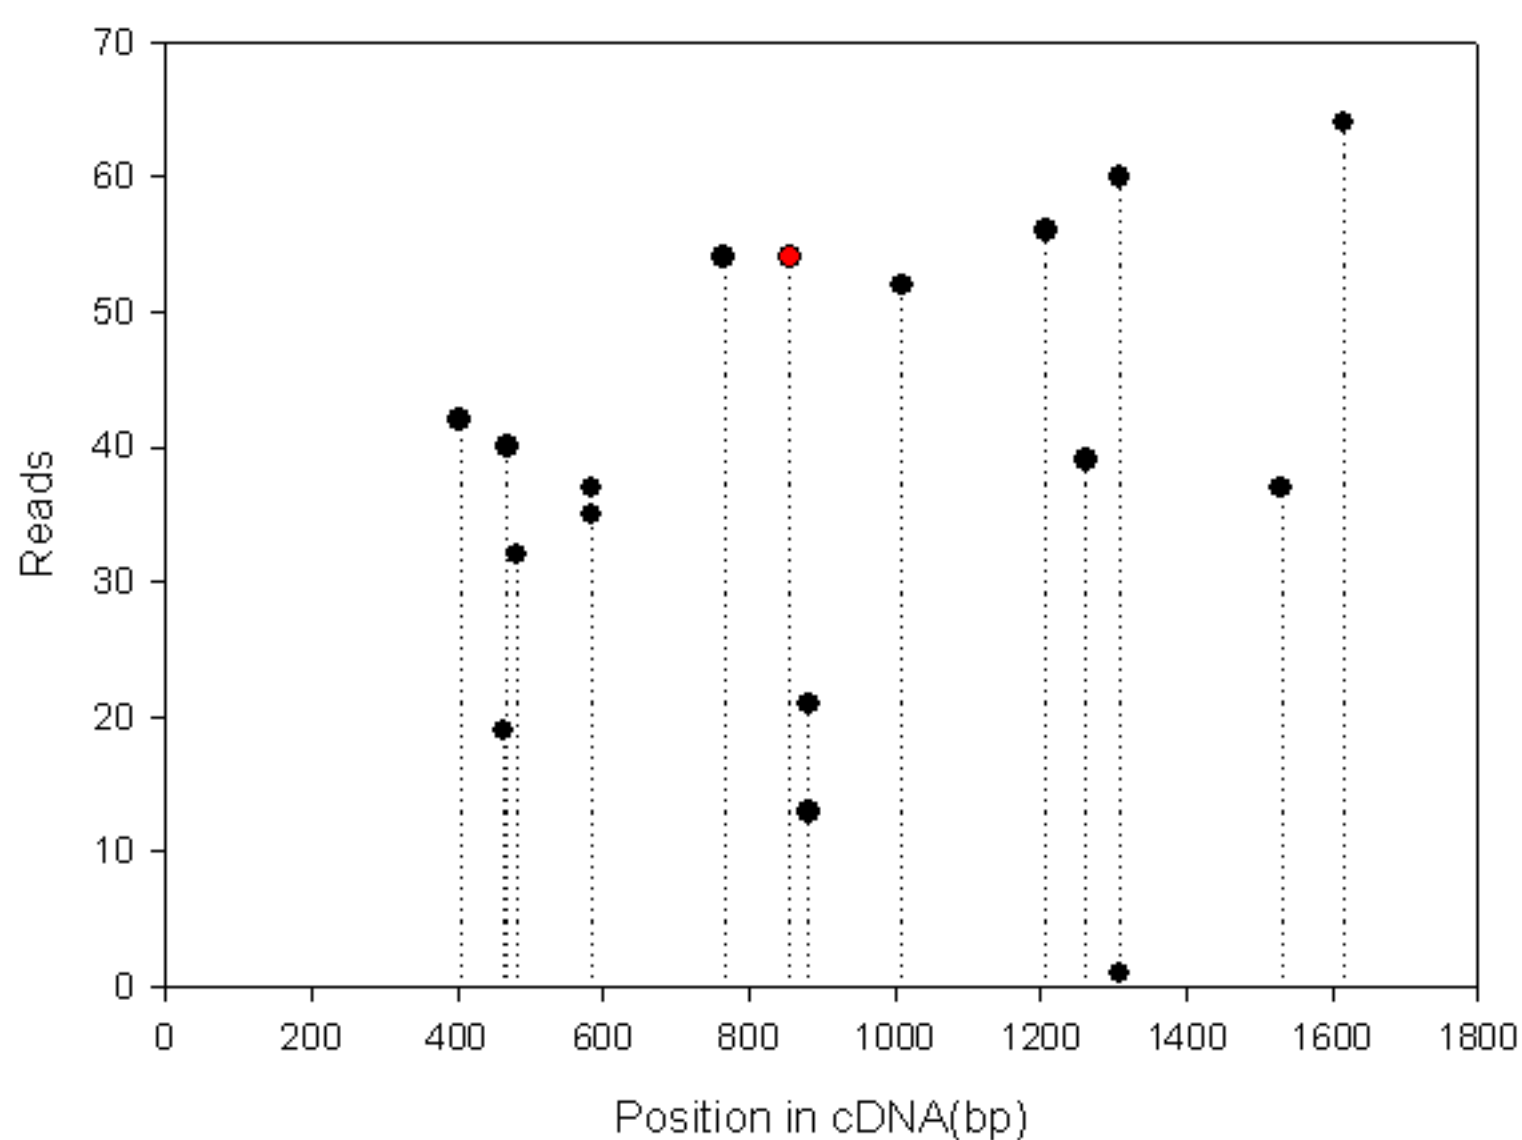

```

5'  GUAAAUACUUUUUAG-AAGCUGUGGAG  3'      Cs6g04030.1
      : : : : : : : : : : : : : :
3'  -----AAGUUCUUUCGGCACCUU  5'      Csi-miR396d.4
  
```

Csi-miR396d.4, target=Cs6g06540.1 gene=Cs6g06540  
 Category:3  
 Score=5  
 Cleavage Site=526



```

5' AACUCCUUC-AGAAAGCUGAGGAUAA 3'      Cs6g06540.1
   ::: : : : : : : : : : : : :
3' -----AAGUUCUUUCGGCACCUU-- 5'      Csi-miR396d.4
  
```

Csi-miR396d.4, target=Cs6g06560.1 gene=Cs6g06560  
 Category:3  
 Score=3.5  
 Cleavage Site=1538

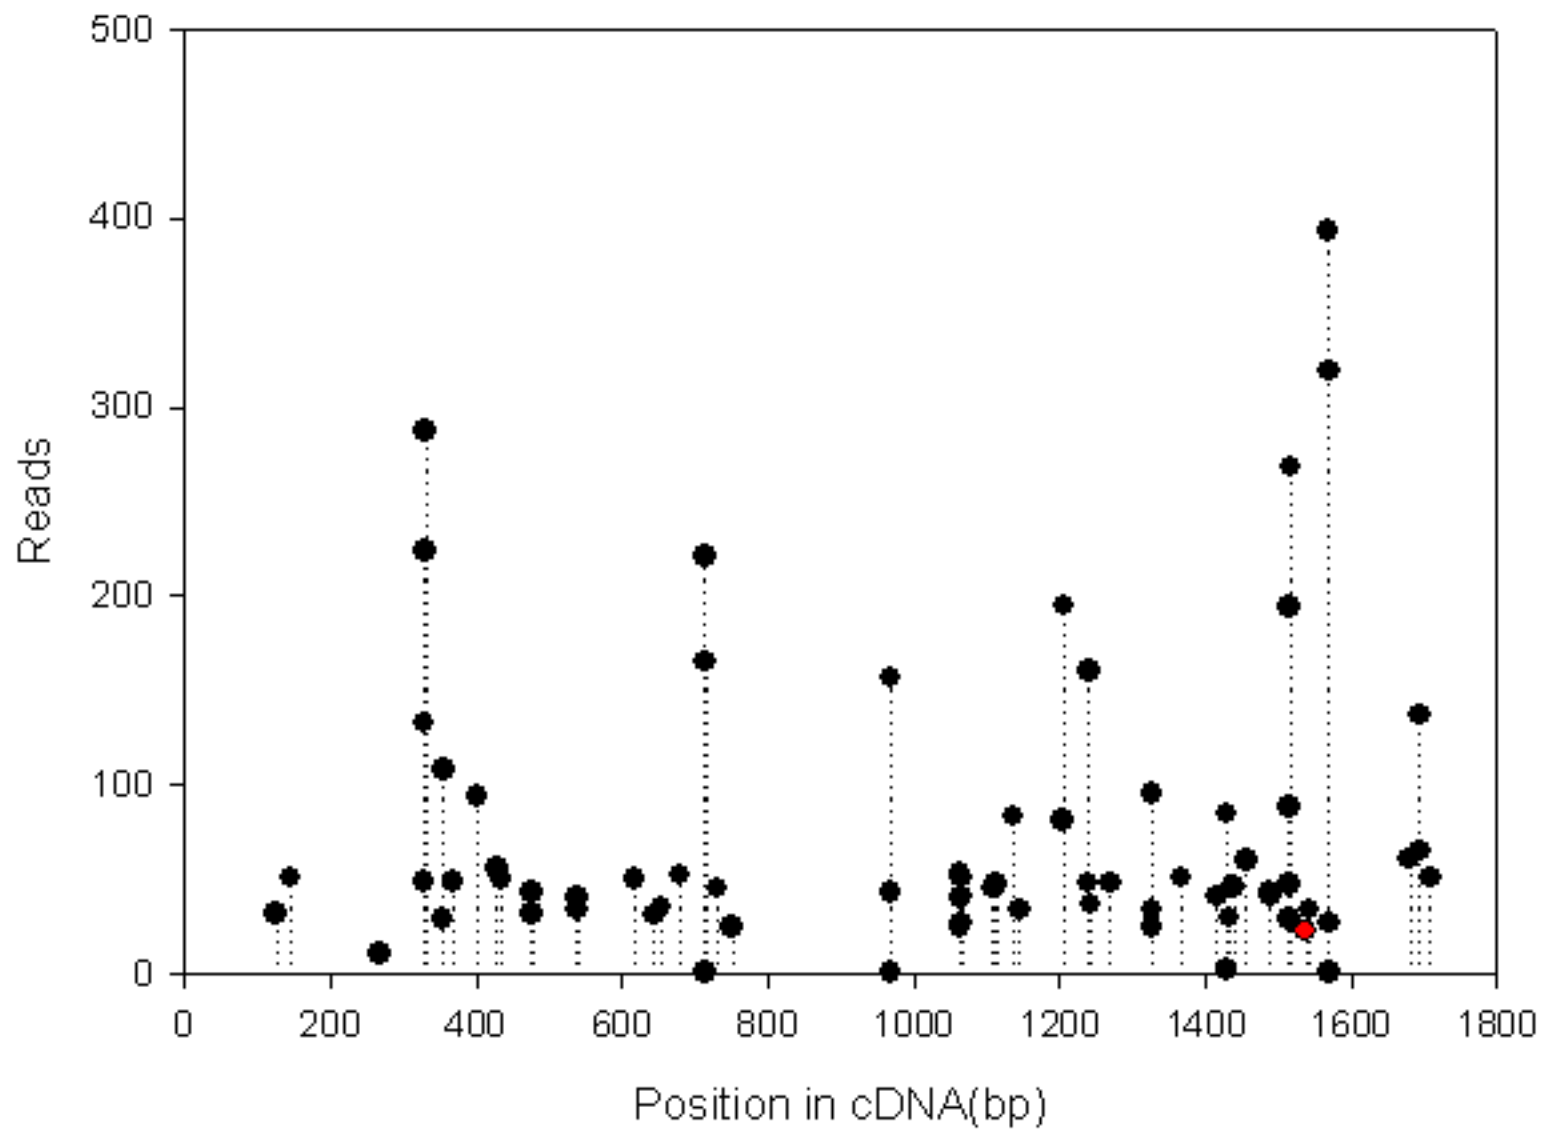

```

5' UUC-AGAAAGCCUUGGAGAGAUUAACC 3'      Cs6g06560.1
   ::: : : : : : : : : : : : : : :
3' AAGUUCUUUCGGCACCCU----- 5'      Csi-miR396d.4
  
```

Csi-miR396d.4, target=Cs7g12930.1 gene=Cs7g12930  
 Category:1  
 Score=4.5  
 Cleavage Site=1079



```

5' UAGUAUUAAGAAAGCUGAGGAAAAAG 3'      Cs7g12930.1
   : : : : : : : : : : : : : : :
3' ----AAGUUCUUUCGGCACCUU---- 5'      Csi-miR396d.4
  
```



Csi-miR396d.4, target=Cs7g15220.1 gene=Cs7g15220  
Category:1  
Score=2  
Cleavage Site=377

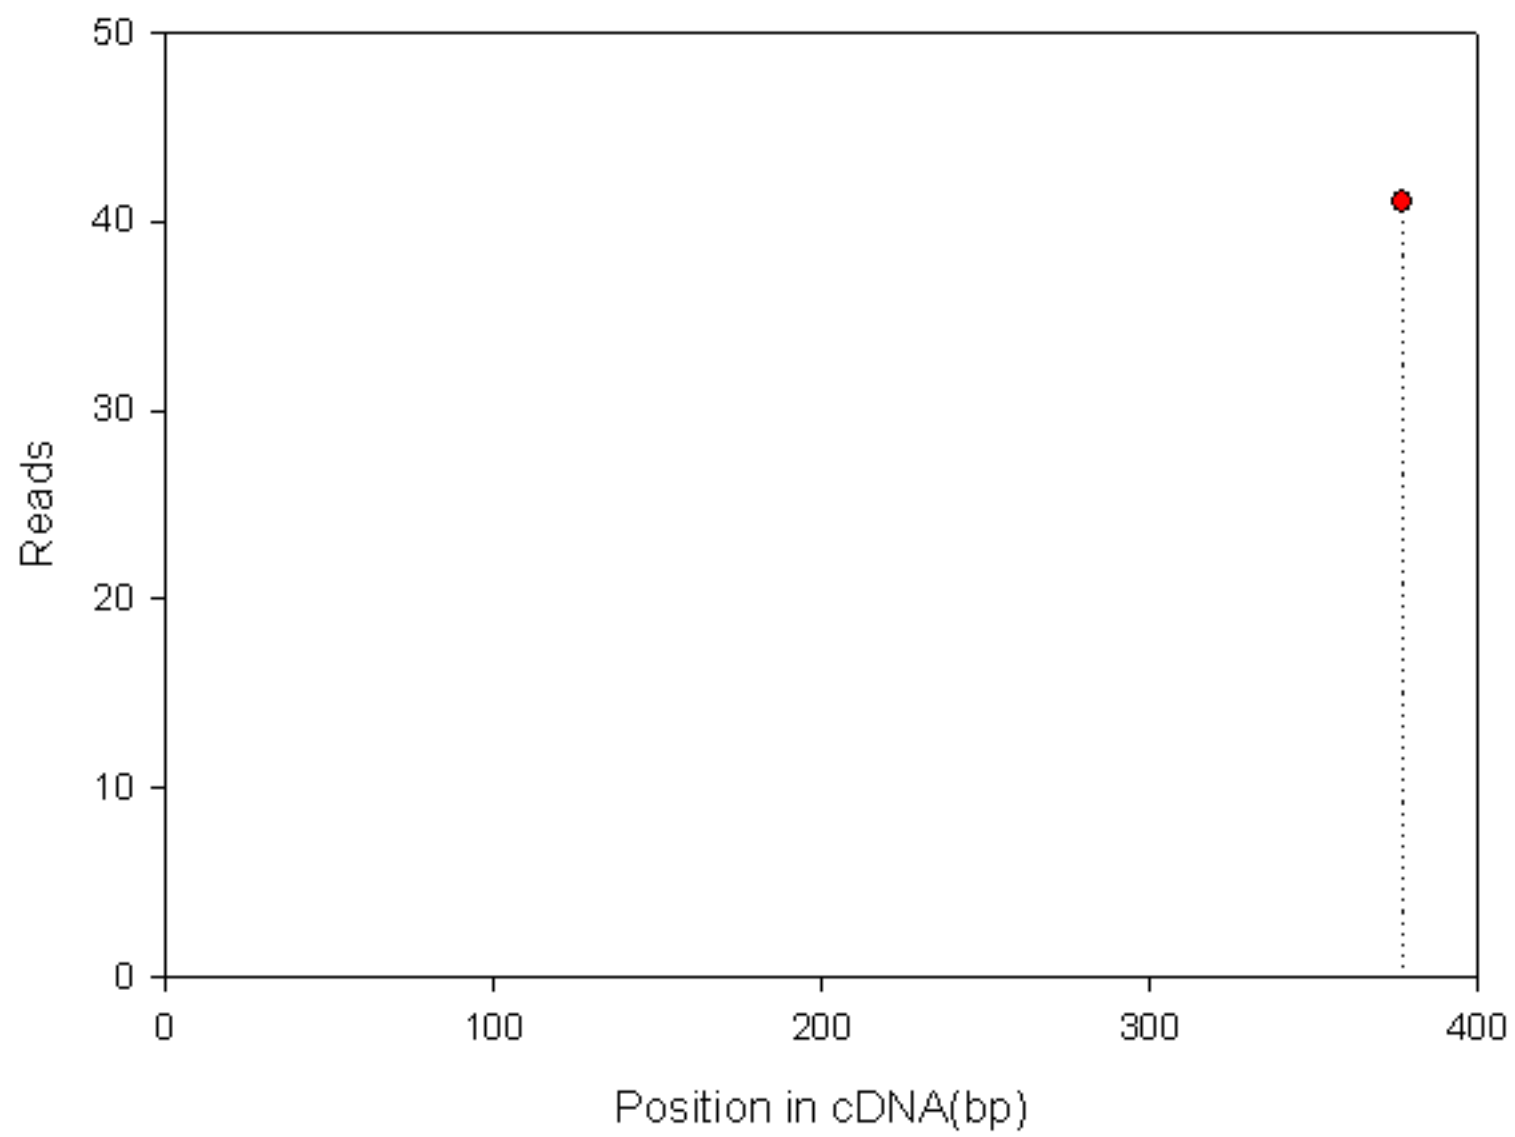

```
5' ACCGUUCAAGAAAGCCUGUGGAAUCA 3'      Cs7g15220.1
      :::::::::::::: :::::
3' ----AAGUUCUUUCGG-CACCUU---- 5'      Csi-miR396d.4
```

Csi-miR396d.4, target=Cs8g15450.1 gene=Cs8g15450  
 Category:3  
 Score=4.5  
 Cleavage Site=219



```

5' GUUCAGCAGAGCCGUGGAUGGGUUCA 3'      Cs8g15450.1
   : : : : . : : : : : : : : :
3' -AAGUUCUUUCGGCACCUU----- 5'      Csi-miR396d.4
  
```

Csi-miR396d.4, target=Cs8g17370.1 gene=Cs8g17370  
 Category:3  
 Score=2.5  
 Cleavage Site=137



```

5' GCGAGGAUUACAAGAAGGCCGUGGAG 3'      Cs8g17370.1
      : : : : : . : : : : : : : : :
3' -----AAGUUCUUUCGGCACCUU 5'      Csi-miR396d.4

```

Csi-miR396d.4, target=Cs9g14020.1 gene=Cs9g14020  
 Category:3  
 Score=4  
 Cleavage Site=639

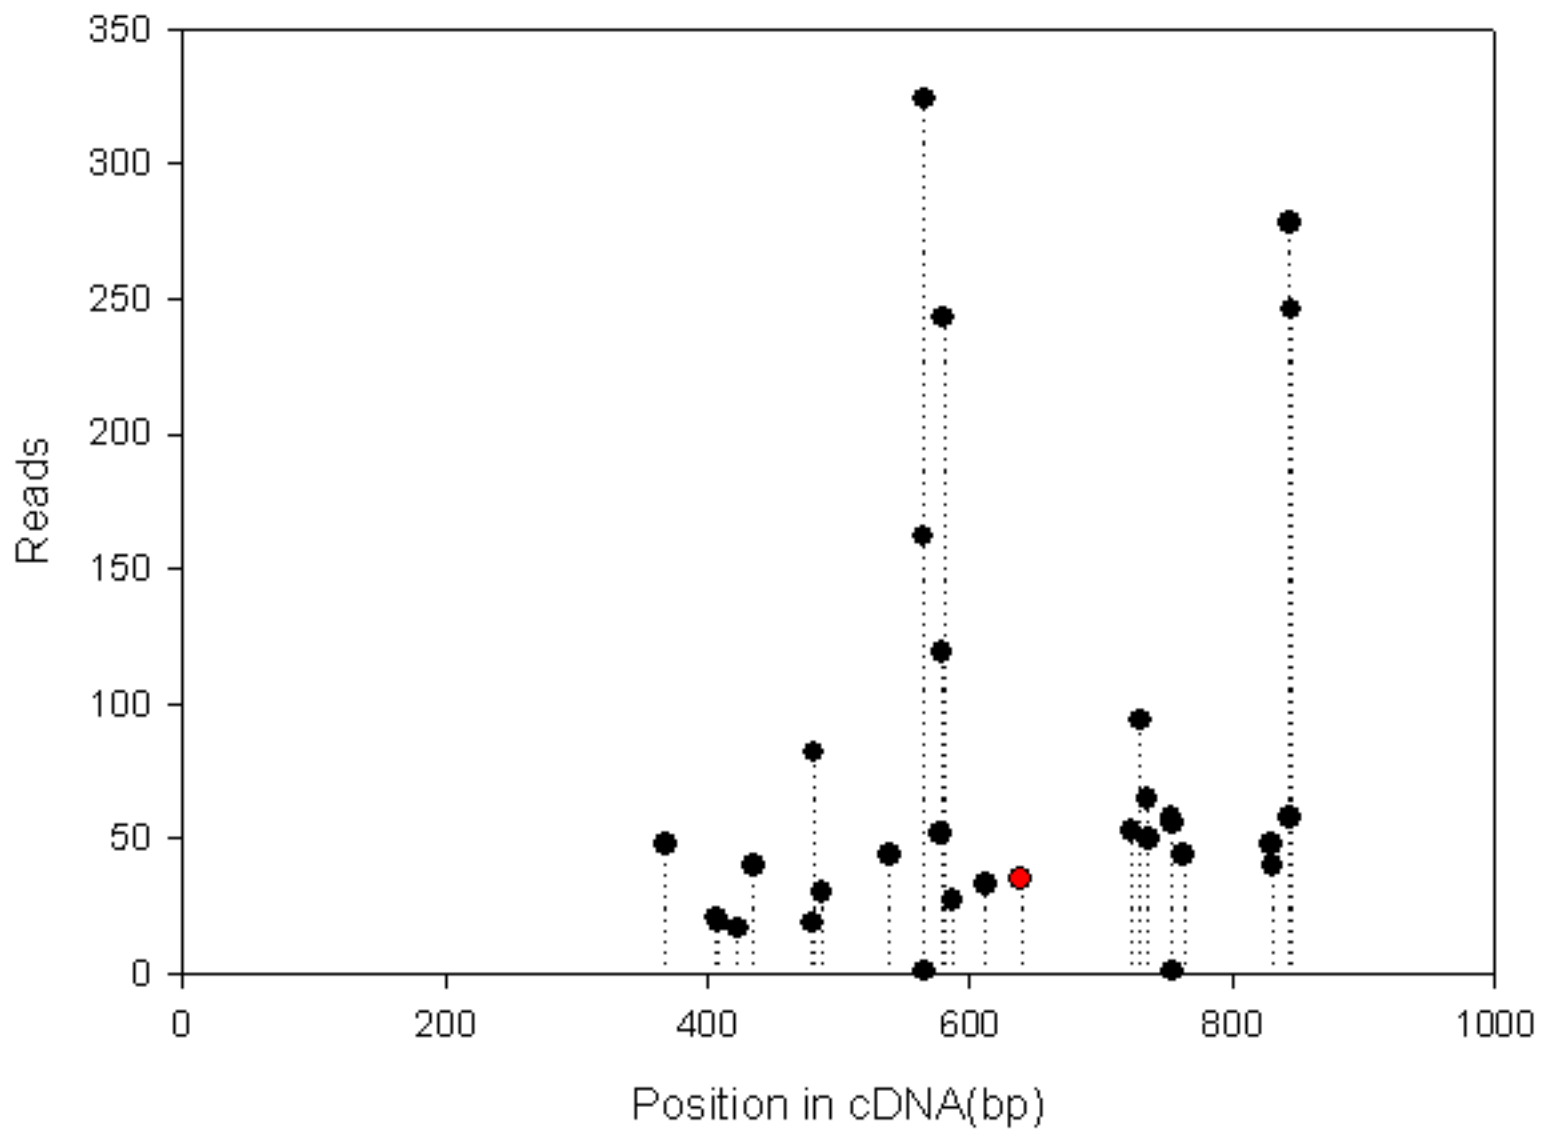

5' GGCCCAUC-AGAAAGCCUGGAACGCC 3'

Cs9g14020.1

:: ::::: :::::

3' -----AAGUUCUUUCGGCACCUU----- 5'

Csi-miR396d.4

Csi-miR396d.4, target=Cs9g19220.1 gene=Cs9g19220  
 Category:3  
 Score=4.5  
 Cleavage Site=1829



5' GGUGAGAGCAAGAAGGCUGUGGAGAA 3'

Cs9g19220.1

.....

3' -----AAGUUCUUUCGGCACCUU-- 5'

Csi-miR396d.4



Csi-miR396d.4, target=Orange1.1t02555.1 gene=Orange1.1t02555

Category:1

Score=2

Cleavage Site=920

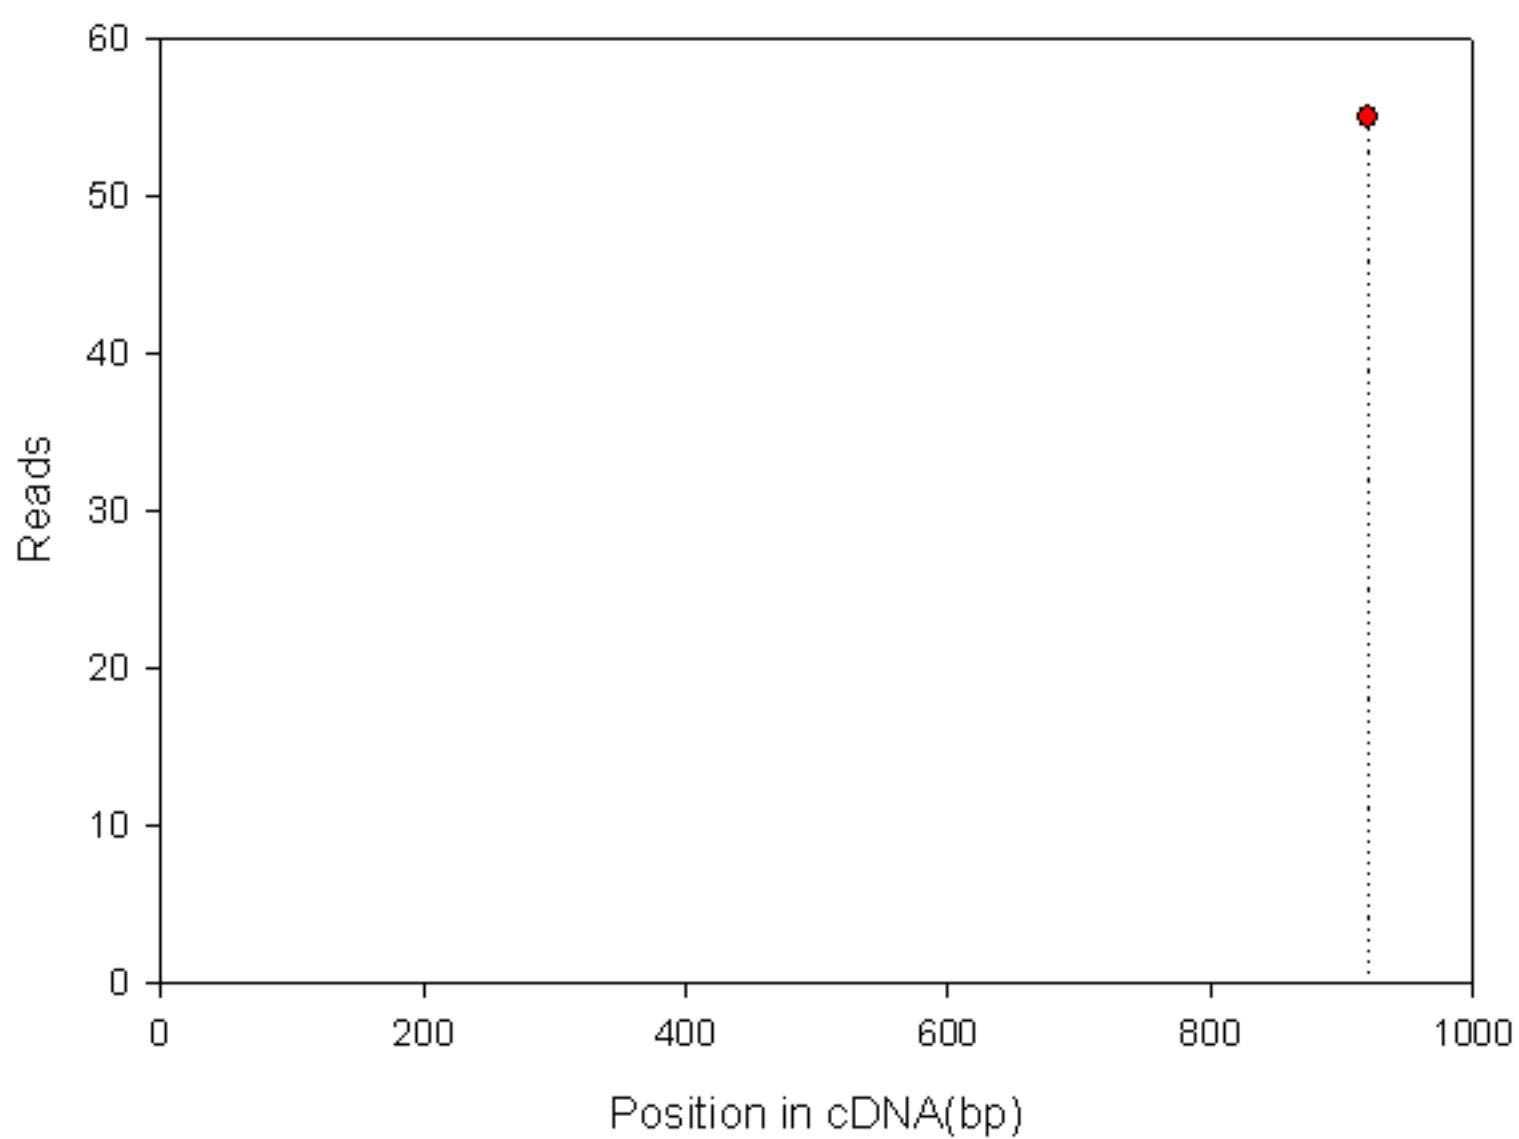

5' CACGUUCAAGAAAGCCUGUGGAACUU 3'

Orange1.1t02555.1

:::::::::::: :::::

3' ----AAGUUCUUUCGG-CACCUU---- 5'

Csi-miR396d.4

Csi-miR396d.4, target=Orange1.1t02739.1 gene=Orange1.1t02739  
 Category:2  
 Score=4.5  
 Cleavage Site=1251

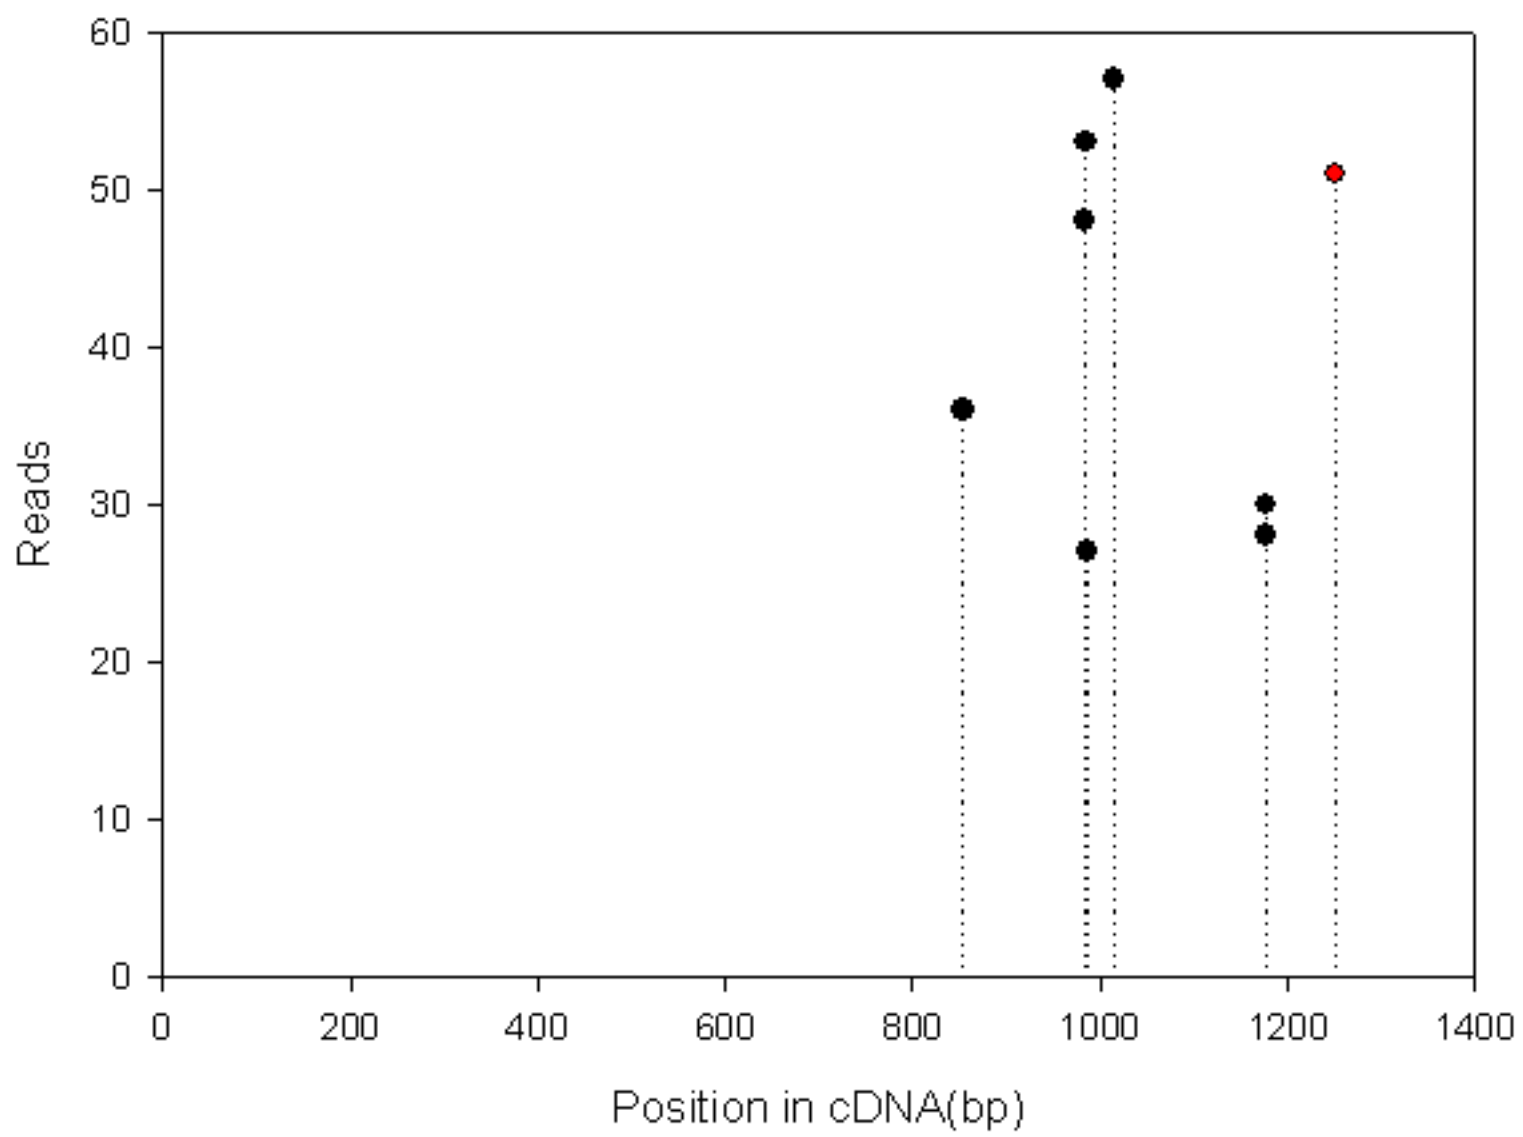

|                                   |                   |
|-----------------------------------|-------------------|
| 5' CUAUCAGAAAAGACCGUGGAAAUGGA 3'  | Orange1.1t02739.1 |
| : : : : . : : : : : : : : : : : : |                   |
| 3' --AAGUUCUUUC-GGCACCUU----- 5'  | Csi-miR396d.4     |



Csi-miR396d.4, target=Orange1.1t03122.1 gene=Orange1.1t03122  
 Category:2  
 Score=2  
 Cleavage Site=583



5' ACCGUUCAAGAAAGCCUGUGGAAUCA 3'  
 :::::::::::::: :::::  
 3' ----AAGUUCUUUCGG-CACCUU--- 5'

Orange1.1t03122.1  
 Csi-miR396d.4

Csi-miR396d-3p, target=Cs8g05290.1 gene=Cs8g05290  
 Category:2  
 Score=5  
 Cleavage Site=160

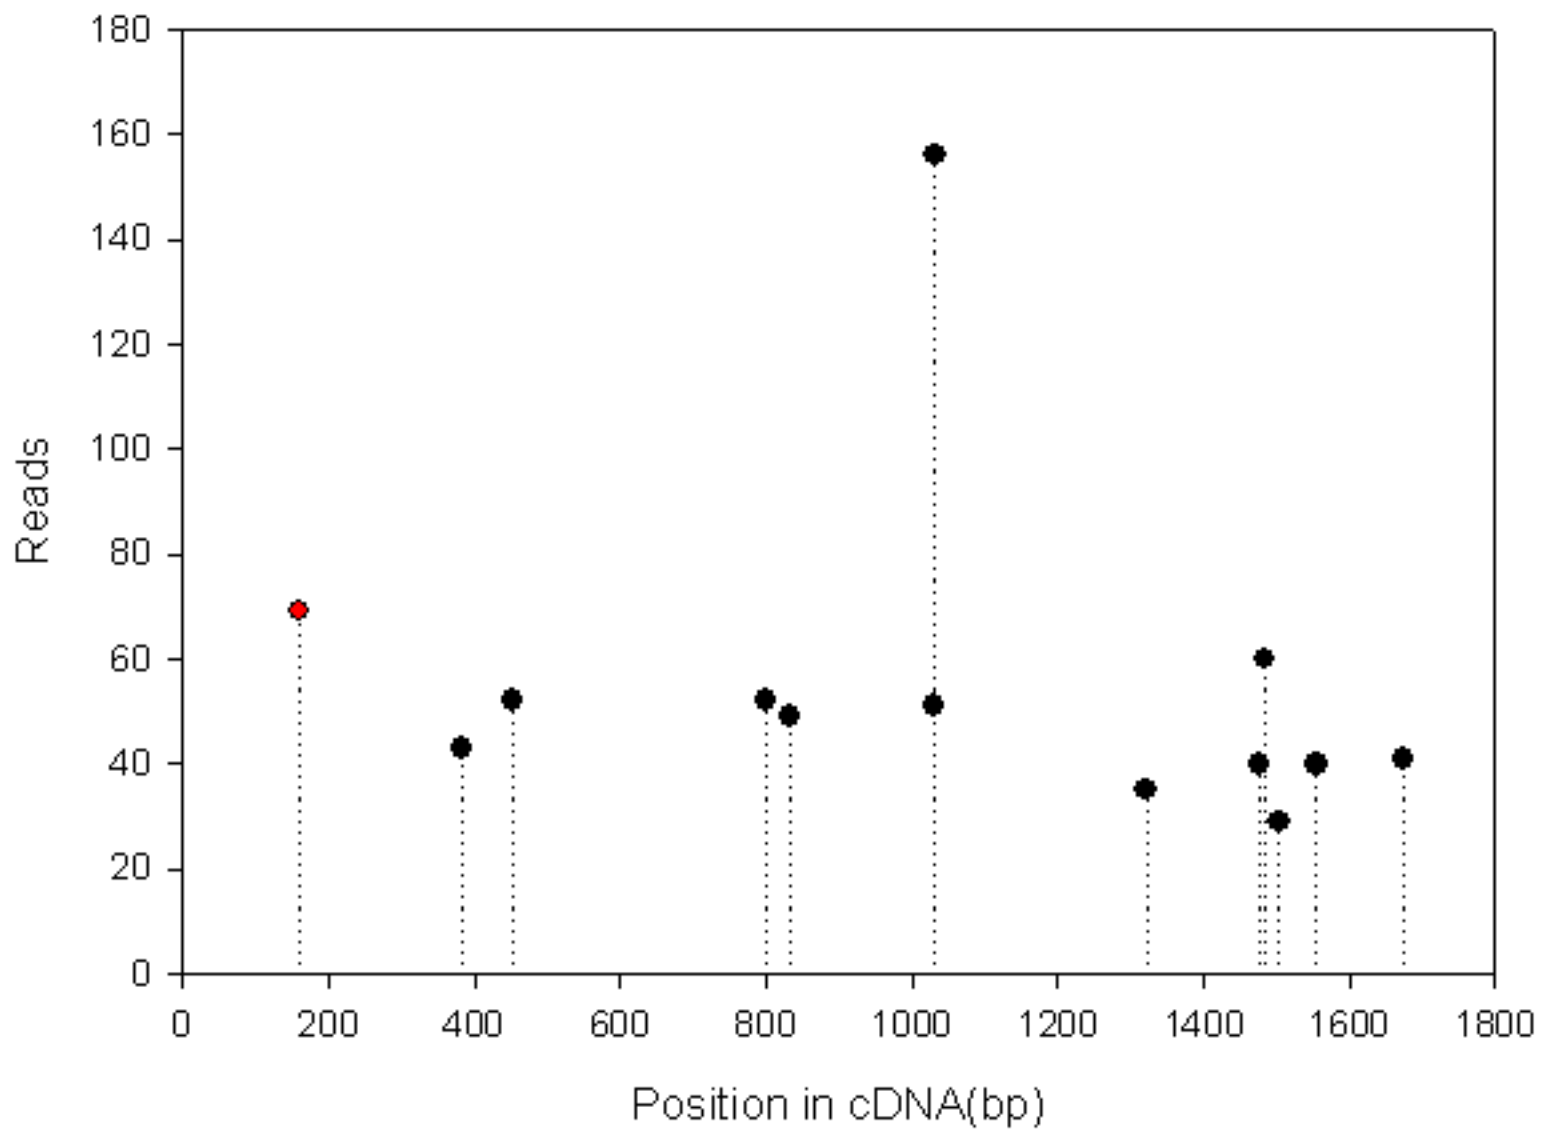

|                                     |                |
|-------------------------------------|----------------|
| 5' UAUUUUUACGGCUUUCUUGAGUCCA 3'     | Cs8g05290.1    |
| : : : : : : : : : : : : : : : : : . |                |
| 3' --AAAGGGUGCCGUAAGAACUCG--- 5'    | Csi-miR396d-3p |

Csi-miR398b, target=Cs1g13240.1 gene=Cs1g13240  
category:1  
score=4  
Cleavage Site=273

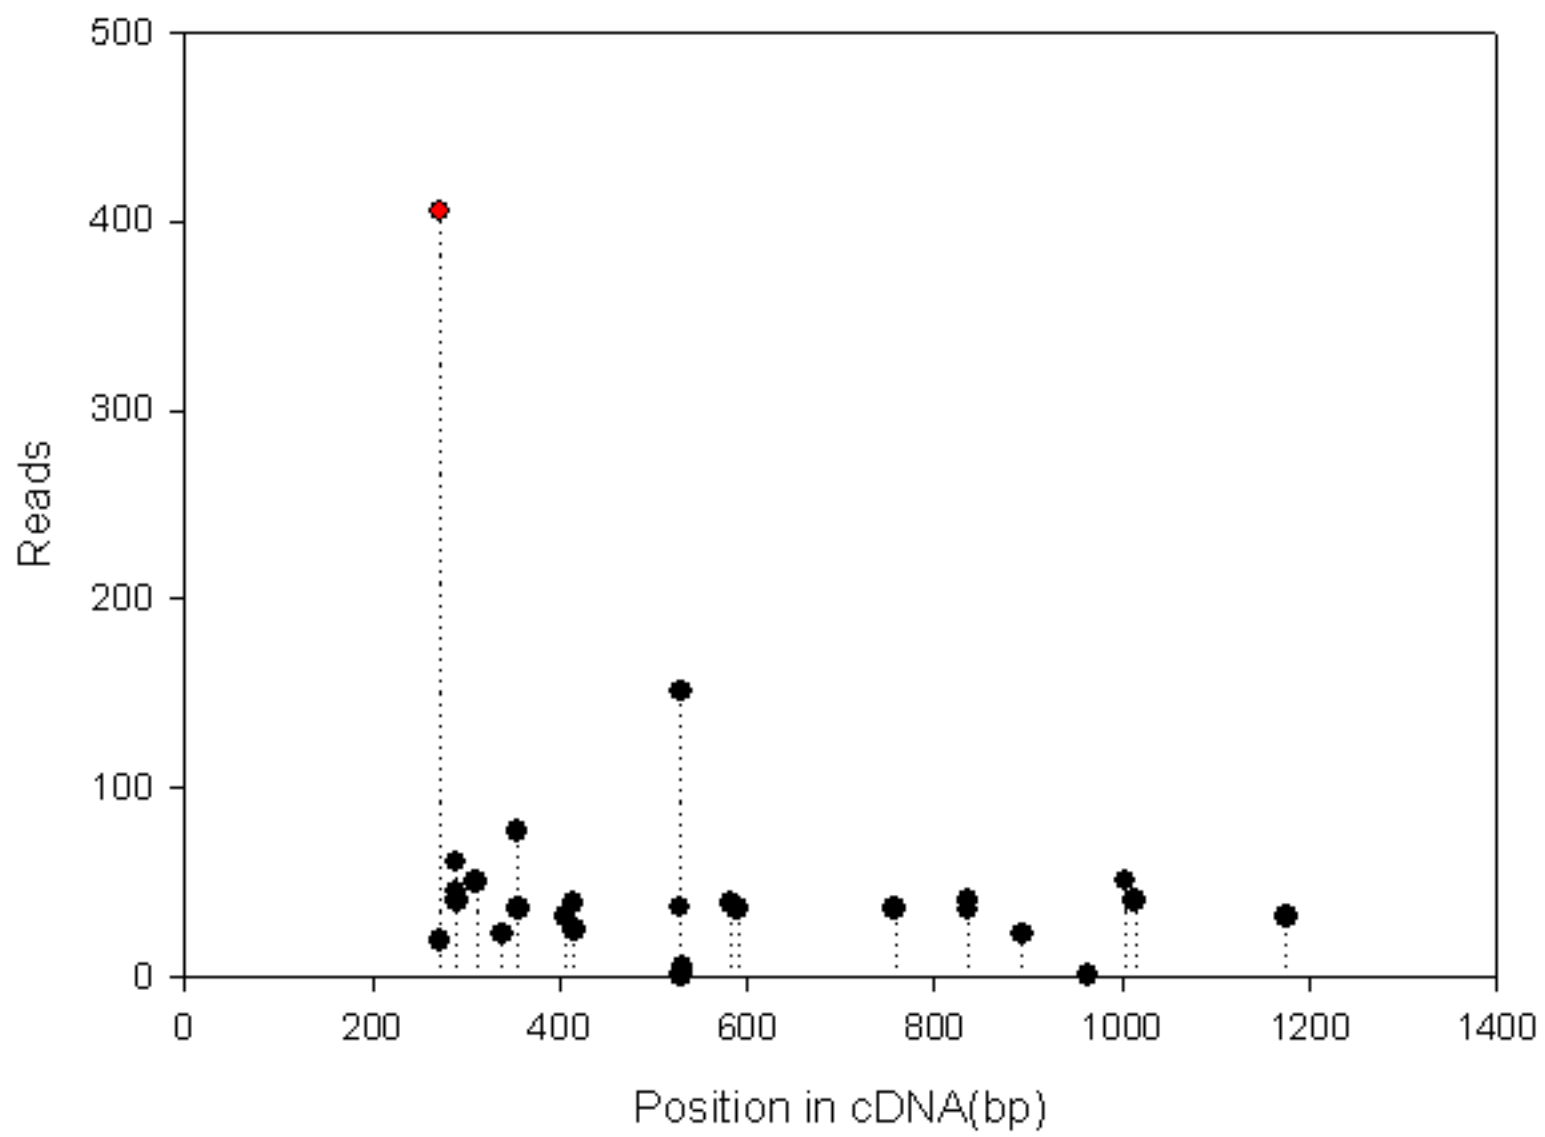

```

5' GAAAAAAGGGGCGACCUGAGAAU-CA 3'      Cs1g13240.1
   ::::::::::::::::::::: ::
3' -----GUCCCCGCUGGACUCUUGUGU 5'      Csi-miR398b

```

Csi-miR399d, target=Cs4g08850.1 gene=Cs4g08850  
 Category:3  
 Score=4.5  
 Cleavage Site=560

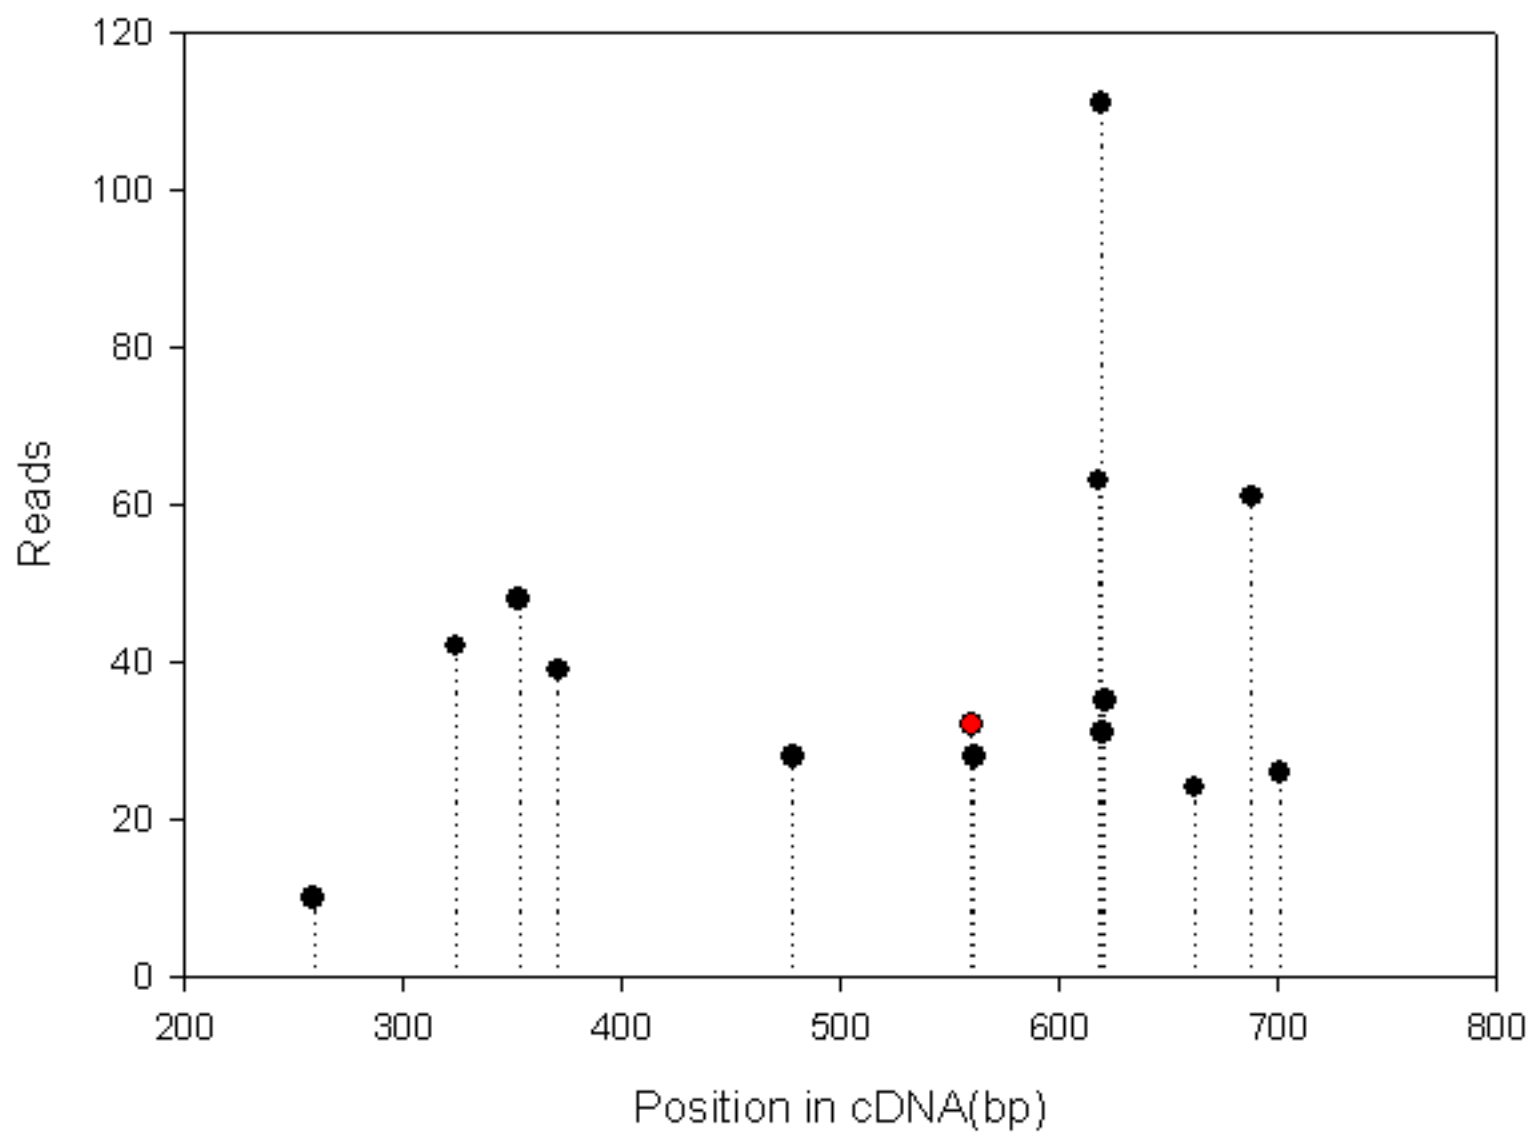

```

5' CACGGU-CCUCUUCUUUGGCAAACCU 3'      Cs4g08850.1
   ::  ::  :::::
3' GUCCCGUUGAGAGGAAACCGU----- 5'      Csi-miR399d

```



Csi-miR403.3, target=Cs3g01650.1 gene=Cs3g01650  
 Category:3  
 Score=5  
 Cleavage Site=2429

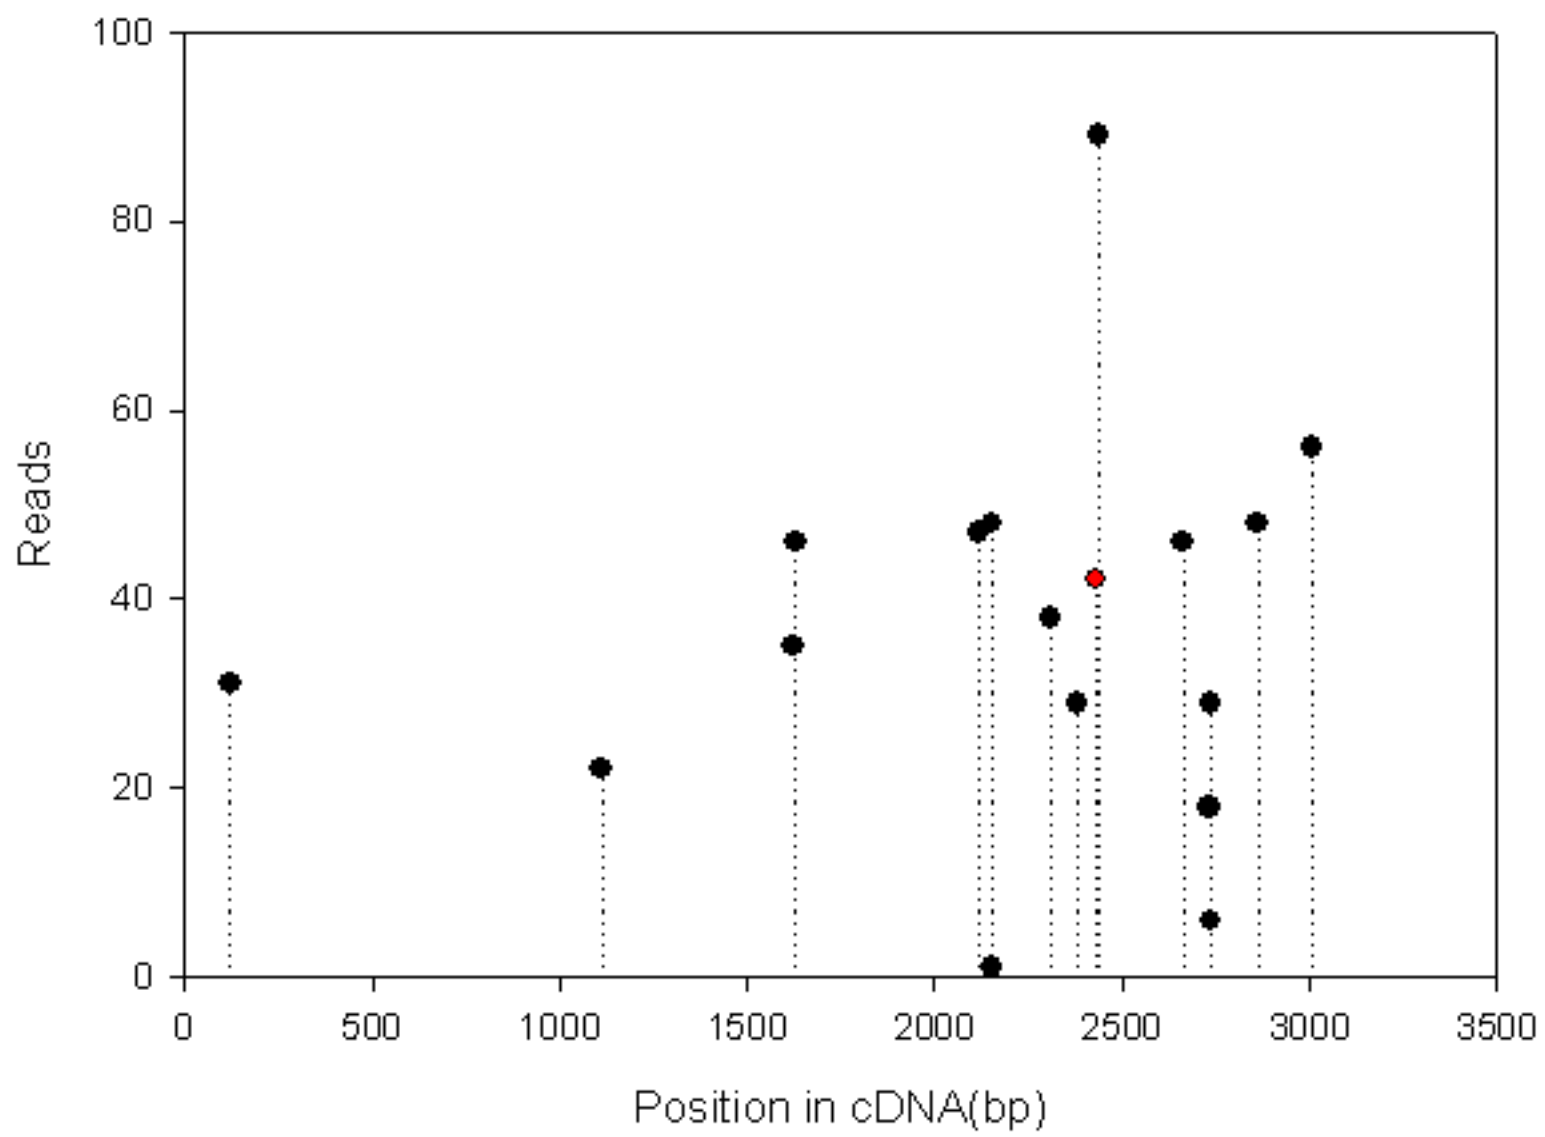

```

5' GUUU-UGUGAGAAUUUAAGUGGAGCUG 3'      Cs3g01650.1
   :::: :::: :::::
3' CAAACACGCACUUAGAUU----- 5'      Csi-miR403.3
  
```

Csi-miR403.3, target=Cs8g07240.1 gene=Cs8g07240  
 Category:3  
 Score=5  
 Cleavage Site=530

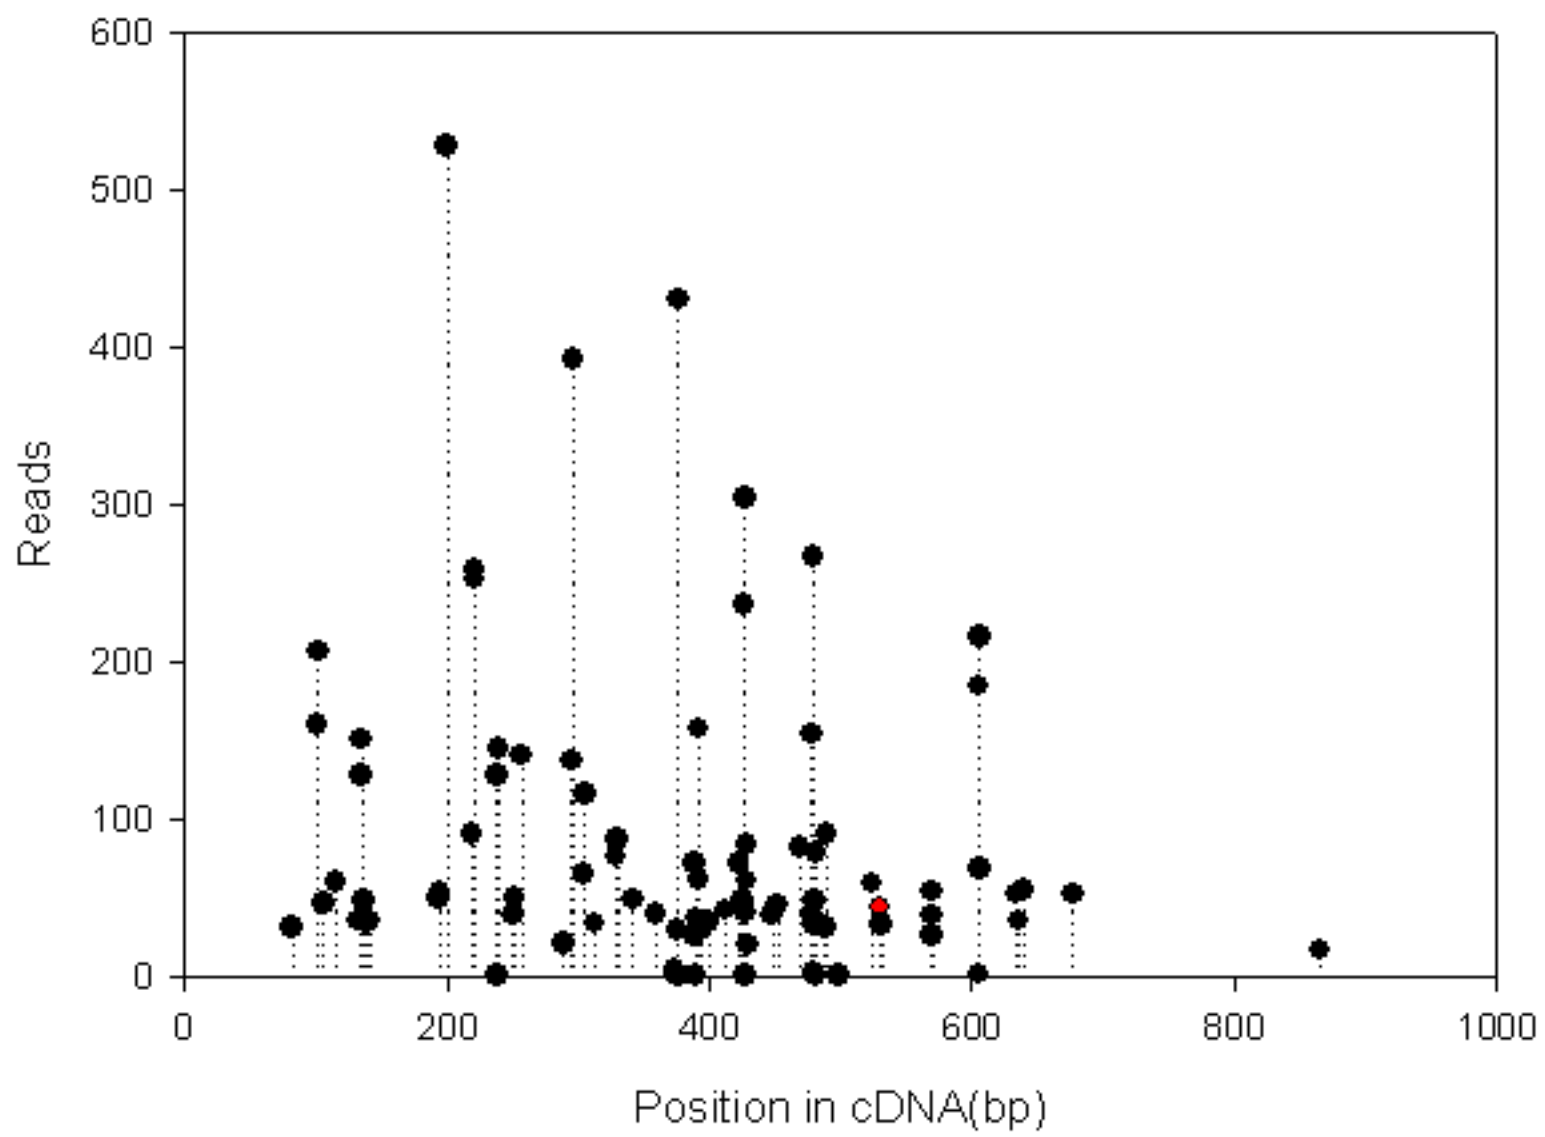

```

5' UUUUGUUUCU-UGUGAAUCUAUUUGAG 3'      Cs8g07240.1
   : : : : : : : : : : : : : : : :
3' ----CAAACACGCACUUAGAUU----- 5'     Csi-miR403.3

```

Csi-miR403.3, target=Cs9g07320.1 gene=Cs9g07320  
 Category:3  
 Score=5  
 Cleavage Site=582

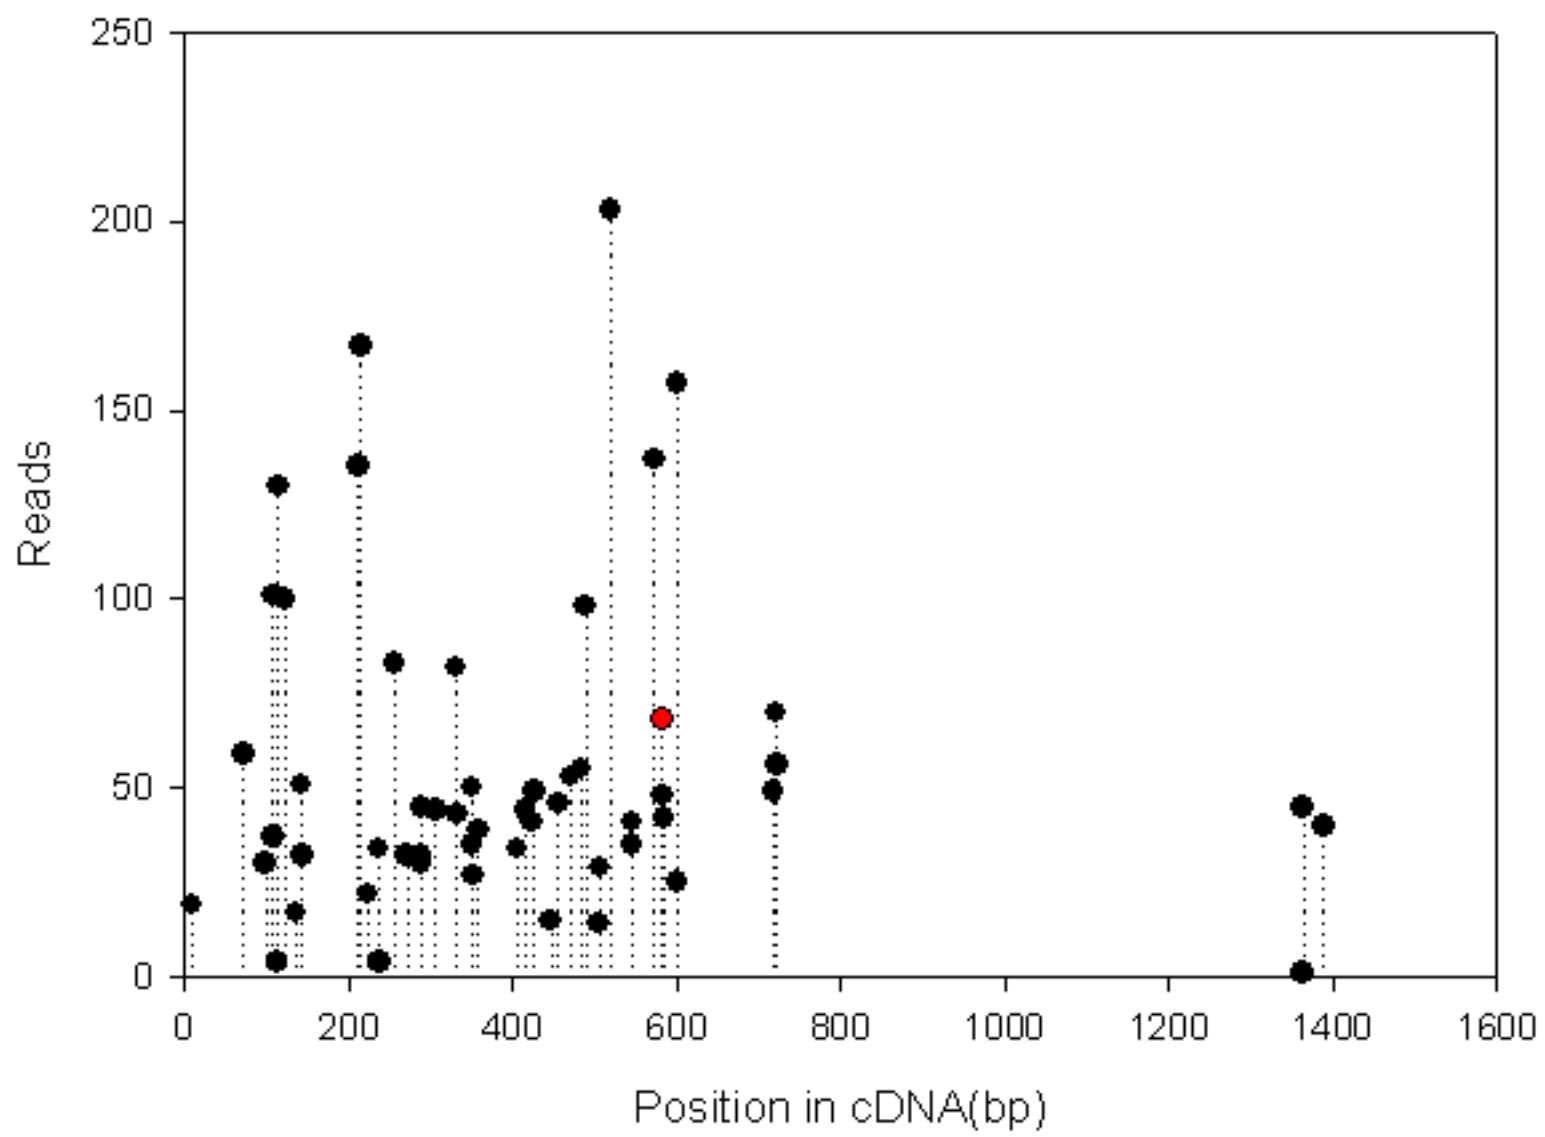

|    |                              |    |              |
|----|------------------------------|----|--------------|
| 5' | AGUAUGCUUG-GCGUGAAUCUGUCAAG  | 3' | Cs9g07320.1  |
|    | : : : : : : : : : .          |    |              |
| 3' | -----CAAACACGCACUUAGAUU----- | 5' | Csi-miR403.3 |



Csi-miR444a.1, target=Orange1.1t01329.1 gene=Orange1.1t01329  
 Category:2  
 Score=5  
 Cleavage Site=342

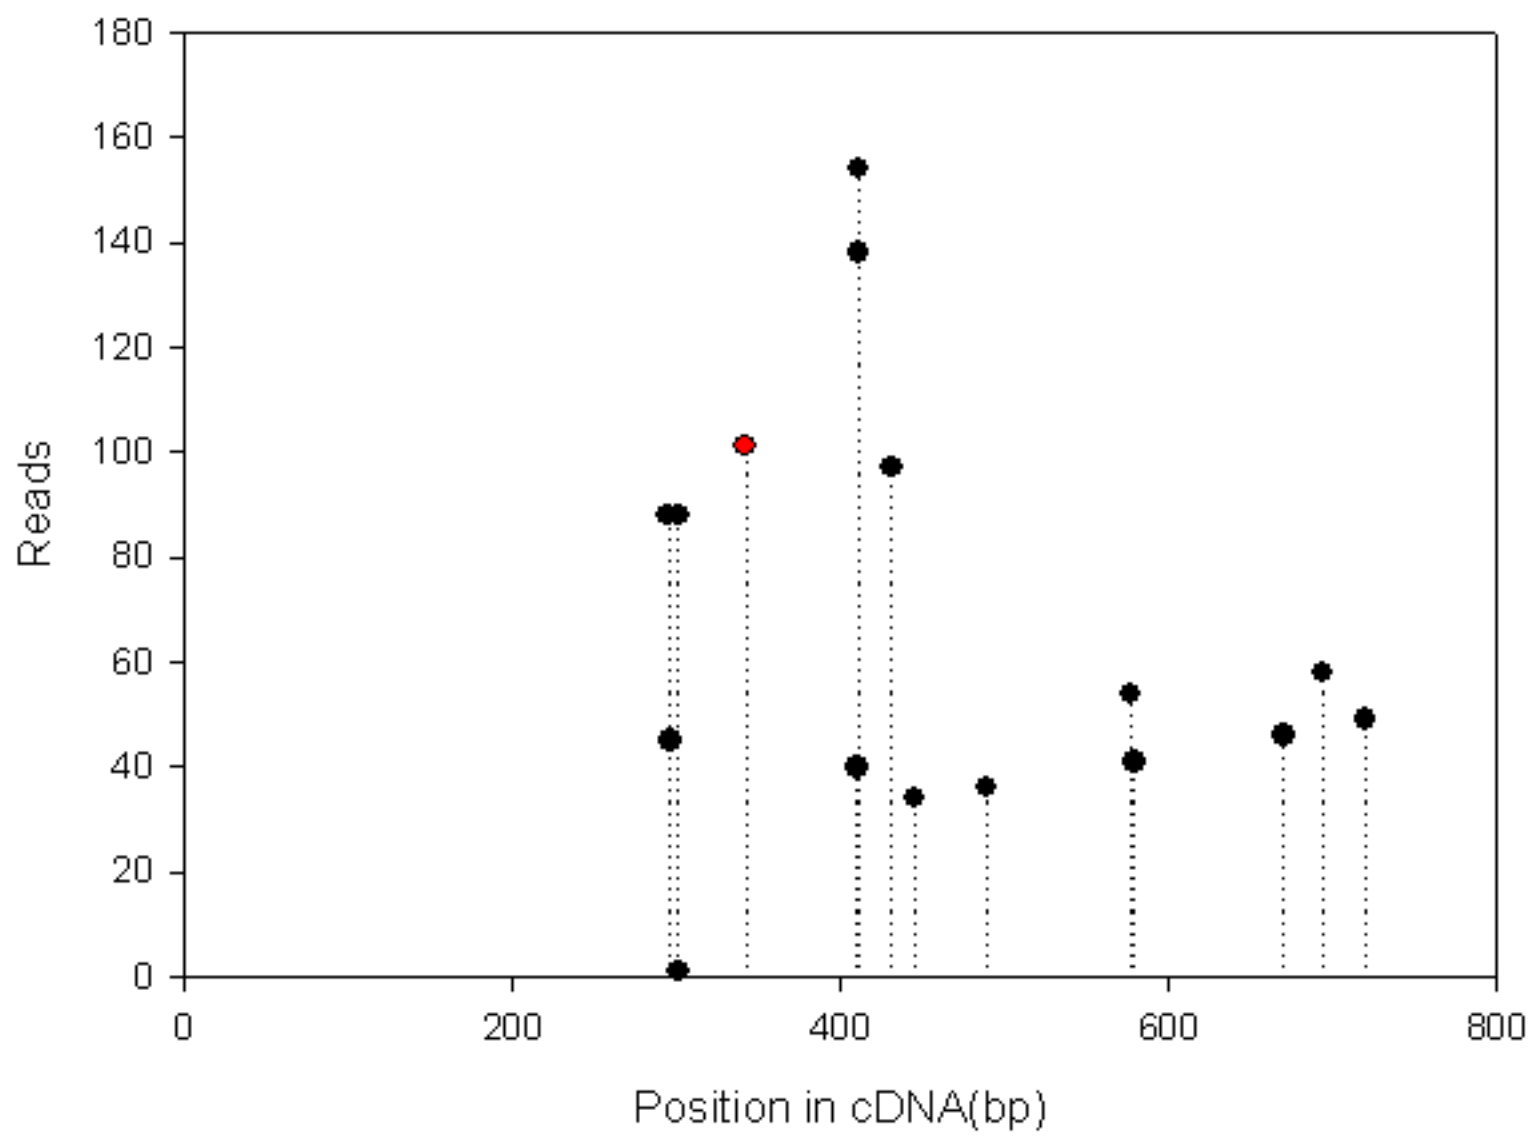

```

5' UG-AGGAAUUGUCUCAAGGAACCUUAC 3'      Orange1.1t01329.1
   :: : : ::::::::::::::::::::
3' ACGUACAAAACAGAGUUCUUU----- 5'      Csi-miR444a.1

```



Csi-miR472, target=Cs1g13430.1 gene=Cs1g13430  
 Category:1  
 Score=5  
 Cleavage Site=700

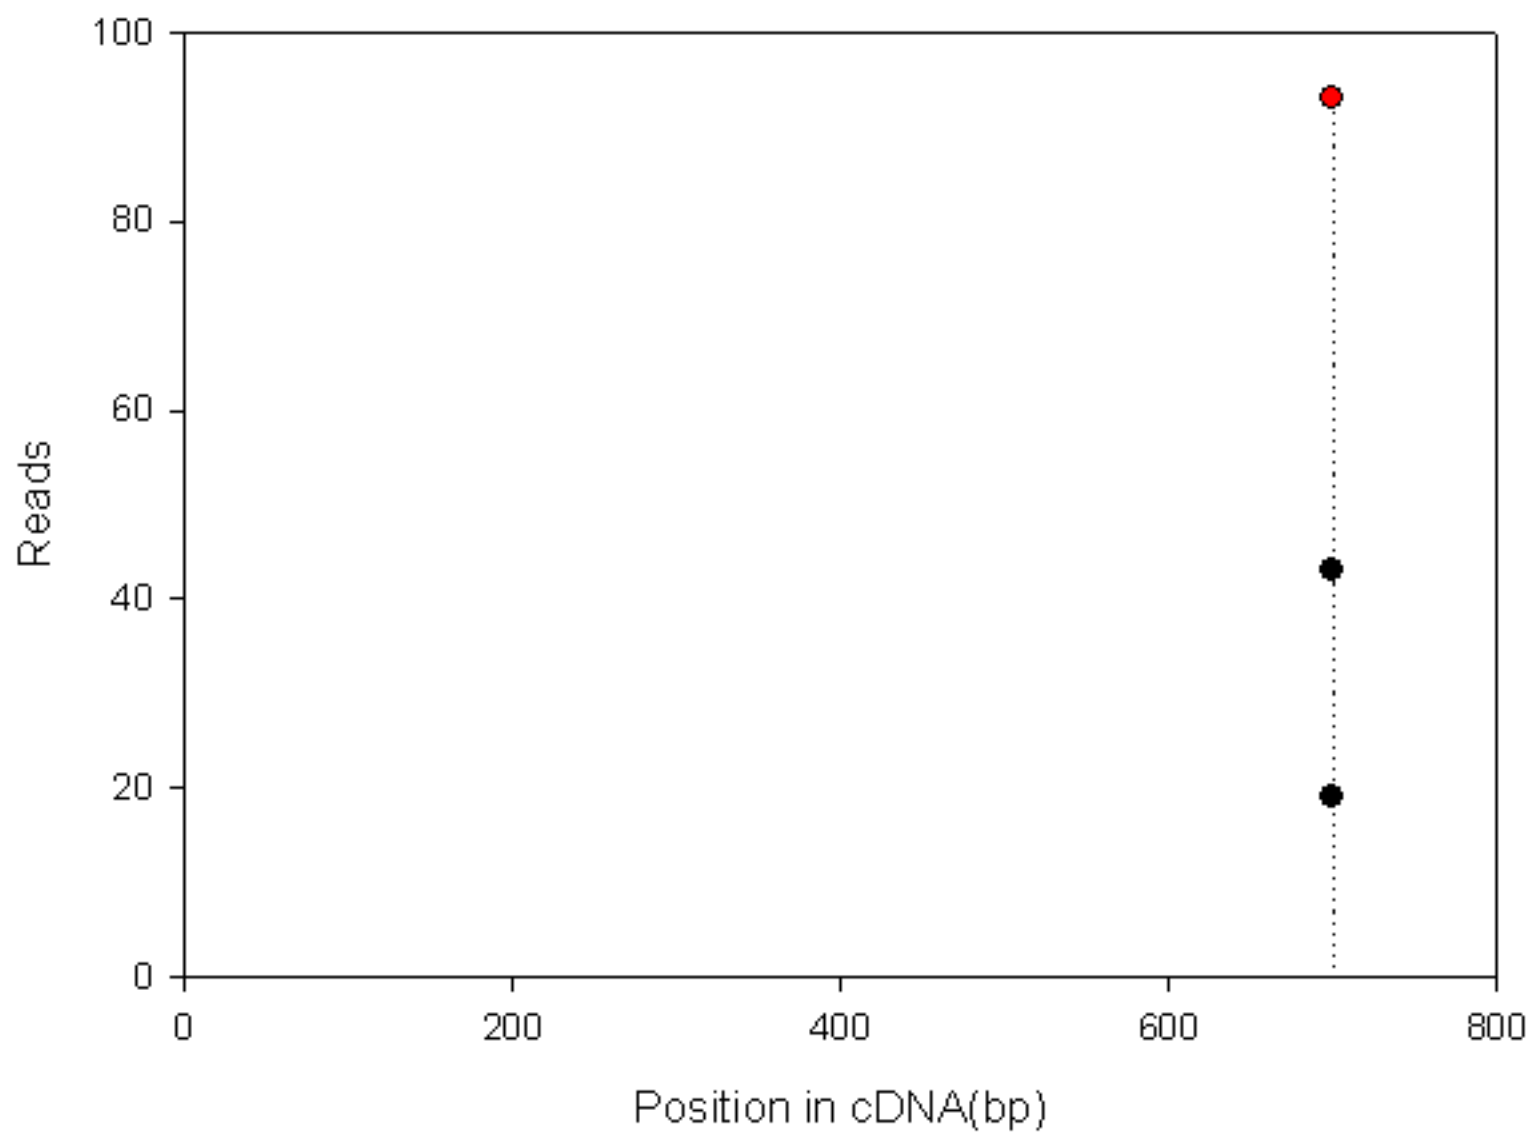

```

5' GGCAUGGGAGGGGUGGGUAAAACUAC 3'      Cs1g13430.1
   :: :::::::::: ::::: :::
3' CCCUACCCUCCACACCCUUUU----- 5'      Csi-miR472
  
```

Csi-miR472, target=Cs2g30590.1 gene=Cs2g30590  
 Category:1  
 Score=5  
 Cleavage Site=889

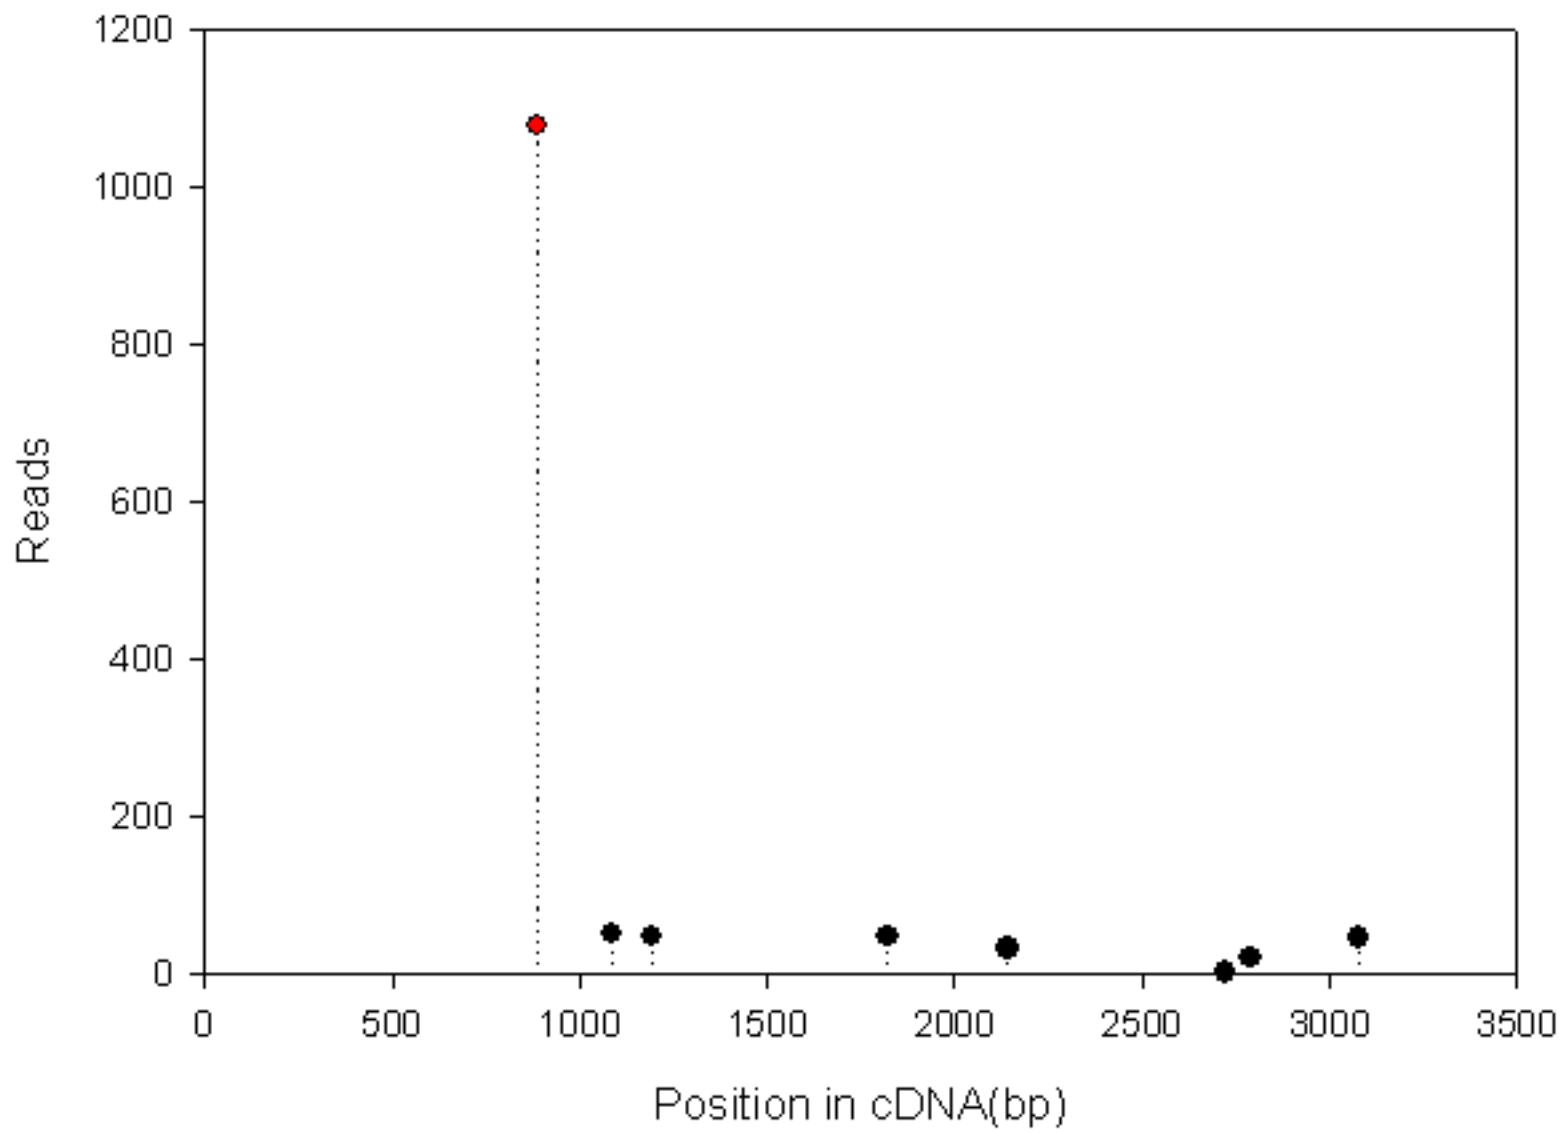

```

5' GGUAUGGGAGGUUUGGGCAAACAAC 3'      Cs2g30590.1
  :: :::::::::::::: :::: ::::
3' CCUACCCUCCACACCCUUUU----- 5'      Csi-miR472
  
```

Csi-miR472, target=Orange1.1t01918.1 gene=Orange1.1t01918  
 Category:1  
 Score=5  
 Cleavage Site=562

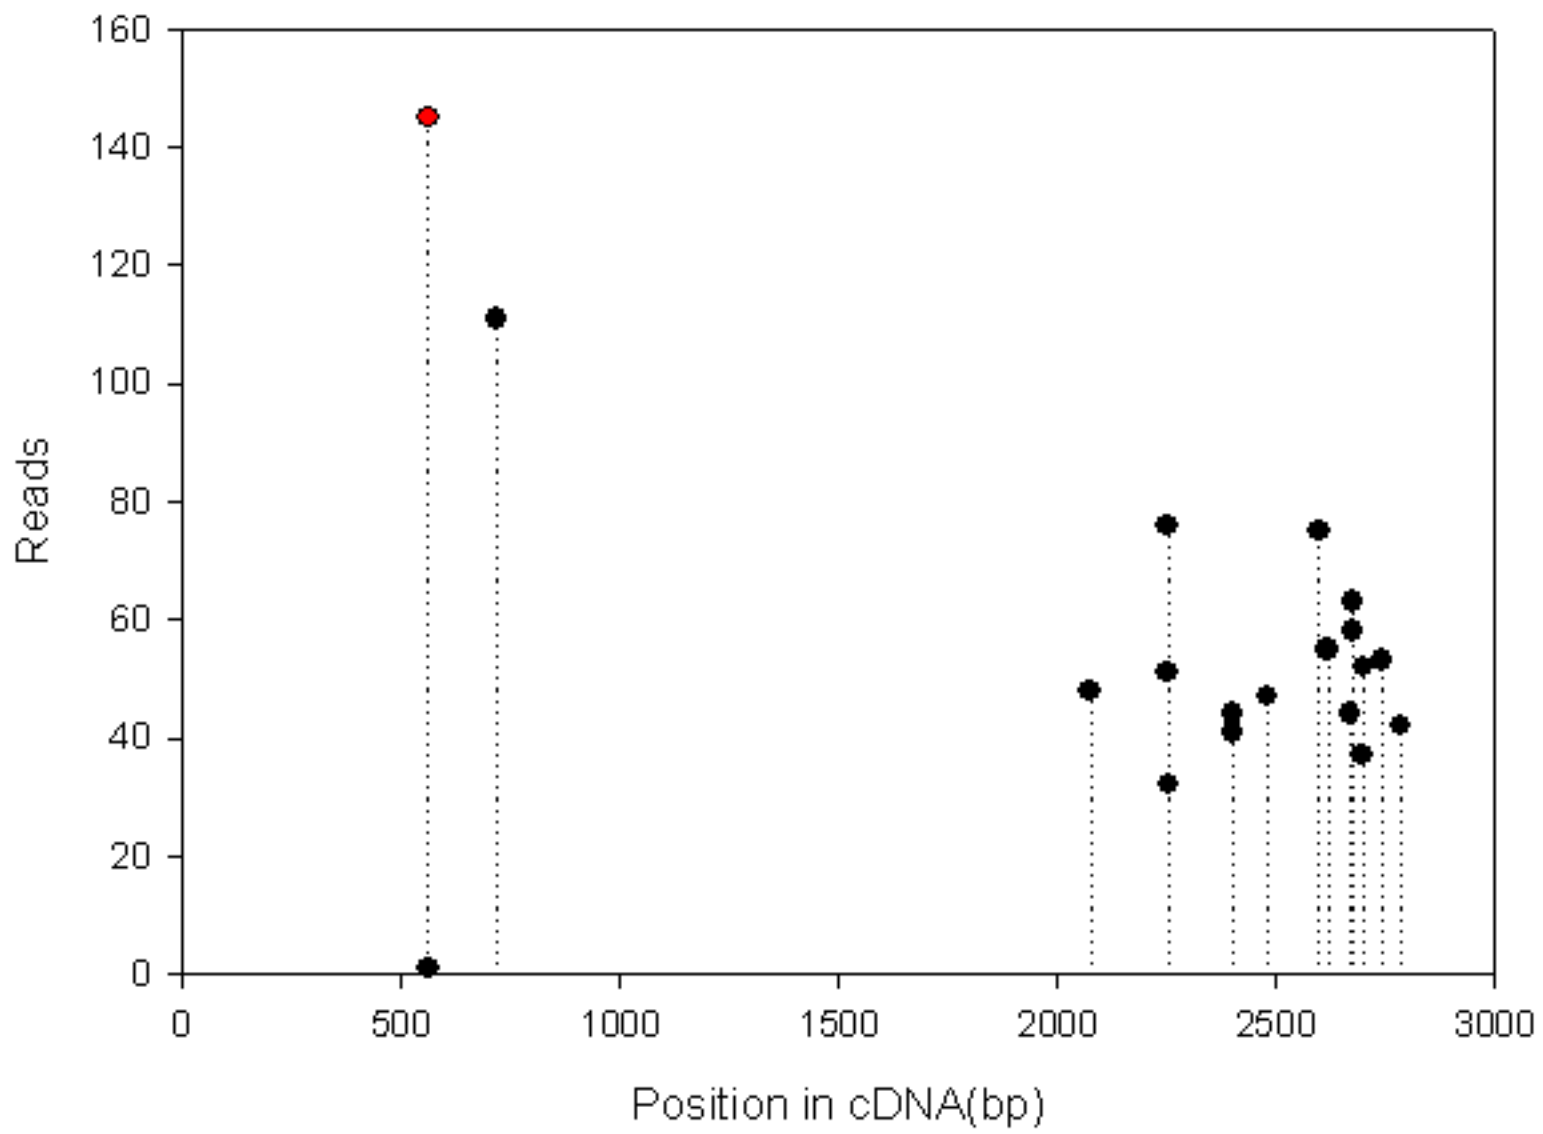

```
5' GGUAUGGGAGGUUAUAGGGAAAACCAC 3'
   :: ::::::::::: : :::::::::::
3' CCCUACCCUCCACA-CCCUUUU----- 5'
```

Orange1.1t01918.1

Csi-miR472

Csi-miR477a-3p, target=Cs6g19680.1 gene=Cs6g19680  
 Category:3  
 Score=4.5  
 Cleavage Site=260

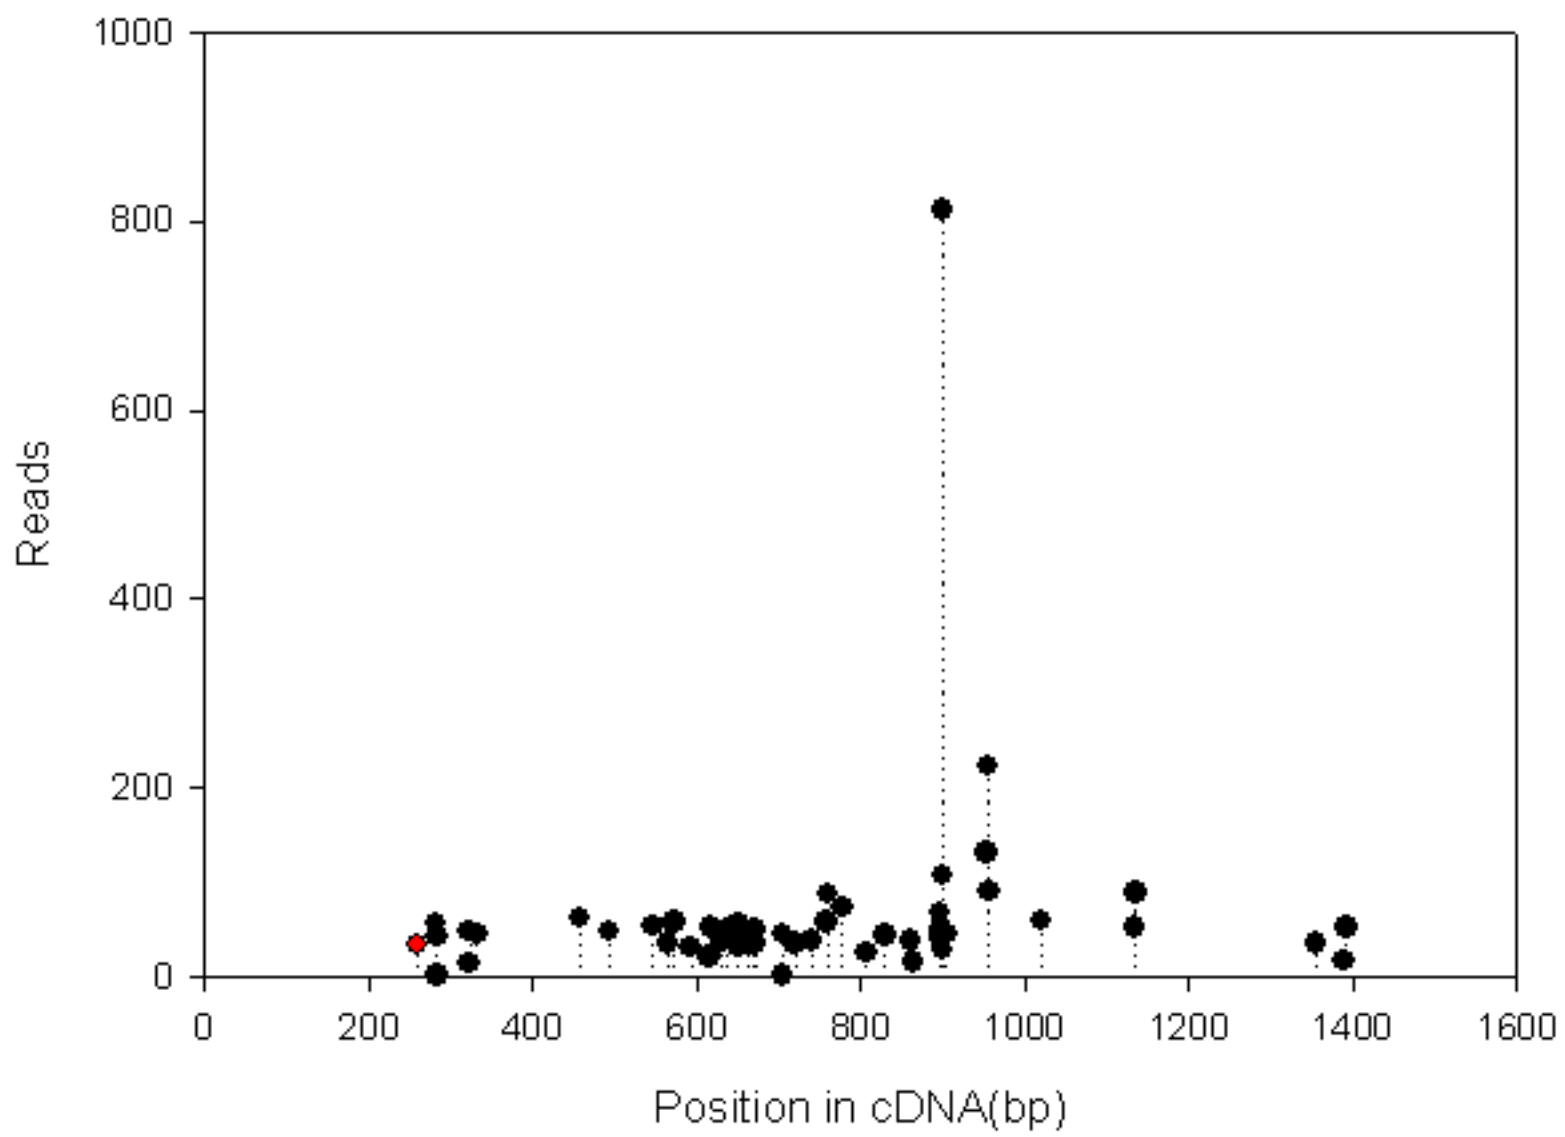

```

5' UUUUUUUUCUCUCUCUAGGGUUUCCA 3'      Cs6g19680.1
      . . . . .
3' ----GCUGGAGGGGGAUCCCAAAGG- 5'      Csi-miR477a-3p
  
```

Csi-miR477b.2, target=Cs3g10900.1 gene=Cs3g10900  
 Category:3  
 Score=4.5  
 Cleavage Site=1317

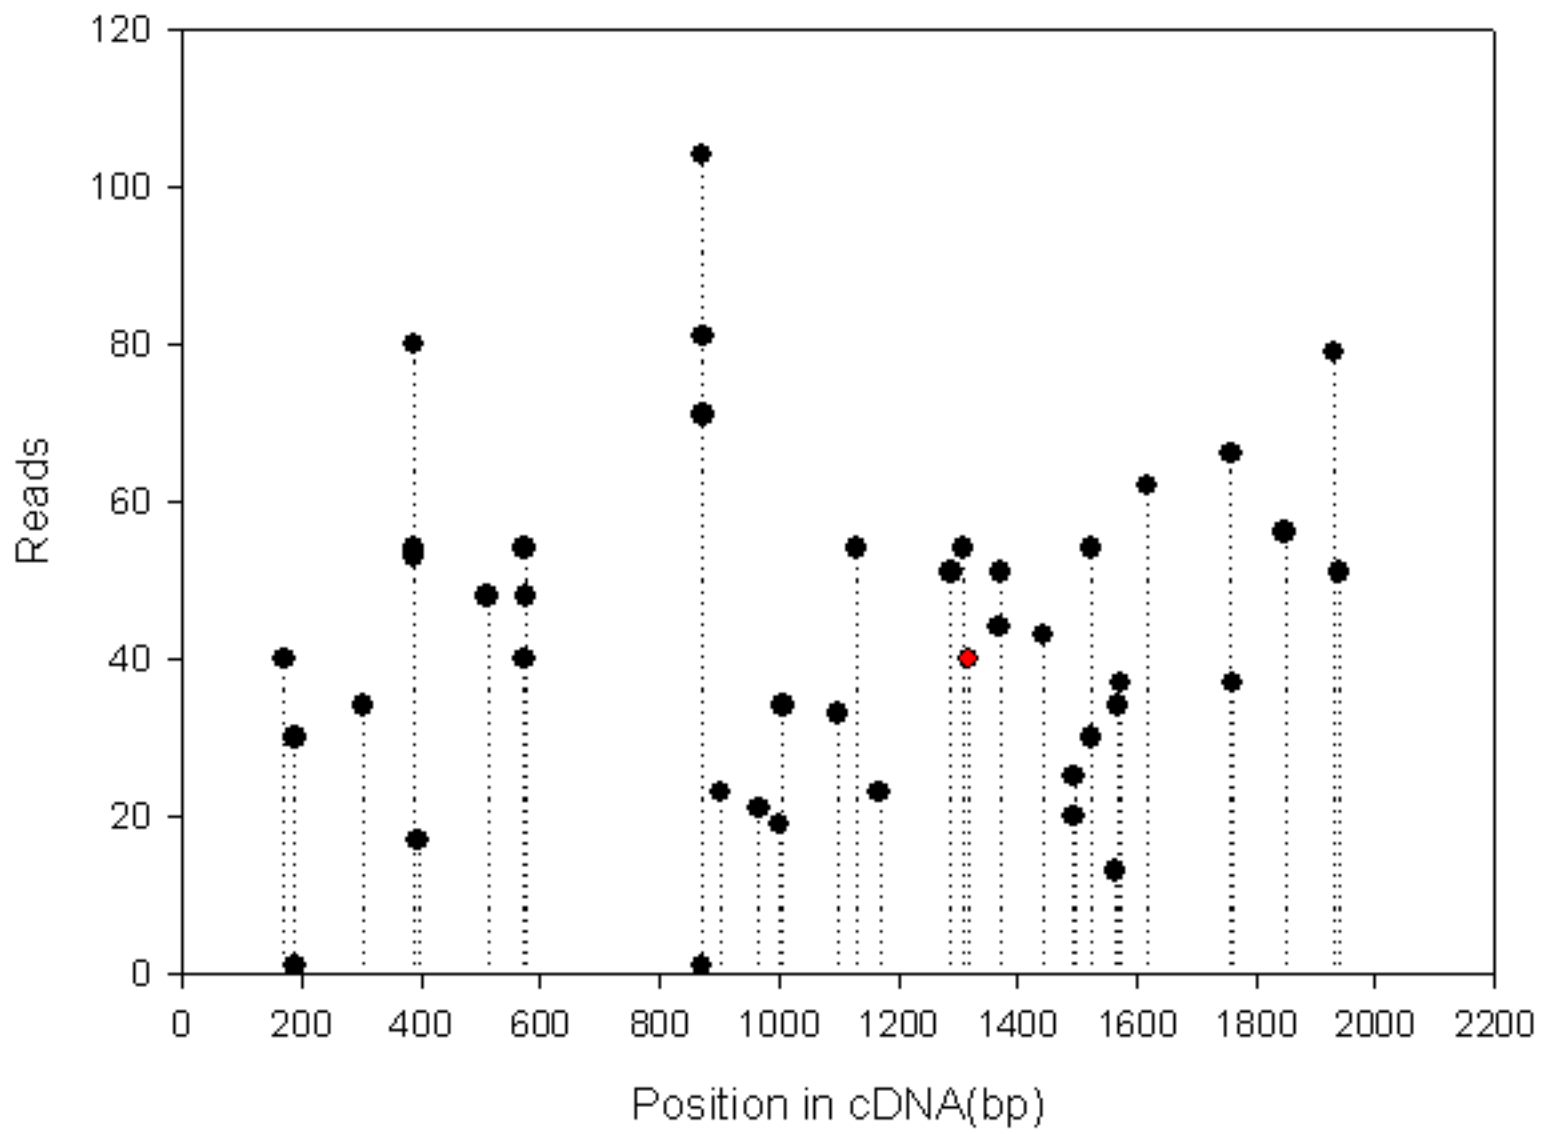

```

5'  GUCAUCAGCUCUUGAGGGAGAGAGCA  3'           Cs3g10900.1
      :  :  :  :  :  :  :  :  :  :  :
3'  --CUCUUCGGGAACUCCCUCUCA---  5'           Csi-miR477b.2

```

Csi-miR477d.2-5p, target=Cs3g10900.1 gene=Cs3g10900  
 Category:3  
 Score=3.5  
 Cleavage Site=1317

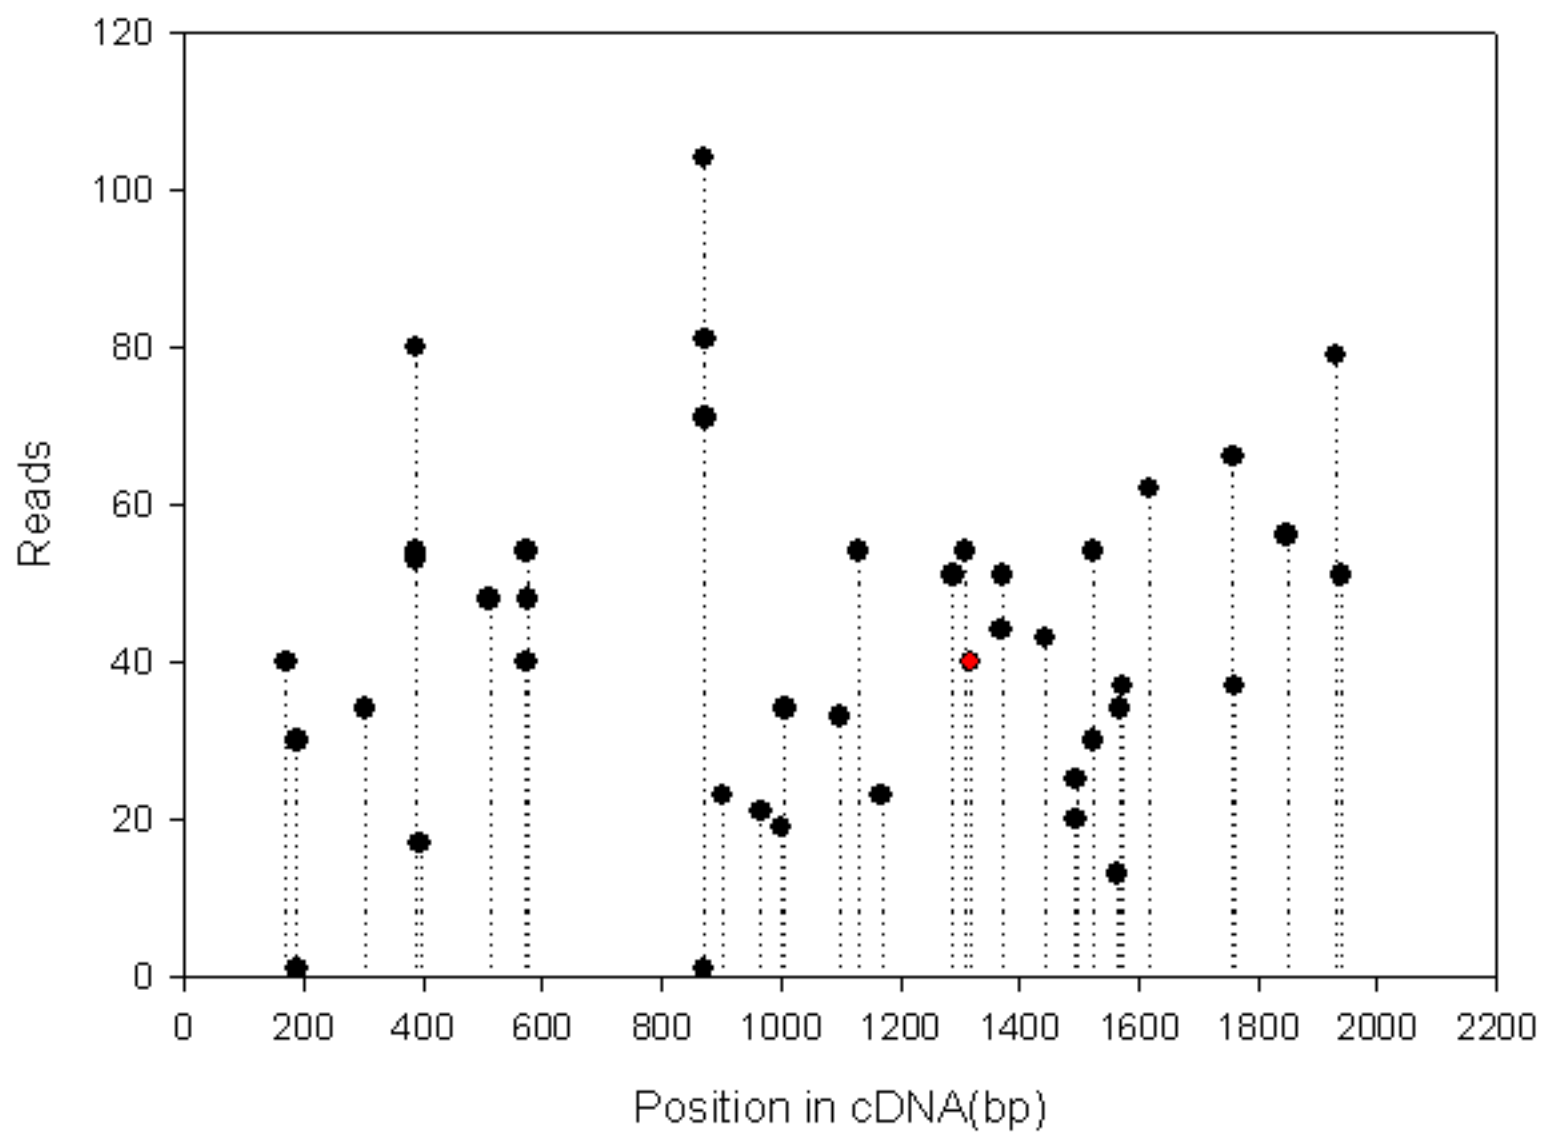

```

5'  GUCAUCAGCUCUUGAGGGAGAGAGCA  3'      Cs3g10900.1
    :::  ::::::::::::::::::::
3'  -AGUCUUCGGGAACUCCCUCUCA---  5'      Csi-miR477d.2-5p
  
```



Csi-miR482a-3p, target=Cs1g15550.1 gene=Cs1g15550  
 Category:1  
 Score=3  
 Cleavage Site=719

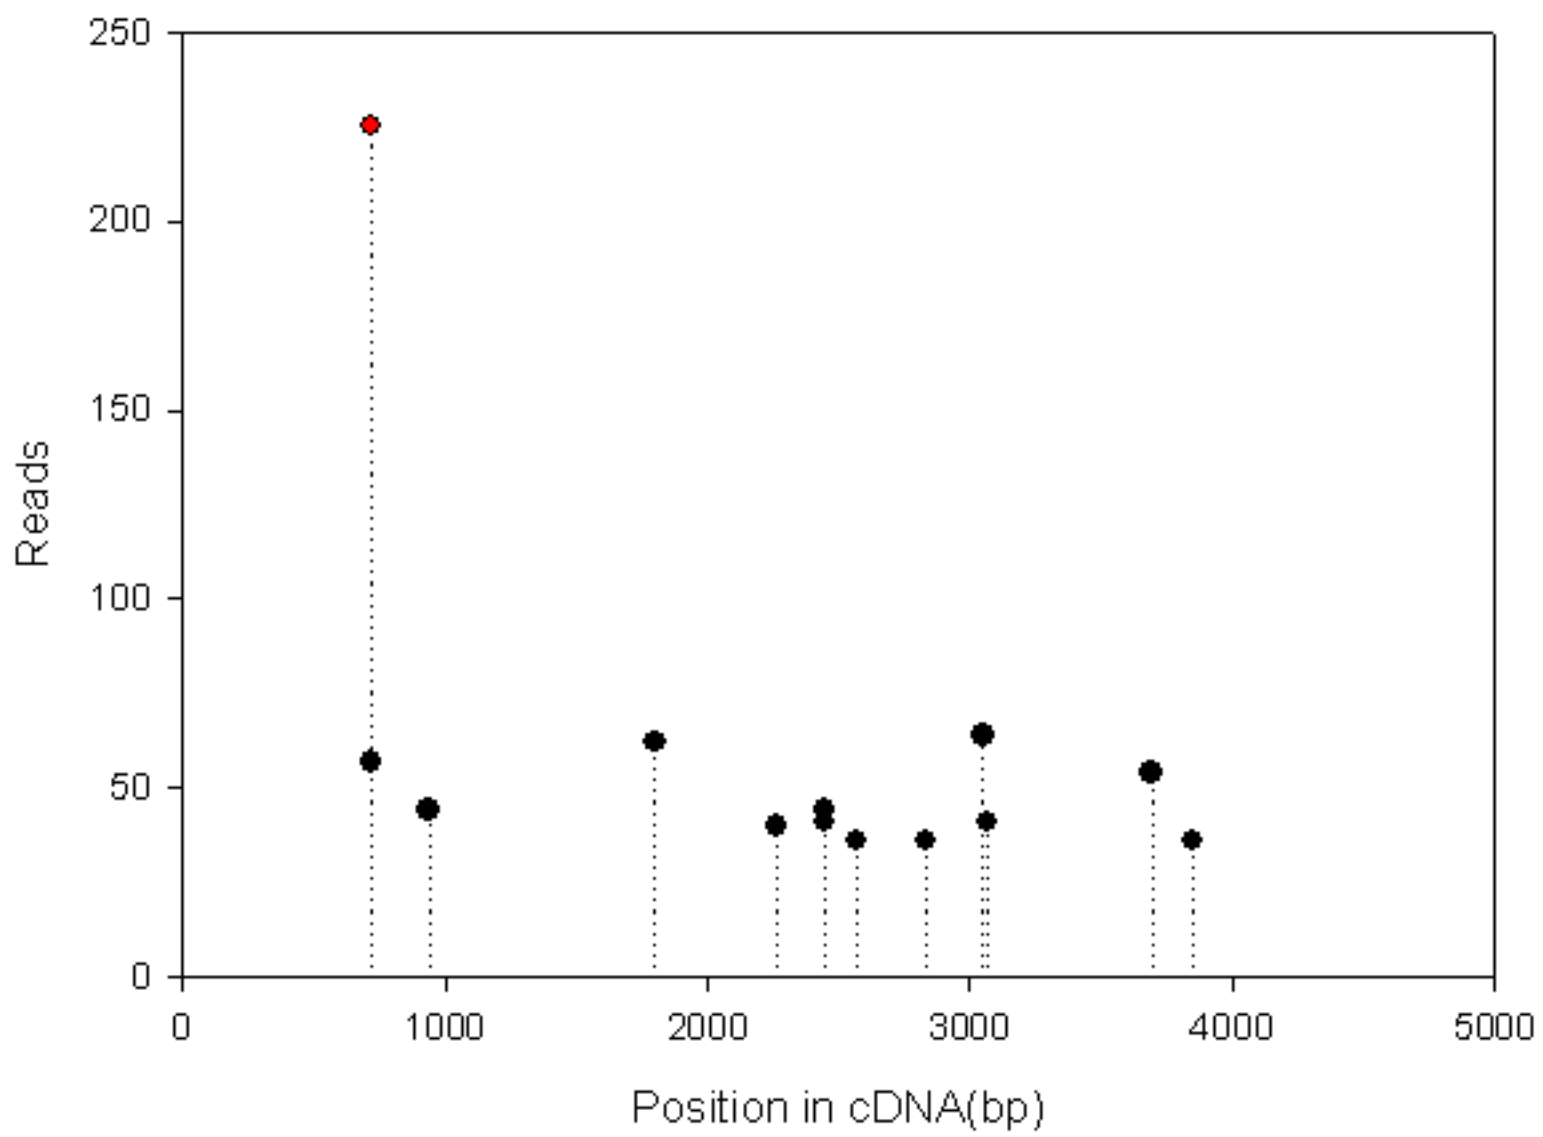

```

5' GGUAUGGGCGGUAUAGGGAAGACAAC 3'      Cs1g15550.1
   :: : : : : : : : : : : : : : :
3' CCUUACCCUCCGUAUCCCUUCU----- 5'    Csi-miR482a-3p
  
```

Csi-miR482a-3p, target=Cs3g13320.1 gene=Cs3g13320  
 Category:1  
 Score=5  
 Cleavage Site=643



|                                 |                |
|---------------------------------|----------------|
| 5' GGGAUGGGGGGCAUAGGCAAACUAC 3' | Cs3g13320.1    |
| .....: : :                      |                |
| 3' CCUACCCUCCGUAUCCCUUCU---- 5' | Csi-miR482a-3p |

Csi-miR482a-3p, target=Cs3g13340.1 gene=Cs3g13340  
 Category:2  
 Score=5  
 Cleavage Site=702



5' GGG AUGGGGGGCAUAGGCAAACUAC 3'  
 .....  
 3' CCUACCCUCCGUAUCCCUUCU---- 5'

Cs3g13340.1

Csi-miR482a-3p

Csi-miR482a-3p, target=Cs3g13390.1 gene=Cs3g13390  
 Category:1  
 Score=5  
 Cleavage Site=800

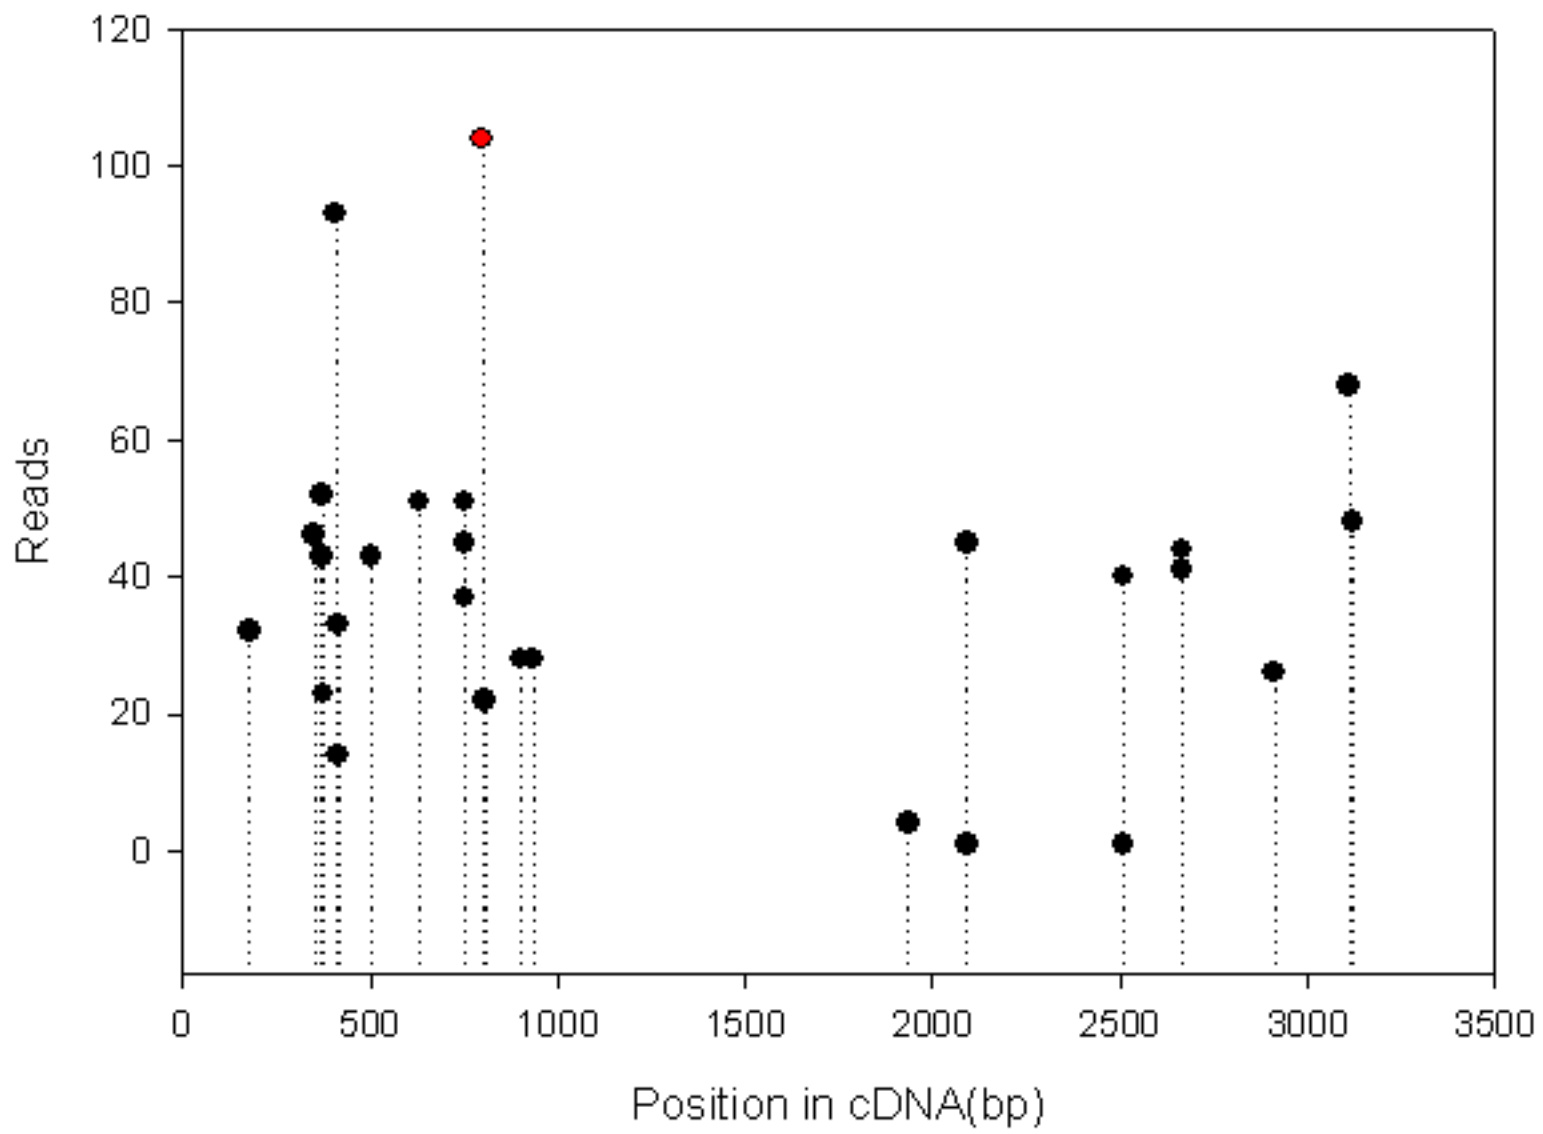

```

5' GGGAUGGGGGGCAUAGGCAAACUAC 3'
   :::::::::::::::::::: ::
3' CCUACCCUCCGUAUCCCUUCU---- 5'
  
```

Cs3g13390.1

Csi-miR482a-3p

Csi-miR482a-3p, target=Cs3g13740.1 gene=Cs3g13740  
 Category:2  
 Score=5  
 Cleavage Site=686

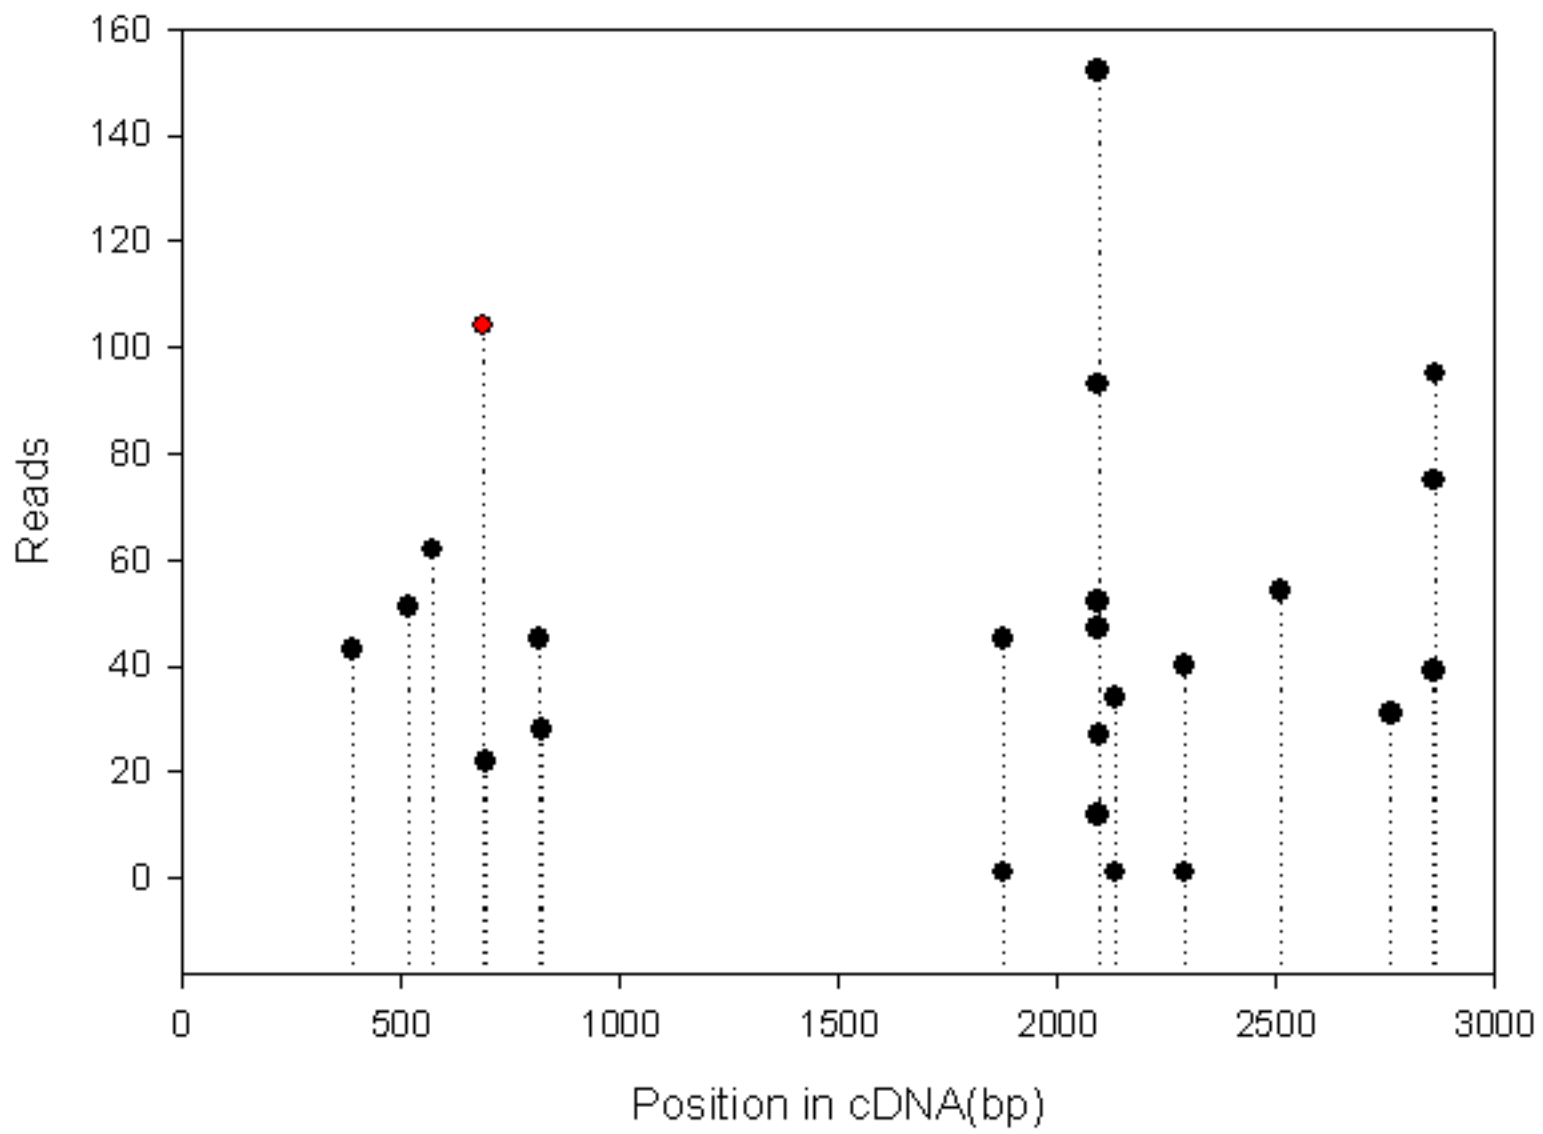

5' GGGAUAGGGGGGCAUAGGCAAACUAC 3'  
 :::::::::::::::::::: :: :  
 3' CCUACCCUCCGUAUCCCUUCU---- 5'

Cs3g13740.1  
 Csi-miR482a-3p

Csi-miR482a-3p, target=Cs5g19440.1 gene=Cs5g19440  
 Category:1  
 Score=4  
 Cleavage Site=364



5' GGUAUGGGAGGUAAUAGGUAAGACAAC 3'  
 :: :::::::::::::::::::: :::::  
 3' CCUUACCCUCCGUAUCCCUUCU---- 5'

Cs5g19440.1

Csi-miR482a-3p

Csi-miR482a-3p, target=Orange1.1t01829.1 gene=Orange1.1t01829  
 Category:1  
 Score=4  
 Cleavage Site=810

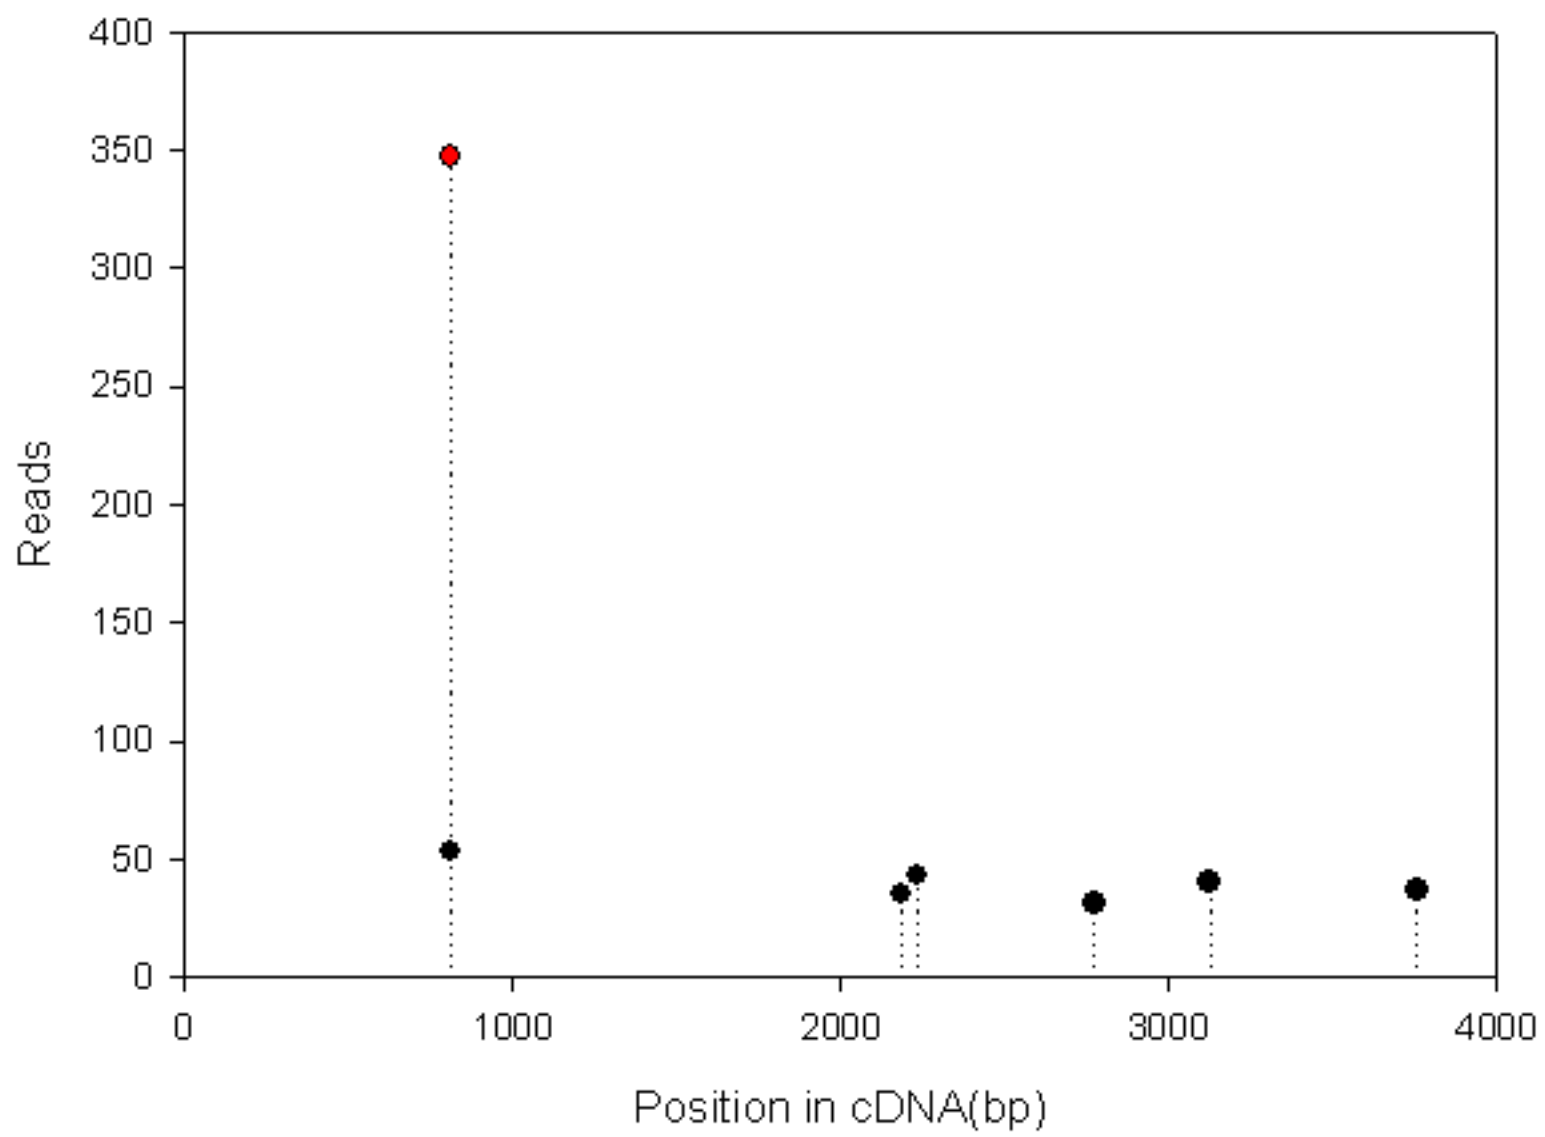

```

5' GGUAUGGGAGGUUAUAGGUAAGACAAC 3'
   :: :::::::::::::::::::: ::::
3' CCUUAACCCUCCGUAUCCCUUCU----- 5'
  
```

Orange1.1t01829.1

Csi-miR482a-3p

Csi-miR482a-3p, target=Orange1.1t01918.1 gene=Orange1.1t01918  
 Category:1  
 Score=4  
 Cleavage Site=562



5' GGUAUGGGAGGUUAUAGGGAAAACCAC 3'  
 :: ::::::::::: ::::::::::: ::  
 3' CCUACCCUCCGUAUCCCUUCU---- 5'

Orange1.1t01918.1

Csi-miR482a-3p





Csi-miR482b, target=Cs1g13430.1 gene=Cs1g13430  
 Category:1  
 Score=4  
 Cleavage Site=700



```

5' GGCAUGGGAGGGGUGGGUAAAACUAC 3'      Cs1g13430.1
   :: ::::::::::::::::::::: :
3' CCUUAACCCUCCCCACCCGUUCU----- 5'    Csi-miR482b

```

Csi-miR482d, target=Cs5g21975.1 gene=Cs5g21975  
 Category:3  
 Score=5  
 Cleavage Site=616

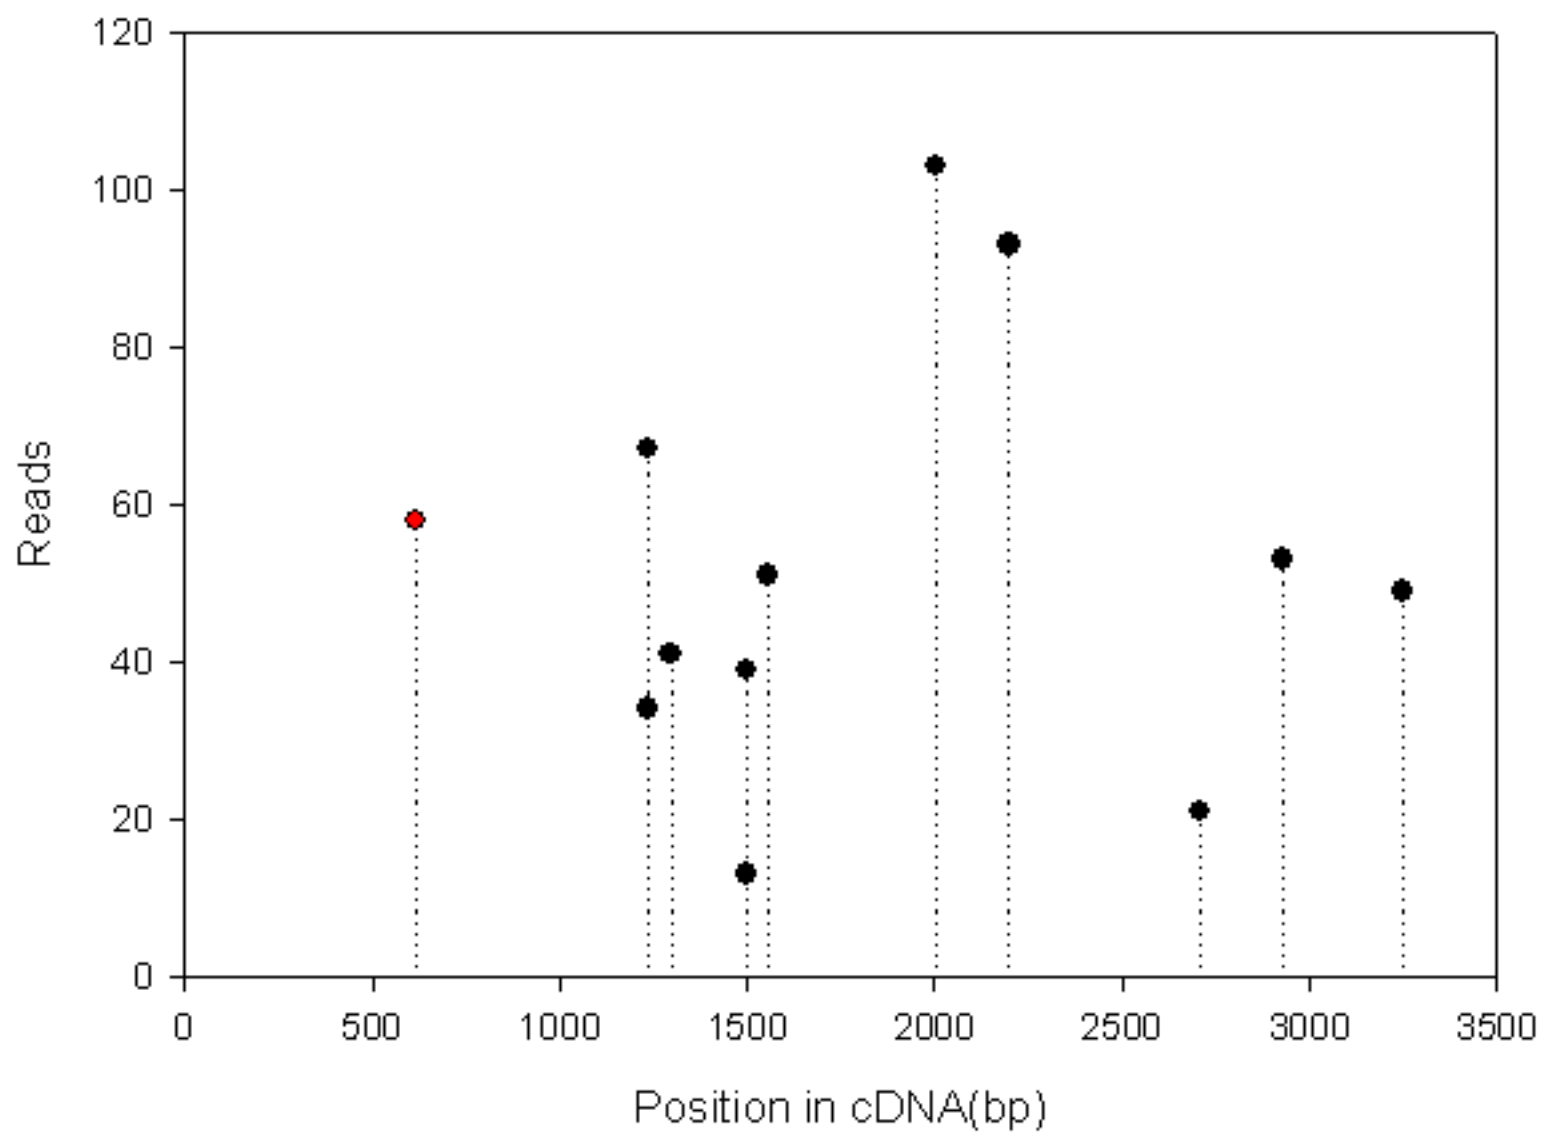

```

5' GGAUGGGUGGAAUAGGAAAGACUAU 3'      Cs5g21975.1
   :: :::::::::::::: :::: ::::
3' CCGUACCCACCUCAUCCCUUCU----- 5'    Csi-miR482d

```

Csi-miR482d-5p.1, target=Cs1g02710.1 gene=Cs1g02710  
 Category:3  
 Score=5  
 Cleavage Site=1347

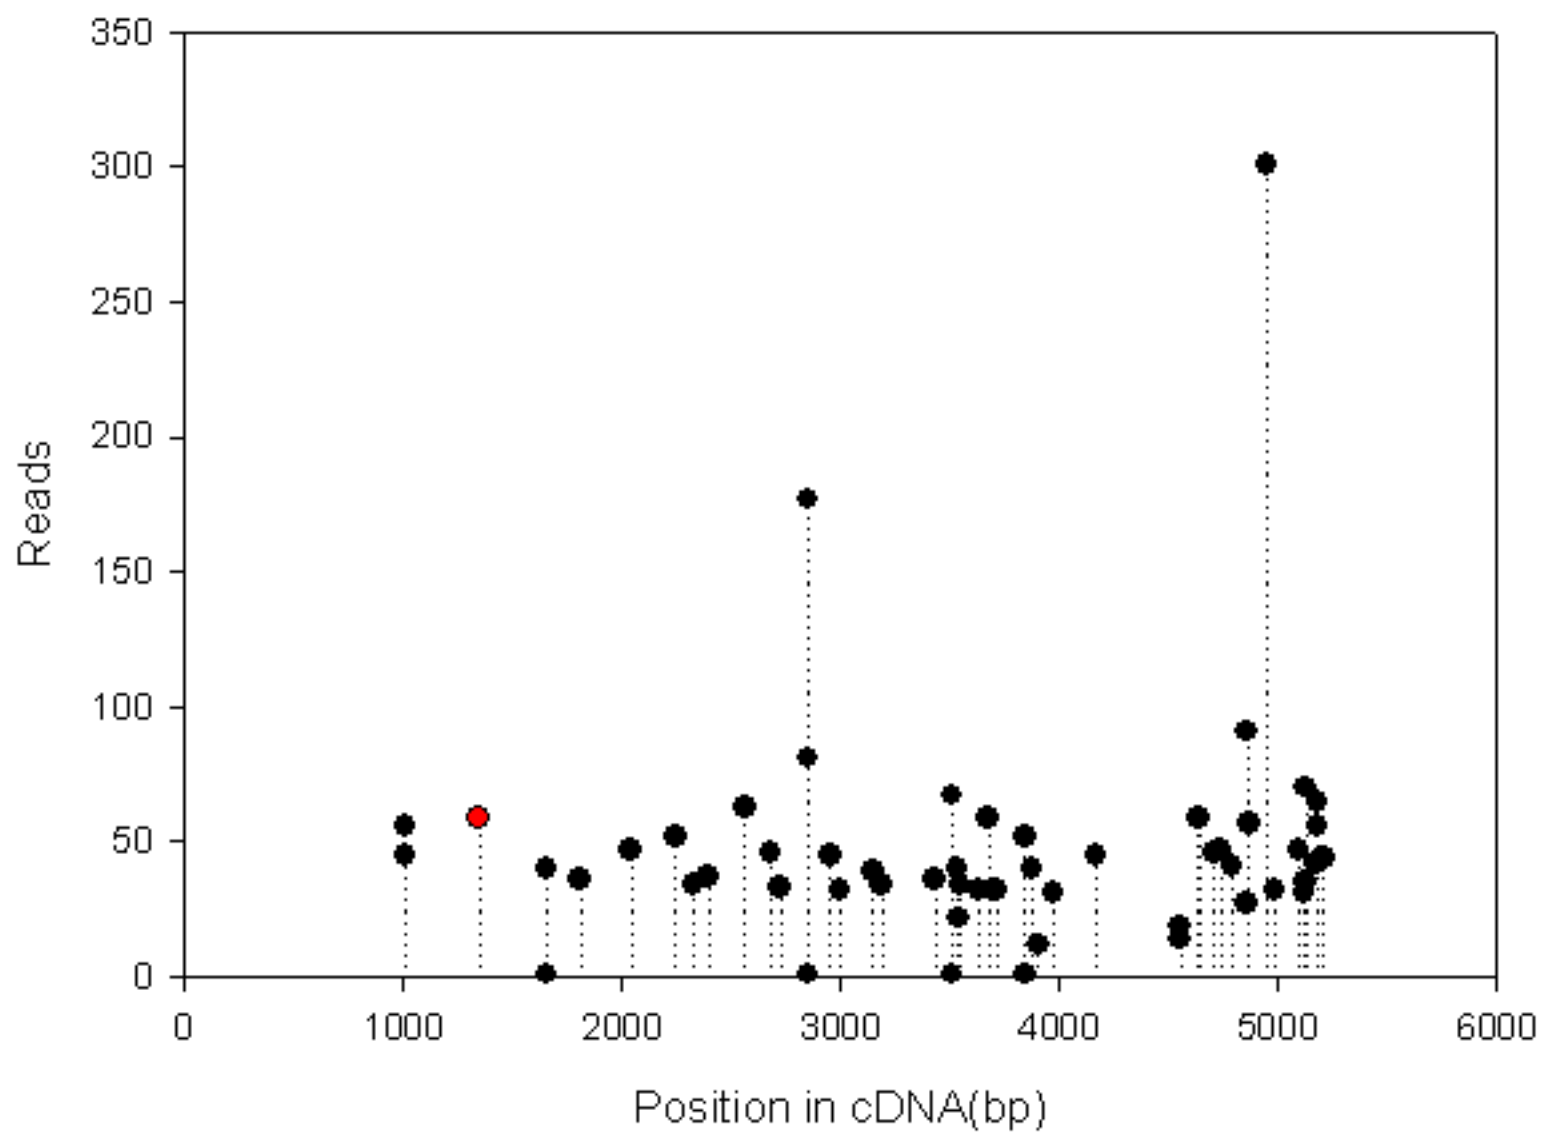

```

5' CUUUGAUUAUCUCACCUAUACCGAAAG 3'          Cs1g02710.1
   ::::  :: :::::::.....
3' GAAGGGAU-GAGUGGGUAUGGU----- 5'        Csi-miR482d-5p.1

```

Csi-miR5054.2, target=Cs2g09030.1 gene=Cs2g09030  
 Category:2  
 Score=5  
 Cleavage Site=2215

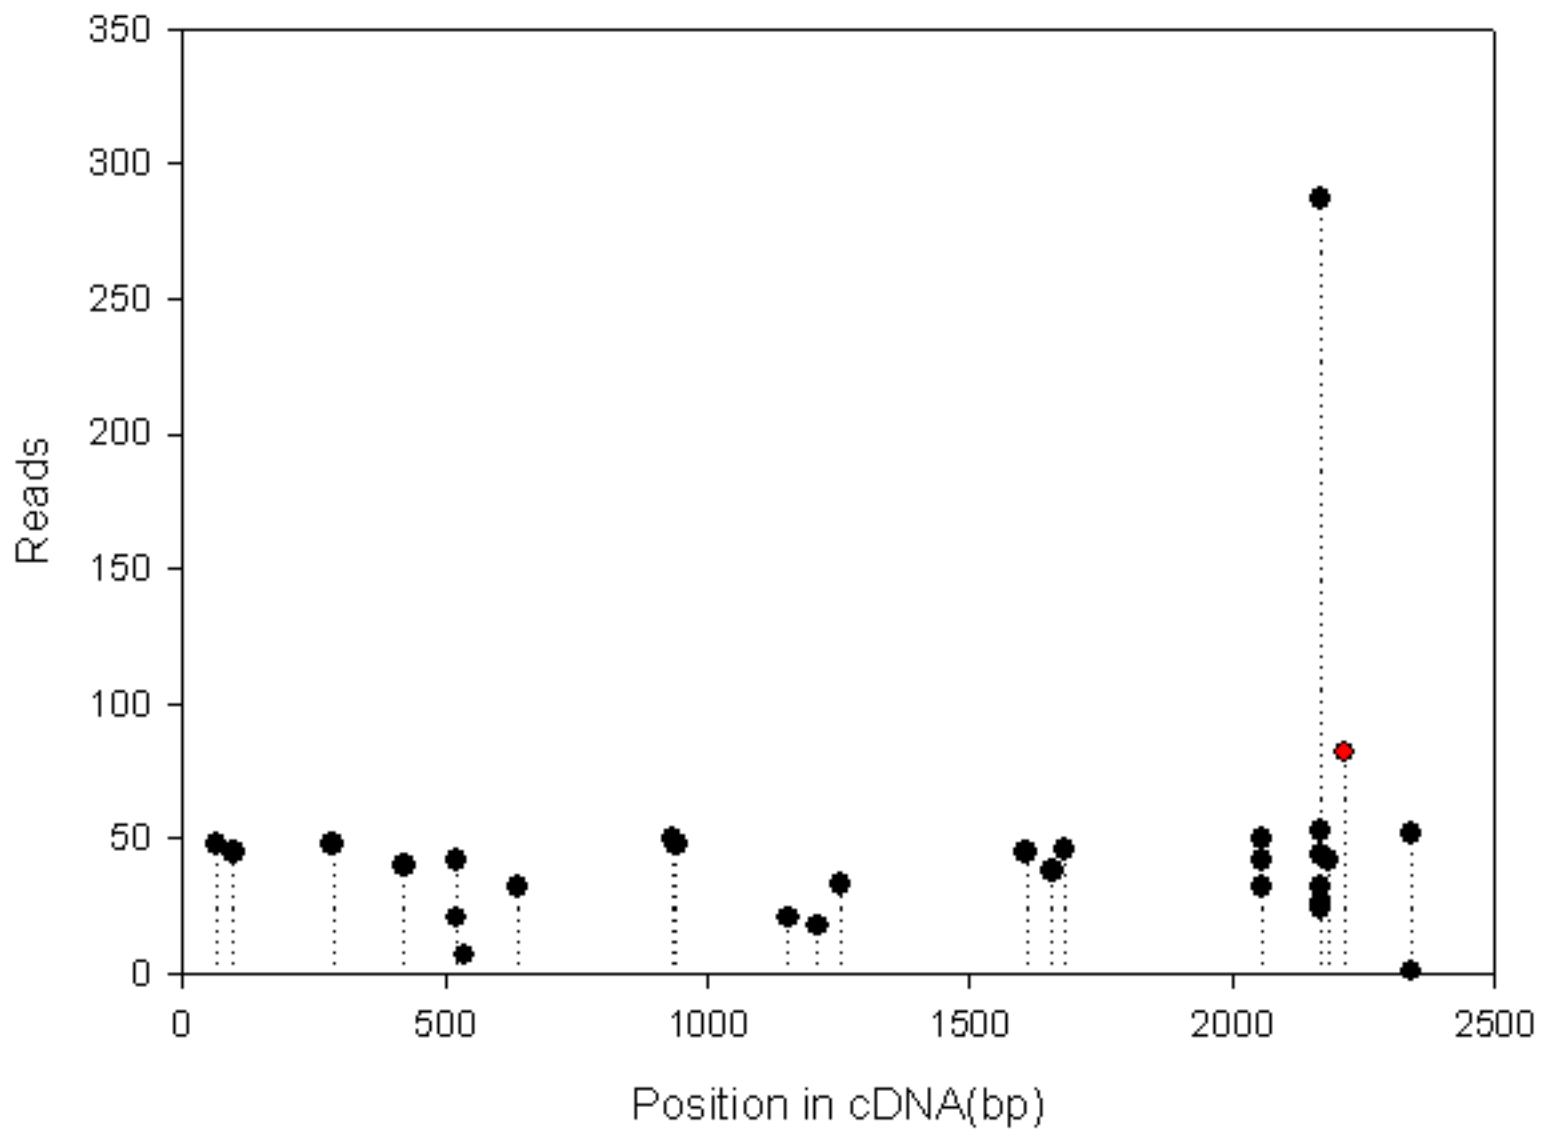

```

5' CUGUAUUGUUGUCGUUUGU-GGGAACC 3'      Cs2g09030.1
   :: .....:: :::::
3' -----ACCGCGGCAGACACCCUUG- 5'      Csi-miR5054.2
  
```

Csi-miR530b, target=Cs4g14880.1 gene=Cs4g14880  
 Category:3  
 Score=4.5  
 Cleavage Site=631

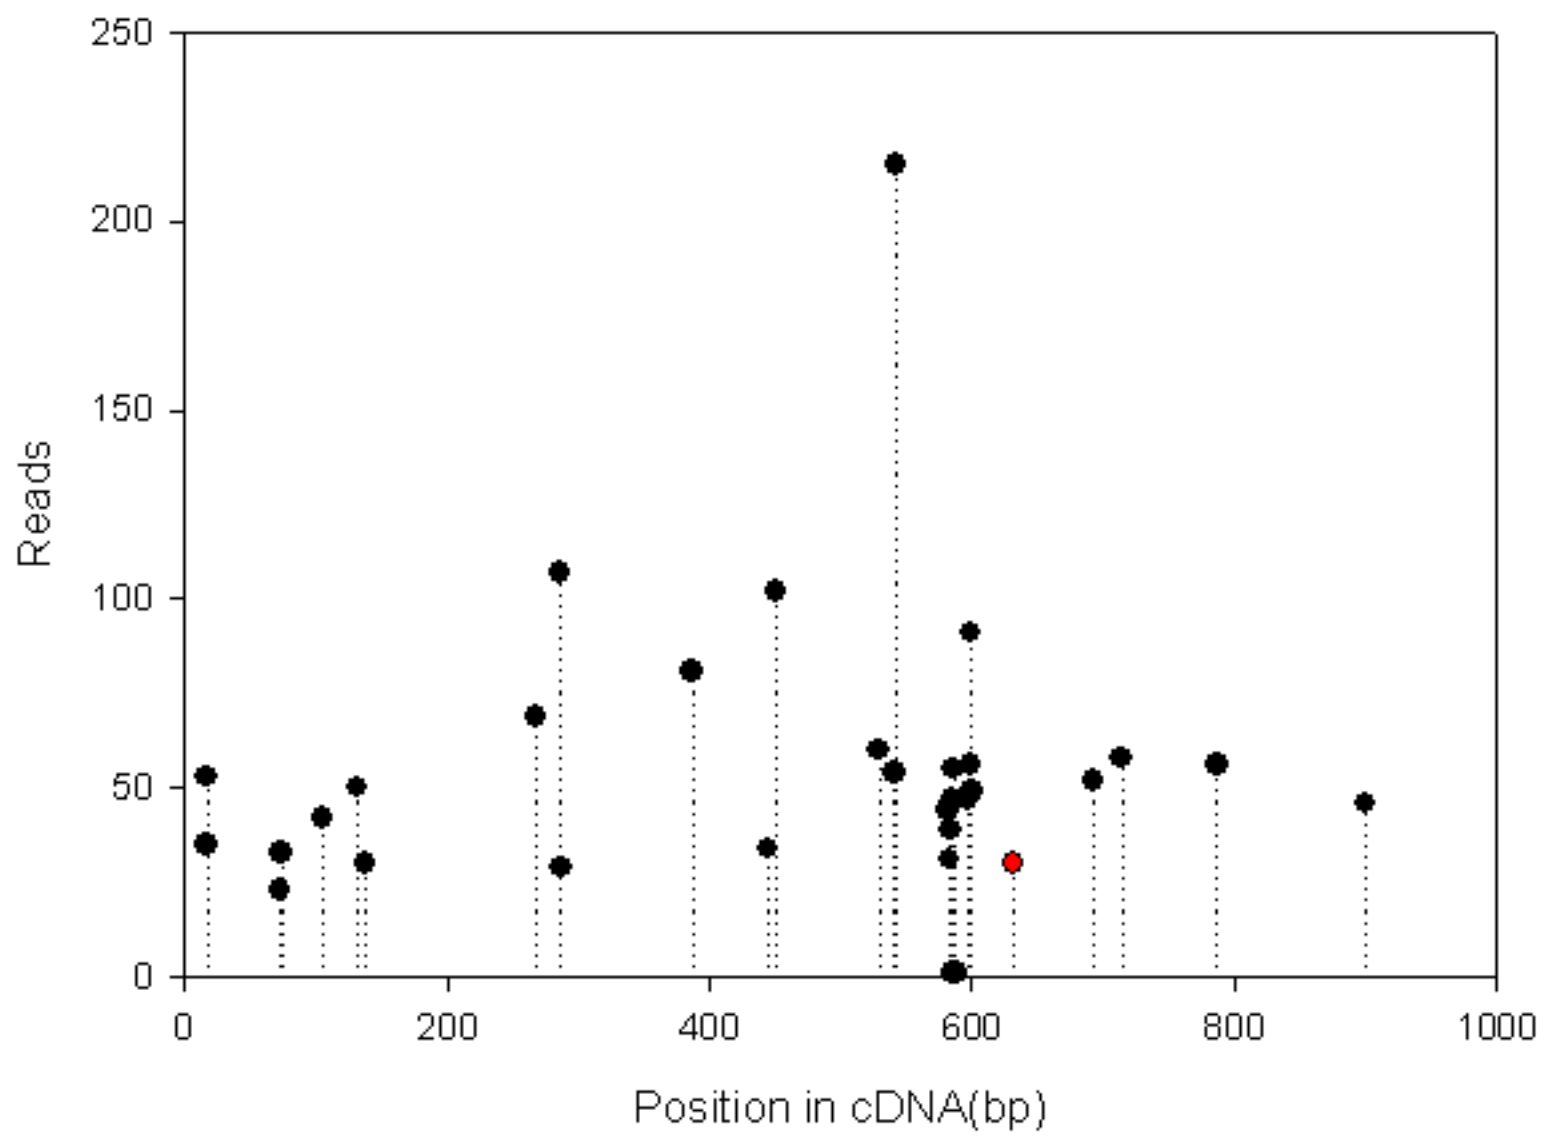

```

5' CGAGA UCCAGAUGCAA AUGCUUUAGA 3'      Cs4g14880.1
   :.:.:.:.: :.:.: :.:.:.:.:.:.:.:
3' GUUCUACGUCCACGUUUACGU----- 5'      Csi-miR530b

```

Csi-miR530b, target=Cs6g11650.1 gene=Cs6g11650  
 Category:3  
 Score=5  
 Cleavage Site=261

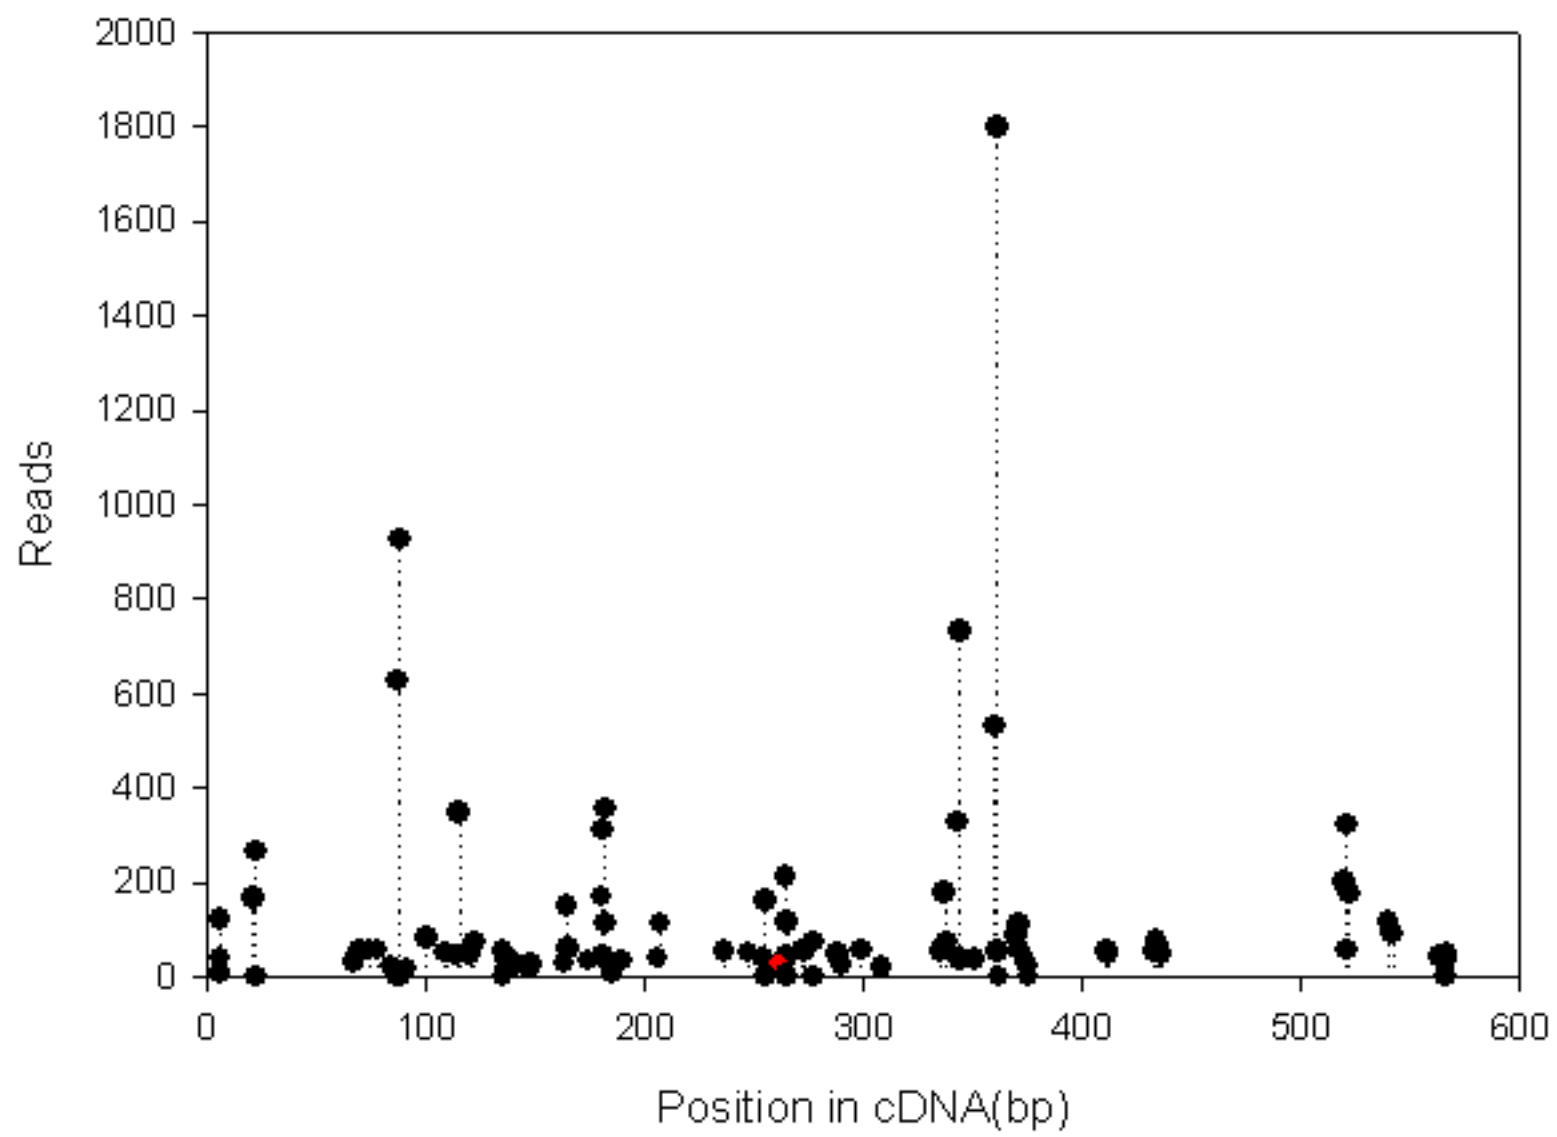

```

5' GGAGAUUCAGGUGCGAAUGUGAAGAG 3'      Cs6g11650.1
   . . . . . : : : : : . . . . .
3' GUUCUACGUCCACGUUUACGU----- 5'    Csi-miR530b
  
```

Csi-miR535.2, target=Cs7g11770.1 gene=Cs7g11770  
 Category:1  
 Score=5  
 Cleavage Site=1487

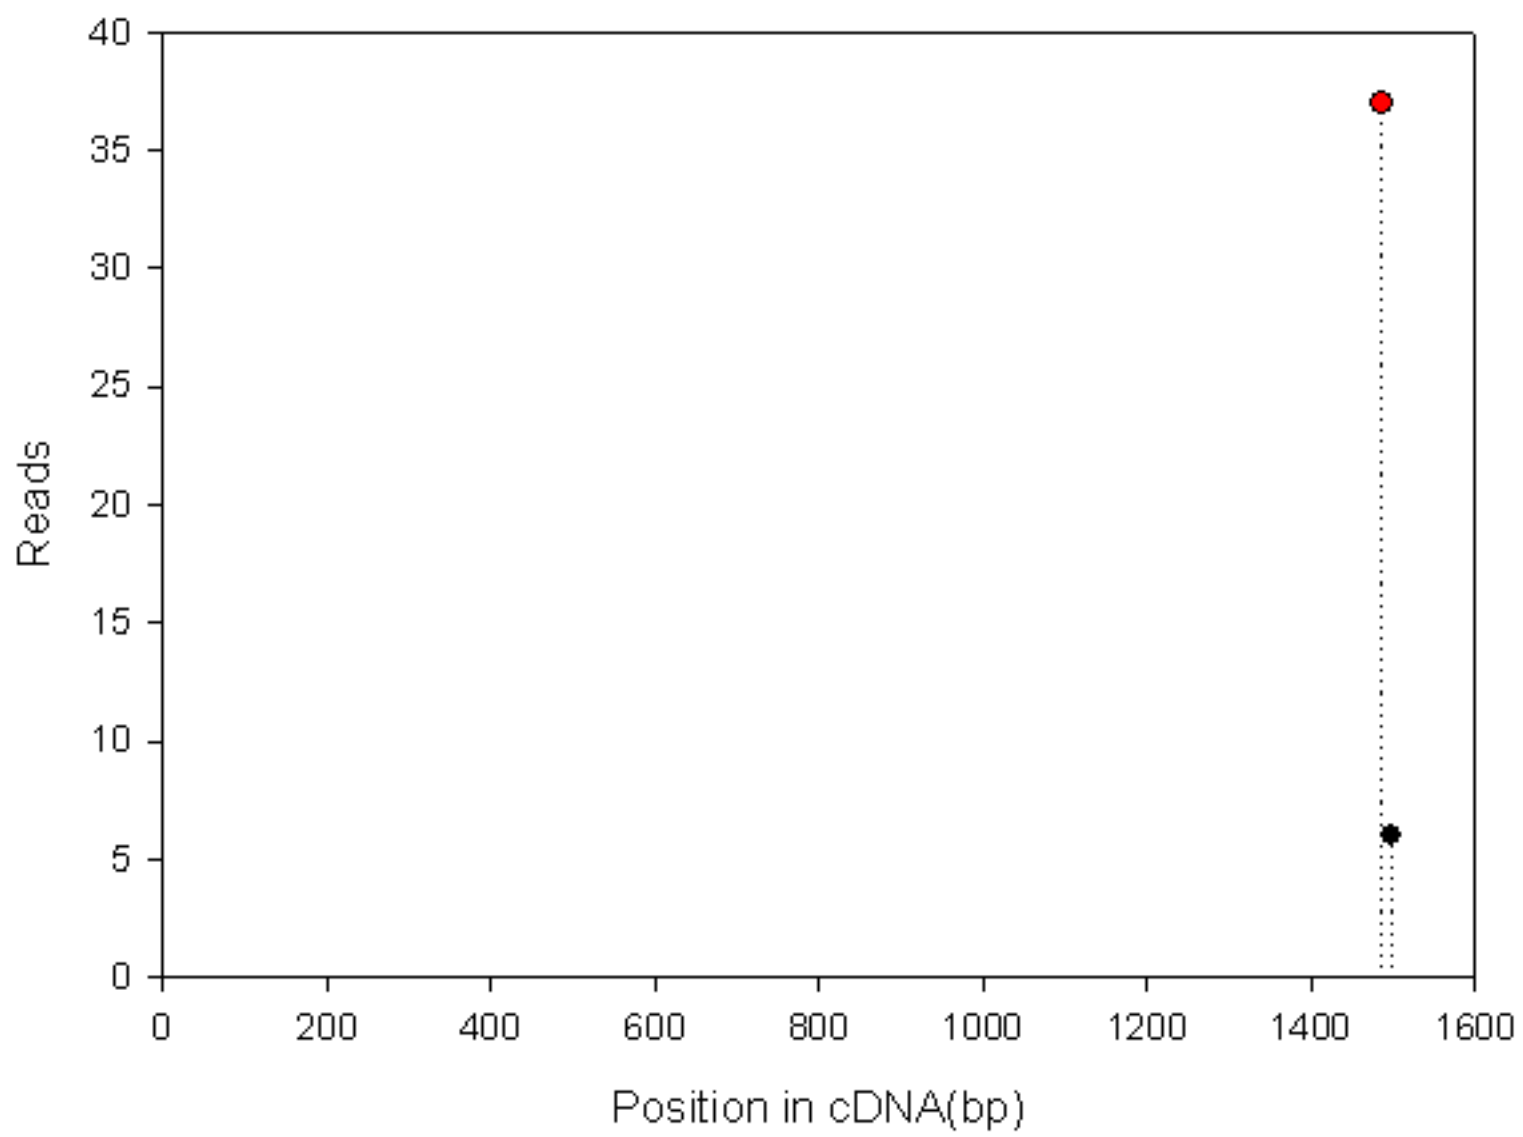

```

5' UGGUGCUCUCUCUCUUCUGUCAGCUC 3'      Cs7g11770.1
   ::::::::::: : :::::
3' -ACACGAGAGAGAGUA-ACAGU----- 5'      Csi-miR535.2
  
```



Csi-miR535.2, target=Orange1.1t04075.1 gene=Orange1.1t04075  
 Category:3  
 Score=5  
 Cleavage Site=716

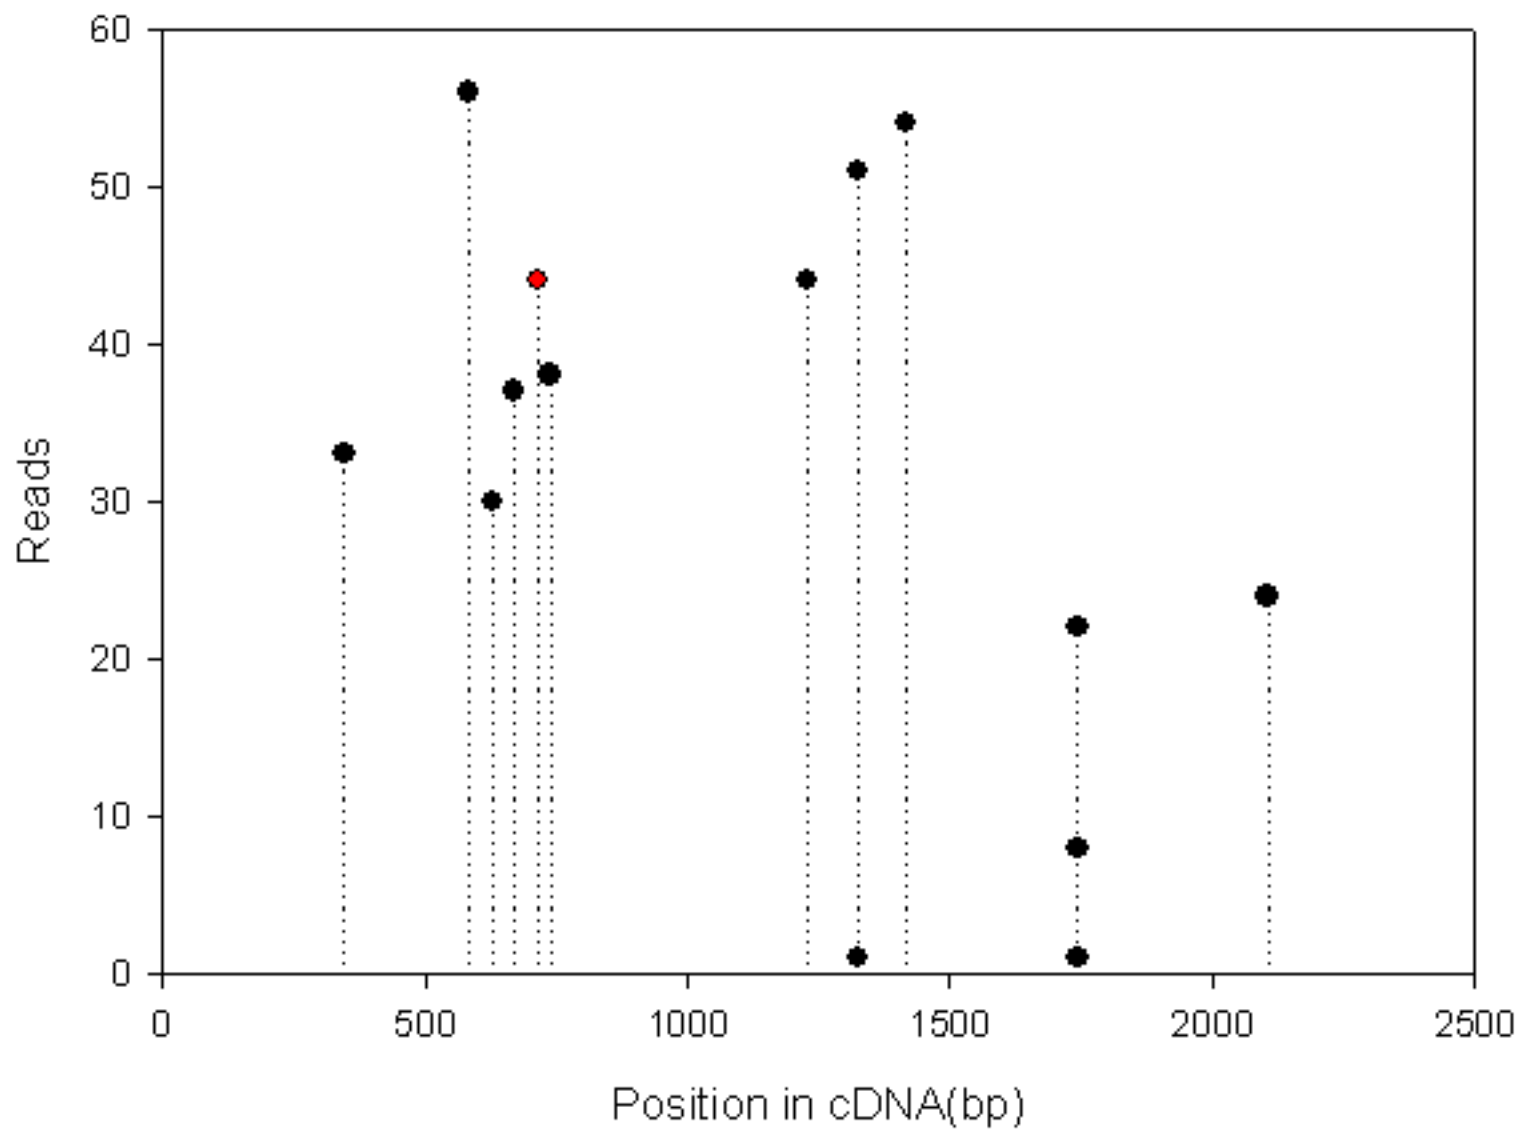

```

5' UUUUGAUCUCUCUUCGUUGUCAGAAA 3'      Orange1.1t04075.1
   :  :  :  :  :  :  :  :  :  :  :
3' -ACACGAGAGAG-AGUAACAGU----- 5'    Csi-miR535.2
  
```

Csi-miR827.1, target=Cs5g10180.1 gene=Cs5g10180  
 Category:3  
 Score=1  
 Cleavage Site=241

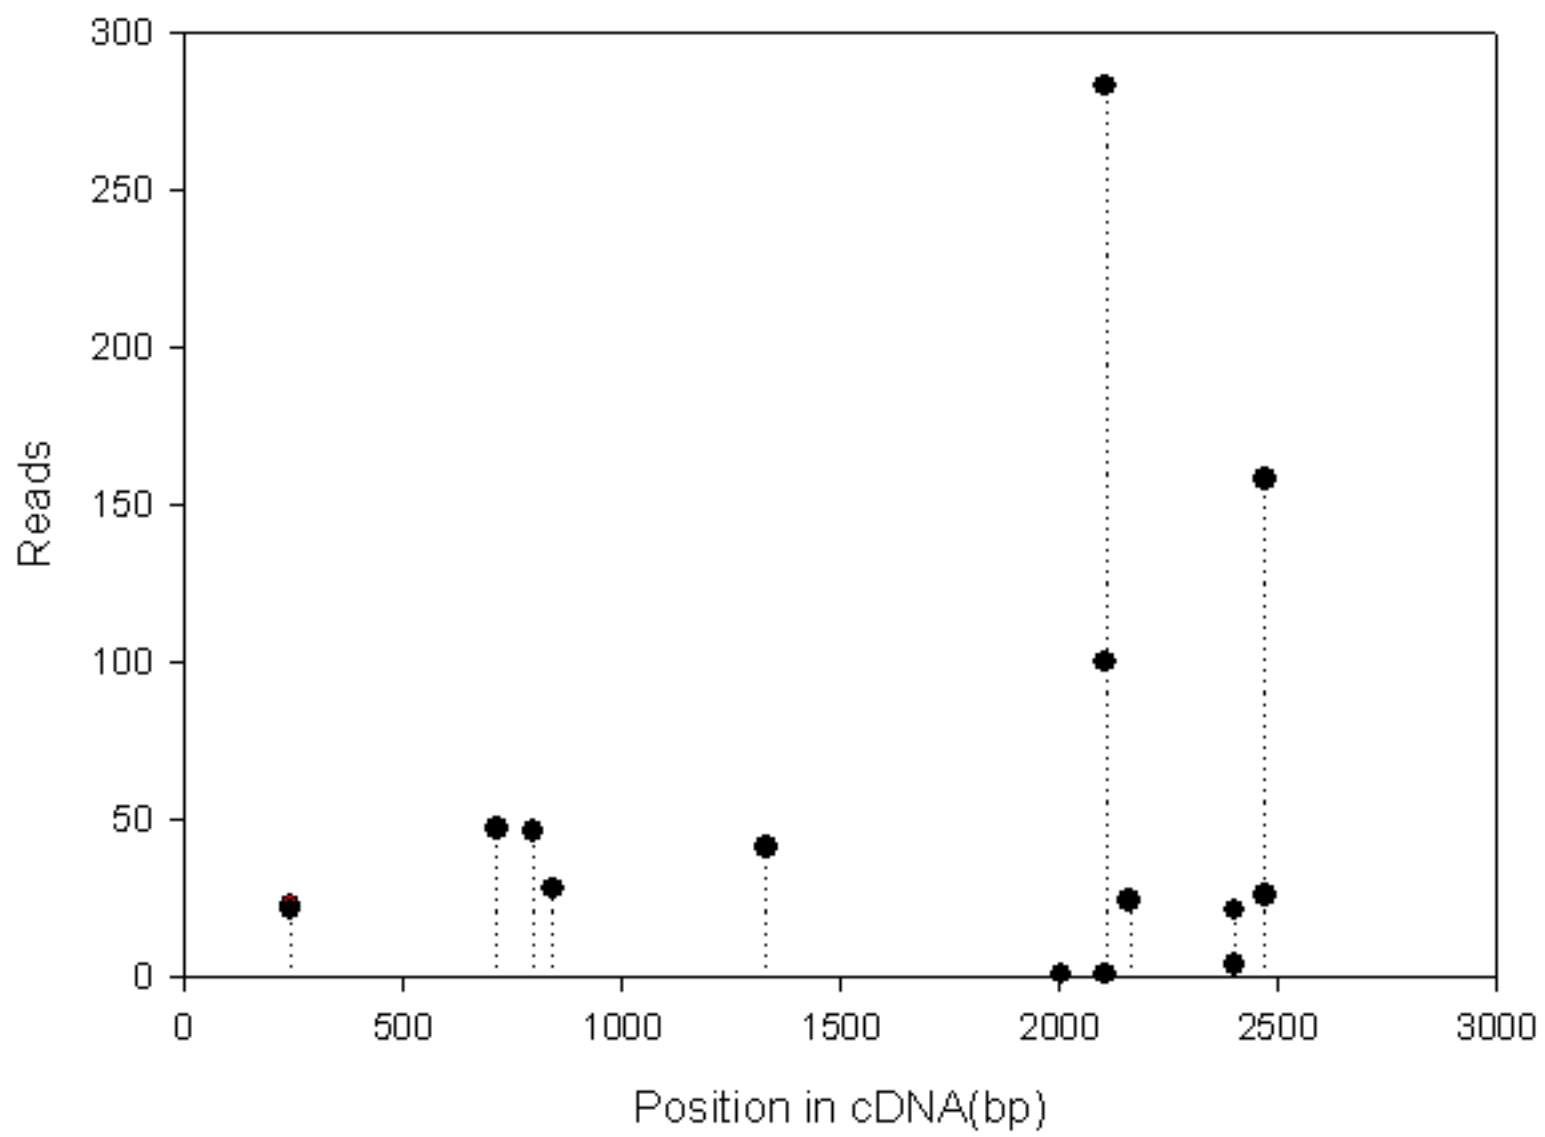

5' GUGUUCGUUGAUGGUCAUCUAAACUU 3'  
 :::: :::::::::::::::::::::  
 3' -ACAAACAACUACCAGUAGAUU---- 5'

Cs5g10180.1

Csi-miR827.1



Csi-miR827-5p.1, target=Cs1g24800.1 gene=Cs1g24800  
 Category:3  
 Score=3.5  
 Cleavage Site=2093

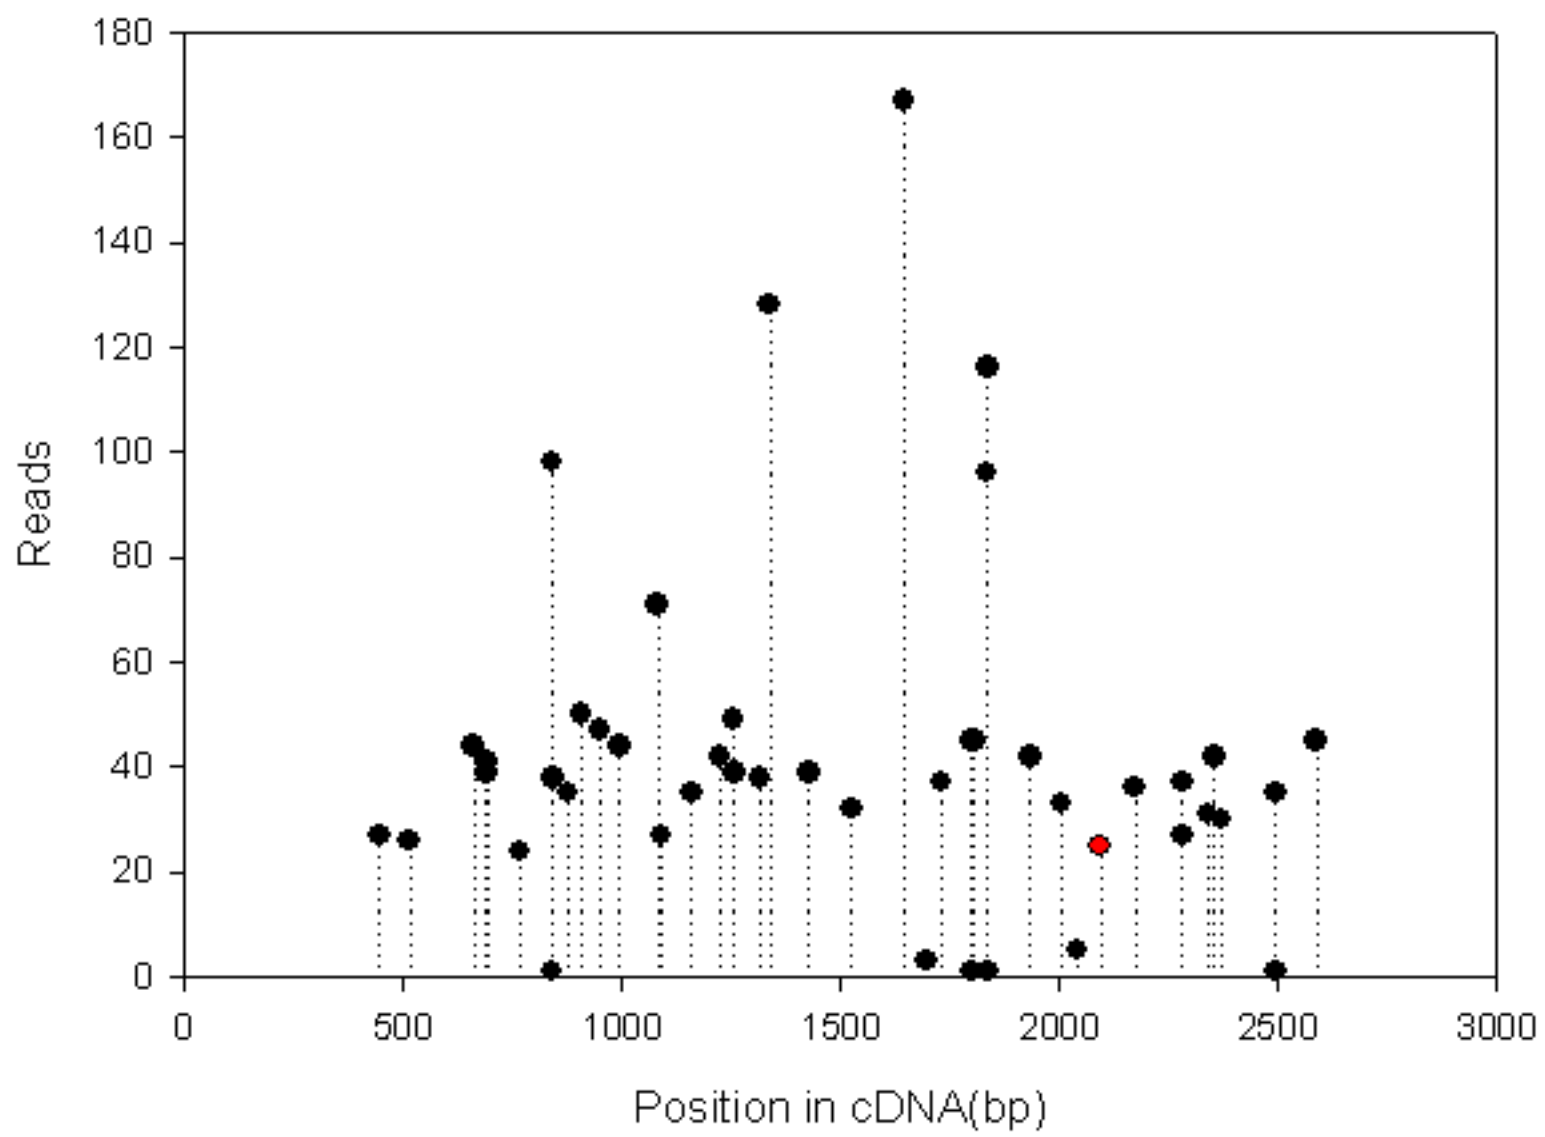

```

5' AUUGCAGAGUGCAUGACAAUCAACAAA 3'      Cs1g24800.1
   :: :. ::::::::::::::::::::
3' -----CUAAUCUACUGUUAGUUGUUC 5'      Csi-miR827-5p.1
  
```

Csi-miR827-5p.2, target=Cs8g15030.1 gene=Cs8g15030  
 Category:2  
 Score=5  
 Cleavage Site=963

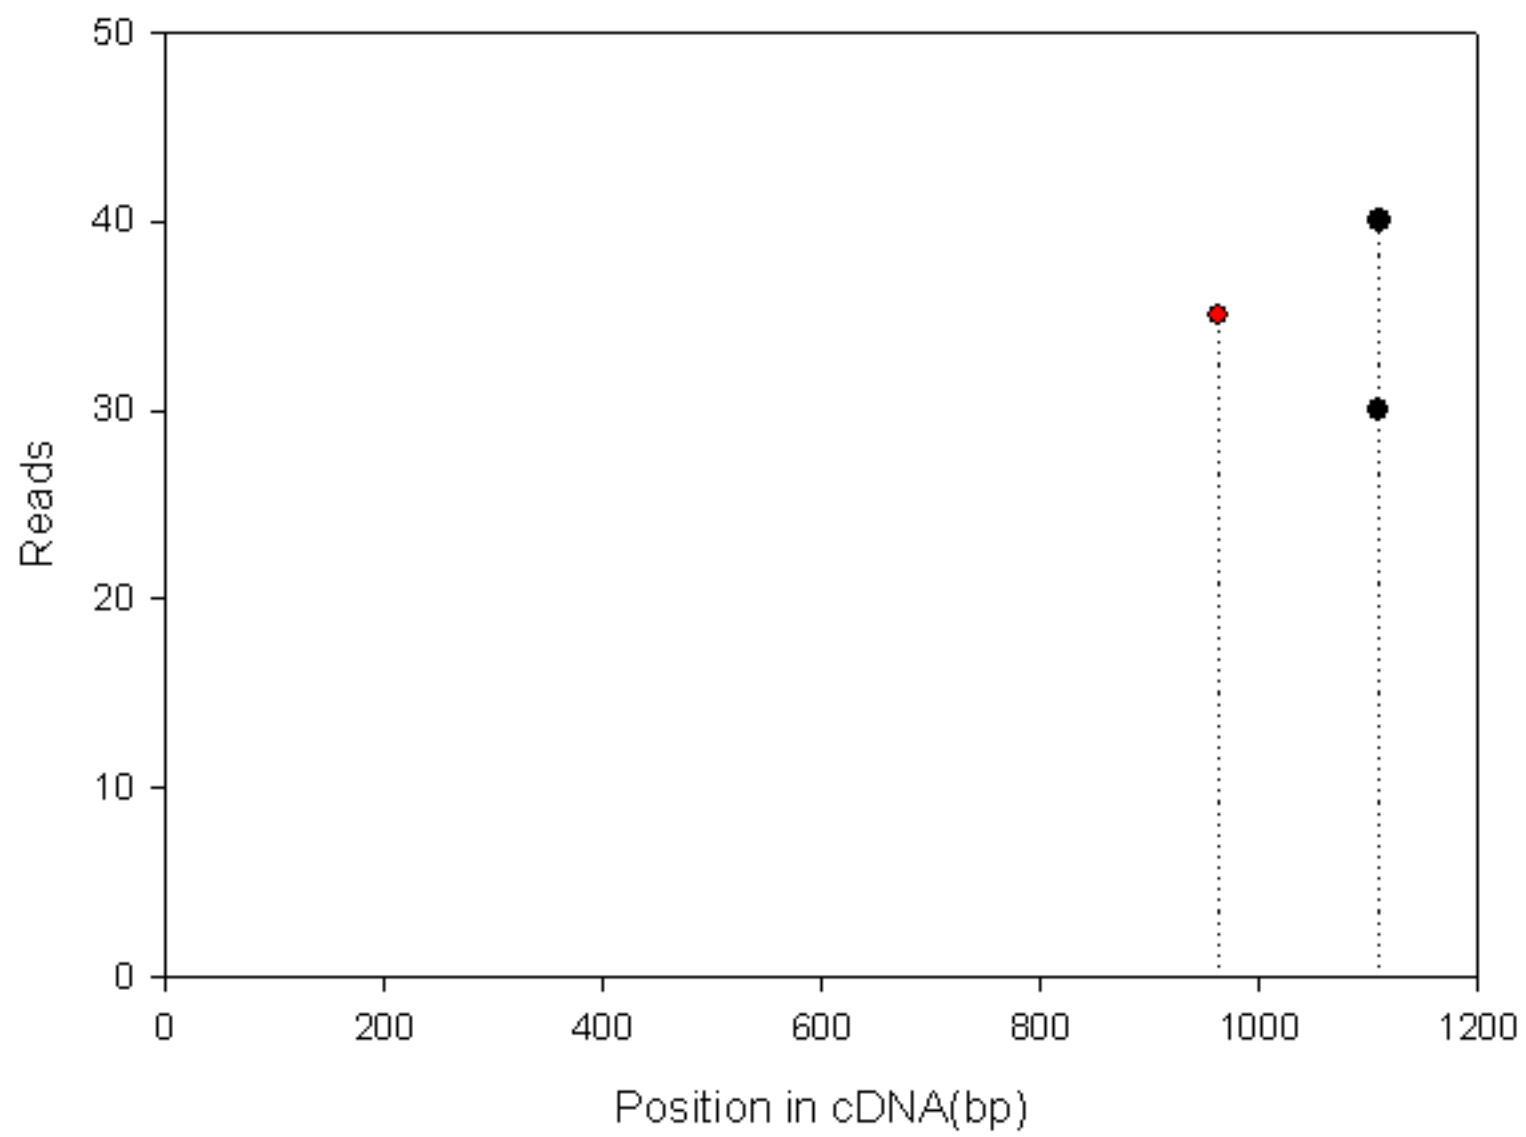

|                                    |                 |
|------------------------------------|-----------------|
| 5' UUAGAGGACGAUCAAC-GGCACAUUAUC 3' | Cs8g15030.1     |
| .....:.....:.....                  |                 |
| 3' AAUCUACUGUAGUUGUUCGU----- 5'    | Csi-miR827-5p.2 |

Csi-miR828, target=Orange1.1t00180.1 gene=Orange1.1t00180  
 Category:3  
 Score=5  
 Cleavage Site=652

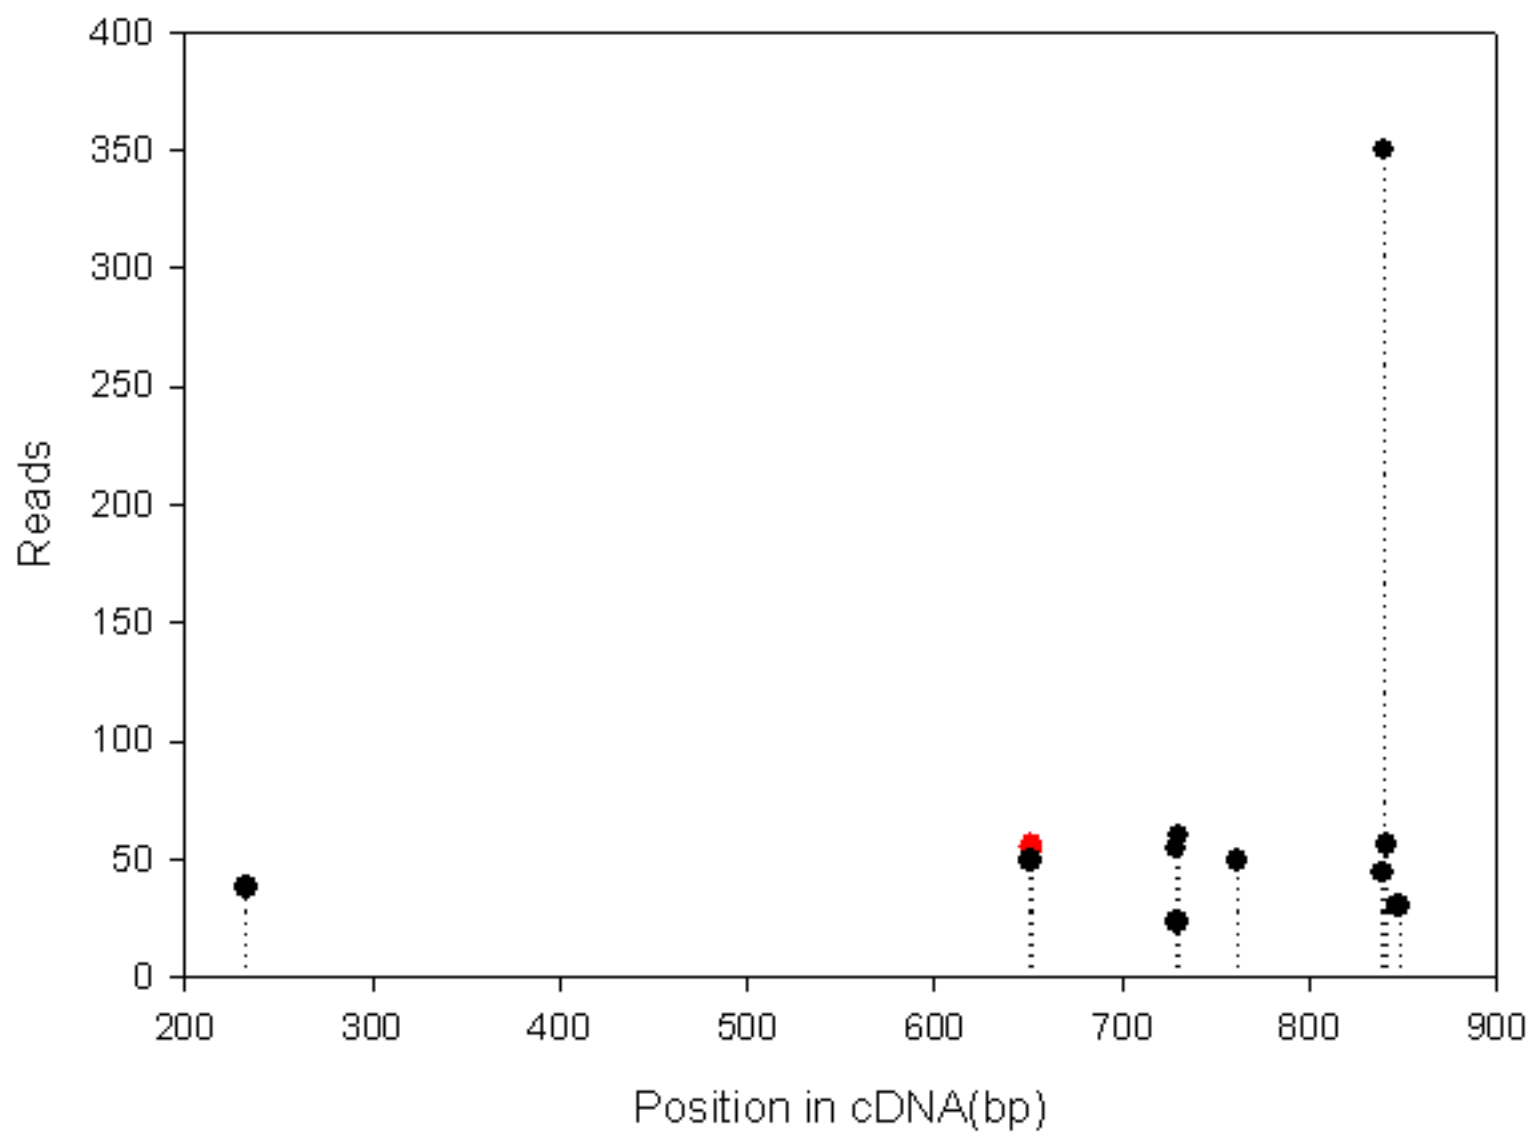

```

5' AGCUACUUG-CUAAAUGGGUAUGCUCU 3'      Orange1.1t00180.1
   :  :  :  :  :  :  :  :  :  :  :
3' --GCAGAACGGAUUUACUCAUAG---- 5'      Csi-miR828
  
```

Csi-miR833.1, target=Cs5g27500.1 gene=Cs5g27500  
 Category: 1  
 Score=5  
 Cleavage Site=620

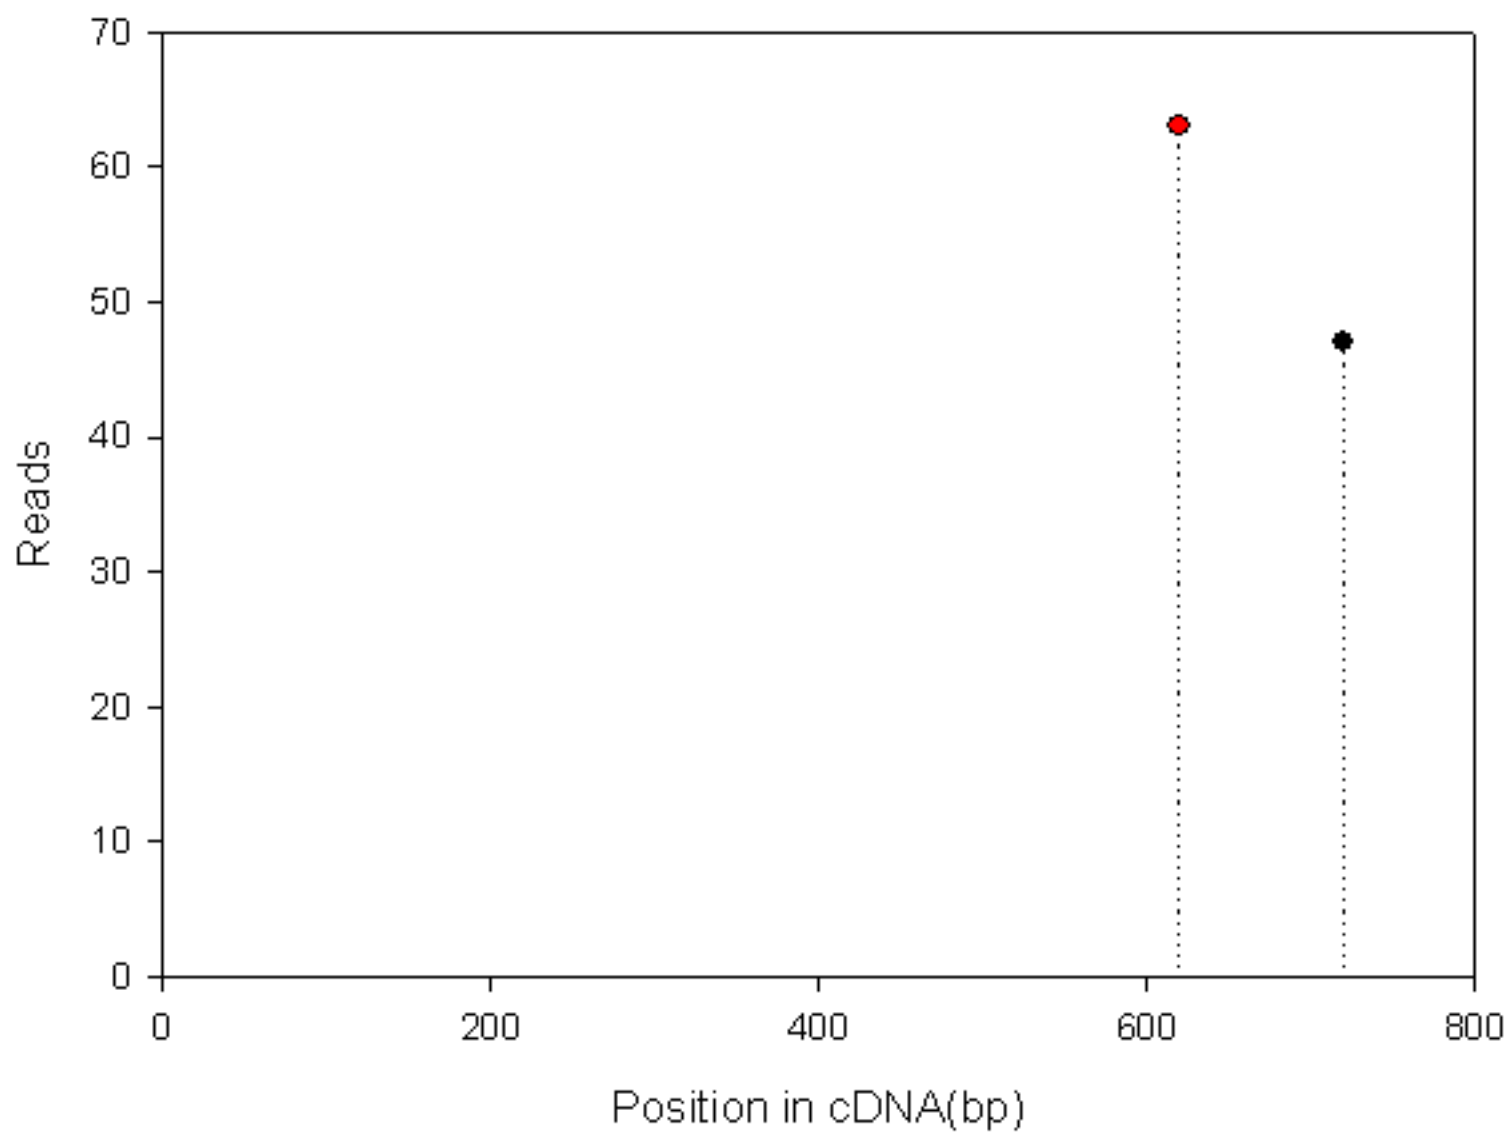

```

5' UUAUUGACUUA-AUCAACAAGAAGUCC 3'      Cs5g27500.1
   : : : : : : : : : : : : : : : :
3' ----ACUGGGUAUAGUUGUUAUUUA-- 5'      Csi-miR833.1
  
```

Csi-miR833.1, target=Cs9g02420.1 gene=Cs9g02420  
 Category:2  
 Score=4.5  
 Cleavage Site=935

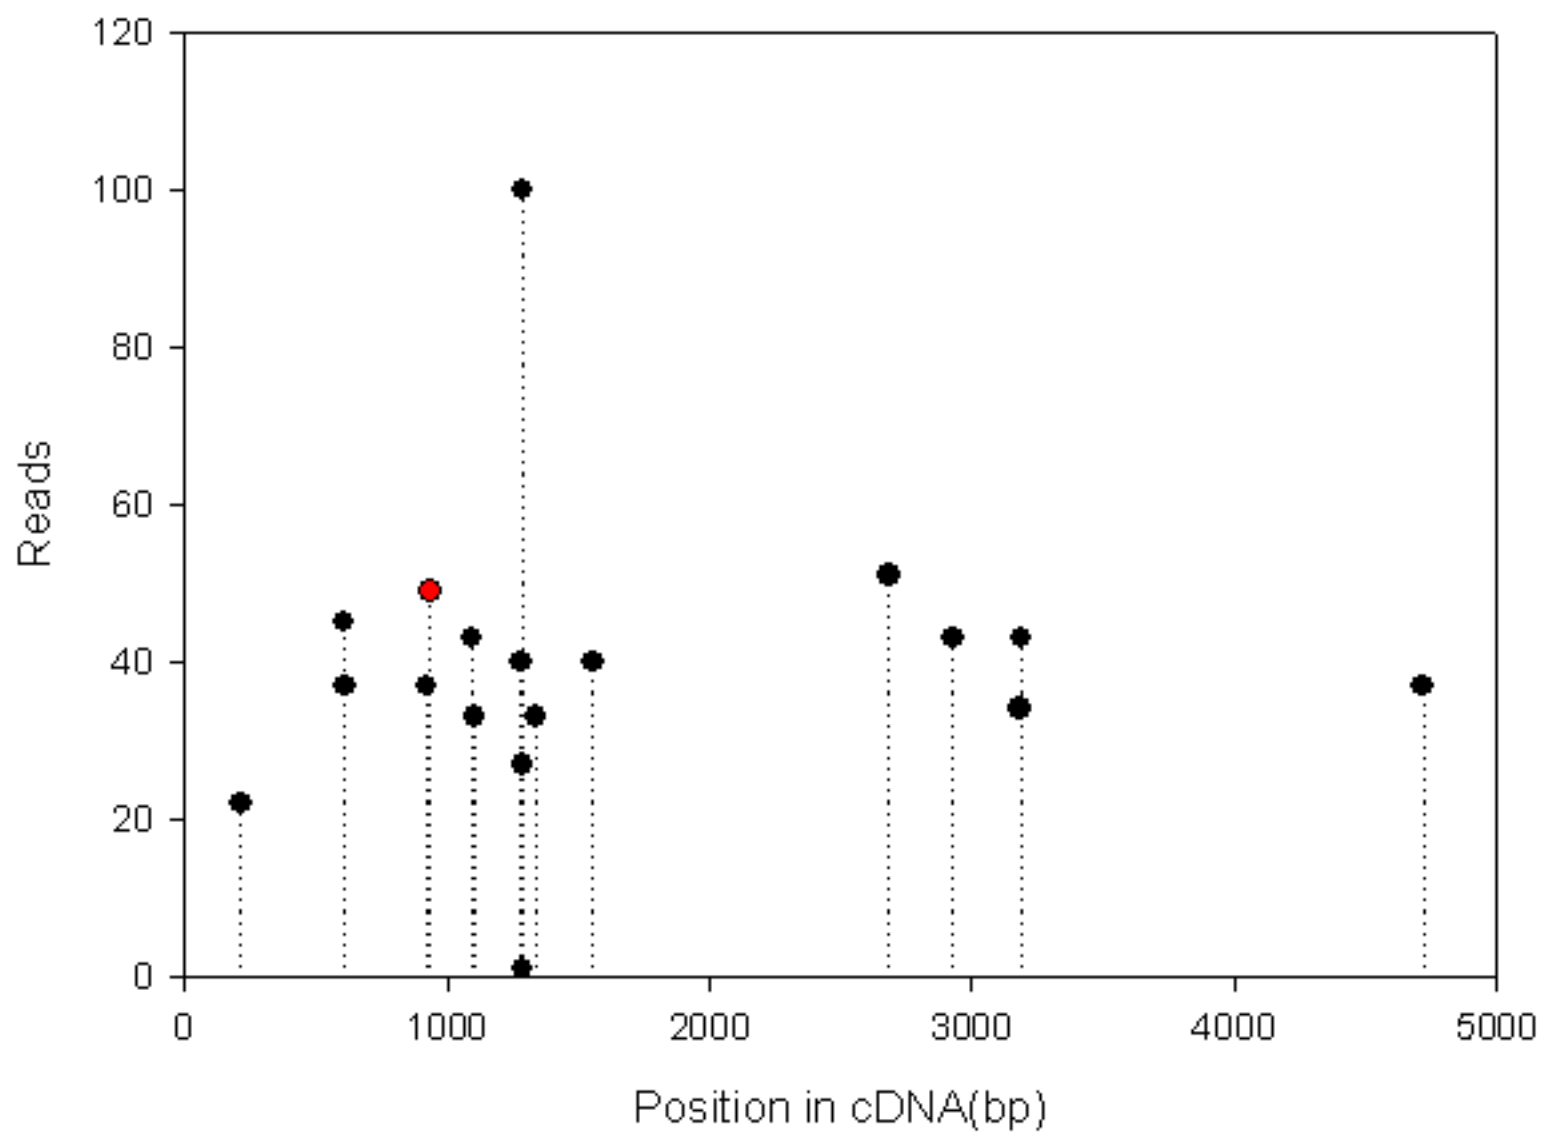

```

5' ACUGUUCUGUA-CAACAAUAAAUUUUC 3'      Cs9g02420.1
   :: .:..:: ::::::::::::::
3' --ACUGGGUAUAGUUGUUAUUUA----- 5'    Csi-miR833.1
  
```



Csi-miRN01, target=Cs8g10430.1 gene=Cs8g10430

Category:2

Score=5

Cleavage Site=460

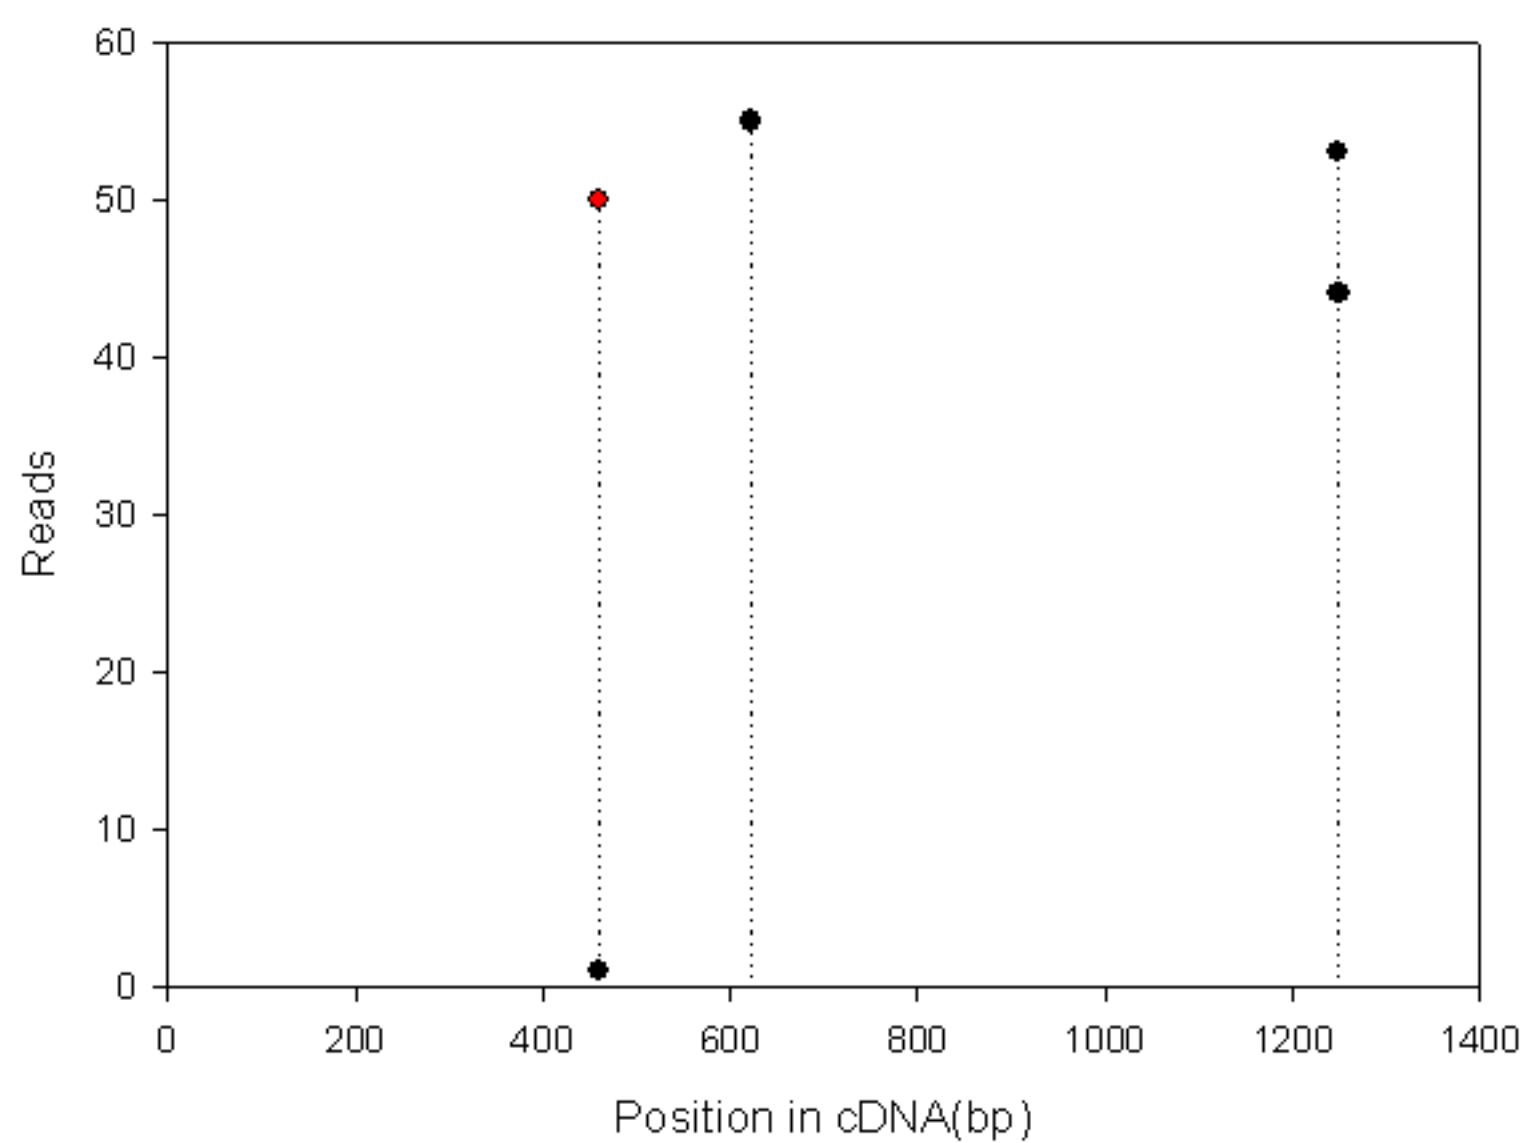

5' AAUUUUAAC-GAAGGGUGAUUUGUUUU 3'

Cs8g10430.1

.....

3' ----AAUUGUCUUUUCACUGAGCAA-- 5'

Csi-miRN01

Csi-miRN02, target=Cs3g18790.1 gene=Cs3g18790  
 Category:1  
 Score=2  
 Cleavage Site=1818

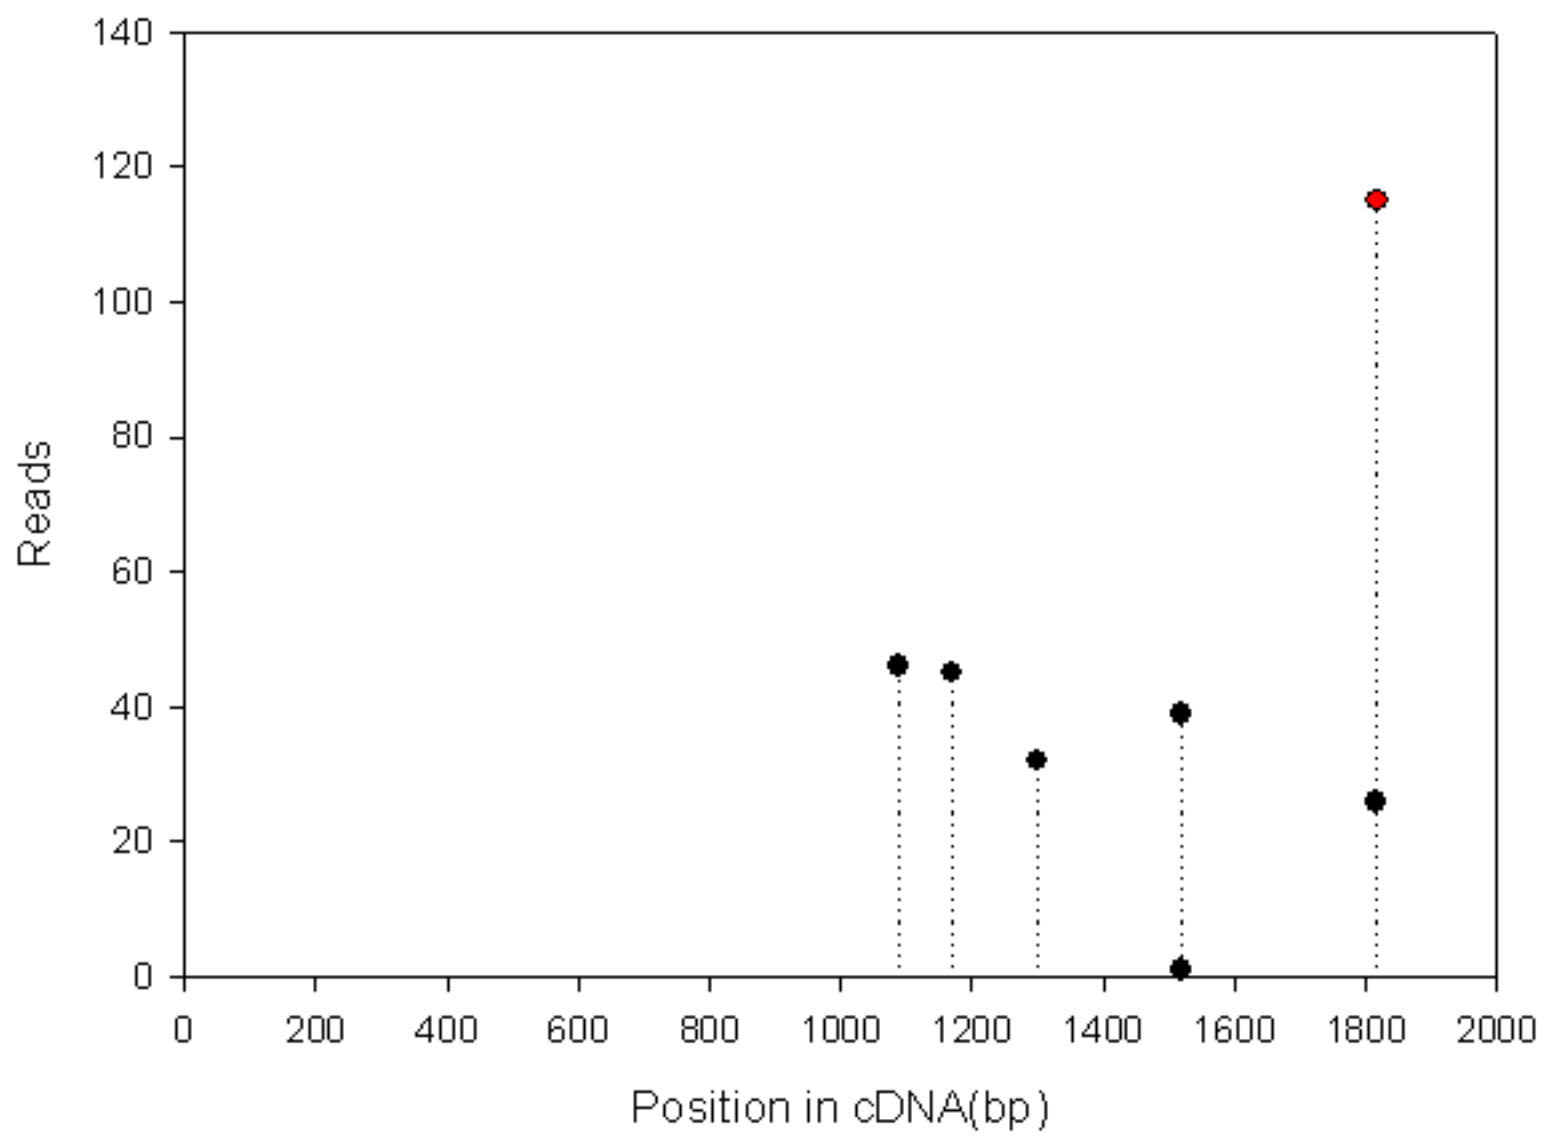

```

5' UGCAACUGUGGCACGGUACCACAGUU 3'      Cs3g18790.1
      :::::::::::::::::::: :::::
3' -----GACACCGUGCCAUGAUGUCA 5'      Csi-miRN02
  
```

Csi-miRN02, target=Cs8g09160.1 gene=Cs8g09160  
 Category:3  
 Score=3.5  
 Cleavage Site=2245

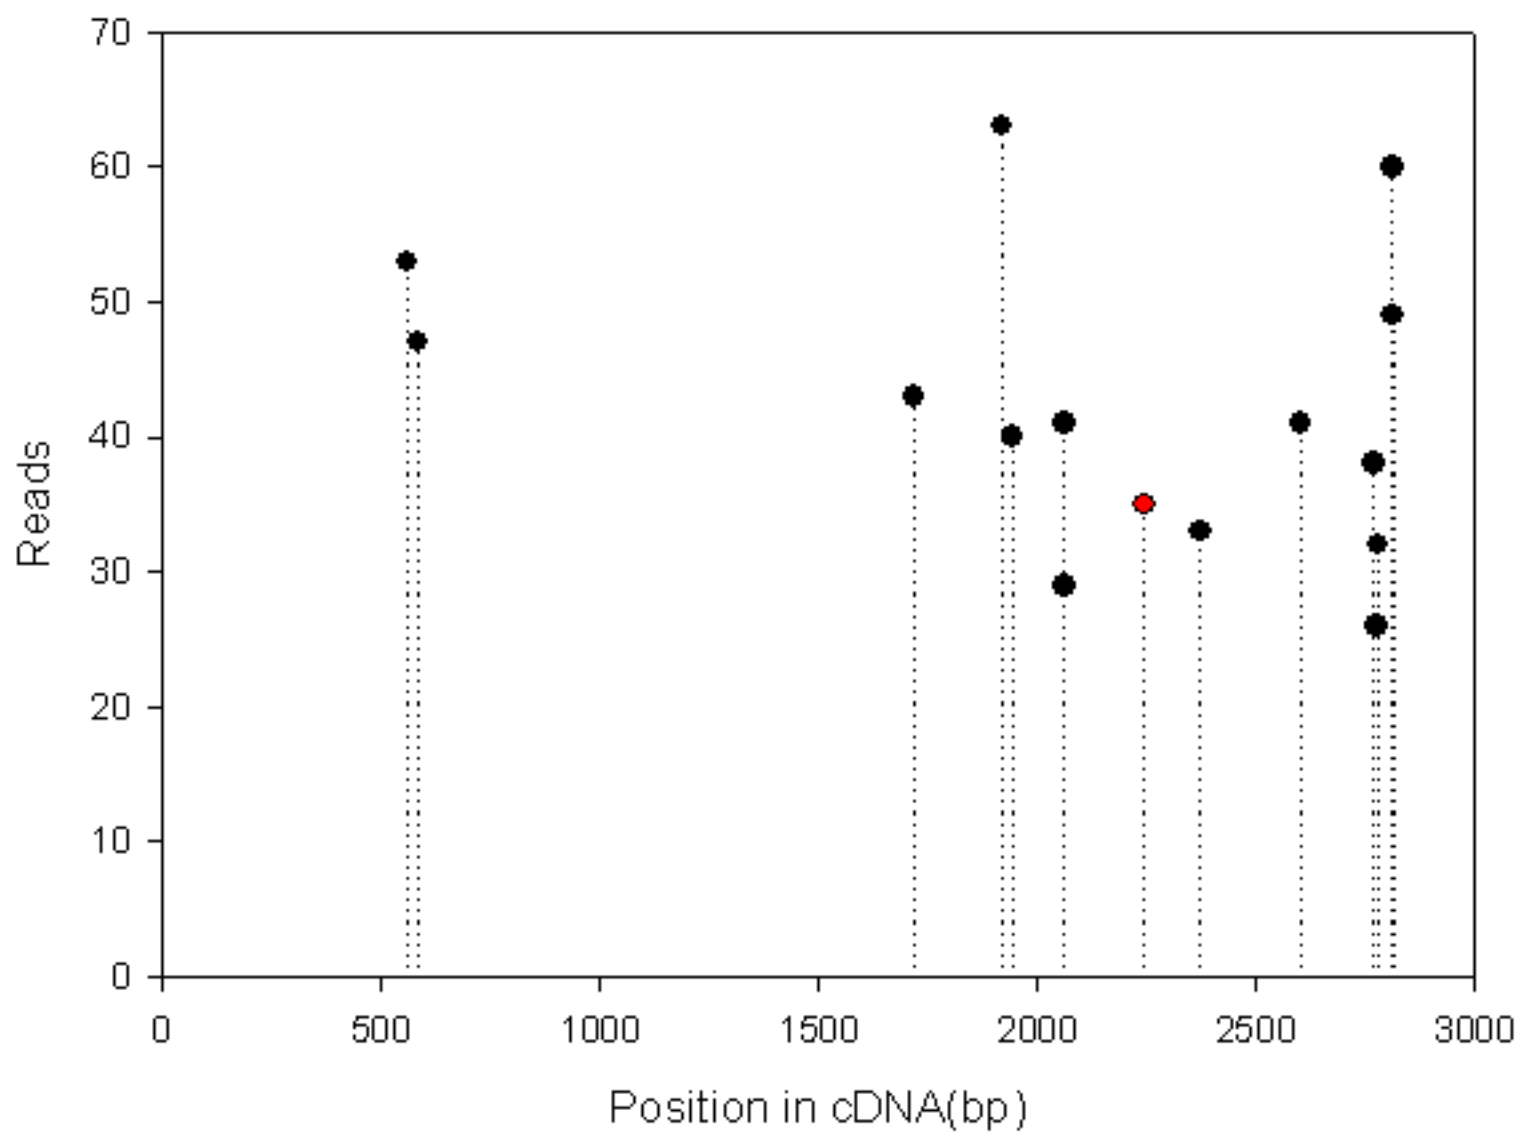

```

5' CGGUAUUACGGUACUACAGUUGUACC 3'      Cs8g09160.1
:  :  .:~::~:~::~:~::~:~::~:~::~:~::~:
3' GACACCGUGCCAUGAUGUCAA----- 5'     Csi-miRN02
  
```

Csi-miRN03, target=Orange1.1t02280.1 gene=Orange1.1t02280  
 Category:3  
 Score=5  
 Cleavage Site=188

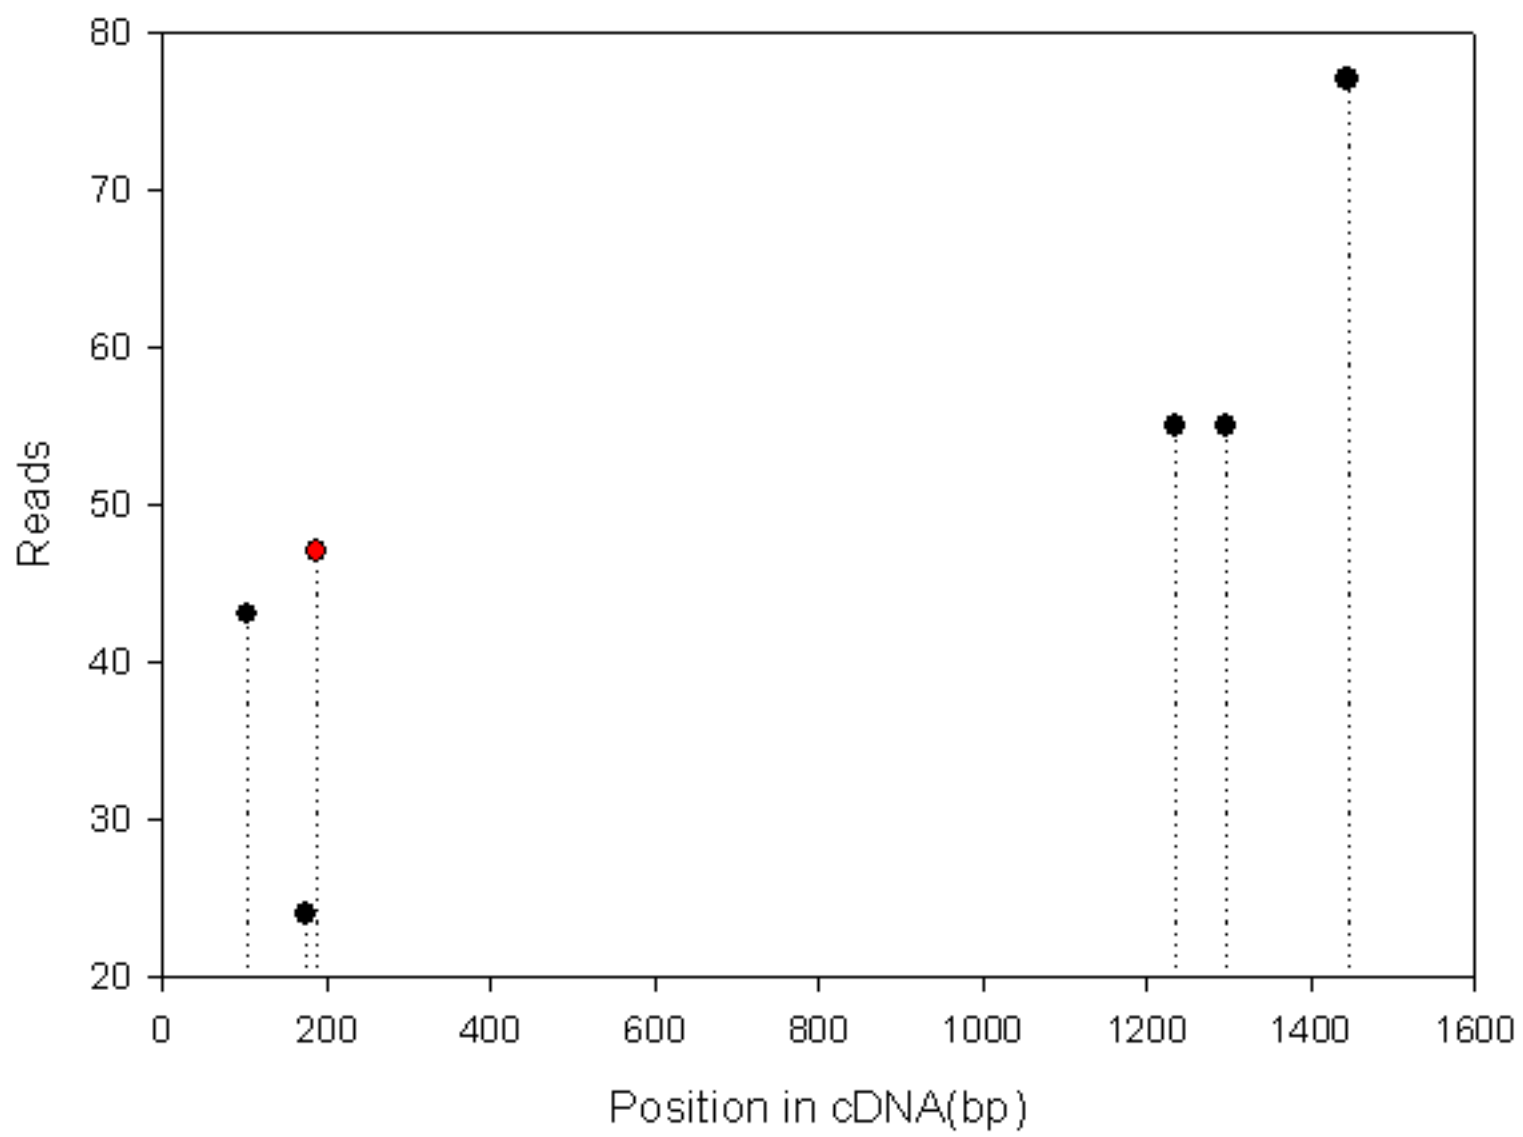

5' ACCAAAACCCGGUUCAACCAAACUC 3'  
 :: ::::: ::::: ::::: ::::: :::::  
 3' ---UUGUGGGCAAAGUGGGUUUUGU- 5'

Orange1.1t02280.1  
 Csi-miRN03

Csi-miRN04, target=Cs2g04030.2 gene=Cs2g04030

Category:3

Score=5

Cleavage Site=240

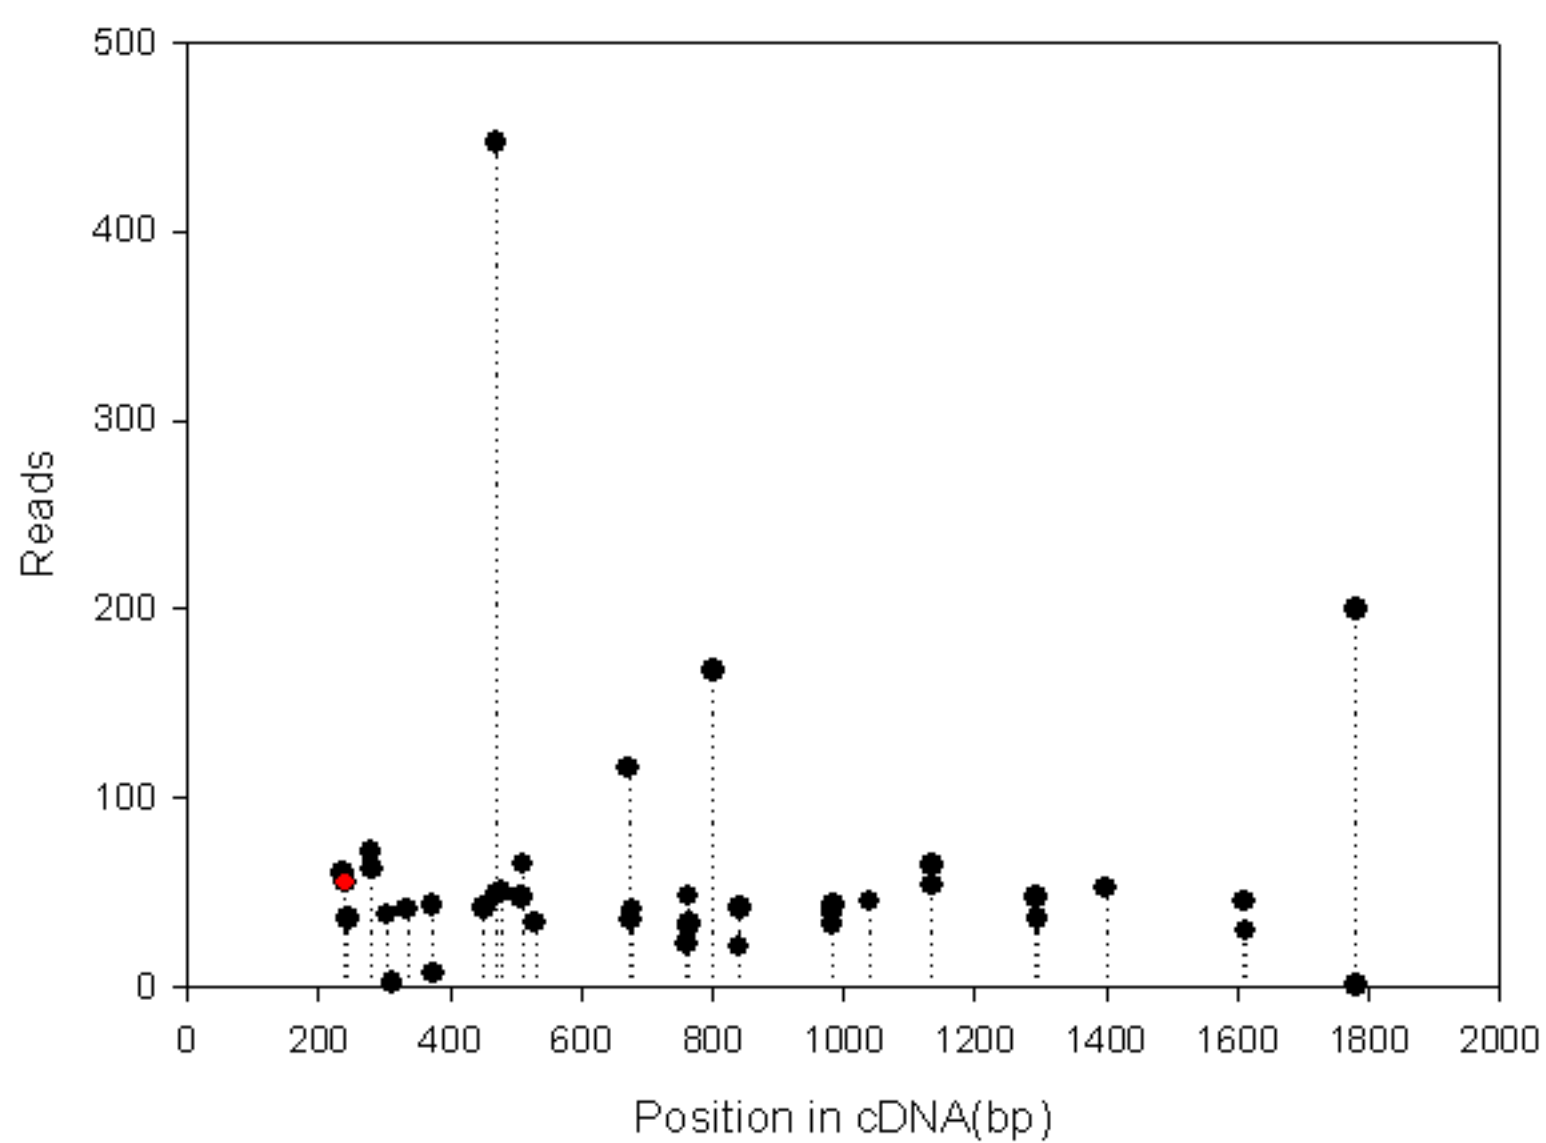

```
5' AAAAUCUAAAACAAACACACUCU-CAA 3' Cs2g04030.2
      :  :  :  :  :  :  :  :  :  :
3' -----ACAUGUAUGUGUGAGAUGUU 5' Csi-miRN04
```



Csi-miRN07, target=Cs6g11600.1 gene=Cs6g11600

Category:3

Score=5

Cleavage Site=2004

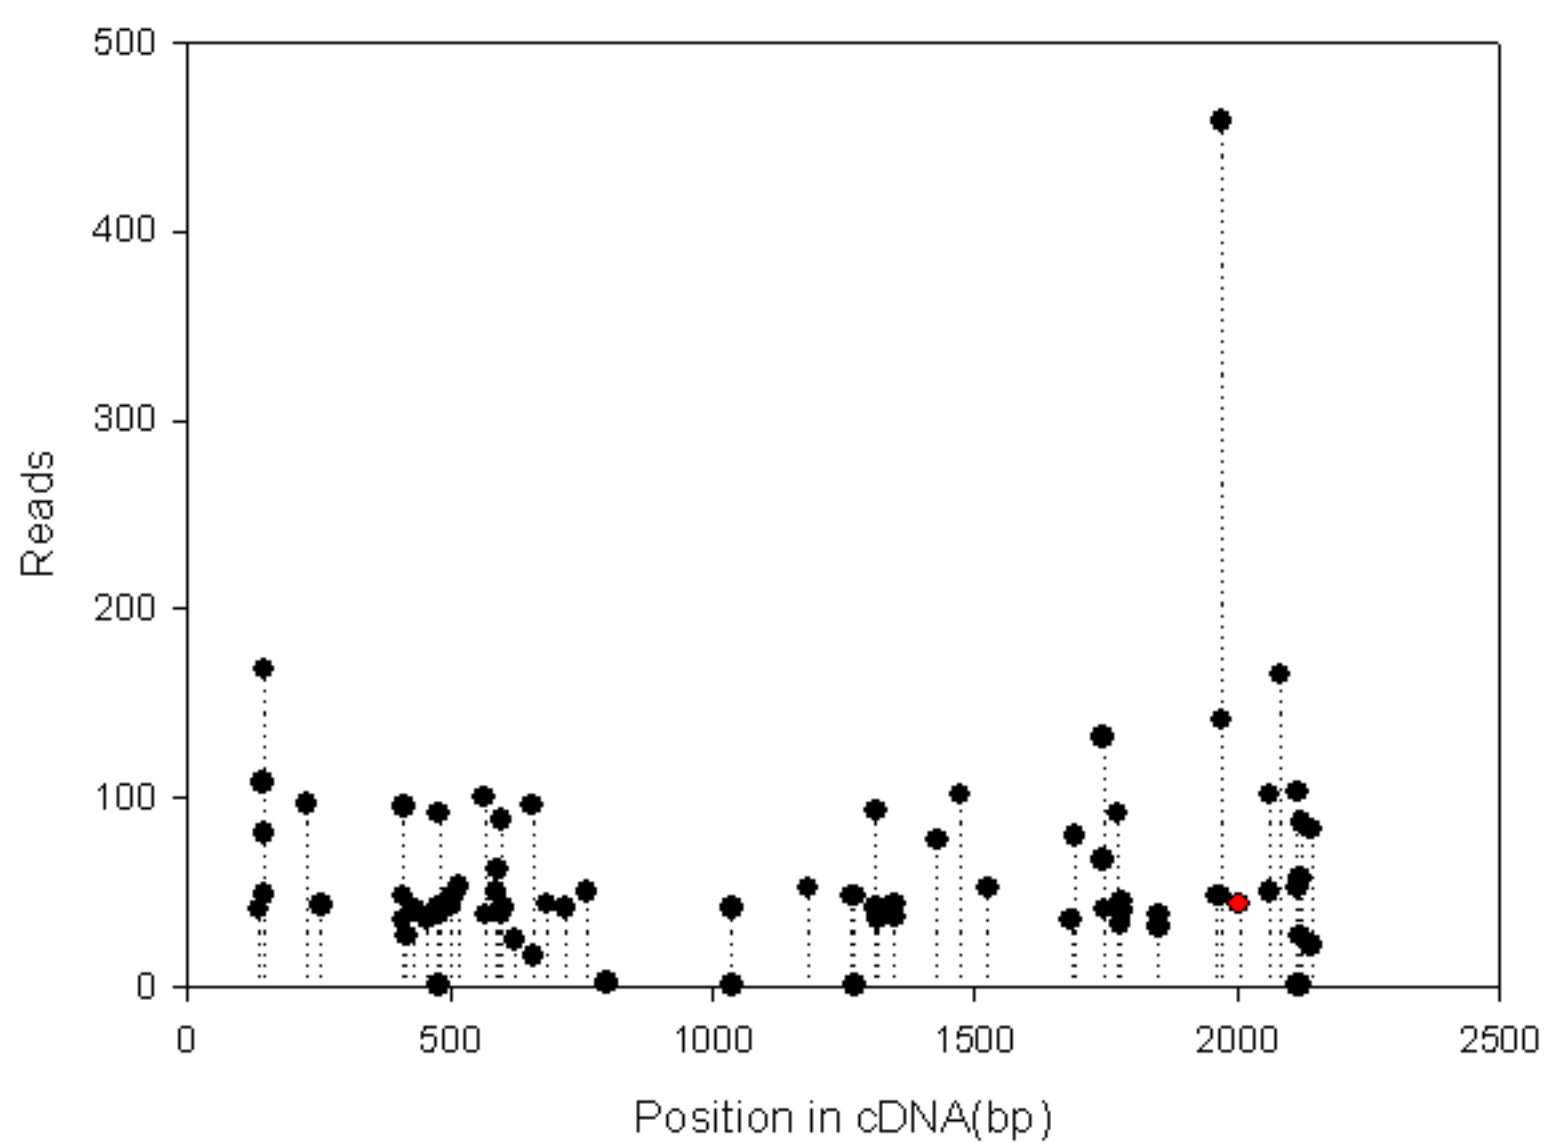

```
5' UGUUG-UUGAUGUUGUCUCCAUAAC 3'      Cs6g11600.1
   . . . . : : : : : : : : : :
3' GUGGCAAACUAGAACAGAAGG----- 5'      Csi-miRN07
```

Csi-miRN10, target=Cs4g05310.1 gene=Cs4g05310  
 Category:3  
 Score=4.5  
 Cleavage Site=1120

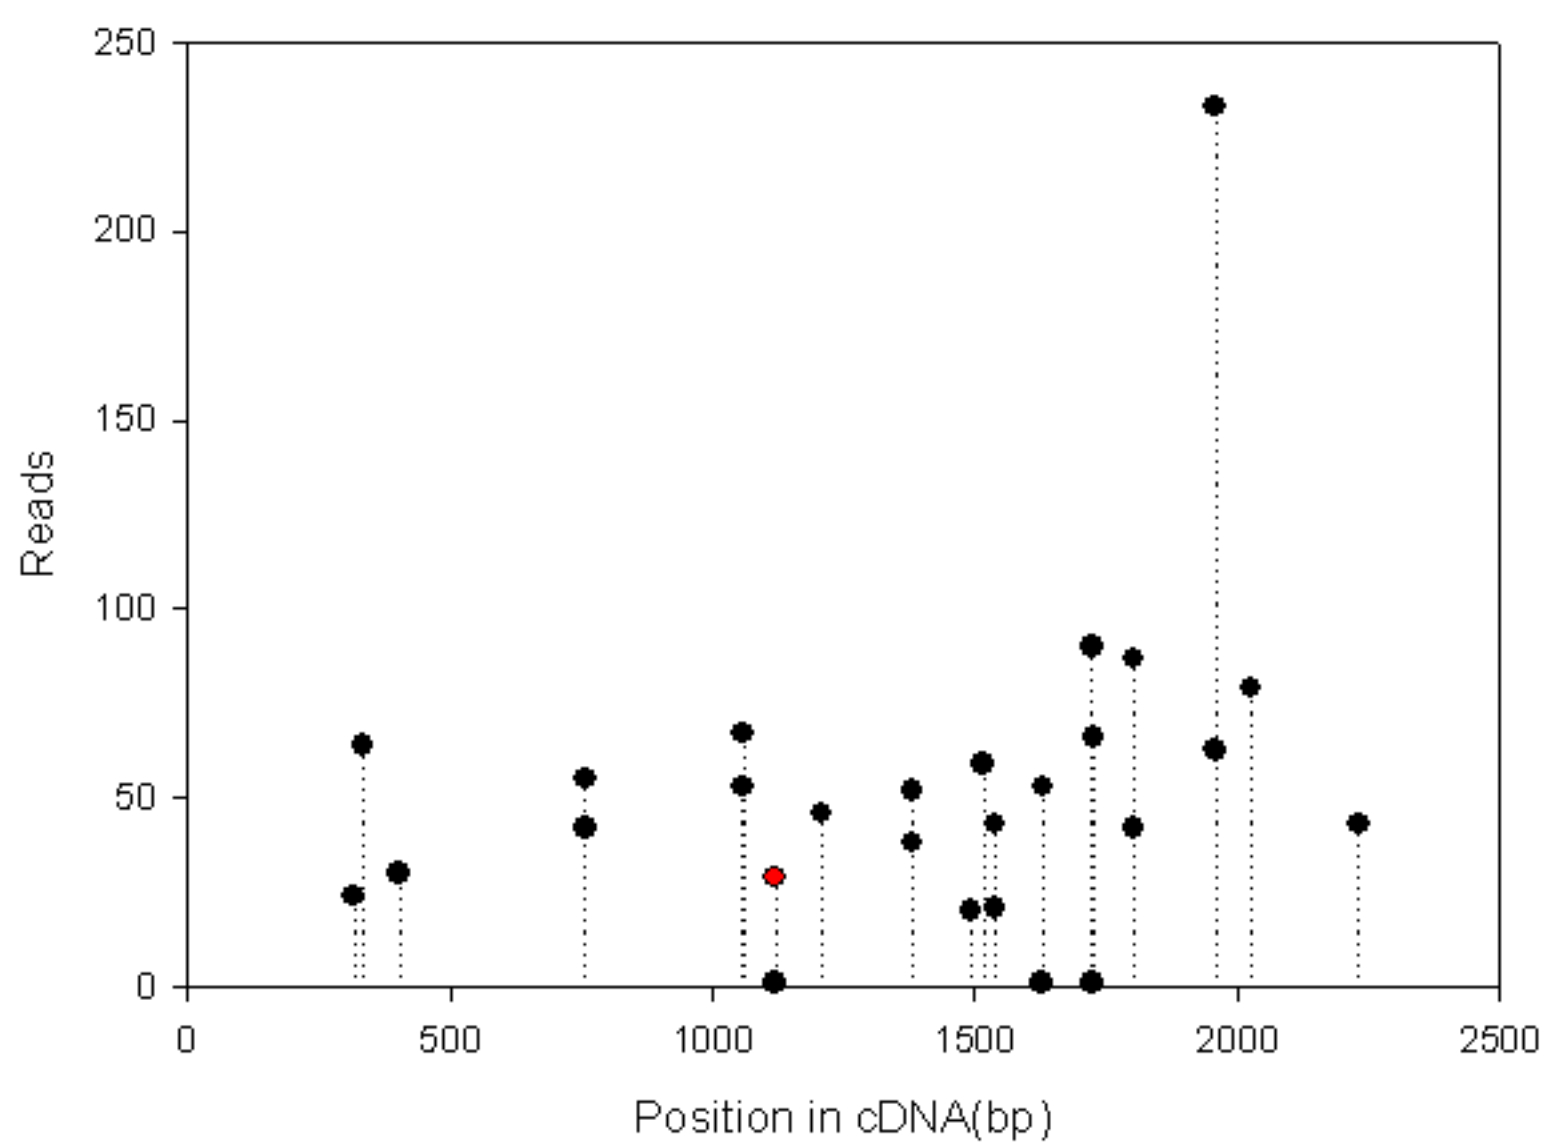

```

5' UGUAAAAUACACACCUCAAUGGGAGU 3'          Cs4g05310.1
   ::::: ::::: :::::
3' ACAUUGUAUGUGU-GAGUUAUU---- 5'          Csi-miRN10

```



Csi-miRN11, target=Cs8g13560.1 gene=Cs8g13560  
 Category:1  
 Score=2  
 Cleavage Site=302

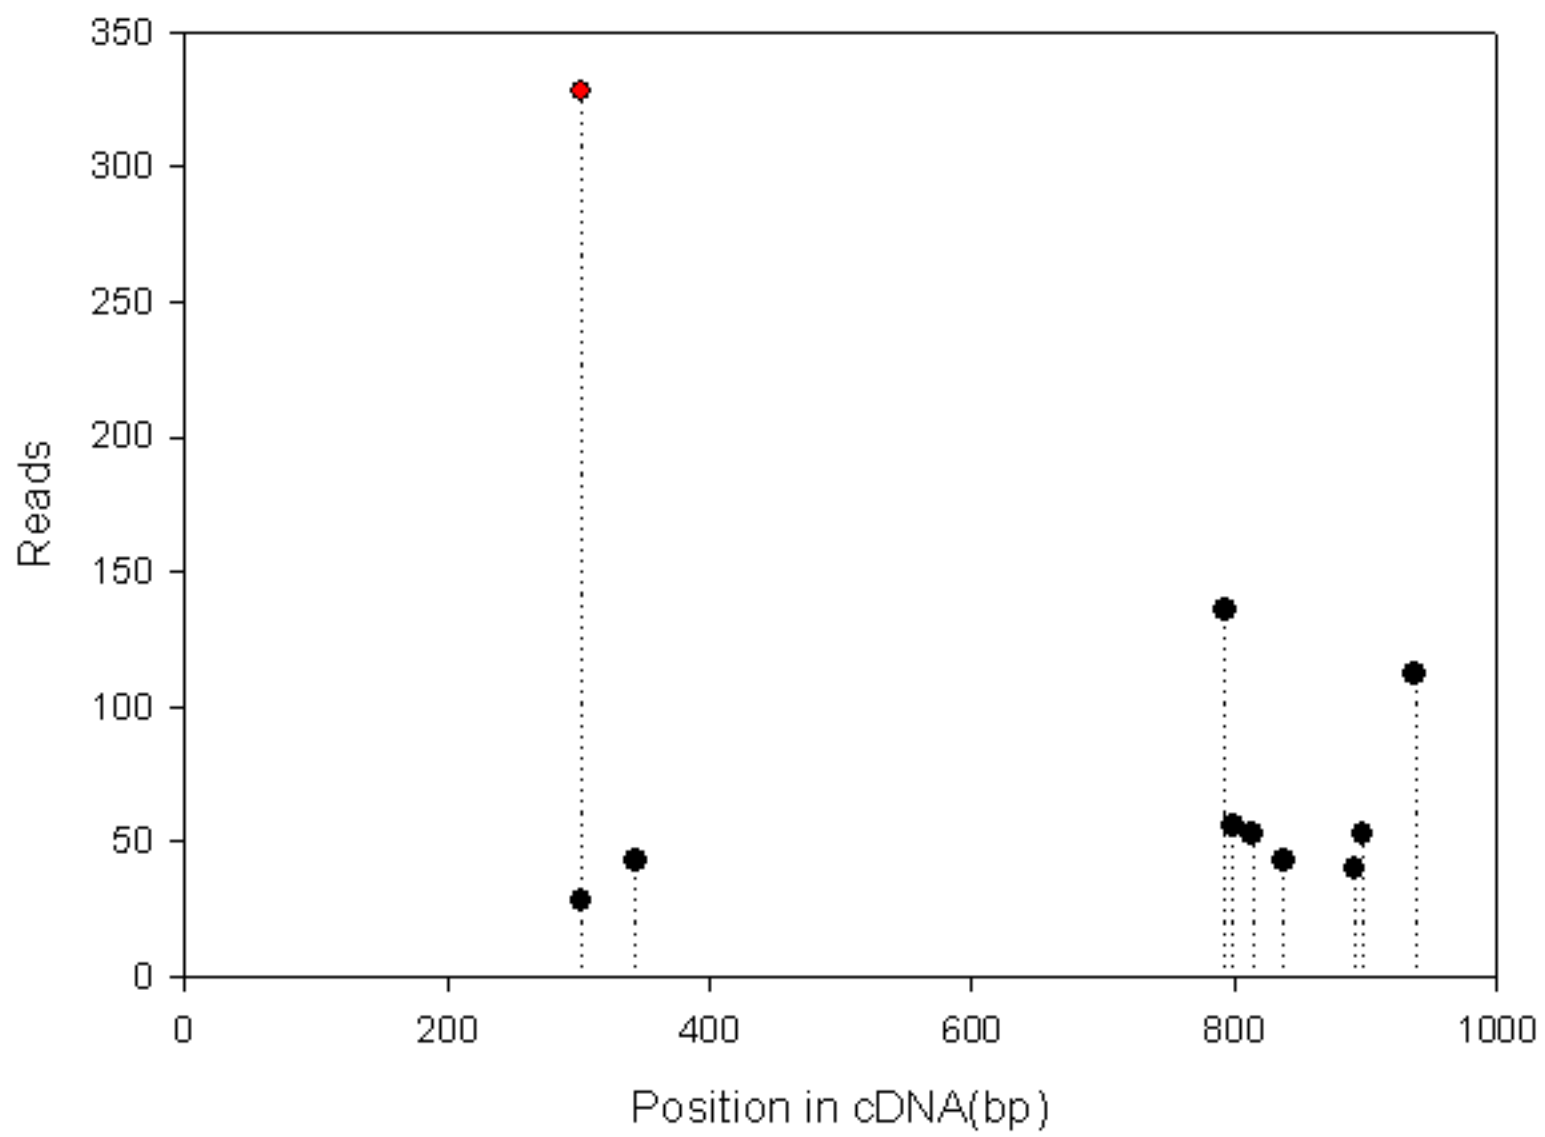

```

5' GUACCGUAAAAAGCUC CUGCGACAUG 3'      Cs8g13560.1
   : : : : : : : : : : : : : : : :
3' -UUGGCAUCUUUCGAGGACGCU----- 5'      Csi-miRN11
  
```

Csi-miRN14, target=Cs7g14990.1 gene=Cs7g14990

Category:3

Score=4.5

Cleavage Site=2345

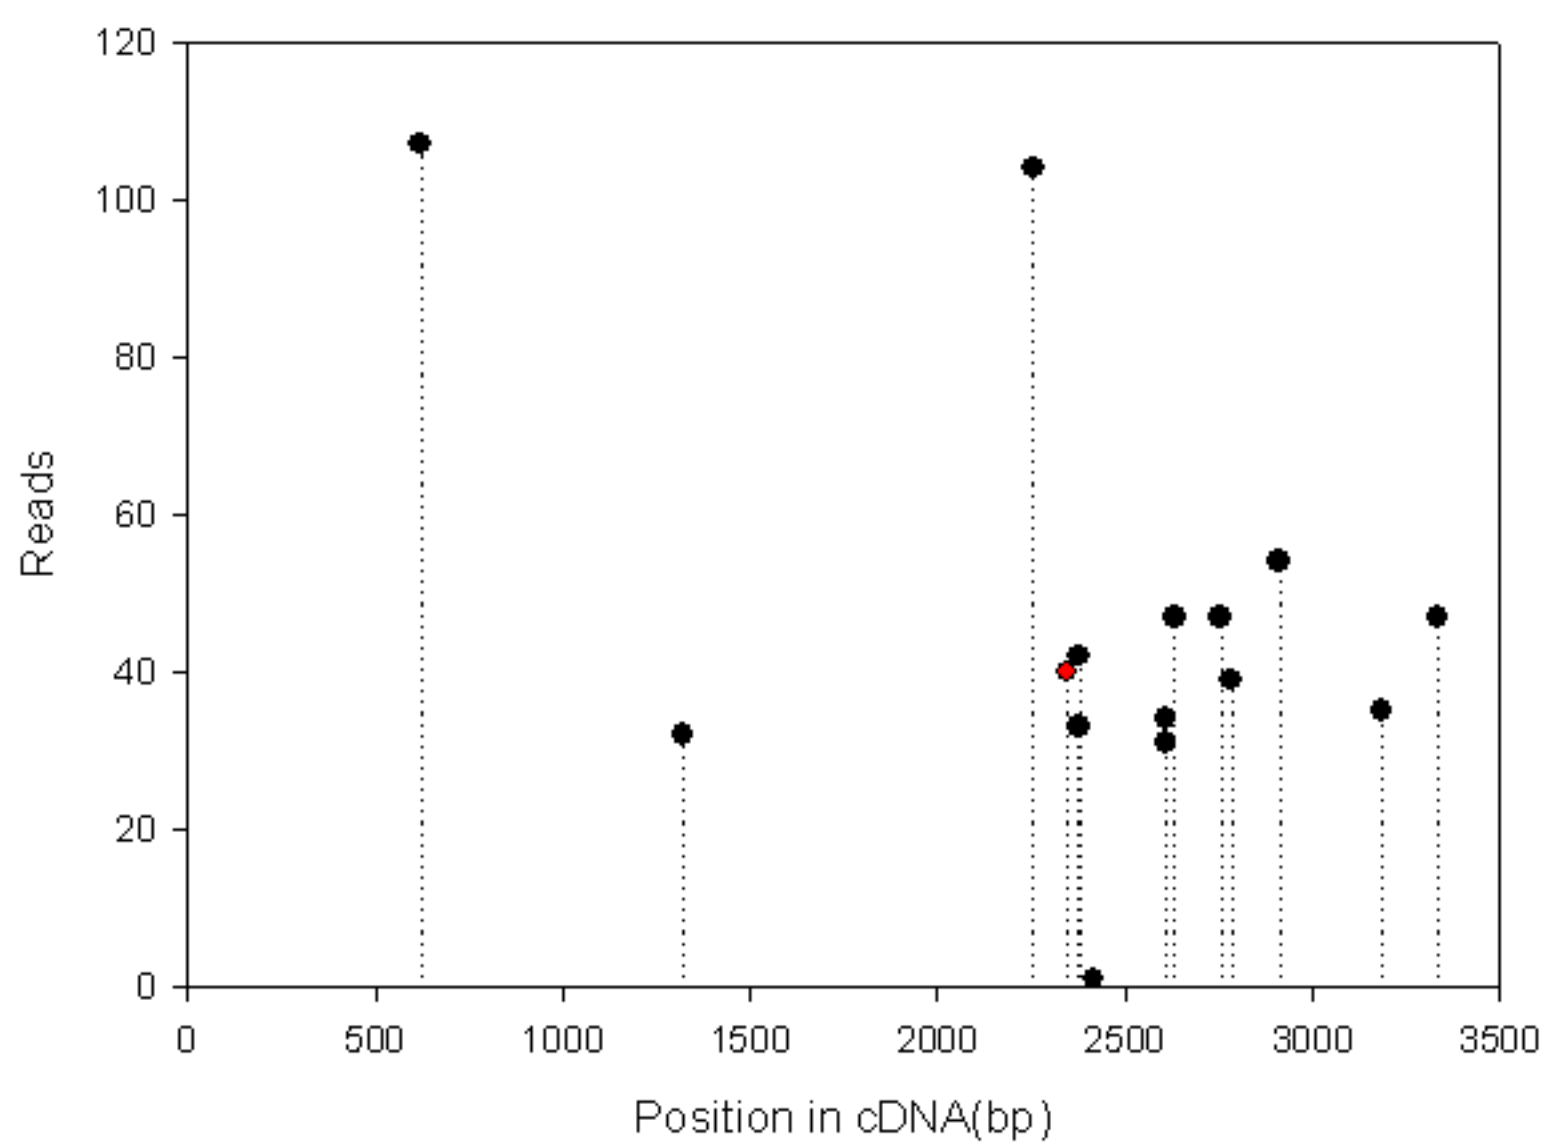

5' GAUGAAUAAUU-UUAUCAGGACUAUGA 3'

Cs7g14990.1

.....

3' ---CUUAAGAAUAAUAGUUCUGAUACG 5'

Csi-miRN14

Csi-miRN17, target=Cs5g04990.1 gene=Cs5g04990

Category:3

Score=5

Cleavage Site=2109

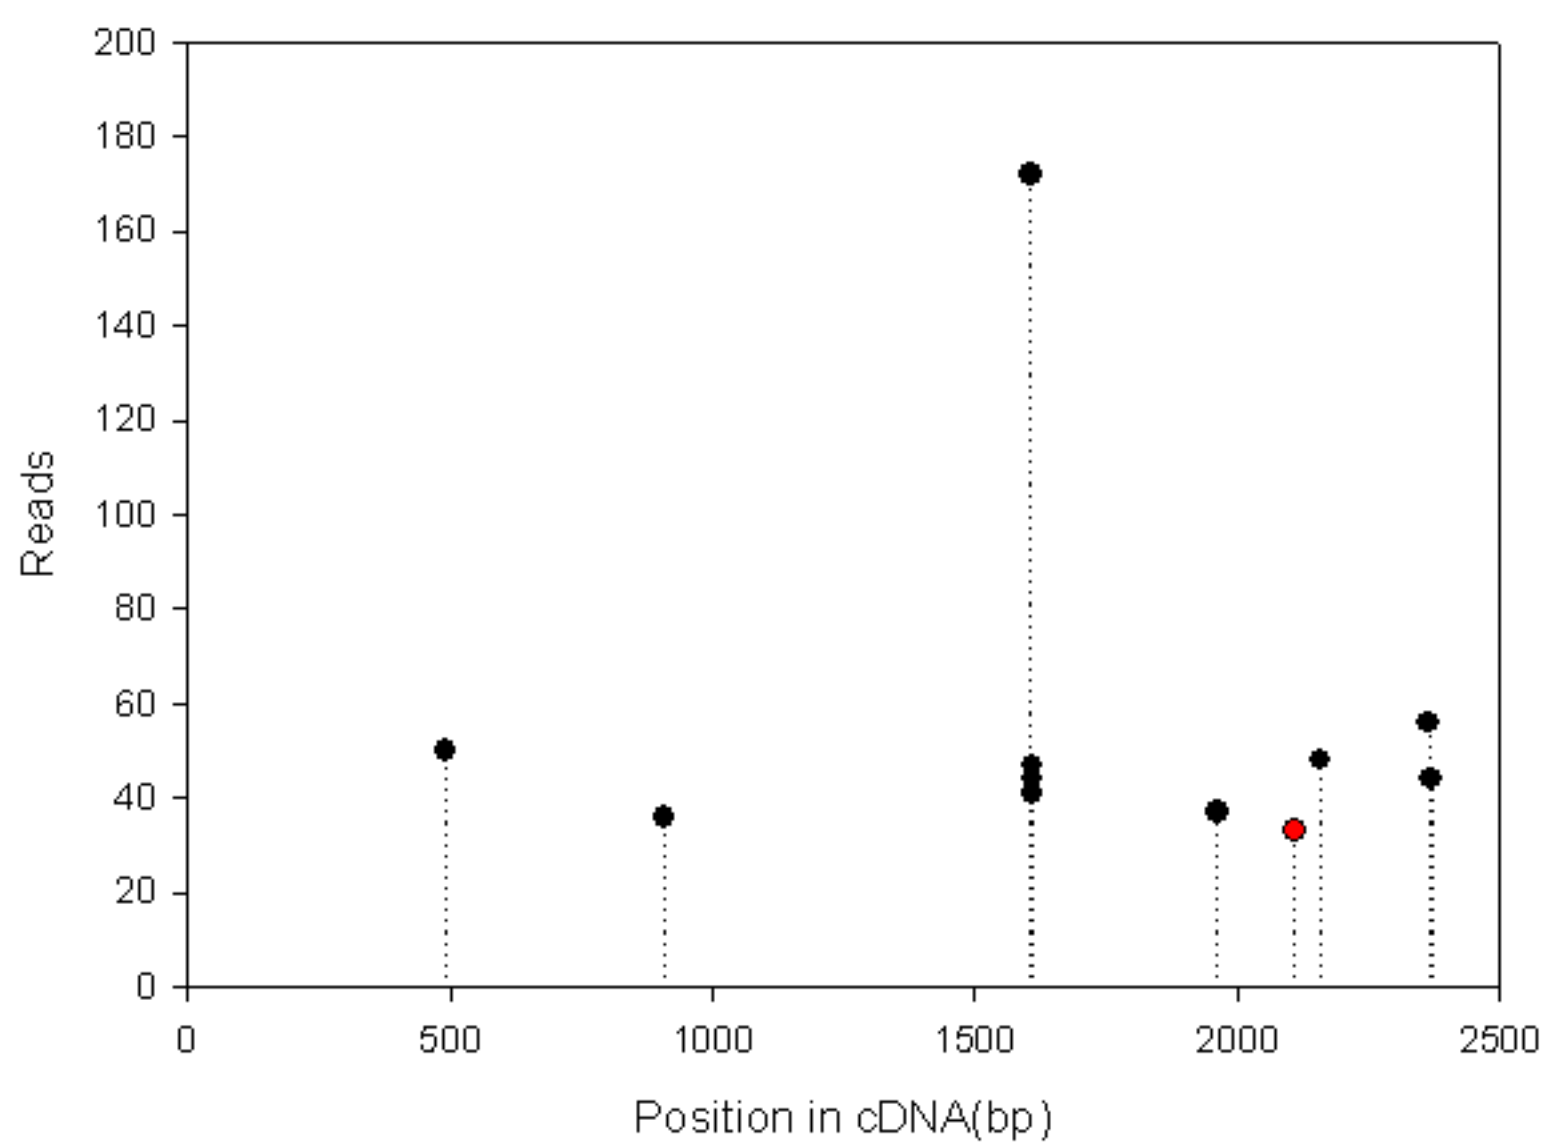

5' GGCUUCCUAAUG-ACACGCUCCACAAC 3'

Cs5g04990.1

.....

3' -----ACAUUGUAUGUGAGGUGUU- 5'

Csi-miRN17

Csi-miRN19, target=Cs5g32800.1 gene=Cs5g32800

Category:3

Score=5

Cleavage Site=1084

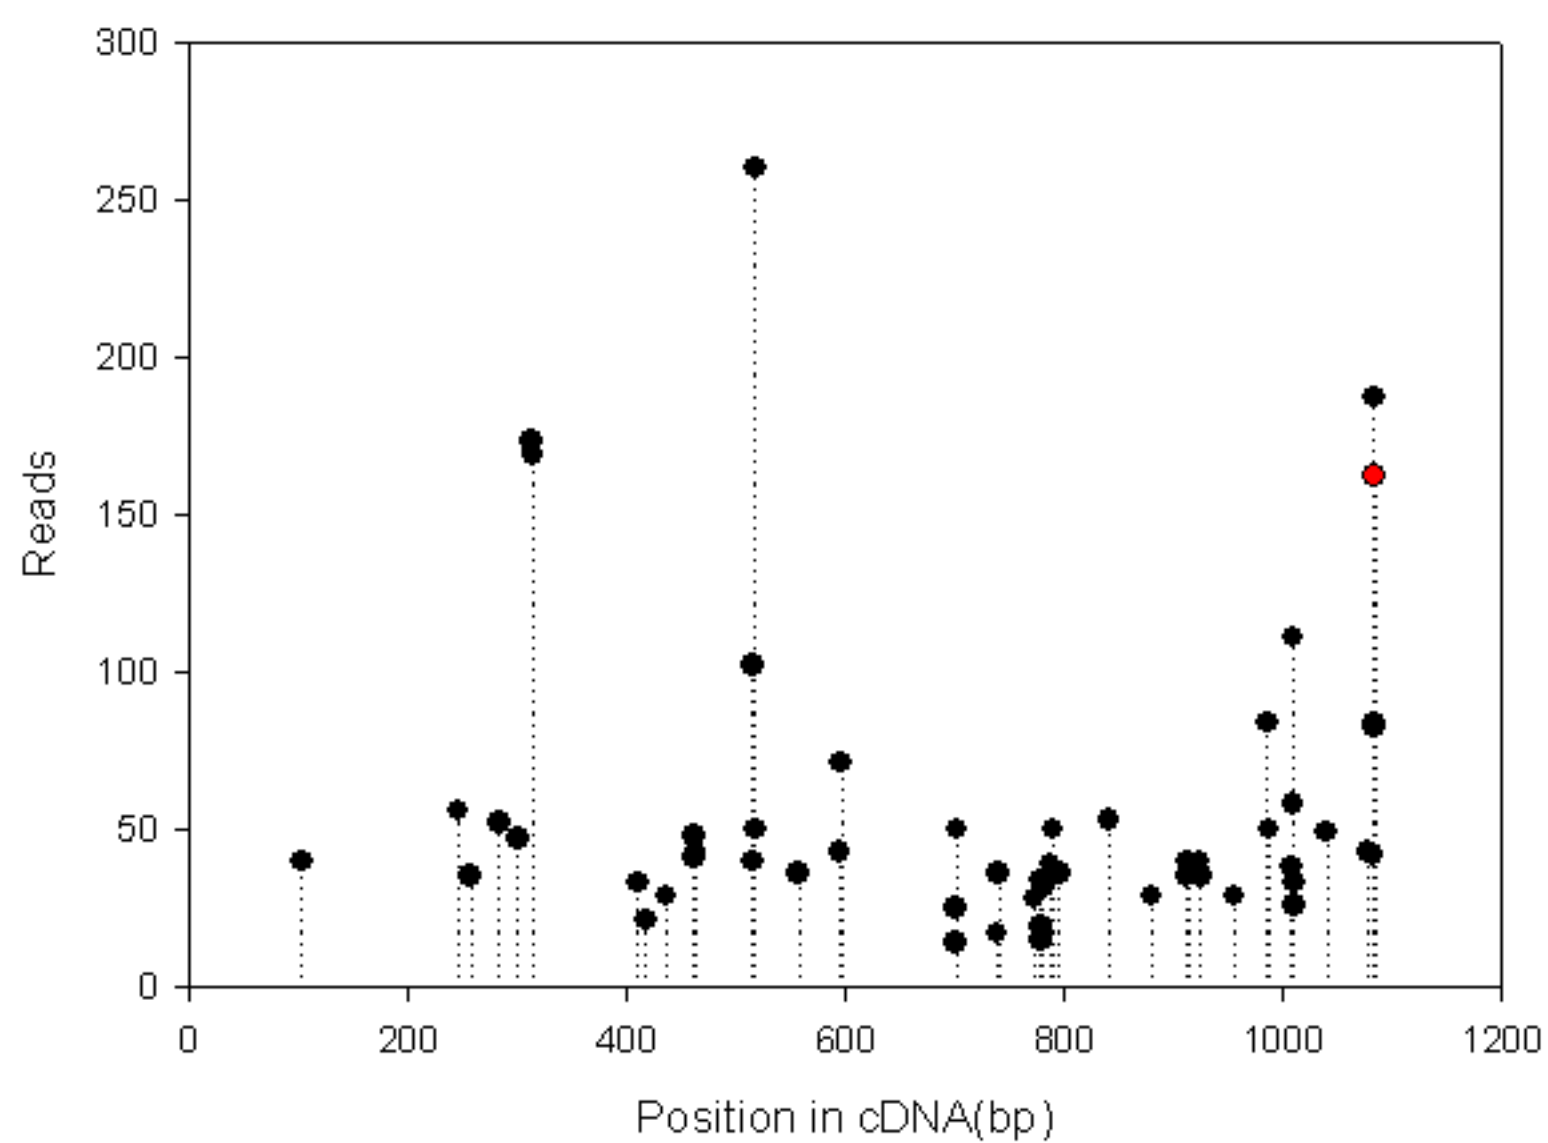

5' GUAAA AUUUAG-UAUUCA AUGAACGAC 3'

Cs5g32800.1

.....

3' -----AAAUCUCA AAGUUGCUGCUU 5'

Csi-miRN19

Csi-miRN20, target=Cs1g12230.1 gene=Cs1g12230  
category:1  
score=4.5  
Cleavage Site=1297

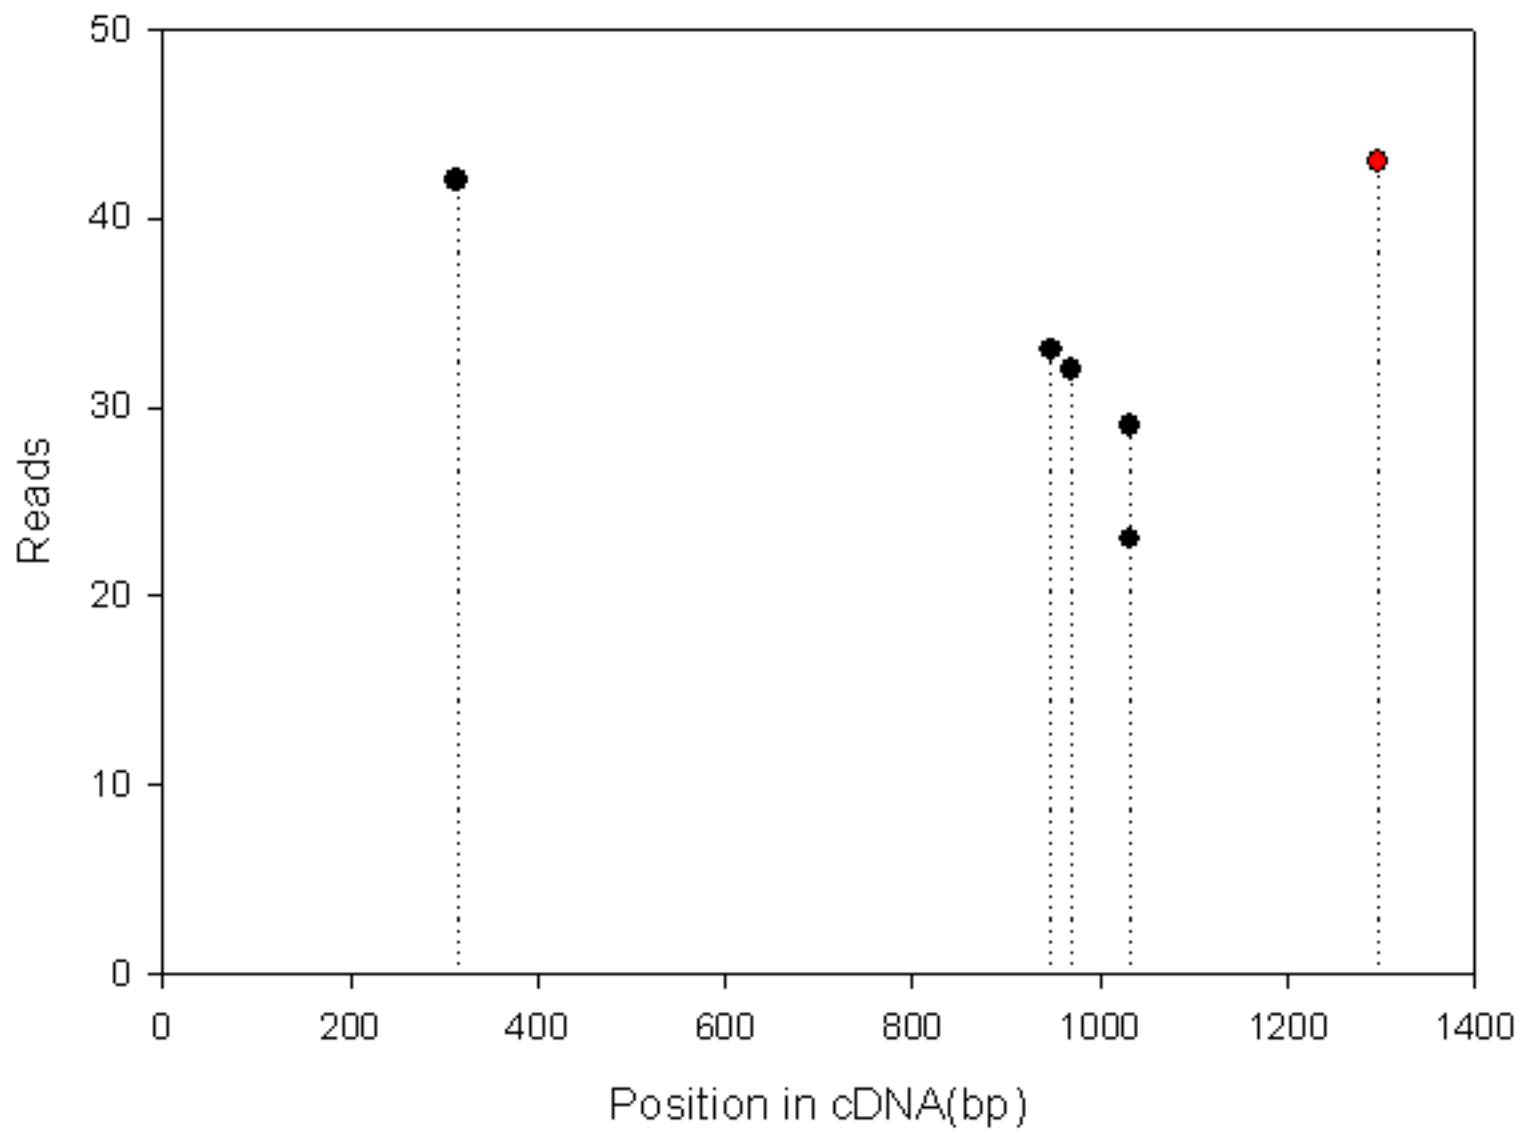

|                                  |             |
|----------------------------------|-------------|
| 5' CAUUGUCAUGCAUCAUGCAAAAAAUU 3' | Cs1g12230.1 |
| :::    :::                  :::  |             |
| 3' --AAUAGU-CGUAGUACGUUGUUUU- 5' | Csi-miRN20  |

Csi-miRN20, target=Cs3g05320.1 gene=Cs3g05320  
 Category:1  
 Score=0  
 Cleavage Site=451

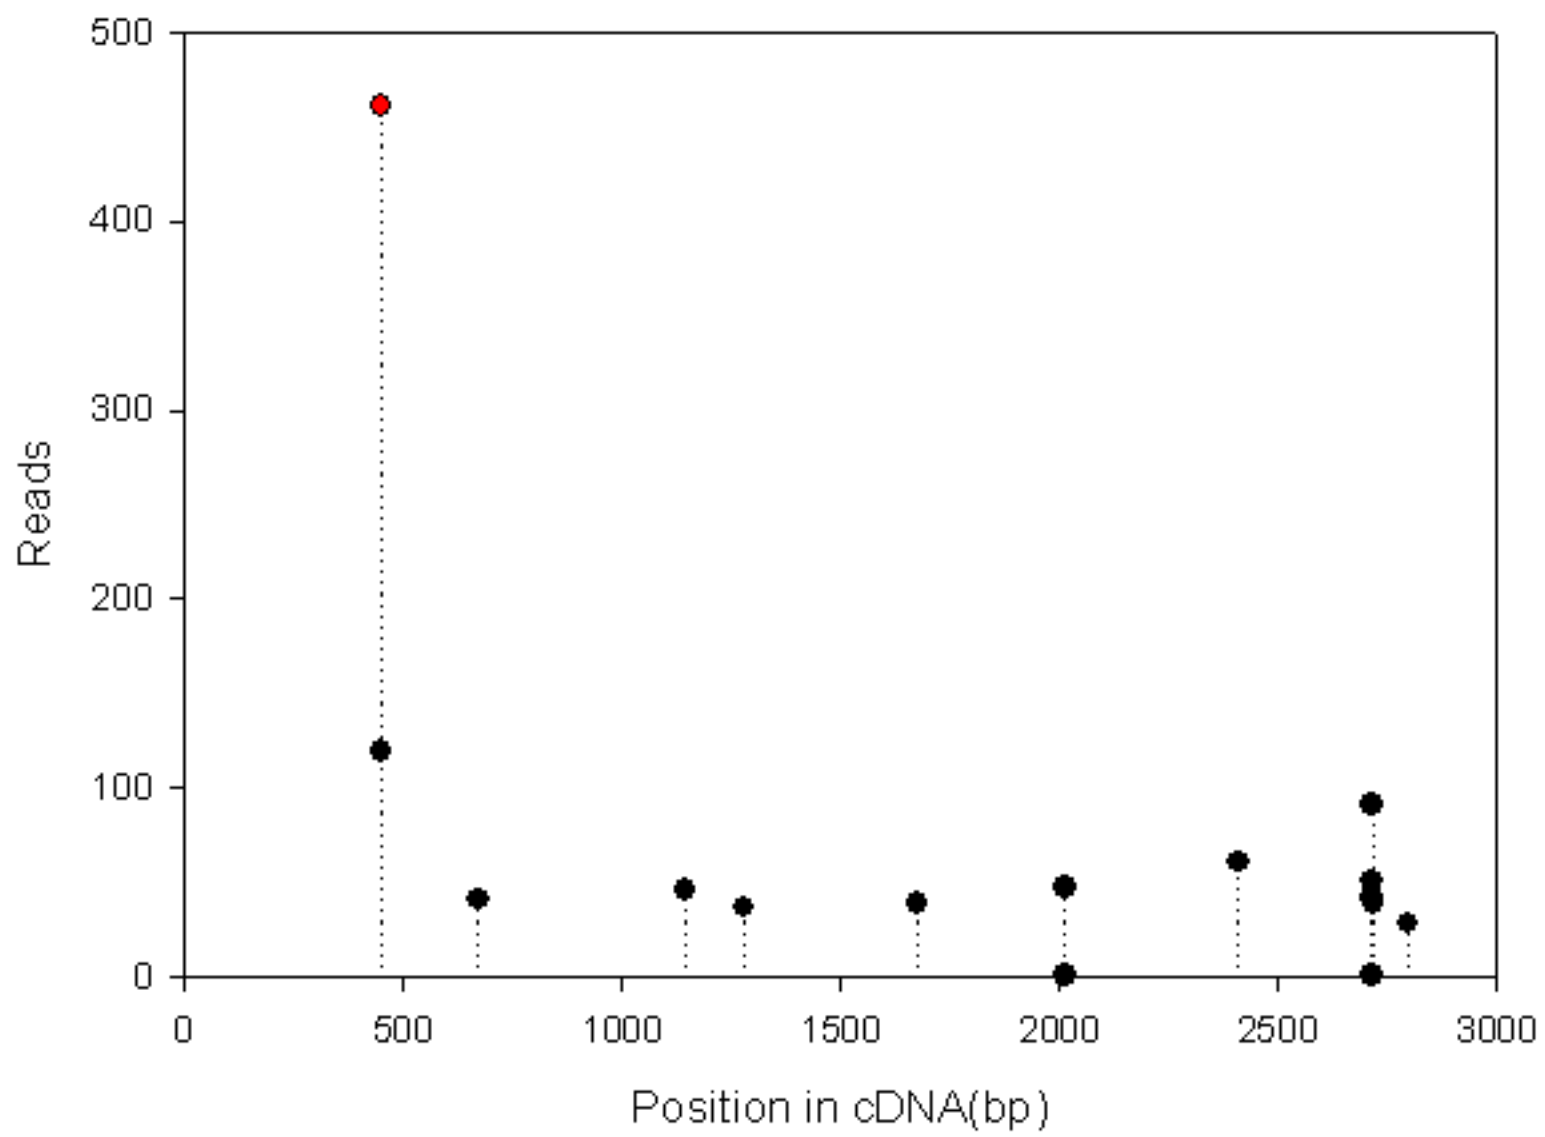

```

5' UUAUCAGCAUCAUGCAACAAAUAUAGU 3'      Cs3g05320.1
   ::::::::::::::::::::::::::::
3' AAUAGUCGUAGUACGUUGUUUU----- 5'     Csi-miRN20
  
```

Csi-miRN23, target=Cs1g07330.1 gene=Cs1g07330  
 Category:3  
 Score=5  
 Cleavage Site=130

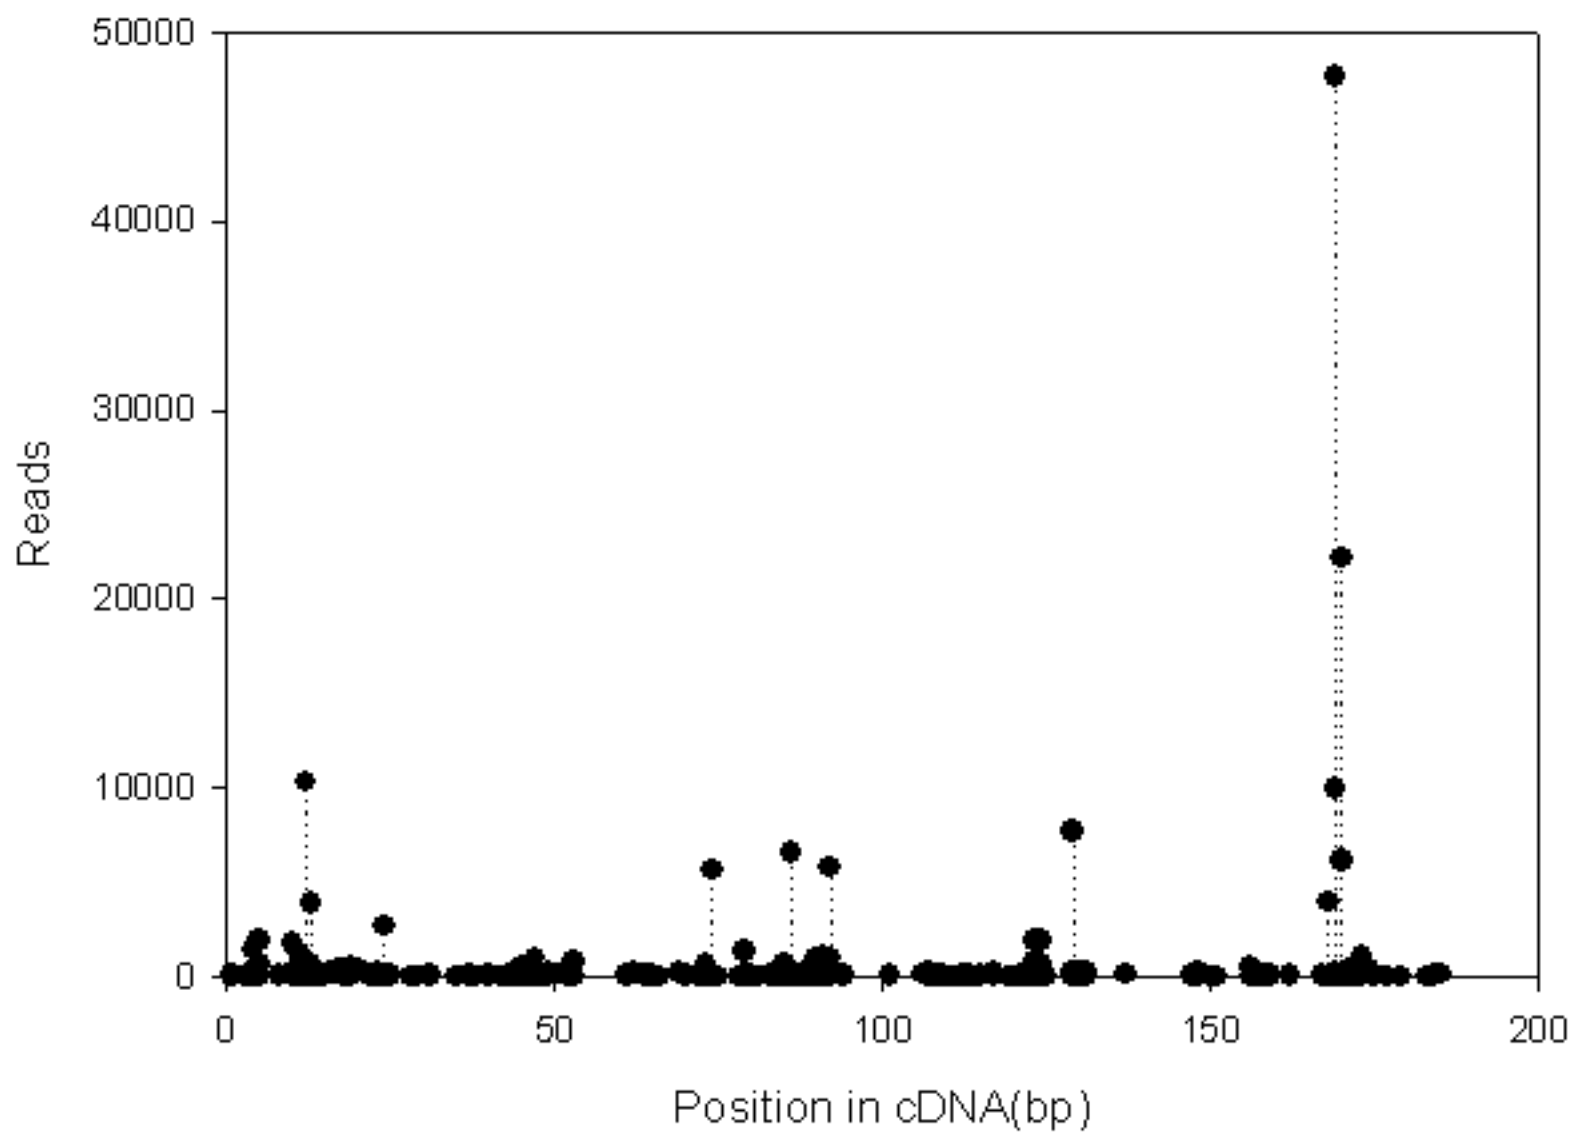

```

5'  GUCAUGGACGUU-CAGGCUGCUGAGAC  3'      Cs1g07330.1
      ::::..  :::::::::::::::
3'  -----CUGC GCCUCCGACGACUUUC  5'      Csi-miRN23

```

Csi-miRN24, target=Cs1g01190.1 gene=Cs1g01190  
 Category:3  
 Score=4.5  
 Cleavage Site=103

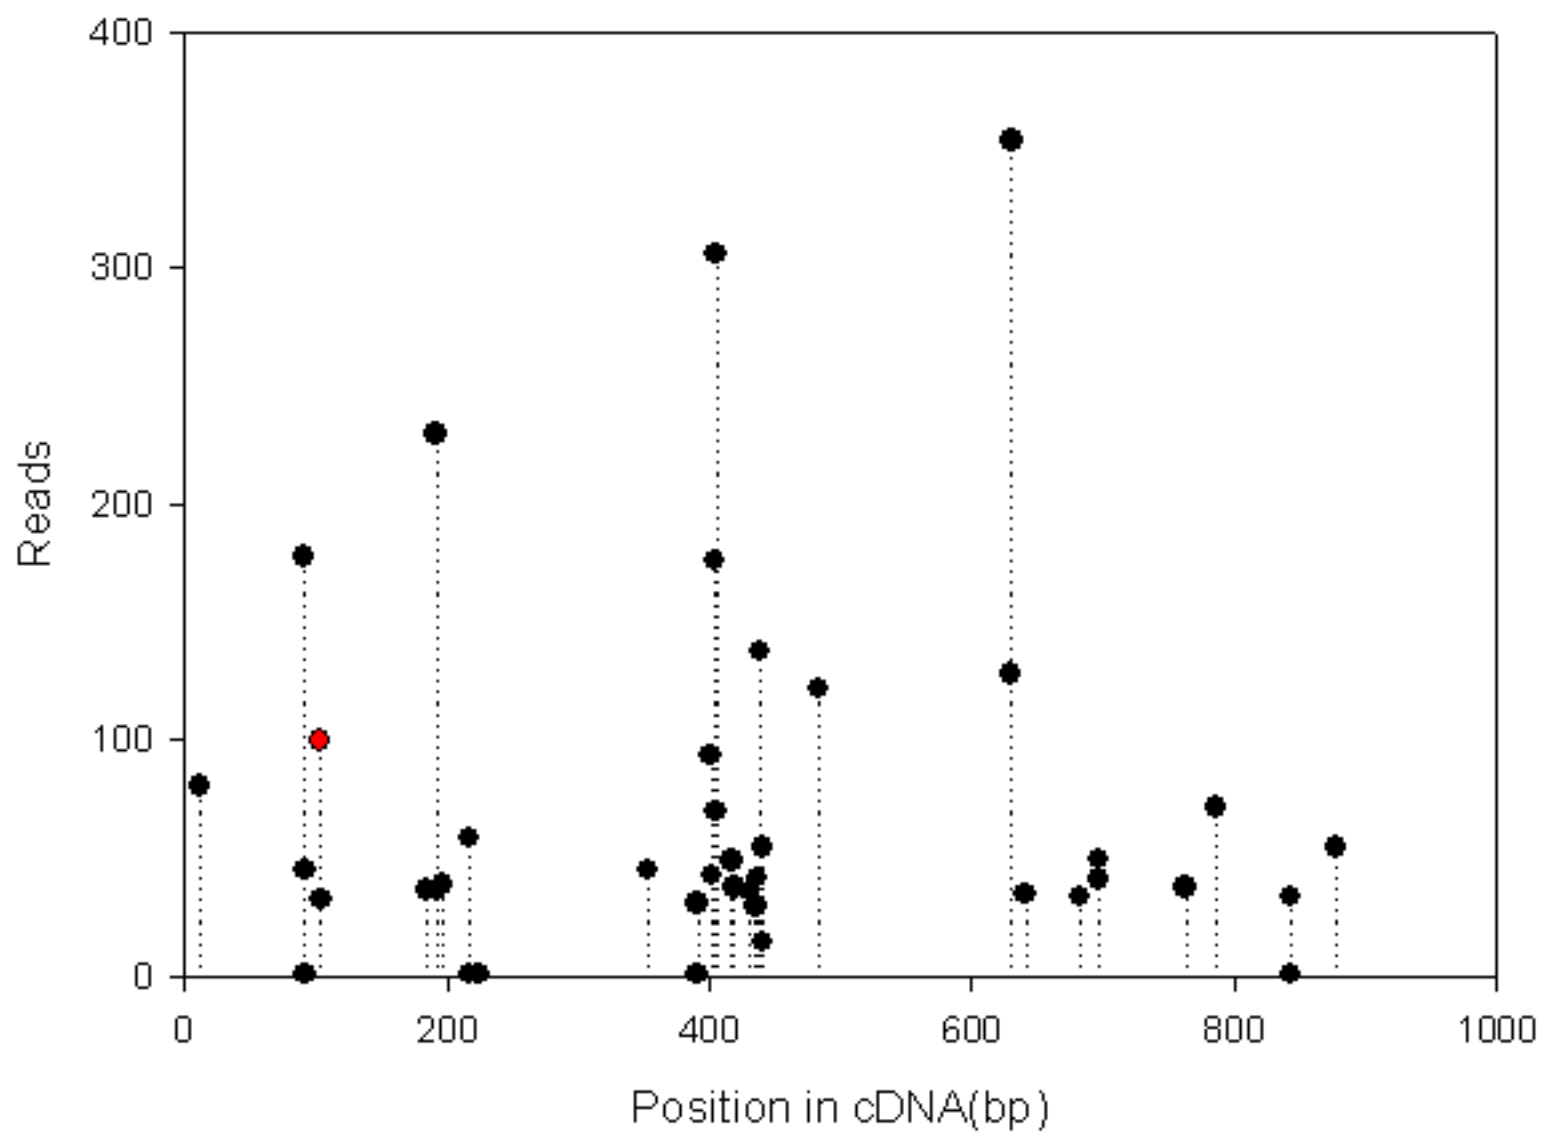

```

5' AUAGAGAAGAGCUCAGGAUGC-UGCUA 3'      Cs1g01190.1
      =  ::::::::::::::: ::::
3' -----UAAUCGGGUCCUACGAACGA- 5'      Csi-miRN24
  
```



Csi-miRN27,target=Cs4g18880.1 gene=Cs4g18880  
 Category:3  
 Score=4.5  
 Cleavage Site=3257

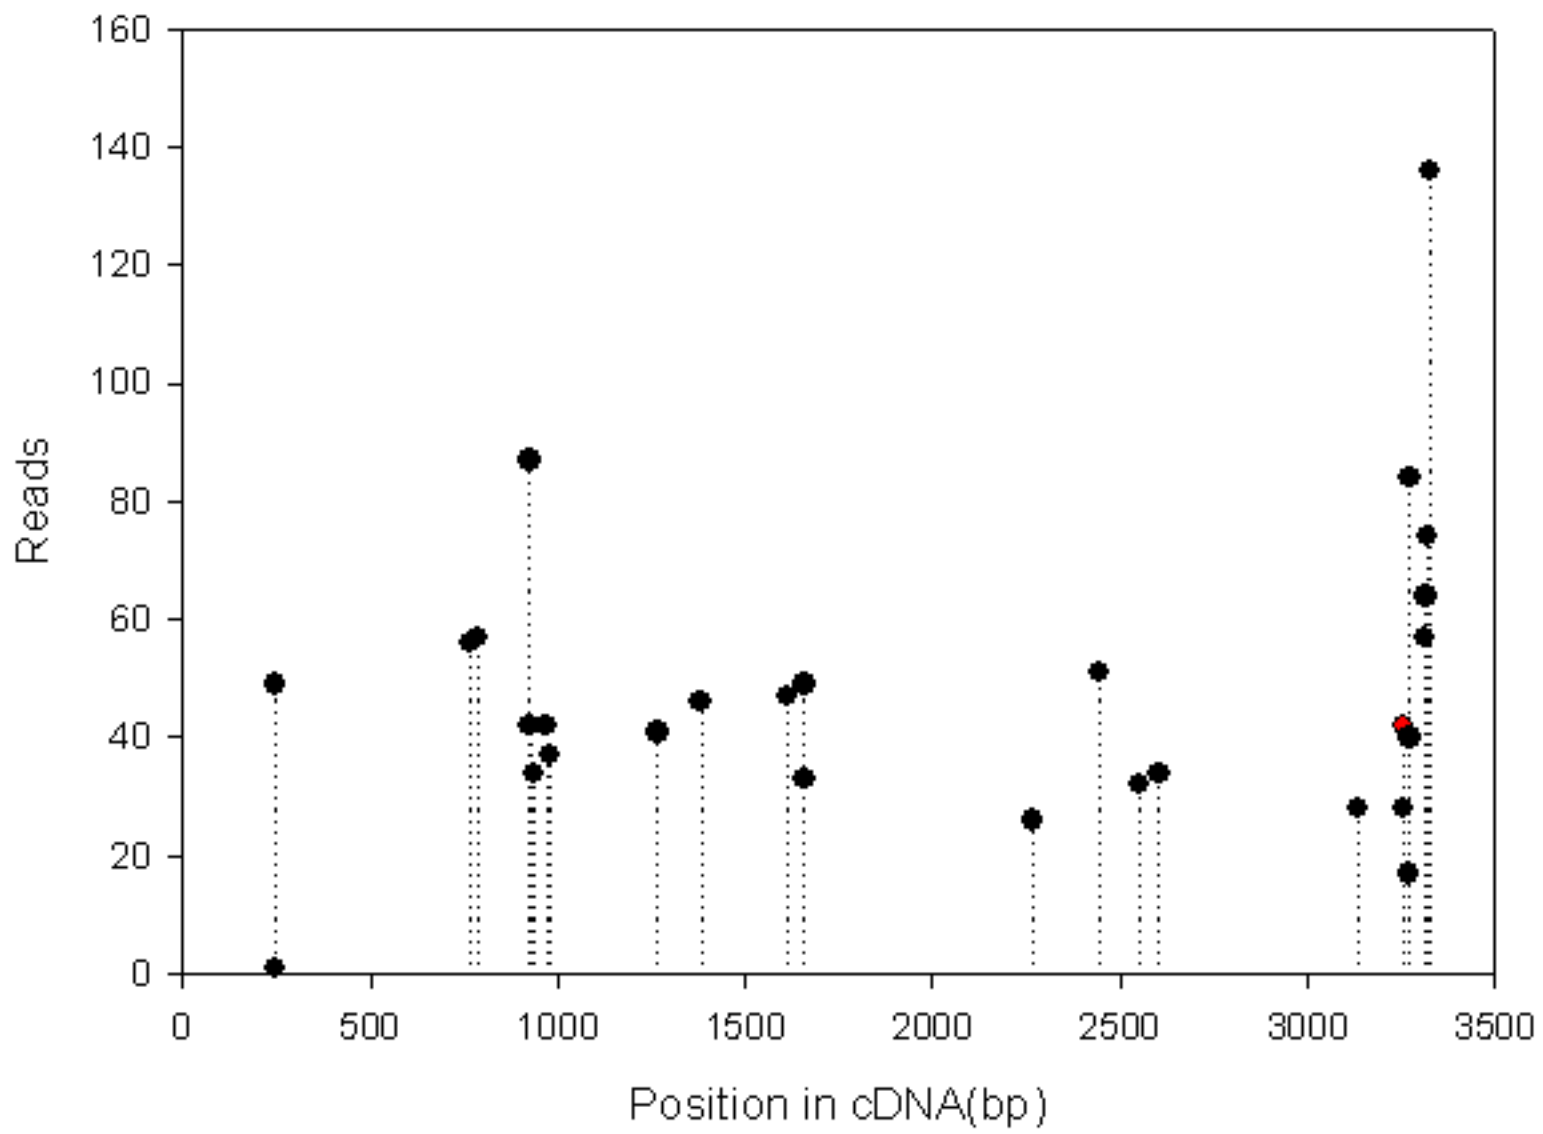

```

5' GCACGGUACUACAGUUGCAACAUAGC 3'      Cs4g18880.1
   :: :::::..: :::::~::~:
3' -AUGGCAUGGUGACAACGUUGUAU-- 5'      Csi-miRN27
  
```

Csi-miRN28, target=Cs4g15010.1 gene=Cs4g15010  
 Category:2  
 Score=4.5  
 Cleavage Site=765

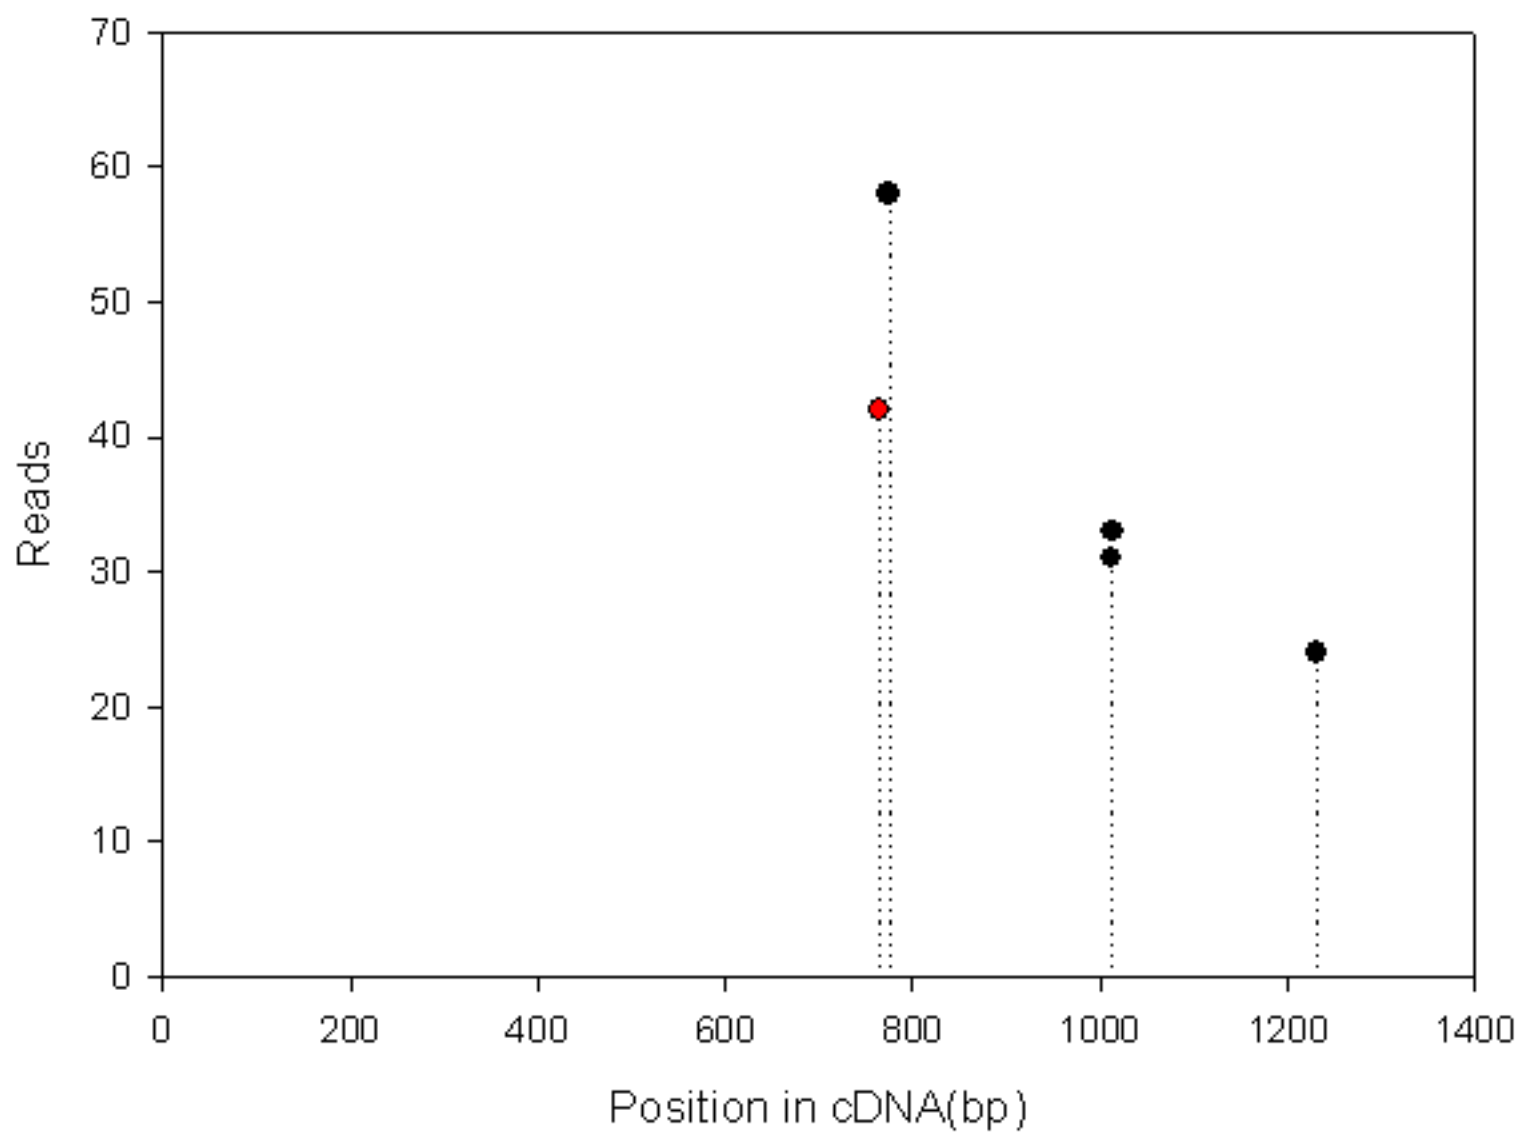

```

5' AGUACGAUCG-GCAGCUACUCCAAUA 3'      Cs4g15010.1
   :.:.: :.:.:.:.:.:.:.:.:.:.:.:.:
3' -----UGGCGCGUCGAUGAGGGGUAC 5'      Csi-miRN28
  
```

Csi-miRN37, target=Cs3g18880.2 gene=Cs3g18880  
 Category:2  
 Score=4.5  
 Cleavage Site=1309

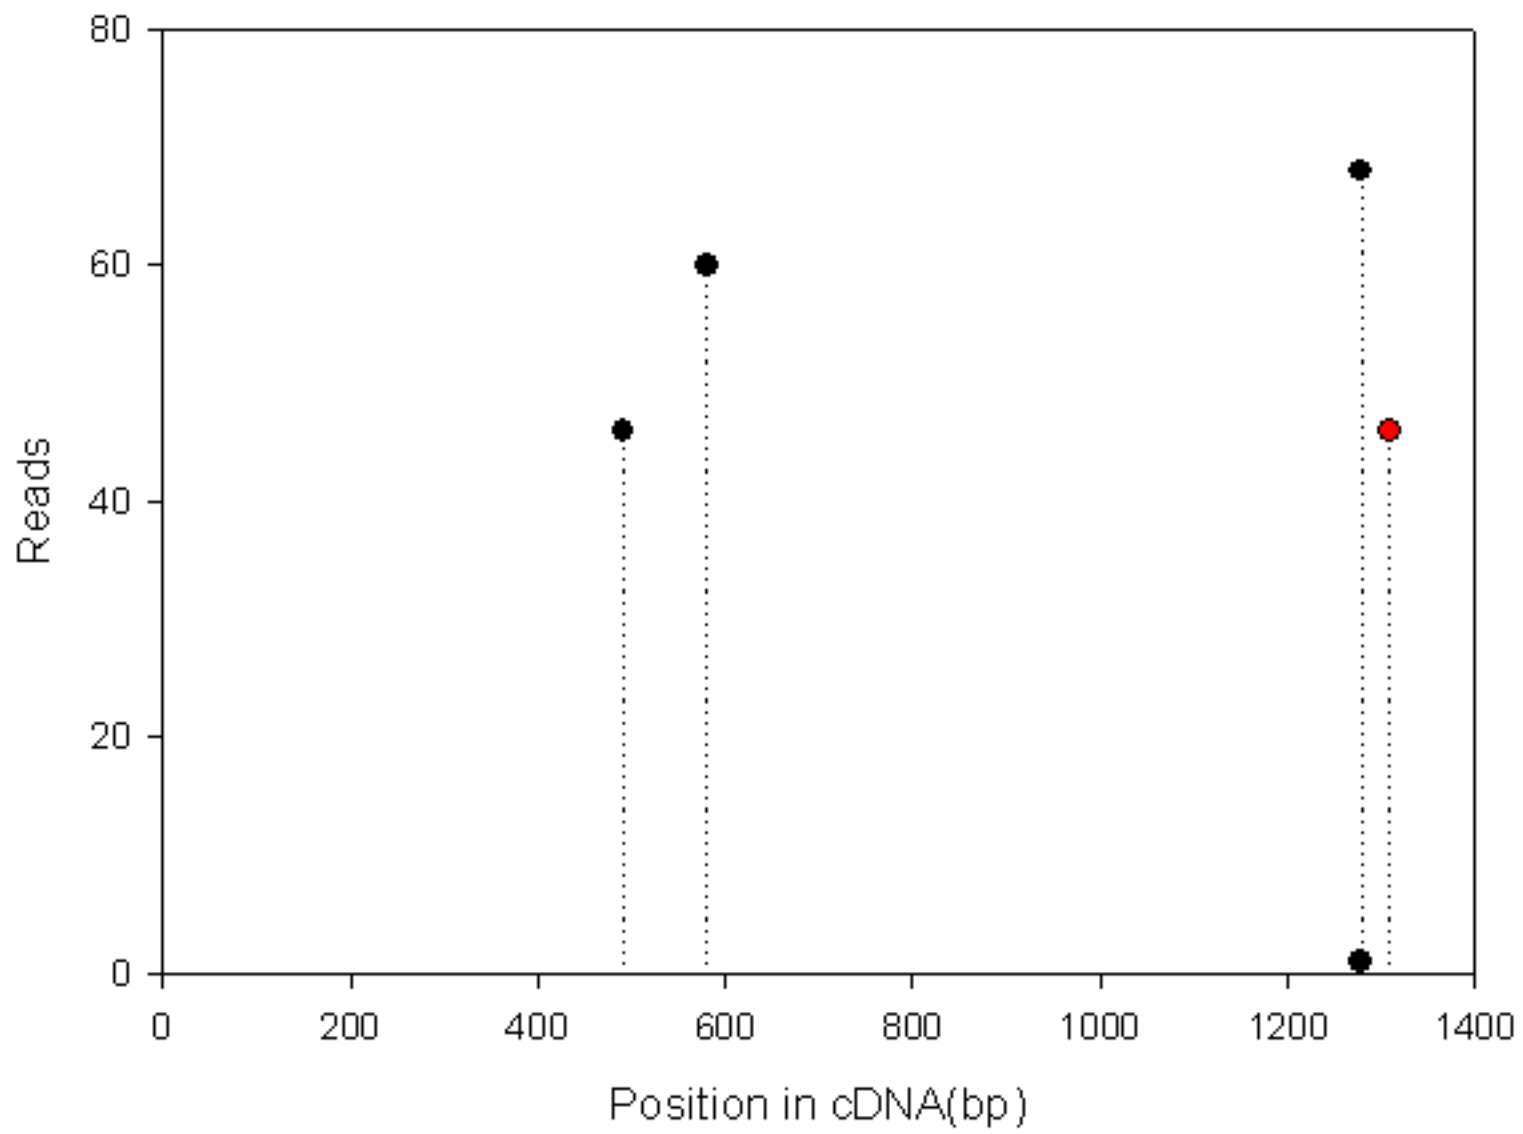

```

5' CACAACUCUCUCA-CUCUUCCCUCACU 3'      Cs3g18880.2
   ..  :::  :  ::::::::::::::
3' -----GGAAGAUUCGAGAAGGGAGU-- 5'      Csi-miRN37
  
```

Csi-miRN37, target=Cs7g08960.1 gene=Cs7g08960

Category:3

Score=5

Cleavage Site=442

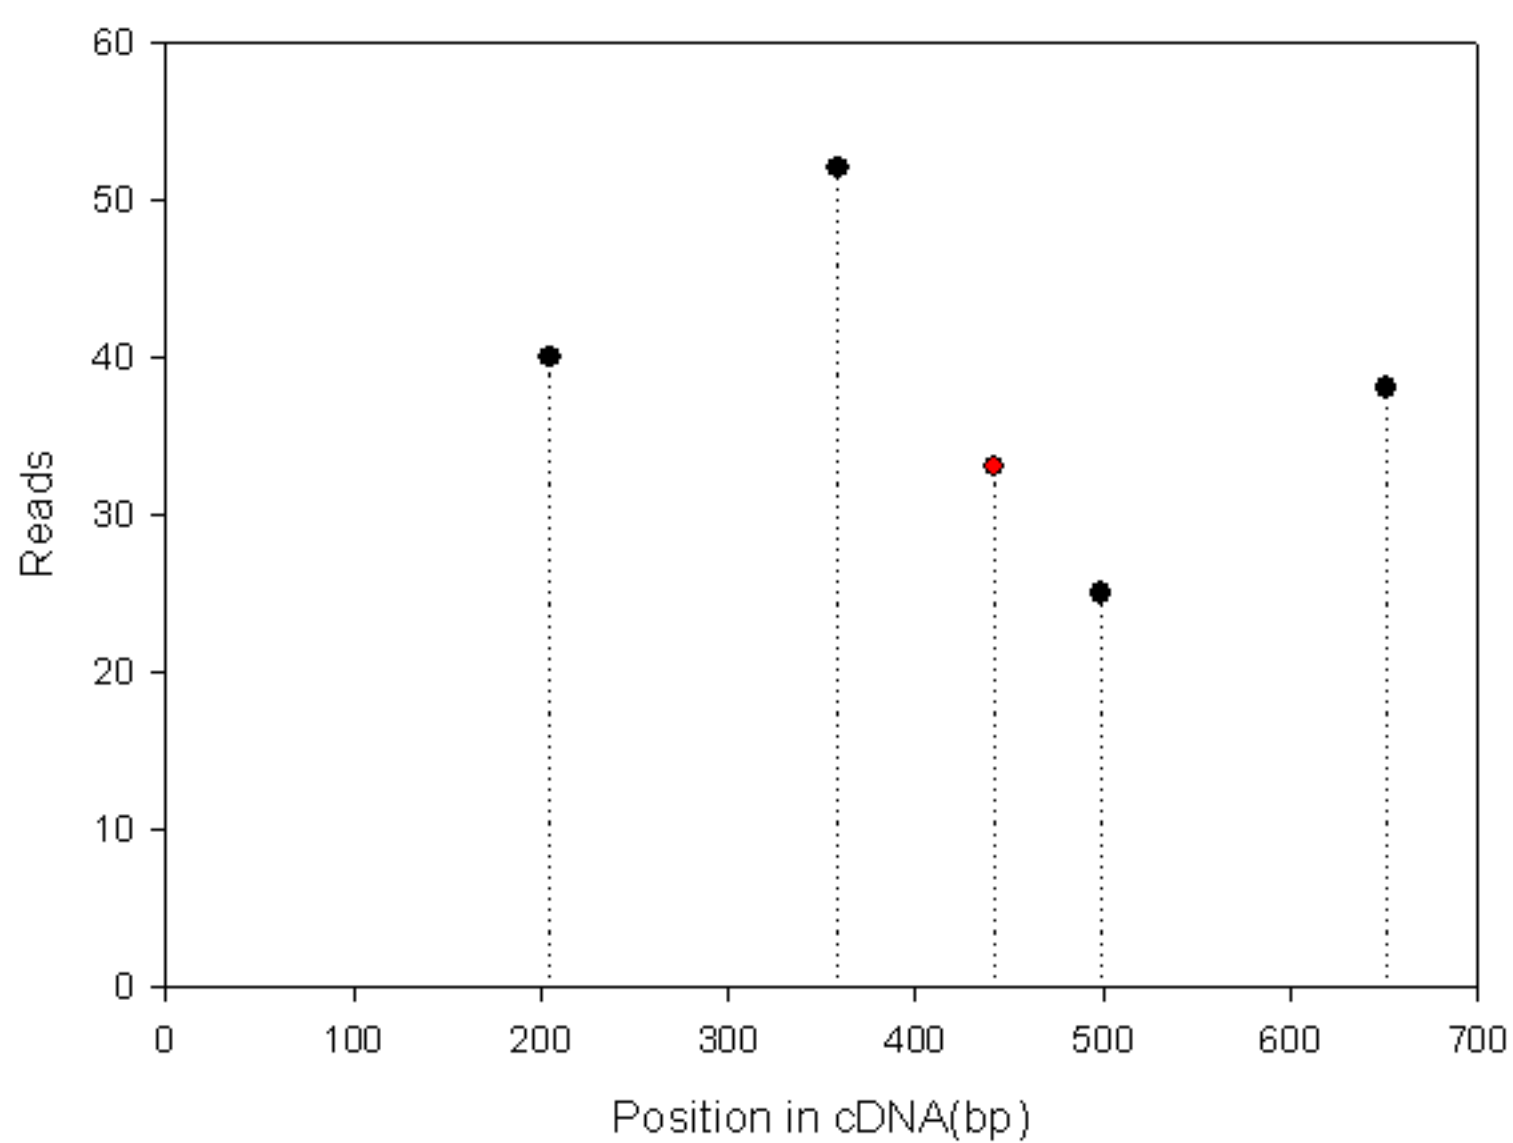

5' CUCUCGCCUCCAAGCUC-UCCUUCUC 3'

Cs7g08960.1

.....

3' -----GGAAGAUUCGAGAAGGGAGU- 5'

Csi-miRN37
