# Supplementary material for: Genome-wide comparison of microRNAs and their targeted transcripts among leaf, flower and fruit of sweet orange
Source: PubMed Central journal article supplement (PMC4158063; doi:10.1186/1471-2164-15-695), 2014-08-20
Supplement: 12864_2014_6413_MOESM7_ESM.pdf [file 12864_2014_6413_MOESM7_ESM.pdf]

**Additional file 7: Normalized count of secondary siRNAs and their targets identified using degradome sequencing in sweet orange.**

a. Normalized count<sup>a</sup> of secondary siRNAs in leaf and their targets identified using degradome sequencing

| Secondary siRNA                    | Normalized count <sup>a</sup> in leaf | Target            | Category |
|------------------------------------|---------------------------------------|-------------------|----------|
| Csi-miR167b.2-Cs2g09440.1-8        | 0.39                                  | Cs4g19850.1       | 3        |
| Csi-miR167b.2-Cs2g09440.1-9        | 0.39                                  | Cs2g12460.1       | 3        |
| Csi-miR167b.2-Cs2g09440.1-13       | 0.49                                  | Cs3g15060.1       | 3        |
| Csi-miR482a-3p-Cs5g18480.1-15      | 0.29                                  | Cs7g01530.1       | 3        |
| Csi-miR482a-3p-Cs5g18480.1-18      | 4.42                                  | Cs3g05730.1       | 1        |
| Csi-miR482a-3p-Cs5g18480.1-18      | 4.42                                  | Cs3g06120.1       | 1        |
| Csi-miR482a-3p-Cs5g18480.1-20      | 0.29                                  | Cs9g03090.1       | 3        |
| Csi-miR482a-3p-Cs5g18480.1-41      | 4.03                                  | Cs3g22270.2       | 2        |
| Csi-miR482a-3p-Cs5g18480.1-77      | 1.18                                  | Cs7g19320.2       | 3        |
| Csi-miR482a-3p-Cs5g19920.1-36      | 0.59                                  | Cs4g03050.1       | 3        |
| Csi-miR482a-3p-Cs5g19920.1-36      | 0.59                                  | Cs4g03140.1       | 3        |
| Csi-miR482c-Cs9g06846.1-5          | 1.67                                  | Cs9g08050.1       | 3        |
| Csi-miR482c-Cs9g06846.1-10         | 0.88                                  | Cs2g30790.2       | 2        |
| Csi-miR482c-Cs9g06846.1-15         | 2.36                                  | Cs1g16450.1       | 2        |
| Csi-miR482c-Cs9g06846.1-22         | 31.84                                 | Cs5g19660.1       | 3        |
| Csi-miR2118.1-orange1.1t02171.1-12 | 0.29                                  | Cs7g21420.1       | 2        |
| Csi-miR2118.1-orange1.1t02171.1-21 | 0.39                                  | Cs9g08950.1       | 3        |
| Csi-miR2118.1-orange1.1t02171.1-30 | 0.39                                  | Cs1g22190.1       | 2        |
| Csi-miR2118.1-orange1.1t02175.1-85 | 0.39                                  | Cs6g16200.1       | 3        |
| Csi-miR2118.1-orange1.1t02175.1-85 | 0.39                                  | Cs3g06440.1       | 3        |
| Csi-miR3954a-Cs1g09600.1-7         | 3.15                                  | Cs2g11250.1       | 3        |
| Csi-miR3954a-Cs1g09600.1-9         | 0.39                                  | Cs2g04220.1       | 3        |
| Csi-miR3954a-Cs1g09600.1-9         | 0.39                                  | Cs3g07100.1       | 3        |
| Csi-miR3954a-Cs1g09635.1-7         | 14.35                                 | Cs4g11930.1       | 3        |
| Csi-miR3954a-Cs1g09635.1-9         | 0.39                                  | Cs2g11990.1       | 1        |
| Csi-miR3954a-Cs1g09635.1-9         | 0.39                                  | Cs5g11880.1       | 3        |
| Csi-miR3954a-Cs5g04670.1-10        | 0.39                                  | Cs4g17040.1       | 2        |
| Csi-miR3954a-Cs5g04670.1-13        | 0.39                                  | Cs7g13090.1       | 3        |
| Csi-miR3954a-Cs5g04670.1-16        | 0.39                                  | Cs9g03100.1       | 3        |
| Csi-miR3954a-Cs5g04670.1-21        | 1.18                                  | Cs3g25700.1       | 3        |
| Csi-miR3954a-Cs7g22460.1-2         | 1.18                                  | Cs3g07280.1       | 2        |
| Csi-miR3954a-Cs7g22460.1-2         | 1.18                                  | Cs6g18000.1       | 3        |
| Csi-miR3954a-Cs7g22460.1-8         | 0.69                                  | Cs9g06660.1       | 3        |
| Csi-miR3954a-Cs7g22460.1-15        | 0.49                                  | Cs7g06320.1       | 3        |
| Csi-miRN20-Cs3g05320.1-4           | 1.67                                  | Cs5g18400.1       | 2        |
| Csi-miRN20-Cs3g05320.1-23          | 87.57                                 | Cs7g19800.1       | 3        |
| Csi-miRN20-Cs3g05320.1-24          | 2.95                                  | Cs1g12760.1       | 1        |
| Csi-miRN20-Cs3g05320.1-26          | 20.35                                 | Cs1g15370.1       | 3        |
| Csi-miRN20-Cs3g05320.1-26          | 20.35                                 | Cs3g15060.1       | 3        |
| Csi-miRN20-Cs3g05320.1-26          | 20.35                                 | Cs6g18830.1       | 3        |
| Csi-miRN20-Cs3g05320.1-36          | 0.59                                  | orange1.1t00530.2 | 3        |

|                           |       |                   |   |
|---------------------------|-------|-------------------|---|
| Csi-miRN20-Cs3g05320.1-65 | 10.42 | Cs3g01450.1       | 3 |
| Csi-miRN20-Cs3g05320.1-65 | 10.42 | orange1.1t01632.1 | 3 |

b. Normalized count<sup>a</sup> of secondary siRNAs in flower and their targets identified using degradome sequencing

| Secondary siRNA             | Normalized count <sup>a</sup> in flower | Target            | Category |
|-----------------------------|-----------------------------------------|-------------------|----------|
| Csi-miR482c-Cs9g06846.1-5   | 0.76                                    | Cs9g08050.1       | 3        |
| Csi-miR482c-Cs9g06846.1-6   | 7.35                                    | Cs7g31270.1       | 3        |
| Csi-miR482c-Cs9g06846.1-15  | 1.73                                    | Cs1g16450.1       | 3        |
| Csi-miR3954a-Cs1g09635.1-5  | 0.32                                    | Cs1g01010.1       | 3        |
| Csi-miR3954a-Cs1g09635.1-5  | 0.32                                    | orange1.1t03220.1 | 3        |
| Csi-miR3954a-Cs1g09635.1-5  | 0.32                                    | Cs5g24790.1       | 3        |
| Csi-miR3954a-Cs1g09635.1-7  | 33.61                                   | Cs4g11930.1       | 3        |
| Csi-miR3954a-Cs1g09635.1-7  | 33.61                                   | Cs9g18330.1       | 2        |
| Csi-miR3954a-Cs1g09635.1-9  | 0.43                                    | Cs5g11880.1       | 2        |
| Csi-miR3954a-Cs1g09635.1-9  | 0.43                                    | Cs2g17600.1       | 2        |
| Csi-miR3954a-Cs1g09635.1-9  | 0.43                                    | Cs2g17570.1       | 3        |
| Csi-miR3954a-Cs5g04670.1-21 | 0.32                                    | Cs5g09880.1       | 3        |
| Csi-miRN20-Cs3g05320.1-14   | 0.54                                    | Cs8g19960.1       | 2        |
| Csi-miRN20-Cs3g05320.1-16   | 2.81                                    | Cs9g03400.1       | 3        |
| Csi-miRN20-Cs3g05320.1-19   | 0.43                                    | Cs7g05730.1       | 1        |
| Csi-miRN20-Cs3g05320.1-4    | 1.08                                    | Cs5g05630.1       | 2        |
| Csi-miRN20-Cs3g05320.1-4    | 1.08                                    | Cs5g18400.1       | 2        |
| Csi-miRN20-Cs3g05320.1-9    | 0.32                                    | Cs3g26640.1       | 3        |
| Csi-miRN20-Cs3g05320.1-24   | 2.81                                    | orange1.1t00622.1 | 2        |
| Csi-miRN20-Cs3g05320.1-24   | 2.81                                    | orange1.1t01948.1 | 3        |
| Csi-miRN20-Cs3g05320.1-24   | 2.81                                    | Cs1g12760.1       | 2        |
| Csi-miRN20-Cs3g05320.1-26   | 26.48                                   | Cs3g11480.1       | 3        |
| Csi-miRN20-Cs3g05320.1-26   | 26.48                                   | Cs6g18830.1       | 3        |

c. Normalized count<sup>a</sup> of secondary siRNAs in fruit and their targets identified using degradome sequencing

| Secondary siRNA                     | Normalized count <sup>a</sup> in flower | Target            | Category |
|-------------------------------------|-----------------------------------------|-------------------|----------|
| csi-miR482a-3p-Cs1g15550.1-4        | 12.88                                   | Cs8g11330.1       | 3        |
| csi-miR482a-3p-Cs3g13340.1-20       | 1.68                                    | Cs2g11470.1       | 3        |
| csi-miR482a-3p-Cs3g13340.1-20       | 1.68                                    | Cs1g07080.1       | 3        |
| csi-miR482a-3p-Cs3g13340.1-35       | 3.92                                    | orange1.1t02629.1 | 3        |
| csi-miR482a-3p-orange1.1t01918.1-6  | 3.92                                    | Cs6g02560.1       | 3        |
| csi-miR482a-3p-orange1.1t01918.1-29 | 2.8                                     | Cs2g21880.1       | 3        |
| csi-miR482a-3p-orange1.1t01918.1-29 | 2.8                                     | orange1.1t03281.1 | 2        |
| csi-miR482a-3p-orange1.1t01918.1-29 | 2.8                                     | Cs8g02370.1       | 1        |
| csi-miR827.2-Cs5g10180.1-14         | 8.4                                     | Cs7g18380.1       | 3        |
| csi-miRN20-Cs3g05320.1-12           | 1.68                                    | Cs1g17610.1       | 3        |
| csi-miRN20-Cs3g05320.1-12           | 1.68                                    | Cs2g28240.1       | 3        |

|                           |       |             |   |
|---------------------------|-------|-------------|---|
| csi-miRN20-Cs3g05320.1-23 | 10.64 | Cs7g19680.1 | 3 |
| csi-miRN20-Cs3g05320.1-26 | 6.16  | Cs6g18830.1 | 3 |
| csi-miRN20-Cs3g05320.1-26 | 6.16  | Cs2g16940.1 | 3 |

---

Normalized count<sup>a</sup>: The counts of secondary siRNAs were normalized to transcripts per million (TPM)
