# Supplementary material for: Genome-wide comparison of microRNAs and their targeted transcripts among leaf, flower and fruit of sweet orange
Source: PubMed Central journal article supplement (PMC4158063; doi:10.1186/1471-2164-15-695), 2014-08-20
Supplement: 12864_2014_6413_MOESM8_ESM.pdf [file 12864_2014_6413_MOESM8_ESM.pdf]

**Additional file 8: T-plots of the targets of secondary siRNAs in different tissues. Densities of the 5' positions of degradome tags matching each target gene are shown as T-plots. The miRNA mediated degradome tag is highlighted in red.**

**T-plots for targets of  
secondary siRNAs  
in leaf**

Csi-miR167b.2-Cs2g09440.1-13, target=Cs3g15060.1 gene=Cs3g15060

Category:3

Score:4.5

Cleavage site:423

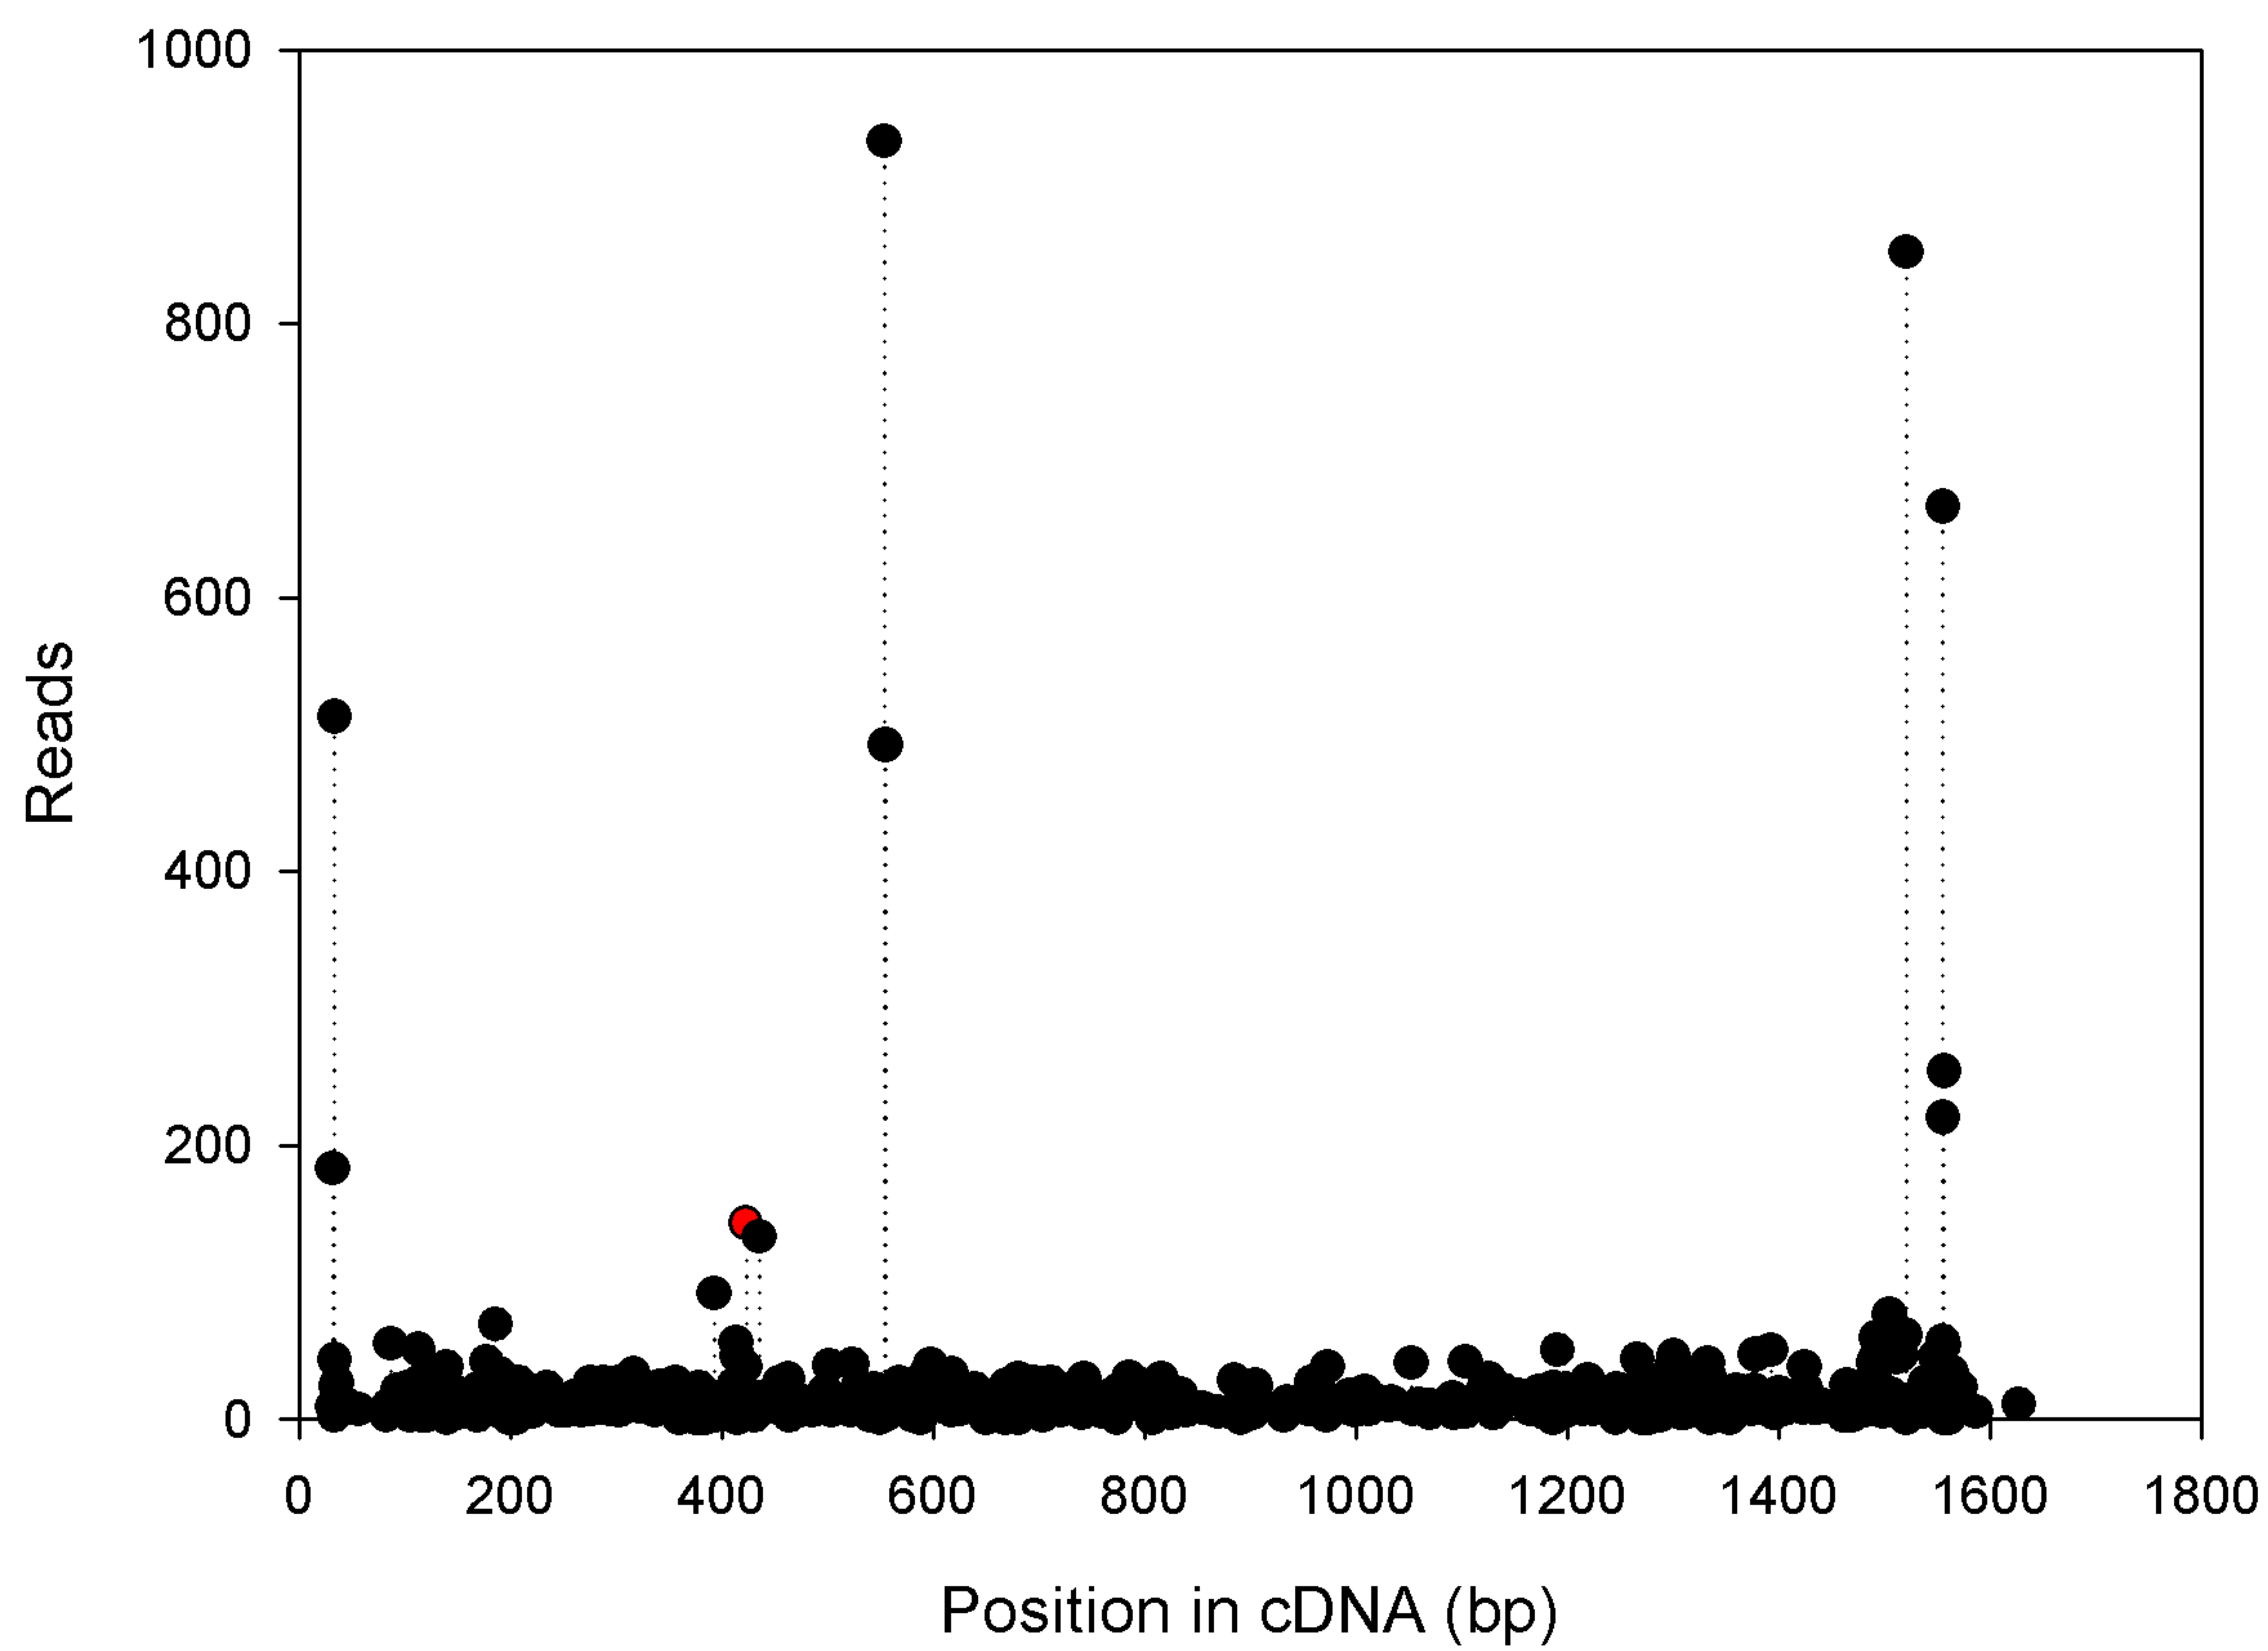

5' UUAGUGGCGAAGUUGAUCAGAAGAAA 3'

Cs3g15060.1

: ::: :::::::::::::::

3' --UGACCAAUUUAACUAGUCUUU--- 5'

Csi-miR167b.2-Cs2g09440.1-13

Csi-miR167b.2-Cs2g09440.1-8, target=Cs4g19850.1 gene=Cs4g19850  
 Category:3  
 Score:5  
 Cleavage site:1244

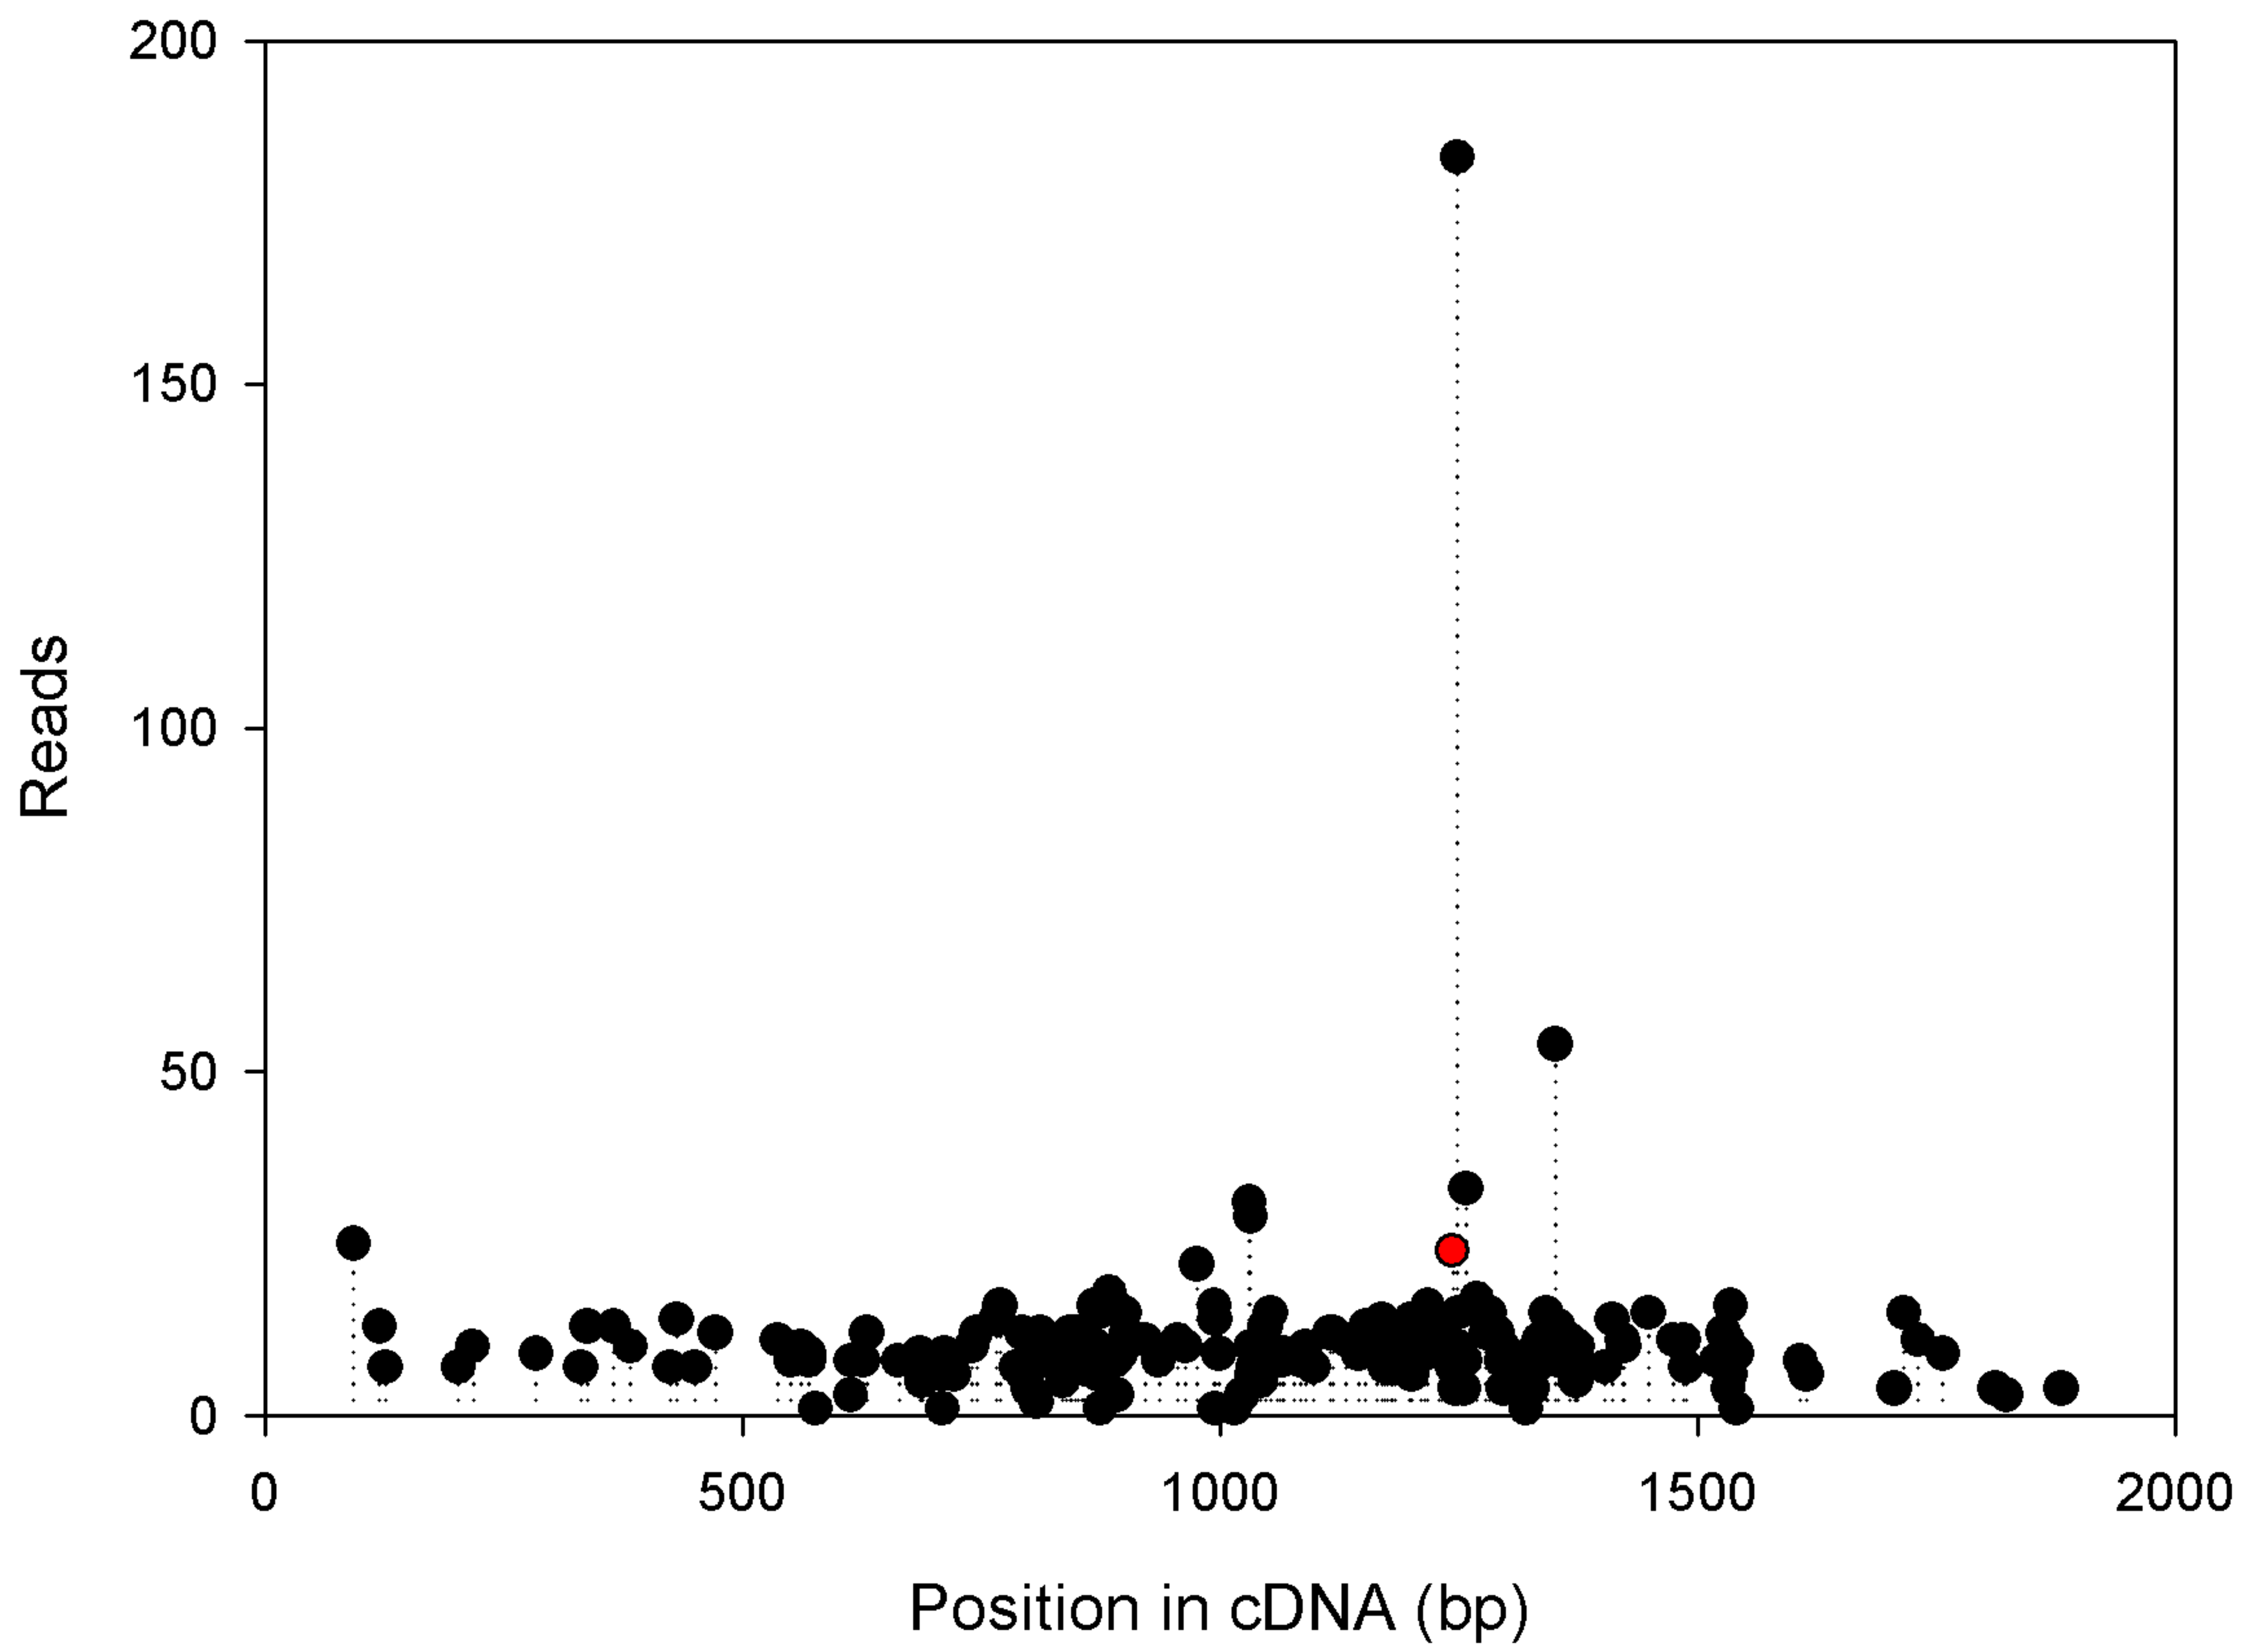

|                                  |                             |
|----------------------------------|-----------------------------|
| 5' CAUCGACUUCAAAAUUGGAGCUGAGU 3' | Cs4g19850.1                 |
| . . . . . : : : : : . . . . .    |                             |
| 3' ----UCGGAGACUUAACCUUGACUC- 5' | Csi-miR167b.2-Cs2g09440.1-8 |

Csi-miR167b.2-Cs2g09440.1-9, target=Cs2g12460.1 gene=Cs2g12460  
 Category:3  
 Score:5  
 Cleavage site:1047

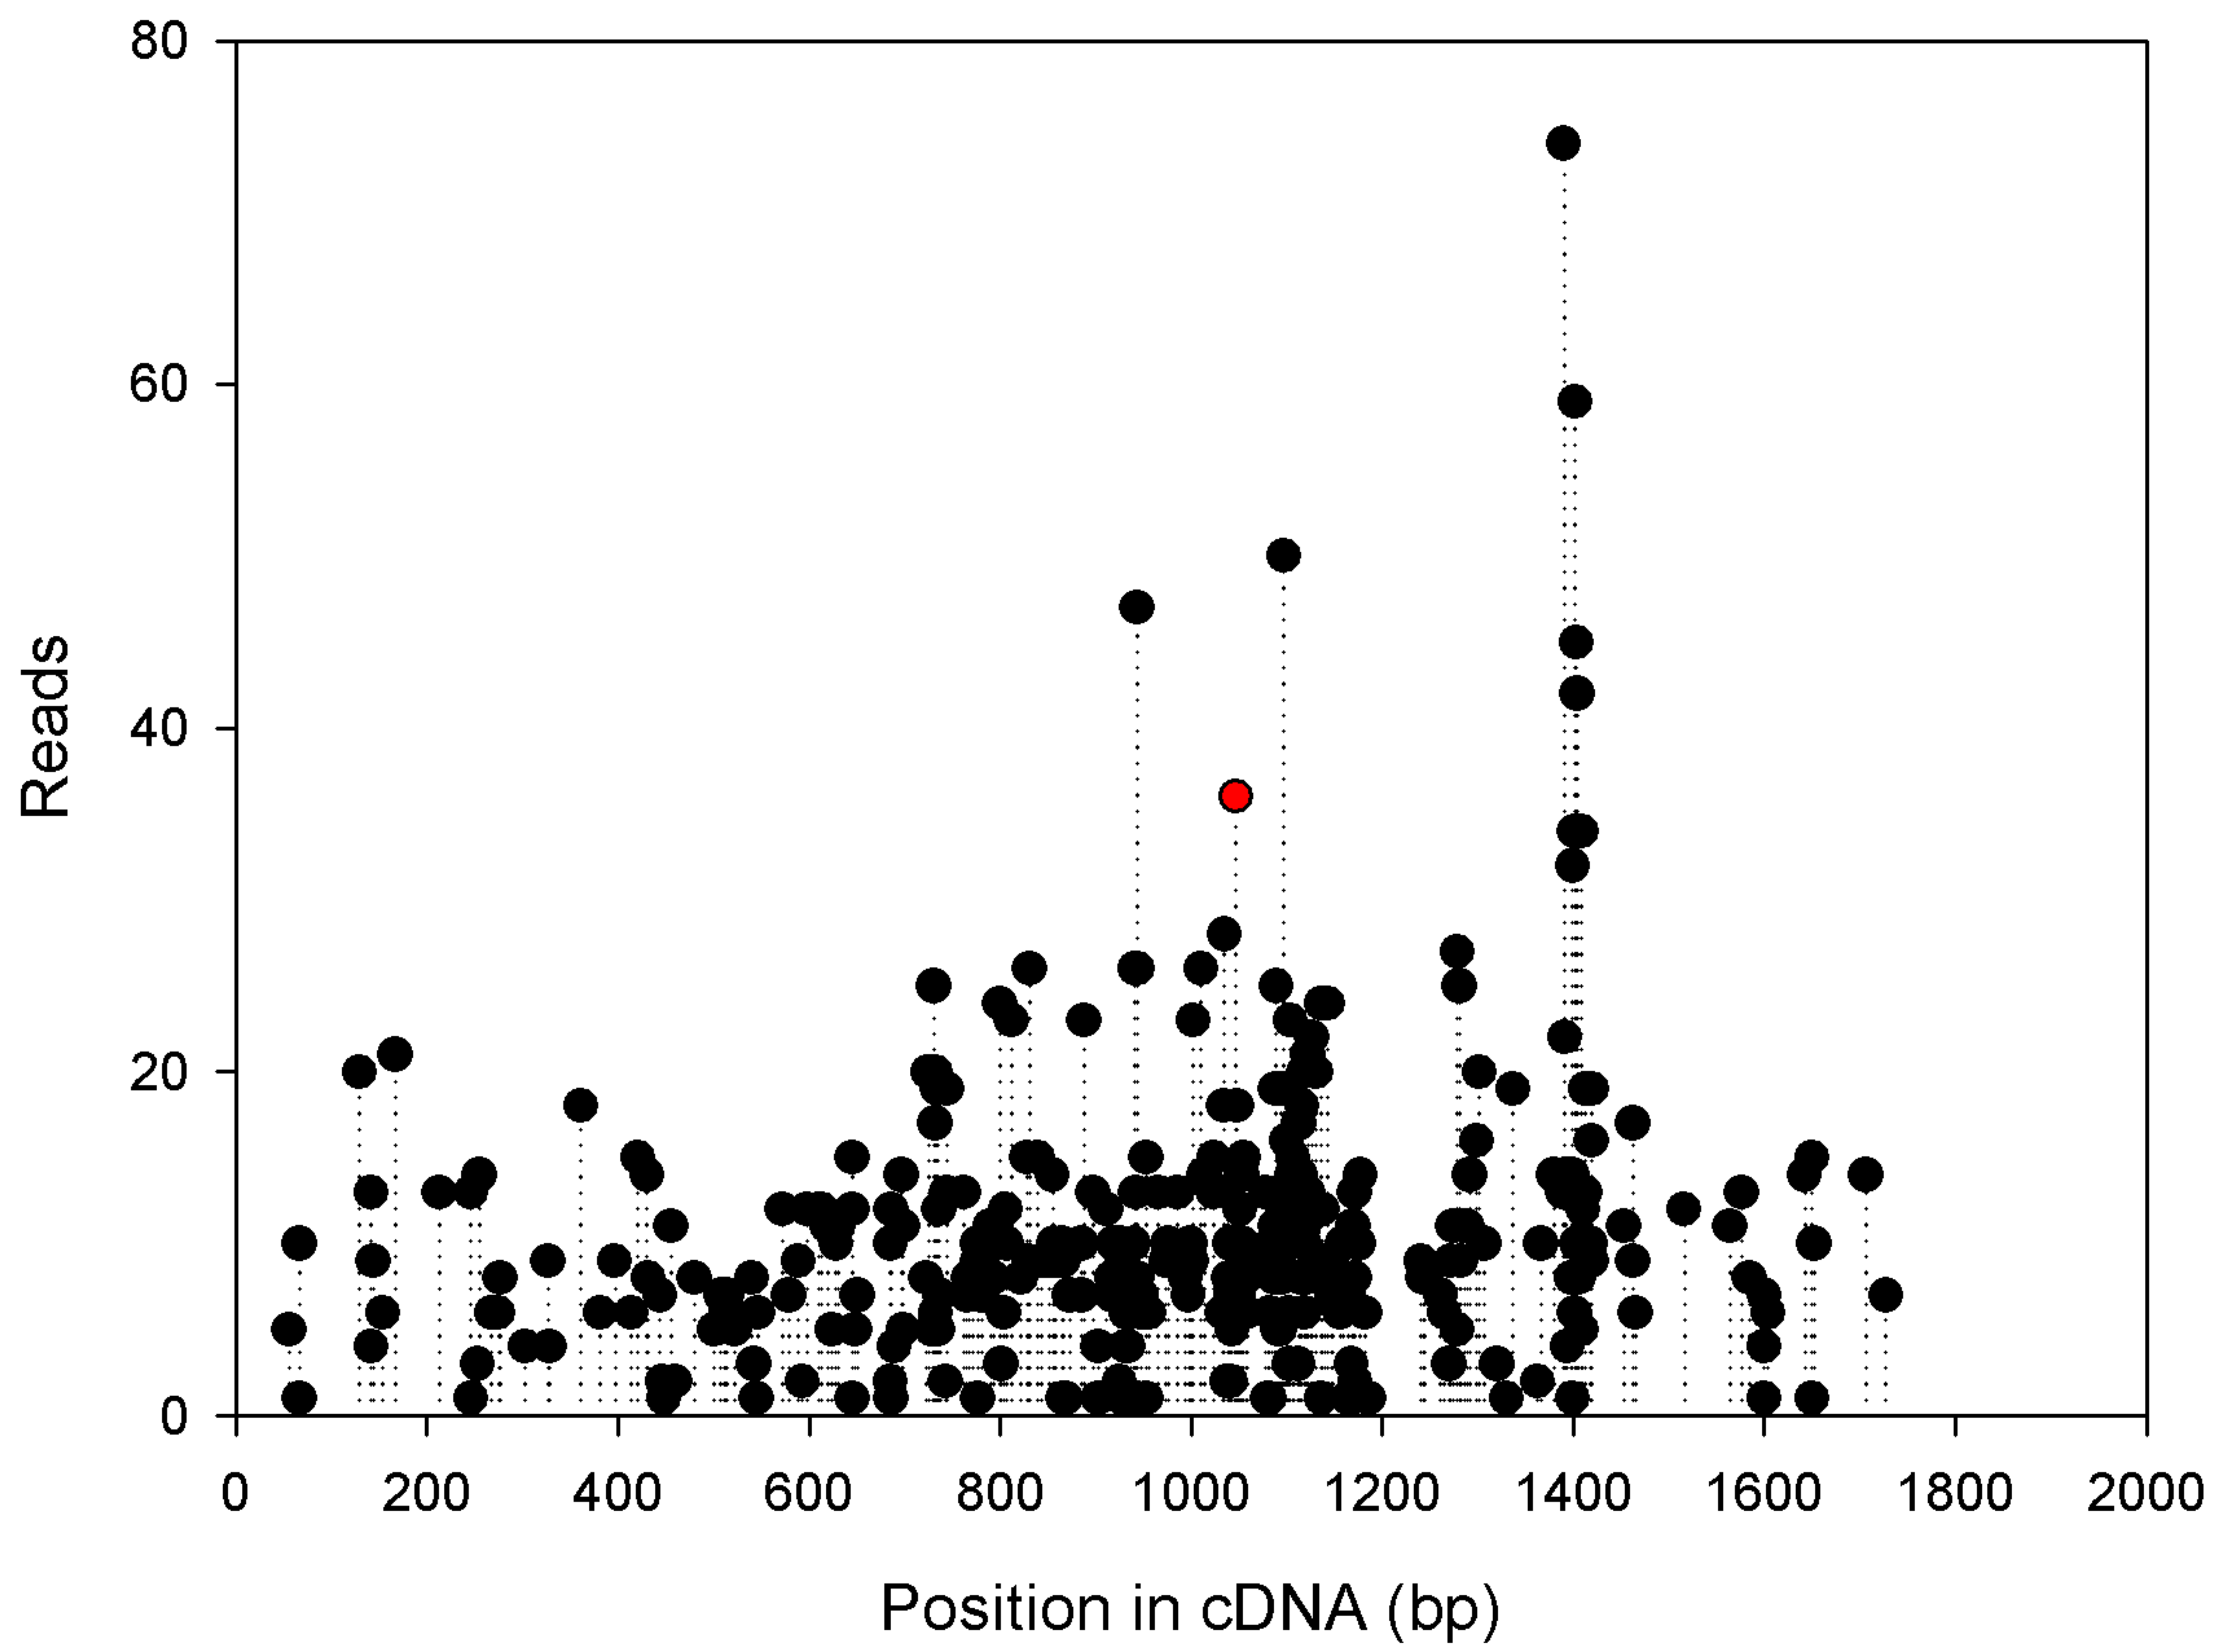

5' AAACAUCAGCCGCGUCUGUUGGUGUU 3'  
 ::::: : ::::::::::::::: :  
 3' --AGUAGU-GUCGACGACAACCUC-- 5'

Cs2g12460.1

Csi-miR167b.2-Cs2g09440.1-9

Csi-miR2118.1-Orange1.1t02171.1-12, target=Cs7g21420.1 gene=Cs7g21420  
 Category:2  
 Score:4.5  
 Cleavage site:2399

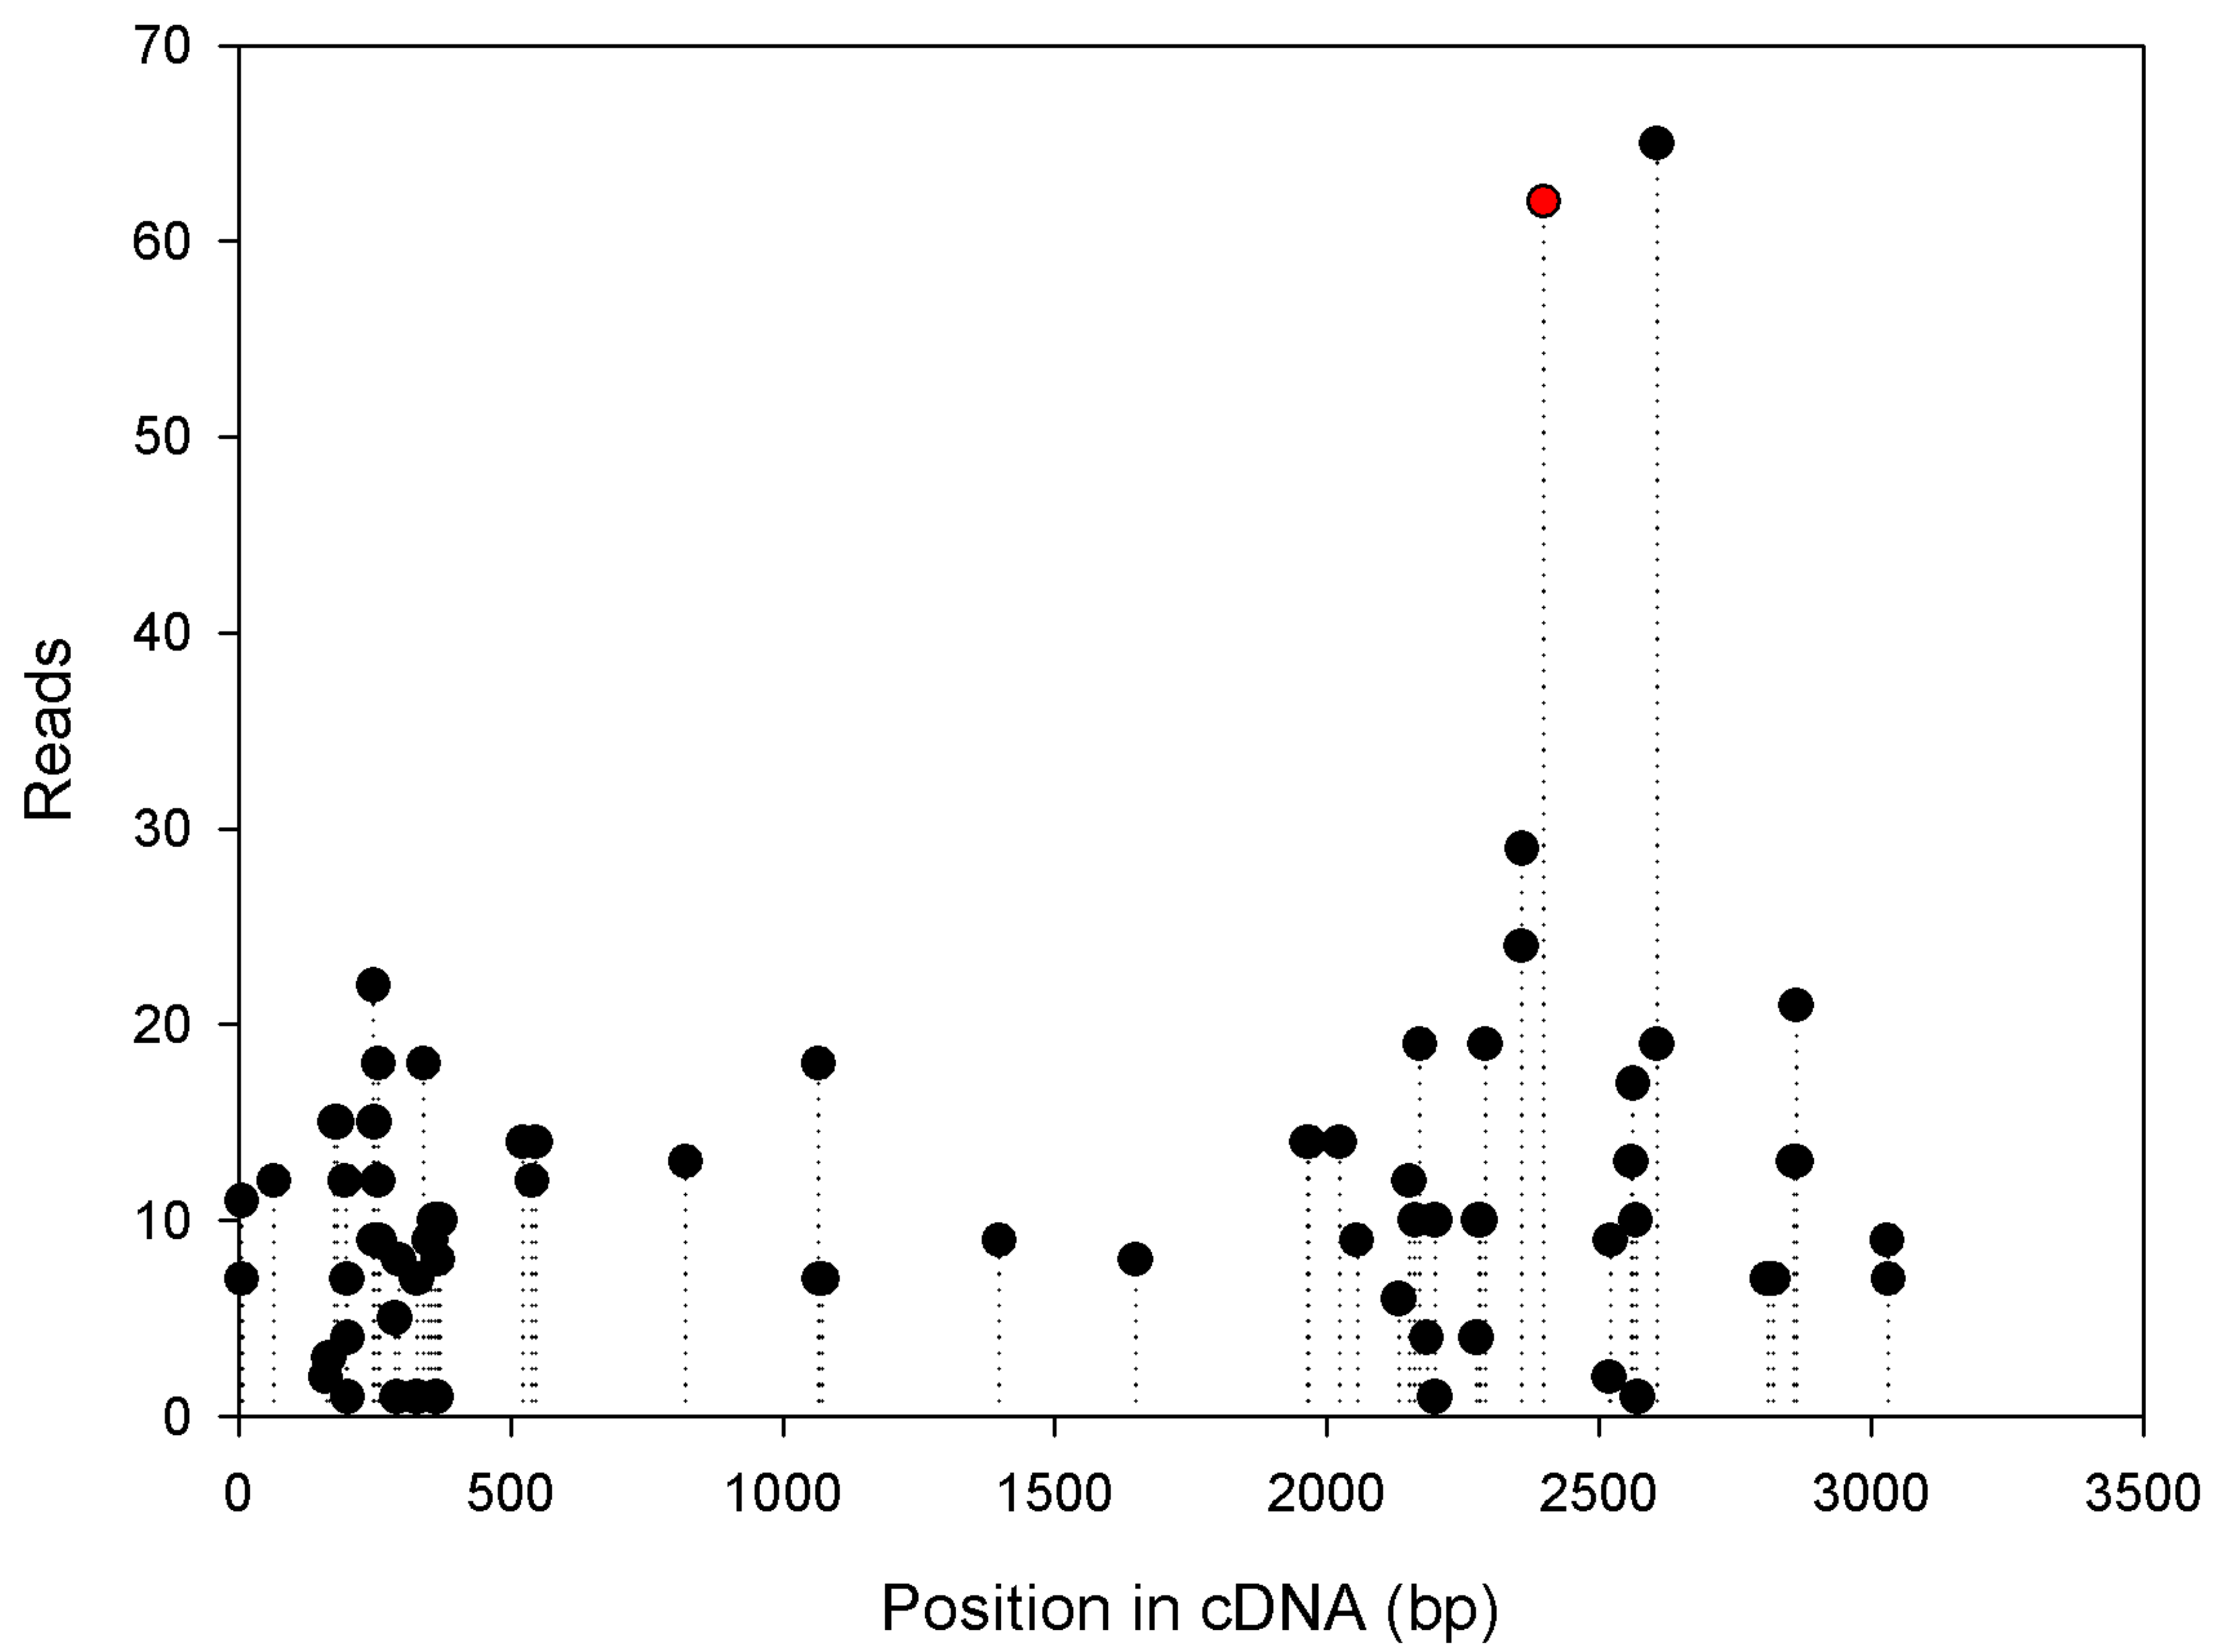

5' ACGCUUUGUC-AUACUUACAUCAC 3'

Cs7g21420.1

.....

3' -----GGUAGAAAUGAGUGUAGUAGU- 5'

Csi-miR2118.1-Orange1.1t02171.1-12

Csi-miR2118.1-Orange1.1t02171.1-21, target=Cs9g08950.1 gene=Cs9g08950  
 Category:3  
 Score:4.5  
 Cleavage site:624

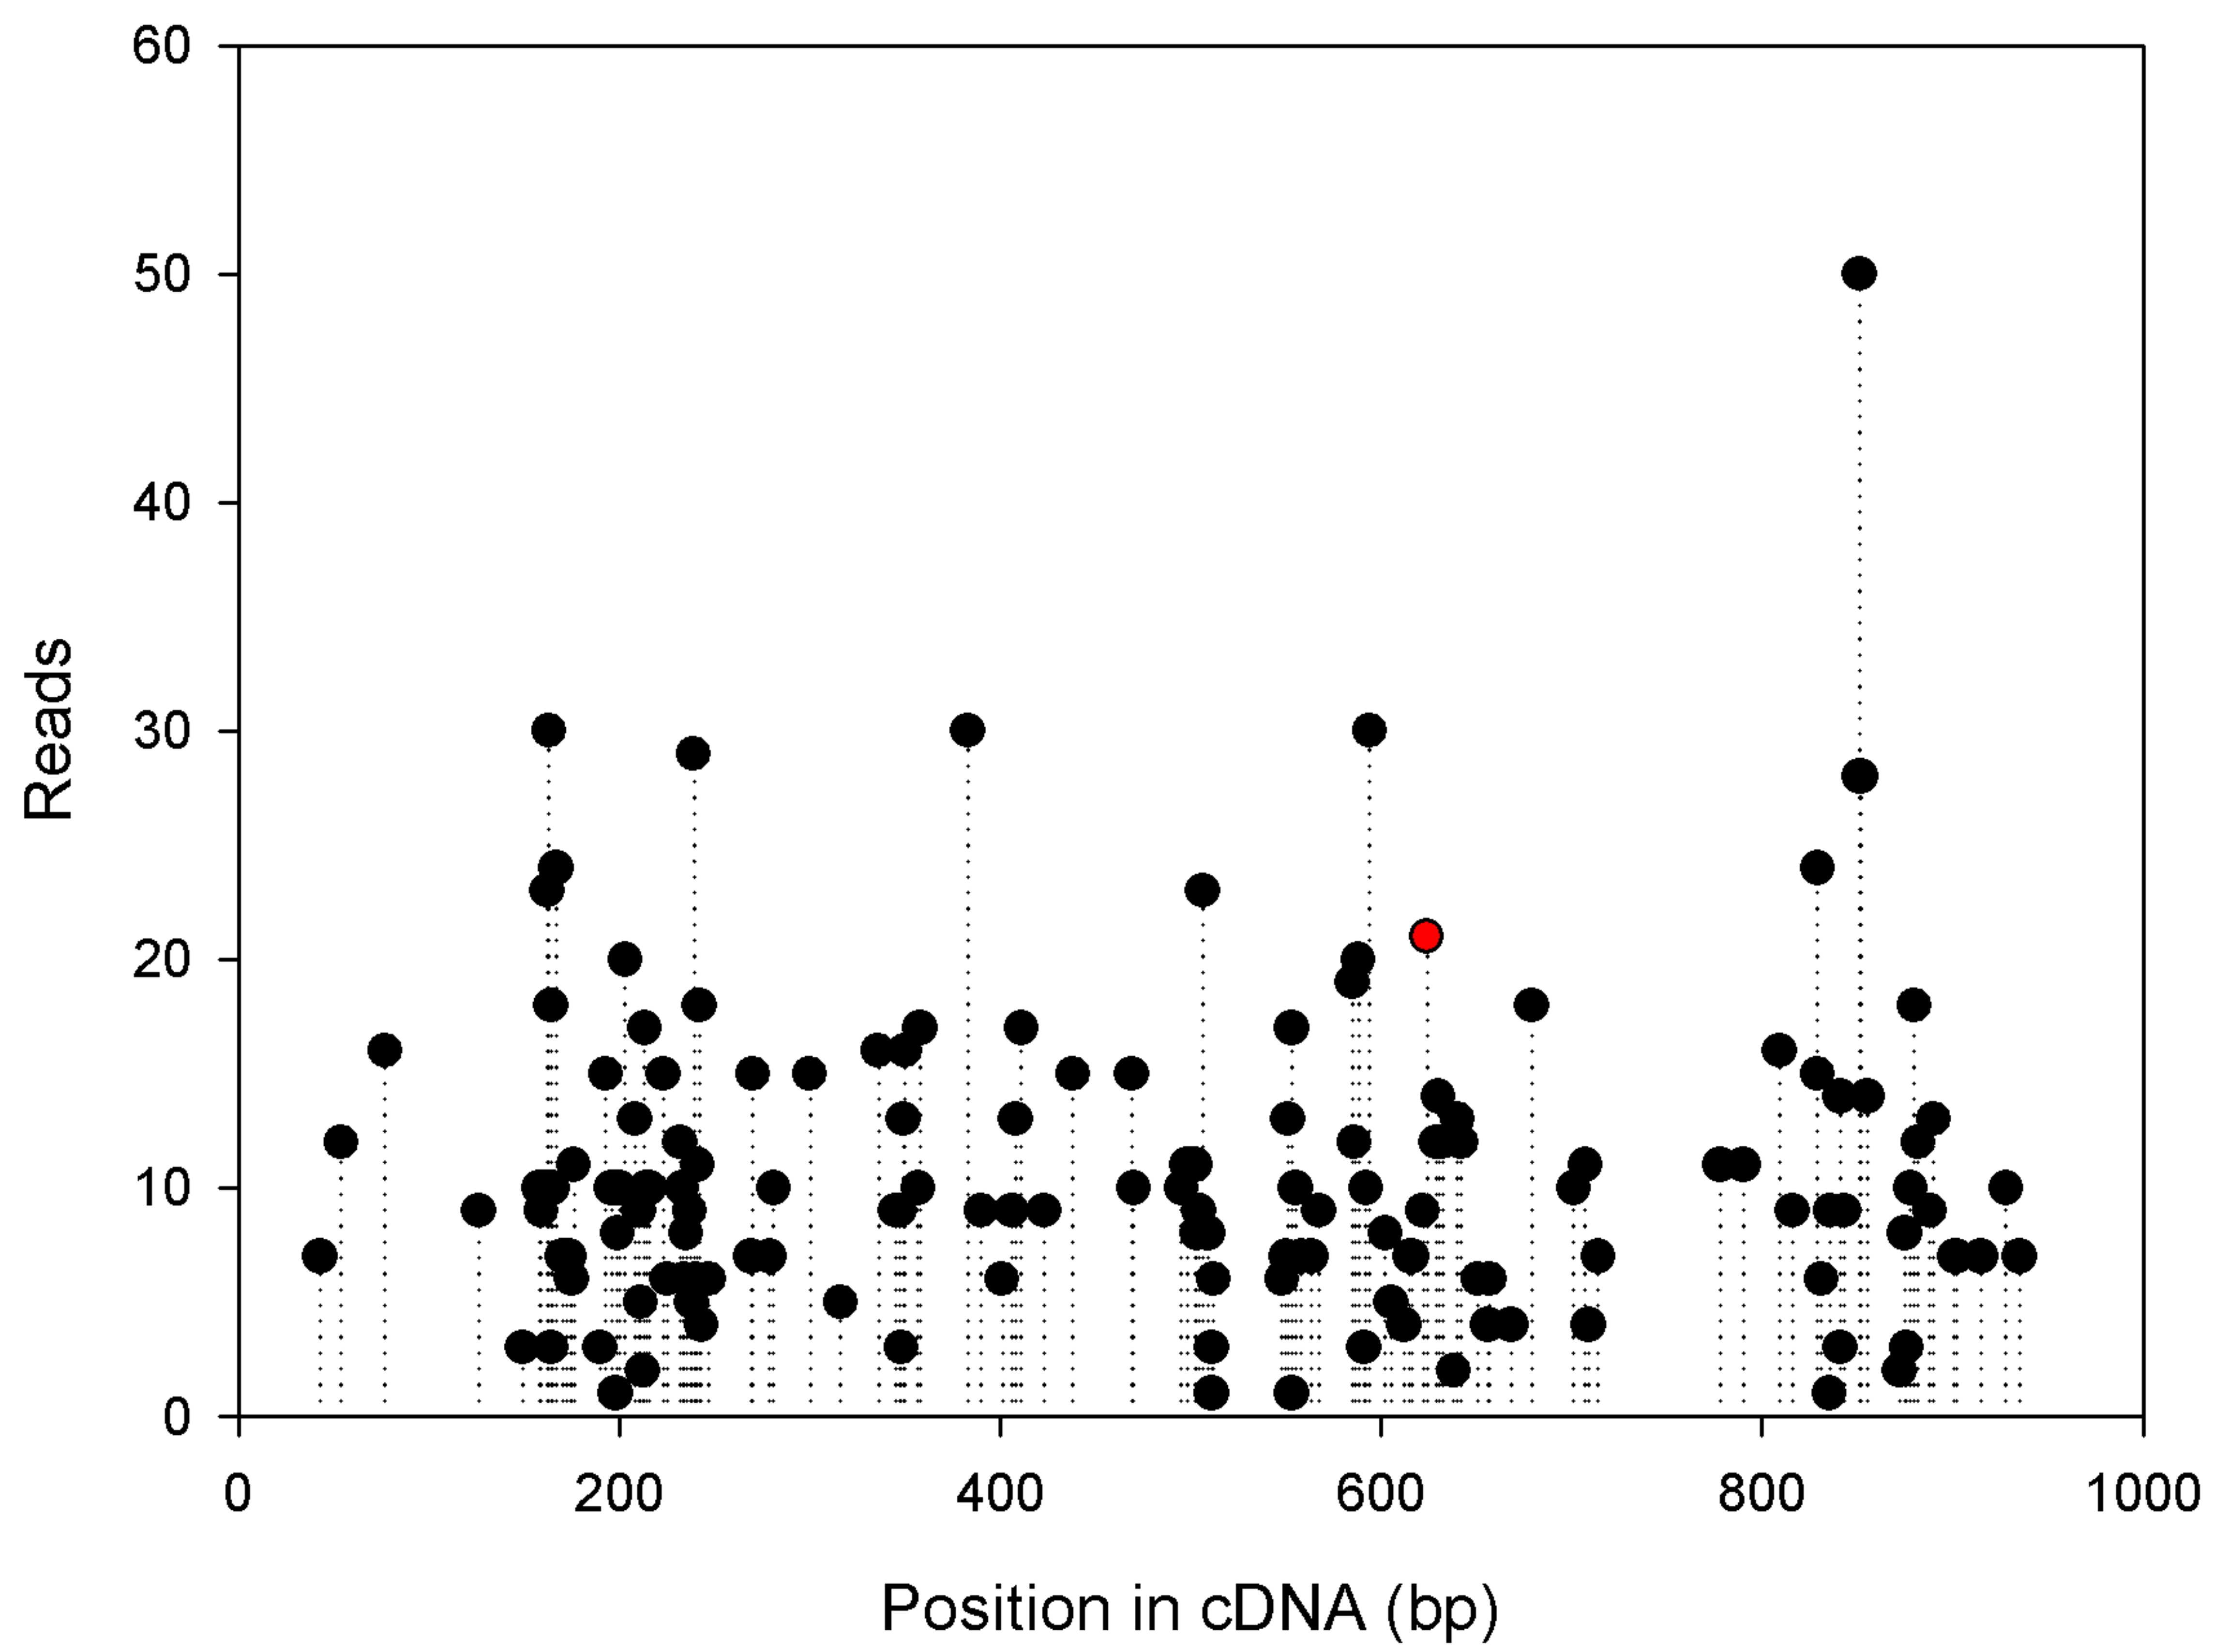

5' UUGGUGCAUUGCUUUUCUUUAUUGGG 3'

Cs9g08950.1

.....

3' AGUCCUGUUACGAAAAGAAAU----- 5'

Csi-miR2118.1-Orange1.1t02171.1-21

Csi-miR2118.1-Orange1.1t02171.1-30, target=Cs1g22190.1 gene=Cs1g22190  
 Category:2  
 Score:5  
 Cleavage site:1501

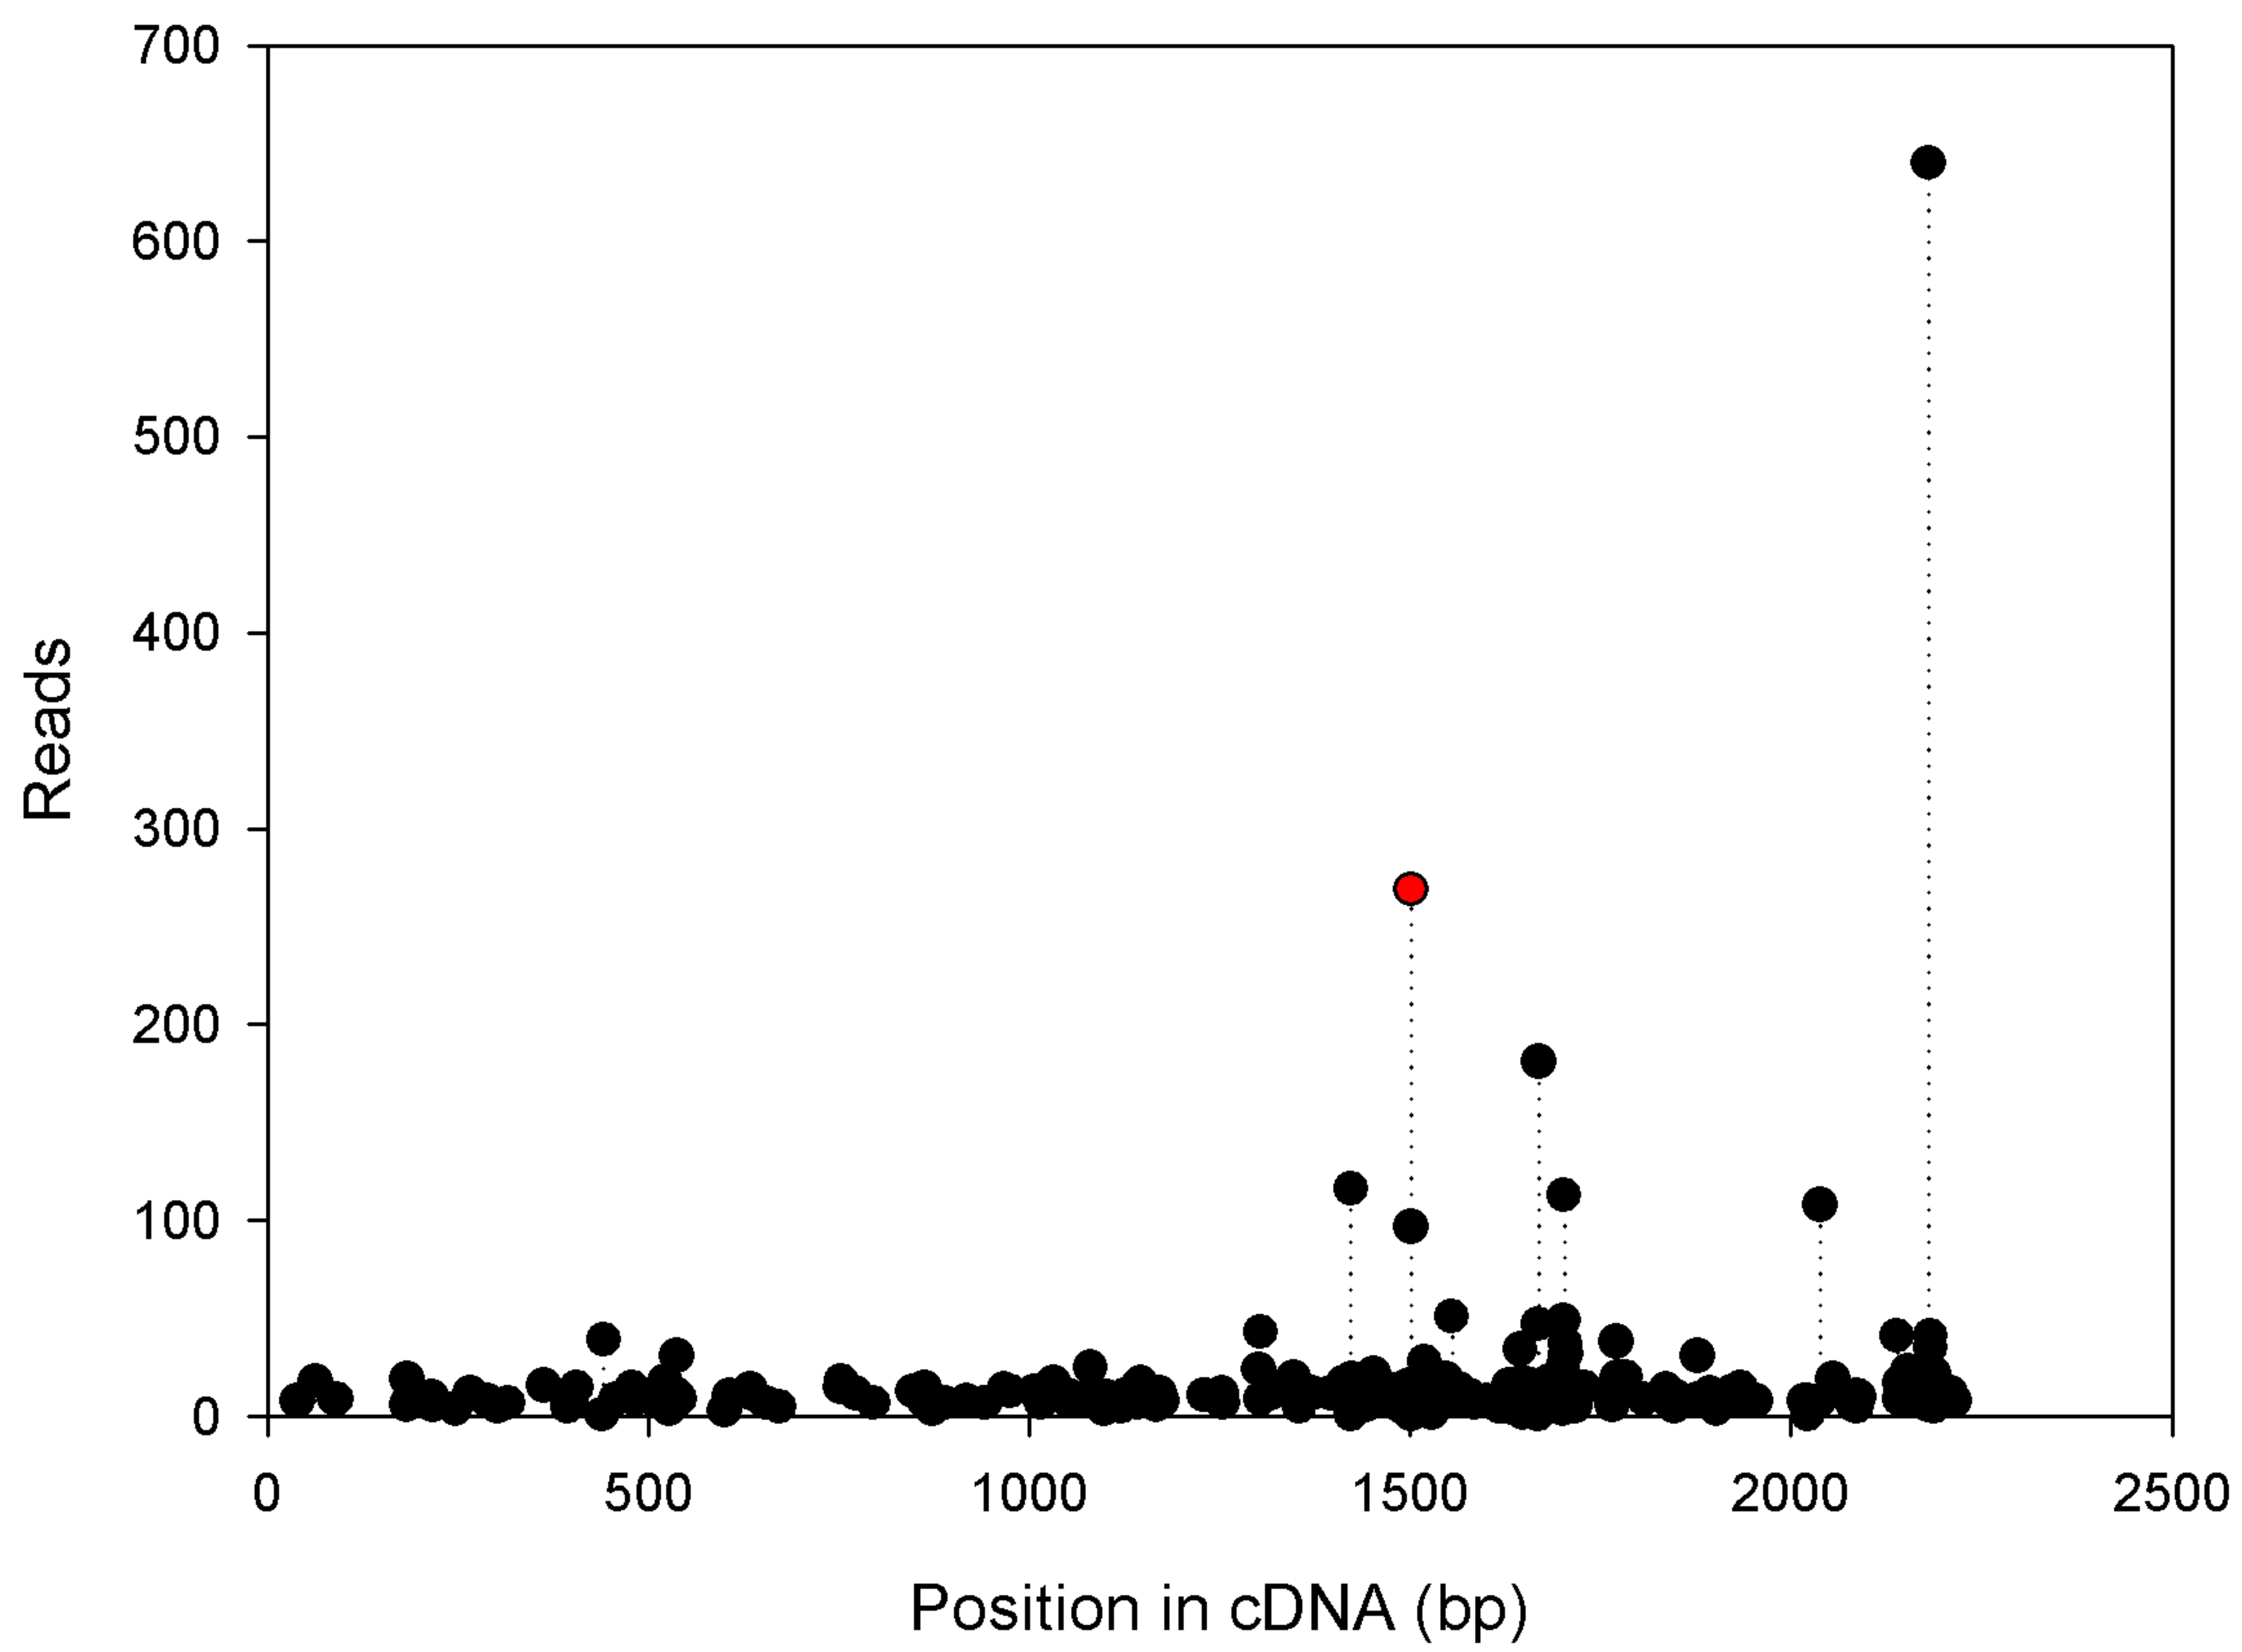

```
5' UUCGUUGUUGGCCUCUUGCUCAGAUG 3'
   : : : : : : : : : : : : : :
3' ----AACGGACCGAGAAAGAGUCUA- 5'
```

```
Cs1g22190.1
Csi-miR2118.1-Orange1.1t02171.1-30
```



Csi-miR2118.1-Orange1.1t02175.1-85, target=Cs3g06440.1 gene=Cs3g06440  
 Category:3  
 Score:5  
 Cleavage site:1273

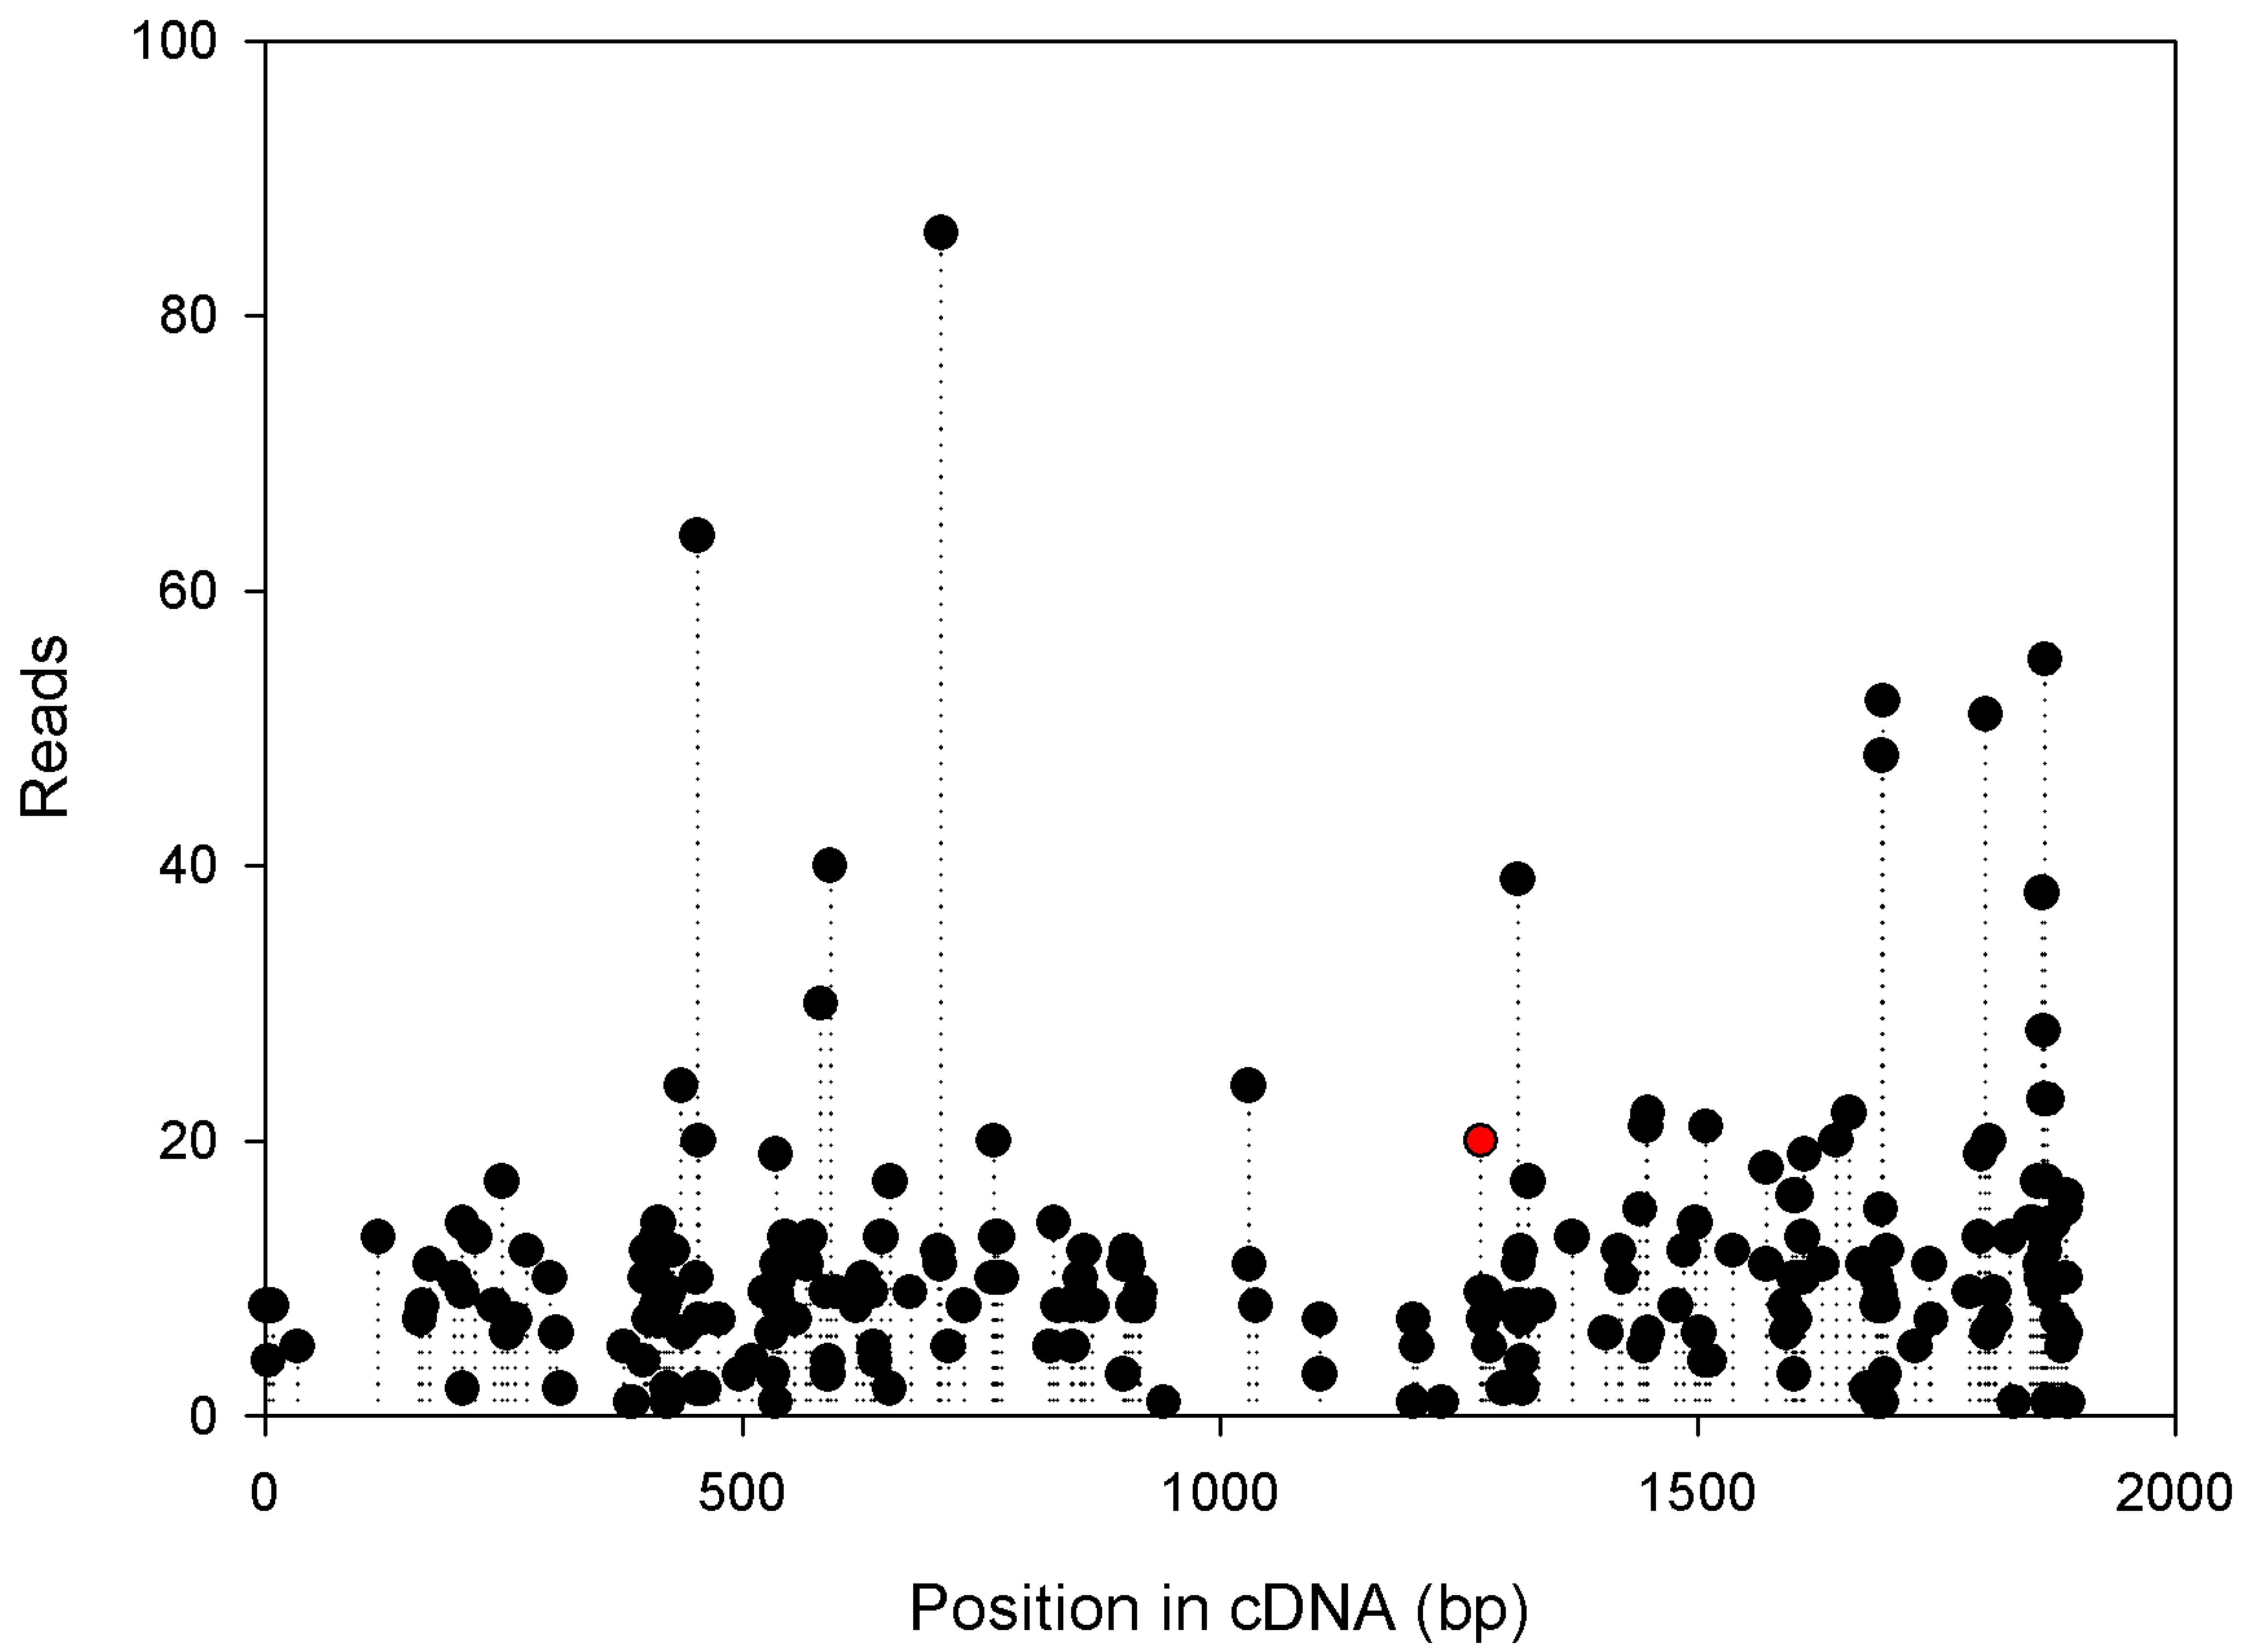

5' ACCCUUAUAUAG-CAAUGUUAUCGGGG 3'  
 :: :: : :::::::::::::: ::  
 3' -----AUUUAACGGUACAAUAGGCC- 5'

Cs3g06440.1

Csi-miR2118.1-Orange1.1t02175.1-85

Csi-miR2118.1-Orange1.1t02175.1-85, target=Cs6g16200.1 gene=Cs6g16200  
 Category:3  
 Score:5  
 Cleavage site:811

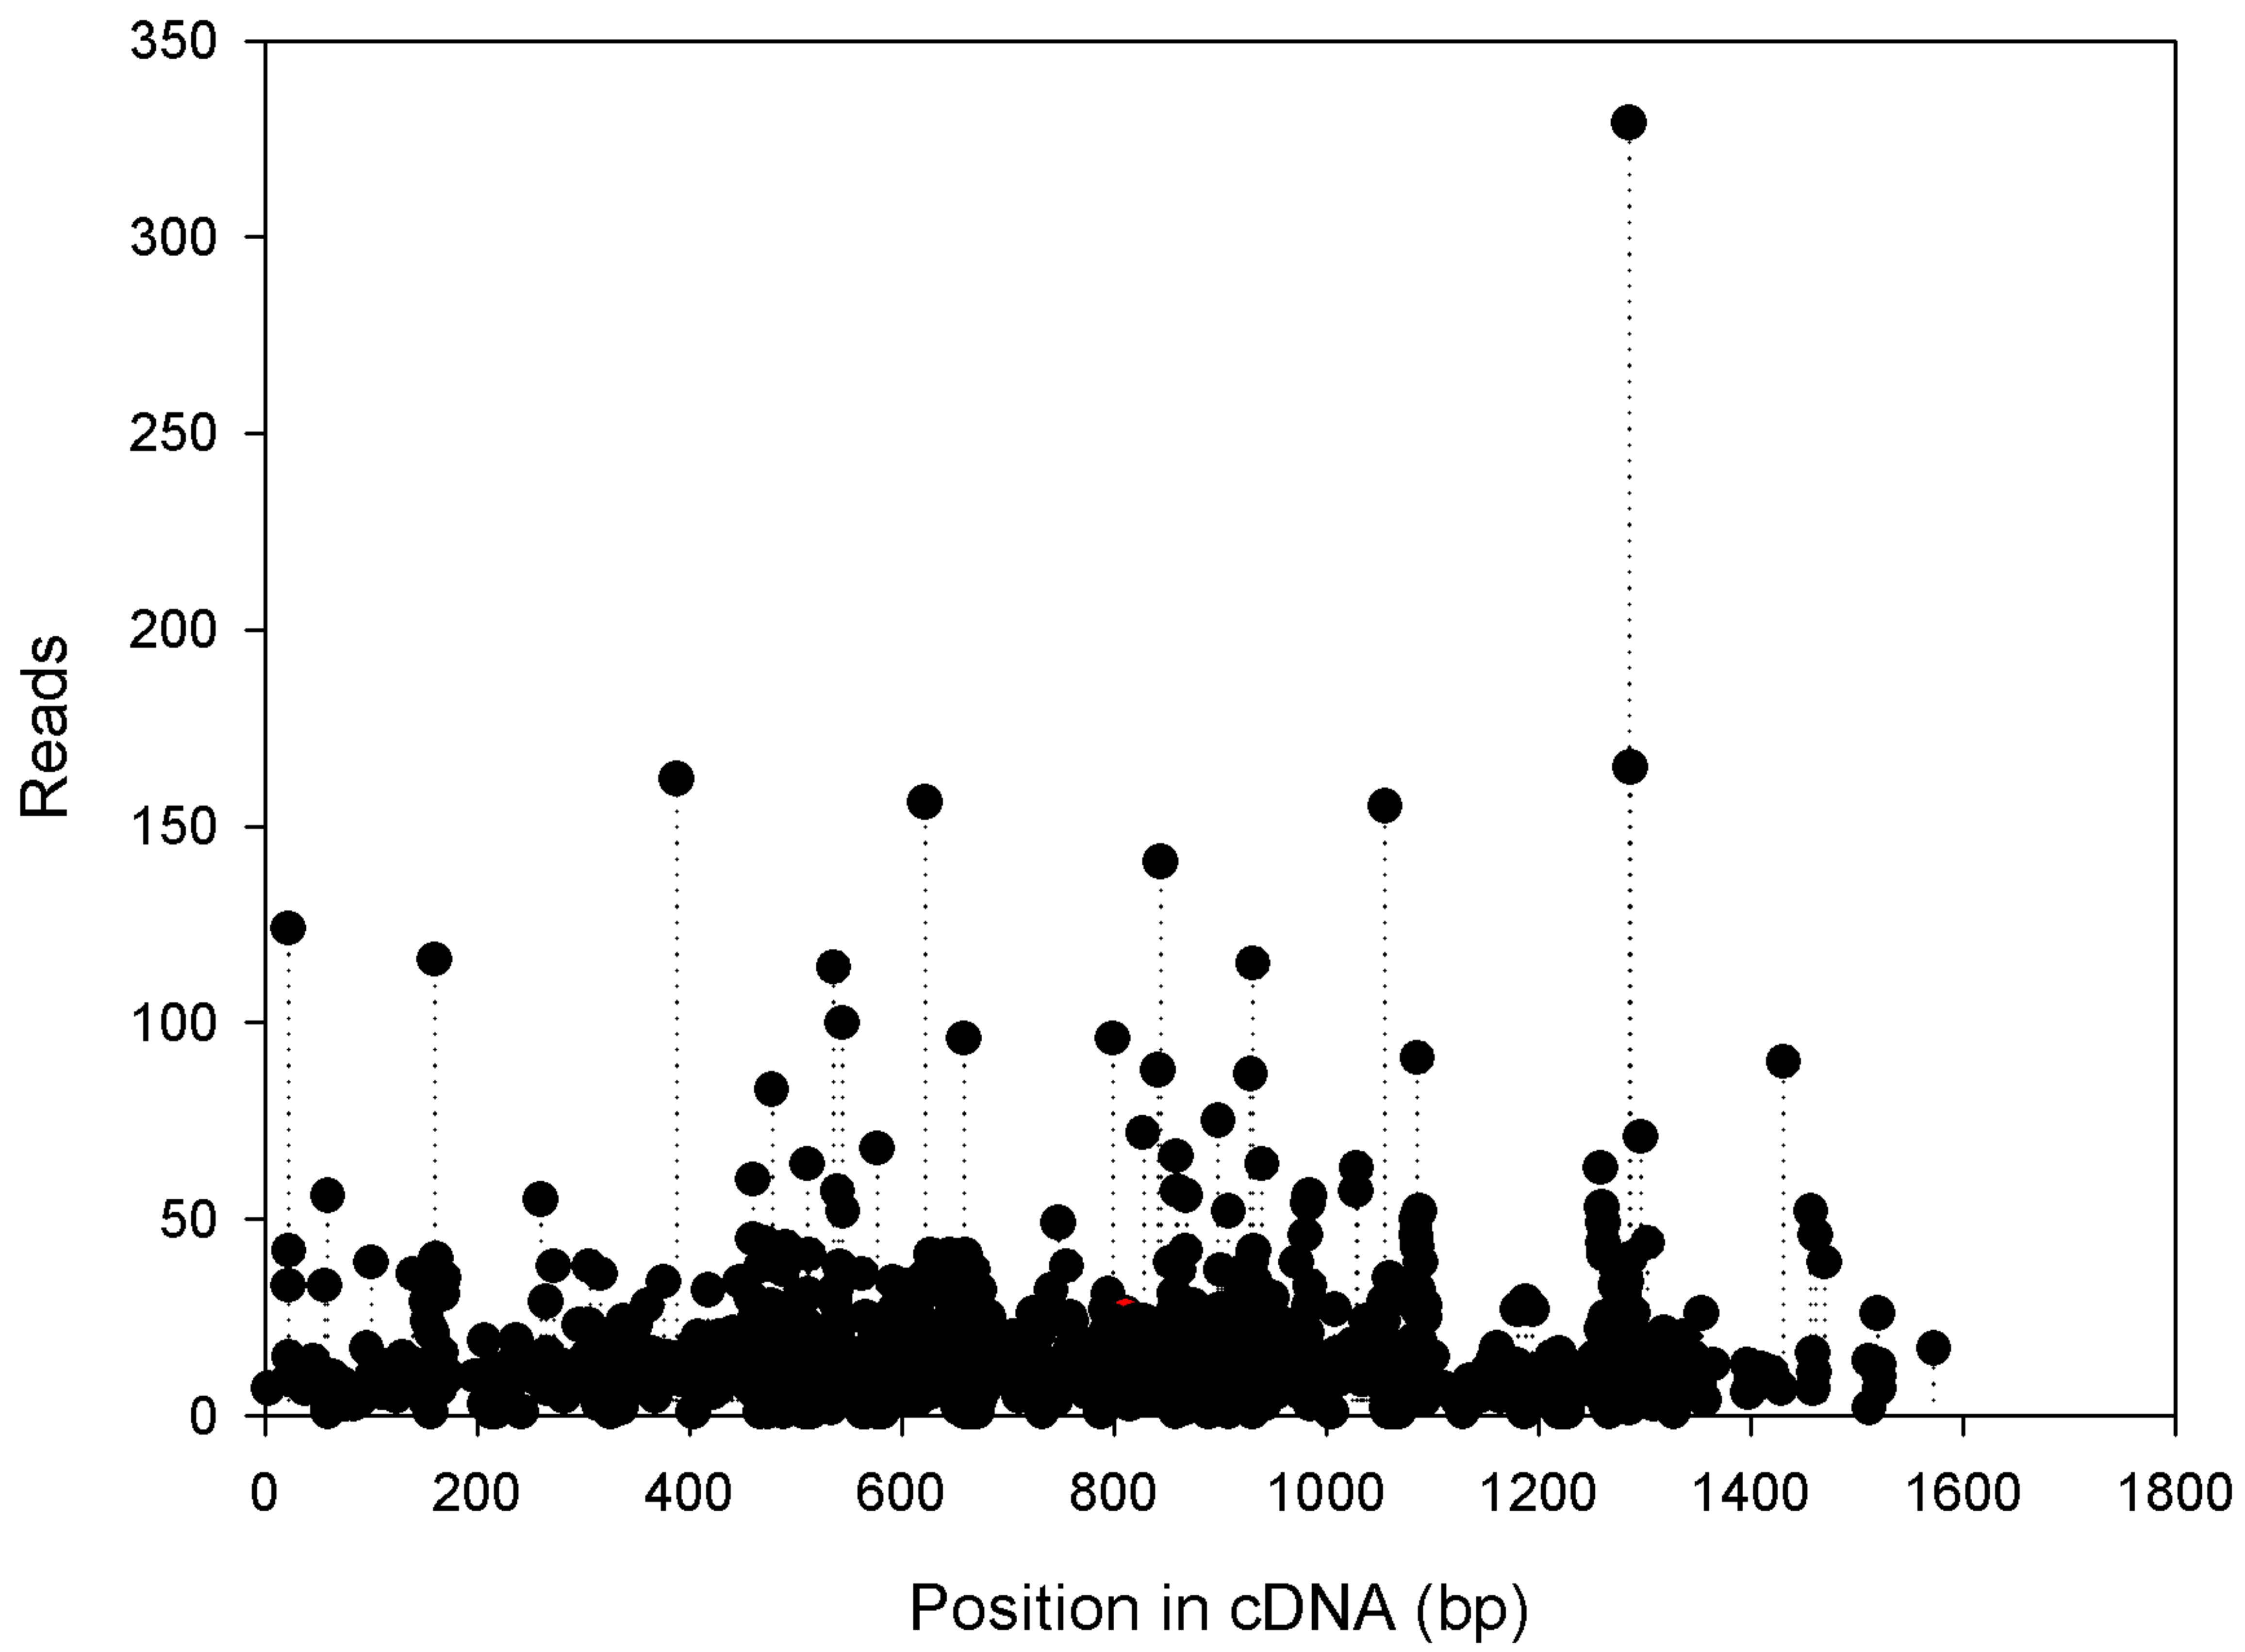

5' CAACCCUGAGUU-CCAAUGUUAUCCCA 3'  
 :.:.:.: :.:.:.:.:.:.:.:.:.  
 3' -----AUUUAACGGUACAAUAGGCC 5'

Cs6g16200.1

Csi-miR2118.1-Orange1.1t02175.1-85

Csi-miR3954a-Cs1g09600.1-7, target=Cs2g11250.1 gene=Cs2g11250  
 Category:3  
 Score:4.5  
 Cleavage site:2603

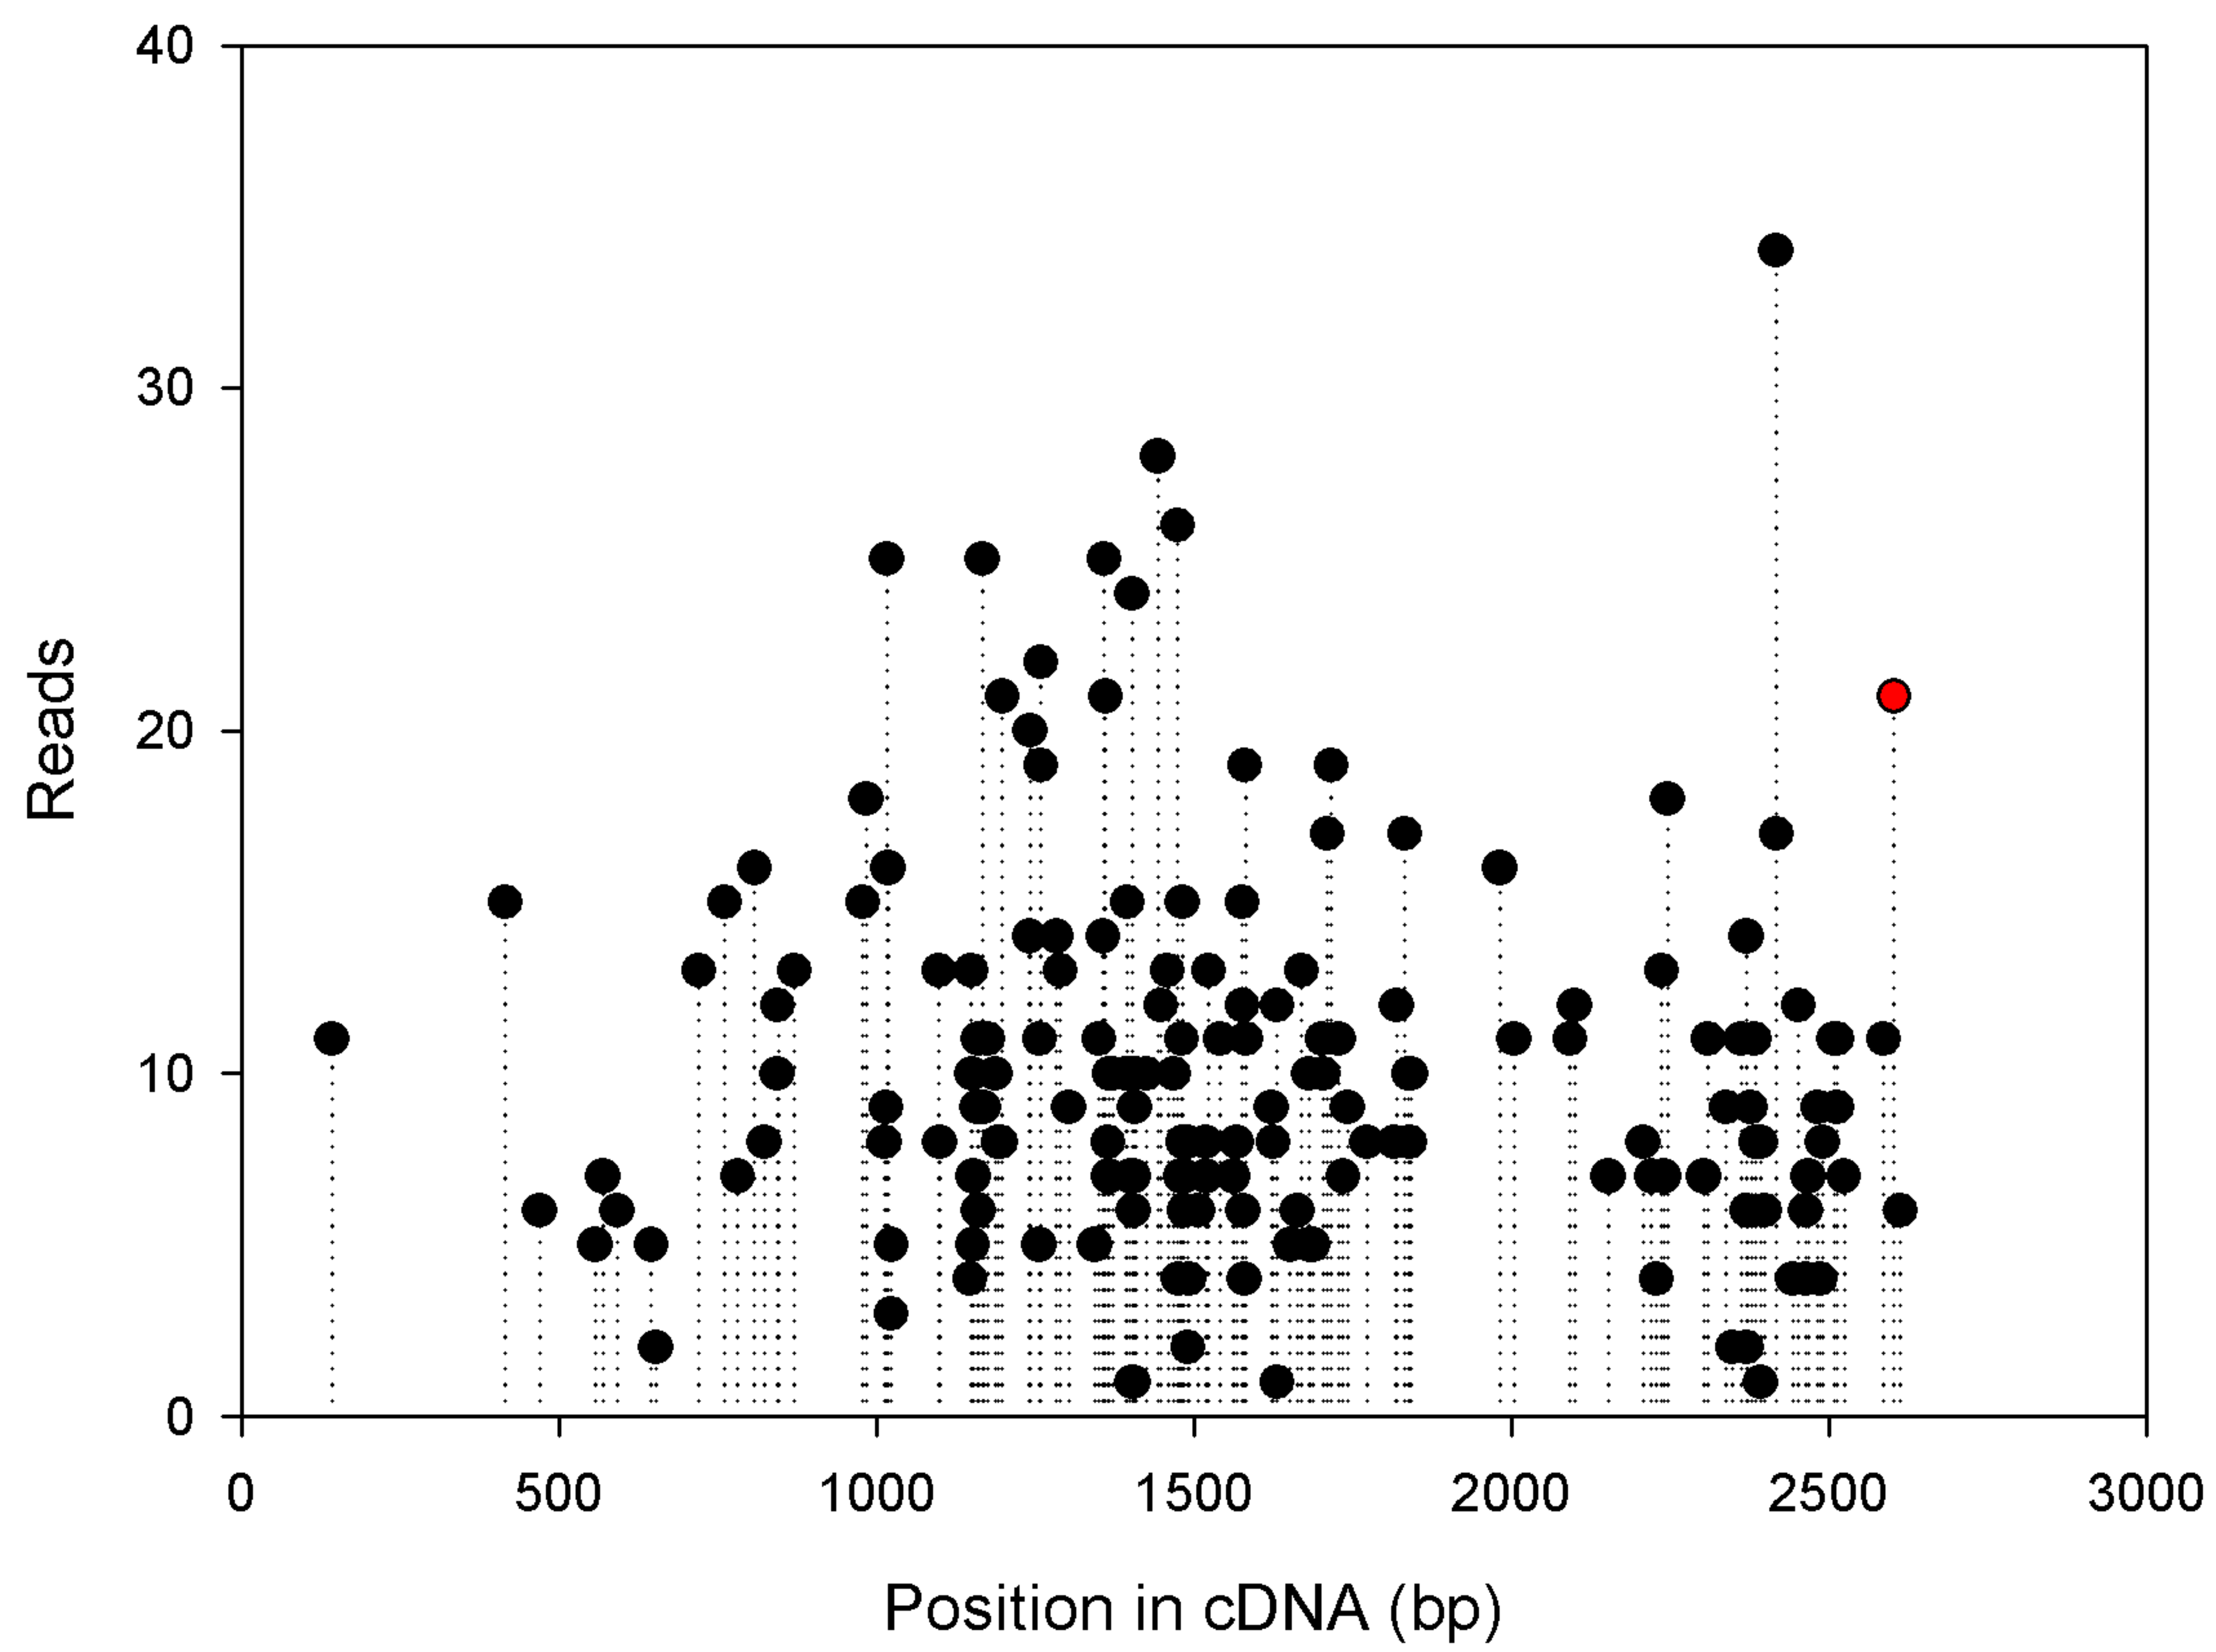

5' GUAUUUA-GUUCUGCUCUUCAGAAUAA 3'  
 . . . : : : : : . . . : : : : : . . . : : : : :  
 3' ---CGAUCCAAGAUGGGAAGUCUU--- 5'

Cs2g11250.1

Csi-miR3954a-Cs1g09600.1-7

Csi-miR3954a-Cs1g09600.1-9, target=Cs2g04220.1 gene=Cs2g04220  
 Category:3  
 Score:4.5  
 Cleavage site:1133

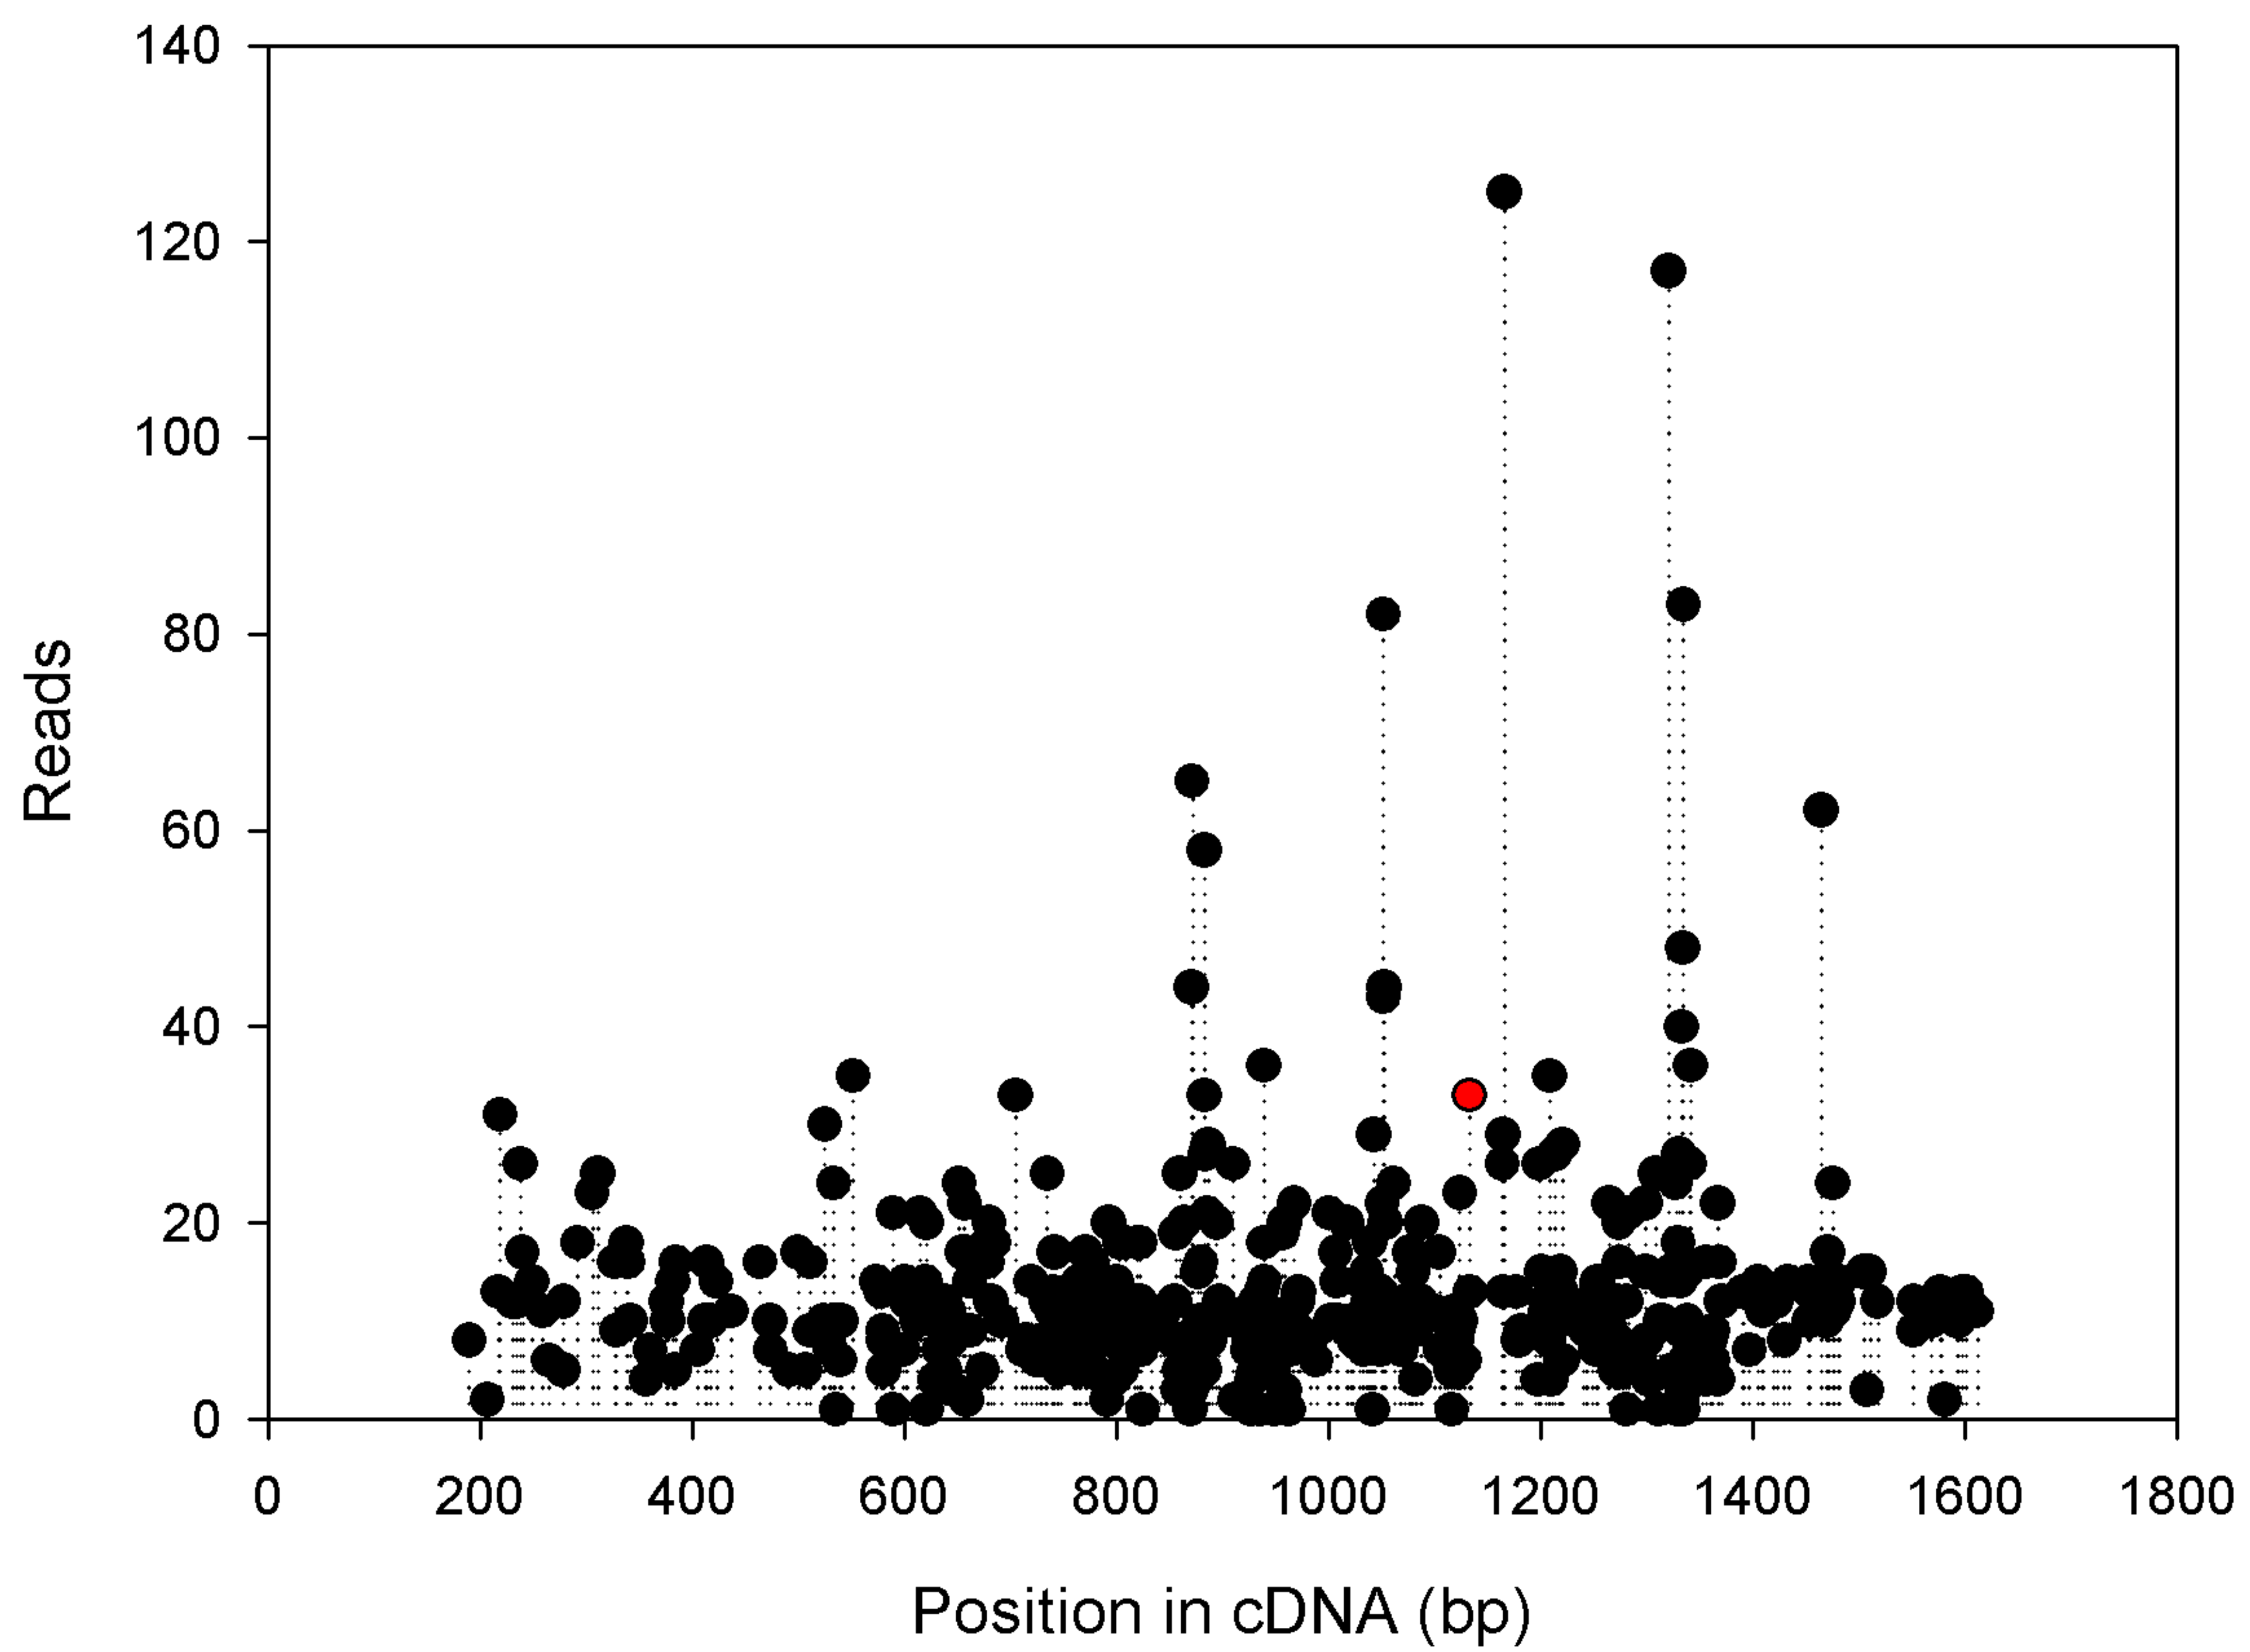

5' CACGCUAUGGUUU-UAGAGUGACAAAU 3'  
 .....  
 3' -----UACUAAAGAUCUUAGUGUUUA 5'

Cs2g04220.1

Csi-miR3954a-Cs1g09600.1-9

Csi-miR3954a-Cs1g09600.1-9, target=Cs3g07100.1 gene=Cs3g07100  
 Category:3  
 Score:4.5  
 Cleavage site:963

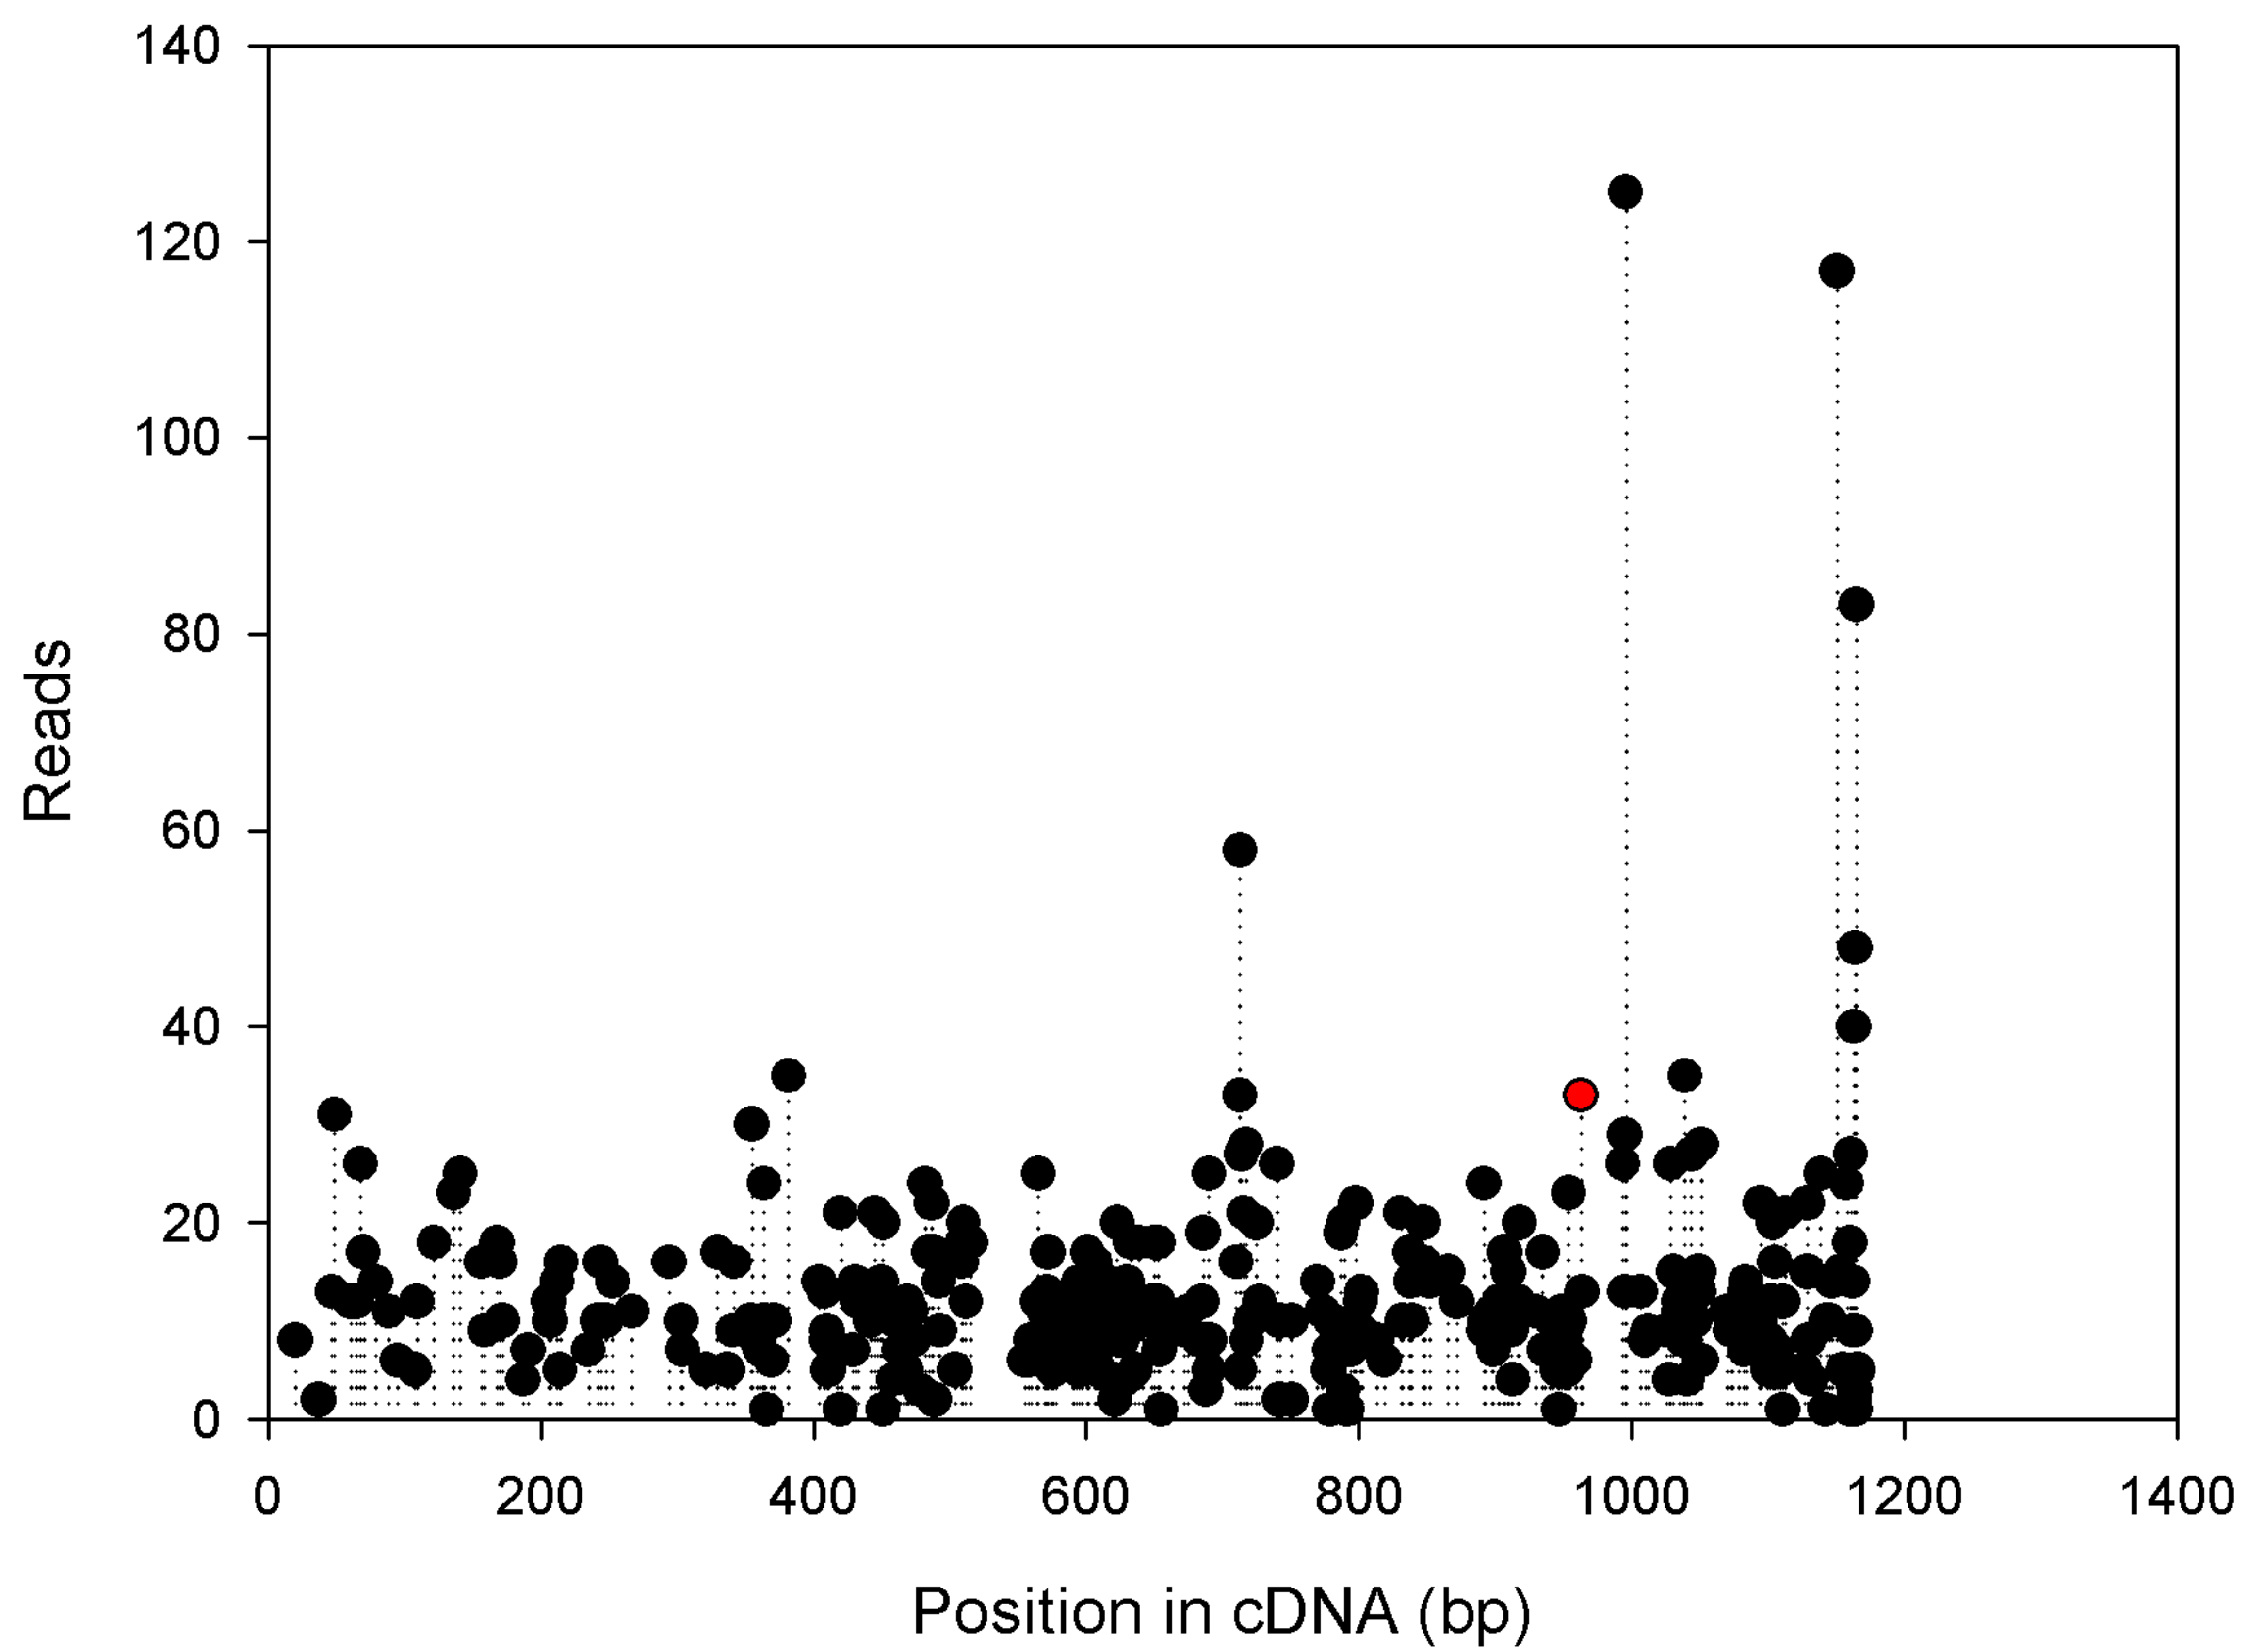

5' CACGCUAUGGUUU-UAGAGUGACAAAU 3'  
 :::::::::: :::::::::: ::::::::::  
 3' -----UACUAAAGAUCUUAGUGUUUA 5'

Cs3g07100.1

Csi-miR3954a-Cs1g09600.1-9

Csi-miR3954a-Cs1g09635.1-7, target=Cs4g11930.1 gene=Cs4g11930  
 Category:3  
 Score:3.5  
 Cleavage site:504

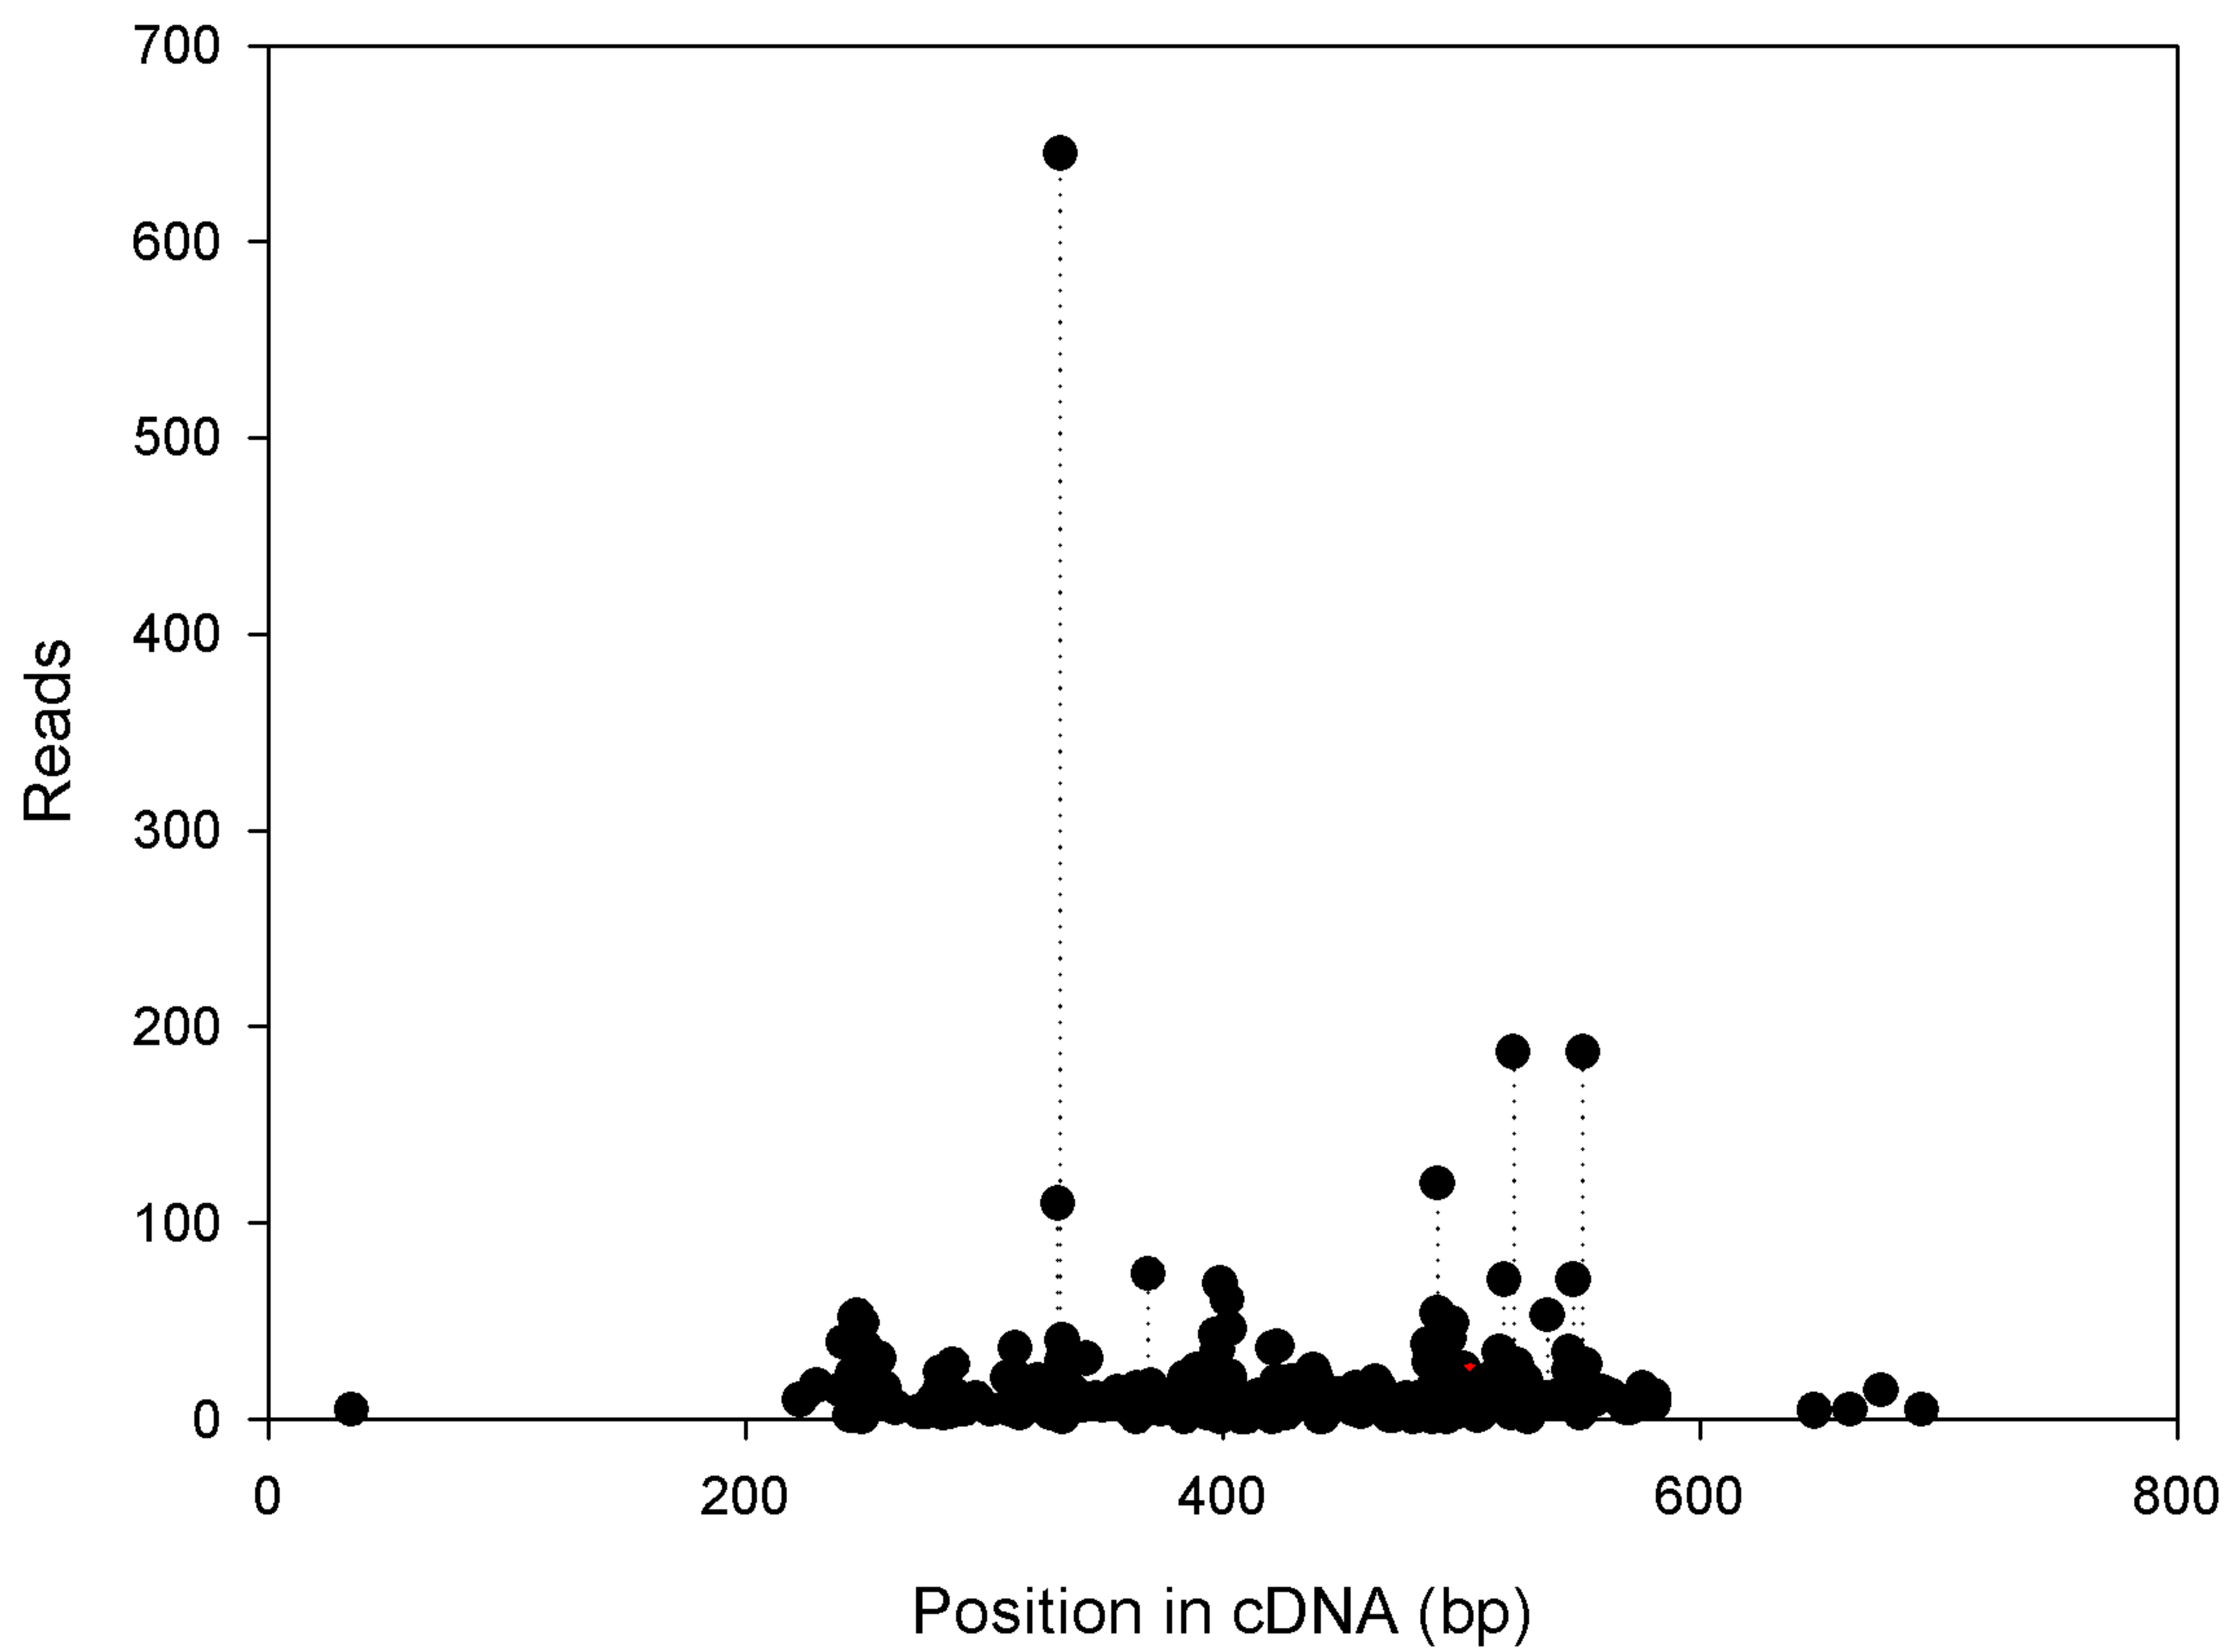

5' UCUCCUGAGGUUUGACCUUUGAGAAU 3'

Cs4g11930.1

.....

3' ----GACUCCAGGCUGGAAAGUCUU- 5'

Csi-miR3954a-Cs1g09635.1-7

Csi-miR3954a-Cs1g09635.1-9, target=Cs2g11990.1 gene=Cs2g11990

Category:1

Score:4.5

Cleavage site:478

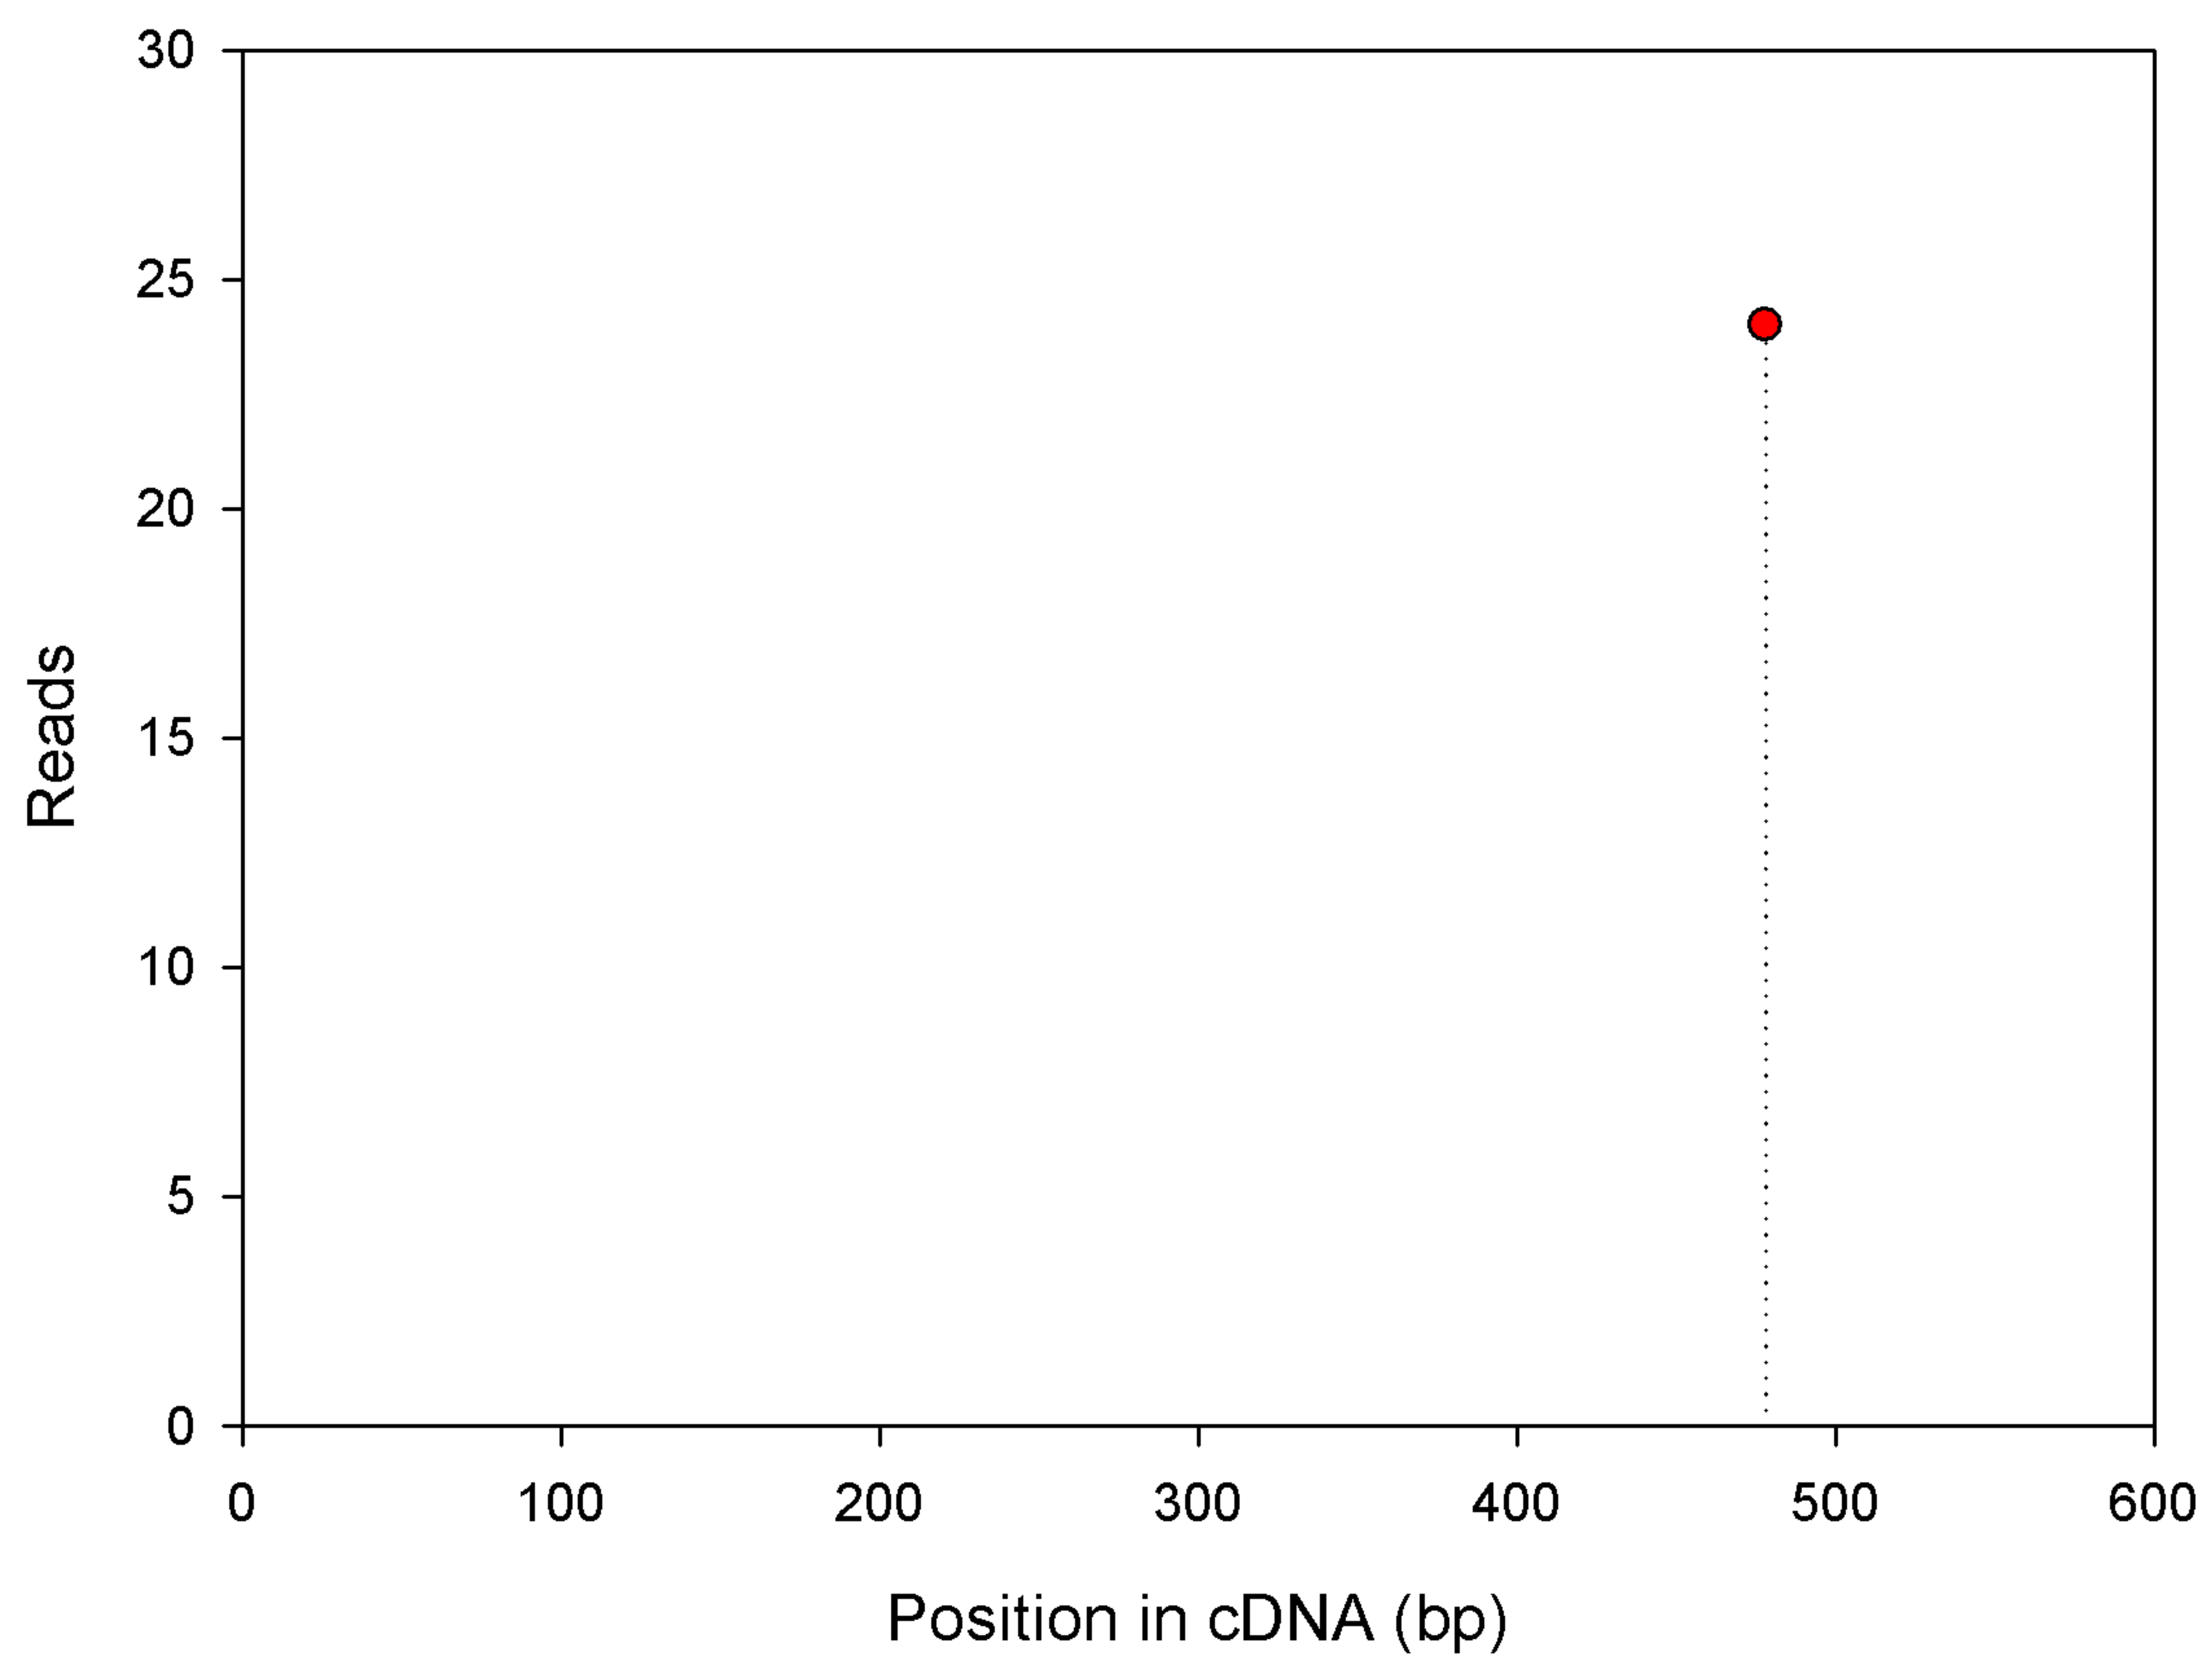

```
5' AGUACUACUUCAAUCAACAAAGGCUCA 3'
   :   :   :   .   :   :   :   :   :
3' --AAGAU-AGUUUAGUGUUUCCGU-- 5'
```

Cs2g11990.1

Csi-miR3954a-Cs1g09635.1-9

Csi-miR3954a-Cs1g09635.1-9, target=Cs5g11880.1 gene=Cs5g11880

Category:3

Score:5

Cleavage site:407

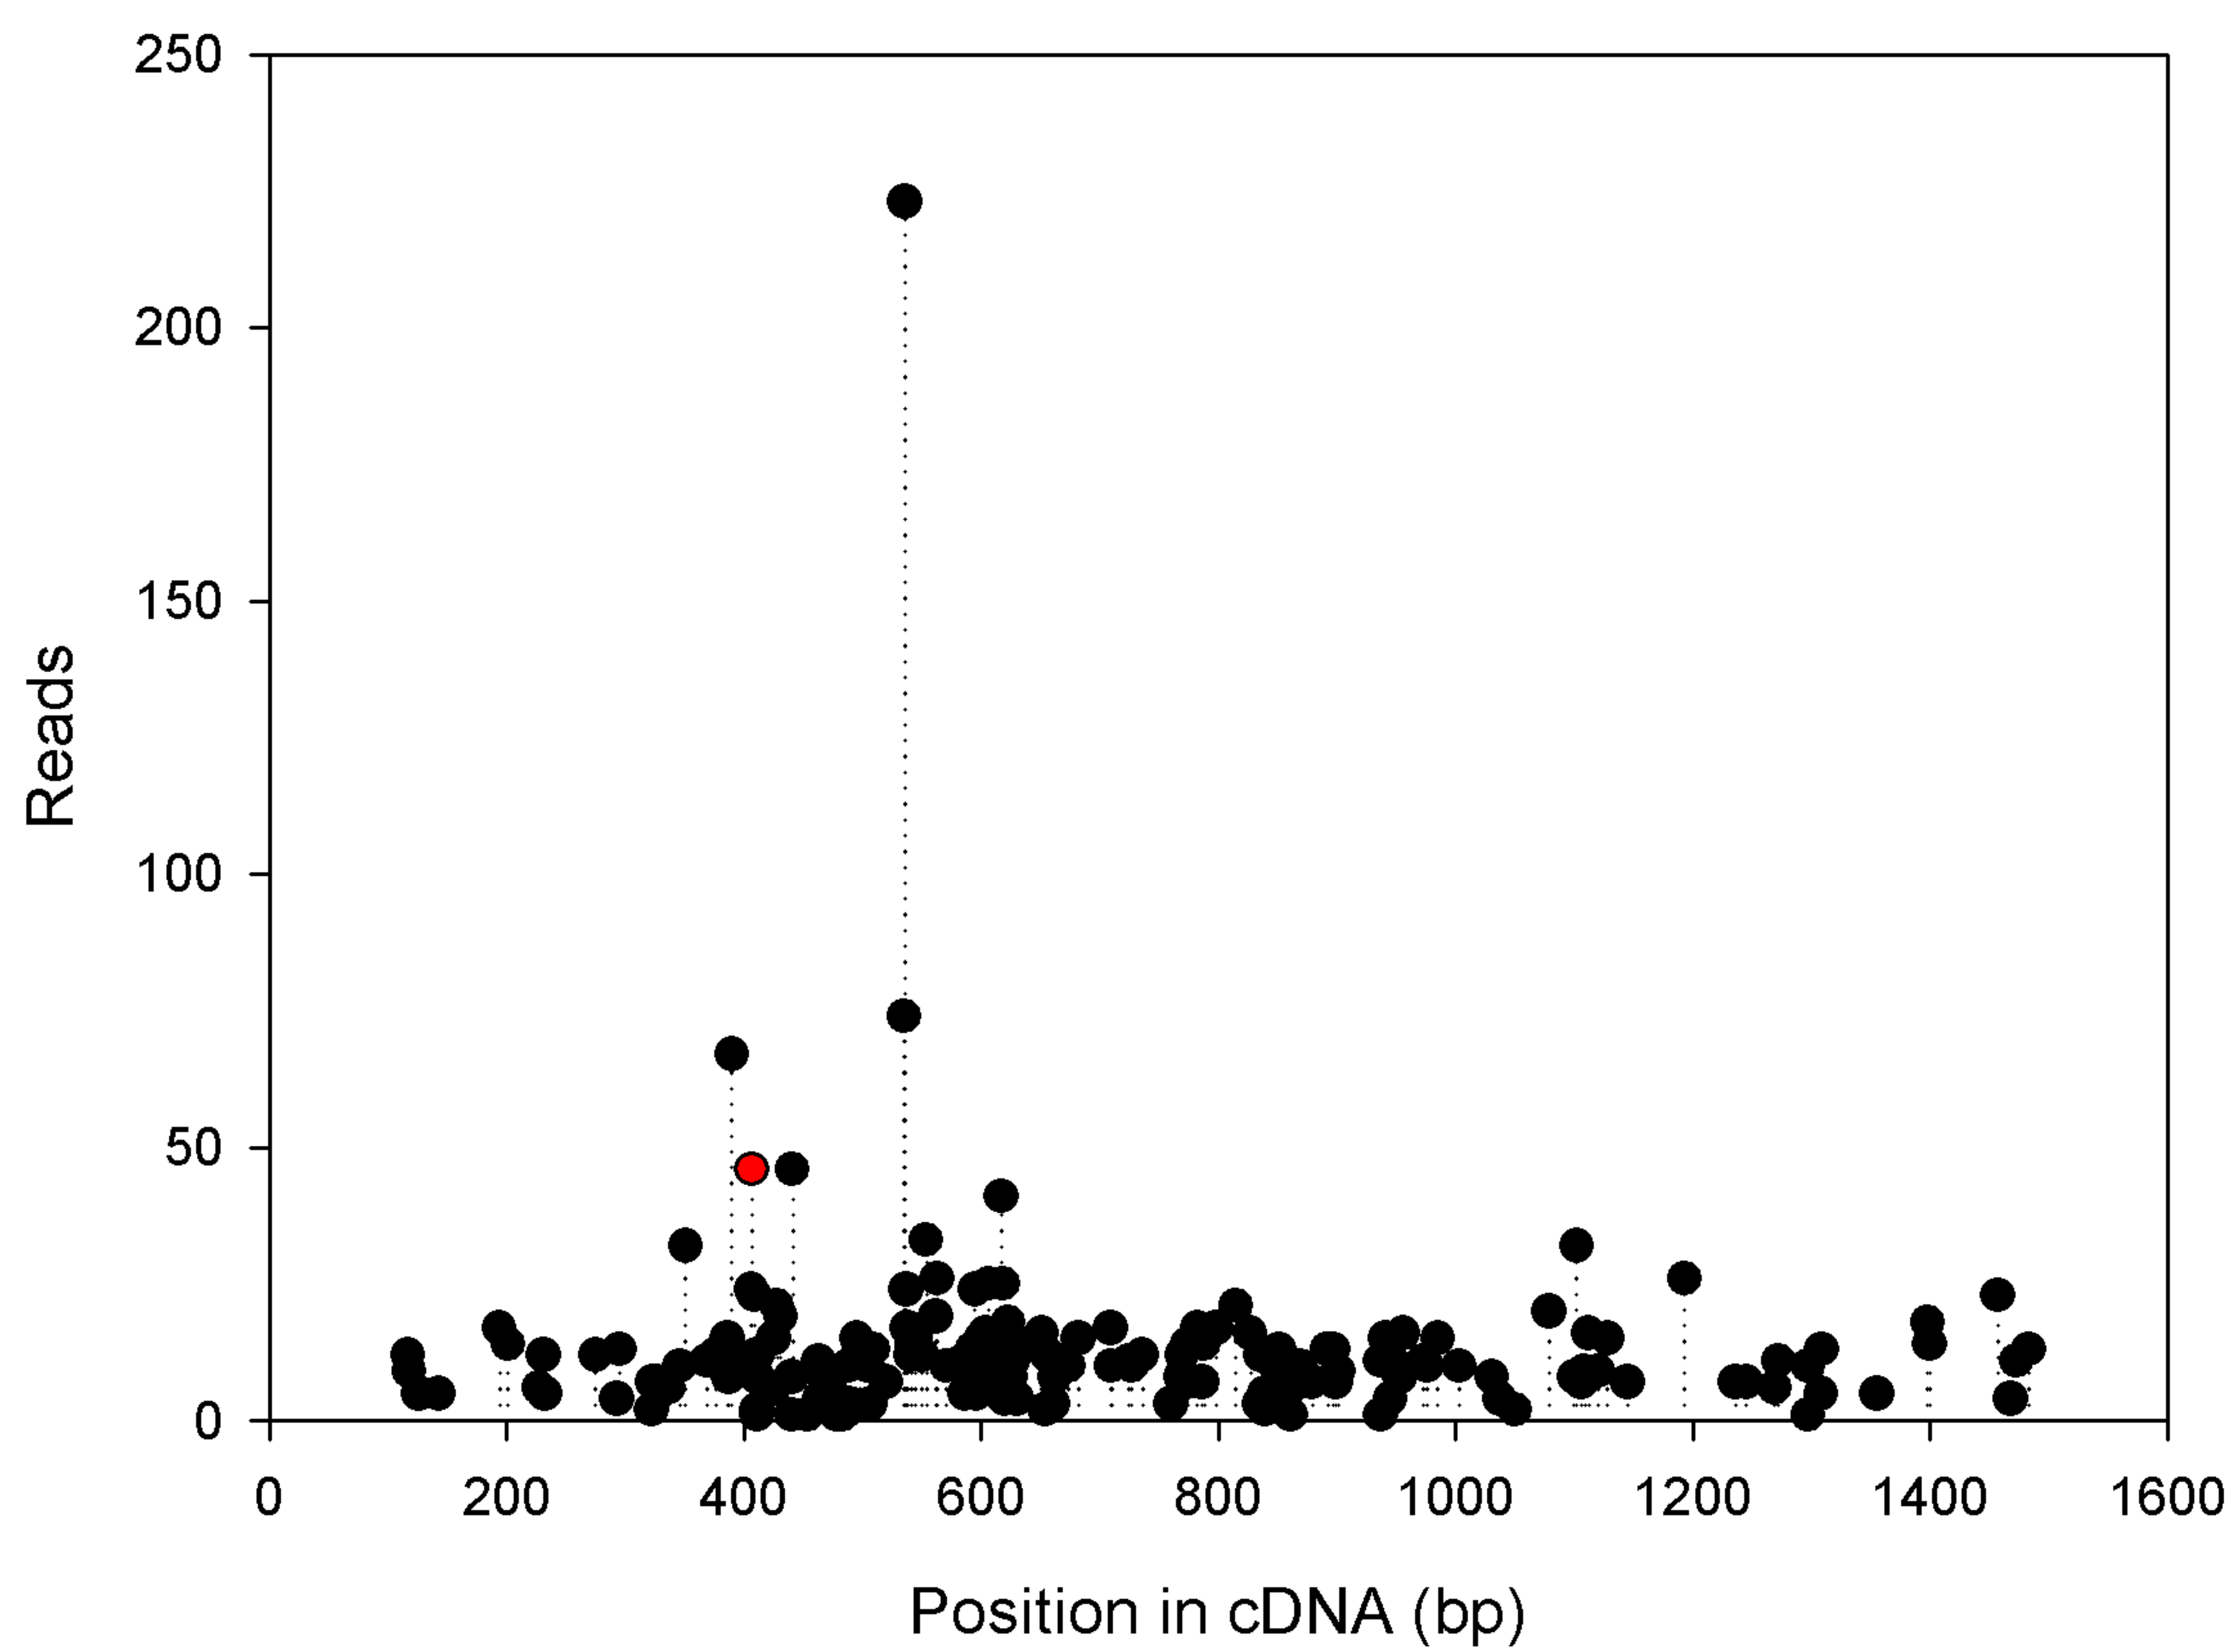

5' AAUAUUC-AGAAAUUACAAAGGCUAU 3'

Cs5g11880.1

... : ..... : .....

3' ----AAGAUAGUUUAGUGUUUCCGU-- 5'

Csi-miR3954a-Cs1g09635.1-9



Csi-miR3954a-Cs5g04670.1-10, target=Cs4g17040.1 gene=Cs4g17040

Category:2

Score:5

Cleavage site:1227

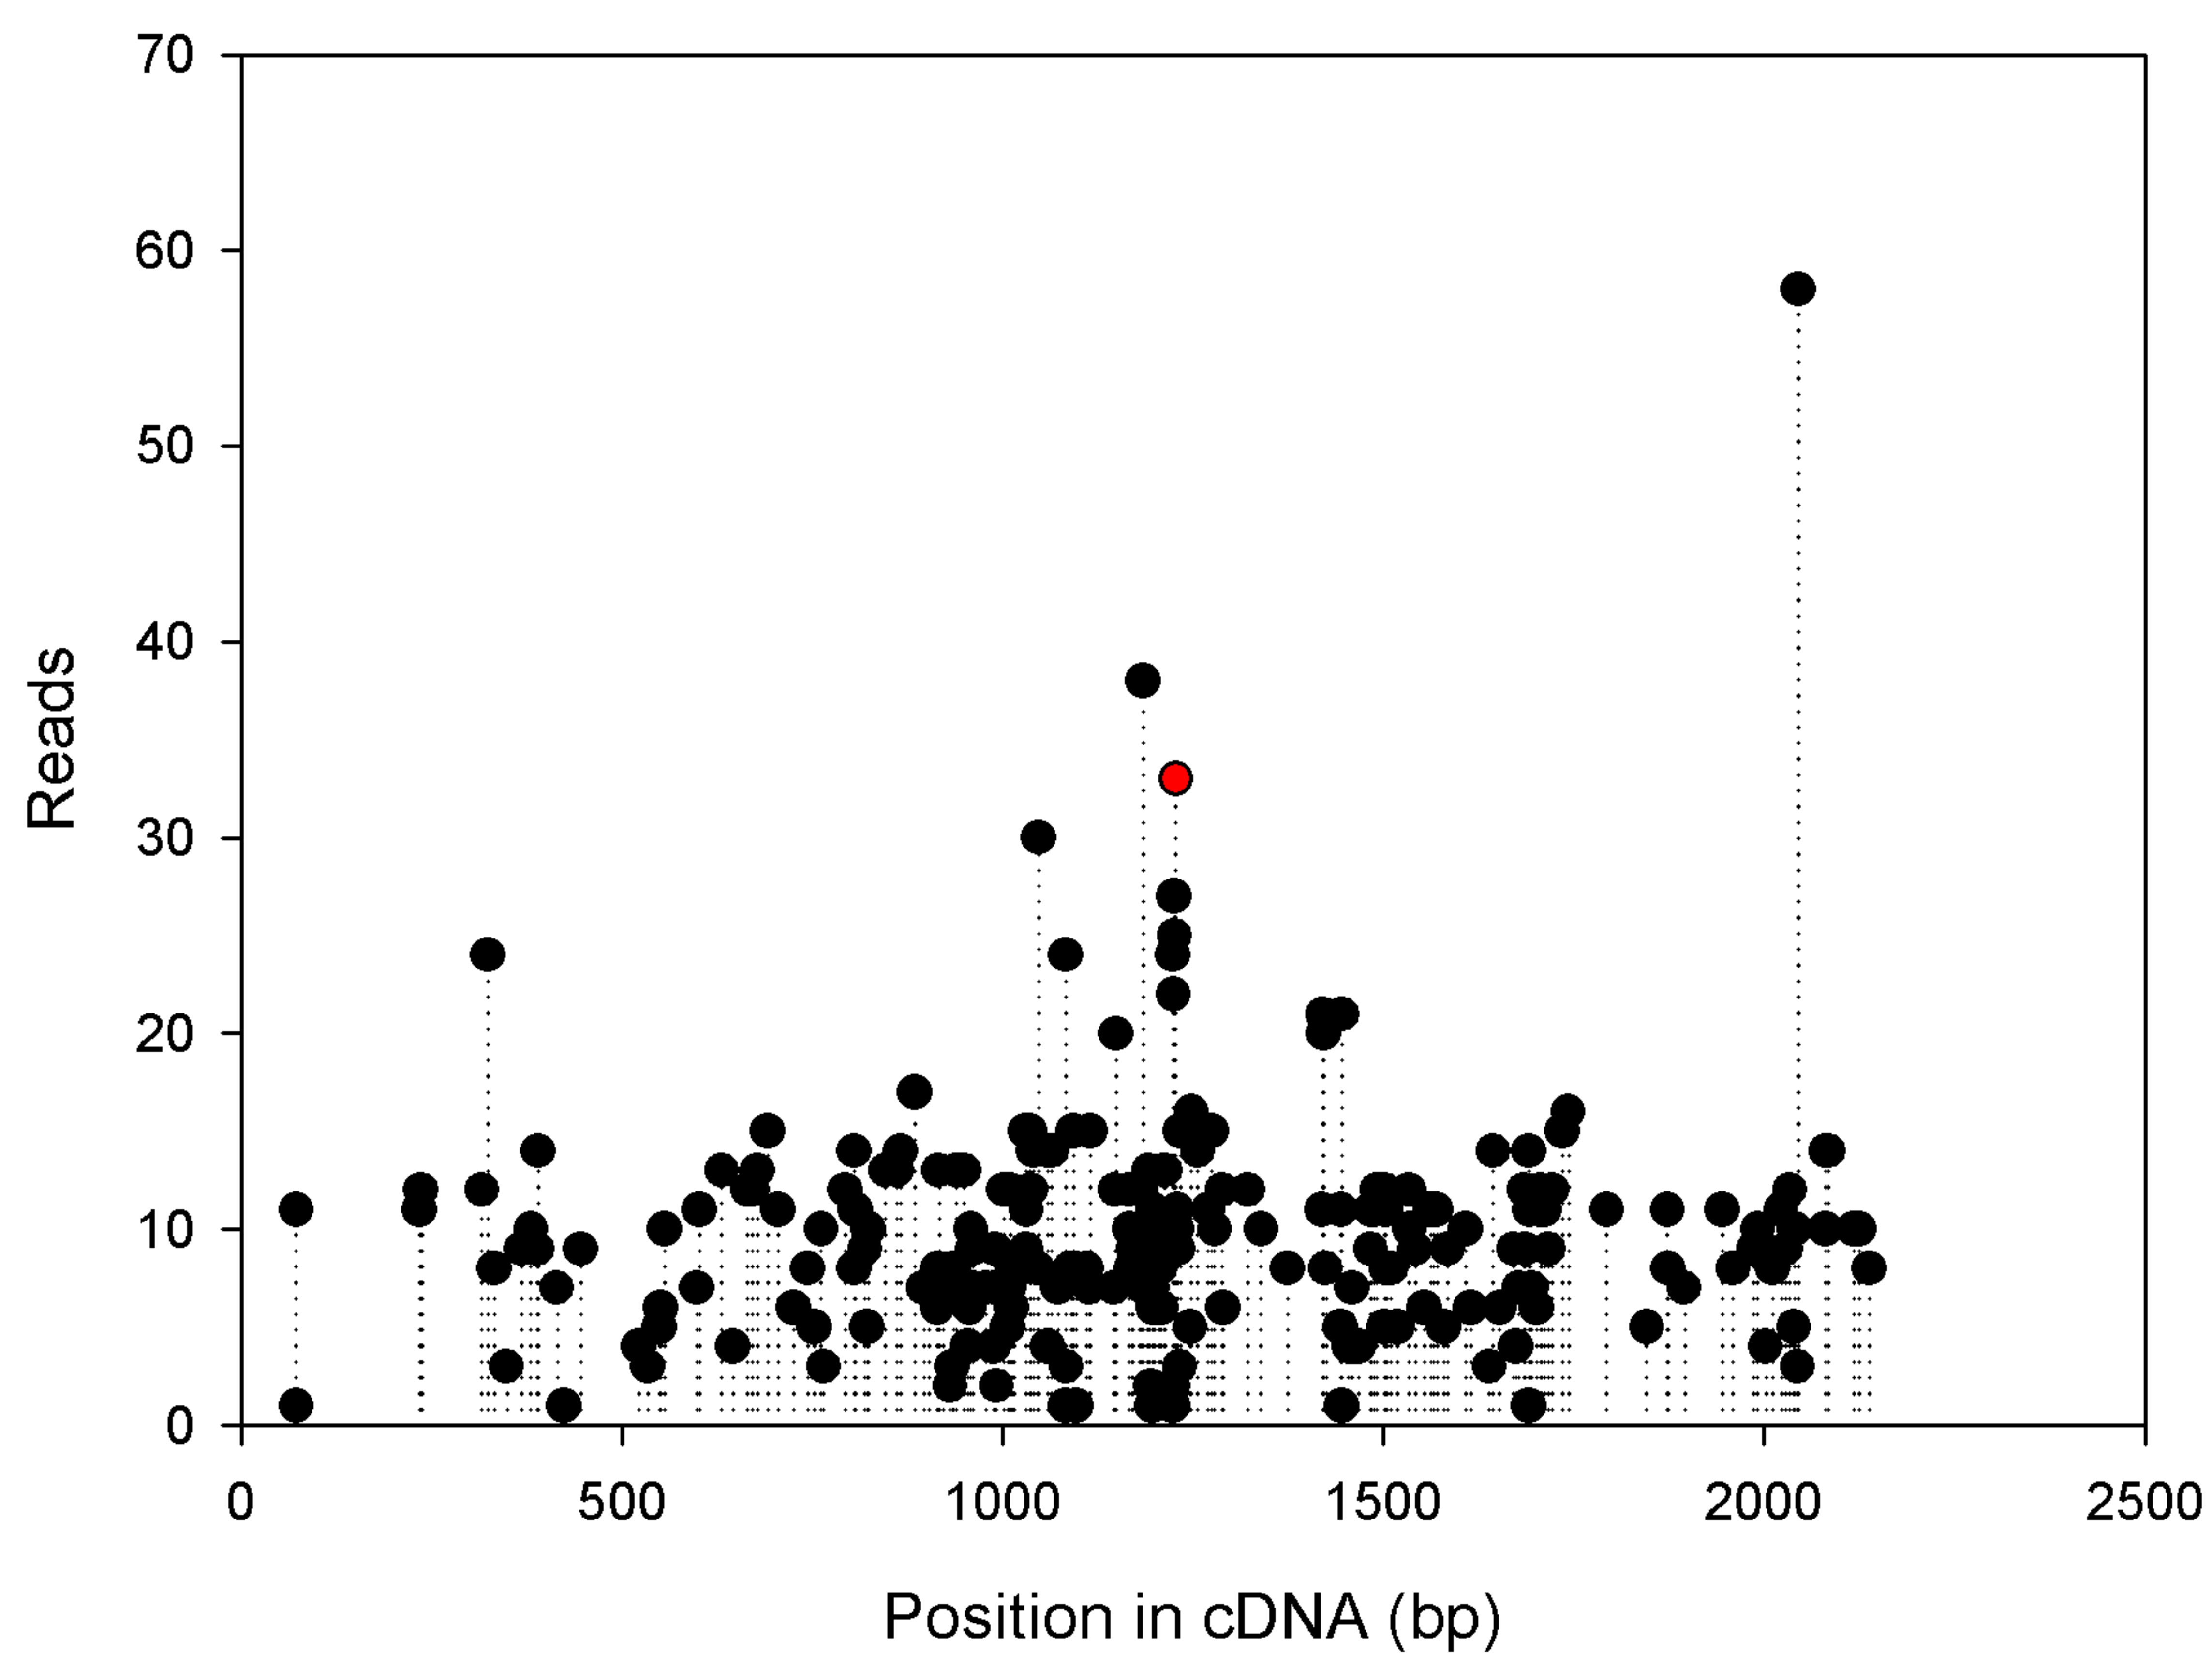

5' AAUUGAACCGUAUUUUCUG-AAUUCU 3'

Cs4g17040.1

.....

3' ----ACUUGUCAUAAAAGACGUUGU-- 5'

Csi-miR3954a-Cs5g04670.1-10

Csi-miR3954a-Cs5g04670.1-13, target=Cs7g13090.1 gene=Cs7g13090  
 Category:3  
 Score:5  
 Cleavage site:1413

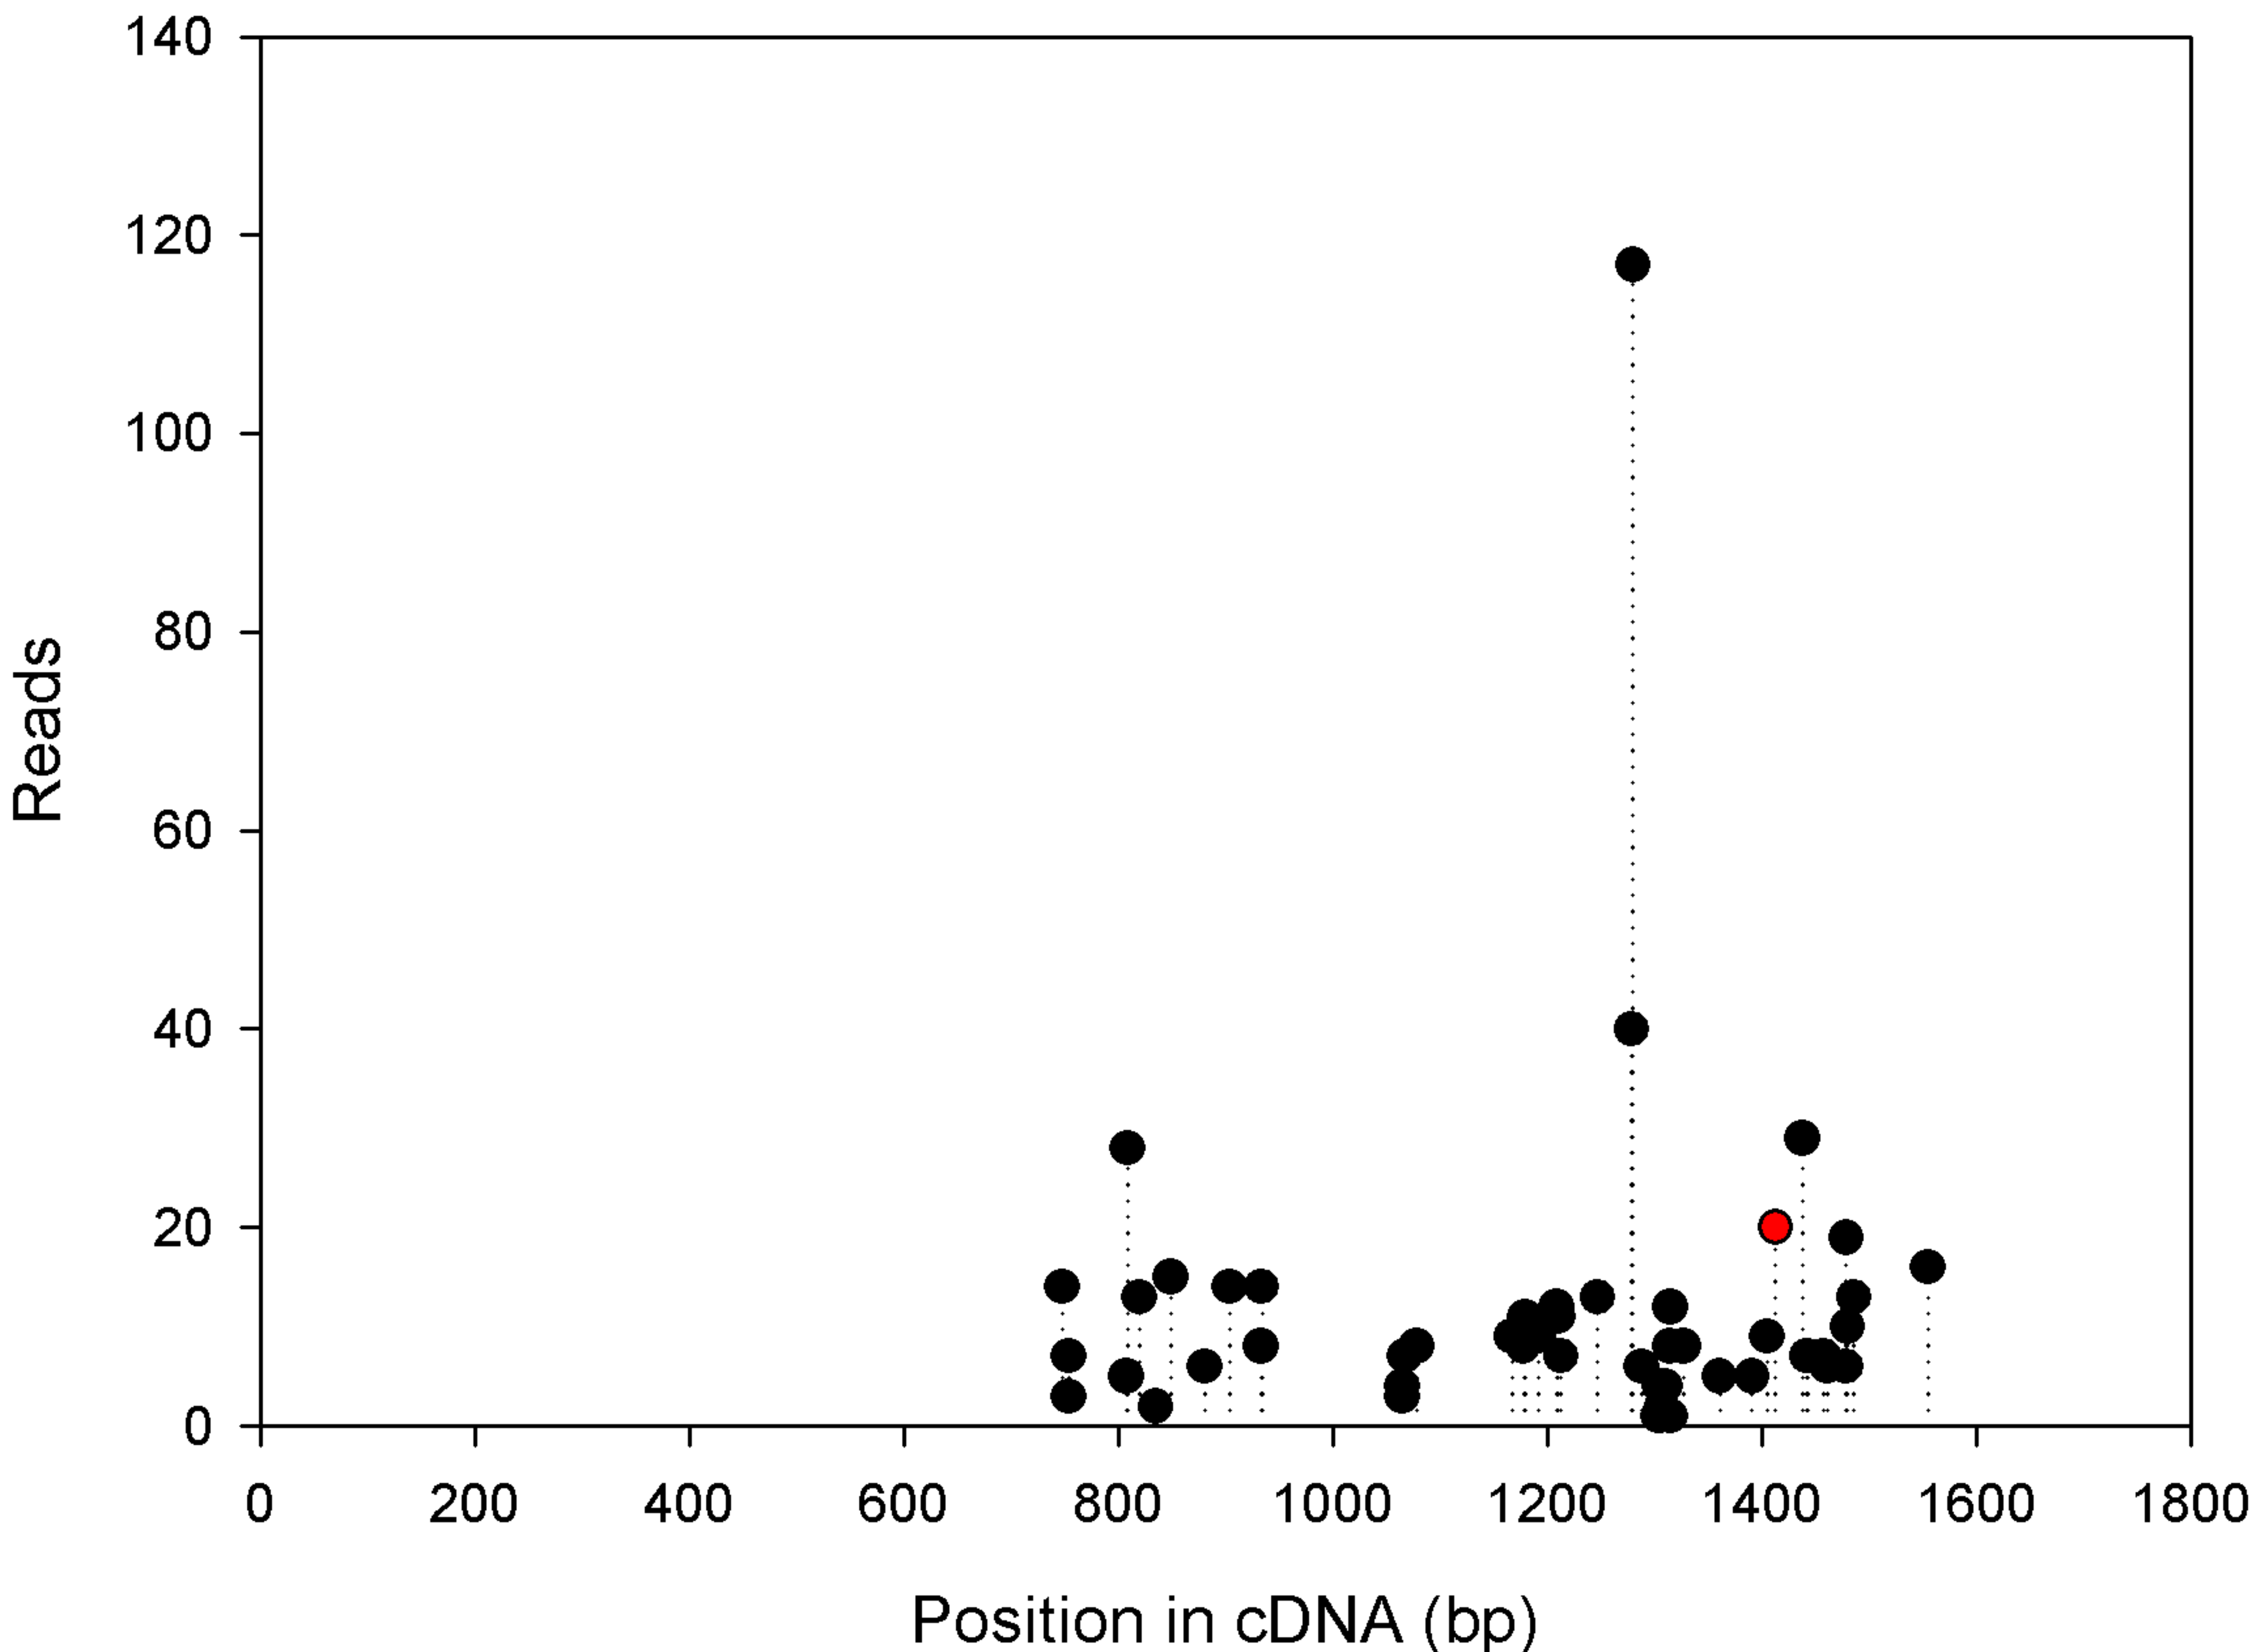

5' UUAUUGGAUU-UGAUUUGUAUAAUUGA 3'  
 . . . . . : : : : : : : : : : : :  
 3' -----UGUAGUACUAAAGAUUAUAAC- 5'

Cs7g13090.1  
 Csi-miR3954a-Cs5g04670.1-13

Csi-miR3954a-Cs5g04670.1-16, target=Cs9g03100.1 gene=Cs9g03100  
 Category:3  
 Score:5  
 Cleavage site:2657

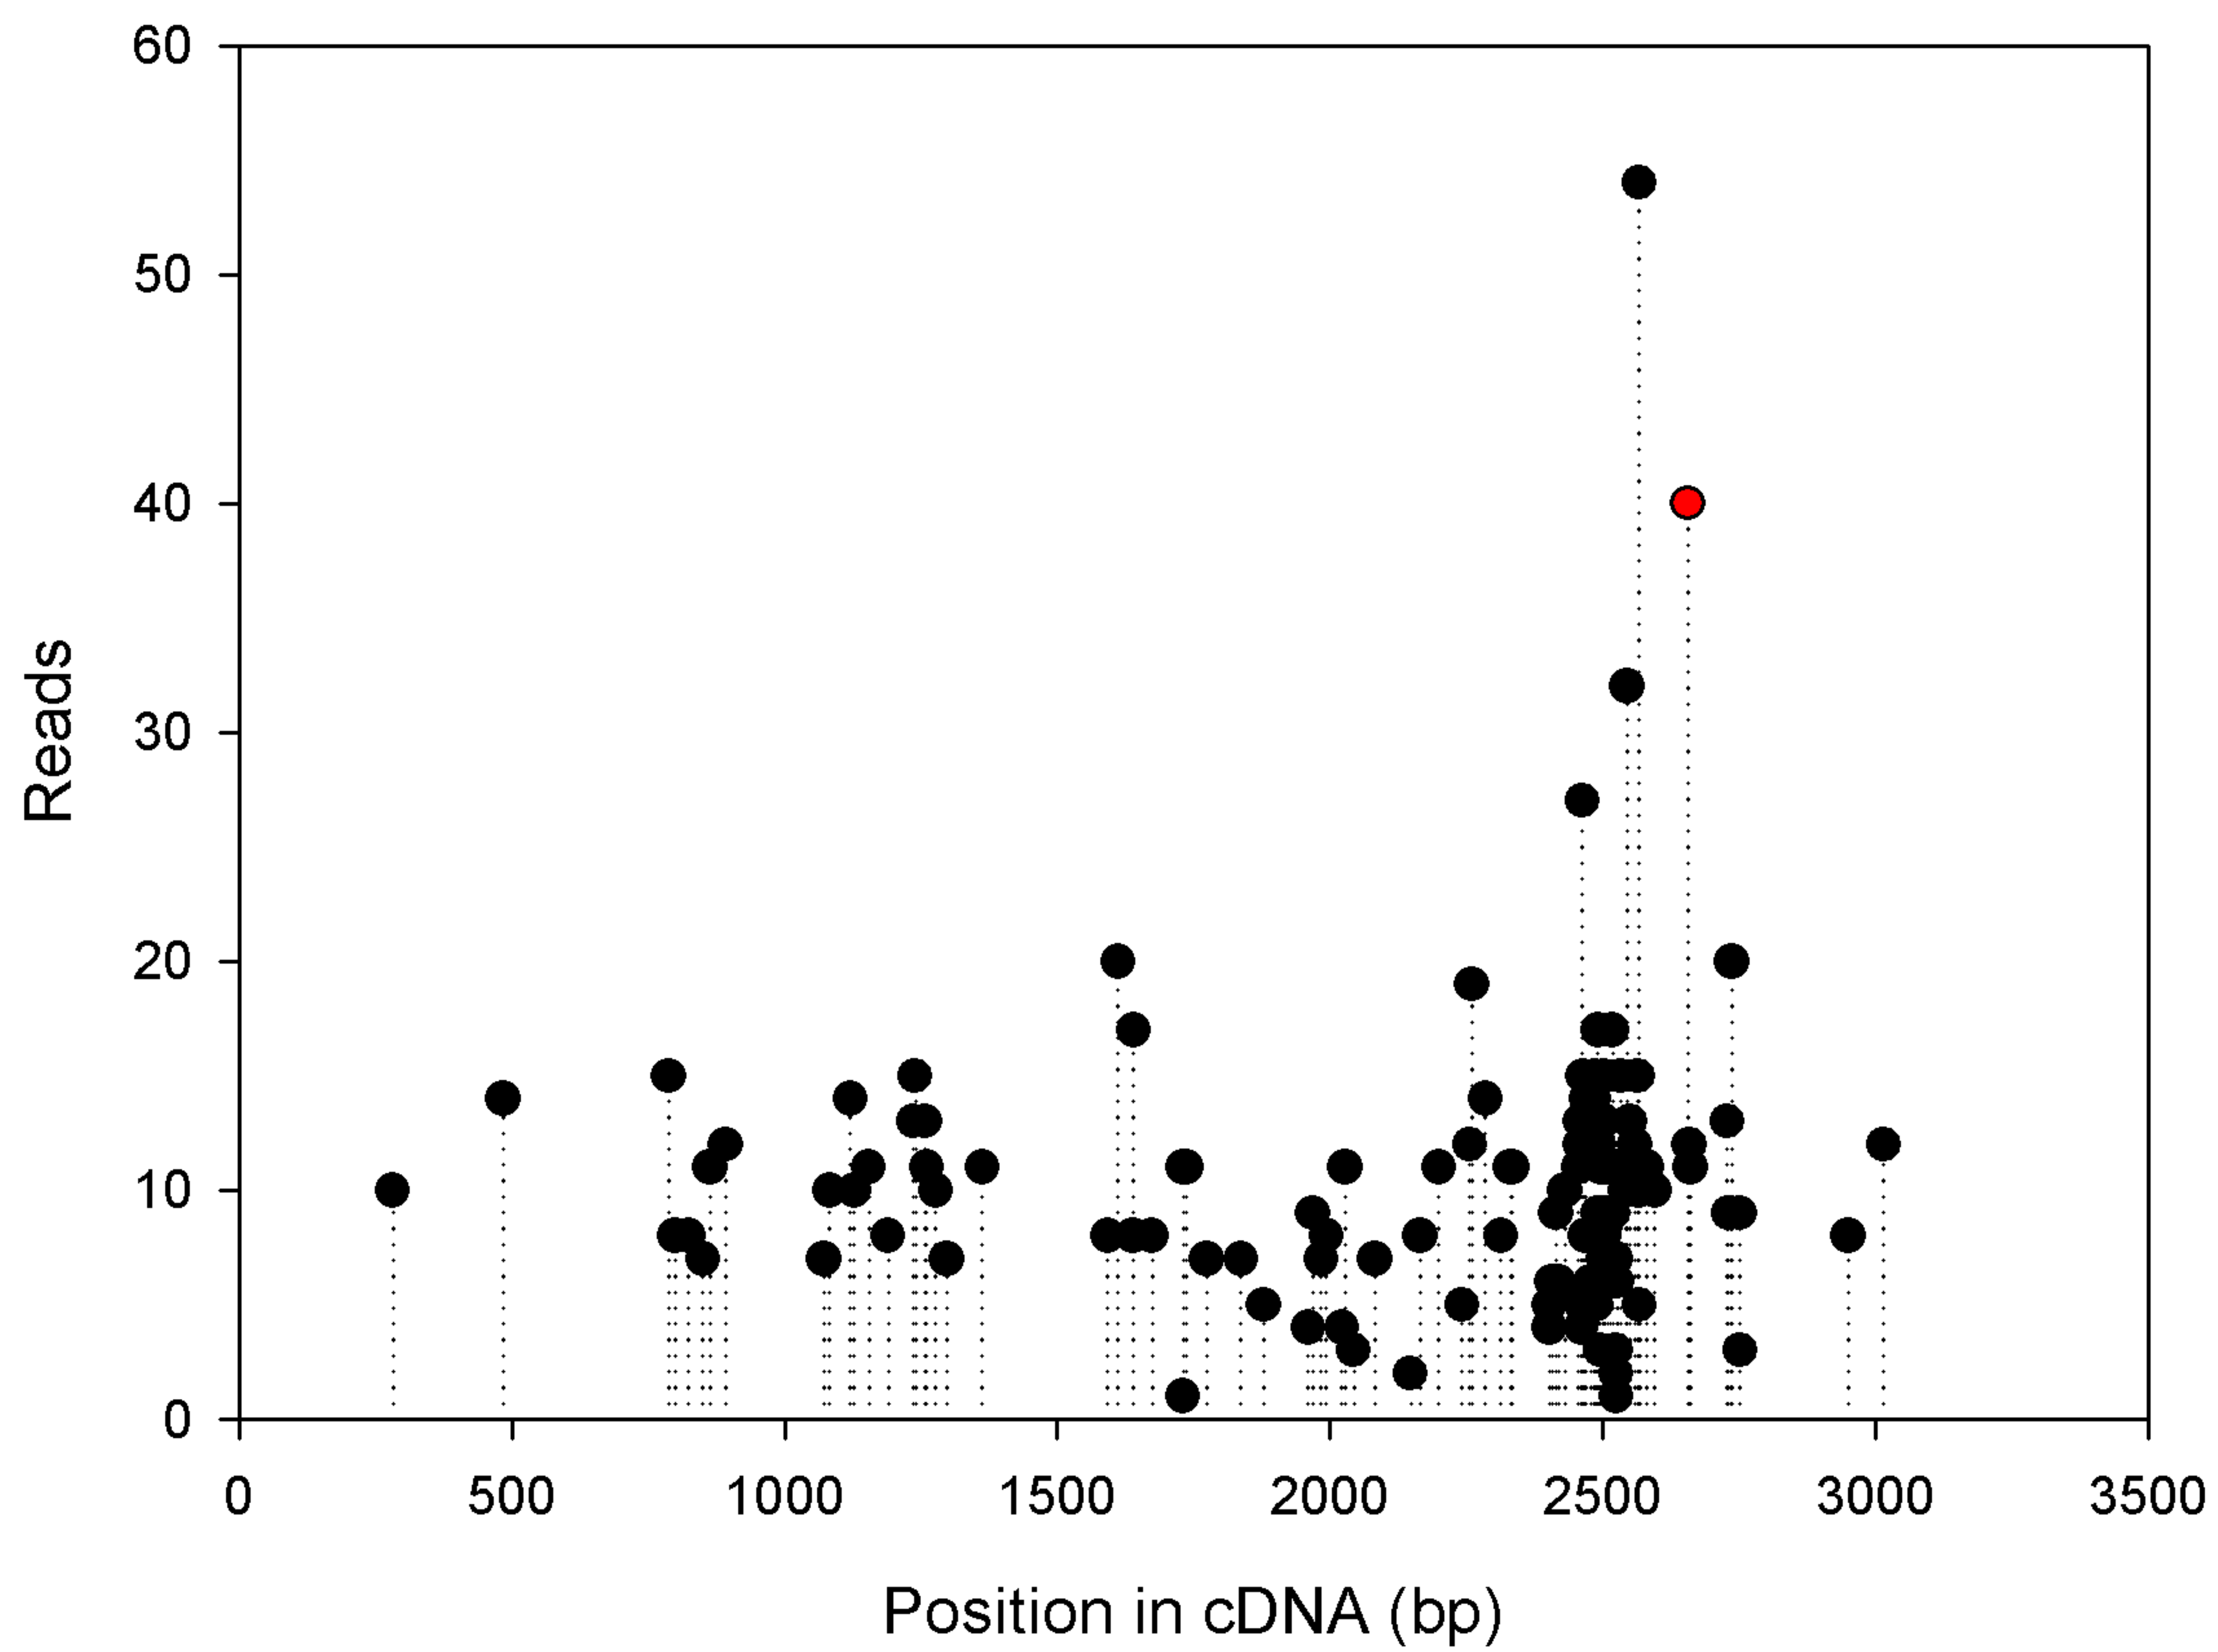

```

5' GAAAUUGA-GUGGAAAAGCUGGUUUUC 3'      Cs9g03100.1
   ::  ::::  ::.....::
3' -UUCAACUACAUUUUUUCGACA----- 5'      Csi-miR3954a-Cs5g04670.1-16
  
```

Csi-miR3954a-Cs5g04670.1-21, target=Cs3g25700.1 gene=Cs3g25700  
 Category:3  
 Score:5  
 Cleavage site:989

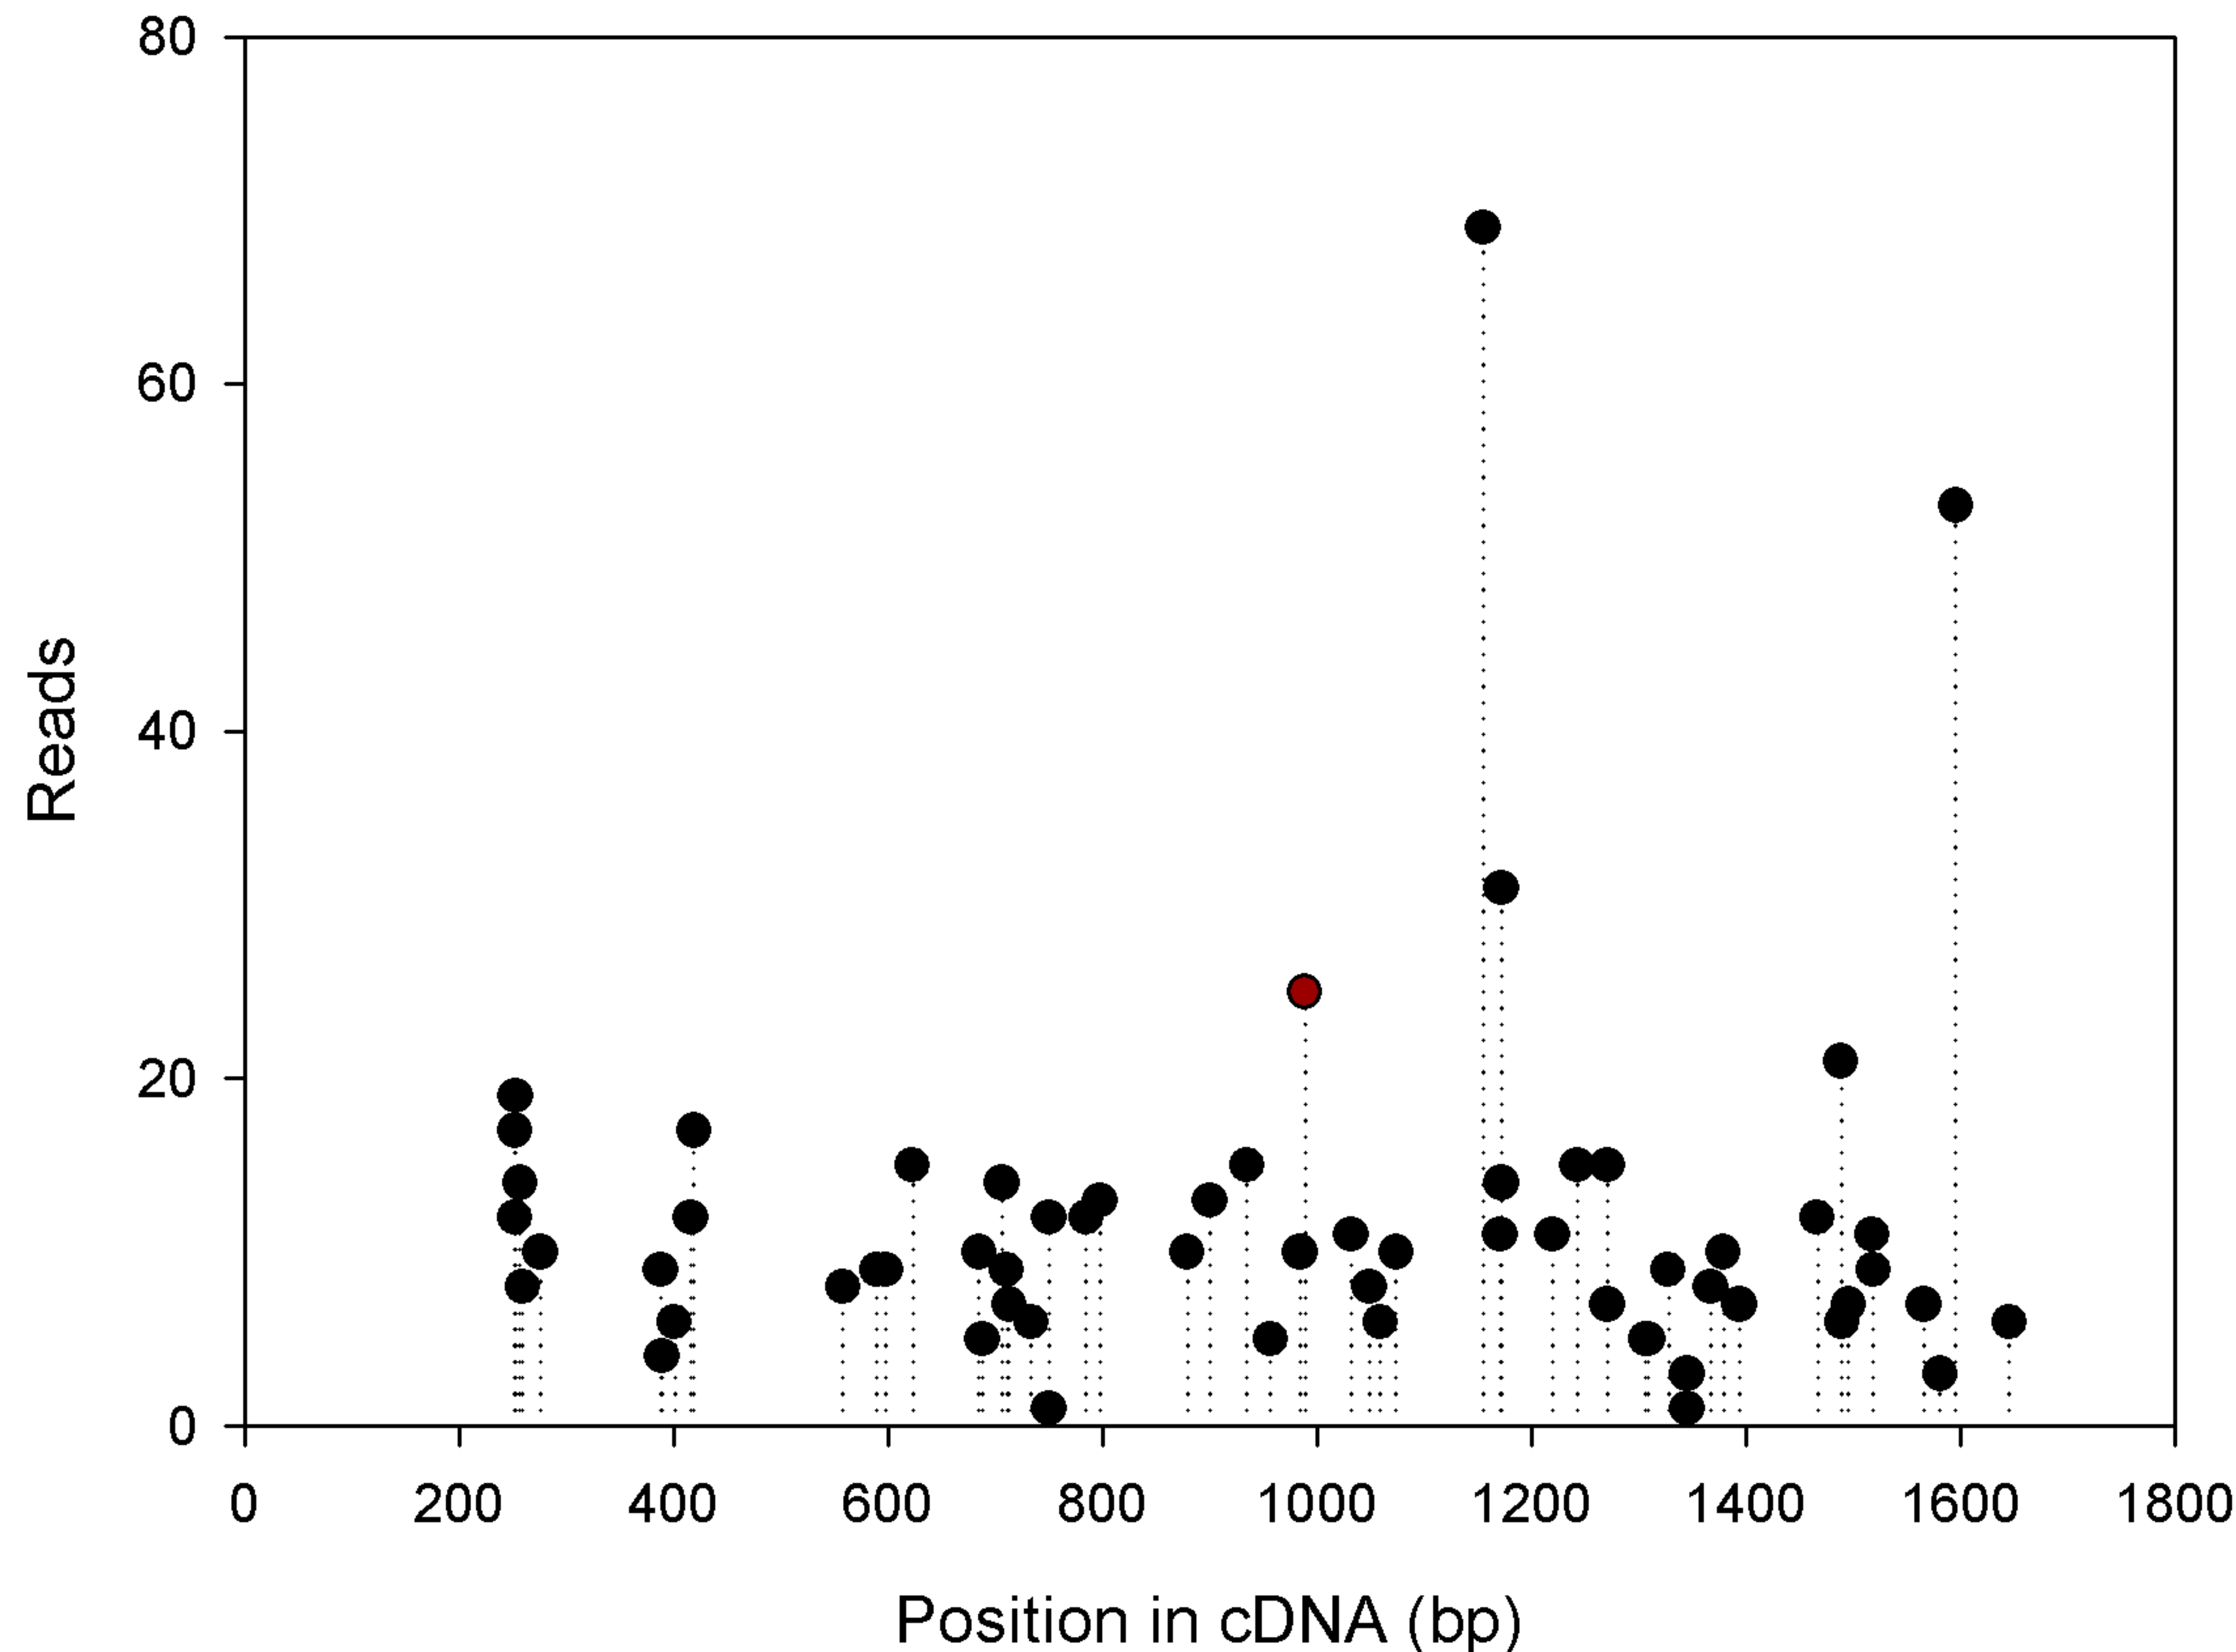

5' CAGCUCAAUCAGAUGCCAAAU-CUGAG 3'  
 :::::::::::::::::::: :::  
 3' -----CUUAGUCUACGGUUUACCACU- 5'

Cs3g25700.1  
 Csi-miR3954a-Cs5g04670.1-21

Csi-miR3954a-Cs7g22460.1-15, target=Cs7g06320.1 gene=Cs7g06320

Category:3

Score:5

Cleavage site:109

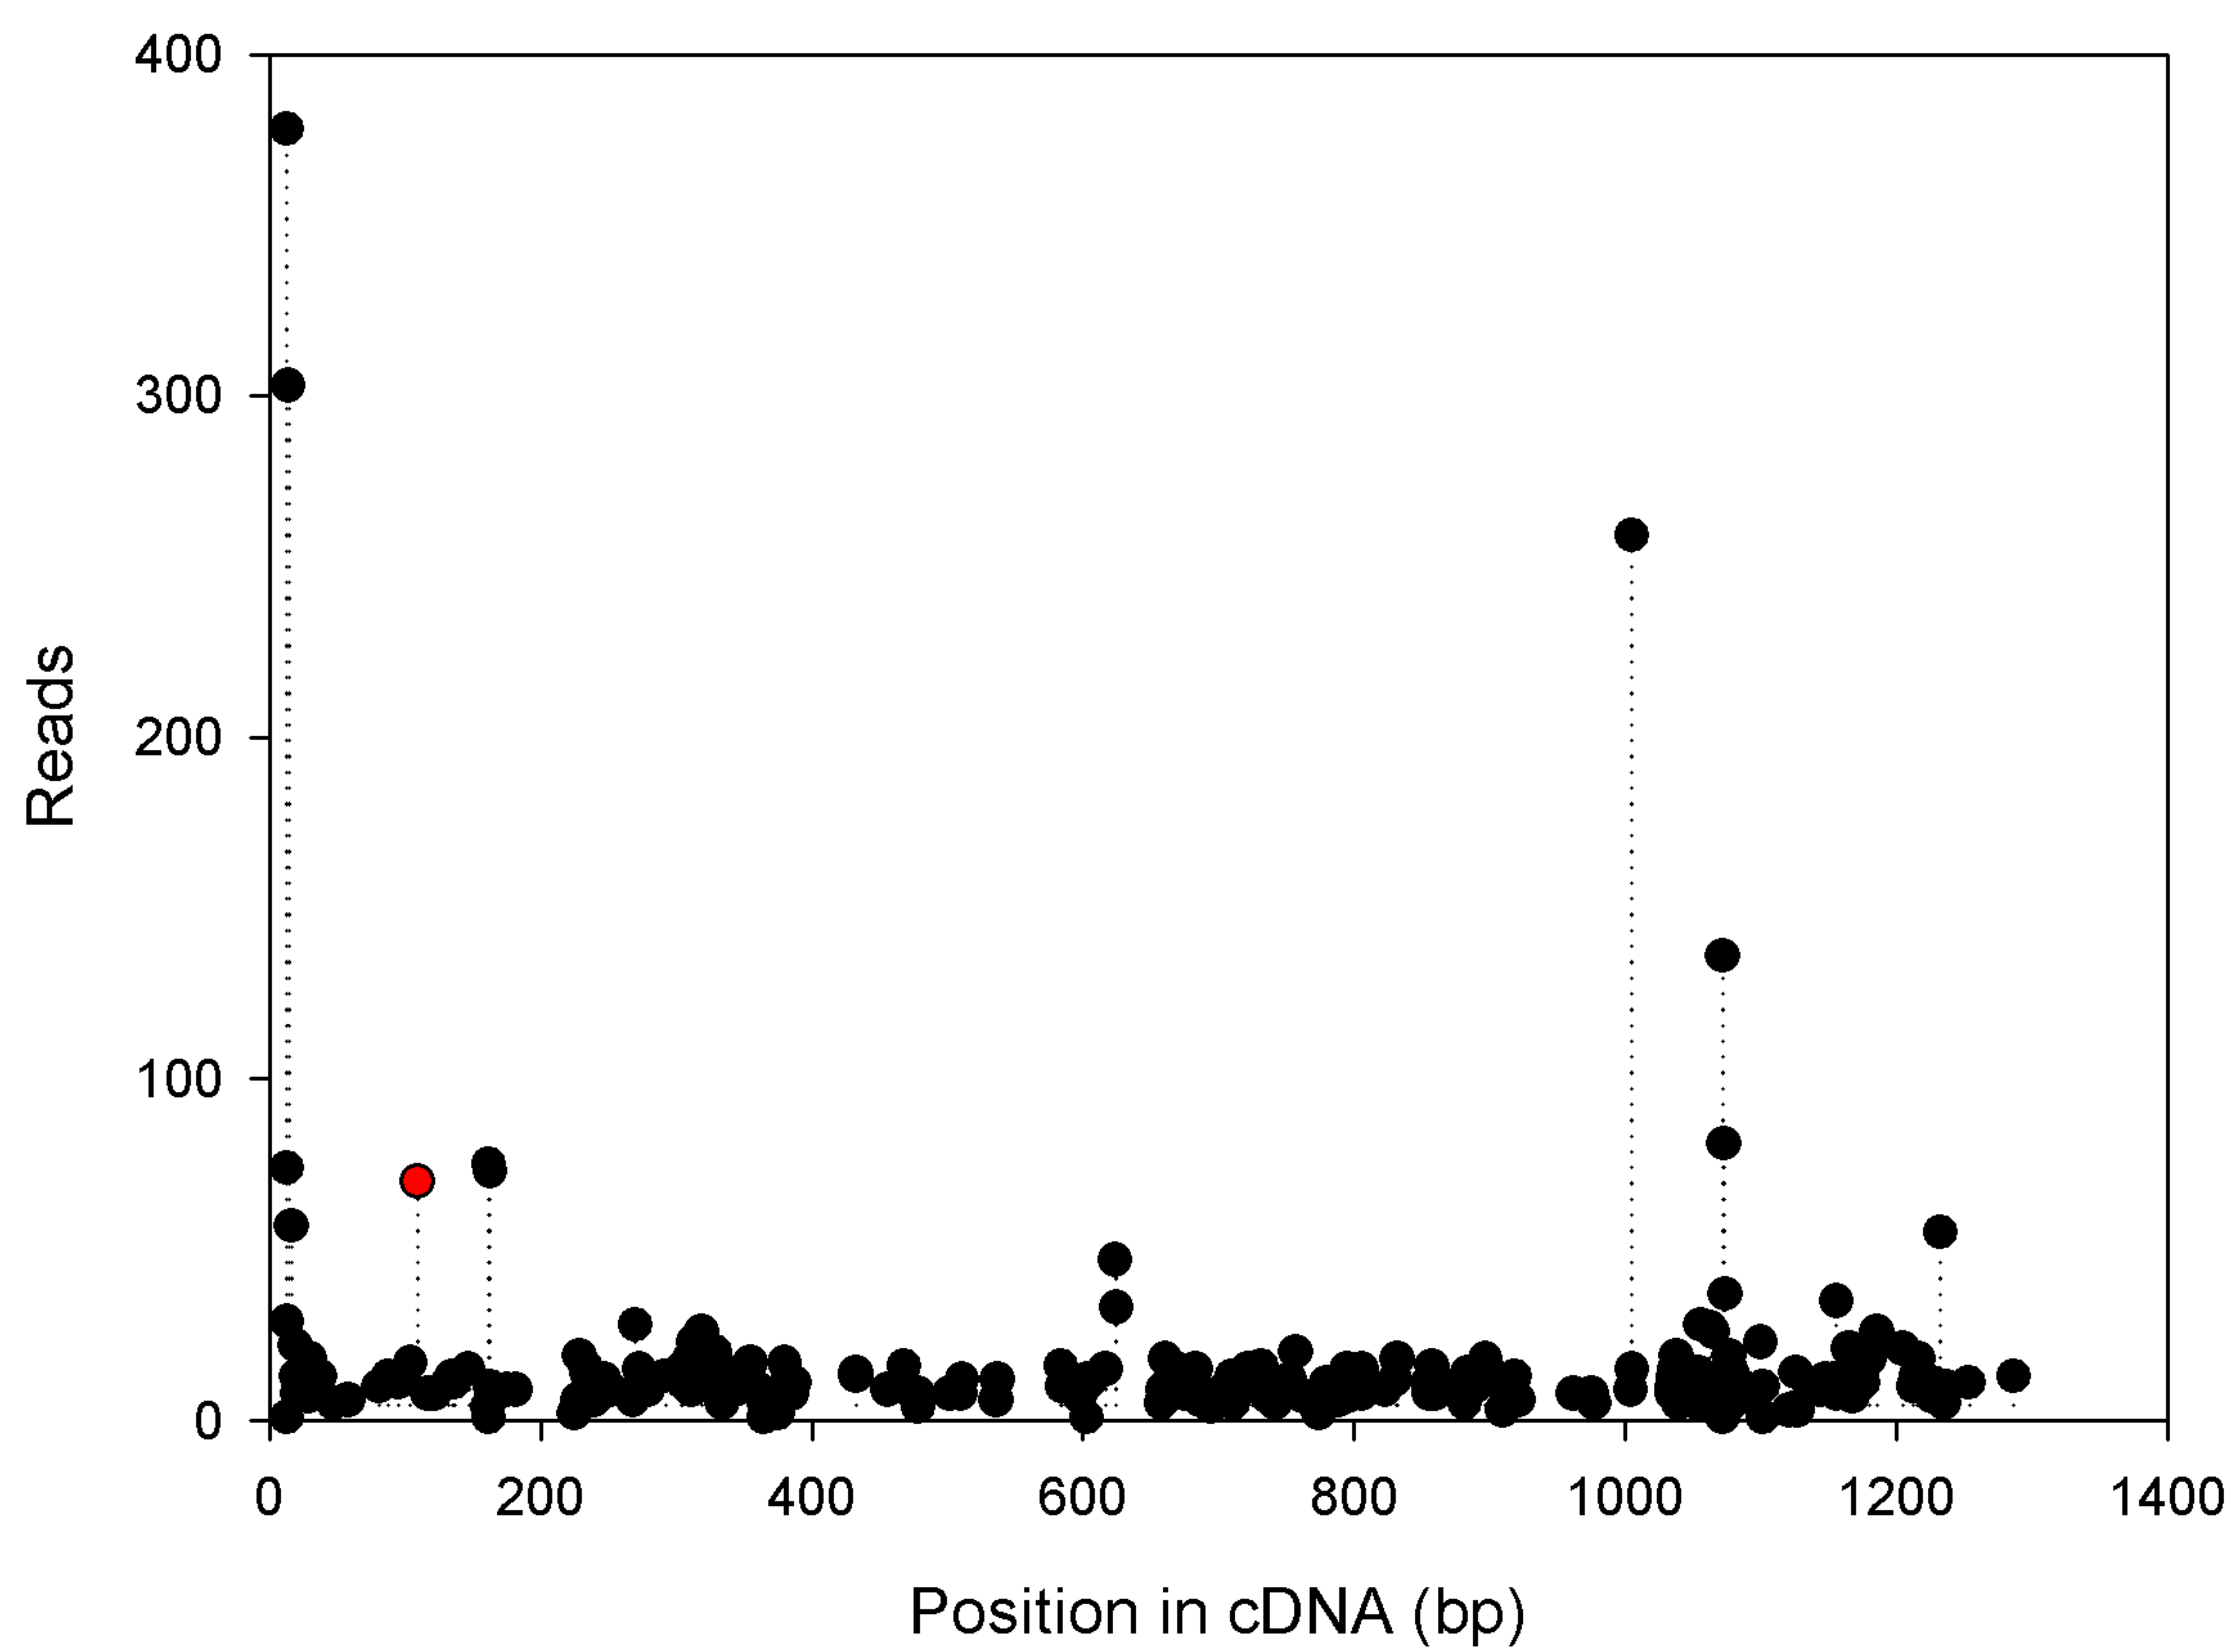

5' CGCAUAUAUUUUCUUUUUCAAGUUCU 3'

Cs7g06320.1

: : : : : : : : : : : : : : : : : : : : :

3' ACCUUUAUAAAAAAAAAAGUU----- 5'

Csi-miR3954a-Cs7g22460.1-15

Csi-miR3954a-Cs7g22460.1-2, target=Cs3g07280.1 gene=Cs3g07280  
 Category:2  
 Score:4  
 Cleavage site:2828

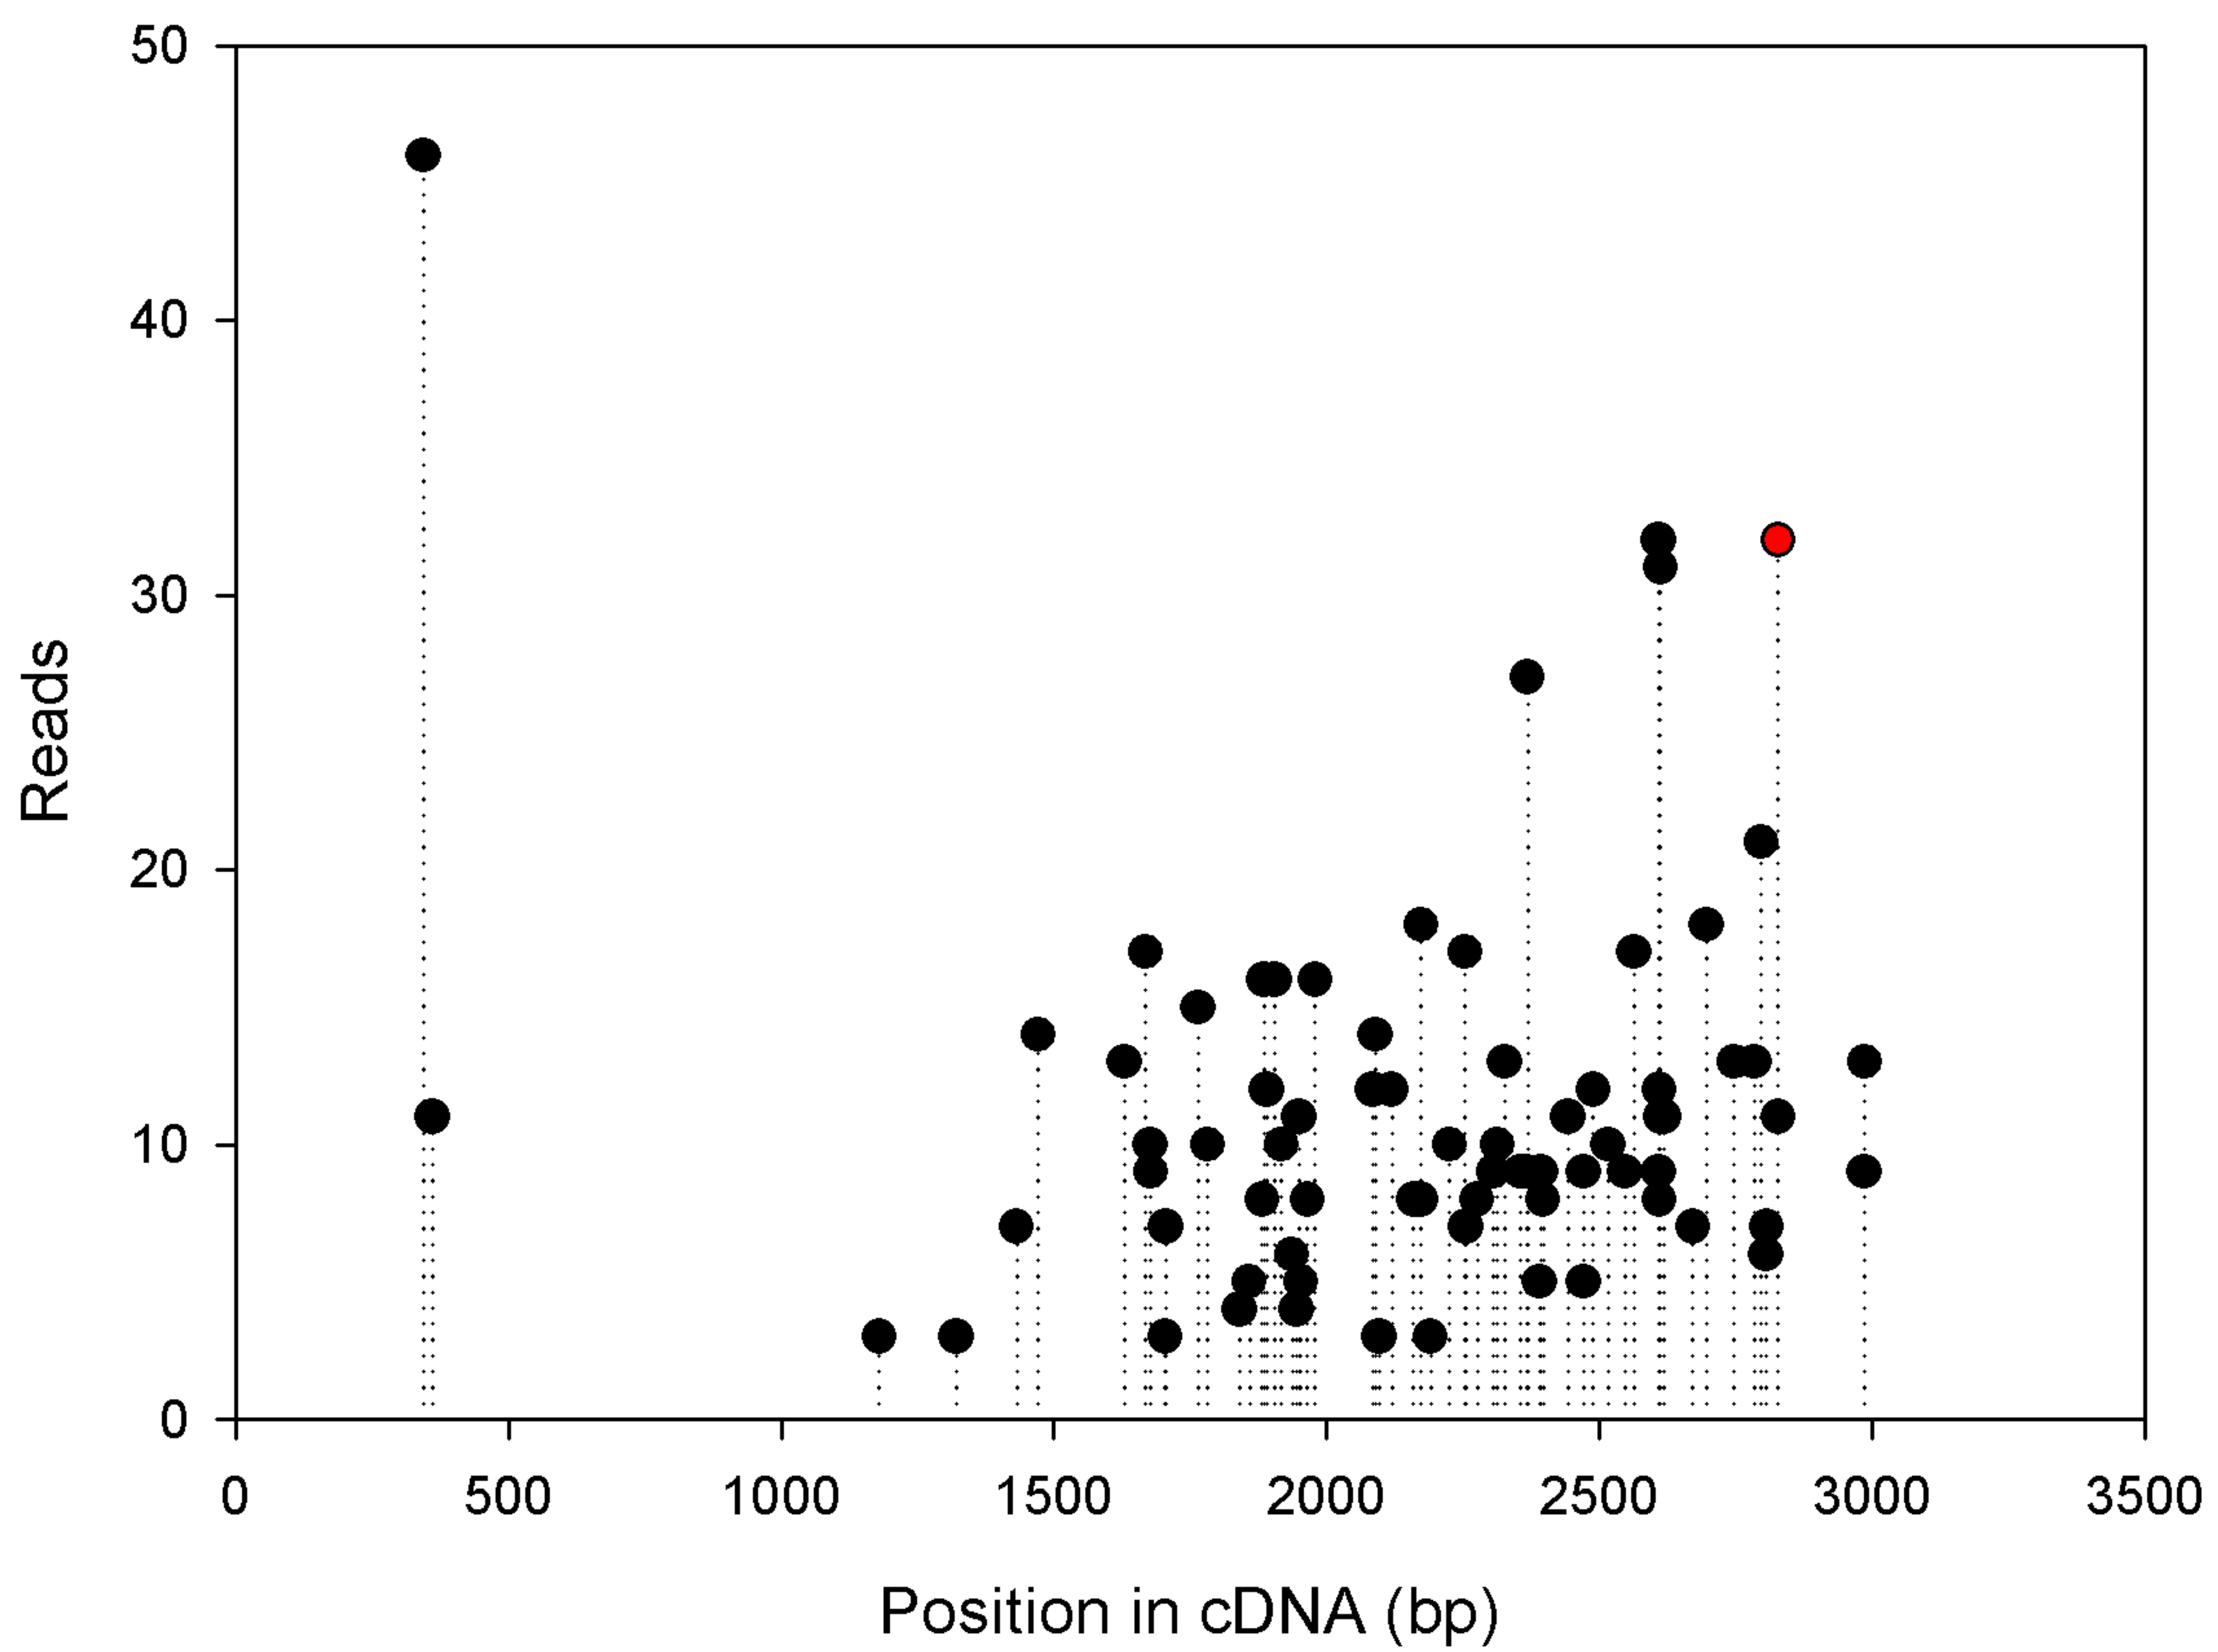

```
5' UACUG-AAAUUUAGCUGUAUGATGCCA 3'
   . : : : : : : : : : : : : :
3' GUGCUGUGUAAAUCGACAUAC----- 5'
```

Cs3g07280.1

Csi-miR3954a-Cs7g22460.1-2

Csi-miR3954a-Cs7g22460.1-2, target=Cs6g18000.1 gene=Cs6g18000  
 Category:3  
 Score:5  
 Cleavage site:371

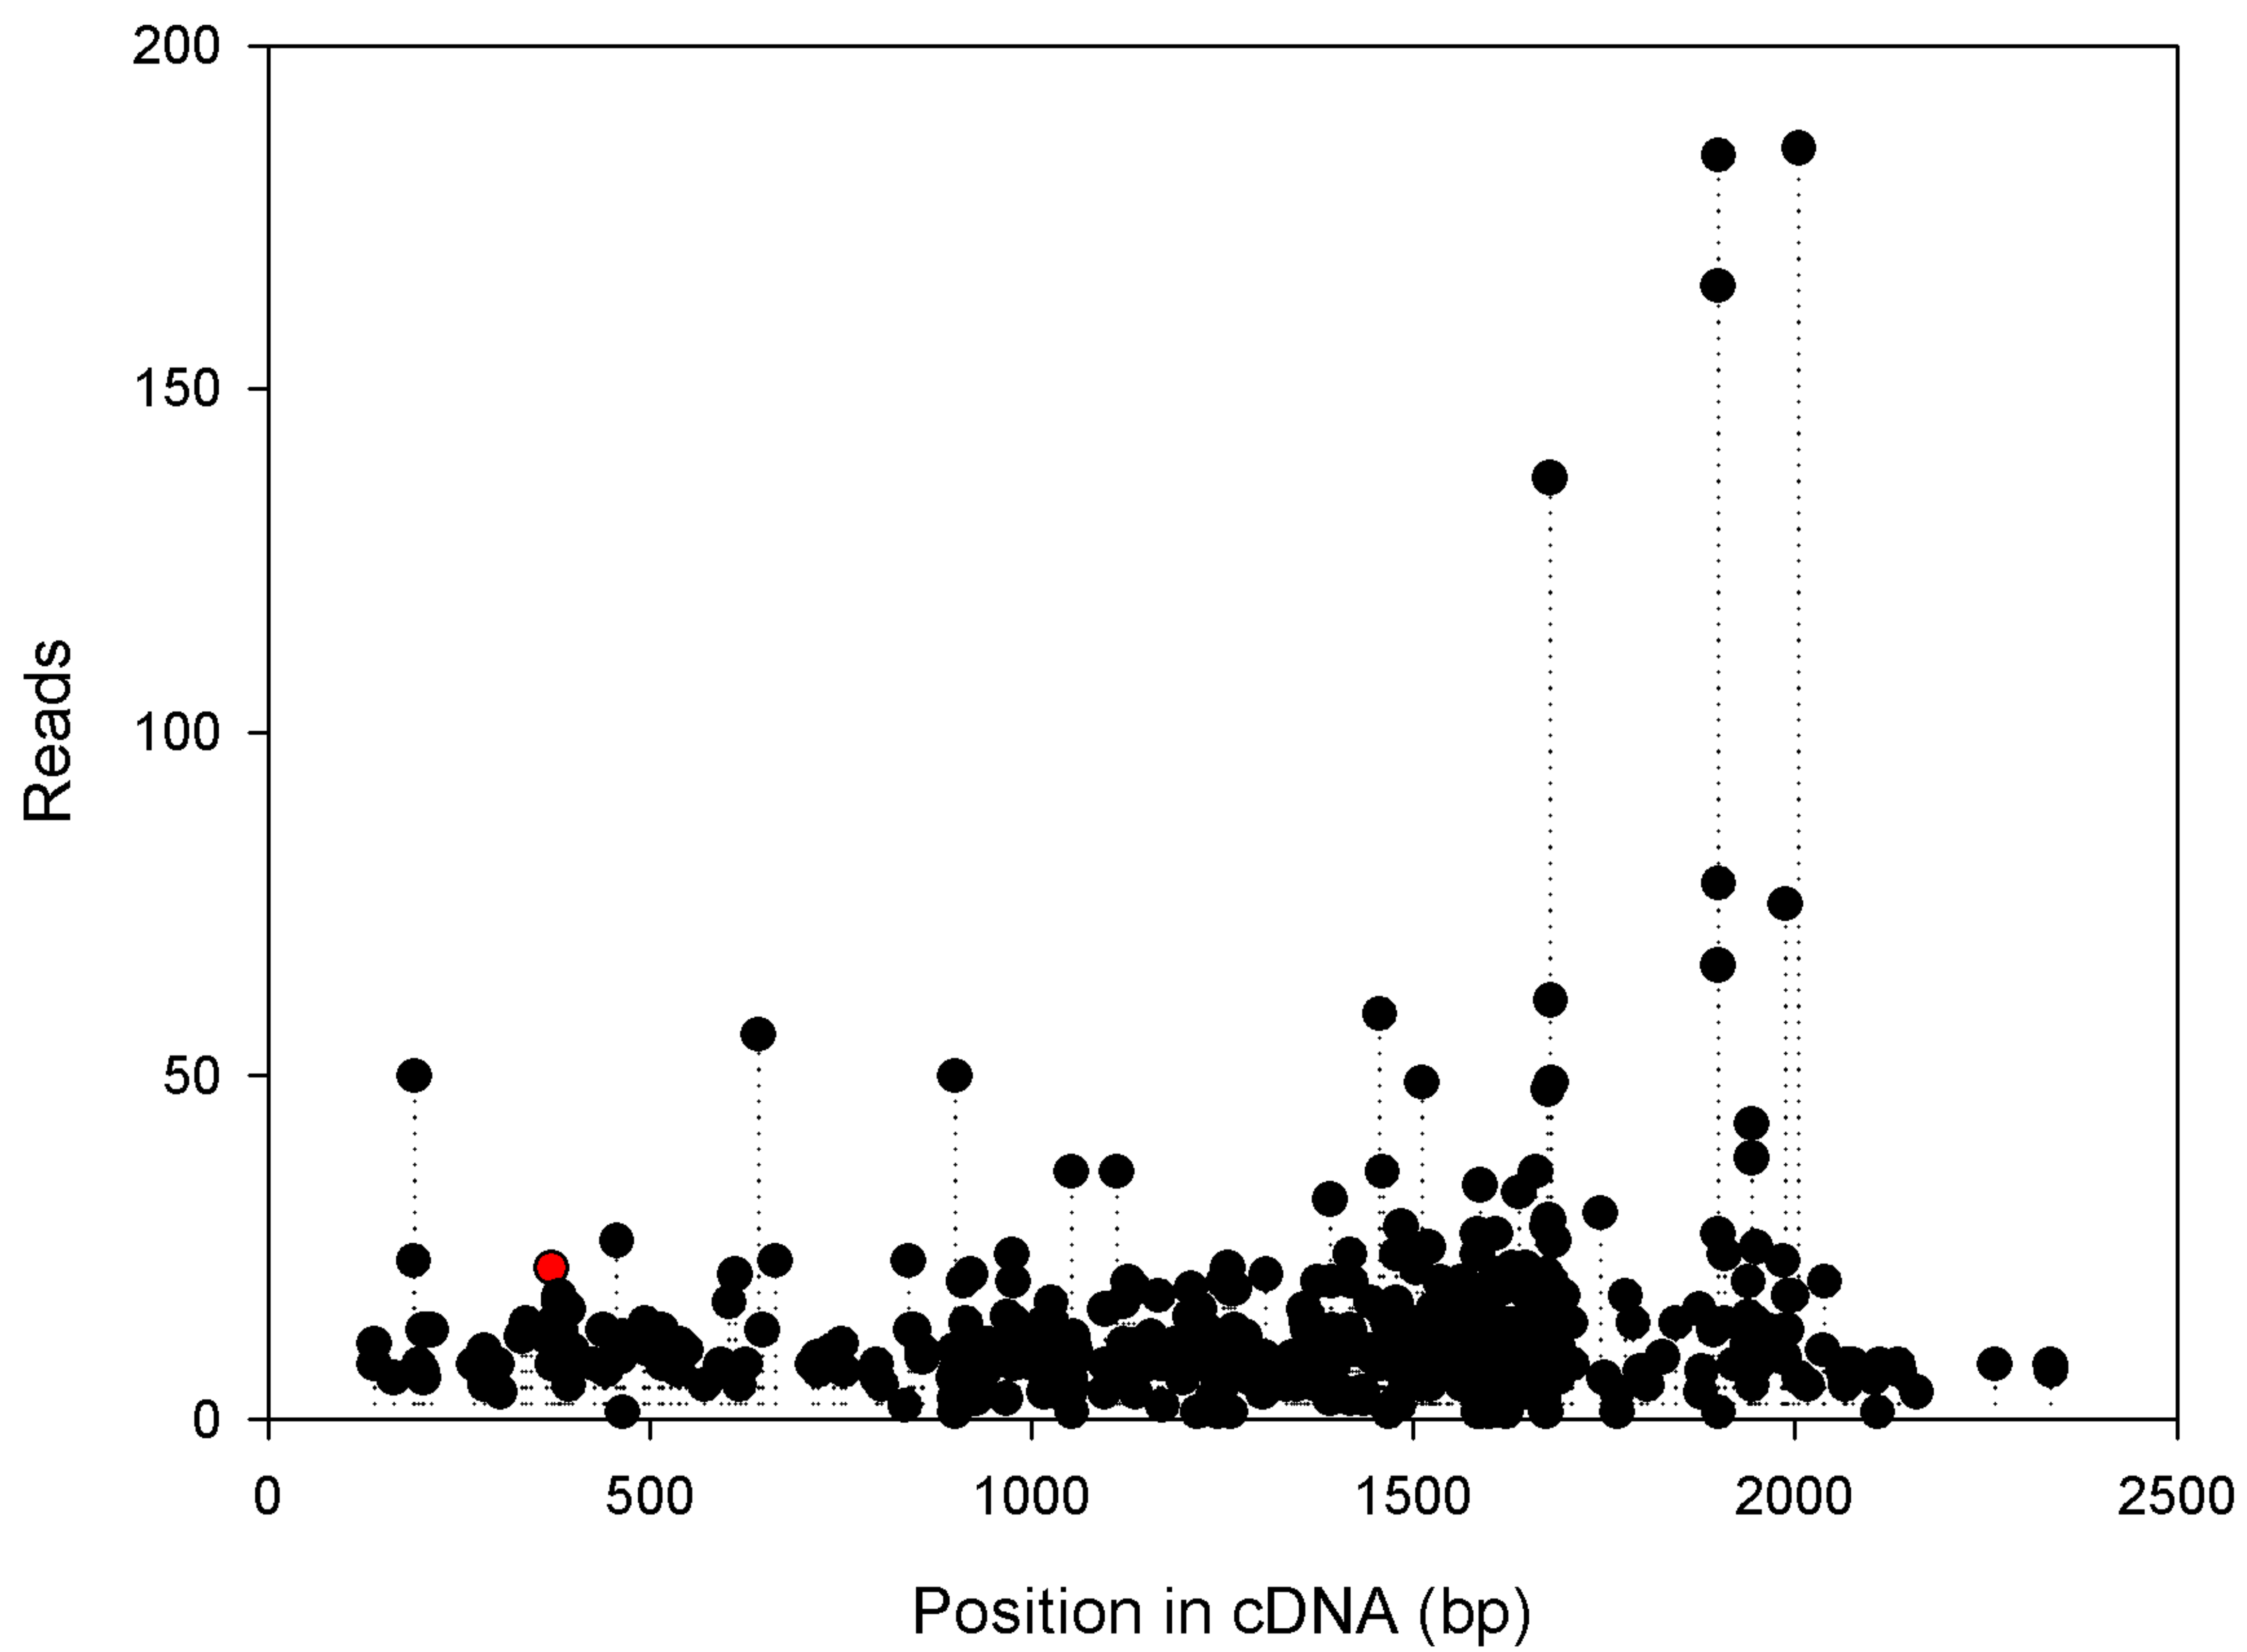

```
5' UGUCUGAAAGAUUUGGCUGUAUGCAU 3'
   . . . . . : : : : : : : : : : :
3' --GUGCUGUGUAAAUCGACAUAC--- 5'
```

Cs6g18000.1

Csi-miR3954a-Cs7g22460.1-2

Csi-miR3954a-Cs7g22460.1-8, target=Cs9g06660.1 gene=Cs9g06660  
 Category:3  
 Score:4  
 Cleavage site:798

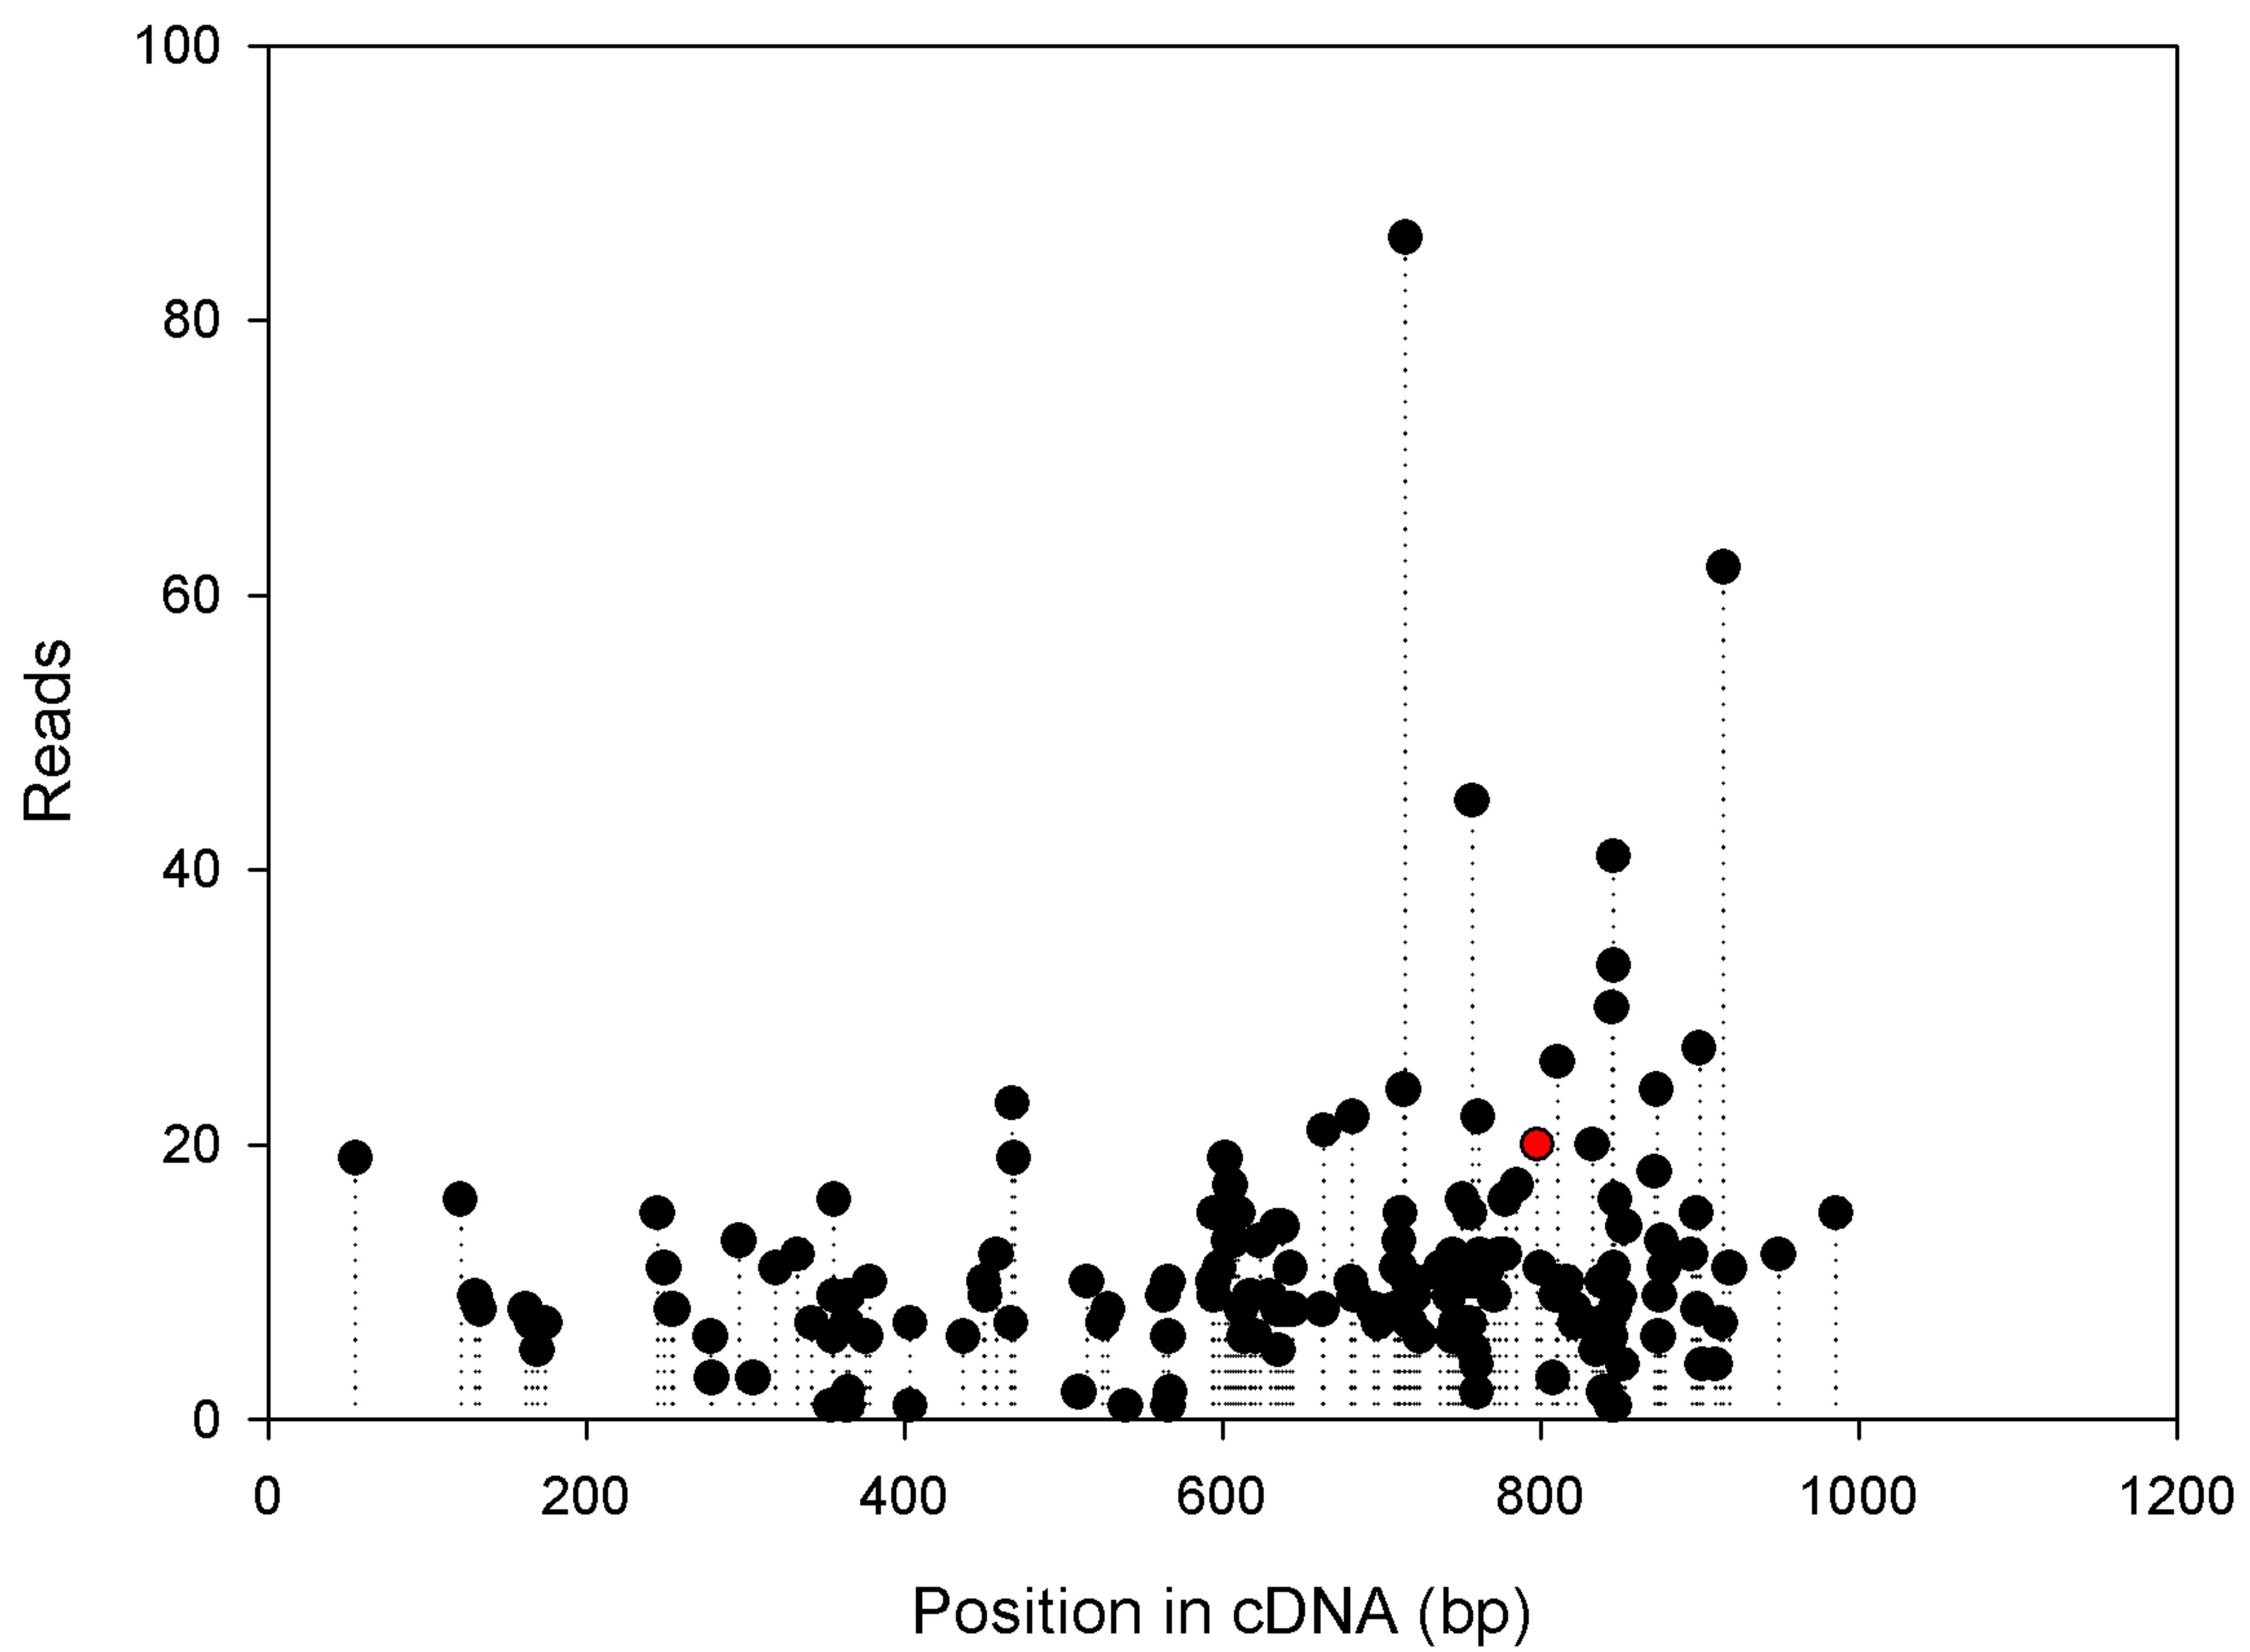

```

5' UUGUGAUCAUUUACUUGUUUGUAUUC 3'
   :::  ::::::::::::::::::::
3' -----UAGACAAUGAACAAGUAUAAG 5'
  
```

Cs9g06660.1

Csi-miR3954a-Cs7g22460.1-8



Csi-miR482a-3p-Cs5g18480.1-15, target=Cs7g01530.1 gene=Cs7g01530  
 Category:3  
 Score:5  
 Cleavage site:1936

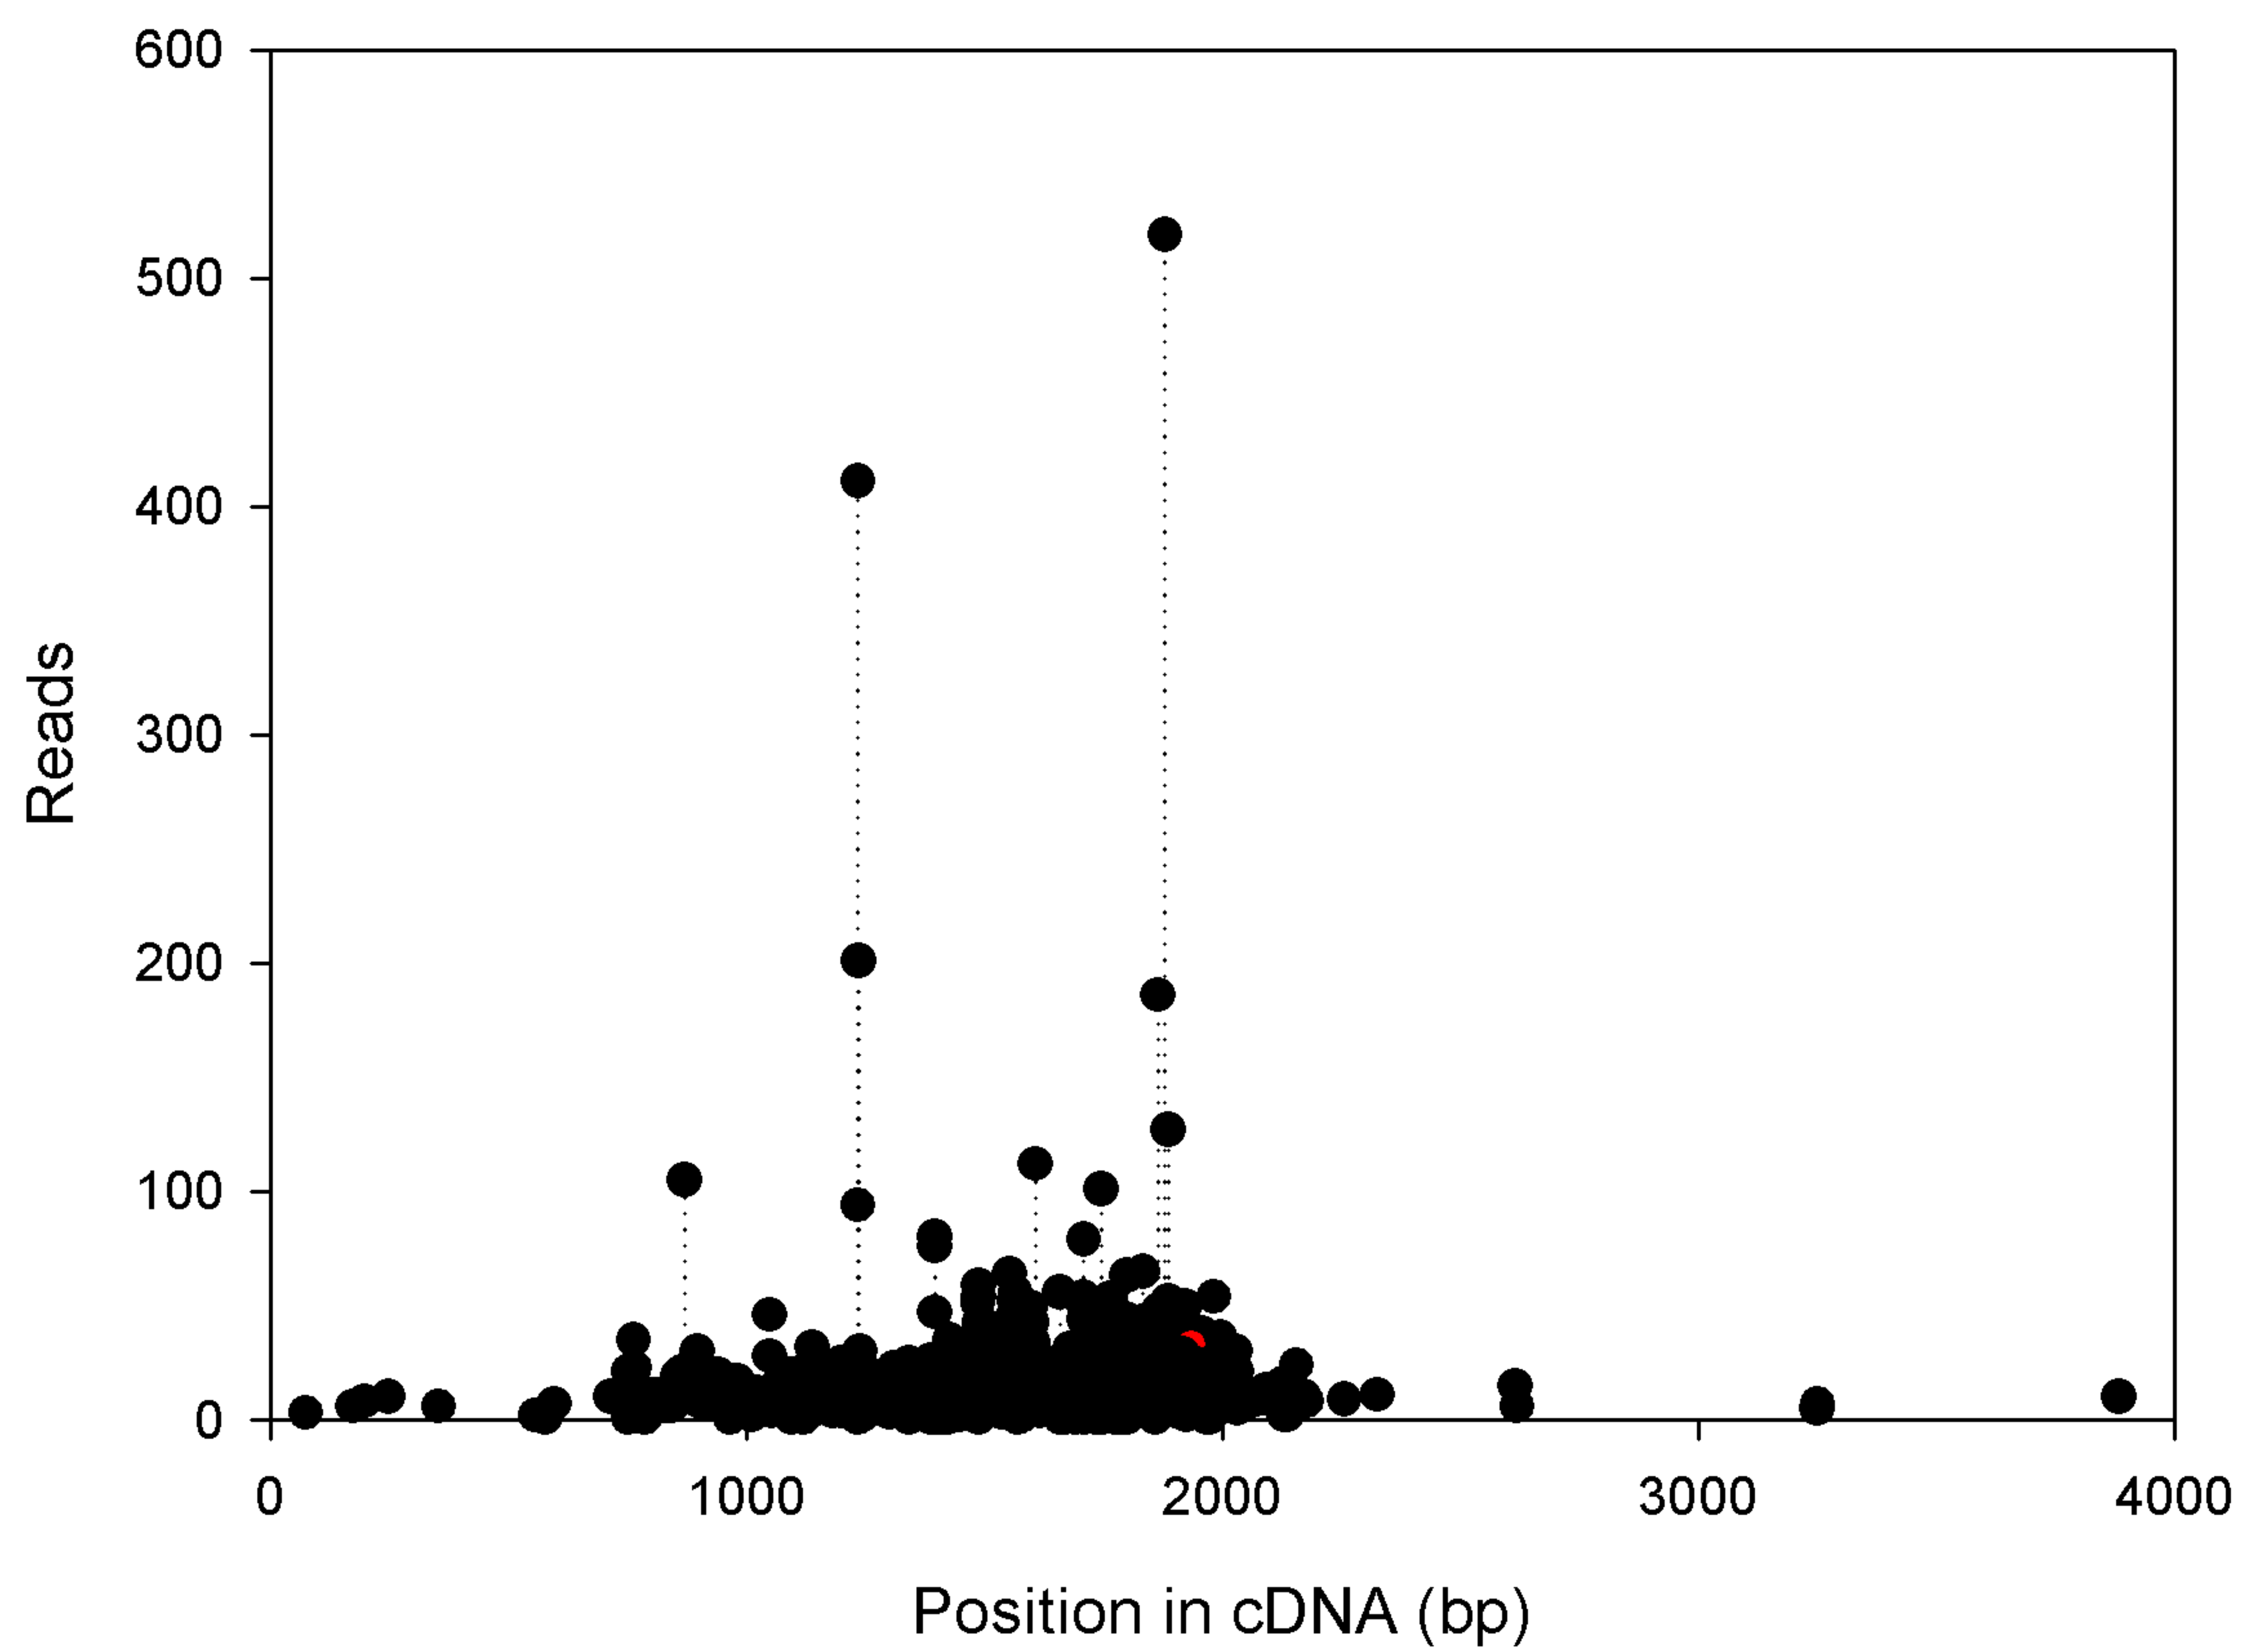

5' UUGU-AUGAUCCCACUCCACUUUUGU 3'

Cs7g01530.1

.....

3' AAUACUAUUAGGAUGAAGGUU----- 5'

Csi-miR482a-3p-Cs5g18480.1-15

Csi-miR482a-3p-Cs5g18480.1-18, target=Cs3g05730.1 gene=Cs3g05730  
 Category:1  
 Score:5  
 Cleavage site:732

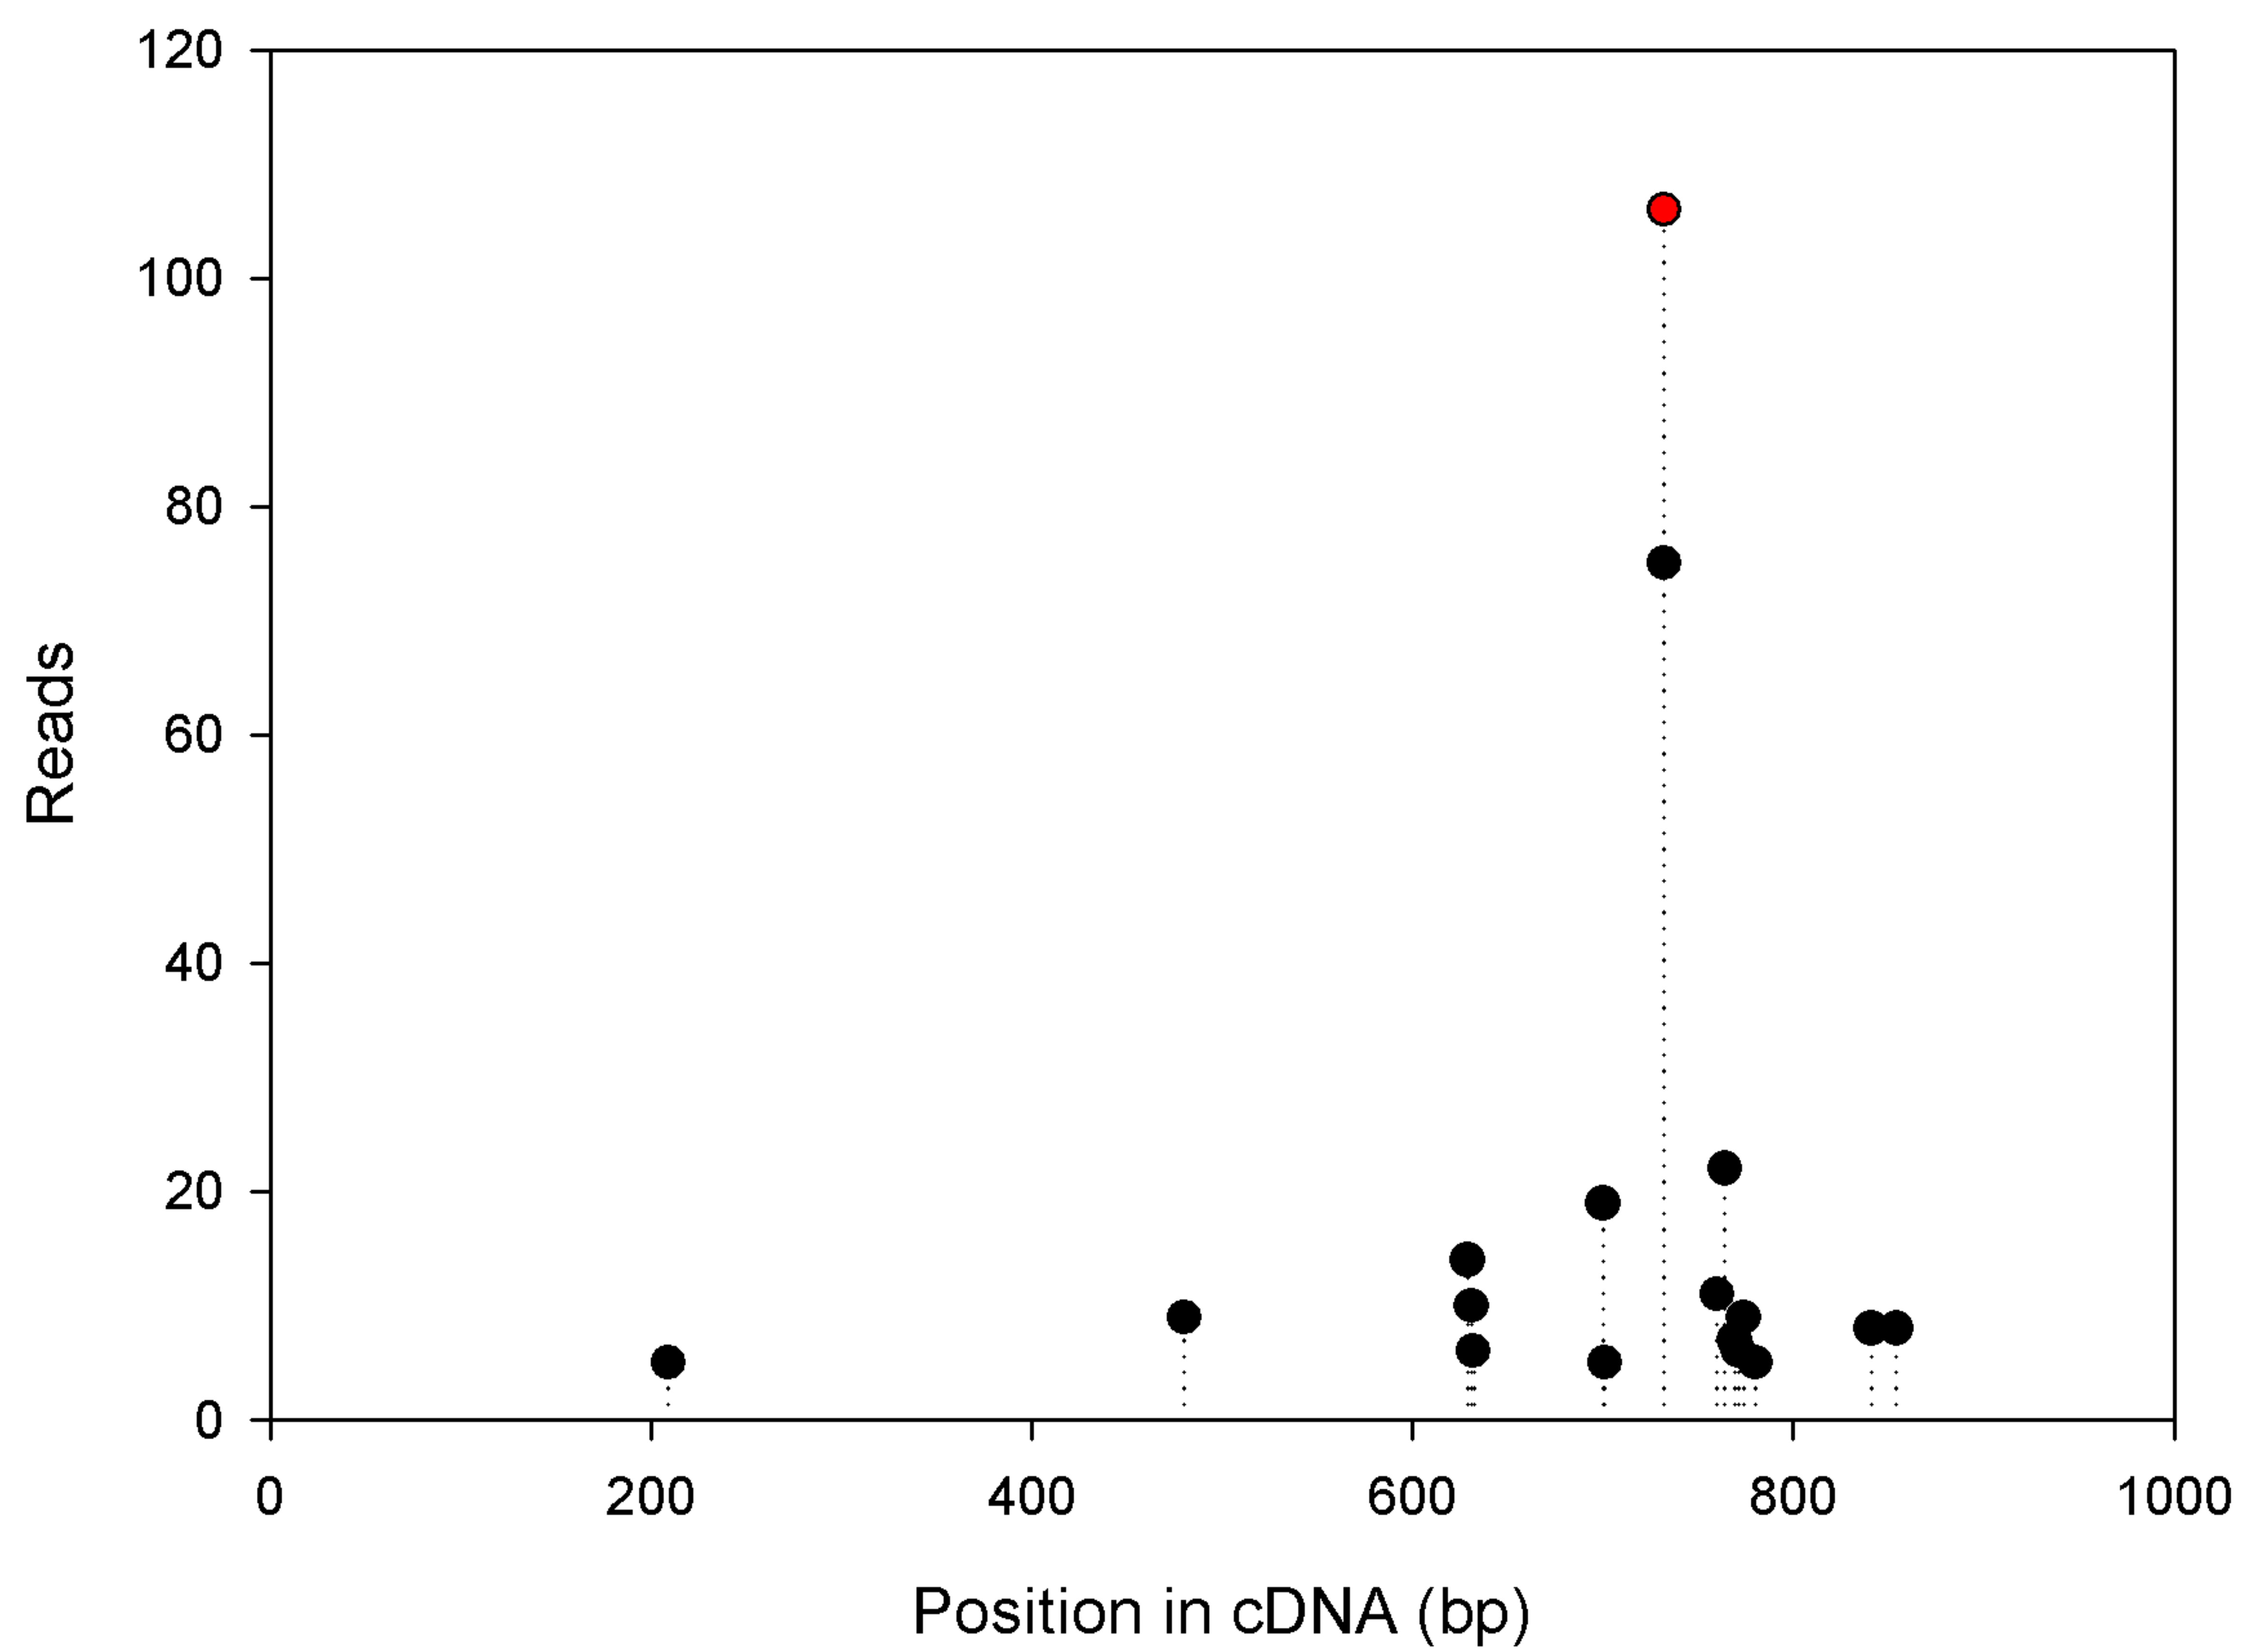

5' CUUGAAUCUUCAGCCU-GUACAGCUUA 3'

Cs3g05730.1

:.:.: :.:.:.:.:.: :.:.:.:

3' -AAUUAAGGAGUUGGAGCAUGU----- 5'

Csi-miR482a-3p-Cs5g18480.1-18

Csi-miR482a-3p-Cs5g18480.1-18, target=Cs3g06120.1 gene=Cs3g06120  
 Category:1  
 Score:5  
 Cleavage site:2364

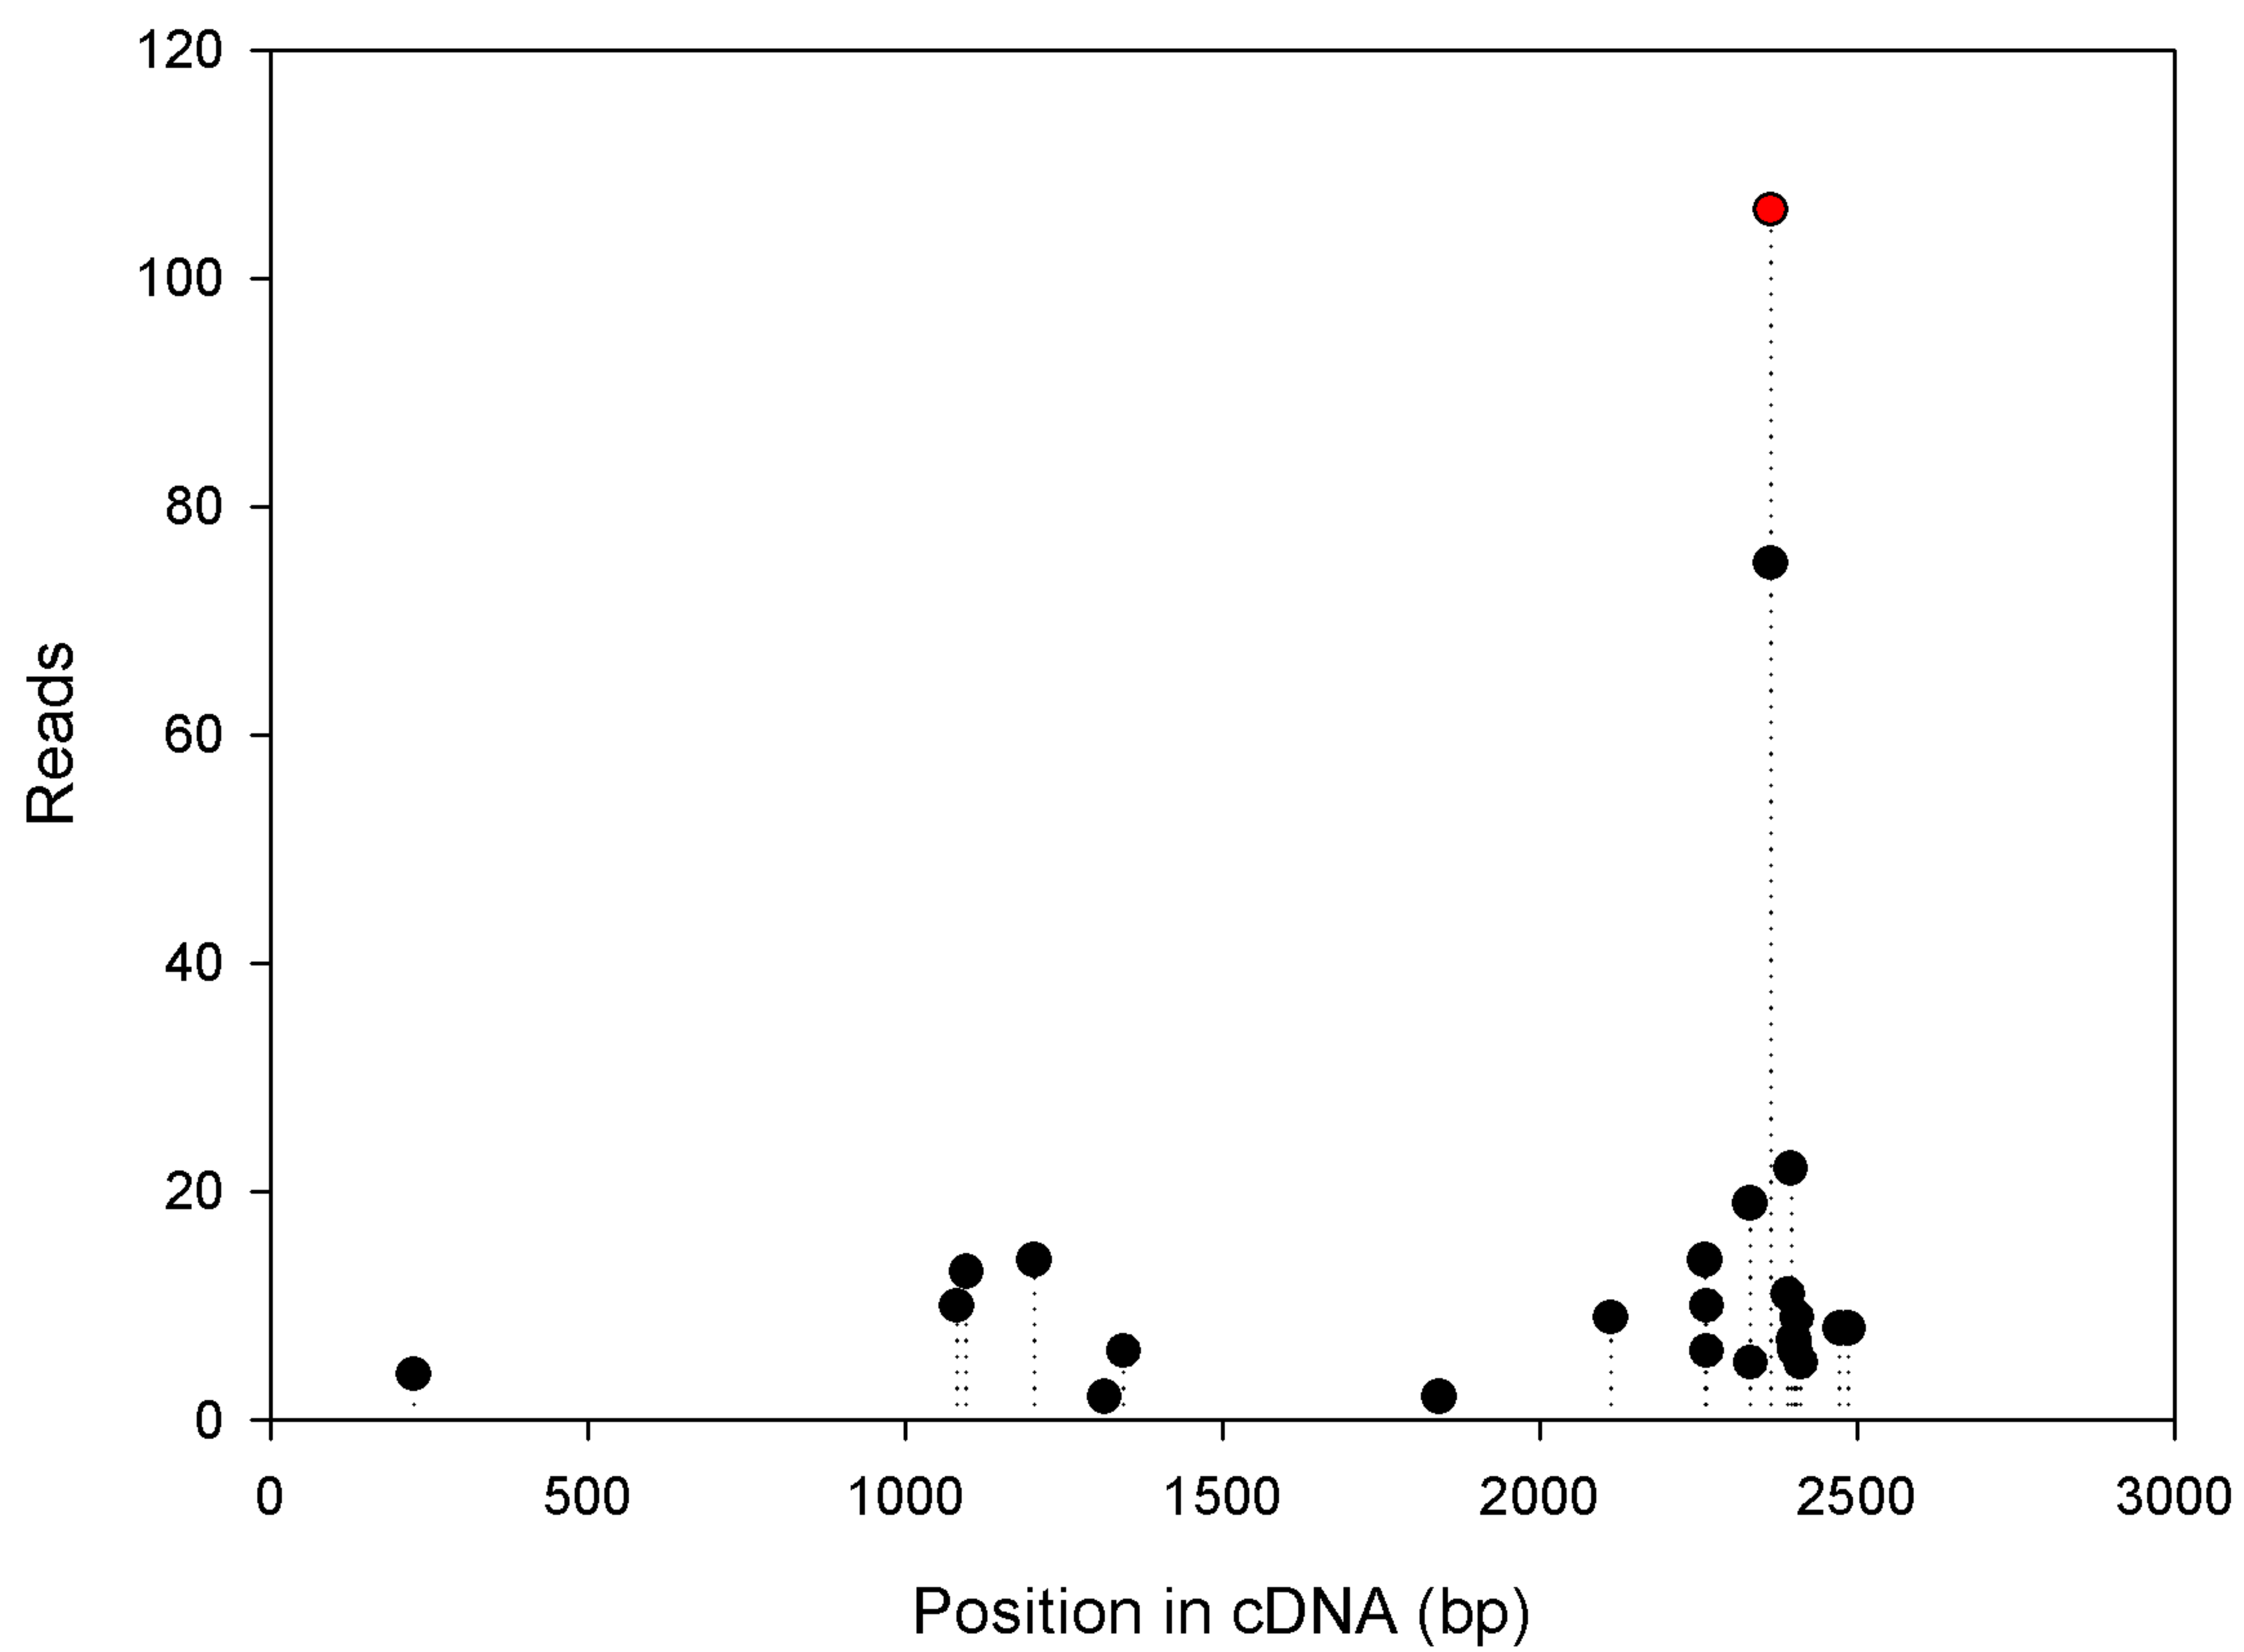

5' CUUGAAUCUUCAGCCU-GUACAGCUUA 3'

Cs3g06120.1

.....

3' -AAUUAAGGAGUUGGAGCAUGU----- 5'

Csi-miR482a-3p-Cs5g18480.1-18

Csi-miR482a-3p-Cs5g18480.1-20, target=Cs9g03090.1 gene=Cs9g03090

Category:3

Score:3.5

Cleavage site:3813

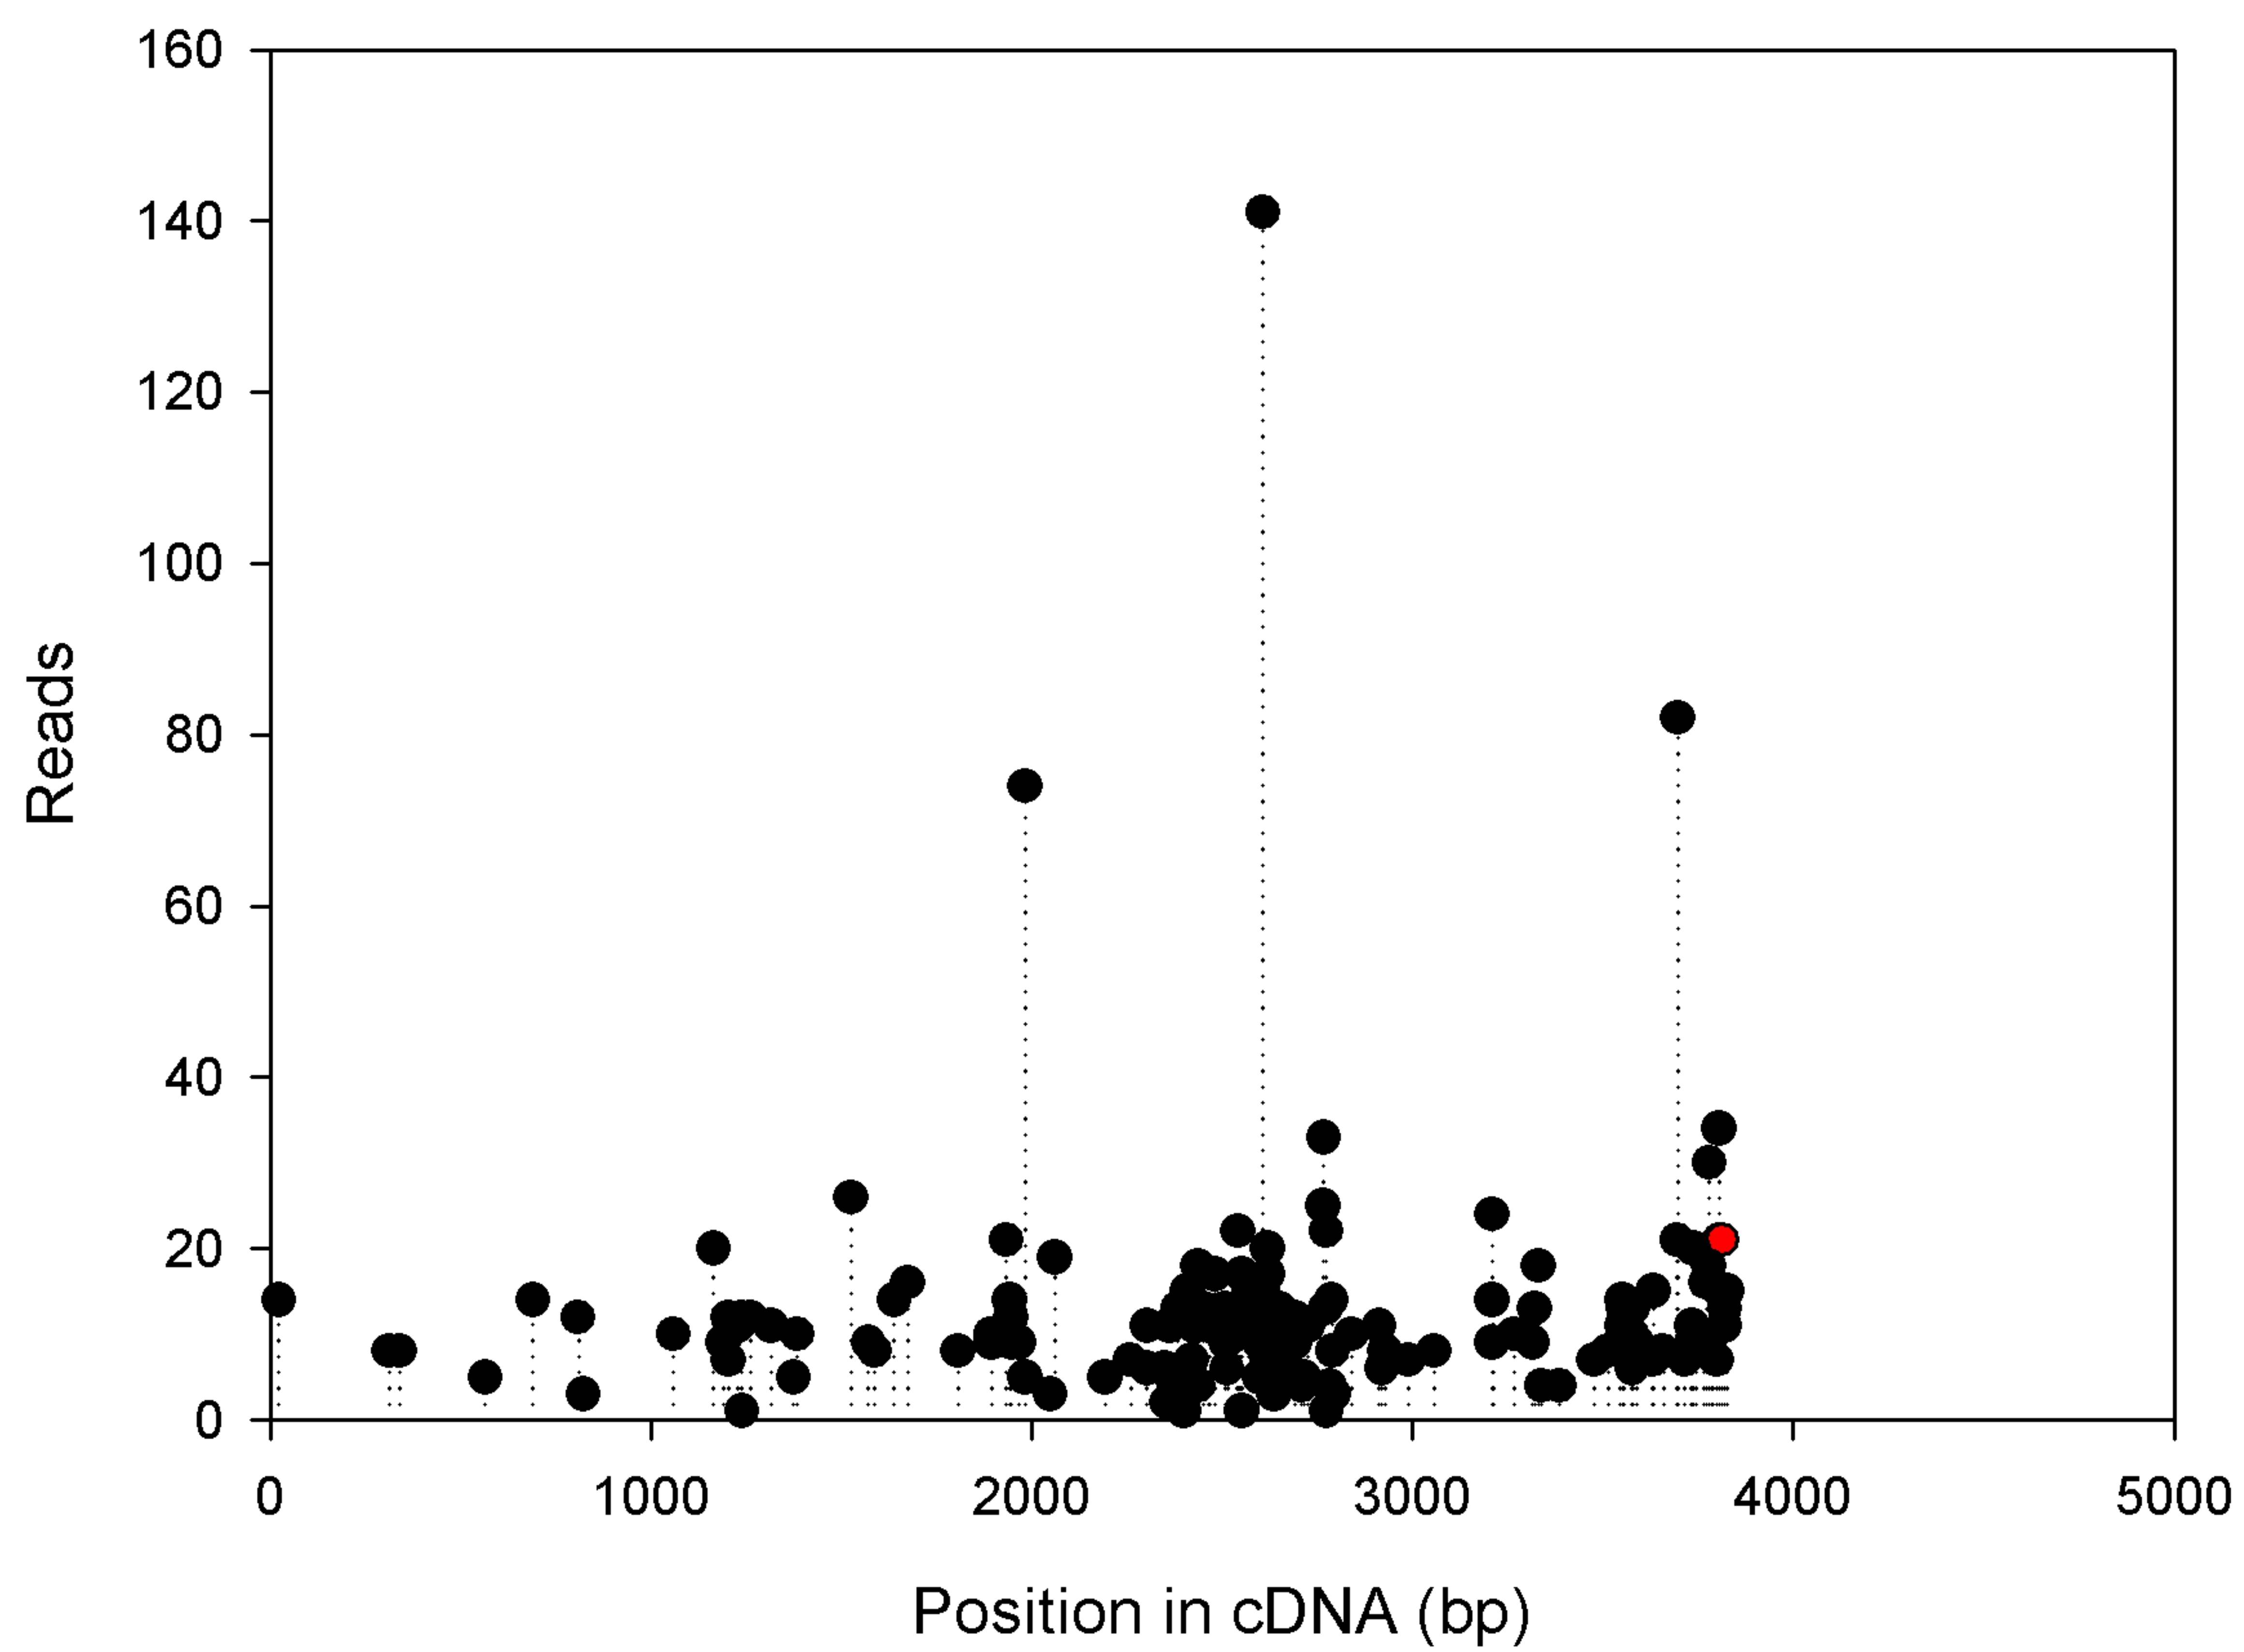

5' UUGUGAUUGUAUUUAAACUGAAUUU 3'

Cs9g03090.1

... ..

3' ---ACUCCGUAAAUUUGACUUUU-- 5'

Csi-miR482a-3p-Cs5g18480.1-20



Csi-miR482a-3p-Cs5g18480.1-77, target=Cs7g19320.2 gene=Cs7g19320  
 Category:3  
 Score:4.5  
 Cleavage site:2948

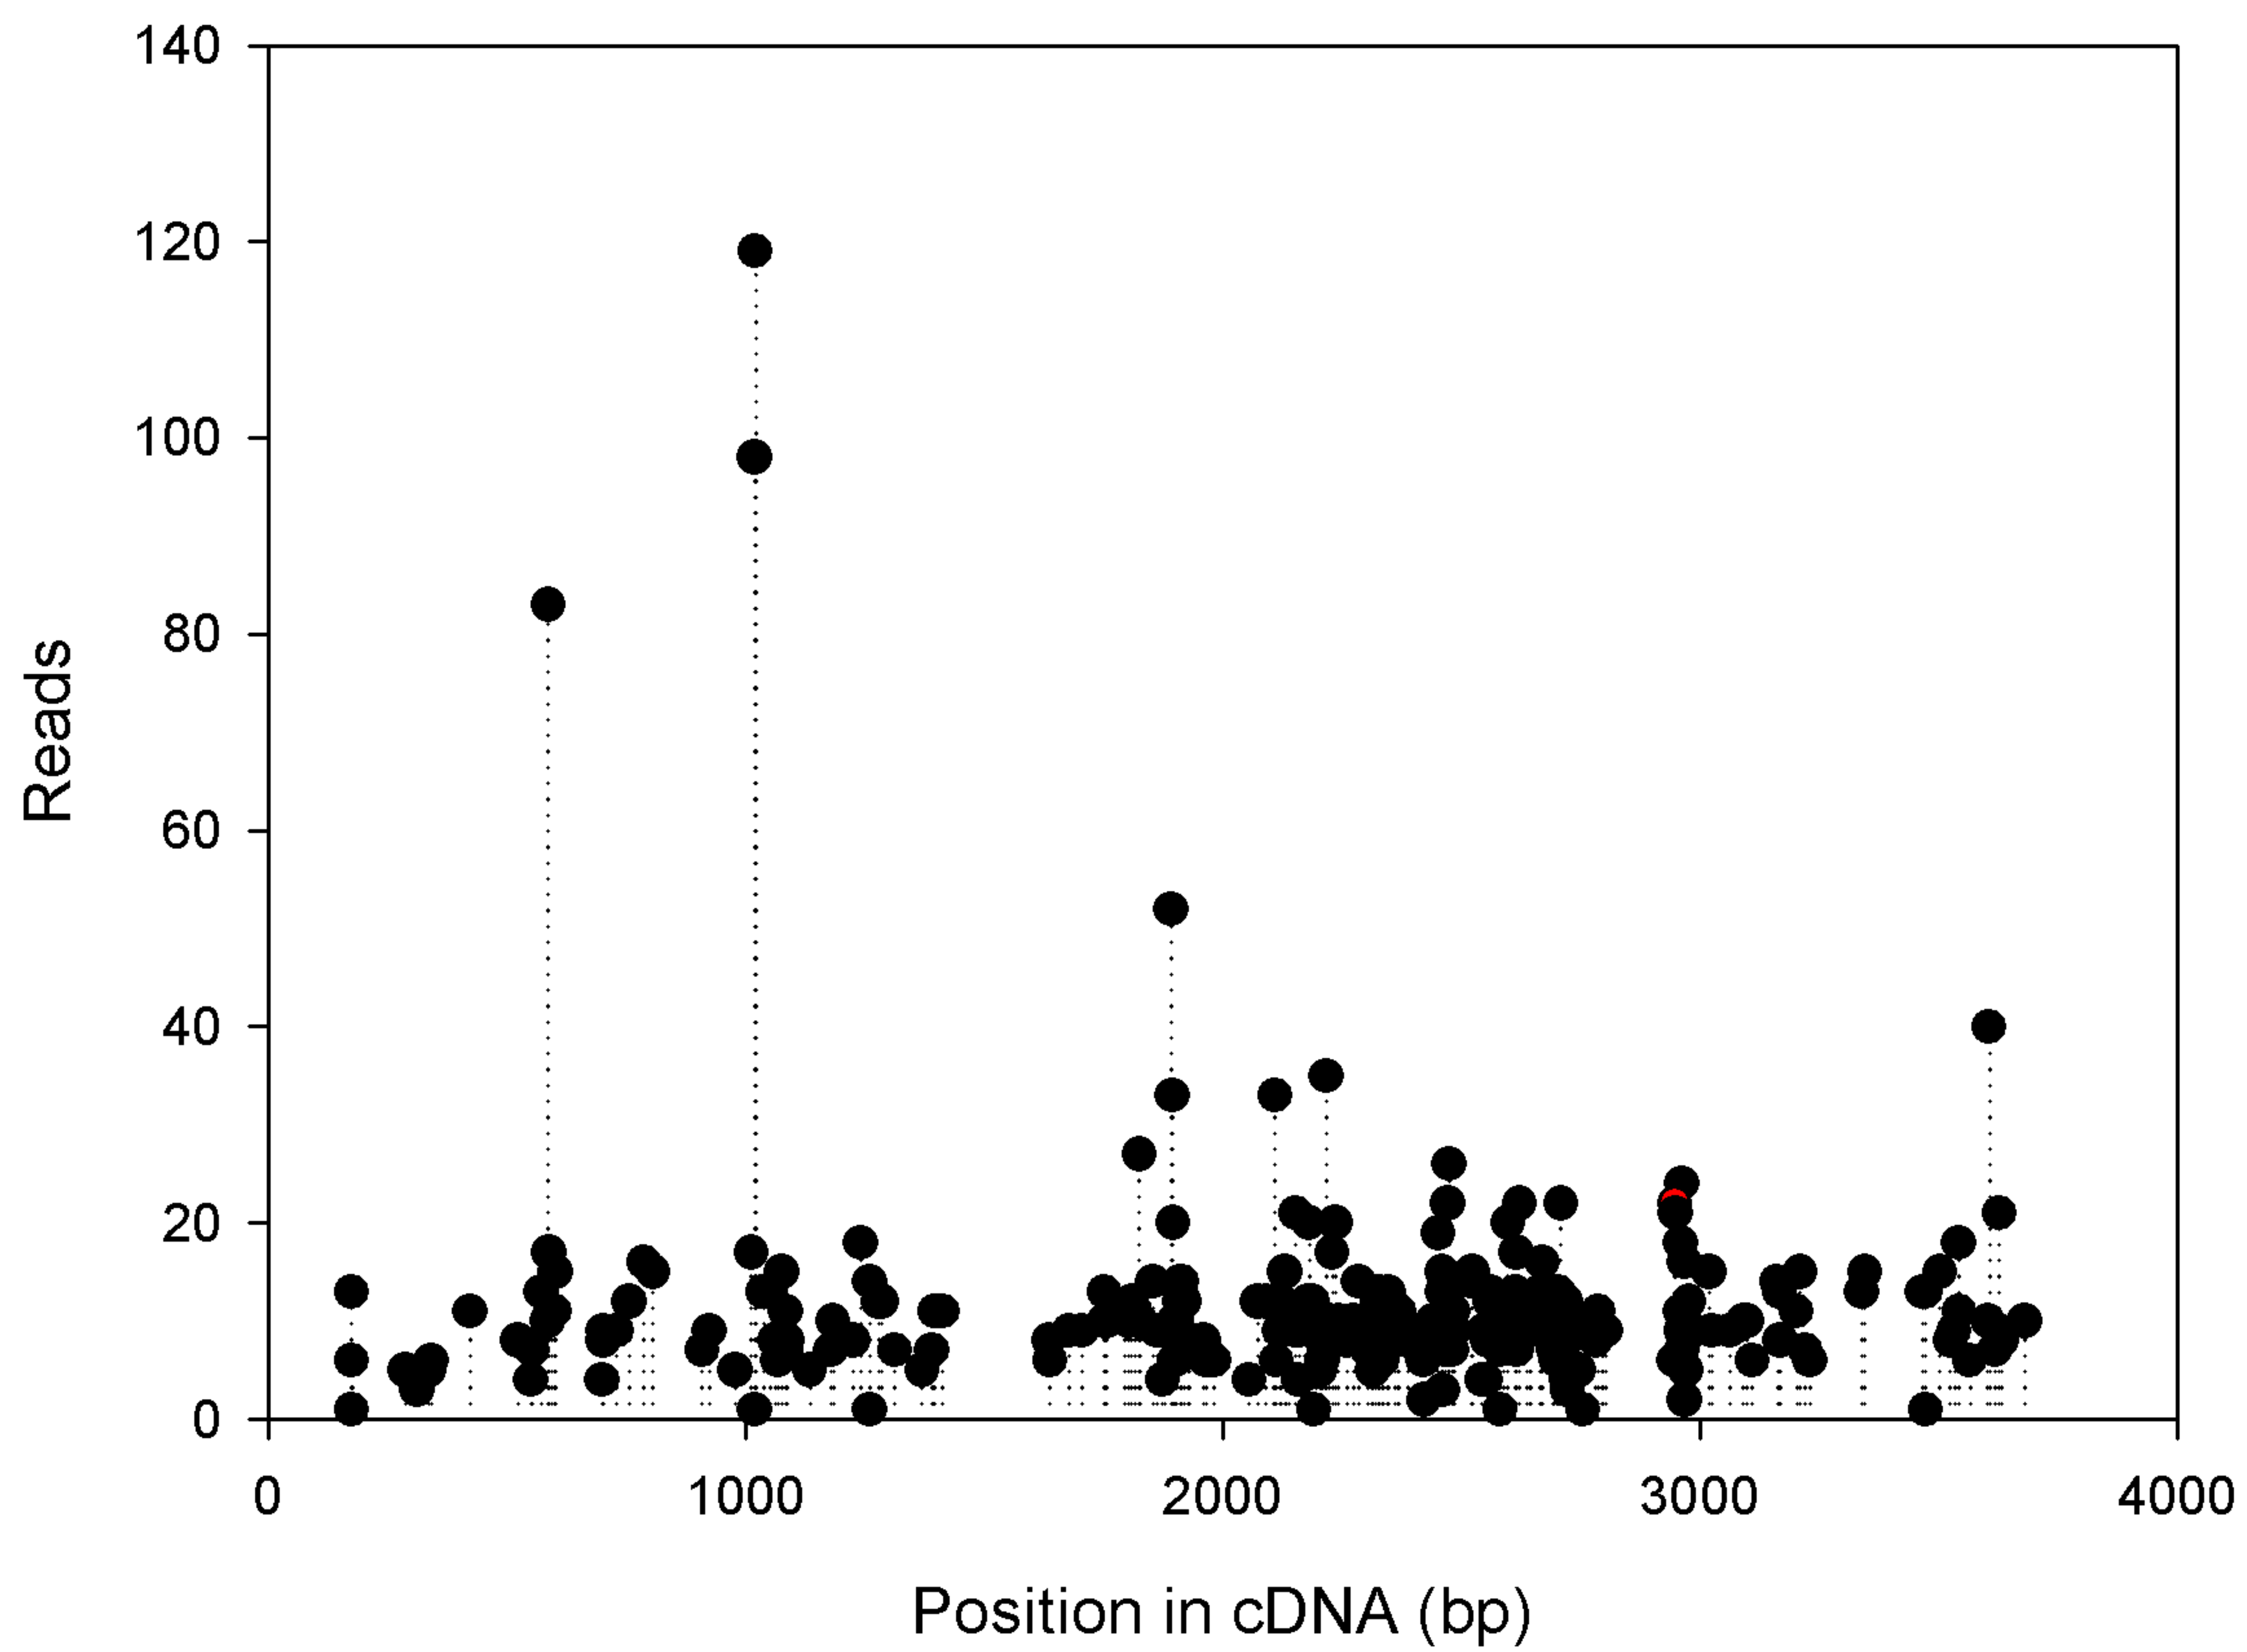

5' AAAUGCAGGUGUUUUCUAUUGCGGGG 3'

Cs7g19320.2

... ..

3' --UACCGUCA-AGAAGAUACGCC-- 5'

Csi-miR482a-3p-Cs5g18480.1-77

Csi-miR482a-3p-Cs5g19920.1-36, target=Cs4g03050.1 gene=Cs4g03050  
Category:3  
Score:4  
Cleavage site:1059

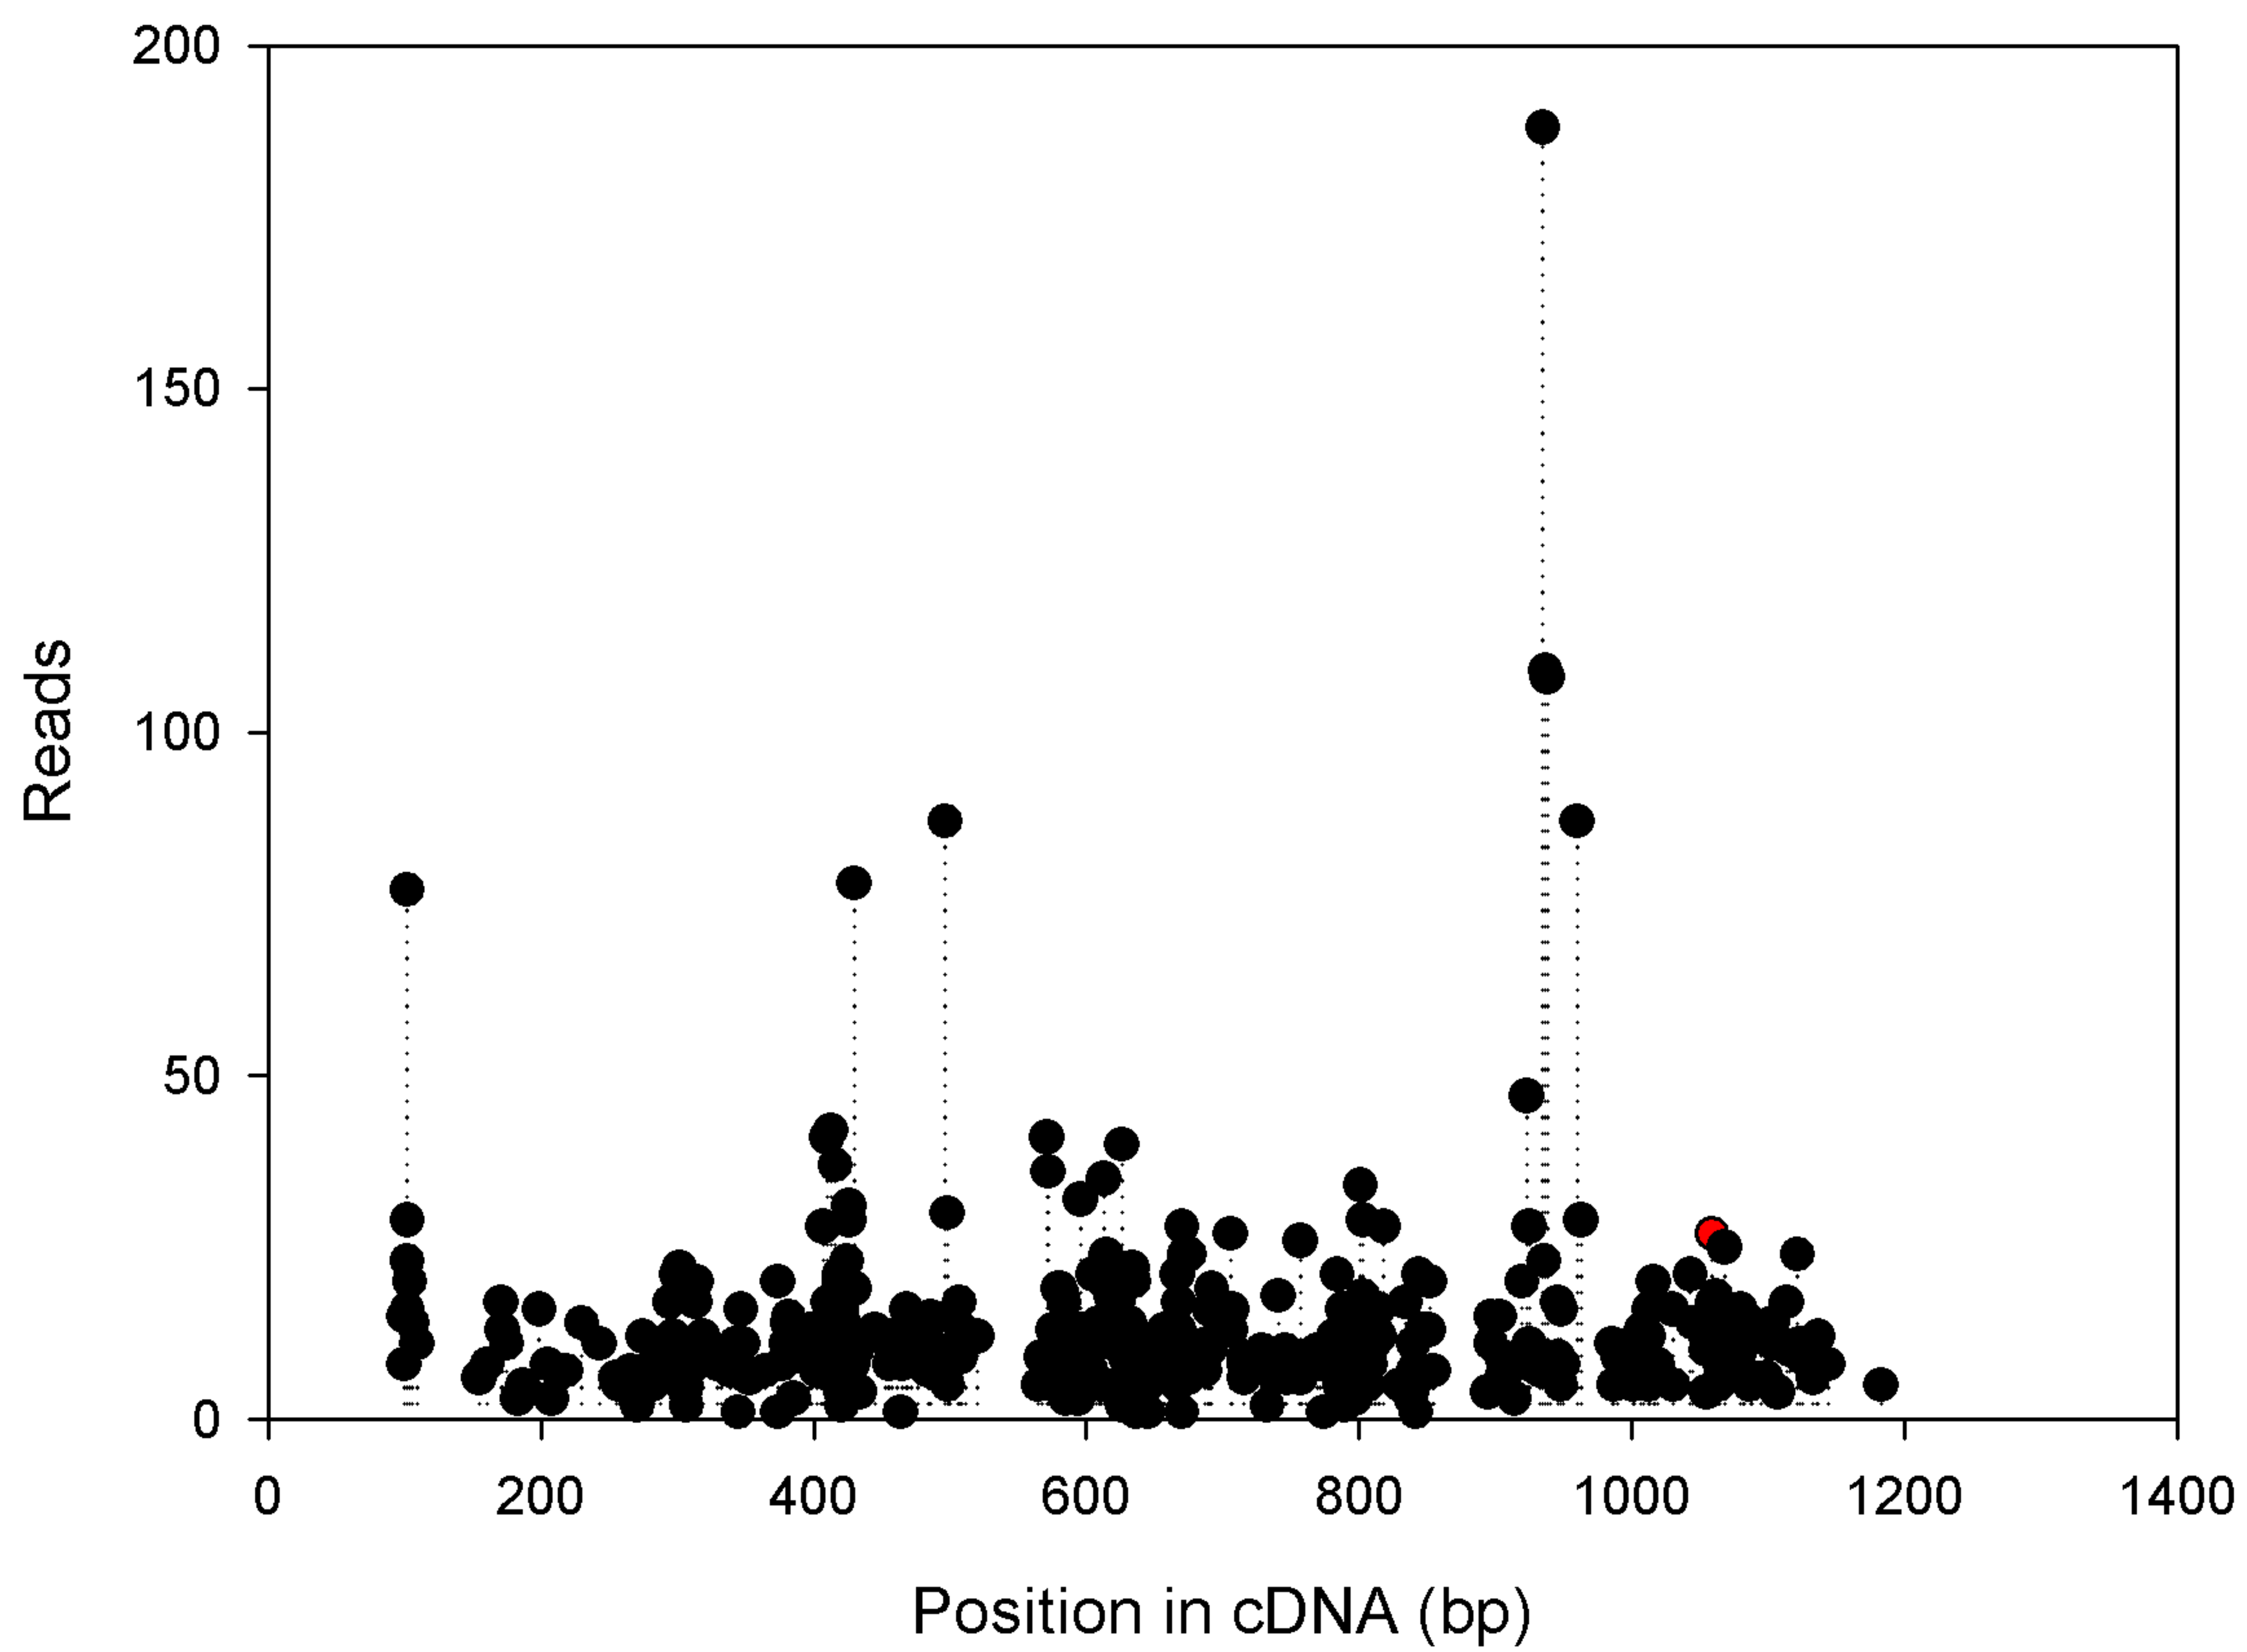

```
5' AAAAUAAUCAACAAGA-CACUUA AAAA 3'  
  : : : : : : : : : : : : : : : :  
3' --UGAAUAGUUGUUCUAGUGAAU---- 5'
```

Cs4g03050.1

Csi-miR482a-3p-Cs5g19920.1-36

Csi-miR482a-3p-Cs5g19920.1-36, target=Cs4g03140.1 gene=Cs4g03140

Category:3

Score:4

Cleavage site:949

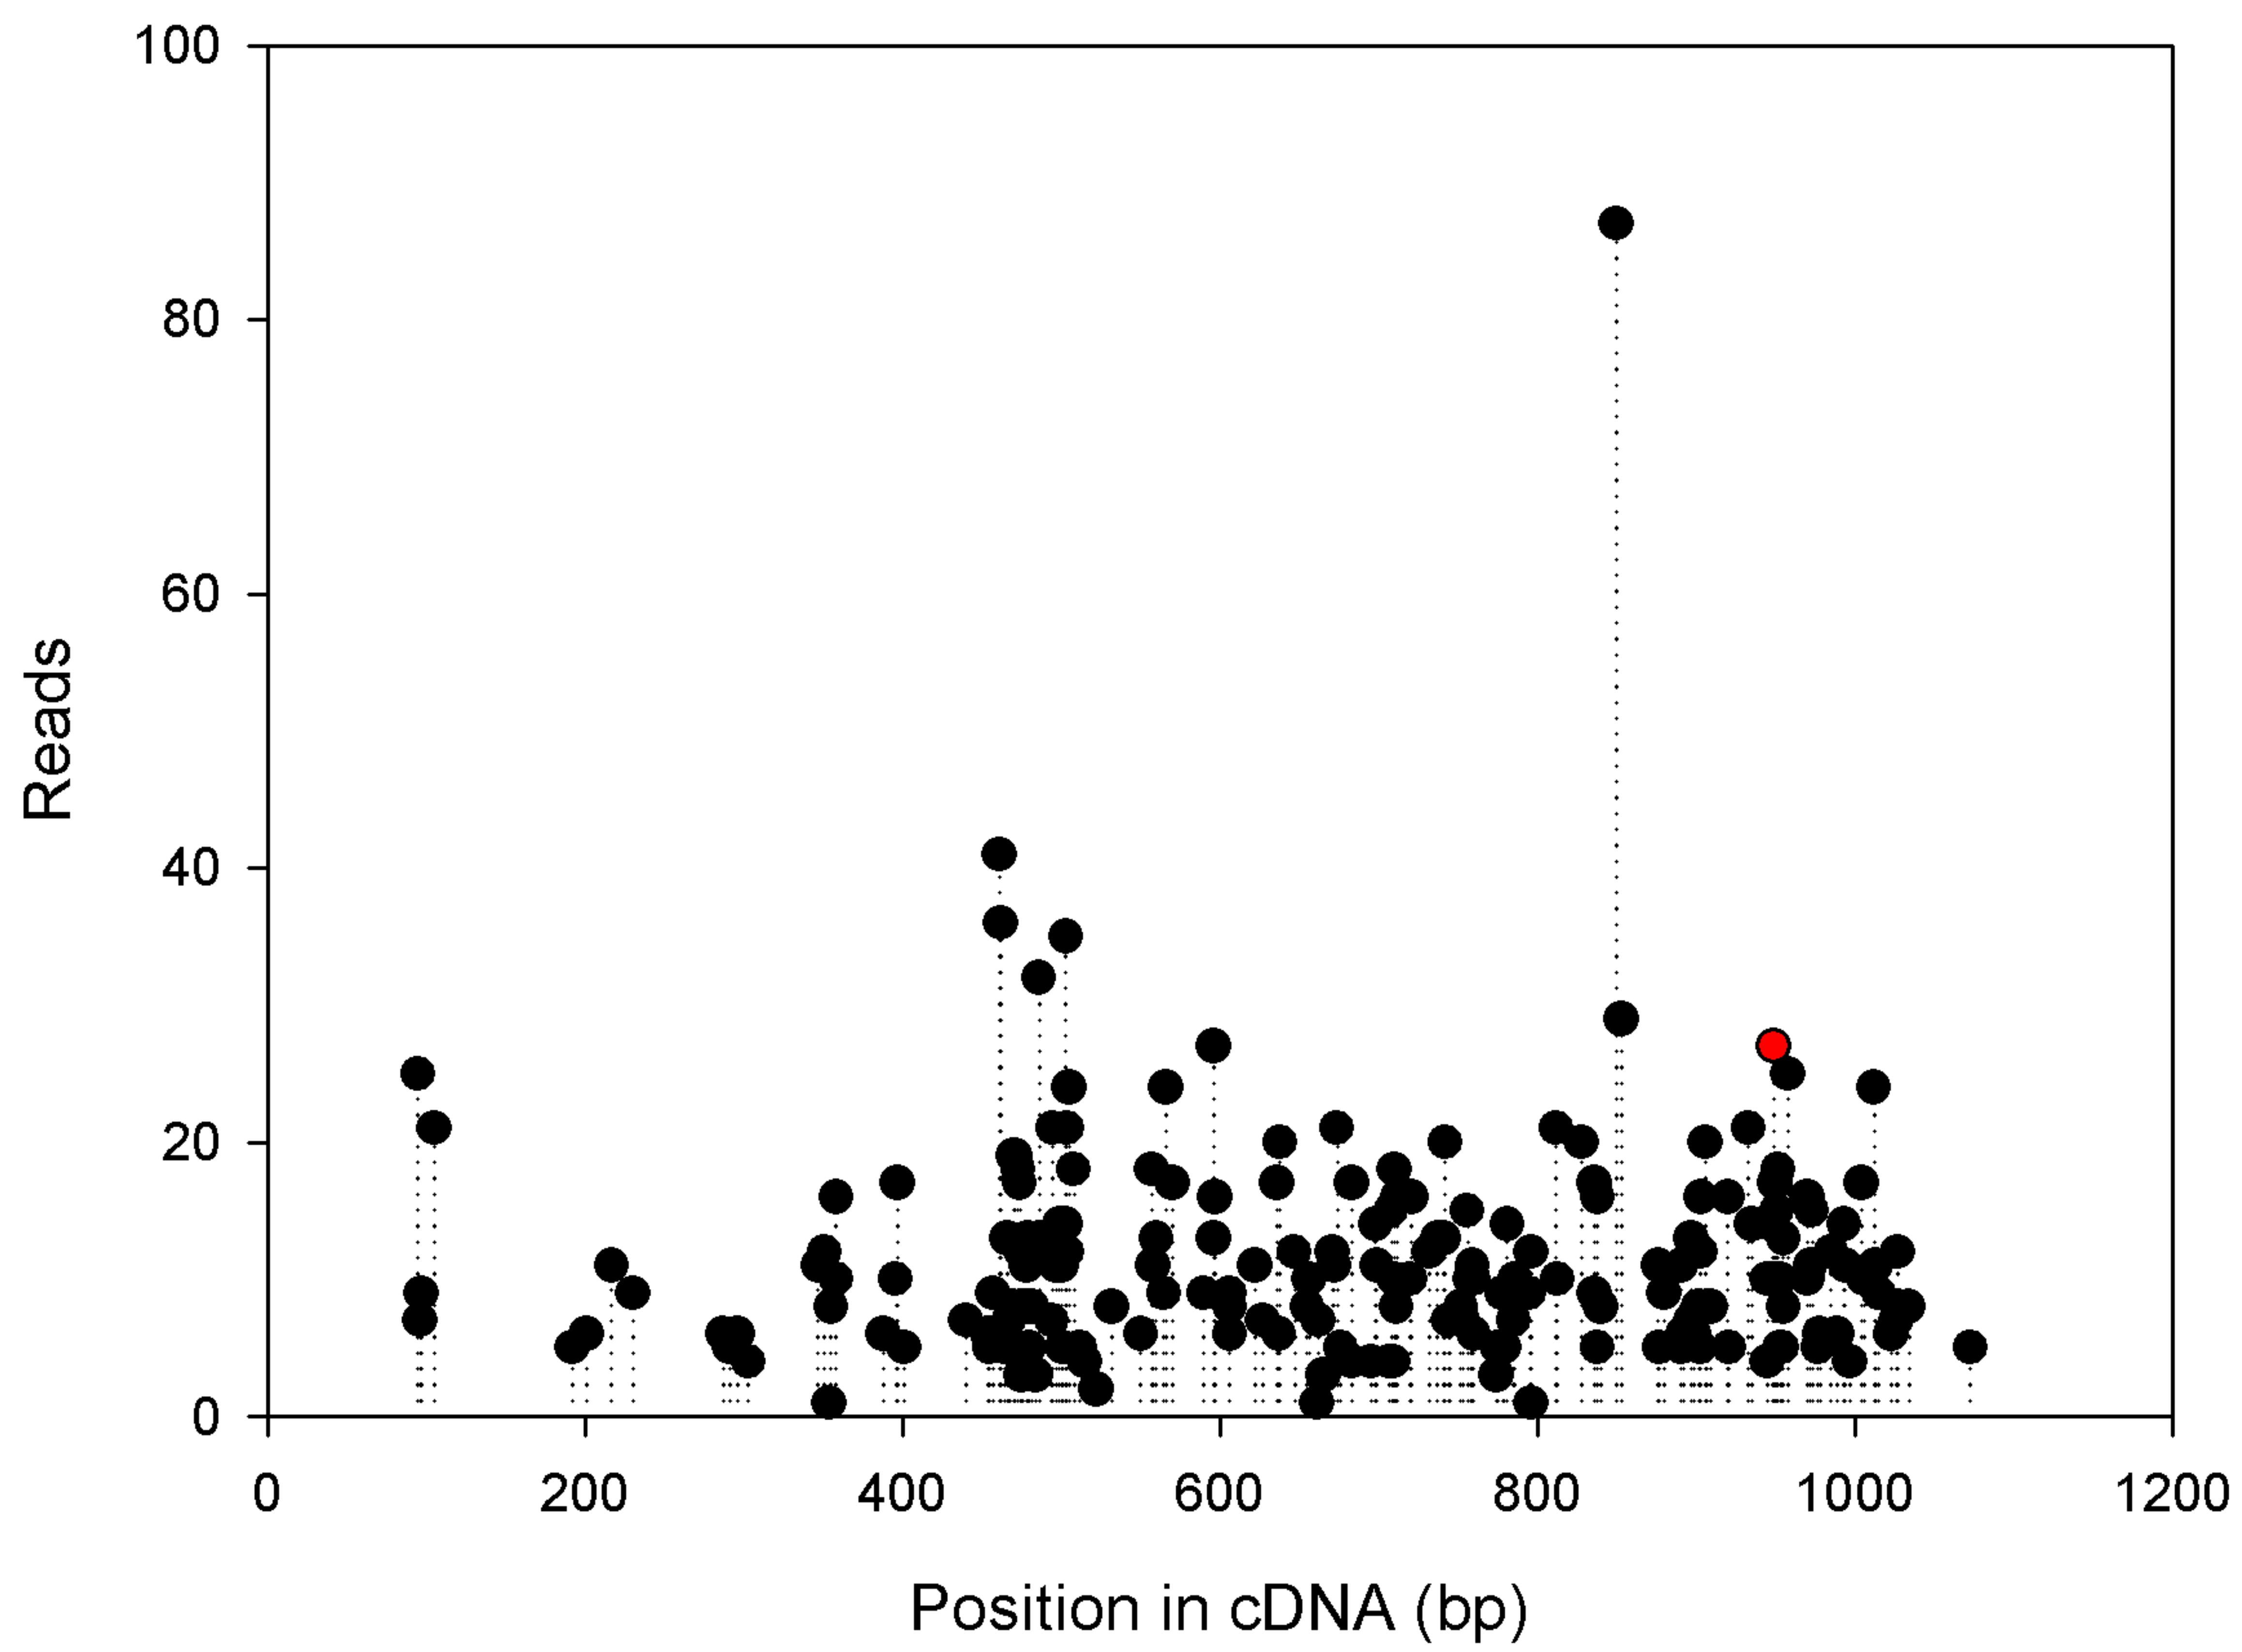

5' AAAAUAAUCAACAAGA-CACUAAAAAAAA 3'

: : : : : : : : : : : : : : : : : : : : : : : : : : : : :

3' --UGAAUAGUUGUUCUAGUGAAU---- 5'

Cs4g03140.1

Csi-miR482a-3p-Cs5g19920.1-36





Csi-miR482c-Cs9g06846.1-15, target=Cs1g16450.1 gene=Cs1g16450

Category:2

Score:5

Cleavage site:1954

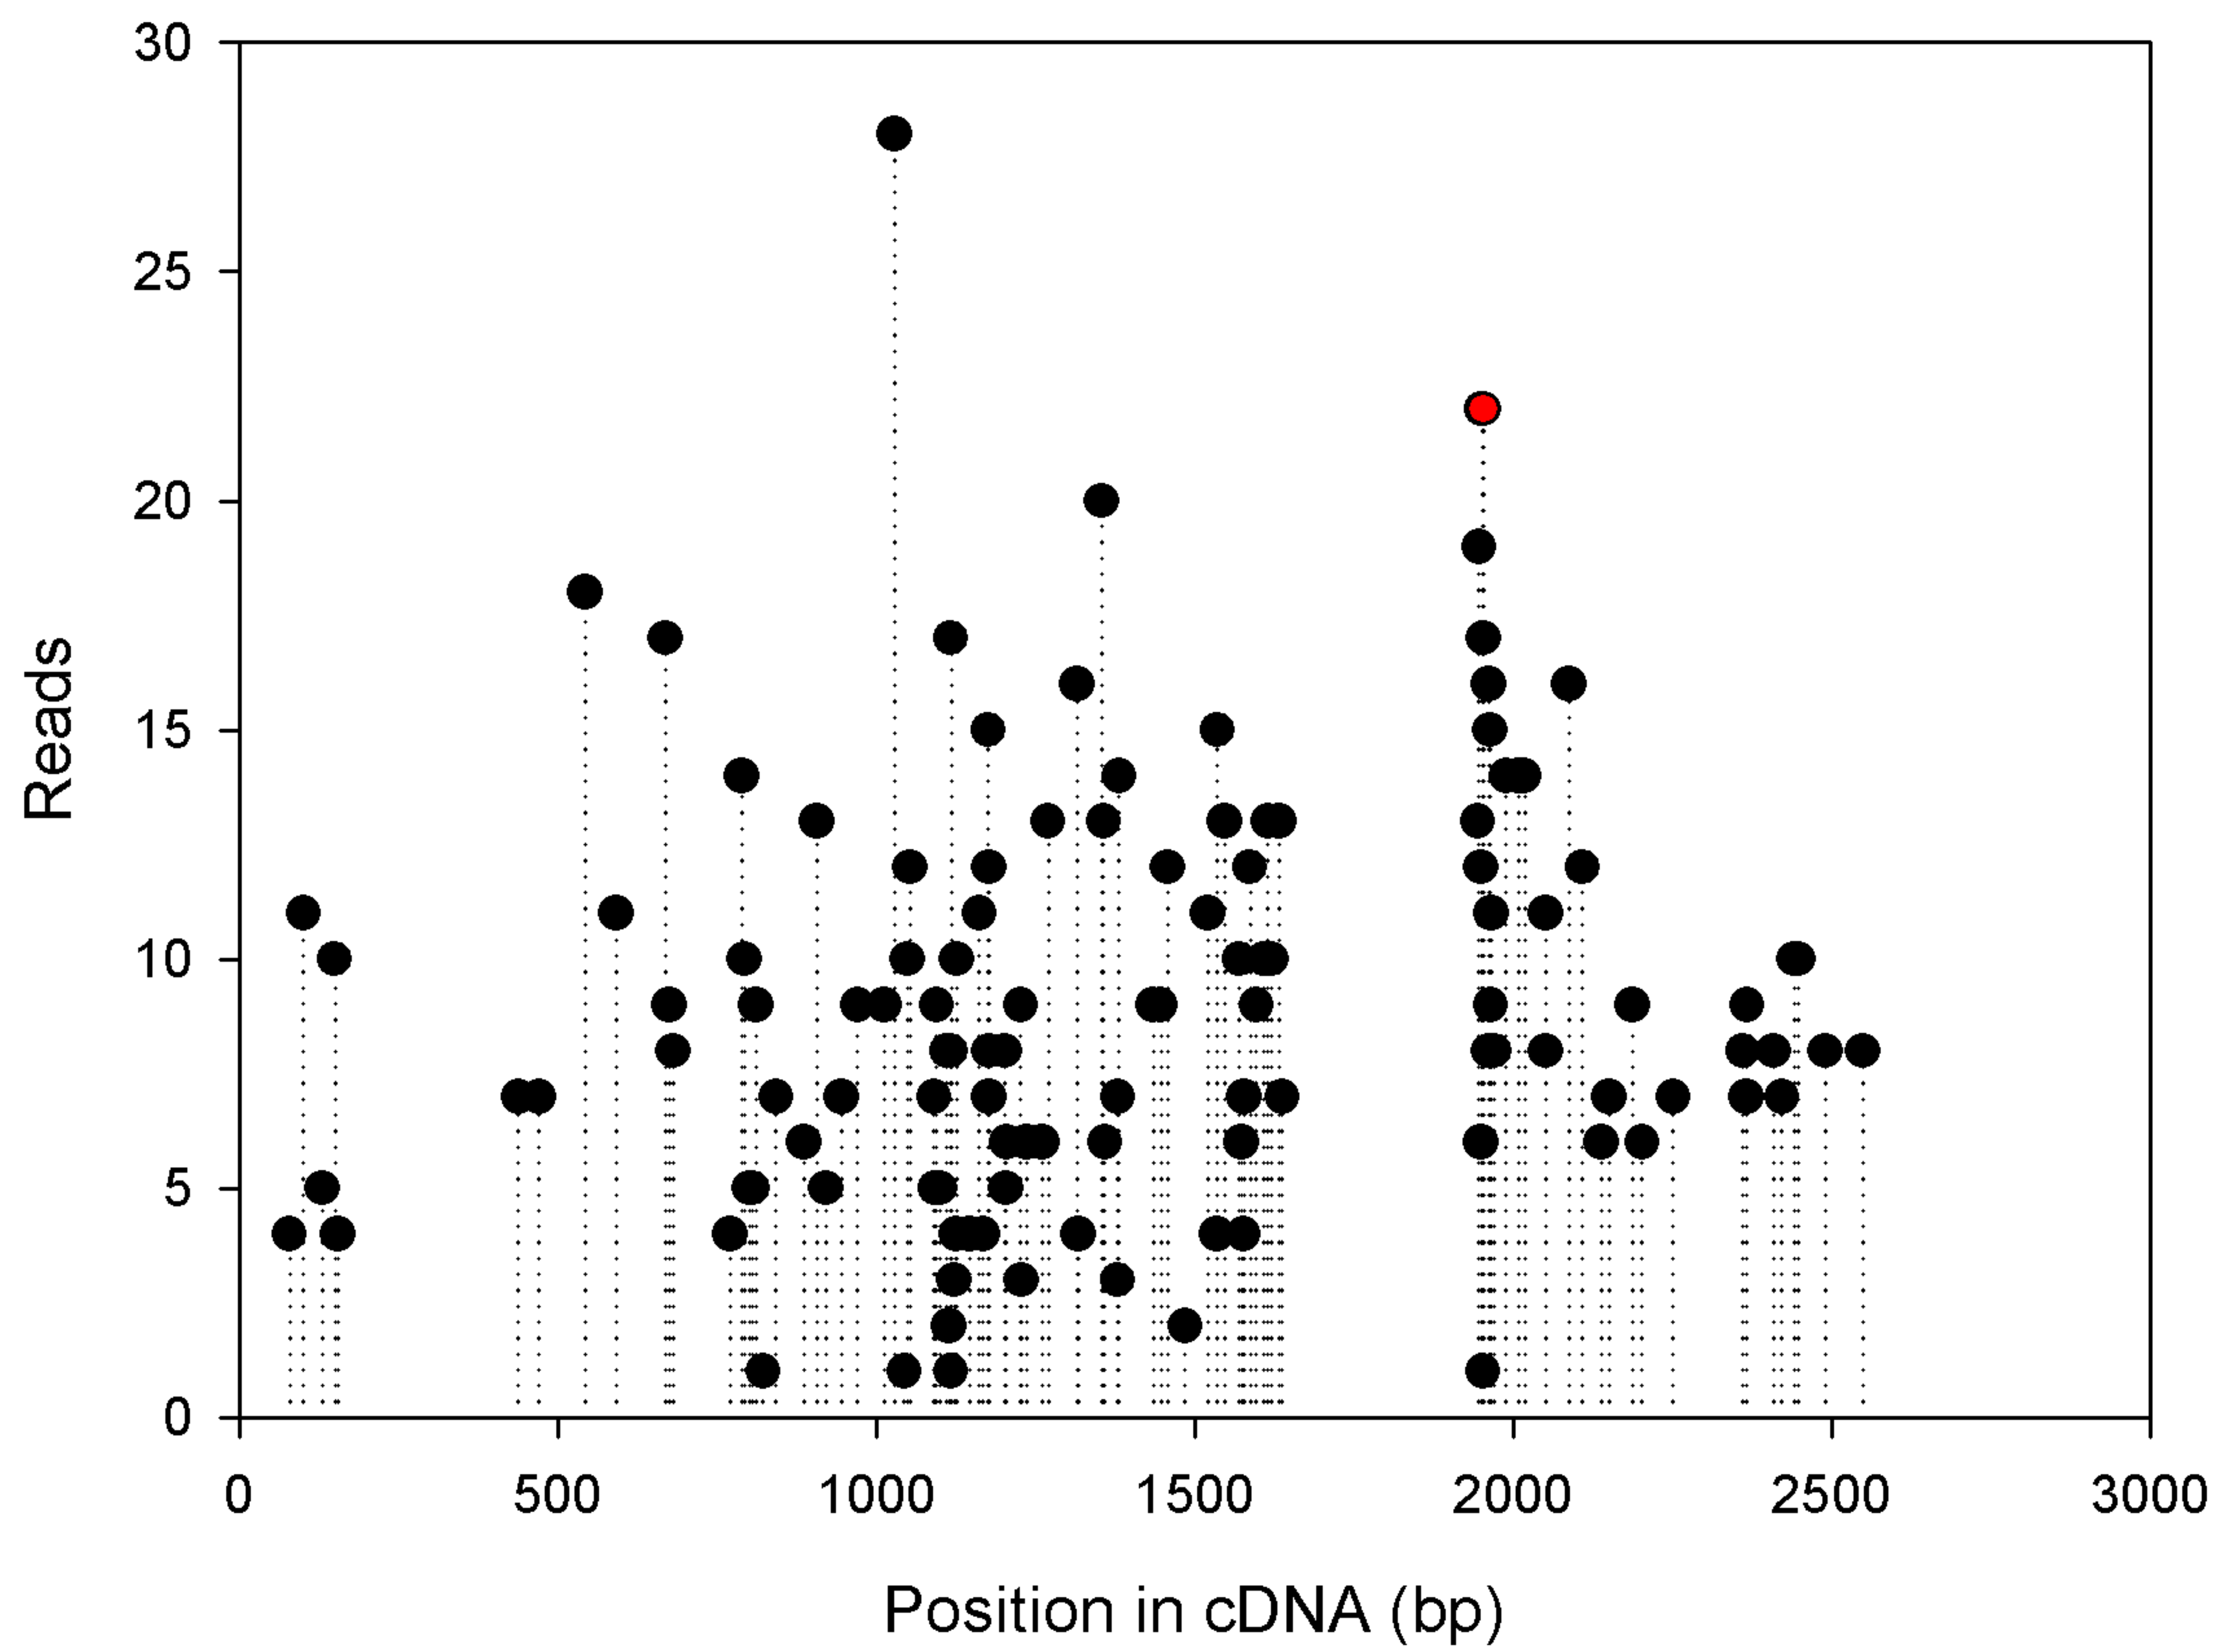

5' UACAAUGG-UAUCAUAUUAUGGCACAG 3'

Cs1g16450.1

::: :::: ::::::::::: ::

3' AUGGUACCUAUAGUAUAAGAC----- 5'

Csi-miR482c-Cs9g06846.1-15

Csi-miR482c-Cs9g06846.1-22, target=Cs5g19660.1 gene=Cs5g19660  
 Category:3  
 Score:5  
 Cleavage site:1665

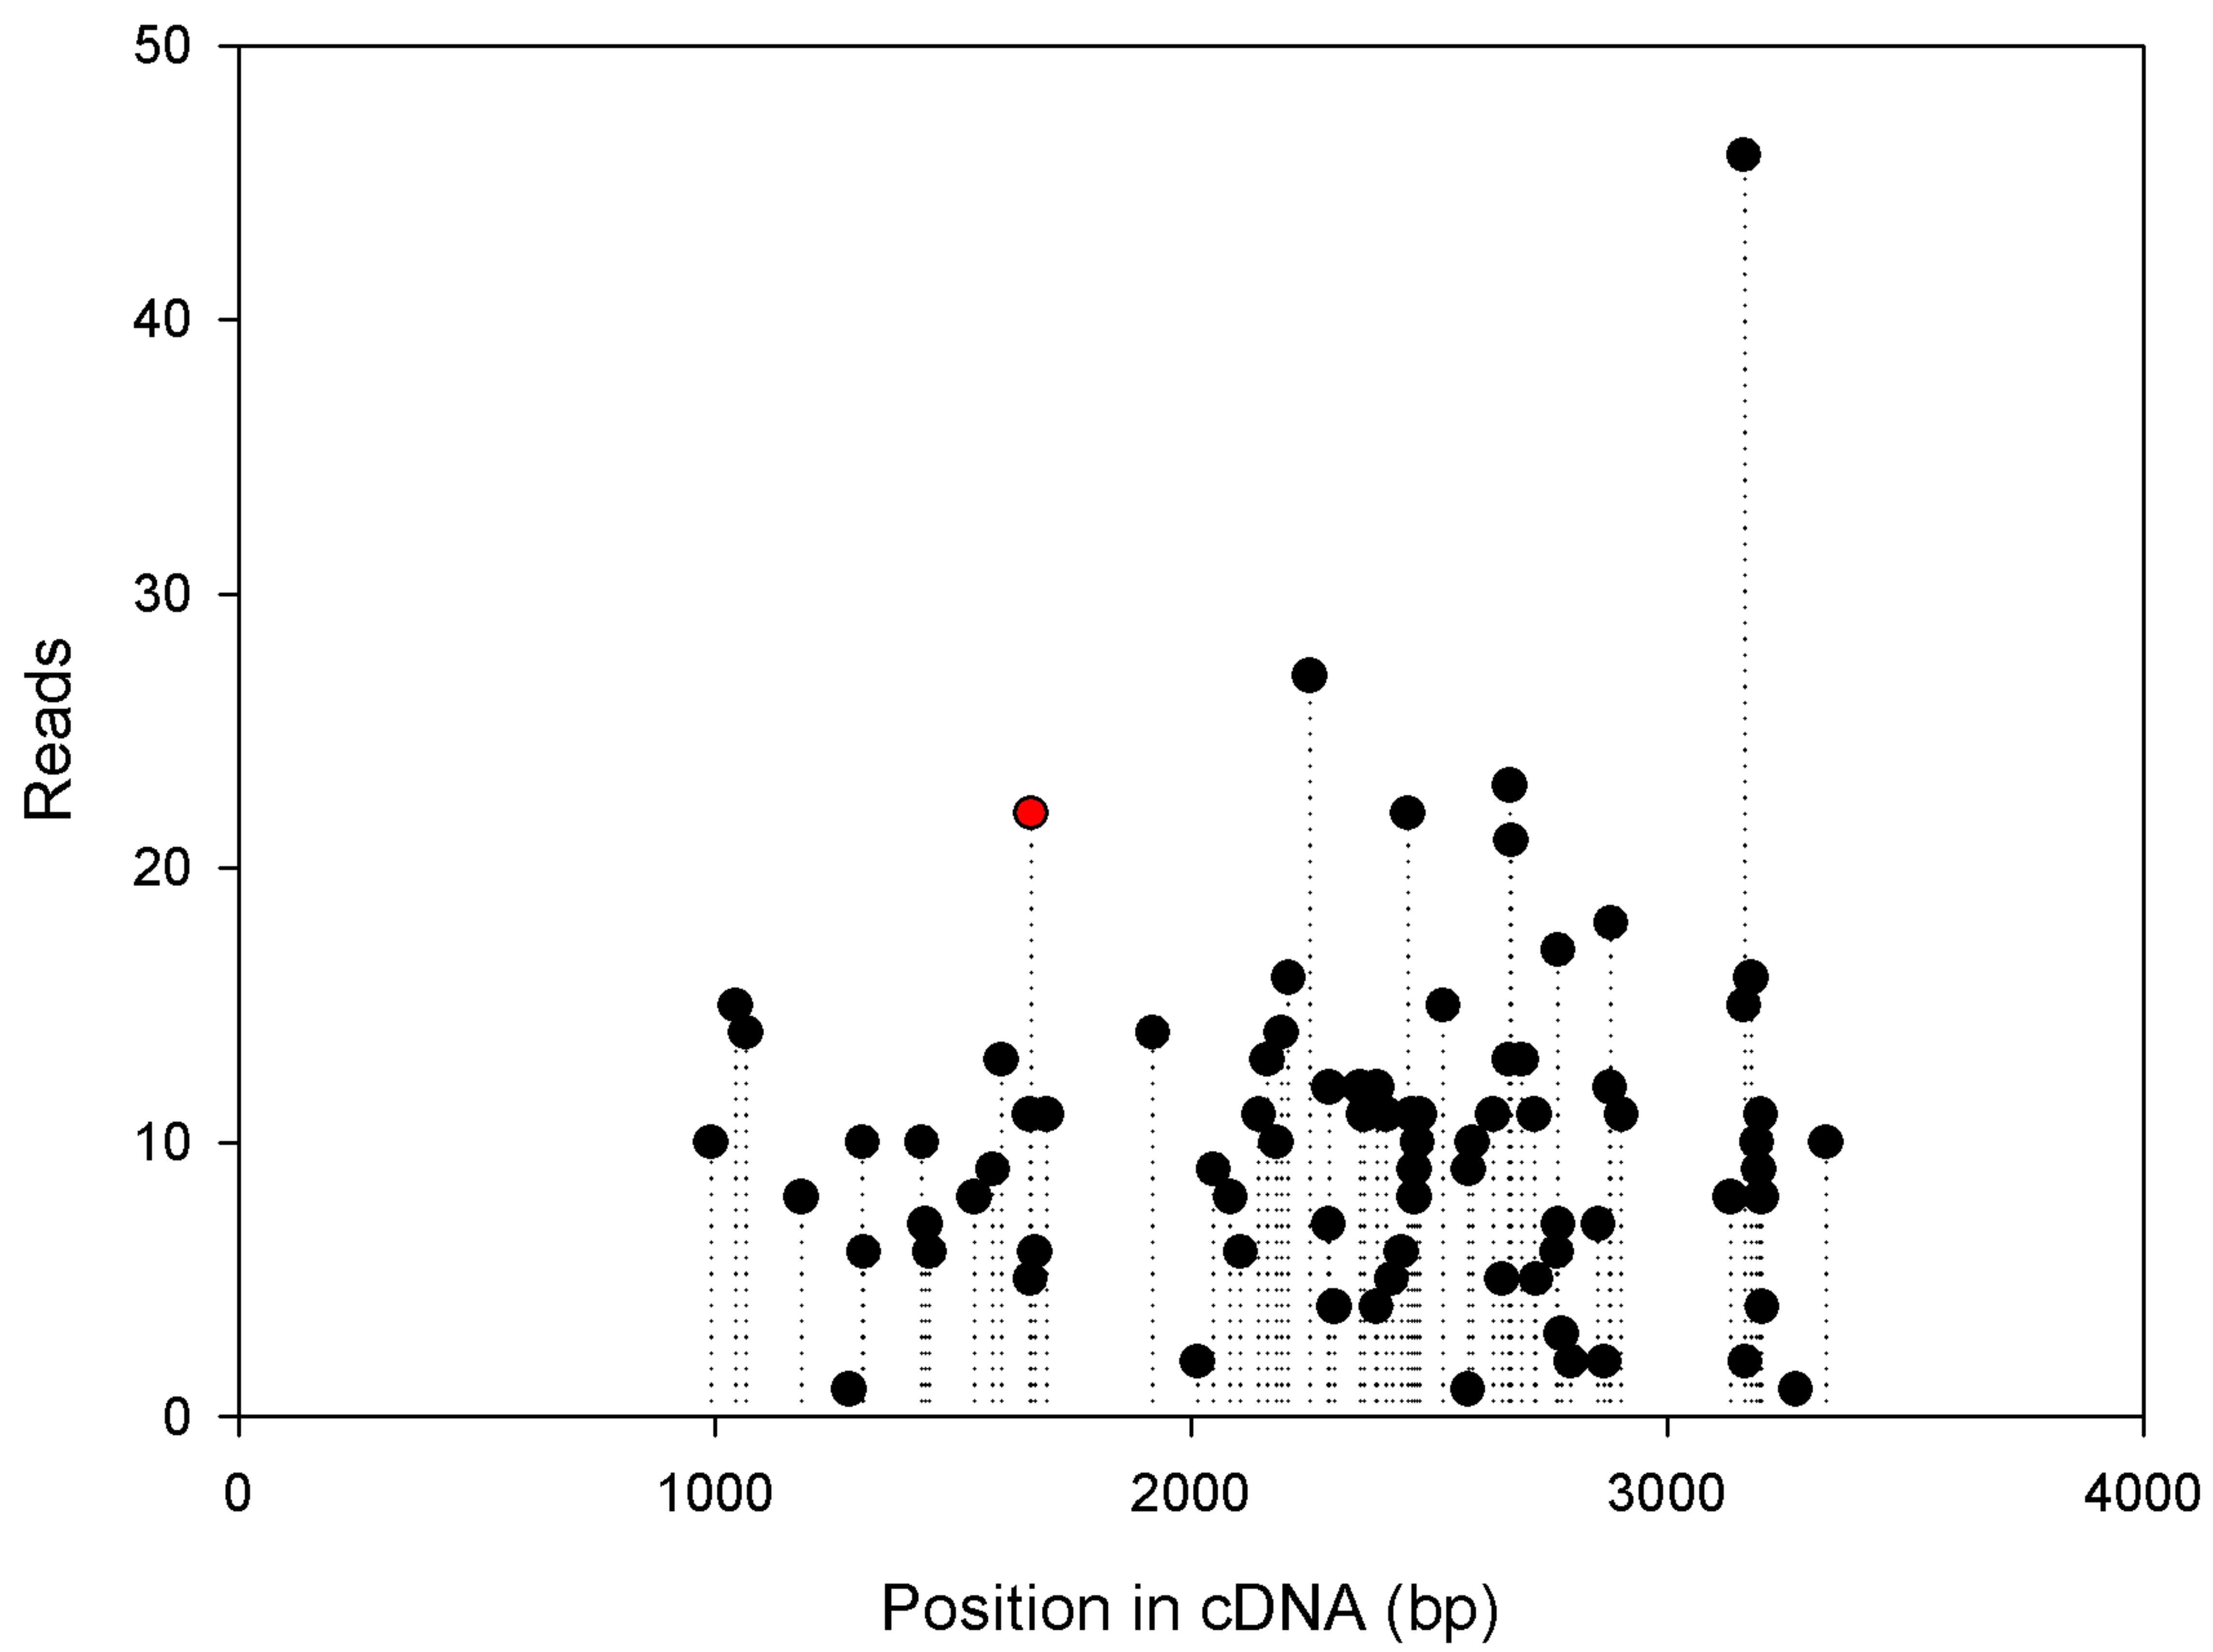

5' AGCUUUAU-UAUCUCA AUGCUGGAGGA 3'  
 ::::: ::::: ::  
 3' -CGGGAUAGAUAGAGUUAGGAA----- 5'

Cs5g19660.1

Csi-miR482c-Cs9g06846.1-22

Csi-miR482c-Cs9g06846.1-5, target=Cs9g08050.1 gene=Cs9g08050

Category:3

Score:5

Cleavage site:1748

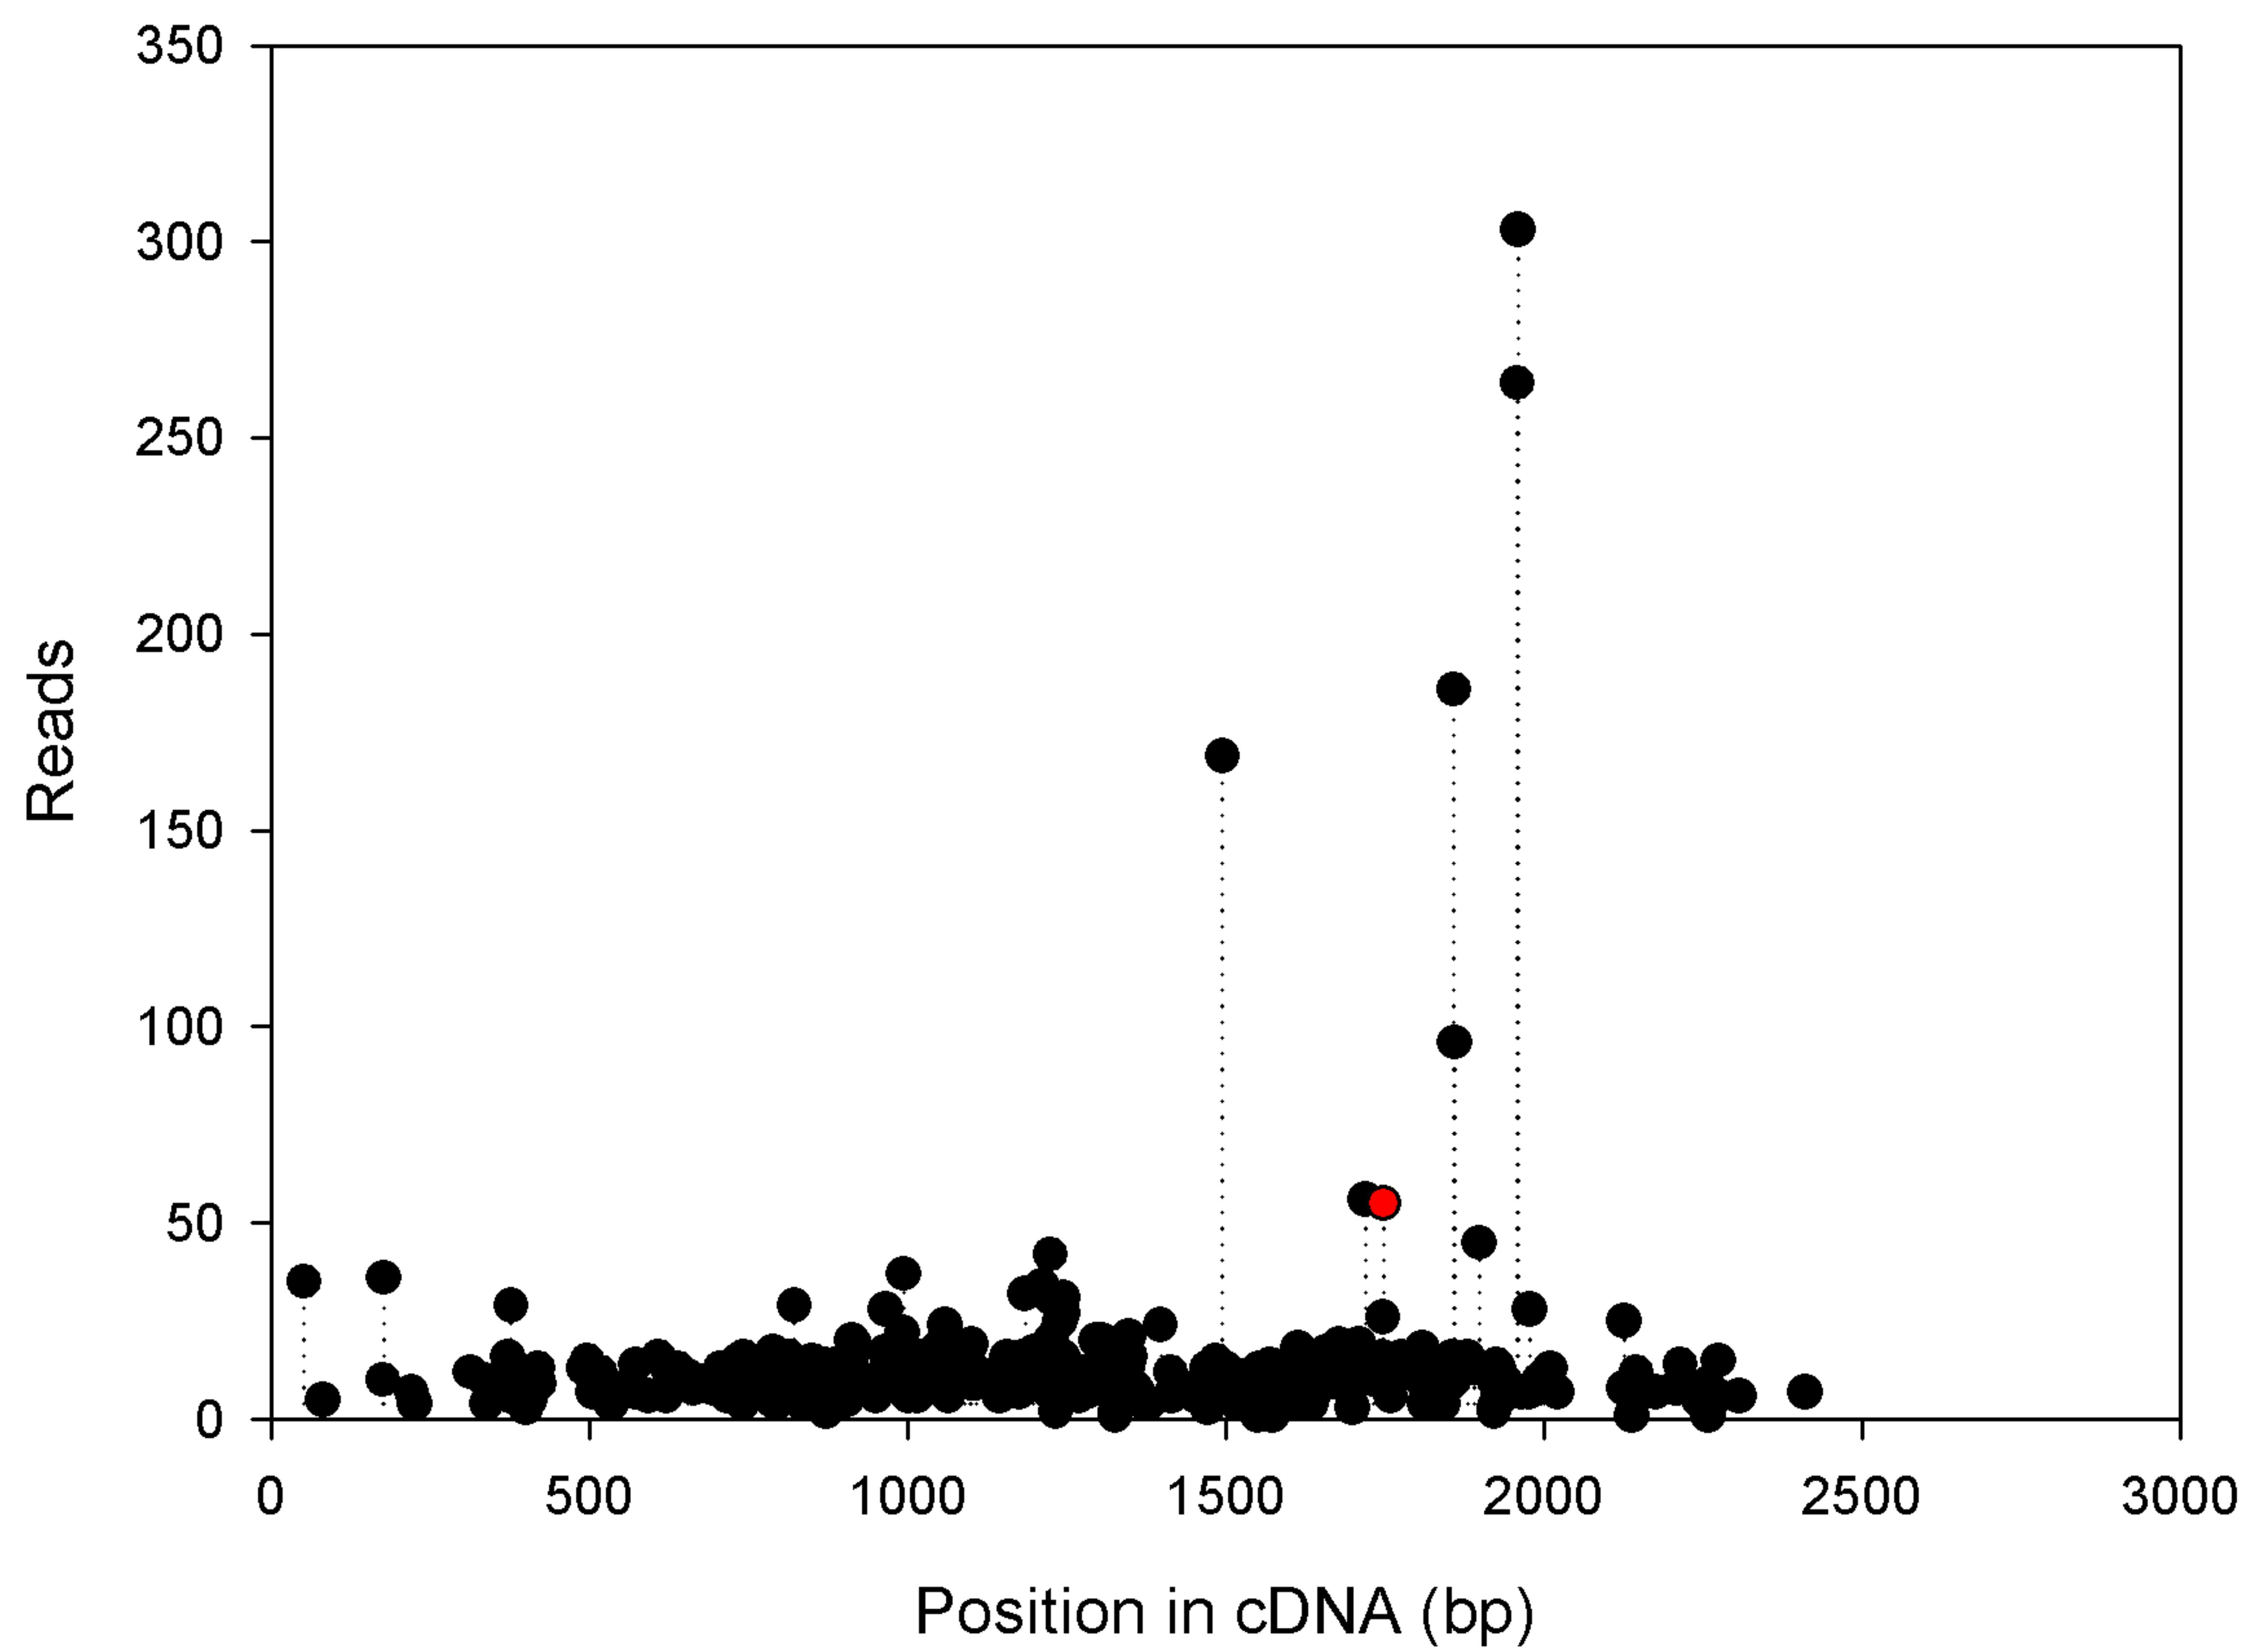

```
5' GAAGGAAUGGAUGGAUGAGAUUCUUU 3'  
  :: : :::::::::::::::::::::  
3' -UUACACACCUACUUAUUCUAA---- 5'
```

Cs9g08050.1

Csi-miR482c-Cs9g06846.1-5

Csi-miRN20-Cs3g05320.1-23, target=Cs7g19800.1 gene=Cs7g19800  
 Category:3  
 Score:4.5  
 Cleavage site:2805

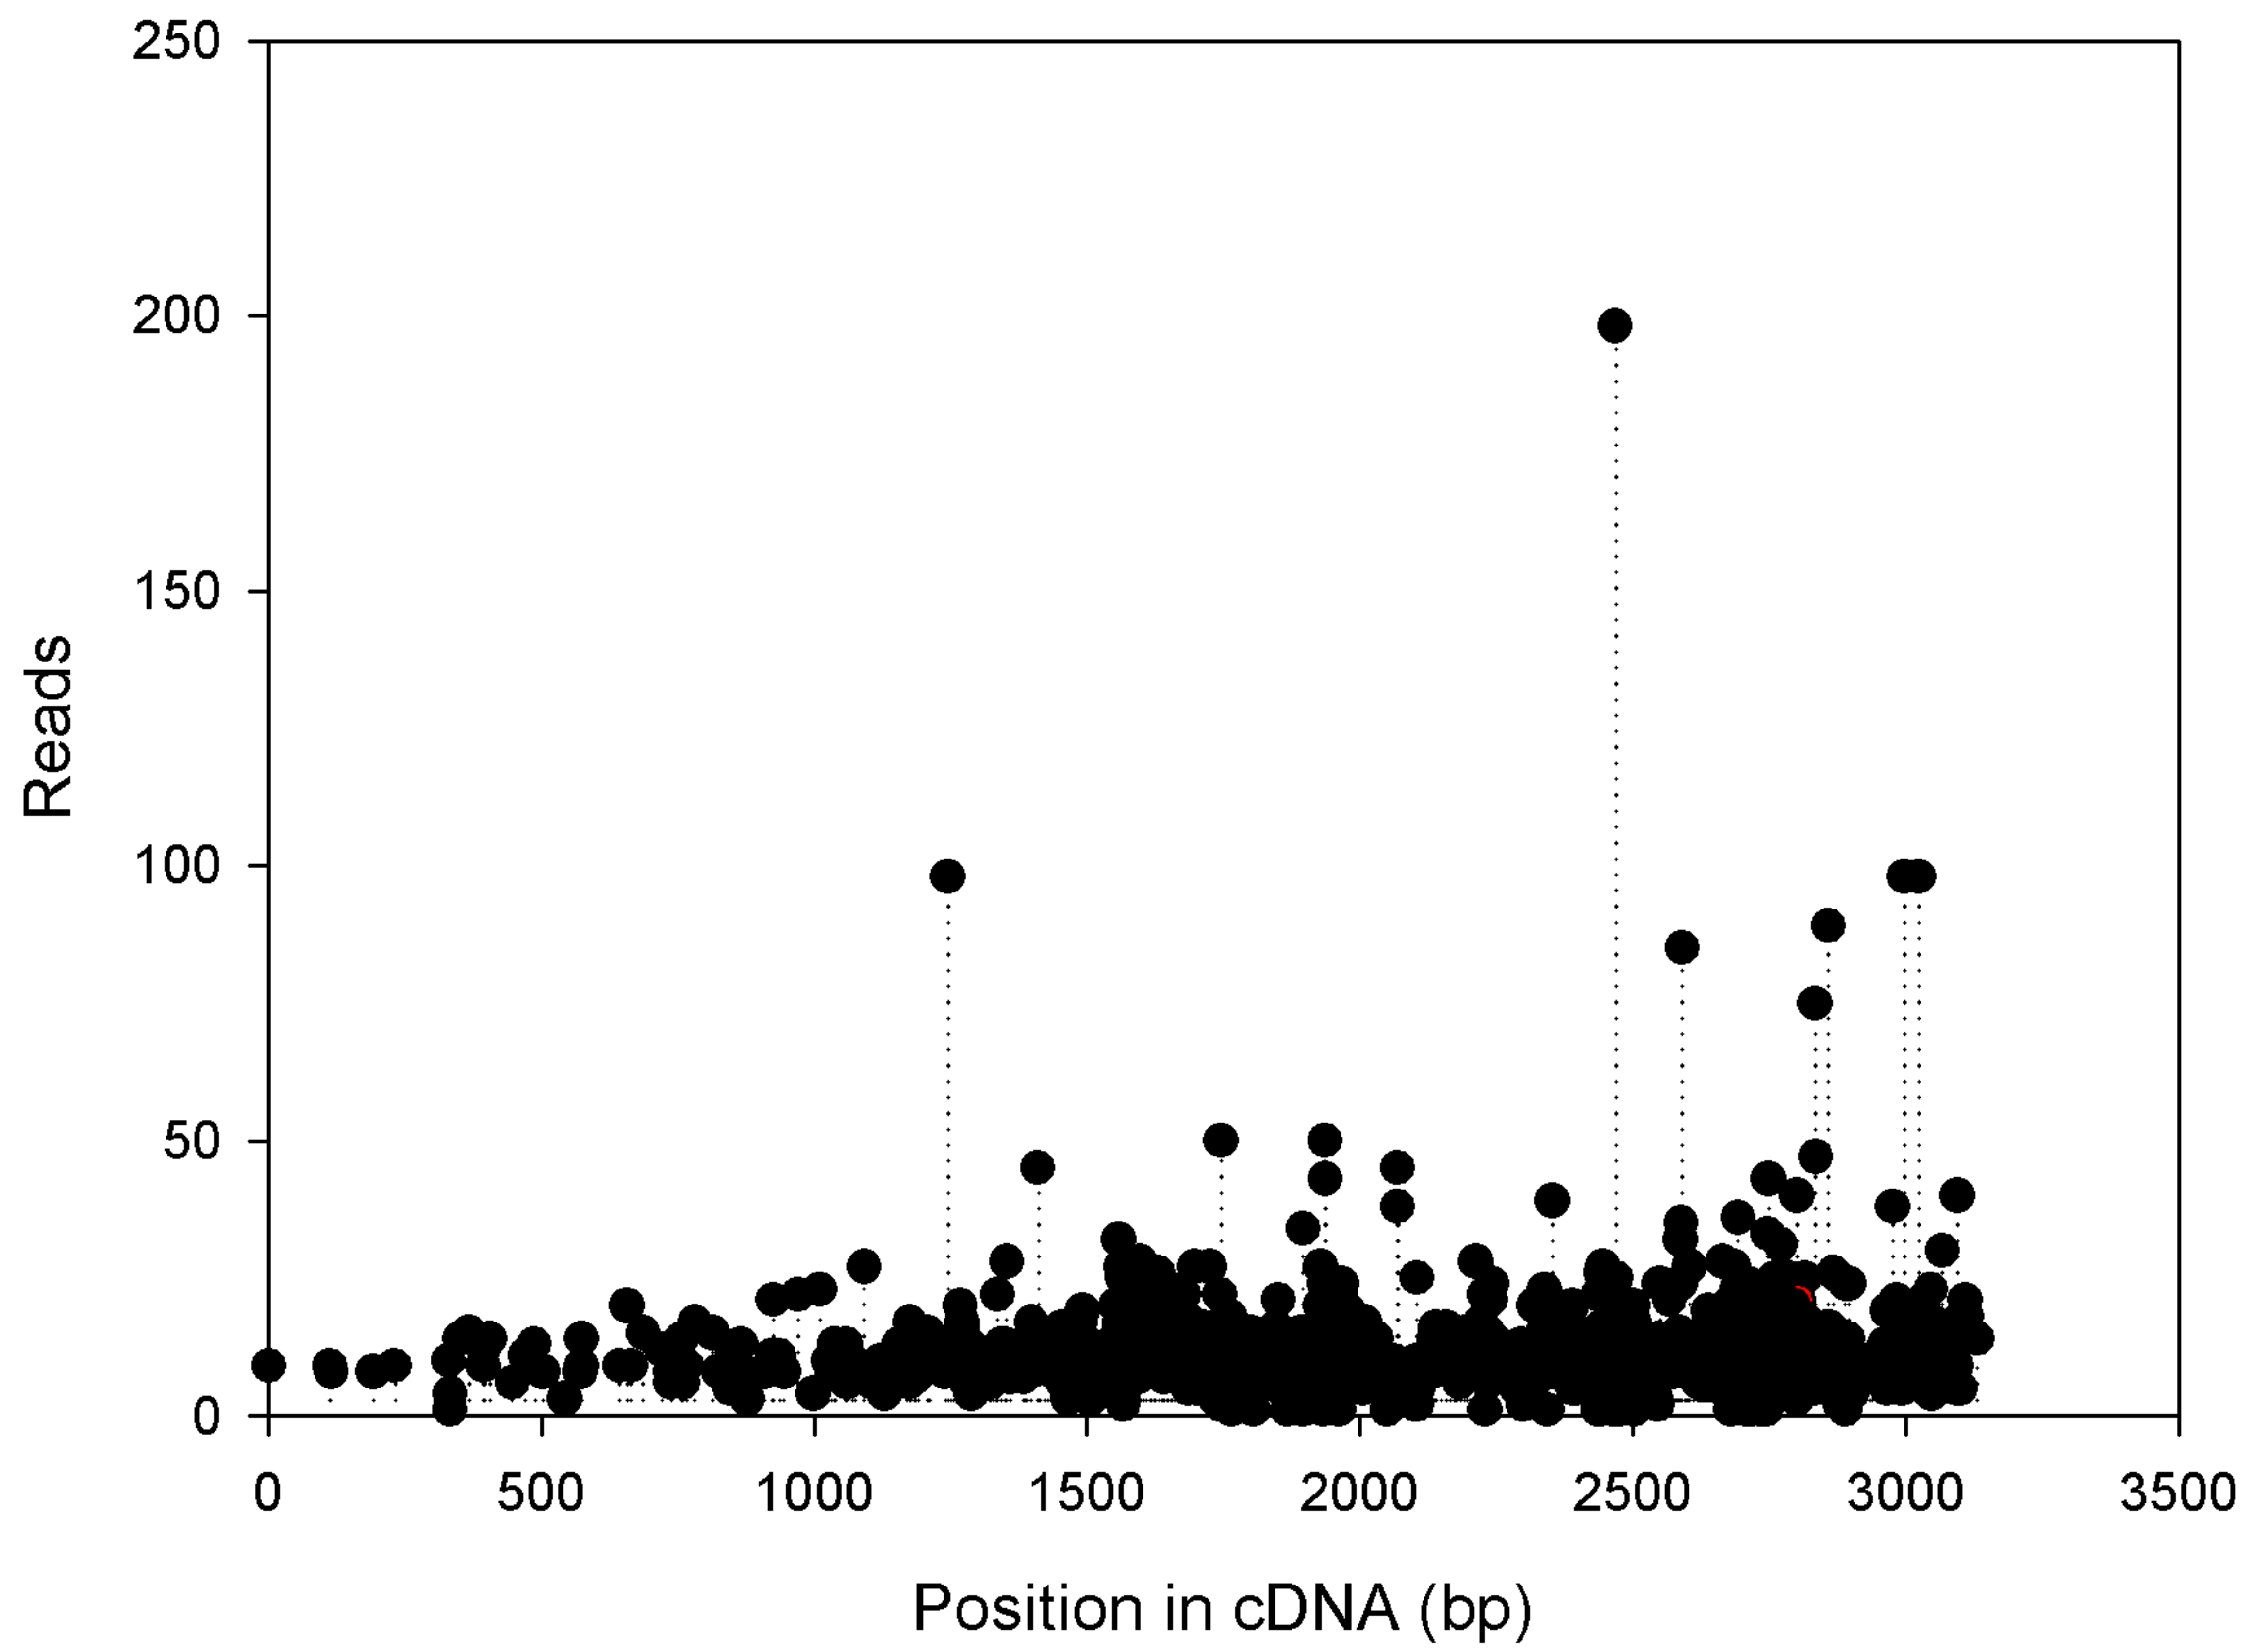

5' UGUUGUUUGUACUCCAUUUUGAUUU 3'  
 .....  
 3' --UAUGAG-AUGAAGGUAAGACUA-- 5'

Cs7g19800.1

Csi-miRN20-Cs3g05320.1-23

Csi-miRN20-Cs3g05320.1-24, target=Cs1g12760.1 gene=Cs1g12760  
Category:1  
Score:4.5  
Cleavage site:652

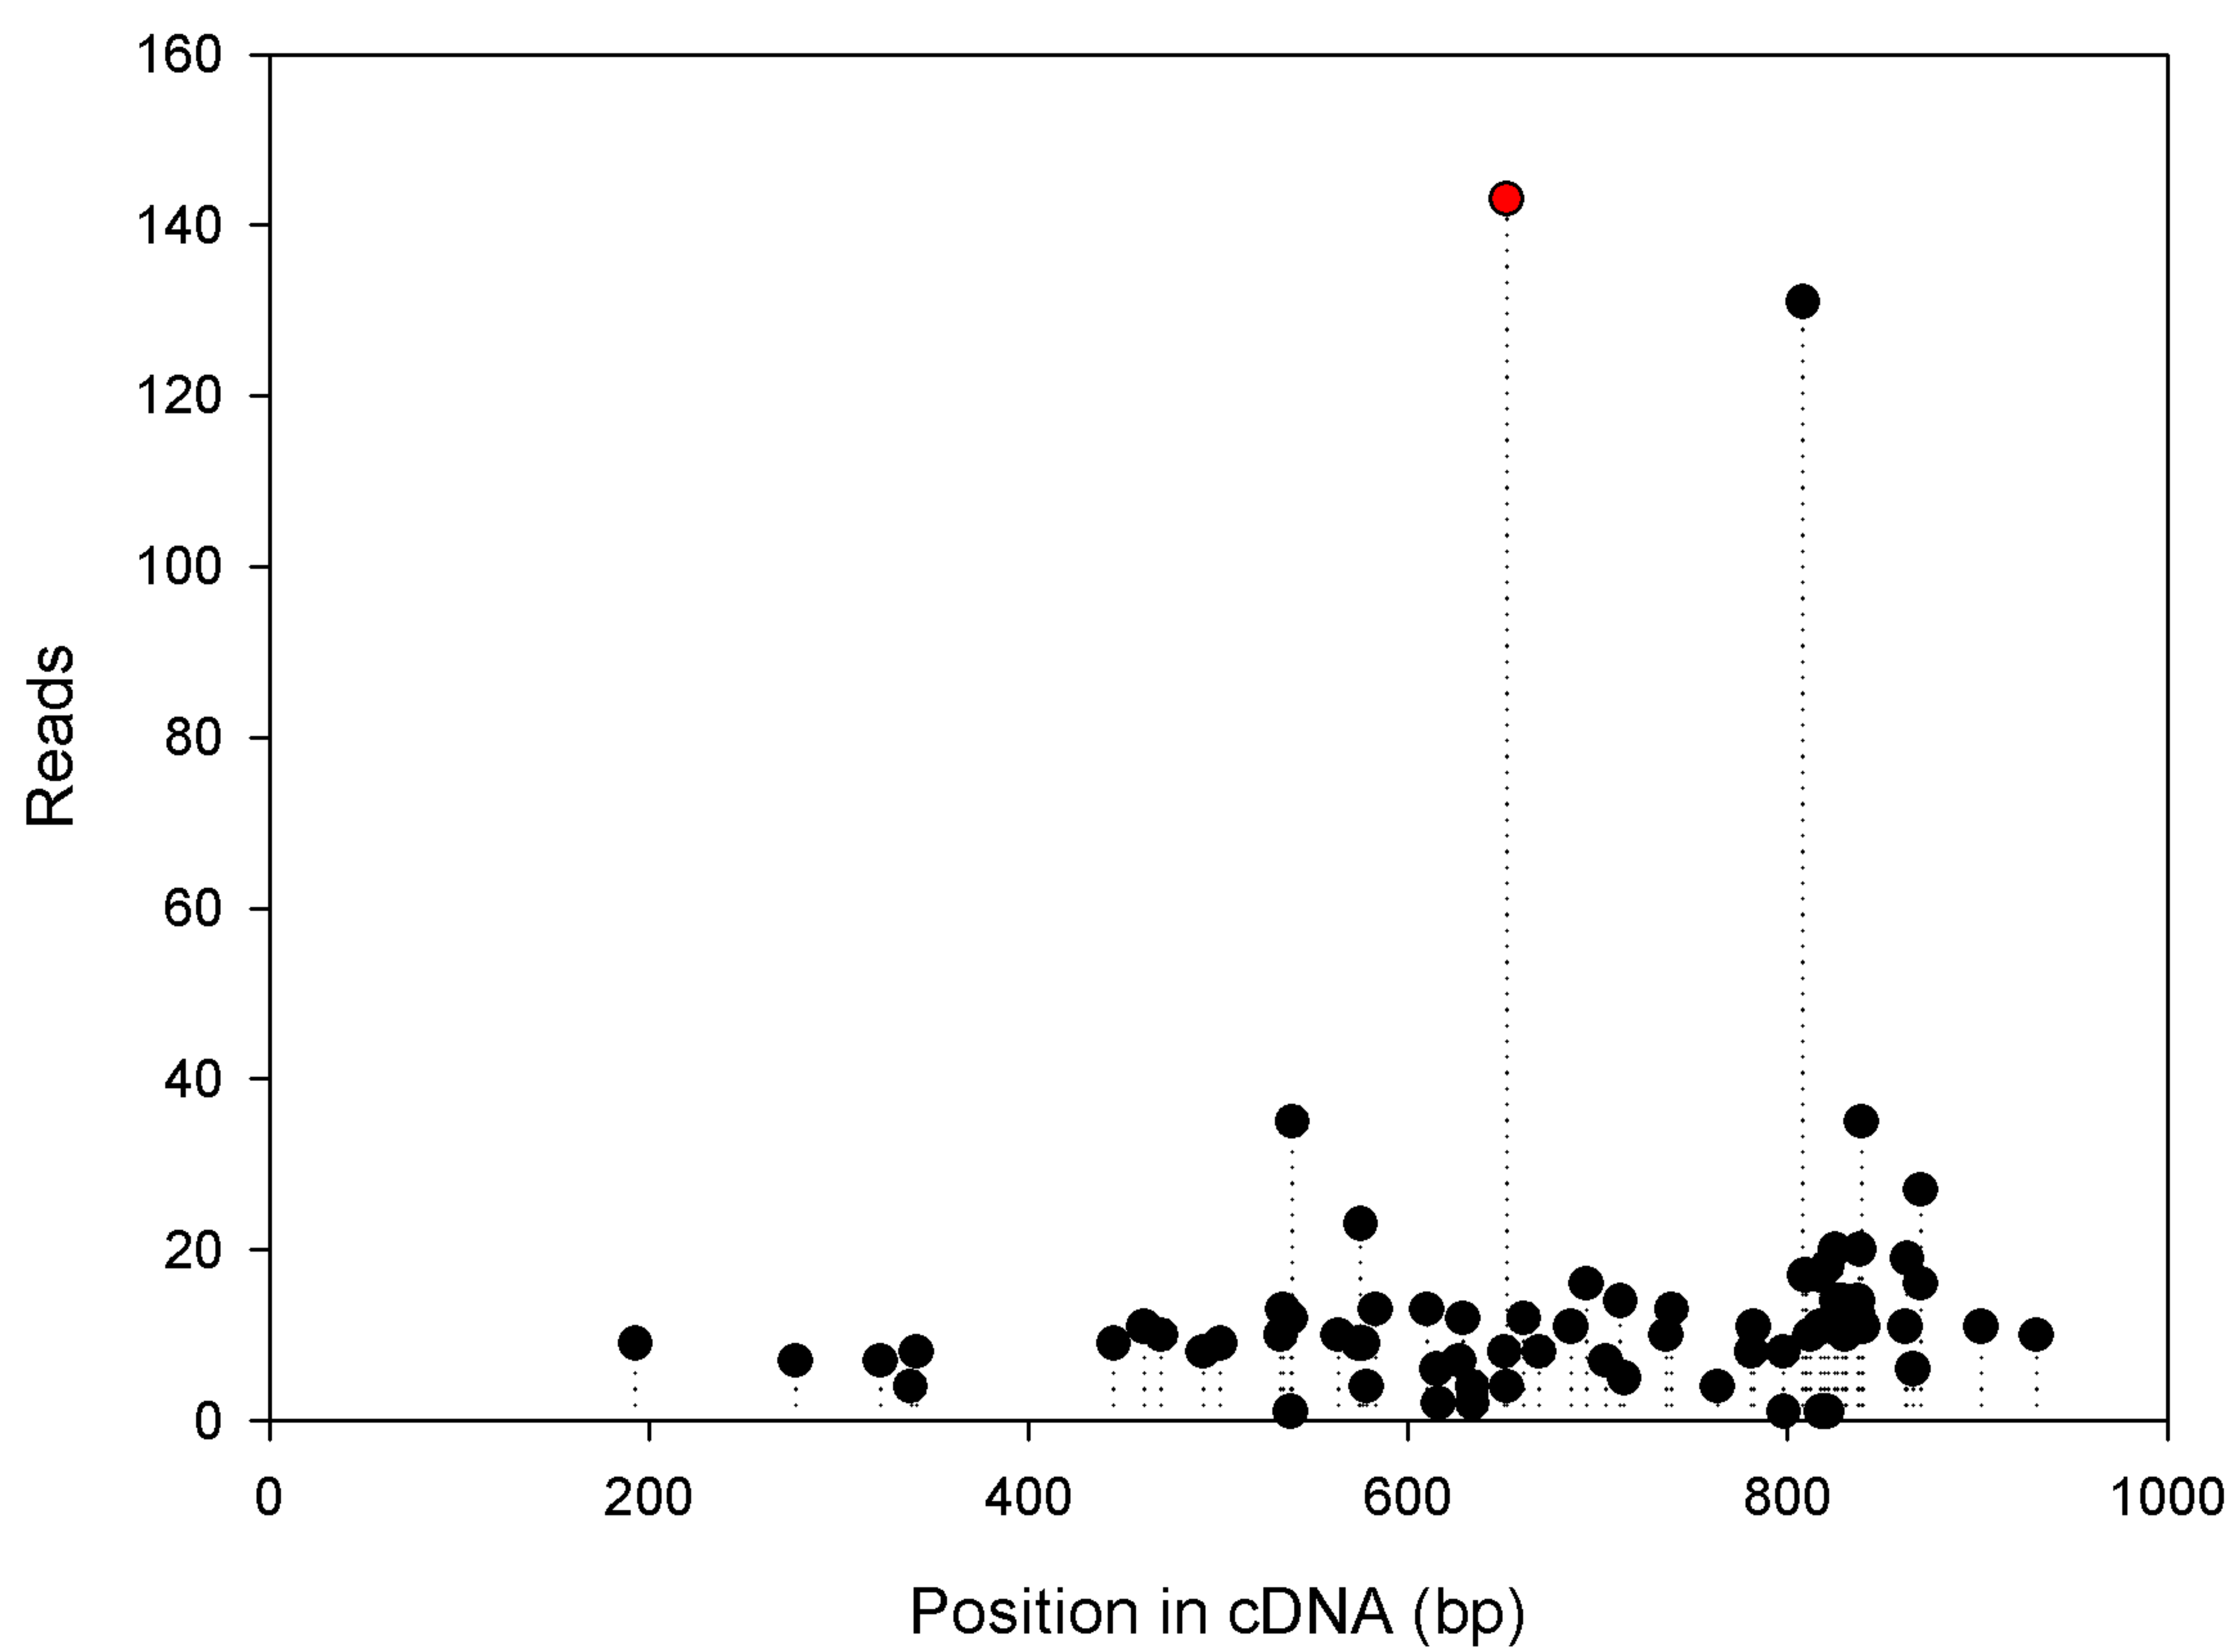

5' UAUGUCGGC-UGGGUGACUAUUAUCAU 3'  
  :  :  :  :  :  :  :  :  :  :  :  :  :  :  :  :  :  
3' -----GUUGUAGUCAUUGAUAAUAGU- 5'

Cs1g12760.1  
Csi-miRN20-Cs3g05320.1-24

Csi-miRN20-Cs3g05320.1-26, target=Cs1g15370.1 gene=Cs1g15370

Category:3

Score:4.5

Cleavage site:792

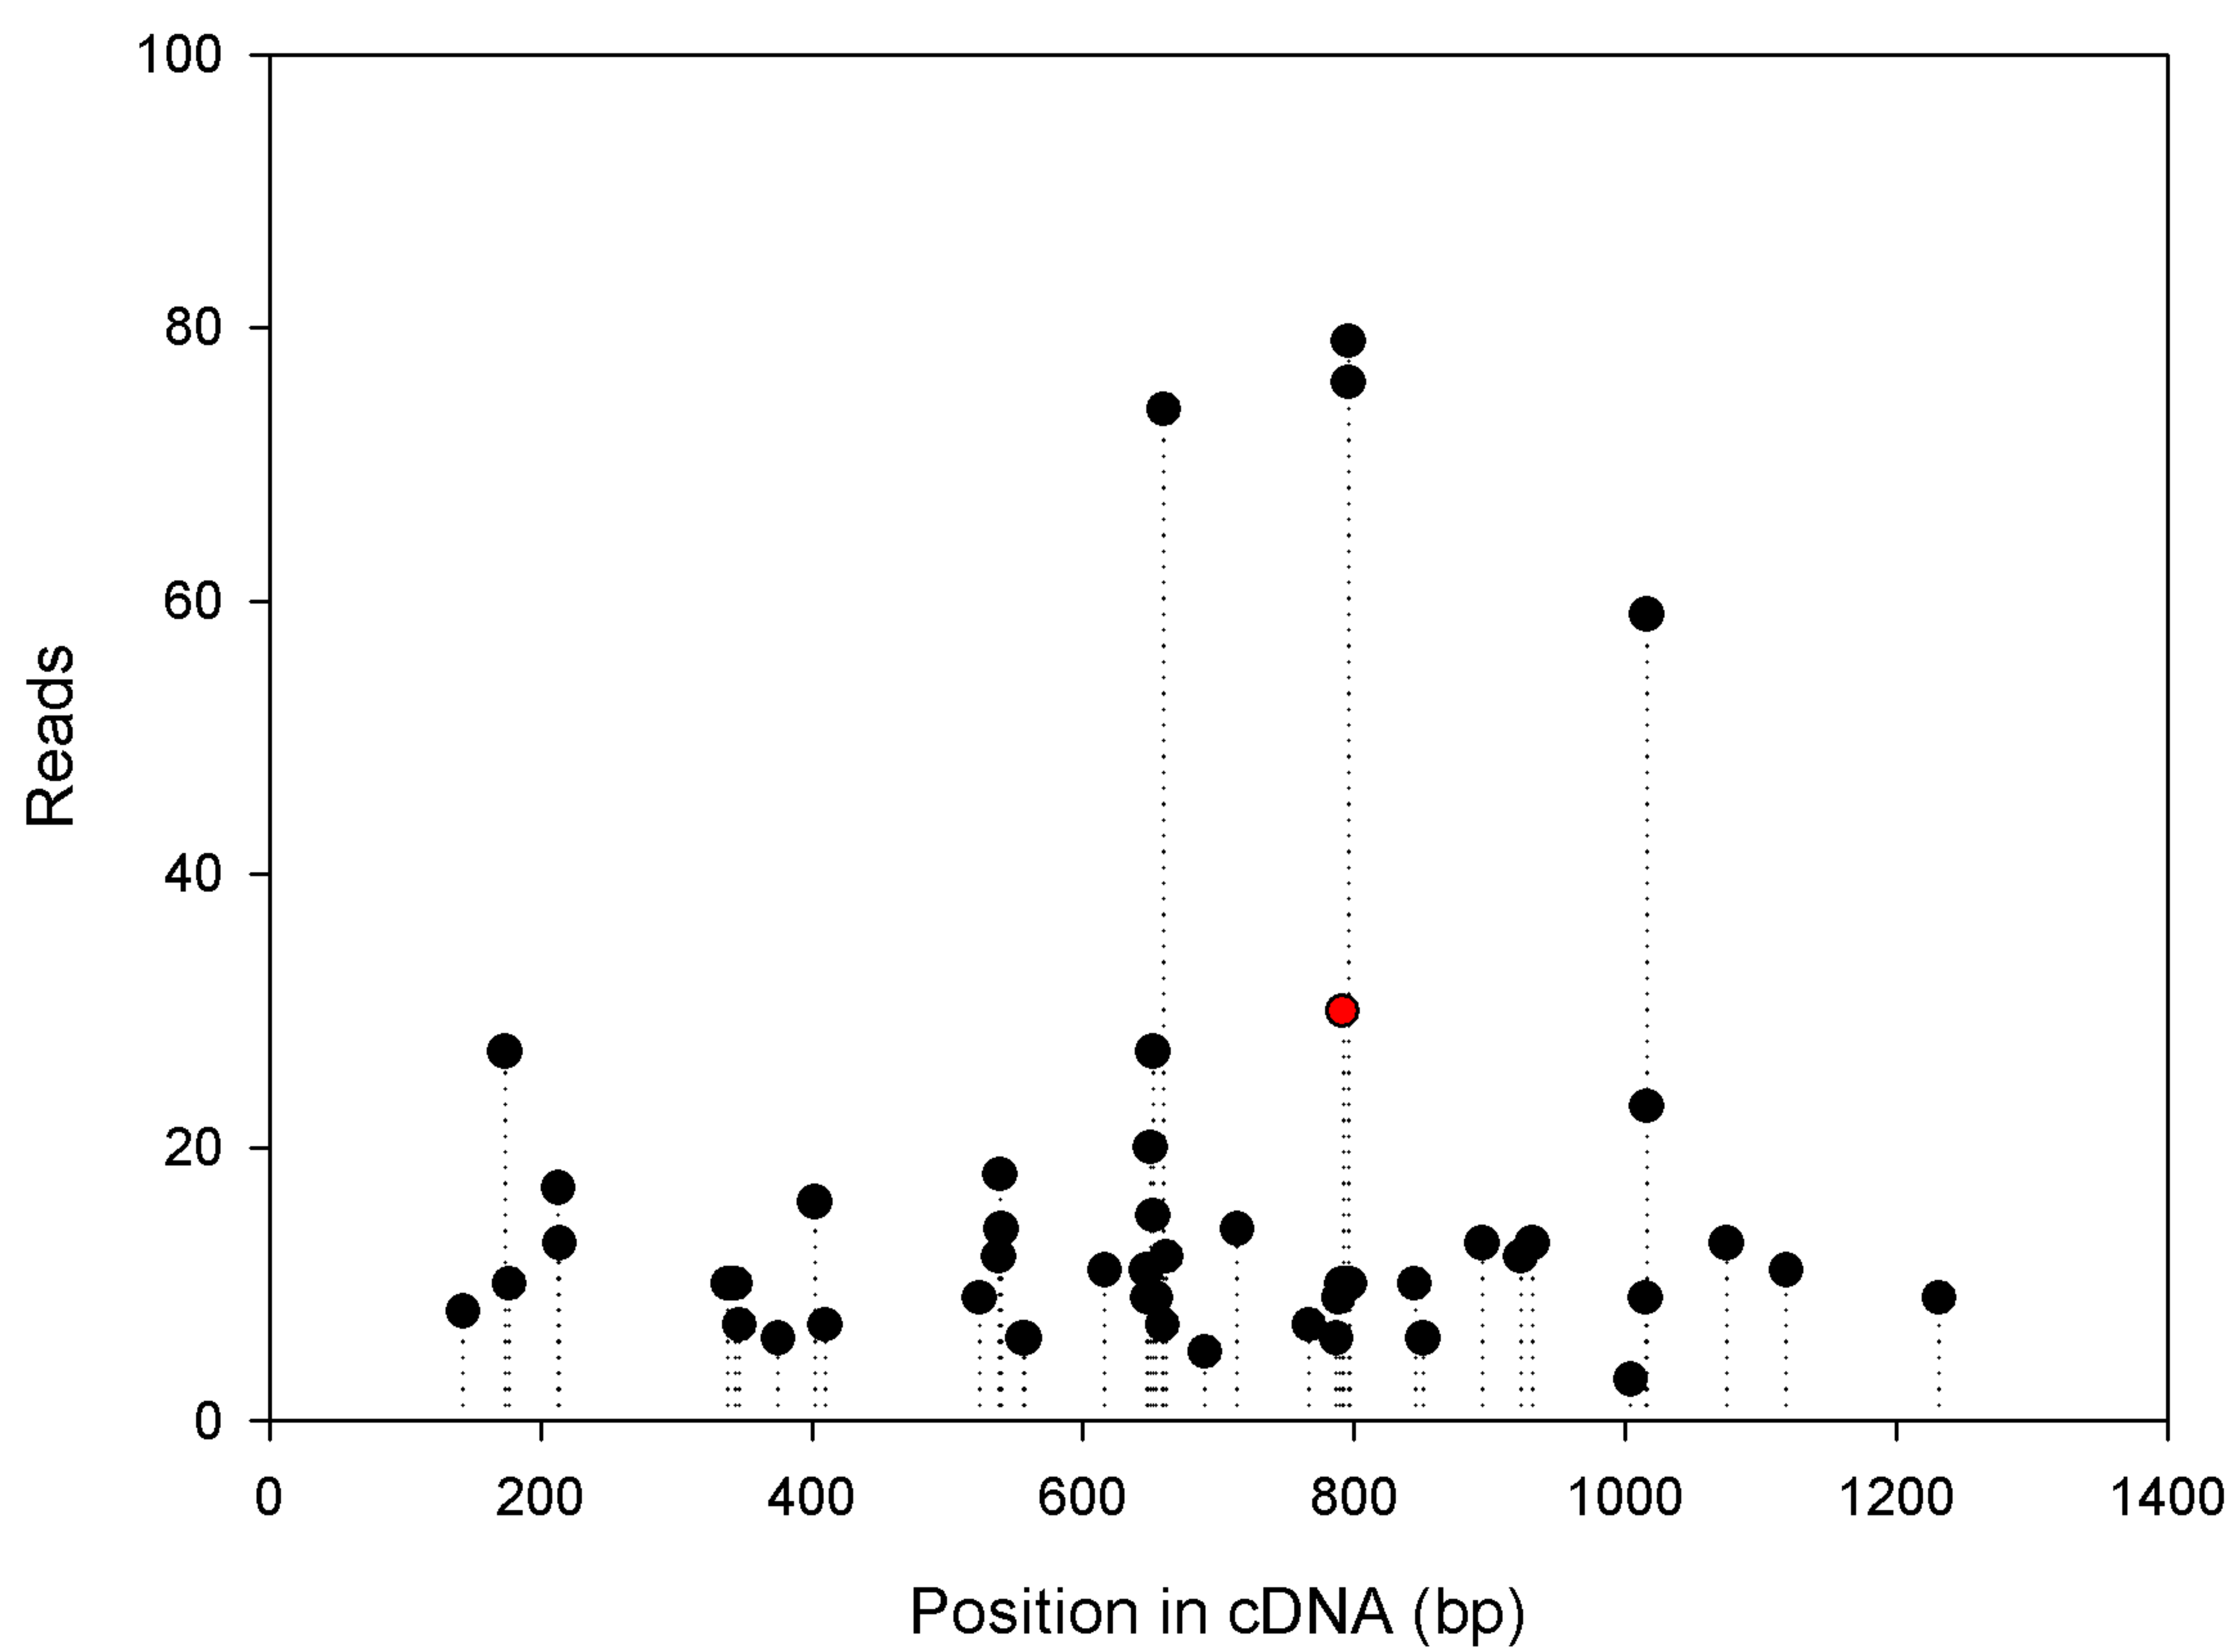

5' UACAAUCAU-UCUCUGC UUUCCGCAGA 3'

Cs1g15370.1

..... : .....

3' --GUUAGAAGAGAGACAAAAGGU---- 5'

Csi-miRN20-Cs3g05320.1-26

Csi-miRN20-Cs3g05320.1-26, target=Cs3g15060.1 gene=Cs3g15060  
 Category:3  
 Score:5  
 Cleavage site:1378

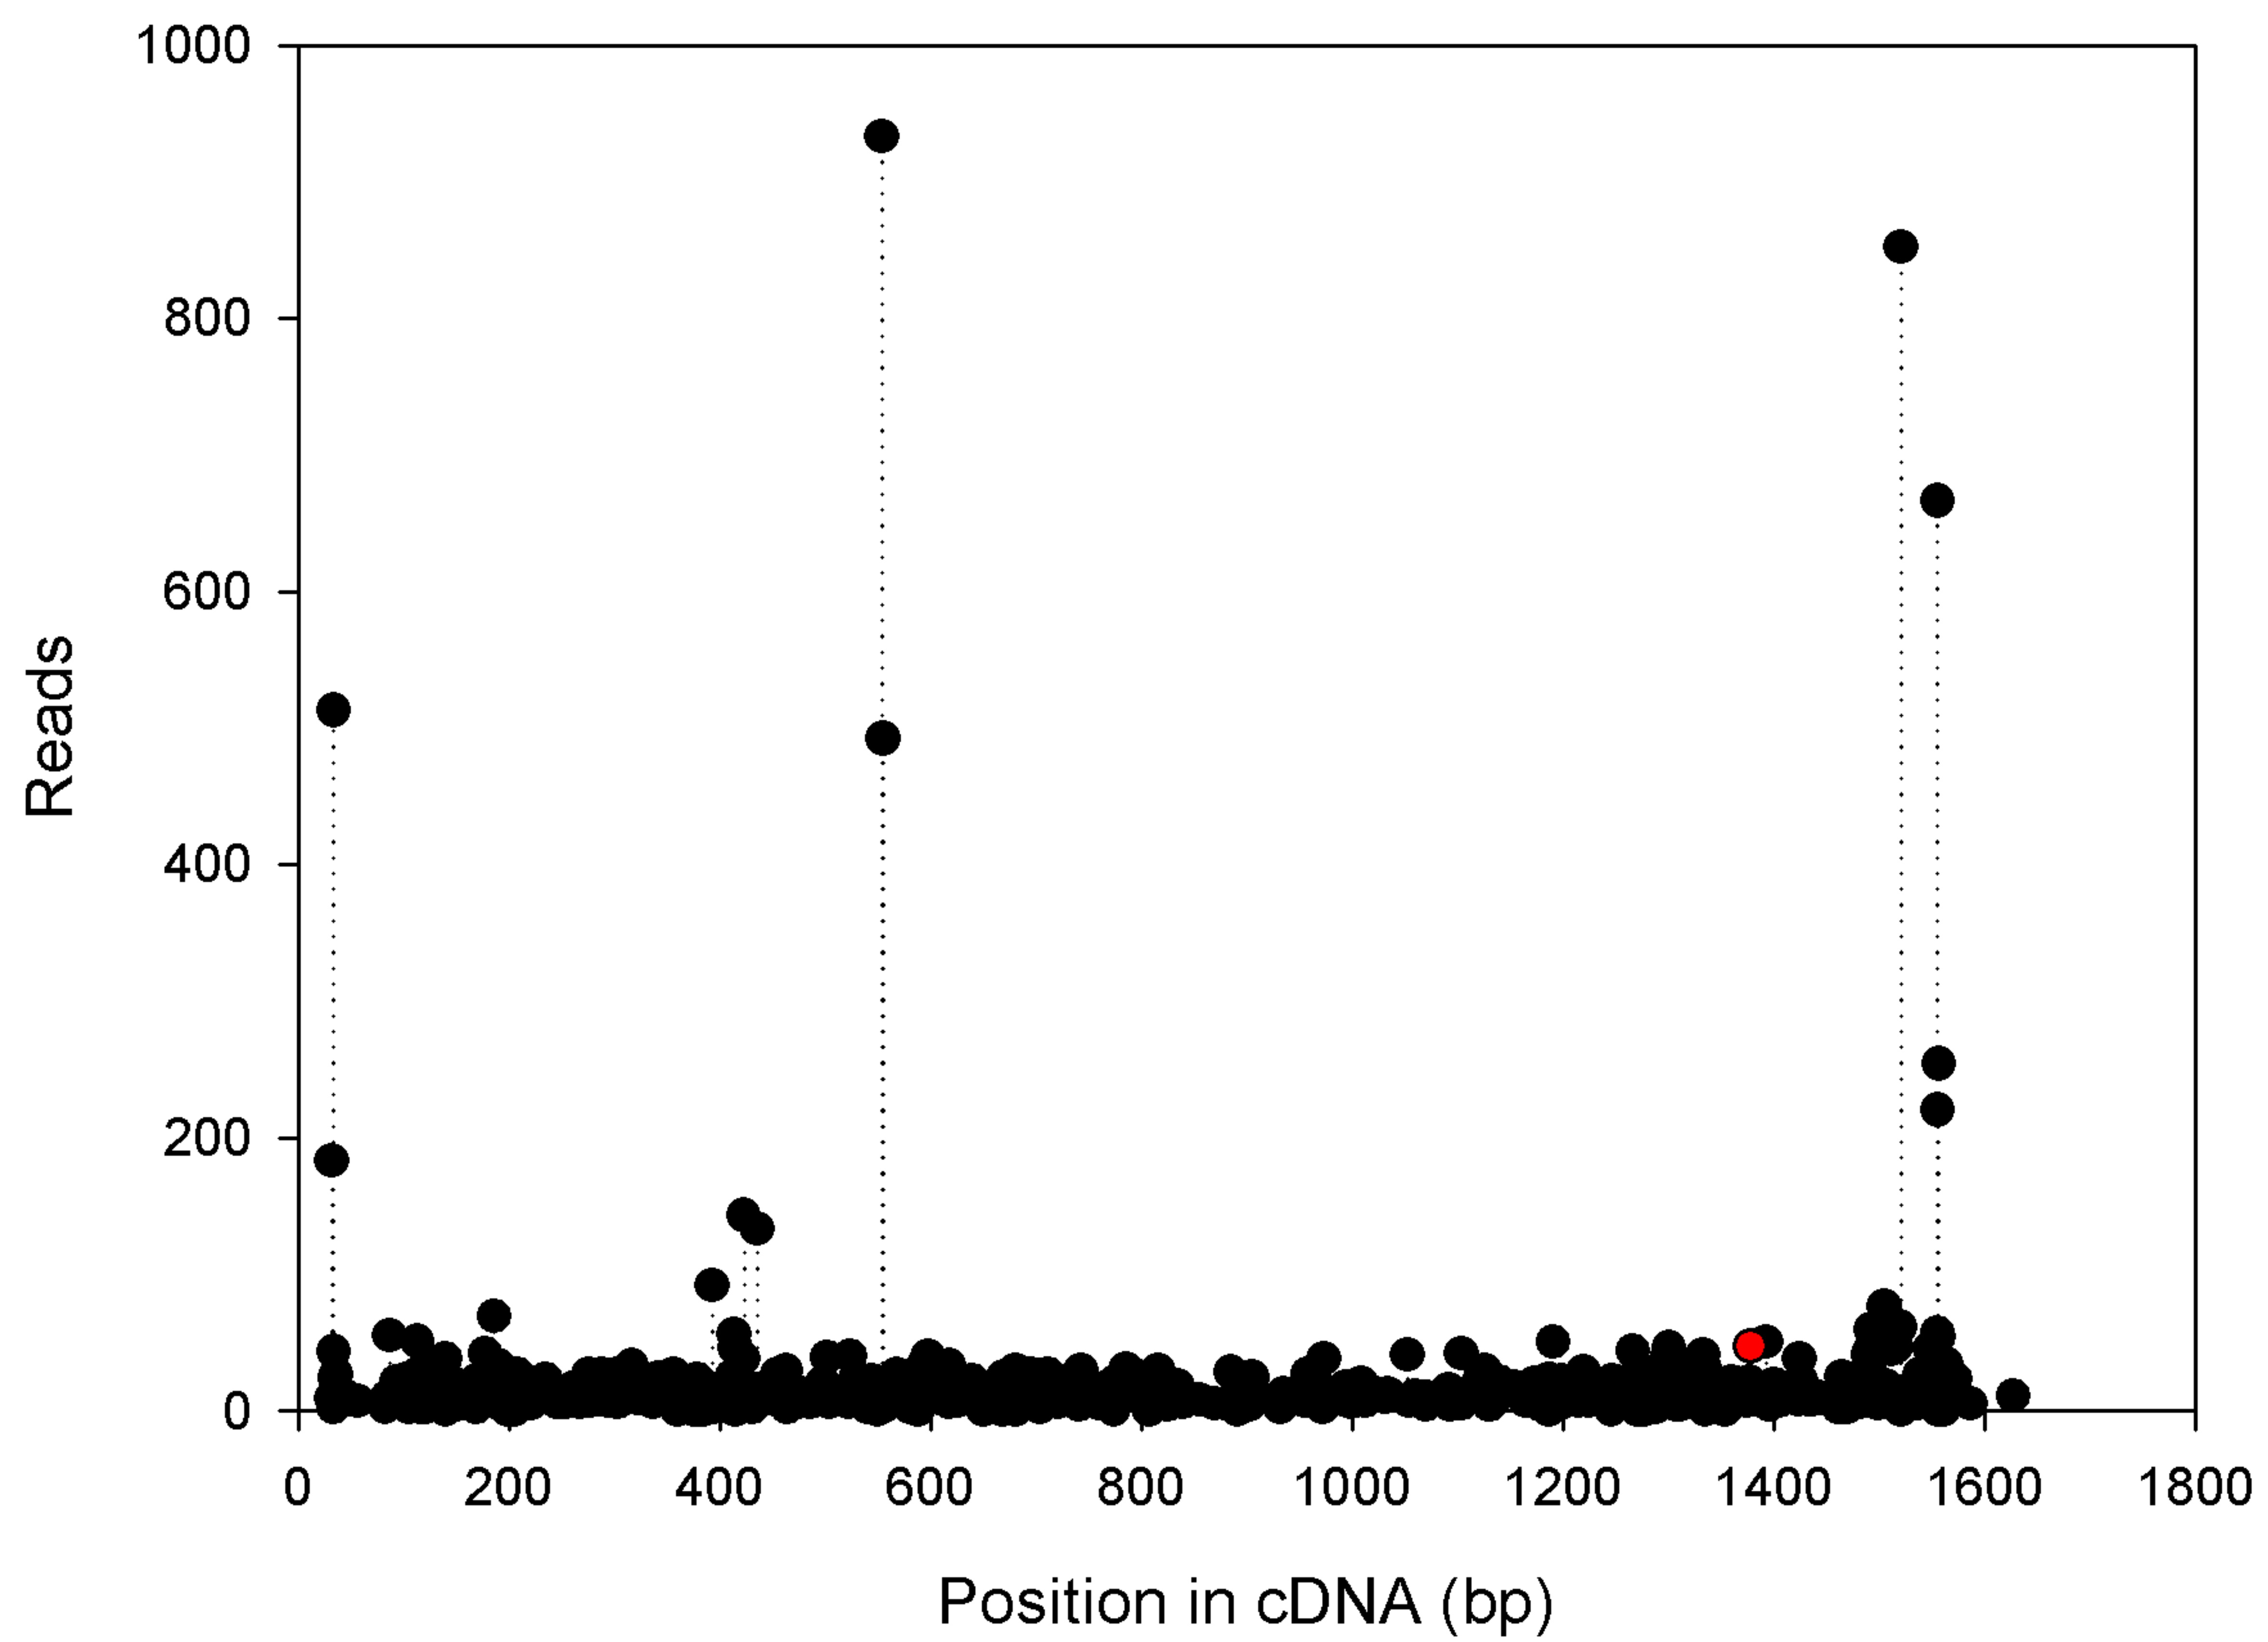

```
5' CAAAUU-UUUCUGUUUUCUAUUUUGA 3'
   :::  ::  :::::::::::::::
3' GUUAGAAGAGAGACAAAAGGU----- 5'
```

Cs3g15060.1

Csi-miRN20-Cs3g05320.1-26



Csi-miRN20-Cs3g05320.1-26, target=Cs6g18830.1 gene=Cs6g18830

Category:3

Score:5

Cleavage site:676

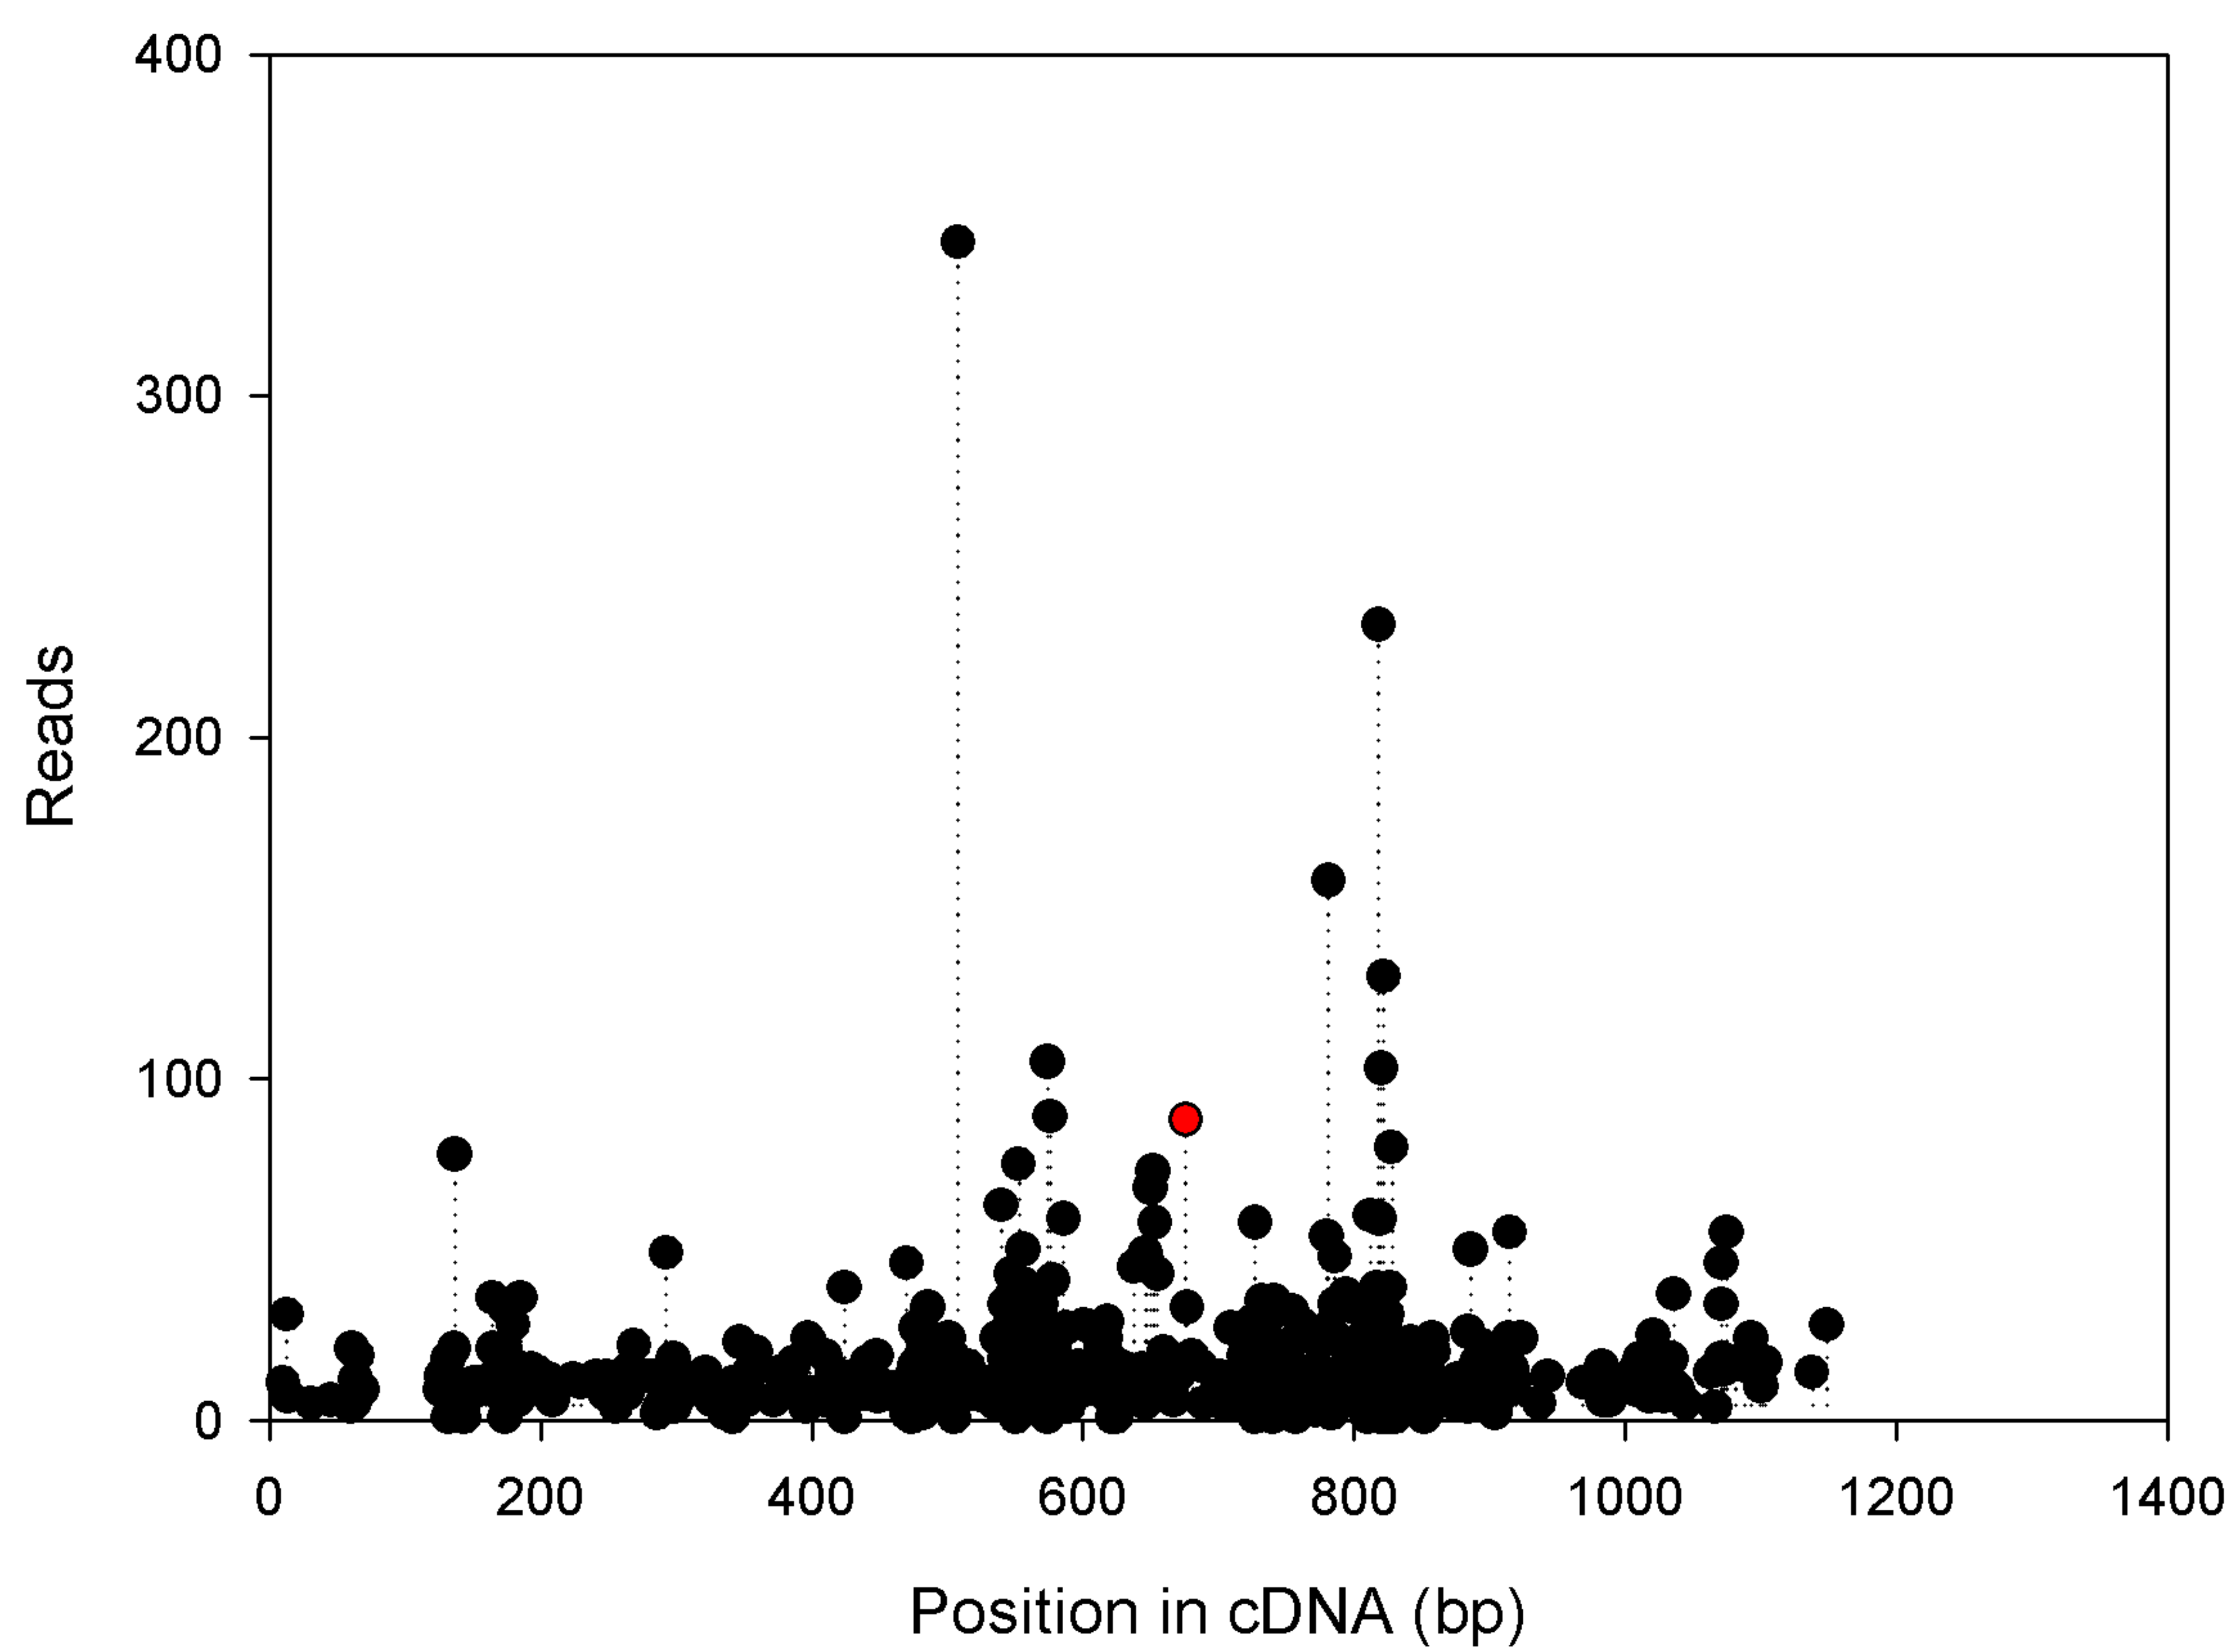

5' UGCACUCAACUUCUCUGUUUUCUACU 3'

Cs6g18830.1

:: :: : :::::::::::::::

3' --GUUAGAAG-AGAGACAAAAGGU-- 5'

Csi-miRN20-Cs3g05320.1-26

Csi-miRN20-Cs3g05320.1-36, target=Orange1.1t00530.2 gene=Orange1.1t00530

Category:3

Score:5

Cleavage site:1873

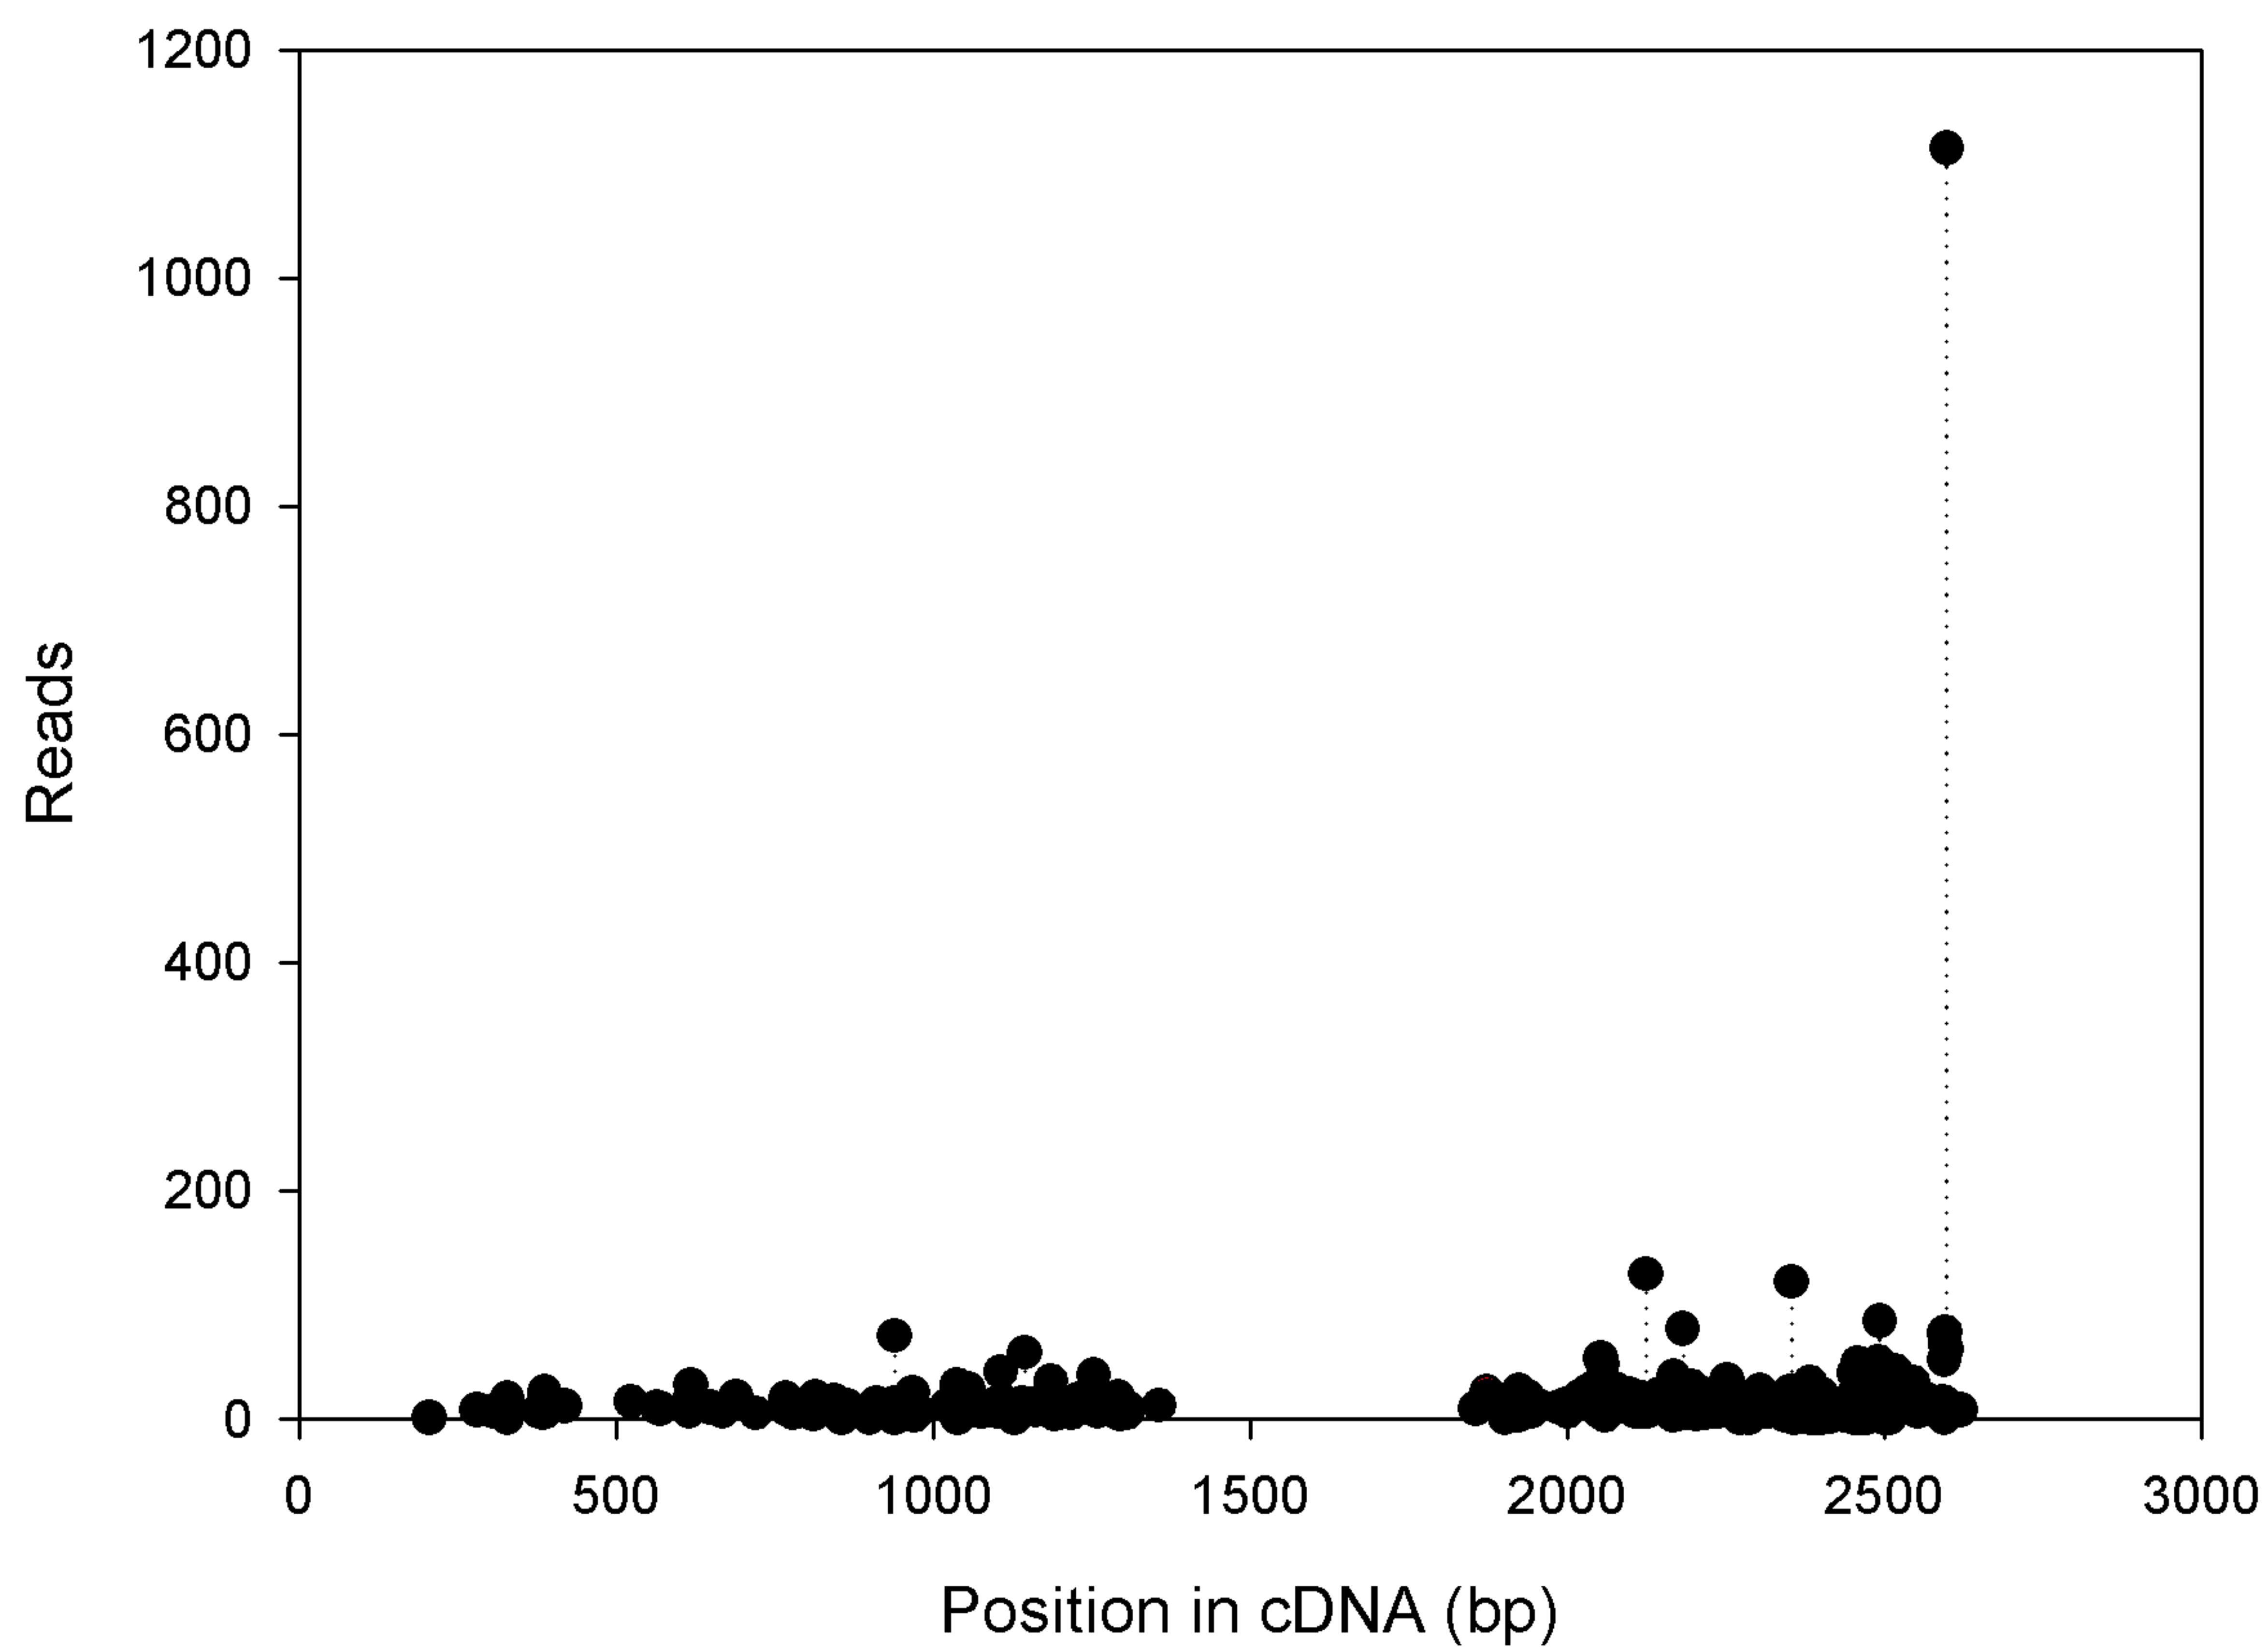

```
5' AUAUCCAAGCA-GCGUGGAAGAUGGAA 3'  
   ::::: :::::::::::::::::::::  
3' -----UUCGUACGUACCUUCUGUCUG 5'
```

Orange1.1t00530.2

Csi-miRN20-Cs3g05320.1-36

Csi-miRN20-Cs3g05320.1-4, target=Cs5g18400.1 gene=Cs5g18400  
 Category:2  
 Score:5  
 Cleavage site:726

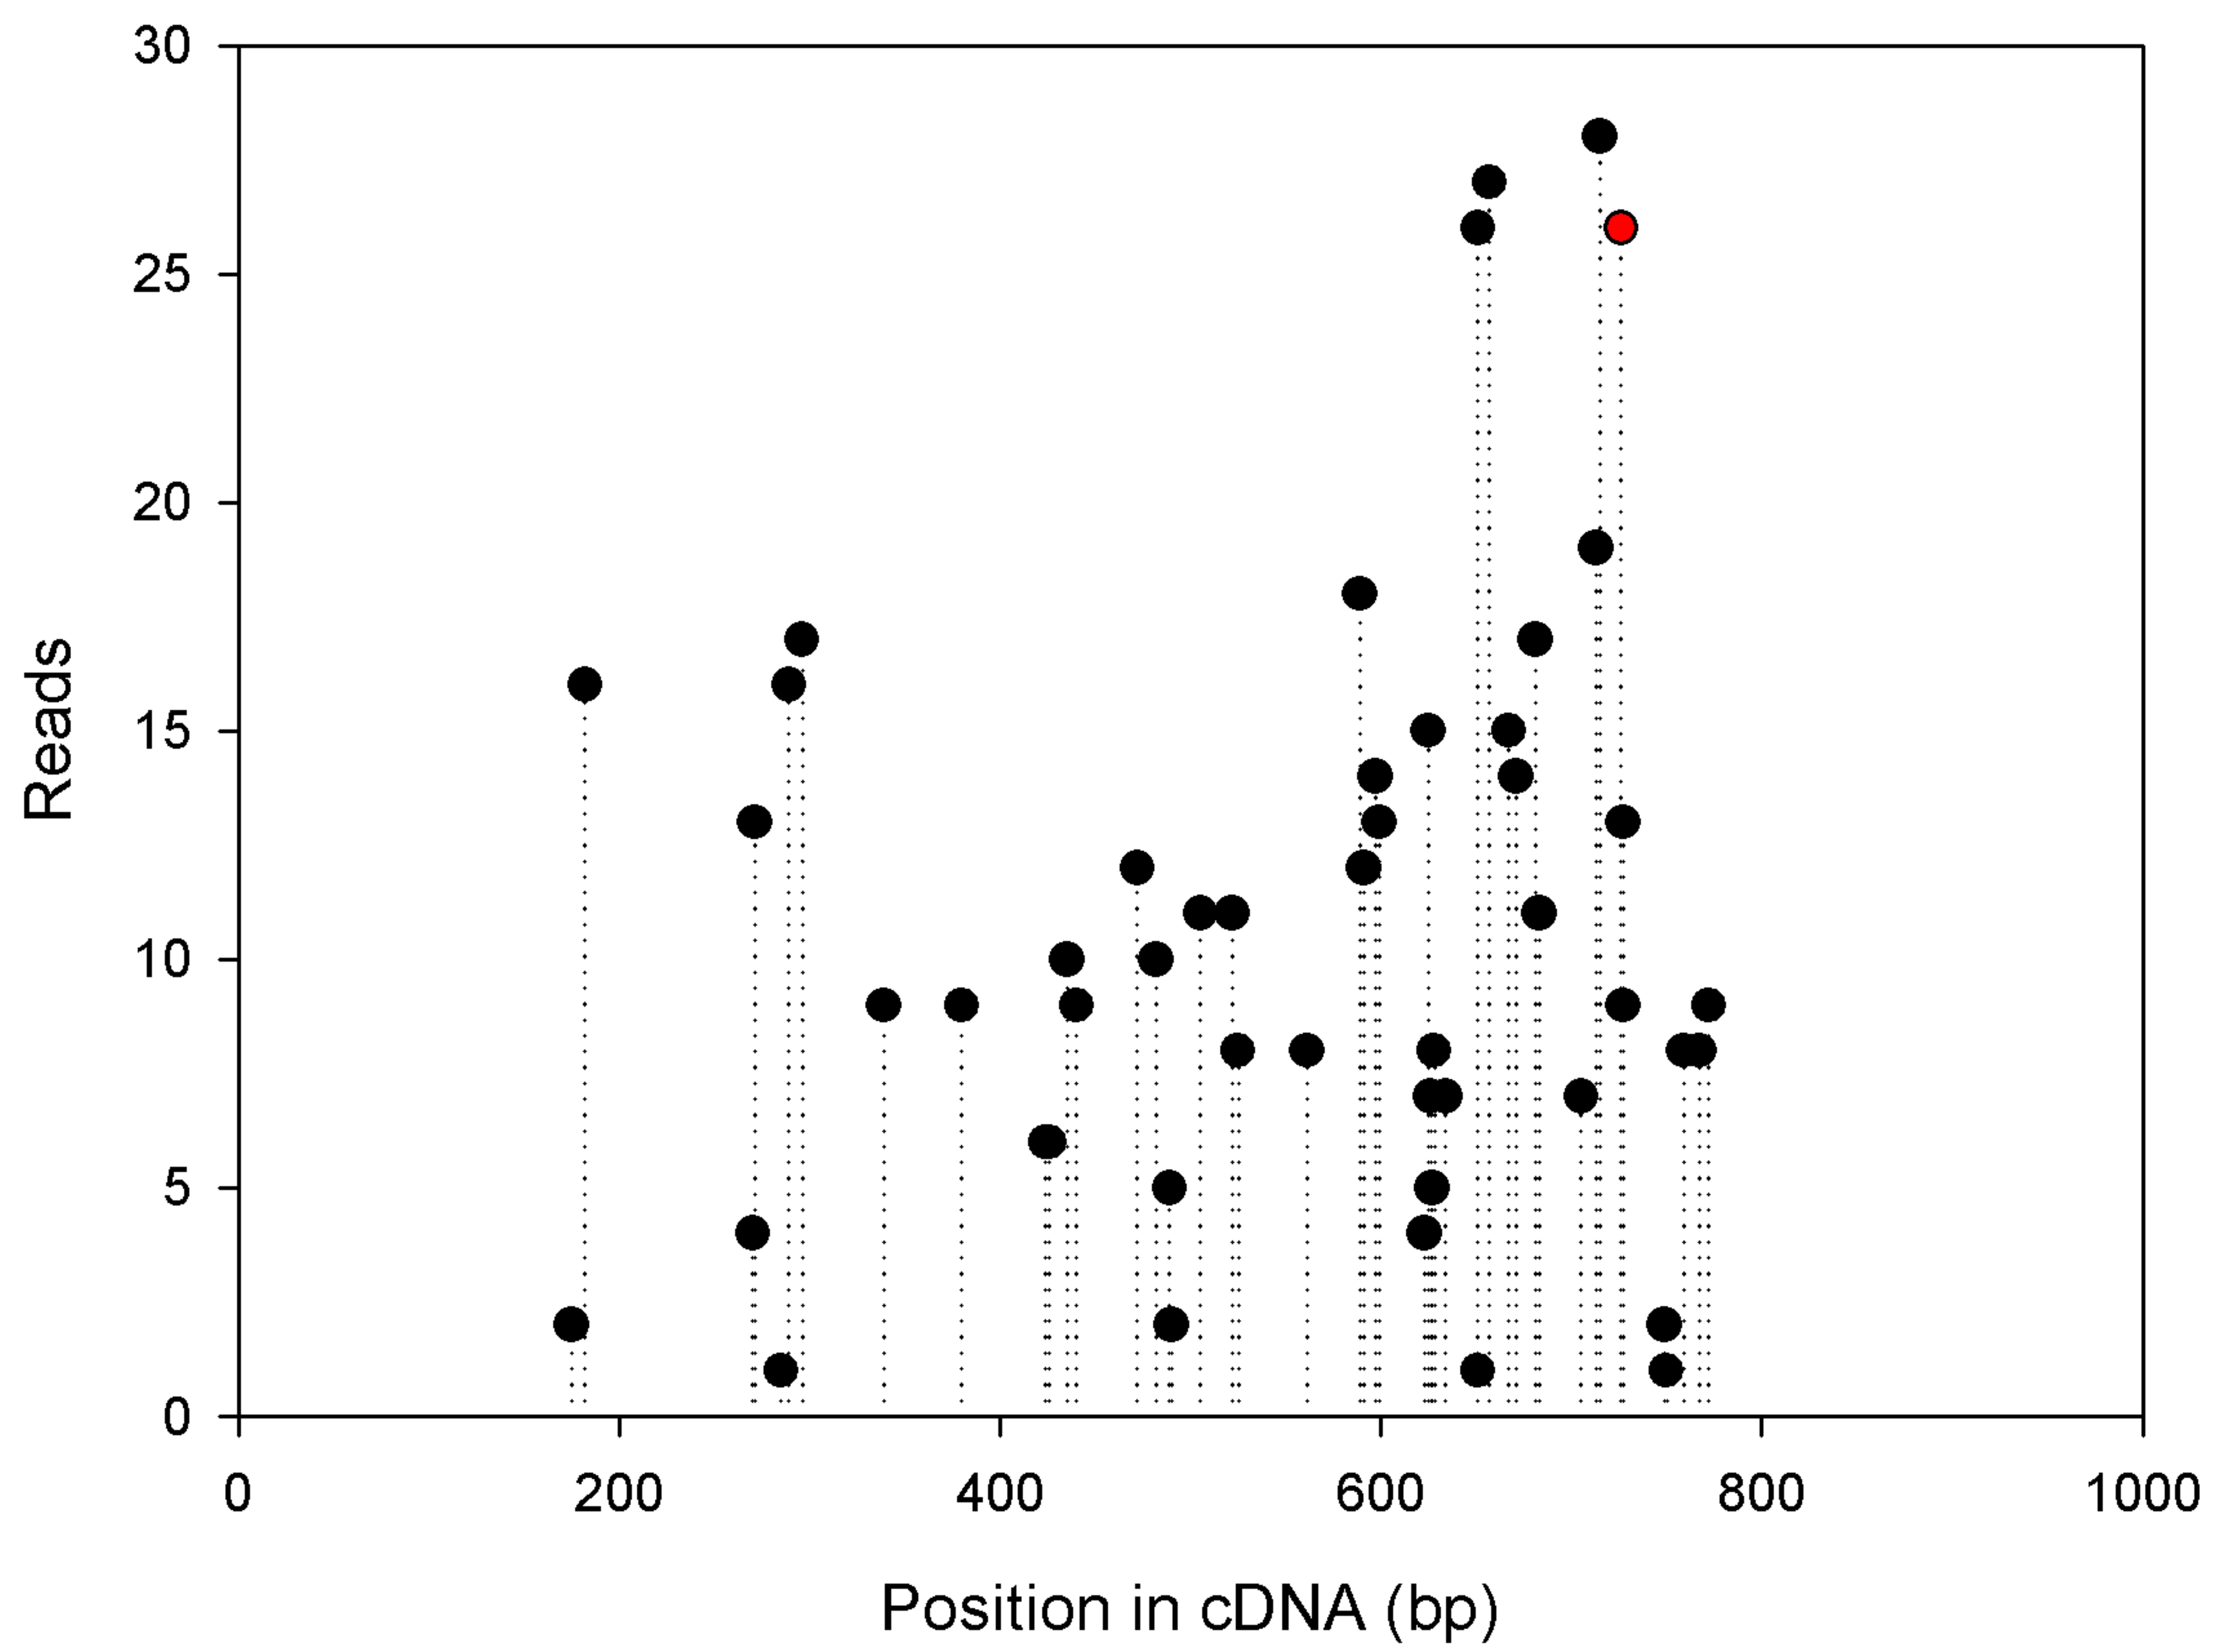

5' CUACUGAUUAAUGAAUUUUACUGU 3'  
 ::::::::::: :::::::::::  
 3' ---CAUUAUAGUUAC-UAAAAUGAA- 5'

Cs5g18400.1

Csi-miRN20-Cs3g05320.1-4

Csi-miRN20-Cs3g05320.1-65, target=Cs3g01450.1 gene=Cs3g01450  
 Category:3  
 Score:4.5  
 Cleavage site:609

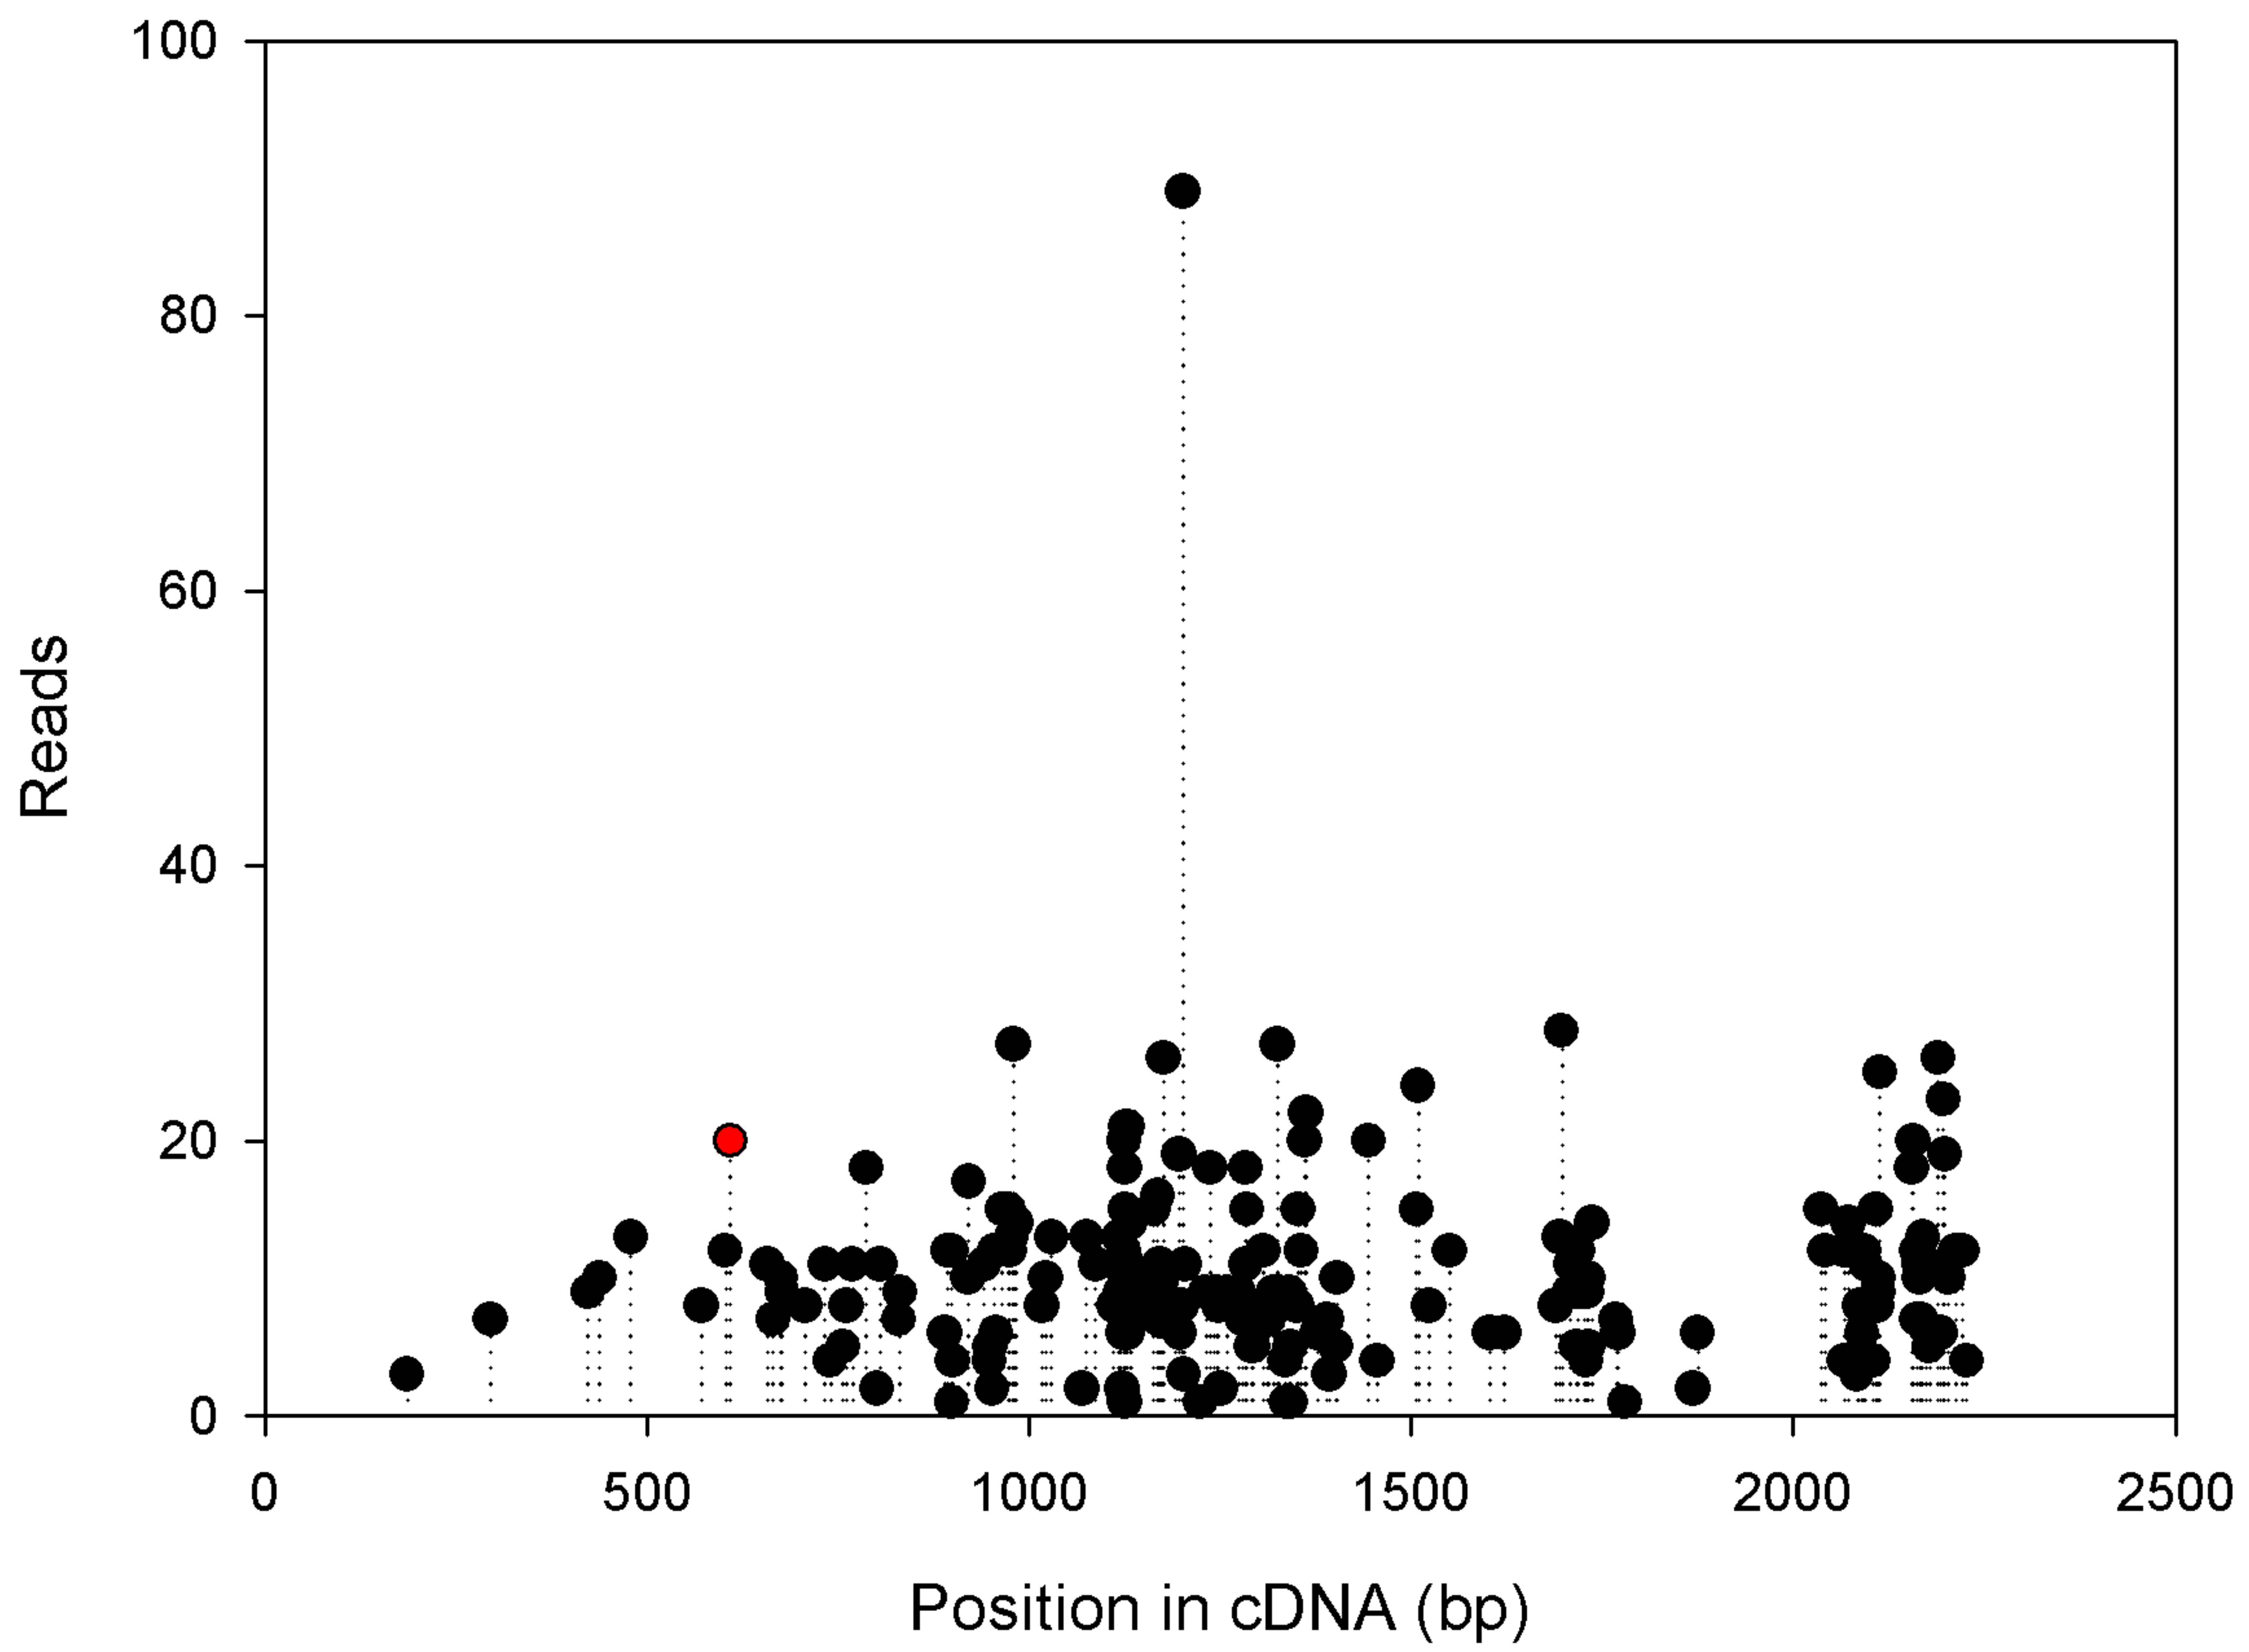

|    |                             |    |                           |
|----|-----------------------------|----|---------------------------|
| 5' | GACUUCUAU-UUCCAAAUGUACUAUGA | 3' | Cs3g01450.1               |
|    | :: .:: :::::::::::::: ::::  |    |                           |
| 3' | ---AACGUAGAAGGUUUACAGGAU--- | 5' | Csi-miRN20-Cs3g05320.1-65 |

Csi-miRN20-Cs3g05320.1-65, target=Orange1.1t01632.1 gene=Orange1.1t01632  
 Category:3  
 Score:4.5  
 Cleavage site:690

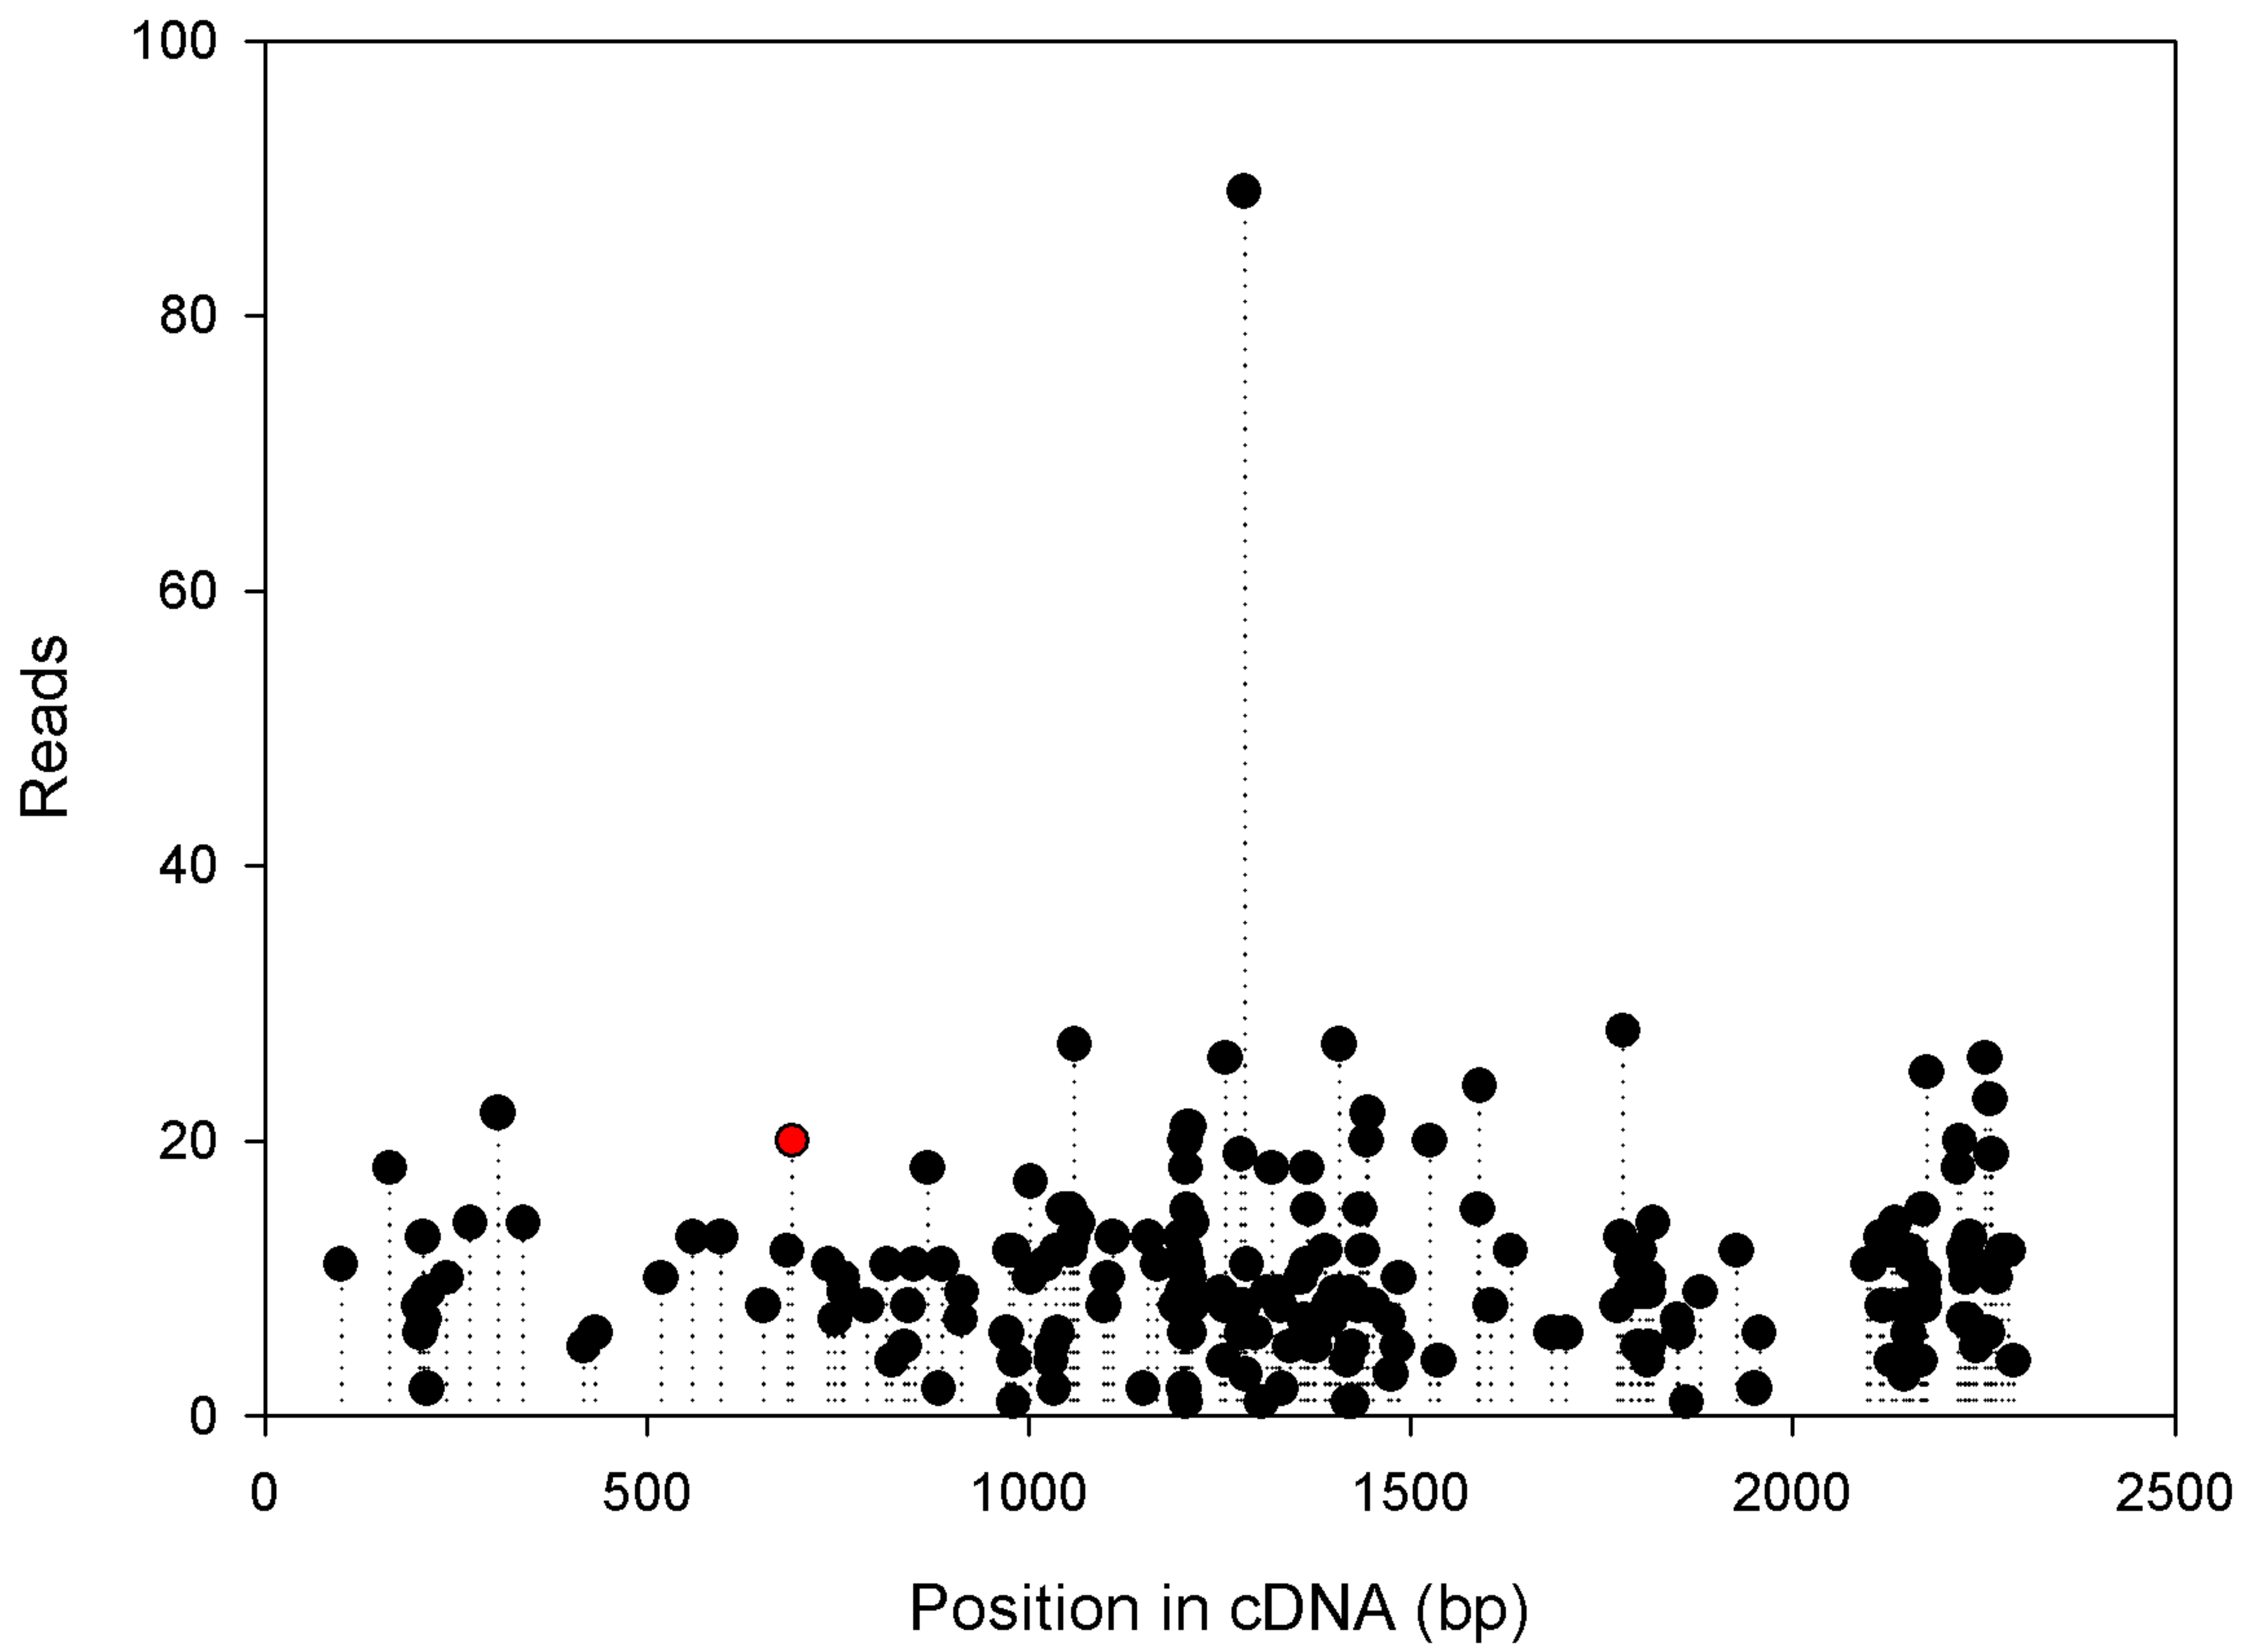

```

5' GACUUCUAU-UUCCAAAUGUACUAUGA 3'
   :: .:: :::::::::::::: ::::
3' ---AACGUAGAAGGUUUACAGGAU--- 5'
  
```

Orange1.1t01632.1

Csi-miRN20-Cs3g05320.1-65

**T-plots for targets of  
secondary siRNAs  
in flower**

Csi-miR3954a-Cs1g09635.1-5, target=Cs1g01010.1 gene=Cs1g01010  
 Category:3  
 Score:5  
 Cleavage site:1809

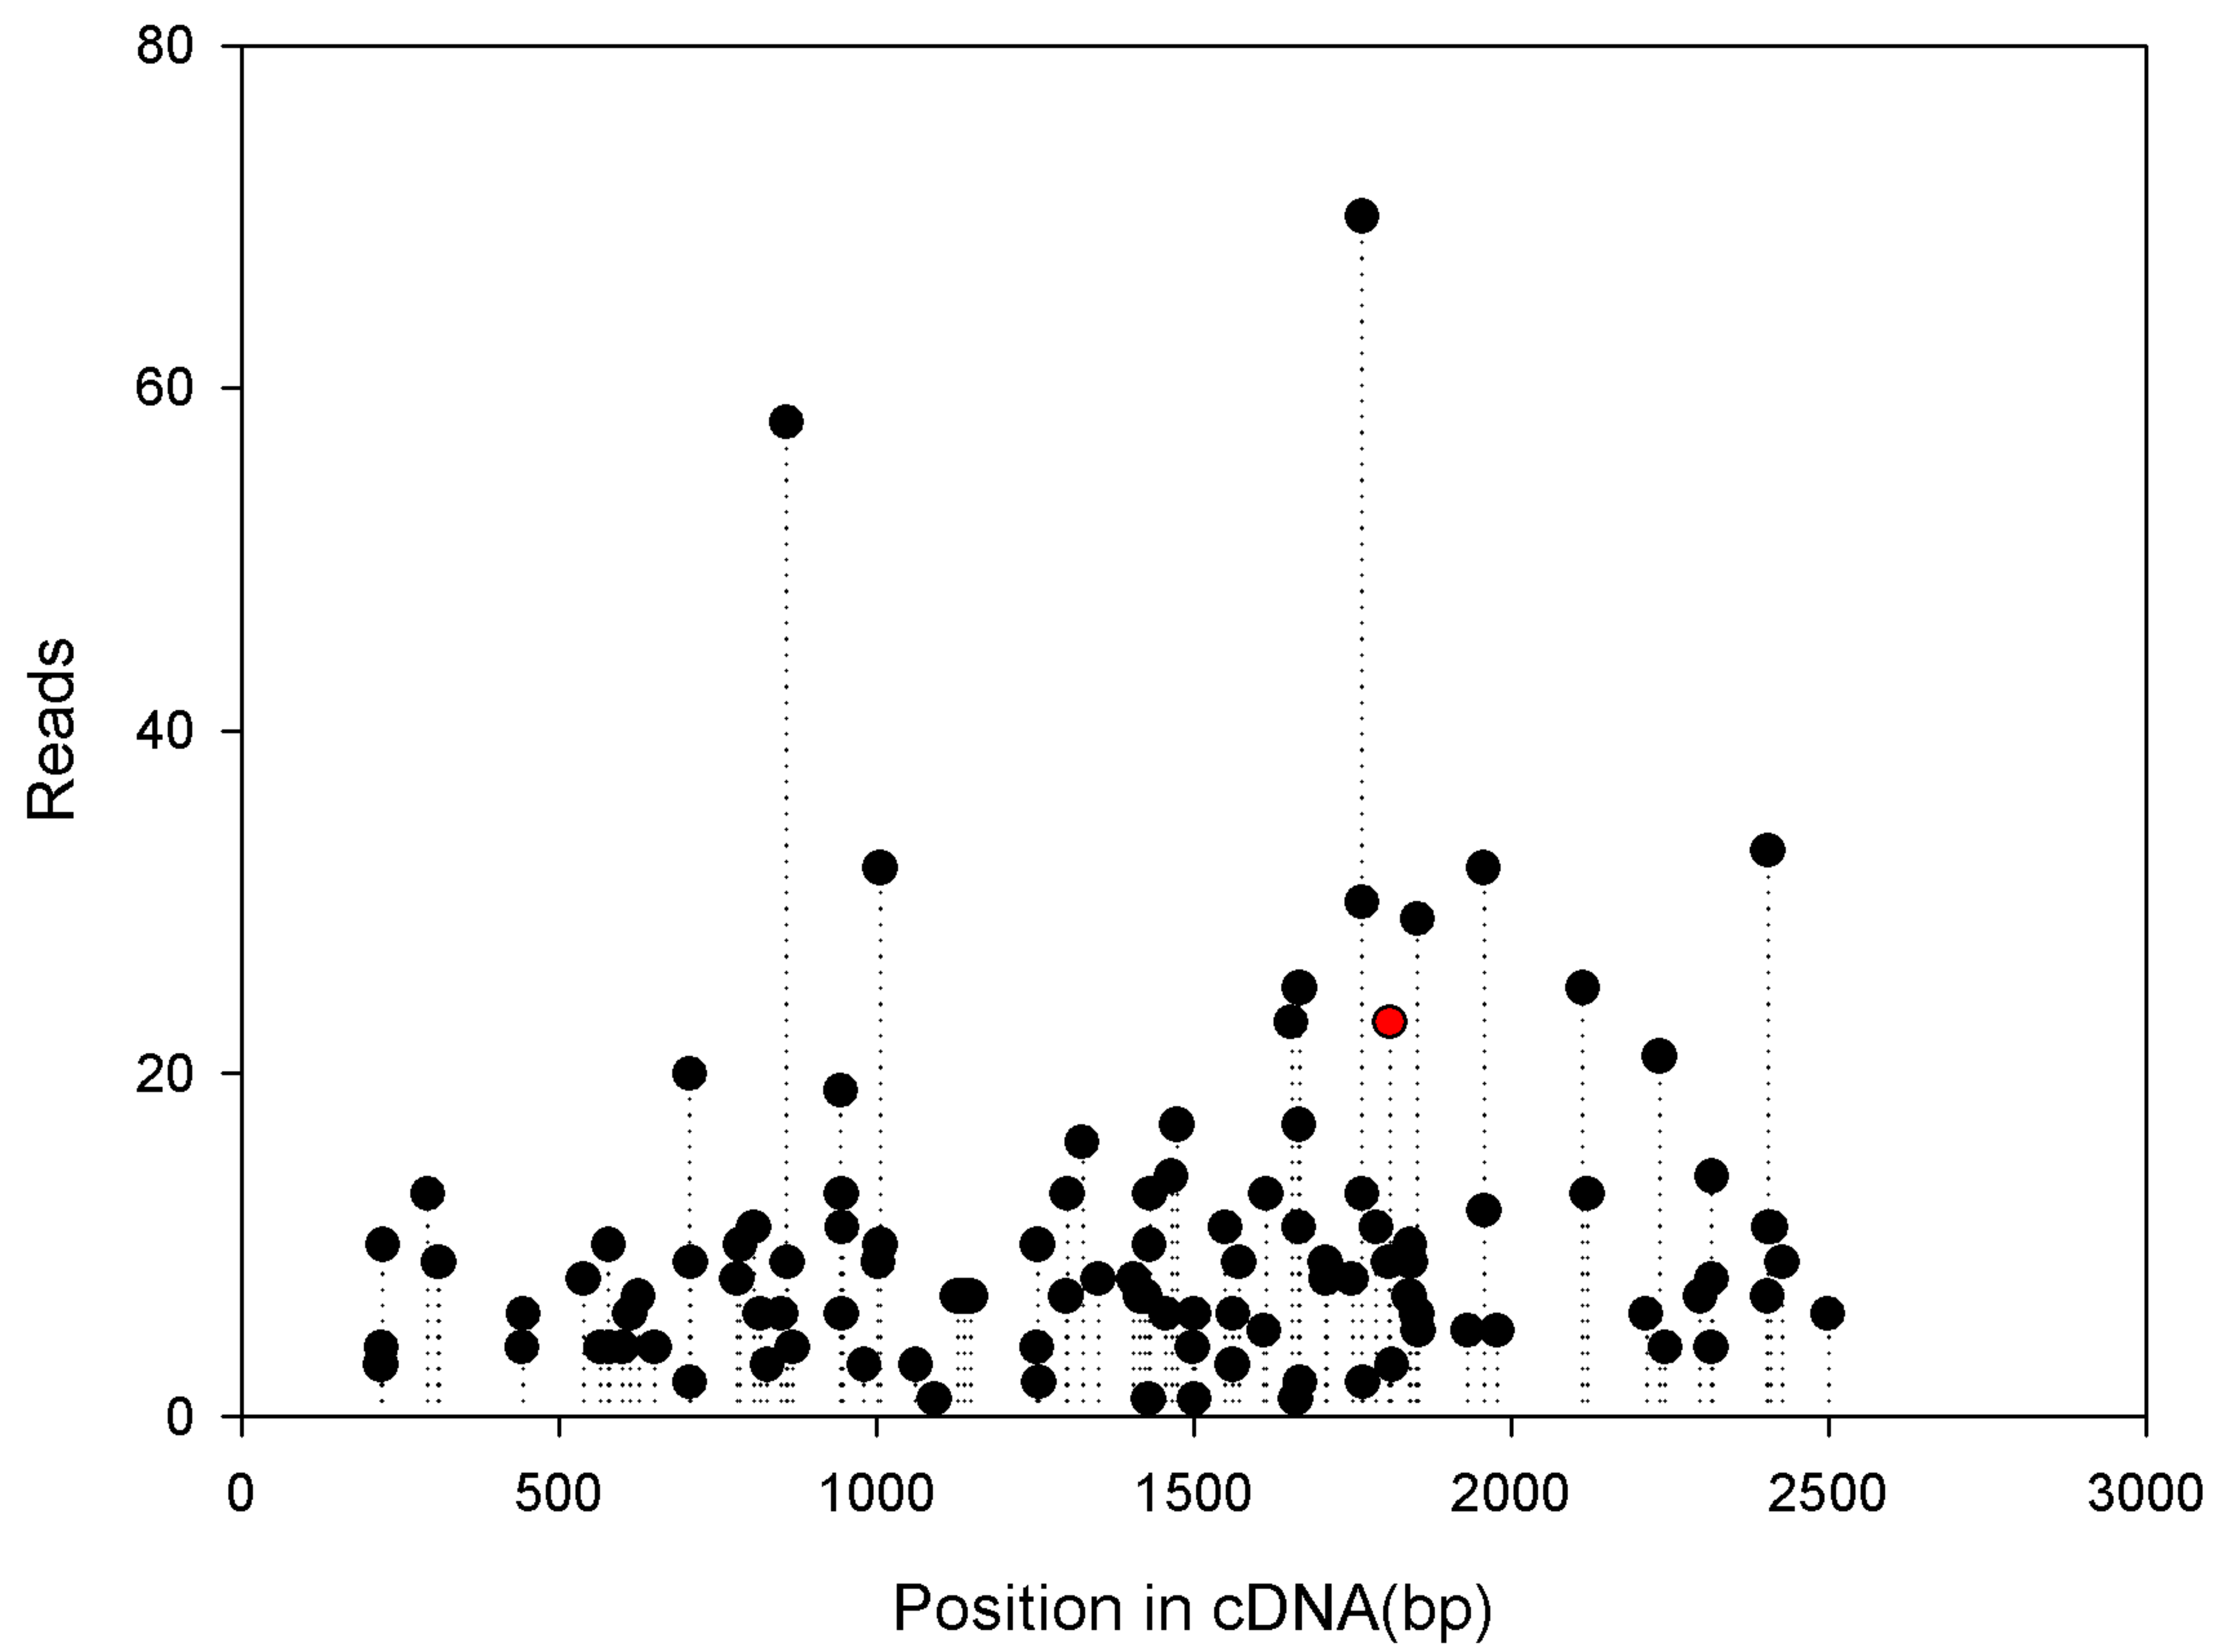

```
5' GAAGAUCUGGGA-UGCAUAUAAUGUGA 3'
   .....: .....: .....:
3' -----AGACUUUAACGUACAUAUAC- 5'
```

Cs1g01010.1

Csi-miR3954a-Cs1g09635.1-5

Csi-miR3954a-Cs1g09635.1-5, target=Cs5g24790.1 gene=Cs5g24790  
 Category:2  
 Score:5  
 Cleavage site:1682

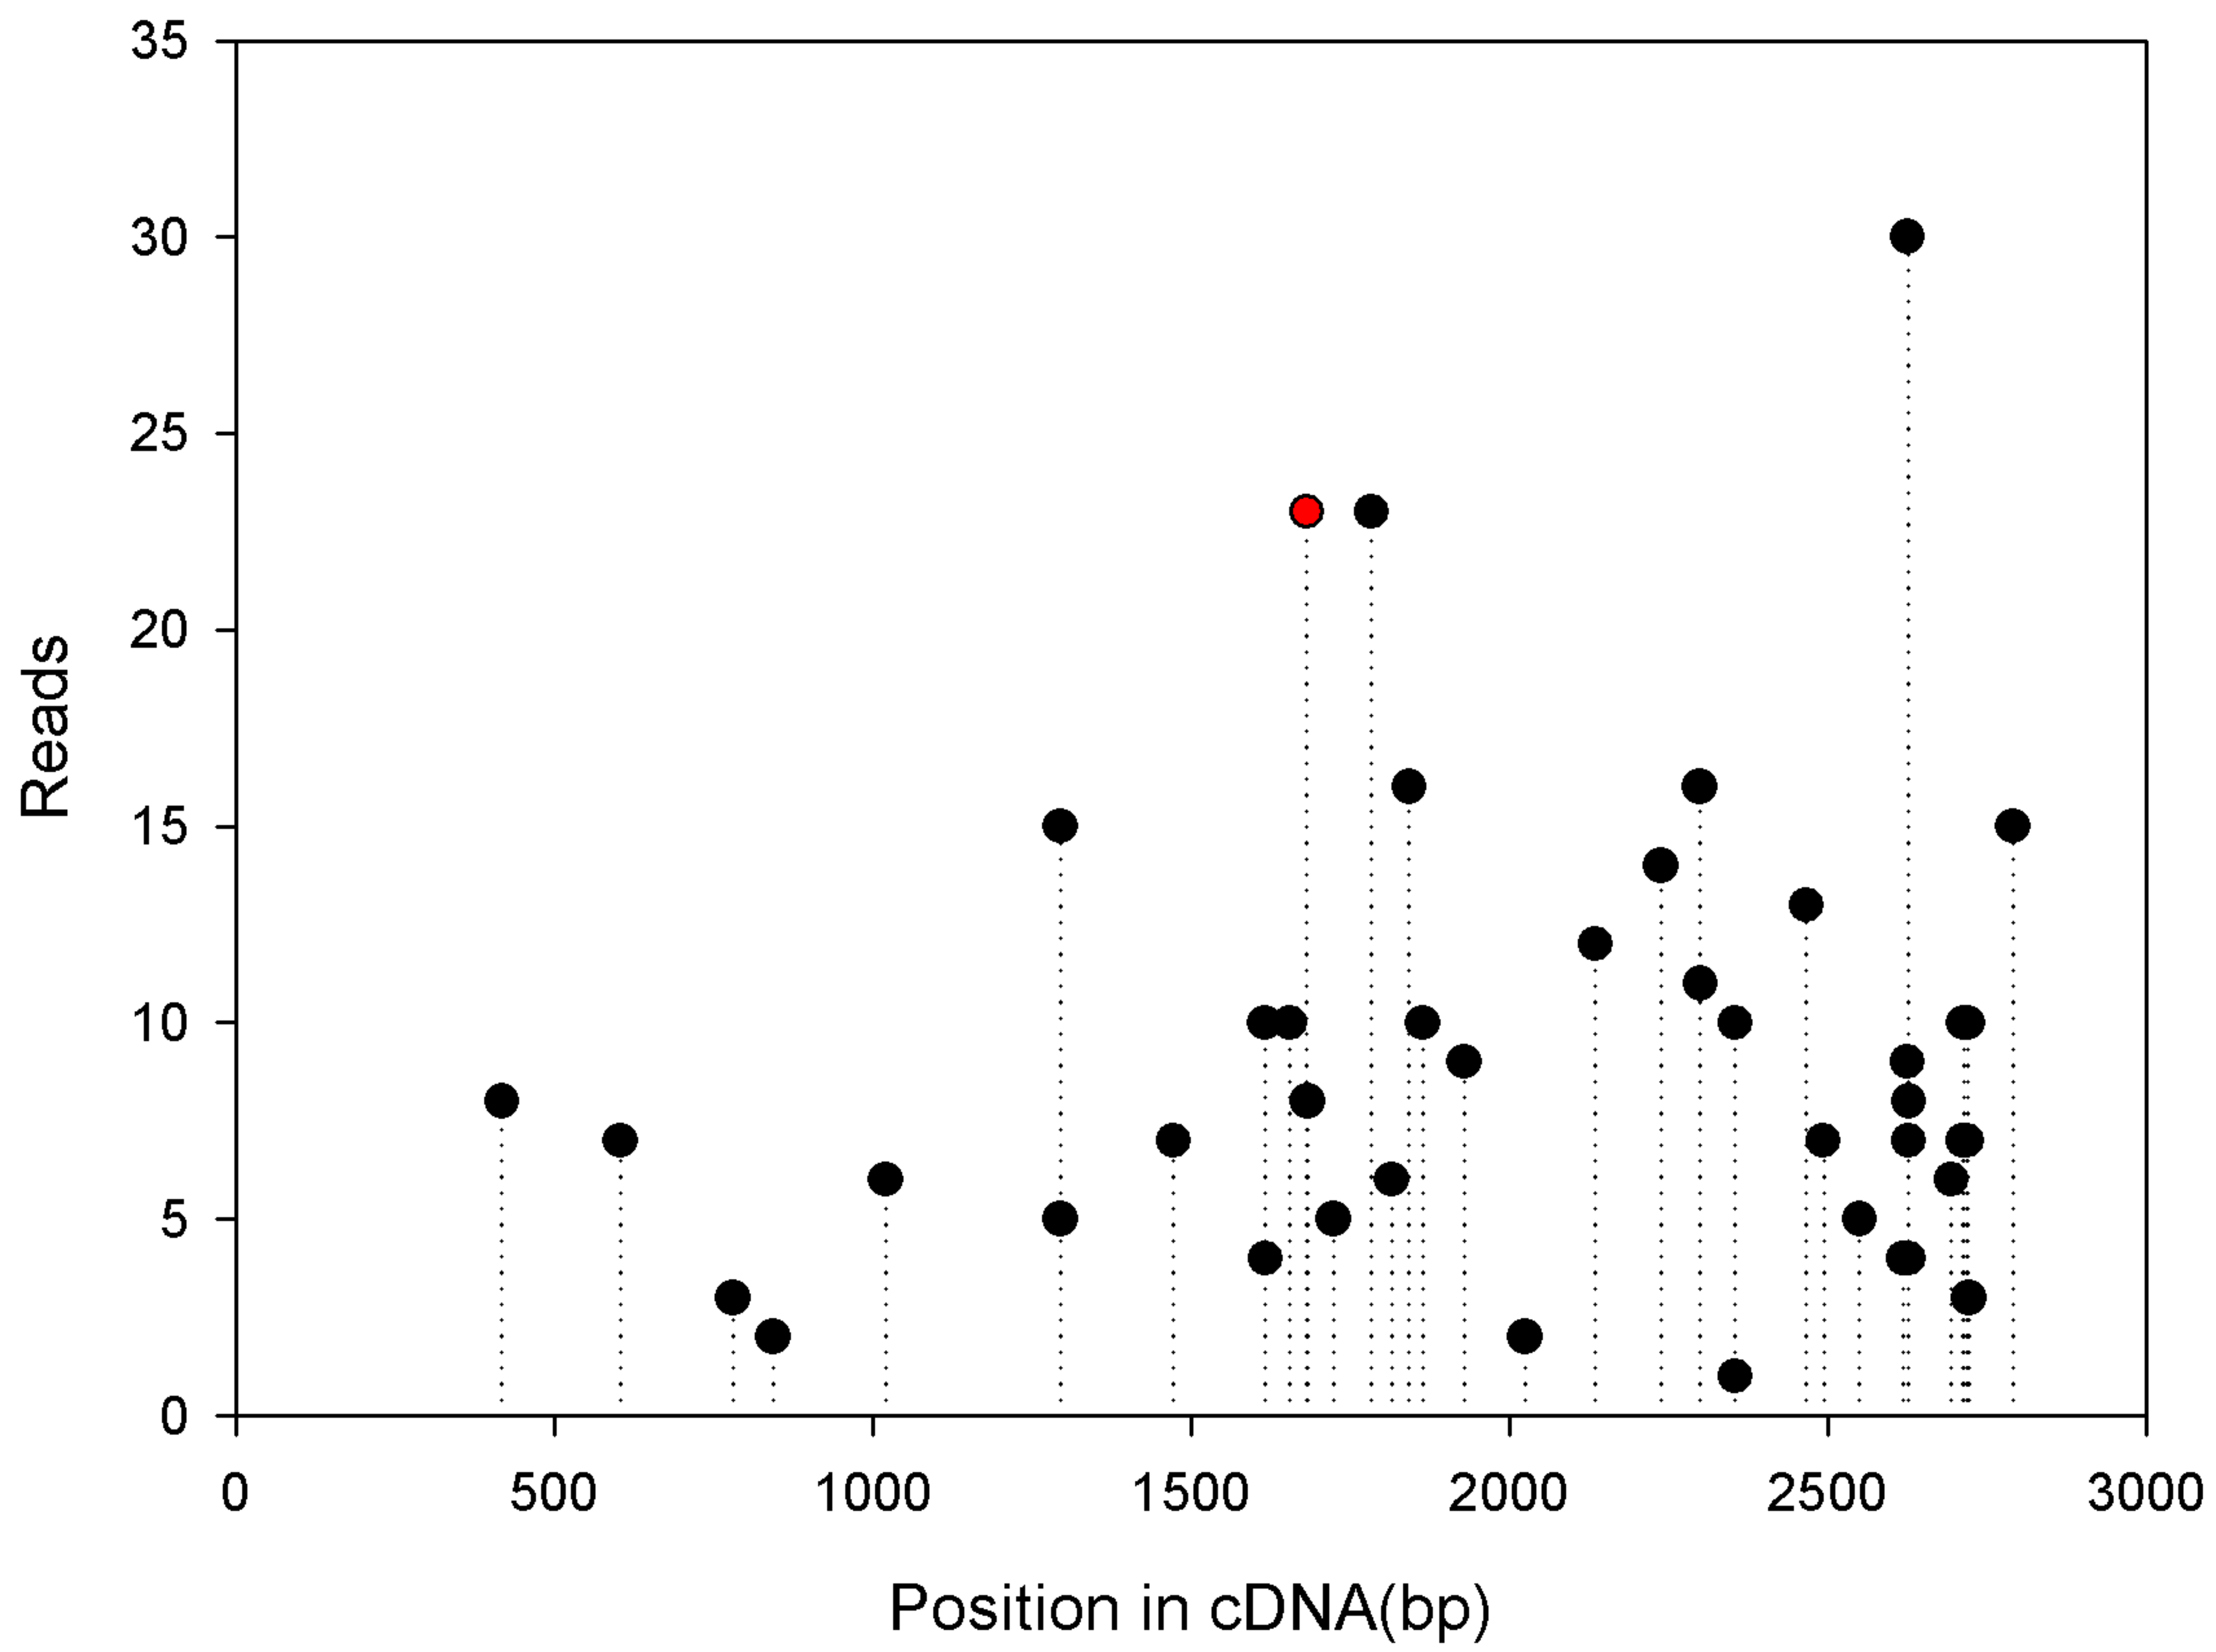

5' AGAACACAGAAAUGCAUG-AAUAUGC 3'  
 : : : : : : : : : : : : : : : :  
 3' -----AGACUUUAACGUACAUAUAC- 5'

Cs5g24790.1  
 Csi-miR3954a-Cs1g09635.1-5



Csi-miR3954a-Cs1g09635.1-5, target=Orange1.1t03220.1 gene=Orange1.1t03220  
Category:3  
Score:5  
Cleavage site:1781

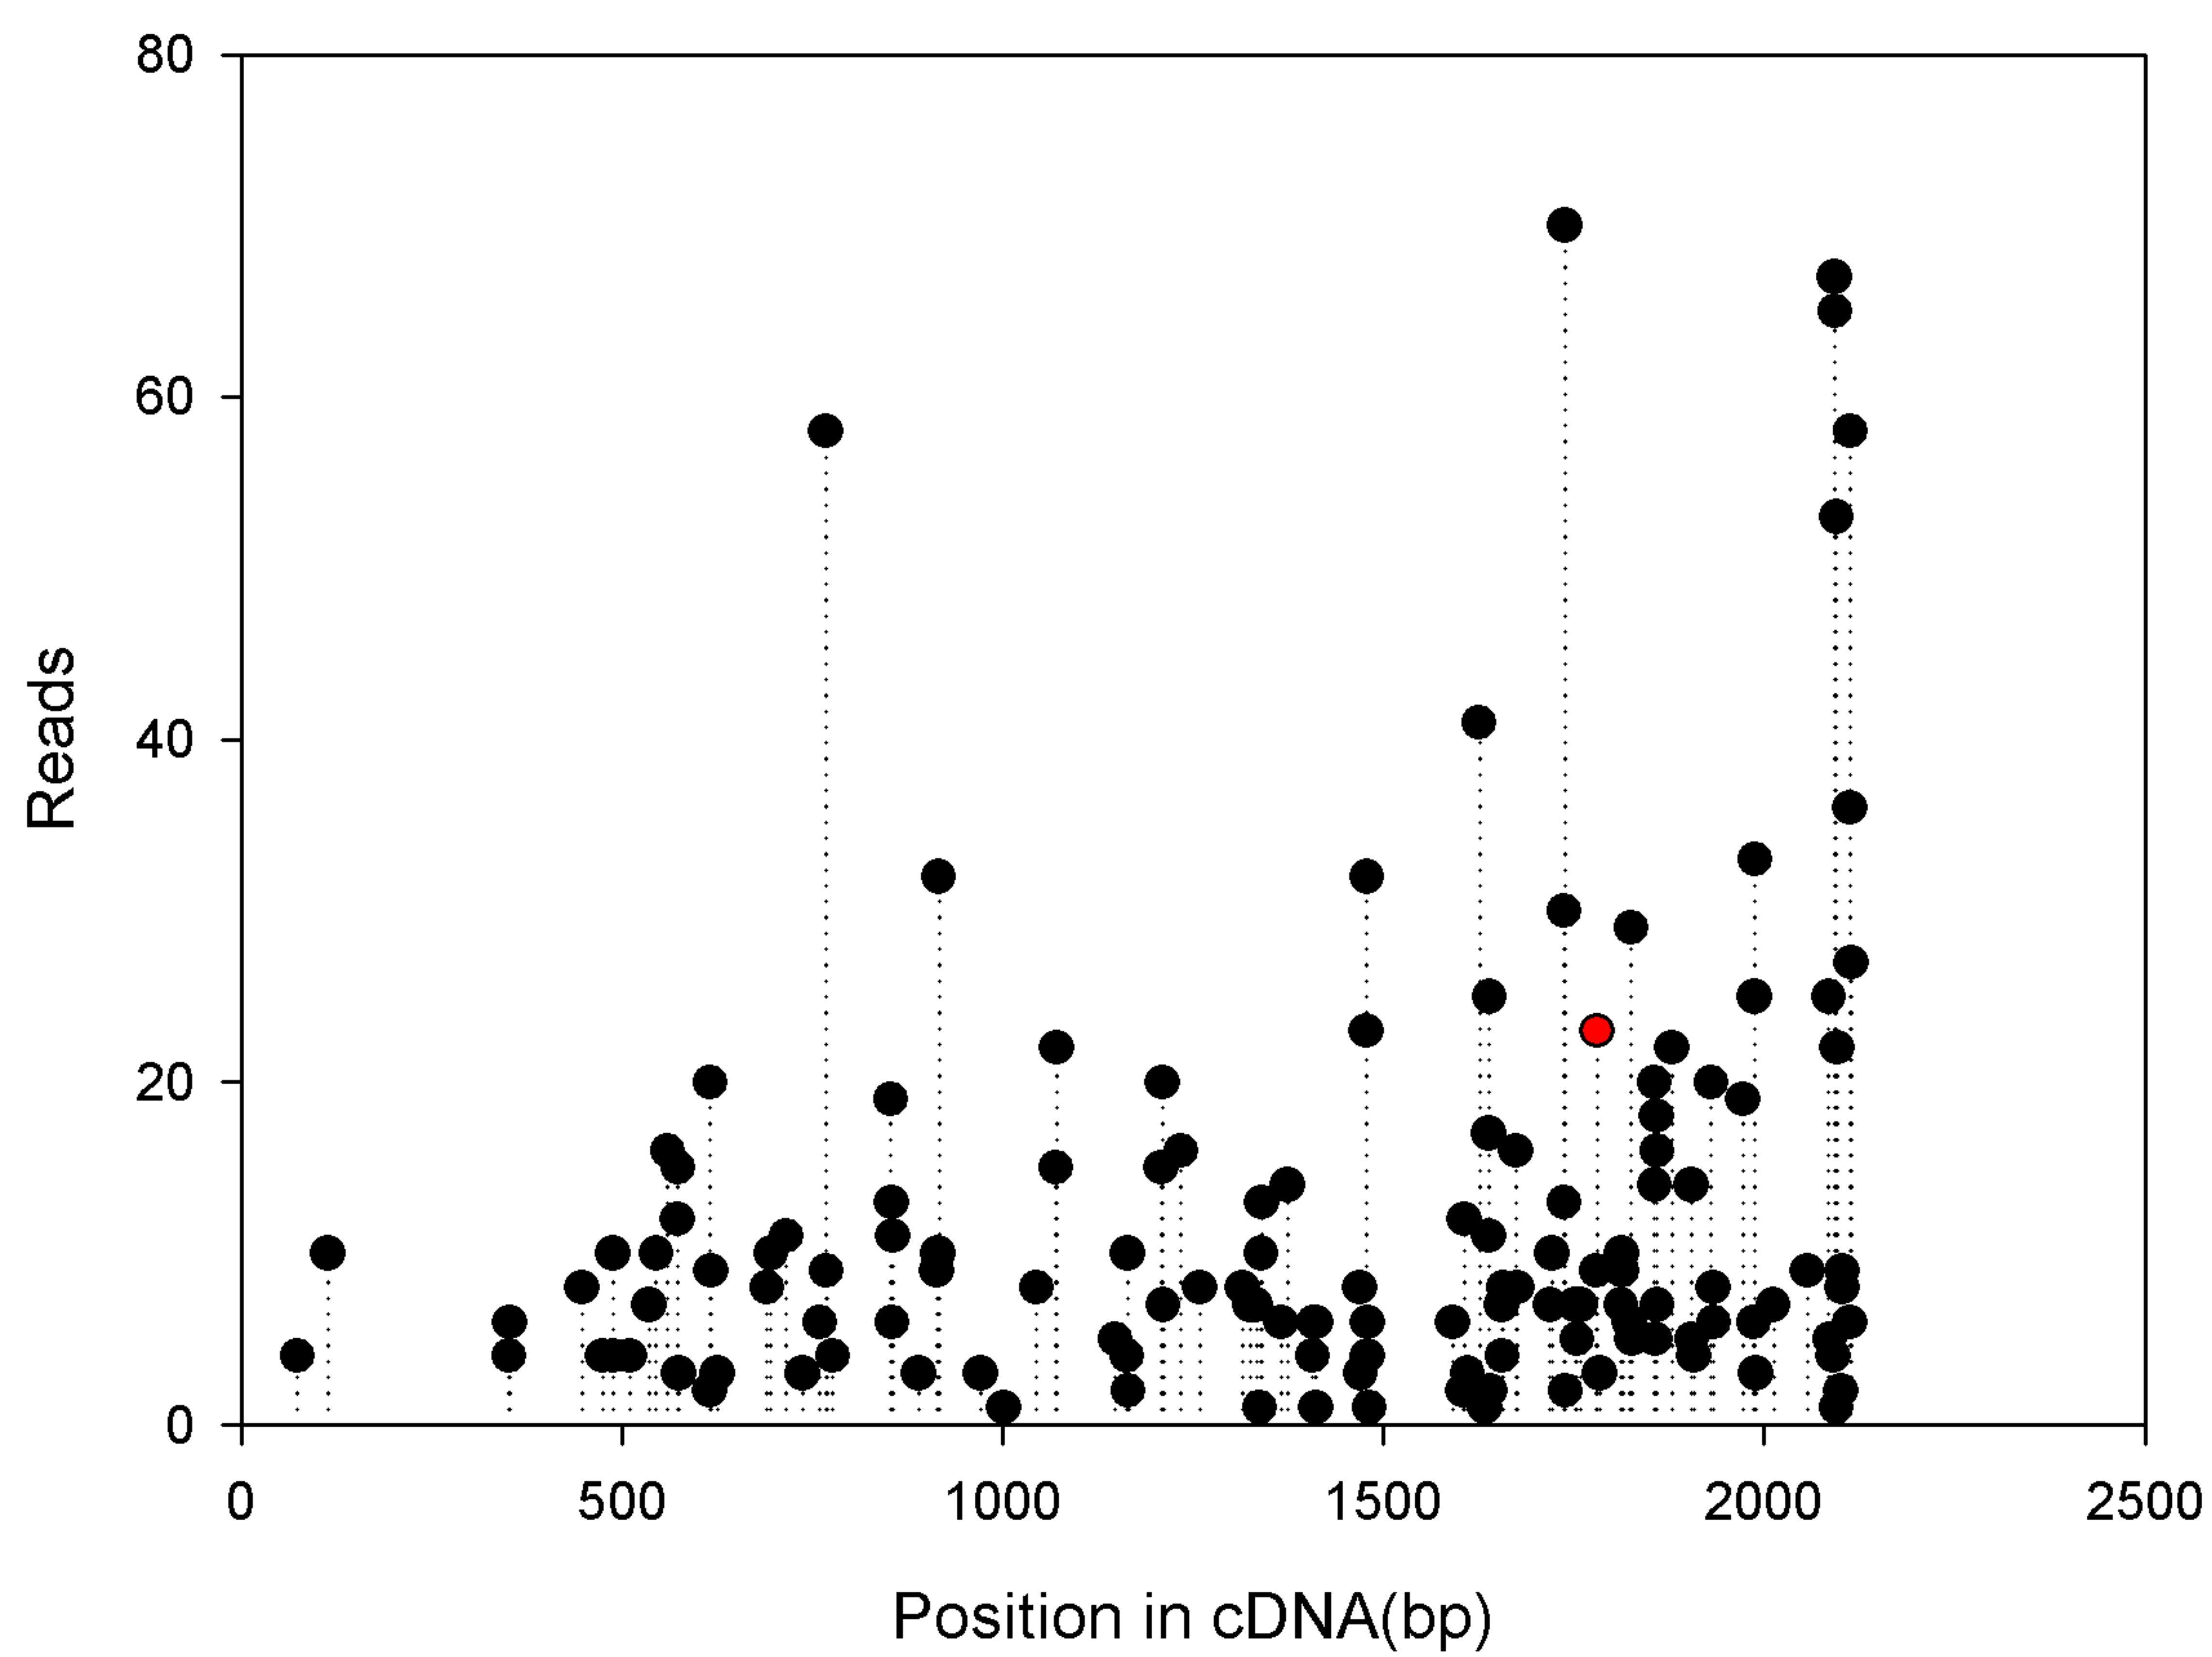

5' GAAGAUCUGGGA-UGCAUAUAAUGUGA 3'  
      :::..: :::: ::::..:  
3' -----AGACUUUAACGUACAUUAUAC- 5'

Orange1.1t03220.1

Csi-miR3954a-Cs1g09635.1-5

Csi-miR3954a-Cs1g09635.1-7, target=Cs4g11930.1 gene=Cs4g11930

Category:3

Score:3.5

Cleavage site:506

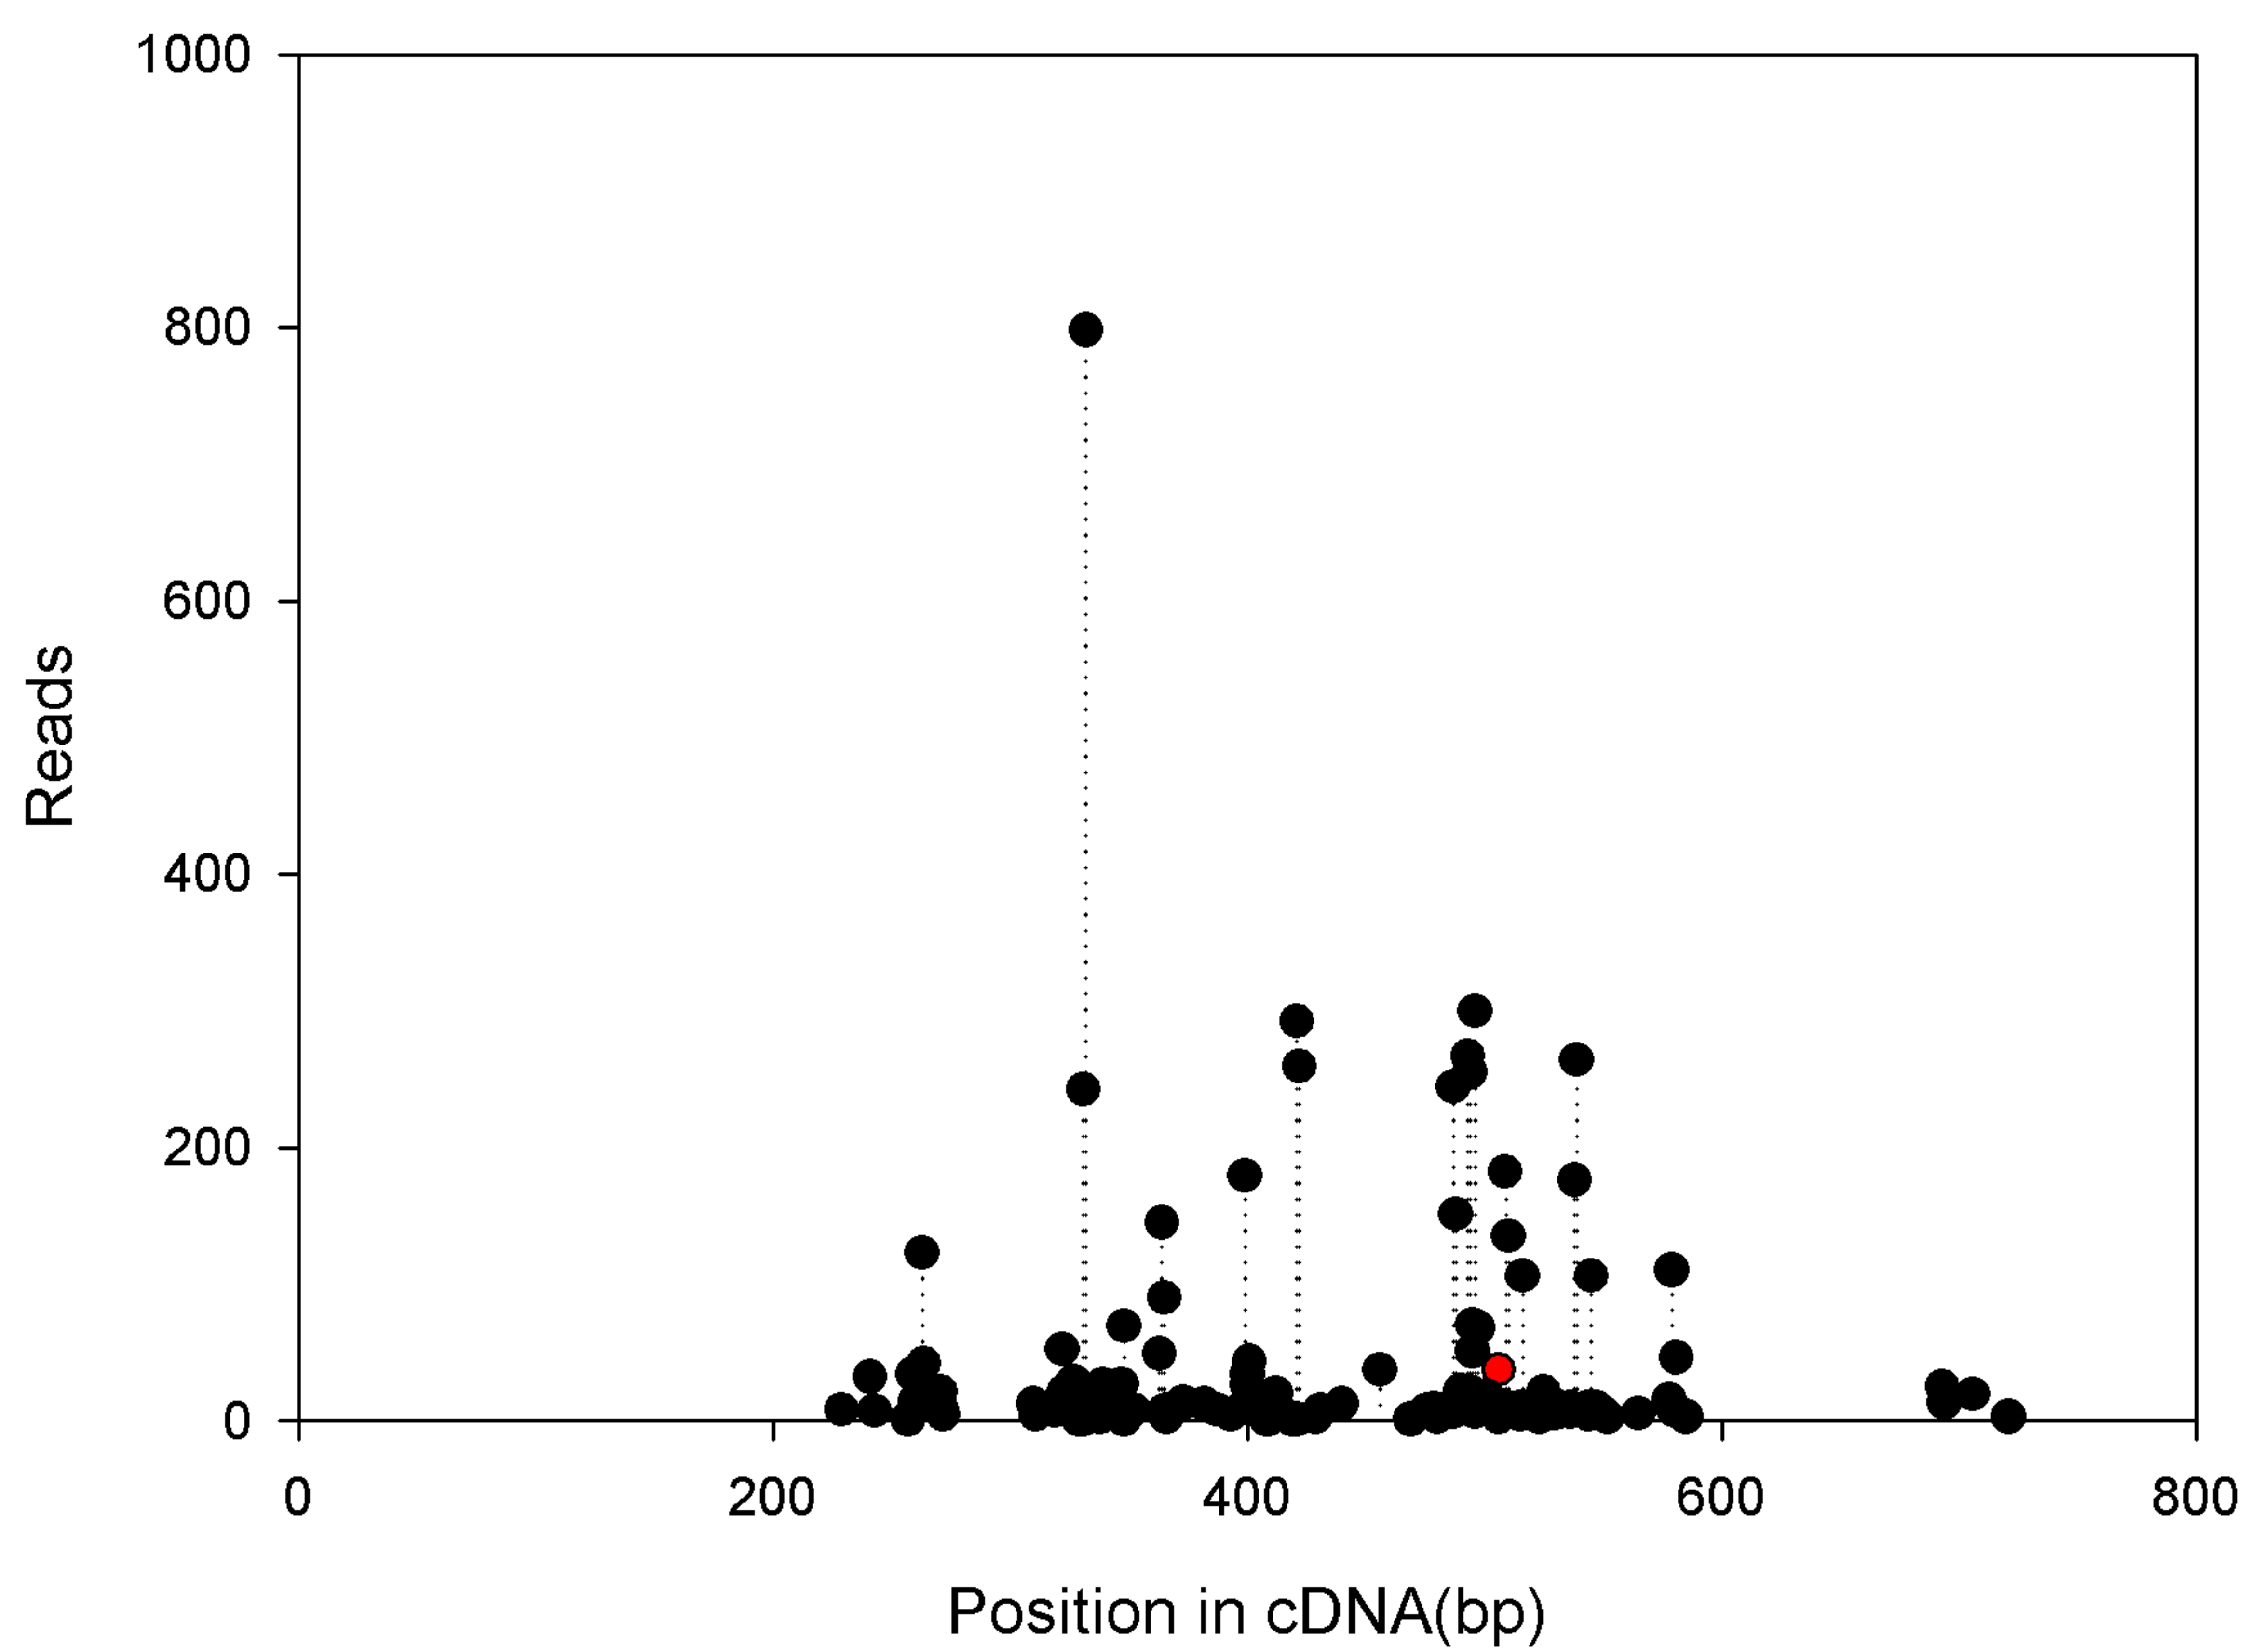

5' UCCUGAGGUUUGACCUUUGAGAAUGU 3'

Cs4g11930.1

.....

3' --GACUCCAGGCUGGAAAGUCUU--- 5'

Csi-miR3954a-Cs1g09635.1-7

Csi-miR3954a-Cs1g09635.1-7, target=Cs9g18330.1 gene=Cs9g18330

Category:2

Score:5

Cleavage site:897

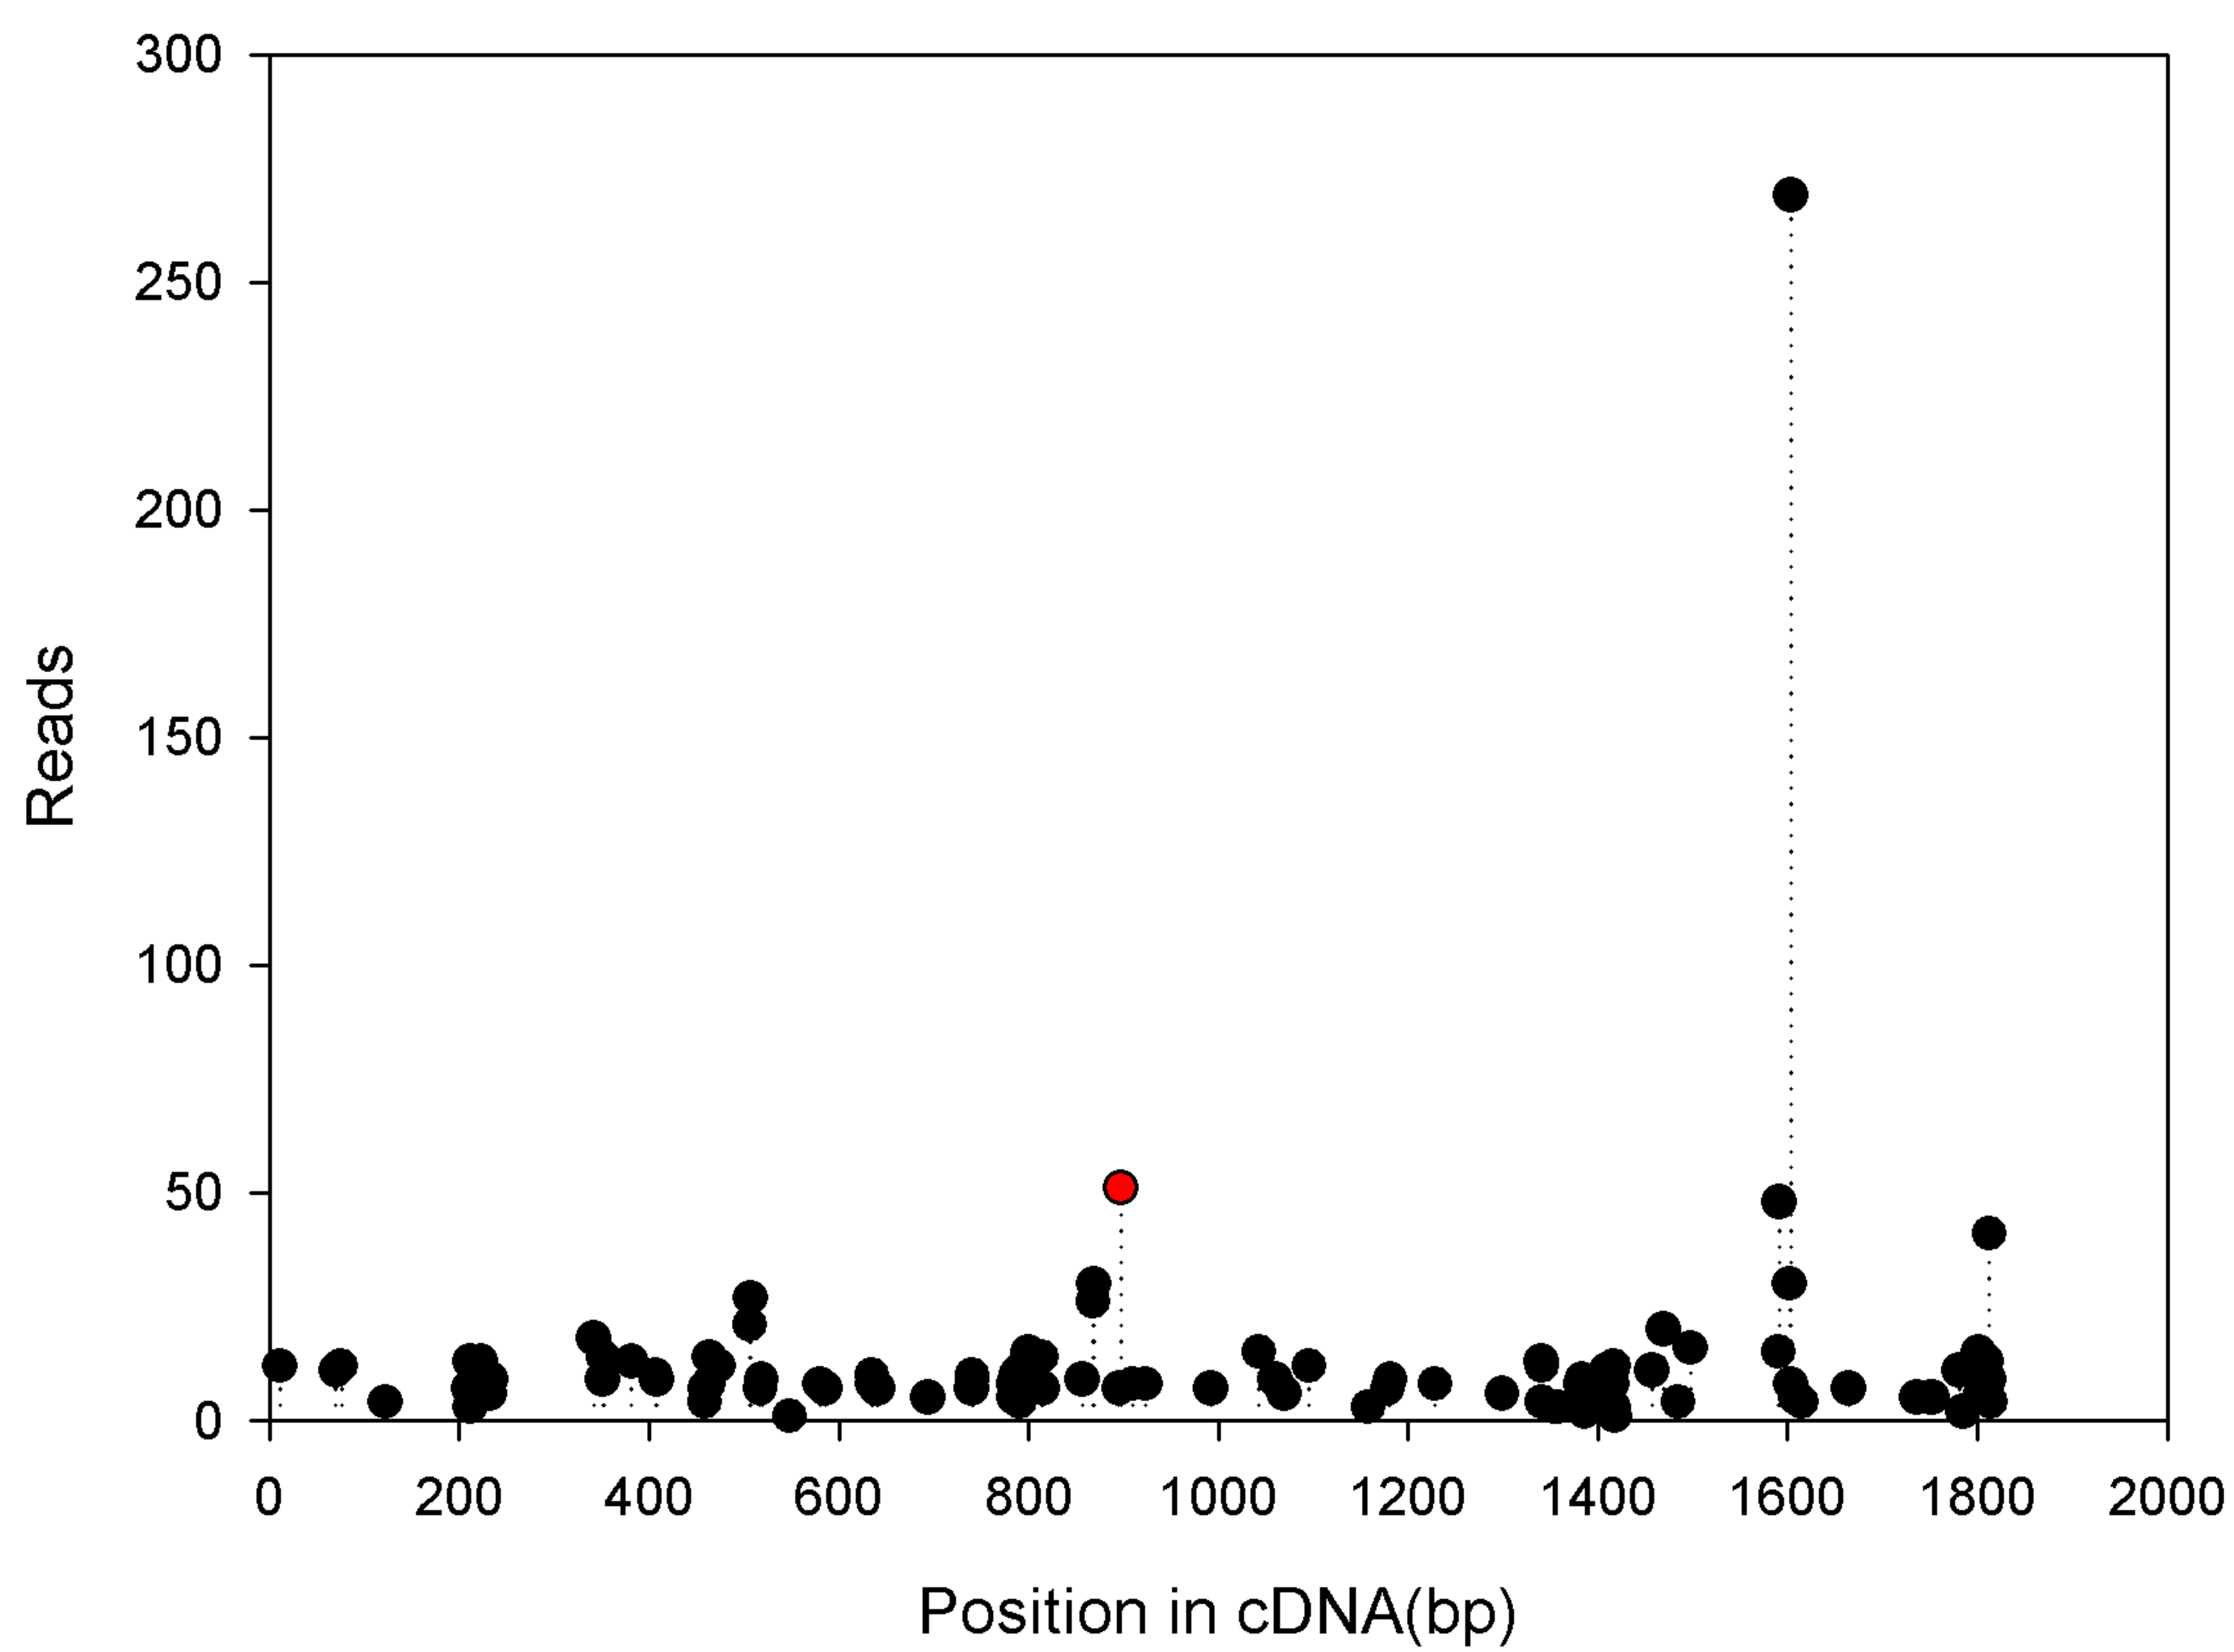

5' AGACUGAUGU-CGACUUUUUGGAAUCU 3'

Cs9g18330.1

.....

3' ---GACUCCAGGCUGGAAAGUCUU--- 5'

Csi-miR3954a-Cs1g09635.1-7



Csi-miR3954a-Cs1g09635.1-9, target=Cs2g17600.1 gene=Cs2g17600  
 Category:2  
 Score:4  
 Cleavage site:1815

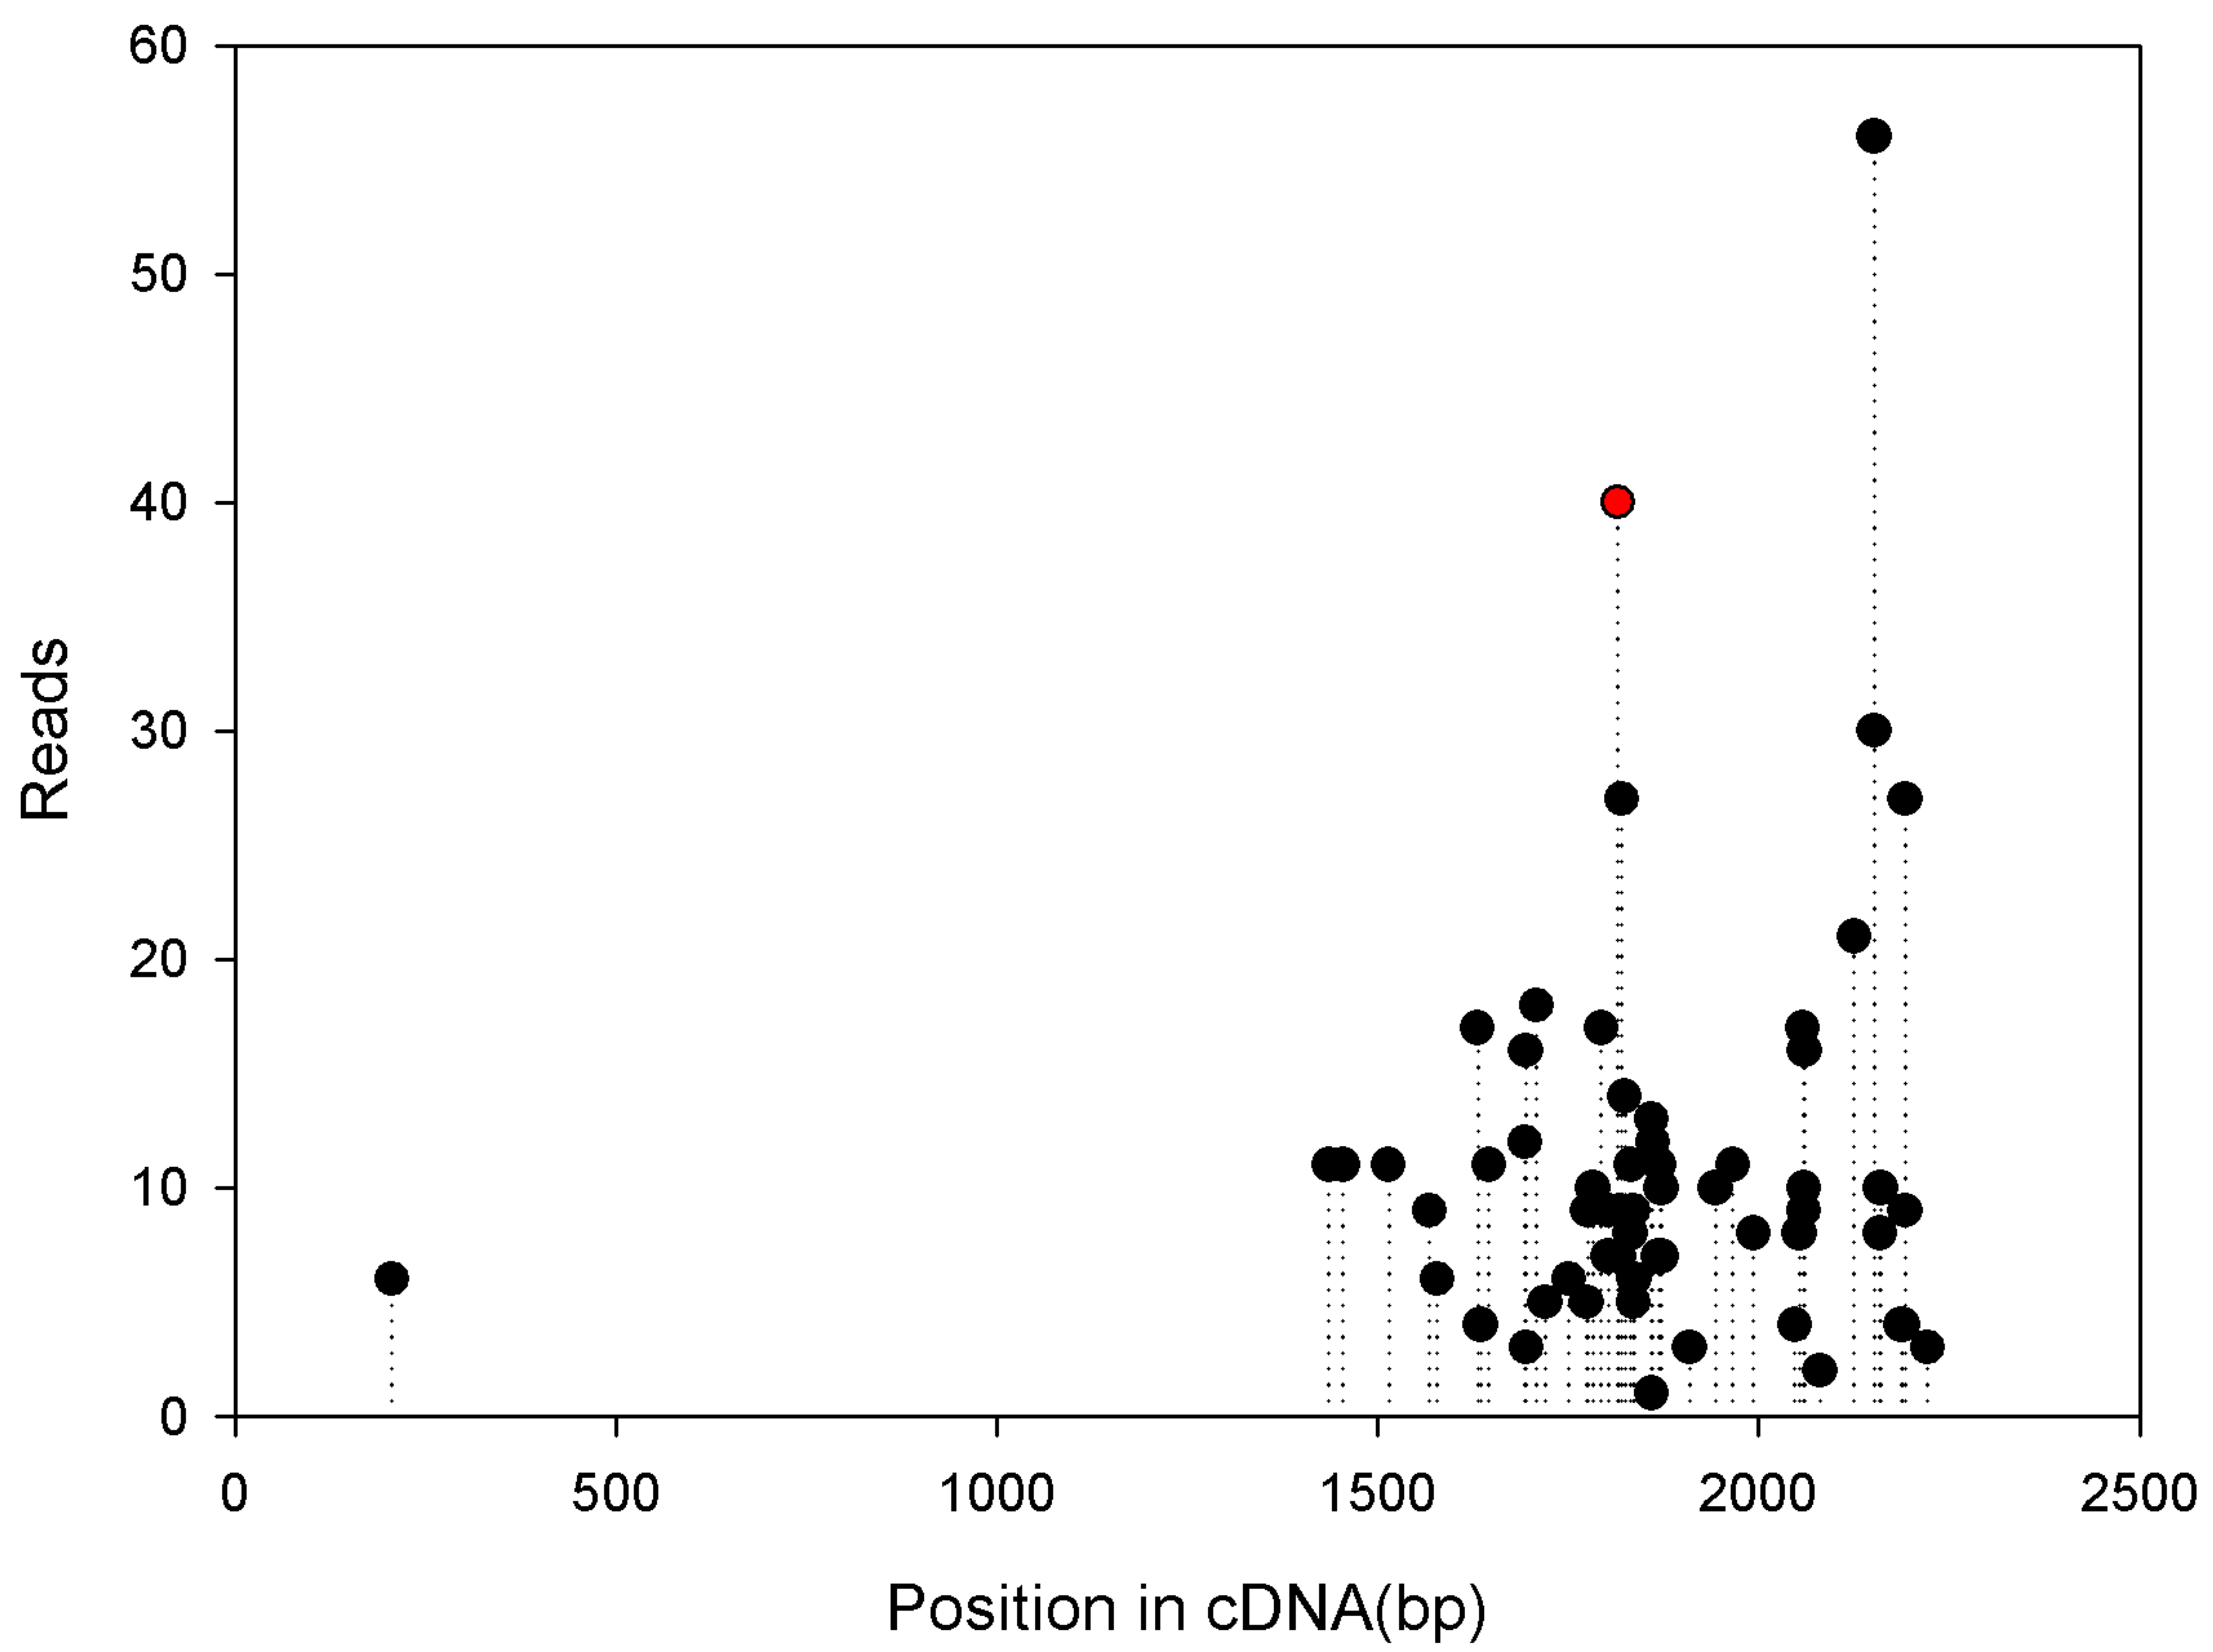

|    |                            |                   |                            |             |
|----|----------------------------|-------------------|----------------------------|-------------|
| 5' | CGAUGAUGC                  | UAUCACAAAGGCA     | 3'                         | Cs2g17600.1 |
|    | : : : : :                  | : : : : : : : : : |                            |             |
| 3' | -----AAGAUAGUUUAGUGUUUCCGU | 5'                | Csi-miR3954a-Cs1g09635.1-9 |             |

Csi-miR3954a-Cs1g09635.1-9, target=Cs5g11880.1 gene=Cs5g11880

Category:2

Score:5

Cleavage site:406

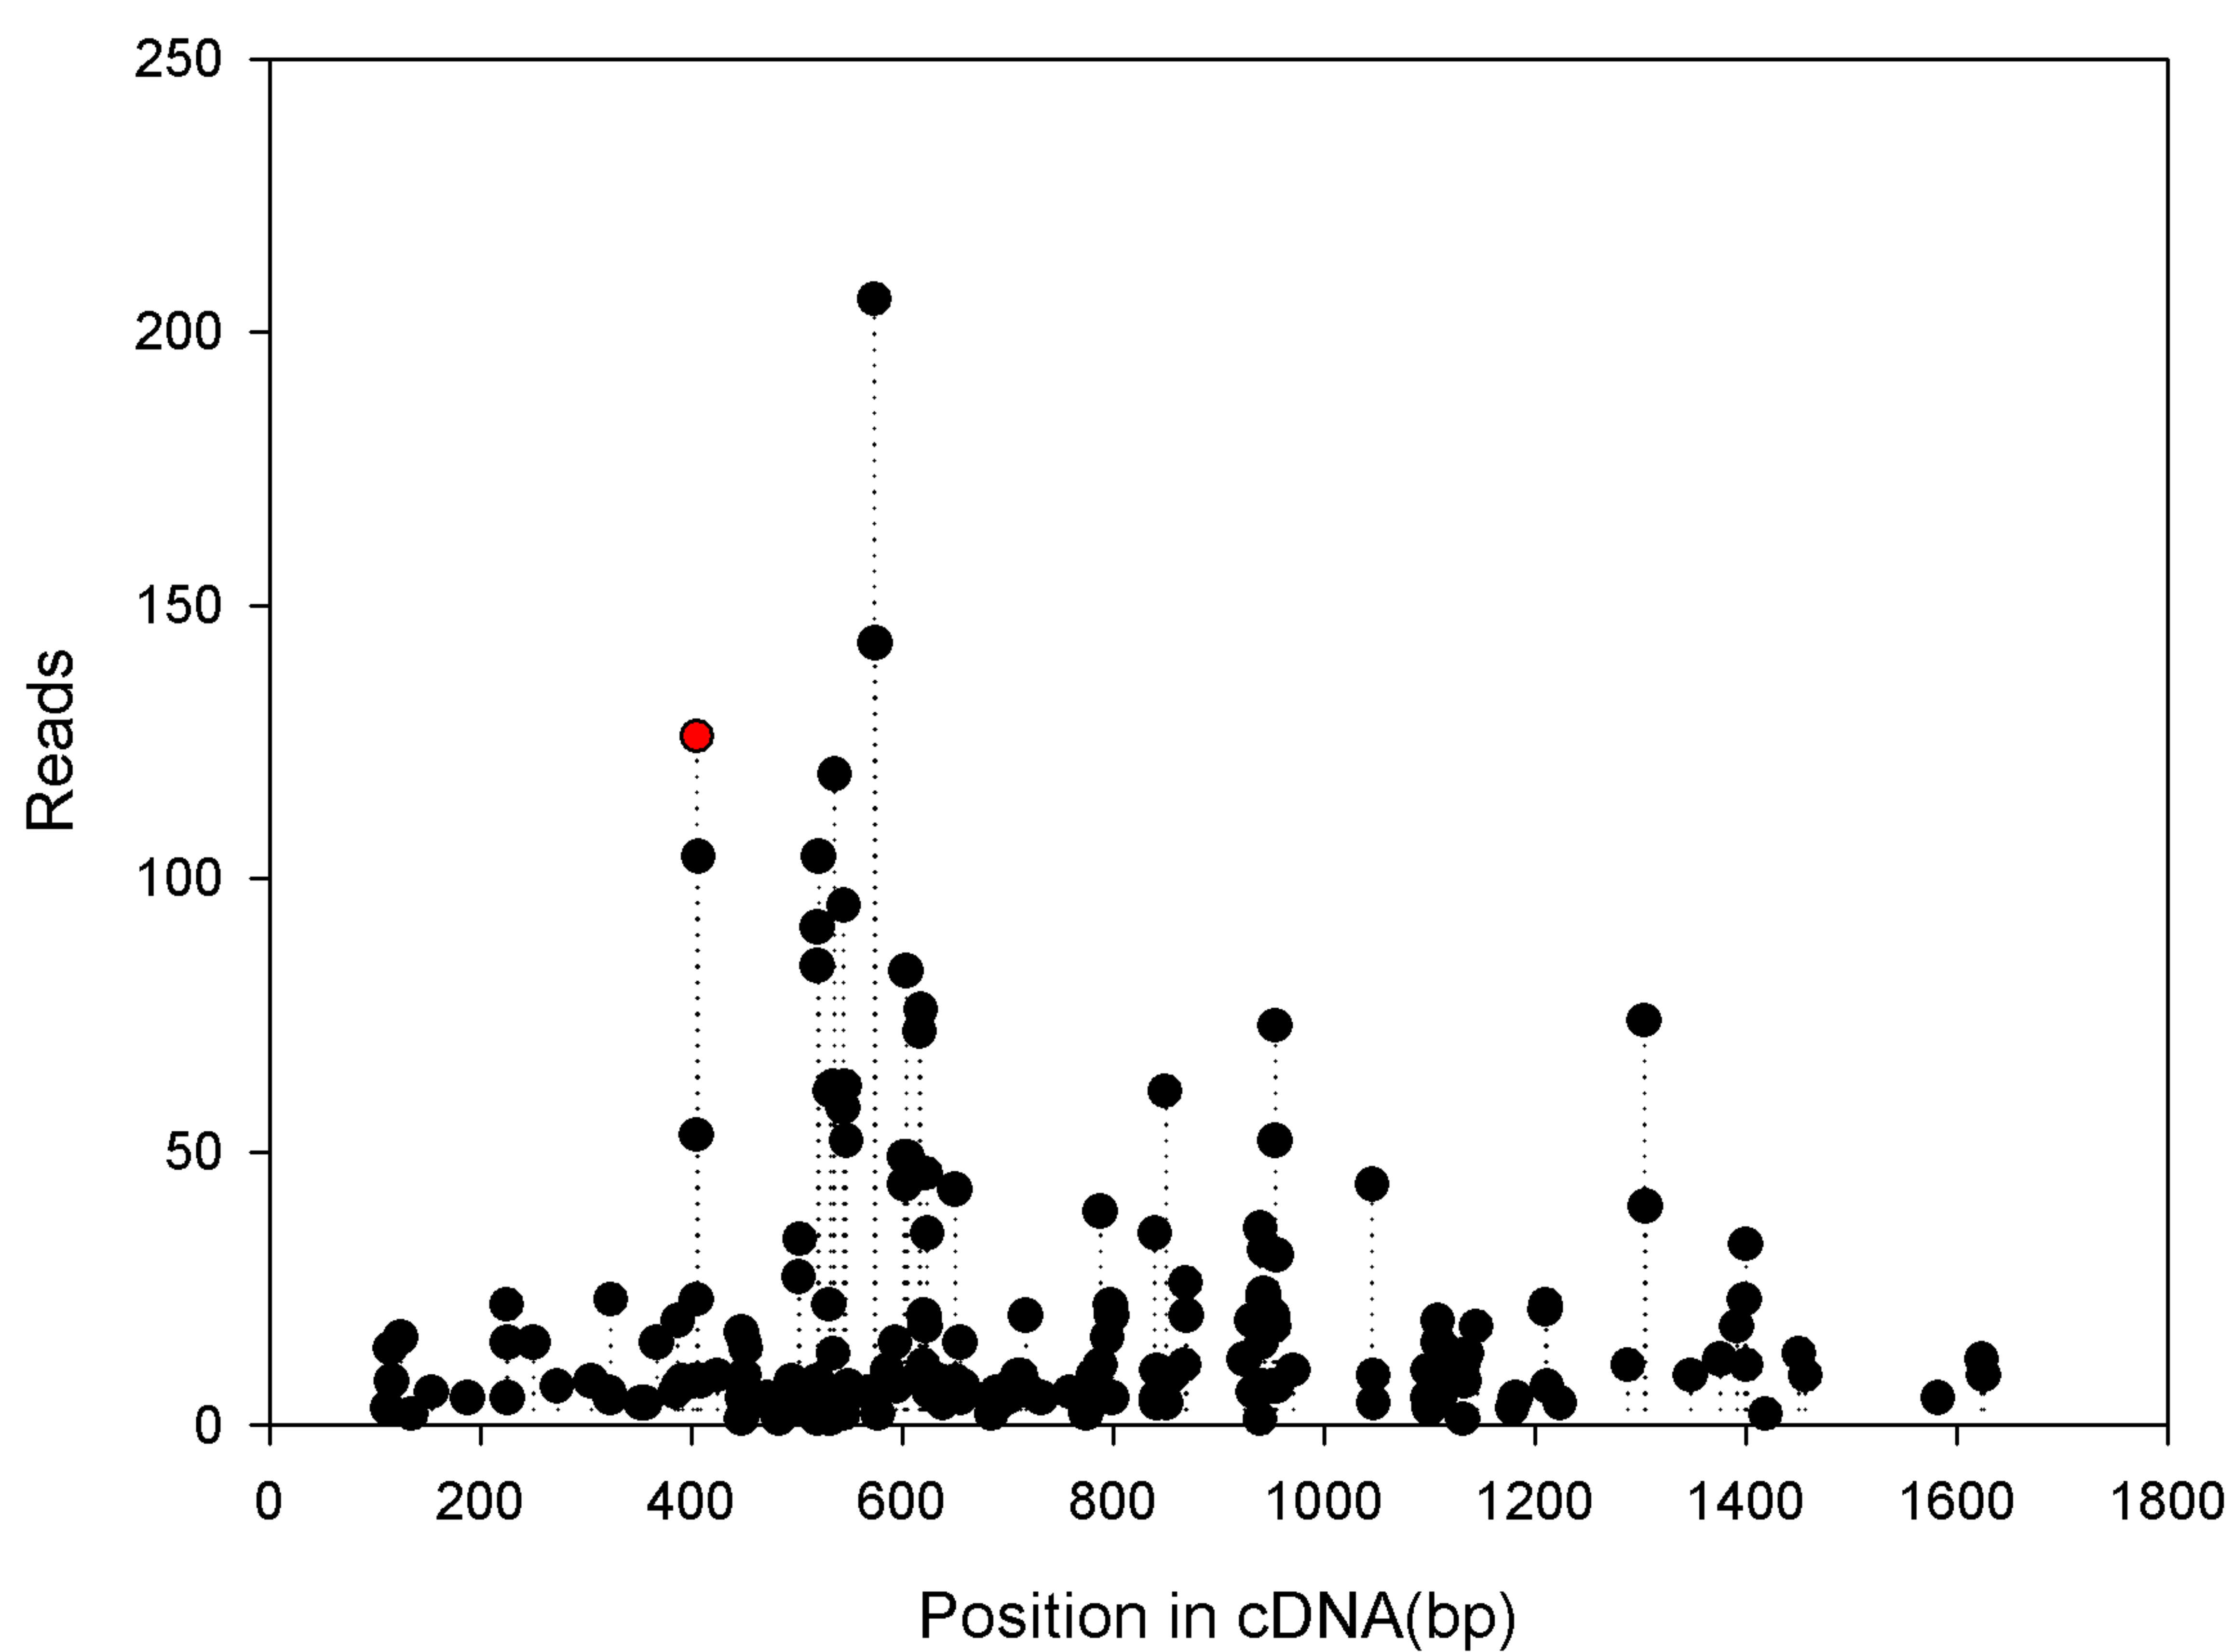

5' GAAUAUUC-AGAAA AUUACAAAGGCUA 3'

Cs5g11880.1

::: : : ::::: ::::: :::::

3' -----AAGAUAGUUUAGUGUUUCCGU- 5'

Csi-miR3954a-Cs1g09635.1-9

Csi-miR3954a-Cs5g04670.1-21, target=Cs5g09880.1 gene=Cs5g09880  
 Category:3  
 Score:3.5  
 Cleavage site:1356

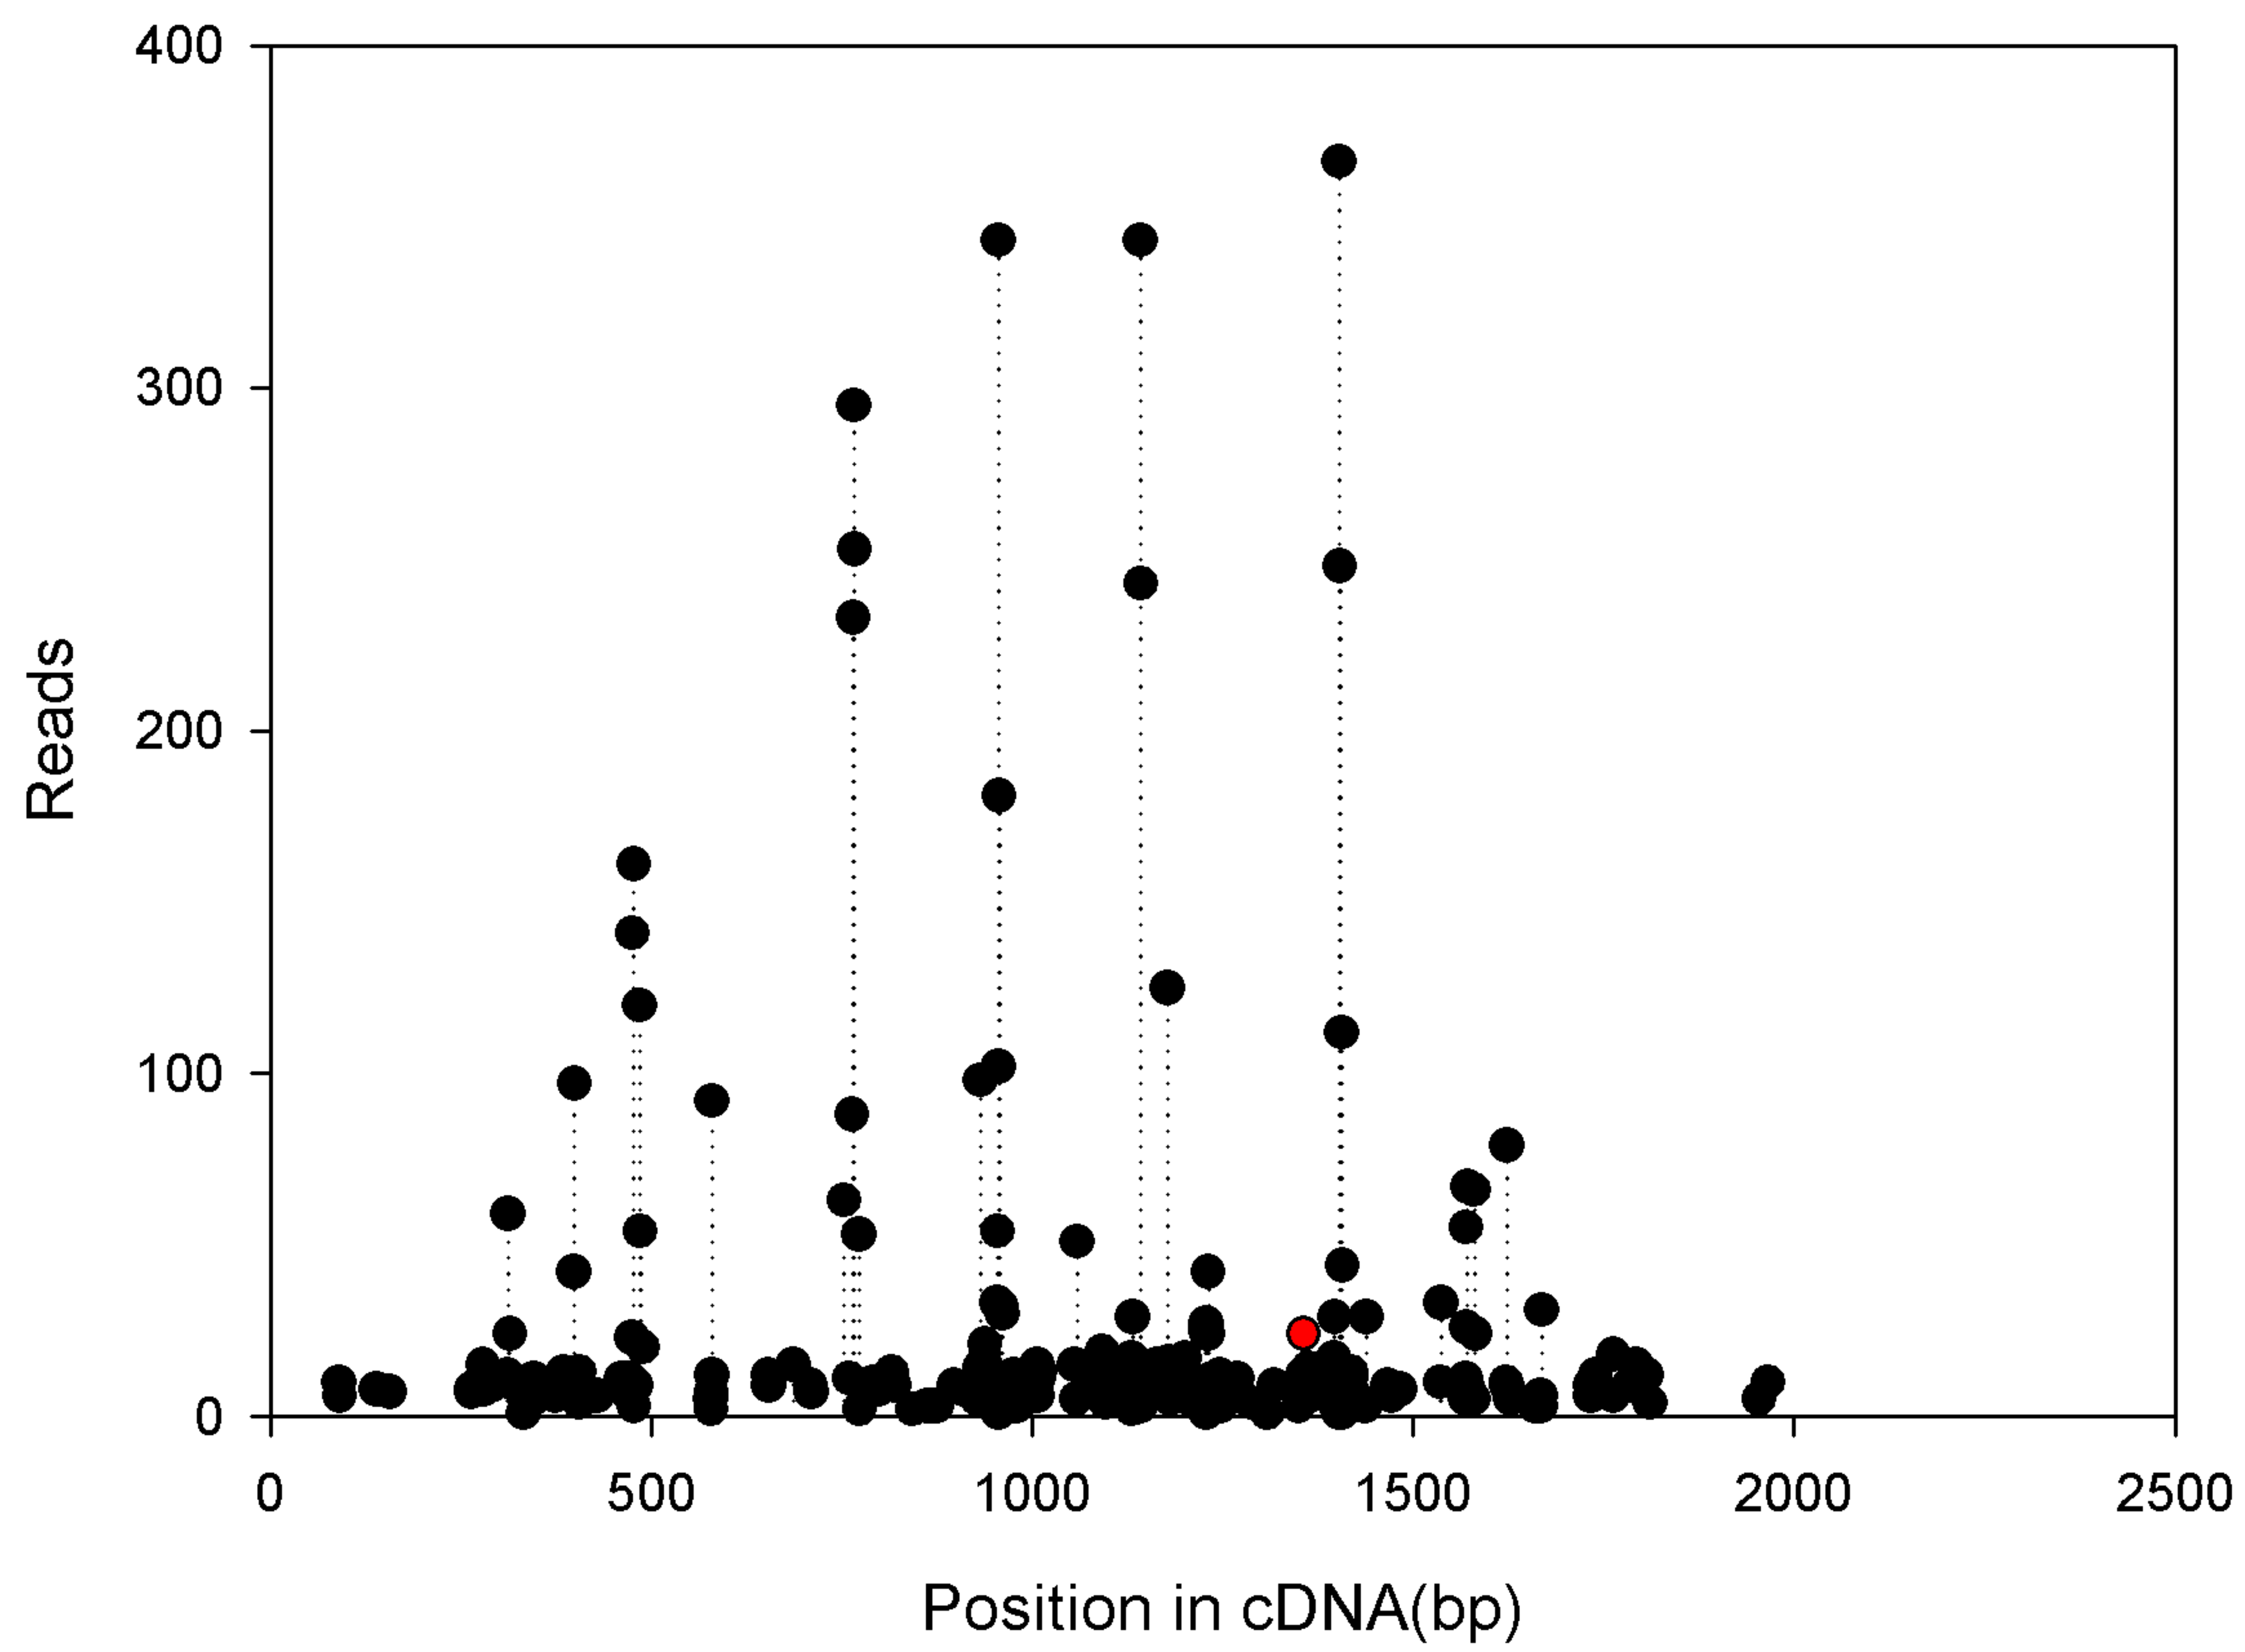

```

5' GAUUCAUGGUGCCAAAUGGUGCACAA 3'
:: :: :: :: :: :: :: :: :: ::
3' CUUAGU-CUACGGUUUACCACU---- 5'
  
```

Cs5g09880.1

Csi-miR3954a-Cs5g04670.1-21

Csi-miR482c-Cs9g06846.1-15, target=Cs1g16450.1 gene=Cs1g16450  
 Category:3  
 Score:5  
 Cleavage site:1950

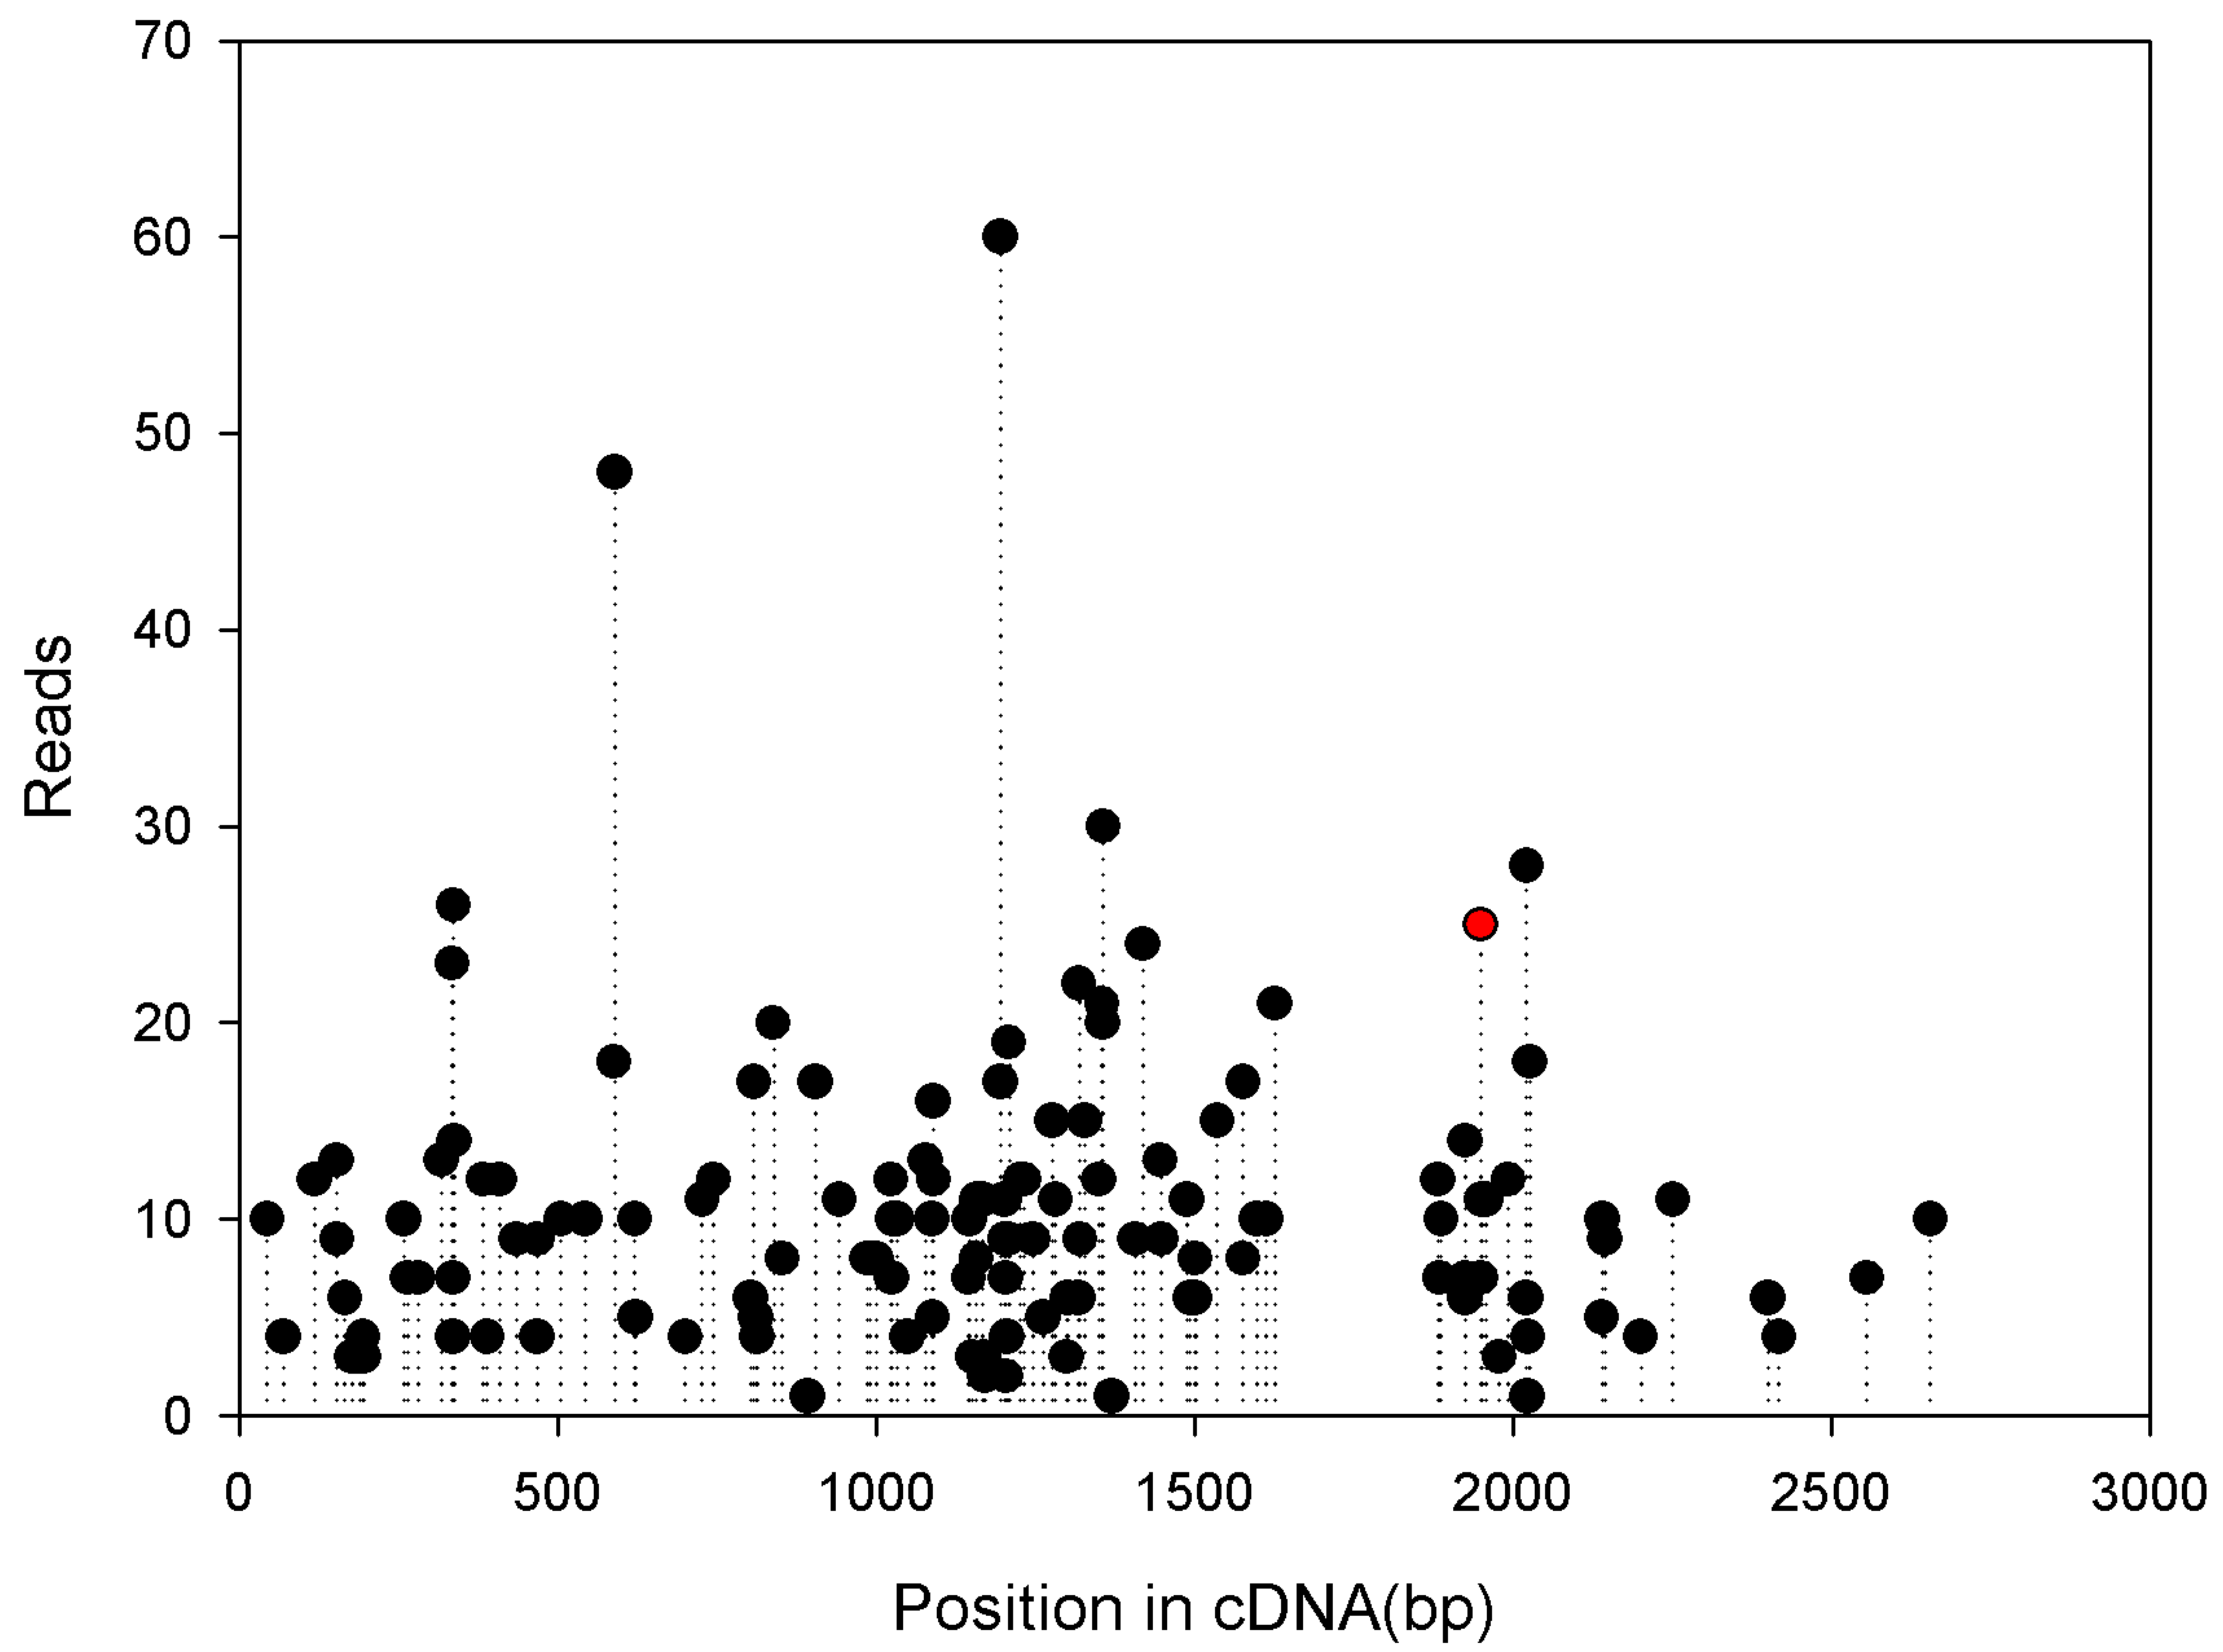

```

5' CAACUACAAUGG-UAUCAUAUUAUGGC 3'
   :::  ::::  ::::::::::  ::
3' ----AUGGUACCUAUAGUAUAAGAC-- 5'
  
```

Cs1g16450.1

Csi-miR482c-Cs9g06846.1-15



Csi-miR482c-Cs9g06846.1-5, target=Cs9g08050.1 gene=Cs9g08050

Category:3

Score:5

Cleavage site:1748

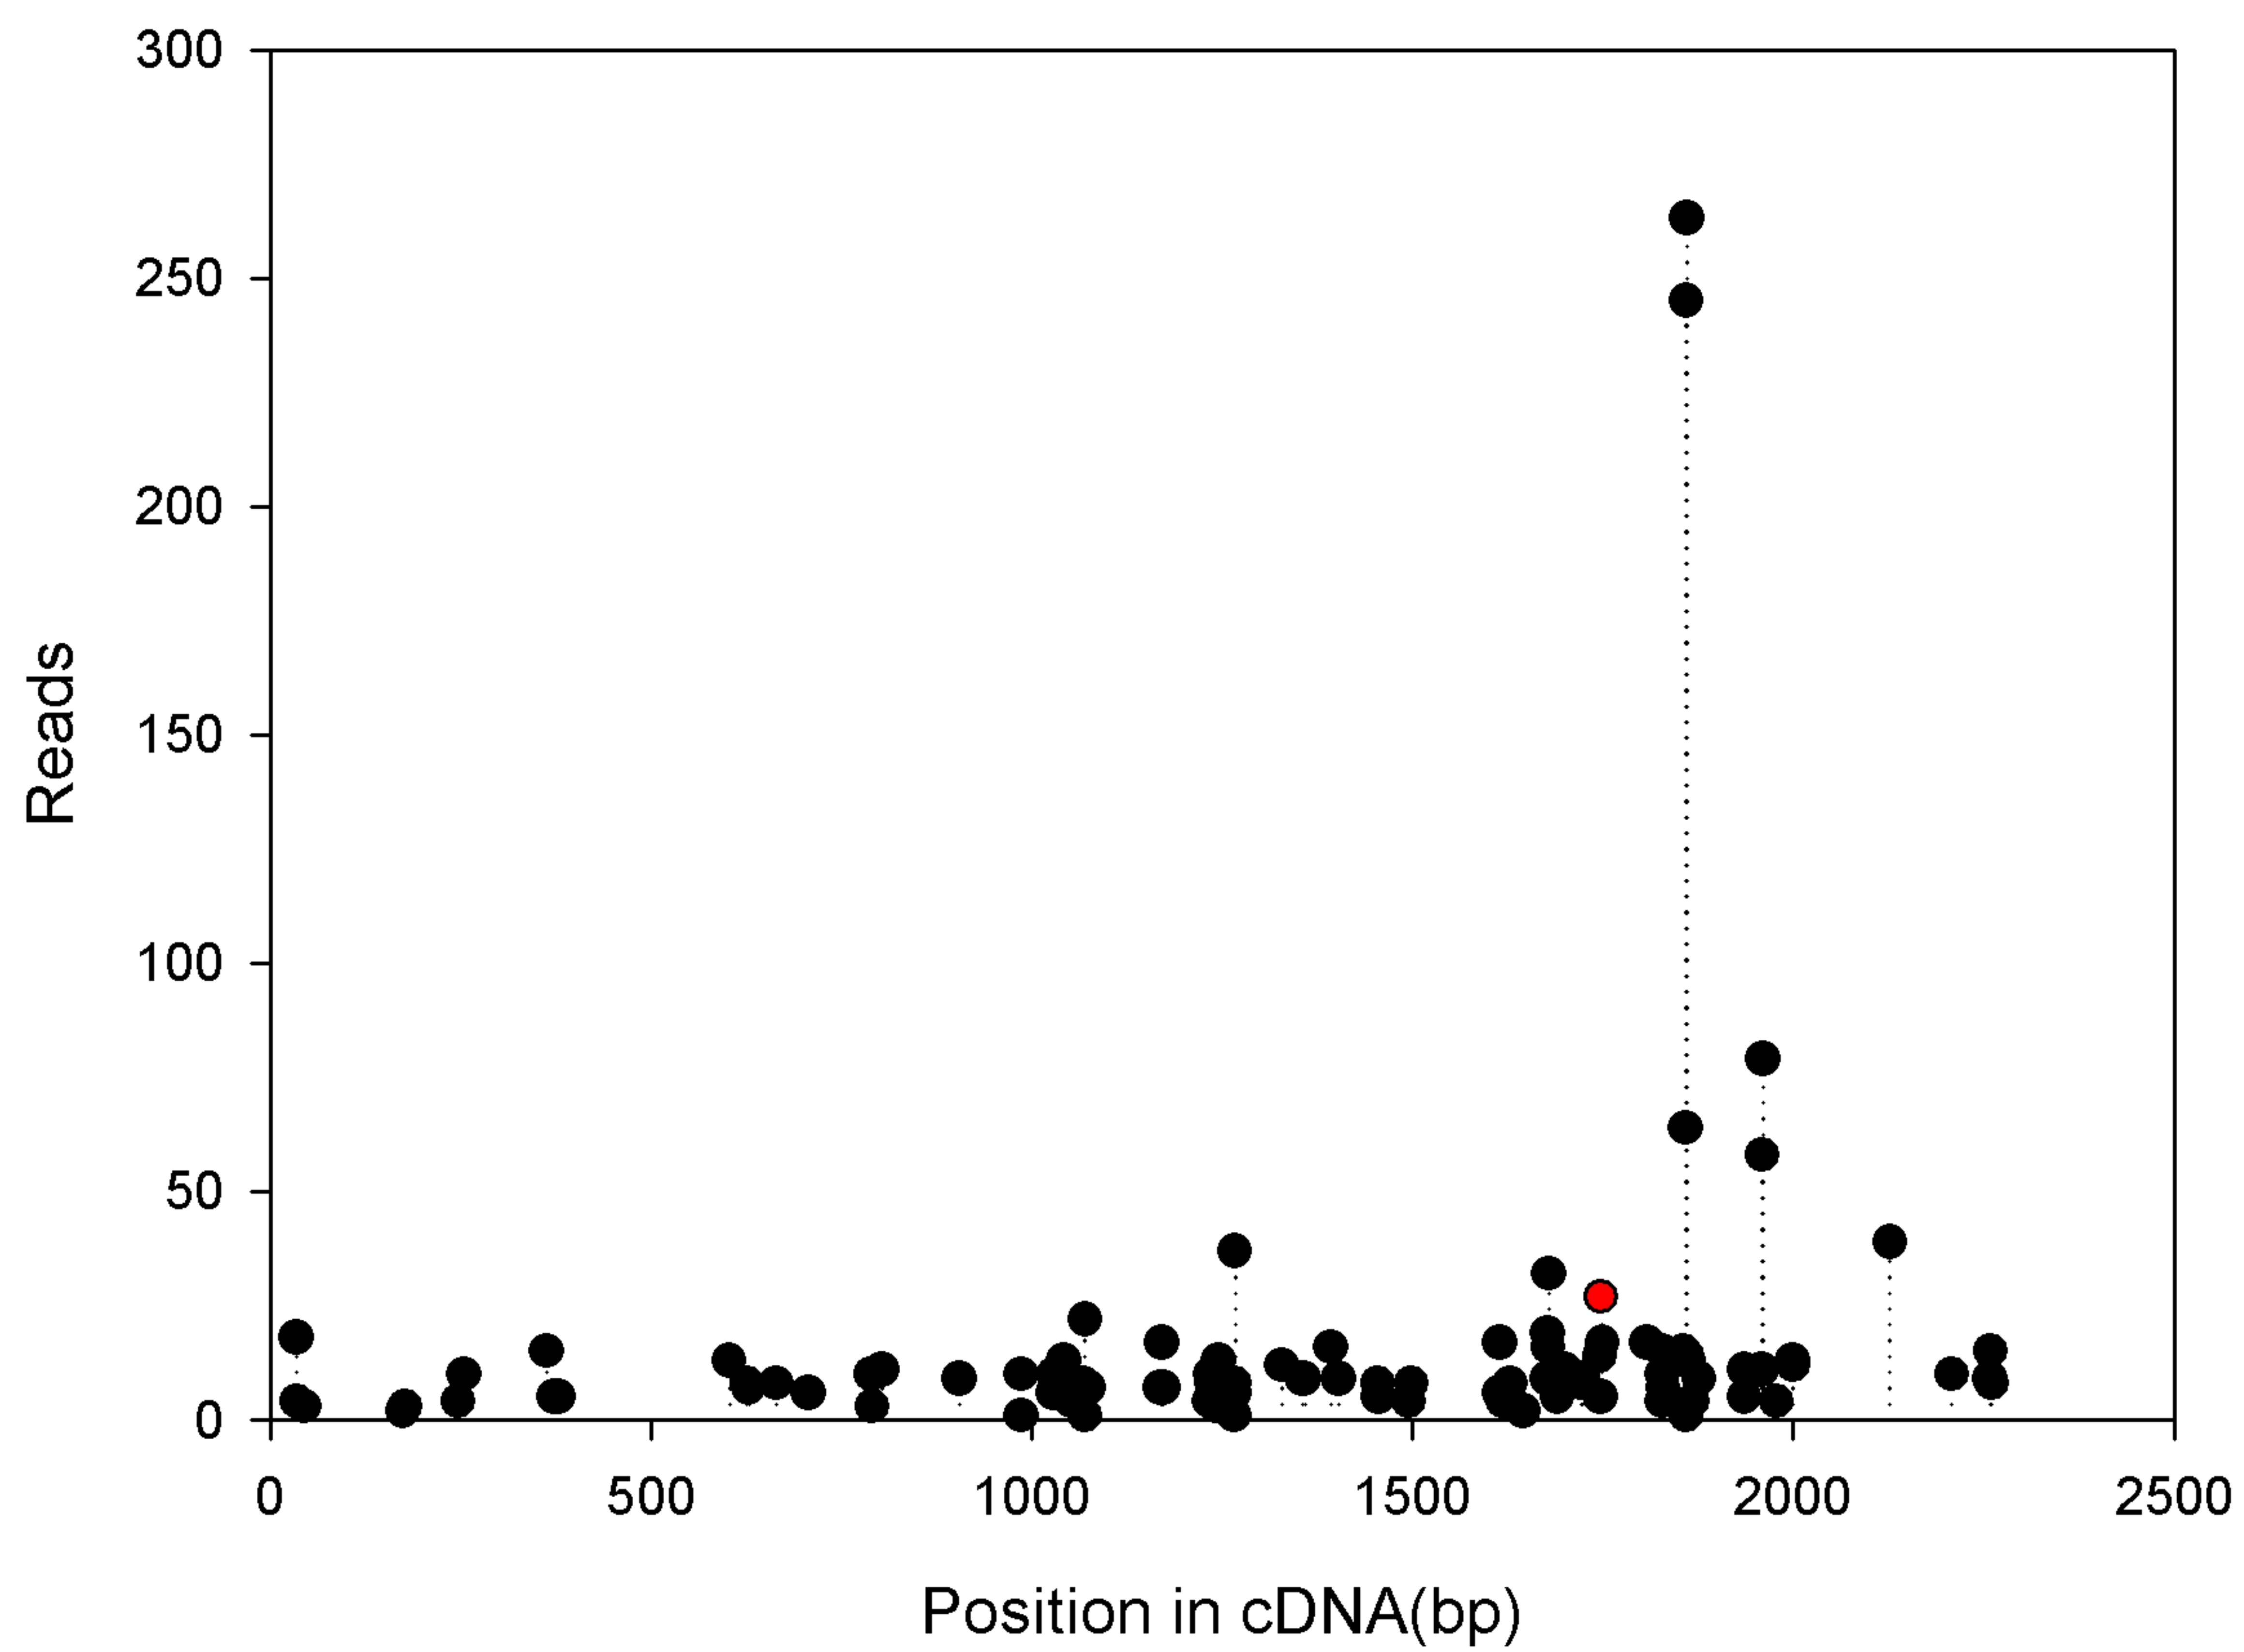

5' GAAGGAAUGGAUGGAUGAGAUUCUUU 3'

Cs9g08050.1

:: : :::::::::::::::

3' -UUACACACCUACUUAUUCUAA---- 5'

Csi-miR482c-Cs9g06846.1-5

Csi-miR482c-Cs9g06846.1-6, target=Cs7g31270.1 gene=Cs7g31270

Category:3

Score:5

Cleavage site:897

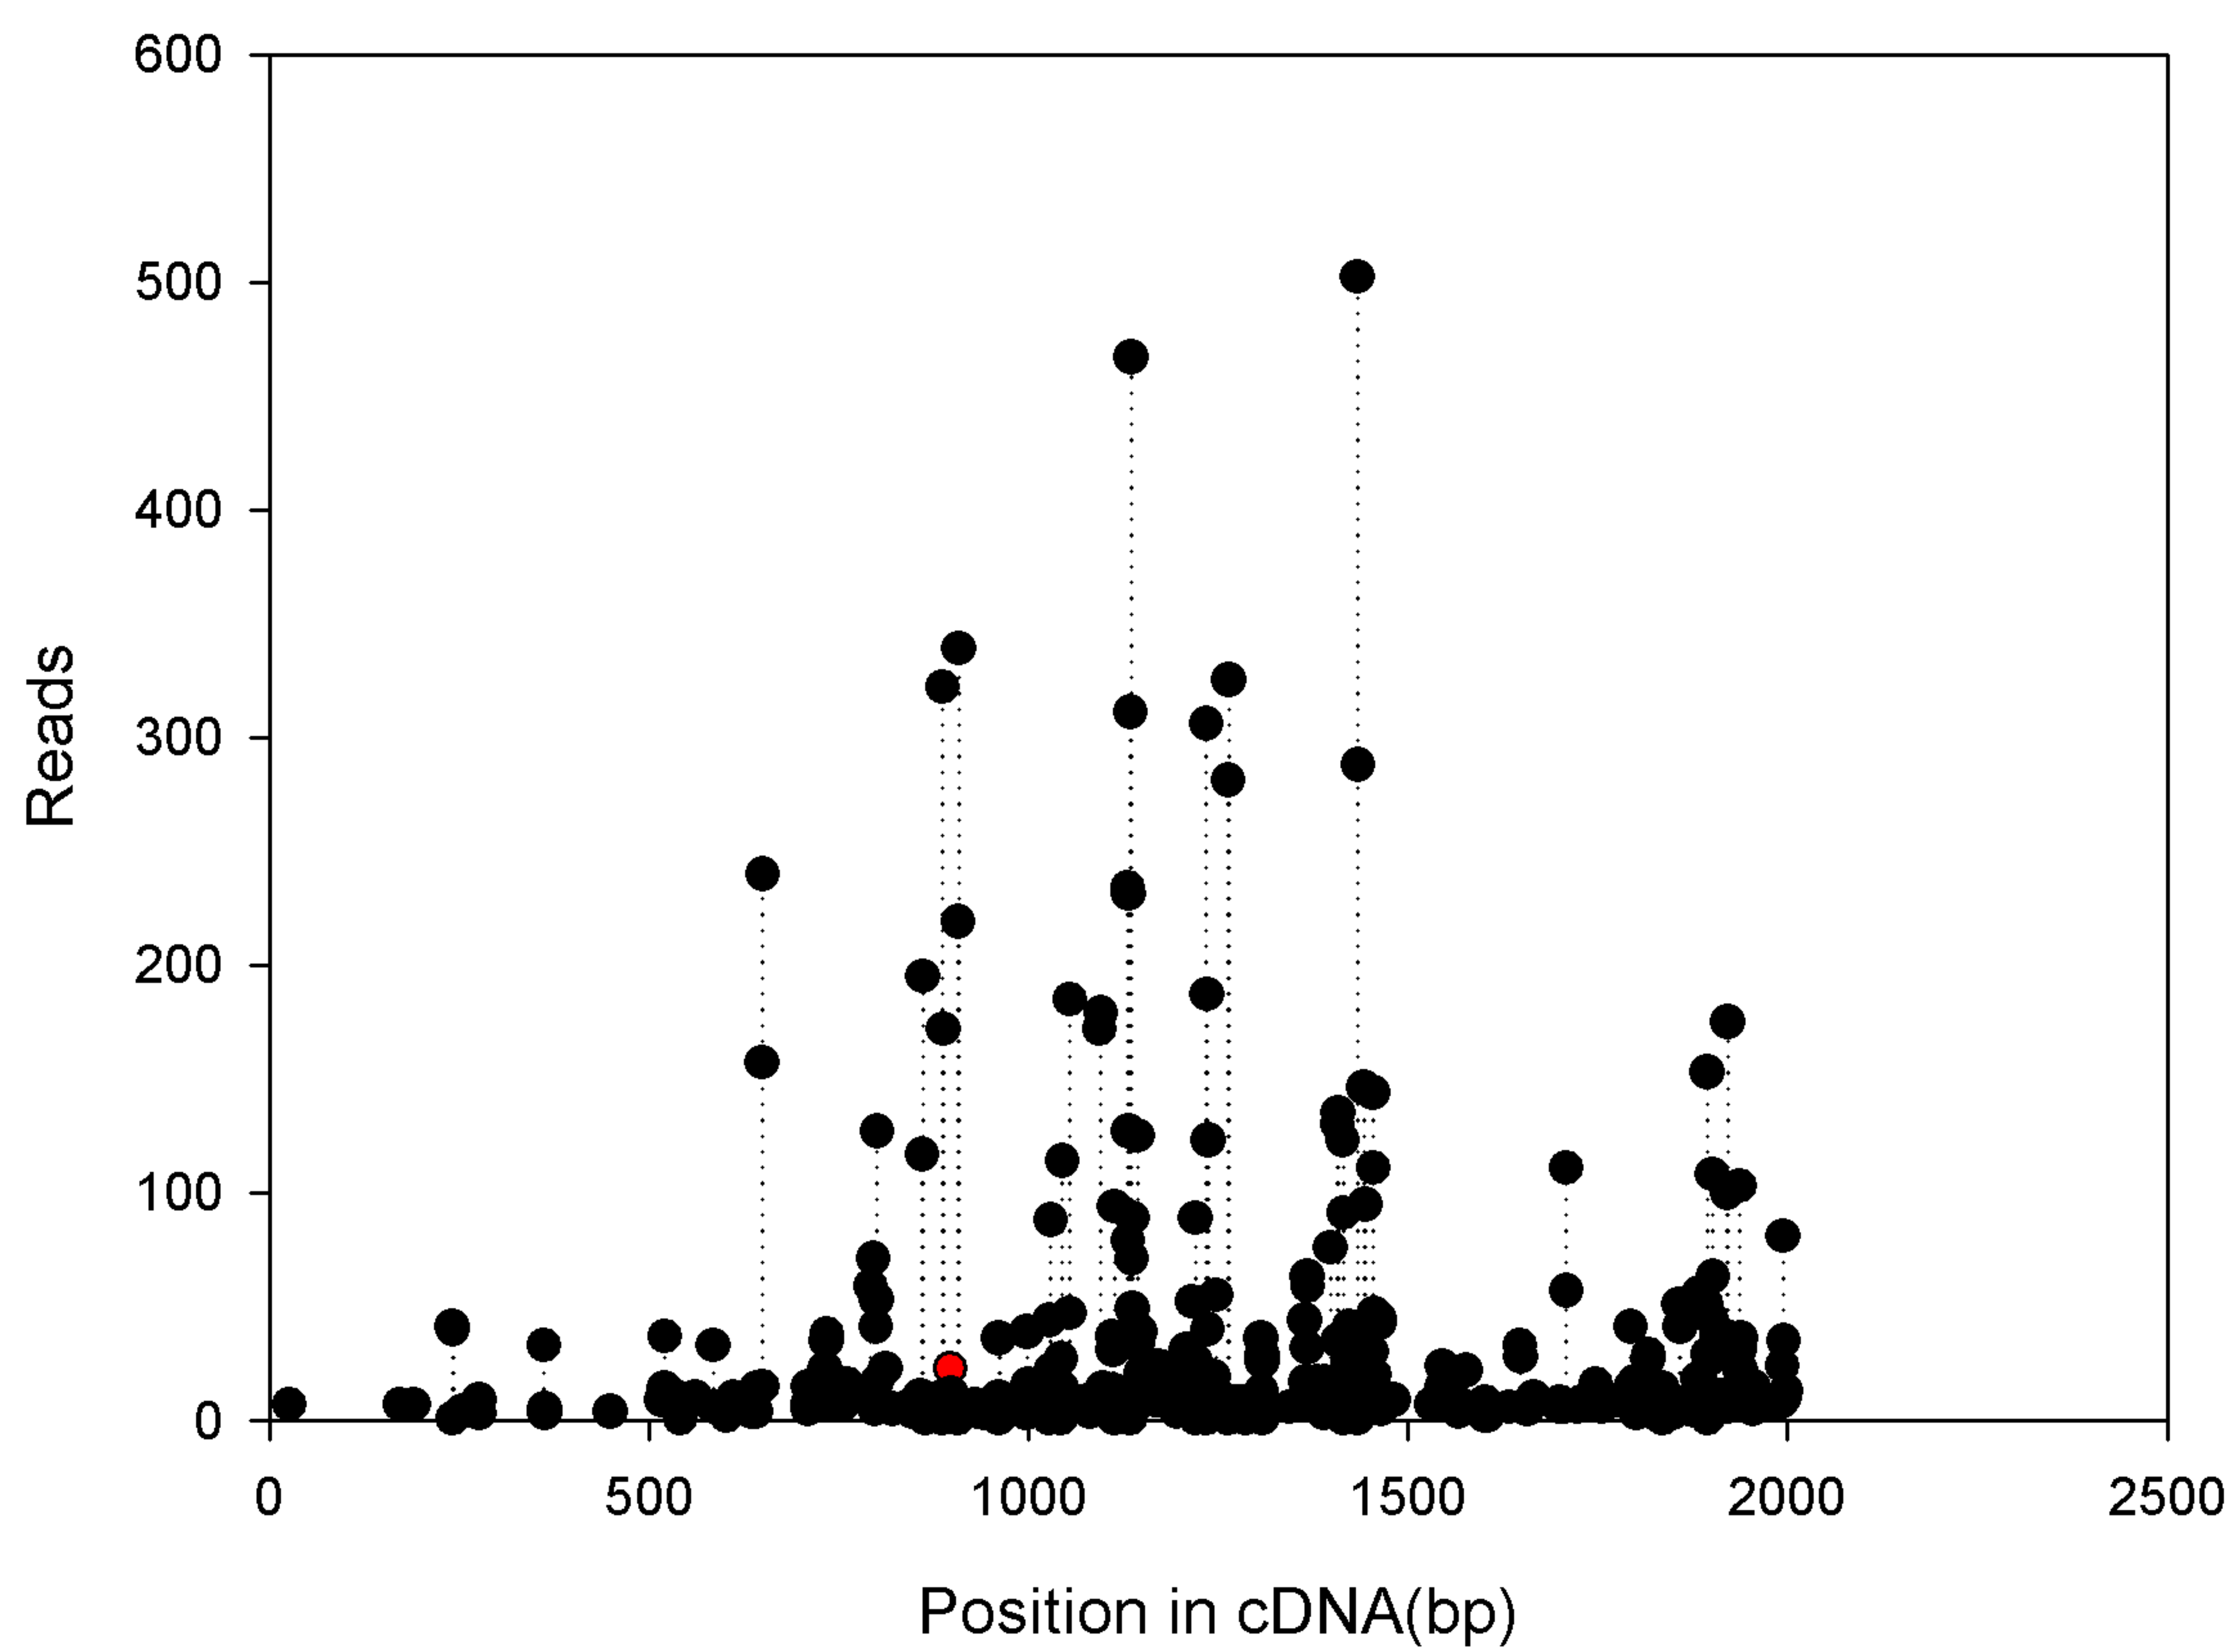

5' CAUAUGCUGAGGGAUU-GGAACACUUG 3'

Cs7g31270.1

::::: : : : :

3' --AUACGACGCCCUAAGCAUUGU---- 5'

Csi-miR482c-Cs9g06846.1-6

Csi-miRN20-Cs3g05320.1-14, target=Cs8g19960.1 gene=Cs8g19960  
 Category:2  
 Score:4.5  
 Cleavage site:544

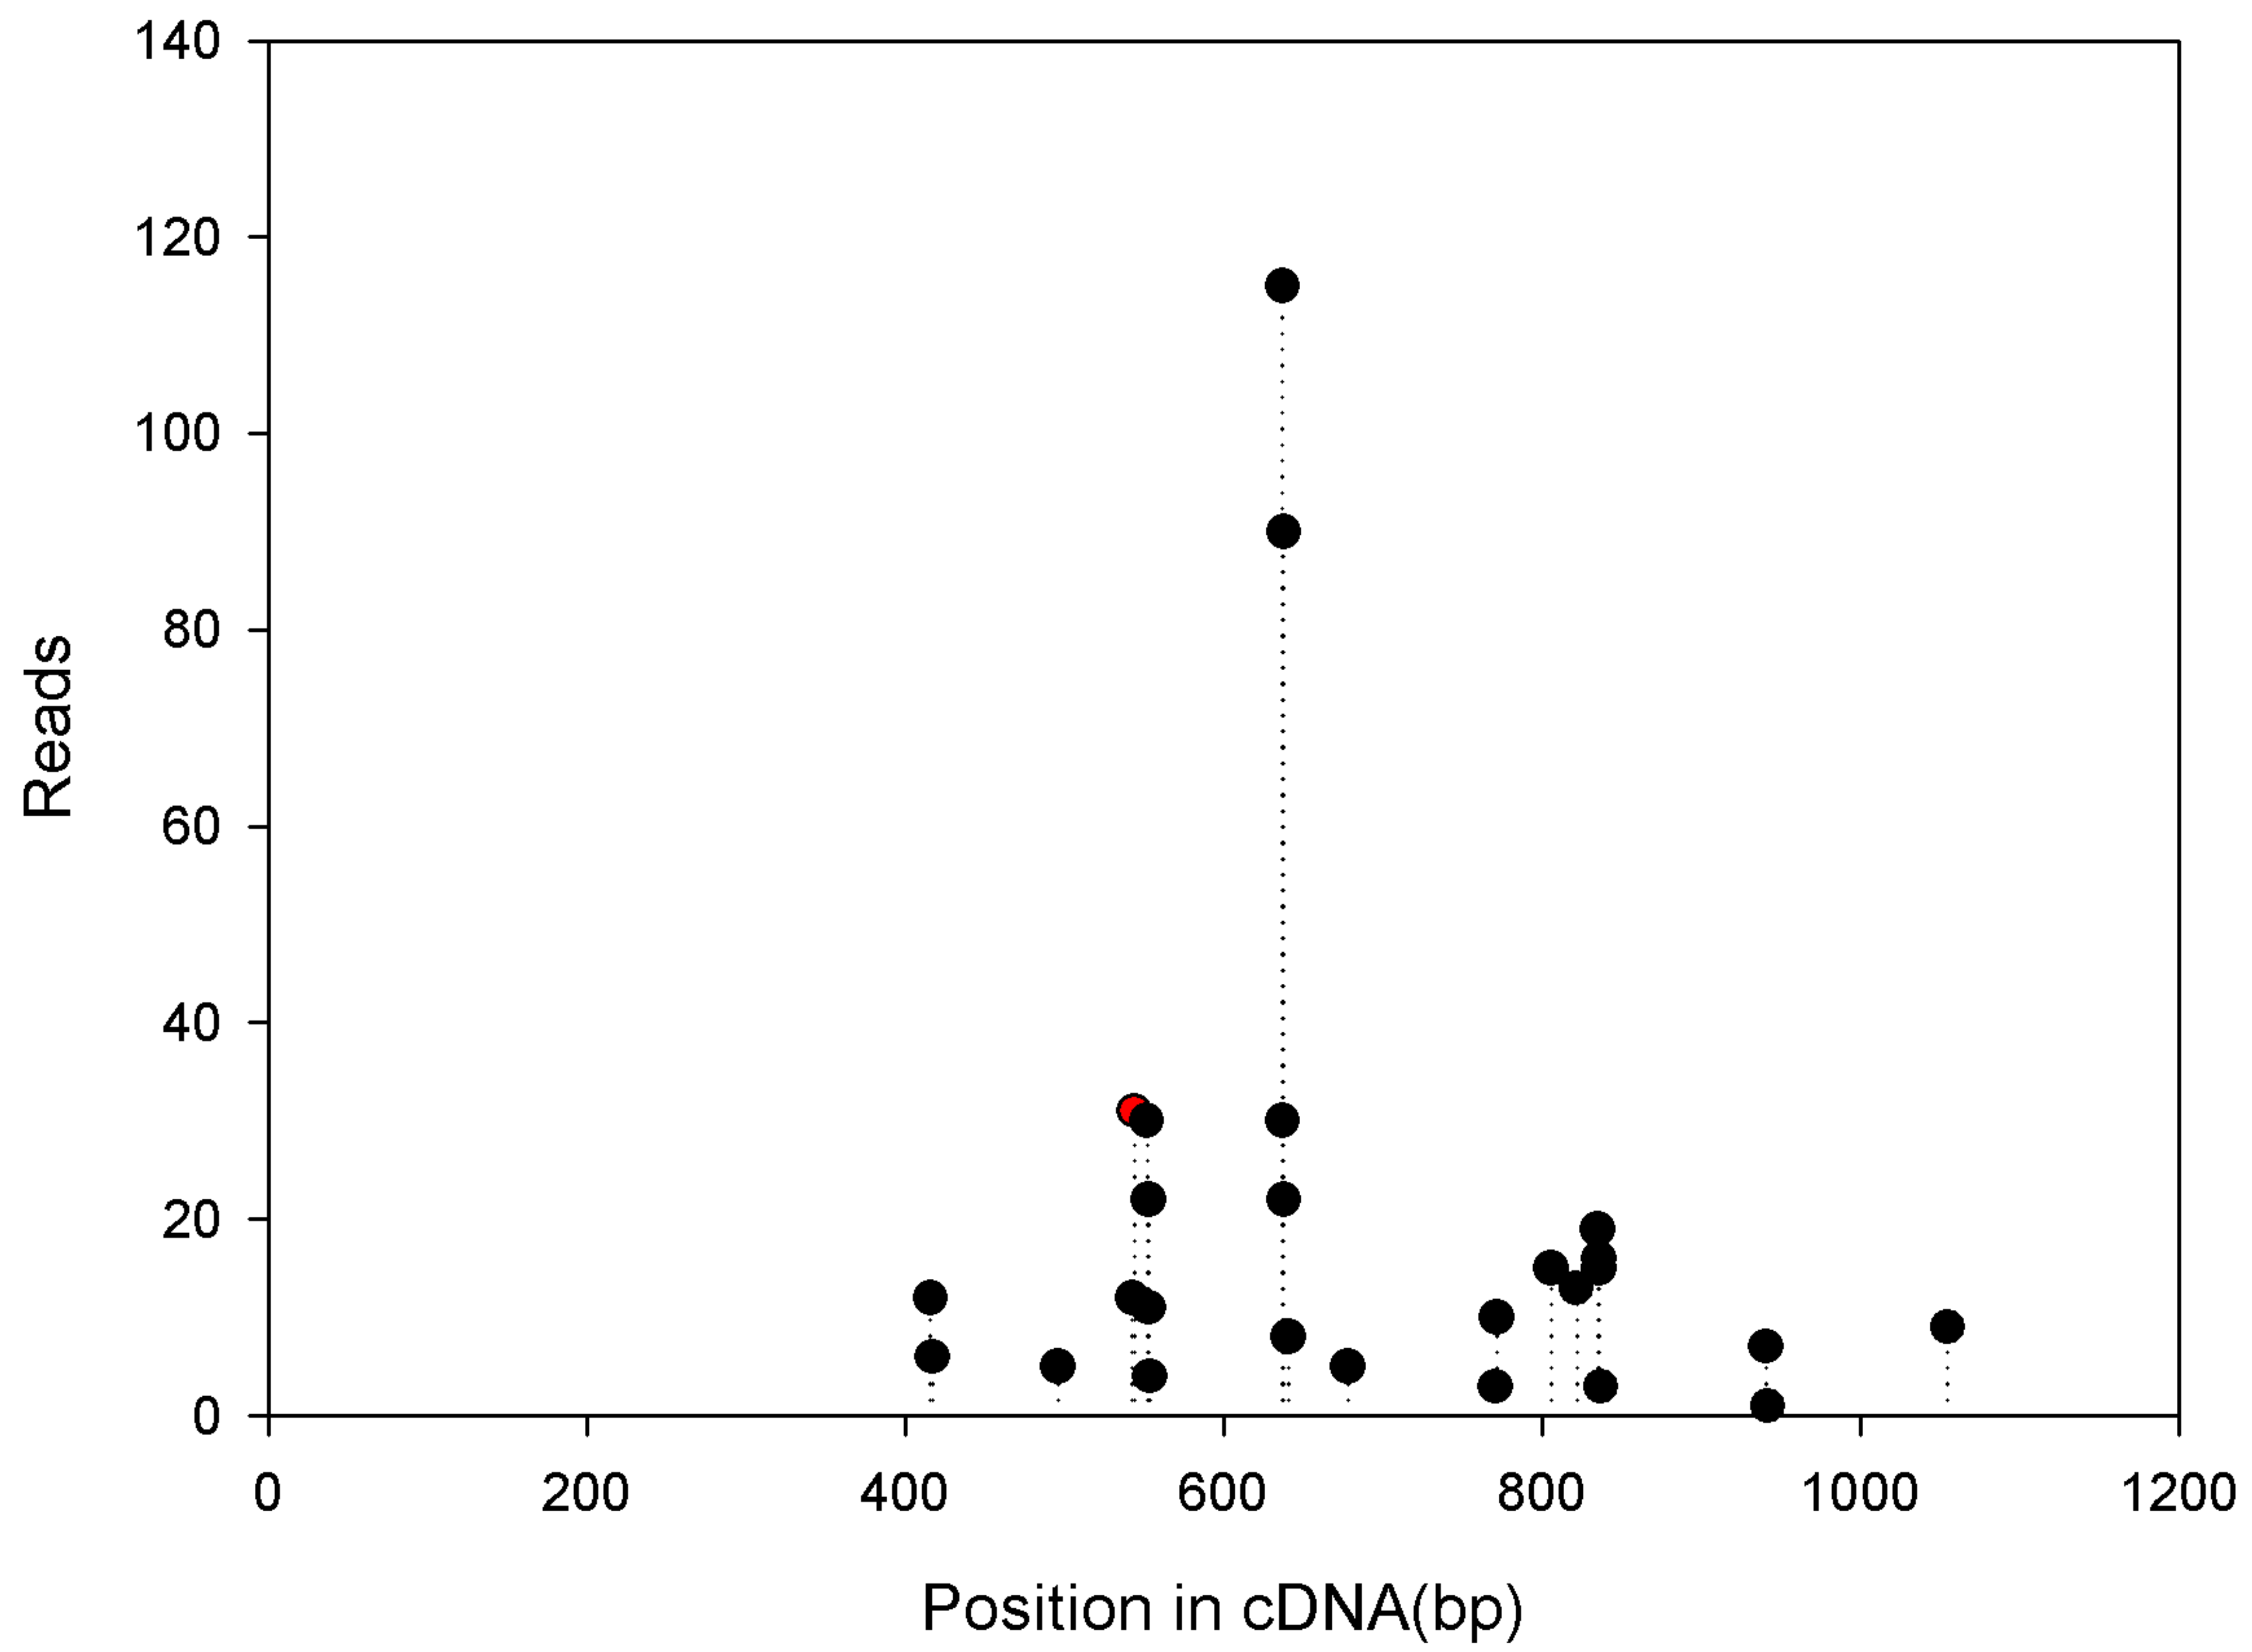

```

5' GAAACAAGAUCAGUUUUUAU-GAAACUG 3'
   ::::: ::::: :::::
3' ----GUUUUUGUCAGAAUAGCUUUG-- 5'

```

Cs8g19960.1

Csi-miRN20-Cs3g05320.1-14

Csi-miRN20-Cs3g05320.1-16, target=Cs9g03400.1 gene=Cs9g03400  
 Category:3  
 Score:5  
 Cleavage site:871

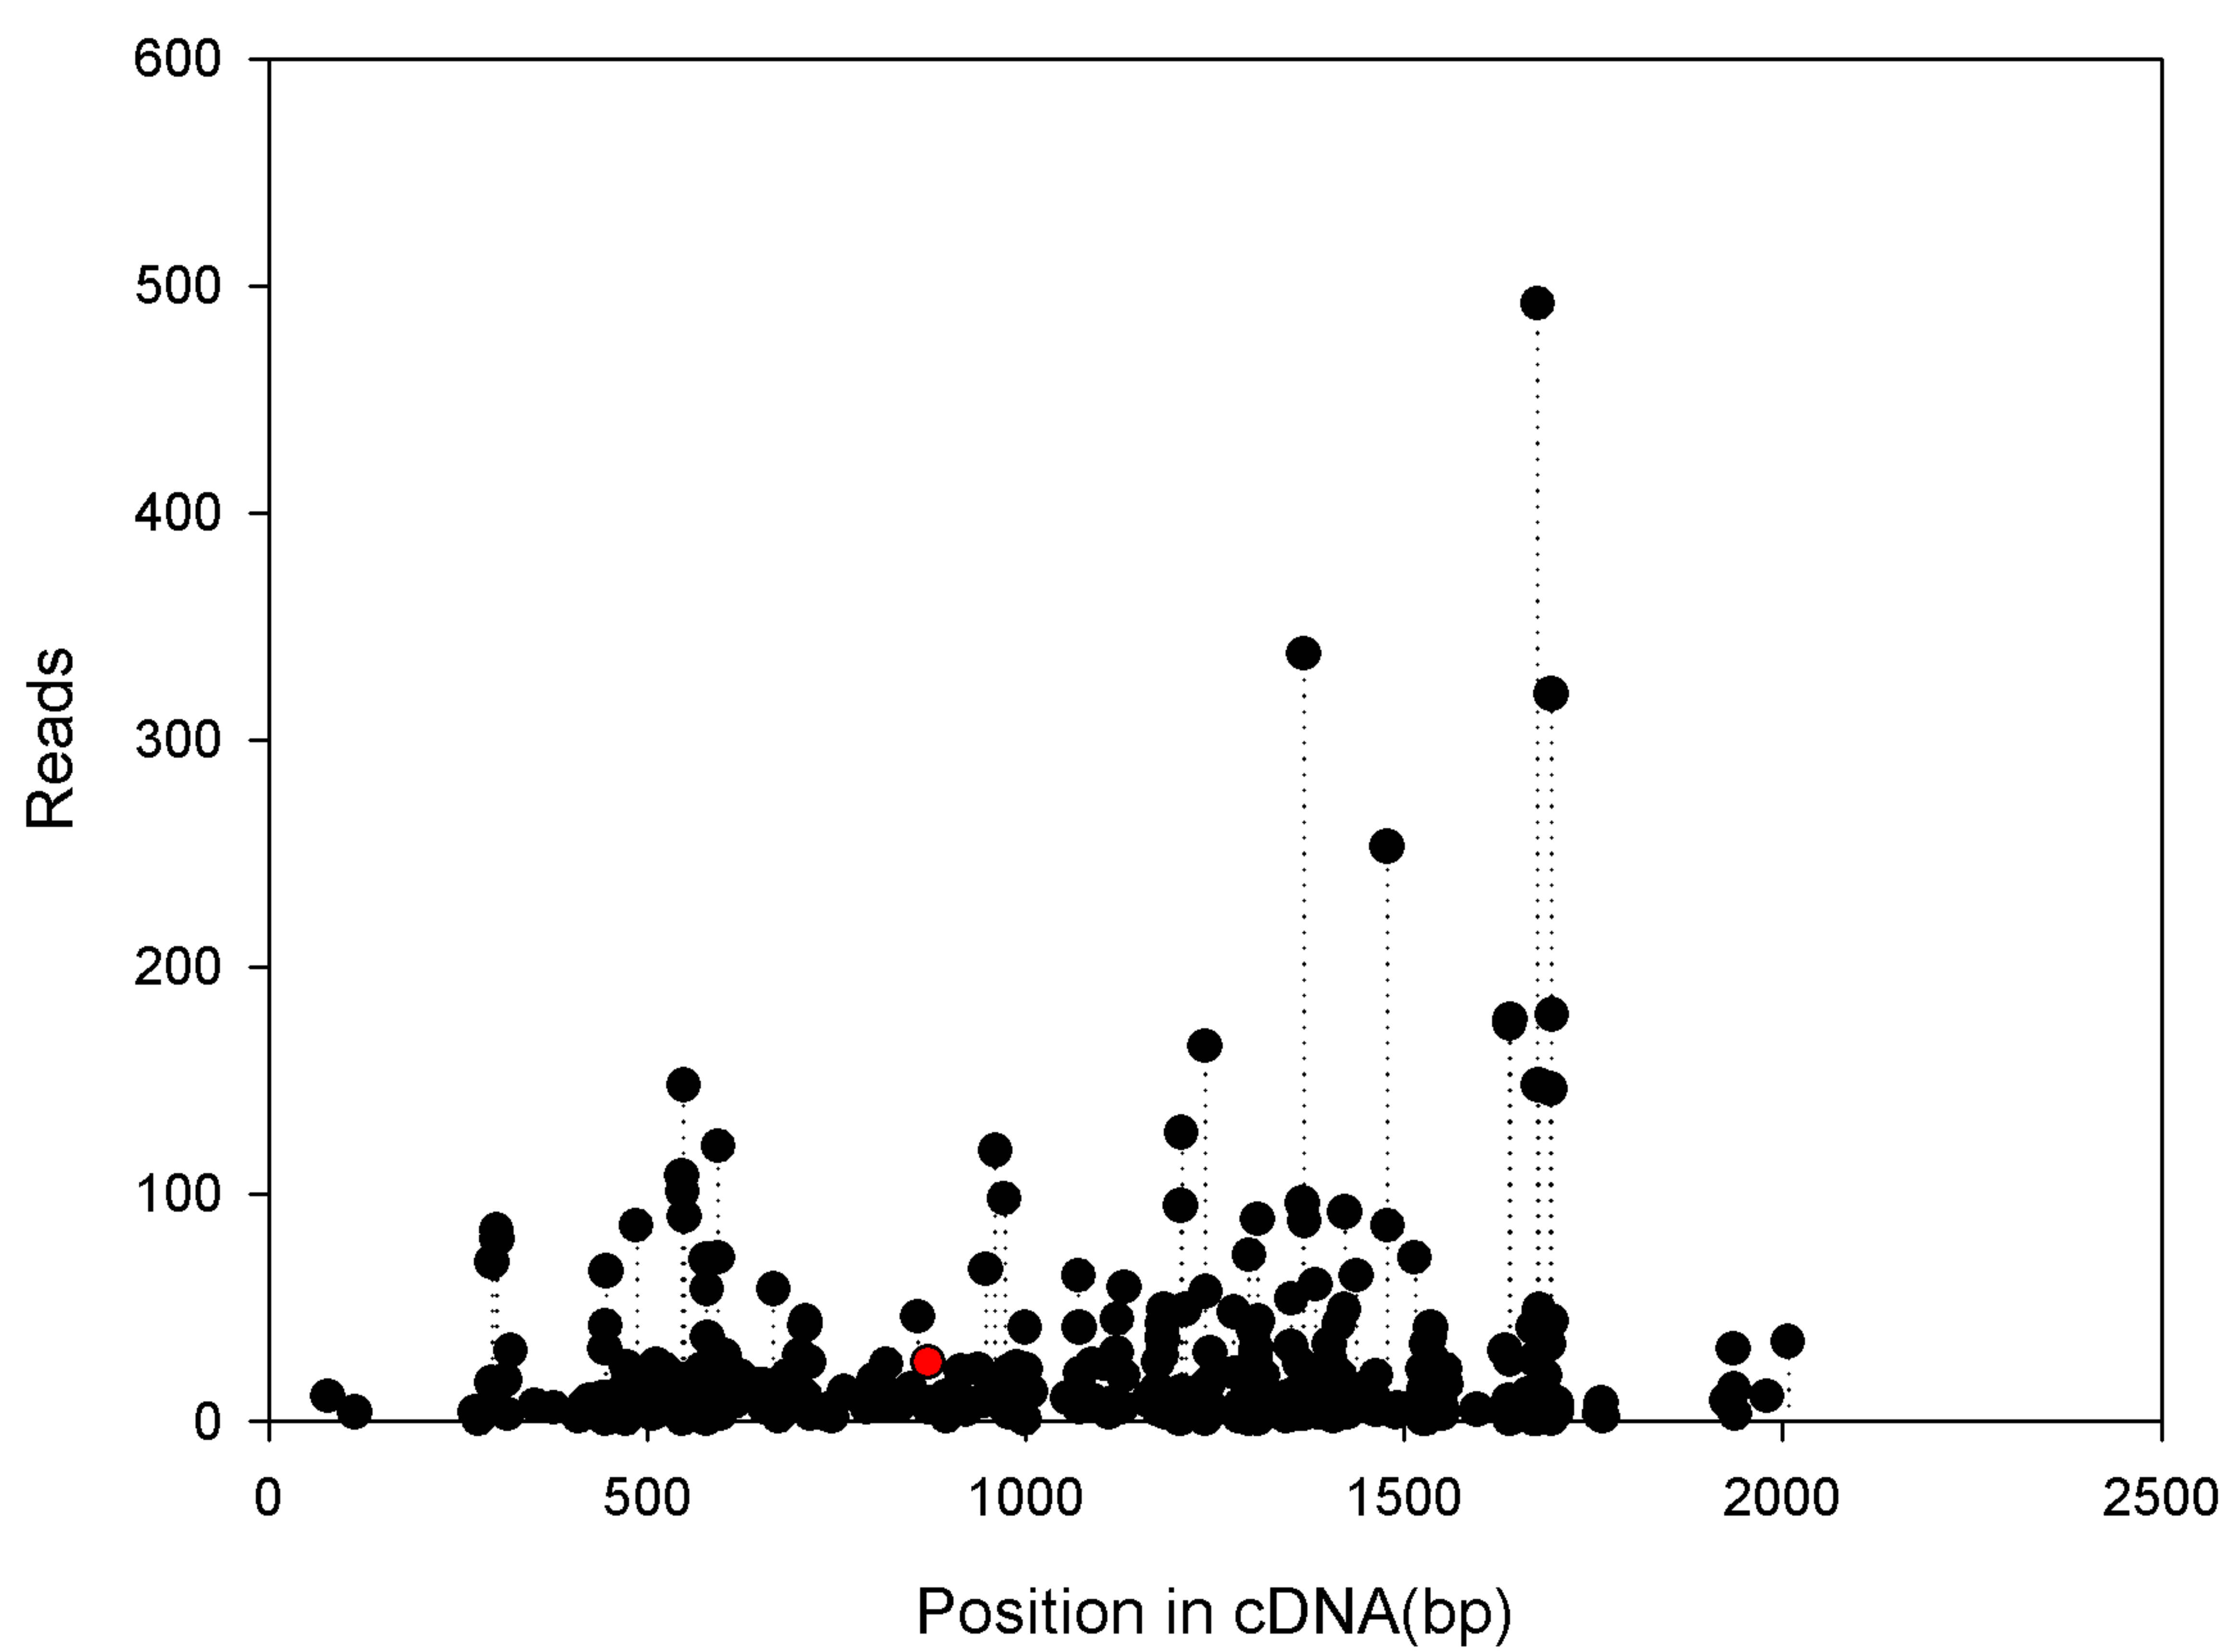

|                                         |                           |
|-----------------------------------------|---------------------------|
| 5' AAUCCCAAUCAAA-UUGACAUGAUUG 3'        | Cs9g03400.1               |
| : : : : : : : : : : : : : : : : : : : : |                           |
| 3' ----GUUUUAUUUUGAACUGUACUA-- 5'       | Csi-miRN20-Cs3g05320.1-16 |

Csi-miRN20-Cs3g05320.1-19, target=Cs7g05730.1 gene=Cs7g05730

Category:1

Score:5

Cleavage site:2376

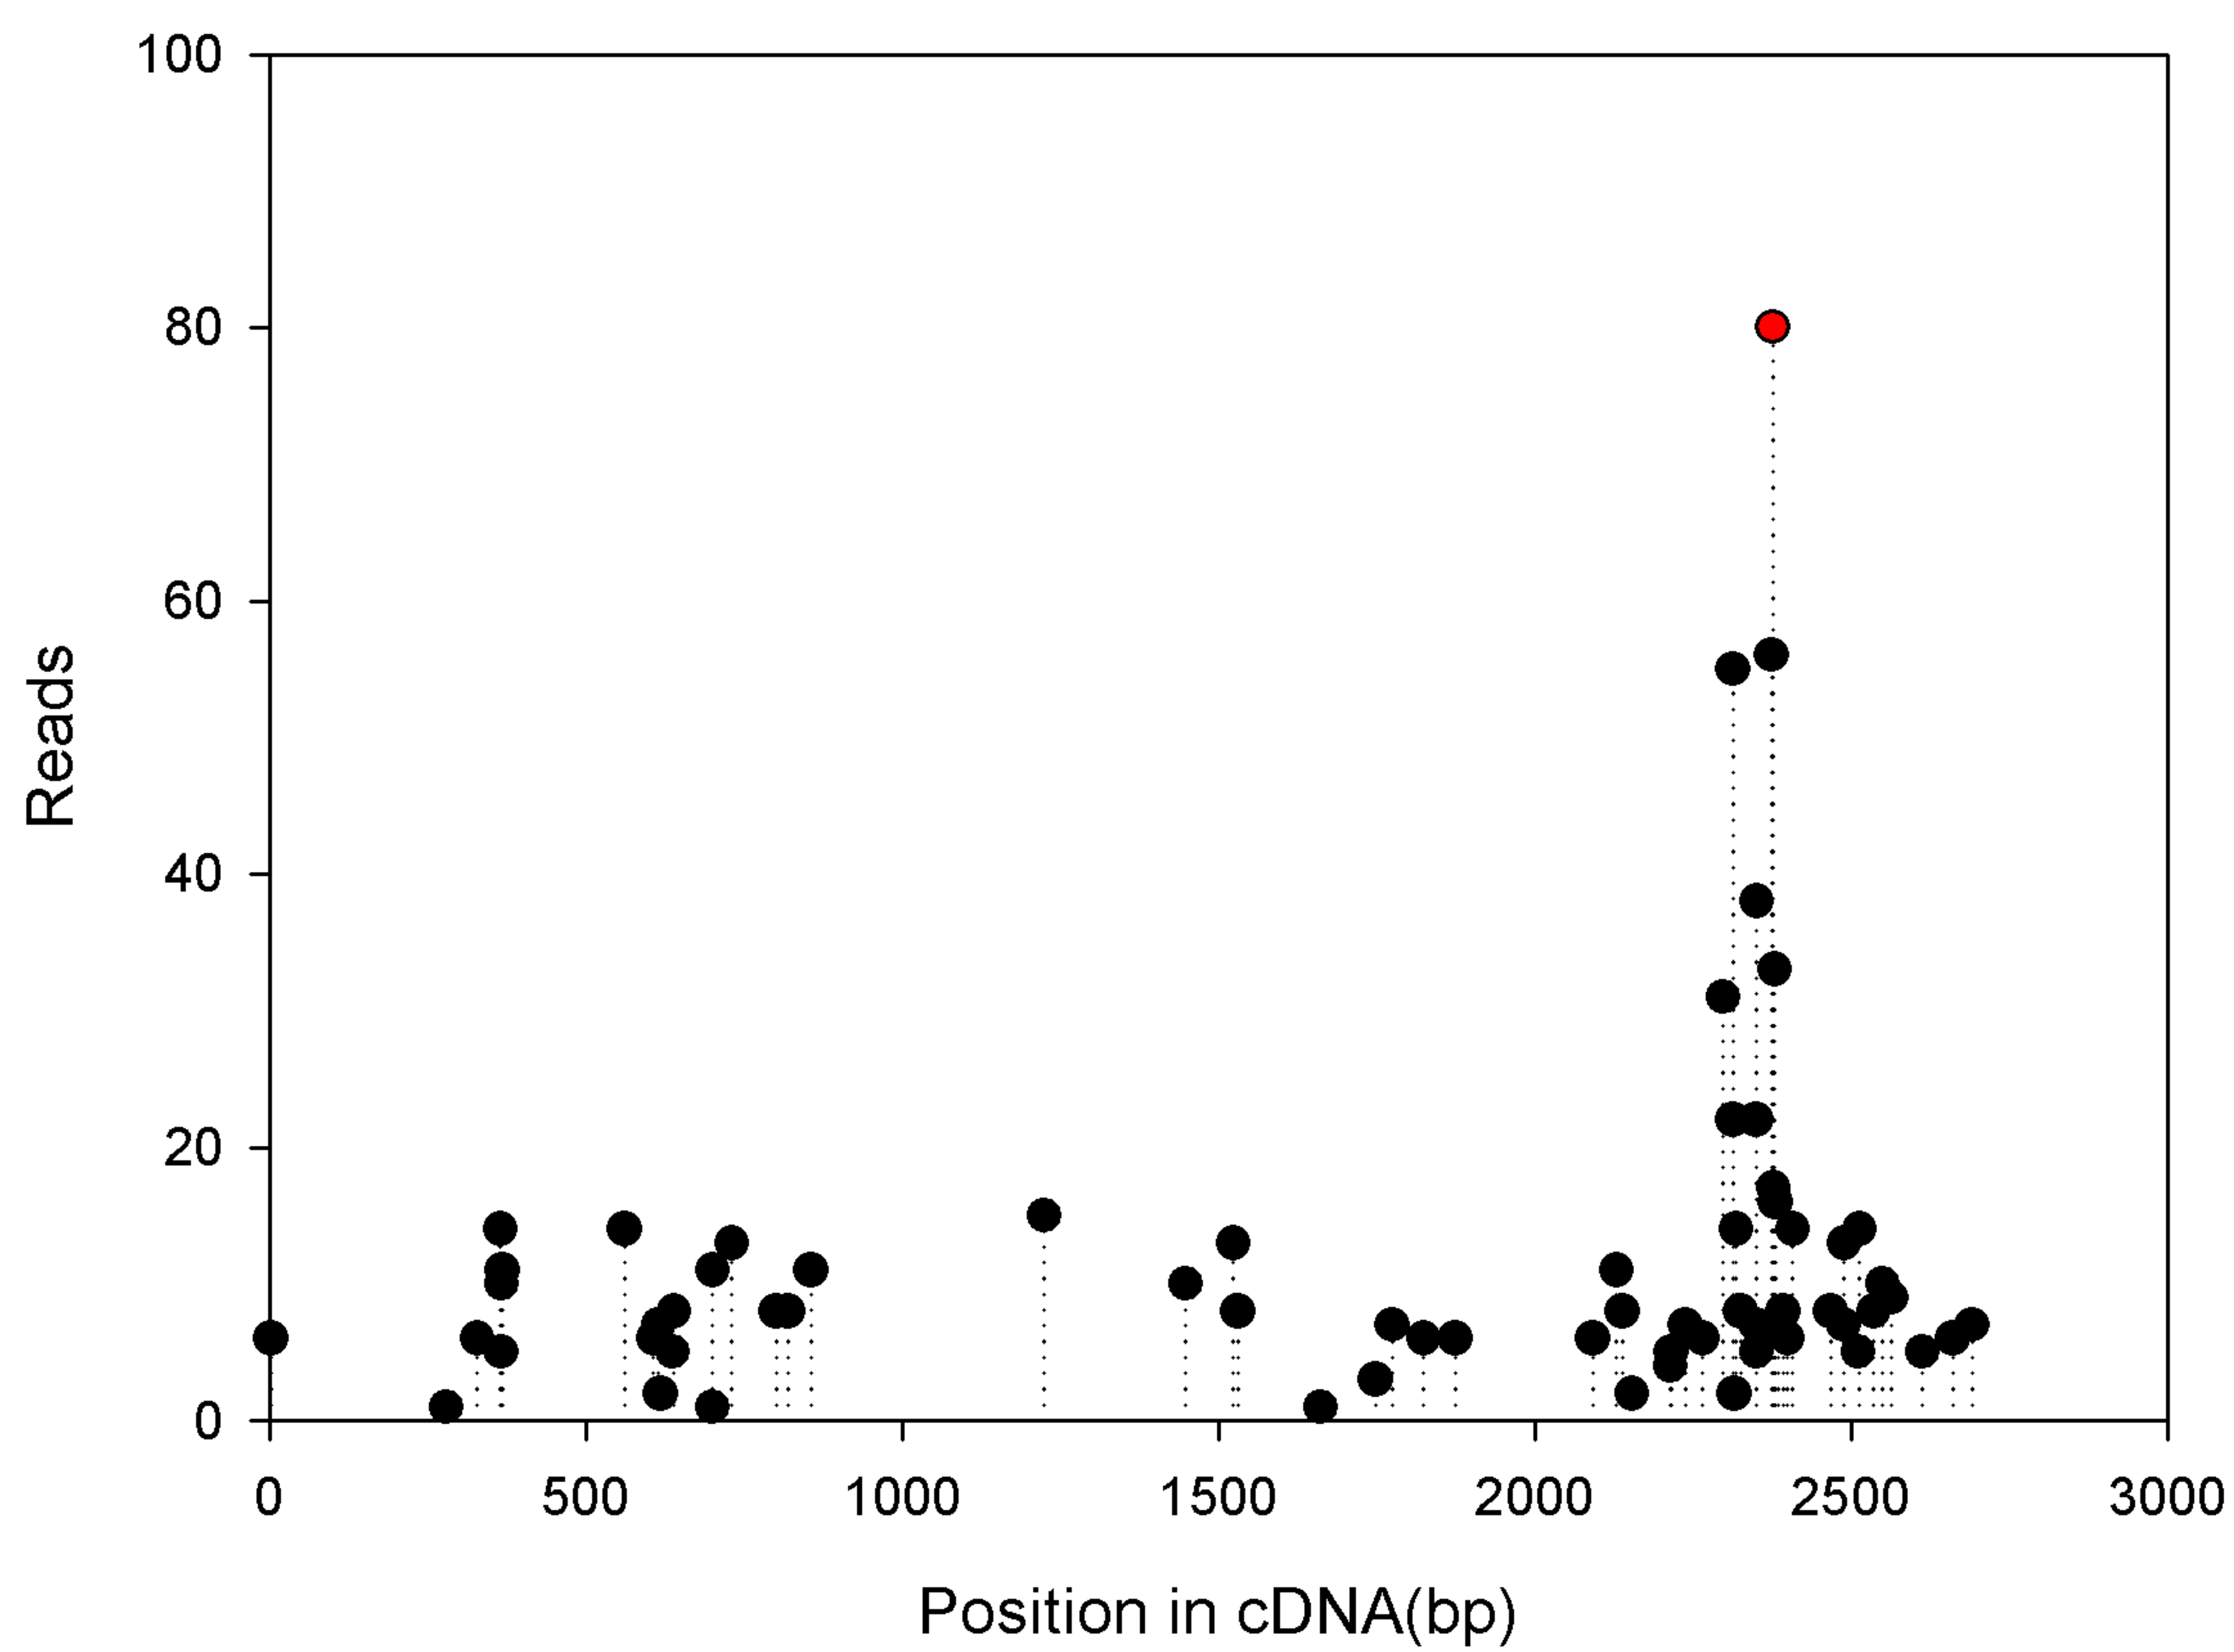

5' UGUACAAGAUGAUUUAAUAUCUUGCU 3'

Cs7g05730.1

:: ::::::::::::::::::::

3' ----GUAUACUAGGUUAUAGAACA- 5'

Csi-miRN20-Cs3g05320.1-19

Csi-miRN20-Cs3g05320.1-24, target=Cs1g12760.1 gene=Cs1g12760  
 Category:2  
 Score:4.5  
 Cleavage site:652

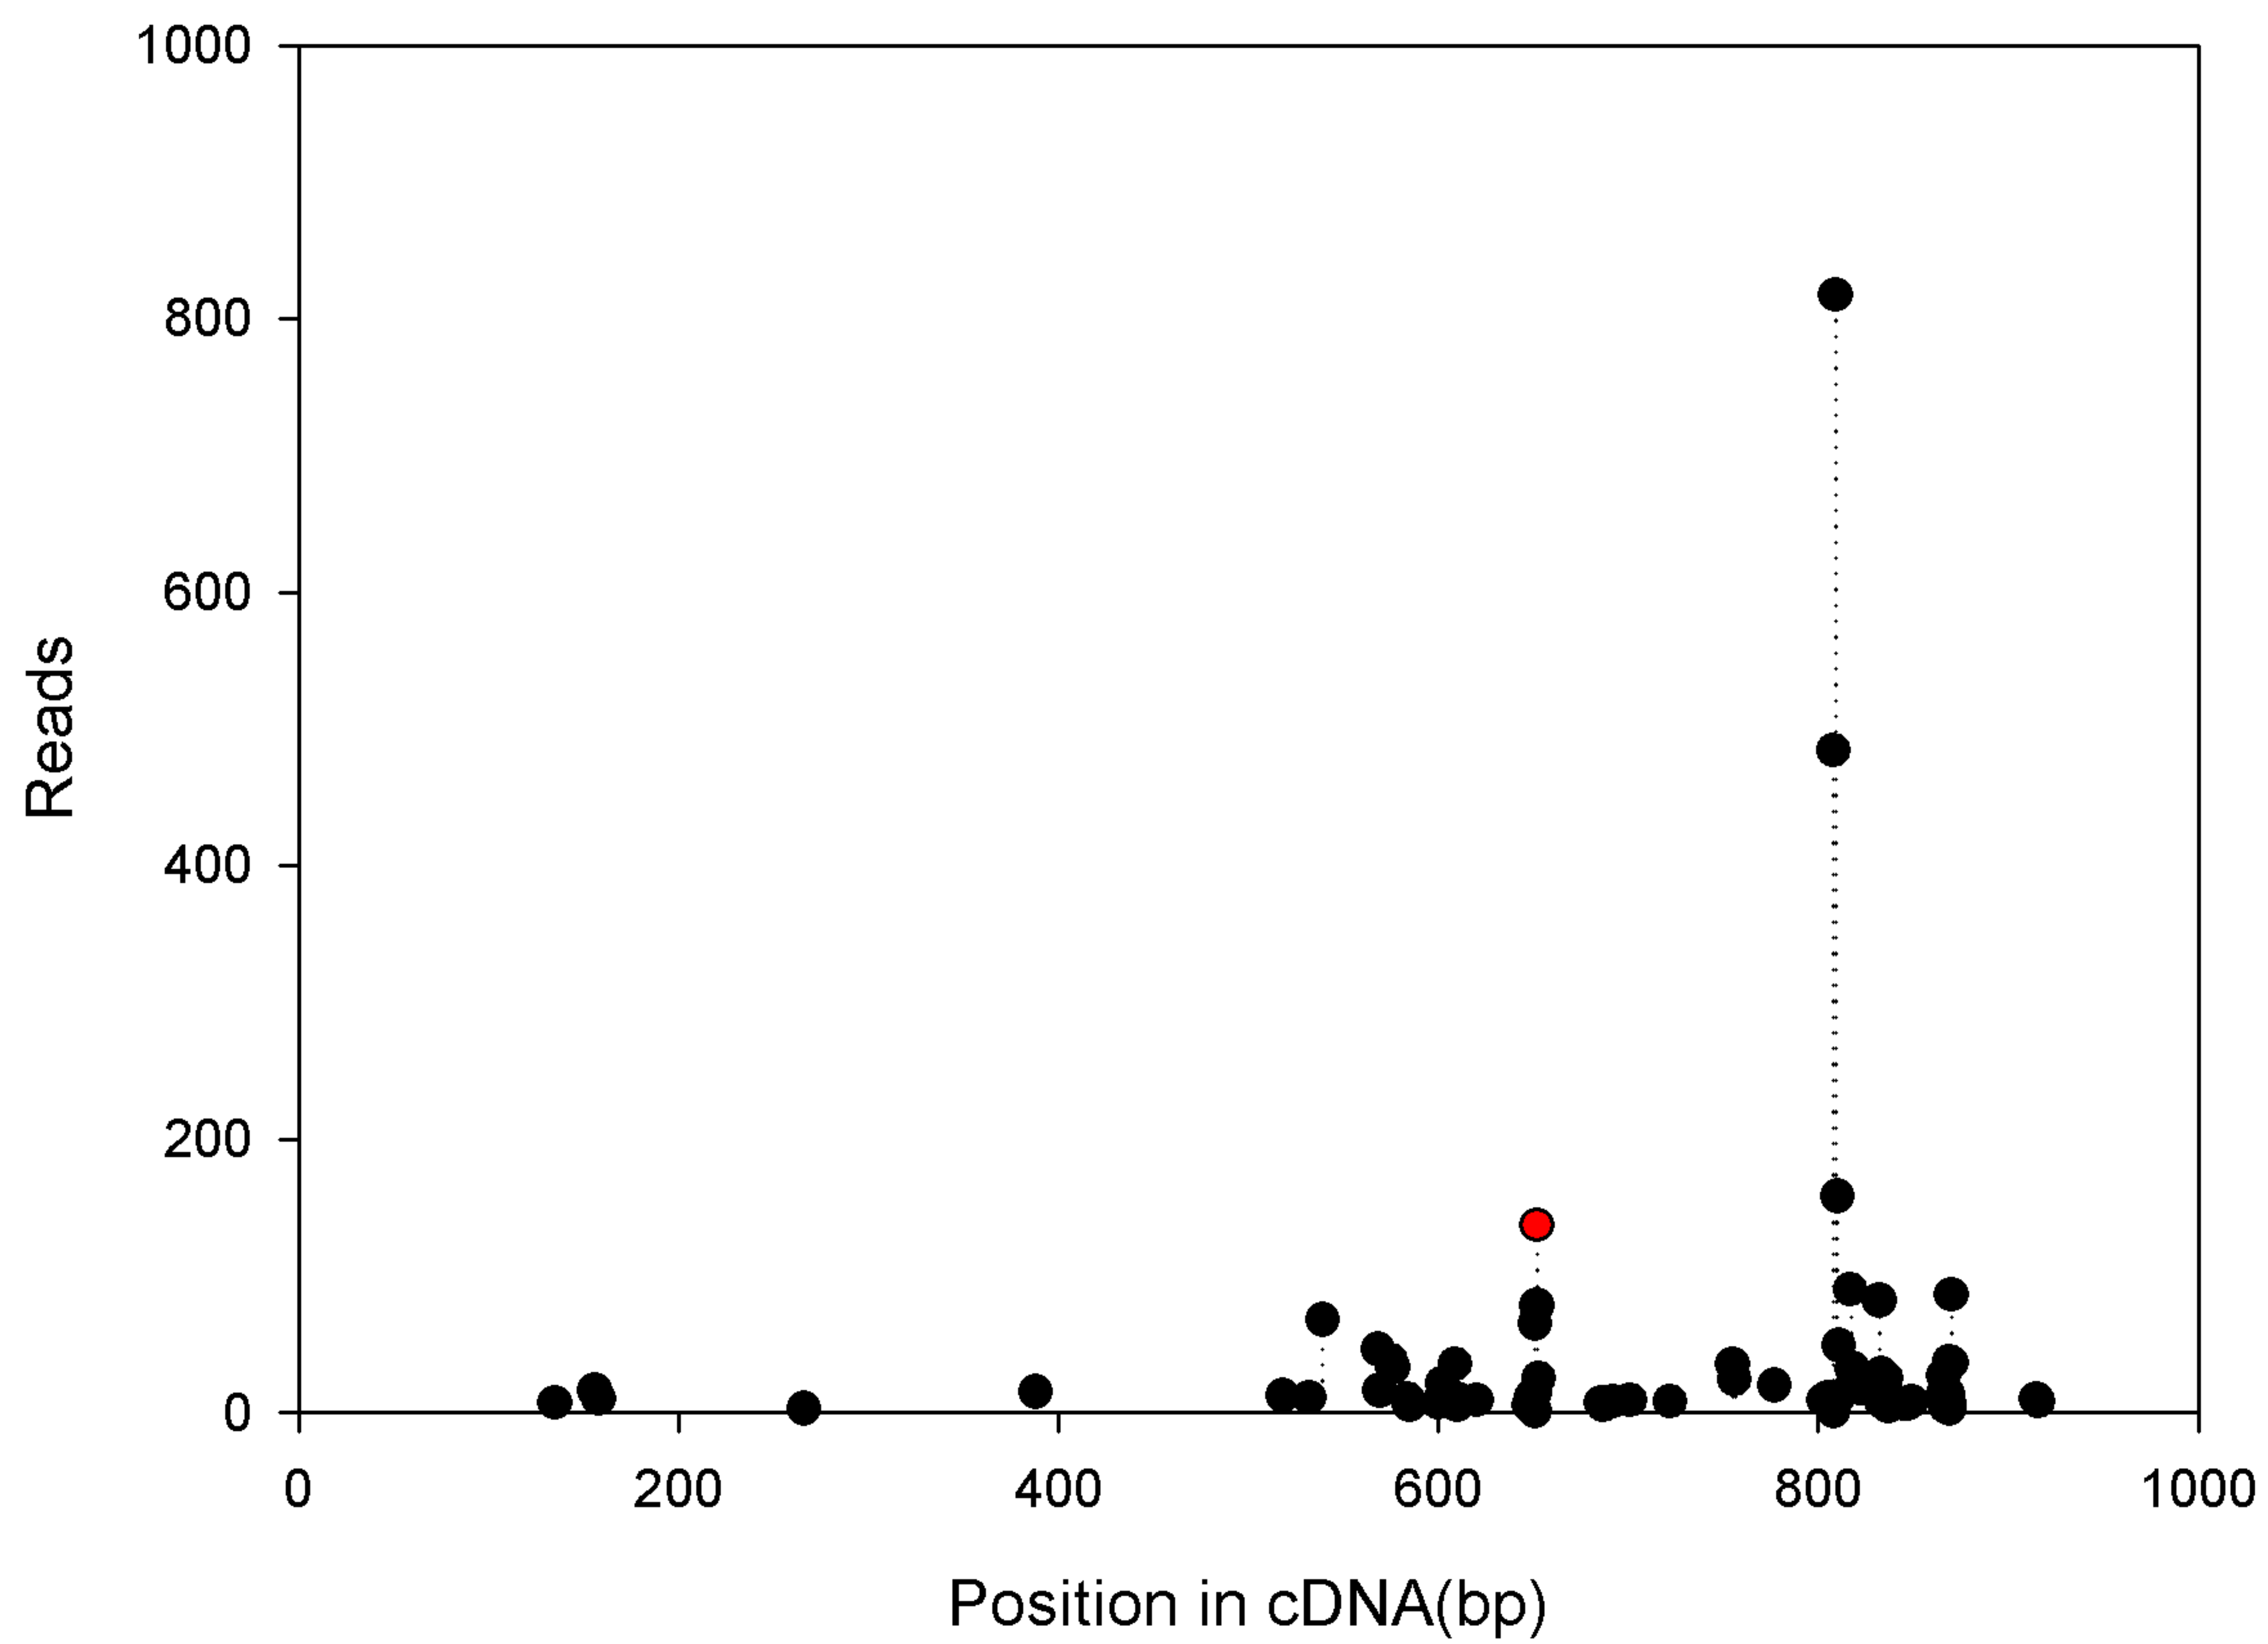

5' UAUGUCGGC-UGGGUGACUAUUAUCAU 3'  
 :.:. : .:.:.:.:.:.:.:.:.  
 3' -----GUUGUAGUCAUUGAUAAUAGU- 5'

Cs1g12760.1

Csi-miRN20-Cs3g05320.1-24

Csi-miRN20-Cs3g05320.1-24, target=Orange1.1t00622.1 gene=Orange1.1t00622  
Category:2  
Score:5  
Cleavage site:1354

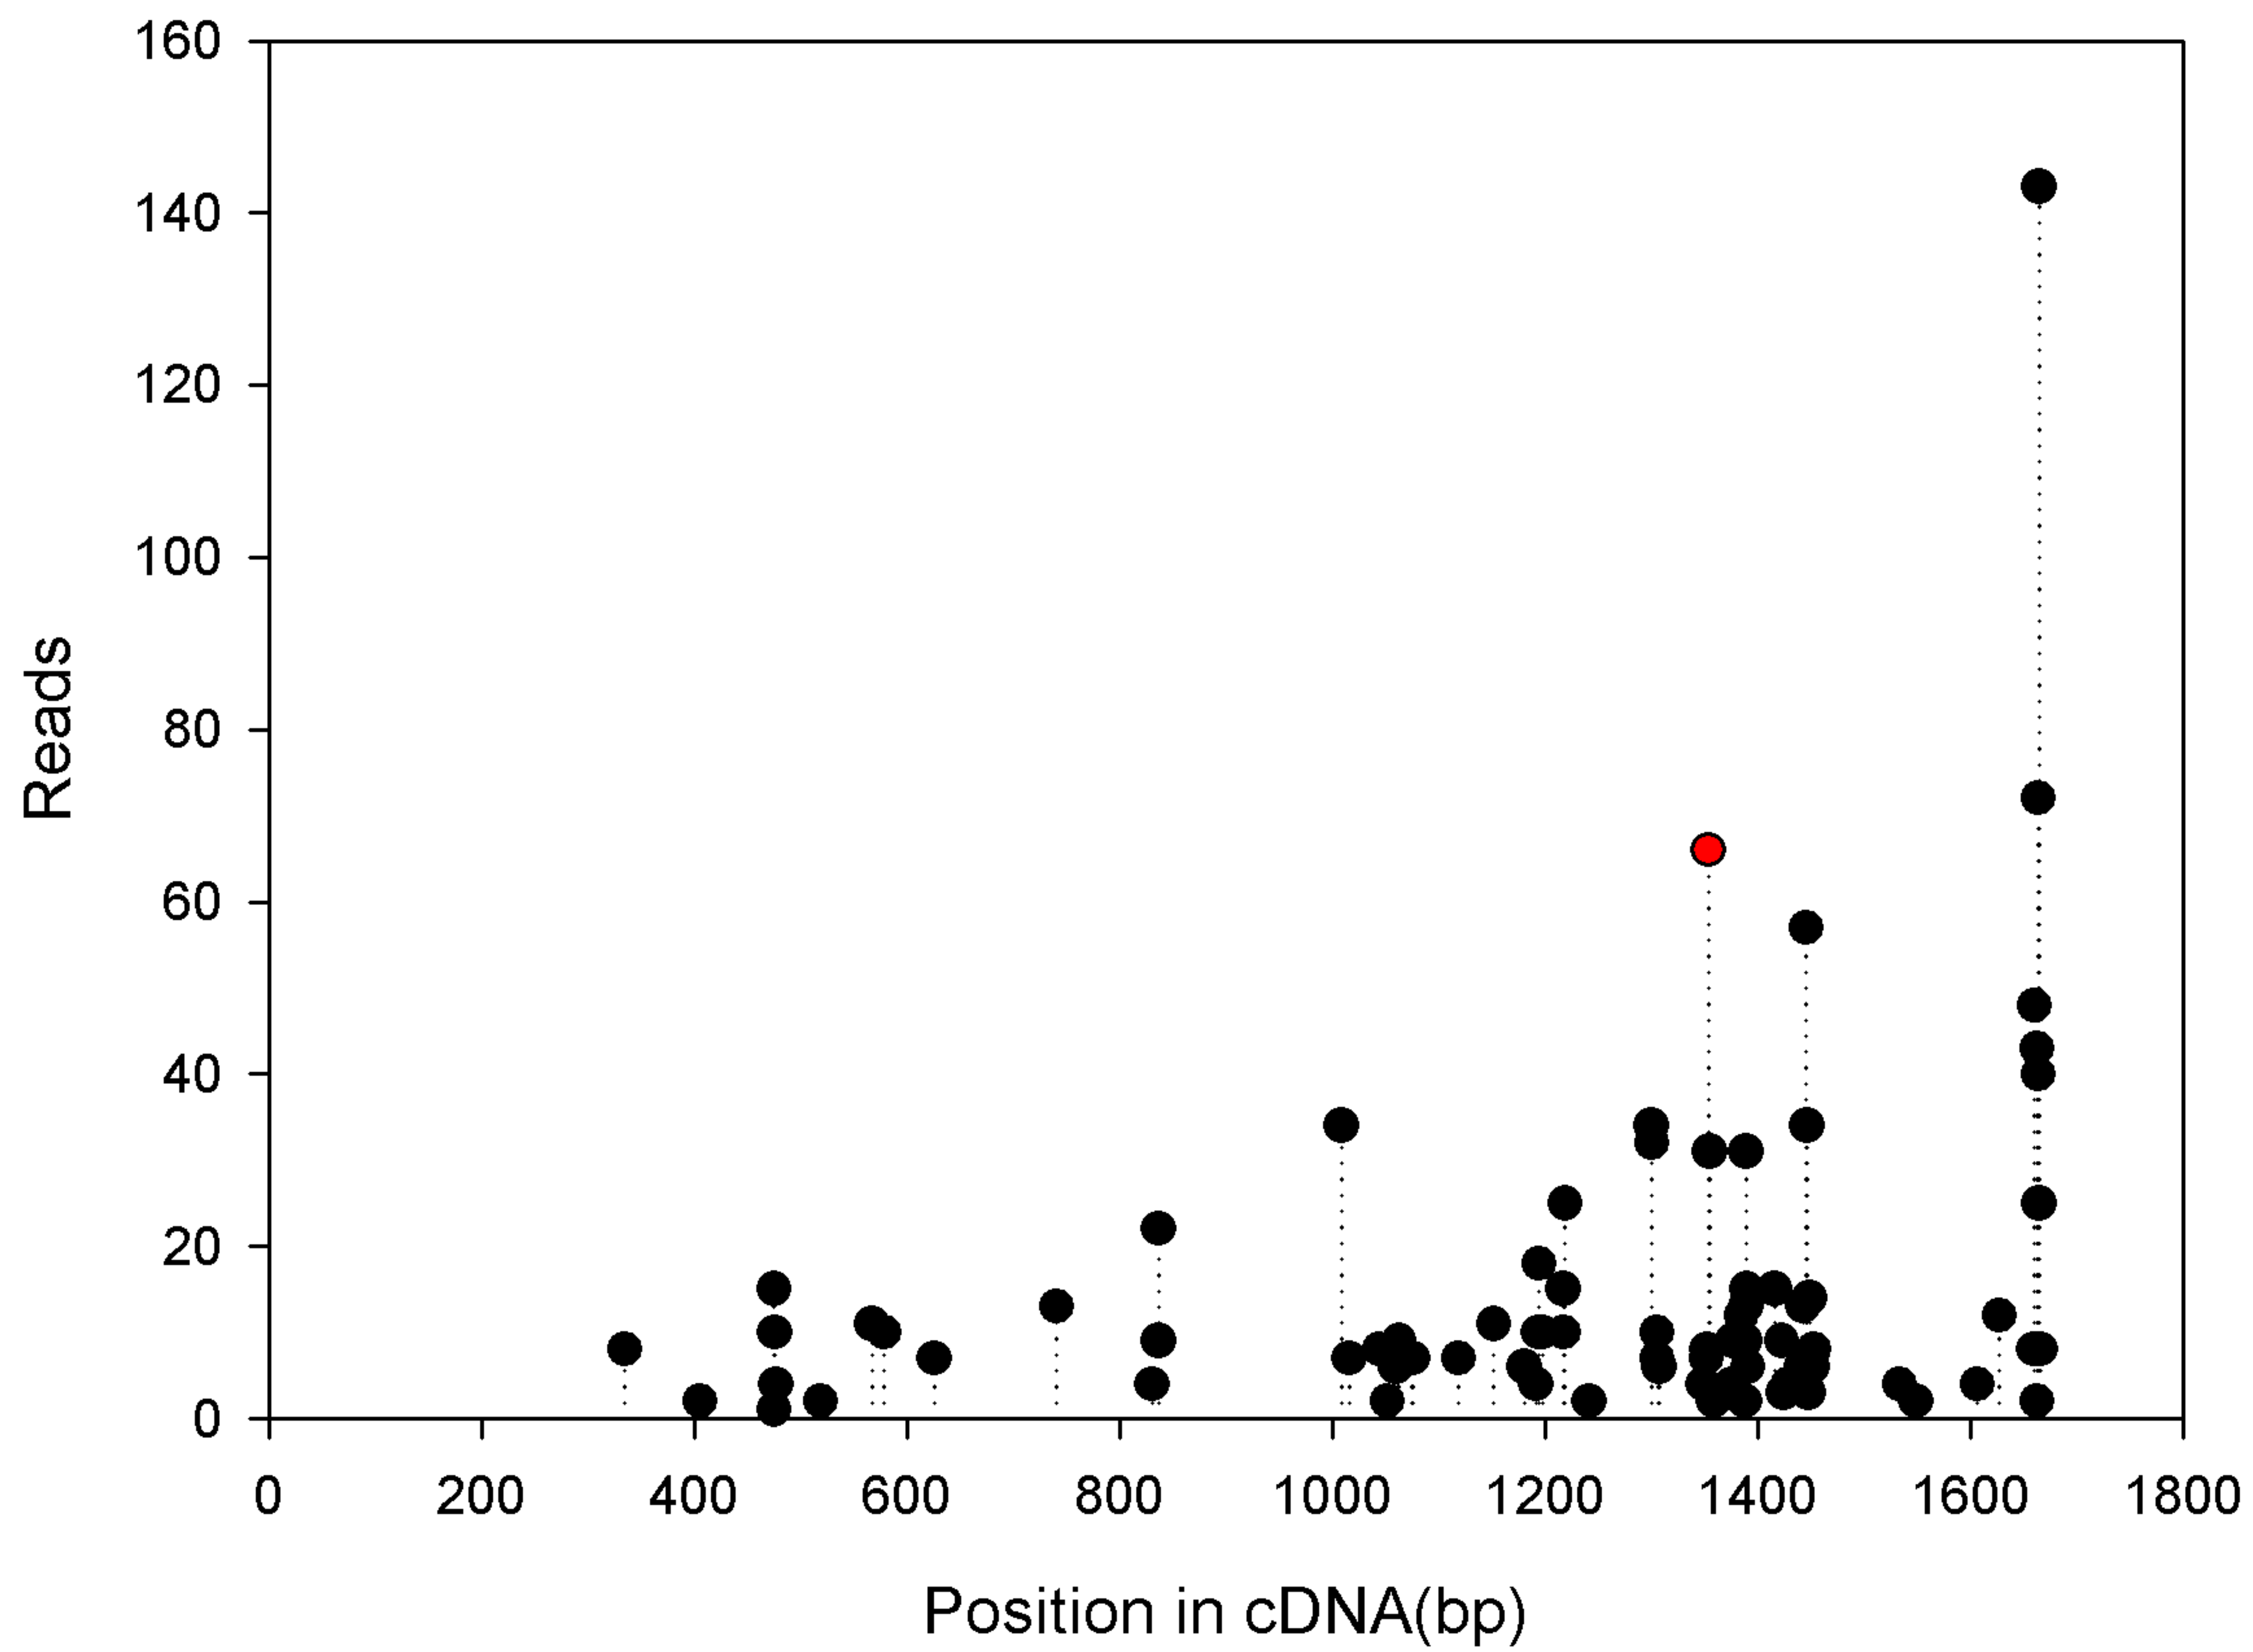

```
5' UGCAAAGUCGGGAACUGUUAUCAUGG 3'
   :: . . . . . : : : : : : : : :
3' --GUUGUAGUCAUUGAUAAUAGU--- 5'
```

```
Orange1.1t00622.1
Csi-miRN20-Cs3g05320.1-24
```

Csi-miRN20-Cs3g05320.1-24, target=Orange1.1t01948.1 gene=Orange1.1t01948

Category:3

Score:4.5

Cleavage site:366

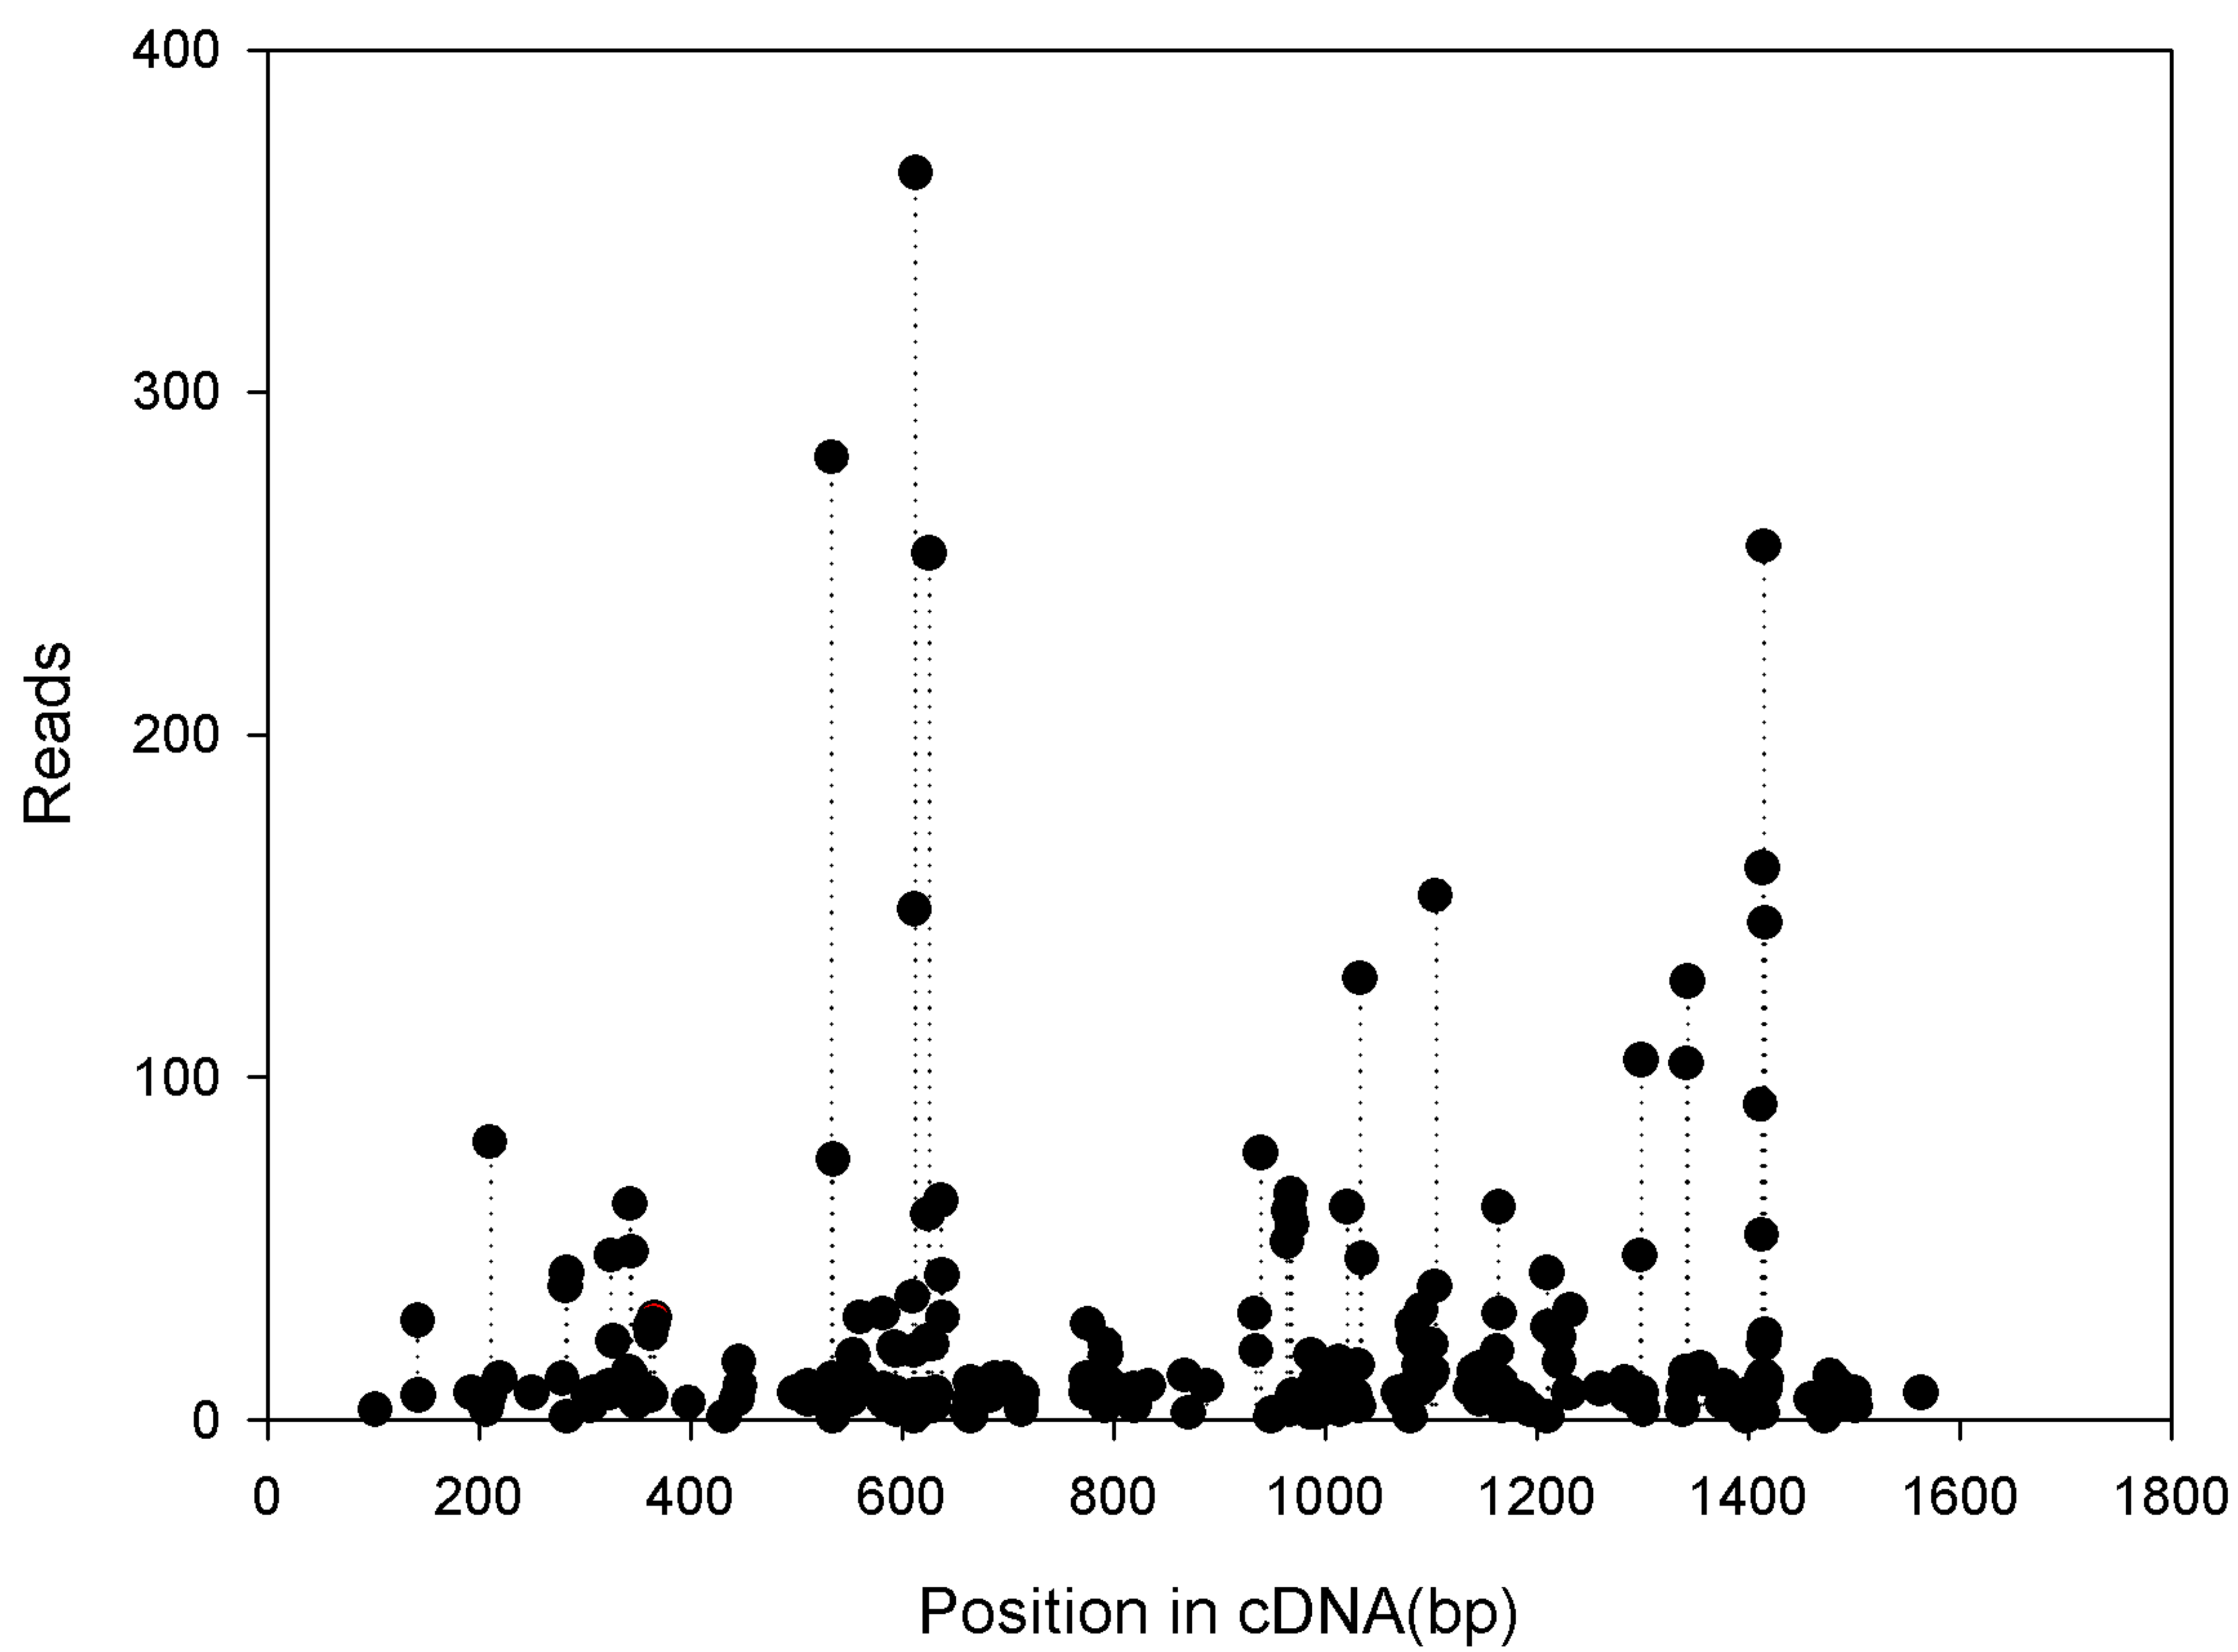

5' AUGUGA-AGCAGUAACUAUUAUUGAAA 3'

Orange1.1t01948.1

... : .....

3' ---GUUGUAGUCAUUGAUAAUAGU--- 5'

Csi-miRN20-Cs3g05320.1-24



Csi-miRN20-Cs3g05320.1-26, target=Cs3g11480.1 gene=Cs3g11480

Category:3

Score:4.5

Cleavage site:227

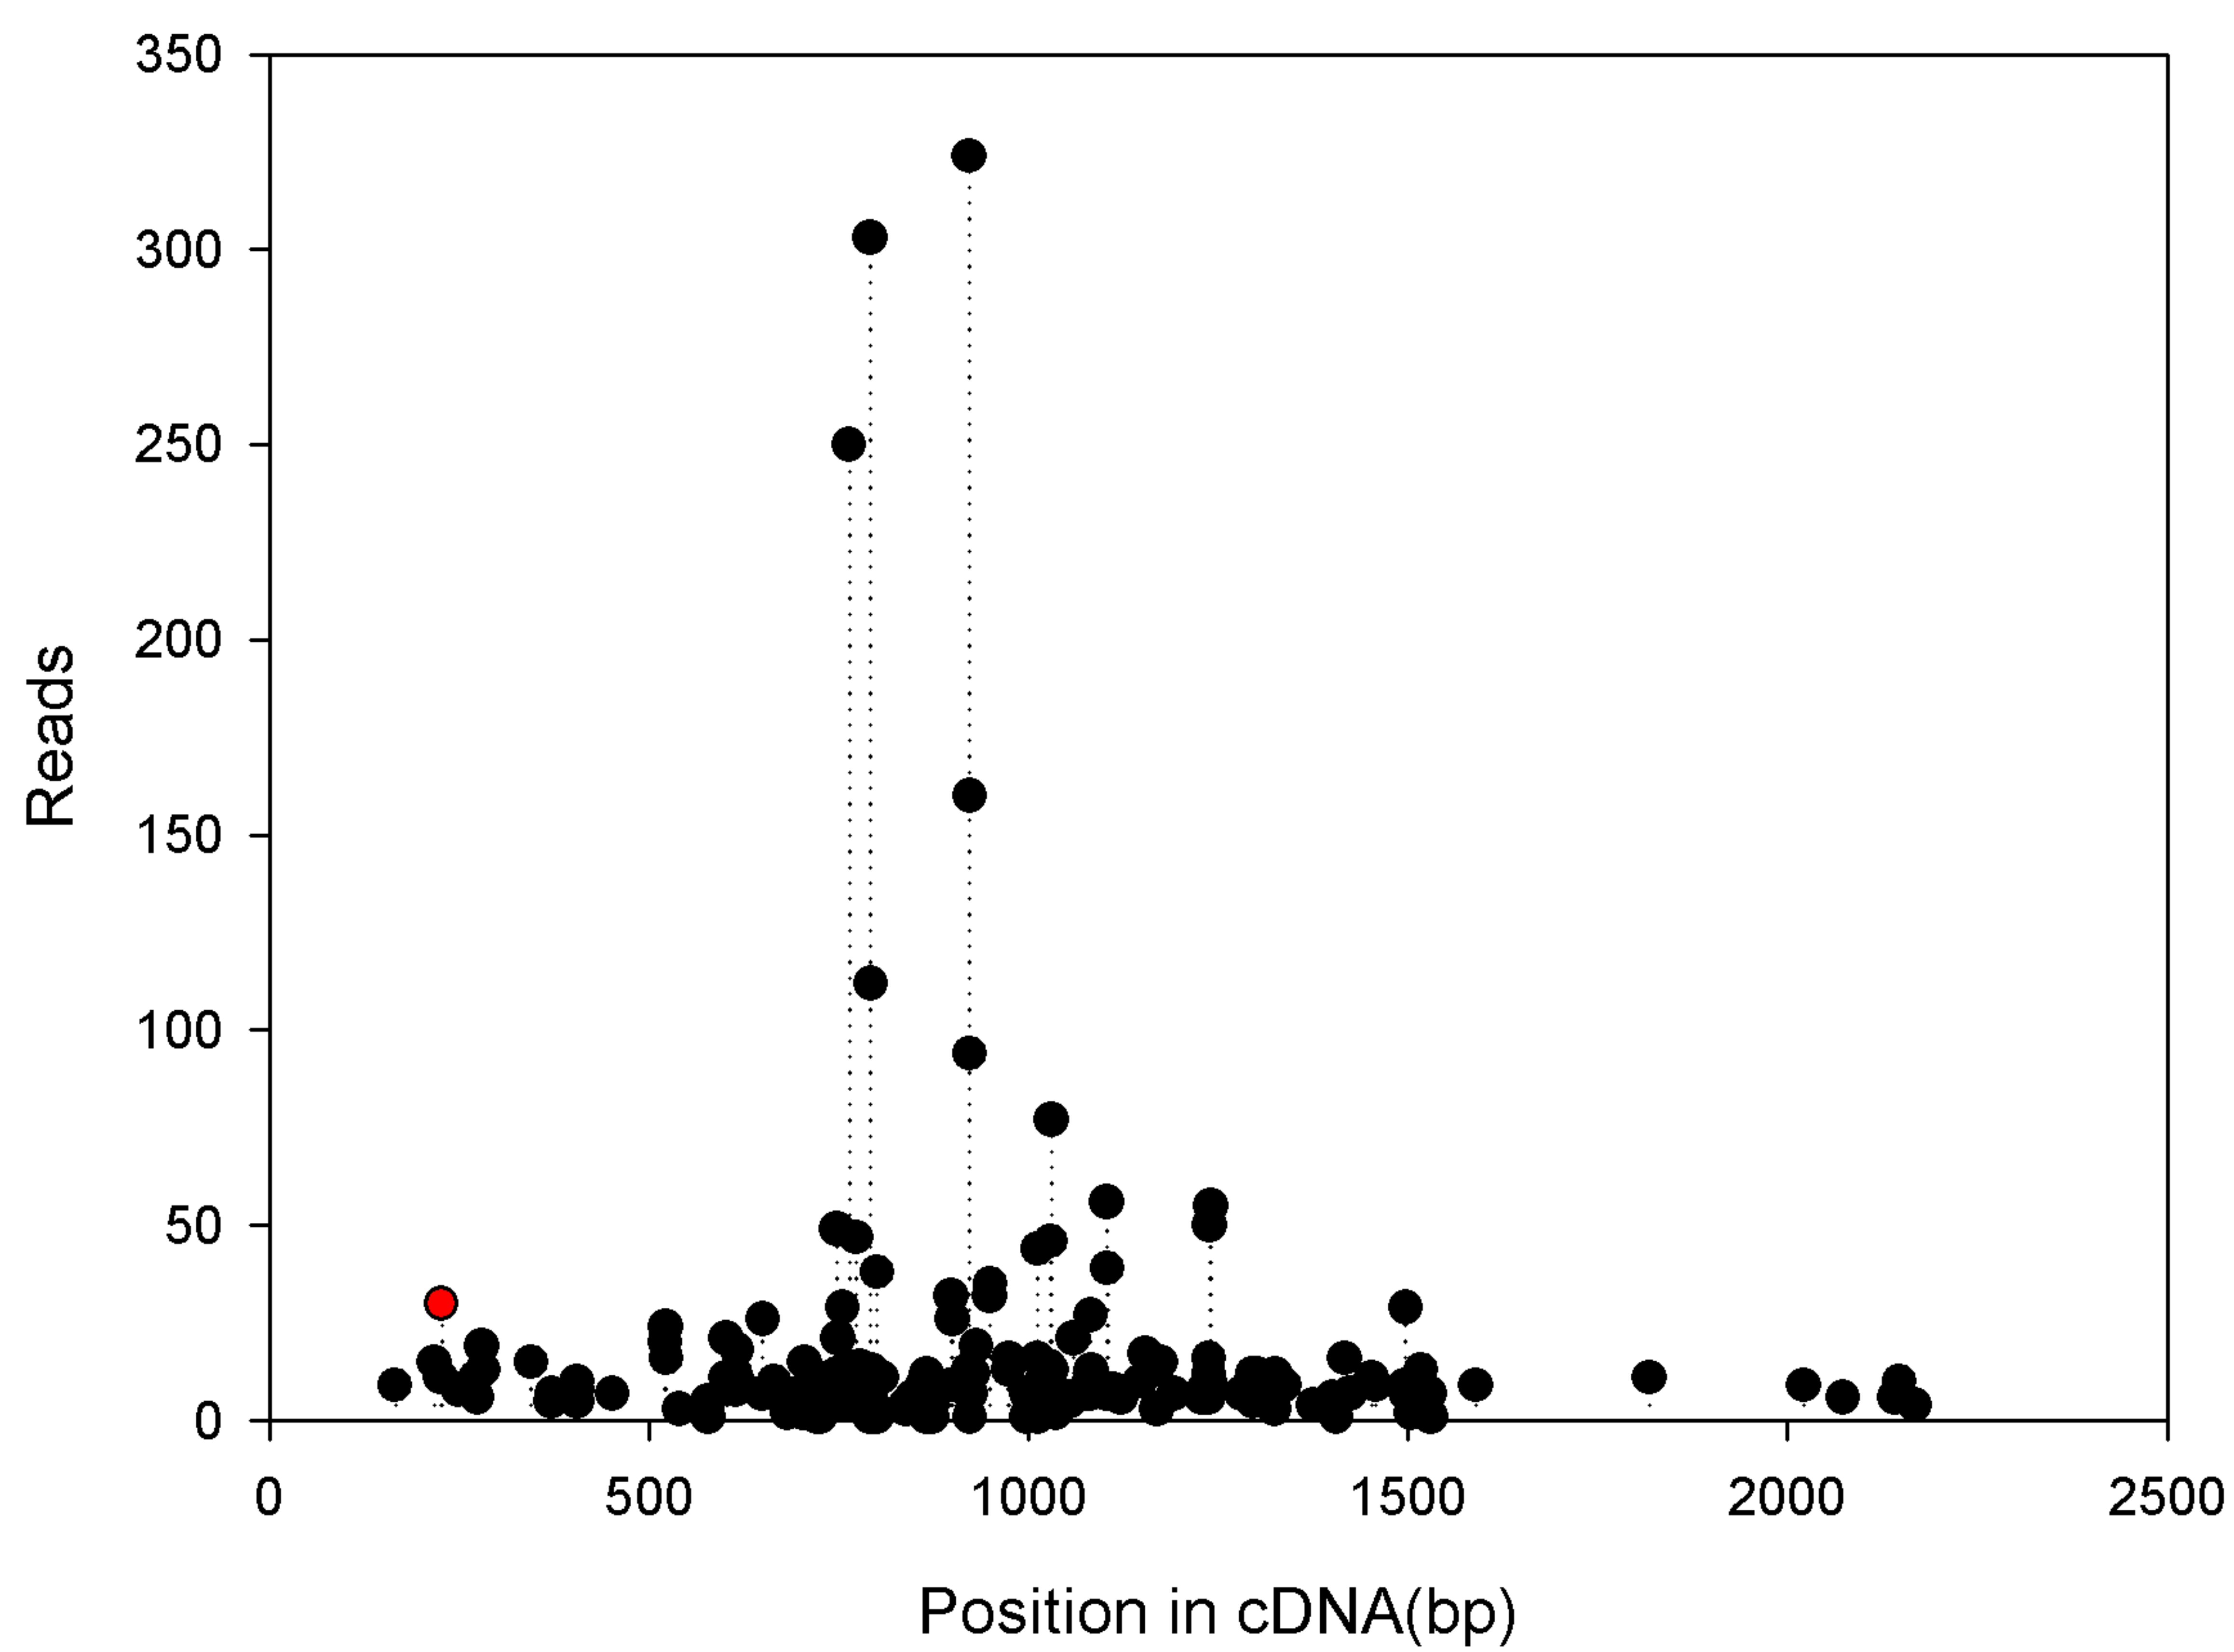

5' UCAAUUUUCU-ACUGUUUUCAGCUGC 3'

Cs3g11480.1

.....

3' -GUUAGAAGAGAGACAAAAGGU----- 5'

Csi-miRN20-Cs3g05320.1-26

Csi-miRN20-Cs3g05320.1-26, target=Cs6g18830.1 gene=Cs6g18830  
 Category:3  
 Score:5  
 Cleavage site:676

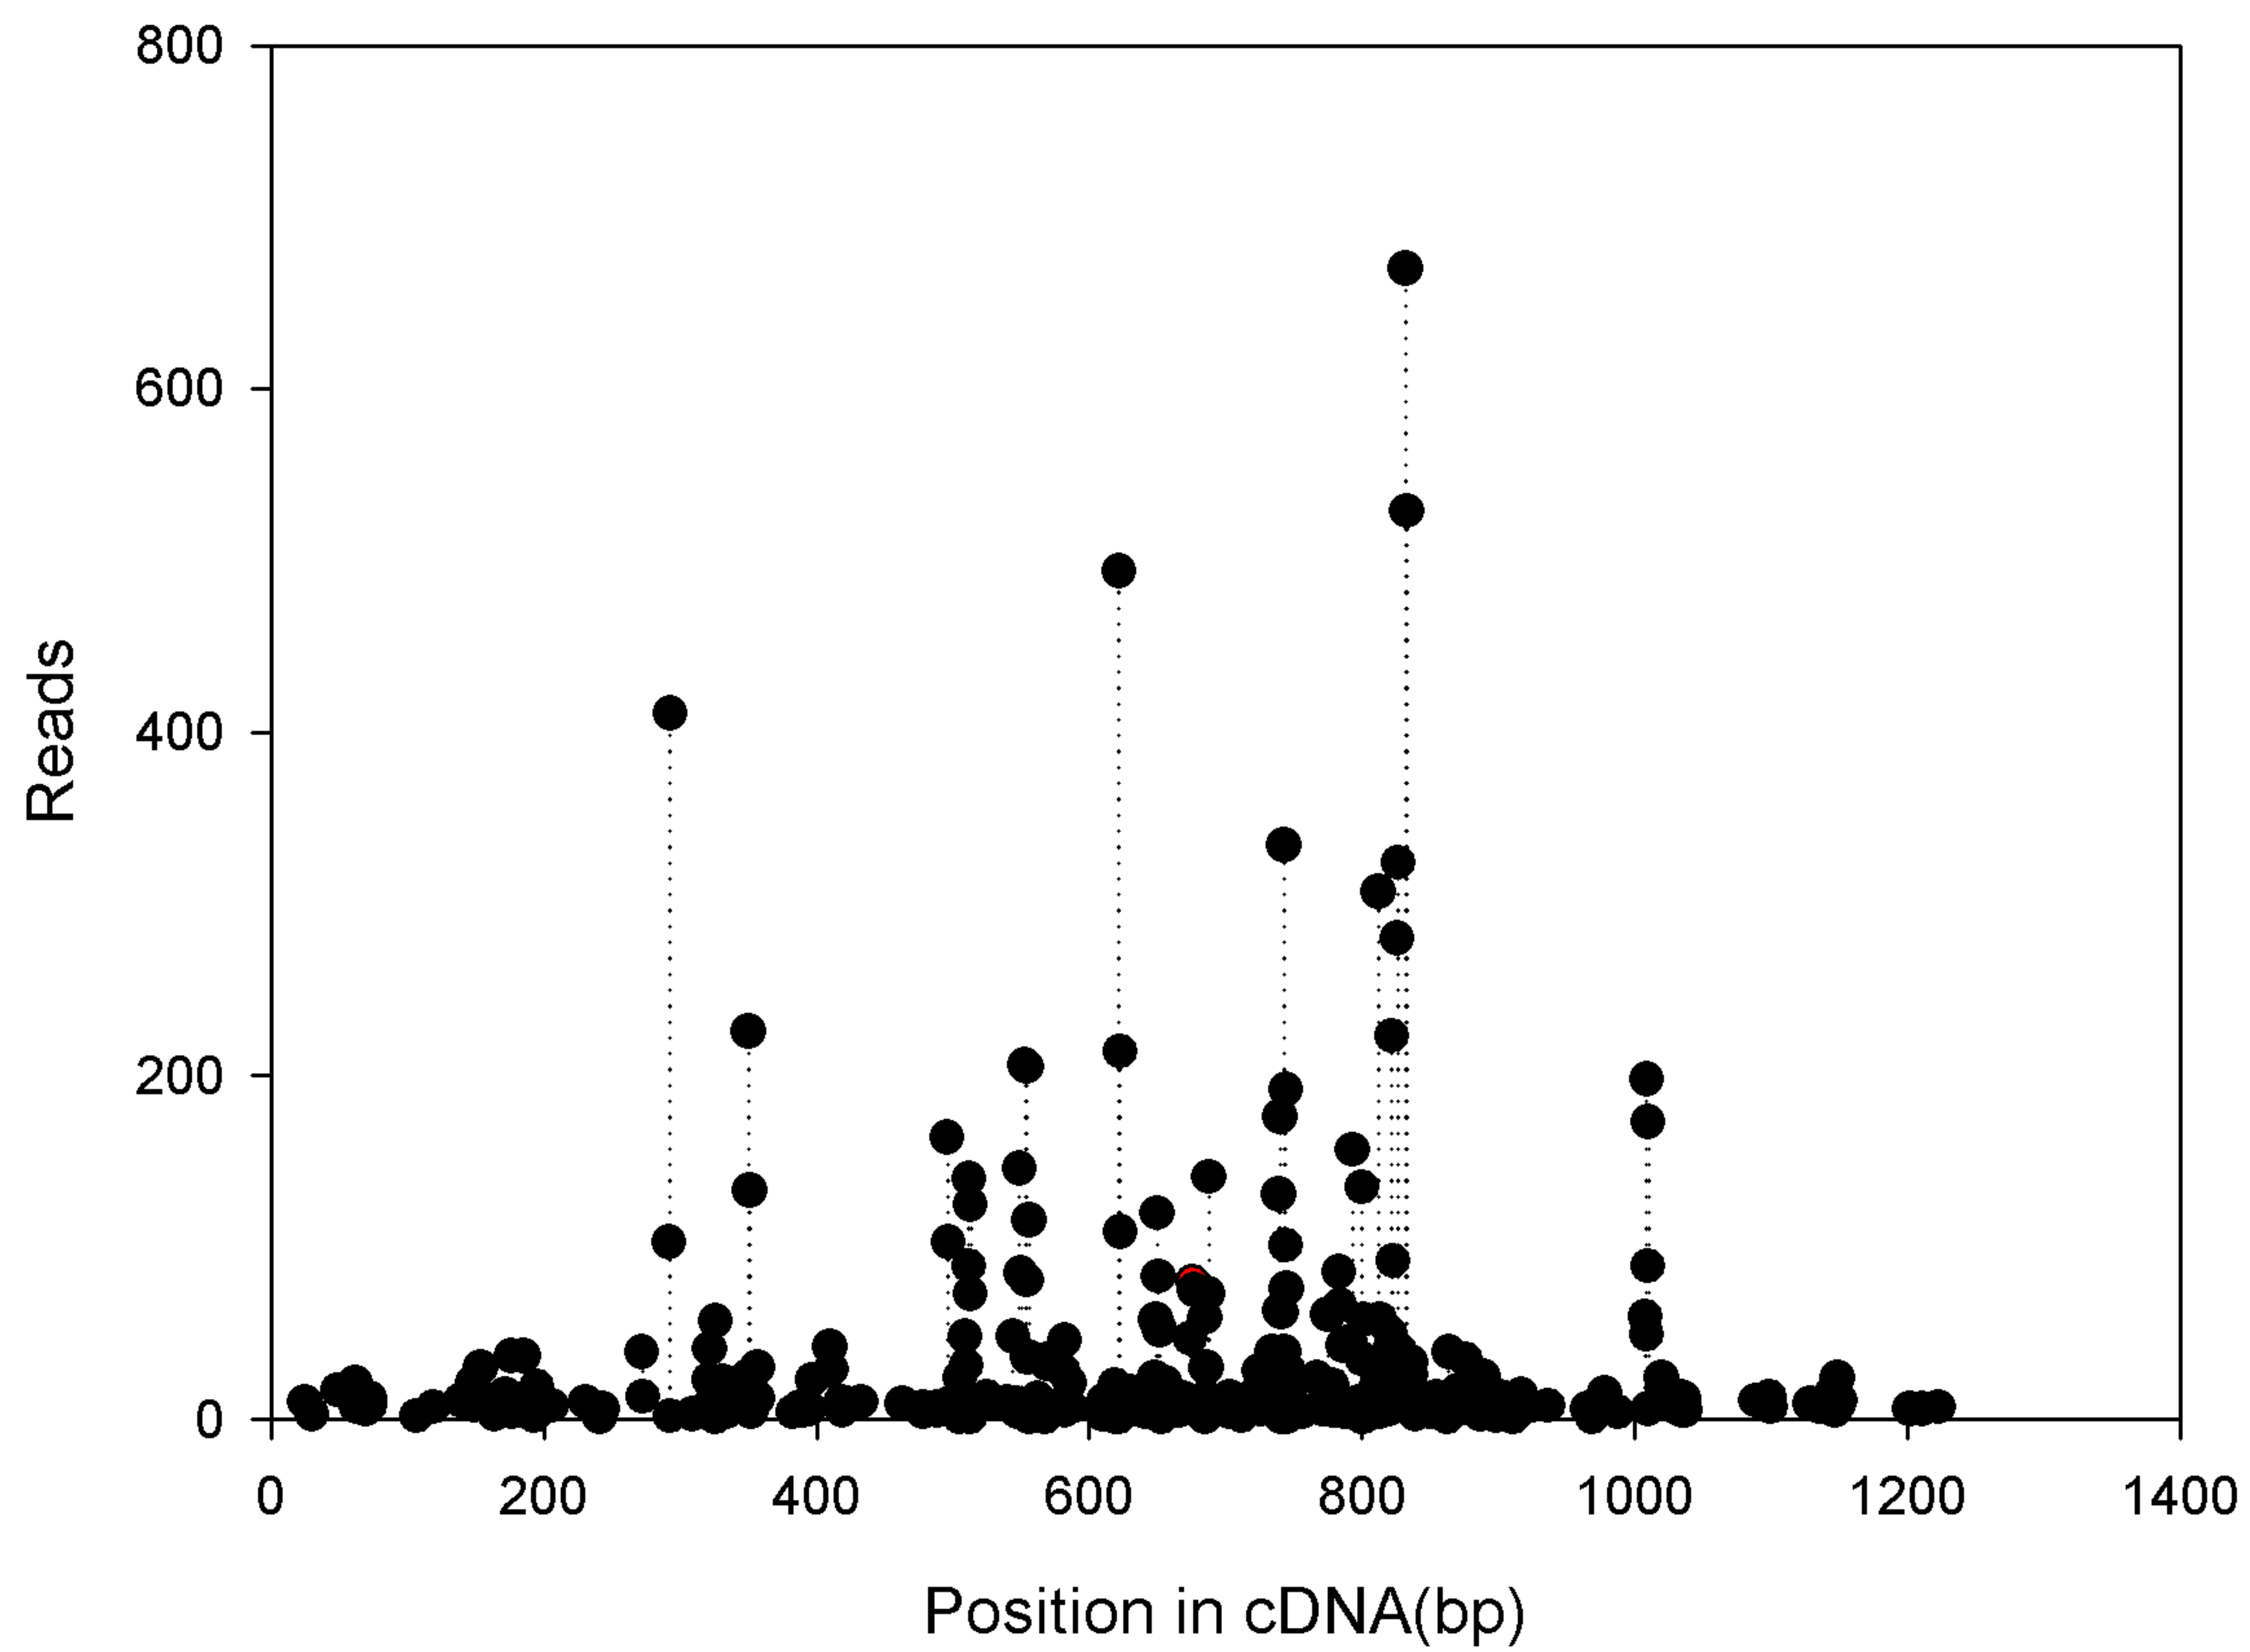

```

5' UGCACUCAACUUCUCUGUUUUCUACU 3'
   :: :: : ::::::::::::::::::::
3' --GUUAGAAG-AGAGACAAAAGGU-- 5'
  
```

Cs6g18830.1

Csi-miRN20-Cs3g05320.1-26

Csi-miRN20-Cs3g05320.1-4, target=Cs5g05630.1 gene=Cs5g05630

Category:2

Score:5

Cleavage site:1096

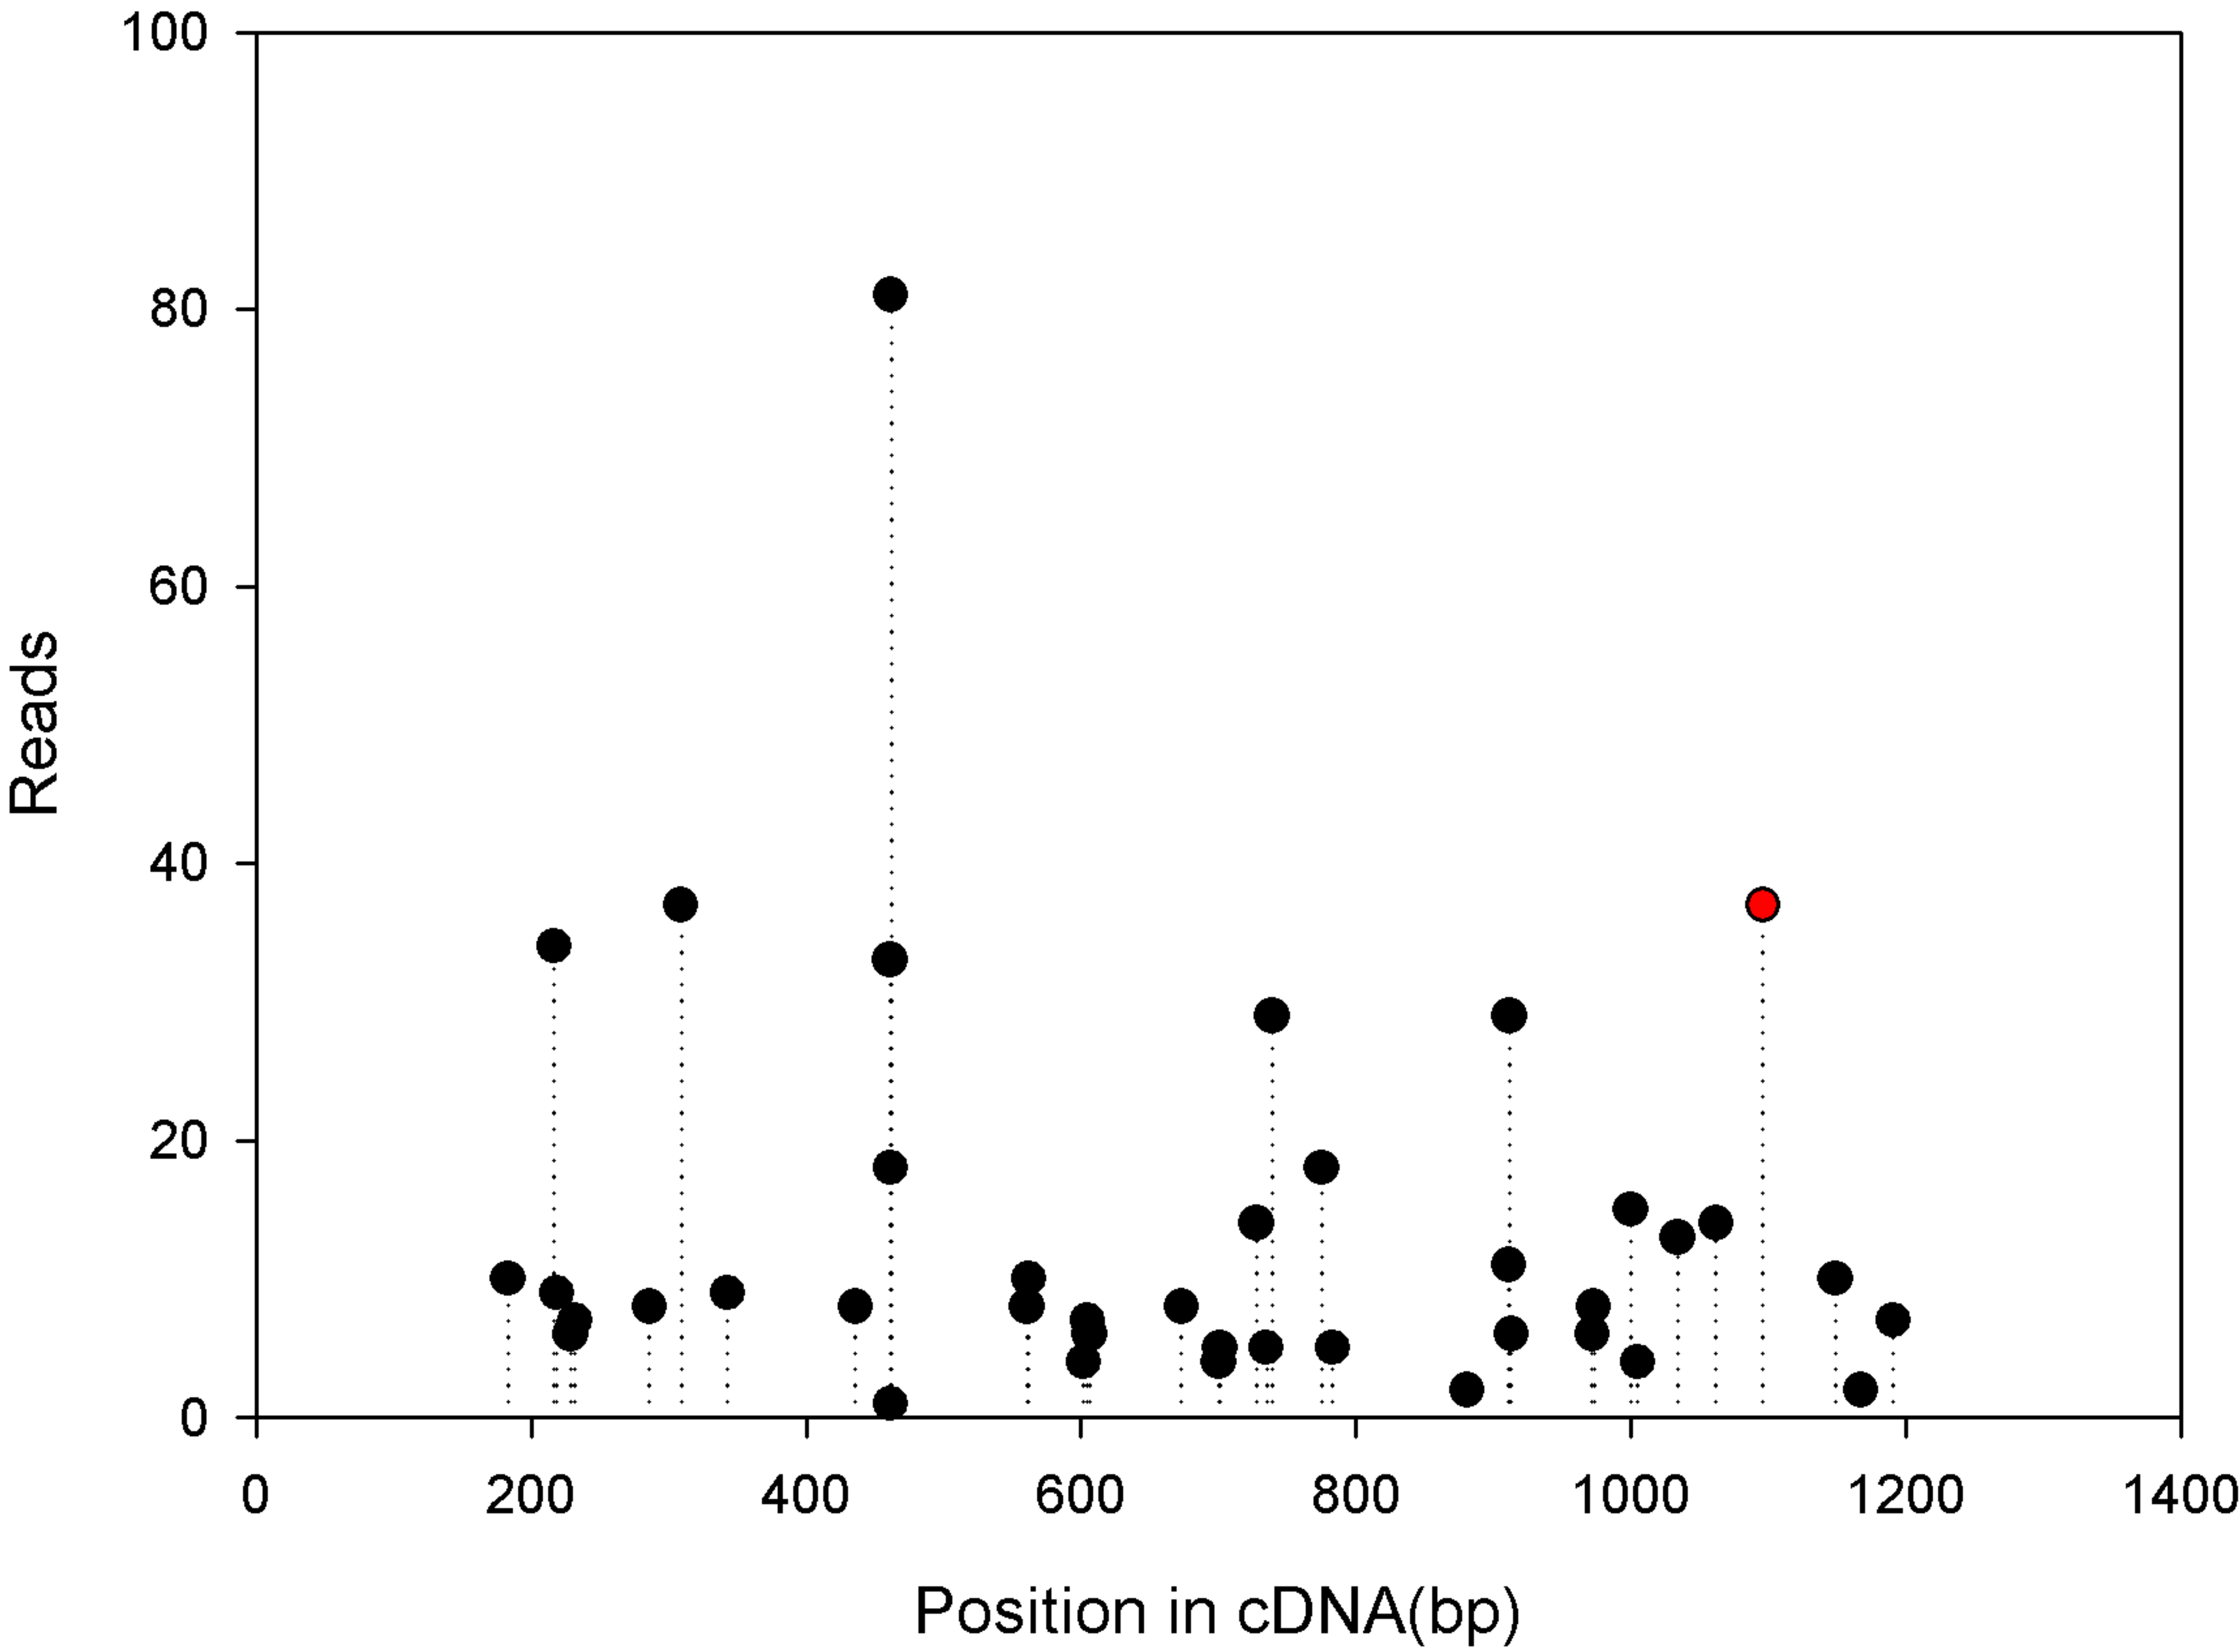

5' GAAAUUAAUUAUCUAUGAUUUUGCUU 3'  
 ::: :::: ::::::::::::  
 3' ----CAUU-AUAGUUACUAAAUGAA 5'

Cs5g05630.1

Csi-miRN20-Cs3g05320.1-4

Csi-miRN20-Cs3g05320.1-4, target=Cs5g18400.1 gene=Cs5g18400  
 Category:2  
 Score:5  
 Cleavage site:729

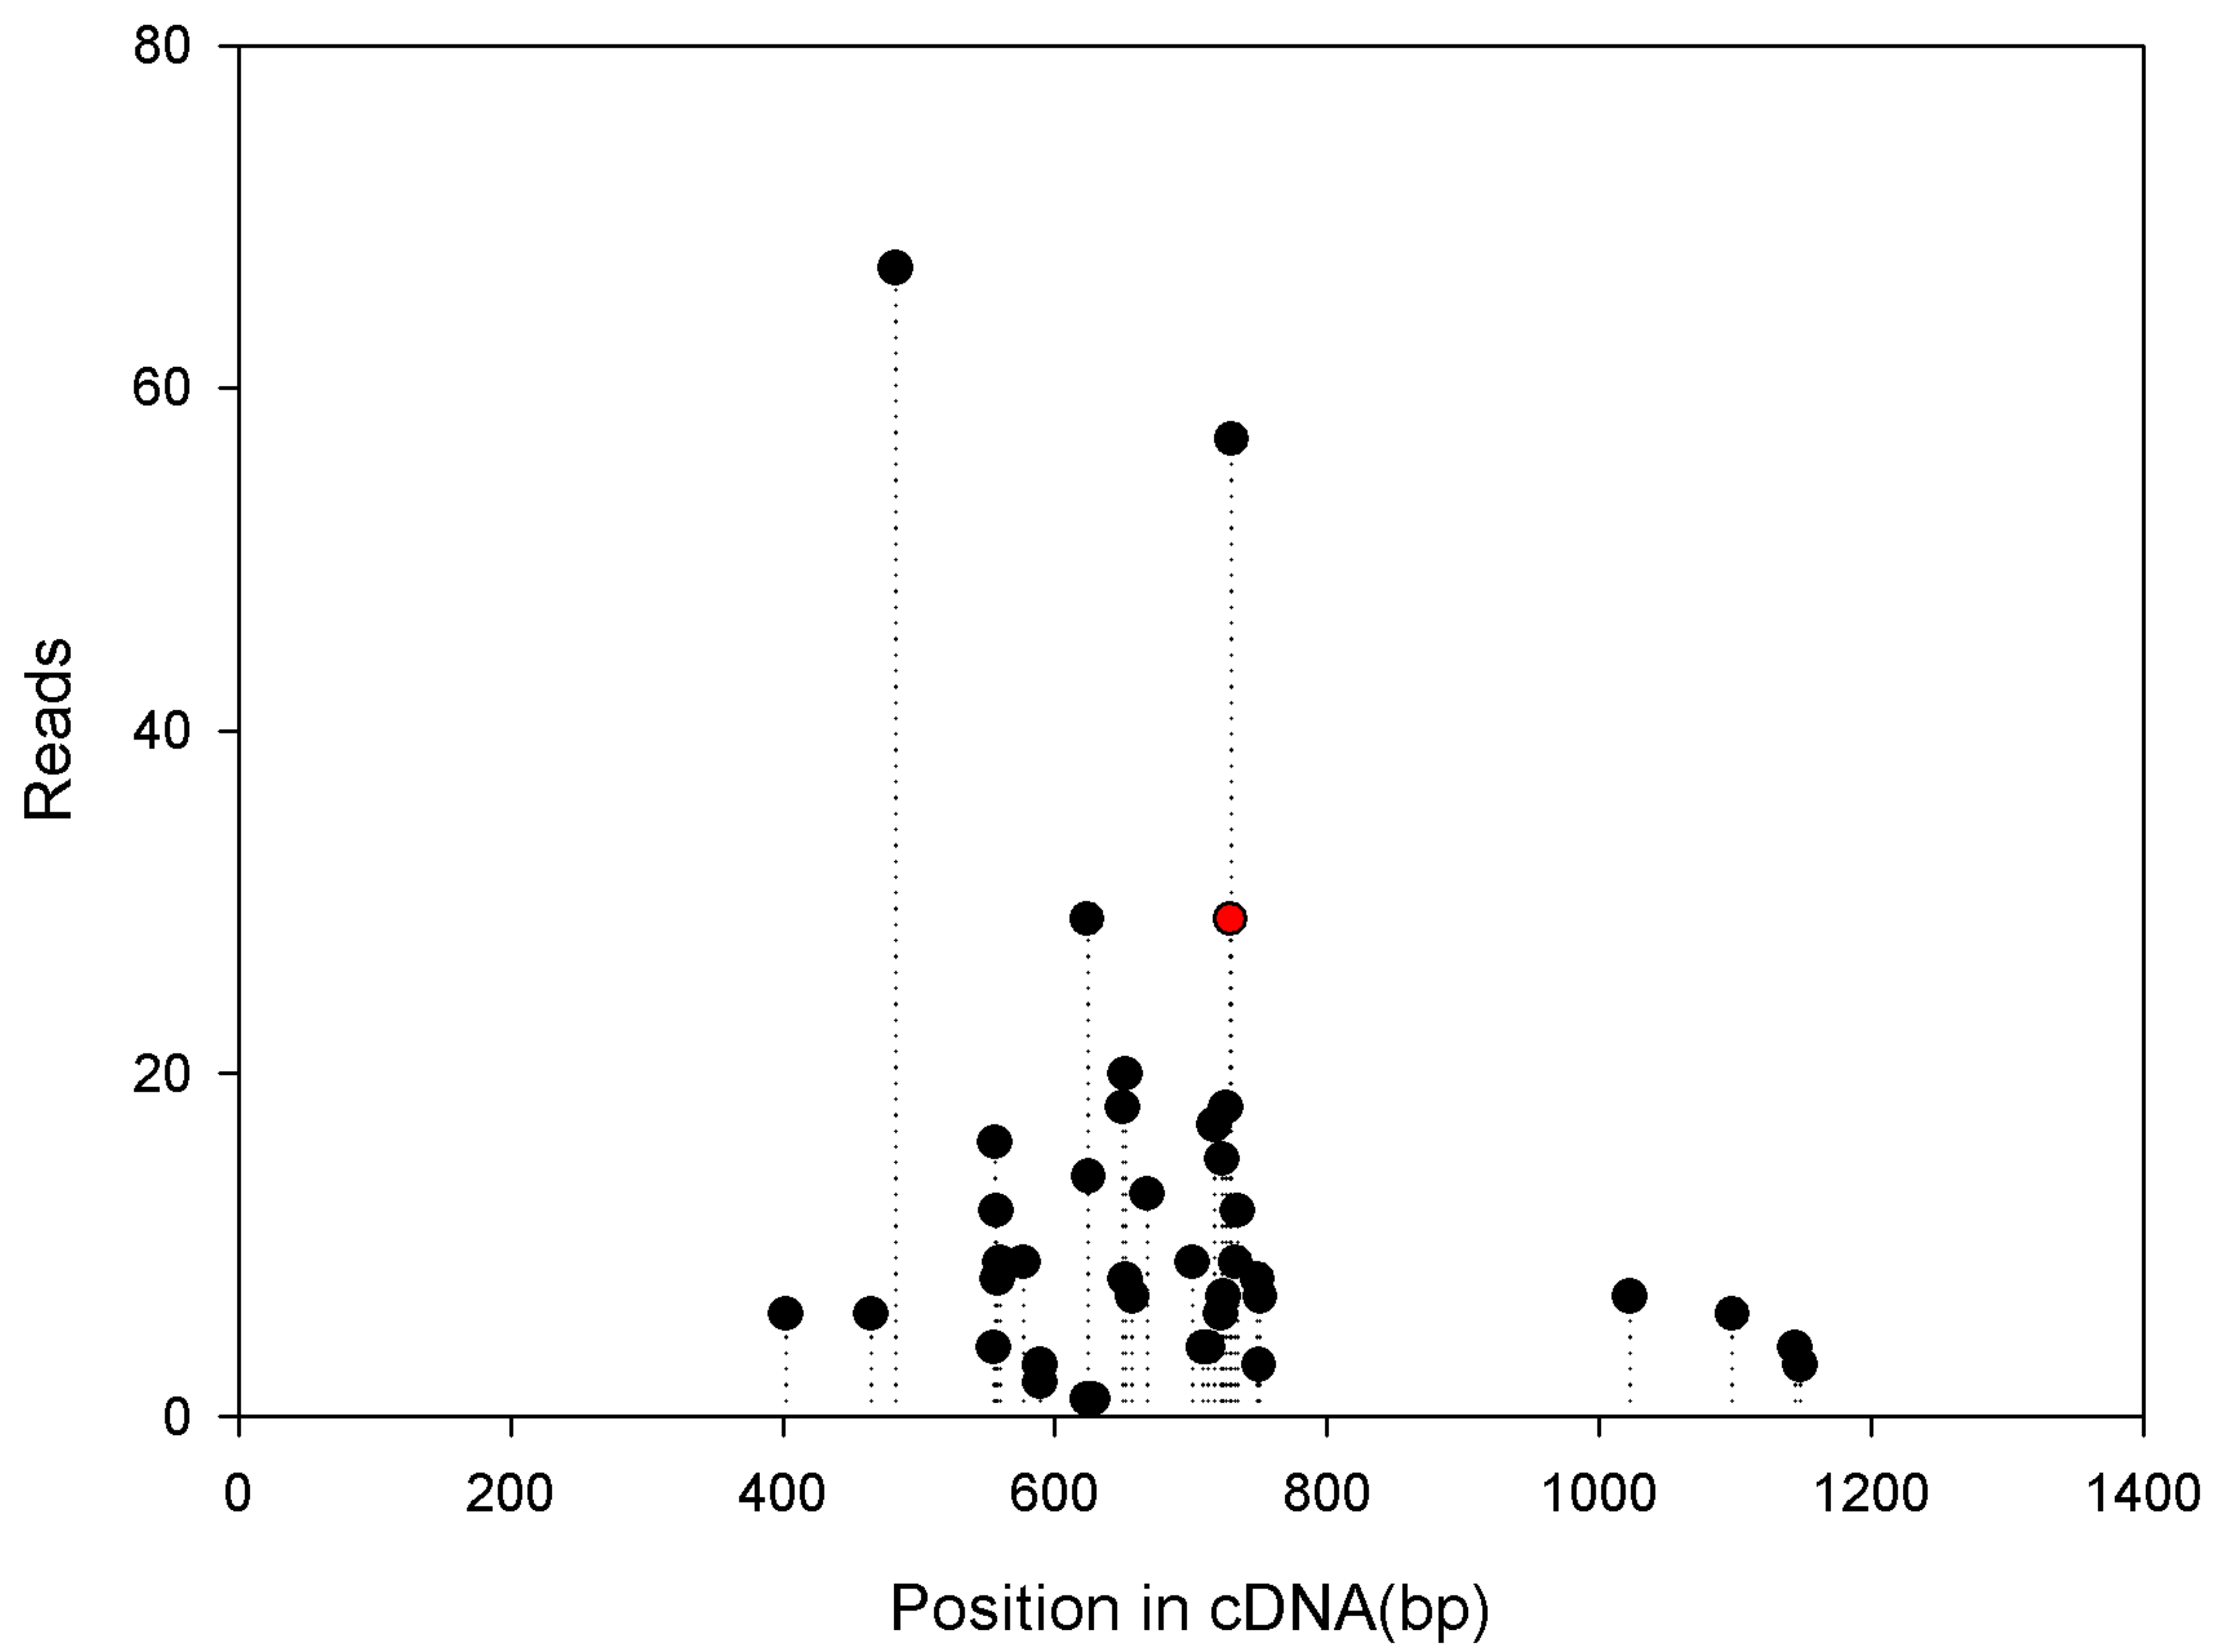

5' CUGAUUUAUGAAUUUUACUGUGAA 3'  
 ::::::::::: :::::::::::  
 3' CAUUAUAGUUAC-UAAAAUGAA---- 5'

Cs5g18400.1

Csi-miRN20-Cs3g05320.1-4



**T-plots for targets of  
secondary siRNAs  
in fruit**

Csi-miR482a-3p-Cs1g15550.1-4, target=Cs8g11330.1 gene=Cs8g11330  
 Category:3  
 Score:5  
 Cleavage site:15

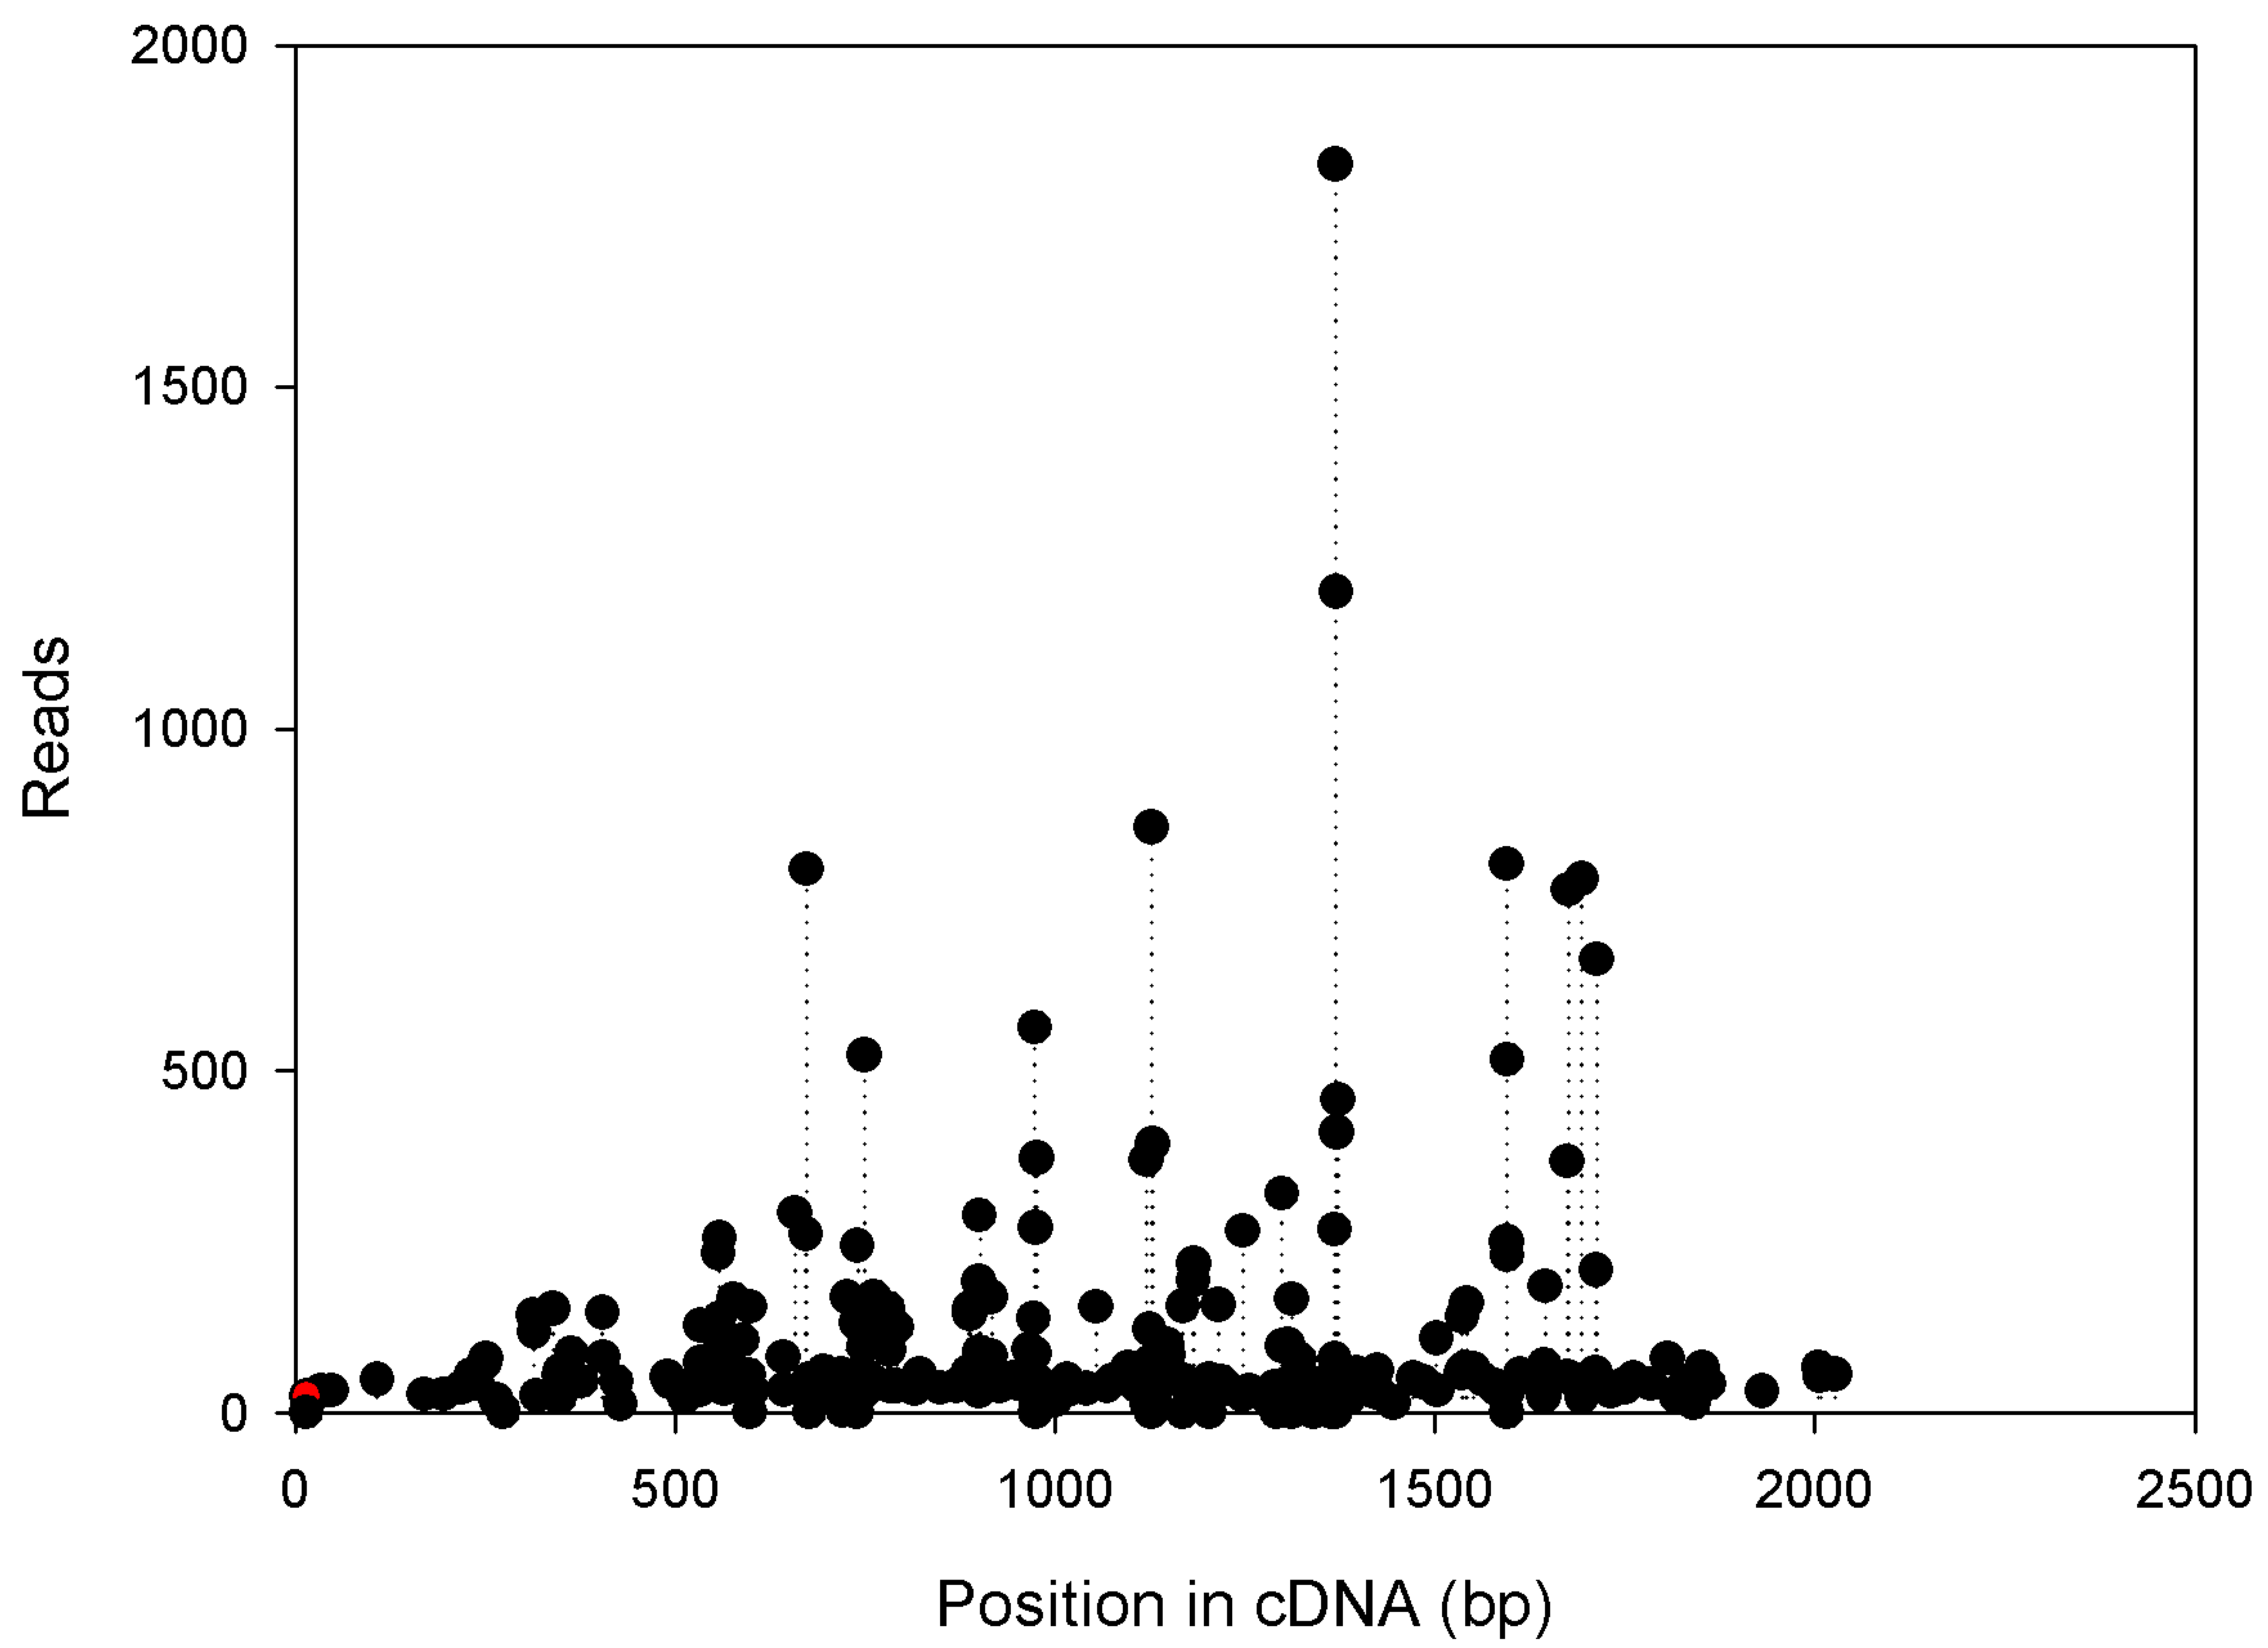

```
5' CAGAAGACACACACACAUCUUCU 3'
   : : : : : : : : : : : :
3' ----UAUGUGUGUGGGUGUAGGAAU- 5'
```

Cs8g11330.1

Csi-miR482a-3p-Cs1g15550.1-4

Csi-miR482a-3p-Cs3g13340.1-20, target=Cs1g07080.1 gene=Cs1g07080

Category:3

Score:5

Cleavage site:930

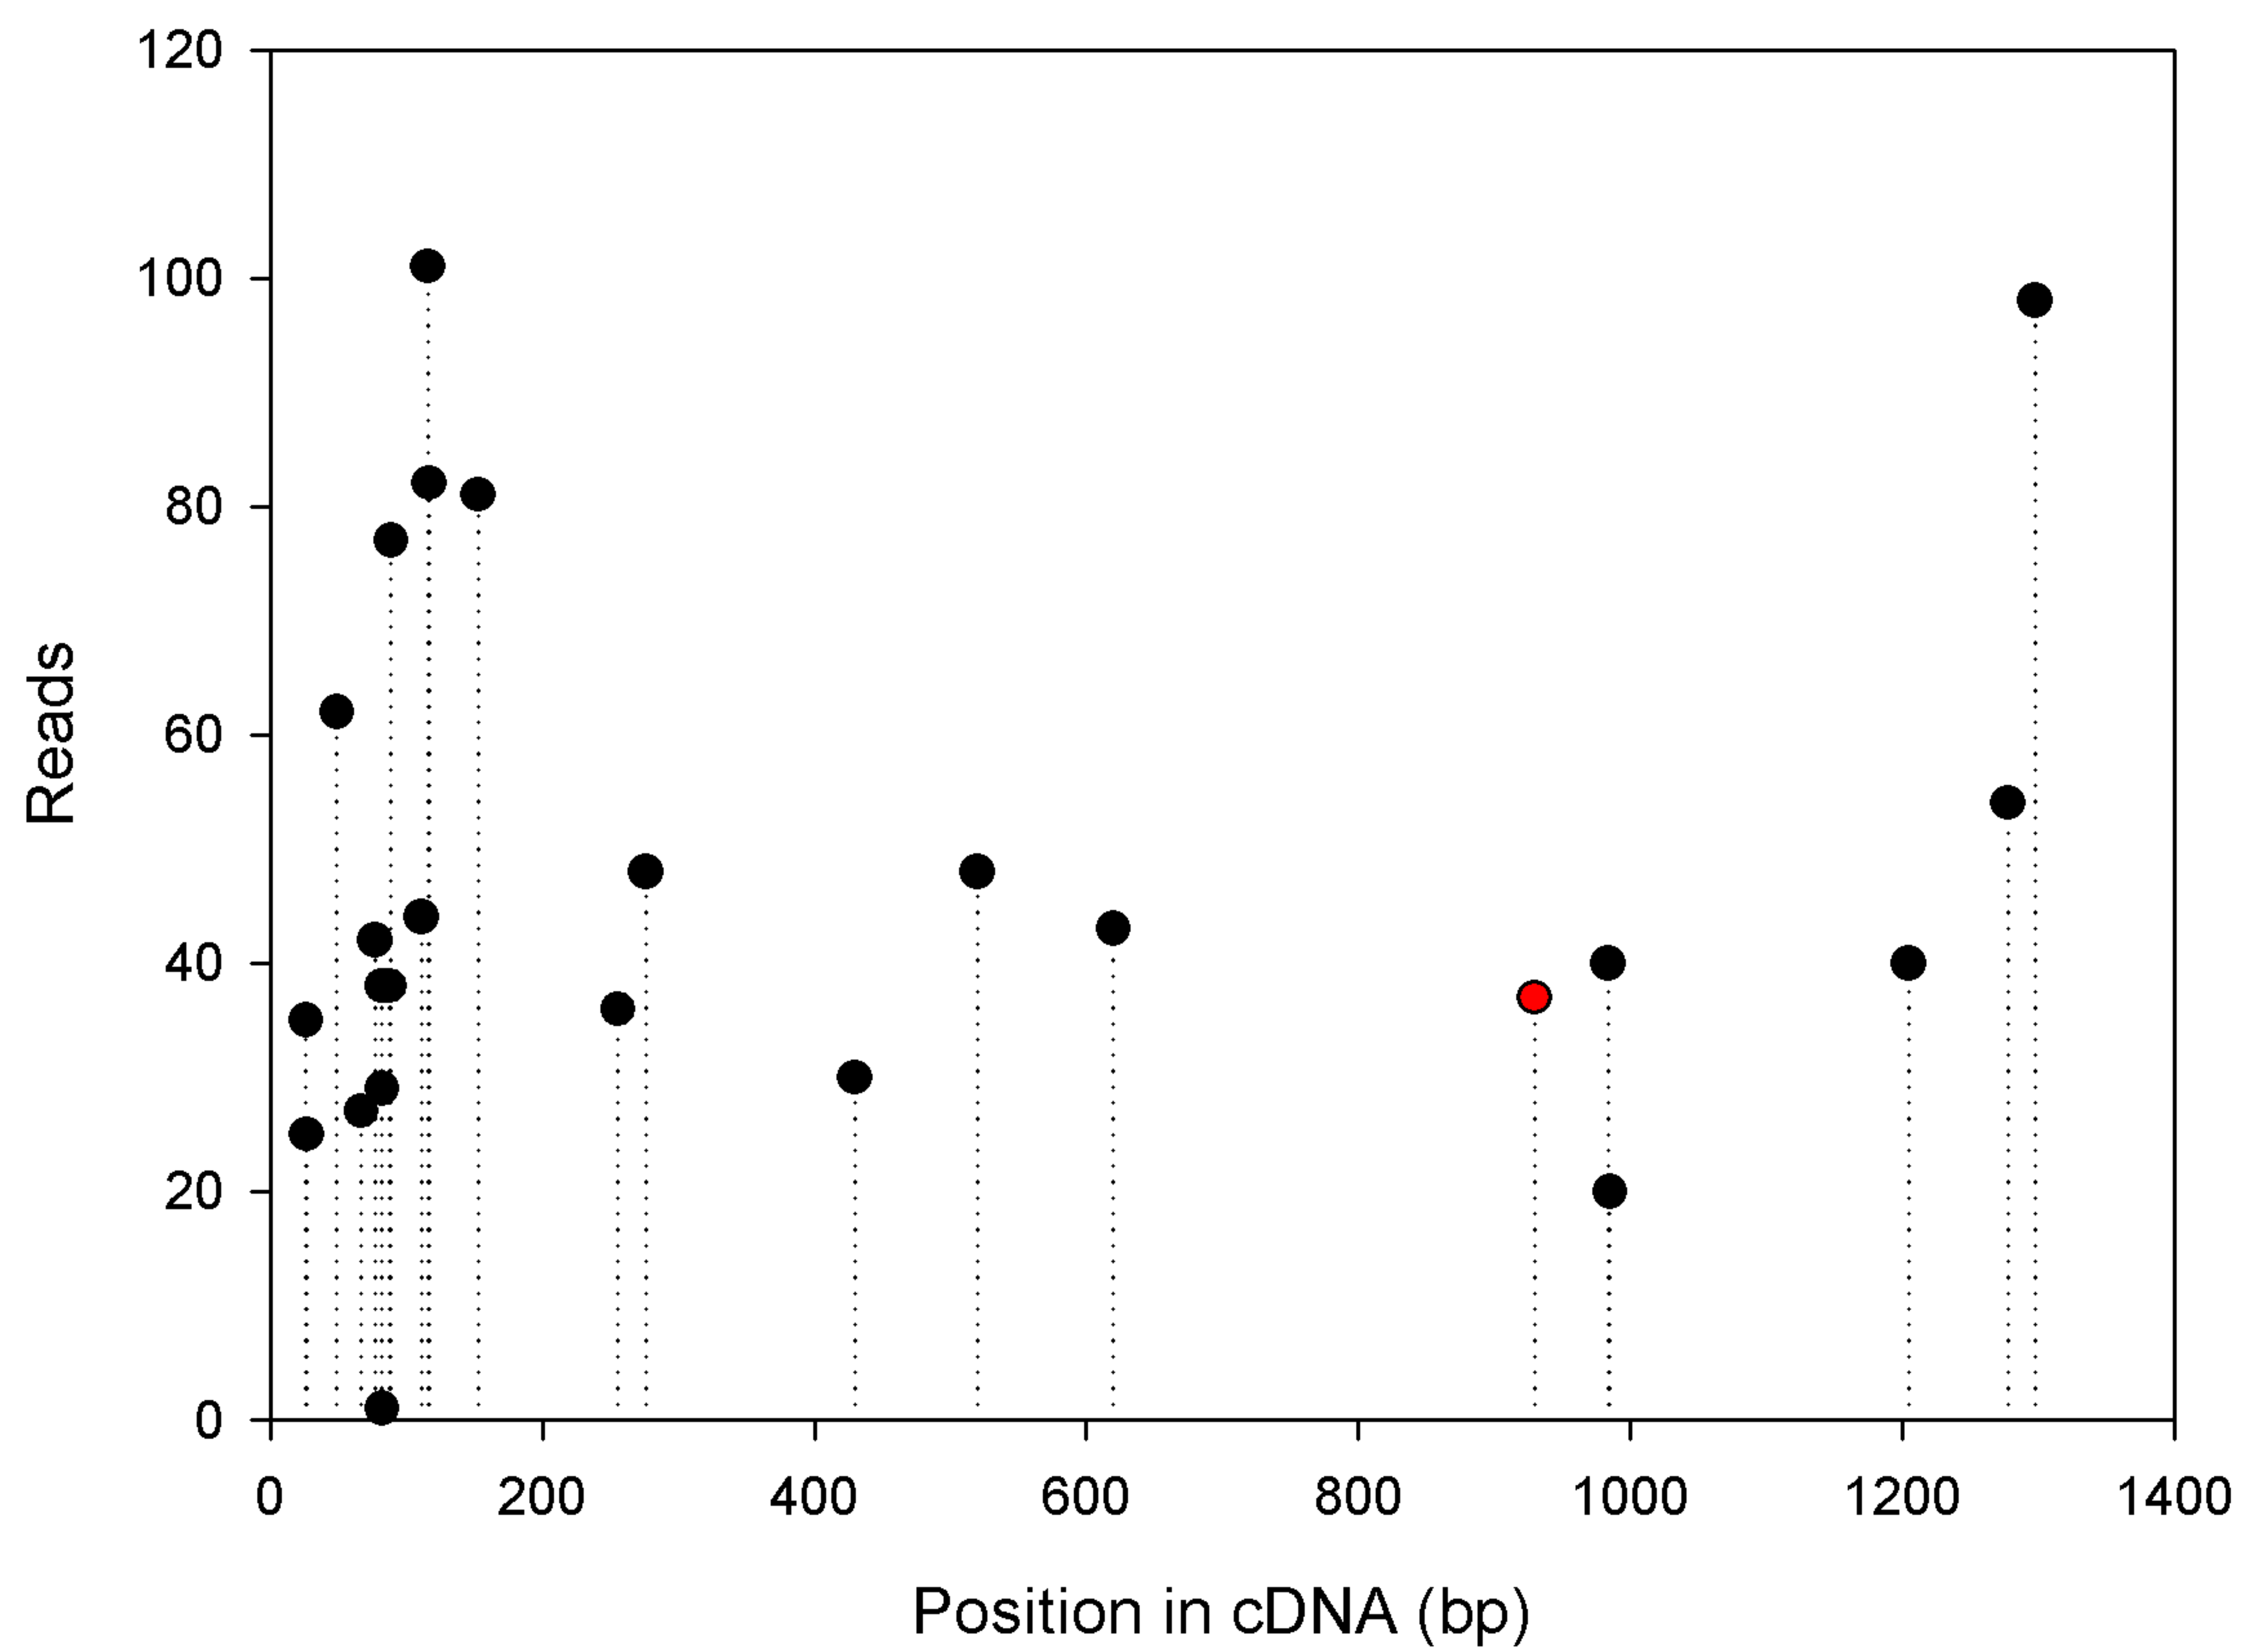

5' UGCAGAGUG-GAAUGGCUCAAGCAAUG 3'

Cs1g07080.1

.....

3' ---UUUUACGGUUGCCGAGUUUGU--- 5'

Csi-miR482a-3p-Cs3g13340.1-20



Csi-miR482a-3p-Cs3g13340.1-20, target=Cs2g11470.1 gene=Cs2g11470  
 Category:3  
 Score:3  
 Cleavage site:1751

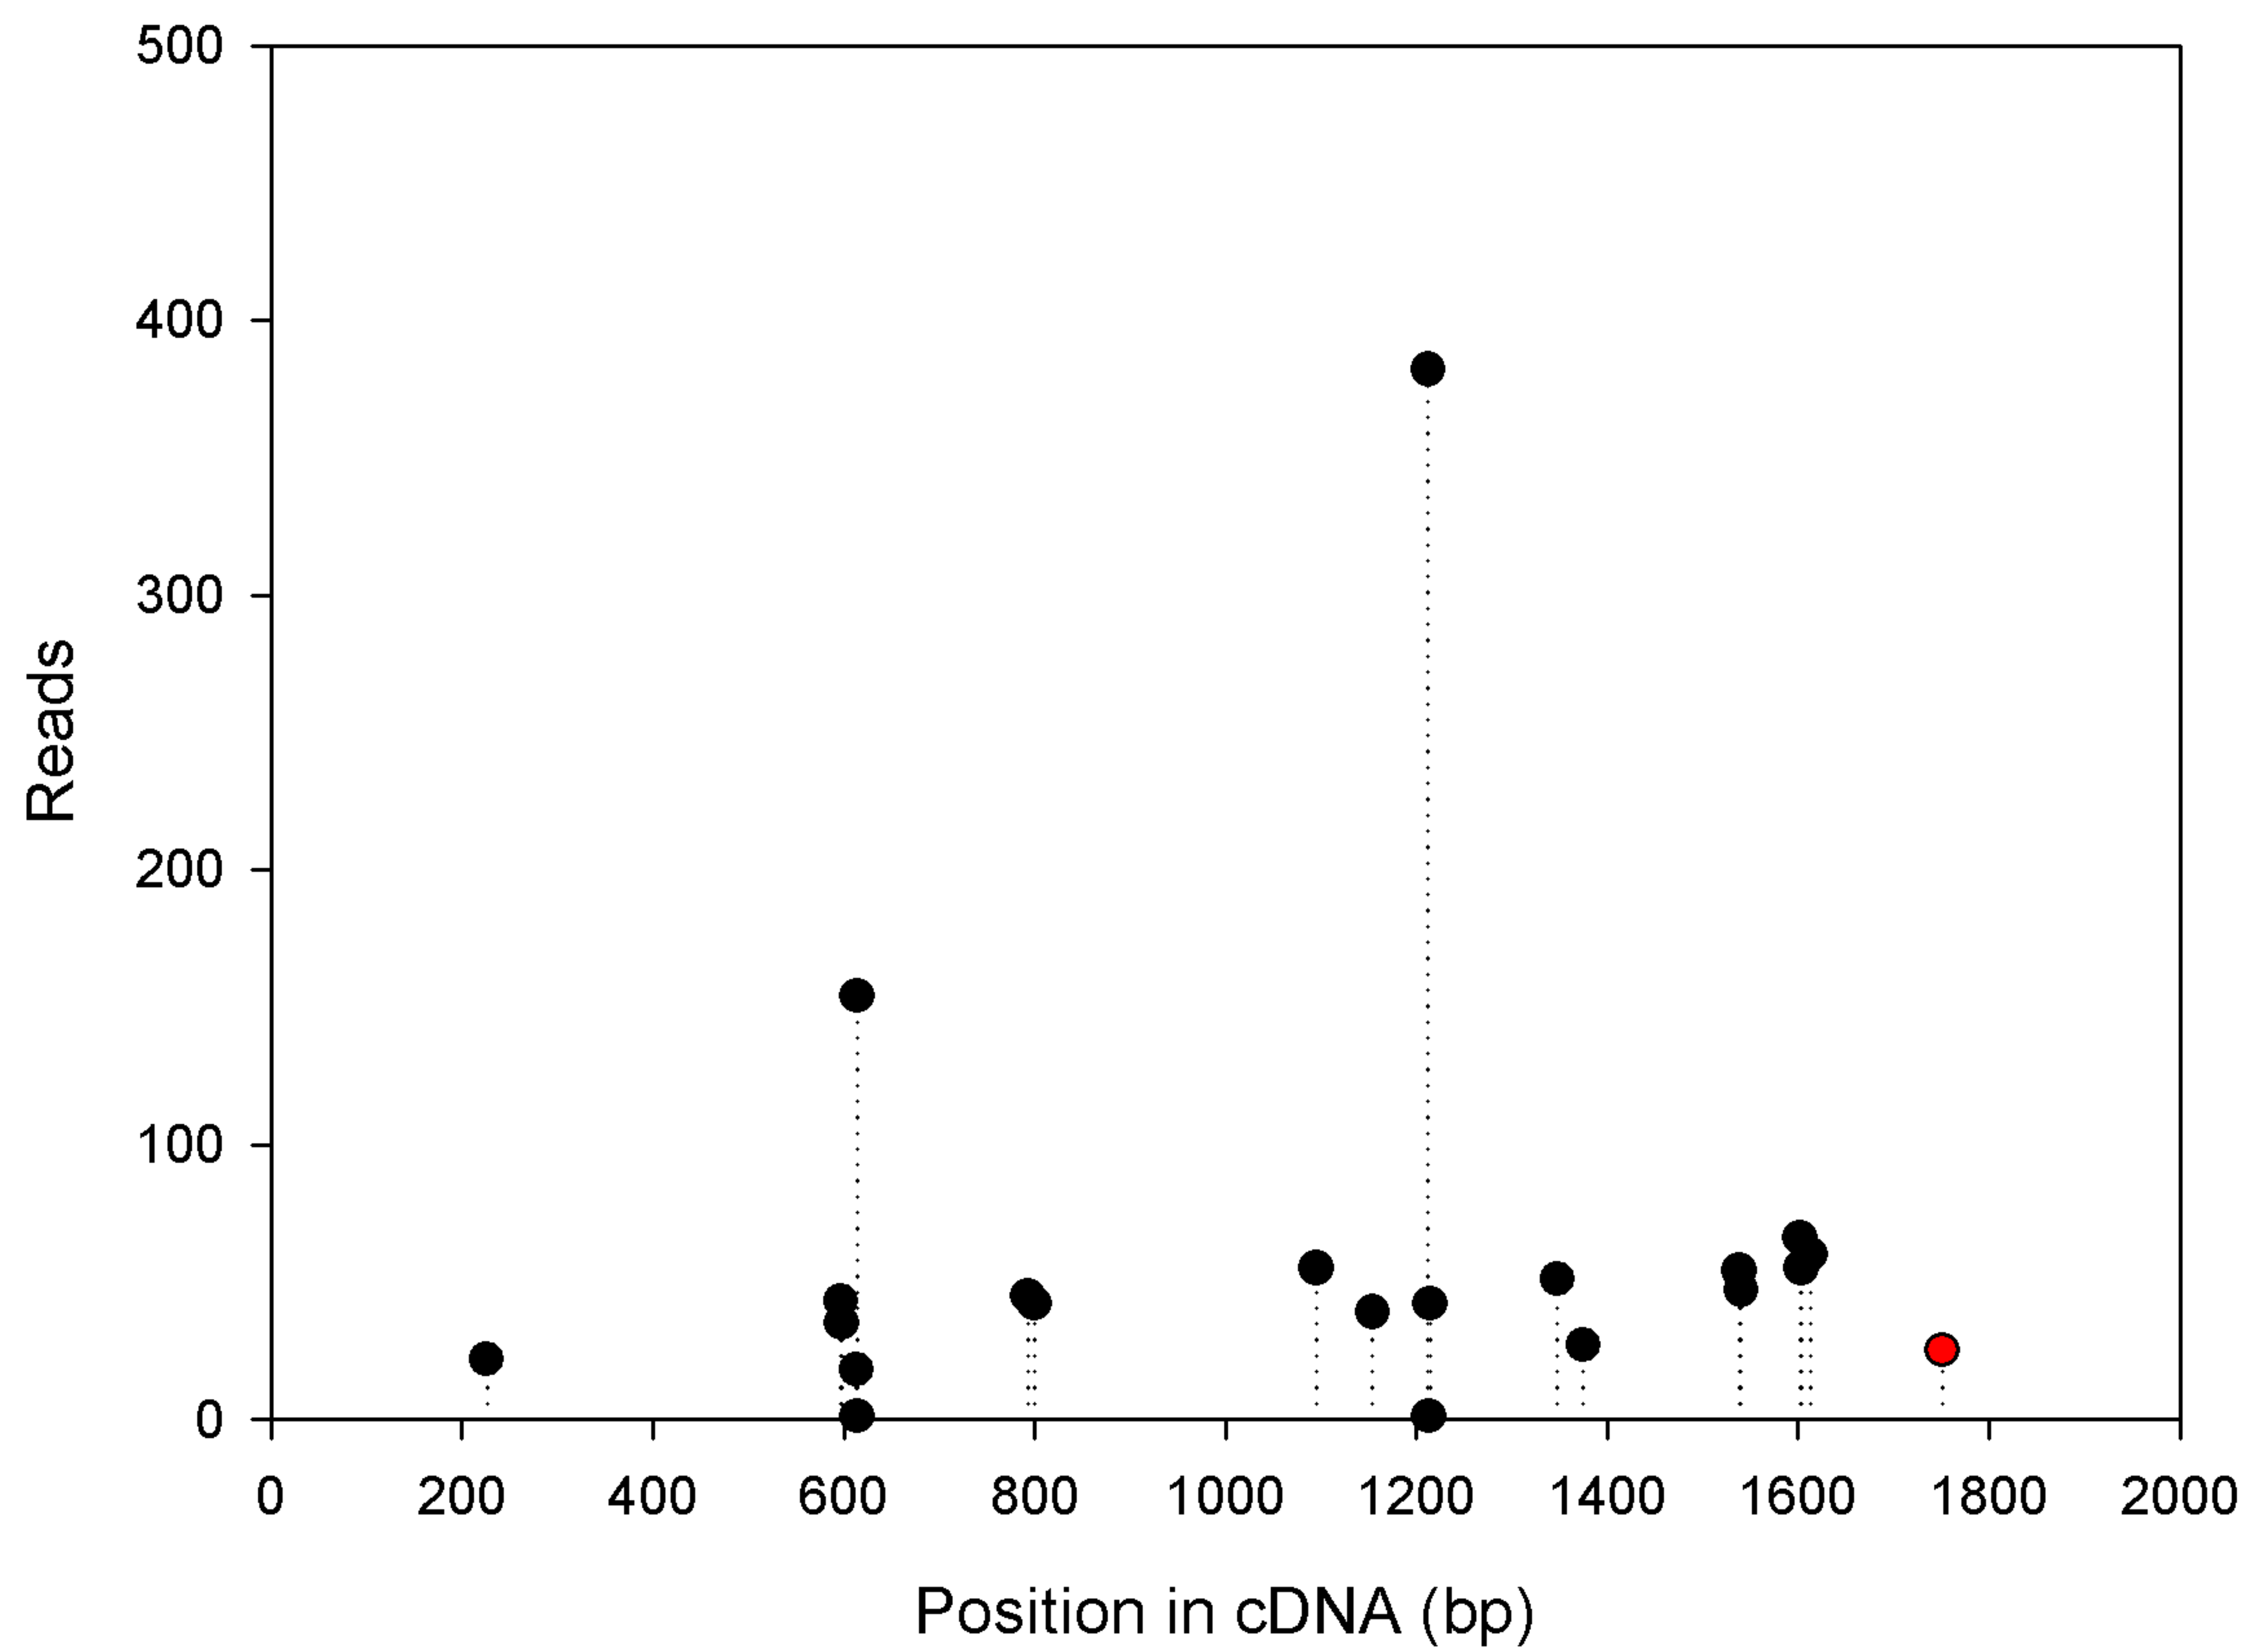

5' GUAAAAAUGCCAAUGGUUCAACUU 3'  
 :::::::::::::::::::::  
 3' ----UUUUACGGUUGCCGAGUUUGU- 5'

Cs2g11470.1

Csi-miR482a-3p-Cs3g13340.1-20

Csi-miR482a-3p-Cs3g13340.1-35, target=Orange1.1t02629.1 gene=Orange1.1t02629  
 Category:3  
 Score:5  
 Cleavage site:1195

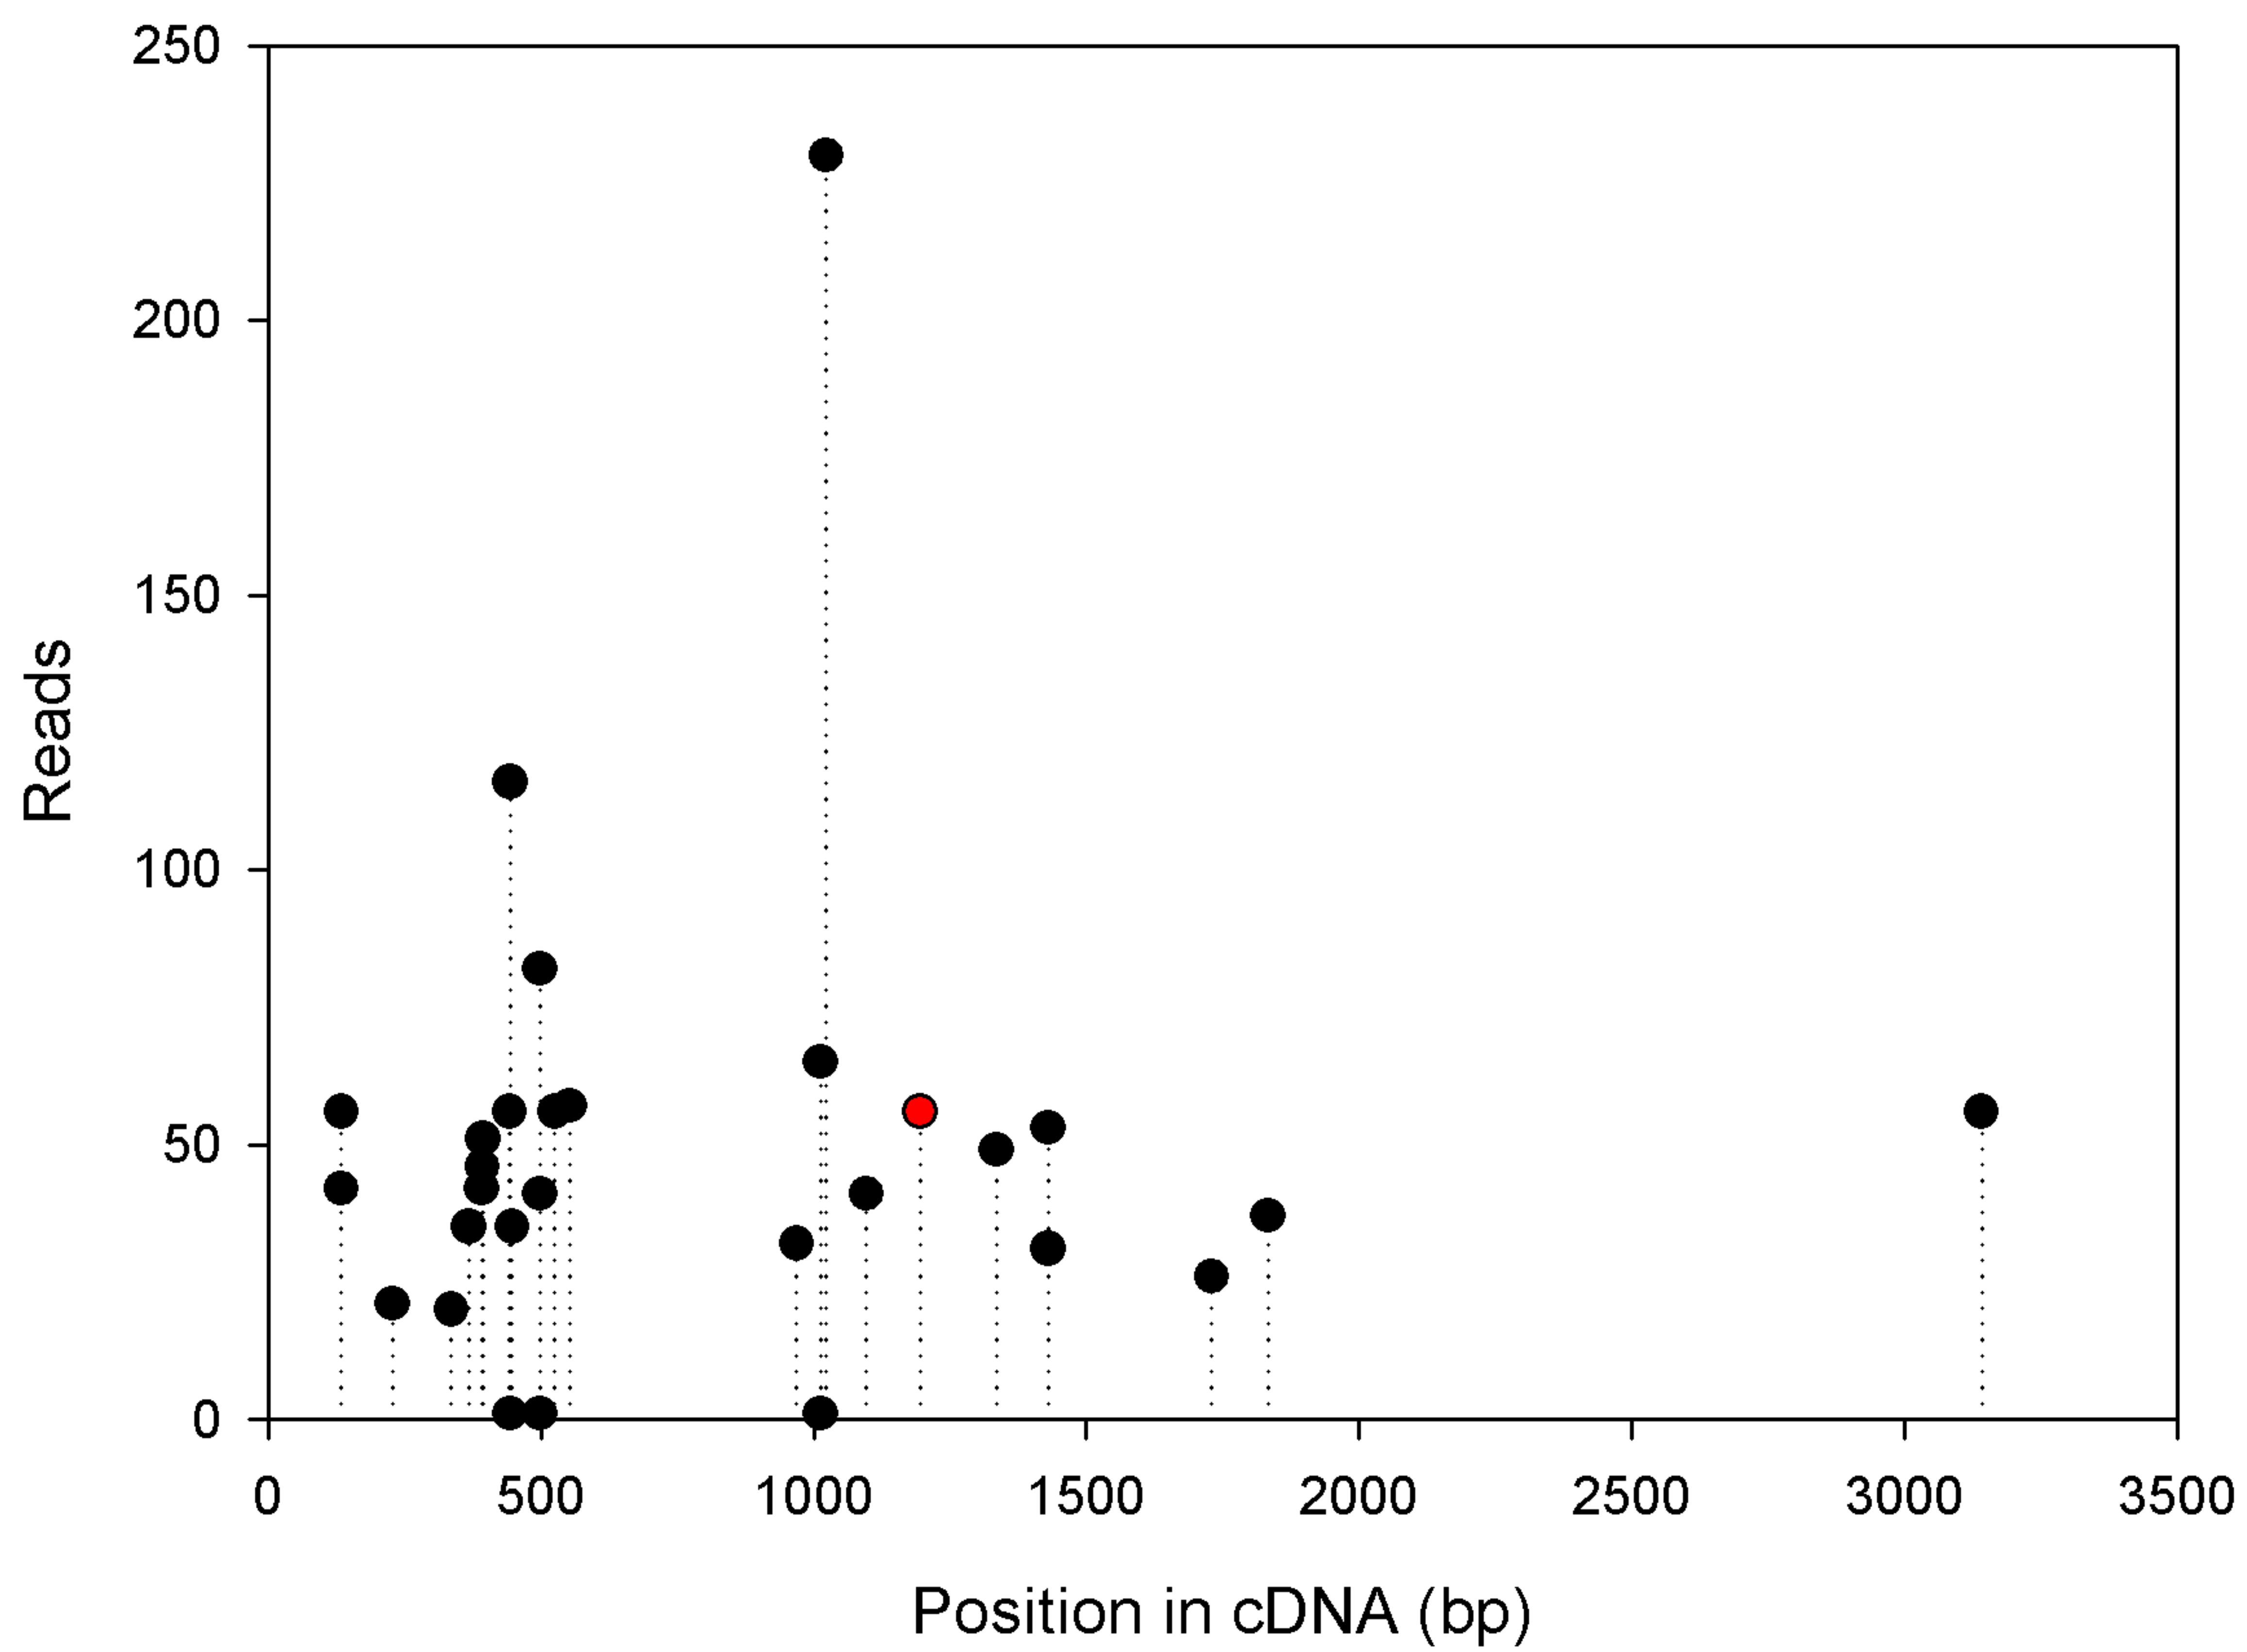

5' AGUAUUUUACAUAAGUUCAGUUAACUG 3'  
 :: .. : :::::::::::::::  
 3' -CACGGUAGGUAUCAAGUUAU---- 5'

Orange1.1t02629.1

Csi-miR482a-3p-Cs3g13340.1-35

Csi-miR482a-3p-Orange1.1t01918.1-29, target=Cs2g21880.1 gene=Cs2g21880  
Category:3  
Score:5  
Cleavage site:349

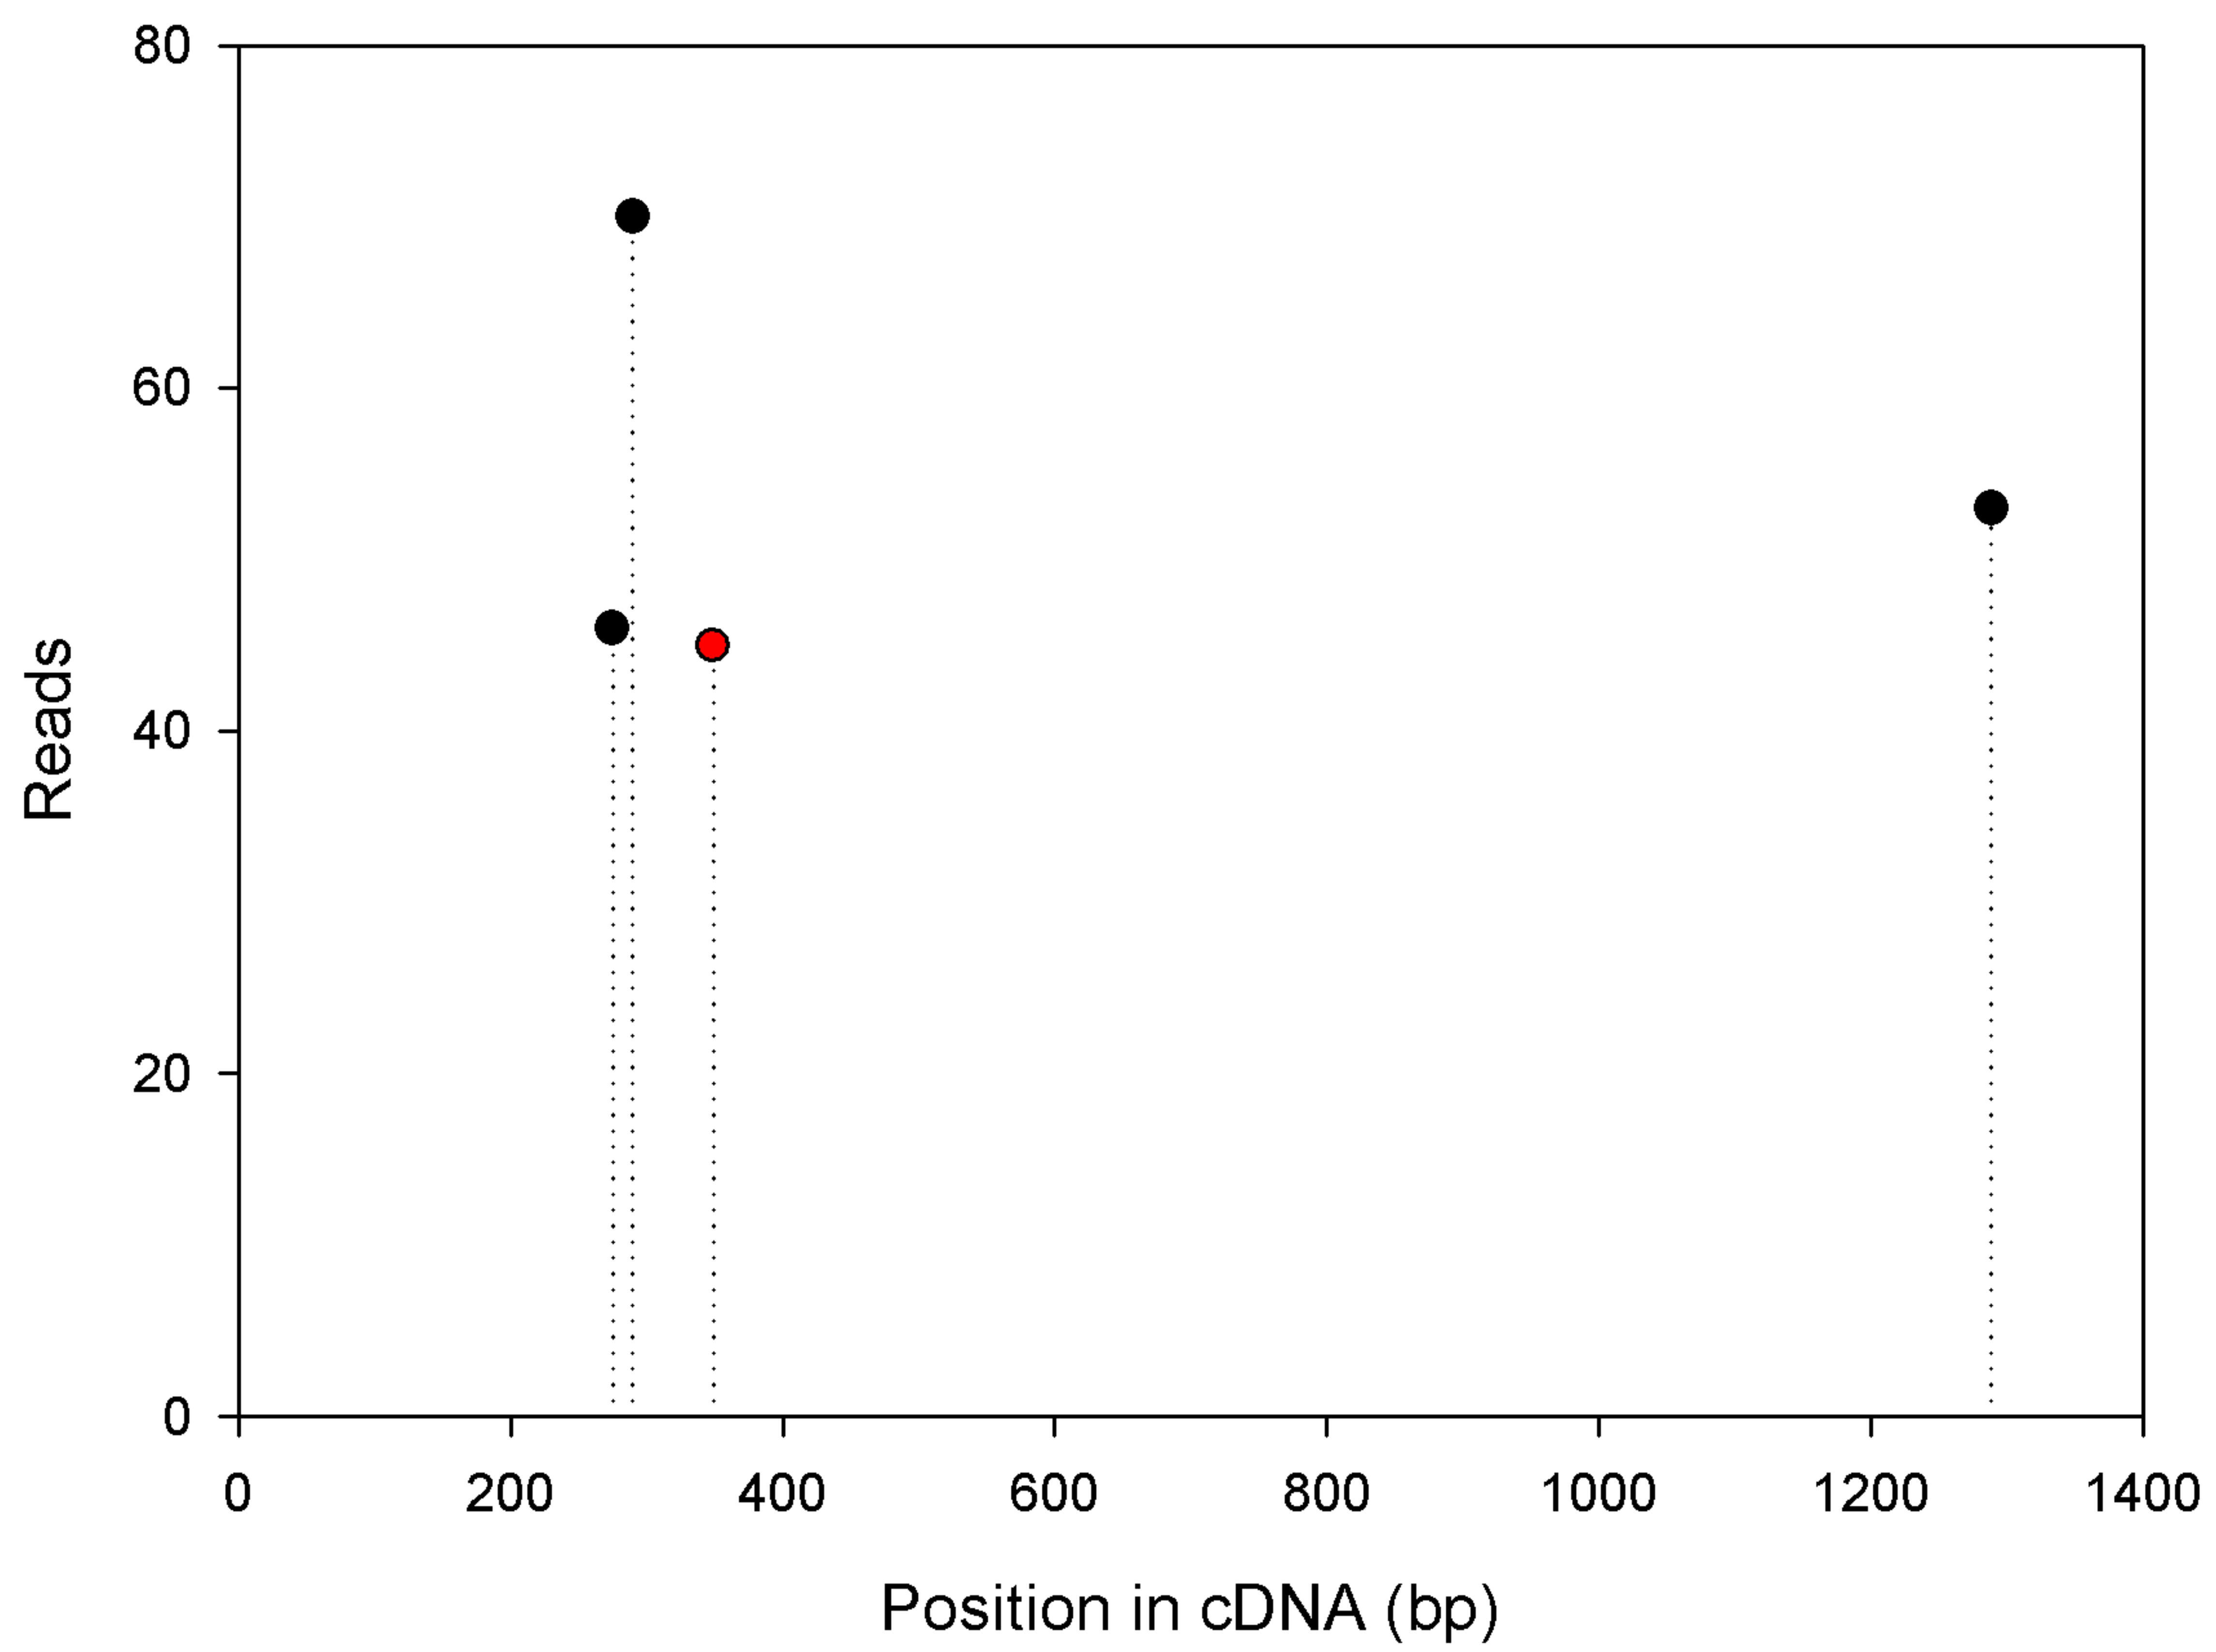

5' GAUGUCCAAU-CUCUUCUCGAUCUCUU 3'  
    :. . . :. . . :. . . :. . . :  
3' -----CUUGUGGAAAGAGUUAGAGAA 5'

Cs2g21880.1

Csi-miR482a-3p-Orange1.1t01918.1-29

Csi-miR482a-3p-Orange1.1t01918.1-29, target=Cs8g02370.1 gene=Cs8g02370  
 Category:1  
 Score:5  
 Cleavage site:168

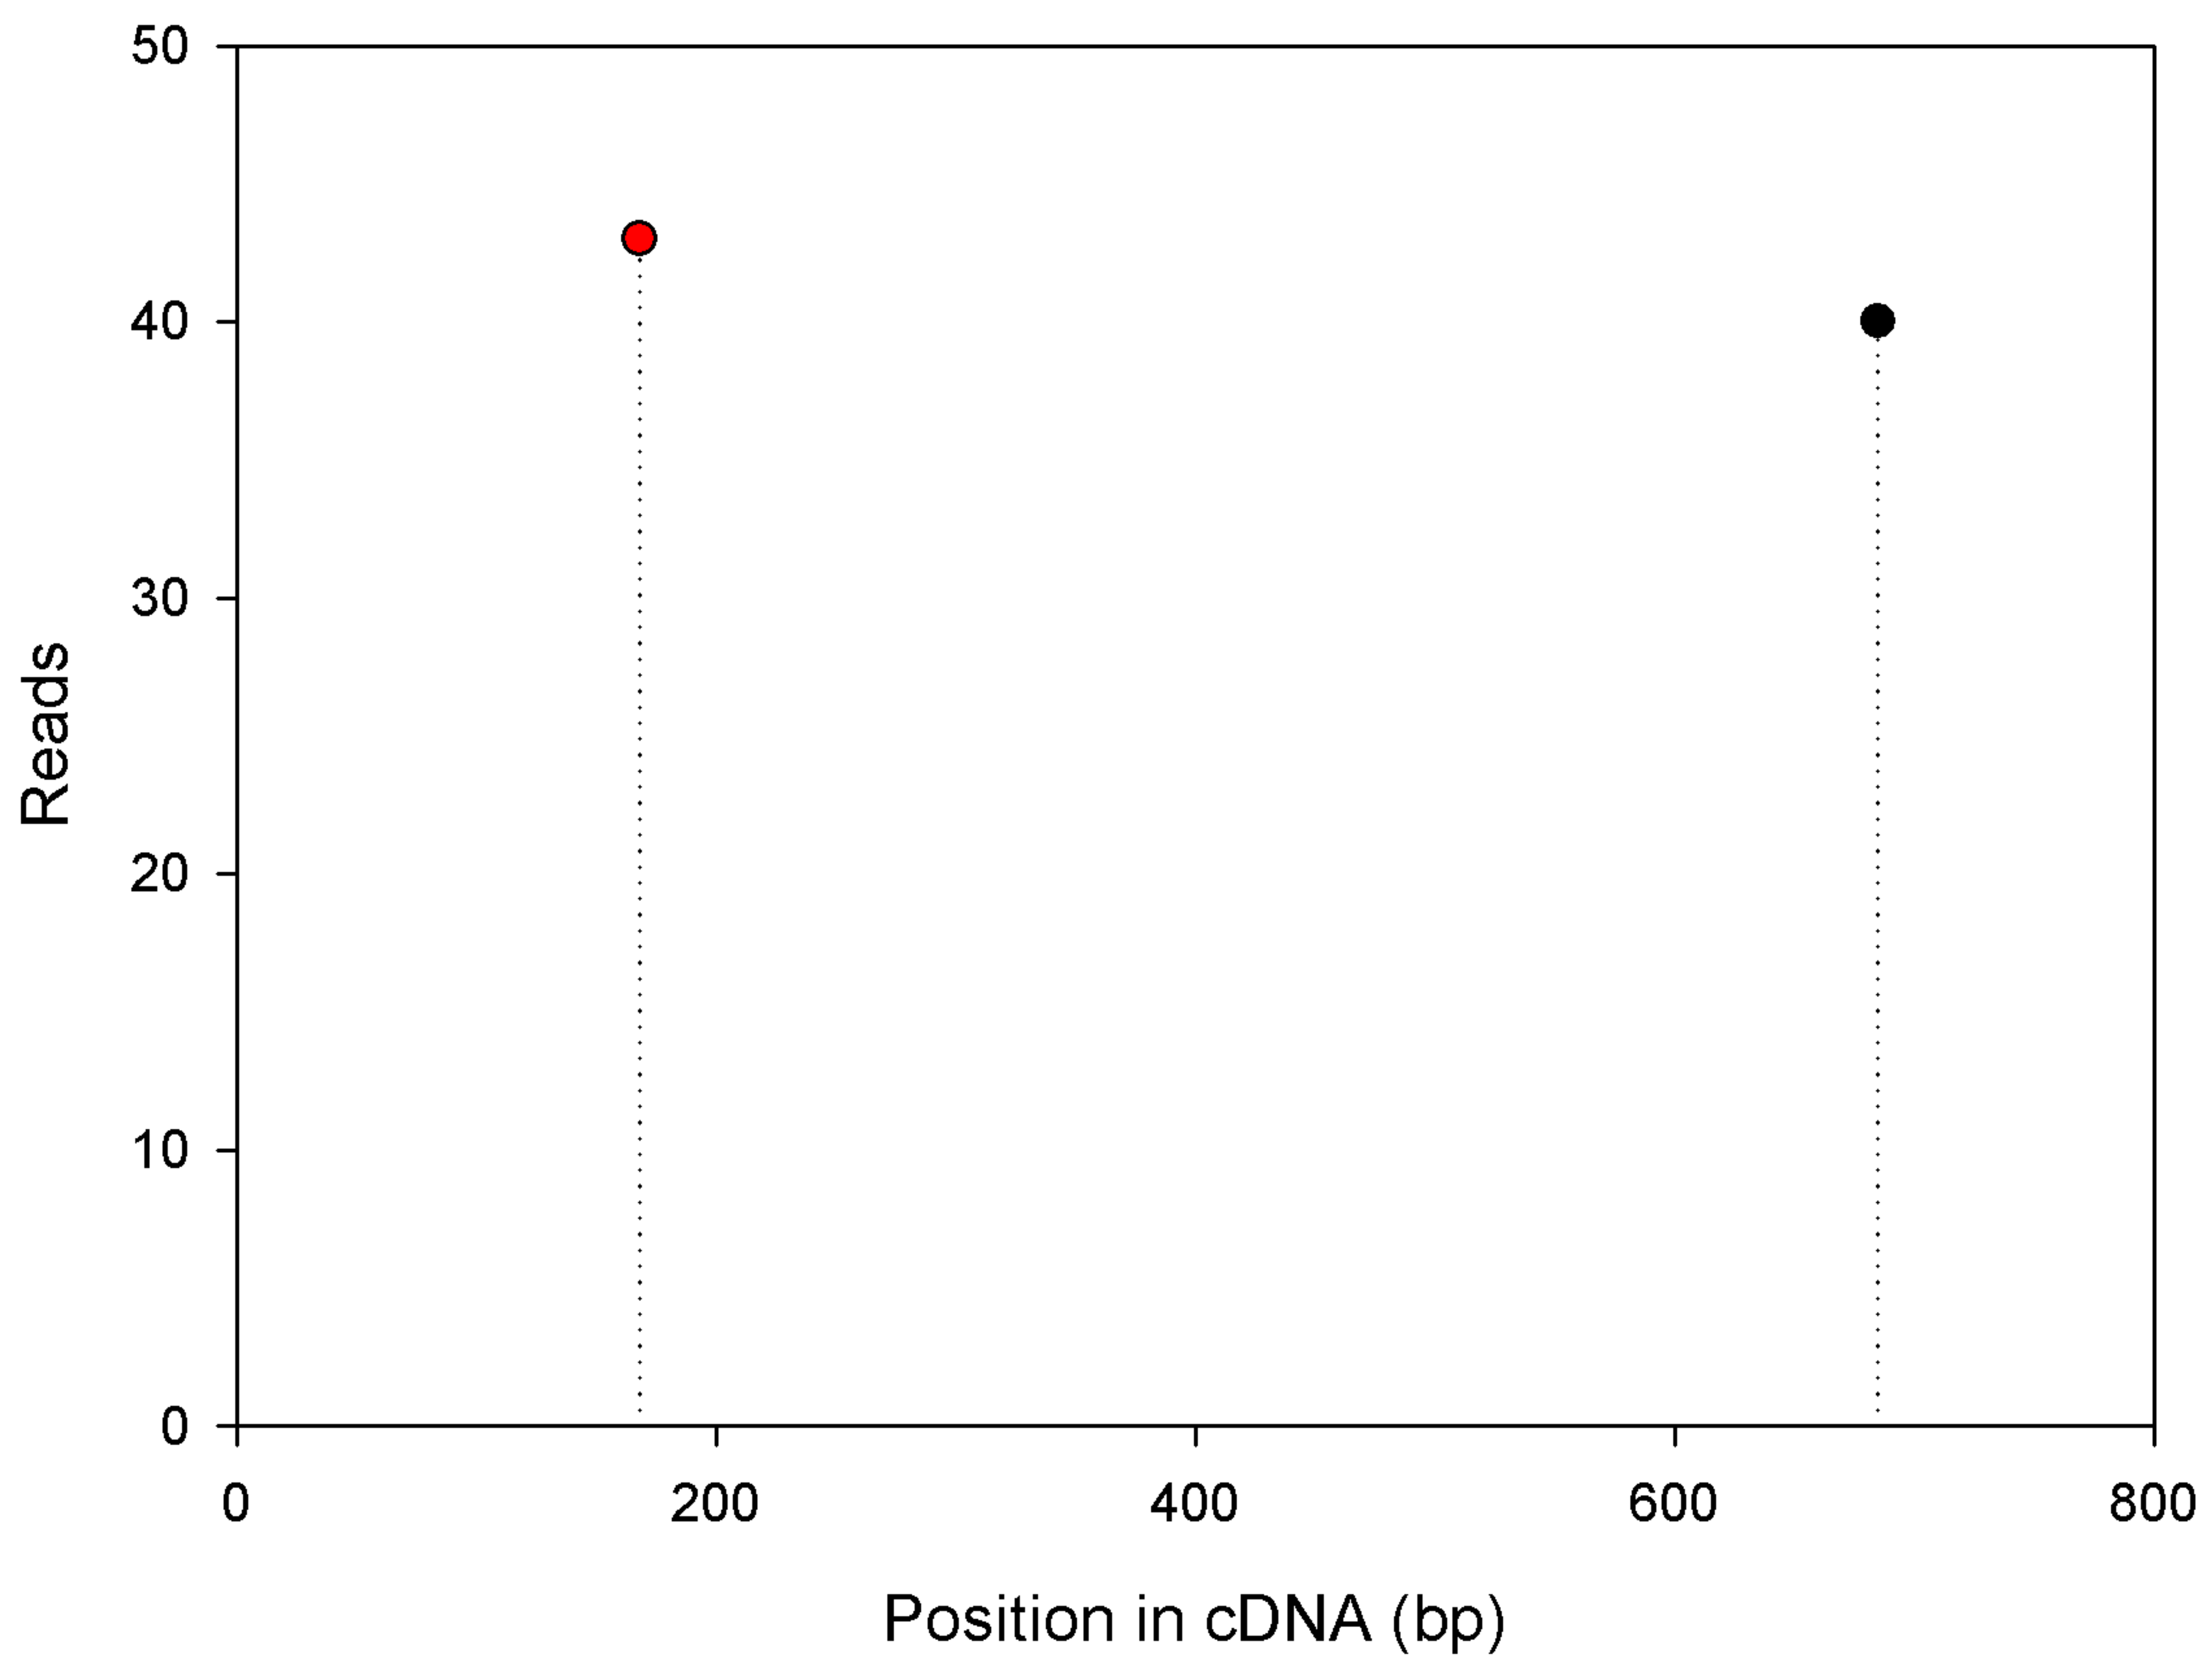

```
5' GGAAUCCUUCUGCAAUCUCUAUCU 3'
   :::  :::::  :::::
3' -CUUGUGGAAAGA-GUUAGAGAA--- 5'
```

Cs8g02370.1

Csi-miR482a-3p-Orange1.1t01918.1-29

Csi-miR482a-3p-Orange1.1t01918.1-29, target=Orange1.1t03281.1 gene=Orange1.1t03281

Category:2

Score:5

Cleavage site:45

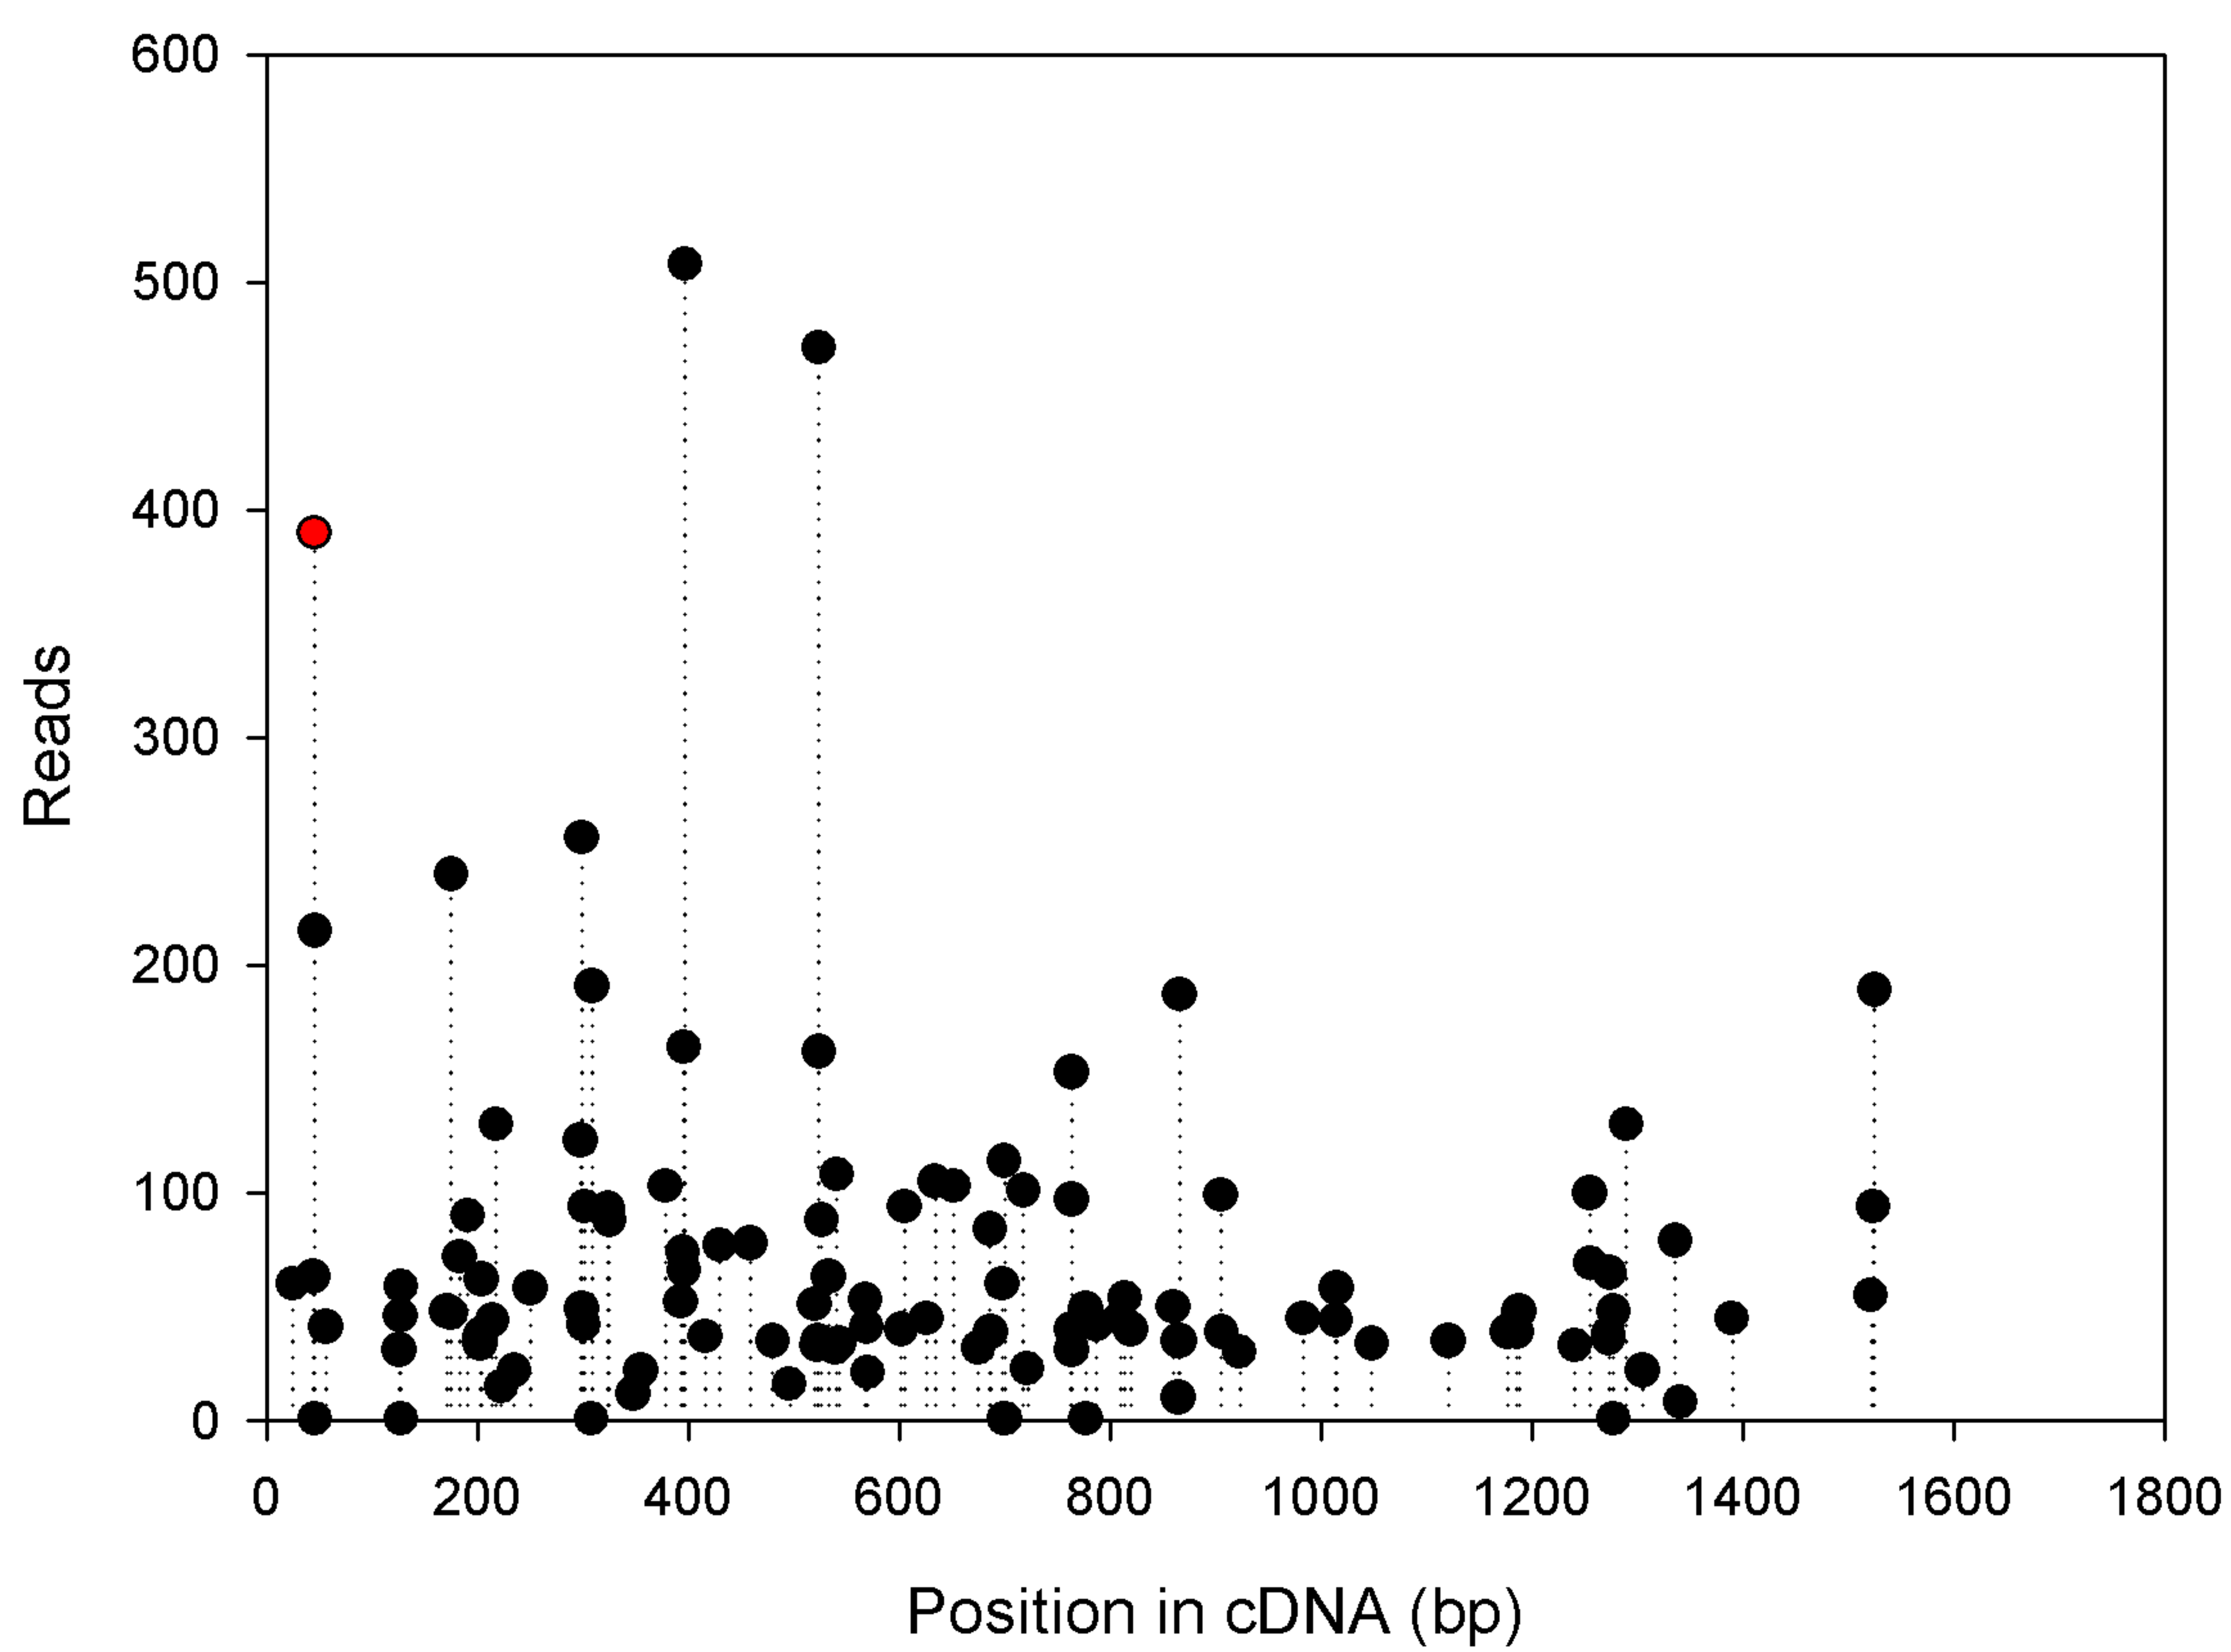

5' UAACCAAAC-CCUUUCUGAUUUCUC 3'

Orange1.1t03281.1

::: ::::::::::::::::::::

3' -----CUUGUGGAAAGAGUUAGAGAA 5'

Csi-miR482a-3p-Orange1.1t01918.1-29

Csi-miR482a-3p-Orange1.1t01918.1-6, target=Cs6g02560.1 gene=Cs6g02560  
 Category:3  
 Score:4  
 Cleavage site:768

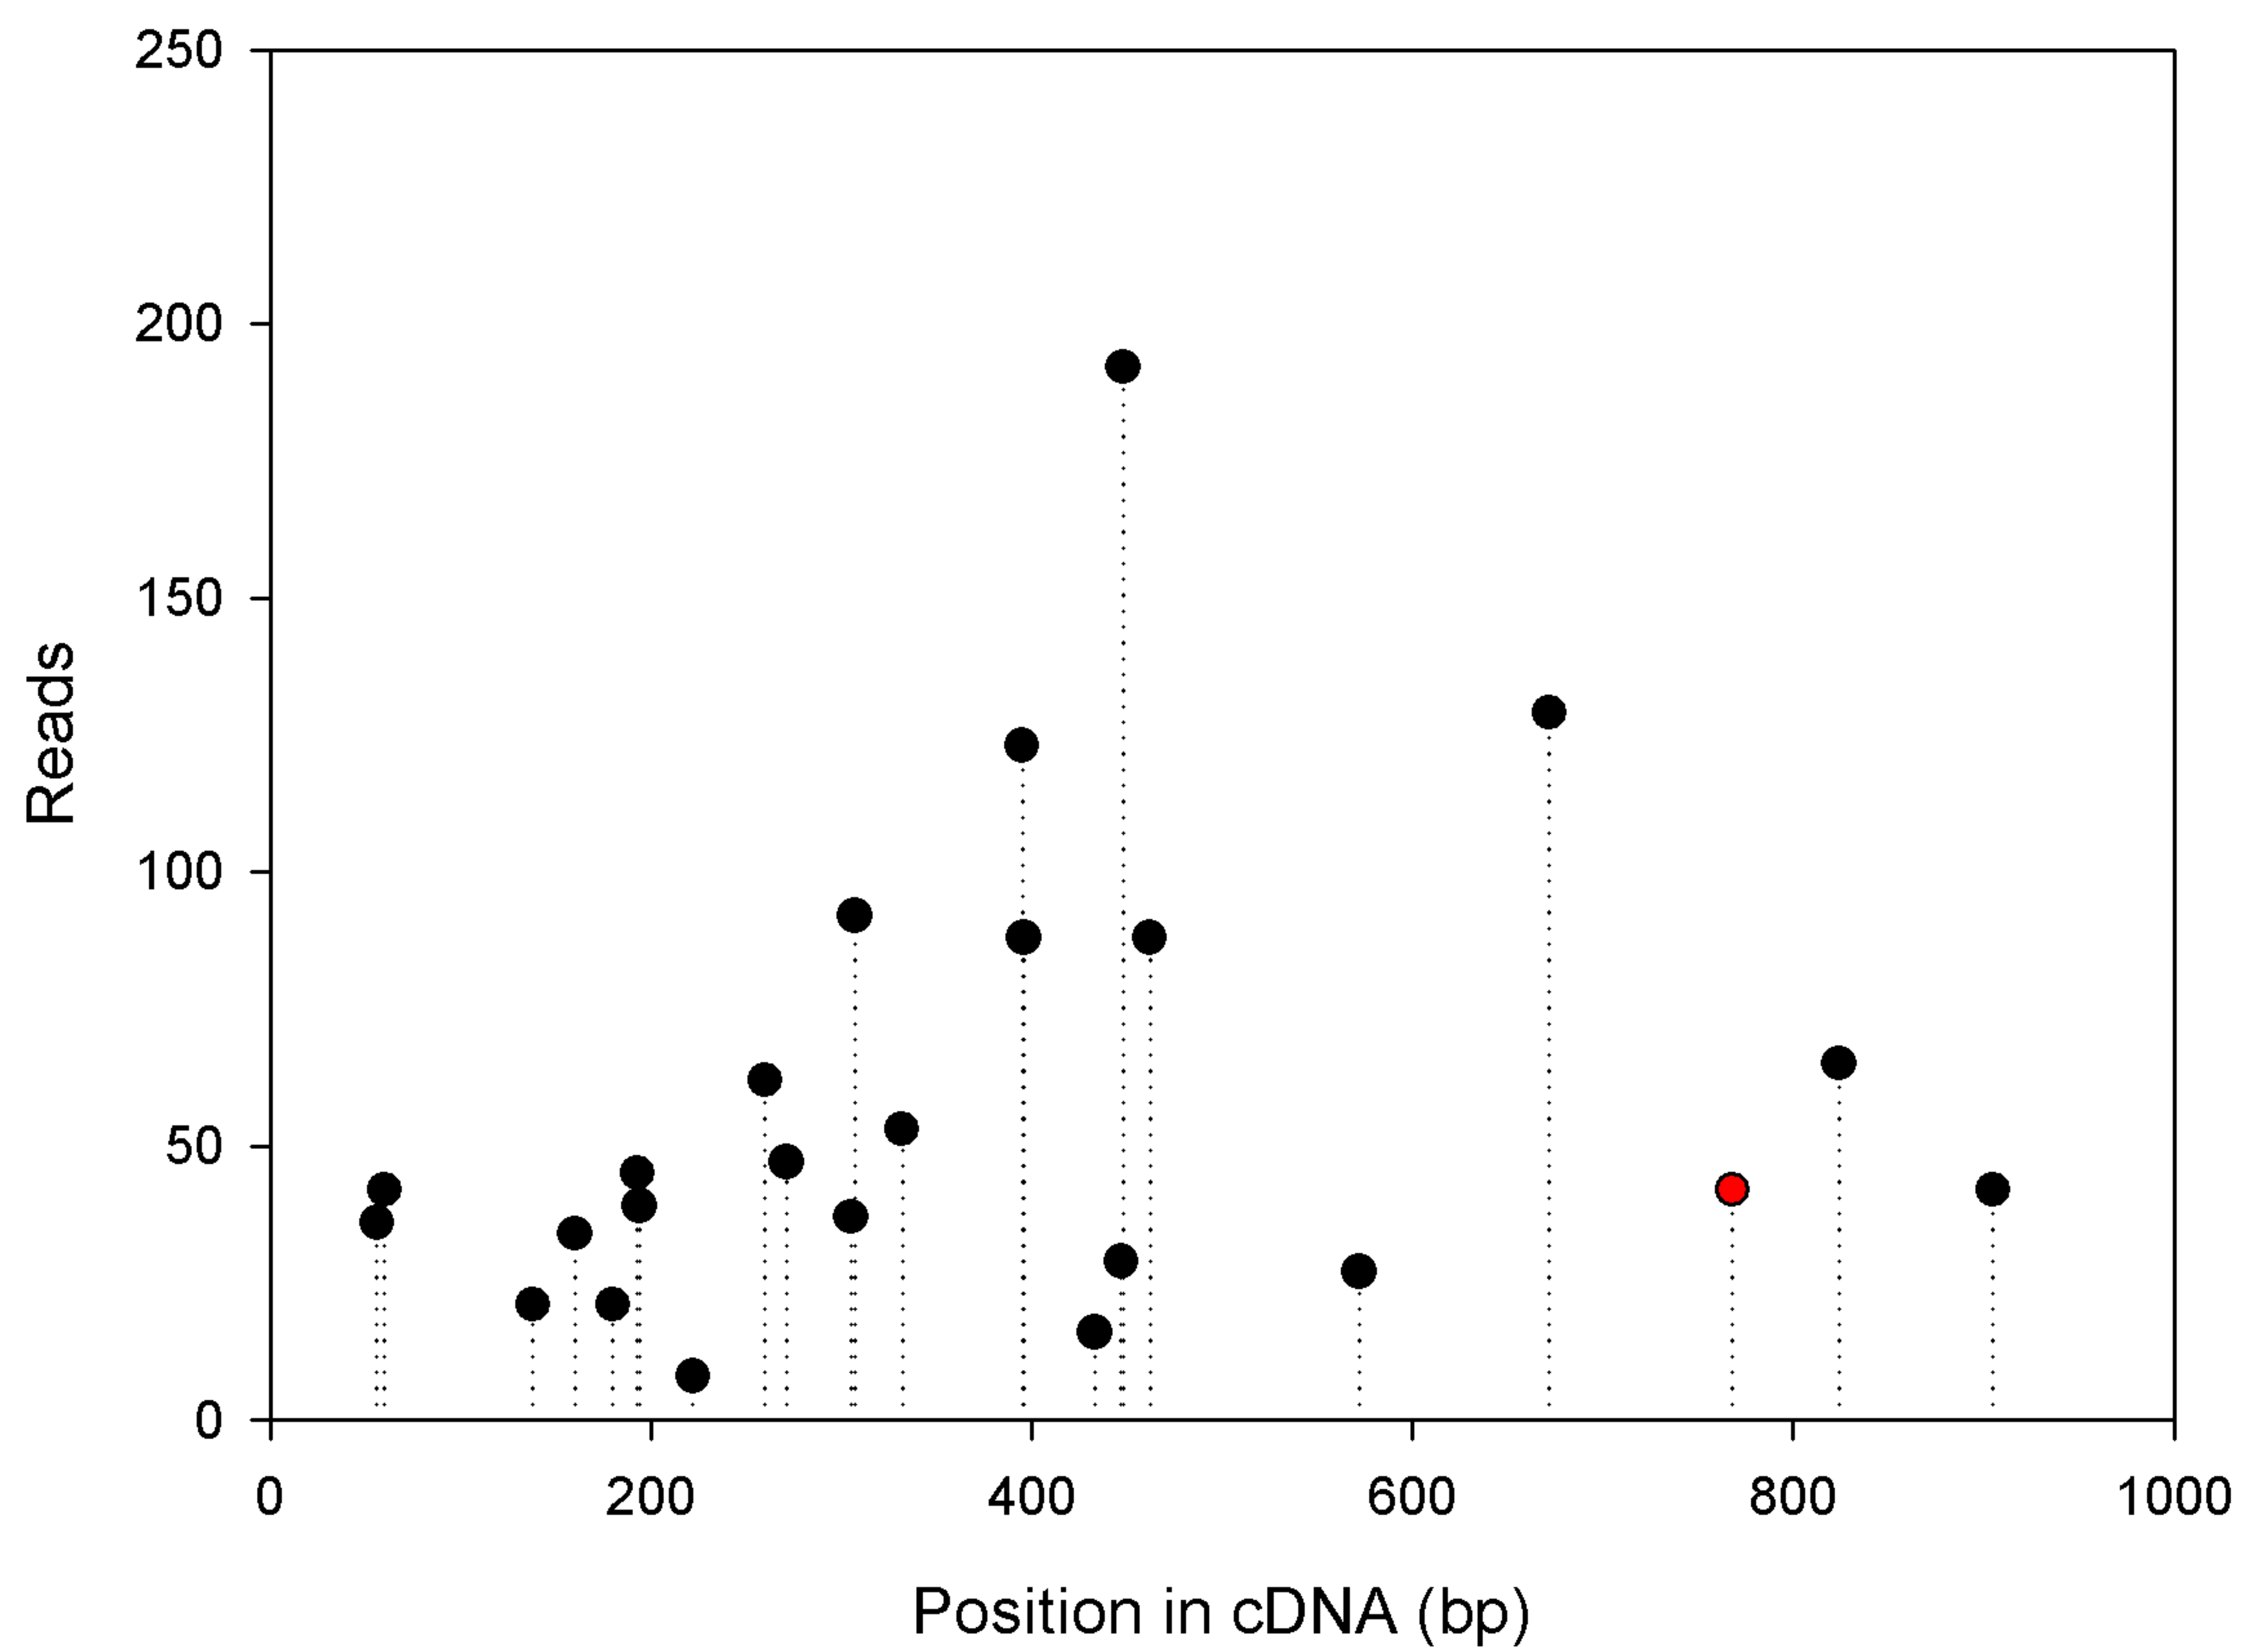

5' CCACAAUUGC UUUGGCAACACACAAA 3'  
 : : : : : : : : : : : : : : : : : :  
 3' GCUGGUAACGAAACCGUUGGG----- 5'

Cs6g02560.1

Csi-miR482a-3p-Orange1.1t01918.1-6

Csi-miR827.2-Cs5g10180.1-14, target=Cs7g18380.1 gene=Cs7g18380  
 Category:3  
 Score:4.5  
 Cleavage site:894

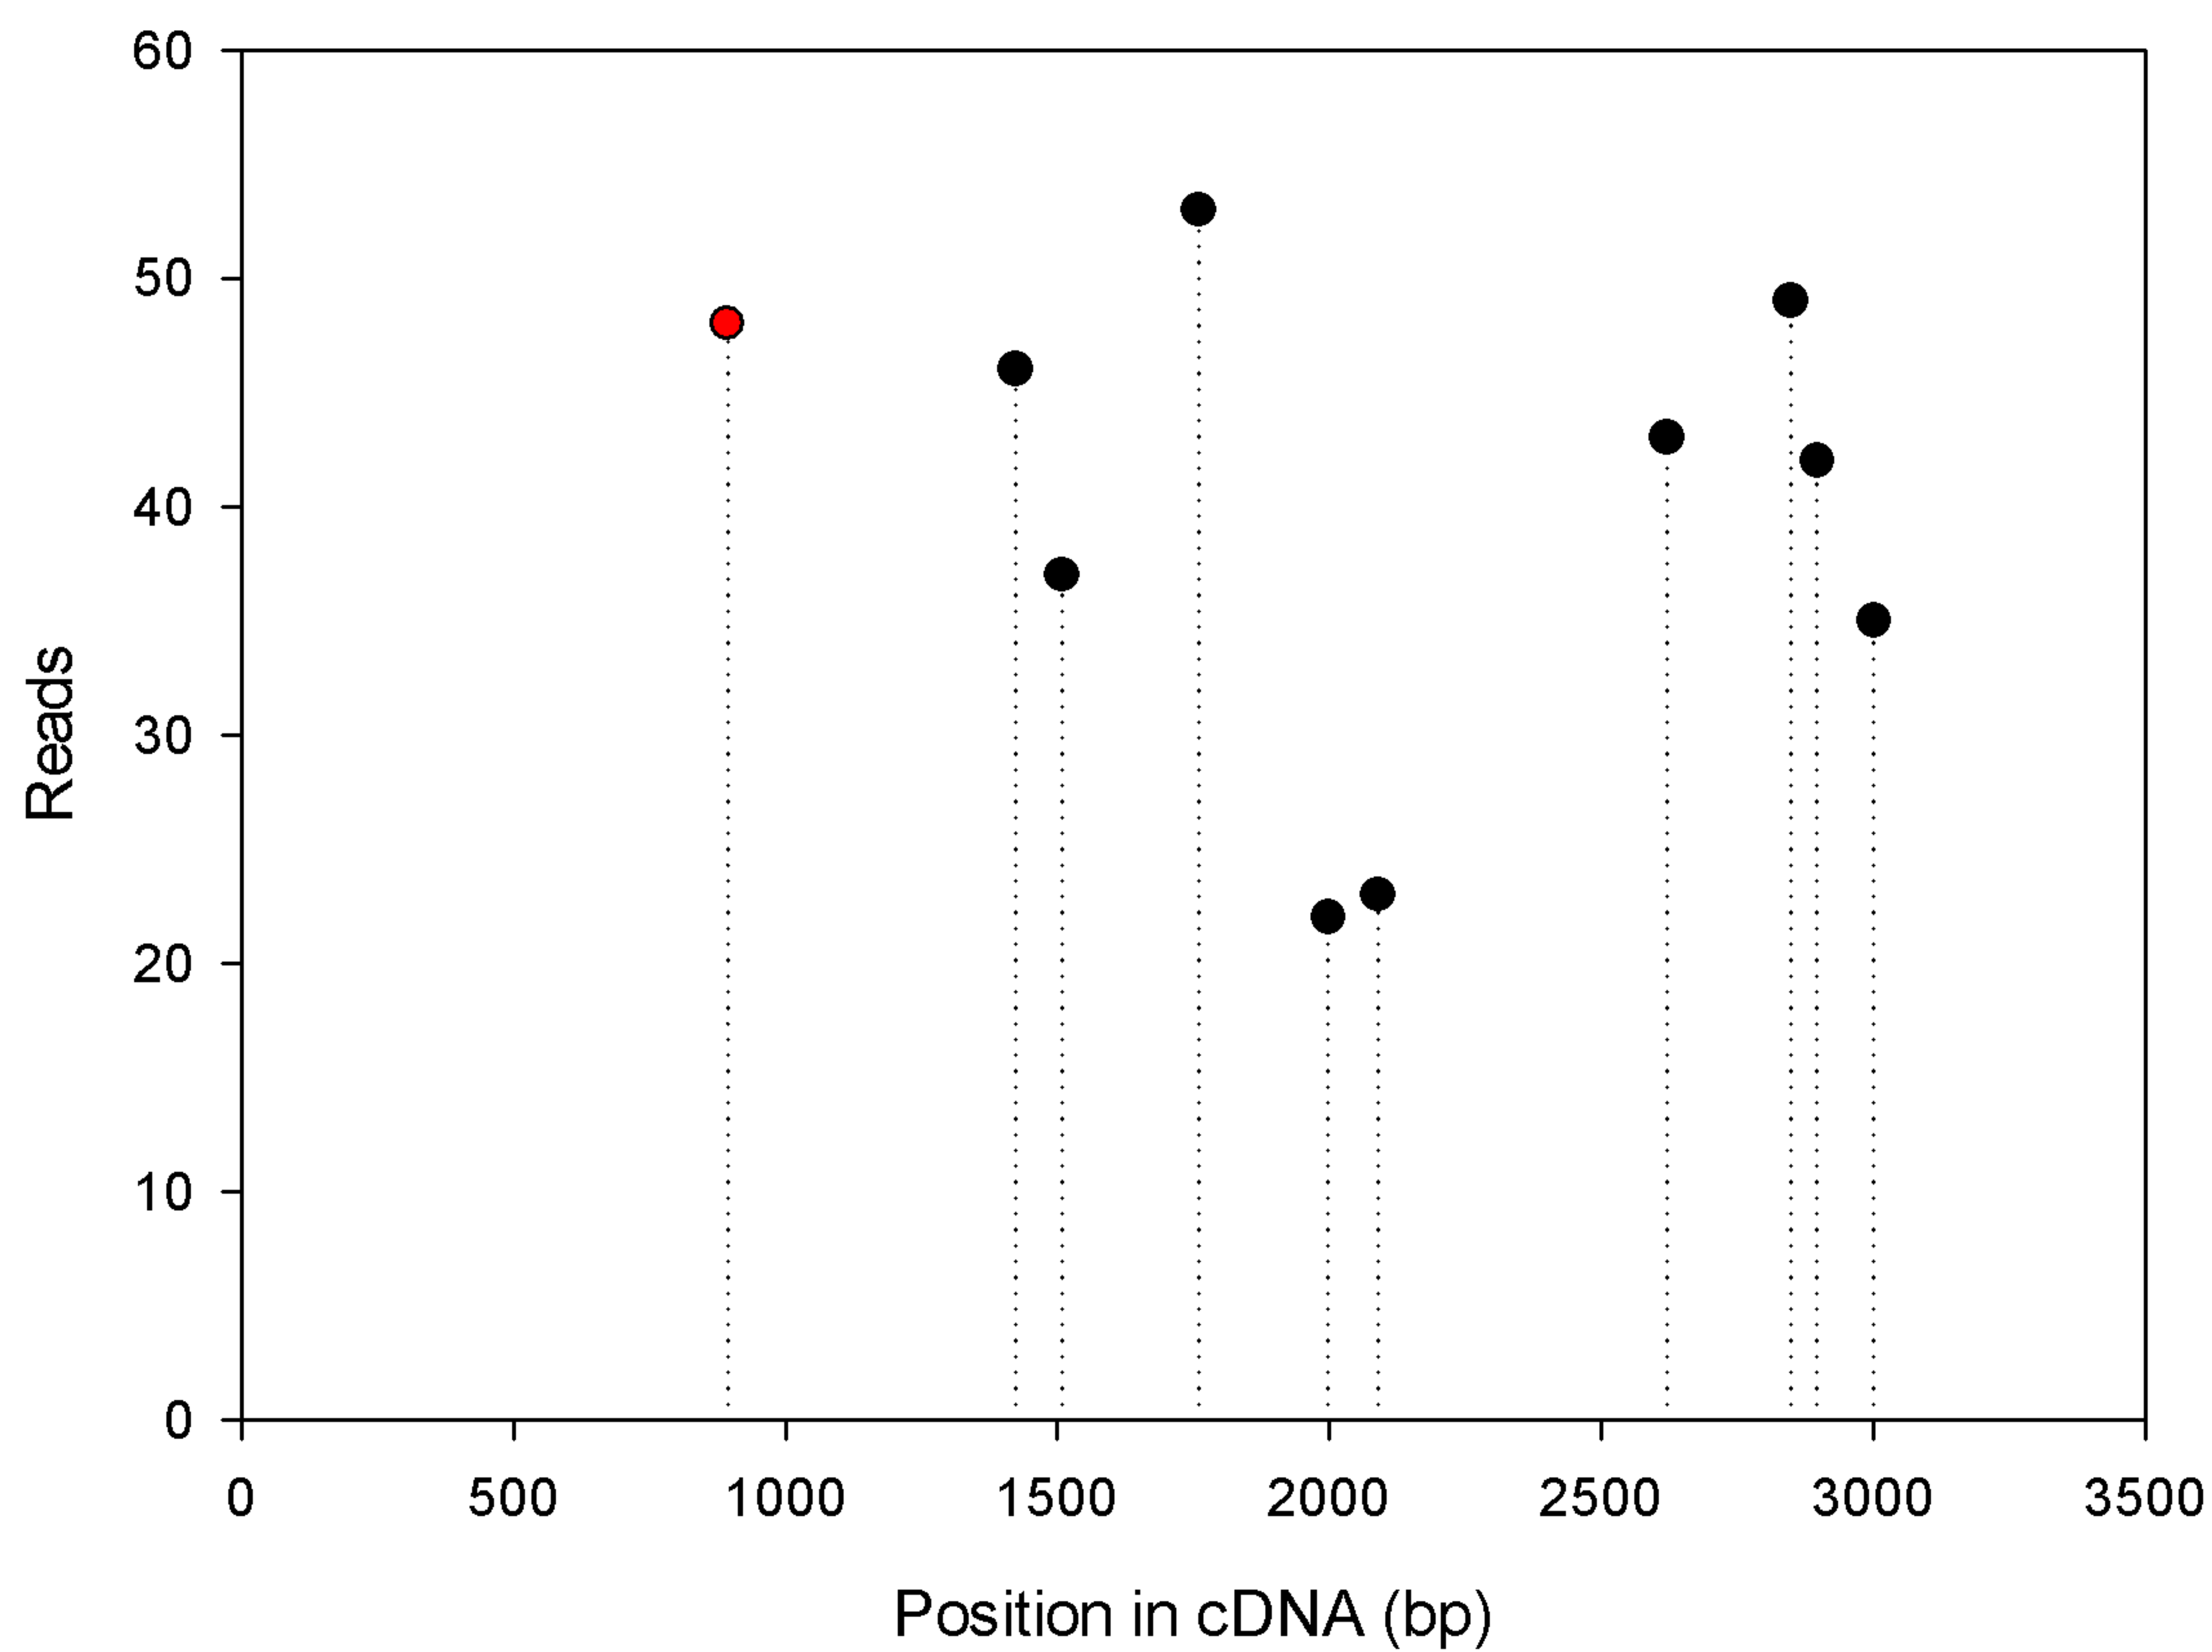

```
5' GAACAAUGCGUCUCAUGCUGUUCUCU 3'
   : : . . : : : : : : : : : : :
3' ----UUCUCGUAGUACGACAAGGGA 5'
```

Cs7g18380.1

Csi-miR827.2-Cs5g10180.1-14

Csi-miRN20-Cs3g05320.1-12, target=Cs1g17610.1 gene=Cs1g17610  
 Category:3  
 Score:5  
 Cleavage site:655

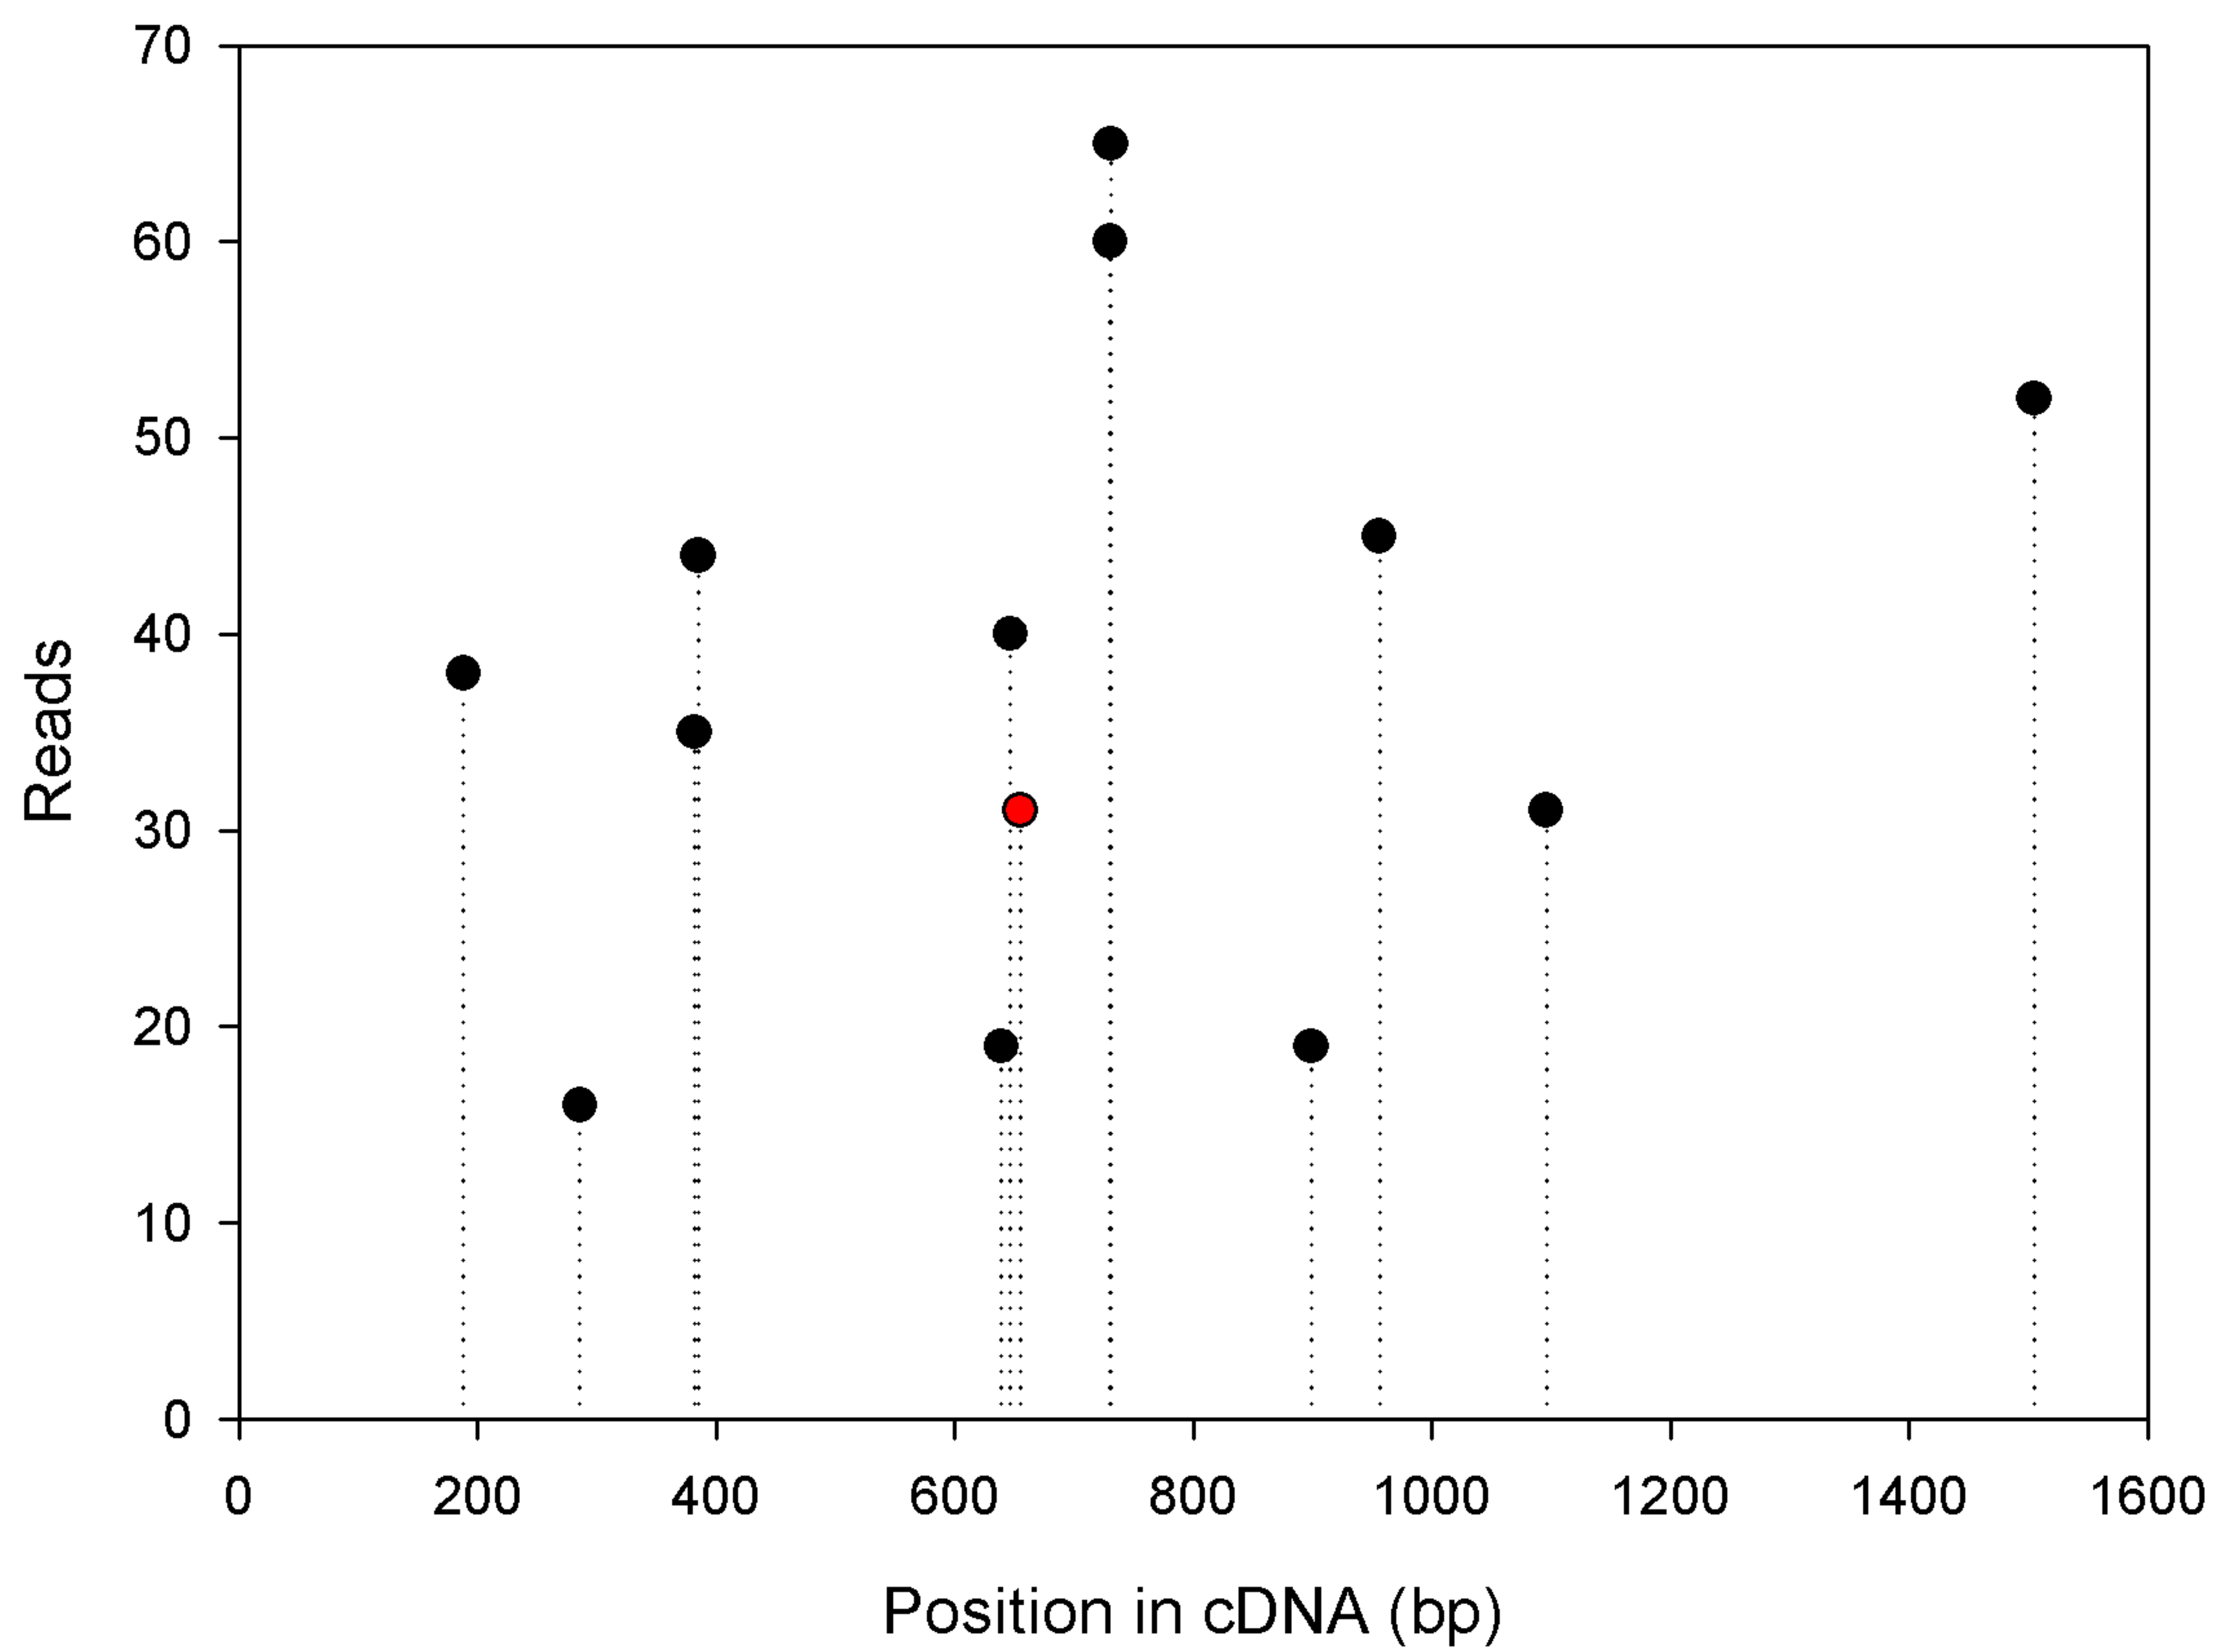

```
5' ACGGCAGAAACCUGGGGUUGUCCAG 3'
   :  :  :  :  :  :  :  :  :  :
3' -GACGACUUUCGACUCCAACAG----- 5'
```

Cs1g17610.1

Csi-miRN20-Cs3g05320.1-12



Csi-miRN20-Cs3g05320.1-12, target=Cs2g28240.1 gene=Cs2g28240

Category:3

Score:5

Cleavage site:168

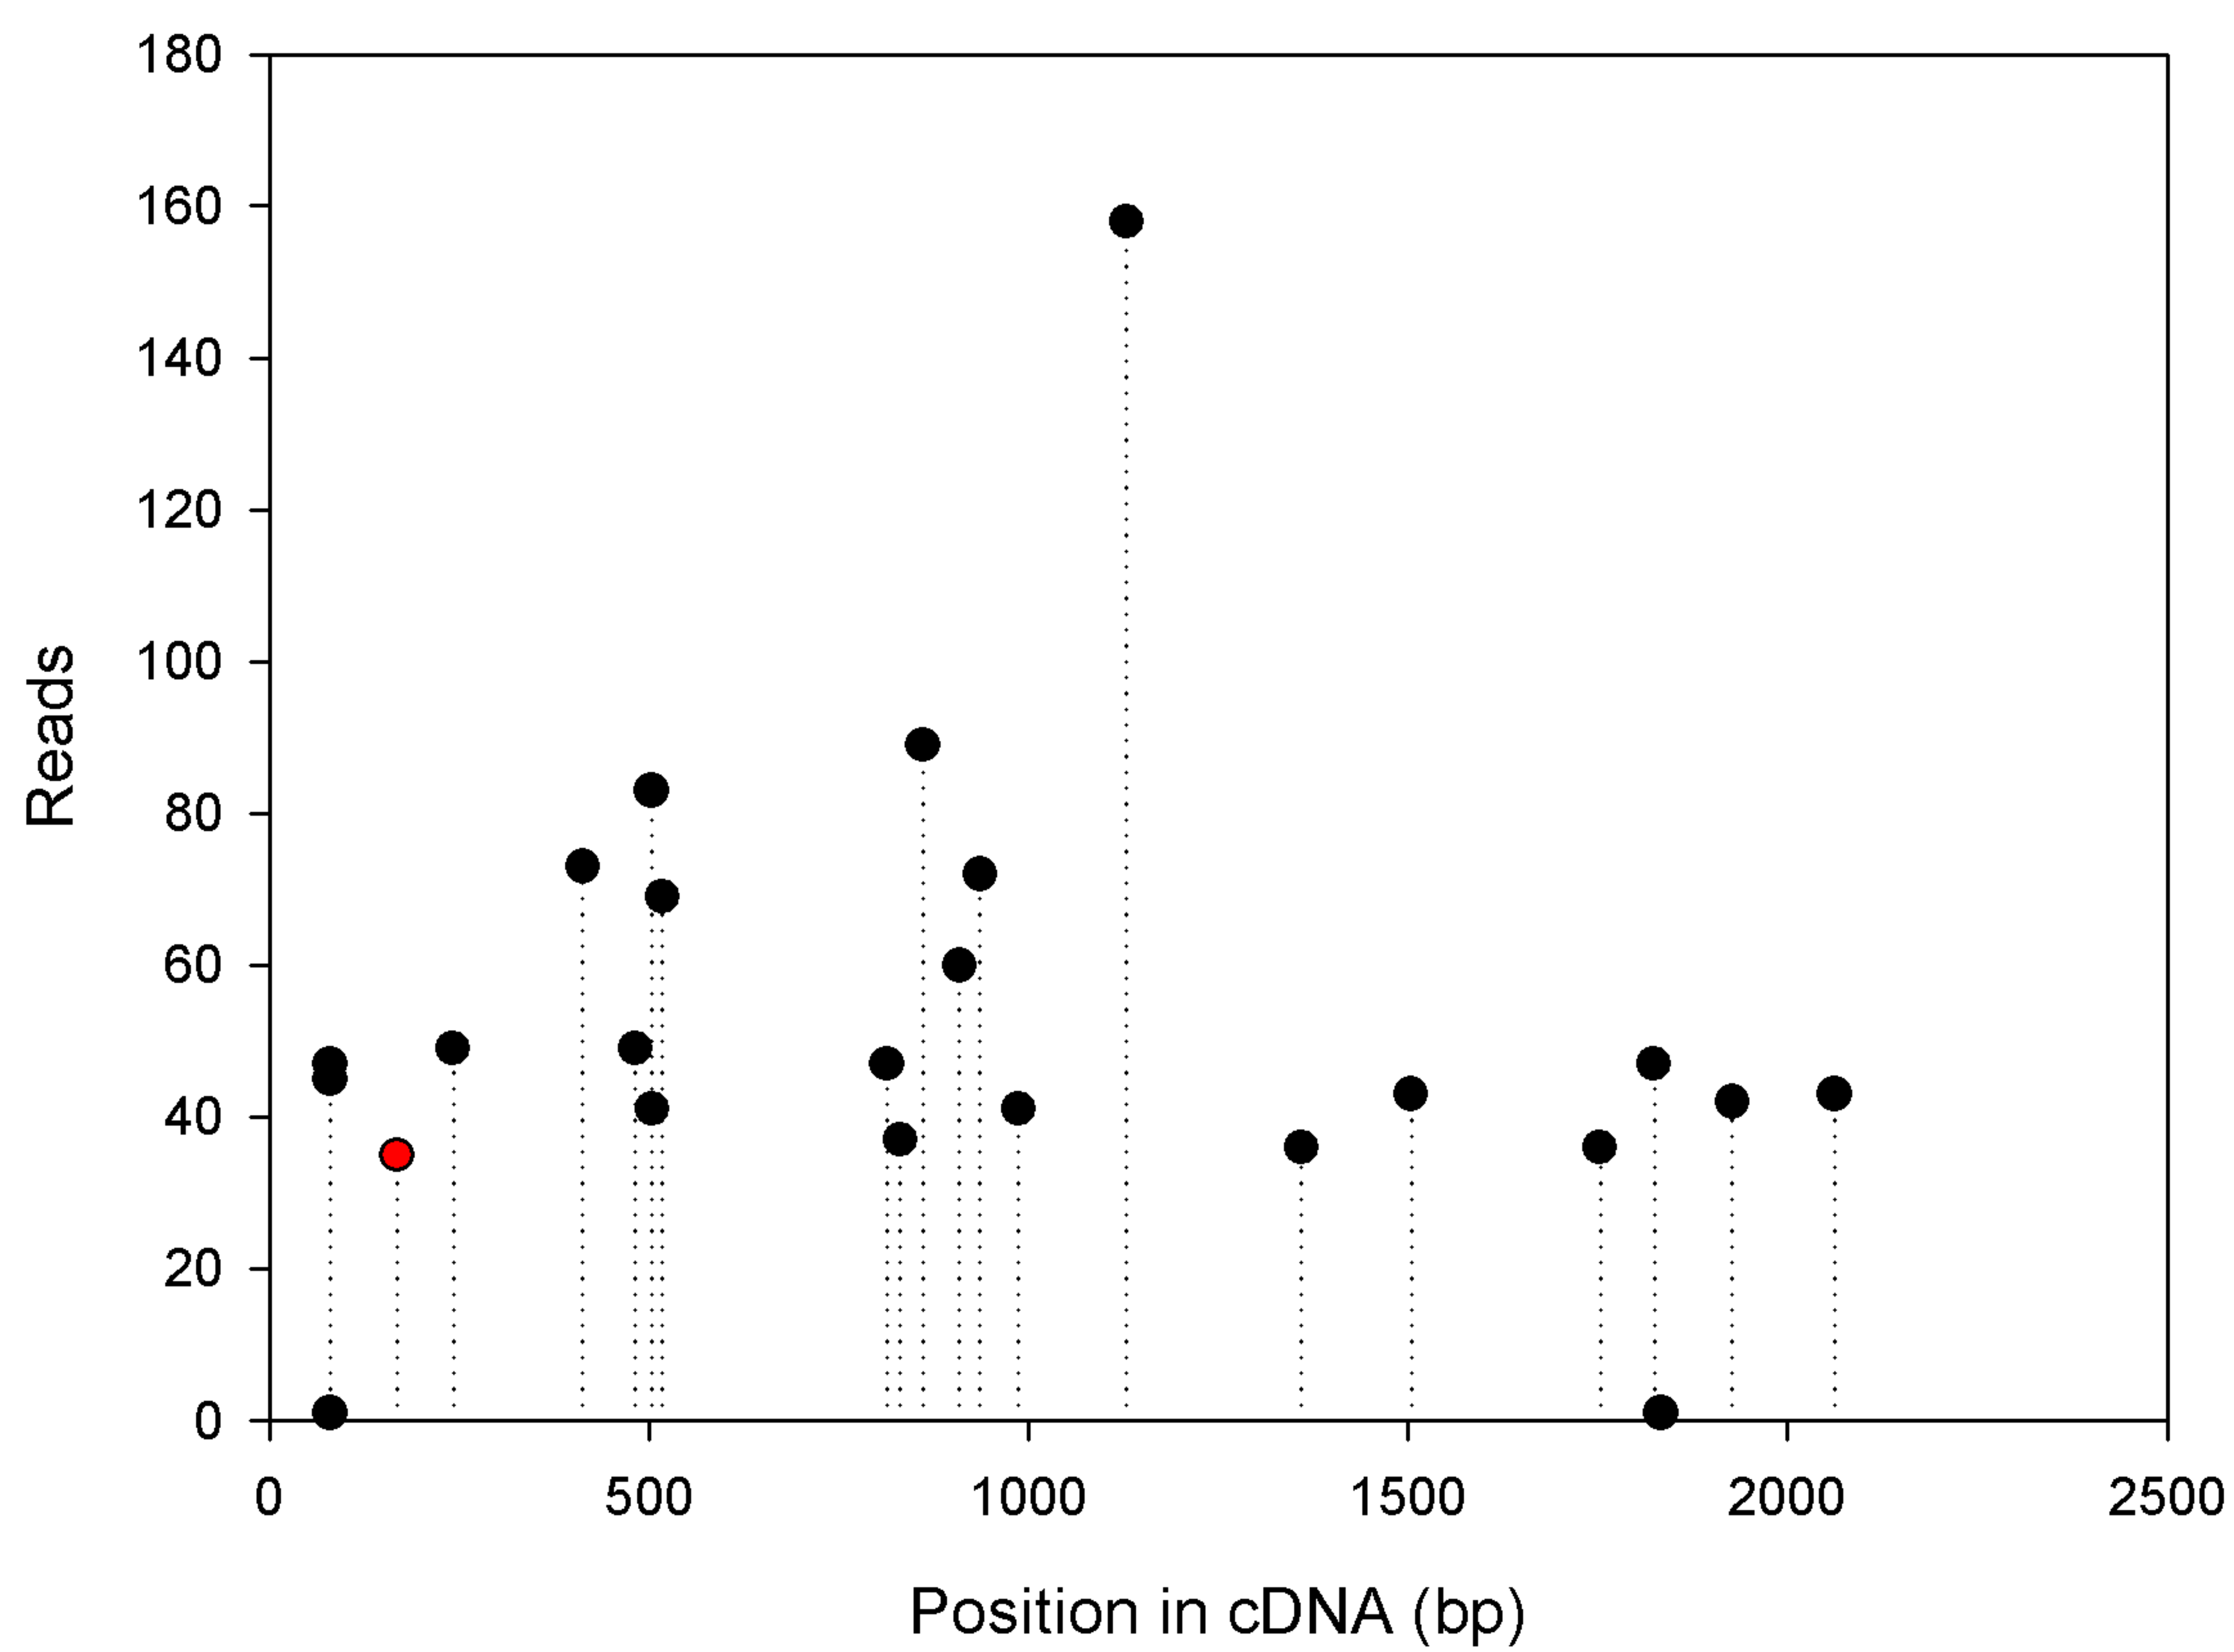

5' UUGGUCUGCUG-AAGCUGACGUUGGCG 3'

Cs2g28240.1

..... : : : :

3' -----GACGACUUUCGACUCCAACAG- 5'

Csi-miRN20-Cs3g05320.1-12

Csi-miRN20-Cs3g05320.1-23, target=Cs7g19680.1 gene=Cs7g19680

Category:3

Score:4.5

Cleavage site:3832

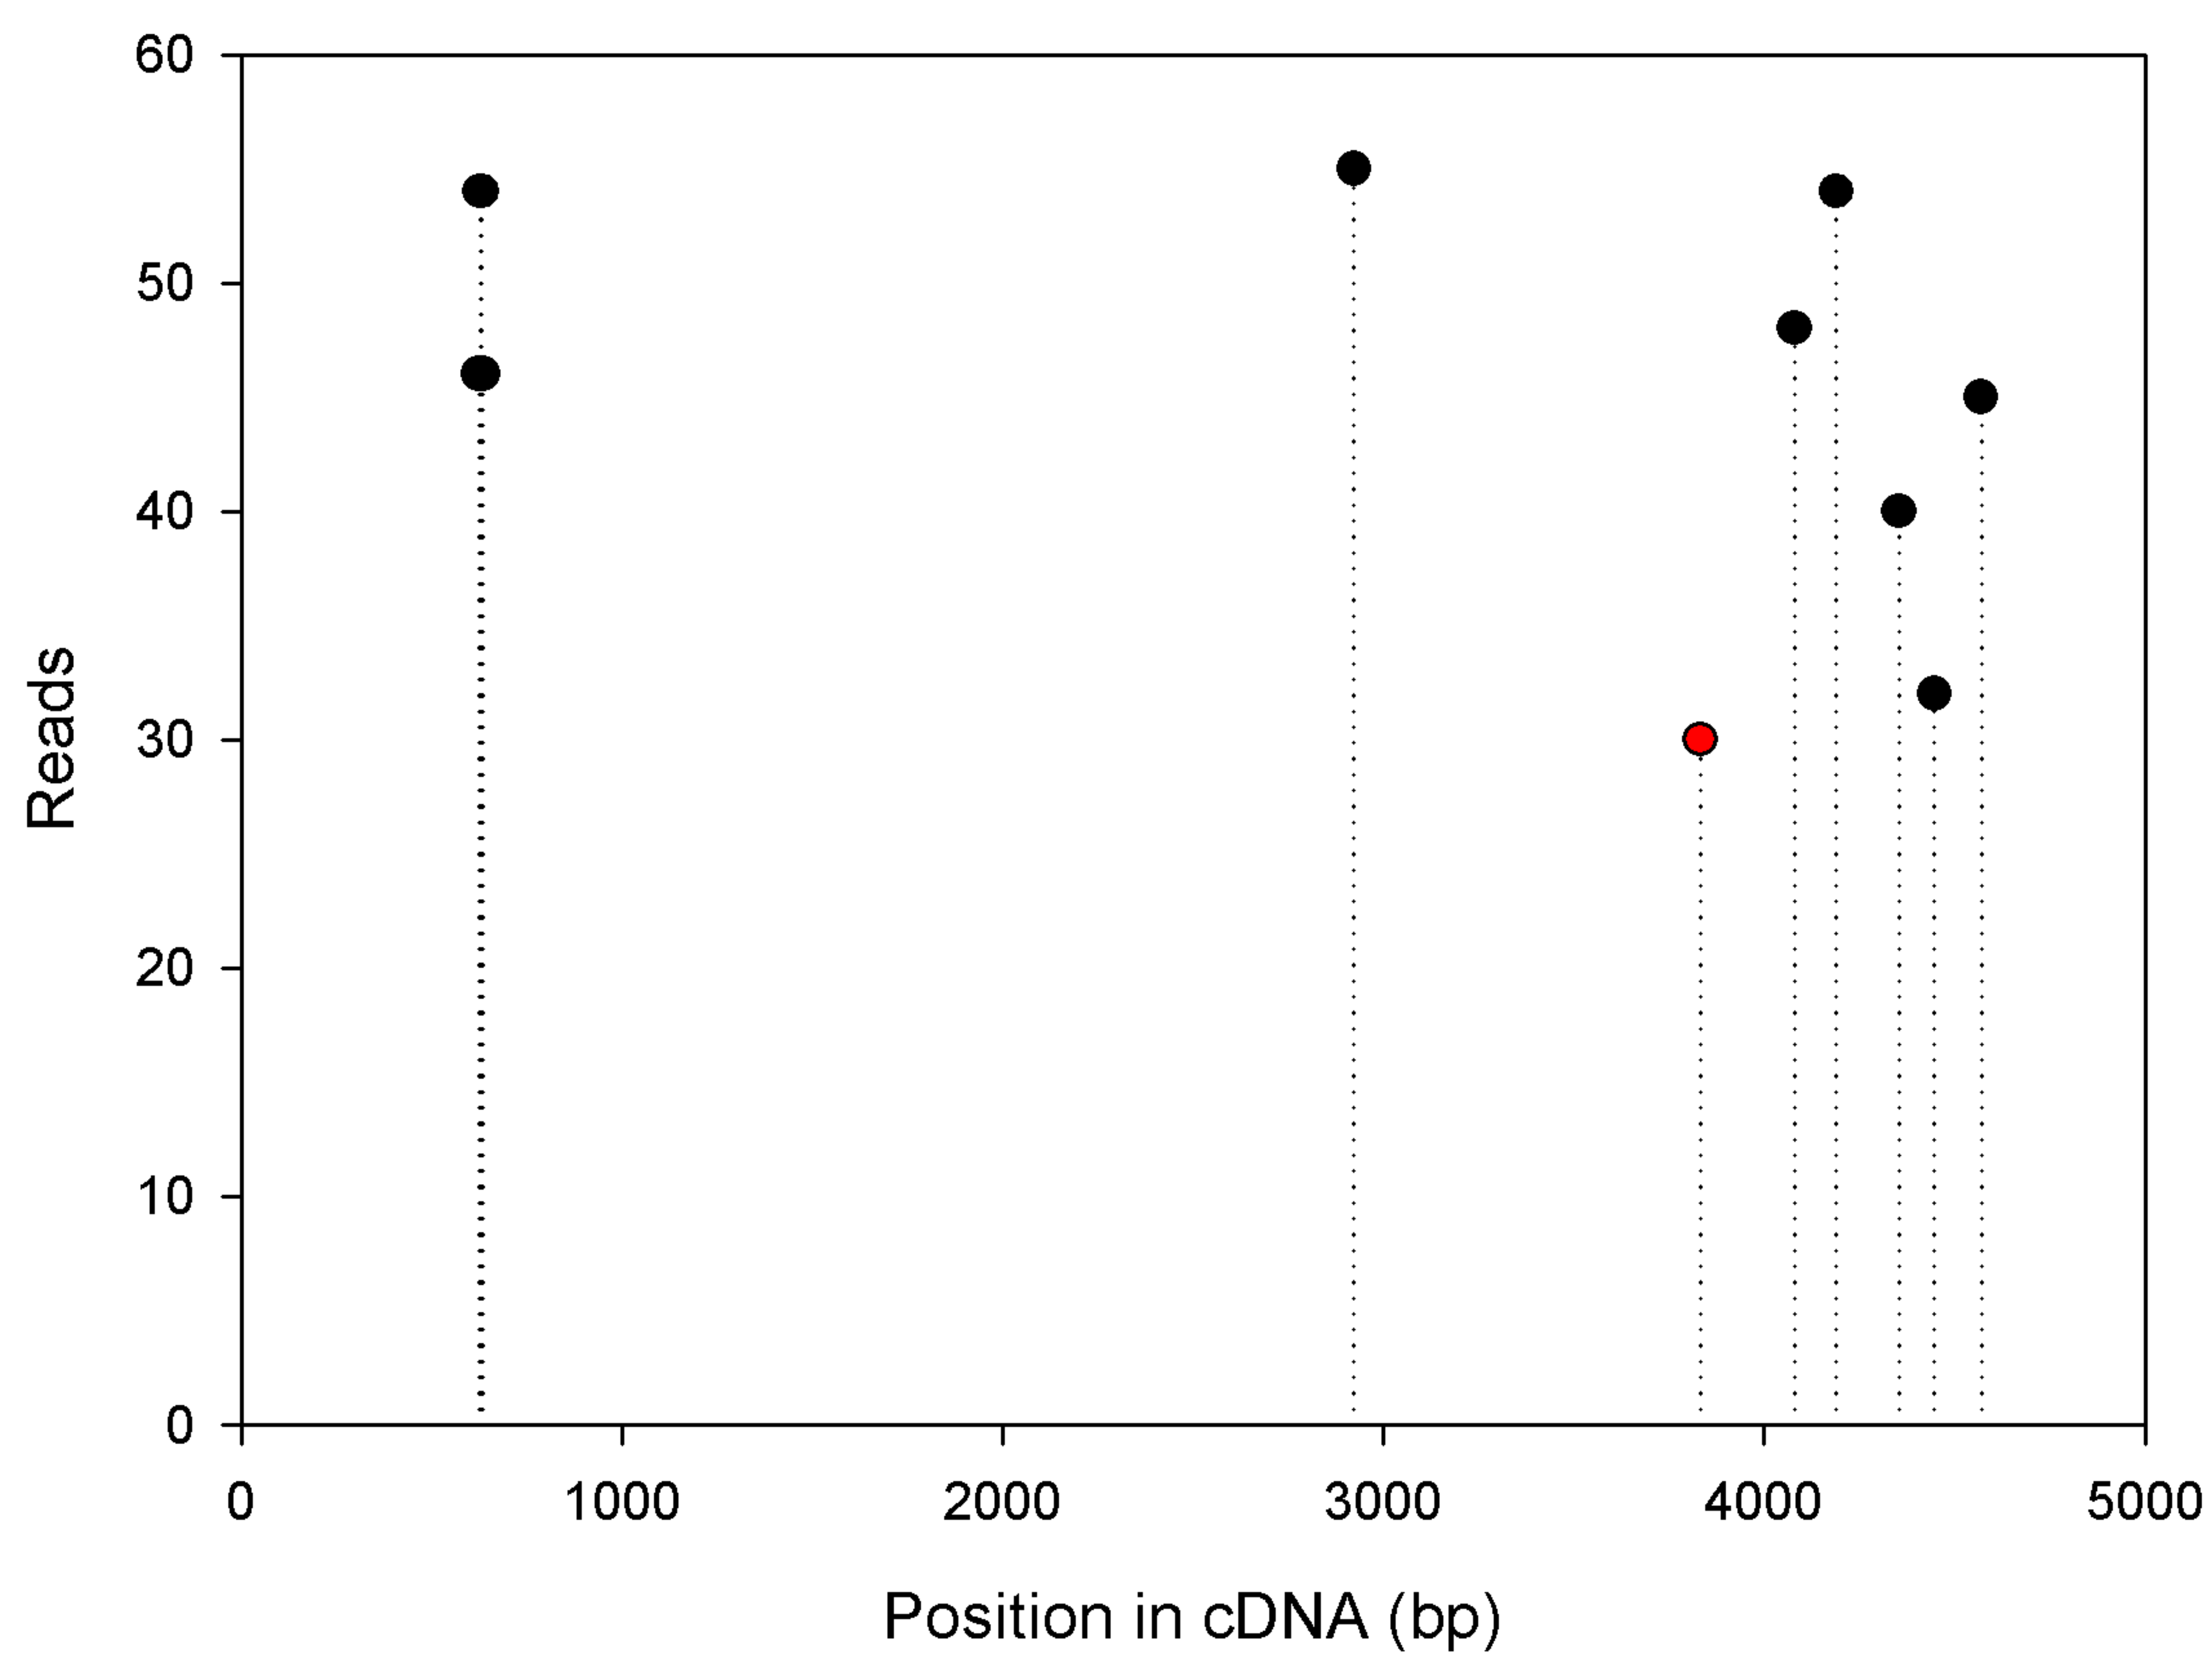

5' GCCGUCCUAUUCU-CUCCAUACUGAU 3'

.....

3' -----UAUGAGAUGAAGGUAAGACUA 5'

Cs7g19680.1

Csi-miRN20-Cs3g05320.1-23

Csi-miRN20-Cs3g05320.1-26, target=Cs2g16940.1 gene=Cs2g16940  
 Category:3  
 Score:5  
 Cleavage site:517

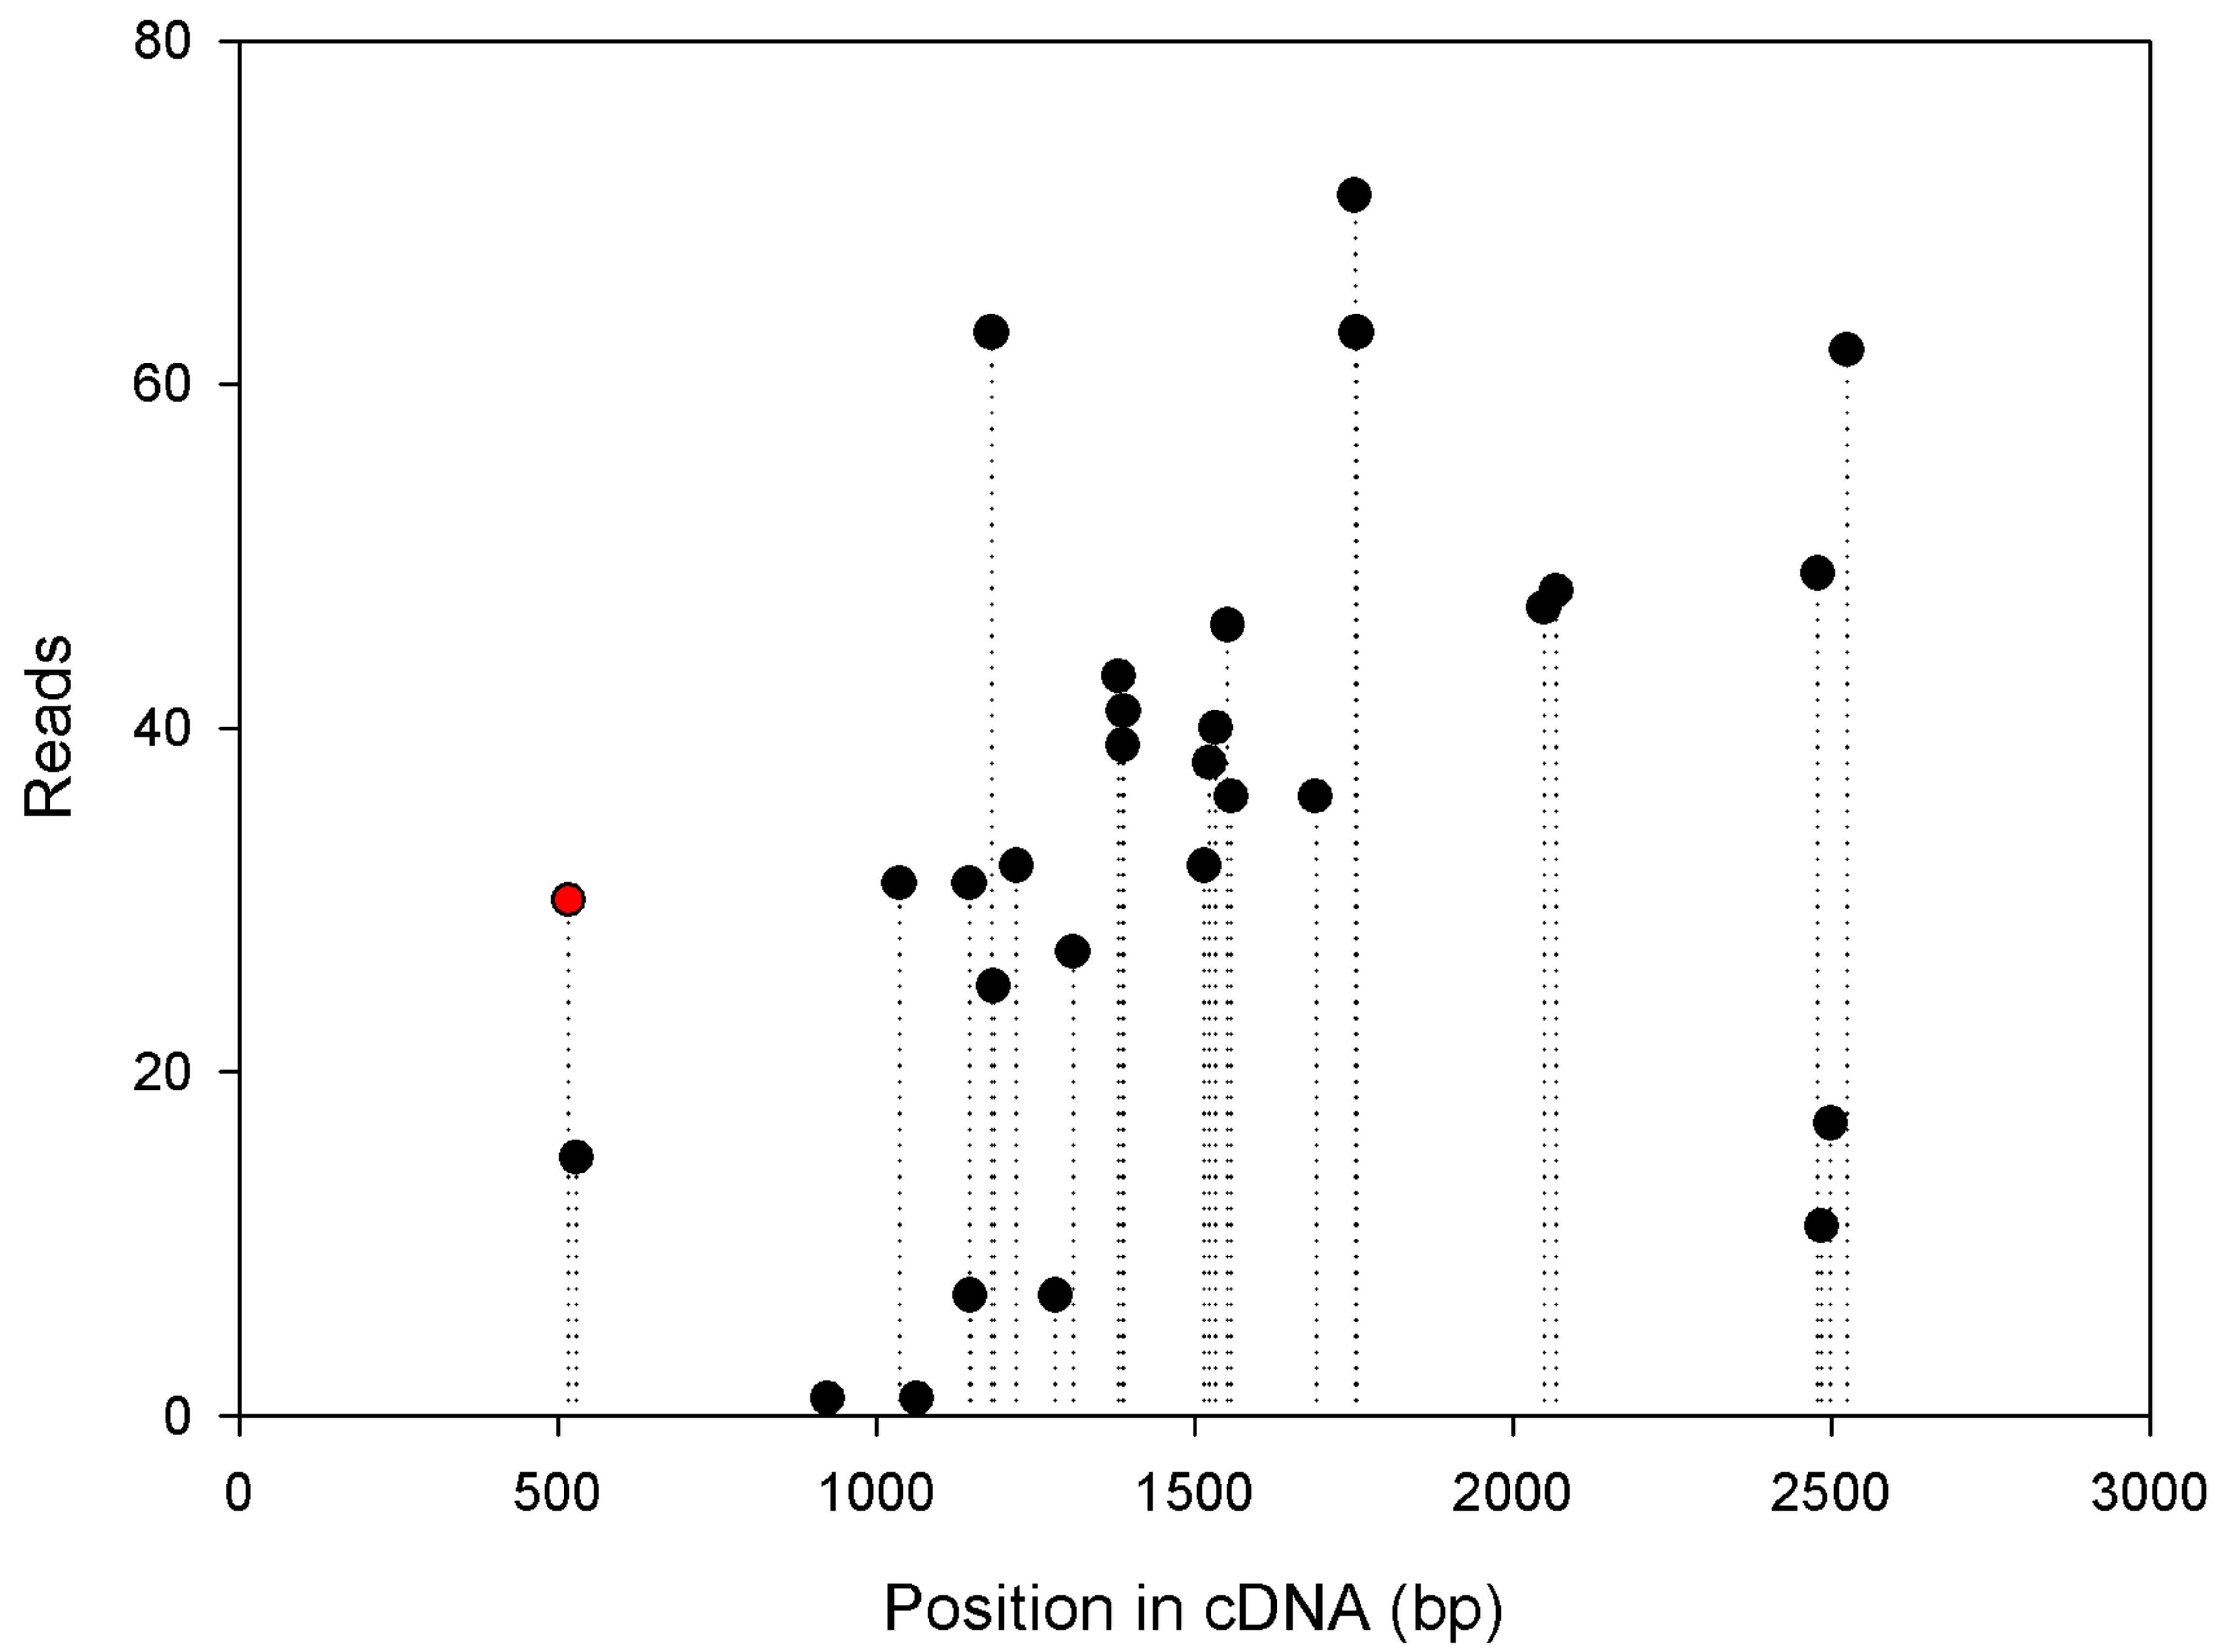

```

5' UAAAGCCUUCUCUUUGUUUCUGAGC 3'
   .. : : : : : : : : : : : : : :
3' --GUUAGAAGAGAGACAAAAGGU--- 5'
  
```

Cs2g16940.1

Csi-miRN20-Cs3g05320.1-26

Csi-miRN20-Cs3g05320.1-26, target=Cs6g18830.1 gene=Cs6g18830  
 Category:3  
 Score:5  
 Cleavage site:677

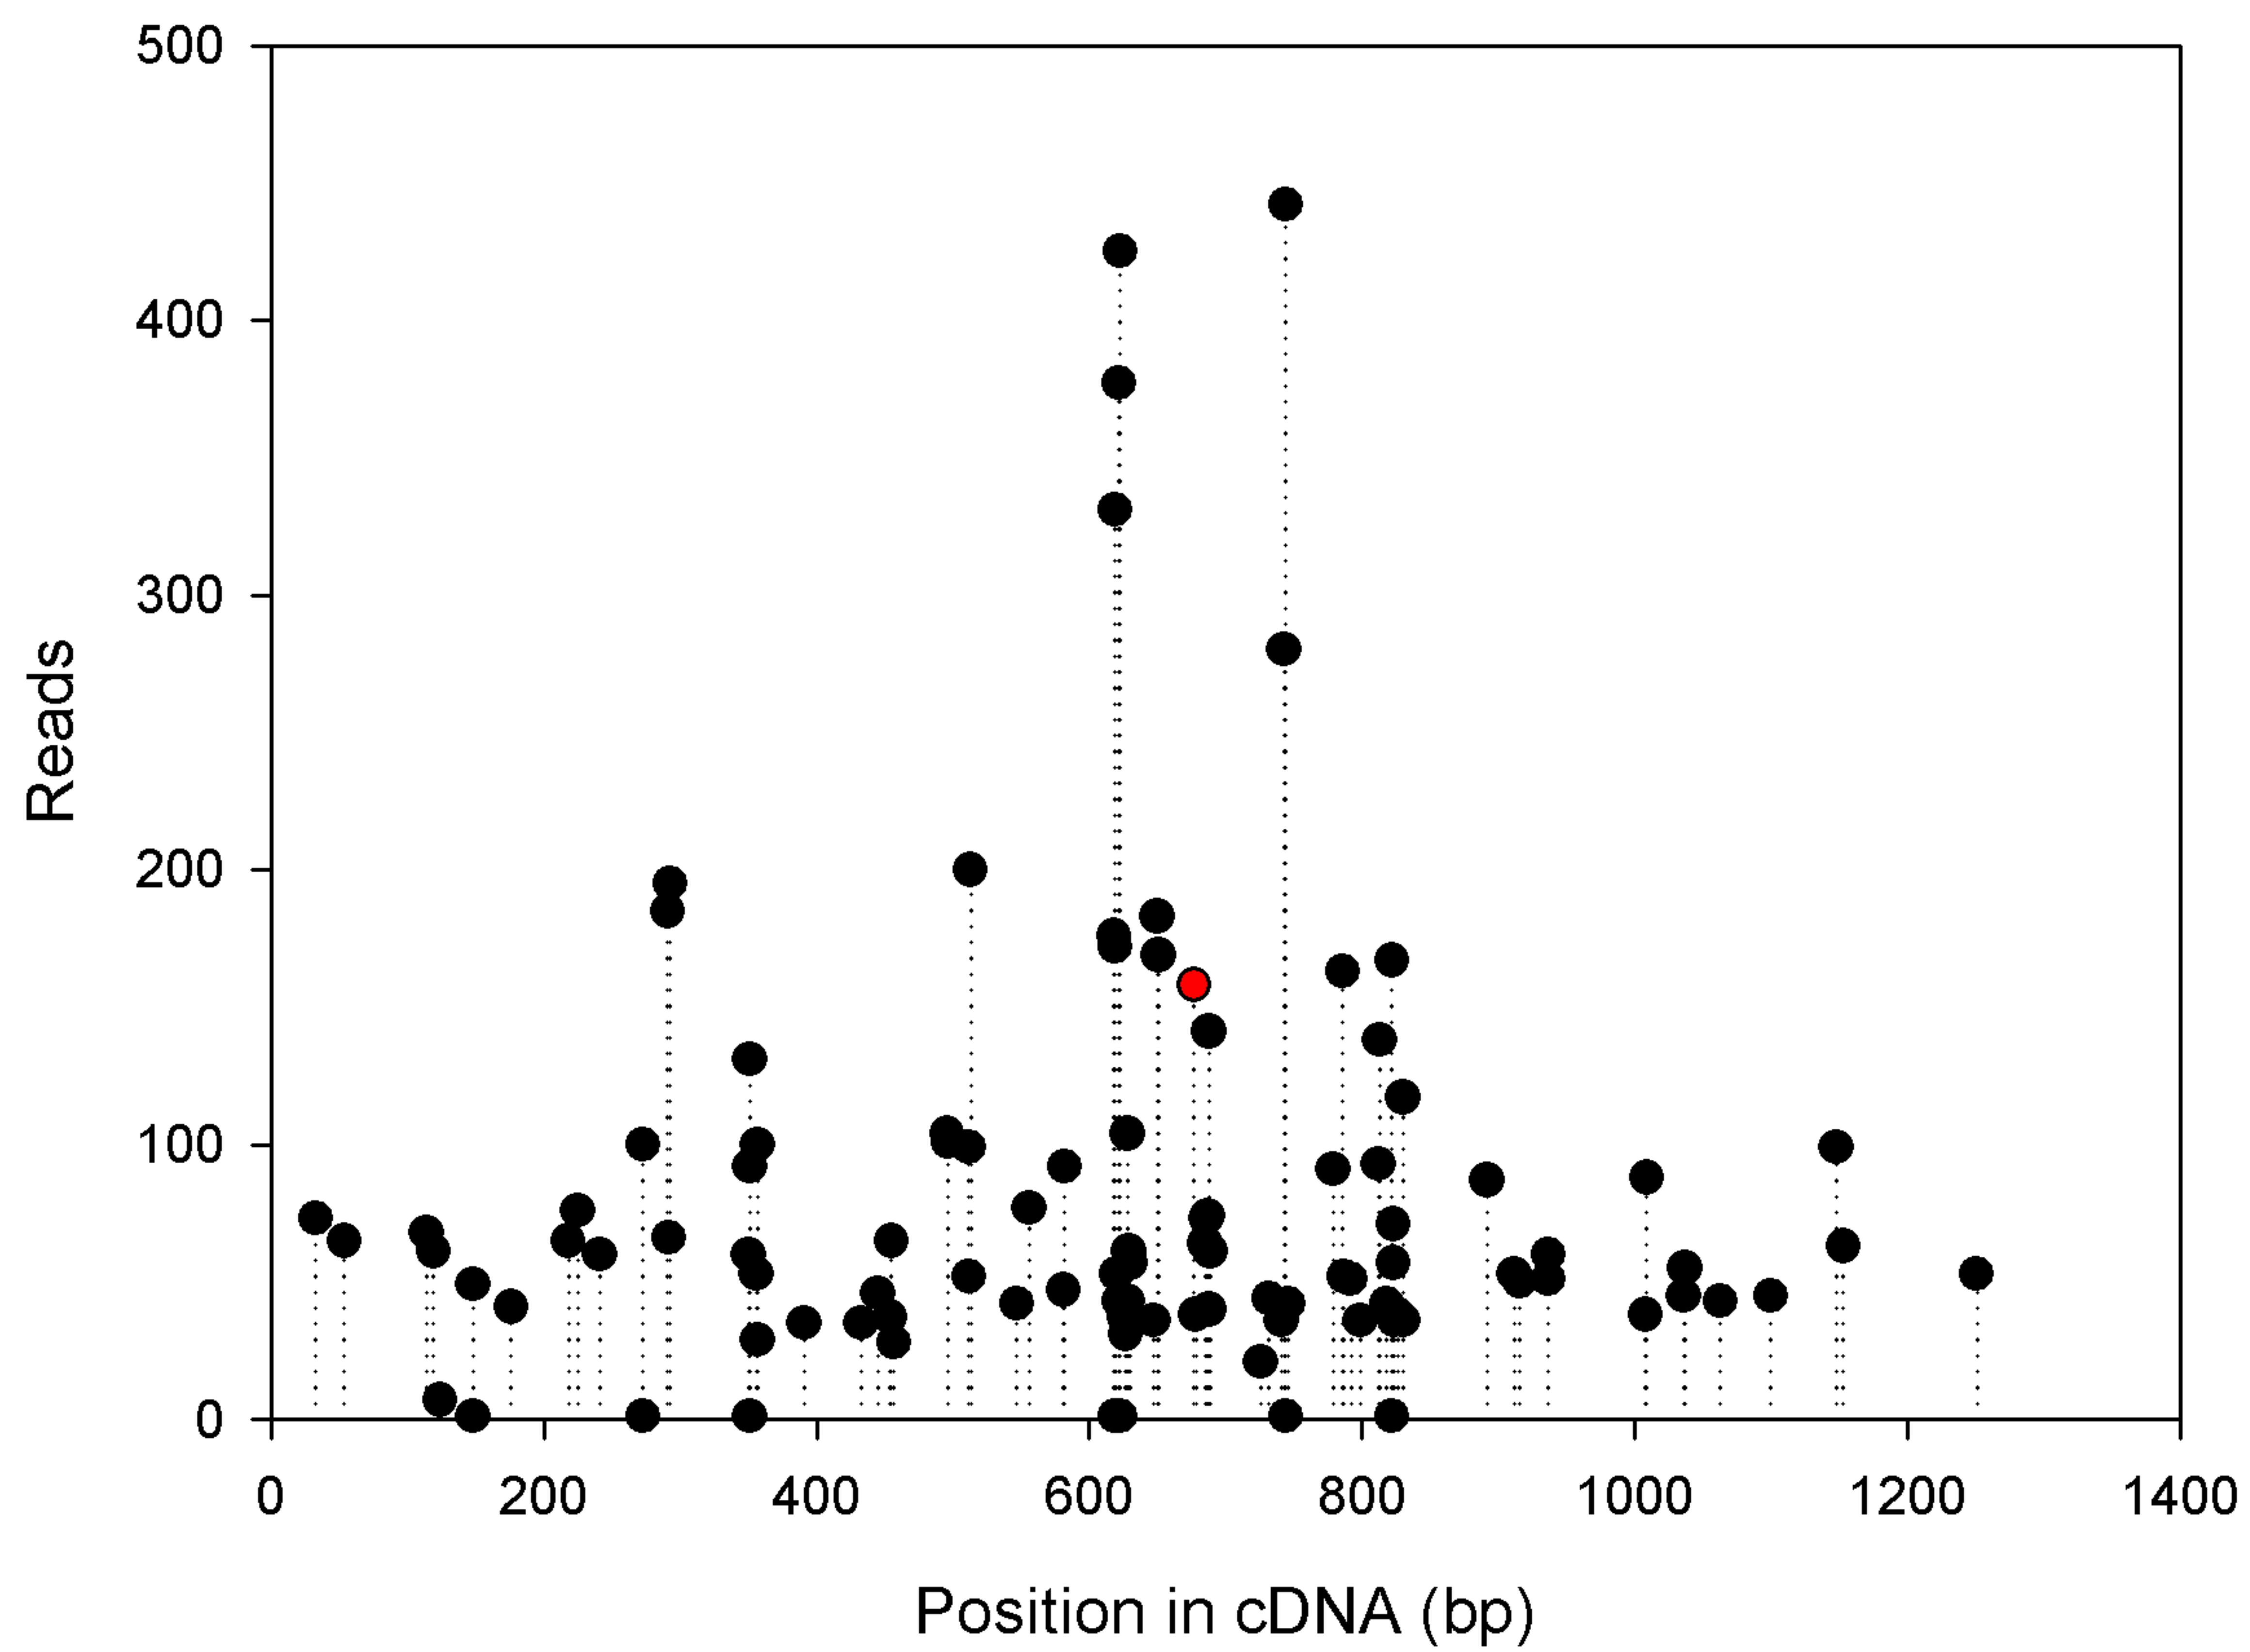

5' GCACUCAACUUCUCUGUUUUCUACUA 3'  
 :: :: : :::::::::::::::  
 3' -GUUAGAAG-AGAGACAAAAGGU--- 5'

Cs6g18830.1

Csi-miRN20-Cs3g05320.1-26
