# Supplementary material for: Genome-wide comparison of microRNAs and their targeted transcripts among leaf, flower and fruit of sweet orange
Source: PubMed Central journal article supplement (PMC4158063; doi:10.1186/1471-2164-15-695), 2014-08-20

**Additional file 9: Comparative analysis of the presence of SSRs in zma-miR396 and the resulting expression pattern among different tissues in maize.** Sequences data were collected from miRBase, the expression data were come from the publication of Zhang et al [1].

Sequences of pre-zma-miR396

>zma-MIR396a MI0001801

ACAUGGCCCUCCUUGCCGUCUCCACAGCUUUCUUGAACUGCAUGCCGCCGGCUGGUGGAUGCUGC  
GCGCUUGAAUCCGGUCGAUCCCAAGAGGCGCAGUUCAUAAAGCUGUGGGAAACUGCAGAGAGAG  
GCCAC

>zma-MIR396b MI0001800

AGAUGGCCUUCUUGUGAUCUCCACAGCUUUCUUGAACUGCAUCUCUCAGAGGAGCGGCAGCUUC  
AACUCCUCCACCCGAUCAGCAGGUGCAUGCAGUUCAUAAAGCUGUGGGAAACUGCAGAGAGAGGC  
CAG

>zma-MIR396c MI0010569

CGGGCAUGCUIUCCACAGGCUUUCUUGAACUGUGAACUCGUGGGUGGUGGUGGUAUGUCGGAUGG  
AAUGCUUGG

>zma-MIR396d MI0010570

CGGGCAUGCUIUCCACAGGCUUUCUUGAACUGUGAACUCGUGGGCGUGGUGGUGGUGGUCUGGU  
GCUGGGUGU

>zma-MIR396e MI0013225

UUUCCACAGCUUUCUUGAACCUUCUUCUUCUUCUCUCUCUUGAAGGGCCGUUAGCUUCUUGAAC  
CUCUCUCUCUCUCUCUCUCUCAAAGUGUACACGAACACUUCUUCUUCUUCUGCCUCUCGCUCUCUGA  
UCUCCGAAGAAGGUCAAGAAAGCCGUGGGAAGA

>zma-MIR396f MI0013226

UUUCCACAGCUUUCUUGAACCUUCUUCUUCUUCUUCUCUCUUGGAACGGCAGCUUUCUUCGAAUCU  
GUCUCUCUCUCUCUCUCUCUUCUUCUCCGAAGACGAAGGUCAAGAAAGCUGUGGGAAGA

>zma-MIR396g MI0013227

UUCCCACAGCUUUAUUGAACUGCCUCUUGCUUGCUUGGAUCAAUUGAAACUCGAUCAGGUCCACA  
GCACAGCCUGCUGCAUGCAUGAUGCAGUUCAAGAAAGCUGUGGAAGAU

1. Zhang L, Chia J-M, Kumari S, Stein JC, Liu Z, Narechania A, Maher CA, Guill K, McMullen MD, Ware D: **A genome-wide characterization of microRNA genes in maize.** *PLoS Genet* 2009, **5**:e1000716.

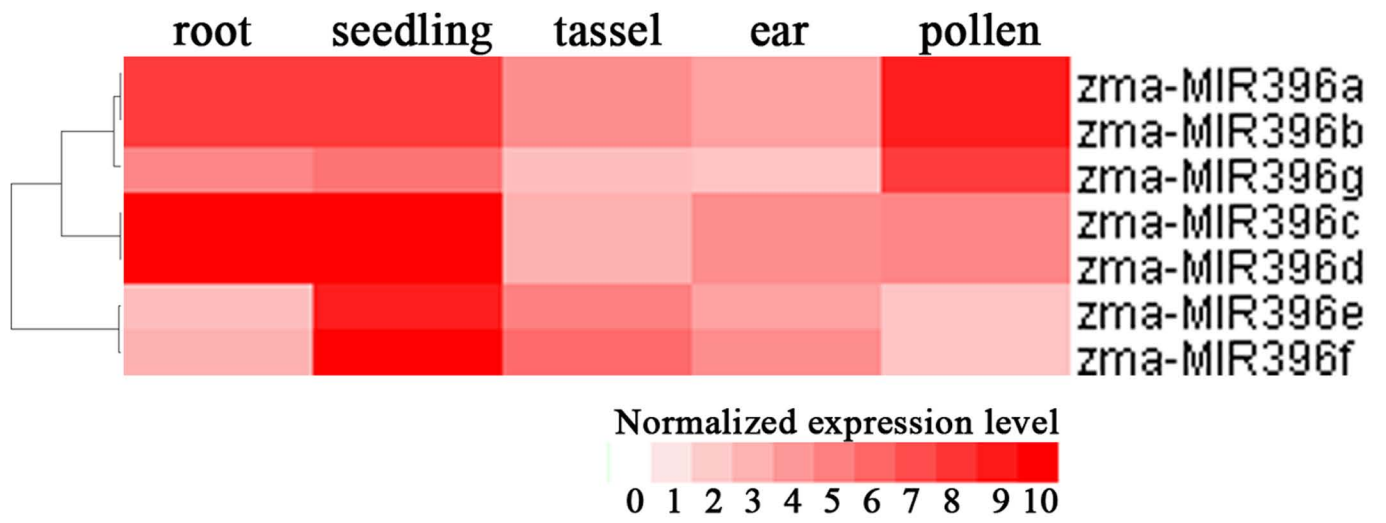

Supplement: 12864_2014_6413_MOESM9_ESM.pdf [file 12864_2014_6413_MOESM9_ESM.pdf]
