# Supplementary material for: Genome-wide comparison of microRNAs and their targeted transcripts among leaf, flower and fruit of sweet orange
Source: PubMed Central journal article supplement (PMC4158063; doi:10.1186/1471-2164-15-695), 2014-08-20
Supplement: 12864_2014_6413_MOESM10_ESM.pdf [file 12864_2014_6413_MOESM10_ESM.pdf]

**Additional file 10. Clusters of miRNAs.** Two miRNAs located within a single precursor are shown. The mature miRNA sequences are highlighted in yellow and the miRNA\* sequences are highlighted in gray. The mismatched nucleotide is highlighted in red. Data in the tables show the digital expression levels (TPM) of miRNAs in different tissues. (a) Csi-miR166j.1 and Csi-miR166j.3. (b) Csi-miR477d.1-3p and Csi-miR477d.2-5p.

**(a)**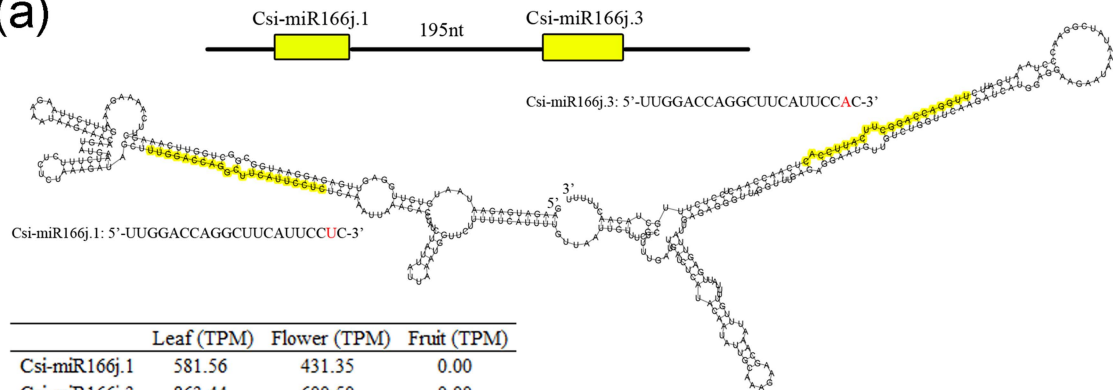

|               | Leaf (TPM) | Flower (TPM) | Fruit (TPM) |
|---------------|------------|--------------|-------------|
| Csi-miR166j.1 | 581.56     | 431.35       | 0.00        |
| Csi-miR166j.3 | 863.44     | 600.50       | 0.00        |

**(b)**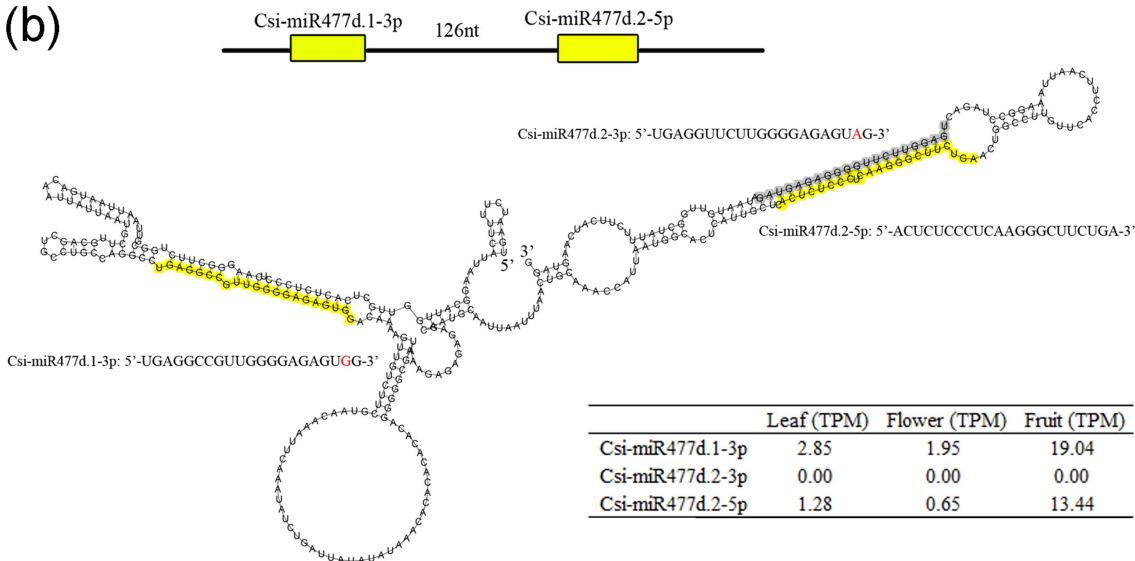

|                  | Leaf (TPM) | Flower (TPM) | Fruit (TPM) |
|------------------|------------|--------------|-------------|
| Csi-miR477d.1-3p | 2.85       | 1.95         | 19.04       |
| Csi-miR477d.2-3p | 0.00       | 0.00         | 0.00        |
| Csi-miR477d.2-5p | 1.28       | 0.65         | 13.44       |
