# Supplementary material for: Genome-wide comparison of microRNAs and their targeted transcripts among leaf, flower and fruit of sweet orange
Source: PubMed Central journal article supplement (PMC4158063; doi:10.1186/1471-2164-15-695), 2014-08-20
Supplement: 12864_2014_6413_MOESM12_ESM.pdf [file 12864_2014_6413_MOESM12_ESM.pdf]

# Additional file 12: Flow chart to identify the phased siRNAs and their target transcripts

Step 1

sRNAome data

22nt miRNA

Degradome data

1. Obtain all miRNAs with length of 22 nt from sRNAome data and their target transcripts from degradome data.
2. Predict all 21 nt standard phased siRNAs generated from the cleavage site of target transcripts to 3' end of targets one by one.
3. Check the expression level and target transcripts of phased siRNAs from sRNAome and degradome data.

Step 2

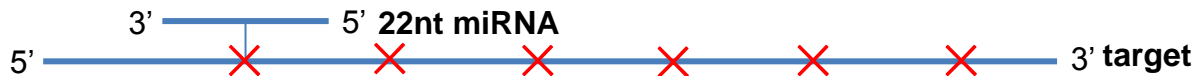

21nt phased siRNA 5' 3' 5' 3' 5' 3' 5' 3' 5' 3'

Step 3

sRNAome data

Degradome data

The digital expressions (TPM) of phased siRNA

Target transcripts of phased siRNA
