# Supplementary material for: Genome-wide comparison of microRNAs and their targeted transcripts among leaf, flower and fruit of sweet orange
Source: PubMed Central journal article supplement (PMC4158063; doi:10.1186/1471-2164-15-695), 2014-08-20
Supplement: 12864_2014_6413_MOESM13_ESM.pdf [file 12864_2014_6413_MOESM13_ESM.pdf]

### Additional file 13. Primers used in miRNA stem-loop RT-PCR

| Stem-loop reverse transcription Primer |                                                     |
|----------------------------------------|-----------------------------------------------------|
| RT_csi-miR1092.2                       | GTCGTATCCAGTGCAGGGTCCGAGGTATTCGCACTGGATACGACGGAAT   |
| RT_csi-miR1432a                        | GTCGTATCCAGTGCAGGGTCCGAGGTATTCGCACTGGATACGACTGACGG  |
| RT_csi-miR1446                         | GTCGTATCCAGTGCAGGGTCCGAGGTATTCGCACTGGATACGACGCCGTT  |
| RT_csi-miR156c.1                       | GTCGTATCCAGTGCAGGGTCCGAGGTATTCGCACTGGATACGACTGTGCT  |
| RT_csi-miR156e                         | GTCGTATCCAGTGCAGGGTCCGAGGTATTCGCACTGGATACGACGCGCTC  |
| RT_csi-miR156g.1                       | GTCGTATCCAGTGCAGGGTCCGAGGTATTCGCACTGGATACGACGTGCTC  |
| RT_csi-miR159                          | GTCGTATCCAGTGCAGGGTCCGAGGTATTCGCACTGGATACGACTAGAGC  |
| RT_csi-miR160b-3p                      | GTCGTATCCAGTGCAGGGTCCGAGGTATTCGCACTGGATACGACTATGCT  |
| RT_csi-miR162-3p.1                     | GTCGTATCCAGTGCAGGGTCCGAGGTATTCGCACTGGATACGACCTGGAT  |
| RT_csi-miR164                          | GTCGTATCCAGTGCAGGGTCCGAGGTATTCGCACTGGATACGACTGCACG  |
| RT_csi-miR166a.2                       | GTCGTATCCAGTGCAGGGTCCGAGGTATTCGCACTGGATACGACGGGGAA  |
| RT_csi-miR166d.2                       | GTCGTATCCAGTGCAGGGTCCGAGGTATTCGCACTGGATACGACAGGGAA  |
| RT_csi-miR166g.1                       | GTCGTATCCAGTGCAGGGTCCGAGGTATTCGCACTGGATACGACGGAATG  |
| RT_csi-miR166j.1                       | GTCGTATCCAGTGCAGGGTCCGAGGTATTCGCACTGGATACGACGAGGAA  |
| RT_csi-miR166j.3                       | GTCGTATCCAGTGCAGGGTCCGAGGTATTCGCACTGGATACGACGTGGAA  |
| RT_csi-miR167b.2                       | GTCGTATCCAGTGCAGGGTCCGAGGTATTCGCACTGGATACGACTAAGAT  |
| RT_csi-miR167d.1                       | GTCGTATCCAGTGCAGGGTCCGAGGTATTCGCACTGGATACGACTCAGAT  |
| RT_csi-miR168a                         | GTCGTATCCAGTGCAGGGTCCGAGGTATTCGCACTGGATACGACTTCCCG  |
| RT_csi-miR169m.1                       | GTCGTATCCAGTGCAGGGTCCGAGGTATTCGCACTGGATACGACCCGGCA  |
| RT_csi-miR171a.1                       | GTCGTATCCAGTGCAGGGTCCGAGGTATTCGCACTGGATACGACTTTGAT  |
| RT_csi-miR171b                         | GTCGTATCCAGTGCAGGGTCCGAGGTATTCGCACTGGATACGACGAGTGA  |
| RT_csi-miR171g.1                       | GTCGTATCCAGTGCAGGGTCCGAGGTATTCGCACTGGATACGACGATATT  |
| RT_csi-miR172a-3p.2                    | GTCGTATCCAGTGCAGGGTCCGAGGTATTCGCACTGGATACGACTTGCAG  |
| RT_csi-miR172c.2                       | GTCGTATCCAGTGCAGGGTCCGAGGTATTCGCACTGGATACGACCTGCAG  |
| RT_csi-miR172d                         | GTCGTATCCAGTGCAGGGTCCGAGGTATTCGCACTGGATACGACATGCAG  |
| RT_csi-miR2275c.1                      | GTCGTATCCAGTGCAGGGTCCGAGGTATTCGCACTGGATACGACTAAAAT  |
| RT_csi-miR2911                         | GTCGTATCCAGTGCAGGGTCCGAGGTATTCGCACTGGATACGACTCCCA   |
| RT_csi-miR390.1                        | GTCGTATCCAGTGCAGGGTCCGAGGTATTCGCACTGGATACGACGGCGCT  |
| RT_csi-miR390.2                        | GTCGTATCCAGTGCAGGGTCCGAGGTATTCGCACTGGATACGACGGCGCT  |
| RT_csi-miR390b                         | GTCGTATCCAGTGCAGGGTCCGAGGTATTCGCACTGGATACGACTTGTCT  |
| RT_csi-miR391b                         | GTCGTATCCAGTGCAGGGTCCGAGGTATTCGCACTGGATACGACGGTGCC  |
| RT_csi-miR393b                         | GTCGTATCCAGTGCAGGGTCCGAGGTATTCGCACTGGATACGACGATCAA  |
| RT_csi-miR394-3p.1                     | GTCGTATCCAGTGCAGGGTCCGAGGTATTCGCACTGGATACGACTAGTTT  |
| RT_csi-miR395.1                        | GTCGTATCCAGTGCAGGGTCCGAGGTATTCGCACTGGATACGACGAGTTC  |
| RT_csi-miR3951                         | GTCGTATCCAGTGCAGGGTCCGAGGTATTCGCACTGGATACGACTTTTTTC |
| RT_csi-miR3951-3p                      | GTCGTATCCAGTGCAGGGTCCGAGGTATTCGCACTGGATACGACACAGAT  |
| RT_Csi-miR3952.1                       | GTCGTATCCAGTGCAGGGTCCGAGGTATTCGCACTGGATACGACTTGAGG  |
| RT_csi-miR3952-3p                      | GTCGTATCCAGTGCAGGGTCCGAGGTATTCGCACTGGATACGACGTGCTC  |
| RT_csi-miR3954a                        | GTCGTATCCAGTGCAGGGTCCGAGGTATTCGCACTGGATACGACTGACCG  |
| RT_csi-miR396b.2                       | GTCGTATCCAGTGCAGGGTCCGAGGTATTCGCACTGGATACGACTTCAAG  |
| RT_csi-miR396b-3p.1                    | GTCGTATCCAGTGCAGGGTCCGAGGTATTCGCACTGGATACGACTCTCCC  |
| RT_csi-miR396d.4                       | GTCGTATCCAGTGCAGGGTCCGAGGTATTCGCACTGGATACGACTTCAAG  |
| RT_csi-miR397.1                        | GTCGTATCCAGTGCAGGGTCCGAGGTATTCGCACTGGATACGACCATCAA  |
| RT_csi-miR398b                         | GTCGTATCCAGTGCAGGGTCCGAGGTATTCGCACTGGATACGACCAGGGG  |
| RT_csi-miR399a                         | GTCGTATCCAGTGCAGGGTCCGAGGTATTCGCACTGGATACGACCCGGGC  |
| RT_csi-miR399b                         | GTCGTATCCAGTGCAGGGTCCGAGGTATTCGCACTGGATACGACTAGGGC  |
| RT_csi-miR399c                         | GTCGTATCCAGTGCAGGGTCCGAGGTATTCGCACTGGATACGACCAGGGC  |
| RT_csi-miR403.1                        | GTCGTATCCAGTGCAGGGTCCGAGGTATTCGCACTGGATACGACAGTTTG  |
| RT_Csi-miR408.1                        | GTCGTATCCAGTGCAGGGTCCGAGGTATTCGCACTGGATACGACCATGCT  |
| RT_csi-miR4414.1                       | GTCGTATCCAGTGCAGGGTCCGAGGTATTCGCACTGGATACGACTGAACC  |

|                     |                                                    |
|---------------------|----------------------------------------------------|
| RT_Csi-miR444a.2    | GTCGTATCCAGTGCAGGGTCCGAGGTATTCGCACTGGATACGACGATGCA |
| RT_csi-miR473       | GTCGTATCCAGTGCAGGGTCCGAGGTATTCGCACTGGATACGACGCGAAG |
| RT_csi-miR477a-3p   | GTCGTATCCAGTGCAGGGTCCGAGGTATTCGCACTGGATACGACCGACCT |
| RT_csi-miR477d.1-3p | GTCGTATCCAGTGCAGGGTCCGAGGTATTCGCACTGGATACGACCCACTC |
| RT_csi-miR479.1     | GTCGTATCCAGTGCAGGGTCCGAGGTATTCGCACTGGATACGACGATGAG |
| RT_csi-miR482a-5p   | GTCGTATCCAGTGCAGGGTCCGAGGTATTCGCACTGGATACGACCTTCTT |
| RT_csi-miR482d-5p.1 | GTCGTATCCAGTGCAGGGTCCGAGGTATTCGCACTGGATACGACCTCCC  |
| RT_csi-miR482d-5p.2 | GTCGTATCCAGTGCAGGGTCCGAGGTATTCGCACTGGATACGACTATCTT |
| RT_csi-miR5179      | GTCGTATCCAGTGCAGGGTCCGAGGTATTCGCACTGGATACGACATTGCG |
| RT_csi-miR530b      | GTCGTATCCAGTGCAGGGTCCGAGGTATTCGCACTGGATACGACCAAGAT |
| RT_csi-miR535.1     | GTCGTATCCAGTGCAGGGTCCGAGGTATTCGCACTGGATACGACGTGTGC |
| RT_csi-miR536-3p    | GTCGTATCCAGTGCAGGGTCCGAGGTATTCGCACTGGATACGACGACGCA |
| RT_csi-miR814       | GTCGTATCCAGTGCAGGGTCCGAGGTATTCGCACTGGATACGACCTCATC |
| RT_csi-miR827.1     | GTCGTATCCAGTGCAGGGTCCGAGGTATTCGCACTGGATACGACTGTTTG |
| RT_csi-miR827-5p.1  | GTCGTATCCAGTGCAGGGTCCGAGGTATTCGCACTGGATACGACTTAGAT |
| RT_csi-miRN03       | GTCGTATCCAGTGCAGGGTCCGAGGTATTCGCACTGGATACGACAACACC |
| RT_csi-miRN04       | GTCGTATCCAGTGCAGGGTCCGAGGTATTCGCACTGGATACGACTGTAAC |
| RT_csi-miRN07       | GTCGTATCCAGTGCAGGGTCCGAGGTATTCGCACTGGATACGACCACCGT |
| RT_csi-miRN08       | GTCGTATCCAGTGCAGGGTCCGAGGTATTCGCACTGGATACGACGTCCAG |
| RT_csi-miRN11       | GTCGTATCCAGTGCAGGGTCCGAGGTATTCGCACTGGATACGACAACCGT |
| RT_csi-miRN12       | GTCGTATCCAGTGCAGGGTCCGAGGTATTCGCACTGGATACGACTCTTAG |
| RT_csi-miRN15       | GTCGTATCCAGTGCAGGGTCCGAGGTATTCGCACTGGATACGACGTTGGT |
| RT_csi-miRN16       | GTCGTATCCAGTGCAGGGTCCGAGGTATTCGCACTGGATACGACTATCAT |
| RT_csi-miRN24       | GTCGTATCCAGTGCAGGGTCCGAGGTATTCGCACTGGATACGACATTAGC |
| RT_csi-miRN25       | GTCGTATCCAGTGCAGGGTCCGAGGTATTCGCACTGGATACGACAATGCC |
| RT_csi-miRN26       | GTCGTATCCAGTGCAGGGTCCGAGGTATTCGCACTGGATACGACTTTCAT |
| RT_csi-miRN31       | GTCGTATCCAGTGCAGGGTCCGAGGTATTCGCACTGGATACGACCCGAAC |
| RT_csi-miRN32       | GTCGTATCCAGTGCAGGGTCCGAGGTATTCGCACTGGATACGACGCCCTT |
| RT_csi-miRN36       | GTCGTATCCAGTGCAGGGTCCGAGGTATTCGCACTGGATACGACTTTCGC |
| RT_csi-miRN37       | GTCGTATCCAGTGCAGGGTCCGAGGTATTCGCACTGGATACGACCCTTCT |

Forward primer for qRT-PCR

|                     |                       |
|---------------------|-----------------------|
| FOR_csi-miR1092.2   | ATTCGTTCCACCAAAGCATTC |
| FOR_csi-miR1432a    | ATTCGTGCAGGTGAGATGATA |
| FOR_csi-miR1446     | ATTCGCGAACTCTCTCCCTC  |
| FOR_csi-miR156c.1   | ATCCGTGACAGAAGAGAGTG  |
| FOR_csi-miR156e     | ACGGCGTGACAGAAGATAGA  |
| FOR_csi-miR156g.1   | ACGGCTTGACGGAAGATAGA  |
| FOR_csi-miR159      | ACGGCTTTGGATTGAAGGGA  |
| FOR_csi-miR160b-3p  | ATAATGCGTACGAGGAGCCA  |
| FOR_csi-miR162-3p.1 | ATCCGTCGATAAACCTCTGC  |
| FOR_csi-miR164      | ATCATTGGAGAAGCAGGGCA  |
| FOR_csi-miR166a.2   | ATCATTCGGACCAGGCTTCA  |
| FOR_csi-miR166d.2   | ATCATTCGGACCAGGCTTCA  |
| FOR_csi-miR166g.1   | ATCATTTCTCGACCAGGCTT  |
| FOR_csi-miR166j.1   | ATTCGTTGGACCAGGCTTCA  |
| FOR_csi-miR166j.3   | ATTCGTTGGACCAGGCTTCA  |
| FOR_csi-miR167b.2   | ATAATTGAAGCTGCCAGCATG |
| FOR_csi-miR167d.1   | ATAATTGAAGCTGCCAGCATG |
| FOR_csi-miR168a     | ATCATTCGCTTGGTGCAGGT  |

|                      |                        |
|----------------------|------------------------|
| FOR_csi-miR169m.1    | ATTCGCAGCCAAGGATGACT   |
| FOR_csi-miR171a.1    | ATTCGTGTTGGAACGGCTCA   |
| FOR_csi-miR171b      | ATCCGCGAGCCGAATCAATA   |
| FOR_csi-miR171g.1    | ATCATTGATTGAGCCGTGCC   |
| FOR_csi-miR172a-3p.2 | CGCCGAGAATCTTGATGATG   |
| FOR_csi-miR172c.2    | ATCCGTGGAATCTTGATGATG  |
| FOR_csi-miR172d      | CGCCGAGAATCTTGATGATG   |
| FOR_csi-miR2275c.1   | CGCCGTTTAATTTCCCTCCAAT |
| FOR_csi-miR2911      | CCCGGCCGGGGGACGGA      |
| FOR_csi-miR390.1     | ATTCGAAGCTCAGGAGGGAT   |
| FOR_csi-miR390.2     | ATTCGAGCTCAGGAGGGAT    |
| FOR_csi-miR390b      | ATCATCAGCTCAGGAGGGAT   |
| FOR_csi-miR391b      | ATAATTTGTCGCAGGAGCGTT  |
| FOR_csi-miR393b      | ATCATTTCCAAAGGGATCGCA  |
| FOR_csi-miR394-3p.1  | ATCCGAGCTGGACAAATTGC   |
| FOR_csi-miR395.1     | ATTCGCTGAAGTGTTTGGGG   |
| FOR_csi-miR3951      | CGGCGTAGATAAAGATGAGA   |
| FOR_csi-miR3951-3p   | CGGCGTTTCTCTTATCGTT    |
| FOR_Csi-miR3952.1    | ATCCGTGCTGTAGAAAAGGCC  |
| FOR_csi-miR3952-3p   | ATCCGTGAAGGGCCTTTCTA   |
| FOR_csi-miR3954a     | ATCCGTTGGACAGAGAAATCA  |
| FOR_csi-miR396b.2    | CGGCGTTCCACAGCTTT      |
| FOR_csi-miR396b-3p.1 | ATCCGGCTCAAGAAAGCTGT   |
| FOR_csi-miR396d.4    | CGGCGTTCCACGGCTTT      |
| FOR_csi-miR397.1     | ATTCGTCATTGAGTGCAGCG   |
| FOR_csi-miR398b      | ATTCGTGTGTTCTCAGGTCG   |
| FOR_csi-miR399a      | ACGGCTGCCAAAGGAGATTT   |
| FOR_csi-miR399b      | ATCCGTGCCAAAGGAGAGTT   |
| FOR_csi-miR399c      | ATCCGCGCCAAAGGAGAATT   |
| FOR_csi-miR403.1     | CGGCGTTAGATTCACGCA     |
| FOR_Csi-miR408.1     | ATTATACGGGGAACAGGCAG   |
| FOR_csi-miR4414.1    | ATTCGAGCTGCTGACTCGTT   |
| FOR_Csi-miR444a.2    | ATCCGTTTCTTGAGACAAAACA |
| FOR_csi-miR473       | ATCATACTCTCCCTCAAGGG   |
| FOR_csi-miR477a-3p   | ATAATGGAAACCCTAGGGGG   |
| FOR_csi-miR477d.1-3p | ATTATTGAGGCCGTTGGGGA   |
| FOR_csi-miR479.1     | ATTCGTGTGATATTGGTTCGG  |
| FOR_csi-miR482a-5p   | ATTAAGTGGGAGCGTGGGGT   |
| FOR_csi-miR482d-5p.1 | ATCGGTGGTATGGGTGAGTA   |
| FOR_csi-miR482d-5p.2 | ATTCGTATGGGTGAGTAGGG   |
| FOR_csi-miR5179      | ATTCGTCTTGCTCAAGACCG   |
| FOR_csi-miR530b      | ATTCGTGCATTTGCACCTGC   |
| FOR_csi-miR535.1     | ACGGCTGACAATGAGAGAGA   |
| FOR_csi-miR536-3p    | ATTATTGGTGCCACGCTGTG   |
| FOR_csi-miR814       | ACCGAAATTAGATTCGTTGTGT |
| FOR_csi-miR827.1     | CGGCGTTAGATGACCATCAA   |
| FOR_csi-miR827-5p.1  | ACGGCTGCTTGTTGATTGTC   |
| FOR_csi-miRN03       | CGATTTGTTTTGGGTGAAACG  |
| FOR_csi-miRN04       | ACGCGTTGTAGAGTGTGTAT   |
| FOR_csi-miRN07       | ACACGGGAAGACAAGATCAA   |
| FOR_csi-miRN08       | ATTCGCGGTCACAGCTCC     |

|                |                         |
|----------------|-------------------------|
| FOR_csi-miRN11 | ATTCGTCGCAGGAGCTTTCT    |
| FOR_csi-miRN12 | CGGCATCAATGGTTATGGCA    |
| FOR_csi-miRN15 | ATTCGCAGGGGAGATGGG      |
| FOR_csi-miRN16 | ATCTGCTGATGAGAGAGCGA    |
| FOR_csi-miRN24 | ATCCGAGCAAGCATCCTGG     |
| FOR_csi-miRN25 | ATCCAGGGATTTCATGAAACAT  |
| FOR_csi-miRN26 | ATTAACAGGAGGTGGAACAAAT  |
| FOR_csi-miRN31 | ATTACCGTTGAGGTAGGGCA    |
| FOR_csi-miRN32 | ATTCGATCTATTTGGATGAAGAT |
| FOR_csi-miRN36 | ATTATGGTCATGGGAGGATTG   |
| FOR_csi-miRN37 | CGGCATGAGGGAAGAGCTT     |

---

---

Universal reverse primer

---

Reverse

GTGCAGGGTCCGAGGT

---
